# Supplementary material for: Genome-wide analysis of Candida albicans gene expression patterns during infection of the mammalian kidney
Source: PubMed Central journal article supplement (PMC2698078; doi:10.1016/j.fgb.2008.10.012), 2009-02
Supplement: mmc1.pdf [file mmc1.pdf]

## Supplementary Data

| Sheet Title                  | Contents                                                                                       |
|------------------------------|------------------------------------------------------------------------------------------------|
| 1 Summary                    | Summary of data sheets in Supplementary Data                                                   |
| 2 Control Complete Dataset   | Control microarrays: complete dataset                                                          |
| 3 Control Regulated Genes    | Control microarrays: up- and down-regulated genes                                              |
| 4 SC5314 Complete Dataset    | SC5314 microarrays: complete dataset                                                           |
| 5 SC5314 - Up genes          | SC5314 microarrays: up-regulated genes                                                         |
| 6 SC5314 - Down genes        | SC5314 microarrays: down-regulated genes                                                       |
| 7 NGY152 Complete Dataset    | NGY152 microarrays: complete dataset                                                           |
| 8 NGY152 - Up genes          | NGY152 microarrays: up-regulated genes                                                         |
| 9 NGY152 - Down genes        | NGY152 microarrays: down-regulated genes                                                       |
| 10 Kidney Comparisons        | Comparison of NGY152 expression profiles in different kidneys                                  |
| 11 Expression v Phenotype    | Gene expression versus virulence phenotype                                                     |
| 12 Primers                   | PCR primers used in this study                                                                 |
| 13 <i>In vivo</i> versus YPD | Microarray data comparing <i>C. albicans</i> grown <i>in vivo</i> or in YPD (relative to RMPI) |
| 14 RNA integrity             | Integrity of RNA preps from fungal cells infecting kidney                                      |
| 15 SC5314 versus NGY152      | qRT-PCR of transcript levels in SC5314 and NGY152                                              |
