# Supplementary material for: Genome-wide analysis of Candida albicans gene expression patterns during infection of the mammalian kidney
Source: PubMed Central journal article supplement (PMC2698078; doi:10.1016/j.fgb.2008.10.012), 2009-02
Supplement: mmc2.pdf [file mmc2.pdf]

## All Genes

Regulation of SC5314 genes in RPMI 1640 plus fixation and centrifugation versus SC5314 genes in RPMI 1640

| Replicate | 1   | 2   | 3   | Common     | Map | Description Function                         | orf19.#      | IPF#  | 19501 Name | MIPS Cate | GO molecular function                                                                                                     |
|-----------|-----|-----|-----|------------|-----|----------------------------------------------|--------------|-------|------------|-----------|---------------------------------------------------------------------------------------------------------------------------|
| CA0001    | 1.0 | 1.0 | 0.9 | IPF19501   |     | complemer unknown function                   |              |       | 19501      | MIPS Cate | GO molecular function                                                                                                     |
| CA0002    | 1.1 | 1.0 | 1.0 | DOC1       |     | 23221..246 component of the ana              | orf19.1252   | 12212 | IPF19501   |           | No significant S.c. match                                                                                                 |
| CA0003    | 0.9 | 1.0 | 0.9 | IPF19484   |     | 31023..322 putative zinc amino peptidase (by |              |       | 19484      | CaDOC1    | CELL CYC enzyme regulator activity                                                                                        |
| CA0005    | 1.0 | 1.1 | 1.0 | IPF14994   |     | 64471..654 unknown function                  | orf19.2414   | 14994 | IPF14984   |           | PROTEIN FATE [folding modification destination]                                                                           |
| CA0006    | 0.9 | 0.9 | 1.0 | IPF2072    |     | 78709..797 unknown function                  | orf19.1156   | 2072  | IPF14994   |           | UNCLASSI molecular_function unknown                                                                                       |
| CA0007    | 1.0 | 1.1 | 1.0 | IPF12061   |     | complemer unknown function                   | orf19.7807   | 12061 | IPF2072    |           | UNCLASSI molecular_function unknown                                                                                       |
| CA0008    | 1.0 | 1.0 | 0.9 | IPF12110   |     | complemer 1,4-butanediol diacryla            | orf19.376    | 12110 | IPF12061   |           | No significant S.c. match                                                                                                 |
| CA0009    | 1.0 | 0.9 | 0.9 | IPF11382   |     | complemer unknown function                   | orf19.8247   | 11382 | IPF12110   |           | No significant S.c. match                                                                                                 |
| CA0010    | 1.0 | 1.1 | 1.0 | IPF16036   |     | 130706..13 similar to Saccharomy             | orf19.7790   | 16036 | IPF11382   |           | No significant S.c. match                                                                                                 |
| CA0011    | 1.1 | 1.0 | 1.0 | IPF17430   |     | complemer possible zinc protease             | orf19.73     | 17430 | IPF16036   |           | PROTEIN I transporter activity                                                                                            |
| CA0012    | 0.9 | 1.0 | 0.9 | IPF19448   |     | 153218..15 similar to Saccharomy             | orf19.1343   | 19448 | IPF17430   |           | PROTEIN I molecular_function unknown                                                                                      |
| CA0013    | 1.1 | 1.0 | 0.9 | MAK32      |     | 164949..16 sugar kinase (by homo             | orf19.4548   | 14749 | IPF19448   |           | Lipid fatty-ε transferase activity                                                                                        |
| CA0014    | 0.9 | 1.1 | 1.0 | IPF13368   |     | complemer unknown function                   | orf19.1103   | 13368 | CaMAK32    |           | TRANSP molecular_function unknown                                                                                         |
| CA0015    | 0.9 | 0.9 | 1.0 | PHO87.5E   |     | 180249..18 Member of the phosph              | orf19.9990   | 19824 | IPF13368   |           | No significant S.c. match                                                                                                 |
| CA0016    | 1.0 | 1.0 | 1.1 | CAN5.5     |     | 196184..19 basic-amino-acid permease, 5-pr   |              | 14582 | CaPHO87.   |           | Phosphate metabolism REGULATION OF/INTERACTION WITH CELLULAR ENVIRONMENT TRANSPORT FACILITATION                           |
| CA0017    | 1.0 | 0.9 | 0.9 | IPF17811   |     | 208654..20 unknown function                  |              | 17811 | CaCAN5.5   |           | No significant S.c. match                                                                                                 |
| CA0018    | 1.0 | 0.9 | 1.0 | IPF19435   |     | complemer unknown function                   |              | 19435 | IPF17811   |           | No significant S.c. match                                                                                                 |
| CA0019    | 1.0 | 1.0 | 1.0 | IPF17799   |     | 229761..23 unknown function                  |              | 17799 | IPF19435   |           | No significant S.c. match                                                                                                 |
| CA0020    | 0.9 | 0.9 | 1.1 | IPF7046    |     | complemer unknown function                   | orf19.124    | 7046  | IPF17799   |           | UNCLASSI molecular_function unknown                                                                                       |
| CA0021    | 0.8 | 0.8 | 0.9 | IPF19425   |     | complemer unknown function                   | orf19.161    | 19425 | IPF7046    |           | UNCLASSI protein binding                                                                                                  |
| CA0022    | 0.8 | 0.9 | 0.9 | IPF19421   |     | complemer unknown function                   | orf19.162    | 19421 | IPF19425   |           | No significant S.c. match                                                                                                 |
| CA0023    | 0.9 | 0.9 | 1.1 | IPF6922    |     | complemer unknown function                   | orf19.3788   | 6922  | IPF19421   |           | No significant S.c. match                                                                                                 |
| CA0024    | 1.0 | 1.0 | 1.1 | RPC31.5E   |     | 271877..27 DNA-directed RNA pol              | orf19.1034   | 14908 | IPF6922    |           | No significant S.c. match                                                                                                 |
| CA0025    | 1.0 | 0.9 | 1.0 | IPF17945   |     | 281103..28 unknown function                  | orf19.178    | 17945 | CaRPC31.   |           | No significant S.c. match                                                                                                 |
| CA0026    | 0.8 | 0.8 | 0.6 | IPF16843   |     | complemer unknown function                   |              | 16843 | IPF17945   |           | No significant S.c. match                                                                                                 |
| CA0027    | 1.0 | 0.9 | 1.0 | RCL1       |     | 345150..34 RNA 3-terminal phosph             | orf19.1886   | 9148  | IPF16843   |           | UNCLASSI molecular_function unknown                                                                                       |
| CA0028    | 0.9 | 0.7 | 0.9 | IPF15345   |     | 350274..35 peptidyl-tRNA-hydrola             | orf19.1502   | 15345 | CaRCL1     |           | TRANSCR molecular_function unknown                                                                                        |
| CA0029    | 1.0 | 0.9 | 1.0 | PET56      |     | complemer ribosomal RNA methyl               | orf19.182    | 13421 | IPF15345   |           | No significant S.c. match                                                                                                 |
| CA0030    | 0.9 | 0.9 | 1.0 | IPF17790   |     | 367177..36 unknown function                  | orf19.7710   | 17790 | CaPET56    |           | TRANSCR transferase activity                                                                                              |
| CA0031    | 1.2 | 1.1 | 1.1 | COX7       |     | complemer Subunit VII of cytochro            | orf19.227    | 15250 | IPF17790   |           | TRANSCR RNA binding                                                                                                       |
| CA0032    | 1.0 | 1.0 | 1.0 | IPF15248   |     | complemer zinc finger protein (by I          | orf19.229    | 15248 | CaCOX7     |           | ENERGY " oxidoreductase activity                                                                                          |
| CA0034    | 1.1 | 1.1 | 1.0 | IPF8016    |     | complemer unknown function                   |              | 8016  | IPF15248   |           | UNCLASSI molecular_function unknown                                                                                       |
| CA0035    | 1.0 | 1.0 | 1.0 | PRC3       |     | 418049..41 Carboxypeptidase Y                | orf19.1001   | 7205  | IPF8016    |           | No significant S.c. match                                                                                                 |
| CA0036    | 0.8 | 5.3 | 0.8 | IPF19377   |     | 437969..43 unknown function                  | orf19.3336   | 19377 | CaPRC3     |           | PROTEIN I peptidase activity                                                                                              |
| CA0037    | 1.4 | 3.3 | 1.0 | IPF17652   |     | 443186..44 reverse transcriptase,            | orf19.6078   | 17652 | IPF19377   |           | No significant S.c. match                                                                                                 |
| CA0038    | 0.6 | 0.6 | 0.9 | CYC1       |     | 451363..45 cytochrome-c isoform              | orf19.1770   | 17424 | IPF17652   |           | No significant S.c. match                                                                                                 |
| CA0039    | 1.0 | 1.0 | 0.9 | IPF3998    |     | 466972..46 unknown function                  | orf19.8278   | 3998  | CaCYC1     |           | ENERGY ε transporter activity                                                                                             |
| CA0040    | 1.0 | 0.8 | 1.0 | IPF15632   |     | complemer unknown function                   | orf19.1097   | 15632 | IPF3998    |           | No significant S.c. match                                                                                                 |
| CA0041    | 0.9 | 0.9 | 0.9 | IPF10360   |     | complemer unknown function                   | orf19.3804   | 10360 | IPF15632   |           | No significant S.c. match                                                                                                 |
| CA0043    | 0.3 | 0.2 | 1.0 | HRD1       |     | 498030..49 Involved in degradatio            | orf19.719    | 17505 | IPF10360   |           | UNCLASSI molecular_function unknown                                                                                       |
| CA0044    | 1.0 | 0.9 | 0.9 | IPF17347   |     | complemer unknown function                   | orf19.6492   | 17347 | CaHRD1     |           | PROTEIN I ligase activity                                                                                                 |
| CA0045    | 1.1 | 1.3 | 1.3 | IPF8985.5E |     | complemer unknown function, 5-pr             | orf19.1368   | 8985  | IPF17347   |           | TRANSCRIPTION                                                                                                             |
| CA0046    | 1.2 | 1.1 | 1.0 | IPF14850   |     | complemer Hypothetical protein               | orf19.9988   | 14850 | IPF8985.5E |           | No significant S.c. match                                                                                                 |
| CA0047    | 1.3 | 1.2 | 1.1 | PTC2       |     | 556497..55 Protein phosphatase ty            | orf19.2538   | 17818 | IPF14850   |           | No significant S.c. match                                                                                                 |
| CA0048    | 0.9 | 1.0 | 1.1 | TIF4631    |     | complemer mRNA cap-binding pro               | orf19.3599   | 17394 | CaPTC2     |           | CLASSIFIC protein phosphatase activity                                                                                    |
| CA0049    | 1.0 | 1.0 | 1.0 | IPF3908    |     | 586067..58 unknown function                  | orf19.757    | 3908  | CaTIF4631  |           | PROTEIN I translation regulator activity                                                                                  |
| CA0050    | 1.0 | 0.9 | 1.1 | CTA25      |     | 595830..59 transcriptional activati          | orf19.362    | 10947 | IPF3908    |           | UNCLASSIFIED PROTEINS                                                                                                     |
| CA0051    | 1.0 | 1.2 | 1.1 | IPF4443    |     | 607166..60 unknown function                  | orf19.1217   | 4443  | CaCTA25    |           | No significant S.c. match                                                                                                 |
| CA0052    | 1.0 | 0.9 | 0.9 | IPF19567   |     | complemer Unknown function                   | orf19.379    | 19567 | IPF4443    |           | No significant S.c. match                                                                                                 |
| CA0053    | 1.0 | 1.1 | 1.0 | IFA16      |     | 621045..62 unknown function                  | orf19.380    | 19573 | IPF19567   |           | UNCLASSI molecular_function unknown                                                                                       |
| CA0054    | 1.1 | 1.2 | 1.1 | RIB4.3     |     | complemer 6,7-dimethyl-8-ribityll            | umazine synt | 4908  | CaIFA16    |           | Nucleotide metabolism CELL CYCLE AND DNA PROCESSING CELLULAR COMMUNICATION/SIGNAL TRANSDUCTION MECHANISM                  |
| CA0055    | 1.2 | 1.4 | 1.1 | IPF12442   |     | complemer unknown function                   | orf19.1091   | 12442 | CaRIB4.3   |           | Metabolism isomerase activity                                                                                             |
| CA0056    | 0.9 | 0.9 | 0.9 | IPF15839   |     | complemer unknown function                   | orf19.556    | 15839 | IPF12442   |           | UNCLASSI molecular_function unknown                                                                                       |
| CA0057    | 1.0 | 1.0 | 1.0 | IPF3767    |     | complemer unknown function                   |              | 3767  | IPF15839   |           | No significant S.c. match                                                                                                 |
| CA0058    | 1.0 | 0.9 | 0.9 | IPF3770    |     | 691896..69 similar to Saccharomyces cerevisi |              | 3770  | IPF3767    |           | UNCLASSI molecular_function unknown                                                                                       |
| CA0059    | 1.0 | 1.1 | 1.0 | IPF17840   |     | 694776..69 unknown function                  | orf19.566    | 17840 | IPF3770    |           | CELL CYCLE AND DNA PROCESSING ""PROTEIN FATE [folding modification destination] ""CELLULAR TRANSPORT AND TRANSPOR         |
| CA0060    | 1.0 | 1.0 | 0.9 | IPF13661   |     | complemer unknown function                   | orf19.1699   | 13661 | IPF17840   |           | UNCLASSIFIED PROTEINS                                                                                                     |
| CA0061    | 0.9 | 0.9 | 1.0 | IPF19315   |     | complemer unknown function, 3-prime end      |              | 19316 | IPF13661   |           | UNCLASSI molecular_function unknown                                                                                       |
| CA0062    | 1.0 | 1.0 | 1.1 | IPF19315   |     | complemer unknown function, 5-prime end      |              | 19315 | IPF19315   |           | No significant S.c. match                                                                                                 |
| CA0063    | 1.0 | 0.9 | 1.0 | IPF19310   |     | complemer unknown function, 3-prime end      |              | 19310 | IPF19315   |           | No significant S.c. match                                                                                                 |
| CA0064    | 1.0 | 0.9 | 0.9 | IPF19308   |     | complemer unknown function, 3-prime end      |              | 19308 | IPF19310   |           | No significant S.c. match                                                                                                 |
| CA0066    | 1.0 | 1.0 | 0.9 | IPF15051   |     | 751455..75 unknown function                  | orf19.8843   | 15051 | IPF19308   |           | No significant S.c. match                                                                                                 |
| CA0067    | 0.9 | 0.9 | 0.9 | IPF13904   |     | 756390..75 farnesyl cysteine carb            | orf19.120    | 13904 | IPF15051   |           | No significant S.c. match                                                                                                 |
| CA0068    | 1.0 | 0.9 | 1.0 | ARC18      |     | complemer subunit of the Arp2/3 c            | orf19.121    | 13905 | IPF13904   |           | Lipid fatty-acid and isoprenoid metabolism """"PROTEIN FATE [folding modification destination] ""SUBCELLULAR LOCALISATION |
| CA0069    | 0.9 | 1.0 | 1.0 | IPF19295   |     | complemer unknown function, inte             | orf19.6468   | 19295 | CaARC18    |           | CELLULAF structural molecule activity                                                                                     |

|        |     |     |     |            |                                                |       |            |                                                                                                                  |
|--------|-----|-----|-----|------------|------------------------------------------------|-------|------------|------------------------------------------------------------------------------------------------------------------|
| CA0070 | 1.0 | 1.1 | 0.9 | IPF19295.1 | 768787..77 unknown function, 3-prorf19.6469    | 19294 | IPF19295.1 | No significant S.c. match                                                                                        |
| CA0071 | 1.0 | 0.9 | 1.0 | IPF19290.1 | complemer unknown function, 3-prorf19.621      | 19290 | IPF19295.1 | UNCLASSIFIED PROTEINS                                                                                            |
| CA0072 | 0.8 | 0.7 | 0.9 | IPF19283.1 | complemer unknown function, 3-prorf19.625      | 19284 | IPF19290.1 | No significant S.c. match                                                                                        |
| CA0073 | 1.0 | 1.0 | 0.9 | IPF19283.1 | complemer unknown function, 5-prime end        | 19283 | IPF19283.1 | No significant S.c. match                                                                                        |
| CA0074 | 1.1 | 1.3 | 1.1 | IFD7       | 786781..78 Putative aryl-alcohol deorf19.629   | 17480 | IPF19283.1 | No significant S.c. match                                                                                        |
| CA0075 | 0.9 | 0.9 | 1.0 | IFA24.3    | 789556..79 unknown function, 3-prorf19.9164    | 17205 | CaIFD7     | C-compound and carbohydrate metabolism ENERGY                                                                    |
| CA0076 | 1.1 | 1.5 | 1.3 | IPF8866    | complemer unknown function orf19.4906          | 8866  | CaIFA24.3  | UNCLASSIFIED PROTEINS                                                                                            |
| CA0077 | 1.0 | 1.0 | 1.0 | IPF1239    | 801371..80 unknown function                    | 1239  | IPF8866    | No significant S.c. match                                                                                        |
| CA0078 | 1.0 | 1.0 | 1.0 | CTA27      | complemer transcriptional activation           | 17380 | IPF1239    | PROTEIN FATE [folding modification destination] ""SUBCELLULAR LOCALISATION                                       |
| CA0079 | 0.9 | 0.8 | 0.9 | IPF14323   | complemer unknown function orf19.4730          | 14323 | CaCTA27    | No significant S.c. match                                                                                        |
| CA0080 | 1.1 | 0.9 | 1.0 | IPF11378   | 826422..82 unknown function orf19.632          | 11378 | IPF14323   | UNCLASSIMolecular_function unknown                                                                               |
| CA0081 | 0.9 | 0.9 | 1.0 | IPF11379   | complemer unknown function orf19.633           | 11379 | IPF11378   | No significant S.c. match                                                                                        |
| CA0083 | 1.0 | 1.8 | 0.8 | PHO84      | complemer high-affinity inorganic p orf19.655  | 5438  | IPF11379   | No significant S.c. match                                                                                        |
| CA0084 | 1.2 | 1.1 | 0.9 | NAB3       | complemer polyadenylated RNA-b orf19.12971     | 4338  | CaPHO84    | Phosphate metabolism CELLULAR TRANSPORT AND TRANSPORT MECHANISMS REGULATION OF/INTERACTION WITH CELLULAF         |
| CA0085 | 0.8 | 1.0 | 0.8 | IPF16201   | 851158..85 unknown function orf19.693          | 16201 | CaNAB3     | TRANSCR molecular_function unknown                                                                               |
| CA0086 | 1.1 | 1.0 | 1.2 | IPF16598   | complemer unknown function orf19.7781          | 16598 | IPF16201   | No significant S.c. match                                                                                        |
| CA0087 | 1.1 | 0.9 | 0.9 | SMF11      | 858028..85 manganese transporte orf19.4690     | 14122 | IPF16598   | Lipid fatty-ε transferase activity                                                                               |
| CA0088 | 1.0 | 1.0 | 1.0 | IPF7349    | 866183..86 similar to Saccharomyorf19.579      | 7349  | CaSMF11    | PROTEIN FATE [folding modification destination] ""CELLULAR TRANSPORT AND TRANSPORT MECHANISMS REGULATION OF/INTE |
| CA0089 | 1.0 | 0.9 | 0.9 | MRPL3      | complemer ribosomal protein of thorf19.5064    | 19552 | IPF7349    | Metabolismr transferase activity                                                                                 |
| CA0090 | 0.8 | 0.6 | 1.0 | UBP13      | 875277..87 ubiquitin carboxyl-term orf19.2026  | 4114  | CaMRPL3    | PROTEIN t structural molecule activity                                                                           |
| CA0092 | 0.9 | 0.9 | 1.0 | IPF8268.3f | 890368..89 member of the FRP far orf19.1571    | 8269  | CaUBP13    | PROTEIN l peptidase activity                                                                                     |
| CA0093 | 1.0 | 1.0 | 1.0 | IPF19980.f | complemer putative lipase (by horn orf19.7747  | 10462 | IPF8268.3f | C-compound and carbohydrate metabolism                                                                           |
| CA0094 | 0.6 | 0.4 | 0.8 | IPF12819   | 932035..93 unknown function orf19.3213         | 12819 | IPF19980.r | Lipid fatty-acid and isoprenoid metabolism                                                                       |
| CA0095 | 1.0 | 1.0 | 1.0 | ALG11      | 936850..93 required for asparagin orf19.3468   | 19249 | IPF12819   | UNCLASSIFIED PROTEINS                                                                                            |
| CA0096 | 1.1 | 1.0 | 1.0 | IPF13409   | complemer unknown function orf19.751           | 13409 | CaALG11    | C-compour transferase activity                                                                                   |
| CA0097 | 1.0 | 0.9 | 1.1 | IPF13290   | 949021..94 unknown function orf19.5314         | 13290 | IPF13409   | UNCLASSIMolecular_function unknown                                                                               |
| CA0098 | 0.8 | 1.0 | 1.0 | IPF16479   | 954432..95 unknown function orf19.2319         | 16479 | IPF13290   | PROTEIN SYNTHESIS SUBCELLULAR LOCALISATION                                                                       |
| CA0100 | 1.1 | 1.1 | 1.0 | IPF11569   | complemer unknown function orf19.7682          | 11569 | IPF16479   | UNCLASSIMolecular_function unknown                                                                               |
| CA0101 | 1.0 | 1.0 | 1.0 | IPF10105   | complemer RNA polymerase-like ( orf19.232      | 10105 | IPF11569   | No significant S.c. match                                                                                        |
| CA0102 | 1.0 | 1.0 | 1.0 | IPF16695   | complemer unknown function orf19.736           | 16695 | IPF10105   | TRANSCR transcription regulator activity                                                                         |
| CA0103 | 1.2 | 1.1 | 1.0 | IPF17515   | 1017198..1 unknown function orf19.749          | 17515 | IPF16695   | C-compour transcription regulator activity                                                                       |
| CA0104 | 1.0 | 1.1 | 1.1 | RBT4       | complemer repressed by TUP1 prorf19.1358:      | 8153  | IPF17515   | PROTEIN FATE [folding modification destination] ""CELLULAR TRANSPORT AND TRANSPORT MECHANISMS                    |
| CA0105 | 0.9 | 1.0 | 1.0 | IPF17529.1 | complemer unknown function, 3-prorf19.786      | 17529 | CaRBT4     | CELL FATE Hypha-specific                                                                                         |
| CA0106 | 1.1 | 1.0 | 1.1 | IPF16308   | complemer unknown function orf19.1133:         | 16308 | IPF17529.1 | No significant S.c. match                                                                                        |
| CA0107 | 1.0 | 1.0 | 1.1 | POL3.5EO   | complemer DNA Polymerase III, 5- orf19.5183    | 17951 | IPF16308   | No significant S.c. match                                                                                        |
| CA0108 | 0.8 | 0.9 | 0.9 | HIK1.5EO   | 1035652..1 histidine kinase, 5-prir orf19.5181 | 19235 | CaPOL3.5ε  | CELL CYC nucleotidyltransferase activity                                                                         |
| CA0109 | 1.0 | 1.1 | 1.0 | IPF13723   | complemer unknown function orf19.7892          | 13723 | CaHIK1.5ε  | C-compound and carbohydrate metabolism CELLULAR COMMUNICATION/SIGNAL TRANSDUCTION MECHANISM ""CELL RESCUE DE     |
| CA0110 | 1.0 | 1.1 | 1.0 | IPF17190   | 1043744..1 unknown function orf19.1135:        | 17190 | IPF13723   | No significant S.c. match                                                                                        |
| CA0111 | 0.9 | 0.9 | 1.0 | IPF16830   | 1049792..1 similar to Saccharomyorf19.4151     | 16830 | IPF17190   | No significant S.c. match                                                                                        |
| CA0112 | 1.0 | 1.0 | 1.1 | IPF17358   | complemer unknown function orf19.5754          | 17358 | IPF16830   | Lipid fatty-ε hydrolase activity                                                                                 |
| CA0113 | 1.0 | 1.0 | 1.2 | AUT2       | 1070596..1 anchor protein mediate orf19.9938   | 14934 | IPF17358   | UNCLASSIMolecular_function unknown                                                                               |
| CA0114 | 1.1 | 1.2 | 1.1 | SSU72      | 1072101..1 suppressor of cs mutar orf19.9939   | 14932 | CaAUT2     | PROTEIN l protein binding                                                                                        |
| CA0116 | 1.0 | 1.0 | 1.0 | IPF17975   | 1082630..1 unknown function orf19.915          | 17975 | CaSSU72    | TRANSCR protein phosphatase activity                                                                             |
| CA0117 | 1.0 | 1.1 | 1.0 | IPF19231   | 1085355..1 unknown function orf19.916          | 19231 | IPF17975   | No significant S.c. match                                                                                        |
| CA0118 | 1.0 | 1.0 | 0.9 | IPF16430.1 | 1088771..1 similar to Saccharomyces cerevisi   | 16430 | IPF19231   | UNCLASSIMolecular_function unknown                                                                               |
| CA0119 | 0.9 | 0.9 | 1.0 | RMT2       | 1092915..1 N-delta-arginine methy orf19.920    | 16809 | IPF16430.1 | ENERGY ε transporter activity,oxidoreductase activity                                                            |
| CA0120 | 1.0 | 1.1 | 1.0 | IPF19593   | complemer similar to Saccharomyces cerevisi    | 19593 | CaRMT2     | Amino acid transferase activity                                                                                  |
| CA0121 | 0.8 | 0.7 | 1.0 | IPF17048   | 1104885..1 unknown function orf19.983          | 17048 | IPF19593   | PROTEIN l peptidase activity                                                                                     |
| CA0122 | 1.0 | 1.0 | 1.0 | SNF4       | complemer Nuclear regulatory prol orf19.1319   | 6988  | IPF17048   | UNCLASSIMolecular_function unknown                                                                               |
| CA0123 | 1.3 | 0.9 | 1.2 | MXR1       | 1122583..1 methionine sulfoxide re orf19.9576  | 4117  | CaSNF4     | C-compour enzyme regulator activity                                                                              |
| CA0124 | 0.9 | 1.2 | 1.0 | RFC5       | 1123567..1 DNA replication factor orf19.9577   | 4118  | CaMXR1     | Amino acid oxidoreductase activity                                                                               |
| CA0125 | 0.9 | 1.0 | 1.0 | IPF4119    | complemer unknown function orf19.9578          | 4119  | CaRFC5     | CELL CYC molecular_function unknown                                                                              |
| CA0126 | 1.0 | 1.1 | 1.0 | IPF4284    | complemer unknown function orf19.8177          | 4284  | IPF4119    | No significant S.c. match                                                                                        |
| CA0127 | 2.7 | 2.6 | 1.6 | HXX2.3F    | complemer hexokinase II, 3-prime orf19.8176    | 4286  | IPF4284    | UNCLASSIMolecular_function unknown                                                                               |
| CA0129 | 1.0 | 1.0 | 1.0 | IPF10495   | complemer unknown function orf19.246           | 10495 | CaHXX2.3f  | C-compour transferase activity                                                                                   |
| CA0130 | 0.9 | 1.0 | 0.9 | IPF4470    | complemer unknown function orf19.3533          | 4470  | IPF10495   | UNCLASSIMolecular_function unknown                                                                               |
| CA0131 | 1.0 | 0.9 | 1.0 | IPF13402   | complemer unknown function orf19.36            | 13402 | IPF4470    | UNCLASSIMolecular_function unknown                                                                               |
| CA0132 | 0.8 | 0.9 | 0.9 | SPT10      | 1160657..1 Transcription regulator orf19.2361  | 16032 | IPF13402   | UNCLASSIMolecular_function unknown                                                                               |
| CA0133 | 1.0 | 1.0 | 1.0 | IPF3746    | 1166485..1 unknown function orf19.1007         | 3746  | CaSPT10    | TRANSCR transferase activity                                                                                     |
| CA0136 | 1.1 | 1.0 | 1.0 | IFH1       | complemer Dioxygenase (by homc orf19.9207      | 10444 | IPF3746    | TRANSCR transferase activity                                                                                     |
| CA0137 | 0.9 | 1.1 | 1.0 | SEC232     | 1186849..1 Component of COPII c orf19.9206     | 10446 | CaIFH1     | CELL RESCUE DEFENSE AND VIRULENCE                                                                                |
| CA0138 | 1.1 | 1.1 | 0.7 | INH1       | 1195101..1 Inhibitor of mitochondrial ATPase   | 7584  | CaSEC232   | CELLULAR TRANSPORT AND TRANSPORT MECHANISMS SUBCELLULAR LOCALISATION                                             |
| CA0139 | 1.1 | 1.0 | 1.1 | RUD3       | 1204769..1 Suppressor of uso1-1 torf19.1418:   | 17098 | CaINH1     | No significant S.c. match                                                                                        |
| CA0140 | 1.1 | 1.0 | 1.0 | MDM1.3     | complemer intermediate filament p orf19.1009   | 19597 | CaRUD3     | CELLULAF molecular_function unknown                                                                              |
| CA0141 | 0.9 | 1.0 | 0.9 | IPF17520.1 | 1228742..1 unknown function, inte orf19.1021   | 17520 | CaMDM1.3   | CELL CYC structural molecule activity                                                                            |
| CA0142 | 1.0 | 1.0 | 1.1 | CSL4       | 1235322..1 Involved in kinetochore orf19.1026  | 17757 | IPF17520.1 | No significant S.c. match                                                                                        |
| CA0143 | 1.0 | 1.0 | 1.0 | IPF19195.1 | 1265314..1 putative amino acid orf19.153       | 19195 | CaCSL4     | Nucleotide RNA binding                                                                                           |
| CA0144 | 1.1 | 1.0 | 1.1 | IPF19195.1 | 1265891..1 putative amino acid orf19.151       | 17861 | IPF19195.1 | Lipid fatty-acid and isoprenoid metabolism ""TRANSPORT FACILITATION                                              |
| CA0145 | 0.8 | 0.7 | 1.0 | IPF11449   | 1272911..1 unknown function                    | 11449 | IPF19195.1 | Lipid fatty-ε molecular_function unknown                                                                         |
| CA0146 | 1.0 | 0.9 | 1.0 | IPF9689    | 1274376..1 unknown function orf19.1113:        | 9689  | IPF11449   | No significant S.c. match                                                                                        |
| CA0147 | 0.8 | 0.8 | 0.8 | IPF9690    | complemer unknown function orf19.1113:         | 9690  | IPF9689    | No significant S.c. match                                                                                        |
| CA0148 | 1.1 | 1.1 | 1.0 | POP1       | 1278472..1 protein component of r orf19.2404   | 14929 | IPF9690    | UNCLASSIFIED PROTEINS                                                                                            |

|        |     |     |     |            |                                                  |                  |                                                                                                         |
|--------|-----|-----|-----|------------|--------------------------------------------------|------------------|---------------------------------------------------------------------------------------------------------|
| CA0149 | 1.0 | 1.0 | 1.0 | VPS34      | 1288898..1 1-phosphatidylinositol :orf19.6243    | 17276 CaPOP1     | TRANSCR RNA binding                                                                                     |
| CA0150 | 1.0 | 1.0 | 1.0 | CDC123     | 1296609..1 similar to Saccharomy orf19.10231     | 6404 CaVPS34     | Lipid fatty-ε protein kinase activity                                                                   |
| CA0151 | 1.0 | 1.0 | 1.0 | IPF15923.ε | complemer unknown function, 5-pr orf19.177       | 15923 CDC123     | CELL CYC molecular_function unknown                                                                     |
| CA0152 | 1.4 | 1.1 | 1.3 | IPF16368.ε | complemer unknown function, 3-pr orf19.254       | 16370 IPF15923.ε | CELL CYCLE AND DNA PROCESSING CELL FATE SUBCELLULAR LOCALISATION                                        |
| CA0153 | 1.0 | 1.0 | 1.0 | IPF16368.ε | complemer Unknown function, 5-p orf19.255        | 16368 IPF16368.ε | No significant S.c. match                                                                               |
| CA0154 | 1.0 | 1.8 | 1.1 | CPH1       | complemer Transcription factor orf19.4433        | 5536 IPF16368.ε  | No significant S.c. match                                                                               |
| CA0155 | 1.1 | 1.2 | 1.2 | RPT6       | complemer 26S proteasome regul orf19.11071       | 13102 CaCPH1     | TRANSCR DNA binding,transcription regulator activity                                                    |
| CA0156 | 1.4 | 1.7 | 1.2 | SCW1       | 1355380..1 glucanase (by homolog orf19.9345      | 15898 CaRPT6     | CELL CYC peptidase activity                                                                             |
| CA0157 | 1.0 | 1.0 | 1.0 | IPF19178.ε | complemer unknown function, 3-prime end          | 19179 CaSCW1     | CLASSIFIC hydrolase activity                                                                            |
| CA0158 | 1.1 | 1.0 | 1.0 | IPF19178.ε | complemer unknown function, 3-pr orf19.1073      | 19178 IPF19178.ε | No significant S.c. match                                                                               |
| CA0159 | 0.9 | 0.9 | 0.9 | TUB4.3     | complemer gamma-tubulin, 3-prim orf19.1238       | 12541 IPF19178.ε | No significant S.c. match                                                                               |
| CA0160 | 1.0 | 1.0 | 1.0 | GAP7.5EO   | complemer general amino acid per orf19.10701     | 11171 CaTUB4.3   | CELL CYC structural molecule activity                                                                   |
| CA0161 | 0.8 | 0.8 | 0.7 | RMS1       | complemer (putative) transcription:orf19.1017    | 10588 CaGAP7.5   | Amino acid metabolism CELLULAR TRANSPORT AND TRANSPORT MECHANISMS SUBCELLULAR LOCALISATION TRANSPORT FA |
| CA0162 | 1.0 | 0.9 | 1.0 | IPF19168   | complemer unknown function orf19.5616            | 19168 CaRMS1     | TRANSCR molecular_function unknown                                                                      |
| CA0163 | 1.1 | 1.3 | 1.1 | AYR2       | 1387498..1 1-acyl dihydroxyaceto orf19.5615      | 15021 IPF19168   | No significant S.c. match                                                                               |
| CA0164 | 1.0 | 0.9 | 1.0 | IPF11694   | complemer similar to Saccharomy orf19.4335       | 11694 CaAYR2     | C-compound and carbohydrate metabolism CELL FATE                                                        |
| CA0165 | 1.0 | 1.0 | 1.0 | IPF19165.ε | complemer unknown function, 3-prime end          | 19165 IPF11694   | TRANSCO transporter activity                                                                            |
| CA0166 | 1.1 | 1.0 | 1.0 | IPF19161.ε | complemer unknown function, internal fragmei     | 19161 IPF19165.ε | No significant S.c. match                                                                               |
| CA0167 | 1.1 | 1.1 | 1.0 | IPF19160   | complemer unknown function orf19.1075            | 19160 IPF19161.ε | No significant S.c. match                                                                               |
| CA0169 | 1.0 | 1.1 | 1.0 | RBT7       | complemer repressed by TUP1 orf19.10191          | 14885 IPF19160   | No significant S.c. match                                                                               |
| CA0170 | 1.0 | 1.1 | 1.1 | IPF15959   | 1442925..1 unknown function orf19.1105           | 15959 CaRBT7     | Nucleotide metabolism                                                                                   |
| CA0171 | 4.8 | 3.9 | 2.1 | IPF15957   | complemer unknown function                       | 15957 IPF15959   | No significant S.c. match                                                                               |
| CA0172 | 1.0 | 0.9 | 1.0 | IPF19154   | 1451467..1 unknown function orf19.1126           | 19154 IPF15957   | No significant S.c. match                                                                               |
| CA0173 | 1.0 | 1.0 | 1.0 | IPF6913    | complemer unknown function orf19.1127:           | 6913 IPF19154    | No significant S.c. match                                                                               |
| CA0174 | 1.0 | 1.0 | 1.0 | IPF11182.ε | 1458377..1 unknown function, 3-prime end         | 11182 IPF6913    | SUBCELLULAR LOCALISATION                                                                                |
| CA0175 | 0.8 | 1.0 | 0.8 | NPL4       | complemer nuclear protein localize orf19.9970    | 19684 IPF11182.ε | UNCLASSI hydrolase activity                                                                             |
| CA0176 | 0.9 | 1.0 | 1.0 | IPF11388   | complemer unknown function orf19.8267            | 11388 CaNPL4     | PROTEIN I protein binding,structural molecule activity                                                  |
| CA0177 | 1.0 | 1.0 | 0.9 | IFL2       | 1473706..1 unknown function orf19.8268           | 20048 IPF11388   | UNCLASSI DNA binding                                                                                    |
| CA0178 | 1.0 | 1.0 | 0.9 | CDC6       | complemer Cell division control pr orf19.1270    | 2017 CaIFL2      | CELL RESCUE DEFENSE AND VIRULENCE ""CELL FATE                                                           |
| CA0179 | 0.9 | 3.4 | 1.0 | DCP1       | 1486194..1 mRNA decapping enzy orf19.423         | 10483 CaCDC6     | CELL CYC protein binding                                                                                |
| CA0180 | 0.9 | 1.0 | 1.0 | SPT20      | 1487158..1 transcription factor, me orf19.422    | 10486 CaDCP1     | TRANSCR hydrolase activity                                                                              |
| CA0181 | 1.0 | 1.0 | 1.0 | NOT3       | complemer unknown function orf19.2012            | 15994 CaSPT20    | TRANSCR transcription regulator activity                                                                |
| CA0182 | 1.0 | 1.0 | 0.9 | IFI1       | 1504556..1 unknown function orf19.1130           | 6166 CaNOT3      | TRANSCRIPTION SUBCELLULAR LOCALISATION                                                                  |
| CA0183 | 1.1 | 1.3 | 0.9 | CAP1       | 1525251..1 transcriptional acivator orf19.9191   | 4242 CaIFI1      | CLASSIFICATION NOT YET CLEAR-CUT                                                                        |
| CA0184 | 1.1 | 1.1 | 0.9 | IPF19142   | complemer unknown function orf19.1146            | 19142 CaCAP1     | TRANSCR DNA binding,transcription regulator activity                                                    |
| CA0185 | 1.0 | 0.9 | 0.9 | PLB4.5F    | 1545784..1 Phospholipase, 5-prim orf19.9017      | 15731 IPF19142   | UNCLASSIFIED PROTEINS                                                                                   |
| CA0186 | 0.9 | 0.9 | 1.0 | PLB4.3F    | 1546979..1 phospholipase, 3-prim orf19.9018      | 15733 CaPLB4.5F  | Lipid fatty-acid and isoprenoid metabolism ""Other virulence attributes                                 |
| CA0187 | 1.0 | 0.9 | 1.0 | IPF15734   | 1548674..1 unknown function                      | 15734 CaPLB4.3F  | Lipid fatty-acid and isoprenoid metabolism ""Other virulence attributes                                 |
| CA0188 | 1.2 | 1.4 | 1.3 | IPF15442   | 1550839..1 unknown function orf19.9467           | 15442 IPF15734   | No significant S.c. match                                                                               |
| CA0189 | 0.9 | 0.9 | 0.7 | IPF12201   | 1556912..1 Na+-nucleoside cotran orf19.11601     | 12201 IPF15442   | UNCLASSI molecular_function unknown                                                                     |
| CA0190 | 1.1 | 1.0 | 1.1 | IPF14773   | 1564584..1 unknown function orf19.11071          | 14773 IPF12201   | No significant S.c. match                                                                               |
| CA0191 | 1.1 | 1.0 | 1.0 | PEX7       | 1568044..1 peroxisomal import prc orf19.89       | 9594 IPF14773    | UNCLASSI molecular_function unknown                                                                     |
| CA0192 | 1.1 | 1.1 | 1.1 | IPF15134   | 1577818..1 Unknown function orf19.1177           | 15134 CaPEX7     | PROTEIN I signal transducer activity                                                                    |
| CA0193 | 0.9 | 1.0 | 1.0 | IPF6493    | 1583508..1 unknown function orf19.1541           | 6493 IPF15134    | SUBCELLI molecular_function unknown                                                                     |
| CA0194 | 0.9 | 1.6 | 0.9 | IPF16228   | 1589730..1 unknown function orf19.1140:          | 16228 IPF6493    | UNCLASSIFIED PROTEINS                                                                                   |
| CA0195 | 0.9 | 1.0 | 1.0 | IPF12688   | 1590754..1 unknown function orf19.1140:          | 12688 IPF16228   | UNCLASSI hydrolase activity                                                                             |
| CA0196 | 0.8 | 0.8 | 1.0 | IPF15799   | 1598544..1 unknown function orf19.1651           | 15799 IPF12688   | Amino acid molecular_function unknown                                                                   |
| CA0197 | 1.2 | 1.0 | 1.0 | IPF9787    | complemer similar to Saccharomy orf19.1934       | 9787 IPF15799    | UNCLASSIFIED PROTEINS                                                                                   |
| CA0198 | 1.0 | 1.2 | 0.9 | IPF19685   | 1609514..1 unknown function orf19.9227           | 19685 IPF9787    | TRANSCR DNA binding                                                                                     |
| CA0199 | 1.0 | 0.9 | 0.9 | KAP104     | complemer karyopherin-beta prote orf19.3556      | 16463 IPF19685   | UNCLASSI molecular_function unknown                                                                     |
| CA0200 | 1.1 | 1.6 | 0.9 | IPF15119   | complemer unknown function orf19.9109            | 15119 CaKAP104   | CELLULAF nucleotidyltransferase activity                                                                |
| CA0201 | 1.0 | 1.0 | 0.9 | IPF15116   | complemer Unknown function orf19.9108            | 15116 IPF15119   | CELLULAF transporter activity                                                                           |
| CA0202 | 1.0 | 0.9 | 1.0 | IPF19126   | complemer putative aminoacid trar orf19.1210     | 19126 IPF15116   | UNCLASSI molecular_function unknown                                                                     |
| CA0203 | 0.9 | 1.1 | 1.1 | MID1       | 1638166..1 involved in Ca2+ influx orf19.1072:   | 12820 IPF19126   | TRANSCO transporter activity                                                                            |
| CA0204 | 0.8 | 0.9 | 0.8 | IKI3       | 1641499..1 killer toxin insensitive ε orf19.1222 | 15693 CaMID1     | REGULATI transporter activity                                                                           |
| CA0205 | 1.0 | 1.1 | 1.0 | DBF2       | complemer putative ser/thr protein orf19.1223    | 13853 CaIKI3     | CLASSIFIC transcription regulator activity                                                              |
| CA0206 | 0.9 | 0.9 | 1.0 | IPF14089   | 1675193..1 putative serine/threonin orf19.1029   | 14089 CaDBF2     | CELL CYC protein kinase activity                                                                        |
| CA0207 | 1.0 | 1.0 | 1.0 | IPF18002   | 1695412..1 Unknown function orf19.1226           | 18002 IPF14089   | ENERGY CELL CYCLE AND DNA PROCESSING SUBCELLULAR LOCALISATION                                           |
| CA0208 | 1.0 | 1.0 | 1.1 | IPF19850   | 1697550..1 unknown function orf19.1227           | 19850 IPF18002   | UNCLASSIFIED PROTEINS                                                                                   |
| CA0209 | 0.9 | 1.0 | 0.9 | HAP2       | 1699253..1 CCAAT-binding factor orf19.1228       | 16519 IPF19850   | Amino acid metabolism TRANSCRIPTION SUBCELLULAR LOCALISATION UNCLASSIFIED PROTEINS                      |
| CA0210 | 0.6 | 0.4 | 1.0 | IPF4328    | complemer unknown function orf19.1297            | 4328 CaHAP2      | TRANSCR transcription regulator activity                                                                |
| CA0211 | 1.0 | 1.0 | 1.0 | IPF4326    | complemer unknown function orf19.12971           | 4326 IPF4328     | UNCLASSI molecular_function unknown                                                                     |
| CA0212 | 0.9 | 0.9 | 1.0 | IPF4325    | 1705735..1 unknown function orf19.12961          | 4325 IPF4326     | No significant S.c. match                                                                               |
| CA0213 | 1.0 | 1.0 | 1.0 | CDS1       | complemer CDP-diacylglycerol syr orf19.1279      | 16312 IPF4325    | No significant S.c. match                                                                               |
| CA0214 | 1.1 | 1.1 | 1.1 | SCT11      | 1727719..1 Suppresses a choline-1orf19.1289      | 9596 CaCDS1      | Lipid fatty-ε nucleotidyltransferase activity                                                           |
| CA0215 | 1.0 | 0.9 | 0.9 | IPF15350   | 1733843..1 putative zinc finger trar orf19.2745  | 15350 CaSCT11    | TRANSCO transferase activity                                                                            |
| CA0216 | 0.9 | 1.0 | 1.0 | IPF11681   | complemer unknown function orf19.1682            | 11681 IPF15350   | Amino acid transcription regulator activity,DNA binding                                                 |
| CA0217 | 1.0 | 0.9 | 1.0 | MNN4       | 1752492..1 regulates the mannosy orf19.849       | 19522 IPF11681   | No significant S.c. match                                                                               |
| CA0218 | 0.9 | 1.0 | 0.9 | IPF15294   | 1765941..1 unknown function orf19.6238           | 15294 CaMNN4     | PROTEIN I molecular_function unknown                                                                    |
| CA0219 | 0.9 | 1.1 | 1.0 | YAP3       | complemer transcription factor of ε orf19.3193   | 19852 IPF15294   | No significant S.c. match                                                                               |
| CA0220 | 1.0 | 1.0 | 1.0 | ABZ1       | complemer para-aminobenzoate s' orf19.1291       | 10474 CaYAP3     | TRANSCR DNA binding,transcription regulator activity                                                    |
| CA0221 | 0.9 | 0.9 | 1.0 | PUS4       | 1785176..1 pseudouridine synthas orf19.9509      | 16835 CaABZ1     | Metabolisr lyase activity                                                                               |

|        |     |     |     |            |                                             |             |                  |                                                                                                          |
|--------|-----|-----|-----|------------|---------------------------------------------|-------------|------------------|----------------------------------------------------------------------------------------------------------|
| CA0222 | 0.9 | 1.0 | 0.9 | IPF12141   | 1786478..1 unknown function                 | orf19.9508  | 12141 CaPUS4     | Nucleotide lyase activity                                                                                |
| CA0223 | 1.0 | 1.0 | 0.9 | VAS1       | complemer valyl-tRNA synthetase             | orf19.1295  | 13980 IPF12141   | UNCLASSIFIED PROTEINS                                                                                    |
| CA0224 | 0.9 | 0.7 | 1.0 | PRP31      | complemer pre-mRNA splicing pro             | orf19.1296  | 13982 CaVAS1     | PROTEIN :ligase activity                                                                                 |
| CA0225 | 0.9 | 1.0 | 1.0 | NUP84      | complemer nuclear pore protein (b           | orf19.1298  | 16027 CaPRP31    | TRANSCR RNA binding                                                                                      |
| CA0226 | 1.0 | 1.0 | 1.0 | IPF16024   | 1805331..1 unknown function                 | orf19.1297  | 16024 CaNUP84    | CELLULAFstructural molecule activity                                                                     |
| CA0227 | 1.1 | 1.0 | 1.0 | PHO23      | complemer Involved in transcriptio          | orf19.9328  | 6854 IPF16024    | UNCLASSIFIED PROTEINS                                                                                    |
| CA0228 | 0.9 | 0.9 | 0.9 | IPT1       | complemer Mannosyl diphosphory              | orf19.1223  | 11674 CaPHO23    | TRANSCR hydrolase activity                                                                               |
| CA0229 | 0.9 | 0.9 | 1.0 | IPF8147    | 1820547..1 unknown function                 | orf19.1358  | 8147 CaIPT1      | Lipid fatty- $\alpha$ transferase activity                                                               |
| CA0230 | 1.0 | 0.9 | 1.0 | TOM37      | 1826653..1 Mitochondrial outer me           | orf19.1532  | 17420 IPF8147    | CELL FATE                                                                                                |
| CA0231 | 1.0 | 1.2 | 1.0 | RAD23      | complemer nucleotide excision rep           | orf19.1494  | 16846 CaTOM37    | No significant S.c. match                                                                                |
| CA0232 | 0.9 | 0.9 | 1.0 | IFA1       | 1837394..1 Unknown function                 | orf19.156   | 15128 CaRAD23    | CELL CYC DNA binding                                                                                     |
| CA0233 | 0.8 | 0.6 | 0.9 | URE2       | 1840615..1 Nitrogen catabolite rep          | orf19.7794  | 15126 CaIFA1     | Nucleotide metabolism CELL CYCLE AND DNA PROCESSING CELLULAR COMMUNICATION/SIGNAL TRANSDUCTION MECHANISM |
| CA0234 | 1.0 | 1.0 | 1.0 | IFA3       | 1842051..1 unknown function                 | orf19.7793  | 19598 CaURE2     | Nitrogen ar transcription regulator activity                                                             |
| CA0235 | 1.0 | 0.9 | 0.9 | HIS3       | complemer imidazole glycerol pho            | orf19.7813  | 13420 CaIFA3     | UNCLASSI molecular_function unknown                                                                      |
| CA0236 | 1.0 | 0.9 | 1.0 | MDM10      | 1853443..1 Involved in mitochondr           | orf19.7814  | 13419 CaHIS3     | Amino acid lyase activity                                                                                |
| CA0237 | 0.9 | 1.0 | 1.0 | IPF13416   | complemer Unknown function                  | orf19.7818  | 13416 CaMDM10    | SUBCELLL molecular_function unknown                                                                      |
| CA0238 | 1.0 | 0.9 | 1.0 | PHA2.3     | complemer prephenate dehydratas             | orf19.7864  | 10101 IPF13416   | SUBCELLL molecular_function unknown                                                                      |
| CA0239 | 1.1 | 1.2 | 1.1 | RPL9B      | complemer RPL9B ribosomal pro               | orf19.236   | 10099 CaPHA2.3   | Amino acid lyase activity                                                                                |
| CA0241 | 1.0 | 0.9 | 0.9 | IPF15630   | complemer unknown function                  | orf19.3470  | 15630 CaRPL9B    | PROTEIN 'structural molecule activity                                                                    |
| CA0242 | 1.0 | 0.9 | 0.9 | IPF12047   | complemer unknown function                  | orf19.3471  | 12047 IPF15630   | UNCLASSI molecular_function unknown                                                                      |
| CA0243 | 1.1 | 0.9 | 1.0 | BSD2       | complemer Metal homeostasis pro             | orf19.5869  | 15266 IPF12047   | No significant S.c. match                                                                                |
| CA0244 | 1.1 | 0.9 | 1.0 | IPF19082   | 1890894..1 unknown function                 |             | 19082 CaBSD2     | REGULATI molecular_function unknown                                                                      |
| CA0245 | 1.0 | 1.0 | 1.1 | POL5       | 1892763..1 DNA polymerase V (by             | orf19.1304  | 17372 IPF19082   | No significant S.c. match                                                                                |
| CA0246 | 0.9 | 1.0 | 1.0 | IPF14452.f | 1896228..1 F1-ATPase epsilon subunit (by ho |             | 17243 CaPOL5     | CLASSIFIC nucleotidyltransferase activity                                                                |
| CA0247 | 1.1 | 1.1 | 1.1 | RIB21      | 1900939..1 DRAP deaminase (by               | lorf19.2788 | 7263 IPF14452.r  | No significant S.c. match                                                                                |
| CA0248 | 1.3 | 1.0 | 1.2 | IPF7262    | complemer unknown function                  | orf19.2789  | 7262 CaRIB21     | Metabolism of vitamins cofactors and prosthetic groups                                                   |
| CA0249 | 0.9 | 0.9 | 0.8 | IPF19617   | 1906767..1 unknown function                 | orf19.1350  | 19617 IPF7262    | No significant S.c. match                                                                                |
| CA0250 | 1.0 | 0.9 | 0.9 | IPF17661   | complemer unknown function                  | orf19.1348  | 17661 IPF19617   | No significant S.c. match                                                                                |
| CA0251 | 0.9 | 1.0 | 1.0 | IPF9146    | complemer unknown function                  | orf19.1362  | 9146 IPF17661    | No significant S.c. match                                                                                |
| CA0252 | 1.2 | 1.1 | 1.1 | SBP1.5EO   | complemer RNA binding protein-lik           | orf19.1327  | 19078 IPF9146    | No significant S.c. match                                                                                |
| CA0253 | 0.9 | 0.9 | 1.0 | FIL1       | 1921259..1 Putative mitochondrial           | orf19.477   | 7101 CaSBP1.5    | No significant S.c. match                                                                                |
| CA0254 | 0.9 | 1.0 | 1.0 | IPF14968   | 1939294..1 unknown function                 | orf19.3461  | 14968 CaFIL1     | PROTEIN :translation regulator activity                                                                  |
| CA0255 | 0.9 | 0.8 | 0.8 | IPF16558.c | 1941150..1 putative transcription ir        | orf19.735   | 16558 IPF14968   | No significant S.c. match                                                                                |
| CA0256 | 1.0 | 1.1 | 1.0 | IPF10309   | 1948932..1 unknown function                 | orf19.2278  | 10309 IPF16558.c | CELL CYCLE AND DNA PROCESSING TRANSCRIPTION SUBCELLULAR LOCALISATION                                     |
| CA0257 | 1.0 | 0.9 | 1.0 | IPF10079   | complemer unknown function                  | orf19.2280  | 10084 IPF10309   | UNCLASSI molecular_function unknown                                                                      |
| CA0258 | 1.1 | 1.0 | 1.0 | IPF17112   | 1962316..1 thiosulfate sulfurtransf         | orf19.1356  | 17112 IPF10079   | C-compound and carbohydrate metabolism ENERGY TRANSCRIPTION SUBCELLULAR LOCALISATION                     |
| CA0259 | 1.0 | 0.7 | 1.0 | SOL1       | complemer multicopy suppressor              | orf19.1355  | 17111 IPF17112   | Nitrogen ar transferase activity                                                                         |
| CA0260 | 0.9 | 0.8 | 1.0 | IPF13683   | 1973066..1 unknown function                 | orf19.2547  | 13683 CaSOL1     | TRANSCR molecular_function unknown                                                                       |
| CA0261 | 1.0 | 1.0 | 1.0 | LYS22      | 1981734..1 Homocitrate synthase             | orf19.8394  | 3880 IPF13683    | No significant S.c. match                                                                                |
| CA0262 | 1.3 | 1.3 | 1.1 | IPF20054   | 1986390..1 unknown function                 | orf19.1407  | 20054 CaLYS22    | Amino acid transferase activity                                                                          |
| CA0263 | 1.7 | 1.4 | 1.2 | GLK1       | complemer aldohexose specific gl            | orf19.1408  | 8388 IPF20054    | UNCLASSI molecular_function unknown                                                                      |
| CA0264 | 0.9 | 1.0 | 1.0 | IPF8434    | 1992595..1 unknown function                 |             | 8434 CaGLK1      | C-compour transferase activity                                                                           |
| CA0265 | 1.1 | 1.3 | 0.8 | ST11       | 2002146..2 stress-induced protein           | orf19.1070  | 9198 IPF8434     | No significant S.c. match                                                                                |
| CA0266 | 0.9 | 1.1 | 1.0 | IPF17773   | complemer unknown function                  |             | 17773 CaST11     | CELL RES chaperone activity                                                                              |
| CA0267 | 0.9 | 0.8 | 1.0 | IPF12262   | 2020672..2 extracellular alpha-1,4-         | orf19.9183  | 12262 IPF17773   | No significant S.c. match                                                                                |
| CA0268 | 0.8 | 0.8 | 0.7 | PUF2.EXO   | complemer RNA-binding protein, e            | orf19.4262  | 15191 IPF12262   | No significant S.c. match                                                                                |
| CA0269 | 1.0 | 1.0 | 1.0 | PUF2.EXO   | complemer RNA-binding protein (t            | orf19.4263  | 15189 CaPUF2.e)  | CELL CYC RNA binding                                                                                     |
| CA0270 | 1.1 | 1.4 | 1.1 | PRB2       | complemer Protease B, vacuolar (l           | orf19.9783  | 12896 CaPUF2.e)  | No significant S.c. match                                                                                |
| CA0271 | 1.0 | 1.1 | 1.0 | IPF12897   | complemer putative oxidoreductas            | orf19.9785  | 12897 CaPRB2     | PROTEIN FATE [folding modification destination] ""SUBCELLULAR LOCALISATION                               |
| CA0272 | 1.0 | 1.1 | 1.1 | DPB11      | complemer DNA polymerase II cor             | orf19.1434  | 17695 IPF12897   | C-compound and carbohydrate metabolism                                                                   |
| CA0273 | 1.0 | 1.0 | 0.9 | IPF19066   | 2039965..2 unknown function                 | orf19.1433  | 19066 CaDPB11    | CELL CYC nucleotidyltransferase activity                                                                 |
| CA0274 | 1.9 | 1.4 | 1.3 | IPF15153   | 2045228..2 unknown function                 | orf19.1328  | 15153 IPF19066   | UNCLASSIFIED PROTEINS                                                                                    |
| CA0275 | 1.1 | 1.0 | 1.1 | NTA1       | complemer Amino-terminal amidas             | orf19.8470  | 14821 IPF15153   | CELL RESCUE DEFENSE AND VIRULENCE ""SUBCELLULAR LOCALISATION                                             |
| CA0276 | 1.0 | 1.0 | 1.0 | IPF15015   | 2056178..2 unknown function                 | orf19.1305  | 15015 CaNTA1     | PROTEIN I hydrolase activity                                                                             |
| CA0277 | 1.8 | 1.2 | 2.0 | RNH1       | 2059216..2 ribonuclease H (by hor           | orf19.1305  | 12328 IPF15015   | No significant S.c. match                                                                                |
| CA0278 | 1.0 | 0.9 | 1.1 | IPF15772   | complemer unknown function                  |             | 15772 CaRNH1     | Nucleotide metabolism CONTROL OF CELLULAR ORGANIZATION                                                   |
| CA0279 | 1.1 | 1.0 | 0.9 | IPF10568   | 2076229..2 unknown function                 | orf19.1440  | 10568 IPF15772   | No significant S.c. match                                                                                |
| CA0280 | 1.0 | 1.0 | 1.0 | IPF10566   | 2078226..2 unknown function                 | orf19.1439  | 10566 IPF10568   | No significant S.c. match                                                                                |
| CA0281 | 0.9 | 1.0 | 0.9 | IPF10564.c | complemer unknown function, 3-pr            | orf19.1438  | 10565 IPF10566   | CELLULAF transferase activity                                                                            |
| CA0282 | 0.9 | 1.0 | 1.0 | IPF17417   | 2086004..2 Unknown function                 | orf19.1216  | 17417 IPF10564.c | No significant S.c. match                                                                                |
| CA0283 | 1.0 | 1.1 | 1.1 | IPF18034   | 2087607..2 Unknown function                 |             | 18034 IPF17417   | CELL RESCUE DEFENSE AND VIRULENCE ""SUBCELLULAR LOCALISATION TRANSPORT FACILITATION UNCLASSIFIED PROTEI  |
| CA0284 | 1.0 | 1.1 | 0.9 | IPF14657   | 2093067..2 unknown function                 | orf19.1441  | 14657 IPF18034   | UNCLASSIFIED PROTEINS                                                                                    |
| CA0285 | 1.1 | 0.9 | 1.0 | IPF14392   | 2100169..2 unknown function                 | orf19.1535  | 14392 IPF14657   | No significant S.c. match                                                                                |
| CA0286 | 0.6 | 0.9 | 0.3 | IPF14618   | complemer unknown function                  | orf19.6079  | 14618 IPF14392   | No significant S.c. match                                                                                |
| CA0287 | 0.9 | 1.0 | 0.9 | IPF14615   | 2105364..2 unknown function                 | orf19.6080  | 14615 IPF14618   | No significant S.c. match                                                                                |
| CA0288 | 1.0 | 1.0 | 1.1 | IPF14614   | 2107184..2 unknown function                 |             | 14614 IPF14615   | CELL CYCLE AND DNA PROCESSING                                                                            |
| CA0289 | 1.1 | 1.1 | 1.2 | IPF13333   | complemer unknown function                  | orf19.1590  | 13333 IPF14614   | No significant S.c. match                                                                                |
| CA0290 | 1.0 | 0.9 | 1.1 | POT14      | complemer acetyl-CoA acetyltrans            | orf19.1591  | 13331 IPF13333   | No significant S.c. match                                                                                |
| CA0291 | 0.9 | 1.0 | 1.1 | IPF13328   | 2112387..2 unknown function                 | orf19.1592  | 13328 CaPOT14    | Lipid fatty- $\alpha$ transferase activity                                                               |
| CA0292 | 1.1 | 1.0 | 1.0 | IPF19855   | complemer unknown function                  | orf19.1384  | 19855 IPF13328   | UNCLASSI molecular_function unknown                                                                      |
| CA0293 | 1.2 | 0.9 | 1.1 | IPF6624    | complemer unknown function                  | orf19.6489  | 6624 IPF19855    | No significant S.c. match                                                                                |
| CA0294 | 1.0 | 1.0 | 0.9 | IPF16061   | 2125621..2 unknown function                 | orf19.9322  | 16061 IPF6624    | UNCLASSI molecular_function unknown                                                                      |

|        |     |     |     |            |                                               |            |        |                        |                                                                                                          |
|--------|-----|-----|-----|------------|-----------------------------------------------|------------|--------|------------------------|----------------------------------------------------------------------------------------------------------|
| CA0295 | 1.0 | 1.0 | 0.9 | IPF15033   | complemer unknown function                    | orf19.1595 | 15033  | IPF16061               | UNCLASSI isomerase activity                                                                              |
| CA0296 | 1.0 | 0.9 | 1.0 | IFA11      | complemer Unknown function                    | orf19.1596 | 15031  | IPF15033               | UNCLASSI molecular_function unknown                                                                      |
| CA0297 | 1.1 | 1.0 | 1.0 | CDC53      | 2137417..2 Cell division control pr           | orf19.1674 | 14223  | CaIFA11                | Nucleotide metabolism CELL CYCLE AND DNA PROCESSING CELLULAR COMMUNICATION/SIGNAL TRANSDUCTION MECHANISM |
| CA0298 | 1.0 | 1.0 | 1.0 | PPT1       | complemer Protein ser/thr phosph              | orf19.1673 | 14222  | CaCDC53                | Amino acid structural molecule activity                                                                  |
| CA0299 | 1.0 | 0.9 | 1.0 | IPF3765    | 2142629..2 unknown function                   | orf19.1597 | 3765   | CaPPT1                 | CLASSIFIC protein phosphatase activity                                                                   |
| CA0300 | 0.9 | 0.9 | 1.0 | ERG24      | complemer C-14 sterol reductase (orf19.1598   |            | 3764   | IPF3765                | UNCLASSI molecular_function unknown                                                                      |
| CA0301 | 1.1 | 1.0 | 1.0 | IPF19688   | complemer unknown function                    | orf19.1606 | 19688  | CaERG24                | Lipid fatty-ε oxidoreductase activity                                                                    |
| CA0302 | 0.9 | 0.9 | 1.2 | MEP3       | 2164073..2 low affinity high capaci           | orf19.9181 | 12620  | IPF19688               | No significant S.c. match                                                                                |
| CA0303 | 1.1 | 0.9 | 1.0 | IPF17507   | complemer putative glutathione S-             | orf19.8339 | 17507  | CaMEP3                 | TRANSPO transporter activity                                                                             |
| CA0304 | 1.0 | 1.1 | 1.0 | IPF12829   | complemer unknown function                    | orf19.8340 | 12829  | IPF17507               | Nitrogen and sulphur metabolism                                                                          |
| CA0305 | 1.1 | 1.1 | 1.0 | INO80      | 2176470..2 DNA helicase (by hom               | orf19.1734 | 13578  | IPF12829               | UNCLASSI molecular_function unknown                                                                      |
| CA0306 | 0.9 | 1.0 | 0.9 | HEM3       | 2181626..2 porphobilinogen deami              | orf19.1742 | 15629  | CaINO80                | TRANSCR hydrolase activity                                                                               |
| CA0307 | 1.0 | 1.0 | 1.0 | IPF4719    | complemer similar to Saccharomy               | orf19.3736 | 4719   | CaHEM3                 | Metabolism transferase activity                                                                          |
| CA0308 | 1.1 | 1.1 | 1.0 | RHK1       | complemer Mannosyltransferase (lorf19.8693    |            | 17442  | IPF4719                | CELL CYC transcription regulator activity                                                                |
| CA0309 | 1.1 | 1.1 | 1.0 | IPF16935   | complemer unknown function                    | orf19.1091 | 16935  | CaRHK1                 | C-compour transferase activity                                                                           |
| CA0310 | 1.0 | 1.0 | 0.8 | PEX11      | complemer peroxisomal membran                 | orf19.8690 | 19049  | IPF16935               | PROTEIN I molecular_function unknown                                                                     |
| CA0311 | 0.9 | 1.0 | 1.0 | DAK2.3EO   | 2199549..2 dihydroxyacetone kinase, 3-prime   |            | 19048  | CaPEX11                | SUBCELLI molecular_function unknown                                                                      |
| CA0312 | 1.0 | 1.0 | 1.0 | IPF6396    | complemer unknown function                    | orf19.8211 | 6396   | CaDAK2.3e              | C-compound and carbohydrate metabolism ""CELL RESCUE DEFENSE AND VIRULENCE ""                            |
| CA0315 | 0.9 | 0.9 | 0.8 | ALS9.5EO   | complemer agglutinin-like protein, orf19.5742 |            | 19856  | IPF6396                | UNCLASSI molecular_function unknown                                                                      |
| CA0316 | 1.0 | 1.1 | 0.9 | ALS1.3EO   | complemer agglutinin-like protein, orf19.5741 |            | 13002  | CaALS9.5e              | SUBCELLULAR LOCALISATION Other virulence attributes                                                      |
| CA0317 | 1.1 | 1.1 | 1.0 | SSD1       | 2223396..2 Protein phosphatase (torf19.3959   |            | 5791   | CaALS1.3e              | SUBCELLULAR LOCALISATION Other virulence attributes                                                      |
| CA0318 | 1.0 | 1.0 | 1.0 | FOL2       | 2227680..2 GTP cyclohydrolase (b              | orf19.3957 | 5793   | CaSSD1                 | CELL CYC RNA binding                                                                                     |
| CA0319 | 1.0 | 1.0 | 1.0 | IPF15244.: | complemer unknown function, 3-prime end       |            | 19858  | CaFOL2                 | Metabolism hydrolase activity                                                                            |
| CA0321 | 1.1 | 1.0 | 1.1 | APL2       | 2234514..2 AP-1 complex subunit, orf19.7861   |            | 15242  | IPF15244.:             | No significant S.c. match                                                                                |
| CA0322 | 1.0 | 1.1 | 1.0 | RPS9B      | 2242781..2 Ribosomal protein                  | orf19.8459 | 3402   | CaAPL2                 | PROTEIN I protein binding                                                                                |
| CA0323 | 1.2 | 1.1 | 1.1 | CDC95      | 2245800..2 translation initiation fac         | orf19.9378 | 12555  | CaRPS9B                | PROTEIN I structural molecule activity                                                                   |
| CA0324 | 1.0 | 1.1 | 0.9 | STT4       | 2247127..2 Phosphatidylinositol-4-            | orf19.9377 | 14337  | CaCDC95                | PROTEIN I molecular_function unknown                                                                     |
| CA0325 | 1.1 | 1.1 | 1.1 | IPF15222   | complemer Unknown function                    | orf19.3781 | 15222  | CaSTT4                 | Lipid fatty-ε transferase activity                                                                       |
| CA0326 | 0.9 | 1.0 | 1.0 | IPF15220   | 2255216..2 Unknown function                   | orf19.3780 | 15220  | IPF15222               | UNCLASSIFIED PROTEINS                                                                                    |
| CA0327 | 1.0 | 1.0 | 0.9 | IPF15217.: | 2256723..2 WD-repeat protein, 5-φ             | orf19.3779 | 15219  | IPF15220               | No significant S.c. match                                                                                |
| CA0328 | 1.0 | 1.0 | 1.1 | IPF15217.: | 2257498..2 WD-repeat protein, 3-φ             | orf19.3778 | 15217  | IPF15217.:             | SUBCELLULAR LOCALISATION                                                                                 |
| CA0329 | 1.0 | 1.0 | 1.0 | IMG2       | 2258435..2 Required for Integrity c           | orf19.3777 | 15216  | IPF15217.:             | SUBCELLI molecular_function unknown                                                                      |
| CA0330 | 0.9 | 0.6 | 1.2 | BAT21      | complemer branched-chain amino                | orf19.797  | 5075   | CaIMG2                 | CONTROL structural molecule activity                                                                     |
| CA0331 | 1.1 | 1.0 | 1.0 | ANC1       | 2264913..2 TFIIIF subunit, transcri           | orf19.798  | 5074   | CaBAT21                | Amino acid transferase activity                                                                          |
| CA0332 | 0.9 | 0.9 | 0.8 | FEN2       | 2271840..2 allantate permease tr              | orf19.1298 | 14381  | CaANC1                 | Phosphate transcription regulator activity                                                               |
| CA0334 | 0.9 | 0.9 | 0.9 | IPF19562   | complemer unknown function                    | orf19.7824 | 19562  | CaFEN2                 | Amino acid transporter activity                                                                          |
| CA0335 | 1.1 | 1.1 | 1.1 | IFA2       | 2277979..2 unknown function                   | orf19.7825 | 16389  | IPF19562               | No significant S.c. match                                                                                |
| CA0336 | 1.0 | 0.9 | 1.0 | IPF9869    | 2284147..2 unknown function                   | orf19.1371 | 9869   | CaIFA2                 | Nucleotide metabolism CELL CYCLE AND DNA PROCESSING CELLULAR COMMUNICATION/SIGNAL TRANSDUCTION MECHANISM |
| CA0337 | 0.9 | 1.1 | 0.9 | IPF9867    | complemer unknown function                    | orf19.1370 | 9867   | IPF9869                | TRANSCRIPTION SUBCELLULAR LOCALISATION                                                                   |
| CA0338 | 0.9 | 1.0 | 0.9 | IPF13252   | 2291654..2 unknown function                   | orf19.3378 | 13252  | IPF9867                | No significant S.c. match                                                                                |
| CA0339 | 1.0 | 0.9 | 0.9 | IPF13247   | 2293360..2 unknown function                   | orf19.3376 | 13247  | IPF13252               | No significant S.c. match                                                                                |
| CA0340 | 1.0 | 0.9 | 0.9 | IPF19859   | 2295931..2 unknown function                   | orf19.3375 | 19859  | IPF13247               | No significant S.c. match                                                                                |
| CA0341 | 1.0 | 1.3 | 1.1 | XKS1       | 2298575..2 xylulokinase (by homol             | orf19.1788 | 10472  | IPF19859               | No significant S.c. match                                                                                |
| CA0342 | 0.9 | 0.9 | 1.0 | IPF10470   | 2300711..2 unknown function                   | orf19.1789 | 10470  | CaXKS1                 | C-compour transferase activity                                                                           |
| CA0343 | 1.0 | 0.9 | 1.0 | LYS1.5EO   | 2302869..2 saccharopine dehydrogenase, 5-φ    |            | 10469  | IPF10470               | UNCLASSI molecular_function unknown                                                                      |
| CA0344 | 1.0 | 1.1 | 1.1 | IFF1.3EO   | complemer Unknown function, 3-φ               | orf19.1346 | 16164  | CaLYS1.5e              | Amino acid oxidoreductase activity                                                                       |
| CA0345 | 1.3 | 1.3 | 1.1 | ACH1       | complemer acetyl-coenzyme-A hyc               | orf19.1068 | 12009  | CaFF1.3e               | No significant S.c. match                                                                                |
| CA0346 | 1.2 | 2.1 | 1.4 | ROX1       | 2327367..2 Possible heme-depenc               | orf19.1034 | 19029  | CaACH1                 | Lipid fatty-ε hydrolase activity                                                                         |
| CA0347 |     |     |     | FOX2       | 2337294..2340014                              |            | CaROX1 | Metabolism DNA binding |                                                                                                          |
| CA0348 | 0.9 | 0.9 | 1.0 | IFK1       | complemer probable monooxygena                | orf19.9098 | 15750  |                        |                                                                                                          |
| CA0349 | 1.0 | 0.9 | 1.2 | IPF19026   | complemer unknown function                    | orf19.1813 | 19026  | CaIFK1                 | No significant S.c. match                                                                                |
| CA0350 | 0.9 | 1.0 | 1.0 | SNU114     | complemer snRNP-specific protein              | orf19.7784 | 16740  | IPF19026               | UNCLASSI molecular_function unknown                                                                      |
| CA0351 | 1.0 | 0.9 | 1.0 | RPB4.3F    | complemer DNA-directed RNA pol                | orf19.145  | 19621  | CaSNU114               | PROTEIN I RNA binding/helicase activity                                                                  |
| CA0352 | 1.0 | 0.9 | 0.8 | RPB4.5F    | complemer DNA-directed RNA pol                | orf19.146  | 19620  | CaRPB4.3f              | TRANSCR nucleotidyltransferase activity                                                                  |
| CA0353 | 0.9 | 1.0 | 1.0 | YAK1.3F    | complemer serine/threonine protei             | orf19.147  | 16043  | CaRPB4.5f              | TRANSCRIPTION ""CELL RESCUE DEFENSE AND VIRULENCE ""SUBCELLULAR LOCALISATION                             |
| CA0354 | 1.0 | 1.2 | 1.0 | YAK1.5F    | complemer serine/threonine protei             | orf19.7788 | 16042  | CaYAK1.3f              | CELL CYC protein kinase activity                                                                         |
| CA0355 | 0.9 | 0.7 | 0.9 | IPF2535    | complemer unknown function                    | orf19.1395 | 2535   | CaYAK1.5f              | No significant S.c. match                                                                                |
| CA0356 | 0.9 | 1.0 | 1.0 | IPF2532    | 2378711..2 unknown function                   | orf19.1395 | 2532   | IPF2535                | No significant S.c. match                                                                                |
| CA0357 | 1.2 | 1.2 | 1.2 | FCY22      | complemer purine-cytosine perme               | orf19.333  | 12764  | IPF2532                | UNCLASSI molecular_function unknown                                                                      |
| CA0358 | 0.9 | 0.8 | 1.0 | IPF17488.: | 2397615..2 unknown function, 5-φ              | orf19.1818 | 17488  | CaFCY22                | Nucleotide transporter activity                                                                          |
| CA0359 | 1.0 | 1.0 | 1.0 | IPF17488.: | 2398456..2 unknown function, 3-φ              | orf19.1820 | 17489  | IPF17488.:             | No significant S.c. match                                                                                |
| CA0360 | 1.0 | 1.0 | 1.0 | IPF2328    | complemer unknown function                    | orf19.8720 | 2328   | IPF17488.:             | No significant S.c. match                                                                                |
| CA0361 | 0.9 | 0.8 | 0.9 | IPF2326    | 2404599..2 unknown function                   | orf19.1124 | 2326   | IPF2328                | No significant S.c. match                                                                                |
| CA0362 | 0.7 | 0.6 | 1.2 | TEF1       | complemer translation elongation f            | orf19.9009 | 9732   | IPF2326                | No significant S.c. match                                                                                |
| CA0363 | 1.0 | 1.0 | 1.1 | SPR3       | 2414124..2 sporulation-specific se            | orf19.1524 | 16732  | CaTEF1                 | PROTEIN I translation regulator activity                                                                 |
| CA0364 | 1.0 | 1.0 | 1.0 | IPF15983   | 2416756..2 unknown function                   | orf19.1525 | 15983  | CaSPR3                 | CELL FATE SUBCELLULAR LOCALISATION                                                                       |
| CA0365 | 1.0 | 0.9 | 1.0 | IPF15177   | complemer Unknown function                    | orf19.750  | 15177  | IPF15983               | Nucleotide molecular_function unknown                                                                    |
| CA0366 | 1.0 | 1.0 | 1.0 | IPF19017   | 2443661..2 unknown function                   | orf19.8931 | 19017  | IPF15177               | No significant S.c. match                                                                                |
| CA0367 | 1.1 | 0.9 | 1.0 | TIM22      | complemer Mitochondrial import in             | orf19.1352 | 16416  | IPF19017               | No significant S.c. match                                                                                |
| CA0368 | 0.9 | 1.3 | 0.8 | IPF11646   | 2446413..2 unknown function                   | orf19.1353 | 11646  | CaTIM22                | PROTEIN I transporter activity                                                                           |
| CA0369 | 1.0 | 1.1 | 1.0 | IPF13675   | complemer unknown function                    | orf19.1656 | 13675  | IPF11646               | No significant S.c. match                                                                                |
| CA0370 | 1.1 | 1.2 | 1.2 | IPF13678   | complemer unknown function                    |            | 13678  | IPF13675               | UNCLASSIFIED PROTEINS                                                                                    |

|        |     |     |     |            |                                         |                |       |            |                                                              |                                                                                           |                                                                         |
|--------|-----|-----|-----|------------|-----------------------------------------|----------------|-------|------------|--------------------------------------------------------------|-------------------------------------------------------------------------------------------|-------------------------------------------------------------------------|
| CA0371 | 1.0 | 1.0 | 1.0 | IPF19578   | complemer unknown function              | orf19.1087     | 19578 | IPF13678   | CLASSIFIC                                                    | molecular_function                                                                        | unknown                                                                 |
| CA0372 | 1.1 | 1.1 | 1.0 | IPF10062   | complemer unknown function              | orf19.1086     | 10062 | IPF19578   | No significant S.c. match                                    |                                                                                           |                                                                         |
| CA0373 | 1.0 | 0.9 | 1.0 | IPF7655.5f | complemer unknown function, 5-prime end |                | 7655  | IPF10062   | UNCLASSI                                                     | molecular_function                                                                        | unknown                                                                 |
| CA0374 | 0.9 | 1.1 | 0.9 | IFK3       | complemer Probable monooxygen           | orf19.8477     | 7651  | IPF7655.5e | No significant S.c. match                                    |                                                                                           |                                                                         |
| CA0375 | 1.1 | 1.5 | 1.2 | CRH11      | 2480849..2 Probable membrane p          | orf19.2706     | 14360 | CaIFK3     | No significant S.c. match                                    |                                                                                           |                                                                         |
| CA0376 | 1.1 | 1.2 | 1.2 | QCR9       | 2482622..2 ubiquinol--cytochrome-c      | reductase      | 14357 | CaCRH11    | SUBCELLU                                                     | molecular_function                                                                        | unknown                                                                 |
| CA0377 | 0.9 | 0.9 | 0.7 | IPF14356   | 2483232..2 unknown function             | orf19.2708     | 14356 | CaQCR9     | ENERGY                                                       | transporter activity, oxidoreductase activity                                             |                                                                         |
| CA0378 | 1.0 | 1.1 | 1.0 | IPF3178    | complemer Unknown function              | orf19.3170     | 3178  | IPF14356   | UNCLASSI                                                     | molecular_function                                                                        | unknown                                                                 |
| CA0379 | 1.0 | 1.0 | 1.0 | SSP120     | 2494755..2 secretory protein (by h      | orf19.3173     | 12012 | IPF3178    | UNCLASSI                                                     | molecular_function                                                                        | unknown                                                                 |
| CA0380 | 0.8 | 0.8 | 0.8 | IPF14109   | 2512372..2 unknown function             | orf19.2451     | 14109 | CaSSP120   | CELLULAF                                                     | molecular_function                                                                        | unknown                                                                 |
| CA0381 | 0.8 | 0.9 | 0.7 | IPF16047   | complemer unknown function              | orf19.2825     | 16047 | IPF14109   | No significant S.c. match                                    |                                                                                           |                                                                         |
| CA0382 | 1.0 | 1.0 | 1.0 | IPF16030   | 2528963..2 similar to Saccharomy        | orf19.1842     | 16030 | IPF16047   | UNCLASSI                                                     | molecular_function                                                                        | unknown                                                                 |
| CA0383 | 0.9 | 0.8 | 1.0 | IPF16028   | 2533990..2 unknown function             | orf19.1841     | 16028 | IPF16030   | CELL FAT                                                     | signal transducer activity                                                                |                                                                         |
| CA0384 | 0.9 | 1.1 | 0.8 | PCL1       | 2549651..2 cyclin, G1/S-specific        | (t orf19.1017; | 16634 | IPF16028   | Lipid fatty-acid and isoprenoid metabolism                   | ""CELL CYCLE AND DNA PROCESSING PROTEIN SYNTHESIS CELLULAR COMMUNICATI                    |                                                                         |
| CA0385 | 1.1 | 1.0 | 0.9 | IPF4071    | complemer unknown function              | orf19.1861     | 4071  | CaPCL1     | CELL CYC                                                     | protein kinase activity, enzyme regulator activity                                        |                                                                         |
| CA0386 | 1.6 | 1.6 | 1.2 | IPF4065    | 2557981..2 unknown function             | orf19.1862     | 4065  | IPF4071    | CELL CYCLE AND DNA PROCESSING                                | SUBCELLULAR LOCALISATION                                                                  |                                                                         |
| CA0387 | 1.2 | 1.1 | 1.1 | IPF10318.f | complemer unknown function, 5-prime end |                | 14475 | IPF4065    | UNCLASSI                                                     | molecular_function                                                                        | unknown                                                                 |
| CA0388 | 0.8 | 0.9 | 0.8 | IPF14468   | 2564217..2 unknown function             | orf19.1907     | 14468 | IPF10318.f | No significant S.c. match                                    |                                                                                           |                                                                         |
| CA0389 | 1.1 | 1.1 | 1.1 | IPF14465   | complemer unknown function              | orf19.1910     | 14465 | IPF14468   | UNCLASSI                                                     | molecular_function                                                                        | unknown                                                                 |
| CA0390 | 1.0 | 1.0 | 0.9 | DCG1       | complemer involved in nitrogen-ca       | orf19.244      | 10499 | IPF14465   | No significant S.c. match                                    |                                                                                           |                                                                         |
| CA0391 | 1.0 | 1.0 | 1.0 | DDC1       | 2572793..2 DNA damage checkpo           | orf19.7875     | 10496 | CaDCG1     | Nitrogen ar                                                  | molecular_function                                                                        | unknown                                                                 |
| CA0393 | 1.1 | 0.9 | 1.0 | IPF12758.c | complemer unknown function, 3-prime end |                | 12759 | CaDDC1     | CELL CYC                                                     | molecular_function                                                                        | unknown                                                                 |
| CA0394 | 1.1 | 1.0 | 1.2 | IPF12758.f | complemer unknown function, 5-pr        | orf19.7966     | 12758 | IPF12758.f | No significant S.c. match                                    |                                                                                           |                                                                         |
| CA0395 | 1.0 | 1.0 | 1.0 | SEF11.5E   | complemer Putative transcription f      | orf19.1926     | 15112 | IPF12758.f | No significant S.c. match                                    |                                                                                           |                                                                         |
| CA0396 | 0.9 | 1.1 | 1.0 | SNM1       | 2596774..2 RNA binding protein of       | orf19.1927     | 15109 | CaSEF11.f  | TRANSCRIPTION                                                | CELL FATE SUBCELLULAR LOCALISATION                                                        |                                                                         |
| CA0397 | 1.1 | 1.1 | 1.1 | FRE31      | complemer Ferric reductase (by h        | orf19.1930     | 15107 | CaSNM1     | No significant S.c. match                                    |                                                                                           |                                                                         |
| CA0398 | 1.1 | 1.3 | 1.1 | ARO2       | 2602824..2 chorismate synthase          | (t orf19.1986  | 14673 | CaFRE31    | REGULATI                                                     | oxidoreductase activity                                                                   |                                                                         |
| CA0399 | 1.1 | 1.0 | 1.1 | CDC45      | complemer Chromosomal DNA re            | orf19.1988     | 14671 | CaARO2     | Amino acid lyase activity                                    |                                                                                           |                                                                         |
| CA0400 | 1.0 | 1.0 | 1.0 | IPF7423.3f | 2608466..2 similar to Saccharomy        | orf19.6223     | 11910 | CaCDC45    | CELL CYC                                                     | DNA binding                                                                               |                                                                         |
| CA0401 | 0.9 | 0.9 | 0.9 | RTA1       | complemer unknown function              | orf19.6224     | 11914 | IPF7423.3e | CELL FATE                                                    |                                                                                           |                                                                         |
| CA0402 | 0.9 | 0.7 | 0.9 | IPF15225   | complemer Sorting nexin-like prote      | orf19.1990     | 15225 | CaRTA1     | UNCLASSIFIED                                                 | PROTEINS                                                                                  |                                                                         |
| CA0403 | 1.1 | 1.1 | 1.1 | IPF15224   | complemer unknown function              | orf19.1989     | 15224 | IPF15225   | PROTEIN FATE                                                 | [folding modification destination]                                                        |                                                                         |
| CA0404 | 1.0 | 1.0 | 1.0 | LYS14      | 2624704..2 transcription factor inv     | orf19.5548     | 14435 | IPF15224   | UNCLASSI                                                     | molecular_function                                                                        | unknown                                                                 |
| CA0405 | 0.9 | 1.0 | 0.9 | IPF19862.c | complemer unknown function, 3-pr        | orf19.1299     | 19861 | CaLYS14    | Amino acid transcription regulator activity                  |                                                                                           |                                                                         |
| CA0407 |     |     |     | SAC6.3F    | complement(2627330..2627737)            |                |       | IPF19862.f | No significant S.c. match                                    |                                                                                           |                                                                         |
| CA0408 | 1.3 | 1.5 | 1.2 | SAC6.5F    | complemer actin filament bundling       | orf19.5544     | 8093  |            |                                                              |                                                                                           |                                                                         |
| CA0409 | 0.9 | 0.9 | 1.0 | PHO80      | 2633763..2 Cyclin (by homology)         | orf19.5755     | 15067 | CaSAC6.5f  | CELLULAF                                                     | protein binding                                                                           |                                                                         |
| CA0410 | 1.1 | 1.0 | 1.1 | IPF15065   | complemer unknown function              | orf19.1318     | 15065 | CaPHO80    | Phosphate protein kinase activity, enzyme regulator activity |                                                                                           |                                                                         |
| CA0411 | 1.0 | 0.9 | 0.9 | IPF17676   | 2640129..2 similar to Saccharomy        | orf19.1507     | 17676 | IPF15065   | UNCLASSI                                                     | molecular_function                                                                        | unknown                                                                 |
| CA0413 | 1.0 | 1.2 | 1.2 | ALS2       | 2649386..2 agglutinin-like protein,     | orf19.2122     | 18994 | IPF17676   | SUBCELLU                                                     | protein binding                                                                           |                                                                         |
| CA0414 | 1.1 | 1.0 | 1.1 | IPF4068    | complemer reverse transcriptase         | orf19.2164     | 4068  | CaALS2     | Other virulence attributes                                   |                                                                                           |                                                                         |
| CA0415 | 0.6 | 0.7 | 0.4 | FRP3       | 2666833..2 member of the FRP fa         | orf19.1224     | 16160 | IPF4068    | No significant S.c. match                                    |                                                                                           |                                                                         |
| CA0416 | 1.0 | 1.0 | 0.9 | IPF17492   | complemer unknown function              | orf19.1225     | 17492 | CaFRP3     | C-compour                                                    | transporter activity                                                                      |                                                                         |
| CA0417 | 1.2 | 1.4 | 1.1 | UBC13      | 2678425..2 E2 ubiquitin-conjugat        | orf19.2225     | 6529  | IPF17492   | No significant S.c. match                                    |                                                                                           |                                                                         |
| CA0418 | 1.0 | 1.0 | 1.0 | IPF9051.5f | complemer unknown function, 5-pr        | orf19.2227     | 9051  | CaUBC13    | PROTEIN FATE                                                 | [folding modification destination]                                                        |                                                                         |
| CA0419 | 1.0 | 1.0 | 0.9 | IPF19864   | 2683154..2 unknown function             | orf19.2228     | 19864 | IPF9051.5e | CELL CYCLE AND DNA PROCESSING                                | ""PROTEIN FATE [folding modification destination] ""CONTROL OF CELLULAR ORGANIZATION      |                                                                         |
| CA0420 | 0.8 | 1.0 | 0.9 | IPF9048    | complemer unknown function              | orf19.2229     | 9048  | IPF19864   | CELL FAT                                                     | protein binding                                                                           |                                                                         |
| CA0421 | 1.0 | 1.0 | 1.0 | IPF9047    | 2686402..2 unknown function             | orf19.2230     | 9047  | IPF9048    | UNCLASSI                                                     | molecular_function                                                                        | unknown                                                                 |
| CA0422 | 0.6 | 0.8 | 0.5 | IPF9046    | complemer unknown function              | orf19.2231     | 9046  | IPF9047    | UNCLASSI                                                     | DNA binding, transcription regulator activity                                             |                                                                         |
| CA0423 | 1.1 | 1.3 | 1.1 | IPF15273   | complemer unknown function              | orf19.9381     | 15273 | IPF9046    | No significant S.c. match                                    |                                                                                           |                                                                         |
| CA0424 | 1.0 | 0.9 | 1.1 | IPF10795   | complemer putative transcription f      | orf19.2356     | 10795 | IPF15273   | Amino acid metabolism                                        | Nitrogen and sulphur metabolism                                                           | ""Lipid fatty-acid and isoprenoid metabolism ""CELL CYCLE AND DNA PROCE |
| CA0425 | 1.0 | 1.1 | 1.1 | PPH21      | 2710813..2 protein ser/thr phosph       | orf19.9252     | 11679 | IPF10795   | TRANSCRIPTION                                                | ""CELL RESCUE DEFENSE AND VIRULENCE ""REGULATION OF/INTERACTION WITH CELLULAR ENVIRONMENT |                                                                         |
| CA0426 | 0.8 | 1.0 | 0.9 | CFT1       | complemer pre-mRNA 3'-end proc          | orf19.2760     | 11996 | CaPPH21    | C-compour                                                    | protein phosphatase activity                                                              |                                                                         |
| CA0427 | 1.0 | 1.0 | 1.0 | IPF11995   | 2720571..2 unknown function             | orf19.2761     | 11995 | CaCFT1     | TRANSCR                                                      | RNA binding                                                                               |                                                                         |
| CA0428 | 1.0 | 1.1 | 1.1 | ILV2       | 2723926..2 acetolactate synthase        | orf19.1613     | 14829 | IPF11995   | Lipid fatty-z                                                | transferase activity                                                                      |                                                                         |
| CA0429 | 1.0 | 1.0 | 1.0 | IPF14827   | complemer unknown function              | orf19.1611     | 14827 | CaILV2     | Amino acid transferase activity                              |                                                                                           |                                                                         |
| CA0430 | 1.3 | 1.4 | 1.3 | PRC1       | complemer Carboxypeptidase Y p          | orf19.1339     | 7928  | IPF14827   | No significant S.c. match                                    |                                                                                           |                                                                         |
| CA0431 | 1.1 | 0.9 | 1.0 | IPF7927    | 2734025..2 putative aldose reduct       | orf19.1340     | 7927  | CaPRC1     | PROTEIN I                                                    | peptidase activity                                                                        |                                                                         |
| CA0432 | 1.0 | 1.0 | 1.0 | IPF7926    | 2735092..2 putative protein kinase      | orf19.1341     | 7926  | IPF7927    | C-compour                                                    | molecular_function                                                                        | unknown                                                                 |
| CA0433 | 1.0 | 1.1 | 1.1 | SHM1       | 2736327..2 Serine hydroxymethyl         | orf19.1342     | 7924  | IPF7926    | CLASSIFICATI                                                 | ON NOT YET CLEAR-CUT                                                                      |                                                                         |
| CA0434 | 1.1 | 1.0 | 1.0 | IPF13577   | complemer unknown function              | orf19.9303     | 13577 | CaSHM1     | Nucleotide transferase activity                              |                                                                                           |                                                                         |
| CA0435 | 1.5 | 1.4 | 2.0 | UGP1       | 2743481..2 UTP--glucose-1-phosp         | orf19.9305     | 15411 | IPF13577   | No significant S.c. match                                    |                                                                                           |                                                                         |
| CA0436 | 1.1 | 1.0 | 1.1 | RBL2       | complemer Beta-tubulin binding protein  | (by ho         | 15412 | CaUGP1     | C-compour                                                    | nucleotidytransferase activity                                                            |                                                                         |
| CA0437 | 1.1 | 1.1 | 1.0 | DIT1       | complemer Spore wall maturation         | orf19.9308     | 15414 | CaRBL2     | CELL CYC                                                     | chaperone activity                                                                        |                                                                         |
| CA0438 | 0.9 | 0.8 | 1.0 | STE4.5EO   | complemer GTP-binding protein b         | orf19.8419     | 19618 | CaDIT1     | CELL FATE                                                    |                                                                                           |                                                                         |
| CA0439 | 0.9 | 0.9 | 0.9 | IPF12478   | 2757659..2 unknown function             | orf19.1301     | 12478 | CaSTE4.5e  | CELLULAF                                                     | hydrolase activity                                                                        |                                                                         |
| CA0440 | 1.0 | 1.1 | 1.1 | IPF12473   | 2759972..2 unknown function             | orf19.5571     | 12473 | IPF12478   | UNCLASSI                                                     | molecular_function                                                                        | unknown                                                                 |
| CA0441 | 0.9 | 1.0 | 1.0 | IPF12472   | complemer unknown function              | orf19.1301     | 12472 | IPF12473   | No significant S.c. match                                    |                                                                                           |                                                                         |
| CA0442 | 0.6 | 0.8 | 0.5 | IFC4       | 2766149..2 unknown function             | orf19.2292     | 12066 | IPF12472   | C-compound and carbohydrate metabolism                       | ""PROTEIN FATE [folding modification destination] ""CONTROL OF CELLULAR ORGANIZATI        |                                                                         |
| CA0443 | 1.0 | 1.0 | 0.9 | SPB1       | complemer Putative methyltransfe        | orf19.7727     | 19691 | CaIFC4     | TRANSPORT                                                    | FACILITATION                                                                              |                                                                         |
| CA0444 | 1.1 | 1.0 | 1.1 | IPF17429.c | complemer similar to Saccharomy         | orf19.775      | 16249 | CaSPB1     | TRANSCR                                                      | transferase activity                                                                      |                                                                         |
| CA0445 | 0.9 | 1.0 | 1.0 | IPF17429.f | complemer similar to Saccharomy         | orf19.7725     | 17429 | IPF17429.f | CELLULAF                                                     | molecular_function                                                                        | unknown                                                                 |

|        |     |     |     |            |                                         |            |            |            |                                                                                                                     |                                                            |
|--------|-----|-----|-----|------------|-----------------------------------------|------------|------------|------------|---------------------------------------------------------------------------------------------------------------------|------------------------------------------------------------|
| CA0446 | 1.0 | 0.9 | 0.8 | IPF14282   | complemer Similar to mucin protei       | orf19.2296 | 14282      | IPF17429.† | UNCLASSIFIED PROTEINS                                                                                               |                                                            |
| CA0447 | 1.1 | 1.0 | 0.9 | IPF14275   | complemer Probable ADP-ribosyla         | orf19.2297 | 14275      | IPF14282   | No significant S.c. match                                                                                           |                                                            |
| CA0448 | 1.8 | 2.5 | 5.4 | ALS10      | 2802350..2 agglutinin like protein      | orf19.2355 | 12997      | IPF14275   | PROTEIN I hydrolase activity                                                                                        |                                                            |
| CA0449 | 1.0 | 1.0 | 0.9 | MOT2.3     | complemer transcriptional repress       | orf19.2379 | 9357       | CaALS10    | CELL FATE SUBCELLULAR LOCALISATION Other virulence attributes                                                       |                                                            |
| CA0450 | 1.0 | 1.0 | 1.1 | IPF9353    | 2818634..2 unknown function             | orf19.2378 | 9353       | CaMOT2.3   | UNCLASSItranscription regulator activity                                                                            |                                                            |
| CA0451 | 1.0 | 1.0 | 1.0 | IPF13556   | 2822970..2 unknown function             | orf19.8882 | 13556      | IPF9353    | TRANSPO molecular_function unknown                                                                                  |                                                            |
| CA0452 | 1.1 | 1.1 | 1.1 | IPF13554   | 2824363..2 Hypothetical acidic pro      | orf19.8881 | 13554      | IPF13556   | No significant S.c. match                                                                                           |                                                            |
| CA0453 | 1.0 | 1.0 | 1.0 | IPF13552   | complemer putative methyltransfer       | orf19.8880 | 13552      | IPF13554   | UNCLASSIFIED PROTEINS                                                                                               |                                                            |
| CA0454 | 1.1 | 1.0 | 1.1 | RPN6       | 2826397..2 subunit of the regulato      | orf19.8879 | 13551      | IPF13552   | UNCLASSItransferase activity                                                                                        |                                                            |
| CA0455 | 1.0 | 0.9 | 1.0 | TCA5A      | 2830521..2 polyprotein of Tca5 ret      | orf19.2427 | 11655      | CaRPN6     | PROTEIN I structural molecule activity                                                                              |                                                            |
| CA0457 | 0.9 | 1.5 | 1.0 | IPF15604   | 2842182..2 transcription factor (by     | orf19.2432 | 15604      | CaTca5a    | UNCLASSIFIED PROTEINS                                                                                               |                                                            |
| CA0458 | 1.1 | 0.9 | 1.0 | IPF15601   | 2843873..2 unknown function             | orf19.2433 | 15601      | IPF15604   | Lipid fatty-ε transcription regulator activity                                                                      |                                                            |
| CA0459 | 1.0 | 0.9 | 1.0 | HOL3       | 2846242..2 member of major facilit      | orf19.2517 | 4969       | IPF15601   | No significant S.c. match                                                                                           |                                                            |
| CA0460 | 1.1 | 1.1 | 1.0 | SEC17      | complemer transport vesicle fusior      | orf19.2518 | 4971       | CaHOL3     | CELL RESCUE DEFENSE AND VIRULENCE ""TRANSPORT FACILITATION                                                          |                                                            |
| CA0461 | 1.0 | 0.9 | 1.0 | IPF4972    | 2849425..2 unknown function             | orf19.2519 | 4972       | CaSEC17    | CELLULAF transporter activity                                                                                       |                                                            |
| CA0462 | 1.0 | 1.1 | 0.9 | MRPS28     | complemer ribosomal protein (by h       | orf19.2520 | 4973       | IPF4972    | CELL CYC molecular_function unknown                                                                                 |                                                            |
| CA0463 | 1.1 | 1.1 | 1.1 | IPF18979   | complemer unknown function              | orf19.7797 | 18979      | CaMRPS28   | PROTEIN I RNA binding                                                                                               |                                                            |
| CA0464 | 0.7 | 0.5 | 0.9 | IPF14116   | 2853561..2 unknown function             | orf19.7798 | 14116      | IPF18979   | Metabolism of vitamins cofactors and prosthetic groups                                                              |                                                            |
| CA0465 | 0.9 | 1.0 | 0.9 | IPF14113   | 2856442..2 unknown function             | orf19.7800 | 14113      | IPF14116   | UNCLASSIhydrolase activity                                                                                          |                                                            |
| CA0466 | 1.0 | 0.9 | 1.0 | URA4       | complemer dihydroorotase (by hor        | orf19.1977 | 8687       | IPF14113   | TRANSCR molecular_function unknown                                                                                  |                                                            |
| CA0467 | 0.8 | 1.0 | 1.0 | TRX2       | complemer thioredoxin (by homolo        | orf19.1976 | 8686       | CaURA4     | Nucleotide hydrolase activity                                                                                       |                                                            |
| CA0468 | 1.0 | 1.0 | 1.0 | DIB1       | 2866091..2 Component of the U4/         | orf19.9531 | 8685       | CaTRX2     | CELL CYCLE AND DNA PROCESSING ""PROTEIN FATE [folding modification destination] """"CELL RESCUE DEFENSE AND VIRULEN |                                                            |
| CA0469 | 0.9 | 1.0 | 1.0 | IPF18977   | 2869617..2 similar to Saccharomy        | orf19.2621 | 18977      | CaDIB1     | CELL CYC RNA binding                                                                                                |                                                            |
| CA0470 | 1.1 | 1.2 | 1.1 | YPT32      | complemer small GTP-binding pro         | orf19.2622 | 12928      | IPF18977   | TRANSCR RNA binding                                                                                                 |                                                            |
| CA0471 | 1.0 | 1.0 | 1.0 | ECM22      | complemer putative protein involve      | orf19.2623 | 12926      | CaYPT32    | CELLULAF hydrolase activity                                                                                         |                                                            |
| CA0472 | 1.0 | 1.0 | 1.1 | STL1       | 2879598..2 sugar transporter (by        | hor        | orf19.1317 | 19866      | CaECM22                                                                                                             | Lipid fatty-acid and isoprenoid metabolism ""TRANSCRIPTION |
| CA0473 | 1.0 | 0.9 | 0.9 | GRP1       | 2886031..2 dihydroflavonol-4-redu       | orf19.1224 | 12888      | CaSTL1     | C-compour transporter activity                                                                                      |                                                            |
| CA0474 | 1.0 | 1.2 | 1.0 | IPF12887   | complemer Putative multidrug prot       | orf19.1224 | 12887      | CaGRP1     | Metabolism of vitamins cofactors and prosthetic groups                                                              |                                                            |
| CA0475 | 1.0 | 1.2 | 1.0 | IPF2580    | 2891145..2 unknown function             | orf19.8085 | 2580       | IPF12887   | TRANSPORT FACILITATION                                                                                              |                                                            |
| CA0476 | 1.0 | 0.9 | 0.9 | UBP2       | complemer Ubiquitin-specific prote      | orf19.8088 | 2578       | IPF2580    | TRANSCR transcription regulator activity                                                                            |                                                            |
| CA0477 | 0.8 | 0.8 | 0.8 | IPF13839   | 2901451..2 unknown function             | orf19.6017 | 13839      | CaUBP2     | PROTEIN I peptidase activity                                                                                        |                                                            |
| CA0478 | 1.1 | 1.0 | 1.0 | YAE8       | 2903317..2 GTP-binding protein (b       | orf19.1343 | 13843      | IPF13839   | No significant S.c. match                                                                                           |                                                            |
| CA0479 | 1.0 | 1.1 | 1.1 | IPF16191   | 2912423..2 similar to Saccharomy        | orf19.2630 | 16191      | CaYAE8     | PROTEIN I molecular_function unknown                                                                                |                                                            |
| CA0480 | 1.0 | 1.0 | 1.0 | IPF8610    | complemer permease (by homolog          | orf19.2633 | 8610       | IPF16191   | CELL CYC protein binding                                                                                            |                                                            |
| CA0481 | 1.1 | 1.0 | 0.9 | STE14      | 2922192..2 farnesyl cystein carbox      | orf19.7766 | 14764      | IPF8610    | C-compound and carbohydrate metabolism CELLULAR TRANSPORT AND TRANSPORT MECHANISMS SUBCELLULAR LOCALISATIO          |                                                            |
| CA0482 | 0.9 | 1.1 | 1.0 | IPF14763   | complemer delta-12 fatty acid des       | orf19.7765 | 14763      | CaSTE14    | Lipid fatty-ε transferase activity                                                                                  |                                                            |
| CA0483 | 0.9 | 0.9 | 0.9 | SEC9       | complemer transport protein (by h       | orf19.7764 | 19868      | IPF14763   | No significant S.c. match                                                                                           |                                                            |
| CA0484 | 1.0 | 1.0 | 1.0 | IPF19622   | 2928945..2 unknown function             | orf19.7762 | 19622      | CaSEC9     | CELLULAF transporter activity                                                                                       |                                                            |
| CA0485 | 1.0 | 1.1 | 1.1 | IPF17574   | 2936416..2 Unknown function             | orf19.1103 | 17574      | IPF19622   | No significant S.c. match                                                                                           |                                                            |
| CA0486 | 0.9 | 1.0 | 1.0 | IPF15540   | 2949943..2 unknown function             | orf19.258  | 13725      | IPF17574   | UNCLASSImolecular_function unknown                                                                                  |                                                            |
| CA0487 | 1.0 | 1.1 | 1.0 | IPF13724   | 2951078..2 unknown function             | orf19.259  | 13724      | IPF15540   | No significant S.c. match                                                                                           |                                                            |
| CA0488 | 0.9 | 0.9 | 1.0 | SEC59      | complemer Dolichol kinase (by hor       | orf19.261  | 13722      | IPF13724   | No significant S.c. match                                                                                           |                                                            |
| CA0489 | 1.0 | 4.9 | 0.9 | IPF6960    | 2957473..2 unknown function             | orf19.2636 | 6960       | CaSEC59    | Lipid fatty-ε transferase activity                                                                                  |                                                            |
| CA0490 | 0.9 | 1.0 | 0.9 | COS161     | 2958234..2 involved in manganese        | orf19.2637 | 6961       | IPF6960    | UNCLASSIFIED PROTEINS                                                                                               |                                                            |
| CA0491 | 0.8 | 0.9 | 1.0 | IPF18966   | 2965098..2 unknown function             |            | 18966      | CaCOS161   | REGULATION OF/INTERACTION WITH CELLULAR ENVIRONMENT SUBCELLULAR LOCALISATION                                        |                                                            |
| CA0492 | 1.0 | 1.0 | 0.9 | SNU71      | complemer Associated with U1 snl        | orf19.9068 | 14405      | IPF18966   | No significant S.c. match                                                                                           |                                                            |
| CA0493 | 0.9 | 1.0 | 0.9 | PRP39.3    | 2967769..2 pre-mRNA splicing fac        | orf19.1492 | 14401      | CaSNU71    | TRANSCR RNA binding                                                                                                 |                                                            |
| CA0494 | 0.9 | 1.1 | 1.0 | RAD7       | complemer nucleotide excision rep       | orf19.9070 | 14400      | CaPRP39.   | TRANSCR RNA binding                                                                                                 |                                                            |
| CA0495 | 1.0 | 0.4 | 0.4 | IPF20056   | 2975622..2 unknown function             | orf19.2659 | 20057      | CaRAD7     | CELL CYC DNA binding                                                                                                |                                                            |
| CA0496 | 1.0 | 0.8 | 1.0 | IPF11644   | complemer unknown function              | orf19.2660 | 11644      | IPF20056   | UNCLASSImolecular_function unknown                                                                                  |                                                            |
| CA0498 | 1.0 | 1.0 | 1.0 | CTA211.3F  | 2982842..2 transcriptional activato     | orf19.2661 | 11534      | IPF11644   | UNCLASSItransferase activity                                                                                        |                                                            |
| CA0499 | 1.0 | 1.0 | 1.0 | IFA9       | 2983962..2 unknown function             | orf19.2663 | 11533      | CaCTA211   | No significant S.c. match                                                                                           |                                                            |
| CA0500 | 1.0 | 1.0 | 1.0 | IPF20058   | 2997081..2 unknown function             | orf19.4793 | 20058      | CaIFA9     | Nucleotide metabolism CELL CYCLE AND DNA PROCESSING CELLULAR COMMUNICATION/SIGNAL TRANSDUCTION MECHANISM            |                                                            |
| CA0501 | 1.0 | 1.0 | 1.0 | IPF16501   | complemer unknown function              | orf19.1225 | 16501      | IPF20058   | UNCLASSImolecular_function unknown                                                                                  |                                                            |
| CA0502 | 1.0 | 1.0 | 0.9 | IPF16761   | 3004358..3 unknown function             | orf19.2664 | 16761      | IPF16501   | TRANSCRIPTION CELLULAR TRANSPORT AND TRANSPORT MECHANISMS SUBCELLULAR LOCALISATION                                  |                                                            |
| CA0503 | 1.1 | 1.0 | 1.1 | PMT6       | complemer protein mannosyltransf        | orf19.3802 | 9088       | IPF16761   | TRANSPO:molecular_function unknown                                                                                  |                                                            |
| CA0504 | 1.0 | 1.0 | 1.1 | IPF16466   | complemer unknown function              | orf19.2778 | 16466      | CaPMT6     | C-compound and carbohydrate metabolism ""PROTEIN FATE [folding modification destination] ""                         |                                                            |
| CA0505 | 1.0 | 1.1 | 1.0 | IPF11988.† | complemer unknown function, 3-prime end |            | 18957      | IPF16466   | UNCLASSImolecular_function unknown                                                                                  |                                                            |
| CA0506 | 1.0 | 1.0 | 0.9 | IPF11988   | complemer unknown function              | orf19.3626 | 11988      | IPF11988.† | No significant S.c. match                                                                                           |                                                            |
| CA0507 | 1.0 | 1.0 | 1.0 | IPF11989   | complemer unknown function              | orf19.3625 | 11989      | IPF11988   | Amino acid molecular_function unknown                                                                               |                                                            |
| CA0508 | 1.0 | 1.0 | 1.0 | IPF11991   | complemer similar to Saccharomy         | orf19.1110 | 11991      | IPF11989   | PROTEIN FATE [folding modification destination]                                                                     |                                                            |
| CA0509 | 0.9 | 0.9 | 0.9 | CDC24      | 3045005..3 GTP/GDP exchange fa          | orf19.1068 | 19624      | IPF11991   | Nucleotide RNA binding                                                                                              |                                                            |
| CA0510 | 1.0 | 0.9 | 0.9 | ETF1       | 3048333..3 ETF-UBIQUINONE O>            | orf19.1068 | 16916      | CaCDC24    | CELL CYC signal transducer activity                                                                                 |                                                            |
| CA0511 | 1.1 | 1.1 | 1.1 | IPF13975   | 3057583..3 unknown function             | orf19.4953 | 13975      | CaETF1     | ENERGY oxidoreductase activity                                                                                      |                                                            |
| CA0512 | 1.0 | 1.0 | 1.0 | VMA16      | complemer H+-ATPase 23 KD sub           | orf19.4954 | 13974      | IPF13975   | UNCLASSImolecular_function unknown                                                                                  |                                                            |
| CA0513 | 1.0 | 1.0 | 1.1 | IPF13972   | 3060211..3 unknown function             | orf19.4955 | 13972      | CaVMA16    | SUBCELLL transporter activity                                                                                       |                                                            |
| CA0514 | 1.2 | 0.9 | 1.1 | BEM1       | 3064900..3 bud emergence media          | orf19.4645 | 13602      | IPF13972   | CELL CYC molecular_function unknown                                                                                 |                                                            |
| CA0516 | 0.9 | 1.0 | 0.9 | IPF11526   | 3073275..3 unknown function             | orf19.2804 | 11526      | CaBEM1     | CELL CYC protein binding                                                                                            |                                                            |
| CA0517 | 1.0 | 0.9 | 1.1 | HEM13      | complemer by homology S. cerev.         | orf19.2803 | 11525      | IPF11526   | No significant S.c. match                                                                                           |                                                            |
| CA0519 | 0.9 | 1.0 | 0.9 | MRPL10.3   | 3081012..3 ribosomal protein, 3-pr      | orf19.1101 | 19871      | CaHEM13    | Metabolism oxidoreductase activity                                                                                  |                                                            |
| CA0520 | 1.1 | 0.9 | 1.0 | IPF4466    | complemer unknown function              | orf19.3531 | 4466       | CaMRPL10   | PROTEIN I structural molecule activity                                                                              |                                                            |
| CA0521 | 0.8 | 0.4 | 0.9 | CKA2       | 3083229..3 casein kinase II alpha       | orf19.3530 | 4465       | IPF4466    | UNCLASSIFIED PROTEINS                                                                                               |                                                            |

|        |     |     |     |           |                                     |             |                 |                                                                                                                  |
|--------|-----|-----|-----|-----------|-------------------------------------|-------------|-----------------|------------------------------------------------------------------------------------------------------------------|
| CA0522 | 1.1 | 1.0 | 1.1 | IPF4463   | complemer unknown function          | orf19.1101: | 4463 CaCKA2     | CELL CYC protein kinase activity                                                                                 |
| CA0523 | 0.9 | 0.8 | 0.9 | IPF4459   | 3087654..3 unknown function         | orf19.1101: | 4459 IPF4463    | CELLULAR TRANSPORT AND TRANSPORT MECHANISMS SUBCELLULAR LOCALISATION TRANSPORT FACILITATION UNCLASS              |
| CA0524 | 1.0 | 1.1 | 0.9 | CYT12     | 3089174..3 cytochrome-c1 (by hon    | orf19.1101  | 18952 IPF4459   | UNCLASSImolecular_function unknown                                                                               |
| CA0525 | 1.0 | 1.0 | 1.0 | MSB1      | 3093273..3 Morphogenesis-relatec    | orf19.8726  | 6172 CaCYT12    | ENERGY SUBCELLULAR LOCALISATION                                                                                  |
| CA0526 | 1.0 | 0.9 | 0.9 | BUB3      | complemer cell cycle arrest protei  | orf19.2655  | 10586 CaMSB1    | CELL FATImolecular_function unknown                                                                              |
| CA0528 | 1.0 | 1.0 | 1.1 | ANP1      | complemer Golgi mannosyltransfer    | orf19.3622  | 5178 CaBUB3     | CELL CYC molecular_function unknown                                                                              |
| CA0529 | 0.9 | 0.8 | 0.9 | SMC2      | complemer chromosome segregat       | orf19.3623  | 11993 CaANP1    | PROTEIN ltransferase activity                                                                                    |
| CA0530 | 0.9 | 0.9 | 1.0 | IPF19633  | 3132995..3 similar to Saccharomy    | orf19.8685  | 19634 CaSMC2    | CELL CYC DNA binding                                                                                             |
| CA0531 | 1.0 | 1.1 | 1.1 | UBC1      | 3139627..3 ubiquitin-conjugating e  | orf19.8686  | 10066 IPF19633  | TRANSCR RNA binding                                                                                              |
| CA0532 | 0.9 | 1.0 | 0.9 | IRE1      | 3142571..3 protein kinase (by hom   | orf19.5068  | 16157 CaUBC1    | PROTEIN FATE [folding modification destination] ""CELLULAR TRANSPORT AND TRANSPORT MECHANISMS CELL FATE SUBCELLU |
| CA0533 | 1.1 | 1.0 | 1.0 | IPF19872  | complemer unknown function          | orf19.5067  | 19872 CaIRE1    | Lipid fatty-ε protein kinase activity                                                                            |
| CA0534 | 1.1 | 1.1 | 1.1 | IPF15607  | 3147427..3 unknown function         | orf19.5066  | 15607 IPF19872  | UNCLASSImolecular_function unknown                                                                               |
| CA0535 | 0.9 | 1.0 | 0.9 | IPF15606  | 3150263..3 similar to Saccharomy    | orf19.5065  | 15606 IPF15607  | UNCLASSImolecular_function unknown                                                                               |
| CA0536 | 1.0 | 1.0 | 1.0 | PANC.3    | 3153095..3 pantothenate syntheta:   | orf19.2815  | 18946 IPF15606  | PROTEIN lmolecular_function unknown                                                                              |
| CA0537 | 1.0 | 1.0 | 0.9 | PRP16     | complemer RNA-dependent ATPa:       | orf19.2818  | 19698 CaPANC.3  | Metabolismr ligase activity                                                                                      |
| CA0538 | 1.0 | 1.0 | 1.0 | IPF10901  | 3157112..3 unknown function         | orf19.2819  | 10901 CaPRP16   | TRANSCR RNA binding,helicase activity                                                                            |
| CA0539 | 0.9 | 1.1 | 0.9 | NUP57     | complemer nuclear pore protein (b   | orf19.2820  | 10900 IPF10901  | No significant S.c. match                                                                                        |
| CA0540 | 0.6 | 0.8 | 0.4 | IPF10896  | complemer NADH dehydrogenase        | orf19.2821  | 10896 CaNUP57   | CELLULAF structural molecule activity                                                                            |
| CA0541 | 1.0 | 0.9 | 0.9 | IPF14574  | complemer unknown function          | orf19.1083  | 14574 IPF10896  | No significant S.c. match                                                                                        |
| CA0543 | 1.2 | 0.9 | 0.9 | IPF3255   | complemer similar to Saccharomy     | orf19.2867  | 3255 IPF14574   | UNCLASSImolecular_function unknown                                                                               |
| CA0544 | 1.1 | 1.0 | 1.1 | IPF3252   | 3175336..3 unknown function         | orf19.2868  | 3252 IPF3255    | PROTEIN ltransporter activity                                                                                    |
| CA0545 | 1.0 | 1.0 | 1.1 | IPF3251   | 3176156..3 unknown function         | orf19.2869  | 3251 IPF3252    | No significant S.c. match                                                                                        |
| CA0546 | 1.0 | 1.0 | 1.0 | IPF3250   | 3176959..3 unknown function         | orf19.2870  | 3250 IPF3251    | No significant S.c. match                                                                                        |
| CA0548 | 1.0 | 1.0 | 1.0 | PHO87     | 3183582..3 Member of the phosph     | orf19.2454  | 14853 IPF3250   | No significant S.c. match                                                                                        |
| CA0549 | 1.0 | 1.1 | 1.0 | IPF14031  | 3188241..3 putative secreted aspa   | orf19.852   | 14031 CaPHO87   | Phosphate transporter activity                                                                                   |
| CA0550 | 1.1 | 1.1 | 1.0 | IPF14030  | complemer unknown function          | orf19.851   | 14030 IPF14031  | PROTEIN FATE [folding modification destination] ""SUBCELLULAR LOCALISATION                                       |
| CA0551 | 1.3 | 1.4 | 1.1 | CDC37     | complemer Cell division control pr  | orf19.5531  | 4339 IPF14030   | PROTEIN FATE [folding modification destination]                                                                  |
| CA0552 | 1.0 | 1.2 | 1.0 | IPF4343   | complemer similar to Saccharomy     | orf19.5533  | 4343 CaCDC37    | CELL CYC chaperone activity                                                                                      |
| CA0553 | 1.0 | 1.1 | 1.0 | IPF16653  | complemer unknown function          | orf19.5534  | 16653 IPF4343   | PROTEIN lenzyme regulator activity                                                                               |
| CA0554 | 0.7 | 0.8 | 0.7 | HAS1      | 3205905..3 ATP-DEPENDENT RN         | orf19.1144  | 5784 IPF16653   | UNCLASSImolecular_function unknown                                                                               |
| CA0555 | 1.0 | 1.0 | 1.0 | HYS2      | 3207834..3 DNA-directed DNA pol     | orf19.3960  | 5785 CaHAS1     | CELL CYC molecular_function unknown                                                                              |
| CA0556 | 1.0 | 1.1 | 1.0 | IPF15920  | complemer zinc-finger containing    | orf19.4972  | 15920 CaHYS2    | CELL CYC nucleotidyltransferase activity                                                                         |
| CA0557 | 1.2 | 1.2 | 1.0 | HYR1.53   | 3223440..3 Hyphally regulated pro   | orf19.1144  | 7957 IPF15920   | TRANSCRIPTION SUBCELLULAR LOCALISATION                                                                           |
| CA0558 | 1.0 | 1.4 | 1.0 | GPX2      | 3225137..3 glutathione peroxidase   | orf19.85    | 13205 CaHYR1.5  | Hypha-specific No significant S.c. match                                                                         |
| CA0559 | 1.0 | 1.5 | 1.1 | GPX1      | 3227250..3 glutathione peroxidase   | orf19.86    | 13207 CaGPX2    | CELL RESCUE DEFENSE AND VIRULENCE                                                                                |
| CA0560 | 1.0 | 0.9 | 0.9 | GPX3      | 3229232..3 glutathione peroxidase   | orf19.87    | 13211 CaGPX1    | CELL RES oxidoreductase activity                                                                                 |
| CA0561 | 1.0 | 1.0 | 1.0 | CIN4      | complemer GTP-binding protein       | orf19.2925  | 15237 CaGPX3    | CELL RESCUE DEFENSE AND VIRULENCE                                                                                |
| CA0562 | 0.9 | 1.0 | 1.0 | PSO2      | 3232781..3 Interstrand crosslink re | orf19.2926  | 15236 CaCIN4    | CELL CYCLE AND DNA PROCESSING SUBCELLULAR LOCALISATION                                                           |
| CA0563 | 1.0 | 1.0 | 1.1 | MNN11     | complemer Mannosyltransferase c     | orf19.2927  | 14216 CaPSO2    | CELL CYC DNA binding                                                                                             |
| CA0565 | 1.1 | 1.1 | 0.9 | IPF13526  | complemer unknown function          | orf19.6250  | 13526 CaMNN11   | PROTEIN ltransferase activity                                                                                    |
| CA0566 | 0.9 | 1.2 | 1.0 | IPF13522  | 3242173..3 unknown function         | orf19.6252  | 13522 IPF13526  | CELLULAF molecular_function unknown                                                                              |
| CA0567 | 1.8 | 1.9 | 1.4 | RPS23     | complemer Ribosomal protein S23     | orf19.1363  | 13519 IPF13522  | SUBCELLL transcription regulator activity                                                                        |
| CA0568 | 1.1 | 1.1 | 1.1 | APS2      | 3246330..3 AP-2 complex subunit,    | orf19.8729  | 16570 CaRPS23   | PROTEIN l structural molecule activity                                                                           |
| CA0569 | 1.0 | 1.0 | 0.9 | CDC8      | complemer dTMP kinase (by homc      | orf19.8730  | 16571 CaAPS2    | PROTEIN lmolecular_function unknown                                                                              |
| CA0570 | 0.7 | 0.8 | 0.7 | SVL3      | 3250629..3 Involved in vacuole fu   | orf19.8732  | 17015 CaCDC8    | Nucleotide transferase activity                                                                                  |
| CA0571 | 1.1 | 0.9 | 1.0 | CDC43     | 3256714..3 geranylgeranyltransfer   | orf19.9369  | 14866 CaSVL3    | CELL FATImolecular_function unknown                                                                              |
| CA0572 | 0.9 | 0.8 | 0.9 | IPF14864  | 3258387..3 unknown function         | orf19.9370  | 18938 CaCDC43   | Lipid fatty-ε signal transducer activity                                                                         |
| CA0573 | 0.4 | 0.5 | 0.3 | PEX14     | 3259960..3 peroxisomal protein (b   | orf19.9371  | 15186 IPF14864  | CELLULAF transporter activity                                                                                    |
| CA0574 | 1.1 | 1.3 | 1.5 | IPF15183  | 3262553..3 unknown function         | orf19.9373  | 15183 CaPEX14   | PROTEIN lprotein binding                                                                                         |
| CA0575 | 0.9 | 0.9 | 0.9 | IPF15178  | 3264478..3 Unknown function         | orf19.1808  | 15178 IPF15183  | No significant S.c. match                                                                                        |
| CA0576 | 1.0 | 1.0 | 1.0 | NPR1      | 3271396..3 nitrogen permease rea    | orf19.6232  | 12521 IPF15178  | No significant S.c. match                                                                                        |
| CA0577 | 0.9 | 0.8 | 1.0 | IPF16051  | 3276393..3 unknown function         | orf19.3068  | 16051 CaNPR1    | Nitrogen and sulphur metabolism CELLULAR TRANSPORT AND TRANSPORT MECHANISMS                                      |
| CA0578 | 1.0 | 1.1 | 1.0 | IPF9605   | 3283180..3 similar to Saccharomy    | orf19.3071  | 9605 IPF16051   | TRANSCRIPTION                                                                                                    |
| CA0579 | 0.9 | 1.0 | 1.0 | IPF3184.E | 3296789..3 unknown function, exo    | orf19.3560  | 3184 IPF9605    | CELL CYC protein phosphatase activity                                                                            |
| CA0580 | 1.0 | 0.9 | 0.9 | IPF3184.E | 3297542..3 unknown function, exo    | orf19.3559  | 3182 IPF3184.e  | UNCLASSIFIED PROTEINS                                                                                            |
| CA0581 | 1.0 | 1.0 | 1.0 | IPF3181   | 3298373..3 similar to Saccharomy    | orf19.3558  | 3181 IPF3184.e  | UNCLASSI structural molecule activity                                                                            |
| CA0582 | 1.0 | 0.9 | 0.9 | IPF3180   | 3299065..3 unknown function         | orf19.1104  | 3180 IPF3181    | CELLULAF molecular_function unknown                                                                              |
| CA0583 | 1.1 | 1.1 | 1.0 | GSH1.EXC  | complemer gamma-glutamylcyste       | orf19.1252  | 12218 IPF3180   | UNCLASSImolecular_function unknown                                                                               |
| CA0584 | 1.0 | 1.0 | 1.1 | GSH1.EXC  | complemer Gamma-glutamylcyste       | orf19.1252  | 18932 CaGSH1.e  | CELL RES ligase activity                                                                                         |
| CA0585 | 1.1 | 1.3 | 1.1 | ADE5.7    | complemer phosphoribosylamine-ζ     | orf19.1252  | 13495 CaGSH1.e  | CELL RESCUE DEFENSE AND VIRULENCE                                                                                |
| CA0586 | 1.1 | 1.1 | 1.2 | IPF13493  | 3310418..3 Unknown function         | orf19.1252  | 17932 CaADE5.7  | Nucleotide ligase activity                                                                                       |
| CA0587 | 1.1 | 1.1 | 1.0 | SPO14.5E  | complemer phospholipase D, 5-pri    | orf19.8753  | 13085 IPF13493  | PROTEIN FATE [folding modification destination] ""CELLULAR TRANSPORT AND TRANSPORT MECHANISMS SUBCELLULAR LOCAL  |
| CA0588 | 1.0 | 1.1 | 1.1 | IPF13081  | complemer unknown function          | orf19.1162  | 13081 CaSPO14.5 | Lipid fatty-ε hydrolase activity                                                                                 |
| CA0589 | 1.0 | 1.0 | 1.0 | IPF13080  | complemer unknown function          | orf19.8756  | 13080 IPF13081  | No significant S.c. match                                                                                        |
| CA0590 | 1.0 | 1.0 | 1.0 | IPF13079  | 3317420..3 unknown function         | orf19.8756  | 13079 IPF13080  | UNCLASSIFIED PROTEINS                                                                                            |
| CA0591 | 1.0 | 0.9 | 1.0 | ALS3.5E   | complemer agglutinin-like protein,  | orf19.1816  | 12561 IPF13079  | UNCLASSImolecular_function unknown                                                                               |
| CA0592 | 1.0 | 1.1 | 1.0 | IPF8862   | complemer unknown function          | orf19.1237  | 8862 CaALS3.5e  | CELL FATI signal transducer activity                                                                             |
| CA0593 | 1.0 | 1.0 | 1.0 | ARP6      | 3333180..3 actin-related protein (b | orf19.4904  | 8861 IPF8862    | No significant S.c. match                                                                                        |
| CA0594 | 1.0 | 0.9 | 0.9 | IPF8860   | complemer similar to Saccharomy     | orf19.1236  | 8860 CaARP6     | SUBCELLL molecular_function unknown                                                                              |
| CA0595 | 1.0 | 1.0 | 0.9 | IPF8856   | complemer unknown function          | orf19.1236  | 8856 IPF8860    | Lipid fatty-ε hydrolase activity                                                                                 |
| CA0596 | 1.0 | 0.9 | 1.0 | IPF9706   | 3349430..3 unknown function         | orf19.1234  | 9706 IPF8856    | UNCLASSIFIED PROTEINS                                                                                            |
| CA0597 | 1.0 | 1.0 | 0.9 | IPF9704   | 3352289..3 similar to Saccharomy    | orf19.1234  | 9704 IPF9706    | UNCLASSImolecular_function unknown                                                                               |



|        |     |     |     |            |                                             |            |       |            |                                                                                                                       |
|--------|-----|-----|-----|------------|---------------------------------------------|------------|-------|------------|-----------------------------------------------------------------------------------------------------------------------|
| CA0598 | 1.1 | 1.0 | 1.0 | IPF9703    | complemer unknown function                  | orf19.1234 | 9703  | IPF9704    | TRANSCR transcription regulator activity                                                                              |
| CA0599 | 1.0 | 1.0 | 0.9 | IPF12428   | 3357819...3 unknown function                | orf19.1018 | 12428 | IPF9703    | No significant S.c. match                                                                                             |
| CA0600 | 0.9 | 0.9 | 0.9 | MSN5.5F    | 3359459...3 Importin-beta family m          | orf19.2666 | 12426 | IPF12428   | UNCLASSI RNA binding                                                                                                  |
| CA0601 | 1.0 | 0.9 | 1.0 | MSN5.3F    | 3361884...3 Importin-beta family m          | orf19.1018 | 18929 | CaMSN5.5   | CELLULAF protein binding                                                                                              |
| CA0602 | 1.0 | 1.0 | 1.0 | CTA22      | 3369449...3 Protein with putative tr        | orf19.3074 | 1708  | CaMSN5.3   | CELLULAR TRANSPORT AND TRANSPORT MECHANISMS CELL FATE                                                                 |
| CA0603 | 1.0 | 1.0 | 1.1 | IPF1709    | complemer unknown function                  | orf19.3076 | 1709  | CaCTA22    | No significant S.c. match                                                                                             |
| CA0604 | 1.0 | 1.1 | 1.0 | VID21      | 3370884...3 unknown function                | orf19.3077 | 1713  | IPF1709    | CLASSIFIC molecular_function unknown                                                                                  |
| CA0605 | 1.2 | 1.7 | 1.1 | UTR2       | 3376805...3 1,3-1,4-beta-glucanase          | orf19.9240 | 8080  | CaVID21    | UNCLASSI molecular_function unknown                                                                                   |
| CA0606 | 1.1 | 1.1 | 1.1 | COP1       | 3378711...3 coatomer complex alpl           | orf19.9241 | 8079  | CaUTR2     | CONTROL molecular_function unknown                                                                                    |
| CA0609 | 0.6 | 0.5 | 0.6 | CDR11.3F   | complemer multidrug resistance pr           | orf19.919  | 12978 | CaCOP1     | CELLULAF molecular_function unknown                                                                                   |
| CA0610 | 1.0 | 0.9 | 1.0 | CDR11.5F   | complemer multidrug resistance pr           | orf19.8533 | 12975 | CaCDR11    | Lipid fatty-acid and isoprenoid metabolism *****CELL RESCUE DEFENSE AND VIRULENCE ""REGULATION OF/INTERACTION WITH CE |
| CA0611 | 1.1 | 1.1 | 1.1 | IPF17542   | 3400215...3 unknown function                | orf19.1302 | 17542 | CaCDR11    | Lipid fatty-acid and isoprenoid metabolism *****CELL RESCUE DEFENSE AND VIRULENCE ""REGULATION OF/INTERACTION WITH CE |
| CA0612 | 1.1 | 1.1 | 1.1 | IPF17545   | complemer unknown function                  | orf19.5579 | 17545 | IPF17542   | No significant S.c. match                                                                                             |
| CA0614 | 1.2 | 1.0 | 1.0 | IPF19700   | 3410866...3 unknown function                | orf19.1600 | 19700 | IPF17545   | No significant S.c. match                                                                                             |
| CA0615 | 2.0 | 3.6 | 1.4 | RPL3       | 3413519...3 60S large subunit ribos         | orf19.1601 | 6742  | IPF19700   | No significant S.c. match                                                                                             |
| CA0616 | 1.0 | 0.9 | 1.0 | PHO11      | complemer Secreted acid phosphat            | orf19.2619 | 7796  | CaRPL3     | PROTEIN t structural molecule activity                                                                                |
| CA0617 | 1.1 | 1.1 | 1.5 | MET2       | complemer Homoserine O-acetyltr             | orf19.2618 | 7797  | CaPHO11    | Phosphate hydrolase activity                                                                                          |
| CA0618 | 0.8 | 0.8 | 0.9 | UGT51      | complemer UDP-glucose:sterol gl             | orf19.2616 | 7800  | CaMET2     | Amino acid transferase activity                                                                                       |
| CA0619 | 1.1 | 1.0 | 1.0 | IPF18924   | 3427421...3 unknown function                | orf19.3146 | 18924 | CaUGT51    | Lipid fatty-t transferase activity                                                                                    |
| CA0620 | 1.1 | 1.0 | 1.0 | IPF17998   | 3428371...3 unknown function                | orf19.3147 | 17998 | IPF18924   | No significant S.c. match                                                                                             |
| CA0621 | 1.0 | 1.0 | 1.0 | IPF17999   | complemer unknown function                  | orf19.3148 | 17999 | IPF17998   | No significant S.c. match                                                                                             |
| CA0622 | 1.0 | 2.1 | 1.3 | IPF14171   | complemer unknown function                  | orf19.3149 | 14171 | IPF17999   | No significant S.c. match                                                                                             |
| CA0623 | 1.3 | 1.2 | 1.2 | MSS4.3     | 3440139...3 phosphatidylinositol-4-         | orf19.3153 | 15141 | IPF14171   | UNCLASSI molecular_function unknown                                                                                   |
| CA0624 | 0.9 | 1.2 | 1.0 | IPF312     | 3442861...3 unknown function                | orf19.3154 | 15139 | CaMSS4.3   | Lipid fatty-t transferase activity                                                                                    |
| CA0625 | 1.0 | 1.0 | 0.9 | IPF19637   | 3448212...3 unknown function                |            | 19638 | IPF312     | UNCLASSI molecular_function unknown                                                                                   |
| CA0626 | 0.9 | 1.0 | 0.7 | IPF3161    | complemer Unknown function                  | orf19.3161 | 3161  | IPF19637   | No significant S.c. match                                                                                             |
| CA0627 | 2.0 | 2.1 | 1.0 | HSP12      | complemer Heat shock protein (by            | orf19.3160 | 3160  | IPF3161    | UNCLASSI transcription regulator activity                                                                             |
| CA0628 | 1.1 | 1.1 | 1.1 | IPF3878    | 3458867...3 unknown function                | orf19.773  | 3878  | CaHSP12    | C-compour chaperone activity                                                                                          |
| CA0629 | 1.1 | 1.2 | 1.1 | IPF3876    | 3460112...3 unknown function                | orf19.775  | 3876  | IPF3878    | UNCLASSI molecular_function unknown                                                                                   |
| CA0630 | 1.1 | 1.0 | 1.0 | IPF3875.5t | 3463174...3 unknown function, 5-pr          | orf19.776  | 3875  | IPF3876    | REGULATION OF/INTERACTION WITH CELLULAR ENVIRONMENT                                                                   |
| CA0631 | 1.0 | 0.9 | 1.0 | IPF11698   | 3468528...3 similar to Saccharomy           | orf19.1181 | 11698 | IPF3875.5t | CELL CYCLE AND DNA PROCESSING CELL FATE                                                                               |
| CA0632 | 1.0 | 1.7 | 1.0 | RPS5       | complemer ribosomal protein S5.e            | orf19.1181 | 11696 | IPF11698   | TRANSPO transporter activity                                                                                          |
| CA0633 | 1.0 | 1.0 | 1.0 | IPF16269   | complemer unknown function                  | orf19.9340 | 16269 | CaRPS5     | PROTEIN t structural molecule activity                                                                                |
| CA0634 | 0.9 | 0.9 | 1.0 | IPF16267   | 3477624...3 unknown function                | orf19.1772 | 16267 | IPF16269   | UNCLASSI molecular_function unknown                                                                                   |
| CA0635 | 1.1 | 1.0 | 1.1 | IPF9036    | complemer similar to Saccharomy             | orf19.9342 | 9036  | IPF16267   | UNCLASSI molecular_function unknown                                                                                   |
| CA0636 | 1.3 | 1.7 | 1.0 | FDH4.3F    | complemer Formate dehydrogenase, 3-prime    |            | 18026 | IPF9036    | Nitrogen ar DNA binding                                                                                               |
| CA0639 | 0.8 | 1.1 | 1.0 | FDH13.3F   | complemer Putative formate dehydrogenase, : |            | 18922 | CaFDH4.3t  | ENERGY                                                                                                                |
| CA0641 | 1.2 | 1.2 | 1.1 | IPF15977   | complemer unknown function                  | orf19.4698 | 15977 | CaFDH13.:  | ENERGY                                                                                                                |
| CA0642 | 1.0 | 1.0 | 1.3 | ERG25      | complemer C-4 sterol methyl oxide           | orf19.3732 | 9179  | IPF15977   | No significant S.c. match                                                                                             |
| CA0643 | 0.9 | 1.0 | 0.8 | IDP2       | complemer isocitrate dehydrogena            | orf19.3733 | 9177  | CaERG25    | Lipid fatty-t oxidoreductase activity                                                                                 |
| CA0644 | 1.0 | 1.1 | 1.0 | IPF17131   | 3520884...3 unknown function                | orf19.69   | 17131 | CaIDP2     | C-compour oxidoreductase activity                                                                                     |
| CA0645 | 1.0 | 0.9 | 1.0 | IPF18917.† | 3523342...3 unknown function, 5-prime end   |            | 18917 | IPF17131   | No significant S.c. match                                                                                             |
| CA0646 | 0.9 | 0.8 | 0.9 | IPF19702   | 3524828...3 unknown function                | orf19.1180 | 19702 | IPF18917.† | PROTEIN FATE [folding modification destination] ""CELLULAR TRANSPORT AND TRANSPORT MECHANISMS                         |
| CA0647 | 2.1 | 0.7 | 1.2 | IPF19706   | complemer unknown function                  | orf19.4334 | 19706 | IPF19702   | No significant S.c. match                                                                                             |
| CA0648 | 0.9 | 0.9 | 0.9 | IPF12399   | 3540983...3 unknown function                | orf19.3210 | 12399 | IPF19706   | No significant S.c. match                                                                                             |
| CA0649 | 0.8 | 0.9 | 1.0 | RFC3       | complemer DNA replication factor            | orf19.3211 | 12401 | IPF12399   | No significant S.c. match                                                                                             |
| CA0650 | 1.0 | 1.0 | 1.0 | IPF11566   | 3546264...3 unknown function                | orf19.11   | 11566 | CaRFC3     | CELL CYC DNA binding                                                                                                  |
| CA0651 | 1.1 | 1.0 | 0.9 | ALK8       | 3547768...3 n-alkane inducible cytc         | orf19.10   | 11568 | IPF11566   | No significant S.c. match                                                                                             |
| CA0652 | 1.0 | 0.8 | 1.1 | SHP1       | complemer potential regulatory sul          | orf19.1008 | 11553 | CaALK8     | CELL RESCUE DEFENSE AND VIRULENCE ""CELL FATE CONTROL OF CELLULAR ORGANIZATION                                        |
| CA0653 | 1.6 | 1.9 | 3.0 | MET6       | complemer BY HOMOLOGY TO S                  | orf19.1008 | 11555 | CaSHP1     | ENERGY t molecular_function unknown                                                                                   |
| CA0654 | 1.0 | 0.9 | 1.1 | IPF11550.‡ | complemer Ca2+-transporting P-ty            | orf19.1008 | 11557 | CaMET6     | Amino acid transferase activity                                                                                       |
| CA0655 | 1.0 | 0.9 | 1.0 | IPF11560.‡ | complemer Ca2+-transporting P-ty            | orf19.1008 | 11560 | IPF11550.‡ | CELLULAR TRANSPORT AND TRANSPORT MECHANISMS REGULATION OF/INTERACTION WITH CELLULAR ENVIRONMENT SUB                   |
| CA0656 | 1.1 | 1.1 | 1.0 | IPF12470   | complemer unknown function                  | orf19.5573 | 12470 | IPF11560.‡ | CELLULAR TRANSPORT AND TRANSPORT MECHANISMS REGULATION OF/INTERACTION WITH CELLULAR ENVIRONMENT SUB                   |
| CA0657 | 0.9 | 0.9 | 0.9 | IPF19877   | 3576492...3 putative cysteine synth         | orf19.5574 | 19877 | IPF12470   | No significant S.c. match                                                                                             |
| CA0658 | 1.0 | 0.9 | 1.0 | IPF16505   | complemer Unknown function                  | orf19.5575 | 16505 | IPF19877   | Amino acid lyase activity                                                                                             |
| CA0659 | 0.9 | 0.9 | 1.0 | IPF16189.‡ | complemer panthotenate kinase, 3orf19.5576  |            | 16507 | IPF16505   | UNCLASSI molecular_function unknown                                                                                   |
| CA0660 | 1.2 | 1.1 | 1.1 | IPF16189.‡ | complemer panthotenate kinase, 5orf19.5577  |            | 16189 | IPF16189.‡ | UNCLASSIFIED PROTEINS                                                                                                 |
| CA0661 | 0.9 | 1.0 | 1.0 | APG7       | 3586042...3 component of the auto           | orf19.8326 | 12207 | IPF16189.‡ | UNCLASSI transferase activity                                                                                         |
| CA0662 | 1.0 | 1.0 | 1.0 | SPC97      | 3588160...3 spindle pole body com           | orf19.708  | 12206 | CaAPG7     | CONTROL OF CELLULAR ORGANIZATION SUBCELLULAR LOCALISATION                                                             |
| CA0663 | 1.0 | 0.9 | 0.9 | PUP2       | complemer 20S proteasome subur              | orf19.709  | 12205 | CaSPC97    | CELL CYC structural molecule activity                                                                                 |
| CA0664 | 1.0 | 1.1 | 2.0 | LSC2.3EO   | complemer succinate-CoA ligase t            | orf19.710  | 12204 | CaPUP2     | CELL CYC peptidase activity                                                                                           |
| CA0665 | 1.0 | 1.1 | 0.9 | INT1       | 3593265...3 integrin-like protein alp       | orf19.1173 | 19580 | CaLSC2.3t  | C-compour ligase activity                                                                                             |
| CA0666 | 1.0 | 1.0 | 1.0 | FIP1       | 3598777...3 Component of pre-mRl            | orf19.1173 | 18911 | CaINT1     | CELL FATE SUBCELLULAR LOCALISATION Other virulence attributes                                                         |
| CA0667 | 1.2 | 1.7 | 1.2 | TIF5       | complemer Translation initiation fa         | orf19.1173 | 15194 | CaFIP1     | TRANSCR RNA binding                                                                                                   |
| CA0669 | 1.0 | 0.8 | 0.9 | IPF5918    | 3603864...3 unknown function                | orf19.448  | 5918  | CaTIF5     | PROTEIN t translation regulator activity,enzyme regulator activity                                                    |
| CA0670 | 1.0 | 1.1 | 1.1 | IPF5915    | 3606013...3 phosphatidyl synthase           | orf19.449  | 5915  | IPF5918    | UNCLASSI molecular_function unknown                                                                                   |
| CA0671 | 1.2 | 1.2 | 1.2 | GRP4       | complemer putative reductase (by            | orf19.1066 | 15555 | IPF5915    | UNCLASSI molecular_function unknown                                                                                   |
| CA0672 | 1.0 | 0.9 | 1.1 | GRP6       | complemer Putative reductase (by            | orf19.3151 | 15804 | CaGRP4     | Metabolism of vitamins cofactors and prosthetic groups                                                                |
| CA0673 | 0.8 | 0.8 | 0.8 | AMO2       | complemer amine oxidase (by hor             | orf19.3152 | 15803 | CaGRP6     | Metabolism of vitamins cofactors and prosthetic groups                                                                |
| CA0674 | 0.4 | 0.2 | 0.7 | IPF19608   | complemer unknown function                  | orf19.8770 | 19608 | CaAMO2     | CELL CYCLE AND DNA PROCESSING                                                                                         |
| CA0675 | 1.0 | 1.1 | 1.0 | IPF13098   | 3623987...3 unknown function                | orf19.8771 | 13098 | IPF19608   | No significant S.c. match                                                                                             |
| CA0676 | 1.1 | 1.0 | 1.1 | IPF13097   | 3625442...3 unknown function                | orf19.8772 | 13097 | IPF13098   | UNCLASSI molecular_function unknown                                                                                   |

|        |     |     |     |           |                                                  |            |       |           |                                                                 |                                         |
|--------|-----|-----|-----|-----------|--------------------------------------------------|------------|-------|-----------|-----------------------------------------------------------------|-----------------------------------------|
| CA0677 | 1.2 | 1.1 | 1.2 | IPF13095  | complemer unknown function                       | orf19.8773 | 13095 | IPF13097  | Lipid fatty-acid and isoprenoid metabolism                      | CELL CYCLE AND DNA PROCESSING CELL FATE |
| CA0678 | 1.3 | 1.5 | 1.2 | IPF13094  | 3627562..3 unknown function                      | orf19.8774 | 13094 | IPF13095  | CELLULAF transporter activity                                   |                                         |
| CA0679 | 1.1 | 1.0 | 1.1 | IPF13885  | 3629816..3 unknown function, 5-prime end         |            | 13092 | IPF13094  | UNCLASSI molecular_function unknown                             |                                         |
| CA0680 | 1.0 | 1.0 | 1.1 | IPF14511  | 3632428..3 unknown function, 5-pr orf19.1216     |            | 14511 | IPF13885  | No significant S.c. match                                       |                                         |
| CA0681 | 1.0 | 0.9 | 1.0 | IPF14511  | 3633712..3 unknown function, 3-pr orf19.1217     |            | 14513 | IPF14511  | UNCLASSI hydrolase activity                                     |                                         |
| CA0682 | 1.0 | 1.0 | 1.0 | IPF14514  | complemer unknown function                       | orf19.1217 | 14514 | IPF14511  | UNCLASSIFIED PROTEINS                                           |                                         |
| CA0683 | 1.0 | 1.0 | 1.1 | IPF14519  | 3636213..3 unknown function                      | orf19.1217 | 14519 | IPF14514  | TRANSCR transcription regulator activity                        |                                         |
| CA0684 | 1.0 | 1.2 | 0.9 | IPF4450   | complemer unknown function                       | orf19.1217 | 4450  | IPF14519  | No significant S.c. match                                       |                                         |
| CA0685 | 1.1 | 1.0 | 1.0 | ADO1      | complemer adenosine kinase (by t orf19.1303      |            | 6804  | IPF4450   | No significant S.c. match                                       |                                         |
| CA0686 | 0.9 | 0.8 | 0.8 | IPF162    | complemer sulphate transporter (b orf19.3222     |            | 162   | CaADO1    | Nucleotide transferase activity                                 |                                         |
| CA0687 | 1.0 | 1.2 | 1.0 | CPA2      | 3660069..3 arginine-specific carba orf19.3221    |            | 4967  | IPF162    | UNCLASSI molecular_function unknown                             |                                         |
| CA0688 | 1.0 | 0.9 | 1.0 | IPF10555  | 3664415..3 unknown function, 3-pr orf19.1215     |            | 18902 | CaCPA2    | Amino acid ligase activity                                      |                                         |
| CA0689 | 1.1 | 1.3 | 1.1 | IPF14119  | 3669098..3 unknown function                      | orf19.1215 | 14119 | IPF10555  | C-compound and carbohydrate metabolism ENERGY                   |                                         |
| CA0690 | 1.0 | 1.0 | 0.9 | IPF18901  | 3671035..3 unknown function, 3-prime end         |            | 18901 | IPF14119  | No significant S.c. match                                       |                                         |
| CA0691 | 0.8 | 0.9 | 0.8 | CIRT4A    | 3682647..3 Transposase (by homc orf19.1035       |            | 15077 | IPF18901  | No significant S.c. match                                       |                                         |
| CA0692 | 1.7 | 2.4 | 1.4 | PGM2      | 3684723..3 Phosphoglucomutase (orf19.1035        |            | 15073 | CaCirt4a  | No significant S.c. match                                       |                                         |
| CA0693 | 1.0 | 1.2 | 0.9 | IPF12606  | complemer unknown function, 5-pr orf19.3288      |            | 12606 | CaPGM2    | C-compour isomerase activity                                    |                                         |
| CA0694 | 1.0 | 0.9 | 0.9 | IPF12603  | complemer unknown function                       | orf19.3289 | 12603 | IPF12606  | UNCLASSI molecular_function unknown                             |                                         |
| CA0695 | 0.9 | 1.0 | 1.0 | IPF12601  | 3697815..3 unknown function                      | orf19.3290 | 12601 | IPF12603  | No significant S.c. match                                       |                                         |
| CA0696 | 1.0 | 1.0 | 1.1 | HMT1      | 3699135..3 hnRNP methyltransfer: orf19.3291      |            | 12599 | IPF12601  | No significant S.c. match                                       |                                         |
| CA0697 | 1.1 | 1.0 | 1.0 | VTC4      | complemer putative polyphosphate orf19.3363      |            | 15753 | CaHMT1    | PROTEIN I transferase activity                                  |                                         |
| CA0700 | 1.1 | 1.1 | 1.2 | SHR3      | 3709534..3 endoplasmatic reticulu orf19.3366     |            | 10396 | CaVTC4    | UNCLASSI molecular_function unknown                             |                                         |
| CA0701 | 0.9 | 1.0 | 1.0 | IPF10397  | 3710871..3 unknown function                      |            | 10397 | CaSHR3    | PROTEIN I chaperone activity                                    |                                         |
| CA0702 | 0.9 | 1.0 | 1.0 | IPF11812  | 3712258..3 unknown function                      | orf19.1043 | 11812 | IPF10397  | No significant S.c. match                                       |                                         |
| CA0703 | 1.1 | 1.0 | 1.0 | IPF11807  | complemer unknown function                       | orf19.2914 | 11807 | IPF11812  | CELLULAF molecular_function unknown                             |                                         |
| CA0704 | 1.0 | 1.0 | 1.0 | IPF11806  | 3716310..3 similar to Saccharomy orf19.2915      |            | 11806 | IPF11807  | No significant S.c. match                                       |                                         |
| CA0705 | 1.0 | 1.0 | 1.0 | IPF11804  | 3718709..3 unknown function                      | orf19.1043 | 11804 | IPF11806  | PROTEIN I hydrolase activity                                    |                                         |
| CA0706 | 2.7 | 2.4 | 1.1 | IPF7715   | 3720359..3 unknown function                      | orf19.8300 | 7715  | IPF11804  | No significant S.c. match                                       |                                         |
| CA0707 | 0.8 | 0.8 | 0.8 | IPF7711   | complemer related to Neurospora orf19.8298       |            | 7711  | IPF7715   | CELL FATE                                                       |                                         |
| CA0709 | 1.1 | 1.0 | 1.1 | ZORRO2A   | complemer Reverse transcriptase, orf19.3387      |            | 3477  | IPF7711   | No significant S.c. match                                       |                                         |
| CA0711 | 1.1 | 1.3 | 1.0 | VMA5      | complemer H+-ATPase V1 domair orf19.9712         |            | 13718 | CaZorro2a | CELL CYCLE AND DNA PROCESSING                                   |                                         |
| CA0712 | 1.1 | 1.0 | 1.0 | IPF13717  | 3739000..3 unknown function                      | orf19.2167 | 13717 | CaVMA5    | PROTEIN I transporter activity                                  |                                         |
| CA0713 | 1.1 | 1.0 | 0.9 | IFJ2      | complemer Unknown function                       | orf19.2168 | 13715 | IPF13717  | UNCLASSI molecular_function unknown                             |                                         |
| CA0714 | 1.0 | 1.0 | 1.0 | IPF9480   | 3748514..3 unknown function                      | orf19.3394 | 9480  | CaIFJ2    | UNCLASSI molecular_function unknown                             |                                         |
| CA0715 | 1.0 | 1.1 | 1.0 | DBP9      | complemer dead box helicase                      | orf19.3393 | 9477  | IPF9480   | UNCLASSIFIED PROTEINS                                           |                                         |
| CA0716 | 0.9 | 1.0 | 1.0 | DOG2      | complemer 2-deoxyglucose-6-pho: orf19.3392       |            | 9474  | CaDBP9    | CLASSIFIC RNA binding, helicase activity                        |                                         |
| CA0717 | 0.9 | 0.9 | 1.0 | IPF9785   | 3755079..3 unknown function                      | orf19.3453 | 9785  | CaDOG2    | Phosphate hydrolase activity                                    |                                         |
| CA0718 | 1.1 | 1.0 | 1.0 | IPF9782   | complemer unknown function                       | orf19.3455 | 9782  | IPF9785   | CELL FATE PROTEIN ACTIVITY REGULATION                           |                                         |
| CA0719 | 1.0 | 1.0 | 1.0 | IPF9779.5 | 3759945..3 serine/threonine protei orf19.3456    |            | 9779  | IPF9782   | TRANSCR transporter activity                                    |                                         |
| CA0720 | 0.9 | 0.9 | 0.9 | IPF17932  | complemer unknown function                       | orf19.3457 | 17933 | IPF9779.5 | CELL CYCLE AND DNA PROCESSING CELL FATE                         |                                         |
| CA0721 | 1.2 | 1.0 | 1.1 | IPF10429  | 3766761..3 unknown function                      | orf19.1040 | 10429 | IPF17932  | UNCLASSI DNA binding                                            |                                         |
| CA0722 | 1.0 | 1.0 | 1.0 | ERK1      | complemer mitogen-activated proti orf19.1040     |            | 14791 | IPF10429  | UNCLASSI molecular_function unknown                             |                                         |
| CA0723 | 0.9 | 0.9 | 0.9 | PR12      | complemer DNA-directed DNA pol orf19.2885        |            | 14788 | CaERK1    | REGULATI protein kinase activity, signal transducer activity    |                                         |
| CA0724 | 1.0 | 0.9 | 0.9 | IPF13398  | complemer protein kinase (by hom orf19.7708      |            | 13398 | CaPR12    | CELL CYC nucleotidyltransferase activity                        |                                         |
| CA0725 | 1.2 | 1.7 | 0.9 | IPF20063  | 3788443..3 unknown function                      | orf19.1749 | 20063 | IPF13398  | UNCLASSIFIED PROTEINS                                           |                                         |
| CA0727 | 1.1 | 1.0 | 1.0 | IPF7347   | complemer unknown function                       | orf19.1121 | 7347  | IPF20063  | No significant S.c. match                                       |                                         |
| CA0728 | 1.0 | 1.0 | 1.0 | IPF7345   | 3795607..3 unknown function                      | orf19.1121 | 7345  | IPF7347   | UNCLASSI molecular_function unknown                             |                                         |
| CA0729 | 0.9 | 1.1 | 0.9 | IPF7338   | 3800930..3 unknown function                      | orf19.1121 | 7338  | IPF7345   | UNCLASSI molecular_function unknown                             |                                         |
| CA0730 | 1.0 | 1.1 | 0.9 | IPF7334   | 3804299..3 unknown function                      | orf19.1120 | 7334  | IPF7338   | No significant S.c. match                                       |                                         |
| CA0731 | 1.0 | 1.3 | 1.0 | IPF7333   | complemer unknown function                       | orf19.1120 | 7333  | IPF7334   | UNCLASSI molecular_function unknown                             |                                         |
| CA0732 | 1.0 | 1.0 | 1.0 | IPF9000   | complemer unknown function                       | orf19.4636 | 9000  | IPF7333   | CLASSIFIC DNA binding, transcription regulator activity         |                                         |
| CA0733 | 1.0 | 0.9 | 1.0 | NIP1      | 3809260..3 translation initiation fac orf19.4635 |            | 8998  | IPF9000   | No significant S.c. match                                       |                                         |
| CA0734 | 1.0 | 1.0 | 1.0 | IPF8996   | 3812285..3 unknown function                      | orf19.4634 | 8996  | CaNIP1    | PROTEIN I translation regulator activity                        |                                         |
| CA0735 | 1.0 | 1.0 | 1.0 | IPF8995   | 3813827..3 unknown function                      | orf19.4633 | 8995  | IPF8996   | UNCLASSI molecular_function unknown                             |                                         |
| CA0736 | 1.2 | 1.6 | 1.0 | RPL20B    | complemer ribosomal protein (by h orf19.4632     |            | 8994  | IPF8995   | CLASSIFIC oxidoreductase activity                               |                                         |
| CA0737 | 0.9 | 1.0 | 1.0 | SEC16.53F | 3817616..3 Multidomain vesicle coat protein, ii  |            | 19510 | CaRPL20B  | PROTEIN I structural molecule activity                          |                                         |
| CA0738 | 1.0 | 0.9 | 0.9 | SEC16.3F  | 3820133..3 Multidomain vesicle co orf19.1181     |            | 14620 | CaSEC16.3 | C-compound and carbohydrate metabolism SUBCELLULAR LOCALISATION |                                         |
| CA0739 | 1.0 | 1.0 | 1.1 | IPF18885  | complemer similar to Saccharomy orf19.1181       |            | 18885 | CaSEC16.3 | No significant S.c. match                                       |                                         |
| CA0740 | 1.1 | 0.9 | 1.1 | IPF3262.3 | 3832587..3 unknown function, 3-prime end         |            | 3262  | IPF18885  | CLASSIFIC hydrolase activity                                    |                                         |
| CA0741 | 1.0 | 1.0 | 1.0 | IPF3261   | 3833641..3 unknown function                      | orf19.3141 | 3261  | IPF3262.3 | PROTEIN I chaperone activity                                    |                                         |
| CA0742 | 1.0 | 0.9 | 1.0 | IPF3259   | complemer unknown function                       | orf19.3142 | 3259  | IPF3261   | SUBCELLI molecular_function unknown                             |                                         |
| CA0743 | 1.1 | 1.1 | 1.0 | RNA14.3E1 | 3839805..3 component of pre-mRNA 3'-end pi       |            | 14917 | IPF3259   | No significant S.c. match                                       |                                         |
| CA0744 | 1.0 | 1.1 | 1.0 | IPF14919  | 3841658..3 unknown function                      | orf19.9105 | 14919 | CaRNA14.3 | TRANSCR RNA binding                                             |                                         |
| CA0745 | 1.0 | 1.2 | 1.0 | MTF1      | complemer RNA polymerase spec orf19.9104         |            | 14920 | IPF14919  | No significant S.c. match                                       |                                         |
| CA0746 | 4.8 | 1.1 | 1.0 | IPF14921  | 3845097..3 unknown function                      | orf19.1527 | 14921 | CaMTF1    | CELL CYC transcription regulator activity                       |                                         |
| CA0747 | 0.9 | 1.0 | 1.0 | SNF2      | complemer component of SWI/SNI orf19.9102        |            | 15319 | IPF14921  | No significant S.c. match                                       |                                         |
| CA0748 | 1.2 | 1.6 | 1.4 | TFS1      | complemer cdc25-dependent nutri orf19.1974       |            | 6281  | CaSNF2    | C-compour transcription regulator activity                      |                                         |
| CA0749 | 1.1 | 1.0 | 1.1 | HAP5      | complemer CCAAT-binding factor orf19.1973        |            | 6283  | CaTFS1    | CELL CYC enzyme regulator activity                              |                                         |
| CA0750 | 0.9 | 0.8 | 0.9 | IPF6284   | complemer unknown function                       | orf19.1972 | 6284  | CaHAP5    | TRANSCR transcription regulator activity                        |                                         |
| CA0751 | 1.0 | 1.0 | 1.0 | IPF6286   | 3858216..3 unknown function                      | orf19.1971 | 6286  | IPF6284   | UNCLASSI molecular_function unknown                             |                                         |
| CA0752 | 1.0 | 0.9 | 1.0 | MNN22     | 3864361..3 Golgi alpha-1,2-mannc orf19.1128      |            | 10363 | IPF6286   | TRANSCRIPTION                                                   |                                         |
| CA0753 | 1.0 | 1.0 | 0.9 | IPF10359  | complemer unknown function                       | orf19.1128 | 10359 | CaMNN22   | CELL FATE                                                       |                                         |

|        |     |     |     |          |                                             |             |       |          |                                            |                                                                                   |                                                                          |
|--------|-----|-----|-----|----------|---------------------------------------------|-------------|-------|----------|--------------------------------------------|-----------------------------------------------------------------------------------|--------------------------------------------------------------------------|
| CA0754 | 0.9 | 1.0 | 1.1 | IPF15880 | complemer unknown function                  | orf19.3486  | 15880 | IPF10359 | UNCLASSI                                   | molecular_function                                                                | unknown                                                                  |
| CA0755 | 1.0 | 0.8 | 1.1 | IPF14861 | 3877364..3 unknown function                 | orf19.3487  | 14861 | IPF15880 | No significant                             | S.c. match                                                                        |                                                                          |
| CA0756 | 0.9 | 0.9 | 1.0 | IPF14859 | 3878814..3 acyl-coenzyme-A dehy             | orf19.3488  | 14859 | IPF14861 | No significant                             | S.c. match                                                                        |                                                                          |
| CA0757 | 0.9 | 1.2 | 0.9 | GAP7.3EO | 3903803..3 general amino-acid permease, 3-p |             | 11170 | IPF14859 | No significant                             | S.c. match                                                                        |                                                                          |
| CA0758 | 0.9 | 0.8 | 0.9 | PAP11    | complemer poly(A) polymerase by             | orf19.3197  | 19882 | CaGAP7.3 | Amino acid metabolism                      | CELLULAR TRANSPORT AND TRANSPORT MECHANISMS SUBCELLULAR LOCALISATION TRANSPORT FA |                                                                          |
| CA0759 | 1.3 | 1.3 | 1.1 | IPF11167 | 3907343..3 unknown function                 | orf19.3198  | 11167 | CaPAP11  | TRANSCR                                    | nucleotidyltransferase activity                                                   |                                                                          |
| CA0760 | 1.0 | 0.9 | 1.1 | IPF11161 | 3913153..3 unknown function, 3-pr           | orf19.3201  | 11161 | IPF11167 | Lipid fatty-acid and isoprenoid metabolism |                                                                                   |                                                                          |
| CA0761 | 0.9 | 1.1 | 0.9 | IPF8267  | complemer P-type ATPase                     | orf19.9146  | 8267  | IPF11161 | CELL FATI                                  | transcription regulator activity                                                  |                                                                          |
| CA0762 | 1.0 | 1.0 | 1.0 | TAF67    | 3920176..3 TFIID subunit (by hom            | orf19.9147  | 15686 | IPF8267  | TRANSP                                     | molecular_function                                                                | unknown                                                                  |
| CA0763 | 1.2 | 1.4 | 1.1 | RPL11    | complemer 60S ribosomal protein             | orf19.2232  | 9044  | CaTAF67  | TRANSCR                                    | transcription regulator activity                                                  |                                                                          |
| CA0764 | 1.0 | 0.9 | 1.0 | PRE2     | complemer 20S proteasome subu               | orf19.2233  | 9042  | CaRPL11  | PROTEIN                                    | structural molecule                                                               | activity                                                                 |
| CA0765 | 1.0 | 0.9 | 1.0 | IPF9040  | 3920176..3 complemer similar to Saccharomy  | orf19.9778  | 9040  | CaPRE2   | CELL                                       | CYC peptidase                                                                     | activity                                                                 |
| CA0766 | 0.9 | 0.9 | 0.9 | IPF15335 | 3933411..3 unknown function                 | orf19.1243  | 15335 | IPF9040  | TRANSCR                                    | DNA binding,transcription regulator                                               | activity                                                                 |
| CA0767 | 1.1 | 1.2 | 1.0 | KEM1.3   | 3936597..3 multifunctional nucleas          | orf19.1243  | 13214 | IPF15335 | No significant                             | S.c. match                                                                        |                                                                          |
| CA0768 | 1.0 | 1.0 | 1.0 | COX19    | complemer Protein required for cyto         | orf19.1243  | 13215 | CaKEM1.3 | Nucleotide                                 | DNA binding                                                                       |                                                                          |
| CA0769 | 0.8 | 1.2 | 0.7 | IPF10967 | complemer unknown function                  | orf19.2826  | 10967 | CaCOX19  | No signific                                | transporter                                                                       | activity                                                                 |
| CA0770 | 1.0 | 1.0 | 1.0 | IPF10963 | 3951799..3 similar to Saccharomy            | orf19.1034  | 10963 | IPF10967 | No significant                             | S.c. match                                                                        |                                                                          |
| CA0771 | 1.1 | 1.1 | 1.1 | IPF11977 | complemer aspartic proteinase (by           | orf19.853   | 11977 | IPF10963 | SUBCELL                                    | structural molecule                                                               | activity                                                                 |
| CA0772 | 1.0 | 1.0 | 0.9 | UGA11.EX | complemer 4-aminobutyrate aminotransferase  |             | 11976 | IPF11977 | PROTEIN                                    | FATE [folding modification destination]                                           | ""SUBCELLULAR LOCALISATION                                               |
| CA0773 | 0.9 | 0.9 | 0.7 | UGA11.EX | complemer 4-aminobutyrate aminoc            | orf19.854   | 11975 | CaUGA11. | Amino acid metabolism                      | Nitrogen and sulphur metabolism                                                   |                                                                          |
| CA0774 | 1.0 | 1.0 | 0.9 | IPF11974 | complemer unknown function                  | orf19.855   | 11974 | CaUGA11. | Amino acid                                 | transferase                                                                       | activity                                                                 |
| CA0775 | 1.0 | 1.1 | 1.1 | IFK2     | complemer probable monooxygena              | orf19.856   | 11973 | IPF11974 | No significant                             | S.c. match                                                                        |                                                                          |
| CA0777 | 1.0 | 1.0 | 1.0 | IPF11777 | 3968540..3 unknown function                 | orf19.4778  | 11777 | CaIFK2   | No significant                             | S.c. match                                                                        |                                                                          |
| CA0778 | 1.3 | 1.1 | 1.0 | IPF12884 | complemer unknown function                  | orf19.4779  | 12884 | IPF11777 | Amino acid metabolism                      | TRANSCRIPTION SUBCELLULAR LOCALISATION UNCLASSIFIED PROTEINS                      |                                                                          |
| CA0779 | 1.1 | 1.0 | 1.0 | IPF20065 | complemer similar to Saccharomy             | orf19.3491  | 20065 | IPF12884 | CELL                                       | RES molecular_function                                                            | unknown                                                                  |
| CA0780 | 0.9 | 1.0 | 0.9 | CIRT1A   | 3982286..3 transposase                      | orf19.3492  | 3762  | IPF20065 | CELL                                       | CYC DNA binding                                                                   |                                                                          |
| CA0781 | 1.0 | 0.9 | 0.9 | CAR1.3EO | 3985861..3 arginase, 3-prime end            | orf19.1141  | 16256 | CaCirt1a | No significant                             | S.c. match                                                                        |                                                                          |
| CA0782 | 0.7 | 0.6 | 1.0 | IPF16253 | 3987286..3 unknown function                 | orf19.1141  | 16253 | CaCAR1.3 | Amino acid metabolism                      | Nitrogen and sulphur metabolism                                                   | SUBCELLULAR LOCALISATION                                                 |
| CA0783 | 0.9 | 0.9 | 0.9 | ACR1     | 3990073..3 Succinate-fumarate tra           | orf19.3931  | 14601 | IPF16253 | No significant                             | S.c. match                                                                        |                                                                          |
| CA0784 | 0.9 | 0.9 | 1.0 | YUH1.3   | 3991413..3 Putative ubiquitin carb          | orf19.3930  | 14602 | CaACR1   | C-compou                                   | transporter                                                                       | activity                                                                 |
| CA0785 | 0.7 | 0.5 | 1.0 | IPF14603 | complemer unknown function                  | orf19.1141  | 14603 | CaYUH1.3 | PROTEIN                                    | FATE [folding modification destination]                                           | ""SUBCELLULAR LOCALISATION                                               |
| CA0786 | 1.1 | 0.9 | 1.0 | IPF7473  | 3996026..3 unknown function                 | orf19.2446  | 7473  | IPF14603 | UNCLASSI                                   | molecular_function                                                                | unknown                                                                  |
| CA0787 | 1.2 | 1.2 | 1.2 | IPF7472  | complemer unknown function                  | orf19.2447  | 7472  | IPF7473  | UNCLASSI                                   | molecular_function                                                                | unknown                                                                  |
| CA0788 | 1.0 | 0.9 | 0.9 | IPF14107 | complemer unknown function                  | orf19.9985  | 14107 | IPF7472  | UNCLASSI                                   | transferase                                                                       | activity                                                                 |
| CA0789 | 0.9 | 1.1 | 1.0 | ESP1     | complemer Required for sister chr           | orf19.3356  | 14196 | IPF14107 | No significant                             | S.c. match                                                                        |                                                                          |
| CA0790 | 0.9 | 1.0 | 0.9 | IPF14193 | complemer unknown function                  | orf19.3357  | 14193 | CaESP1   | CELL                                       | CYC peptidase                                                                     | activity                                                                 |
| CA0791 | 1.2 | 1.4 | 1.0 | LSC1     | complemer succinate-CoA ligase /            | orf19.3358  | 14191 | IPF14193 | UNCLASSI                                   | molecular_function                                                                | unknown                                                                  |
| CA0792 | 1.0 | 1.0 | 1.1 | DIT2     | 4015047..4 putative cytochrome              | Forf19.554  | 20066 | CaLSC1   | C-compou                                   | ligase                                                                            | activity                                                                 |
| CA0793 | 1.0 | 0.9 | 1.0 | IPF16273 | 4016707..4 similar to Saccharomy            | orf19.553   | 16273 | CaDIT2   | CELL                                       | RESCUE DEFENSE AND VIRULENCE                                                      | ""CELL FATE CONTROL OF CELLULAR ORGANIZATION                             |
| CA0794 | 1.0 | 1.0 | 1.0 | IPF15639 | 4018478..4 unknown function                 | orf19.552   | 15639 | IPF16273 | CELL                                       | RES transporter                                                                   | activity                                                                 |
| CA0795 | 0.9 | 0.8 | 0.9 | IPF15641 | complemer unknown function                  | orf19.8186  | 15641 | IPF15639 | TRANSP                                     | molecular_function                                                                | unknown                                                                  |
| CA0796 | 1.0 | 1.2 | 1.0 | ALR1     | 4025800..4 divalent cation transpo          | orf19.9175  | 13562 | IPF15641 | TRANSCRIPTION                              | SUBCELLULAR LOCALISATION                                                          |                                                                          |
| CA0797 | 1.0 | 0.9 | 0.9 | IPF13564 | 4029562..4 putative arylsulfatase           | (orf19.1608 | 13564 | CaALR1   | CELLULAF                                   | transporter                                                                       | activity                                                                 |
| CA0798 | 1.0 | 1.1 | 1.0 | IPF13565 | complemer unknown function                  | orf19.9177  | 13565 | IPF13564 | No significant                             | S.c. match                                                                        |                                                                          |
| CA0799 | 1.0 | 1.0 | 1.0 | IPF14825 | complemer unknown function                  | orf19.9178  | 13567 | IPF13565 | UNCLASSI                                   | molecular_function                                                                | unknown                                                                  |
| CA0800 | 1.0 | 0.9 | 1.0 | IPF14064 | 4037327..4 similar to Saccharomy            | orf19.3494  | 14064 | IPF14825 | No significant                             | S.c. match                                                                        |                                                                          |
| CA0801 | 1.0 | 1.2 | 1.0 | CHC1     | complemer clathrin heavy chain (b           | orf19.3496  | 14063 | IPF14064 | SUBCELL                                    | protein binding                                                                   |                                                                          |
| CA0802 | 0.9 | 0.9 | 0.9 | IPF14060 | complemer unknown function                  | orf19.3498  | 14060 | CaCHC1   | PROTEIN                                    | structural molecule                                                               | activity                                                                 |
| CA0803 | 1.0 | 0.9 | 1.0 | IFL4     | 4047742..4 unknown function                 | orf19.3512  | 12574 | IPF14060 | UNCLASSIFIED                               | PROTEINS                                                                          |                                                                          |
| CA0804 | 0.9 | 1.1 | 1.1 | BNA1     | 4049307..4 3-hydroxyanthranilic ac          | orf19.3515  | 12570 | CaIFL4   | CELL                                       | RESCUE DEFENSE AND VIRULENCE                                                      | ""SUBCELLULAR LOCALISATION                                               |
| CA0805 | 1.0 | 0.9 | 1.1 | IPF12568 | complemer unknown function                  | orf19.3516  | 12568 | CaBNA1   | Amino acid oxidoreductase                  | activity                                                                          |                                                                          |
| CA0806 | 1.0 | 1.0 | 1.0 | IPF12567 | 4050879..4 unknown function                 | orf19.3517  | 12567 | IPF12568 | No significant                             | S.c. match                                                                        |                                                                          |
| CA0807 | 1.0 | 0.9 | 0.9 | IPF12564 | 4053164..4 ADP/ATP carrier                  | orf19.3518  | 12564 | IPF12567 | UNCLASSI                                   | molecular_function                                                                | unknown                                                                  |
| CA0808 | 1.0 | 1.0 | 1.1 | SUA71    | 4054757..4 TFIIB subunit (transcri          | orf19.3519  | 12563 | IPF12564 | CELLULAF                                   | transporter                                                                       | activity                                                                 |
| CA0810 | 1.1 | 1.0 | 1.0 | RRN3     | 4062688..4 RNA polymerase I spe             | orf19.1923  | 19708 | CaSUA71  | TRANSCRIPTION                              | SUBCELLULAR LOCALISATION                                                          |                                                                          |
| CA0811 | 1.1 | 1.0 | 1.1 | IPF17625 | complemer putative cell wall protei         | orf19.1920  | 17625 | CaRRN3   | TRANSCR                                    | transcription regulator                                                           | activity                                                                 |
| CA0812 | 1.0 | 1.2 | 1.1 | IPF3348  | complemer unknown function                  | orf19.1917  | 16243 | IPF17625 | CELL                                       | RESCUE DEFENSE AND VIRULENCE                                                      | ""SUBCELLULAR LOCALISATION                                               |
| CA0813 | 1.2 | 1.0 | 0.9 | MPP10    | complemer component of the U3 s             | orf19.1915  | 16234 | IPF3348  | UNCLASSIFIED                               | PROTEINS                                                                          |                                                                          |
| CA0814 | 0.9 | 1.0 | 0.9 | IPF16233 | complemer unknown function                  | orf19.1914  | 16233 | CaMPP10  | TRANSCR                                    | molecular_function                                                                | unknown                                                                  |
| CA0815 | 0.9 | 0.9 | 0.9 | IPF16231 | 4069461..4 unknown function                 | orf19.1913  | 16231 | IPF16233 | No significant                             | S.c. match                                                                        |                                                                          |
| CA0817 | 0.9 | 1.0 | 0.7 | IPF6339  | 4087533..4 unknown function                 | orf19.1023  | 6399  | IPF16231 | No significant                             | S.c. match                                                                        |                                                                          |
| CA0819 | 1.0 | 1.0 | 1.0 | VPS1     | complemer member of the dynami              | orf19.1949  | 19610 | IPF6339  | No significant                             | S.c. match                                                                        |                                                                          |
| CA0820 | 1.0 | 1.0 | 1.0 | IPF12138 | complemer unknown function                  | orf19.1950  | 18864 | CaVPS1   | PROTEIN                                    | hydrolyase                                                                        | activity                                                                 |
| CA0821 | 1.1 | 1.1 | 1.1 | IPF16795 | 4104298..4 glycerate/formate-dehy           | orf19.2989  | 16795 | IPF12138 | UNCLASSI                                   | hydrolyase                                                                        | activity                                                                 |
| CA0822 | 1.1 | 0.9 | 1.0 | EXG1     | complemer glucan 1,3-beta-glucos            | orf19.2990  | 14073 | IPF16795 | C-compou                                   | oxidoreductase                                                                    | activity                                                                 |
| CA0823 | 1.0 | 1.0 | 0.9 | IPF11987 | 4112204..4 unknown function, 3-pr           | orf19.692   | 11987 | CaEXG1   | C-compou                                   | hydrolyase                                                                        | activity                                                                 |
| CA0824 | 1.1 | 1.3 | 1.0 | GPD2     | 4114960..4 Glycerol 3-phosphate             | orf19.691   | 11982 | IPF11987 | No significant                             | S.c. match                                                                        |                                                                          |
| CA0825 | 1.0 | 1.0 | 0.9 | PLB2     | complemer phospholipase B                   | orf19.8309  | 11981 | CaGPD2   | C-compou                                   | and carbohydrate metabolism                                                       | ""CELL RESCUE DEFENSE AND VIRULENCE ""REGULATION OF/INTERACTION WITH CEI |
| CA0826 | 0.8 | 0.9 | 0.9 | IPF19885 | 4118749..4 unknown function                 | orf19.8308  | 19885 | CaPLB2   | Lipid fatty-acid and isoprenoid metabolism | ""SUBCELLULAR LOCALISATION Other virulence attributes                             |                                                                          |
| CA0827 | 1.0 | 0.9 | 0.9 | IPF18859 | 4122110..4 unknown function                 | orf19.7884  | 18859 | IPF19885 | No significant                             | S.c. match                                                                        |                                                                          |
| CA0828 | 2.9 | 2.9 | 2.2 | IPF17186 | 4124295..4 unknown function                 | orf19.7882  | 17186 | IPF18859 | UNCLASSI                                   | molecular_function                                                                | unknown                                                                  |
| CA0829 | 0.9 | 0.7 | 1.1 | SLC1     | 4125941..4 fatty acyltransferase (b         | orf19.250   | 19886 | IPF17186 | UNCLASSI                                   | molecular_function                                                                | unknown                                                                  |

|        |     |     |     |            |                                                |       |            |                                                                                                         |
|--------|-----|-----|-----|------------|------------------------------------------------|-------|------------|---------------------------------------------------------------------------------------------------------|
| CA0830 | 1.2 | 1.0 | 1.1 | APL5       | complemer AP-3 complex subunit, orf19.7879     | 14699 | CaSLC1     | Lipid fatty-ε transferase activity                                                                      |
| CA0831 | 1.0 | 0.8 | 1.1 | IPF10493.ε | 4130615..4 unknown function, 5-prorf19.7878    | 14701 | CaAPL5     | CELLULAFmolecular_function unknown                                                                      |
| CA0832 | 0.9 | 1.0 | 1.0 | IPF14225   | complemer unknown function orf19.9244          | 14225 | IPF10493.ε | No significant S.c. match                                                                               |
| CA0833 | 0.9 | 0.9 | 1.0 | IPF12501   | 4136657..4 unknown function orf19.9245         | 12501 | IPF14225   | UNCLASSImolecular_function unknown                                                                      |
| CA0834 | 1.0 | 1.0 | 1.1 | IPF12498.ε | complemer unknown function, 3-prorf19.1677     | 12499 | IPF12501   | UNCLASSImolecular_function unknown                                                                      |
| CA0835 | 1.1 | 1.1 | 1.2 | IPF12498.ε | complemer unknown function, internal fragme    | 12498 | IPF12498.ε | No significant S.c. match                                                                               |
| CA0836 | 1.2 | 1.0 | 1.1 | IPF12495.ε | 4140843..4 unknown function, 5-prorf19.9248    | 12495 | IPF12498.ε | No significant S.c. match                                                                               |
| CA0837 | 0.7 | 0.6 | 0.9 | IPF12495.ε | 4141422..4 unknown function, 3-prime end       | 12494 | IPF12495.ε | No significant S.c. match                                                                               |
| CA0838 | 1.1 | 1.0 | 1.0 | TFF1       | complemer vacuolar ATPase subu orf19.9249      | 12493 | IPF12495.ε | No significant S.c. match                                                                               |
| CA0839 | 0.9 | 1.0 | 0.9 | IPF12492   | complemer unknown function                     | 12492 | CaTFF1     | PROTEIN IDNA binding                                                                                    |
| CA0840 | 2.2 | 2.2 | 1.8 | IFD1       | 4146777..4 Putative aryl-alcohol de orf19.8650 | 18856 | IPF12492   | PROTEIN FATE [folding modification destination] ""SUBCELLULAR LOCALISATION                              |
| CA0841 | 1.0 | 1.1 | 1.0 | IPF15638   | complemer unknown function orf19.8652          | 15638 | CaIFD1     | C-compound and carbohydrate metabolism ENERGY                                                           |
| CA0842 | 0.9 | 1.0 | 1.0 | IPF15633   | complemer similar to Saccharomy orf19.1053     | 15633 | IPF15638   | No significant S.c. match                                                                               |
| CA0843 | 1.0 | 1.1 | 1.0 | IPF18853   | complemer unknown function orf19.8656          | 18853 | IPF15633   | CELLULAFmolecular_function unknown                                                                      |
| CA0844 | 1.1 | 1.1 | 1.1 | CDC3       | complemer Cell division control prc orf19.8657 | 16098 | IPF18853   | UNCLASSImolecular_function unknown                                                                      |
| CA0845 | 1.1 | 1.1 | 1.1 | IPF16314   | complemer unknown function orf19.7896          | 16314 | CaCDC3     | CELL CYC structural molecule activity                                                                   |
| CA0846 | 0.9 | 1.0 | 1.0 | SMC3       | complemer required for structural r orf19.7895 | 12682 | IPF16314   | No significant S.c. match                                                                               |
| CA0848 | 0.2 | 0.3 | 0.1 | ACS1       | 4172674..4 acetyl-coenzyme-A sy orf19.1743     | 15005 | CaSMC3     | CELL CYC hydrolase activity                                                                             |
| CA0849 | 1.0 | 1.0 | 1.0 | HEM4       | complemer uroporphyrinogen III sy orf19.9311   | 15006 | CaACS1     | C-compour ligase activity                                                                               |
| CA0850 | 1.1 | 1.1 | 1.0 | IPF16671   | 4177044..4 unknown function orf19.9312         | 16671 | CaHEM4     | Metabolism lyase activity                                                                               |
| CA0851 | 1.0 | 0.9 | 1.0 | IPF16670   | 4177799..4 unknown function orf19.9313         | 16670 | IPF16671   | No significant S.c. match                                                                               |
| CA0852 | 1.0 | 1.0 | 1.0 | KIP2       | 4179505..4 Kinesin-related protein orf19.9315  | 10752 | IPF16670   | UNCLASSImolecular_function unknown                                                                      |
| CA0853 | 0.8 | 1.0 | 0.8 | IPF19640   | 4182073..4 unknown function orf19.9316         | 19639 | CaKIP2     | CELL CYC motor activity                                                                                 |
| CA0854 | 1.1 | 1.2 | 1.0 | IPF8854    | complemer similar to Saccharomy orf19.4900     | 8854  | IPF19640   | No significant S.c. match                                                                               |
| CA0855 | 1.0 | 0.9 | 1.0 | AMYG1      | complemer glucoamylase orf19.4899              | 8948  | IPF8854    | C-compour transferase activity                                                                          |
| CA0856 | 1.0 | 1.0 | 1.1 | IFL1       | 4203810..4 unknown function orf19.1194         | 14489 | CaAMYG1    | C-compound and carbohydrate metabolism ENERGY SUBCELLULAR LOCALISATION                                  |
| CA0857 | 1.0 | 1.0 | 0.9 | SEN15      | 4205571..4 tRNA splicing endonuc orf19.4464    | 14490 | CaIFL1     | CELL RESCUE DEFENSE AND VIRULENCE ""CELL FATE                                                           |
| CA0858 | 0.9 | 0.9 | 0.9 | IPF14493   | complemer unknown function orf19.4465          | 14493 | CaSEN15    | No significant S.c. match                                                                               |
| CA0859 | 0.9 | 1.0 | 1.0 | IPF14495.ε | complemer similar to Saccharomy orf19.1194     | 14495 | IPF14493   | No significant S.c. match                                                                               |
| CA0860 | 1.1 | 1.0 | 1.1 | IPF17272   | 4213479..4 unknown function orf19.3522         | 17272 | IPF14495.ε | PROTEIN Itransferase activity                                                                           |
| CA0861 | 1.1 | 1.0 | 1.0 | CRK1.3F    | complemer Protein kinase, 3-prime orf19.3523   | 17271 | IPF17272   | No significant S.c. match                                                                               |
| CA0862 | 1.0 | 1.0 | 1.0 | CRK1.5F    | complemer Protein kinase, 5-prime orf19.3524   | 17267 | CaCRK1.3I  | No significant S.c. match                                                                               |
| CA0863 | 1.1 | 1.0 | 1.0 | ITR2       | complemer Myo-inositol transporte orf19.3526   | 4456  | CaCRK1.5I  | CELL CYC protein kinase activity                                                                        |
| CA0864 | 0.8 | 0.9 | 0.8 | CYT1       | complemer cytochrome-c1 (by hon orf19.3527     | 4458  | CaITR2     | C-compour transporter activity                                                                          |
| CA0865 | 1.0 | 1.0 | 1.0 | IFM2       | 4224960..4 Glycerate-formate-deh orf19.3584    | 14777 | CaCYT1     | ENERGY ε transporter activity                                                                           |
| CA0866 | 1.0 | 1.0 | 1.1 | IPF14775   | complemer unknown function orf19.3585          | 14775 | CaIFM2     | C-compound and carbohydrate metabolism                                                                  |
| CA0867 | 1.0 | 0.6 | 1.0 | IPF14773.ε | complemer unknown function, exo orf19.3586     | 14774 | IPF14775   | UNCLASSImolecular_function unknown                                                                      |
| CA0869 | 1.1 | 1.1 | 1.0 | IPF14772   | 4228888..4 unknown function orf19.3589         | 14772 | IPF14773.ε | No significant S.c. match                                                                               |
| CA0870 | 1.2 | 1.7 | 1.2 | IPP1       | 4230096..4 inorganic pyrophospha orf19.3590    | 19604 | IPF14772   | CELL CYC DNA binding                                                                                    |
| CA0871 | 0.9 | 0.9 | 1.1 | APE3       | 4231613..4 aminopeptidase (by ho orf19.3591    | 16625 | CaIPP1     | Phosphate hydrolase activity                                                                            |
| CA0872 | 1.0 | 1.1 | 1.1 | IPF13100   | complemer unknown function orf19.3592          | 13100 | CaAPE3     | PROTEIN Ipeptidase activity                                                                             |
| CA0873 | 0.9 | 1.0 | 0.9 | BUL1       | 4237825..4 Ubiquitin ligase bindinç orf19.1209 | 9241  | IPF13100   | PROTEIN I chaperone activity                                                                            |
| CA0874 | 1.1 | 1.2 | 1.1 | CPA1       | 4241368..4 Arginine-specific carba orf19.1210  | 11885 | CaBUL1     | PROTEIN I protein binding                                                                               |
| CA0875 | 1.0 | 1.1 | 1.1 | ERG251     | 4244711..4 C-4 sterol methyl oxide orf19.1210  | 8993  | CaCPA1     | Amino acid ligase activity                                                                              |
| CA0876 | 1.1 | 1.3 | 1.0 | VMA6       | 4247506..4 H+-ATPase V0 domair orf19.7996      | 19887 | CaERG251   | Lipid fatty-acid and isoprenoid metabolism ""SUBCELLULAR LOCALISATION                                   |
| CA0877 | 1.1 | 1.1 | 0.9 | CNH1.5F    | 4249699..4 Na+/H+ antiporter, 5-p orf19.8000   | 10959 | CaVMA6     | PROTEIN I transporter activity                                                                          |
| CA0878 | 1.0 | 1.0 | 0.9 | CNH1.3F    | 4251525..4 Na+/H+ antiporter, 3-p orf19.8001   | 18845 | CaCNH1.5   | REGULATI transporter activity                                                                           |
| CA0879 | 0.7 | 0.8 | 0.4 | IPF19542.ε | 4252167..4 unknown function, 5-prorf19.8003    | 19542 | CaCNH1.3   | REGULATION OF/INTERACTION WITH CELLULAR ENVIRONMENT TRANSPORT FACILITATION                              |
| CA0880 | 1.0 | 1.0 | 1.0 | IPF19542.ε | 4253029..4 unknown function, 3-prorf19.372     | 16966 | IPF19542.ε | Amino acid metabolism TRANSCRIPTION SUBCELLULAR LOCALISATION                                            |
| CA0881 | 1.0 | 1.1 | 1.0 | IPF16965   | complemer unknown function orf19.8006          | 16965 | IPF19542.ε | UNCLASSImolecular_function unknown                                                                      |
| CA0882 | 1.0 | 1.1 | 1.0 | PHR3       | 4257794..4 surface glycoprotein (b orf19.8010  | 12107 | IPF16965   | CLASSIFICmolecular_function unknown                                                                     |
| CA0883 | 2.0 | 1.5 | 2.2 | SUN41      | 4266853..4 Putative cell wall beta- orf19.3642 | 14577 | CaPHR3     | CLASSIFICmolecular_function unknown                                                                     |
| CA0884 | 1.1 | 1.2 | 1.1 | CAN5       | complemer amino acid permease (orf19.3641      | 19550 | CaSUN41    | CELL CYC molecular_function unknown                                                                     |
| CA0885 | 1.0 | 0.9 | 1.2 | IPF12381   | 4273724..4 unknown function orf19.1389         | 12381 | CaCAN5     | Amino acid metabolism CELLULAR TRANSPORT AND TRANSPORT MECHANISMS SUBCELLULAR LOCALISATION TRANSPORT FA |
| CA0886 | 0.9 | 0.9 | 1.0 | IPF12382   | 4276766..4 unknown function orf19.1388         | 12382 | IPF12381   | TRANSCR RNA binding                                                                                     |
| CA0887 | 1.0 | 1.0 | 1.1 | IPF12383   | complemer unknown function orf19.1387          | 12383 | IPF12382   | SUBCELLMolecular_function unknown                                                                       |
| CA0888 | 0.9 | 0.9 | 1.0 | BET1       | 4278785..4 involved in ER-Golgi tr orf19.1386  | 12385 | IPF12383   | UNCLASSImolecular_function unknown                                                                      |
| CA0889 | 1.0 | 1.0 | 1.0 | IPF11767   | 4284439..4 mitochondrial carrier pi orf19.4733 | 11767 | CaBET1     | CELLULAF transporter activity                                                                           |
| CA0890 | 0.8 | 0.8 | 1.0 | IPF11766   | 4285793..4 unknown function orf19.4734         | 11766 | IPF11767   | CELLULAR TRANSPORT AND TRANSPORT MECHANISMS SUBCELLULAR LOCALISATION TRANSPORT FACILITATION             |
| CA0891 | 0.9 | 1.0 | 1.0 | IPF11764   | 4287107..4 unknown function orf19.4735         | 11764 | IPF11766   | PROTEIN FATE [folding modification destination]                                                         |
| CA0892 | 1.1 | 1.2 | 1.0 | PHO8.5     | 4288986..4 repressible alkaline ph orf19.4736  | 19888 | IPF11764   | UNCLASSImolecular_function unknown                                                                      |
| CA0893 | 1.0 | 1.1 | 1.1 | IPF13517   | 4294111..4 unknown function orf19.5752         | 13517 | CaPHO8.5   | Phosphate hydrolase activity                                                                            |
| CA0894 | 1.0 | 0.9 | 0.9 | ORM1       | 4296932..4 unknown function orf19.5751         | 13514 | IPF13517   | UNCLASSImolecular_function unknown                                                                      |
| CA0895 | 1.1 | 1.3 | 1.0 | SHM2       | 4299044..4 Serine hydroxymethylt orf19.5750    | 15120 | CaORM1     | UNCLASSImolecular_function unknown                                                                      |
| CA0896 | 1.0 | 1.3 | 0.9 | SBA1       | 4300930..4 Hsp90 (Ninety) Associ orf19.5749    | 15122 | CaSHM2     | Nucleotide transferase activity                                                                         |
| CA0897 | 1.0 | 0.9 | 1.0 | IPF4902    | 4304092..4 unknown function orf19.8043         | 4902  | CaSBA1     | PROTEIN I chaperone activity                                                                            |
| CA0898 | 1.1 | 1.2 | 1.1 | SSH1.3     | complemer involved in co-translati orf19.412   | 4903  | IPF4902    | No significant S.c. match                                                                               |
| CA0899 | 1.0 | 1.1 | 0.9 | IPF4905    | complemer unknown function orf19.411           | 4905  | CaSSH1.3   | PROTEIN I transporter activity                                                                          |
| CA0900 | 1.1 | 1.0 | 1.0 | IPF12031   | 4316540..4 unknown function orf19.3411         | 12031 | IPF4905    | No significant S.c. match                                                                               |
| CA0901 | 0.9 | 0.9 | 0.9 | IPF12033   | 4317758..4 unknown function orf19.3412         | 12033 | IPF12031   | Metabolism molecular_function unknown                                                                   |
| CA0902 | 0.9 | 0.9 | 1.0 | IPF12034   | complemer unknown function orf19.3413          | 12034 | IPF12033   | UNCLASSI hydrolase activity                                                                             |
| CA0903 | 0.8 | 0.9 | 0.8 | IPF4401    | 4323951..4 putative succinate deh orf19.1480   | 4401  | IPF12034   | No significant S.c. match                                                                               |

|        |     |     |     |          |                                              |            |                |                                                                                                                     |                                                                      |
|--------|-----|-----|-----|----------|----------------------------------------------|------------|----------------|---------------------------------------------------------------------------------------------------------------------|----------------------------------------------------------------------|
| CA0904 | 0.9 | 1.0 | 0.9 | IPF4403  | complemer unknown function                   | orf19.1481 | 4403 IPF4401   | ENERGY                                                                                                              | molecular_function unknown                                           |
| CA0905 | 0.9 | 0.9 | 0.9 | IPF4405  | 4328219..4 unknown function                  | orf19.1482 | 4405 IPF4403   | No significant S.c. match                                                                                           |                                                                      |
| CA0906 | 1.0 | 1.0 | 1.1 | IPF4406  | complemer unknown function                   | orf19.1483 | 4406 IPF4405   | No significant S.c. match                                                                                           |                                                                      |
| CA0907 | 1.0 | 0.9 | 1.0 | IPF19889 | 4329345..4 Unknown Function                  | orf19.1484 | 19889 IPF4406  | UNCLASSI                                                                                                            | molecular_function unknown                                           |
| CA0908 | 0.9 | 0.9 | 1.0 | MRPL31   | complemer Mitochondrial ribosome             | orf19.1485 | 6016 IPF19889  | No significant S.c. match                                                                                           |                                                                      |
| CA0910 | 1.0 | 1.1 | 1.0 | MRPL16   | 4342281..4 ribosomal protein                 | orf19.9569 | 4102 CaMRPL31  | PROTEIN                                                                                                             | :structural molecule activity                                        |
| CA0911 | 0.9 | 1.0 | 1.0 | IPF14814 | complemer unknown function                   | orf19.9568 | 14814 CaMRPL16 | PROTEIN                                                                                                             | :structural molecule activity                                        |
| CA0912 | 0.9 | 1.1 | 1.0 | RPA49    | 4344552..4 DNA-directed RNA pol              | orf19.9567 | 14813 IPF14814 | PROTEIN                                                                                                             | !molecular_function unknown                                          |
| CA0913 | 1.0 | 1.0 | 1.0 | IPF14810 | complemer unknown function                   | orf19.9566 | 14810 CaRPA49  | TRANSCR                                                                                                             | nucleotidyltransferase activity                                      |
| CA0914 | 1.1 | 1.5 | 1.1 | SRA1     | complemer cAMP dependent prote               | orf19.9565 | 19590 IPF14810 | Lipid fatty- $\epsilon$                                                                                             | molecular_function unknown                                           |
| CA0915 | 1.4 | 1.2 | 1.2 | KAR2     | 4350772..4 dnaK-type molecular c             | orf19.9564 | 15827 CaSRA1   | C-compou                                                                                                            | enzyme regulator activity                                            |
| CA0916 | 0.9 | 1.0 | 0.9 | LYS2     | complemer L-aminoadipate-semial              | orf19.2970 | 19710 CaKAR2   | CELL CYC                                                                                                            | chaperone activity                                                   |
| CA0917 | 0.9 | 1.0 | 1.1 | RAD16    | complemer nucleotide excision rep            | orf19.2969 | 15502 CaLYS2   | Amino acid oxidoreductase                                                                                           | activity                                                             |
| CA0918 | 1.0 | 0.9 | 1.1 | IPF17881 | complemer cyclin (by homology)               | orf19.1041 | 17881 CaRAD16  | CELL CYC                                                                                                            | hydrolase activity                                                   |
| CA0919 | 0.8 | 1.1 | 0.7 | POR1     | complemer mitochondrial outer me             | orf19.1042 | 12994 IPF17881 | TRANSCR                                                                                                             | protein kinase activity,enzyme regulator activity                    |
| CA0920 | 1.0 | 1.0 | 1.0 | IPF18833 | 4367748..4 unknown function                  |            | 18833 CaPOR1   | CELLULAF                                                                                                            | transporter activity                                                 |
| CA0921 | 0.9 | 1.0 | 1.0 | IPF12992 | 4368845..4 unknown function                  | orf19.1043 | 12992 IPF18833 | No significant S.c. match                                                                                           |                                                                      |
| CA0922 | 1.0 | 1.1 | 1.0 | IPF12991 | complemer unknown function                   | orf19.1045 | 12991 IPF12992 | UNCLASSI                                                                                                            | molecular_function unknown                                           |
| CA0923 | 0.8 | 1.0 | 0.9 | IPF12987 | 4370933..4 unknown function                  | orf19.1047 | 12987 IPF12991 | TRANSCR                                                                                                             | RNA binding                                                          |
| CA0924 | 2.7 | 2.2 | 2.8 | IFD5     | 4374190..4 Putative aryl-alcohol de          | orf19.1048 | 17049 IPF12987 | UNCLASSI                                                                                                            | molecular_function unknown                                           |
| CA0925 | 0.9 | 0.8 | 1.0 | IPF17050 | complemer unknown function                   | orf19.1049 | 17050 CaIFD5   | C-compound and carbohydrate metabolism                                                                              | ENERGY                                                               |
| CA0926 | 1.0 | 0.9 | 1.0 | IPF11335 | 4381652..4 Member of the phosph              | orf19.3663 | 11335 IPF17050 | ENERGY                                                                                                              |                                                                      |
| CA0927 | 1.0 | 1.1 | 1.1 | IPF11332 | 4385006..4 unknown function                  | orf19.3661 | 11332 IPF11335 | Phosphate transporter                                                                                               | activity                                                             |
| CA0928 | 1.0 | 0.9 | 0.9 | IPF19891 | 4388461..4 unknown function                  | orf19.8192 | 19891 IPF11332 | PROTEIN                                                                                                             | !peptidase activity                                                  |
| CA0929 | 0.8 | 1.0 | 0.9 | GUT1     | complemer Glycerol kinase (by ho             | orf19.558  | 3751 IPF19891  | No significant S.c. match                                                                                           |                                                                      |
| CA0930 | 1.0 | 1.0 | 1.0 | ZORRO1A  | complemer Putative reverse transcr           | orf19.559  | 3750 CaGUT1    | C-compou                                                                                                            | transferase activity                                                 |
| CA0931 | 0.9 | 1.0 | 1.1 | IPF3748  | complemer unknown function                   | orf19.562  | 3748 CaZorro1a | CELL CYCLE AND DNA PROCESSING                                                                                       | CELLULAR TRANSPORT AND TRANSPORT MECHANISMS SUBCELLULAR LOCALISATION |
| CA0932 | 1.1 | 1.0 | 1.0 | EPT1     | complemer alcohol phosphatidyl tr            | orf19.3695 | 8065 IPF3748   | CELL CYCLE AND DNA PROCESSING                                                                                       | CONTROL OF CELLULAR ORGANIZATION SUBCELLULAR LOCALISATION            |
| CA0933 | 1.0 | 1.0 | 1.0 | ATM1     | complemer ATP-binding cassette t             | orf19.8678 | 14199 CaEPT1   | Lipid fatty- $\epsilon$                                                                                             | transferase activity                                                 |
| CA0934 | 1.0 | 0.9 | 1.0 | IPF14203 | complemer similarity to several tra          | orf19.1078 | 14202 CaATM1   | CELLULAF                                                                                                            | transporter activity,hydrolase activity                              |
| CA0935 | 0.9 | 1.0 | 1.1 | IPF14203 | complemer similarity to several tra          | orf19.1079 | 14203 IPF14203 | Amino acid metabolism Nitrogen and sulphur metabolism                                                               |                                                                      |
| CA0936 | 1.0 | 1.1 | 1.1 | IPF16291 | 4422849..4 unknown function                  | orf19.1080 | 16291 IPF14203 | Amino acid transferase                                                                                              | activity                                                             |
| CA0937 | 1.1 | 0.9 | 1.0 | IPF19892 | 4425035..4 unknown function                  | orf19.8683 | 19892 IPF16291 | No significant S.c. match                                                                                           |                                                                      |
| CA0938 | 3.2 | 2.7 | 1.5 | COX12    | 4425874..4 cytochrome-c oxidase, subunit VI  |            | 16288 IPF19892 | No significant S.c. match                                                                                           |                                                                      |
| CA0939 | 0.9 | 1.0 | 1.1 | DBP6     | complemer RNA helicase required              | orf19.3704 | 8614 CaCOX12   | ENERGY "                                                                                                            | oxidoreductase activity                                              |
| CA0940 | 1.0 | 0.8 | 1.0 | IPF8616  | 4429583..4 similar to Saccharomyces cerevisi |            | 8616 CaDBP6    | TRANSCR                                                                                                             | RNA binding,helicase activity                                        |
| CA0941 | 0.9 | 0.8 | 1.0 | IPF8617  | complemer unknown function                   | orf19.3705 | 8617 IPF8616   | PROTEIN                                                                                                             | :structural molecule activity                                        |
| CA0942 | 0.9 | 1.1 | 1.1 | IPF8619  | 4432166..4 unknown function                  | orf19.3706 | 8619 IPF8617   | UNCLASSI                                                                                                            | protein phosphatase activity                                         |
| CA0943 | 0.9 | 0.9 | 0.8 | YHB1     | complemer flavohemoglobin (by hc             | orf19.3707 | 8621 IPF8619   | PROTEIN FATE [folding modification destination]                                                                     |                                                                      |
| CA0944 | 1.0 | 1.1 | 1.1 | IPF10280 | complemer unknown function                   | orf19.8852 | 10280 CaYHB1   | CELL RES                                                                                                            | molecular_function unknown                                           |
| CA0945 | 1.1 | 1.2 | 0.9 | IPF10278 | 4442823..4 DNA-J - like protein (by          | orf19.8853 | 10278 IPF10280 | No significant S.c. match                                                                                           |                                                                      |
| CA0946 | 1.0 | 1.1 | 1.1 | IPF10277 | 4444560..4 unknown function                  |            | 10277 IPF10278 | PROTEIN FATE [folding modification destination]                                                                     |                                                                      |
| CA0947 | 1.0 | 1.0 | 1.0 | CFL3     | 4445719..4 ferric reductase-like pr          | orf19.1270 | 10273 IPF10277 | UNCLASSI                                                                                                            | molecular_function unknown                                           |
| CA0948 | 0.9 | 0.9 | 1.0 | IPF10270 | complemer unknown function                   | orf19.1272 | 10270 CaCFL3   | REGULATION OF/INTERACTION WITH CELLULAR ENVIRONMENT                                                                 | Other virulence attributes                                           |
| CA0949 | 1.0 | 1.0 | 0.9 | IPF10269 | 4450250..4 Gim complex compone               | orf19.8859 | 10269 IPF10270 | UNCLASSI                                                                                                            | molecular_function unknown                                           |
| CA0950 | 1.0 | 1.0 | 1.0 | IPF3737  | complemer similar to Saccharomy              | orf19.1012 | 3737 IPF10269  | CELL CYC                                                                                                            | protein binding                                                      |
| CA0951 | 1.1 | 1.0 | 0.9 | MNN6     | 4458347..4 putative golgi alpha-1,;          | orf19.1011 | 3740 IPF3737   | PROTEIN                                                                                                             | !protein binding                                                     |
| CA0952 | 1.0 | 1.1 | 1.0 | MNT3.3E  | complemer Putative mannosyltransferase, 3-p  |            | 19564 CaMNN6   | CELL FATI                                                                                                           | transferase activity                                                 |
| CA0953 | 1.2 | 1.4 | 1.1 | IPF13166 | 4462120..4 unknown function, 3-pr            | orf19.1144 | 13166 CaMNT3.3 | C-compound and carbohydrate metabolism ""PROTEIN FATE [folding modification destination] ""SUBCELLULAR LOCALISATION |                                                                      |
| CA0954 | 1.0 | 0.9 | 1.0 | IPF13162 | 4468223..4 unknown function                  | orf19.1142 | 13162 IPF13166 | C-compound and carbohydrate metabolism                                                                              |                                                                      |
| CA0955 | 1.0 | 1.0 | 1.0 | IPF13160 | complemer unknown function                   | orf19.1140 | 13160 IPF13162 | UNCLASSI                                                                                                            | transporter activity                                                 |
| CA0956 | 1.0 | 1.1 | 1.0 | IPF14914 | 4484183..4 putative ankyrin (by ho           | orf19.1219 | 14914 IPF13160 | UNCLASSIFIED                                                                                                        | PROTEINS                                                             |
| CA0957 | 0.9 | 1.0 | 1.0 | IPF14322 | 4489509..4 unknown function                  |            | 14322 IPF14914 | UNCLASSI                                                                                                            | hydrolase activity                                                   |
| CA0958 | 1.0 | 1.0 | 1.1 | SEC24    | complemer component of COPII $\alpha$        | orf19.1219 | 14321 IPF14322 | UNCLASSI                                                                                                            | molecular_function unknown                                           |
| CA0959 | 1.6 | 1.3 | 1.4 | SAM2     | complemer S-adenosylmethionine               | orf19.657  | 15535 CaSEC24  | CELLULAF                                                                                                            | protein binding                                                      |
| CA0960 | 1.1 | 1.0 | 1.0 | DPP1     | complemer Diacylglycerol Pyropho             | orf19.8271 | 5432 CaSAM2    | Amino acid transferase                                                                                              | activity                                                             |
| CA0961 | 0.9 | 1.1 | 1.0 | IPF18822 | 4509850..4 unknown function                  | orf19.3720 | 18822 CaDPP1   | Lipid fatty-acid and isoprenoid metabolism ""CELL CYCLE AND DNA PROCESSING                                          | CELL FATE                                                            |
| CA0962 | 1.1 | 1.1 | 1.0 | IPF9145  | complemer unknown function                   | orf19.6245 | 9145 IPF18822  | C-compound and carbohydrate metabolism                                                                              | CELL CYCLE AND DNA PROCESSING CELLULAR TRANSPORT AND TRANSPORT MECH. |
| CA0963 | 1.0 | 1.0 | 1.0 | IPF9143  | complemer similar to Saccharomy              | orf19.6246 | 9143 IPF9145   | No significant S.c. match                                                                                           |                                                                      |
| CA0964 | 1.1 | 1.0 | 0.9 | IPF9141  | complemer similar to Saccharomy              | orf19.6247 | 9141 IPF9143   | PROTEIN                                                                                                             | !transferase activity                                                |
| CA0965 | 1.0 | 1.0 | 1.1 | IPF9139  | 4524296..4 unknown function                  | orf19.6248 | 9139 IPF9141   | CELL CYC                                                                                                            | DNA binding                                                          |
| CA0966 | 1.0 | 1.1 | 1.0 | IPF9136  | 4526750..4 potassium transporter,            | orf19.6249 | 9136 IPF9139   | No significant S.c. match                                                                                           |                                                                      |
| CA0968 | 0.9 | 1.0 | 1.0 | SAP6     | 4534813..4 secreted aspartyl prote           | orf19.1298 | 12747 IPF9136  | CELL RESCUE DEFENSE AND VIRULENCE ""TRANSPORT FACILITATION                                                          |                                                                      |
| CA0969 | 1.0 | 1.0 | 1.0 | IPF9132  | 4538352..4 unknown function                  | orf19.1298 | 9132 CaSAP6    | PROTEIN FATE [folding modification destination] ""CELL FATE                                                         | SUBCELLULAR LOCALISATION Other virulence attributes                  |
| CA0970 | 0.9 | 0.9 | 0.9 | IPF10894 | complemer unknown function                   | orf19.1034 | 10894 IPF9132  | UNCLASSI                                                                                                            | molecular_function unknown                                           |
| CA0971 | 1.1 | 1.1 | 0.9 | IPF11428 | complemer unknown function                   | orf19.6470 | 11428 IPF10894 | CELLULAF                                                                                                            | protein binding                                                      |
| CA0972 | 1.5 | 1.7 | 1.1 | CYP1     | 4559821..4 cyclophilin (peptidylpro          | orf19.6472 | 17713 IPF11428 | CELL RESCUE DEFENSE AND VIRULENCE ""REGULATION OF/INTERACTION WITH CELLULAR ENVIRONMENT                             | SUBCELLULAR LC                                                       |
| CA0973 | 1.0 | 1.0 | 1.0 | IPF12662 | complemer unknown function                   | orf19.6474 | 12662 CaCYP1   | PROTEIN                                                                                                             | !isomerase activity                                                  |
| CA0975 | 1.0 | 1.1 | 1.0 | IPF18811 | complemer unknown function                   |            | 18811 IPF12662 | No significant S.c. match                                                                                           |                                                                      |
| CA0976 | 0.7 | 0.6 | 1.0 | PEX17    | 4567179..4 Peroxisomal periphera             | orf19.1108 | 17165 IPF18811 | No significant S.c. match                                                                                           |                                                                      |
| CA0977 | 1.0 | 0.9 | 0.9 | IPF18810 | 4568339..4 unknown function                  | orf19.1108 | 18810 CaPEX17  | No significant S.c. match                                                                                           |                                                                      |
| CA0978 | 1.0 | 1.0 | 1.0 | IPF16222 | 4570643..4 unknown function                  | orf19.3603 | 16222 IPF18810 | UNCLASSI                                                                                                            | molecular_function unknown                                           |

|        |     |     |     |            |                                     |             |       |            |                                                 |                                                                      |                                                   |
|--------|-----|-----|-----|------------|-------------------------------------|-------------|-------|------------|-------------------------------------------------|----------------------------------------------------------------------|---------------------------------------------------|
| CA0979 | 0.7 | 0.5 | 0.9 | IPF19713   | 4573238..4 unknown function         | orf19.3601  | 19713 | IPF16222   | UNCLASSI                                        | molecular_function                                                   | unknown                                           |
| CA0980 | 1.0 | 0.9 | 0.9 | IPF17655   | 4575038..4 unknown function         | orf19.3600  | 17655 | IPF19713   | CELL                                            | CYCLE AND DNA PROCESSING CONTROL OF CELLULAR ORGANIZATION            |                                                   |
| CA0981 | 1.0 | 0.9 | 0.9 | GAP4       | complemer general amino acid per    | orf19.1799  | 19644 | IPF17655   | No significant S.c. match                       |                                                                      |                                                   |
| CA0982 | 1.0 | 1.0 | 1.0 | IPF7397    | complemer unknown function          | orf19.1800  | 7397  | CaGAP4     | Amino acid metabolism                           | CELLULAR TRANSPORT AND TRANSPORT MECHANISMS SUBCELLULAR LOCALISATION | TRANSPORT FA                                      |
| CA0983 | 1.0 | 1.1 | 1.0 | CBR1       | complemer Cytochrome-b5 reduct      | orf19.1801  | 7398  | IPF7397    | UNCLASSI                                        | molecular_function                                                   | unknown                                           |
| CA0984 | 1.0 | 1.0 | 0.9 | IPF7400    | complemer unknown function          | orf19.1802  | 7400  | CaCBR1     | ENERGY                                          | transporter activity                                                 |                                                   |
| CA0985 | 1.0 | 1.0 | 1.1 | IPF4815    | 4598955..4 unknown Function         | orf19.3351  | 4815  | IPF7400    | UNCLASSI                                        | molecular_function                                                   | unknown                                           |
| CA0986 | 1.1 | 1.1 | 1.0 | IPF4814    | complemer similar to Saccharomy     | orf19.3350  | 4814  | IPF4815    | No significant S.c. match                       |                                                                      |                                                   |
| CA0987 | 1.1 | 1.1 | 1.1 | RPB140     | 4601325..4 DNA-dependent RNA        | orf19.3349  | 4811  | IPF4814    | PROTEIN                                         | structural molecule activity                                         |                                                   |
| CA0988 | 1.1 | 1.2 | 1.3 | PMI40      | complemer mannose-6-phosphate       | orf19.8968  | 19894 | CaRPB140   | TRANSCR                                         | nucleotidyltransferase activity                                      |                                                   |
| CA0989 | 1.0 | 1.0 | 1.0 | IPF11069   | 4610365..4 unknown function         | orf19.1391  | 11069 | CaPMI40    | C-compour                                       | isomerase activity                                                   |                                                   |
| CA0990 | 1.0 | 0.8 | 1.1 | IPF11068   | complemer unknown function          | orf19.1392  | 11068 | IPF11069   | No significant S.c. match                       |                                                                      |                                                   |
| CA0991 | 0.8 | 0.7 | 1.0 | IPF11065   | complemer unknown function          | orf19.8971  | 11065 | IPF11068   | PROTEIN                                         | oxidoreductase activity, isomerase activity                          |                                                   |
| CA0992 | 1.0 | 0.9 | 1.0 | IPF11063   | 4615600..4 unknown function         | orf19.8972  | 11063 | IPF11065   | Metabolism                                      | transporter activity                                                 |                                                   |
| CA0993 | 1.1 | 1.1 | 1.0 | IPF11059   | 4618933..4 unknown function         | orf19.8973  | 11059 | IPF11063   | UNCLASSI                                        | molecular_function                                                   | unknown                                           |
| CA0994 | 1.0 | 1.0 | 1.1 | IPF10077   | complemer 3-oxoacid CoA-transfe     | orf19.2281  | 10077 | IPF11059   | No significant S.c. match                       |                                                                      |                                                   |
| CA0995 | 0.9 | 1.0 | 1.0 | IPF10074   | complemer unknown function          | orf19.9822  | 10074 | IPF10077   | No significant S.c. match                       |                                                                      |                                                   |
| CA0996 | 1.0 | 1.0 | 1.0 | IPF10071   | complemer catabolic 3-dehydroqui    | orf19.9823  | 10071 | IPF10074   | No significant S.c. match                       |                                                                      |                                                   |
| CA0997 | 1.0 | 1.0 | 0.9 | IPF9998    | 4626016..4 unknown function         | orf19.9824  | 9998  | IPF10071   | No significant S.c. match                       |                                                                      |                                                   |
| CA0998 | 0.9 | 0.9 | 1.0 | IPF12369   | 4630065..4 Putative dipeptidase (t  | orf19.1184  | 12369 | IPF9998    | No significant S.c. match                       |                                                                      |                                                   |
| CA0999 | 1.0 | 1.1 | 1.1 | IPF12368   | complemer unknown function          | orf19.1184  | 12368 | IPF12369   | UNCLASSIFIED                                    | PROTEINS                                                             |                                                   |
| CA1000 | 0.4 | 0.6 | 0.4 | IPF6011    | complemer unknown function          | orf19.9061  | 6011  | IPF12368   | TRANSCRIPTION                                   |                                                                      |                                                   |
| CA1001 | 1.0 | 1.0 | 1.1 | IPF6006    | complemer unknown function          | orf19.9065  | 6006  | IPF6011    | No significant S.c. match                       |                                                                      |                                                   |
| CA1002 | 0.8 | 1.0 | 0.8 | ROK1.3     | 4651226..4 RNA helicase, 3-prime    | orf19.3756  | 8903  | IPF6006    | No significant S.c. match                       |                                                                      |                                                   |
| CA1003 | 0.9 | 1.0 | 1.0 | ATP20      | complemer F1FO-ATPase complex       | orf19.3757  | 8902  | CaROK1.3   | TRANSCR                                         | RNA binding, helicase activity                                       |                                                   |
| CA1004 | 1.0 | 1.0 | 0.9 | IPF8901    | complemer unknown function          | orf19.3758  | 8901  | CaATP20    | ENERGY                                          | structural molecule activity                                         |                                                   |
| CA1005 | 0.9 | 0.8 | 0.9 | LPG7       | 4656011..4 probable membrane pr     | orf19.3759  | 8898  | IPF8901    | UNCLASSI                                        | molecular_function                                                   | unknown                                           |
| CA1007 | 1.0 | 1.0 | 1.0 | DLH1.3F    | 4657823..4 meiotic recombination    | orf19.3760  | 8895  | CaLPG7     | TRANSCR                                         | transcription regulator activity                                     |                                                   |
| CA1008 | 1.0 | 1.0 | 1.0 | IPF14083   | complemer similarity to Saccharon   | orf19.6254  | 14083 | CaDLH1.3f  | CELL                                            | CYC DNA binding                                                      |                                                   |
| CA1009 | 0.9 | 0.9 | 1.0 | IPF14084   | complemer unknown function          | orf19.6255  | 14084 | IPF14083   | UNCLASSI                                        | transporter activity                                                 |                                                   |
| CA1010 | 0.8 | 0.8 | 0.7 | GLT1.3EO   | complemer glutamate synthase (N     | orf19.6257  | 19715 | IPF14084   | UNCLASSI                                        | molecular_function                                                   | unknown                                           |
| CA1011 | 1.1 | 1.1 | 1.1 | SRP101     | 4673540..4 signal recognition parti | orf19.1143  | 19895 | CaGLT1.3e  | Amino acid oxidoreductase activity              |                                                                      |                                                   |
| CA1012 | 1.1 | 1.0 | 1.1 | PSD2.5F    | 4675908..4 phosphatidylserine dec   | orf19.1143  | 14208 | CaSRP101   | PROTEIN FATE [folding modification destination] | ""                                                                   | SUBCELLULAR LOCALISATION                          |
| CA1014 | 0.9 | 1.1 | 1.0 | MES1       | complemer methionyl-tRNA synthe     | orf19.1143  | 15550 | CaPSD2.5f  | Lipid fatty-ε                                   | lyase activity                                                       |                                                   |
| CA1015 | 0.9 | 0.9 | 1.0 | IPF15547   | 4682821..4 putative glutamyl-tRNA   | orf19.1143  | 15547 | CaMES1     | PROTEIN                                         | ligase activity                                                      |                                                   |
| CA1016 | 1.0 | 1.0 | 0.9 | IPF11142   | complemer unknown function          | orf19.473   | 11142 | IPF15547   | Nitrogen                                        | hydrolase activity                                                   |                                                   |
| CA1017 | 1.0 | 1.0 | 1.1 | IPF11144   | complemer unknown function          | orf19.8105  | 11144 | IPF11142   | CELL                                            | RES transporter activity                                             |                                                   |
| CA1018 | 0.9 | 0.9 | 0.9 | IPF13479.ε | 4696683..4 unknown function, 3-pr   | orf19.3768  | 13479 | IPF11144   | UNCLASSI                                        | molecular_function                                                   | unknown                                           |
| CA1019 | 1.0 | 1.1 | 1.2 | IPF13485   | 4700804..4 unknown function         | orf19.3769  | 13485 | IPF13479.ε | C-compound and carbohydrate metabolism          | TRANSCRIPTION                                                        | SUBCELLULAR LOCALISATION                          |
| CA1020 | 1.3 | 1.0 | 1.1 | IPF4824    | complemer unknown function          | orf19.1086  | 4824  | IPF13485   | TRANSPO                                         | molecular_function                                                   | unknown                                           |
| CA1022 | 0.9 | 1.2 | 0.6 | IPF4820    | complemer putativecomplex I inter   | orf19.1086  | 4820  | IPF4824    | UNCLASSI                                        | molecular_function                                                   | unknown                                           |
| CA1023 | 1.0 | 1.0 | 1.1 | IPF4817    | 4722193..4 unknown Function         | orf19.1086  | 4817  | IPF4820    | No significant S.c. match                       |                                                                      |                                                   |
| CA1024 | 0.9 | 0.9 | 0.9 | CAR1       | complemer arginase by homology      | orf19.3934  | 10187 | IPF4817    | CLASSIFICATION NOT YET CLEAR-CUT                |                                                                      |                                                   |
| CA1025 | 0.5 | 0.3 | 0.8 | IPF10184   | 4728318..4 unknown function         | orf19.3936  | 10184 | CaCAR1     | Amino acid hydrolase activity                   |                                                                      |                                                   |
| CA1026 | 1.1 | 0.9 | 1.0 | IPF19645.ε | 4732034..4 unknown function, exo    | orf19.3937  | 19646 | IPF10184   | UNCLASSI                                        | molecular_function                                                   | unknown                                           |
| CA1027 | 0.8 | 0.9 | 0.8 | IPF19645.ε | 4732648..4 unknown function, exon 2 |             | 19645 | IPF19645.ε | UNCLASSIFIED                                    | PROTEINS                                                             |                                                   |
| CA1028 | 1.0 | 0.9 | 0.9 | IPF6488    | 4743360..4 unknown function         | orf19.1539  | 6488  | IPF19645.ε | UNCLASSI                                        | molecular_function                                                   | unknown                                           |
| CA1029 | 0.1 | 0.6 | 0.2 | TLG2       | 4746077..4 Syntaxin family of t-SN  | orf19.9112  | 14397 | IPF6488    | No significant S.c. match                       |                                                                      |                                                   |
| CA1030 | 1.1 | 1.4 | 1.2 | ZRC1       | complemer Zinc and cadmium resi     | orf19.9111  | 14395 | CaTLG2     | PROTEIN                                         | I transporter activity                                               |                                                   |
| CA1031 | 0.9 | 1.0 | 1.0 | IPF17469   | 4752283..4 unknown function         | orf19.3848  | 17469 | CaZRC1     | CELLULAF                                        | transporter activity                                                 |                                                   |
| CA1032 | 1.0 | 0.9 | 1.1 | IPF19896   | complemer unknown function          | orf19.3852  | 19896 | IPF17469   | No significant S.c. match                       |                                                                      |                                                   |
| CA1033 | 1.0 | 0.9 | 1.0 | MAD2       | complemer spindle checkpoint con    | orf19.8642  | 17891 | IPF19896   | No significant S.c. match                       |                                                                      |                                                   |
| CA1034 | 1.0 | 1.0 | 1.0 | BET4.EXO   | 4776433..4 alpha subunit of gera    | orf19.8641  | 17890 | CaMAD2     | CELL                                            | CYC molecular_function                                               | unknown                                           |
| CA1035 | 1.0 | 0.9 | 1.0 | IFI2.3F    | complemer unknown function, 3-pr    | orf19.1038  | 13751 | CaBET4.e   | Lipid fatty-ε                                   | transferase activity                                                 |                                                   |
| CA1037 | 1.0 | 1.0 | 1.1 | MNS1       | complemer Alpha 1,2-mannosidase     | orf19.8638  | 6163  | CaIFI2.3f  | No significant S.c. match                       |                                                                      |                                                   |
| CA1038 | 0.9 | 0.7 | 1.0 | IPF6159    | 4784798..4 unknown function         | orf19.8637  | 6159  | CaMNS1     | C-compour                                       | hydrolase activity                                                   |                                                   |
| CA1039 | 1.0 | 1.0 | 1.0 | IPF4012    | 4791807..4 Unknown Function         | orf19.2501  | 4012  | IPF6159    | TRANSCR                                         | DNA binding, transcription regulator activity                        |                                                   |
| CA1040 | 0.9 | 1.0 | 0.9 | IPF4010    | complemer unknown function          | orf19.2503  | 4010  | IPF4012    | UNCLASSI                                        | molecular_function                                                   | unknown                                           |
| CA1041 | 1.0 | 0.9 | 0.8 | BMS1       | 4795951..4 probable membrane pr     | orf19.2504  | 4009  | IPF4010    | No significant S.c. match                       |                                                                      |                                                   |
| CA1042 | 1.1 | 1.2 | 1.0 | IPF18784   | 4802829..4 unknown function         | orf19.2506  | 18784 | CaBMS1     | TRANSCRIPTION                                   |                                                                      |                                                   |
| CA1043 | 0.9 | 0.9 | 0.9 | TOM6       | complemer mitochondrial outer me    | orf19.9219  | 15801 | IPF18784   | No significant S.c. match                       |                                                                      |                                                   |
| CA1044 | 1.1 | 1.1 | 1.1 | RNA1       | 4804962..4 GTPase activating prol   | orf19.9218  | 11621 | CaTOM6     | PROTEIN                                         | I transporter activity                                               |                                                   |
| CA1045 | 0.9 | 0.9 | 0.9 | IPF11620   | 4806328..4 similar to Saccharomy    | orf19.1648  | 11620 | CaRNA1     | TRANSCR                                         | enzyme regulator activity                                            |                                                   |
| CA1046 | 0.9 | 0.9 | 0.9 | IPF11617   | complemer unknown function          | orf19.1647  | 11617 | IPF11620   | CELL                                            | CYC protein binding                                                  |                                                   |
| CA1047 | 1.1 | 1.0 | 1.1 | IPF11615   | 4811687..4 RNA-binding proteins     | (orf19.9215 | 11615 | IPF11617   | CELL                                            | CYC transferase activity                                             |                                                   |
| CA1048 | 1.0 | 1.0 | 1.1 | IPF15394   | complemer unknown function          | orf19.3899  | 15394 | IPF11615   | CLASSIFIC                                       | RNA binding                                                          |                                                   |
| CA1049 | 1.0 | 0.9 | 0.9 | TLG1       | 4818309..4 tSNARE that affects a    | orf19.3898  | 15393 | IPF15394   | UNCLASSI                                        | DNA binding                                                          |                                                   |
| CA1050 | 1.0 | 0.9 | 0.9 | IPF19897   | complemer unknown function          | orf19.3897  | 19897 | CaTLG1     | PROTEIN                                         | I transporter activity                                               |                                                   |
| CA1051 | 1.3 | 1.0 | 1.1 | CHT2       | 4824049..4 chitinase 2 precursor    | orf19.3895  | 15860 | IPF19897   | No significant S.c. match                       |                                                                      |                                                   |
| CA1052 | 0.9 | 1.0 | 1.0 | IPF15861   | 4826085..4 unknown function         | orf19.3894  | 15861 | CaCHT2     | C-compound and carbohydrate metabolism          | CELL                                                                 | CYCLE AND DNA PROCESSING SUBCELLULAR LOCALISATION |
| CA1053 | 0.9 | 1.0 | 1.0 | SCW11.3E   | complemer glucanase gene family     | orf19.3893  | 15862 | IPF15861   | No significant S.c. match                       |                                                                      |                                                   |
| CA1054 | 0.9 | 0.9 | 1.0 | SAS3       | 4831154..4 silencing protein (by hc | orf19.2540  | 16878 | CaSCW11.   | CLASSIFIC                                       | hydrolase activity                                                   |                                                   |

|        |     |     |     |            |                                                 |              |                  |                                                                                                                   |
|--------|-----|-----|-----|------------|-------------------------------------------------|--------------|------------------|-------------------------------------------------------------------------------------------------------------------|
| CA1055 | 1.1 | 1.0 | 1.0 | IPF17504   | complemer unknown function                      | orf19.2541   | 17504 CaSAS3     | TRANSCR transferase activity                                                                                      |
| CA1056 | 1.0 | 1.0 | 0.9 | IPF17503   | 4835212..4 protein folding and stal             | orf19.2542   | 17503 IPF17504   | UNCLASSI molecular_function unknown                                                                               |
| CA1057 | 0.7 | 0.5 | 0.9 | IPF17031   | 4836330..4 unknown function                     | orf19.2544   | 17031 IPF17503   | PROTEIN FATE [folding modification destination]                                                                   |
| CA1058 | 1.1 | 1.0 | 1.0 | DOT6       | complemer involved in derepressic               | orf19.2545   | 19898 IPF17031   | UNCLASSI hydrolase activity                                                                                       |
| CA1059 | 1.0 | 1.0 | 1.0 | TRP2       | complemer anthranilate synthase                 | (orf19.1008) | 13684 CaDOT6     | TRANSCR molecular_function unknown                                                                                |
| CA1060 | 0.9 | 1.0 | 1.0 | IPF11460   | complemer unknown function                      | orf19.267    | 11460 CaTRP2     | Amino acid lyase activity                                                                                         |
| CA1061 | 1.0 | 1.1 | 1.0 | IPF19720.4 | 4860128..4 unknown function, 3-pr               | orf19.1211   | 19720 IPF11460   | TRANSCR DNA binding                                                                                               |
| CA1062 | 1.0 | 1.0 | 1.0 | IPF14165   | complemer unknown function                      | orf19.4642   | 14165 IPF19720.4 | No significant S.c. match                                                                                         |
| CA1063 | 0.9 | 0.9 | 1.0 | NMT1       | 4866803..4 N-myristoyltransferase               | orf19.4641   | 15592 IPF14165   | No significant S.c. match                                                                                         |
| CA1064 | 0.9 | 1.1 | 0.9 | PWP1       | 4868492..4 beta-transducin super                | orf19.1211   | 15595 CaNMT1     | Lipid fatty-ε transferase activity                                                                                |
| CA1065 | 1.0 | 1.0 | 1.0 | IPF9002    | complemer unknown function                      | orf19.1210   | 9002 CaPWP1      | UNCLASSI molecular_function unknown                                                                               |
| CA1066 | 1.1 | 1.1 | 1.0 | IPF9001    | 4871411..4 unknown function                     | orf19.1210   | 9001 IPF9002     | No significant S.c. match                                                                                         |
| CA1067 | 2.3 | 2.5 | 2.9 | HXT62      | 4876157..4 sugar transporter                    | orf19.2023   | 4109 IPF9001     | UNCLASSI molecular_function unknown                                                                               |
| CA1069 | 1.2 | 1.4 | 1.2 | HXT5.3F    | 4880221..4 sugar transporter, 3-pr              | orf19.2021   | 18773 CaHXT62    | C-compour transporter activity                                                                                    |
| CA1070 | 1.5 | 2.5 | 1.1 | HXT61      | 4881908..4 sugar transporter                    | orf19.2020   | 4104 CaHXT5.3f   | C-compound and carbohydrate metabolism CELLULAR TRANSPORT AND TRANSPORT MECHANISMS SUBCELLULAR LOCALISATIO        |
| CA1071 | 1.0 | 0.9 | 0.9 | IPF16624   | complemer unknown function                      | orf19.2534   | 16624 CaHXT61    | C-compour transporter activity                                                                                    |
| CA1072 | 1.0 | 1.0 | 1.1 | SBH1       | 4891168..4 involved in translocation into the E |              | 4995 IPF16624    | UNCLASSI molecular_function unknown                                                                               |
| CA1073 | 1.0 | 1.0 | 1.0 | PRORS.3F   | complemer prolyl-tRNA synthetase                | orf19.2533   | 4994 CaSBH1      | PROTEIN t transporter activity                                                                                    |
| CA1074 | 1.0 | 1.0 | 1.0 | PRORS.5F   | complemer prolyl-tRNA synthetase                | orf19.2532   | 4992 CaPRORS     | PROTEIN t ligase activity                                                                                         |
| CA1075 | 1.9 | 1.6 | 1.0 | IPF4991    | complemer putative membrane prc                 | orf19.2531   | 4991 CaPRORS     | PROTEIN SYNTHESIS                                                                                                 |
| CA1076 | 0.7 | 0.4 | 1.1 | IPF19721   | complemer similar to Saccharomy                 | orf19.2239   | 19721 IPF4991    | CELLULAR TRANSPORT AND TRANSPORT MECHANISMS SUBCELLULAR LOCALISATION                                              |
| CA1077 | 1.0 | 1.0 | 1.0 | IPF13694   | complemer unknown function                      | orf19.2238   | 13694 IPF19721   | CELL CYC enzyme regulator activity                                                                                |
| CA1078 | 0.9 | 0.9 | 1.0 | SPR1       | complemer exo-1,3-beta-glucanas                 | orf19.2237   | 19900 IPF13694   | CELL CYCLE AND DNA PROCESSING                                                                                     |
| CA1079 | 1.0 | 0.9 | 0.9 | LIP1       | 4913733..4 Secretory lipase                     | orf19.4821   | 14712 CaSPR1     | C-compound and carbohydrate metabolism CELL FATE SUBCELLULAR LOCALISATION                                         |
| CA1080 | 1.0 | 1.0 | 1.0 | IPF14710   | complemer unknown function                      | orf19.4820   | 14710 CaLIP1     | Other virulence attributes                                                                                        |
| CA1081 | 1.0 | 1.0 | 1.1 | IPF14797.4 | complemer unknown function, 3-prime end         |              | 14799 IPF14710   | UNCLASSI molecular_function unknown                                                                               |
| CA1082 | 0.9 | 0.9 | 1.0 | IPF14797   | complemer unknown function                      | orf19.4818   | 14797 IPF14797.4 | No significant S.c. match                                                                                         |
| CA1083 | 1.0 | 0.9 | 1.0 | IPF1034    | complemer Similarity to transcript              | orf19.1204   | 1034 IPF14797    | No significant S.c. match                                                                                         |
| CA1084 | 0.9 | 0.8 | 0.9 | IPF1036    | complemer unknown function                      | orf19.4571   | 1036 IPF1034     | TRANSCRIPTION                                                                                                     |
| CA1085 | 0.8 | 0.9 | 0.8 | IPF1038    | complemer unknown function                      | orf19.4570   | 1038 IPF1036     | No significant S.c. match                                                                                         |
| CA1086 | 0.9 | 1.0 | 1.0 | IPF1039    | 4932510..4 unknown function                     | orf19.1203   | 1039 IPF1038     | No significant S.c. match                                                                                         |
| CA1087 | 1.0 | 1.0 | 0.9 | MYO5       | complemer Myosin I (by homology)                | orf19.8357   | 14461 IPF1039    | No significant S.c. match                                                                                         |
| CA1088 | 0.9 | 1.1 | 0.9 | IPF13319   | complemer unknown function                      | orf19.740    | 13319 CaMYO5     | CELLULAF motor activity                                                                                           |
| CA1089 | 1.0 | 0.9 | 0.9 | IPF13799   | 4947538..4 unknown function                     | orf19.3945   | 13799 IPF13319   | TRANSCRIPTION SUBCELLULAR LOCALISATION                                                                            |
| CA1090 | 0.8 | 0.9 | 0.9 | COX18      | complemer protein required for act              | orf19.3946   | 13798 IPF13799   | UNCLASSI molecular_function unknown                                                                               |
| CA1091 | 1.0 | 0.8 | 0.9 | SPT4       | 4950243..4 transcription elongator              | orf19.3947   | 13796 CaCOX18    | ENERGY " molecular_function unknown                                                                               |
| CA1092 | 1.1 | 1.1 | 1.0 | YTA7       | complemer 26S proteasome subur                  | orf19.3949   | 13795 CaSPT4     | CELL CYC transcription regulator activity                                                                         |
| CA1093 | 1.1 | 1.1 | 1.0 | MSM1       | complemer mitochondrial methionyl               | orf19.3950   | 19722 CaYTA7     | PROTEIN I hydrolase activity                                                                                      |
| CA1094 | 0.9 | 0.8 | 1.0 | YIP1       | complemer golgi membrane protei                 | orf19.3951   | 16770 CaMSM1     | PROTEIN t ligase activity                                                                                         |
| CA1095 | 1.1 | 1.0 | 1.0 | SMC1       | 4962077..4 Chromosomal ATPase                   | orf19.4367   | 7580 CaYIP1      | CELLULAF molecular_function unknown                                                                               |
| CA1096 | 0.9 | 1.0 | 0.9 | IPF7578    | complemer unknown function                      | orf19.4366   | 7578 CaSMC1      | CELL CYC DNA binding                                                                                              |
| CA1097 | 1.0 | 1.0 | 1.0 | IPF7575    | 4969468..4 putative endo-exonuct                | orf19.4365   | 7575 IPF7578     | No significant S.c. match                                                                                         |
| CA1098 | 1.1 | 1.0 | 1.0 | IPF12316   | complemer unknown function                      |              | 12316 IPF7575    | TRANSCRIPTION SUBCELLULAR LOCALISATION                                                                            |
| CA1099 | 1.1 | 1.1 | 1.0 | IPF12312   | complemer unknown function                      | orf19.1253   | 12312 IPF12316   | No significant S.c. match                                                                                         |
| CA1100 | 1.3 | 1.1 | 1.0 | IPF5681    | complemer unknown function                      | orf19.1241   | 5681 IPF12312    | No significant S.c. match                                                                                         |
| CA1101 | 1.1 | 1.1 | 1.0 | IPF5678    | complemer Unknown function                      | orf19.1241   | 5678 IPF5681     | No significant S.c. match                                                                                         |
| CA1102 | 0.9 | 1.0 | 1.0 | AKR1       | 4994071..4 ankyrin repeat-containi              | orf19.4950   | 5675 IPF5678     | No significant S.c. match                                                                                         |
| CA1103 | 0.9 | 0.9 | 0.9 | IPF5673    | 4997664..4 similar to Saccharomy                | orf19.1241   | 5673 CaAKR1      | REGULATI transferase activity                                                                                     |
| CA1104 | 1.1 | 1.0 | 1.1 | IPF18761   | complemer unknown function                      |              | 18761 IPF5673    | Nucleotide hydrolase activity                                                                                     |
| CA1105 | 1.0 | 1.0 | 1.0 | IPF18760.4 | complemer unknown function, 3-prime end         |              | 18760 IPF18761   | UNCLASSI molecular_function unknown                                                                               |
| CA1106 | 0.9 | 1.1 | 0.9 | IPF11270   | complemer unknown function                      | orf19.1269   | 11270 IPF18760.4 | No significant S.c. match                                                                                         |
| CA1107 | 1.0 | 1.0 | 0.9 | IPF11271   | complemer by homology to S. cerevisiae: ATF     |              | 11271 IPF11270   | UNCLASSI RNA binding                                                                                              |
| CA1108 | 1.0 | 1.0 | 1.0 | IPF11273   | 5006572..5 unknown function                     | orf19.1269   | 11273 IPF11271   | ENERGY t transporter activity                                                                                     |
| CA1109 | 0.9 | 0.9 | 1.1 | MRPS9      | complemer ribosomal protein S9 s                | orf19.5230   | 11274 IPF11273   | No significant S.c. match                                                                                         |
| CA1110 | 0.8 | 0.8 | 0.8 | DIS3       | 5009476..53 -5 exoribonuclease                  | orf19.5229   | 10406 CaMRPS9    | PROTEIN t structural molecule activity                                                                            |
| CA1111 | 1.8 | 1.9 | 1.5 | RIB3       | complemer 3,4-dihydroxy-2-butanc                | orf19.1269   | 10407 CaDIS3     | CELL CYC RNA binding                                                                                              |
| CA1112 | 1.0 | 1.0 | 0.9 | IPF18758.4 | complemer unknown function, 5-pr                | orf19.2282   | 18758 CaRIB3     | Metabolism of vitamins cofactors and prosthetic groups                                                            |
| CA1113 | 0.9 | 0.9 | 0.9 | IPF9996    | 5018610..5 unknown function                     | orf19.2285   | 9996 IPF18758.4  | No significant S.c. match                                                                                         |
| CA1114 | 1.0 | 0.9 | 1.0 | IPF9995    | 5020524..5 unknown function                     | orf19.2286   | 9995 IPF9996     | C-compound and carbohydrate metabolism                                                                            |
| CA1115 | 0.9 | 0.9 | 1.0 | RPA12      | complemer DNA-directed RNA pol                  | orf19.2287   | 9993 IPF9995     | UNCLASSI molecular_function unknown                                                                               |
| CA1116 | 1.1 | 1.1 | 1.0 | CCT5       | 5022582..5 T-complex protein 1, e               | orf19.2288   | 9991 CaRPA12     | TRANSCR nucleotidyltransferase activity                                                                           |
| CA1117 | 1.0 | 0.9 | 0.9 | ARP3       | 5024605..5 actin related protein (b             | orf19.2289   | 9988 CaCCT5      | PROTEIN I chaperone activity                                                                                      |
| CA1118 | 0.7 | 0.5 | 0.9 | IPF9987    | 5026113..5 similar to phosphatidyli             | orf19.2290   | 9987 CaARP3      | CELLULAF structural molecule activity                                                                             |
| CA1119 | 1.0 | 0.9 | 1.1 | IPF7669.3  | 5028852..5 unknown function, 3-prime end        |              | 7669 IPF9987     | Lipid fatty-acid and isoprenoid metabolism ""CELL CYCLE AND DNA PROCESSING CELLULAR COMMUNICATION/SIGNAL TRANSDUC |
| CA1120 | 1.3 | 1.7 | 1.2 | IPF7666    | complemer unknown function                      | orf19.4056   | 7666 IPF7669.3   | UNCLASSIFIED PROTEINS                                                                                             |
| CA1121 | 1.0 | 1.1 | 1.1 | IPF6730    | complemer Unknown function                      | orf19.1604   | 6730 IPF7666     | UNCLASSIFIED PROTEINS                                                                                             |
| CA1122 | 1.1 | 1.1 | 1.1 | PMS1.3     | complemer DNA mismatch repair                   | orf19.1605   | 6724 IPF6730     | UNCLASSI molecular_function unknown                                                                               |
| CA1123 | 0.8 | 1.0 | 0.8 | IPF19723   | complemer similar to Saccharomy                 | orf19.6261   | 19723 CaPMS1.3   | CELL CYC DNA binding                                                                                              |
| CA1124 | 0.9 | 1.0 | 1.0 | UBP12      | complemer ubiquitin C-terminal hy               | orf19.6260   | 12859 IPF19723   | CELLULAF molecular_function unknown                                                                               |
| CA1125 | 1.0 | 1.0 | 1.0 | RRP43      | complemer rRNA processing prote                 | orf19.6259   | 12854 CaUBP12    | PROTEIN I peptidase activity                                                                                      |
| CA1126 | 1.1 | 1.1 | 1.0 | ECM18.3E   | 5081283..5 cell wall biogenesis, 3-             | orf19.3607   | 5203 CaRRP43     | TRANSCR RNA binding                                                                                               |
| CA1127 | 1.0 | 1.1 | 1.1 | MSH3       | complemer DNA mismatch repair t                 | orf19.3608   | 5201 CaECM18     | UNCLASSIFIED PROTEINS                                                                                             |

|        |     |     |     |            |                                     |              |                  |                                                                                                                 |
|--------|-----|-----|-----|------------|-------------------------------------|--------------|------------------|-----------------------------------------------------------------------------------------------------------------|
| CA1128 | 1.2 | 1.1 | 1.0 | IPF5198    | 5086718..5 unknown function         | orf19.3609   | 5198 CaMSH3      | CELL CYC DNA binding                                                                                            |
| CA1129 | 1.0 | 1.0 | 1.1 | IPF5197    | 5088566..5 unknown function         | orf19.3610   | 5197 IPF5198     | UNCLASSIFIED RNA binding                                                                                        |
| CA1130 | 1.0 | 0.9 | 1.0 | NAG1       | complemer Glucosamine-6-phosph      | orf19.9703   | 2719 IPF5197     | No significant S.c. match                                                                                       |
| CA1131 | 1.0 | 1.0 | 1.1 | NAG2       | 5093929..5 N-acetyl-glucosamine-    | orf19.9704   | 20073 CaNAG1     | No significant S.c. match                                                                                       |
| CA1132 | 1.0 | 1.0 | 1.0 | IPF2710.RI | complemer putative permease (by     | orf19.9705   | 2717 CaNAG2      | No significant S.c. match                                                                                       |
| CA1133 | 0.9 | 0.9 | 1.0 | IPF2710.RI | complemer putative permease (by     | orf19.9706   | 2710 IPF2710.re  | CELL RESCUE DEFENSE AND VIRULENCE ""TRANSPORT FACILITATION                                                      |
| CA1134 | 1.1 | 1.2 | 1.0 | IPF2702    | 5100522..5 unknown function         | orf19.2163   | 2702 IPF2710.re  | CELL RESCUE DEFENSE AND VIRULENCE ""TRANSPORT FACILITATION                                                      |
| CA1135 | 1.0 | 1.0 | 1.0 | IMP2       | 5107351..5 mitochondrial inner me   | orf19.1981   | 8699 IPF2702     | UNCLASSIFIED molecular_function unknown                                                                         |
| CA1136 | 1.0 | 1.0 | 0.9 | IFN2       | complemer glycerophosphoinosito     | orf19.1980   | 8698 CalIMP2     | CELL CYC peptidase activity                                                                                     |
| CA1137 | 1.0 | 1.0 | 1.0 | IFN1       | complemer glycerophosphoinosito     | orf19.1979   | 8694 CalFN2      | Lipid fatty-acid and isoprenoid metabolism ""SUBCELLULAR LOCALISATION TRANSPORT FACILITATION                    |
| CA1138 | 1.1 | 0.9 | 0.9 | IFN3       | complemer glycerophosphoinosito     | orf19.1978   | 8692 CalFN1      | Lipid fatty-acid and isoprenoid metabolism ""SUBCELLULAR LOCALISATION TRANSPORT FACILITATION                    |
| CA1139 | 1.0 | 1.1 | 1.0 | IPF9466    | complemer unknown function          | orf19.4066   | 9466 CalFN3      | Lipid fatty-acid and isoprenoid metabolism ""SUBCELLULAR LOCALISATION TRANSPORT FACILITATION                    |
| CA1140 | 0.9 | 1.0 | 1.0 | IPF17322.¿ | complemer unknown function, 3-pr    | orf19.4068   | 9462 IPF9466     | PROTEIN FATE [folding modification destination] ""CELLULAR TRANSPORT AND TRANSPORT MECHANISMS SUBCELLULAR LOCAL |
| CA1141 | 1.0 | 1.0 | 1.0 | IPF17322.¿ | complemer unknown function, 5-pr    | orf19.4069   | 9461 IPF17322.¿  | C-compound and carbohydrate metabolism TRANSCRIPTION CELL FATE SUBCELLULAR LOCALISATION                         |
| CA1142 | 0.8 | 0.5 | 1.0 | IPF9459    | complemer unknown function          | orf19.4070   | 9459 IPF17322.¿  | No significant S.c. match                                                                                       |
| CA1144 | 1.0 | 1.0 | 0.9 | SPS19      | 5135926..5 peroxisomal 2,4-dieno    | orf19.1116i  | 19650 IPF9459    | No significant S.c. match                                                                                       |
| CA1145 | 1.0 | 1.0 | 1.0 | GCS1       | 5137053..5 ADP-ribosylation factoi  | orf19.1116i  | 10382 CaSPS19    | ENERGY ¿ oxidoreductase activity                                                                                |
| CA1146 | 1.0 | 1.0 | 1.0 | CWH8       | complemer putative required prote   | orf19.3682   | 10381 CaGCS1     | CELL CYC protein binding                                                                                        |
| CA1147 | 0.9 | 1.0 | 1.0 | KAP95      | complemer karyopherin-beta prote    | orf19.1116i  | 10376 CaCWH8     | PROTEIN I hydrolase activity                                                                                    |
| CA1148 | 1.1 | 1.1 | 1.1 | CAN1       | 5149963..5 amino acid permease (    | orf19.97     | 10466 CaKAP95    | PROTEIN I protein binding                                                                                       |
| CA1149 | 1.1 | 1.0 | 1.1 | MET223     | complemer protein ser/thr phospho   | orf19.99     | 10464 CaCAN1     | Amino acid metabolism CELLULAR TRANSPORT AND TRANSPORT MECHANISMS SUBCELLULAR LOCALISATION TRANSPORT FA         |
| CA1150 | 0.9 | 1.0 | 1.0 | RIM9       | 5154830..5 regulator for sporulatio | orf19.101    | 10461 CaMET223   | Amino acid metabolism ""CELL RESCUE DEFENSE AND VIRULENCE ""                                                    |
| CA1151 | 1.1 | 1.0 | 1.0 | IPF10459   | complemer unknown function          | orf19.102    | 10459 CaRIM9     | CELL FATE                                                                                                       |
| CA1152 | 1.0 | 1.0 | 1.0 | IPF10457   | 5157592..5 nuclear fusion protein-  | orf19.103    | 10457 IPF10459   | CELL CYCLE AND DNA PROCESSING SUBCELLULAR LOCALISATION                                                          |
| CA1153 | 0.9 | 1.0 | 1.0 | IPF10455   | 5158194..5 unknown function         | orf19.104    | 10455 IPF10457   | CELL FATE SUBCELLULAR LOCALISATION                                                                              |
| CA1154 | 1.0 | 1.0 | 1.1 | MET221     | 5159447..5 protein ser/thr phospho  | orf19.105    | 10454 IPF10455   | CELL CYCLE AND DNA PROCESSING                                                                                   |
| CA1155 | 1.0 | 1.0 | 1.0 | JA2        | complemer ATP-dependent RNA f       | orf19.107    | 10452 CaMET221   | Amino acid hydrolase activity                                                                                   |
| CA1156 | 0.8 | 0.9 | 0.9 | RLR1       | 5165198..5 hypothetical regulatory  | orf19.4123   | 10133 CaJA2      | TRANSCR RNA binding, helicase activity                                                                          |
| CA1157 | 0.9 | 1.0 | 1.0 | PZF1       | complemer TFIIIA (transcription ini | orf19.4125   | 13278 CaRLR1     | TRANSCRIPTION PROTEIN SYNTHESIS                                                                                 |
| CA1158 | 1.1 | 1.2 | 1.0 | IPF13275   | 5172792..5 unknown function         | orf19.4127   | 13275 CaPZF1     | TRANSCR transcription regulator activity                                                                        |
| CA1159 | 1.0 | 1.0 | 1.1 | IPF13423   | complemer unknown function          | orf19.4128   | 13423 IPF13275   | SUBCELLL molecular_function unknown                                                                             |
| CA1160 | 1.1 | 1.2 | 1.0 | IPF10262   | 5182142..5 unknown function         | orf19.2726   | 10262 IPF13423   | UNCLASSIFIED PROTEINS                                                                                           |
| CA1161 | 0.9 | 1.0 | 1.0 | GRX3       | 5183340..5 glutaredoxin-like protei | orf19.2727   | 10259 IPF10262   | UNCLASSIFIED molecular_function unknown                                                                         |
| CA1162 | 1.0 | 1.0 | 1.0 | IPF10258   | complemer similar to Saccharomy     | orf19.2728   | 10258 CaGRX3     | PROTEIN I oxidoreductase activity                                                                               |
| CA1163 | 0.9 | 1.0 | 1.0 | IPF15357   | complemer unknown function          | orf19.2730   | 20076 IPF10258   | CELL CYC DNA binding                                                                                            |
| CA1164 | 1.0 | 1.0 | 1.0 | ARP8       | 5191111..5 actin-related protein (b | orf19.1086i  | 14479 IPF15357   | TRANSCR transcription regulator activity                                                                        |
| CA1165 | 0.6 | 0.7 | 0.5 | IPF19902   | 5196466..5 unknown function         | orf19.1086i  | 19902 CaARP8     | SUBCELLL molecular_function unknown                                                                             |
| CA1166 | 1.1 | 1.0 | 1.1 | IFO1       | 5204897..5 Unknown function         | orf19.1780   | 16648 IPF19902   | No significant S.c. match                                                                                       |
| CA1167 | 1.0 | 1.0 | 1.0 | IPF16646   | 5206503..5 unknown function         | orf19.1782   | 16646 CalFO1     | UNCLASSIFIED PROTEINS                                                                                           |
| CA1168 | 0.9 | 1.9 | 0.9 | IPF13017   | complemer unknown function          | orf19.1785   | 13017 IPF16646   | UNCLASSIFIED molecular_function unknown                                                                         |
| CA1169 | 0.9 | 1.1 | 0.9 | IPF16120.¿ | 5217924..5 unknown function, 3-pr   | orf19.2751   | 13270 IPF13017   | No significant S.c. match                                                                                       |
| CA1170 | 0.9 | 1.0 | 1.0 | IPF13268   | complemer unknown function          | orf19.2749   | 13268 IPF16120.¿ | TRANSPORT FACILITATION                                                                                          |
| CA1171 | 1.1 | 1.0 | 1.0 | IPF13264   | 5222162..5 zinc-finger transcriptio | orf19.2748   | 13264 IPF13268   | UNCLASSIFIED molecular_function unknown                                                                         |
| CA1172 | 1.1 | 0.9 | 0.7 | RGT1       | 5228722..5 Regulator of glucose-ir  | orf19.2747   | 14445 IPF13264   | Amino acid metabolism Nitrogen and sulphur metabolism TRANSCRIPTION SUBCELLULAR LOCALISATION                    |
| CA1173 | 1.0 | 1.0 | 1.0 | IPF14254   | complemer unknown function          | orf19.4768   | 14254 CaRGT1     | C-compour DNA binding                                                                                           |
| CA1174 | 0.9 | 1.0 | 0.9 | IPF14255   | complemer unknown function          | orf19.4767   | 14255 IPF14254   | No significant S.c. match                                                                                       |
| CA1175 | 0.9 | 0.8 | 0.9 | ARG81      | 5242145..5 transcription factor pos | orf19.4766   | 14033 IPF14255   | TRANSCRIPTION                                                                                                   |
| CA1176 | 1.0 | 1.2 | 1.0 | CHS5       | 5250988..5 Chitin biosynthesis pro  | orf19.807    | 5058 CaARG81     | Amino acid transcription regulator activity                                                                     |
| CA1177 | 1.0 | 1.0 | 1.0 | VMA7       | complemer vacuolar ATPase (by hor   | orf19.806    | 5061 CaCHS5      | C-compour molecular_function unknown                                                                            |
| CA1178 | 0.9 | 1.0 | 1.0 | IPF5062    | 5253582..5 unknown function         | orf19.805    | 5062 CaVMA7      | CELLULAF transporter activity                                                                                   |
| CA1179 | 0.9 | 1.0 | 1.0 | IPF5064    | complemer ADP/ATP carrier prote     | orf19.804    | 5064 IPF5062     | UNCLASSIFIED molecular_function unknown                                                                         |
| CA1180 | 1.1 | 1.0 | 1.4 | UGA12.3F   | complemer 4-aminobutyrate aminc     | orf19.803    | 19652 IPF5064    | Nucleotide transporter activity                                                                                 |
| CA1181 | 0.9 | 0.9 | 1.0 | UGA12.5F   | complemer 4-aminobutyrate aminc     | orf19.802    | 19651 CaUGA12.   | Amino acid metabolism Nitrogen and sulphur metabolism                                                           |
| CA1182 | 1.0 | 1.0 | 1.1 | IPF19724   | 5258815..5 similar to Saccharomy    | orf19.801    | 19724 CaUGA12.   | Amino acid metabolism Nitrogen and sulphur metabolism                                                           |
| CA1183 | 1.0 | 1.0 | 1.0 | IPF14805   | complemer acetyl-coenzyme A tra     | orf19.1126i  | 14805 IPF19724   | SUBCELLL DNA binding                                                                                            |
| CA1184 | 1.1 | 1.0 | 1.1 | IPF14802   | 5268529..5 unknown function         |              | 14802 IPF14805   | UNCLASSIFIED molecular_function unknown                                                                         |
| CA1185 | 1.1 | 1.1 | 1.0 | IPF19903   | complemer unknown function          | orf19.1126i  | 19903 IPF14802   | UNCLASSIFIED molecular_function unknown                                                                         |
| CA1186 | 0.8 | 0.8 | 0.9 | IPF6930    | 5272287..5 unknown function         | orf19.3785   | 6930 IPF19903    | No significant S.c. match                                                                                       |
| CA1187 | 1.1 | 1.1 | 1.0 | QR17       | complemer putative glycoprotease    | orf19.1126i  | 19904 IPF6930    | PROTEIN FATE [folding modification destination]                                                                 |
| CA1188 | 1.2 | 1.8 | 1.3 | RPL30.3    | complemer RNA binding, 3-prime end  | (by hor      | 6920 CaQR17      | PROTEIN I molecular_function unknown                                                                            |
| CA1189 | 1.0 | 1.5 | 1.2 | RPL24A     | 5276914..5 ribosomal protein L24    | (orf19.1126i | 18743 CaRPL30.¿  | PROTEIN I structural molecule activity                                                                          |
| CA1190 | 1.1 | 1.4 | 1.3 | CIP1       | 5280520..5 Cadmium induced prot     | orf19.7761   | 11929 CaRPL24A   | PROTEIN I RNA binding                                                                                           |
| CA1191 | 0.4 | 0.5 | 0.3 | CAN2       | 5283094..5 amino acid permease (    | orf19.111    | 11927 CaCIP1     | No significant S.c. match                                                                                       |
| CA1192 | 1.0 | 0.9 | 0.9 | IPF11926   | complemer unknown function          |              | 11926 CaCAN2     | Amino acid transporter activity                                                                                 |
| CA1193 | 0.9 | 1.0 | 0.9 | MSY1       | complemer tyrosyl-tRNA synthetas    | orf19.7756   | 11923 IPF11926   | No significant S.c. match                                                                                       |
| CA1194 | 1.0 | 1.0 | 1.0 | MET222     | complemer protein ser/thr phospho   | orf19.7752   | 17216 CaMSY1     | PROTEIN I ligase activity                                                                                       |
| CA1195 | 0.9 | 0.9 | 0.9 | KAR5       | complemer nuclear fusion protein-   | orf19.7750   | 17213 CaMET222   | Amino acid metabolism ""CELL RESCUE DEFENSE AND VIRULENCE ""                                                    |
| CA1196 | 1.0 | 0.8 | 0.9 | IPF10394   | complemer unknown function          |              | 10394 CaKAR5     | CELL FATI molecular_function unknown                                                                            |
| CA1197 | 0.9 | 0.9 | 1.0 | IFG1       | complemer probable d-amino acid     | orf19.1087i  | 10395 IPF10394   | No significant S.c. match                                                                                       |
| CA1198 | 1.0 | 1.0 | 1.1 | IPF10399   | 5299982..5 unknown function         | orf19.1087i  | 10399 CalFG1     | No significant S.c. match                                                                                       |
| CA1199 | 1.1 | 1.0 | 1.0 | IPF10404   | 5304747..5 unknown function         | orf19.1087i  | 10404 IPF10399   | UNCLASSIFIED structural molecule activity                                                                       |
| CA1200 | 1.0 | 0.9 | 1.0 | IPF10223   | complemer putative serine/threonii  | orf19.1233   | 10223 IPF10404   | UNCLASSIFIED molecular_function unknown                                                                         |



|        |     |     |     |            |                                                |             |       |            |                                                                                                                 |
|--------|-----|-----|-----|------------|------------------------------------------------|-------------|-------|------------|-----------------------------------------------------------------------------------------------------------------|
| CA1201 | 1.0 | 1.0 | 1.0 | IPF19906   | 5315004..5 unknown function                    | orf19.4869  | 19906 | IPF10223   | CELL CYC protein kinase activity                                                                                |
| CA1202 | 0.9 | 0.9 | 0.9 | DBP3       | 5316825..5 ATP-dependent RNA t                 | orf19.1233  | 10215 | IPF19906   | Nitrogen and sulphur metabolism TRANSCRIPTION SUBCELLULAR LOCALISATION                                          |
| CA1203 | 1.0 | 1.2 | 1.0 | IPF3937    | complemer Unknown function                     | orf19.8487  | 3937  | CaDBP3     | TRANSCR RNA binding,helicase activity                                                                           |
| CA1204 | 0.8 | 0.6 | 0.9 | IPF14524   | 5328163..5 unknown function                    | orf19.8486  | 14524 | IPF3937    | No significant S.c. match                                                                                       |
| CA1205 | 0.9 | 1.0 | 0.9 | SSK2       | complemer MAP kinase kinase kin                | orf19.1125  | 13431 | IPF14524   | REGULATI oxidoreductase activity                                                                                |
| CA1206 | 1.1 | 1.0 | 1.0 | HUB1       | 5339823..5 Ubiquitin-like modifier (by homolog |             | 15404 | CaSSK2     | CELL RES protein kinase activity,signal transducer activity                                                     |
| CA1207 | 0.9 | 1.0 | 1.1 | PPG1       | complemer Phosphoprotein phosph                | orf19.1125i | 18739 | CaHUB1     | UNCLASSIFIED PROTEINS                                                                                           |
| CA1208 | 1.0 | 1.0 | 1.0 | IPF17195   | 5342795..5 unknown function                    | orf19.1125i | 17195 | CaPPG1     | ENERGY protein phosphatase activity                                                                             |
| CA1209 | 0.9 | 0.7 | 1.1 | ARG8       | complemer acetylornithine aminotr              | orf19.1125  | 13486 | IPF17195   | TRANSCRIPTION SUBCELLULAR LOCALISATION                                                                          |
| CA1210 | 1.1 | 1.2 | 0.9 | IPF7030    | 5350146..5 unknown function                    | orf19.7778  | 7030  | CaARG8     | Amino acid transferase activity                                                                                 |
| CA1211 | 1.2 | 1.0 | 1.1 | IPF7031.3  | complemer unknown function, 3-prime end        |             | 7031  | IPF7030    | TRANSCR hydrolase activity                                                                                      |
| CA1212 | 1.1 | 1.1 | 1.1 | IPF7033    | complemer unknown function                     | orf19.7777  | 7033  | IPF7031.3  | UNCLASSI molecular_function unknown                                                                             |
| CA1213 | 1.0 | 1.1 | 1.0 | VPS15.5F   | 5353439..5 serine/threonine protei             | orf19.7776  | 7035  | IPF7033    | TRANSCR RNA binding                                                                                             |
| CA1214 | 1.0 | 1.0 | 1.1 | VPS15.53F  | 5355345..5 serine/threonine protei             | orf19.129   | 7038  | CaVPS15.:  | PROTEIN I protein kinase activity                                                                               |
| CA1215 | 0.9 | 0.7 | 1.0 | VPS15.3F   | 5356875..5 serine/threonine protei             | orf19.7773  | 7041  | CaVPS15.:  | PROTEIN FATE [folding modification destination] ""CELLULAR TRANSPORT AND TRANSPORT MECHANISMS SUBCELLULAR LOCAL |
| CA1216 | 1.0 | 0.9 | 1.0 | EBP1       | 5359651..5 NADPH dehydrogenas                  | orf19.7772  | 7044  | CaVPS15.:  | PROTEIN FATE [folding modification destination] ""CELLULAR TRANSPORT AND TRANSPORT MECHANISMS SUBCELLULAR LOCAL |
| CA1217 | 1.1 | 1.0 | 1.1 | IPF13909   | complemer Unknown function                     | orf19.7770  | 13909 | CaEBP1     | ENERGY                                                                                                          |
| CA1218 | 0.9 | 0.9 | 0.9 | CDC20      | complemer anaphase promoting ci                | orf19.7769  | 13908 | IPF13909   | No significant S.c. match                                                                                       |
| CA1219 | 1.0 | 1.1 | 1.1 | PRC2       | complemer carboxypeptidase y prc               | orf19.4135  | 14986 | CaCDC20    | CELL CYC enzyme regulator activity                                                                              |
| CA1220 | 1.0 | 1.1 | 1.0 | IPF14985   | 5372398..5 unknown function                    | orf19.4134  | 14985 | CaPRC2     | PROTEIN FATE [folding modification destination] ""SUBCELLULAR LOCALISATION                                      |
| CA1221 | 1.0 | 1.0 | 0.9 | IPF14872   | 5373766..5 unknown function                    | orf19.4133  | 14872 | IPF14985   | UNCLASSI molecular_function unknown                                                                             |
| CA1222 | 0.9 | 1.0 | 1.1 | IPF14871   | complemer unknown function                     | orf19.4132  | 14871 | IPF14872   | UNCLASSI molecular_function unknown                                                                             |
| CA1223 | 1.0 | 1.1 | 1.0 | IPF14870   | 5376671..5 unknown function                    | orf19.4131  | 14870 | IPF14871   | No significant S.c. match                                                                                       |
| CA1224 | 1.0 | 1.1 | 1.0 | IPF15662   | complemer unknown function                     | orf19.4156  | 15662 | IPF14870   | UNCLASSI molecular_function unknown                                                                             |
| CA1225 | 0.8 | 0.9 | 0.7 | SPS20      | complemer peroxisomal 2,4-dieno                | orf19.4157  | 15661 | IPF15662   | No significant S.c. match                                                                                       |
| CA1226 | 1.0 | 1.0 | 1.0 | IPF15660   | complemer putative mitochondrial               | orf19.4159  | 15660 | CaSPS20    | ENERGY SUBCELLULAR LOCALISATION                                                                                 |
| CA1227 | 0.9 | 1.0 | 1.0 | IPF16082   | 5392948..5 unknown function                    | orf19.4160  | 16082 | IPF15660   | CELLULAF transporter activity                                                                                   |
| CA1228 | 1.0 | 0.9 | 0.9 | IPF16081   | complemer unknown function                     | orf19.4161  | 16081 | IPF16082   | PROTEIN I molecular_function unknown                                                                            |
| CA1229 | 1.0 | 1.0 | 1.0 | MLH1       | 5395673..5 DNA mismatch repair                 | orf19.4162  | 15970 | IPF16081   | UNCLASSI molecular_function unknown                                                                             |
| CA1230 | 1.2 | 1.6 | 0.7 | SSA4       | 5401884..5 cahsp70 mRNA for he                 | orf19.4980  | 11819 | CaMLH1     | CELL CYC DNA binding                                                                                            |
| CA1231 | 1.0 | 1.1 | 0.9 | IPF11817   | complemer unknown function                     | orf19.4981  | 11817 | CaSSA4     | CELL RES chaperone activity                                                                                     |
| CA1232 | 1.0 | 1.0 | 0.9 | IPF11815   | complemer similar to Saccharomy                | orf19.4982  | 11815 | IPF11817   | TRANSPO molecular_function unknown                                                                              |
| CA1233 | 1.0 | 1.1 | 0.9 | IPF11814   | complemer unknown function                     | orf19.4983  | 11814 | IPF11815   | Lipid fatty-acid and isoprenoid metabolism                                                                      |
| CA1234 | 1.1 | 1.1 | 1.3 | IPF18732   | 5413276..5 histidine-rich glycoprot            | orf19.8330  | 18732 | IPF11814   | No significant S.c. match                                                                                       |
| CA1235 | 1.1 | 1.2 | 1.2 | IPF20079   | complemer unknown function                     | orf19.8332  | 20079 | IPF18732   | No significant S.c. match                                                                                       |
| CA1236 | 1.0 | 0.9 | 0.9 | YPT6       | 5418379..5 GTP-binding protein of              | orf19.8333  | 15785 | IPF20079   | UNCLASSI molecular_function unknown                                                                             |
| CA1237 | 1.6 | 1.7 | 1.2 | IPF15784   | complemer unknown function                     | orf19.8334  | 15784 | CaYPT6     | CELLULAF hydrolase activity                                                                                     |
| CA1238 | 1.7 | 1.4 | 1.5 | IPF15781   | 5420640..5 unknown function                    | orf19.8335  | 15781 | IPF15784   | No significant S.c. match                                                                                       |
| CA1239 | 1.1 | 1.0 | 0.9 | HSP60      | 5422161..5 Heat Shock Protein 60               | orf19.717   | 14025 | IPF15781   | No significant S.c. match                                                                                       |
| CA1240 | 1.0 | 1.0 | 1.0 | IPF14026   | 5424324..5 similar to Saccharomy               | orf19.8337  | 14026 | CaHSP60    | PROTEIN I chaperone activity                                                                                    |
| CA1241 | 1.2 | 1.1 | 1.2 | LIP8       | complemer Secretory lipase                     | orf19.8925  | 7914  | IPF14026   | TRANSCR transcription regulator activity                                                                        |
| CA1242 | 1.0 | 0.9 | 1.0 | IPF19908   | 5452014..5 unknown function                    | orf19.1344  | 19908 | CaLIP8     | Other virulence attributes                                                                                      |
| CA1243 | 0.9 | 0.9 | 1.1 | IPF7922    | complemer unknown function                     | orf19.8923  | 7922  | IPF19908   | No significant S.c. match                                                                                       |
| CA1244 | 1.0 | 1.1 | 1.1 | IPF12767   | 5465047..5 unknown function                    | orf19.2624  | 12767 | IPF7922    | Amino acid transcription regulator activity                                                                     |
| CA1245 | 1.3 | 1.6 | 1.1 | IMH3.EXO   | complemer IMP dehydrogenase, e                 | orf19.7689  | 3873  | IPF12767   | No significant S.c. match                                                                                       |
| CA1246 | 1.1 | 1.4 | 1.0 | IMH3.EXO   | complemer IMP dehydrogenase, e                 | orf19.19    | 3872  | CaIMH3.ex  | Nucleotide oxidoreductase activity                                                                              |
| CA1247 | 1.1 | 1.2 | 1.1 | IPF3870    | complemer similar to Saccharomy                | orf19.20    | 3870  | CaIMH3.ex  | Nucleotide metabolism Purine ribonucleotide metabolism                                                          |
| CA1248 | 1.0 | 1.1 | 1.1 | IPF3866    | complemer unknown function                     | orf19.7692  | 3866  | IPF3870    | CELL RES protein phosphatase activity                                                                           |
| CA1249 | 1.0 | 1.0 | 1.1 | SPE4       | 5482001..5 spermine synthase (by               | orf19.4960  | 9628  | IPF3866    | SUBCELLL molecular_function unknown                                                                             |
| CA1250 | 0.9 | 1.0 | 1.0 | IPF9626    | 5483727..5 unknown function                    | orf19.1242  | 9626  | CaSPE4     | Secondary transferase activity                                                                                  |
| CA1251 | 0.9 | 1.0 | 1.0 | IPF9624    | complemer similar to Saccharomy                | orf19.1242  | 9624  | IPF9626    | No significant S.c. match                                                                                       |
| CA1252 | 0.9 | 0.9 | 0.9 | RPN1       | 5489006..5 26S proteasome regul                | orf19.1242  | 9623  | IPF9624    | CONTROL molecular_function unknown                                                                              |
| CA1253 | 1.0 | 1.0 | 0.9 | FDH3.3F    | complemer formate dehydrogenas                 | orf19.1774  | 9034  | CaRPN1     | PROTEIN I peptidase activity,signal transducer activity                                                         |
| CA1255 | 1.0 | 0.9 | 0.9 | IPF9030    | 5497238..5 unknown function                    | orf19.1776  | 9030  | CaFDH3.3i  | ENERGY                                                                                                          |
| CA1256 | 1.2 | 1.0 | 1.0 | UBP15      | complemer ubiquitin-specific prote             | orf19.1777  | 9029  | IPF9030    | UNCLASSI nucleotidyltransferase activity                                                                        |
| CA1257 | 1.0 | 1.0 | 1.1 | IPF18725   | complemer unknown function                     | orf19.1067i | 18725 | CaUBP15    | PROTEIN I peptidase activity                                                                                    |
| CA1258 | 1.0 | 0.9 | 1.3 | RPN8       | 5510003..5 26S proteasome regul                | orf19.1067  | 18724 | IPF18725   | UNCLASSI molecular_function unknown                                                                             |
| CA1259 | 1.0 | 1.0 | 1.1 | IPF3174    | 5511244..5 Farnesyl transferase (t             | orf19.1067i | 3174  | CaRPN8     | PROTEIN I peptidase activity                                                                                    |
| CA1260 | 1.1 | 1.0 | 1.0 | IPF3170    | 5512965..5 unknown function                    | orf19.3166  | 3170  | IPF3174    | Lipid fatty-z transferase activity                                                                              |
| CA1261 | 0.9 | 1.0 | 1.0 | IPF9887.3f | 5519470..5 unknown function, 3-pr              | orf19.1240  | 9887  | IPF3170    | UNCLASSI molecular_function unknown                                                                             |
| CA1262 | 1.0 | 1.0 | 1.0 | MDR1       | 5527606..5 Mac1p interacting prot              | orf19.1244  | 9881  | IPF9887.3c | UNCLASSI molecular_function unknown                                                                             |
| CA1263 | 1.0 | 1.3 | 1.1 | IPF9880    | complemer unknown function                     | orf19.1246  | 9880  | CaMDR1     | TRANSCR enzyme regulator activity                                                                               |
| CA1264 | 0.8 | 0.7 | 0.8 | STH1       | complemer helicase related protei              | orf19.239   | 10096 | IPF9880    | No significant S.c. match                                                                                       |
| CA1265 | 1.0 | 0.8 | 1.2 | IPF10510   | 5542480..5 unknown function                    | orf19.240   | 10510 | CaSTH1     | CELL CYC DNA binding,helicase activity                                                                          |
| CA1266 | 1.0 | 1.0 | 1.0 | SAP8       | complemer aspartic protease                    | orf19.242   | 10508 | IPF10510   | UNCLASSI molecular_function unknown                                                                             |
| CA1267 | 0.9 | 1.0 | 1.0 | YSY6       | 5546802..5 protein involved in the secretory p |             | 10503 | CaSAP8     | PROTEIN FATE [folding modification destination] ""SUBCELLULAR LOCALISATION Other virulence attributes           |
| CA1268 | 1.0 | 0.9 | 1.0 | IPF14693   | complemer unknown function                     | orf19.3159  | 14693 | CaYSY6     | PROTEIN FATE [folding modification destination] ""CELLULAR TRANSPORT AND TRANSPORT MECHANISMS                   |
| CA1269 | 1.0 | 0.9 | 1.0 | IPF19726   | 5552779..5 unknown function                    | orf19.1066  | 19726 | IPF14693   | UNCLASSI molecular_function unknown                                                                             |
| CA1270 | 1.0 | 1.1 | 1.2 | IPF13504   | 5558228..5 unknown function                    | orf19.1066i | 13504 | IPF19726   | UNCLASSI molecular_function unknown                                                                             |
| CA1271 | 1.0 | 0.9 | 0.9 | HIT1       | 5569225..5 required for growth at              | orf19.2723  | 6402  | IPF13504   | No significant S.c. match                                                                                       |
| CA1272 | 1.0 | 1.0 | 1.1 | CGR1       | complemer Cell growth protein (by              | orf19.2722  | 18718 | CaHIT1     | CELL RES molecular_function unknown                                                                             |
| CA1273 | 1.0 | 1.0 | 1.0 | CCT4       | 5572601..5 Component of chaperc                | orf19.2720  | 6406  | CaCGR1     | UNCLASSI molecular_function unknown                                                                             |

|        |     |     |     |            |                                              |             |                  |                                                                                                                                             |
|--------|-----|-----|-----|------------|----------------------------------------------|-------------|------------------|---------------------------------------------------------------------------------------------------------------------------------------------|
| CA1274 | 0.9 | 0.9 | 0.8 | SAS10      | complemer Involved in silencing (b           | orf19.2717  | 6410 CaCCT4      | PROTEIN I chaperone activity                                                                                                                |
| CA1275 | 1.0 | 1.1 | 1.0 | RPC53      | 5576302..5 DNA-directed RNA pol              | orf19.2715  | 19910 CaSAS10    | TRANSCR RNA binding                                                                                                                         |
| CA1277 | 1.0 | 1.0 | 1.0 | IPF10837   | 5581353..5 unknown function                  | orf19.3630  | 10837 CaRPC53    | TRANSCR nucleotidyltransferase activity                                                                                                     |
| CA1278 | 0.9 | 0.9 | 1.0 | IPF10835   | 5584841..5 unknown function                  | orf19.3629  | 10835 IPF10837   | TRANSCR transferase activity                                                                                                                |
| CA1279 | 1.0 | 1.1 | 1.0 | RSP5       | 5588206..5 ubiquitin-protein ligase          | orf19.3628  | 10833 IPF10835   | UNCLASSI molecular_function unknown                                                                                                         |
| CA1280 | 0.9 | 1.0 | 0.9 | IPF10828   | 5591405..5 unknown function                  | orf19.3627  | 10828 CaRSP5     | PROTEIN I ligase activity                                                                                                                   |
| CA1281 | 1.1 | 0.8 | 0.9 | IPF10171.f | complemer unknown function, exo              | orf19.645   | 10174 IPF10828   | UNCLASSIFIED PROTEINS                                                                                                                       |
| CA1282 | 0.9 | 0.9 | 1.0 | IPF10171.f | complemer unknown function, exon 2           |             | 10173 IPF10171.ε | C-compound and carbohydrate metabolism CELLULAR TRANSPORT AND TRANSPORT MECHANISMS SUBCELLULAR LOCALISATIO                                  |
| CA1283 | 1.1 | 1.1 | 1.1 | IPF10171.f | complemer unknown function, exo              | orf19.644   | 10171 IPF10171.ε | C-compound and carbohydrate metabolism CONTROL OF CELLULAR ORGANIZATION TRANSPORT FACILITATION                                              |
| CA1284 | 1.0 | 0.9 | 1.0 | IPF10168.ε | 5603150..5 unknown function, 3-pr            | orf19.8257  | 10168 IPF10171.ε | C-compound and carbohydrate metabolism CELLULAR TRANSPORT AND TRANSPORT MECHANISMS REGULATION OF/INTERACTIO                                 |
| CA1285 | 1.0 | 1.0 | 1.6 | SKP1       | 5610067..5 kinetochore protein coi           | orf19.1190f | 5549 IPF10168.ε  | CELL CYC molecular_function unknown                                                                                                         |
| CA1286 | 1.0 | 1.0 | 1.0 | IPF5546    | 5611387..5 unknown function                  | orf19.1190f | 5546 CaSKP1      | Amino acid protein binding                                                                                                                  |
| CA1287 | 1.0 | 1.0 | 1.1 | IPF5545    | complemer unknown function                   | orf19.4430  | 5545 IPF5546     | CELL CYCLE AND DNA PROCESSING TRANSCRIPTION SUBCELLULAR LOCALISATION                                                                        |
| CA1288 | 0.9 | 1.2 | 1.0 | KSP1       | 5616957..5 SERINE/THREONINE                  | orf19.4432  | 5540 IPF5545     | PROTEIN I molecular_function unknown                                                                                                        |
| CA1289 | 0.7 | 1.0 | 0.7 | ZUO1       | 5623854..5 Zuo1in, a putative Z-D            | orf19.1022f | 16213 CaKSP1     | SUBCELLL protein kinase activity                                                                                                            |
| CA1290 | 1.1 | 0.9 | 1.0 | IPF16212   | complemer unknown function                   | orf19.2710  | 16212 CaZUO1     | SUBCELLL chaperone activity                                                                                                                 |
| CA1291 | 1.0 | 1.0 | 1.0 | IPF16752   | complemer unknown function                   | orf19.2711  | 16752 IPF16212   | C-compour enzyme regulator activity                                                                                                         |
| CA1292 | 0.9 | 0.9 | 0.9 | SRB2.3     | 5629009..5 DNA-directed RNA polymerase II    |             | 6419 IPF16752    | TRANSCR transcription regulator activity                                                                                                    |
| CA1293 | 0.9 | 1.0 | 1.0 | HCA4       | 5630031..5 Can suppress the U14              | orf19.2712  | 6418 CaSRB2.3    | TRANSCR transcription regulator activity                                                                                                    |
| CA1294 | 1.0 | 1.0 | 0.9 | MSH5.3F    | complemer Meiosis-specific protei            | orf19.1022f | 6415 CaHCA4      | TRANSCR RNA binding,helicase activity                                                                                                       |
| CA1296 | 1.0 | 1.0 | 1.0 | IPF18712   | 5635451..5 unknown function                  |             | 18712 CaMSH5.3   | CELL CYC molecular_function unknown                                                                                                         |
| CA1297 | 1.1 | 1.1 | 1.0 | ACF2       | 5637459..5 endo-1,3-beta-glucana             | orf19.3417  | 14734 IPF18712   | UNCLASSIFIED PROTEINS                                                                                                                       |
| CA1298 | 1.4 | 2.4 | 1.2 | RPL32      | 5640699..5 ribosomal protein L32             |             | 12449 CaACF2     | PROTEIN I hydrolase activity                                                                                                                |
| CA1299 | 1.0 | 1.0 | 1.0 | PTK2       | complemer serine /threonine prote            | orf19.3415  | 12448 CaRPL32    | PROTEIN I structural molecule activity                                                                                                      |
| CA1300 | 0.5 | 0.3 | 1.0 | SLY41      | 5650076..5 vesicular transport (by           | orf19.4199  | 12346 CaPTK2     | CELLULAF protein kinase activity                                                                                                            |
| CA1301 | 0.9 | 0.9 | 1.0 | YHM2       | complemer mtDNA stabilizing prot             | orf19.4197  | 12348 CaSLY41    | CELLULAF molecular_function unknown                                                                                                         |
| CA1302 | 1.1 | 1.0 | 1.1 | FCA1.3     | 5654565..5 cytosine deaminase, 3-prime end   |             | 13513 CaYHM2     | CELL CYC transporter activity                                                                                                               |
| CA1303 | 1.1 | 1.0 | 1.0 | TFB4       | complemer component of RNA pol               | orf19.4194  | 13511 CaFCA1.3   | Nucleotide hydrolase activity                                                                                                               |
| CA1304 | 2.1 | 2.2 | 1.5 | RPS13.3    | complemer ribosomal protein, 3-prime end (by |             | 13509 CaTFB4     | CELL CYC transcription regulator activity                                                                                                   |
| CA1305 | 1.0 | 1.0 | 1.1 | IPF13508   | complemer unknown function                   | orf19.4193  | 13508 CaRPS13.ε  | PROTEIN I structural molecule activity                                                                                                      |
| CA1306 | 1.1 | 1.1 | 1.0 | CDC14.3    | 5659135..5 protein phosphatase, 3            | orf19.4192  | 13507 IPF13508   | UNCLASSI molecular_function unknown                                                                                                         |
| CA1307 | 0.9 | 0.8 | 1.0 | IPF13506.ε | complemer unknown function, 3-prime end      |             | 13506 CaCDC14.ε  | CELL CYC protein phosphatase activity                                                                                                       |
| CA1308 | 1.0 | 1.0 | 1.1 | IPF8642    | 5663134..5 unknown function                  | orf19.1145f | 8642 IPF13506.ε  | No significant S.c. match                                                                                                                   |
| CA1309 | 1.0 | 1.1 | 1.1 | IPF8627    | 5671739..5 unknown function                  | orf19.1145f | 8627 IPF8642     | UNCLASSIFIED PROTEINS                                                                                                                       |
| CA1310 | 1.0 | 1.0 | 0.9 | IPF14232   | 5675956..5 unknown function                  | orf19.1111f | 14232 IPF8627    | TRANSCRIPTION SUBCELLULAR LOCALISATION                                                                                                      |
| CA1311 | 1.0 | 1.0 | 1.0 | IPF14233   | 5678043..5 Putative transthyretin ε          | orf19.3633  | 14233 IPF14232   | No significant S.c. match                                                                                                                   |
| CA1312 | 0.9 | 0.9 | 1.0 | IPF14241   | complemer unknown function                   | orf19.1111f | 14241 IPF14233   | UNCLASSIFIED PROTEINS                                                                                                                       |
| CA1313 | 1.0 | 0.9 | 0.9 | IPF14126   | 5686766..5 unknown function                  | orf19.3638  | 14126 IPF14241   | No significant S.c. match                                                                                                                   |
| CA1314 | 0.9 | 0.9 | 1.0 | MAG1       | complemer 3-methyladenine DNA                | orf19.3639  | 14127 IPF14126   | No significant S.c. match                                                                                                                   |
| CA1315 | 1.1 | 1.0 | 1.0 | URA2.5EO   | complemer multifunctional pyrimidi           | orf19.9896  | 10801 CaMAG1     | CELL CYC DNA binding                                                                                                                        |
| CA1316 | 1.0 | 1.0 | 1.0 | IPF14587.ε | 5701736..5 unknown function, 3-prime end     |             | 14587 CaURA2.5   | Nucleotide transferase activity                                                                                                             |
| CA1318 | 1.0 | 1.0 | 0.9 | IPF3147    | complemer Nuclear valosin-containi           | orf19.4219  | 3147 IPF14587.ε  | No significant S.c. match                                                                                                                   |
| CA1319 | 0.8 | 0.7 | 0.8 | IPF3144    | complemer unknown function                   | orf19.4220  | 3144 IPF3147     | CLASSIFIC helicase activity                                                                                                                 |
| CA1320 | 1.0 | 0.9 | 1.0 | IPF3143    | complemer similar to Saccharomy              | orf19.4221  | 3143 IPF3144     | UNCLASSI molecular_function unknown                                                                                                         |
| CA1321 | 0.9 | 0.9 | 1.0 | IPF3141    | 5715614..5 similar to Saccharomy             | orf19.4222  | 3141 IPF3143     | CELL CYC DNA binding                                                                                                                        |
| CA1322 | 0.6 | 0.5 | 0.8 | GCD11      | complemer Translation initiation fa          | orf19.4223  | 3140 IPF3141     | PROTEIN I enzyme regulator activity                                                                                                         |
| CA1323 | 0.7 | 0.5 | 1.0 | IPF6675    | complemer unknown function                   | orf19.1309  | 6675 CaGCD11     | TRANSCR translation regulator activity                                                                                                      |
| CA1324 | 0.7 | 0.5 | 1.0 | IPF6676    | 5723687..5 polytopic membrane pr             | orf19.1308  | 6676 IPF6675     | No significant S.c. match                                                                                                                   |
| CA1325 | 0.9 | 0.8 | 1.0 | IPF6678    | complemer unknown function                   | orf19.1307  | 6678 IPF6676     | CELL RES molecular_function unknown                                                                                                         |
| CA1326 | 1.0 | 1.0 | 1.0 | IPF6679    | complemer unknown function                   | orf19.1306  | 6679 IPF6678     | UNCLASSIFIED PROTEINS                                                                                                                       |
| CA1327 | 0.8 | 0.8 | 0.9 | IPF6680    | complemer unknown function                   | orf19.1305  | 6680 IPF6679     | No significant S.c. match                                                                                                                   |
| CA1328 | 0.9 | 0.7 | 0.9 | RRP4       | 5730636..5 3→5 exoribonuclease               | orf19.1304  | 6682 IPF6680     | UNCLASSI transferase activity                                                                                                               |
| CA1329 | 0.9 | 0.8 | 0.9 | MRF2       | complemer peptide chain release f            | orf19.1303  | 19626 CaRRP4     | No significant S.c. match                                                                                                                   |
| CA1330 | 1.0 | 0.9 | 0.9 | IPF11713   | 5738047..5 unknown function                  | orf19.8744  | 11713 CaMRF2     | PROTEIN I translation regulator activity                                                                                                    |
| CA1331 | 0.9 | 1.0 | 1.0 | IPF11714   | complemer unknown function                   |             | 11714 IPF11713   | Lipid fatty-acid and isoprenoid metabolism *****Metabolism of vitamins cofactors and prosthetic groups *****PROTEIN FATE [folding modifical |
| CA1332 | 0.9 | 0.9 | 0.9 | IPF11716   | 5740711..5 unknown function                  | orf19.1150  | 11716 IPF11714   | No significant S.c. match                                                                                                                   |
| CA1333 | 0.9 | 0.5 | 1.4 | MRF1       | complemer mitochondrial respirato            | orf19.8742  | 11717 IPF11716   | Nitrogen and sulphur metabolism TRANSCRIPTION SUBCELLULAR LOCALISATION                                                                      |
| CA1334 | 1.1 | 0.9 | 1.0 | IPF19912   | complemer unknown function                   | orf19.8740  | 19912 CaMRF1     | TRANSCRIPTION SUBCELLULAR LOCALISATION                                                                                                      |
| CA1335 | 1.0 | 0.9 | 1.0 | TRA1       | 5749821..5 phosphatidylinositol kir          | orf19.3451  | 5342 IPF19912    | CELL RESCUE DEFENSE AND VIRULENCE "" CELL FATE                                                                                              |
| CA1336 | 1.0 | 0.9 | 0.9 | IPF5334.E  | complemer unknown function, exon 2           |             | 5335 CaTRA1      | TRANSCR transferase activity                                                                                                                |
| CA1338 | 1.0 | 1.1 | 1.0 | IPF5333    | 5758841..5 unknown function                  | orf19.1095f | 5333 IPF5334.es  | UNCLASSI molecular_function unknown                                                                                                         |
| CA1339 | 1.0 | 1.1 | 1.0 | IPF5330    | 5762965..5 unknown function                  | orf19.1095f | 5330 IPF5333     | UNCLASSI molecular_function unknown                                                                                                         |
| CA1340 | 1.1 | 1.0 | 1.1 | VPS4       | 5770457..5 vacuolar sorting protei           | orf19.4339  | 11343 IPF5330    | No significant S.c. match                                                                                                                   |
| CA1341 | 0.9 | 0.9 | 1.0 | IPF11344   | complemer unknown function                   | orf19.4340  | 11344 CaVPS4     | PROTEIN I hydrolase activity                                                                                                                |
| CA1342 | 1.1 | 1.1 | 0.9 | IPF11347   | complemer unknown function                   |             | 11347 IPF11344   | CELLULAR TRANSPORT AND TRANSPORT MECHANISMS REGULATION OF/INTERACTION WITH CELLULAR ENVIRONMENT                                             |
| CA1343 | 1.0 | 1.0 | 1.0 | IPF14624   | 5779872..5 unknown function                  |             | 14624 IPF11347   | No significant S.c. match                                                                                                                   |
| CA1344 | 0.9 | 0.9 | 0.9 | IPF14623   | 5780307..5 unknown function                  | orf19.4342  | 14623 IPF14624   | No significant S.c. match                                                                                                                   |
| CA1345 | 1.1 | 1.2 | 1.0 | IPF6003    | 5788850..5 similar to Saccharomy             | orf19.1490  | 6003 IPF14623    | CELLULAF transcription regulator activity                                                                                                   |
| CA1346 | 1.0 | 1.0 | 1.0 | KRE2.3F    | complemer secretory pathway protein, 3-prime |             | 18700 IPF6003    | CELL FATI signal transducer activity                                                                                                        |
| CA1349 | 0.9 | 1.1 | 1.0 | PRP12      | 5804530..5 involved in early matur           | orf19.4351  | 12922 CaKRE2.3f  | No significant S.c. match                                                                                                                   |
| CA1350 | 1.0 | 1.1 | 1.1 | MCM2       | complemer replication licensing fac          | orf19.4354  | 15306 CaPRP12    | TRANSCR hydrolase activity                                                                                                                  |
| CA1351 | 1.0 | 1.0 | 1.1 | PCL2       | complemer G1/S specific cyclin               | orf19.403   | 8834 CaMCM2      | CELL CYC DNA binding                                                                                                                        |

|        |      |     |     |            |                                         |             |                  |                                                                                                            |
|--------|------|-----|-----|------------|-----------------------------------------|-------------|------------------|------------------------------------------------------------------------------------------------------------|
| CA1352 | 1.0  | 1.0 | 1.0 | VCX1       | complemer Ca2+-transport by horr        | orf19.405   | 16576 CaPCL2     | CELL CYC protein kinase activity,enzyme regulator activity                                                 |
| CA1353 | 0.9  | 0.8 | 1.4 | ERG1       | complemer squalene epoxidase            | orf19.406   | 19729 CaVCX1     | CELLULAF transporter activity                                                                              |
| CA1354 | 0.9  | 1.0 | 0.9 | GCD6       | complemer translation initiation factor | orf19.407   | 10142 CaERG1     | Lipid fatty-: oxidoreductase activity                                                                      |
| CA1355 | 1.2  | 1.1 | 1.0 | IPF10138.1 | complemer unknown function, 3-pr        | orf19.408   | 10140 CaGCD6     | PROTEIN t translation regulator activity                                                                   |
| CA1356 | 0.9  | 0.9 | 1.0 | IPF10138.2 | complemer unknown function, 5-pr        | orf19.409   | 10138 IPF10138.1 | No significant S.c. match                                                                                  |
| CA1357 | 1.0  | 1.1 | 1.1 | ARH1       | 5829588..5 adrenodoxin reductase        | orf19.410   | 10134 IPF10138.2 | UNCLASSImolecular_function unknown                                                                         |
| CA1358 | 1.0  | 1.0 | 1.0 | NIF3       | complemer Ngg1p-interacting fact        | orf19.4406  | 11837 CaARH1     | Lipid fatty-: transporter activity                                                                         |
| CA1359 | 1.0  | 0.9 | 1.0 | IPF11842   | complemer unknown function              | orf19.4405  | 11842 CaNIF3     | TRANSCR molecular_function unknown                                                                         |
| CA1360 | 1.1  | 1.0 | 1.0 | IPF14598   | 5844203..5 unknown function             | orf19.4404  | 14598 IPF11842   | CELL CYCLE AND DNA PROCESSING                                                                              |
| CA1361 | 1.0  | 1.0 | 1.0 | PEP5       | 5846748..5 vacuolar biogenesis pr       | orf19.4403  | 11853 IPF14598   | No significant S.c. match                                                                                  |
| CA1362 | 0.9  | 0.9 | 1.0 | PEX3       | complemer PEROXISOMAL MEMI              | orf19.4426  | 5552 CaPEP5      | PROTEIN Imolecular_function unknown                                                                        |
| CA1363 | 1.0  | 0.9 | 1.0 | IPF5556    | 5857554..5 acid phosphatase (by t       | orf19.4424  | 5556 CaPEX3      | CELLULAFmolecular_function unknown                                                                         |
| CA1364 | 1.1  | 1.0 | 0.9 | IPF5561    | 5859512..5 unknown function             | orf19.4423  | 5561 IPF5556     | No significant S.c. match                                                                                  |
| CA1365 | 0.9  | 0.9 | 1.1 | IPF11849   | 5867837..5 unknown function             | orf19.4459  | 11849 IPF5561    | UNCLASSIFIED PROTEINS                                                                                      |
| CA1366 | 1.0  | 0.9 | 1.1 | IPF11847   | 5871971..5 unknown function             | orf19.4457  | 11847 IPF11849   | UNCLASSIFIED PROTEINS                                                                                      |
| CA1367 | 1.0  | 1.0 | 1.1 | IPF16755   | 5882980..5 unknown function             | orf19.4966  | 16755 IPF11847   | PROTEIN I protein binding                                                                                  |
| CA1368 | 0.9  | 0.9 | 0.9 | IPF15969   | complemer unknown function              | orf19.4965  | 15969 IPF16755   | C-compour transporter activity                                                                             |
| CA1369 | 1.0  | 1.0 | 1.0 | IPF15968   | complemer unknown function              | orf19.4964  | 15968 IPF15969   | No significant S.c. match                                                                                  |
| CA1370 | 1.0  | 1.0 | 0.9 | TC11       | complemer protein phosphatase T         | orf19.4963  | 15966 IPF15968   | UNCLASSImolecular_function unknown                                                                         |
| CA1371 | 0.9  | 0.9 | 0.9 | IPF19731   | 5890450..5 unknown function             | orf19.4962  | 19731 CaTC11     | UNCLASSImolecular_function unknown                                                                         |
| CA1372 | 0.8  | 0.9 | 0.6 | IPF15844   | complemer similar to Saccharomy         | orf19.4961  | 15844 IPF19731   | UNCLASSImolecular_function unknown                                                                         |
| CA1373 | 1.2  | 1.6 | 1.2 | AGP1       | complemer asparagine and glutar         | orf19.8784  | 7152 IPF15844    | TRANSCR transcription regulator activity                                                                   |
| CA1374 | 1.1  | 1.0 | 1.1 | MIP1       | complemer Mitochondrial intermed        | orf19.1195  | 7154 CaAGP1      | Amino acid transporter activity                                                                            |
| CA1375 | 1.0  | 1.0 | 1.0 | IPF7158    | 5903699..5 putative serine/threoni      | orf19.8787  | 7158 CaMIP1      | PROTEIN I peptidase activity                                                                               |
| CA1376 | 0.9  | 0.9 | 1.0 | IPF7159    | complemer unknown function              | orf19.8789  | 7159 IPF7158     | CLASSIFIC protein kinase activity                                                                          |
| CA1377 | 1.1  | 1.0 | 1.0 | IPF18690   | complemer unknown function              | orf19.461   | 18690 IPF7159    | UNCLASSImolecular_function unknown                                                                         |
| CA1378 | 1.0  | 1.0 | 1.0 | ERK2       | 5912192..5 mitogen-activated prot       | orf19.460   | 2568 IPF18690    | No significant S.c. match                                                                                  |
| CA1380 | 1.1  | 1.0 | 1.0 | BCS1       | complemer mitochondrial protein c       | orf19.458   | 2574 CaERK2      | CELL CYCLE AND DNA PROCESSING REGULATION OF/INTERACTION WITH CELLULAR ENVIRONMENT CELL FATE SUBCELLUL      |
| CA1381 | 0.9  | 0.9 | 0.9 | IPF8420    | complemer unknown function              | orf19.929   | 8420 CaBCS1      | PROTEIN I hydrolase activity                                                                               |
| CA1382 | 0.9  | 0.8 | 0.9 | IPF8421    | complemer unknown function              | orf19.928   | 8421 IPF8420     | CELL RESCUE DEFENSE AND VIRULENCE ""TRANSPORT FACILITATION                                                 |
| CA1383 | 1.0  | 0.9 | 1.0 | IPF8422    | 5926369..5 unknown function             | orf19.927   | 8422 IPF8421     | No significant S.c. match                                                                                  |
| CA1384 | 1.0  | 0.9 | 1.0 | IPF8423    | complemer similar to Saccharomy         | orf19.926   | 8423 IPF8422     | UNCLASSImolecular_function unknown                                                                         |
| CA1385 | 0.9  | 0.8 | 1.0 | IPF8424    | complemer unknown function              | orf19.925   | 8424 IPF8423     | Nucleotide hydrolase activity,DNA binding                                                                  |
| CA1386 | 1.0  | 1.0 | 1.0 | THR1       | complemer homoserine kinase             | orf19.923   | 8426 IPF8424     | TRANSCRIPTION                                                                                              |
| CA1387 | 1.0  | 1.0 | 1.0 | ERG16      | complemer cytochrome P450 lano          | orf19.922   | 8427 CaTHR1      | Amino acid transferase activity                                                                            |
| CA1388 | 1.2  | 1.0 | 1.1 | IPF16514   | complemer unknown function              | orf19.921   | 16514 CaERG16    | Lipid fatty-: oxidoreductase activity                                                                      |
| CA1389 | 1.0  | 1.0 | 1.0 | PLP2       | 5939493..5 Might regulate Ste4p ir      | orf19.9338  | 17476 IPF16514   | No significant S.c. match                                                                                  |
| CA1390 | 1.0  | 1.0 | 0.9 | IPF17474   | 5940747..5 unknown function             | orf19.1768  | 17474 CaPLP2     | CELL FATI enzyme regulator activity                                                                        |
| CA1391 | 0.9  | 0.9 | 1.0 | IPF6151    | 5942778..5 unknown function             |             | 6151 IPF17474    | CELL CYCLE AND DNA PROCESSING ""PROTEIN FATE [folding modification destination] ""SUBCELLULAR LOCALISATION |
| CA1392 | 0.9  | 0.9 | 0.9 | IPF6149    | 5944903..5 similar to Saccharomy        | orf19.1767  | 6149 IPF6151     | CELL CYCLE AND DNA PROCESSING SUBCELLULAR LOCALISATION                                                     |
| CA1393 | 1.0  | 1.0 | 1.0 | IF03       | 5948144..5 Similar to Streptomyce       | orf19.1766  | 6146 IPF6149     | PROTEIN I peptidase activity                                                                               |
| CA1394 | 1.0  | 1.1 | 1.0 | IF02       | 5952440..5 unknown function             | orf19.9334  | 19560 CaIF03     | CELL FATE                                                                                                  |
| CA1395 | 0.9  | 1.0 | 1.0 | IPF17558   | 5956966..5 unknown function             | orf19.9332  | 17558 CaFO2      | UNCLASSIFIED PROTEINS                                                                                      |
| CA1396 | 1.0  | 0.9 | 1.0 | IPF8075    | 5961207..5 unknown function             | orf19.3701  | 8075 IPF17558    | SUBCELLULAR LOCALISATION                                                                                   |
| CA1397 | 1.2  | 1.2 | 1.0 | TOM72      | 5963697..5 mitochondrial import re      | orf19.3700  | 8073 IPF8075     | UNCLASSImolecular_function unknown                                                                         |
| CA1398 | 1.0  | 0.9 | 1.0 | IPF19913   | 5965945..5 unknown function             | orf19.3699  | 19913 CaTOM72    | PROTEIN I transporter activity                                                                             |
| CA1399 | 1.0  | 0.9 | 1.1 | IPF8069    | complemer unknown function              | orf19.3698  | 8069 IPF19913    | CELLULAF hydrolase activity                                                                                |
| CA1400 | 1.1  | 1.0 | 1.0 | IPF8067    | 5968669..5 unknown function             | orf19.3697  | 8067 IPF8069     | UNCLASSImolecular_function unknown                                                                         |
| CA1401 | 1.1  | 1.1 | 1.0 | TOM22      | 5971836..5 mitochondrial outer me       | orf19.3696  | 8066 IPF8067     | UNCLASSImolecular_function unknown                                                                         |
| CA1402 | 11.3 | 5.6 | 5.4 | ECE1       | 5996321..5 Cell Elongation Protein      | orf19.3374  | 14152 CaTOM22    | PROTEIN I transporter activity                                                                             |
| CA1403 | 0.9  | 0.8 | 0.9 | IPF14155   | 5997783..5 similar to Saccharomy        | orf19.3373  | 14155 CaECE1     | Hypa-specific No significant S.c. match                                                                    |
| CA1404 | 1.0  | 0.9 | 0.9 | IPF19554.1 | 5999907..6 unknown function, 5-pr       | orf19.3372  | 19554 IPF14155   | CELL CYC RNA binding                                                                                       |
| CA1405 | 0.9  | 1.0 | 0.9 | IPF19554.2 | 6000571..6 unknown function, 3-pr       | orf19.3371  | 15627 IPF19554.1 | UNCLASSIpeptidase activity                                                                                 |
| CA1406 | 0.9  | 0.9 | 1.0 | DOT4       | 6002515..6 derepression of telome       | orf19.3370  | 15624 IPF19554.2 | No significant S.c. match                                                                                  |
| CA1407 | 0.9  | 1.0 | 1.0 | UAPC       | 6017274..6 purine permease (by h        | orf19.2882  | 10516 CaDOT4     | TRANSCR peptidase activity                                                                                 |
| CA1408 | 1.0  | 1.0 | 1.0 | IPF10513   | 6020500..6 unknown function             | orf19.2883  | 10513 CaUAPC     | No significant S.c. match                                                                                  |
| CA1409 | 1.0  | 1.0 | 1.0 | SPT16      | complemer general chromatin fact        | orf19.2884  | 10512 IPF10513   | No significant S.c. match                                                                                  |
| CA1410 | 1.0  | 1.0 | 0.9 | GAT1       | 6031344..6 nitrogen regulation (by      | orf19.1275  | 12290 CaSPT16    | CELL CYC transcription regulator activity                                                                  |
| CA1411 | 1.3  | 1.1 | 1.0 | IPF11858   | complemer unknown function              | orf19.1277  | 11858 CaGAT1     | Nitrogen ar transcription regulator activity                                                               |
| CA1412 | 1.1  | 1.0 | 1.1 | IPF11854   | complemer unknown function              | orf19.1278  | 11854 IPF11858   | No significant S.c. match                                                                                  |
| CA1413 | 1.2  | 1.1 | 1.1 | MTR3       | 6040777..6 Involved in mRNA tran        | orf19.168   | 16693 IPF11854   | No significant S.c. match                                                                                  |
| CA1414 | 1.0  | 1.0 | 0.9 | CHO2       | complemer phosphatidylethanolarr        | orf19.169   | 19594 CaMTR3     | TRANSCR RNA binding                                                                                        |
| CA1415 | 1.2  | 1.2 | 1.0 | DBP2.EXO   | complemer ATP-dependent RNA t           | orf19.170   | 18681 CaCHO2     | Lipid fatty-: transferase activity                                                                         |
| CA1416 | 1.0  | 1.0 | 1.0 | DBP2.EXO   | complemer ATP-dependent RNA t           | orf19.171   | 17362 CaDBP2.e   | TRANSCRIPTION SUBCELLULAR LOCALISATION                                                                     |
| CA1417 | 1.0  | 0.9 | 1.0 | IPF16126   | complemer similar to Saccharomy         | orf19.172   | 16126 CaDBP2.e   | TRANSCR RNA binding,helicase activity                                                                      |
| CA1418 | 0.9  | 1.0 | 1.0 | IPF16124   | complemer zinc-finger containing r      | orf19.173   | 16124 IPF16126   | TRANSCR nucleotidyltransferase activity                                                                    |
| CA1419 | 0.7  | 0.5 | 1.0 | IPF17296   | complemer unknown function              | orf19.175   | 17296 IPF16124   | TRANSCR DNA binding                                                                                        |
| CA1420 | 1.1  | 1.0 | 1.1 | RNT1       | complemer Ribonuclease III (by hc       | orf19.1127  | 14250 IPF17296   | CELL CYCLE AND DNA PROCESSING SUBCELLULAR LOCALISATION                                                     |
| CA1421 | 1.1  | 1.0 | 1.1 | MRPL11     | 6063038..6 Mitochondrial ribosom        | orf19.11271 | 14249 CaRNT1     | TRANSCR RNA binding                                                                                        |
| CA1422 | 0.9  | 0.9 | 0.9 | IPF14248   | 6064228..6 putative methyltransfer      | orf19.3798  | 14248 CaMRPL11   | PROTEIN t structural molecule activity                                                                     |
| CA1423 | 1.1  | 1.2 | 1.0 | IPF14247   | complemer unknown function              | orf19.3799  | 14247 IPF14248   | UNCLASSIprotein binding                                                                                    |
| CA1424 | 0.9  | 1.0 | 1.0 | IPF9090    | complemer unknown function              | orf19.1128: | 9090 IPF14247    | SUBCELLL molecular_function unknown                                                                        |

|        |     |     |     |            |                                                 |       |            |                                                                                                       |
|--------|-----|-----|-----|------------|-------------------------------------------------|-------|------------|-------------------------------------------------------------------------------------------------------|
| CA1426 | 1.0 | 0.8 | 1.0 | ALS11.3F   | 6081393..6 agglutinin-like protein, orf19.1316i | 9917  | IPF9090    | No significant S.c. match                                                                             |
| CA1427 | 1.0 | 0.9 | 1.0 | IPF9914    | 6084925..6 alanyl-tRNA synthetase orf19.5746    | 9914  | CaALS11.3  | SUBCELLULAR LOCALISATION Other virulence attributes                                                   |
| CA1428 | 1.1 | 0.9 | 1.0 | MRP4       | complemer Ribosomal protein of t orf19.1317i    | 15124 | IPF9914    | PROTEIN ligase activity                                                                               |
| CA1429 | 1.0 | 1.0 | 1.1 | IPF15123   | 6089555..6 unknown function orf19.1317          | 15123 | CaMRP4     | PROTEIN RNA binding, structural molecule activity                                                     |
| CA1430 | 1.1 | 0.9 | 1.0 | IPF14331   | 6096149..6 Probable extracellular orf19.3380    | 14331 | IPF15123   | No significant S.c. match                                                                             |
| CA1431 | 4.7 | 5.6 | 2.1 | FET34.3E   | 6109997..6 iron transport multicop orf19.1206   | 12467 | IPF14331   | No significant S.c. match                                                                             |
| CA1432 | 0.7 | 0.5 | 0.8 | APM3       | 6111900..6 AP-3 complex subunit, orf19.1204     | 12465 | CaFET34.3  | CELLULAR TRANSPORT AND TRANSPORT MECHANISMS REGULATION OF/INTERACTION WITH CELLULAR ENVIRONMENT SUB   |
| CA1433 | 0.9 | 1.0 | 1.0 | IPF12464   | complemer unknown function                      | 12464 | CaAPM3     | CELLULAF molecular_function unknown                                                                   |
| CA1434 | 1.0 | 1.0 | 1.0 | SN12       | 6114195..6 Sec9 interacting protei orf19.1203   | 12463 | IPF12464   | No significant S.c. match                                                                             |
| CA1435 | 1.0 | 1.1 | 1.0 | IPF7166    | 6117655..6 unknown function orf19.1202          | 7166  | CaSN12     | CELLULAF molecular_function unknown                                                                   |
| CA1436 | 0.9 | 1.0 | 1.1 | IPF7165    | complemer similar to Saccharomy orf19.1201      | 7165  | IPF7166    | CELLULAR TRANSPORT AND TRANSPORT MECHANISMS SUBCELLULAR LOCALISATION                                  |
| CA1437 | 1.0 | 0.9 | 0.9 | IPF7163    | 6120582..6 unknown function orf19.1200          | 7163  | IPF7165    | PROTEIN ligase activity                                                                               |
| CA1438 | 1.0 | 1.2 | 0.9 | NOP58      | 6122042..6 nucleolar protein requi orf19.1199   | 7161  | IPF7163    | No significant S.c. match                                                                             |
| CA1439 | 1.1 | 1.1 | 1.2 | IPF19602   | complemer similar to Saccharomy orf19.4488      | 19602 | CaNOP58    | TRANSCR molecular_function unknown                                                                    |
| CA1440 | 2.3 | 1.6 | 1.3 | RPL17B     | 6132795..6 RPL17B ribosomal pro orf19.4490      | 4772  | IPF19602   | C-compour transcription regulator activity                                                            |
| CA1441 | 1.0 | 1.1 | 1.0 | QCR8       | 6134541..6 ubiquinol-cytochrome-c reductase     | 4774  | CaRPL17B   | PROTEIN structural molecule activity                                                                  |
| CA1442 | 1.1 | 1.0 | 0.9 | ERG20      | complemer farnesyl-pyrophosphat orf19.4491      | 4775  | CaQCR8     | ENERGY transporter activity, oxidoreductase activity                                                  |
| CA1443 | 1.0 | 1.1 | 1.0 | IPF4776    | complemer unknown Function orf19.4492           | 4776  | CaERG20    | Lipid fatty- transferase activity                                                                     |
| CA1444 | 1.0 | 1.0 | 0.9 | KTR2       | complemer mannosyltransferase (lorf19.4494      | 4778  | IPF4776    | TRANSCR molecular_function unknown                                                                    |
| CA1445 | 1.0 | 1.0 | 1.0 | MRP51      | 6142233..6 Mitochondrial ribosom: orf19.185     | 13417 | CaKTR2     | C-compour transferase activity                                                                        |
| CA1446 | 1.0 | 0.9 | 1.0 | YAL011     | complemer mitochondrial transit p orf19.190     | 15052 | CaMRP51    | PROTEIN structural molecule activity                                                                  |
| CA1447 | 1.0 | 0.9 | 1.1 | NRK1       | complemer Cdc31p-interacting ser orf19.191      | 15055 | CaYAL011   | SUBCELLULAR LOCALISATION                                                                              |
| CA1448 | 1.0 | 1.1 | 1.1 | IPF14728   | complemer unknown function orf19.192            | 14728 | CaNRK1     | CELL CYCLE AND DNA PROCESSING CONTROL OF CELLULAR ORGANIZATION                                        |
| CA1449 | 1.0 | 1.0 | 1.1 | IPF14730.6 | 6153650..6 unknown function, 5-pr orf19.193     | 14730 | IPF14728   | No significant S.c. match                                                                             |
| CA1450 | 1.0 | 1.0 | 1.1 | IPF6474    | complemer unknown function orf19.4414           | 6474  | IPF14730.6 | No significant S.c. match                                                                             |
| CA1452 | 1.1 | 1.2 | 1.1 | REV1       | 6158529..6 DNA repair protein (by orf19.4412    | 6472  | IPF6474    | TRANSCRIPTION SUBCELLULAR LOCALISATION                                                                |
| CA1453 | 1.0 | 1.0 | 1.1 | HOS1       | 6162044..6 Putative histon deacet orf19.4411    | 6469  | CaREV1     | CELL CYC nucleotidyltransferase activity                                                              |
| CA1454 | 1.0 | 1.0 | 1.0 | ALG1       | complemer beta-1,4-mannosyltran orf19.4410      | 19918 | CaHOS1     | TRANSCR hydrolase activity                                                                            |
| CA1455 | 1.0 | 0.9 | 1.0 | IPF15081   | 6165189..6 phophodiesterase (by lorf19.4409     | 15081 | CaALG1     | C-compour transferase activity                                                                        |
| CA1456 | 1.0 | 0.9 | 1.0 | IPF11835.3 | complemer unknown function                      | 15083 | IPF15081   | UNCLASSI molecular_function unknown                                                                   |
| CA1457 | 0.9 | 1.1 | 1.0 | IPF8287    | 6171083..6 unknown function orf19.612           | 8287  | IPF11835.3 | No significant S.c. match                                                                             |
| CA1458 | 5.2 | 1.5 | 1.7 | IPF6342    | 6191478..6 unknown function orf19.1106          | 6342  | IPF8287    | UNCLASSI molecular_function unknown                                                                   |
| CA1459 | 0.9 | 0.9 | 0.9 | IPF6340    | 6194741..6 unknown function orf19.1107          | 6340  | IPF6342    | No significant S.c. match                                                                             |
| CA1460 | 1.1 | 1.0 | 1.0 | HAM1       | complemer Controls 6-N-hydroxyle orf19.1108     | 6339  | IPF6340    | UNCLASSIFIED PROTEINS                                                                                 |
| CA1461 | 1.0 | 1.0 | 1.0 | IPF6338    | complemer unknown function orf19.1109           | 6338  | CaHAM1     | CELL RES molecular_function unknown                                                                   |
| CA1462 | 1.0 | 0.9 | 0.9 | THI80      | complemer Thiamin pyrophosphok orf19.8707       | 6335  | IPF6338    | No significant S.c. match                                                                             |
| CA1464 | 0.9 | 0.9 | 0.8 | PYC2.EXO   | 6201408..6 Pyruvate carboxylase ;orf19.789      | 15167 | CaTHI80    | Metabolism transferase activity                                                                       |
| CA1465 | 1.0 | 1.0 | 1.0 | RIM11      | complemer Ser/thr protein kinase (orf19.791     | 18668 | CaPYC2.e   | C-compour ligase activity                                                                             |
| CA1466 | 0.2 | 0.1 | 0.2 | IPF13324   | complemer unknown function orf19.8411           | 13324 | CaRIM11    | CELL CYCLE AND DNA PROCESSING TRANSCRIPTION SUBCELLULAR LOCALISATION                                  |
| CA1467 | 1.2 | 0.9 | 0.9 | IPF5082    | complemer similar to Saccharomy orf19.8412      | 5082  | IPF13324   | No significant S.c. match                                                                             |
| CA1468 | 1.0 | 1.0 | 1.0 | SRB10      | complemer cyclin-dependent kinas orf19.794      | 5080  | IPF5082    | CELL CYC protein kinase activity                                                                      |
| CA1469 | 0.9 | 1.0 | 1.0 | IPF5078    | complemer unknown function orf19.8414           | 5078  | CaSRB10    | C-compour protein kinase activity, transcription regulator activity                                   |
| CA1470 | 1.0 | 1.0 | 1.1 | IPF17942   | 6214621..6 unknown function orf19.8415          | 17942 | IPF5078    | PROTEIN signal transducer activity                                                                    |
| CA1471 | 0.9 | 0.9 | 1.1 | ALS2.3FE   | complemer agglutinin-like protein, orf19.1098   | 15450 | IPF17942   | CELL FATI transcription regulator activity                                                            |
| CA1474 | 0.9 | 1.0 | 1.0 | IPF10208   | complemer chloride channel-like p orf19.1096    | 10208 | CaALS2.3f  | SUBCELLULAR LOCALISATION Other virulence attributes                                                   |
| CA1475 | 0.9 | 0.9 | 0.9 | GLE2       | 6231541..6 nuclear pore complex ;orf19.1095     | 10209 | IPF10208   | CELLULAR TRANSPORT AND TRANSPORT MECHANISMS REGULATION OF/INTERACTION WITH CELLULAR ENVIRONMENT SUB   |
| CA1476 | 1.0 | 1.0 | 1.0 | IPF10214   | 6235149..6 unknown function orf19.1093          | 10214 | CaGLE2     | TRANSCR structural molecule activity                                                                  |
| CA1477 | 0.5 | 1.0 | 0.4 | YME1       | complemer family of ATPases orf19.1252          | 14644 | IPF10214   | No significant S.c. match                                                                             |
| CA1478 | 1.0 | 0.9 | 1.0 | IPF16426   | 6245915..6 similar to human BRR1 orf19.1251     | 16426 | CaYME1     | PROTEIN Ipeptidase activity                                                                           |
| CA1479 | 1.0 | 0.9 | 1.0 | IPF16428   | complemer unknown function orf19.1250           | 16428 | IPF16426   | CELL CYC molecular_function unknown                                                                   |
| CA1480 | 1.0 | 0.9 | 0.9 | HIS6       | 6249378..65 Pro-FAR isomerase orf19.1249        | 15577 | IPF16428   | UNCLASSI molecular_function unknown                                                                   |
| CA1481 | 1.0 | 1.1 | 1.0 | RPB3       | complemer DNA-directed RNA-pol orf19.8832       | 15576 | CaHIS6     | Amino acid isomerase activity                                                                         |
| CA1482 | 1.0 | 0.9 | 1.0 | IPF15575   | 6251477..6 unknown function orf19.8831          | 15575 | CaRPB3     | TRANSCR nucleotidyltransferase activity                                                               |
| CA1483 | 1.0 | 1.0 | 1.0 | YHC3       | complemer involved in cellular pH orf19.4059    | 10526 | IPF15575   | No significant S.c. match                                                                             |
| CA1484 | 1.0 | 1.0 | 1.0 | ARO4       | 6259877..6 3-dehydro-deoxyphos orf19.4060       | 10524 | CaYHC3     | CLASSIFIC molecular_function unknown                                                                  |
| CA1485 | 1.0 | 1.0 | 1.1 | IPF20082   | complemer unknown function orf19.4061           | 20082 | CaARO4     | Amino acid transferase activity                                                                       |
| CA1486 | 1.0 | 1.0 | 1.1 | IPF10521   | complemer unknown function orf19.4062           | 10521 | IPF20082   | UNCLASSI molecular_function unknown                                                                   |
| CA1487 | 0.9 | 0.9 | 1.0 | GPT1       | complemer polyamine transporter orf19.4063      | 10519 | IPF10521   | No significant S.c. match                                                                             |
| CA1488 | 0.9 | 1.0 | 0.9 | IPF17402   | 6267628..6 unknown function orf19.4064          | 17402 | CaGPT1     | No significant S.c. match                                                                             |
| CA1489 | 1.2 | 1.6 | 1.0 | ATP3.3     | complemer F1FO-ATPase complex orf19.1073        | 163   | IPF17402   | SUBCELLL transferase activity                                                                         |
| CA1490 | 0.9 | 1.0 | 0.9 | IPF165     | complemer unknown function                      | 165   | CaATP3.3   | ENERGY C transporter activity                                                                         |
| CA1491 | 1.1 | 1.1 | 1.1 | IPF166     | 6273822..6 unknown function orf19.3225          | 166   | IPF165     | No significant S.c. match                                                                             |
| CA1492 | 1.2 | 1.0 | 1.2 | IPF168     | 6277773..6 unknown function orf19.3226          | 168   | IPF166     | TRANSPO molecular_function unknown                                                                    |
| CA1493 | 1.1 | 1.0 | 1.0 | FTH2       | 6279115..6 iron transporter (by hoi orf19.3227  | 170   | IPF168     | UNCLASSI molecular_function unknown                                                                   |
| CA1494 | 1.2 | 1.1 | 1.2 | IPF171     | complemer unknown function orf19.3228           | 171   | CaFTH2     | REGULATION OF/INTERACTION WITH CELLULAR ENVIRONMENT TRANSPORT FACILITATION Other virulence attributes |
| CA1495 | 1.0 | 1.0 | 1.0 | IPF9686    | 6289847..6 similar to Saccharomy orf19.3647     | 9686  | IPF171     | UNCLASSI molecular_function unknown                                                                   |
| CA1496 | 1.7 | 1.6 | 2.1 | CTR1       | complemer copper transport protei orf19.3646    | 9685  | IPF9686    | CELLULAF protein binding                                                                              |
| CA1497 | 0.9 | 1.0 | 1.0 | IPF9683    | complemer unknown function orf19.3644           | 9683  | CaCTR1     | CELLULAF transporter activity                                                                         |
| CA1498 | 0.9 | 0.9 | 1.0 | IPF12371   | complemer extracellular alpha-1,4- orf19.3643   | 12371 | IPF9683    | TRANSCRIPTION                                                                                         |
| CA1499 | 0.8 | 0.8 | 1.0 | IPF6521.3f | 6303710..6 similar to Saccharomyces cerevisi    | 13224 | IPF12371   | TRANSCRIPTION                                                                                         |
| CA1500 | 0.8 | 0.9 | 0.8 | IPF13221   | 6308626..6 unknown function orf19.1697          | 13221 | IPF6521.3f | TRANSCRIPTION SUBCELLULAR LOCALISATION                                                                |
| CA1501 | 1.0 | 1.0 | 1.0 | IPF13217   | complemer unknown function orf19.9265           | 13217 | IPF13221   | UNCLASSI molecular_function unknown                                                                   |

|        |     |     |     |            |                                                |       |            |                                                    |                                                    |                                        |
|--------|-----|-----|-----|------------|------------------------------------------------|-------|------------|----------------------------------------------------|----------------------------------------------------|----------------------------------------|
| CA1502 | 0.4 | 0.7 | 0.6 | RPS7A      | complemer ribosomal protein (b orf19.9267      | 13662 | IPF13217   | UNCLASSI                                           | molecular_function                                 | unknown                                |
| CA1503 | 1.0 | 1.0 | 1.0 | RK11       | 6315794..6 D-ribose-5-phosphate orf19.9268     | 13663 | CaRPS7A    | PROTEIN                                            | structural molecule                                | activity                               |
| CA1504 | 1.4 | 1.3 | 1.3 | ARF3       | complemer GTP-binding protein of orf19.1702    | 13664 | CaRK11     | C-compou                                           | isomerase                                          | activity                               |
| CA1505 | 1.0 | 0.9 | 1.0 | POT1       | 6319848..6 Acetyl-CoA C-acyltrans:orf19.9271   | 17552 | CaARF3     | PROTEIN FATE [folding modification destination] "" | CELLULAR TRANSPORT AND TRANSPORT MECHANISMS        |                                        |
| CA1506 | 0.9 | 1.1 | 0.9 | HGT11      | 6323821..6 hexose transporter orf19.4527       | 9983  | CaPOT1     | Lipid fatty-acid and isoprenoid metabolism ""      | ENERGY SUBCELLULAR LOCALISATION                    |                                        |
| CA1507 | 1.1 | 1.1 | 1.0 | HSP30      | 6328488..6 heat shock protein (by orf19.4526   | 9978  | CaHGT11    | C-compou                                           | molecular_function                                 | unknown                                |
| CA1508 | 1.0 | 0.8 | 1.1 | IPF9977    | 6329966..6 unknown function orf19.4525         | 9977  | CaHSP30    | CELL RES                                           | chaperone                                          | activity                               |
| CA1509 | 0.9 | 0.9 | 0.9 | IPF19920.3 | complemer unknown function, 3-pr orf19.4524    | 19920 | IPF9977    | UNCLASSI                                           | molecular_function                                 | unknown                                |
| CA1510 | 0.9 | 1.0 | 0.9 | IPF9973    | 6333605..6 similar to Saccharomy:orf19.4523    | 9973  | IPF19920.3 | Amino acid metabolism                              | TRANSCRIPTION SUBCELLULAR LOCALISATION             |                                        |
| CA1511 | 1.0 | 1.0 | 1.0 | IPF9972.3f | complemer unknown function, 3-pr orf19.4522    | 9972  | IPF9973    | Metabolism                                         | ligase                                             | activity                               |
| CA1512 | 1.0 | 1.0 | 1.0 | IPF15255   | 6341070..6 unknown function orf19.4884         | 15255 | IPF9972.3f | ENERGY                                             | molecular_function                                 | unknown                                |
| CA1513 | 1.1 | 1.4 | 1.1 | MIR1       | 6346913..6 phosphate transport pr orf19.4885   | 7536  | IPF15255   | CLASSIFIC                                          | molecular_function                                 | unknown                                |
| CA1514 | 1.0 | 0.8 | 1.1 | IPF7539    | 6349709..6 unknown function orf19.4886         | 7539  | CaMIR1     | Phosphate transporter                              | activity                                           |                                        |
| CA1515 | 0.7 | 0.5 | 0.8 | ECM21.3    | complemer Involved in cell wall bic:orf19.1235 | 18663 | IPF7539    | No significant S.c. match                          |                                                    |                                        |
| CA1516 | 1.0 | 1.0 | 1.0 | IPF16764   | 6355294..6 unknown function orf19.4796         | 16764 | CaECM21.3  | CONTROL                                            | molecular_function                                 | unknown                                |
| CA1517 | 1.0 | 1.3 | 0.9 | IPF11045   | complemer unknown function orf19.4798          | 11045 | IPF16764   | PROTEIN SYNTHESIS                                  | SUBCELLULAR LOCALISATION                           |                                        |
| CA1518 | 1.0 | 1.0 | 1.1 | IPF11040   | 6360312..6 similar to Schizosacch:orf19.4799   | 11040 | IPF11045   | UNCLASSI                                           | molecular_function                                 | unknown                                |
| CA1519 | 1.0 | 1.1 | 1.0 | RIM20      | 6362353..6 Rim101 activating prot orf19.4800   | 11037 | IPF11040   | CELL CYC                                           | RNA binding                                        |                                        |
| CA1520 | 1.0 | 1.0 | 1.0 | IPF11035   | 6364914..6 similar to Saccharomy:orf19.4801    | 11035 | CaRIM20    | UNCLASSI                                           | molecular_function                                 | unknown                                |
| CA1521 | 1.0 | 1.0 | 1.1 | FTH1       | complemer iron transporter orf19.4802          | 11034 | IPF11035   | TRANSCR                                            | transferase                                        | activity                               |
| CA1522 | 1.0 | 0.9 | 1.0 | IPF6916    | complemer unknown function orf19.3791          | 6916  | CaFTH1     | REGULATI                                           | molecular_function                                 | unknown                                |
| CA1523 | 1.0 | 1.0 | 1.0 | PAT1       | 6372742..6 Topoisomerase II-assc:orf19.3792    | 6915  | IPF6916    | No significant S.c. match                          |                                                    |                                        |
| CA1524 | 1.0 | 1.1 | 1.1 | SUR1       | 6380868..6 Suppressor of ROK1 orf19.3794       | 6909  | CaPAT1     | CELL CYC                                           | molecular_function                                 | unknown                                |
| CA1525 | 1.0 | 0.9 | 1.0 | AGP3       | 6383816..6 amino acid-permease orf19.3795      | 6906  | CaSUR1     | TRANSCR                                            | DNA binding                                        |                                        |
| CA1526 | 1.0 | 1.3 | 1.0 | IPF13815   | 6398814..6 unknown function orf19.4553         | 13815 | CaAGP3     | Amino acid transporter                             | activity                                           |                                        |
| CA1528 | 1.0 | 1.2 | 1.1 | ALS4.3F    | 6408890..6 agglutinin-like protein, orf19.4556 | 13009 | IPF13815   | No significant S.c. match                          |                                                    |                                        |
| CA1529 | 1.0 | 1.0 | 1.0 | SPC105     | 6411436..6 Spindle pole body prot orf19.4557   | 15446 | CaALS4.3F  | C-compound and carbohydrate metabolism             | SUBCELLULAR LOCALISATION                           | Other virulence attributes             |
| CA1530 | 1.1 | 1.0 | 1.0 | ALG2.5     | 6418468..6 mannosyltransferase, orf19.1221     | 9503  | CaSPC105   | SUBCELL                                            | structural molecule                                | activity                               |
| CA1531 | 1.1 | 1.3 | 1.0 | RVS167     | complemer (putative) cytoskeletal orf19.1220   | 9505  | CaALG2.5   | C-compou                                           | transferase                                        | activity                               |
| CA1532 | 0.9 | 0.9 | 0.8 | IPF9507    | 6421659..6 unknown function orf19.8806         | 9507  | CaRVS167   | CELL FATI                                          | protein binding                                    |                                        |
| CA1533 | 1.0 | 0.9 | 0.9 | IPF9510    | complemer unknown function orf19.8803          | 9510  | IPF9507    | UNCLASSI                                           | molecular_function                                 | unknown                                |
| CA1534 | 0.9 | 1.0 | 1.1 | MAP2       | 6428609..6 methionine aminopepti orf19.1214    | 9511  | IPF9510    | No significant S.c. match                          |                                                    |                                        |
| CA1535 | 1.0 | 1.0 | 1.0 | IPF9515    | 6432481..6 similar to Saccharomy:orf19.8800    | 9515  | CaMAP2     | PROTEIN                                            | peptidase                                          | activity                               |
| CA1536 | 1.0 | 1.1 | 1.0 | SOK1       | 6443209..6 high copy suppressor orf19.451      | 13595 | IPF9515    | C-compou                                           | protein binding                                    |                                        |
| CA1537 | 1.0 | 1.0 | 1.0 | IPF17483   | complemer unknown function orf19.450           | 17483 | CaSOK1     | TRANSCR                                            | molecular_function                                 | unknown                                |
| CA1538 | 1.1 | 1.2 | 1.1 | ID11.3EOC  | complemer Isopentenyl-diphospha orf19.4558     | 1053  | IPF17483   | No significant S.c. match                          |                                                    |                                        |
| CA1539 | 1.0 | 1.0 | 1.0 | BFR1       | 6456504..6 Similar to Saccharomy orf19.4560    | 1051  | CaID11.3ec | Lipid fatty-acid and isoprenoid metabolism ""      | SUBCELLULAR LOCALISATION                           |                                        |
| CA1540 | 1.0 | 0.9 | 1.1 | IPF1047    | 6458249..6 unknown function orf19.4563         | 1047  | CaBFR1     | CELL CYC                                           | RNA binding                                        |                                        |
| CA1541 | 1.2 | 1.1 | 1.1 | BGL21      | 6460091..6 endo-beta-1,3-glucana orf19.4565    | 1046  | IPF1047    | UNCLASSI                                           | molecular_function                                 | unknown                                |
| CA1542 | 1.0 | 1.1 | 1.0 | ROT11      | 6461381..6 Putative membrane pr:orf19.4566     | 1044  | CaBGL21    | C-compou                                           | hydrolase                                          | activity                               |
| CA1543 | 1.1 | 1.1 | 1.0 | IPF1043    | 6462725..6 Similar to hydroxyquin:orf19.4567   | 1043  | CaROT11    | CELL CYCLE AND DNA PROCESSING                      |                                                    |                                        |
| CA1544 | 0.9 | 0.8 | 0.9 | IPF1040    | 6464496..6 Similar to transcription:orf19.4568 | 1040  | IPF1043    | No significant S.c. match                          |                                                    |                                        |
| CA1545 | 0.9 | 0.8 | 1.0 | CDR3.5EO   | complemer ABC transporter, multi:orf19.1313    | 14709 | IPF1040    | C-compou                                           | and carbohydrate metabolism                        | TRANSCRIPTION SUBCELLULAR LOCALISATION |
| CA1546 | 0.9 | 1.1 | 1.0 | IPF6671    | 6475739..6 unknown function orf19.8891         | 6671  | CaCDR3.5   | Lipid fatty-acid and isoprenoid metabolism ""      | ""CELL RESCUE DEFENSE AND VIRULENCE ""             | REGULATION OF/INTERACTION WITH CE      |
| CA1547 |     |     |     | IPF6672    | complement(6478315..6480216)                   | 8746  | IPF6671    | UNCLASSI                                           | molecular_function                                 | unknown                                |
| CA1548 | 1.5 | 1.4 | 1.4 | IPF8746    | 6485521..6 putative alpha-1,3-mar orf19.4279   | 8746  | IPF8746    | C-compound and carbohydrate metabolism ""          | PROTEIN FATE [folding modification destination] "" | SUBCELLULAR LOCALISATION               |
| CA1549 | 1.1 | 1.0 | 1.0 | IPF8744    | 6488638..6 unknown function orf19.4278         | 8742  | IPF8744    | TRANSCR                                            | molecular_function                                 | unknown                                |
| CA1550 | 0.9 | 0.9 | 1.0 | IPF8741.5f | 6491170..6 unknown function, 5-pr orf19.4276   | 8741  | IPF8741.5f | No significant S.c. match                          |                                                    |                                        |
| CA1551 | 1.0 | 0.9 | 1.0 | IPF8741.3f | 6492327..6 unknown function, 3-pr orf19.4275   | 8739  | IPF8741.3f | CELL CYC                                           | protein binding                                    |                                        |
| CA1552 | 0.5 | 0.5 | 0.4 | PUT1       | complemer proline oxidase (by hor orf19.4274   | 14081 | CaPUT1     | Amino acid oxidoreductase                          | activity                                           |                                        |
| CA1553 | 1.0 | 1.0 | 1.0 | IPF14081   | complemer unknown function orf19.1714          | 14077 | IPF14081   | No significant S.c. match                          |                                                    |                                        |
| CA1554 | 1.0 | 1.0 | 1.1 | GEA2.3F    | complemer GTP/GDP exchange fe:orf19.1713       | 15676 | CaGEA2.3f  | CELLULAF                                           | enzyme regulator                                   | activity                               |
| CA1555 | 1.0 | 1.1 | 0.9 | END3       | 6505531..6 required for endocytos orf19.1711   | 15677 | CaEND3     | CELLULAF                                           | protein binding                                    |                                        |
| CA1557 | 1.0 | 1.0 | 0.9 | IPF15677   | complemer probable NADH-ubiqui orf19.1710      | 15679 | IPF15677   | No significant S.c. match                          |                                                    |                                        |
| CA1558 | 0.6 | 0.4 | 0.6 | IPF15679   | complemer lipid transfer protein (b orf19.1709 | 16533 | IPF15679   | No significant S.c. match                          |                                                    |                                        |
| CA1559 | 0.8 | 0.7 | 0.8 | IPF16533   | 6510839..6 unknown function orf19.1708         | 16088 | IPF16533   | No significant S.c. match                          |                                                    |                                        |
| CA1560 | 0.9 | 0.9 | 0.9 | MET18      | complemer Involved in NER repair orf19.1706    | 16087 | CaMET18    | CELL CYC                                           | transcription regulator                            | activity                               |
| CA1561 | 1.0 | 0.9 | 0.9 | POT12      | complemer peroxysomal 3-ketoacy:orf19.1704     | 13855 | CaPOT12    | Lipid fatty-acid and isoprenoid metabolism ""      | ENERGY SUBCELLULAR LOCALISATION                    |                                        |
| CA1563 | 0.7 | 0.4 | 0.9 | IPF13855   | 6535766..6 unknown function orf19.4713         | 7609  | IPF13855   | No significant S.c. match                          |                                                    |                                        |
| CA1564 | 1.9 | 3.0 | 2.6 | GAD1       | complemer Glutamate decarboxylz:orf19.1153     | 7610  | CaGAD1     | Amino acid                                         | lyase                                              | activity                               |
| CA1565 | 1.0 | 1.3 | 1.1 | EGD1       | complemer GAL4 DNA-binding enl:orf19.1154      | 7611  | CaEGD1     | C-compou                                           | chaperone                                          | activity                               |
| CA1566 | 0.8 | 0.7 | 1.0 | DPP2       | 6543266..6 Diacylglycerol pyropho orf19.1155   | 7613  | CaDPP2     | Lipid fatty-acid and isoprenoid metabolism ""      | CELL CYCLE AND DNA PROCESSING                      | CELL FATE                              |
| CA1567 | 0.9 | 0.9 | 1.0 | IPF7613    | 6544566..6 unknown function orf19.1156         | 7615  | IPF7613    | CELL RESCUE DEFENSE AND VIRULENCE ""               | SUBCELLULAR LOCALISATION                           |                                        |
| CA1568 | 1.0 | 1.0 | 0.9 | IPF7615    | complemer unknown function orf19.1158          | 7616  | IPF7615    | UNCLASSIFIED                                       | PROTEINS                                           |                                        |
| CA1569 | 1.0 | 1.1 | 1.0 | IPF7616    | 6546850..6 putative homoserine O orf19.1159    | 7617  | IPF7616    | Amino acid                                         | metabolism                                         | SUBCELLULAR LOCALISATION               |
| CA1570 | 1.0 | 1.0 | 1.0 | IPF7617    | complemer unknown function orf19.1160          | 7619  | IPF7617    | UNCLASSI                                           | molecular_function                                 | unknown                                |
| CA1571 | 1.0 | 1.1 | 1.0 | SPO14.3Ei  | complemer phospholipase D, 3-prime end         | 15088 | CaSPO14.3  | Lipid fatty-acid and isoprenoid metabolism ""      | CELL CYCLE AND DNA PROCESSING                      | CELL FATE                              |
| CA1572 | 0.4 | 0.6 | 0.4 | POX4       | 6553045..6 peroxisomal fatty acyl-:orf19.9221  | 15087 | CaPOX4     | Lipid fatty-: oxidoreductase                       | activity                                           |                                        |
| CA1573 | 1.0 | 1.0 | 0.9 | IPF15087   | 6555631..6 unknown function orf19.1653         | 13474 | IPF15087   | UNCLASSIFIED                                       | PROTEINS                                           |                                        |
| CA1574 | 0.5 | 0.7 | 0.4 | PXP2       | complemer acyl-CoA oxidase pero orf19.1655     | 19734 | CaPXP2     | Lipid fatty-acid and isoprenoid metabolism ""      | ENERGY SUBCELLULAR LOCALISATION                    |                                        |
| CA1576 | 2.0 | 1.5 | 5.5 | HYR1       | 6570537..6 hyphally regulated prot orf19.1244i | 11410 | CaHYR1     | Hypha-specific                                     | No significant S.c. match                          |                                        |
| CA1577 | 0.9 | 0.9 | 0.9 | KNS1       | 6578007..6 Ser/thr protein kinase (orf19.1244i |       |            |                                                    |                                                    |                                        |

|        |     |     |     |            |                                                |                  |                                                                       |
|--------|-----|-----|-----|------------|------------------------------------------------|------------------|-----------------------------------------------------------------------|
| CA1578 | 1.0 | 0.9 | 0.9 | NUM11      | complemer nuclear migration proteorf19.4715    | 8243 CaKNS1      | CLASSIFICprotein kinase activity                                      |
| CA1579 | 1.0 | 1.0 | 1.1 | GDH3       | complemer NADP-glutamate dehyorf19.4716        | 8236 CaNUM11     | CELL CYC protein binding                                              |
| CA1580 | 0.9 | 1.0 | 1.0 | TRP5       | 6591781..6tryptophan synthase (t orf19.4718    | 8232 CaGDH3      | Amino acid oxidoreductase activity                                    |
| CA1581 | 1.0 | 0.8 | 0.9 | CWH41.3E   | complemer ER glucosidase I, 3-pri orf19.4719   | 8229 CaTRP5      | Amino acid lyase activity                                             |
| CA1582 | 1.1 | 1.0 | 1.5 | CLN21      | 6600806..6 G1 cyclin (by homolog:orf19.6028    | 15332 CaCWH41    | C-compour hydrolase activity                                          |
| CA1583 | 1.0 | 1.1 | 1.0 | ROT1       | 6605304..6 Suppressor of TOR2 r orf19.6029     | 18655 CaCLN21    | CELL CYC protein kinase activity,enzyme regulator activity            |
| CA1584 | 1.0 | 1.0 | 1.0 | IPF15824   | complemer unknown function orf19.6030          | 15824 CaROT1     | CELL CYC molecular_function unknown                                   |
| CA1585 | 0.8 | 0.8 | 0.9 | VPS27      | 6607805..6 Vacuolar protein sortin orf19.6031  | 15825 IPF15824   | No significant S.c. match                                             |
| CA1586 | 1.0 | 1.0 | 1.0 | ODC1       | 6611062..6 Ornithine decarboxylas orf19.6032   | 1466 CaVPS27     | PROTEIN I protein binding                                             |
| CA1587 | 0.5 | 0.4 | 1.0 | CMP2       | 6613123..6 Calcineurin B, catalytic orf19.6033 | 1465 CaODC1      | Secondary lyase activity                                              |
| CA1588 | 0.9 | 1.0 | 1.0 | SPT8       | 6619516..6 transcriptional adaptor orf19.1178  | 16990 CaCMP2     | TRANSCR protein phosphatase activity                                  |
| CA1589 | 0.9 | 0.9 | 0.9 | IPF16988   | complemer unknown function orf19.1178          | 16988 CaSPT8     | TRANSCR transcription regulator activity                              |
| CA1590 | 1.0 | 0.8 | 1.0 | IPF14665   | complemer unknown function orf19.1179          | 14665 IPF16988   | No significant S.c. match                                             |
| CA1591 | 1.0 | 0.9 | 1.0 | IPF14663   | 6625398..6 unknown function orf19.1179         | 14663 IPF14665   | UNCLASSIenzyme regulator activity                                     |
| CA1592 | 1.1 | 1.1 | 1.1 | IPF14662   | complemer D-xylose reductase (b) orf19.4317    | 14662 IPF14663   | UNCLASSIFIED PROTEINS                                                 |
| CA1593 | 0.9 | 0.9 | 0.9 | MIG1       | complemer transcriptional regulato orf19.4318  | 11048 IPF14662   | C-compour oxidoreductase activity                                     |
| CA1594 | 1.0 | 0.9 | 1.0 | IPF11051   | complemer unknown function orf19.4321          | 11051 CaMIG1     | C-compour transcription regulator activity                            |
| CA1595 | 0.9 | 0.9 | 1.0 | IPF9544    | 6636402..6 unknown function orf19.7905         | 9544 IPF11051    | No significant S.c. match                                             |
| CA1596 | 0.9 | 1.0 | 1.0 | FAA21      | 6640140..6 long-chain-fatty-acid-C orf19.272   | 9539 IPF9544     | UNCLASSImolecular_function unknown                                    |
| CA1597 | 1.0 | 0.9 | 0.9 | IPF9538    | complemer unknown function orf19.271           | 9538 CaFAA21     | Lipid fatty-ε ligase activity                                         |
| CA1598 | 0.9 | 1.0 | 1.0 | SES1       | complemer seryl-tRNA synthetase orf19.7901     | 9534 IPF9538     | ENERGY SUBCELLULAR LOCALISATION                                       |
| CA1599 | 1.0 | 0.9 | 0.9 | IPF11452   | 6646907..6 unknown function orf19.7900         | 11452 CaSES1     | No significε ligase activity                                          |
| CA1600 | 1.0 | 1.2 | 1.1 | CTR2       | 6650213..6 copper transport protei orf19.4720  | 15729 IPF11452   | CELL CYC molecular_function unknown                                   |
| CA1601 | 0.9 | 0.8 | 0.9 | IPF15728   | 6651071..6 unknown function orf19.4721         | 15728 CaCTR2     | CELLULAF transporter activity                                         |
| CA1602 | 1.0 | 1.0 | 1.1 | RTG1       | 6652812..6 basic helix-loop-helix t orf19.4722 | 13658 IPF15728   | No significant S.c. match                                             |
| CA1603 | 0.9 | 0.9 | 0.9 | FAD1       | complemer flavin adenine dinucleo orf19.4723   | 13656 CaRTG1     | C-compour transcription regulator activity                            |
| CA1604 | 1.0 | 1.0 | 1.0 | IPF13653   | complemer unknown function orf19.4724          | 13653 CaFAD1     | Metabolism nucleotidyltransferase activity                            |
| CA1605 | 1.1 | 1.1 | 1.0 | SWI6       | 6656250..6 Transcription factor (b) orf19.4725 | 17885 IPF13653   | TRANSCR RNA binding                                                   |
| CA1606 | 0.9 | 0.9 | 0.9 | NCS1       | complemer Calcium binding protei orf19.4726    | 16484 CaSWI6     | CELL CYC protein binding                                              |
| CA1607 | 1.1 | 1.0 | 0.9 | IPF14916   | 6659506..6 unknown function orf19.4727         | 16483 CaNCS1     | CELLULAR COMMUNICATION/SIGNAL TRANSDUCTION MECHANISM                  |
| CA1608 | 0.9 | 0.9 | 1.0 | TES12      | complemer Thiosterase (by homolo orf19.4122    | 5877 IPF14916    | UNCLASSImolecular_function unknown                                    |
| CA1609 | 0.9 | 0.9 | 1.0 | TES11      | complemer Thiosterase (by homolo orf19.4121    | 5879 CaTES12     | Lipid fatty-ε hydrolase activity                                      |
| CA1610 | 1.1 | 1.1 | 1.1 | LAS1       | 6667577..6 cell morphogenesis, cy orf19.4120   | 5882 CaTES11     | Lipid fatty-acid and isoprenoid metabolism ""SUBCELLULAR LOCALISATION |
| CA1611 | 0.7 | 0.8 | 0.6 | SPO72      | 6669692..6 required for sporulator orf19.4119  | 12198 CaLAS1     | CELL CYC molecular_function unknown                                   |
| CA1612 | 1.0 | 1.0 | 1.0 | IFJ6       | complemer unknown function orf19.3214          | 12814 CaSPO72    | CELL CYC molecular_function unknown                                   |
| CA1613 | 1.1 | 1.0 | 1.1 | IPF19735   | complemer unknown function orf19.3215          | 19735 CalFJ6     | No significant S.c. match                                             |
| CA1614 | 0.9 | 1.0 | 1.1 | IPF18645   | complemer unknown function orf19.1072          | 18645 IPF19735   | UNCLASSIFIED PROTEINS                                                 |
| CA1615 | 0.9 | 0.9 | 1.0 | IPF14540   | 6689569..6 putative multidrug proti orf19.3218 | 14540 IPF18645   | UNCLASSIFIED PROTEINS                                                 |
| CA1616 | 1.1 | 1.1 | 1.1 | IPF14538   | 6693378..6 unknown function orf19.3219         | 14538 IPF14540   | TRANSPO molecular_function unknown                                    |
| CA1617 | 1.0 | 0.9 | 0.9 | IPF14536   | 6695614..6 unknown function orf19.3220         | 14536 IPF14538   | UNCLASSIFIED PROTEINS                                                 |
| CA1618 | 1.2 | 1.2 | 1.1 | RRP45      | complemer Protein component of t orf19.1155    | 2068 IPF14536    | UNCLASSImolecular_function unknown                                    |
| CA1619 | 1.1 | 1.1 | 1.1 | IPF2067    | complemer Required for mannosyl orf19.1155     | 2067 CaRRP45     | TRANSCR RNA binding                                                   |
| CA1620 | 1.0 | 1.0 | 1.1 | MET10      | 6704455..6 Sulfite reductase flavin orf19.4076 | 13194 IPF2067    | Lipid fatty-ε transferase activity                                    |
| CA1621 | 1.0 | 0.9 | 1.0 | IFF6       | 6711242..6 unknown function orf19.1155         | 19647 CaMET10    | Amino acid transporter activity                                       |
| CA1622 | 1.0 | 1.1 | 1.0 | IPF10045   | 6715191..6 similar to Saccharomy orf19.470     | 10045 CalFF6     | No significant S.c. match                                             |
| CA1623 | 0.8 | 0.6 | 0.8 | STE7       | complemer MAP Kinase Kinase orf19.469          | 10048 IPF10045   | TRANSCR transcription regulator activity                              |
| CA1624 | 1.9 | 2.4 | 1.3 | IPF10055   | complemer unknown function orf19.467           | 10055 CaSTE7     | REGULATI protein kinase activity                                      |
| CA1625 | 1.0 | 1.0 | 0.9 | IPF6156    | 6732538..6 similar to C.elegans L1 orf19.1034  | 6156 IPF10055    | No significant S.c. match                                             |
| CA1626 | 1.0 | 1.0 | 1.0 | STR2       | complemer O-succinylhomoserine orf19.1033      | 6155 IPF6156     | UNCLASSIFIED PROTEINS                                                 |
| CA1627 | 0.9 | 0.9 | 0.9 | SKO1.3     | 6736495..6 Cre-binding bzip protei orf19.1032  | 6153 CaSTR2      | Amino acid transferase activity                                       |
| CA1628 | 1.0 | 1.0 | 1.0 | HMG1       | complemer 3-hydroxy-3-methylglu orf19.1031     | 19736 CaSKO1.3   | TRANSCR transcription regulator activity                              |
| CA1629 | 1.0 | 1.1 | 0.9 | NP146      | complemer proline cis-trans isome orf19.1030   | 14314 CaHMG1     | Lipid fatty-ε oxidoreductase activity                                 |
| CA1630 | 0.9 | 0.9 | 0.9 | RPP1       | 6745236..6 required for processing orf19.1029  | 14315 CaNP146    | PROTEIN I isomerase activity                                          |
| CA1631 | 1.0 | 1.0 | 0.9 | IPF19582   | complemer unknown function orf19.1028          | 19582 CaRPP1     | TRANSCR RNA binding                                                   |
| CA1632 | 1.0 | 1.0 | 1.0 | IPF10181   | 6750184..6 similar to Saccharomy orf19.1142    | 10823 IPF19582   | UNCLASSItranscription regulator activity                              |
| CA1633 | 0.7 | 0.7 | 1.0 | IPF10180   | complemer unknown function orf19.1142          | 10822 IPF10181   | UNCLASSIstructural molecule activity                                  |
| CA1634 | 0.9 | 1.0 | 1.0 | IPF10179   | 6752178..6 unknown function orf19.1142         | 10820 IPF10180   | No significant S.c. match                                             |
| CA1635 | 1.0 | 1.0 | 0.9 | URA7       | complemer CTP synthase 1 (by hc orf19.3941     | 10815 IPF10179   | UNCLASSImolecular_function unknown                                    |
| CA1636 | 1.0 | 1.0 | 1.0 | IPF20086   | complemer unknown function orf19.3942          | 20086 CaURA7     | Nucleotide ligase activity                                            |
| CA1637 | 2.2 | 1.9 | 1.4 | RPL43A.3   | complemer ribosomal protein, 3-prime end (b    | 20087 IPF20086   | UNCLASSImolecular_function unknown                                    |
| CA1638 | 0.9 | 1.0 | 0.8 | GRR1       | complemer Required for glucose r orf19.3944    | 14608 CaRPL43A   | PROTEIN I structural molecule activity                                |
| CA1639 | 1.0 | 0.9 | 1.1 | IPF18641.ε | 6763994..6 unknown function, exo orf19.1733    | 18641 CaGRR1     | C-compour protein binding                                             |
| CA1640 | 1.0 | 0.9 | 0.9 | IPF18641.ε | 6765639..6 unknown function, exo orf19.1732    | 18640 IPF18641.ε | UNCLASSIFIED PROTEINS                                                 |
| CA1641 | 1.1 | 1.2 | 1.1 | NHP10.3F   | complemer unknown function, 3-pr orf19.1731    | 9350 IPF18641.ε  | UNCLASSIFIED PROTEINS                                                 |
| CA1642 | 1.1 | 1.1 | 1.0 | NHP1.5F    | complemer unknown function, 5-pr orf19.1730    | 9349 CaNHP10.;   | CLASSIFIC molecular_function unknown                                  |
| CA1643 | 1.0 | 1.0 | 1.0 | IPF9347    | 6769829..6 unknown function orf19.1729         | 9347 CaNHP1.5    | CLASSIFICATION NOT YET CLEAR-CUT                                      |
| CA1644 | 1.1 | 1.0 | 0.9 | IPF9345    | complemer unknown function orf19.1728          | 9345 IPF9347     | No significant S.c. match                                             |
| CA1645 | 0.8 | 0.8 | 0.6 | PMC1       | 6774913..6 Ca2+-transporting P-ty orf19.1727   | 9340 IPF9345     | No significant S.c. match                                             |
| CA1646 | 1.0 | 1.3 | 1.0 | IPF9336.3f | complemer unknown function, 3-pr orf19.1725    | 9336 CaPMC1      | CELLULAF transporter activity                                         |
| CA1647 | 1.0 | 1.0 | 0.9 | IPF16663   | 6783732..6 unknown function orf19.5568         | 16663 IPF9336.3ε | No significant S.c. match                                             |
| CA1648 | 1.0 | 1.1 | 1.0 | IPF16662   | complemer unknown function orf19.5567          | 16662 IPF16663   | UNCLASSIprotein binding                                               |
| CA1649 | 1.0 | 1.0 | 1.0 | LAB1       | 6785702..6 Lipoate biosynthesis b) orf19.5566  | 5392 IPF16662    | TRANSCR RNA binding                                                   |

|        |     |     |     |            |                                                    |                  |                                                     |                                                                                     |         |
|--------|-----|-----|-----|------------|----------------------------------------------------|------------------|-----------------------------------------------------|-------------------------------------------------------------------------------------|---------|
| CA1650 | 1.1 | 1.0 | 1.0 | IPF5389    | 6788276..6 3-hydroxyisobutyrate dorf19.5565        | 5389 CaLAB1      | UNCLASSI                                            | molecular_function                                                                  | unknown |
| CA1651 | 0.8 | 0.9 | 0.9 | RNH1.EXC   | complemer Ribonuclease H, exon orf19.5564          | 18639 IPF5389    | No significant S.c. match                           |                                                                                     |         |
| CA1652 | 1.0 | 1.1 | 1.0 | RNH1.EXC   | complemer Ribonuclease H, exon orf19.5563          | 5387 CaRNH1.e    | Nucleotide metabolism                               | CONTROL OF CELLULAR ORGANIZATION                                                    |         |
| CA1653 | 1.1 | 1.2 | 1.1 | STE23      | complemer protease involved in a- orf19.5561       | 5385 CaRNH1.e    | Nucleotide                                          | RNA binding                                                                         |         |
| CA1654 | 1.1 | 1.1 | 1.0 | IPF19660   | complemer unknown function orf19.5559              | 19661 CaSTE23    | PROTEIN                                             | Ipeptidase activity                                                                 |         |
| CA1655 | 1.1 | 1.0 | 1.0 | CCC2       | complemer putative copper-transp orf19.4328        | 12705 IPF19660   | UNCLASSI                                            | molecular_function                                                                  | unknown |
| CA1656 | 0.9 | 1.1 | 0.9 | IPF16019   | complemer unknown function orf19.4326              | 16019 CaCCC2     | REGULATI                                            | transporter activity                                                                |         |
| CA1657 | 0.9 | 0.9 | 1.0 | IPF16022   | 6810308..6 unknown function orf19.4325             | 16022 IPF16019   | TRANSCR                                             | RNA binding                                                                         |         |
| CA1658 | 1.0 | 1.0 | 1.0 | IPF19924   | complemer unknown function orf19.4324              | 19924 IPF16022   | UNCLASSIFIED                                        | PROTEINS                                                                            |         |
| CA1659 | 0.9 | 1.0 | 1.0 | IPF11054   | 6814609..6 unknown function orf19.4323             | 11054 IPF19924   | No significant S.c. match                           |                                                                                     |         |
| CA1660 | 1.0 | 1.1 | 1.0 | DAP2       | complemer dipeptidyl orf19.4322                    | 11053 IPF11054   | UNCLASSI                                            | molecular_function                                                                  | unknown |
| CA1662 | 1.1 | 0.9 | 1.0 | RPL28.3F   | 6820892..6 Ribosomal protein, 3-prime end (b       | 7308 CaDAP2      | PROTEIN                                             | Ipeptidase activity                                                                 |         |
| CA1663 | 0.6 | 0.3 | 1.1 | IPF7309    | 6821859..6 unknown function orf19.2864             | 7309 CaRPL28.    | PROTEIN                                             | :RNA binding                                                                        |         |
| CA1664 | 0.9 | 1.0 | 1.0 | ERV1.3     | 6823051..6 Mitochondrial biogenesis and regu       | 7312 IPF7309     | UNCLASSI                                            | molecular_function                                                                  | unknown |
| CA1665 | 1.0 | 1.0 | 1.0 | RIB1       | 6826003..6 GTP cyclohydrolase II orf19.2862        | 18635 CaERV1.3   | CELL                                                | CYC oxidoreductase activity                                                         |         |
| CA1666 | 1.0 | 1.0 | 1.0 | SRP40      | 6827174..6 RNA I and II suppressor orf19.2859      | 19740 CaRIB1     | Metabolism                                          | hydrolase activity                                                                  |         |
| CA1667 | 1.0 | 1.0 | 0.9 | SSL2       | 6828822..6 by homology to S. cere orf19.2857       | 11402 CaSRP40    | TRANSCR                                             | chaperone activity                                                                  |         |
| CA1668 | 1.0 | 1.0 | 1.0 | IPF11396   | complemer unknown function orf19.2853              | 11396 CaSSL2     | CELL                                                | CYC DNA binding,helicase activity                                                   |         |
| CA1669 | 1.0 | 1.1 | 1.0 | IPF11393   | 6832844..6 unknown function orf19.2852             | 11393 IPF11396   | UNCLASSIFIED                                        | PROTEINS                                                                            |         |
| CA1670 | 1.0 | 0.9 | 1.0 | IPF11392   | 6834063..6 unknown function orf19.2851             | 11392 IPF11393   | PROTEIN                                             | :structural molecule activity                                                       |         |
| CA1671 | 1.0 | 1.0 | 1.0 | IPF11391   | complemer unknown function orf19.2851              | 11391 IPF11392   | Amino acid metabolism                               | CELLULAR TRANSPORT AND TRANSPORT MECHANISMS SUBCELLULAR LOCALISATION TRANSPORT FA   |         |
| CA1672 | 1.3 | 1.2 | 1.0 | IPF5196    | complemer unknown function orf19.1109              | 5196 IPF11391    | No significant S.c. match                           |                                                                                     |         |
| CA1673 | 3.2 | 2.0 | 1.5 | PST2       | 6840216..6 1,4-benzoquinone redt orf19.3612        | 5195 IPF5196     | No significant S.c. match                           |                                                                                     |         |
| CA1674 | 1.1 | 1.2 | 1.1 | PAF1       | 6841165..6 DNA-directed RNA pol orf19.3613         | 5194 CaPST2      | UNCLASSI                                            | molecular_function                                                                  | unknown |
| CA1675 | 0.9 | 0.9 | 0.9 | IPF5192    | complemer unknown function orf19.3615              | 5192 CaPAF1      | TRANSCR                                             | transcription regulator activity                                                    |         |
| CA1676 | 1.0 | 1.1 | 1.1 | ERG9       | complemer farnesyl-diphosphate fi orf19.3616       | 5191 IPF5192     | UNCLASSI                                            | molecular_function                                                                  | unknown |
| CA1677 | 1.0 | 1.0 | 0.9 | GTR1       | complemer GTP-binding protein by orf19.3617        | 5189 CaERG9      | Lipid fatty- $\epsilon$                             | transferase activity                                                                |         |
| CA1678 | 1.2 | 1.0 | 1.2 | IPF5185    | complemer putative cell wall prote orf19.3618      | 5185 CaGTR1      | Phosphate                                           | hydrolase activity                                                                  |         |
| CA1679 | 1.2 | 1.0 | 1.2 | IPF5180.3f | complemer unknown function, 3-prime end orf19.4913 | 18631 IPF5185    | SUBCELLULAR                                         | LOCALISATION                                                                        |         |
| CA1680 | 1.1 | 0.9 | 1.0 | IPF15649   | complemer unknown function orf19.4913              | 15649 IPF5180.3f | No significant S.c. match                           |                                                                                     |         |
| CA1681 | 0.2 | 0.0 | 0.9 | IPF12676   | 6863796..6 unknown function orf19.4914             | 12676 IPF15649   | UNCLASSI                                            | molecular_function                                                                  | unknown |
| CA1682 | 0.9 | 0.9 | 0.8 | CIRT3      | complemer Putative transposase orf19.4918          | 18629 IPF12676   | No signific                                         | molecular_function                                                                  | unknown |
| CA1683 | 1.2 | 1.1 | 1.1 | CIRT       | 6871560..6 Probable transposase orf19.4919         | 18628 CaCirt3    | No significant S.c. match                           |                                                                                     |         |
| CA1684 | 1.0 | 1.0 | 1.0 | IPF6070    | 6873866..6 unknown function orf19.4921             | 6070 CaCirt      | No significant S.c. match                           |                                                                                     |         |
| CA1685 | 1.0 | 1.0 | 1.0 | IPF12270   | 6878314..6 unknown function orf19.3660             | 12270 IPF6070    | No significant S.c. match                           |                                                                                     |         |
| CA1686 | 1.0 | 1.1 | 1.0 | IPF12272   | complemer unknown function orf19.3659              | 12272 IPF12270   | No significant S.c. match                           |                                                                                     |         |
| CA1687 | 1.0 | 1.1 | 1.0 | IPF12275   | 6880909..6 unknown function orf19.3658             | 12275 IPF12272   | UNCLASSI                                            | molecular_function                                                                  | unknown |
| CA1688 | 1.0 | 1.0 | 1.0 | COX15      | complemer cytochrome oxidase as orf19.3656         | 13028 IPF12275   | UNCLASSI                                            | molecular_function                                                                  | unknown |
| CA1689 | 0.9 | 0.9 | 1.0 | IPF13030   | 6884979..6 unknown function orf19.3655             | 13030 CaCOX15    | ENERGY                                              | " molecular_function                                                                | unknown |
| CA1690 | 1.0 | 0.9 | 1.0 | FAT1       | 6888232..6 very long-chain fatty ac orf19.3653     | 13033 IPF13030   | No significant S.c. match                           |                                                                                     |         |
| CA1691 | 3.9 | 2.4 | 2.7 | PGK1       | complemer Phosphoglycerate kina orf19.3651         | 17009 CaFAT1     | Lipid fatty- $\epsilon$                             | ligase activity,transporter activity                                                |         |
| CA1692 | 1.0 | 1.1 | 1.1 | IPF17055.3 | 6893728..6 unknown function, 3-pr orf19.5036       | 17055 CaPGK1     | C-compou                                            | transferase activity                                                                |         |
| CA1693 | 1.0 | 0.9 | 1.0 | IPF17054   | complemer unknown function orf19.5037              | 17054 IPF17055.3 | UNCLASSI                                            | transporter activity                                                                |         |
| CA1694 | 1.1 | 1.1 | 1.0 | TRM3       | 6897030..6 2'-O-ribose methyltran orf19.5038       | 12305 IPF17054   | No significant S.c. match                           |                                                                                     |         |
| CA1695 | 0.9 | 0.9 | 0.9 | RRP42      | complemer rRNA processing prote orf19.5039         | 12306 CaTRM3     | TRANSCR                                             | transferase activity                                                                |         |
| CA1696 | 1.1 | 1.0 | 0.9 | ASM4       | 6903004..6 similar to Saccharmyc orf19.5040        | 12310 CaRRP42    | TRANSCR                                             | RNA binding                                                                         |         |
| CA1697 | 1.0 | 1.0 | 0.9 | IPF16758   | 6907195..6 unknown function orf19.5043             | 16758 CaASM4     | CELL                                                | CYC structural molecule activity                                                    |         |
| CA1698 | 0.9 | 1.0 | 0.9 | IPF15681   | 6911160..6 unknown function orf19.5045             | 15681 IPF16758   | CELLULAR                                            | TRANSPORT AND TRANSPORT MECHANISMS SUBCELLULAR LOCALISATION                         |         |
| CA1699 | 1.0 | 0.8 | 1.0 | RAM1.3F    | complemer protein farnesyltransferase, beta s      | 19535 IPF15681   | No significant S.c. match                           |                                                                                     |         |
| CA1700 | 1.0 | 1.0 | 1.0 | RAM1.5F    | complemer protein farnesyltransferase orf19.5046   | 19534 CaRAM1.3   | Lipid fatty-acid and isoprenoid metabolism          | """"PROTEIN FATE [folding modification destination] ""CELLULAR COMMUNICATION/SIGNAL |         |
| CA1701 | 1.0 | 1.1 | 1.0 | CFL11      | 6919083..6 Ferric reductase (by hc orf19.701       | 7992 CaRAM1.5    | Lipid fatty- $\epsilon$                             | transferase activity                                                                |         |
| CA1702 | 1.0 | 1.0 | 0.9 | HEL1       | complemer DNA helicase I (by hor orf19.702         | 7990 CaCFL11     | REGULATION OF/INTERACTION WITH CELLULAR ENVIRONMENT | Other virulence attributes                                                          |         |
| CA1703 | 1.1 | 1.0 | 1.0 | IPF7987    | complemer unknown function orf19.703               | 7987 CaHEL1      | CELL                                                | CYC DNA binding,helicase activity,RNA binding                                       |         |
| CA1704 | 1.0 | 1.1 | 1.1 | SOL3       | complemer weak multicopy suppre orf19.704          | 19927 IPF7987    | UNCLASSI                                            | hydrolase activity                                                                  |         |
| CA1705 | 1.1 | 1.1 | 1.0 | GCN5       | complemer Histone acetyltransferase orf19.705      | 7983 CaSOL3      | TRANSCR                                             | molecular_function                                                                  | unknown |
| CA1706 | 1.1 | 1.1 | 0.9 | NMD3       | 6928772..6 RNA binding (by homo orf19.706          | 7981 CaGCN5      | CELL                                                | CYC transferase activity                                                            |         |
| CA1708 | 1.1 | 0.9 | 1.0 | IPF7543    | 6936155..6 unknown function orf19.4888             | 7543 CaNMD3      | TRANSCR                                             | protein binding,RNA binding                                                         |         |
| CA1709 | 0.9 | 0.9 | 0.9 | HOL2       | complemer Multidrug-resistance pr orf19.4889       | 7544 IPF7543     | No significant S.c. match                           |                                                                                     |         |
| CA1710 | 1.0 | 1.0 | 1.0 | CLA4       | complemer protein kinase homolo orf19.4890         | 16297 CaHOL2     | CELL                                                | RES transporter activity                                                            |         |
| CA1711 | 0.9 | 1.0 | 1.0 | POX18      | complemer Lipid-transfer protein (I orf19.1084     | 17142 CaCLA4     | CELL                                                | CYC protein kinase activity                                                         |         |
| CA1712 | 1.0 | 1.1 | 1.0 | ABC1       | 6950284..6 ubiquinol--cytochrome- orf19.1084       | 14939 CaPOX18    | No significant S.c. match                           |                                                                                     |         |
| CA1713 | 1.0 | 1.1 | 1.0 | IPF19743   | 6952488..6 unknown function orf19.3332             | 19743 CaABC1     | ENERGY                                              | " chaperone activity                                                                |         |
| CA1714 | 1.0 | 1.0 | 1.1 | NAB2       | 6955882..6 Nuclear poly(A)-RNA-t orf19.3333        | 14410 IPF19743   | UNCLASSI                                            | molecular_function                                                                  | unknown |
| CA1715 | 0.9 | 1.2 | 1.4 | RPS21      | complemer ribosomal protein (by h orf19.3334       | 14407 CaNAB2     | TRANSCR                                             | RNA binding                                                                         |         |
| CA1716 | 2.1 | 1.3 | 1.1 | IPF17237   | 6959696..6 unknown function orf19.3335             | 17237 CaRPS21    | PROTEIN                                             | :structural molecule activity                                                       |         |
| CA1717 | 1.0 | 0.9 | 1.0 | IPF9315    | complemer putative CCAAT-bindin orf19.4647         | 9315 IPF17237    | No significant S.c. match                           |                                                                                     |         |
| CA1718 | 0.9 | 0.9 | 1.0 | IPF9312    | complemer unknown function orf19.4649              | 9312 IPF9315     | TRANSCRIPTION                                       | SUBCELLULAR LOCALISATION                                                            |         |
| CA1719 | 0.4 | 0.1 | 1.0 | ILV6       | complemer acetolactate synthase, orf19.1211        | 9306 IPF9312     | TRANSCRIPTION                                       | SUBCELLULAR LOCALISATION                                                            |         |
| CA1720 | 1.2 | 1.2 | 1.3 | IPF15581   | complemer unknown function orf19.1212              | 15581 CaILV6     | Amino acid enzyme regulator activity                |                                                                                     |         |
| CA1722 | 1.0 | 1.0 | 1.0 | TEF41      | 6987263..6 Probable translation el orf19.2652      | 16861 IPF15581   | No significant S.c. match                           |                                                                                     |         |
| CA1723 | 0.9 | 0.9 | 1.0 | TEF4       | 6988340..6 translation elongation f orf19.2651     | 16860 CaTEF41    | PROTEIN                                             | SYNTHESIS SUBCELLULAR LOCALISATION                                                  |         |
| CA1724 | 1.0 | 1.0 | 1.0 | MRP10      | complemer Mitochondrial ribosomal protein (b       | 18618 CaTEF4     | PROTEIN                                             | :translation regulator activity                                                     |         |

|        |     |     |     |            |                                          |             |                  |                                                                      |
|--------|-----|-----|-----|------------|------------------------------------------|-------------|------------------|----------------------------------------------------------------------|
| CA1725 | 0.9 | 1.0 | 0.9 | IPF15985   | complemer unknown function               | orf19.2650  | 15985 CaMRP10    | PROTEIN †structural molecule activity                                |
| CA1726 | 1.1 | 1.0 | 1.0 | IPF13021   | complemer unknown function               | orf19.2647  | 13021 IPF15985   | No significant S.c. match                                            |
| CA1727 | 0.9 | 1.0 | 1.0 | IPF8448    | complemer unknown function               | orf19.13844 | 8448 IPF13021    | TRANSCRIPTION SUBCELLULAR LOCALISATION                               |
| CA1728 | 0.9 | 0.8 | 0.9 | WHI3       | complemer Putative RNA binding           | orf19.6494  | 8447 IPF8448     | No significant S.c. match                                            |
| CA1729 | 1.0 | 1.1 | 1.1 | IPF8440    | 7008772..7 similar to Saccharomy         | orf19.6496  | 8440 CaWHI3      | CELL FATE RNA binding                                                |
| CA1730 | 1.0 | 0.9 | 0.9 | IPF8439    | 7009648..7 unknown function              | orf19.6498  | 8439 IPF8440     | CELLULAF molecular_function unknown                                  |
| CA1731 | 1.0 | 1.1 | 1.0 | IPF8437    | complemer putative DNA-directed          | orf19.6499  | 8437 IPF8439     | UNCLASSI molecular_function unknown                                  |
| CA1732 | 0.9 | 1.0 | 1.0 | ECM42      | 7014851..7 Acetylmithine acetyltr        | orf19.6500  | 3933 IPF8437     | CELL CYCLE AND DNA PROCESSING TRANSCRIPTION SUBCELLULAR LOCALISATION |
| CA1733 | 1.0 | 1.0 | 1.0 | IPF3931    | complemer Unknown function               | orf19.1385  | 3931 CaECM42     | Amino acid transferase activity                                      |
| CA1734 | 1.2 | 1.2 | 1.1 | IPF4988    | complemer unknown function               | orf19.2529  | 4988 IPF3931     | UNCLASSIFIED PROTEINS                                                |
| CA1735 | 1.0 | 1.0 | 0.9 | IPF4986    | complemer similar to Saccharomy          | orf19.2528  | 4986 IPF4988     | No significant S.c. match                                            |
| CA1736 | 1.0 | 1.0 | 1.0 | IPF4983    | 7024104..7 unknown function              | orf19.2527  | 4983 IPF4986     | TRANSSCR transcription regulator activity                            |
| CA1737 | 1.3 | 1.3 | 1.1 | LYS12      | complemer homo-isocitrate dehydr         | orf19.2525  | 4979 IPF4983     | UNCLASSI molecular_function unknown                                  |
| CA1738 | 0.8 | 0.9 | 0.6 | MGE1       | complemer heat shock protein (by         | orf19.2524  | 4977 CaLYS12     | Amino acid oxidoreductase activity                                   |
| CA1739 | 1.0 | 1.0 | 1.0 | IPF4976    | complemer unknown function               | orf19.1005  | 4976 CaMGE1      | PROTEIN †chaperone activity                                          |
| CA1740 | 0.9 | 1.1 | 0.8 | SMI1       | 7034065..7 beta-1,3-glucan synthe        | orf19.5058  | 12215 IPF4976    | No significant S.c. match                                            |
| CA1741 | 1.1 | 1.0 | 1.0 | IPF12213   | complemer unknown function               | orf19.5057  | 12213 CaSMI1     | C-compour molecular_function unknown                                 |
| CA1742 | 1.0 | 1.0 | 0.9 | IPF12210   | complemer quinolinate phosphorib         | orf19.5054  | 12210 IPF12213   | No significant S.c. match                                            |
| CA1743 | 1.0 | 0.8 | 0.9 | IPF12209   | 7040457..7 similar to Saccharomy         | orf19.5053  | 12209 IPF12210   | Metabolisr transferase activity                                      |
| CA1744 | 0.9 | 0.9 | 0.9 | IPF10889   | complemer unknown function               | orf19.5052  | 10889 IPF12209   | CELL CYC transferase activity                                        |
| CA1745 | 1.0 | 0.9 | 1.0 | IPF10888   | 7042767..7 unknown function              | orf19.5051  | 10888 IPF10889   | TRANSPO transporter activity                                         |
| CA1746 | 1.0 | 1.0 | 1.0 | IPF10886   | complemer unknown function               | orf19.5050  | 10886 IPF10888   | No significant S.c. match                                            |
| CA1747 | 0.8 | 0.7 | 0.7 | IPF10884   | 7047421..7 unknown function              | orf19.5049  | 10884 IPF10886   | PROTEIN †molecular_function unknown                                  |
| CA1748 | 1.0 | 0.9 | 0.9 | IPF8257    | 7052065..7 unknown function              | orf19.1522  | 8257 IPF10884    | UNCLASSI molecular_function unknown                                  |
| CA1749 | 1.0 | 0.9 | 1.0 | IPF8257.3f | 7055194..7 unknown function, 3-prime end |             | 8253 IPF8257     | No significant S.c. match                                            |
| CA1750 | 1.0 | 0.9 | 0.9 | IPF8252    | complemer unknown function               | orf19.1519  | 8252 IPF8257.3f  | No significant S.c. match                                            |
| CA1751 | 1.1 | 1.0 | 1.1 | ARO3.EXC   | complemer 3-deoxy-D-arabinohep           | orf19.1517  | 8248 IPF8252     | CELL CYCLE AND DNA PROCESSING SUBCELLULAR LOCALISATION               |
| CA1752 | 0.9 | 0.8 | 1.0 | UBP14      | complemer Ubiquitin-specific prote       | orf19.1516  | 8246 CaARO3.e    | Amino acid transferase activity                                      |
| CA1753 | 1.0 | 1.0 | 1.0 | IPF8245    | 7064004..7 putative chitinase            | orf19.1515  | 8245 CaUBP14     | Lipid fatty-ε peptidase activity                                     |
| CA1754 | 1.1 | 1.0 | 1.0 | IPF16320   | 7068168..7 Unknown function              | orf19.5131  | 16320 IPF8245    | C-compour molecular_function unknown                                 |
| CA1755 | 1.1 | 1.2 | 1.2 | PDI1       | complemer protein disulfide-isode        | orf19.5130  | 16217 IPF16320   | UNCLASSI molecular_function unknown                                  |
| CA1756 | 1.0 | 1.0 | 1.0 | IPF14562   | complemer unknown function               | orf19.5129  | 14562 CaPDI1     | Lipid fatty-ε oxidoreductase activity, isomerase activity            |
| CA1757 | 1.0 | 1.1 | 1.1 | IPF14559.ε | 7075780..7 unknown function, 5-pr        | orf19.5128  | 14559 IPF14562   | No significant S.c. match                                            |
| CA1758 | 0.9 | 0.9 | 0.8 | IPF14559.ε | 7076649..7 unknown function, 3-pr        | orf19.5126  | 14556 IPF14559.ε | No significant S.c. match                                            |
| CA1759 | 0.8 | 1.0 | 0.6 | IPF14744   | complemer unknown function               | orf19.5125  | 14744 IPF14559.ε | TRANSSCR RNA binding                                                 |
| CA1760 | 1.0 | 1.0 | 1.0 | IPF17914.ε | complemer unknown function               | orf19.5124  | 17914 IPF14744   | UNCLASSI molecular_function unknown                                  |
| CA1761 | 1.2 | 1.1 | 1.2 | IPF7602    | 7085435..7 oxidoreductase (by ho         | orf19.5193  | 7602 IPF17914.ε  | CONTROL OF CELLULAR ORGANIZATION                                     |
| CA1762 | 1.1 | 1.0 | 1.1 | IPF20014   | 7086420..7 oxidoreductase by homology    |             | 19928 IPF7602    | Lipid fatty-acid and isoprenoid metabolism                           |
| CA1763 | 0.9 | 1.1 | 1.0 | URA6       | 7087454..7 Uridine-monophosphat          | orf19.5195  | 7599 IPF20014    | Lipid fatty-ε molecular_function unknown                             |
| CA1764 | 1.0 | 1.0 | 1.0 | IPF7596    | 7088486..7 similar to Saccharomy         | orf19.5196  | 7596 CaURA6      | Nucleotide transferase activity                                      |
| CA1765 | 1.0 | 1.2 | 1.0 | APE2       | 7089585..7 aminopeptidase yscII          | orf19.5197  | 7593 IPF7596     | TRANSSCR isomerase activity                                          |
| CA1766 | 0.9 | 0.9 | 0.9 | NOP4       | 7092793..7 Nucleolar protein             | orf19.5198  | 7589 CaAPE2      | Amino acid peptidase activity                                        |
| CA1767 | 0.9 | 1.0 | 1.0 | SIT4       | complemer Ser/thr protein phosph         | orf19.5200  | 7586 CaNOP4      | TRANSSCR RNA binding                                                 |
| CA1768 | 0.9 | 0.9 | 1.0 | IPF7585    | 7096998..7 unknown function              | orf19.5201  | 7585 CaSIT4      | CELL CYC protein phosphatase activity                                |
| CA1769 | 0.9 | 1.1 | 1.0 | IPF7581    | 7099629..7 unknown function              | orf19.5203  | 19744 IPF7585    | PROTEIN †structural molecule activity                                |
| CA1770 | 1.0 | 1.0 | 0.9 | IPF12457   | 7104740..7 unknown function              | orf19.2185  | 12457 IPF7581    | No significant S.c. match                                            |
| CA1771 | 0.9 | 0.9 | 0.9 | SEH1       | complemer nuclear pore protein (b        | orf19.2186  | 12458 IPF12457   | UNCLASSI molecular_function unknown                                  |
| CA1772 | 0.9 | 0.8 | 1.1 | ALG7       | 7107522..7 UDP-N-acetylglucosan          | orf19.2187  | 12460 CaSEH1     | CELLULAF structural molecule activity                                |
| CA1773 | 0.9 | 1.0 | 1.0 | VRP1       | 7109211..7 verprolin (by homology        | orf19.2190  | 12461 CaALG7     | Phosphate transferase activity                                       |
| CA1774 | 1.0 | 1.1 | 1.1 | IPF7498    | complemer unknown function               | orf19.2191  | 7498 CaVRP1      | CELLULAF protein binding                                             |
| CA1775 | 0.2 | 0.6 | 0.2 | GDH2       | complemer NAD-specific glutamat          | orf19.9738  | 19745 IPF7498    | UNCLASSI molecular_function unknown                                  |
| CA1776 | 0.9 | 1.0 | 1.0 | IPF14704   | complemer unknown function               | orf19.1823  | 14704 CaGDH2     | Amino acid oxidoreductase activity                                   |
| CA1777 | 1.1 | 1.1 | 1.1 | IPF14706   | complemer unknown function               | orf19.1824  | 14706 IPF14704   | UNCLASSIFIED PROTEINS                                                |
| CA1778 | 1.0 | 0.9 | 1.1 | IPF13810.ε | complemer unknown function, 3-pr         | orf19.1825  | 13810 IPF14706   | No significant S.c. match                                            |
| CA1779 | 1.0 | 0.9 | 0.9 | IPF14510   | 7131977..7 unknown function              | orf19.1826  | 14510 IPF13810.ε | No significant S.c. match                                            |
| CA1780 | 1.0 | 0.9 | 1.1 | IPF14509   | 7134782..7 unknown function              | orf19.1827  | 14509 IPF14510   | UNCLASSI molecular_function unknown                                  |
| CA1781 | 1.0 | 0.9 | 1.0 | IPF14508   | complemer unknown function               | orf19.1828  | 14508 IPF14509   | UNCLASSIFIED PROTEINS                                                |
| CA1782 | 0.7 | 1.1 | 0.4 | PHO84.3E1  | 7138851..7 Inorganic phosphate tr        | orf19.1172  | 7638 IPF14508    | UNCLASSI molecular_function unknown                                  |
| CA1783 | 1.1 | 1.1 | 1.1 | IPF7635    | complemer unknown function               | orf19.1171  | 7635 CaPHO84.    | Phosphate transporter activity                                       |
| CA1784 | 1.0 | 0.9 | 1.0 | ARO7       | complemer chorismate mutase (by          | orf19.1170  | 7632 IPF7635     | No significant S.c. match                                            |
| CA1785 | 1.0 | 1.0 | 0.9 | IPF7631    | complemer unknown function               | orf19.1169  | 7631 CaARO7      | Amino acid isomerase activity                                        |
| CA1786 | 1.4 | 1.1 | 1.2 | IPF7629    | complemer unknown function               | orf19.1168  | 7629 IPF7631     | UNCLASSI molecular_function unknown                                  |
| CA1787 | 0.4 | 0.1 | 0.9 | IFH3       | complemer Dioxxygenase (by homc          | orf19.1167  | 19929 IPF7629    | No significant S.c. match                                            |
| CA1788 | 1.0 | 0.9 | 1.0 | USO1.3     | complemer Cytoskeletal-related tr        | orf19.1166  | 7623 CaIFH3      | CELL RES oxidoreductase activity                                     |
| CA1789 | 1.0 | 1.3 | 1.0 | GAR1       | 7154269..7 Nucleolar rRNA proces         | orf19.1164  | 7621 CaUSO1.3    | UNCLASSI molecular_function unknown                                  |
| CA1790 | 1.2 | 1.1 | 1.1 | IPF13971   | 7156384..7 unknown function              | orf19.5204  | 13971 CaGAR1     | TRANSSCR RNA binding                                                 |
| CA1791 | 1.0 | 1.0 | 0.9 | IPF13967   | 7158856..7 unknown function              | orf19.5205  | 13967 IPF13971   | UNCLASSI molecular_function unknown                                  |
| CA1792 | 1.1 | 1.1 | 1.0 | IPF13966   | complemer unknown function               | orf19.5206  | 13966 IPF13967   | UNCLASSIFIED PROTEINS                                                |
| CA1793 | 1.0 | 1.0 | 0.9 | IPF18608.ε | 7162049..7 unknown function, 5-pr        | orf19.5207  | 18608 IPF13966   | UNCLASSI molecular_function unknown                                  |
| CA1794 | 1.0 | 1.0 | 0.9 | IPF18608.ε | 7162608..7 unknown function, 3-pr        | orf19.5208  | 11262 IPF18608.ε | CLASSIFICATION NOT YET CLEAR-CUT                                     |
| CA1795 | 1.0 | 1.0 | 1.0 | IPF11261   | complemer unknown function               | orf19.5209  | 11261 IPF18608.ε | CLASSIFIC molecular_function unknown                                 |
| CA1796 | 1.0 | 0.9 | 1.1 | IPF11259   | complemer unknown function               | orf19.5210  | 11259 IPF11261   | UNCLASSI molecular_function unknown                                  |



|        |     |     |     |            |                                                |       |            |                                                                                                         |
|--------|-----|-----|-----|------------|------------------------------------------------|-------|------------|---------------------------------------------------------------------------------------------------------|
| CA1797 | 1.3 | 1.3 | 1.2 | NUM12      | 7171839..7 nuclear migration proteorf19.2924   | 15988 | IPF11259   | TRANSCR DNA binding,transcription regulator activity                                                    |
| CA1798 | 1.1 | 1.0 | 1.1 | IPF11448   | complemer unknown function orf19.2923          | 11448 | CaNUM12    | CELL CYCLE AND DNA PROCESSING                                                                           |
| CA1799 | 1.0 | 1.0 | 1.0 | IPF11446   | complemer unknown function orf19.2922          | 11446 | IPF11448   | UNCLASSIFIED PROTEINS                                                                                   |
| CA1800 | 1.0 | 1.0 | 1.0 | IPF11445   | 7179826..7 similar to Saccharomyorf19.2921     | 11445 | IPF11446   | No significant S.c. match                                                                               |
| CA1801 | 1.1 | 0.9 | 1.0 | IPF11444   | complemer unknown function orf19.2920          | 11444 | IPF11445   | CELL CYC chaperone activity                                                                             |
| CA1802 | 1.0 | 1.0 | 1.0 | IPF11443   | complemer unknown function orf19.2919          | 11443 | IPF11444   | UNCLASSIRNA binding                                                                                     |
| CA1803 | 0.8 | 0.9 | 0.9 | IPF16748   | complemer unknown function orf19.2917          | 16748 | IPF11443   | CELL CYC RNA binding,helicase activity                                                                  |
| CA1804 | 0.9 | 0.9 | 1.0 | TAF17      | 7190946..7 TFIID and SAGA subu orf19.1111      | 6333  | IPF16748   | CELLULAFmolecular_function unknown                                                                      |
| CA1805 | 1.0 | 1.1 | 1.1 | IPF6332    | 7191994..7 similar to Saccharomyorf19.1112     | 6332  | CaTAF17    | TRANSCR transcription regulator activity                                                                |
| CA1806 | 1.0 | 1.0 | 0.9 | IPF6329    | 7194761..7 unknown function orf19.1113         | 6329  | IPF6332    | C-compour molecular_function unknown                                                                    |
| CA1807 | 1.2 | 1.0 | 1.1 | IPF6328    | complemer unknown function orf19.1114          | 6328  | IPF6329    | No significant S.c. match                                                                               |
| CA1808 | 0.9 | 0.8 | 1.0 | GUK1       | complemer Guanylate kinase (by † orf19.1115    | 6326  | IPF6328    | UNCLASSImolecular_function unknown                                                                      |
| CA1809 | 1.0 | 1.1 | 1.0 | IPF6325    | 7198001..7 unknown function orf19.1116         | 6325  | CaGUK1     | Nucleotide transferase activity                                                                         |
| CA1810 | 1.0 | 1.1 | 1.0 | FDH2       | 7199805..7 Formate dehydrogena:orf19.1117      | 6323  | IPF6325    | No significant S.c. match                                                                               |
| CA1811 | 1.0 | 1.1 | 1.0 | MTR10      | 7201350..7 Involved in nuclear proorf19.1119   | 6321  | CaFDH2     | ENERGY                                                                                                  |
| CA1812 | 1.0 | 1.1 | 0.9 | IPF13879   | complemer unknown function orf19.1120          | 13879 | CaMTR10    | TRANSCRIPTION CELLULAR TRANSPORT AND TRANSPORT MECHANISMS SUBCELLULAR LOCALISATION                      |
| CA1814 | 0.9 | 0.9 | 0.9 | TRA1.5EO   | complemer ATM/Mec1/TOR1+2-reorf19.139          | 14787 | IPF13879   | No significant S.c. match                                                                               |
| CA1815 | 1.1 | 1.0 | 1.2 | IPF18606   | complemer unknown function orf19.138           | 18606 | CaTRA1.5€  | TRANSCRIPTION                                                                                           |
| CA1816 | 1.0 | 1.0 | 1.1 | IPF7020    | 7219916..7 unknown function orf19.136          | 7020  | IPF18606   | CELL FATImolecular_function unknown                                                                     |
| CA1817 | 1.0 | 1.1 | 1.0 | IPF7021    | complemer similar to Saccharomyorf19.135       | 7021  | IPF7020    | CELL RES molecular_function unknown                                                                     |
| CA1818 | 1.1 | 1.0 | 1.1 | IPF7023.3  | complemer unknown function, 3-prorf19.134      | 7023  | IPF7021    | CELLULAFmolecular_function unknown                                                                      |
| CA1819 | 1.0 | 0.9 | 0.9 | IPF16549   | 7233471..7 Unknown function orf19.4273         | 16549 | IPF7023.3  | No significant S.c. match                                                                               |
| CA1820 | 0.9 | 1.0 | 1.0 | IPF9529    | complemer probable mannosyltranorf19.4270      | 9529  | IPF16549   | TRANSCR molecular_function unknown                                                                      |
| CA1821 | 0.5 | 0.4 | 0.8 | IPF9527    | 7240345..7 unknown function orf19.4269         | 9527  | IPF9529    | C-compound and carbohydrate metabolism ""PROTEIN FATE [folding modification destination] ""             |
| CA1822 | 0.9 | 0.8 | 1.0 | IPF9525    | 7242308..7 unknown function orf19.4268         | 9525  | IPF9527    | UNCLASSIFIED PROTEINS                                                                                   |
| CA1823 | 1.1 | 0.9 | 0.9 | IPF9522.5f | 7244770..7 septin, 5-prime end (by orf19.4267  | 9524  | IPF9525    | UNCLASSIRNA binding                                                                                     |
| CA1825 | 1.0 | 0.9 | 1.0 | IPF9522.3f | 7245596..7 septin, 3-prime end (by orf19.4266  | 9522  | IPF9522.5f | C-compound and carbohydrate metabolism CELL CYCLE AND DNA PROCESSING CELL FATE SUBCELLULAR LOCALISATION |
| CA1826 | 1.0 | 1.0 | 1.0 | UAP1       | complemer UDP-N-acetylglucosan orf19.4265      | 9521  | IPF9522.3f | CELL CYCLE AND DNA PROCESSING CELL FATE SUBCELLULAR LOCALISATION                                        |
| CA1827 | 1.1 | 0.9 | 1.2 | IPF9520    | complemer unknown function orf19.1174          | 9520  | CaUAP1     | CONTROL nucleotidyltransferase activity                                                                 |
| CA1828 | 1.2 | 0.9 | 1.1 | CDC22.3E   | 7252360..7 DNA Polymerase III, 3-prime end     | 17179 | IPF9520    | No significant S.c. match                                                                               |
| CA1829 | 1.0 | 1.1 | 1.0 | IPF17177.€ | complemer similar to Saccharomyorf19.5184      | 17178 | CaCDC22.   | CELL CYCLE AND DNA PROCESSING SUBCELLULAR LOCALISATION                                                  |
| CA1830 | 1.0 | 1.2 | 1.0 | IPF17177.€ | complemer similar to Saccharomyorf19.5185      | 17177 | IPF17177.€ | TRANSCR signal transducer activity                                                                      |
| CA1831 | 1.0 | 1.0 | 1.0 | CHS1       | complemer Chitin synthase (by hc orf19.5188    | 6129  | IPF17177.€ | TRANSCRIPTION CELLULAR TRANSPORT AND TRANSPORT MECHANISMS CELL FATE SUBCELLULAR LOCALISATION            |
| CA1832 | 1.2 | 1.0 | 1.0 | IPF17727   | complemer unknown function orf19.5190          | 17727 | CaCHS1     | C-compour transferase activity                                                                          |
| CA1834 | 1.4 | 2.2 | 1.0 | PFK1       | complemer 6-phosphofructokinase orf19.3967     | 5769  | IPF17727   | CELL CYCLE AND DNA PROCESSING CELLULAR TRANSPORT AND TRANSPORT MECHANISMS CELL FATE SUBCELLULAR LOC/    |
| CA1835 | 0.9 | 1.0 | 1.0 | CRH12      | complemer Cell wall protein (by ho orf19.3966  | 5772  | CaPFK1     | C-compour transferase activity                                                                          |
| CA1836 | 1.0 | 0.9 | 1.0 | IPF5773    | 7279135..7 unknown function orf19.3965         | 5773  | CaCRH12    | SUBCELLULAR LOCALISATION                                                                                |
| CA1837 | 1.0 | 1.0 | 1.0 | IPF5776    | complemer ash2-trithorax family prorf19.3964   | 5776  | IPF5773    | No significant S.c. match                                                                               |
| CA1838 | 1.0 | 1.0 | 1.0 | IPF5777    | complemer unknown function orf19.3963          | 5777  | IPF5776    | UNCLASSItranscription regulator activity                                                                |
| CA1839 | 0.9 | 1.0 | 0.8 | IPF4435    | 7284774..7 unknown function orf19.4711         | 4435  | IPF5777    | UNCLASSImolecular_function unknown                                                                      |
| CA1840 | 0.9 | 0.9 | 0.9 | IPF3       | complemer Unknown Function orf19.4707          | 4440  | IPF4435    | UNCLASSImolecular_function unknown                                                                      |
| CA1841 | 1.0 | 1.0 | 1.0 | CCA1       | 7291739..7 tRNA nucleotidyltransf orf19.4705   | 4444  | CaIPF3     | No significant S.c. match                                                                               |
| CA1842 | 0.9 | 1.1 | 1.0 | ARO1       | 7293668..7 arom pentafunctional € orf19.4704   | 4446  | CaCCA1     | TRANSCR nucleotidyltransferase activity                                                                 |
| CA1843 | 0.9 | 0.9 | 1.0 | IPF11364   | complemer unknown function orf19.635           | 11384 | CaARO1     | Amino acid transferase activity                                                                         |
| CA1844 | 1.0 | 1.0 | 1.1 | IFL5.3     | complemer unknown function, 3-prorf19.654      | 19930 | IPF11364   | No significant S.c. match                                                                               |
| CA1845 | 0.9 | 0.7 | 0.9 | IPF11123   | 7311134..7 similar to Saccharomyorf19.637      | 11123 | CaIFL5.3   | CELL RESCUE DEFENSE AND VIRULENCE ""CELL FATE                                                           |
| CA1846 | 1.0 | 1.2 | 0.6 | FDH12      | 7313358..7 Formate dehydrogena:orf19.638       | 11124 | IPF11123   | ENERGY € oxidoreductase activity                                                                        |
| CA1847 | 0.9 | 1.0 | 0.9 | IPF11127   | 7314688..7 unknown function orf19.639          | 11127 | CaFDH12    | ENERGY oxidoreductase activity                                                                          |
| CA1848 | 1.1 | 0.9 | 0.9 | IPF11128   | complemer unknown function                     | 11128 | IPF11127   | UNCLASSIFIED PROTEINS                                                                                   |
| CA1849 | 1.0 | 1.1 | 1.0 | IPF19932   | complemer unknown function orf19.640           | 19932 | IPF11128   | PROTEIN †structural molecule activity                                                                   |
| CA1850 | 1.0 | 1.0 | 1.0 | IPF14630   | 7317320..7 unknown function orf19.641          | 14630 | IPF19932   | UNCLASSIFIED PROTEINS                                                                                   |
| CA1851 | 0.6 | 0.6 | 0.5 | SAP155     | complemer Cell cycle protein, interorf19.642   | 14629 | IPF14630   | PROTEIN Imolecular_function unknown                                                                     |
| CA1852 | 1.0 | 1.1 | 1.0 | IPF13885.f | 7322082..7 unknown function, 5-prime end       | 14628 | CaSAP155.r | CELL CYCLE AND DNA PROCESSING CELL FATE                                                                 |
| CA1853 | 0.9 | 1.0 | 1.0 | LYP1       | 7325015..7 lysine-specific high-affi orf19.651 | 16499 | IPF13885.r | No significant S.c. match                                                                               |
| CA1854 | 1.0 | 1.1 | 0.9 | IPF12611   | 7327934..7 unknown function orf19.649          | 12611 | CaLYP1     | Amino acid metabolism CELLULAR TRANSPORT AND TRANSPORT MECHANISMS SUBCELLULAR LOCALISATION TRANSPORT FA |
| CA1855 | 0.4 | 0.6 | 0.4 | GLN1       | 7336170..7 glutamate-ammonia ligorf19.646      | 15149 | IPF12611   | UNCLASSImolecular_function unknown                                                                      |
| CA1856 | 1.0 | 1.0 | 1.0 | IPF13689   | 7343526..7 unknown function orf19.9081         | 13689 | CaGLN1     | Amino acid ligase activity                                                                              |
| CA1857 | 1.0 | 1.0 | 1.1 | IPF15348   | 7345494..7 unknown function orf19.9080         | 15348 | IPF13689   | No significant S.c. match                                                                               |
| CA1858 | 1.0 | 1.0 | 1.0 | IPF15344   | 7349681..7 unknown function orf19.9076         | 15344 | IPF15348   | UNCLASSIFIED PROTEINS                                                                                   |
| CA1859 | 1.0 | 1.0 | 1.0 | IPF19614   | 7358890..7 putative transcription f:orf19.9073 | 19614 | IPF15344   | UNCLASSIFIED PROTEINS                                                                                   |
| CA1860 | 1.0 | 1.0 | 0.9 | UTR4       | 7361856..7 unknown function orf19.9072         | 16638 | IPF19614   | TRANSCRIPTION                                                                                           |
| CA1861 | 1.0 | 1.0 | 0.9 | RAD32      | 7364965..7 DNA repair protein (by orf19.866    | 15212 | CaUTR4     | Amino acid molecular_function unknown                                                                   |
| CA1862 | 1.0 | 1.0 | 0.9 | NMD2       | complemer Nonsense-mediated m orf19.864        | 7641  | CaRAD32    | CELL CYC nucleotidyltransferase m activity                                                              |
| CA1863 | 1.0 | 1.1 | 1.0 | MRPL35     | complemer Ribosomal protein of t orf19.863     | 7643  | CaNMD2     | Nucleotide protein binding                                                                              |
| CA1864 | 1.0 | 0.7 | 1.0 | IPF7644    | complemer unknown function orf19.862           | 7644  | CaMRPL3€   | PROTEIN †structural molecule activity                                                                   |
| CA1865 | 0.9 | 0.8 | 0.8 | IPF7646    | complemer putative transcription f:orf19.861   | 7646  | IPF7644    | No significant S.c. match                                                                               |
| CA1866 | 0.9 | 0.8 | 0.9 | IPF7647    | 7374630..7 unknown function orf19.860          | 7647  | IPF7646    | TRANSCRIPTION SUBCELLULAR LOCALISATION                                                                  |
| CA1868 | 1.1 | 1.1 | 1.0 | IPF14501.€ | 7380194..7 putative G-protein, -tra orf19.9992 | 18597 | IPF7647    | No significant S.c. match                                                                               |
| CA1869 | 0.8 | 0.8 | 0.9 | IPF15822   | complemer unknown function orf19.9993          | 15822 | IPF14501.€ | UNCLASSImolecular_function unknown                                                                      |
| CA1870 | 0.9 | 1.0 | 0.9 | IPF16981.€ | complemer unknown function, exo orf19.9994     | 16981 | IPF15822   | No significant S.c. match                                                                               |
| CA1871 | 0.9 | 1.0 | 0.9 | IPF16981.f | complemer unknown function, exo orf19.9995     | 18595 | IPF16981.€ | UNCLASSIFIED PROTEINS                                                                                   |
| CA1872 | 1.1 | 1.2 | 1.1 | IPF6700    | complemer unknown function orf19.2459          | 6700  | IPF16981.€ | UNCLASSImolecular_function unknown                                                                      |

|        |     |     |     |            |                                              |             |       |            |                                                                                                                 |
|--------|-----|-----|-----|------------|----------------------------------------------|-------------|-------|------------|-----------------------------------------------------------------------------------------------------------------|
| CA1873 | 1.0 | 1.0 | 1.0 | IPF6696    | complemer unknown function                   | orf19.9997  | 6696  | IPF6700    | No significant S.c. match                                                                                       |
| CA1874 | 1.0 | 1.2 | 1.1 | TPK2       | 7401744..7 cAMP-dependent proteor            | orf19.2277  | 10304 | IPF6696    | No significant S.c. match                                                                                       |
| CA1875 | 1.0 | 1.1 | 0.9 | RPB9       | complemer DNA-directed RNA pol               | orf19.2276  | 10302 | CaTPK2     | TRANSCR protein kinase activity                                                                                 |
| CA1876 | 1.0 | 1.0 | 1.0 | IPF10301   | 7404401..7 putative 60S ribosoma             | orf19.2275  | 10301 | CaRPB9     | TRANSCR nucleotidyltransferase activity                                                                         |
| CA1877 | 1.1 | 1.1 | 1.0 | IPF10300   | complemer unknown function                   | orf19.2274  | 10300 | IPF10301   | PROTEIN :molecular_function unknown                                                                             |
| CA1878 | 1.0 | 1.0 | 1.0 | IPF10298   | 7407778..7 unknown function                  | orf19.2272  | 10298 | IPF10300   | No significant S.c. match                                                                                       |
| CA1879 | 1.1 | 1.2 | 1.2 | SMF12      | complemer manganese transporte               | orf19.2270  | 19747 | IPF10298   | UNCLASSItranscription regulator activity                                                                        |
| CA1880 | 1.0 | 1.0 | 1.0 | IPF13316   | complemer unknown function                   | orf19.2269  | 13316 | CaSMF12    | PROTEIN Itransporter activity                                                                                   |
| CA1881 | 1.0 | 1.0 | 0.9 | RCK2       | 7416783..7 Ca/calmodulin-depend              | orf19.9808  | 19933 | IPF13316   | UNCLASSImolecular_function unknown                                                                              |
| CA1882 | 1.2 | 0.9 | 1.1 | IPF19934   | complemer unknown function                   | orf19.9755  | 19934 | CaRCK2     | ENERGY Cprotein kinase activity                                                                                 |
| CA1883 | 1.2 | 1.3 | 1.1 | IPF5479    | 7424011..7 unknown function                  | orf19.2209  | 5479  | IPF19934   | No significant S.c. match                                                                                       |
| CA1884 | 1.0 | 1.1 | 1.0 | IPF5486    | 7427257..7 unknown function                  | orf19.2208  | 5486  | IPF5479    | UNCLASSIFIED PROTEINS                                                                                           |
| CA1886 | 1.1 | 1.1 | 1.0 | RHO2.3F    | 7432655..7 GTP-binding protein of the RHO si |             | 5490  | IPF5486    | No significant S.c. match                                                                                       |
| CA1887 | 1.1 | 1.0 | 1.0 | IPF5496    | 7434209..7 unknown function                  | orf19.2204  | 5496  | CaRHO2.3   | C-compound and carbohydrate metabolism CELLULAR COMMUNICATION/SIGNAL TRANSDUCTION MECHANISM CELL FATE SUBCE     |
| CA1888 | 1.1 | 0.9 | 1.1 | IPF18594   | complemer unknown function                   | orf19.9748  | 18594 | IPF5496    | UNCLASSImolecular_function unknown                                                                              |
| CA1889 | 1.0 | 1.0 | 1.1 | CBP6       | 7437555..7 Apo-cytochrome B pre-mRNA proc    |             | 18593 | IPF18594   | C-compound and carbohydrate metabolism ENERGY                                                                   |
| CA1891 | 0.3 | 0.4 | 0.2 | IPF10196   | 7443681..7 unknown function                  | orf19.2752  | 10196 | CaCBP6     | TRANSCR molecular_function unknown                                                                              |
| CA1892 | 0.9 | 0.9 | 0.9 | IPF10197   | complemer Similarity to transcripti          | orf19.2753  | 10197 | IPF10196   | C-compour DNA binding,transcription regulator activity                                                          |
| CA1893 | 0.9 | 0.9 | 0.9 | TIM13      | 7452428..7 subunit of mitochondri            | orf19.2754  | 10200 | IPF10197   | TRANSCRIPTION                                                                                                   |
| CA1894 | 1.1 | 1.1 | 1.0 | PRE7.EXO   | 7453387..7 putative subunit of 20S           | orf19.2755  | 10202 | CaTIM13    | PROTEIN Itransporter activity                                                                                   |
| CA1895 | 1.0 | 1.0 | 1.0 | PRE7.EXO   | 7453894..7 subunit of 20S proteasome, exon 1 |             | 12004 | CaPRE7.e   | PROTEIN Ipeptidase activity                                                                                     |
| CA1896 | 1.0 | 1.0 | 1.0 | ERD2       | complemer ER lumen protein retai             | orf19.2756  | 12003 | CaPRE7.e   | PROTEIN FATE [folding modification destination] ""SUBCELLULAR LOCALISATION                                      |
| CA1897 | 1.0 | 1.0 | 1.0 | IPF12002   | complemer unknown function                   | orf19.1027  | 12002 | CaERD2     | PROTEIN FATE [folding modification destination] ""CELLULAR TRANSPORT AND TRANSPORT MECHANISMS SUBCELLULAR LOCAL |
| CA1898 | 1.0 | 1.0 | 1.0 | IPF11998   | 7457401..7 unknown function                  | orf19.1027  | 11998 | IPF12002   | CELL CYCLE AND DNA PROCESSING SUBCELLULAR LOCALISATION                                                          |
| CA1899 | 1.0 | 1.1 | 0.9 | HDA1       | 7461699..7 Histone deacetylase (t            | orf19.2606  | 15480 | IPF11998   | No significant S.c. match                                                                                       |
| CA1900 | 0.9 | 1.0 | 0.9 | ARK1       | complemer actin regulating serine/           | orf19.2605  | 14133 | CaHDA1     | CELL CYC hydrolase activity                                                                                     |
| CA1901 | 0.8 | 0.7 | 0.8 | IPF14135   | 7467022..7 unknown function                  | orf19.2604  | 14135 | CaARK1     | CELL CYCLE AND DNA PROCESSING SUBCELLULAR LOCALISATION                                                          |
| CA1902 | 0.9 | 0.8 | 0.9 | OPT1       | 7470380..7 oligopeptide transporte           | orf19.2602  | 14139 | IPF14135   | UNCLASSImolecular_function unknown                                                                              |
| CA1903 | 0.7 | 0.4 | 1.0 | IPF2754    | complemer unknown function                   |             | 2754  | CaOPT1     | CELL FATItransporter activity                                                                                   |
| CA1904 | 1.0 | 1.0 | 1.0 | GRX5       | complemer Glutaredoxin                       | orf19.1029i | 7275  | IPF2754    | No significant S.c. match                                                                                       |
| CA1905 | 1.0 | 1.0 | 1.0 | IPF7274    | 7478916..7 unknown function                  | orf19.2783  | 7274  | CaGRX5     | PROTEIN Ioxidoreductase activity                                                                                |
| CA1906 | 0.9 | 0.9 | 1.0 | IPF7271    | 7480500..7 unknown function                  | orf19.2784  | 7271  | IPF7274    | CELL RESCUE DEFENSE AND VIRULENCE ""SUBCELLULAR LOCALISATION                                                    |
| CA1907 | 1.6 | 1.8 | 1.2 | ATP7       | complemer F1F0-ATPase complex                | orf19.2785  | 7270  | IPF7271    | No significant S.c. match                                                                                       |
| CA1908 | 1.0 | 1.0 | 1.0 | APL3       | 7482636..7 AP-2 complex subunit,             | orf19.2786  | 7268  | CaATP7     | ENERGY Cstructural molecule activity                                                                            |
| CA1909 | 1.0 | 0.9 | 1.0 | IPF20091   | 7487008..7 unknown function                  | orf19.1030i | 20091 | CaAPL3     | PROTEIN Imolecular_function unknown                                                                             |
| CA1910 | 1.0 | 1.1 | 1.0 | IPF7260    | complemer unknown function                   | orf19.1030i | 7260  | IPF20091   | CELL FATE                                                                                                       |
| CA1911 | 1.1 | 1.4 | 0.9 | SSE1       | 7500200..7 heat shock protein of l           | orf19.2435  | 13776 | IPF7260    | UNCLASSItransferase activity                                                                                    |
| CA1912 | 1.1 | 1.1 | 1.1 | SKY1       | 7503972..7 SRPK1 like protein kin            | orf19.2436  | 13772 | CaSSE1     | CELL RES chaperone activity                                                                                     |
| CA1913 | 1.0 | 1.0 | 1.0 | ARC35      | 7506384..7 subunit of the Arp2/3 c           | orf19.2437  | 16563 | CaSKY1     | UNCLASSIprotein kinase activity                                                                                 |
| CA1914 | 1.0 | 0.9 | 1.0 | IPF16564   | complemer putative mitochondrial             | orf19.2438  | 16564 | CaARC35    | CELLULAFstructural molecule activity                                                                            |
| CA1915 | 0.9 | 1.0 | 1.0 | IPF16565   | 7508297..7 unknown function                  | orf19.2439  | 16565 | IPF16564   | PROTEIN :molecular_function unknown                                                                             |
| CA1916 | 1.0 | 0.9 | 1.0 | IPF16566.1 | 7509360..7 unknown function, 3-prime end     |             | 16566 | IPF16565   | Lipid fatty-acid and isoprenoid metabolism ""SUBCELLULAR LOCALISATION TRANSPORT FACILITATION                    |
| CA1917 | 1.1 | 1.1 | 1.0 | IPF7479.3f | complemer unknown function, 3-pr             | orf19.2440  | 7479  | IPF16566.1 | No signific transporter activity,oxidoreductase activity                                                        |
| CA1918 | 1.0 | 0.9 | 1.0 | IPF7479.5f | complemer unknown function, 5-pr             | orf19.2441  | 7478  | IPF7479.3f | UNCLASSIFIED PROTEINS                                                                                           |
| CA1919 | 0.9 | 0.9 | 1.1 | IPF7477    | 7512539..7 unknown function                  | orf19.2442  | 7477  | IPF7479.5f | No significant S.c. match                                                                                       |
| CA1920 | 1.1 | 1.0 | 1.1 | IPF7476    | complemer similar to Saccharomy              | orf19.2443  | 7476  | IPF7477    | No significant S.c. match                                                                                       |
| CA1921 | 1.0 | 1.0 | 1.5 | IPF7475    | complemer similar to Saccharomy              | orf19.2444  | 7475  | IPF7476    | CELLULAFenzyme regulator activity                                                                               |
| CA1922 | 1.1 | 1.0 | 1.1 | DIP52      | complemer Dicarboxylic amino aci             | orf19.2445  | 7474  | IPF7475    | CELLULAFmolecular_function unknown                                                                              |
| CA1923 | 1.0 | 1.0 | 1.1 | IPF9130    | complemer unknown function                   | orf19.5539  | 9130  | CaDIP52    | Amino acid metabolism SUBCELLULAR LOCALISATION TRANSPORT FACILITATION                                           |
| CA1924 | 1.1 | 1.7 | 1.2 | IPF9126    | 7531935..7 unknown function                  | orf19.5537  | 9126  | IPF9130    | No significant S.c. match                                                                                       |
| CA1925 | 1.2 | 1.2 | 1.2 | IPF18587   | 7540351..7 putative methyltransfer           | orf19.8372  | 18587 | IPF9126    | CELL RES signal transducer activity                                                                             |
| CA1926 | 0.9 | 0.9 | 1.1 | IPF13407   | complemer Unknown function                   | orf19.8373  | 13407 | IPF18587   | CELL CYCLE AND DNA PROCESSING SUBCELLULAR LOCALISATION                                                          |
| CA1927 | 1.0 | 1.1 | 1.0 | YBN5       | complemer Putative purine nucleot            | orf19.754   | 13405 | IPF13407   | C-compound and carbohydrate metabolism ""PROTEIN FATE [folding modification destination] ""                     |
| CA1928 | 1.0 | 0.9 | 0.9 | MRPL37     | 7545977..7 Mitochondrial ribosom             | orf19.755   | 13404 | CaYBN5     | UNCLASSImolecular_function unknown                                                                              |
| CA1929 | 1.0 | 1.0 | 1.0 | SAP7       | complemer secreted aspartyl prote            | orf19.8376  | 19935 | CaMRPL37   | PROTEIN :structural molecule activity                                                                           |
| CA1930 | 1.0 | 1.0 | 1.0 | IPF3906.3  | 7553342..7 unknown function, 3-pr            | orf19.758   | 3906  | CaSAP7     | PROTEIN FATE [folding modification destination] ""Other virulence attributes                                    |
| CA1931 | 1.1 | 1.0 | 1.1 | IPF3905    | complemer similar to Saccharomy              | orf19.759   | 3905  | IPF3906.3  | UNCLASSIsignal transducer activity                                                                              |
| CA1932 | 1.1 | 1.0 | 1.0 | IPF3903    | 7557161..7 unknown function                  | orf19.760   | 3903  | IPF3905    | CELLULAFmolecular_function unknown                                                                              |
| CA1933 | 1.0 | 0.9 | 0.9 | IPF18586   | complemer Unknown function                   | orf19.8381  | 18586 | IPF3903    | PROTEIN :structural molecule activity                                                                           |
| CA1934 | 1.1 | 1.1 | 0.9 | YAP1802.3  | 7561674..7 cytoskeletal adaptor, member of A |             | 8015  | IPF18586   | No significant S.c. match                                                                                       |
| CA1935 | 1.0 | 1.1 | 1.0 | IPF19936   | complemer unknown function                   | orf19.4185  | 19936 | CaYAP180   | PROTEIN FATE [folding modification destination] ""CELLULAR TRANSPORT AND TRANSPORT MECHANISMS SUBCELLULAR LOCAL |
| CA1936 | 1.0 | 0.9 | 1.0 | PCT1       | 7564083..7 cholinephosphate cytic            | orf19.4186  | 8007  | IPF19936   | UNCLASSIprotein phosphatase activity                                                                            |
| CA1937 | 1.0 | 1.0 | 1.0 | MMM1       | 7565694..7 mitochondrial outer me            | orf19.4187  | 8006  | CaPCT1     | Lipid fatty-; nucleotidyltransferase activity                                                                   |
| CA1938 | 0.9 | 1.0 | 1.0 | NMD5       | 7567805..7 putative Nam7p/Upf1p              | orf19.4188  | 8002  | CaMMM1     | SUBCELLLmolecular_function unknown                                                                              |
| CA1939 | 1.0 | 1.0 | 1.0 | IPF8000    | 7572102..7 unknown function                  | orf19.4189  | 8000  | CaNMD5     | Nucleotide protein binding                                                                                      |
| CA1940 | 0.9 | 1.0 | 0.9 | IPF7999    | complemer unknown function                   | orf19.4190  | 7999  | IPF8000    | No significant S.c. match                                                                                       |
| CA1941 | 1.0 | 1.0 | 0.9 | IPF7998    | 7574570..7 Ribosomal protein L24             | orf19.4191  | 7998  | IPF7999    | UNCLASSImolecular_function unknown                                                                              |
| CA1942 | 0.9 | 0.9 | 1.0 | HCT5.3EO   | complemer #N/A                               |             | 7996  | IPF7998    | PROTEIN :molecular_function unknown                                                                             |
| CA1943 |     |     |     | IPF11759   | 7577262..7579019                             |             |       | CaHCT5.3   | TRANSCRIPTION                                                                                                   |
| CA1944 | 0.8 | 0.8 | 0.9 | IPF10645   | 7579486..7 unknown function                  | orf19.4738  | 10645 |            |                                                                                                                 |
| CA1945 | 0.9 | 0.9 | 0.8 | MSS116     | complemer RNA helicase of the D              | orf19.4739  | 10643 | IPF10645   | UNCLASSImolecular_function unknown                                                                              |
| CA1946 | 0.9 | 0.9 | 1.0 | IPF19937   | complemer putative peptidyl-tRNA             | orf19.4740  | 19937 | CaMSS116   | TRANSCR RNA binding,helicase activity                                                                           |

|        |     |     |     |            |                                                |       |            |                                                                         |
|--------|-----|-----|-----|------------|------------------------------------------------|-------|------------|-------------------------------------------------------------------------|
| CA1947 | 1.0 | 0.9 | 1.1 | IPF10637   | 7585182..7 starvation protein-like orf19.1220  | 10637 | IPF19937   | PROTEIN hydrolase activity                                              |
| CA1948 | 1.0 | 5.6 | 0.9 | IPF14022   | complemer ATPase family gene (b)orf19.1220     | 14022 | IPF10637   | SUBCELLULAR LOCALISATION                                                |
| CA1949 | 0.8 | 0.9 | 0.9 | IPF14021   | complemer dual specificity phosph orf19.1220   | 14021 | IPF14022   | CLASSIFICATION NOT YET CLEAR-CUT                                        |
| CA1950 | 0.9 | 0.9 | 0.8 | IPF14019   | complemer unknown function orf19.1220          | 14019 | IPF14021   | CLASSIFICATION hydrolyase activity                                      |
| CA1951 | 1.0 | 0.9 | 0.9 | HEM14      | 7593736..7 Mitochondrial protopor orf19.1220   | 19663 | IPF14019   | UNCLASSIFIED molecular_function unknown                                 |
| CA1952 | 0.8 | 0.7 | 0.9 | IPF1       | 7599449..7 Unknown function orf19.762          | 3901  | CaHEM14    | Metabolism oxidoreductase activity                                      |
| CA1953 | 1.0 | 1.0 | 1.1 | IPF3899    | complemer similar to Saccharomy orf19.763      | 3899  | CaIFP1     | No significant S.c. match                                               |
| CA1954 | 1.0 | 1.0 | 1.0 | IPF3897.5f | 7602644..7 unknown function, 5-pr orf19.764    | 18581 | IPF3899    | CELL CYC RNA binding                                                    |
| CA1955 | 1.0 | 1.1 | 1.1 | IPF3897.3f | 7603593..7 unknown function, 3-pr orf19.765    | 3897  | IPF3897.5f | UNCLASSIFIED molecular_function unknown                                 |
| CA1956 | 1.1 | 0.9 | 2.1 | ERG3       | 7606896..7 C5,6 desaturase orf19.767           | 3890  | IPF3897.3f | UNCLASSIFIED PROTEINS                                                   |
| CA1957 | 1.1 | 1.0 | 1.0 | IPF3887    | 7609190..7 similar to Saccharomy orf19.768     | 3887  | CaERG3     | Lipid fatty-oxidoreductase activity                                     |
| CA1958 | 1.0 | 1.1 | 1.1 | IFE1       | complemer unknown function orf19.769           | 3885  | IPF3887    | REGULATION molecular_function unknown                                   |
| CA1959 | 1.1 | 1.0 | 1.2 | IFD2       | complemer putative oxidoreductas orf19.771     | 3883  | CaIFE1     | C-compound oxidoreductase activity                                      |
| CA1960 | 1.0 | 1.0 | 1.0 | IPF15232   | 7617490..7 unknown function orf19.2400         | 15232 | CaIFD2     | C-compound oxidoreductase activity                                      |
| CA1961 | 1.0 | 0.9 | 0.9 | IPF14284   | complemer putative dnaJ-like prot orf19.2399   | 15229 | IPF15232   | UNCLASSIFIED molecular_function unknown                                 |
| CA1962 | 0.8 | 1.0 | 0.8 | IPF14285   | complemer unknown function orf19.2398          | 14285 | IPF14284   | PROTEIN molecular_function unknown                                      |
| CA1963 | 1.0 | 0.9 | 1.0 | IPF14040   | 7627840..7 probable transporter (t)orf19.2397  | 14040 | IPF14285   | No significant S.c. match                                               |
| CA1964 | 0.9 | 1.1 | 1.0 | IFR2       | 7630467..7 unknown function orf19.2396         | 14036 | IPF14040   | TRANSPORT FACILITATION                                                  |
| CA1965 | 1.0 | 1.0 | 1.0 | IPF14035   | complemer Similar to serine/threor orf19.2395  | 14035 | CaIFR2     | SUBCELLULAR LOCALISATION                                                |
| CA1966 | 0.9 | 0.9 | 1.0 | IFR4       | complemer unknown function orf19.2394          | 11494 | IPF14035   | CELL CYC protein kinase activity                                        |
| CA1967 | 0.9 | 1.3 | 1.0 | IPF10866   | 7638111..7 similar to Saccharomy orf19.5219    | 10866 | CaIFR4     | SUBCELLULAR oxidoreductase activity                                     |
| CA1968 | 0.9 | 0.9 | 1.0 | IPF10864   | complemer similar to Saccharomy orf19.5220     | 10864 | IPF10866   | Nucleotide enzyme regulator activity                                    |
| CA1969 | 1.0 | 1.0 | 1.0 | IPF18579.5 | complemer unknown function, 3-pr orf19.5221    | 10863 | IPF10864   | CELL CYC hydrolase activity                                             |
| CA1970 | 0.7 | 0.5 | 0.9 | IPF18579.4 | complemer unknown function, 5-pr orf19.5222    | 18579 | IPF18579.5 | UNCLASSIFIED molecular_function unknown                                 |
| CA1971 | 1.0 | 1.0 | 0.9 | PKH2       | 7651993..7 Ser/Thr protein kinase orf19.5224   | 10418 | IPF18579.4 | No significant S.c. match                                               |
| CA1972 | 0.8 | 0.9 | 0.9 | RPL27A     | 7656496..7 ribosomal protein L27               | 10412 | CaPKH2     | UNCLASSIFIED protein kinase activity                                    |
| CA1973 | 1.0 | 0.9 | 1.0 | WRS1       | 7657314..7 tryptophan-tRNA ligas orf19.5226    | 10411 | CaRPL27A   | PROTEIN structural molecule activity                                    |
| CA1974 | 1.0 | 1.2 | 1.1 | IPF10410   | complemer unknown function orf19.5227          | 10410 | CaWRS1     | PROTEIN ligase activity                                                 |
| CA1975 | 1.0 | 1.0 | 1.0 | PLB1       | complemer phospholipase B orf19.689            | 9584  | IPF10410   | UNCLASSIFIED molecular_function unknown                                 |
| CA1976 | 1.1 | 1.0 | 1.0 | IPF9582    | 7666057..7 similar to Saccharomy orf19.688     | 9582  | CaPLB1     | Lipid fatty-acid and isoprenoid metabolism ""Other virulence attributes |
| CA1977 | 1.5 | 1.6 | 1.1 | RPL25.3    | 7667499..7 ribosomal protein L23a, 3-prime er  | 9581  | IPF9582    | PROTEIN structural molecule activity                                    |
| CA1978 | 1.1 | 1.1 | 1.0 | IPF9580    | complemer unknown function orf19.687           | 9580  | CaRPL25.3  | PROTEIN RNA binding                                                     |
| CA1979 | 0.8 | 0.7 | 0.8 | IPF9577    | 7670060..7 unknown function orf19.686          | 9577  | IPF9580    | No significant S.c. match                                               |
| CA1980 | 1.0 | 1.0 | 1.0 | YHM1       | complemer member of the mitoch orf19.685       | 16978 | IPF9577    | UNCLASSIFIED molecular_function unknown                                 |
| CA1981 | 1.0 | 0.9 | 1.0 | IPF9470    | 7674421..7 similar to Saccharomy orf19.684     | 9470  | CaYHM1     | CELLULAR transporter activity                                           |
| CA1982 | 0.8 | 0.9 | 0.9 | ADK1       | complemer adenylate kinase, cyto: orf19.683    | 20093 | IPF9470    | TRANSCRIPTION protein binding                                           |
| CA1983 | 1.5 | 1.6 | 1.3 | ILV5       | complemer ketol-acid reducto-ison orf19.7733   | 9595  | CaADK1     | Nucleotide transferase activity                                         |
| CA1984 | 1.0 | 1.0 | 1.1 | IPF9592    | 7685772..7 unknown function orf19.7736         | 9592  | CaILV5     | Amino acid oxidoreductase activity                                      |
| CA1985 | 1.0 | 1.0 | 1.0 | IPF9591    | complemer unknown function orf19.91            | 9591  | IPF9592    | UNCLASSIFIED PROTEINS                                                   |
| CA1986 | 0.8 | 0.9 | 0.9 | IPF14899   | complemer unknown function orf19.92            | 14899 | IPF9591    | UNCLASSIFIED molecular_function unknown                                 |
| CA1987 | 0.9 | 1.0 | 0.9 | IPF14895   | 7693851..7 unknown function orf19.7739         | 14895 | IPF14899   | UNCLASSIFIED molecular_function unknown                                 |
| CA1988 | 1.1 | 1.0 | 1.0 | IPF19749   | complemer unknown function orf19.94            | 19749 | IPF14895   | UNCLASSIFIED molecular_function unknown                                 |
| CA1989 | 1.1 | 0.9 | 1.0 | IPF16596   | complemer unknown function orf19.95            | 16596 | IPF19749   | No significant S.c. match                                               |
| CA1990 | 1.0 | 1.0 | 1.0 | TOP1       | complemer CANAL DNA TOPOIS orf19.7742          | 17557 | IPF16596   | No significant S.c. match                                               |
| CA1991 | 1.1 | 1.0 | 1.1 | IPF6617.RI | 7702053..7 unknown function, repx orf19.1383   | 6619  | CaTOP1     | CELL CYC isomerase activity                                             |
| CA1992 | 1.0 | 1.0 | 1.0 | IPF6617.RI | 7703699..7 unknown function, repx orf19.6484   | 6617  | IPF6617.re | UNCLASSIFIED PROTEINS                                                   |
| CA1993 | 1.1 | 1.0 | 1.1 | IPF6614    | 7704943..7 unknown function orf19.6482         | 6614  | IPF6617.re | No significant S.c. match                                               |
| CA1994 | 1.0 | 0.8 | 1.1 | IPF6613    | 7705947..7 unknown function orf19.6481         | 6613  | IPF6614    | PROTEIN SYNTHESIS SUBCELLULAR LOCALISATION                              |
| CA1995 | 1.0 | 1.1 | 1.0 | IPF6612    | complemer unknown function orf19.6480          | 6612  | IPF6613    | CLASSIFICATION peptidase activity                                       |
| CA1996 | 1.1 | 1.0 | 1.2 | SEC1       | 7710748..7 transport protein orf19.6479        | 6609  | IPF6612    | UNCLASSIFIED transporter activity                                       |
| CA1997 | 1.1 | 1.0 | 1.0 | YCF1       | 7713550..7 Glutathione S-conjugat orf19.6478   | 6607  | CaSEC1     | CELLULAR protein binding                                                |
| CA1998 | 1.0 | 1.1 | 1.0 | IPF6605    | complemer unknown function orf19.6477          | 6605  | CaYCF1     | CELLULAR transporter activity                                           |
| CA1999 | 0.9 | 1.0 | 1.0 | IPF19513   | complemer unknown function orf19.1383          | 19513 | IPF6605    | UNCLASSIFIED protein binding                                            |
| CA2000 | 1.1 | 1.0 | 1.0 | IPF11796   | 7724290..7 unknown function orf19.2791         | 11796 | IPF19513   | UNCLASSIFIED molecular_function unknown                                 |
| CA2001 | 1.5 | 1.5 | 1.1 | IPF17074   | 7729908..7 unknown function orf19.2792         | 17074 | IPF11796   | No significant S.c. match                                               |
| CA2002 | 1.0 | 0.9 | 1.0 | IPF16470   | complemer unknown function orf19.2794          | 16470 | IPF17074   | UNCLASSIFIED molecular_function unknown                                 |
| CA2003 | 1.0 | 1.0 | 0.9 | IPF16471   | 7734019..7 unknown function orf19.2795         | 16471 | IPF16470   | UNCLASSIFIED isomerase activity                                         |
| CA2004 | 1.0 | 0.9 | 0.9 | POL12      | 7735550..7 DNA-directed DNA pol orf19.2796     | 15718 | IPF16471   | TRANSCRIPTION RNA binding                                               |
| CA2005 | 1.1 | 1.0 | 1.1 | IPF11802   | 7737793..7 unknown function orf19.2797         | 11802 | CaPOL12    | CELL CYC nucleotidyltransferase activity                                |
| CA2006 | 1.0 | 1.0 | 1.0 | IPF11801   | 7739903..7 unknown function orf19.2798         | 11801 | IPF11802   | UNCLASSIFIED PROTEINS                                                   |
| CA2007 | 1.0 | 1.1 | 1.0 | GP18       | 7742136..7 essential for GPI anch orf19.2799   | 11799 | IPF11801   | UNCLASSIFIED helicase activity                                          |
| CA2008 | 0.9 | 1.0 | 1.0 | IPF1742.3f | 7744454..7 unknown function, 3-prime end       | 1740  | CaGP18     | Lipid fatty-z hydrolase activity                                        |
| CA2009 | 1.0 | 1.1 | 1.0 | IPF1732    | 7747497..7 intramitochondrial prot orf19.3089  | 1732  | IPF1742.3f | No significant S.c. match                                               |
| CA2010 | 1.1 | 1.0 | 1.0 | IPF1731    | 7748288..7 unknown function orf19.3088         | 1731  | IPF1732    | PROTEIN molecular_function unknown                                      |
| CA2011 | 1.9 | 2.8 | 1.5 | RPS31      | 7749911..7 Ubiquitin fusion protein orf19.3087 | 1727  | IPF1731    | REGULATION molecular_function unknown                                   |
| CA2012 | 1.0 | 1.0 | 1.0 | SEC10      | 7750545..7 Required for exocytosi orf19.3086   | 1725  | CaRPS31    | PROTEIN structural molecule activity                                    |
| CA2013 | 1.0 | 1.1 | 1.0 | CDC1       | complemer Cell division control prc orf19.3083 | 1720  | CaSEC10    | CELLULAR protein binding                                                |
| CA2014 | 1.1 | 1.0 | 0.9 | IPF1717    | complemer similar to Saccharomy orf19.1059     | 1717  | CaCDC1     | CELL CYC molecular_function unknown                                     |
| CA2015 | 0.9 | 0.9 | 1.0 | IPF3416    | 7762798..7 unknown function orf19.8468         | 14806 | IPF1717    | CELL CYC protein kinase activity                                        |
| CA2016 | 1.0 | 1.2 | 0.9 | IPF3415    | 7764256..7 similar to Saccharomy orf19.8467    | 3415  | IPF3416    | No significant S.c. match                                               |
| CA2017 | 1.1 | 1.0 | 0.9 | IPF3414    | complemer putative serine/threonin orf19.846   | 3414  | IPF3415    | PROTEIN peptidase activity                                              |
| CA2018 | 1.1 | 1.1 | 1.0 | STE11      | complemer ser/thr protein kinase c orf19.844   | 3412  | IPF3414    | CLASSIFICATION protein kinase activity                                  |

|        |     |     |     |            |                                              |            |                  |                                                                                                     |
|--------|-----|-----|-----|------------|----------------------------------------------|------------|------------------|-----------------------------------------------------------------------------------------------------|
| CA2019 | 1.1 | 1.0 | 1.0 | IPF3409    | complemer unknown function                   | orf19.8463 | 3409 CaSTE11     | REGULATI protein kinase activity,signal transducer activity                                         |
| CA2020 | 2.2 | 0.9 | 2.9 | IPF16901   | complemer unknown function                   | orf19.8462 | 16901 IPF3409    | UNCLASSI molecular_function unknown                                                                 |
| CA2021 | 1.0 | 1.2 | 1.0 | IPF17283   | complemer unknown function                   | orf19.4907 | 17283 IPF16901   | No significant S.c. match                                                                           |
| CA2022 | 0.2 | 0.1 | 0.9 | CBK1       | complemer serine/threonine protei            | orf19.4909 | 9611 IPF17283    | UNCLASSI molecular_function unknown                                                                 |
| CA2023 | 1.4 | 2.2 | 1.4 | RPL42.3    | complemer ribosomal protein L36a, 3-prime ei |            | 9613 CaCBK1      | CLASSIFIC protein kinase activity                                                                   |
| CA2024 | 1.0 | 1.0 | 1.0 | IPF9616    | complemer unknown function                   | orf19.4910 | 9616 CaRPL42.3   | PROTEIN : structural molecule activity                                                              |
| CA2025 | 0.9 | 1.0 | 1.0 | IPF9618    | 7791388..7 unknown function                  | orf19.4911 | 9618 IPF9616     | No significant S.c. match                                                                           |
| CA2026 | 1.0 | 1.0 | 1.0 | IPF9777    | 7796233..7 unknown function                  | orf19.1096 | 9777 IPF9618     | No significant S.c. match                                                                           |
| CA2027 | 1.1 | 1.0 | 1.1 | MCK1       | complemer ser/thr/tyr protein kinas          | orf19.1096 | 9776 IPF9777     | UNCLASSI molecular_function unknown                                                                 |
| CA2028 | 1.1 | 1.0 | 1.0 | IPF18561.3 | complemer unknown function, , 3-prime end    |            | 18561 CaMCK1     | CELL CYC protein kinase activity                                                                    |
| CA2029 | 1.0 | 1.1 | 1.1 | SAR1.3     | 7804767..7 GTP-binding protein of            | orf19.1096 | 13117 IPF18561.3 | No significant S.c. match                                                                           |
| CA2030 | 0.9 | 0.8 | 0.9 | IPF13116   | 7806274..7 unknown function                  | orf19.3463 | 13116 CaSAR1.3   | CELLULAF hydrolase activity                                                                         |
| CA2031 | 1.8 | 2.3 | 1.6 | RPL10A     | complemer L10A ribosomal protei              | orf19.3465 | 13114 IPF13116   | UNCLASSI hydrolase activity                                                                         |
| CA2032 | 1.0 | 1.7 | 1.1 | IPF13112   | 7809533..7 unknown function                  | orf19.3466 | 13112 CaRPL10A   | PROTEIN : structural molecule activity                                                              |
| CA2033 | 1.0 | 0.8 | 1.0 | SEC27      | complemer coatomer complex bet               | orf19.1097 | 16985 IPF13112   | UNCLASSIFIED PROTEINS                                                                               |
| CA2034 | 0.9 | 0.9 | 1.0 | SGD1.3F    | complemer involved in HOG pathway, 3-prime   |            | 18558 CaSEC27    | CELLULAF molecular_function unknown                                                                 |
| CA2035 | 0.9 | 1.0 | 0.9 | SGD1.5F    | complemer involved in HOG pathw              | orf19.1184 | 7574 CaSGD1.3    | REGULATION OF/INTERACTION WITH CELLULAR ENVIRONMENT                                                 |
| CA2036 | 1.0 | 1.0 | 1.0 | MSP1       | 7823690..7 40 kDa putative memb              | orf19.4362 | 7571 CaSGD1.5    | REGULATI molecular_function unknown                                                                 |
| CA2037 | 1.1 | 1.0 | 1.0 | IFF3       | complemer unknown function                   | orf19.1183 | 20094 CaMSP1     | PROTEIN I hydrolase activity                                                                        |
| CA2038 | 1.1 | 1.0 | 1.1 | IPF17510   | complemer unknown function                   | orf19.1183 | 17510 CaIFF3     | UNCLASSIFIED PROTEINS                                                                               |
| CA2039 | 0.9 | 0.9 | 0.9 | IPF12947   | 7830501..7 unknown function                  | orf19.1183 | 12947 IPF17510   | UNCLASSI molecular_function unknown                                                                 |
| CA2040 | 1.0 | 1.0 | 1.1 | IPF12946   | complemer unknown function                   | orf19.4356 | 12946 IPF12947   | UNCLASSI molecular_function unknown                                                                 |
| CA2041 | 1.0 | 0.9 | 1.0 | IPF12944   | 7836414..7 unknown function                  |            | 12944 IPF12946   | C-compour molecular_function unknown                                                                |
| CA2042 | 0.9 | 0.9 | 1.1 | IPF14219   | complemer probable membrane pr               | orf19.1044 | 14219 IPF12944   | No significant S.c. match                                                                           |
| CA2043 | 1.0 | 1.0 | 1.0 | GSL21      | complemer 1,3-beta-D-glucan synt             | orf19.2929 | 10681 IPF14219   | UNCLASSI molecular_function unknown                                                                 |
| CA2044 | 0.8 | 0.7 | 0.9 | IPF10668   | complemer unknown function                   | orf19.1044 | 10668 CaGSL21    | C-compour transferase activity                                                                      |
| CA2045 | 0.8 | 0.9 | 1.0 | IPF8107    | complemer unknown function                   | orf19.1045 | 10665 IPF10668   | UNCLASSI translation regulator activity                                                             |
| CA2046 | 1.1 | 1.0 | 1.1 | IPF8108    | complemer unknown function                   | orf19.1045 | 8108 IPF8107     | UNCLASSI molecular_function unknown                                                                 |
| CA2047 | 1.6 | 2.5 | 1.3 | RPL10      | 7856908..7 Ribosomal protein L10             | orf19.1045 | 8109 IPF8108     | UNCLASSI molecular_function unknown                                                                 |
| CA2049 | 0.9 | 0.9 | 1.0 | IPF12982   | complemer unknown function                   | orf19.1314 | 12982 CaRPL10    | CELL CYC structural molecule activity                                                               |
| CA2050 | 0.9 | 1.0 | 1.0 | IPF11023   | complemer unknown function                   | orf19.1314 | 11023 IPF12982   | No significant S.c. match                                                                           |
| CA2051 | 1.0 | 1.0 | 1.0 | PXP5       | complemer acyl-coenzyme A oxide              | orf19.5723 | 11025 IPF11023   | No significant S.c. match                                                                           |
| CA2052 | 1.0 | 1.0 | 1.0 | IPF11027   | 7867877..7 unknown function                  | orf19.5722 | 11027 CaPXP5     | Lipid fatty-acid and isoprenoid metabolism ""ENERGY SUBCELLULAR LOCALISATION                        |
| CA2053 | 1.1 | 1.1 | 1.0 | IPF11029   | complemer unknown function                   | orf19.5720 | 11029 IPF11027   | TRANSCR molecular_function unknown                                                                  |
| CA2055 | 0.9 | 0.8 | 1.0 | SAP4       | 7877137..7 secreted aspartyl prote           | orf19.5716 | 8099 IPF11029    | TRANSPORT FACILITATION                                                                              |
| CA2056 | 0.9 | 0.9 | 1.0 | URA5       | 7881609..7 Orotate phosphoribosy             | orf19.2555 | 7845 CaSAP4      | PROTEIN FATE [folding modification destination] ""Other virulence attributes                        |
| CA2057 | 0.9 | 0.9 | 0.9 | SEC65      | complemer Recognition particle su            | orf19.2557 | 7847 CaURA5      | Nucleotide transferase activity                                                                     |
| CA2058 | 1.1 | 0.9 | 1.1 | IPF7848    | 7883632..7 unknown function                  | orf19.2558 | 7848 CaSEC65     | PROTEIN I molecular_function unknown                                                                |
| CA2059 | 1.0 | 1.4 | 1.1 | CDC4       | complemer CANAL CELL DIVISIO                 | orf19.2559 | 7849 IPF7848     | No significant S.c. match                                                                           |
| CA2060 | 1.0 | 1.1 | 1.0 | CDC61.3F   | complemer Cytosolic leucyl-tRNA :            | orf19.2560 | 7853 CaCDC4      | CELL CYC protein binding                                                                            |
| CA2061 | 0.9 | 1.1 | 0.9 | CDC61.5F   | complemer Cytosolic leucyl-tRNA :            | orf19.2562 | 7856 CaCDC61.    | PROTEIN SYNTHESIS SUBCELLULAR LOCALISATION                                                          |
| CA2062 | 0.9 | 1.0 | 1.0 | IPF7858    | complemer similar to Saccharomy              | orf19.2563 | 7858 CaCDC61.    | PROTEIN : ligase activity                                                                           |
| CA2063 | 1.0 | 1.0 | 1.0 | IPF7859    | 7895146..7 unknown function                  | orf19.2564 | 7859 IPF7858     | TRANSCR RNA binding                                                                                 |
| CA2064 | 0.9 | 1.0 | 0.9 | IPF13024   | complemer unknown function                   | orf19.1016 | 13024 IPF7859    | No significant S.c. match                                                                           |
| CA2065 | 0.7 | 0.8 | 0.5 | QCR2       | 7905191..7 Ubiquinol--cytochrome             | orf19.2644 | 6978 IPF13024    | TRANSCRIPTION SUBCELLULAR LOCALISATION                                                              |
| CA2066 | 0.9 | 0.8 | 0.9 | RPO26      | 7906716..7 DNA-directed RNA pol              | orf19.2643 | 6977 CaQCR2      | ENERGY " transporter activity,oxidoreductase activity                                               |
| CA2067 | 1.0 | 1.0 | 0.9 | IPF6976    | complemer unknown function                   | orf19.2642 | 6976 CaRPO26     | TRANSCR nucleotidyltransferase activity                                                             |
| CA2068 | 0.9 | 0.9 | 1.1 | ARP1       | 7908123..7 centraclin (by homolog            | orf19.2641 | 6975 IPF6976     | CELL CYCLE AND DNA PROCESSING CELLULAR TRANSPORT AND TRANSPORT MECHANISMS CELL FATE SUBCELLULAR LOC |
| CA2069 | 1.0 | 1.0 | 1.0 | FUR1       | complemer Uracil phosphoribosylt             | orf19.2640 | 6973 CaARP1      | CELL CYC structural molecule activity                                                               |
| CA2070 | 1.0 | 1.0 | 1.0 | IPF6971.3  | complemer unknown function, 3-prime end      |            | 6972 CaFUR1      | Nucleotide transferase activity                                                                     |
| CA2071 | 0.8 | 1.0 | 1.1 | IPF6971.5  | complemer unknown function, internal fragme  |            | 6971 IPF6971.3   | No significant S.c. match                                                                           |
| CA2072 | 1.1 | 0.9 | 1.0 | IPF6970    | complemer unknown function                   | orf19.2639 | 6970 IPF6971.5   | TRANSCR RNA binding                                                                                 |
| CA2073 | 1.0 | 1.0 | 0.9 | IPF6967    | 7915229..7 unknown function                  | orf19.1016 | 6967 IPF6970     | PROTEIN : structural molecule activity                                                              |
| CA2074 | 1.0 | 1.0 | 0.9 | IPF3733    | 7918556..7 unknown function                  | orf19.5287 | 3733 IPF6967     | No significant S.c. match                                                                           |
| CA2075 | 1.0 | 1.8 | 1.0 | IFE2       | 7921959..7 Unknown function                  | orf19.5288 | 3735 IPF3733     | C-compound and carbohydrate metabolism TRANSCRIPTION CELL FATE SUBCELLULAR LOCALISATION             |
| CA2076 | 1.2 | 1.4 | 1.2 | ERO1       | 7930054..7 Required for protein di           | orf19.4871 | 13354 CaIFE2     | C-compound and carbohydrate metabolism                                                              |
| CA2077 | 1.1 | 0.9 | 1.0 | IPF13353   | 7932518..7 unknown function                  | orf19.4872 | 13353 CaERO1     | PROTEIN I transporter activity                                                                      |
| CA2078 | 1.1 | 1.1 | 1.0 | IPF13352   | complemer unknown function                   | orf19.4873 | 13352 IPF13353   | No significant S.c. match                                                                           |
| CA2079 | 1.0 | 1.1 | 1.0 | MNN3       | complemer Golgi alpha-1,2-mann               | orf19.4874 | 13350 IPF13352   | No significant S.c. match                                                                           |
| CA2080 | 0.9 | 1.0 | 0.9 | IPF9693    | 7938813..7 unknown function                  | orf19.4875 | 9693 CaMNN3      | CELL FATE                                                                                           |
| CA2081 | 1.0 | 1.1 | 1.1 | IPF9699    | complemer unknown function                   | orf19.4878 | 9699 IPF9693     | UNCLASSI molecular_function unknown                                                                 |
| CA2082 | 1.1 | 1.1 | 1.1 | NTF2       | complemer nuclear transport factor (by homol |            | 9700 IPF9699     | UNCLASSI molecular_function unknown                                                                 |
| CA2083 | 1.0 | 0.9 | 0.9 | IPF3384.5f | 7950724..7 similar to Saccharomy             | orf19.832  | 3384 CaNTF2      | CELLULAF protein binding                                                                            |
| CA2084 | 1.1 | 1.1 | 1.1 | IPF3384.3f | 7953392..7 similar to Saccharomy             | orf19.833  | 3385 IPF3384.5f  | Secondary transferase activity                                                                      |
| CA2085 | 0.9 | 0.9 | 1.0 | IPF3388    | 7954273..7 unknown function                  | orf19.834  | 3388 IPF3384.3f  | Secondary metabolism                                                                                |
| CA2086 | 1.0 | 1.0 | 0.9 | IPF3392    | 7957232..7 unknown function                  | orf19.835  | 3392 IPF3388     | C-compound and carbohydrate metabolism                                                              |
| CA2087 | 1.0 | 0.9 | 1.1 | IPF3393    | complemer unknown function                   | orf19.836  | 3393 IPF3392     | UNCLASSI molecular_function unknown                                                                 |
| CA2088 | 0.9 | 0.8 | 1.0 | IPF3394    | 7961096..7 unknown function                  |            | 3394 IPF3393     | No significant S.c. match                                                                           |
| CA2089 | 1.0 | 1.0 | 1.1 | GNA1       | complemer Acetyltransferase                  | orf19.837  | 3395 IPF3394     | TRANSCR RNA binding                                                                                 |
| CA2090 | 0.9 | 1.1 | 1.0 | IPF3398.3  | 7963718..7 unknown function, 3-prime end     |            | 3398 CaGNA1      | CELL CYC transferase activity                                                                       |
| CA2091 | 0.9 | 0.8 | 0.9 | IPF3401    | complemer unknown function                   | orf19.839  | 3401 IPF3398.3   | No significant S.c. match                                                                           |
| CA2092 | 1.7 | 1.3 | 1.4 | RPL21A.3   | 7968235..7 Ribosomal protein, 3-p            | orf19.840  | 3404 IPF3401     | UNCLASSI molecular_function unknown                                                                 |

|        |     |     |     |            |                                                |            |                  |                                                                                                                           |
|--------|-----|-----|-----|------------|------------------------------------------------|------------|------------------|---------------------------------------------------------------------------------------------------------------------------|
| CA2093 | 1.1 | 1.2 | 1.0 | IPF3406    | 7969031..7 unknown function                    | orf19.841  | 3406 CaRPL21A    | PROTEIN † structural molecule activity                                                                                    |
| CA2094 | 1.0 | 1.0 | 1.0 | IPF11493   | complemer unknown function                     | orf19.9929 | 11493 IPF3406    | CELL CYC molecular_function unknown                                                                                       |
| CA2095 | 0.9 | 0.8 | 0.9 | IPF11492   | complemer unknown function                     | orf19.2392 | 11492 IPF11493   | TRANSCRIPTION                                                                                                             |
| CA2096 | 1.0 | 1.0 | 1.0 | IPF11491   | 7975446..7 unknown function                    | orf19.2391 | 11491 IPF11492   | No significant S.c. match                                                                                                 |
| CA2097 | 0.9 | 0.9 | 0.9 | IPF11489   | complemer unknown function                     | orf19.2389 | 11489 IPF11491   | UNCLASSI molecular_function unknown                                                                                       |
| CA2098 | 1.1 | 1.0 | 1.0 | IPF11487   | complemer unknown function                     | orf19.2387 | 11487 IPF11489   | CELL CYC molecular_function unknown                                                                                       |
| CA2099 | 0.9 | 0.9 | 0.9 | IPF11484   | 7979812..7 unknown function                    | orf19.2386 | 11484 IPF11487   | UNCLASSI molecular_function unknown                                                                                       |
| CA2100 | 1.1 | 1.0 | 1.0 | KTI12      | complemer involved in resistance to            | orf19.2385 | 9366 IPF11484    | UNCLASSI RNA binding                                                                                                      |
| CA2101 | 1.0 | 1.2 | 1.0 | IPF9364    | 7981669..7 unknown function                    | orf19.2384 | 9364 CaKTI12     | CELL RES enzyme regulator activity                                                                                        |
| CA2102 | 1.2 | 1.1 | 1.1 | IPF9363    | complemer similar to Saccharomy                | orf19.2383 | 9363 IPF9364     | UNCLASSI hydrolase activity                                                                                               |
| CA2103 | 0.9 | 0.9 | 1.1 | ISM1       | 7984853..7 isoleucyl-tRNA synthet              | orf19.9918 | 9361 IPF9363     | CELL CYC DNA binding                                                                                                      |
| CA2104 | 1.0 | 0.9 | 1.0 | IPF19939   | 7988103..7 unknown function                    | orf19.9917 | 19939 CaISM1     | PROTEIN † ligase activity                                                                                                 |
| CA2105 | 1.0 | 1.0 | 1.1 | IPF10711   | 7993256..7 unknown function                    | orf19.3694 | 10711 IPF19939   | No significant S.c. match                                                                                                 |
| CA2106 | 1.1 | 1.1 | 1.1 | IPF10714   | 7997299..7 similar to pH-regulated             | orf19.3693 | 10714 IPF10711   | UNCLASSIFIED PROTEINS                                                                                                     |
| CA2107 | 1.0 | 1.0 | 1.0 | IPF10716   | complemer unknown function                     | orf19.3691 | 10716 IPF10714   | CONTROL molecular_function unknown                                                                                        |
| CA2108 | 1.5 | 1.1 | 1.5 | RPL26A.3   | 8001738..8 ribosomal protein, 3-prime end (b   |            | 10719 IPF10716   | UNCLASSI molecular_function unknown                                                                                       |
| CA2109 | 0.9 | 0.9 | 0.8 | IPF13749.† | 8003001..8 unknown function, 5-pr orf19.3690   |            | 13749 CaRPL26A   | PROTEIN † RNA binding                                                                                                     |
| CA2110 | 0.9 | 0.9 | 0.8 | IPF13749.‡ | 8004053..8 unknown function, 3-pr orf19.3689   |            | 18544 IPF13749.† | C-compour molecular_function unknown                                                                                      |
| CA2111 | 0.9 | 0.9 | 1.0 | IPF13748   | 8004941..8 Unknown function                    | orf19.3688 | 13748 IPF13749.‡ | C-compound and carbohydrate metabolism ENERGY                                                                             |
| CA2112 | 1.1 | 1.1 | 1.0 | PFD1       | complemer Prefoldin subunit 1 (by orf19.3687   |            | 13747 IPF13748   | UNCLASSI molecular_function unknown                                                                                       |
| CA2113 | 1.1 | 1.1 | 1.1 | ATP12      | 8005890..8 F1FO-ATPase complex orf19.3686      |            | 13746 CaPFD1     | PROTEIN † chaperone activity                                                                                              |
| CA2114 | 1.0 | 0.9 | 1.0 | IPF13744   | 8007912..8 protein involved in regul           | orf19.3685 | 13744 CaATP12    | PROTEIN † chaperone activity                                                                                              |
| CA2115 | 1.0 | 1.1 | 1.1 | IPF8030    | 8014628..8 unknown function                    | orf19.8911 | 8030 IPF13744    | C-compour molecular_function unknown                                                                                      |
| CA2116 | 1.0 | 1.0 | 1.1 | SNG4       | complemer Drug transporter (by hc orf19.1332   |            | 8028 IPF8030     | CELL CYC molecular_function unknown                                                                                       |
| CA2117 | 1.0 | 1.0 | 1.0 | SNG3       | 8018926..8 Drug transporter (by hc orf19.1333  |            | 8025 CaSNG4      | CELL RESCUE DEFENSE AND VIRULENCE                                                                                         |
| CA2118 | 1.1 | 1.0 | 1.0 | IPF8024    | 8023334..8 unknown function                    | orf19.1334 | 8024 CaSNG3      | CELL RESCUE DEFENSE AND VIRULENCE ""TRANSPORT FACILITATION                                                                |
| CA2119 | 0.9 | 1.0 | 0.9 | MTR4       | 8025570..8 RNA Helicase (by hom orf19.8915     |            | 8020 IPF8024     | No significant S.c. match                                                                                                 |
| CA2120 | 1.0 | 1.0 | 1.1 | PUP3       | 8029039..8 PRCT yeast proteasome compone       |            | 8017 CaMTR4      | TRANSCR RNA binding,helicase activity                                                                                     |
| CA2121 | 1.1 | 1.1 | 1.0 | IPF7930    | 8030927..8 unknown function                    | orf19.8918 | 7930 CaPUP3      | PROTEIN † peptidase activity                                                                                              |
| CA2122 | 1.1 | 1.1 | 1.1 | CPY1.3F    | complemer Carboxypeptidase Y pr orf19.8919     |            | 18540 IPF7930    | UNCLASSI molecular_function unknown                                                                                       |
| CA2124 | 1.1 | 1.1 | 1.0 | IPF10490   | complemer unknown function                     | orf19.8049 | 10490 CaCPY1.3F  | PROTEIN FATE [folding modification destination] ""SUBCELLULAR LOCALISATION                                                |
| CA2125 | 0.9 | 1.1 | 1.0 | IPF4893    | 8040201..8 unknown function                    | orf19.418  | 4893 IPF10490    | No significant S.c. match                                                                                                 |
| CA2126 | 1.1 | 1.0 | 1.1 | IPF4896    | 8045299..8 unknown function                    | orf19.417  | 4896 IPF4893     | UNCLASSI protein binding                                                                                                  |
| CA2127 | 0.8 | 0.8 | 1.0 | IPF4897    | complemer unknown function                     | orf19.416  | 4897 IPF4896     | CELLULAF transporter activity                                                                                             |
| CA2128 | 1.0 | 1.2 | 1.0 | IPF4898    | complemer unknown function                     | orf19.415  | 4898 IPF4897     | No significant S.c. match                                                                                                 |
| CA2129 | 0.9 | 1.0 | 1.0 | IPF4899    | 8048921..8 unknown function                    | orf19.414  | 4899 IPF4898     | UNCLASSI molecular_function unknown                                                                                       |
| CA2130 | 1.1 | 1.0 | 1.1 | RPS27A     | complemer ribosomal protein S27.e (by homol    |            | 4901 IPF4899     | UNCLASSI structural molecule activity                                                                                     |
| CA2131 | 1.1 | 0.9 | 1.0 | IDP1       | complemer isocitrate dehydrogenase orf19.5211  |            | 5863 CaRPS27A    | PROTEIN SYNTHESIS SUBCELLULAR LOCALISATION                                                                                |
| CA2132 | 0.9 | 0.8 | 1.0 | IPF5865    | 8057765..8 unknown function                    | orf19.5212 | 5865 CaIDP1      | C-compound and carbohydrate metabolism ENERGY SUBCELLULAR LOCALISATION                                                    |
| CA2133 | 1.2 | 1.2 | 1.2 | IPF5866    | 8059498..8 unknown function                    | orf19.5213 | 5866 IPF5865     | CELL CYC DNA binding                                                                                                      |
| CA2134 | 0.8 | 0.6 | 1.0 | COX8       | complemer CYTOCHROME C OX orf19.5213           |            | 5867 IPF5866     | TRANSCRIPTION SUBCELLULAR LOCALISATION                                                                                    |
| CA2135 | 1.1 | 1.2 | 1.1 | COX9       | 8062863..8 CYTOCHROME C OXIDASE (by h          |            | 5868 CaCOX8      | ENERGY † oxidoreductase activity                                                                                          |
| CA2136 | 1.0 | 0.9 | 1.0 | VPS33      | complemer VACUOLAR PROTEIN orf19.5214          |            | 5870 CaCOX9      | ENERGY † oxidoreductase activity                                                                                          |
| CA2137 | 1.0 | 1.0 | 1.0 | ARP9       | 8076550..8 actin-related protein (b orf19.2507 |            | 15652 CaVPS33    | PROTEIN FATE [folding modification destination] ""CELLULAR TRANSPORT AND TRANSPORT MECHANISMS CONTROL OF CELLUL           |
| CA2139 | 1.0 | 0.9 | 1.0 | IPF15654.† | complemer unknown function, exo orf19.2509     |            | 15654 CaARP9     | SUBCELLL transcription regulator activity                                                                                 |
| CA2140 | 0.9 | 0.9 | 0.8 | IPF19665   | complemer unknown function                     | orf19.1004 | 19665 IPF15654.† | No significant S.c. match                                                                                                 |
| CA2141 | 0.9 | 0.9 | 0.8 | IPF19664   | complemer unknown function                     | orf19.1004 | 19664 IPF19665   | CELL CYC chaperone activity                                                                                               |
| CA2142 | 0.9 | 1.1 | 1.0 | MRPL33     | 8084879..8 ribosomal protein of the large sub  |            | 15872 IPF19664   | CELL CYCLE AND DNA PROCESSING SUBCELLULAR LOCALISATION                                                                    |
| CA2143 | 1.1 | 1.1 | 1.1 | IPF12803   | 8087503..8 unknown function                    | orf19.1004 | 12803 CaMRPL33   | PROTEIN † structural molecule activity                                                                                    |
| CA2144 | 1.1 | 1.0 | 1.0 | IPF12802   | complemer unknown function                     | orf19.2513 | 12802 IPF12803   | No significant S.c. match                                                                                                 |
| CA2145 | 1.1 | 1.1 | 1.0 | IPF12800   | 8090630..8 unknown function                    | orf19.2514 | 12800 IPF12802   | PROTEIN FATE [folding modification destination] ""SUBCELLULAR LOCALISATION                                                |
| CA2146 | 0.8 | 0.8 | 0.6 | IPF12799   | complemer unknown function                     | orf19.2515 | 12799 IPF12800   | PROTEIN FATE [folding modification destination]                                                                           |
| CA2147 | 1.1 | 1.0 | 1.0 | IPF18533   | 8095958..8 unknown function                    | orf19.2516 | 18533 IPF12799   | No significant S.c. match                                                                                                 |
| CA2148 | 1.0 | 1.0 | 1.0 | AUT1       | complemer similar to Saccharomy orf19.6020     |            | 10762 IPF18533   | Lipid fatty-acid and isoprenoid metabolism """"PROTEIN FATE [folding modification destination] ""SUBCELLULAR LOCALISATION |
| CA2149 | 1.1 | 1.5 | 1.4 | IPF10761   | complemer unknown function                     | orf19.6021 | 10761 CaAUT1     | PROTEIN † molecular_function unknown                                                                                      |
| CA2150 | 1.0 | 0.9 | 0.9 | IPF19940   | 8108317..8 unknown function                    | orf19.6022 | 19940 IPF10761   | No significant S.c. match                                                                                                 |
| CA2151 | 1.0 | 1.0 | 1.0 | ERC2       | complemer ethionine resistance pr orf19.6023   |            | 7898 IPF19940    | No significant S.c. match                                                                                                 |
| CA2152 | 0.9 | 0.9 | 1.0 | IPF7899    | complemer unknown function                     | orf19.6024 | 7899 CaERC2      | UNCLASSIFIED PROTEINS                                                                                                     |
| CA2153 | 1.0 | 1.0 | 1.1 | IPF7900    | complemer unknown function                     | orf19.6025 | 7900 IPF7899     | No significant S.c. match                                                                                                 |
| CA2154 | 1.0 | 1.0 | 1.0 | ERG2       | 8115702..8 C-8 sterol isomerase                | orf19.6026 | 7901 IPF7900     | UNCLASSI molecular_function unknown                                                                                       |
| CA2155 | 1.1 | 1.1 | 1.0 | IPF7903    | complemer unknown function                     | orf19.6027 | 7903 CaERG2      | Lipid fatty-ε isomerase activity                                                                                          |
| CA2156 | 1.2 | 1.1 | 1.1 | IPF8535    | complemer unknown function                     | orf19.5302 | 8535 IPF7903     | CELL CYC structural molecule activity                                                                                     |
| CA2157 | 1.2 | 1.1 | 1.1 | IPF8537    | complemer similar to Saccharomy orf19.5300     |            | 8537 IPF8535     | No significant S.c. match                                                                                                 |
| CA2158 | 1.0 | 1.0 | 0.9 | ECM1       | complemer involved in cell wall bio orf19.5299 |            | 8538 IPF8537     | SUBCELLL molecular_function unknown                                                                                       |
| CA2159 | 1.0 | 0.9 | 1.0 | IPF19753   | complemer similar to Saccharomy orf19.5297     |            | 19753 CaECM1     | CONTROL molecular_function unknown                                                                                        |
| CA2160 | 1.0 | 1.0 | 1.1 | IPF15664   | 8131953..8 unknown function                    | orf19.5296 | 15664 IPF19753   | CELL CYC transcription regulator activity                                                                                 |
| CA2161 | 1.0 | 1.0 | 0.9 | IPF11876   | 8133201..8 unknown function                    | orf19.5295 | 11876 IPF15664   | UNCLASSI molecular_function unknown                                                                                       |
| CA2162 | 1.3 | 1.4 | 1.1 | PDB1       | complemer pyruvate dehydrogenase orf19.5294    |            | 11877 IPF11876   | No significant S.c. match                                                                                                 |
| CA2163 | 1.0 | 1.1 | 1.0 | IPF11879   | 8137348..8 unknown function                    | orf19.5293 | 11879 CaPDB1     | C-compour oxidoreductase activity                                                                                         |
| CA2164 | 1.1 | 1.1 | 1.1 | AXL2       | complemer similar to saccharomyc orf19.5292    |            | 11881 IPF11879   | No significant S.c. match                                                                                                 |
| CA2165 | 1.0 | 1.0 | 1.0 | IPF17024   | complemer unknown function                     | orf19.5291 | 17024 CaAXL2     | CELL FATI molecular_function unknown                                                                                      |
| CA2166 | 1.1 | 1.1 | 0.9 | FEN12      | 8148907..8 Probable subunit of 1,‡ orf19.908   |            | 4547 IPF17024    | Lipid fatty-ε molecular_function unknown                                                                                  |

|        |     |     |     |            |                                       |              |                  |                                                                                                                                |
|--------|-----|-----|-----|------------|---------------------------------------|--------------|------------------|--------------------------------------------------------------------------------------------------------------------------------|
| CA2167 | 1.1 | 1.1 | 1.0 | IPF4553    | 8153414..8 unknown function           | orf19.909    | 4553 CaFEN12     | C-compound and carbohydrate metabolism ""Lipid fatty-acid and isoprenoid metabolism ""CELL FATE SUBCELLULAR LOCALISATION       |
| CA2168 | 1.0 | 1.0 | 1.0 | IPF4558    | complemer similar to Saccharomy       | orf19.910    | 4558 IPF4553     | Amino acid molecular_function unknown                                                                                          |
| CA2169 | 1.0 | 1.0 | 1.0 | IPF4563.5f | 8159313..8 similar to saccharomyc     | orf19.911    | 4563 IPF4558     | TRANSCR RNA binding                                                                                                            |
| CA2170 | 1.0 | 0.9 | 0.9 | IPF4563.3f | 8164556..8 similar to saccharomyc     | orf19.912    | 18528 IPF4563.5f | CELL CYCLE AND DNA PROCESSING                                                                                                  |
| CA2171 | 1.3 | 1.1 | 1.0 | PEP1.3     | 8166543..8 Vacuolar protein sortin    | orf19.3767   | 15204 IPF4563.3f | CELL CYCLE AND DNA PROCESSING                                                                                                  |
| CA2172 | 1.0 | 0.9 | 1.1 | IPF15377   | 8173047..8 probable membrane pro      | orf19.3765   | 15377 CaPEP1.3   | PROTEIN FATE [folding modification destination] ""CELLULAR TRANSPORT AND TRANSPORT MECHANISMS SUBCELLULAR LOCAL                |
| CA2173 | 0.9 | 0.8 | 1.0 | IPF18527   | 8177798..8 unknown function           | orf19.3764   | 18527 IPF15377   | UNCLASSI molecular_function unknown                                                                                            |
| CA2174 | 1.0 | 1.0 | 1.1 | IPF20096   | complemer unknown function            | orf19.3763   | 20096 IPF18527   | CELL CYC molecular_function unknown                                                                                            |
| CA2175 | 0.9 | 1.0 | 1.0 | IPF8892    | 8181927..8 unknown function           | orf19.3762   | 8892 IPF20096    | No significant S.c. match                                                                                                      |
| CA2176 | 1.0 | 0.9 | 1.0 | CDC54      | complemer cell division control pro   | orf19.1124   | 8893 IPF8892     | No significant S.c. match                                                                                                      |
| CA2177 | 1.1 | 1.0 | 1.0 | ROD1       | complemer O-dinitrobenzene, calci     | orf19.9084   | 19576 CaCDC54    | CELL CYC DNA binding                                                                                                           |
| CA2178 | 1.0 | 0.9 | 1.1 | IPF9282    | complemer unknown function            | orf19.1510   | 9282 CaROD1      | CELL RES molecular_function unknown                                                                                            |
| CA2179 | 0.9 | 1.0 | 1.0 | FAB1       | complemer phosphatidylinositol 3-     | orf19.9088   | 9288 IPF9282     | UNCLASSI molecular_function unknown                                                                                            |
| CA2180 |     |     |     | IPF9290    | 8207665..8208687                      |              | CaFAB1           | Lipid fatty-ε transferase activity                                                                                             |
| CA2181 | 1.0 | 1.1 | 1.0 | ECM331     | 8218869..8 Involved in cell wall bic  | orf19.4255   | 6869             |                                                                                                                                |
| CA2182 | 1.0 | 1.0 | 1.0 | IPF6871    | complemer unknown function            | orf19.4253   | 6871 CaECM331    | CELL CYC molecular_function unknown                                                                                            |
| CA2183 | 0.9 | 0.8 | 0.9 | IPF6872    | 8223014..8 serine/threonine protei    | orf19.4252   | 6872 IPF6871     | Nucleotide metabolism SUBCELLULAR LOCALISATION                                                                                 |
| CA2184 | 1.0 | 0.9 | 1.0 | IPF6874.3  | complemer unknown function, 3-pr      | orf19.4251   | 6874 IPF6872     | CLASSIFIC protein kinase activity                                                                                              |
| CA2185 | 0.9 | 0.8 | 0.9 | IPF6880    | 8228949..8 unknown function           | orf19.4247   | 6880 IPF6874.3   | No significant S.c. match                                                                                                      |
| CA2186 | 0.8 | 0.7 | 1.1 | IPF6881    | complemer putative phosphatidyl s     | orf19.4246   | 6881 IPF6880     | No significant S.c. match                                                                                                      |
| CA2187 | 1.0 | 1.0 | 1.1 | IPF11667   | 8241456..8 unknown function           | orf19.4771   | 11667 IPF6881    | UNCLASSIFIED PROTEINS                                                                                                          |
| CA2188 | 1.3 | 1.9 | 1.5 | SSU81      | complemer protein involved in the     | orf19.4772   | 19612 IPF11667   | PROTEIN FATE [folding modification destination]                                                                                |
| CA2189 | 2.2 | 1.9 | 1.4 | AOX2       | 8249622..8 alternative oxidase (by    | orf19.4773   | 9420 CaSSU81     | CELL RES signal transducer activity                                                                                            |
| CA2190 | 1.2 | 1.0 | 1.3 | AOX1       | 8252054..8 alternative oxidase (by    | orf19.4774   | 9418 CaAOX2      | No significant S.c. match                                                                                                      |
| CA2191 | 0.7 | 0.7 | 0.8 | IPF9417    | 8255108..8 similar to Saccharomy      | orf19.4775   | 9417 CaAOX1      | No significant S.c. match                                                                                                      |
| CA2193 | 1.0 | 0.9 | 0.9 | IPF14273   | 8268453..8 Probable ser/thr protei    | orf19.1182   | 14273 IPF9417    | CELL CYC DNA binding,transcription regulator activity                                                                          |
| CA2194 | 1.0 | 1.0 | 1.0 | RGR1       | 8271407..8 DNA-directed RNA pol       | orf19.1182   | 14271 IPF14273   | CLASSIFIC protein kinase activity,signal transducer activity                                                                   |
| CA2195 | 1.0 | 1.0 | 1.0 | IPF18517.3 | complemer unknown function, 3-pr      | orf19.1182   | 16819 CaRGR1     | C-compour transcription regulator activity                                                                                     |
| CA2196 | 1.0 | 1.0 | 0.9 | IPF18517.5 | complemer unknown function, 5-pr      | orf19.1182   | 18517 IPF18517.3 | UNCLASSI molecular_function unknown                                                                                            |
| CA2197 | 1.0 | 0.9 | 1.0 | IPF8110    | 8290521..8 unknown function           | orf19.2936   | 8110 IPF18517.5  | No significant S.c. match                                                                                                      |
| CA2198 | 1.2 | 1.4 | 1.3 | PMM1       | 8291882..8 phosphomannomutase         | orf19.2937   | 8112 IPF8110     | No significant S.c. match                                                                                                      |
| CA2199 | 1.0 | 1.0 | 1.0 | IPF8113    | complemer unknown function            | orf19.2938   | 8113 CaPMM1      | C-compour isomerase activity                                                                                                   |
| CA2200 | 1.0 | 1.0 | 0.9 | IPF8114    | 8295006..8 unknown function           | orf19.2939   | 8114 IPF8113     | UNCLASSI molecular_function unknown                                                                                            |
| CA2201 | 0.9 | 1.0 | 1.1 | BOS1       | 8295935..8 ER-to-Golgi v-SNARE        | orf19.2940   | 19943 IPF8114    | UNCLASSI molecular_function unknown                                                                                            |
| CA2202 | 0.9 | 0.9 | 0.9 | SCW4       | 8298078..8 cell wall glucanase (by    | orf19.2941   | 8122 CaBOS1      | CELLULAF transporter activity                                                                                                  |
| CA2203 | 0.9 | 0.9 | 0.8 | DIP51.3F   | complemer dicarboxylic amino acid     | orf19.2942   | 8123 CaSCW4      | CLASSIFICATION NOT YET CLEAR-CUT                                                                                               |
| CA2204 | 0.8 | 1.0 | 0.7 | DIP51.5F   | complemer dicarboxylic amino acid     | orf19.2943   | 10236 CaDIP51.3  | Amino acid transporter activity                                                                                                |
| CA2205 | 0.8 | 0.5 | 1.0 | SEO2       | complemer suppressor of sulfoxyd      | orf19.8319   | 12176 CaDIP51.5  | Amino acid metabolism SUBCELLULAR LOCALISATION TRANSPORT FACILITATION                                                          |
| CA2206 | 0.8 | 1.0 | 0.8 | IPF12173   | 8311220..8 unknown function           | orf19.698    | 12173 CaSEO2     | TRANSPO transporter activity                                                                                                   |
| CA2207 | 1.1 | 1.0 | 1.0 | IPF12169   | complemer unknown function            | orf19.8316   | 12169 IPF12173   | UNCLASSI molecular_function unknown                                                                                            |
| CA2208 | 1.0 | 1.0 | 0.9 | IPF17255   | complemer similar to Saccharomy       | orf19.696    | 17255 IPF12169   | UNCLASSI molecular_function unknown                                                                                            |
| CA2209 | 0.8 | 0.8 | 0.6 | IPF18512   | 8327154..8 unknown function           | orf19.695    | 18512 IPF17255   | CELLULAF signal transducer activity                                                                                            |
| CA2210 | 1.1 | 1.0 | 1.1 | MSL1       | complemer U2 snRNA-associated         | orf19.4748   | 13925 IPF18512   | CELLULAF enzyme regulator activity                                                                                             |
| CA2211 | 1.0 | 1.1 | 1.0 | IPF13921   | 8337732..8 Unknown function           | orf19.4749   | 13921 CaMSL1     | TRANSCR RNA binding                                                                                                            |
| CA2212 | 1.0 | 1.0 | 1.0 | IPF13919   | complemer unknown function            | orf19.4750   | 13919 IPF13921   | Lipid fatty-acid and isoprenoid metabolism """"PROTEIN FATE [folding modification destination] ""CELLULAR TRANSPORT AND TRANSP |
| CA2213 | 1.1 | 1.0 | 1.0 | IPF16405   | 8342422..8 similar to saccharomyc     | orf19.4751   | 16405 IPF13919   | UNCLASSIFIED PROTEINS                                                                                                          |
| CA2214 | 1.1 | 1.3 | 1.0 | IPF9939    | complemer similar to Saccharomy       | orf19.4752   | 9939 IPF16405    | UNCLASSI structural molecule activity                                                                                          |
| CA2215 | 0.9 | 1.0 | 0.8 | PFK26      | 8352093..8 6-phosphofructose-2-k      | orf19.4753   | 9943 IPF9939     | C-compour DNA binding                                                                                                          |
| CA2216 | 0.7 | 1.0 | 0.7 | IPF6235    | 8359756..8 Candida albicans Tca2      | orf19.5372   | 6235 CaPFK26     | C-compour transferase activity                                                                                                 |
| CA2217 | 0.6 | 0.5 | 1.0 | POL0       | 8360866..8 pol polyprotein, revers    | orf19.5373   | 6237 IPF6235     | No significant S.c. match                                                                                                      |
| CA2218 | 0.9 | 1.0 | 1.0 | IPF18508   | complemer unknown function            | orf19.5375   | 18508 CaPOL0     | UNCLASSIFIED PROTEINS                                                                                                          |
| CA2219 | 1.0 | 1.0 | 1.0 | CAT8       | complemer transcription factor invr   | orf19.1256   | 9674 IPF18508    | No significant S.c. match                                                                                                      |
| CA2220 | 1.1 | 1.0 | 1.0 | NTG1       | 8371878..8 endonuclease III-like      | g orf19.5098 | 9671 CaCAT8      | C-compour transcription regulator activity                                                                                     |
| CA2221 | 1.1 | 1.2 | 1.0 | IPF9670    | complemer membrane transporter        | orf19.5100   | 9670 CaNTG1      | CELL CYC DNA binding                                                                                                           |
| CA2222 | 1.0 | 1.0 | 0.9 | CCR4       | 8379374..8 glucose-repressible alc    | orf19.5101   | 13962 IPF9670    | CELL RESCUE DEFENSE AND VIRULENCE ""TRANSPORT FACILITATION                                                                     |
| CA2223 | 1.1 | 1.2 | 1.0 | PLB5       | complemer putative phospholipase      | orf19.1256   | 13965 CaCCR4     | Amino acid RNA binding                                                                                                         |
| CA2224 | 1.0 | 1.0 | 0.9 | UGA6.3EO   | 8387122..8 GABA-specific transport    | protein, 3   | 19944 CaPLB5     | Lipid fatty-acid and isoprenoid metabolism ""Other virulence attributes                                                        |
| CA2225 | 1.2 | 0.7 | 1.1 | SUR2       | 8389970..8 Hydroxylation of C-4 ol    | orf19.5818   | 5688 CaUGA6.3    | No significant S.c. match                                                                                                      |
| CA2226 | 0.9 | 0.9 | 1.0 | BET3.EXO   | 8391526..8 targeting and fusion of    | orf19.5817   | 5686 CaSUR2      | Lipid fatty-ε oxidoreductase activity                                                                                          |
| CA2227 | 0.9 | 1.0 | 0.9 | EBP7       | complemer NADPH DEHYDROGE             | orf19.5816   | 5684 CaBET3.e    | CELLULAF molecular_function unknown                                                                                            |
| CA2228 | 1.0 | 0.9 | 1.0 | SCT12      | 8394867..8 Suppresses a choline-      | orf19.5815   | 5683 CaEBP7      | ENERGY                                                                                                                         |
| CA2229 | 0.9 | 0.9 | 0.9 | IPF5682    | 8397606..8 unknown function           | orf19.5814   | 5682 CaSCT12     | TRANSPORT FACILITATION                                                                                                         |
| CA2230 | 1.0 | 1.0 | 1.0 | IPF10936   | 8403208..8 unknown function           | orf19.3928   | 10936 IPF5682    | No significant S.c. match                                                                                                      |
| CA2231 | 1.0 | 1.0 | 1.0 | IPF10934   | complemer similar to Saccharomy       | orf19.3926   | 10934 IPF10936   | TRANSCRIPTION SUBCELLULAR LOCALISATION                                                                                         |
| CA2232 | 1.0 | 1.0 | 1.1 | IPF10929   | 8406777..8 unknown function           | orf19.3925   | 10929 IPF10934   | Nucleotide RNA binding                                                                                                         |
| CA2233 | 1.1 | 1.0 | 1.1 | IFJ3       | 8409384..8 unknown function           | orf19.3924   | 10924 IPF10929   | CELL CYCLE AND DNA PROCESSING CELL FATE SUBCELLULAR LOCALISATION                                                               |
| CA2234 | 1.1 | 1.0 | 1.0 | IPF10922   | 8411631..8 unknown function           | orf19.3923   | 10922 CalFJ3     | UNCLASSIFIED PROTEINS                                                                                                          |
| CA2235 | 0.8 | 0.7 | 1.0 | MPD1       | complemer disulfide isomerase rel.    | orf19.3920   | 12689 IPF10922   | No significant S.c. match                                                                                                      |
| CA2236 | 1.0 | 1.2 | 1.0 | IFA23      | 8417177..8 unknown function           | orf19.3919   | 12694 CaMPD1     | PROTEIN I oxidoreductase activity,isomerase activity                                                                           |
| CA2237 | 0.9 | 1.0 | 0.9 | IPF10032.3 | complemer unknown function, 3-pr      | orf19.3917   | 12695 CalFA23    | CELL CYCLE AND DNA PROCESSING SUBCELLULAR LOCALISATION                                                                         |
| CA2238 | 1.0 | 0.9 | 1.1 | IPF10032.5 | complemer unknown function, 5-pr      | orf19.3916   | 10032 IPF10032.3 | TRANSCRIPTION SUBCELLULAR LOCALISATION                                                                                         |
| CA2240 | 1.0 | 1.0 | 1.1 | CRD2       | 8423295..8 Cu-binding metallothionein |              | 17996 IPF10032.5 | UNCLASSI molecular_function unknown                                                                                            |

|        |     |     |     |            |                                                 |                 |                                                                                             |
|--------|-----|-----|-----|------------|-------------------------------------------------|-----------------|---------------------------------------------------------------------------------------------|
| CA2241 | 1.0 | 1.0 | 1.1 | IFQ1.3F    | complemer Unknown function, 3-p orf19.4674      | 7422 CaCRD2     | No significant S.c. match                                                                   |
| CA2242 | 1.1 | 1.0 | 1.1 | IFQ1.5F    | complemer Unknown function, 5-p orf19.4673      | 7421 CaIFQ1.3f  | No significant S.c. match                                                                   |
| CA2243 | 0.9 | 1.1 | 1.0 | IPF7414    | 8431030..8 putative transcription f:orf19.4670  | 7414 CaIFQ1.5f  | No significant S.c. match                                                                   |
| CA2244 | 0.0 | 0.0 | 0.3 | AAT22      | complemer aspartate aminotransferase orf19.4669 | 7410 IPF7414    | C-compound and carbohydrate metabolism TRANSCRIPTION                                        |
| CA2245 | 1.0 | 0.9 | 1.0 | IPF7409    | complemer unknown function orf19.4668           | 7409 CaAAT22    | Amino acid metabolism Nitrogen and sulphur metabolism SUBCELLULAR LOCALISATION              |
| CA2246 | 0.9 | 1.0 | 1.1 | IPF7405    | complemer unknown function orf19.4666           | 7405 IPF7409    | C-compound and carbohydrate metabolism SUBCELLULAR LOCALISATION                             |
| CA2247 | 1.1 | 1.0 | 1.0 | IPF7404    | complemer unknown function orf19.1213           | 7404 IPF7405    | No significant S.c. match                                                                   |
| CA2248 | 1.0 | 1.1 | 1.0 | IPF11469   | 8445367..8 unknown function orf19.9902          | 11469 IPF7404   | No significant S.c. match                                                                   |
| CA2249 | 0.9 | 0.9 | 1.0 | POL2       | complemer DNA-directed DNA pol orf19.2365       | 14265 IPF11469  | No significant S.c. match                                                                   |
| CA2250 | 1.1 | 1.2 | 1.1 | MIS11      | 8455731..8 mitochondrial C1-tetral orf19.2364   | 12851 CaPOL2    | CELL CYC nucleotidyltransferase activity                                                    |
| CA2251 | 1.0 | 0.9 | 1.0 | IPF12845   | 8459213..8 unknown function orf19.2363          | 12845 CaMIS11   | Amino acid ligase activity                                                                  |
| CA2252 | 1.0 | 1.0 | 1.0 | IPF12844   | complemer unknown function orf19.9898           | 12844 IPF12845  | PROTEIN I molecular_function unknown                                                        |
| CA2253 | 1.0 | 1.0 | 1.0 | IPF15485   | 8469219..8 unknown function orf19.1959          | 15485 IPF12844  | UNCLASSI molecular_function unknown                                                         |
| CA2254 | 1.0 | 1.0 | 1.1 | IPF15487   | 8470616..8 unknown function orf19.1958          | 15487 IPF15485  | UNCLASSI molecular_function unknown                                                         |
| CA2255 | 0.9 | 1.1 | 0.9 | CYC3       | 8477757..8 cytochrome C heme ly:orf19.1957      | 13303 IPF15487  | No significant S.c. match                                                                   |
| CA2256 | 1.1 | 0.9 | 1.0 | IPF14757   | complemer unknown function orf19.1956           | 14757 CaCYC3    | Metabolism lyase activity                                                                   |
| CA2257 | 1.0 | 1.0 | 1.0 | SHR5       | 8481948..8 RAS suppressor (by h)orf19.1955      | 14758 IPF14757  | UNCLASSI molecular_function unknown                                                         |
| CA2258 | 0.9 | 1.0 | 1.0 | IFR1       | 8486422..8 Unknown function orf19.1763          | 17956 CaSHR5    | Nucleotide transferase activity                                                             |
| CA2259 | 1.0 | 0.9 | 1.1 | IPF6845    | complemer unknown function orf19.1762           | 6845 CaIFR1     | SUBCELLULAR LOCALISATION                                                                    |
| CA2260 | 1.1 | 1.0 | 1.0 | OST2       | 8488973..8 Oligosaccharyltransferase orf19.1761 | 6848 IPF6845    | UNCLASSI protein phosphatase activity                                                       |
| CA2261 | 0.9 | 1.0 | 0.9 | RAS1       | complemer GTP-binding protein (b)orf19.1760     | 6849 CaOST2     | C-compound transferase activity                                                             |
| CA2262 | 1.0 | 1.0 | 1.0 | IPF6857    | 8495988..8 putative transcriptional orf19.1757  | 6857 CaRAS1     | Nucleotide hydrolase activity                                                               |
| CA2263 | 1.1 | 1.1 | 1.2 | GPD1       | 8500901..8 Glycerol-3-phosphate orf19.1756      | 6860 IPF6857    | Amino acid DNA binding                                                                      |
| CA2265 | 0.9 | 1.1 | 1.0 | CMK2       | complemer Ca2+/calmodulin-depe orf19.1754       | 6866 CaGPD1     | C-compound oxidoreductase activity                                                          |
| CA2266 | 1.0 | 1.0 | 1.0 | HEM1       | 8508965..8 5-aminolevulinic acid s orf19.1013   | 2755 CaCMK2     | CELLULAF protein kinase activity                                                            |
| CA2267 | 1.0 | 1.1 | 1.0 | IFU1.5F    | 8511139..8 Unknown function, 5-p orf19.2600     | 2757 CaHEM1     | Metabolism transferase activity                                                             |
| CA2268 | 1.0 | 1.1 | 1.0 | IFU1.3F    | 8513229..8 Unknown function, 3-prime end        | 18497 CaFU1.5f  | CELL CYC structural molecule activity                                                       |
| CA2269 | 1.0 | 0.9 | 1.0 | YOR100     | 8514491..8 Putative mitochondrial orf19.2599    | 2761 CaFU1.3f   | No significant S.c. match                                                                   |
| CA2270 | 1.3 | 1.0 | 0.8 | VMA4       | 8515783..8 H+-transporting ATPase orf19.2598    | 2763 CaYOR100   | CELLULAF transporter activity                                                               |
| CA2271 | 1.0 | 1.1 | 1.0 | MRS2       | 8516787..8 Mitochondrial RNA spli orf19.2597    | 2765 CaVMA4     | PROTEIN I transporter activity                                                              |
| CA2272 | 1.0 | 1.0 | 0.9 | RPA43      | complemer DNA-directed RNA pol orf19.2594       | 19945 CaMRS2    | TRANSCR transporter activity                                                                |
| CA2273 | 1.0 | 1.0 | 1.0 | BIO2       | 8520374..8 biotin synthetase (by h)orf19.2593   | 2771 CaRPA43    | TRANSCR nucleotidyltransferase activity                                                     |
| CA2274 | 1.0 | 1.0 | 1.0 | BIO3       | complemer DAPA aminotransferase orf19.2591      | 2774 CaBIO2     | Metabolism transferase activity                                                             |
| CA2275 | 1.0 | 1.0 | 1.0 | BIO4       | 8523604..8 dethiobiotin synthetase orf19.2590   | 2776 CaBIO3     | Metabolism transferase activity                                                             |
| CA2276 | 1.0 | 1.1 | 1.0 | HNM3       | 8524466..8 Choline permease (by orf19.2587      | 2781 CaBIO4     | Metabolism ligase activity                                                                  |
| CA2277 | 1.0 | 1.0 | 0.9 | DRS21      | complemer Membrane-spanning Corf19.783          | 10810 CaHNM3    | CELLULAR TRANSPORT AND TRANSPORT MECHANISMS SUBCELLULAR LOCALISATION TRANSPORT FACILITATION |
| CA2278 | 1.0 | 0.9 | 1.0 | IPF10806   | 8533188..8 unknown function orf19.782           | 10806 CaDRS21   | TRANSCO transporter activity                                                                |
| CA2279 | 1.0 | 0.9 | 1.0 | DUR31      | 8536333..8 Urea transport protein orf19.781     | 10804 IPF10806  | Lipid fatty- $\epsilon$ molecular_function unknown                                          |
| CA2280 | 1.1 | 1.0 | 1.1 | DUR1,2     | 8539570..8 urea amidolyase (by h)orf19.780      | 9766 CaDUR31    | REGULATI transporter activity                                                               |
| CA2281 | 1.0 | 0.9 | 0.9 | HAT1       | 8545321..8 histone acetyltransferase orf19.779  | 9767 CaDUR1,2   | Amino acid hydrolase activity, ligase activity                                              |
| CA2282 | 1.0 | 0.9 | 1.0 | IPF14438   | 8548850..8 unknown function orf19.1299          | 12637 CaHAT1    | PROTEIN I transferase activity                                                              |
| CA2283 | 1.1 | 1.0 | 1.0 | MRT4       | 8549818..8 required for mRNA dec orf19.1299     | 12634 IPF14438  | No significant S.c. match                                                                   |
| CA2284 | 0.9 | 0.9 | 1.0 | MIF2       | complemer required for normal chr orf19.5551    | 12632 CaMRT4    | Nucleotide molecular_function unknown                                                       |
| CA2285 | 1.0 | 0.9 | 1.0 | IPF12629   | complemer unknown function orf19.5552           | 12629 CaMIF2    | CELL CYC DNA binding                                                                        |
| CA2286 | 1.0 | 0.9 | 0.9 | IPF5369    | 8555844..8 unknown function orf19.5553          | 5369 IPF12629   | UNCLASSI molecular_function unknown                                                         |
| CA2287 | 0.9 | 1.0 | 1.0 | IPF5373    | complemer unknown function orf19.5555           | 5373 IPF5369    | UNCLASSI molecular_function unknown                                                         |
| CA2288 | 1.0 | 0.9 | 1.0 | IPF5376    | 8563102..8 unknown function orf19.5557          | 5376 IPF5373    | C-compound and carbohydrate metabolism SUBCELLULAR LOCALISATION                             |
| CA2289 | 1.2 | 1.1 | 1.1 | RBF1.3     | complemer RPG-BOX-BINDING F orf19.1300          | 5380 IPF5376    | PROTEIN FATE [folding modification destination]                                             |
| CA2290 | 0.9 | 0.9 | 0.9 | IPF16300   | complemer putative aldehyde dehy orf19.742      | 16300 CaRBF1.3  | No significant S.c. match                                                                   |
| CA2291 | 1.1 | 1.4 | 1.4 | IPF9740    | complemer oligo-1,4 -1,4-glucanase orf19.744    | 9743 IPF16300   | CLASSIFICATION NOT YET CLEAR-CUT                                                            |
| CA2292 | 0.8 | 1.0 | 0.8 | VAC8       | 8585630..8 required for vacuole inl orf19.745   | 9747 IPF9740    | C-compound transferase activity                                                             |
| CA2293 | 0.9 | 0.9 | 0.9 | IPF9748    | complemer unknown function orf19.746            | 9748 CaVAC8     | PROTEIN I protein binding                                                                   |
| CA2294 | 1.0 | 0.9 | 1.0 | IPF19946   | complemer similar to Saccharomy orf19.747       | 19946 IPF9748   | UNCLASSI molecular_function unknown                                                         |
| CA2295 | 1.0 | 1.0 | 1.1 | HOS2       | complemer putative histone deace orf19.5377     | 8228 IPF19946   | SUBCELLUL hydrolase activity                                                                |
| CA2296 | 1.1 | 1.0 | 1.0 | SCL1       | 8601515..8 Proteasome subunit Y orf19.5378      | 8226 CaHOS2     | CELL CYC hydrolase activity                                                                 |
| CA2297 | 1.1 | 1.0 | 0.9 | ERG4       | complemer sterol C-24 reductase (orf19.5379     | 8225 CaSCL1     | PROTEIN I peptidase activity                                                                |
| CA2298 | 0.9 | 0.9 | 1.0 | IPF8224    | complemer unknown function orf19.5380           | 8224 CaERG4     | Lipid fatty- $\epsilon$ oxidoreductase activity                                             |
| CA2299 | 1.1 | 1.0 | 1.0 | IPF8222    | complemer unknown function orf19.5381           | 8222 IPF8224    | Amino acid metabolism TRANSCRIPTION SUBCELLULAR LOCALISATION UNCLASSIFIED PROTEINS          |
| CA2300 | 1.0 | 1.9 | 1.0 | PMA1       | complemer plasma membrane H+-orf19.5383         | 8215 IPF8222    | TRANSCR RNA binding                                                                         |
| CA2302 | 1.1 | 0.9 | 1.2 | IPF6518    | 8629553..8 unknown function orf19.1691          | 6518 CaPMA1     | REGULATI transporter activity                                                               |
| CA2303 | 1.3 | 1.6 | 1.3 | TOS1       | complemer putative Anchor subun orf19.1690      | 6517 IPF6518    | UNCLASSIFIED PROTEINS                                                                       |
| CA2304 | 0.9 | 1.0 | 1.0 | PRP43      | 8636365..8 RNA-dependent ATPase orf19.1687      | 6512 CaTOS1     | UNCLASSI molecular_function unknown                                                         |
| CA2305 | 1.0 | 0.9 | 1.0 | MPA43      | 8639114..8 Unknown function orf19.1686          | 6511 CaPRP43    | TRANSCR RNA binding, helicase activity                                                      |
| CA2306 | 1.0 | 0.9 | 1.0 | IPF6510    | 8641469..8 unknown function orf19.1685          | 6510 CaMPA43    | UNCLASSI molecular_function unknown                                                         |
| CA2307 | 1.0 | 0.9 | 0.9 | IPF18488.f | 8642940..8 unknown function, 5-prime end        | 18488 IPF6510   | TRANSCRIPTION SUBCELLULAR LOCALISATION                                                      |
| CA2308 | 1.0 | 0.9 | 1.0 | IPF9874.3  | 8649277..8 similar to Saccharomy orf19.8953     | 9874 IPF18488.f | No significant S.c. match                                                                   |
| CA2309 | 0.9 | 1.0 | 1.0 | IPF9875    | complemer unknown function orf19.1374           | 9875 IPF9874.3  | Lipid fatty- $\epsilon$ hydrolase activity                                                  |
| CA2310 | 1.0 | 1.1 | 1.0 | LEU42      | complemer 2-isopropylmalalate sy orf19.1375     | 9877 IPF9875    | PROTEIN FATE [folding modification destination]                                             |
| CA2311 | 0.9 | 1.0 | 1.1 | SSO2       | complemer syntaxin (by homology orf19.1376      | 16993 CaLEU42   | Amino acid metabolism SUBCELLULAR LOCALISATION                                              |
| CA2312 | 1.0 | 1.0 | 1.0 | IPF16498   | 8658174..8 similar to Saccharomy orf19.1377     | 16498 CaSSO2    | CELLULAF transporter activity                                                               |
| CA2313 | 1.0 | 1.0 | 1.0 | ERF3       | complemer translation release fact orf19.1378   | 19754 IPF16498  | Amino acid transferase activity                                                             |
| CA2314 | 0.6 | 0.6 | 0.7 | IPF14545   | 8662058..8 unknown function orf19.1381          | 14545 CaERF3    | CELL CYC translation regulator activity                                                     |

|        |     |     |     |            |                                                 |       |            |                                                                                                  |
|--------|-----|-----|-----|------------|-------------------------------------------------|-------|------------|--------------------------------------------------------------------------------------------------|
| CA2315 | 0.9 | 1.0 | 1.0 | YEA4       | complemer Golgi uridine diphosph.orf19.8962     | 14544 | IPF14545   | SUBCELLL molecular_function unknown                                                              |
| CA2316 | 0.9 | 0.9 | 1.0 | IPF14542   | 8664812..8 unknown function orf19.8963          | 14542 | CaYEA4     | C-compour transporter activity                                                                   |
| CA2317 | 0.9 | 1.0 | 1.0 | IPF13586   | complemer unknown function orf19.5479           | 13586 | IPF14542   | No significant S.c. match                                                                        |
| CA2318 | 1.0 | 1.0 | 1.0 | ILV1       | 8672919..8 Threonine dehydratase orf19.5480     | 16147 | IPF13586   | No significant S.c. match                                                                        |
| CA2319 | 1.0 | 1.0 | 1.0 | GUF1       | complemer GTP-binding protein (b orf19.5483     | 19755 | CaLV1      | Amino acid lyase activity                                                                        |
| CA2320 | 1.1 | 1.1 | 1.0 | SER1       | complemer phosphoserine transan orf19.5484      | 10985 | CaGUF1     | PROTEIN :hydrolase activity                                                                      |
| CA2321 | 0.9 | 1.0 | 1.0 | MEC3       | complemer G2-specific checkpoint orf19.5485     | 10984 | CaSER1     | Amino acid transferase activity                                                                  |
| CA2322 | 0.8 | 0.9 | 0.9 | YSH1       | 8679334..8 component of pre-mRN orf19.5486      | 10981 | CaMEC3     | CELL CYC DNA binding                                                                             |
| CA2323 | 0.8 | 0.9 | 0.9 | SMD2       | 8682305..8 U1 snRNP protein of the Sm class     | 10980 | CaYSH1     | TRANSCR RNA binding                                                                              |
| CA2324 | 1.1 | 1.0 | 1.0 | CDC46      | complemer cell division control pro orf19.5487  | 10979 | CaSMD2     | TRANSCR RNA binding                                                                              |
| CA2325 | 1.0 | 0.9 | 0.9 | IPF10977   | 8685237..8 unknown function orf19.5488          | 10977 | CaCDC46    | CELL CYC DNA binding                                                                             |
| CA2326 | 1.0 | 1.0 | 1.0 | NUBM       | 8689792..8 nucleotide-binding resq orf19.1197   | 4781  | IPF10977   | CLASSIFIC molecular_function unknown                                                             |
| CA2327 | 1.0 | 1.0 | 1.1 | IPF4782    | 8692371..8 probable membrane pr orf19.1197;     | 4782  | CaNUBM     | No significant S.c. match                                                                        |
| CA2328 | 1.0 | 1.0 | 1.0 | MED8       | complemer transcriptional regulatiorf19.1197;   | 4783  | IPF4782    | UNCLASSI molecular_function unknown                                                              |
| CA2329 | 1.1 | 1.1 | 1.1 | IPF4784    | 8694636..8 unknown Function orf19.4498          | 4784  | CaMED8     | TRANSCR transcription regulator activity                                                         |
| CA2330 | 0.9 | 0.8 | 1.0 | RIM2       | complemer mitochondrial carrier pi orf19.4499   | 4785  | IPF4784    | No significant S.c. match                                                                        |
| CA2331 | 1.0 | 1.0 | 1.0 | MOT1       | complemer transcriptional accesscorf19.4502     | 4789  | CaRIM2     | ENERGY C transporter activity                                                                    |
| CA2332 | 1.2 | 1.0 | 1.1 | IPF4792    | complemer unknown Function orf19.1197;          | 4792  | CaMOT1     | TRANSCR hydrolase activity                                                                       |
| CA2333 | 0.9 | 0.9 | 0.9 | ADH4       | complemer probable alcohol dehyco orf19.1198;   | 4794  | IPF4792    | No significant S.c. match                                                                        |
| CA2334 | 0.9 | 1.0 | 1.0 | ADH3       | complemer probable alcohol dehyco orf19.1198    | 4795  | CaADH4     | C-compound and carbohydrate metabolism ENERGY SUBCELLULAR LOCALISATION UNCLASSIFIED PROTEINS     |
| CA2335 | 1.0 | 1.0 | 1.1 | LYS21      | complemer homocitrate synthase ( orf19.1198;    | 18482 | CaADH3     | C-compound and carbohydrate metabolism ENERGY SUBCELLULAR LOCALISATION UNCLASSIFIED PROTEINS     |
| CA2336 | 1.0 | 1.0 | 1.1 | IPF13383.€ | complemer unknown function, inte orf19.2353     | 13383 | CaLYS21    | Amino acid metabolism C-compound and carbohydrate metabolism SUBCELLULAR LOCALISATION            |
| CA2337 | 1.0 | 1.0 | 1.0 | IPF13379   | 8716095..8 unknown function orf19.2352          | 13379 | IPF13383.€ | UNCLASSI molecular_function unknown                                                              |
| CA2338 | 1.0 | 0.9 | 1.0 | NIT3       | complemer nitrilase (by homology) orf19.2351    | 13378 | IPF13379   | UNCLASSI molecular_function unknown                                                              |
| CA2339 | 1.0 | 1.1 | 1.0 | IPF13377   | complemer unknown function orf19.2350           | 13377 | CaNIT3     | Nitrogen ar hydrolase activity                                                                   |
| CA2340 | 0.9 | 0.9 | 1.0 | MNN5       | complemer Golgi alpha-1,2-mannco orf19.2347     | 15847 | IPF13377   | CELL RESCUE DEFENSE AND VIRULENCE ""TRANSPORT FACILITATION                                       |
| CA2341 | 1.0 | 1.0 | 1.0 | IPF13838   | 8723633..8 unknown function orf19.2346          | 13838 | CaMNN5     | CELL FATE                                                                                        |
| CA2342 | 1.5 | 1.5 | 1.5 | IPF13836   | complemer probable heat shock pr orf19.2344     | 13836 | IPF13838   | UNCLASSI molecular_function unknown                                                              |
| CA2343 | 1.0 | 0.9 | 1.1 | IPF8671    | 8728909..8 unknown function orf19.2343          | 8671  | IPF13836   | No significant S.c. match                                                                        |
| CA2344 | 1.0 | 1.0 | 1.0 | SFT2       | 8730585..8 similar to Saccharomyco orf19.2342   | 8674  | IPF8671    | PROTEIN I protein binding                                                                        |
| CA2345 | 1.0 | 1.0 | 1.1 | HNT1       | complemer similarity to protein kin. orf19.2341 | 8675  | CaSFT2     | SUBCELLL molecular_function unknown                                                              |
| CA2346 | 0.9 | 0.9 | 1.0 | SEF1       | complemer Putative transcription fi orf19.3753  | 7790  | CaHNT1     | Nucleotide hydrolase activity                                                                    |
| CA2347 | 1.0 | 1.1 | 1.0 | RAD51      | complemer DNA repair protein by l orf19.3752    | 7787  | CaSEF1     | TRANSCR molecular_function unknown                                                               |
| CA2348 | 1.3 | 1.2 | 1.2 | IPF12811   | 8745975..8 putative serine/threonii orf19.3751  | 12811 | CaRAD51    | CELL CYC DNA binding                                                                             |
| CA2349 | 0.9 | 1.1 | 1.0 | IFC3       | complemer Unknown function orf19.3749           | 12812 | IPF12811   | CLASSIFIC protein kinase activity                                                                |
| CA2350 | 0.9 | 0.9 | 1.0 | CWH41.5E   | complemer ER glucosidase I, 5-pri orf19.4421    | 15907 | CaIFC3     | TRANSPO transporter activity                                                                     |
| CA2351 | 1.0 | 0.9 | 0.9 | IPF19947   | 8754287..8 unknown function orf19.4420          | 19947 | CaCWH41    | C-compound and carbohydrate metabolism CONTROL OF CELLULAR ORGANIZATION SUBCELLULAR LOCALISATION |
| CA2352 | 0.9 | 0.9 | 0.9 | FMT1       | 8757080..8 Methionyl-tRNA Transi orf19.4418     | 6482  | IPF19947   | TRANSCR transcription regulator activity                                                         |
| CA2353 | 1.0 | 1.0 | 1.0 | VPS13      | complemer involved in regulating r orf19.4416   | 19756 | CaFMT1     | TRANSCR transferase activity                                                                     |
| CA2354 | 1.1 | 0.9 | 1.0 | IPF18480   | complemer unknown function orf19.1189;          | 18480 | CaVPS13    | PROTEIN I molecular_function unknown                                                             |
| CA2355 | 0.9 | 0.8 | 0.9 | TPK1       | complemer cAMP-dependent prote orf19.1235       | 12285 | IPF18480   | No significant S.c. match                                                                        |
| CA2356 | 0.8 | 0.8 | 0.8 | IPF12282   | complemer unknown function orf19.4893           | 12282 | CaTPK1     | TRANSCRIPTION REGULATION OF/INTERACTION WITH CELLULAR ENVIRONMENT                                |
| CA2357 | 0.9 | 0.7 | 1.0 | IPF8957    | complemer unknown function orf19.4894           | 8957  | IPF12282   | No significant S.c. match                                                                        |
| CA2358 | 1.1 | 1.1 | 1.1 | IPF8953    | complemer unknown function orf19.4895           | 8953  | IPF8957    | UNCLASSI molecular_function unknown                                                              |
| CA2359 | 0.7 | 0.5 | 0.7 | IPF8952    | complemer similar to Saccharomyco orf19.4896    | 8952  | IPF8953    | No significant S.c. match                                                                        |
| CA2360 | 1.1 | 1.0 | 1.0 | IPF8951    | complemer unknown function orf19.4897           | 8951  | IPF8952    | TRANSCR nucleotidyltransferase activity                                                          |
| CA2361 | 0.8 | 0.9 | 1.8 | IPF8950    | complemer unknown function orf19.1236;          | 8950  | IPF8951    | Lipid fatty-z transporter activity                                                               |
| CA2362 | 0.5 | 0.4 | 0.5 | IPF10595   | 8796680..8 unknown function orf19.1287          | 10595 | IPF8950    | UNCLASSI molecular_function unknown                                                              |
| CA2363 | 0.9 | 0.9 | 0.9 | IPF10590   | 8804440..8 unknown function orf19.1285          | 10590 | IPF10595   | No significant S.c. match                                                                        |
| CA2364 | 1.0 | 0.9 | 1.0 | MEC1       | complemer cell cycle checkpoint p orf19.8870    | 19757 | IPF10590   | UNCLASSI molecular_function unknown                                                              |
| CA2365 | 0.9 | 0.9 | 0.9 | CKS1       | complemer cyclin-dependent kinas orf19.1282     | 10371 | CaMEC1     | CELL CYC transferase activity                                                                    |
| CA2366 | 1.0 | 1.0 | 1.0 | IPF10373   | complemer unknown function orf19.1281           | 10373 | CaCKS1     | CELL CYC enzyme regulator activity                                                               |
| CA2367 | 1.0 | 1.4 | 1.3 | SUI1       | complemer translation initiation fac orf19.8867 | 10374 | IPF10373   | UNCLASSI molecular_function unknown                                                              |
| CA2368 | 0.8 | 1.0 | 1.0 | RPA190     | 8820119..8 DNA-directed RNA pol orf19.1839      | 10842 | CaSUI1     | PROTEIN t translation regulator activity                                                         |
| CA2369 | 1.1 | 1.1 | 1.0 | TBP1       | complemer TATA-binding protein orf19.1837       | 10845 | CaRPA190   | TRANSCR nucleotidyltransferase activity                                                          |
| CA2370 | 1.0 | 0.9 | 0.9 | APN2       | complemer AP endonuclease, exo orf19.1836       | 10847 | CaTBP1     | TRANSCR DNA binding                                                                              |
| CA2371 | 1.0 | 1.0 | 1.0 | IPF10333   | 8830210..8 unknown function orf19.1835          | 10333 | CaAPN2     | CELL CYC hydrolase activity                                                                      |
| CA2372 | 0.9 | 1.0 | 1.0 | IPF10335   | 8832527..8 unknown function orf19.1834          | 10335 | IPF10333   | CELL FATI protein binding                                                                        |
| CA2373 | 1.0 | 1.0 | 1.0 | CBF5       | complemer centromere/ microtubu orf19.1833      | 10336 | IPF10335   | CELLULAR TRANSPORT AND TRANSPORT MECHANISMS SUBCELLULAR LOCALISATION                             |
| CA2374 | 1.0 | 1.0 | 1.0 | FCY23      | complemer Putative purine-cytosin orf19.9390    | 10337 | CaCBF5     | CELL CYC lyase activity                                                                          |
| CA2375 | 1.0 | 1.0 | 1.0 | IPF15504   | complemer unknown function orf19.2211           | 15504 | CaFCY23    | Nucleotide transporter activity                                                                  |
| CA2376 | 1.0 | 0.9 | 1.1 | IPF15506   | complemer unknown function orf19.2213           | 15506 | IPF15504   | UNCLASSI molecular_function unknown                                                              |
| CA2377 | 1.2 | 0.9 | 1.0 | MRPL7      | complemer Ribosomal protein of t orf19.2214     | 15259 | IPF15506   | UNCLASSI molecular_function unknown                                                              |
| CA2378 | 0.9 | 1.0 | 0.9 | GLE1       | 8849231..8 RNA export mediator ( orf19.2215     | 15261 | CaMRPL7    | PROTEIN t structural molecule activity                                                           |
| CA2379 | 1.1 | 0.9 | 0.9 | IPF4073    | complemer similar to Saccharomyco orf19.2216    | 4073  | CaGLE1     | TRANSCR molecular_function unknown                                                               |
| CA2380 | 1.0 | 1.1 | 1.0 | IPF4072    | 8855132..8 unknown function orf19.2217          | 4072  | IPF4073    | CELL CYC structural molecule activity                                                            |
| CA2381 | 1.0 | 1.0 | 1.0 | YCK3.3F    | complemer casein kinase I, 3-prim orf19.2221    | 11642 | IPF4072    | No significant S.c. match                                                                        |
| CA2383 | 1.0 | 0.9 | 1.0 | IPF18474   | complemer unknown function orf19.2615           | 18474 | CaYCK3.3F  | No significant S.c. match                                                                        |
| CA2384 | 1.0 | 0.9 | 1.0 | MDL1       | complemer ATP-DEPENDENT PE orf19.2615           | 7801  | IPF18474   | No significant S.c. match                                                                        |
| CA2385 | 1.0 | 1.0 | 1.0 | RSR1.3     | complemer GTP-binding protein, 3 orf19.2614     | 8507  | CaMDL1     | TRANSPO transporter activity                                                                     |
| CA2386 | 1.7 | 1.4 | 1.2 | ECM41.3    | complemer involved in cell wall bio orf19.2613  | 8505  | CaRSR1.3   | CELL FATI signal transducer activity                                                             |
| CA2387 | 1.1 | 1.1 | 1.2 | IPF8504    | 8879599..8 unknown function orf19.2612          | 8504  | CaECM41.3  | CONTROL molecular_function unknown                                                               |



|        |     |     |     |            |                                                 |       |            |                                                                                |
|--------|-----|-----|-----|------------|-------------------------------------------------|-------|------------|--------------------------------------------------------------------------------|
| CA2388 | 1.1 | 1.1 | 1.1 | MCM6       | complemer component of MCM ini orf19.2611       | 8502  | IPF8504    | TRANSCRIPTION SUBCELLULAR LOCALISATION                                         |
| CA2389 | 0.9 | 0.9 | 1.1 | IPF8500    | 8883552..8 unknown function orf19.2610          | 8500  | CaMCM6     | CELL CYC DNA binding                                                           |
| CA2390 | 1.0 | 1.0 | 0.9 | CET1       | 8884285..8 mRNA 5'-triphosphata:orf19.2609      | 8499  | IPF8500    | TRANSCRIPTION SUBCELLULAR LOCALISATION                                         |
| CA2391 | 2.2 | 3.6 | 1.9 | ADH5       | 8887692..8 probable alcohol dehydr orf19.2608   | 15671 | CaCET1     | TRANSCR hydrolase activity                                                     |
| CA2392 | 1.1 | 1.1 | 1.0 | IPF15672   | complemer unknown function orf19.1013i          | 15672 | CaADH5     | C-compound and carbohydrate metabolism ENERGY SUBCELLULAR LOCALISATION         |
| CA2393 | 1.0 | 1.0 | 1.0 | RHO3       | complemer GTP-binding protein of orf19.1101i    | 6422  | IPF15672   | ENERGY                                                                         |
| CA2394 | 1.0 | 1.0 | 1.1 | IPF6424    | complemer unknown function orf19.1101i          | 6424  | CaRHO3     | CELL FATI signal transducer activity                                           |
| CA2395 | 1.0 | 1.0 | 1.0 | IPF6425    | complemer unknown function orf19.3536           | 6425  | IPF6424    | UNCLASSIFIED PROTEINS                                                          |
| CA2396 | 0.9 | 1.0 | 1.0 | IPF6428    | complemer unknown function orf19.3537           | 6428  | IPF6425    | UNCLASSItransferase activity                                                   |
| CA2397 | 1.1 | 0.9 | 1.2 | CFL12      | 8896757..8 Strong similarity to ferr orf19.3538 | 6430  | IPF6428    | UNCLASSImolecular_function unknown                                             |
| CA2398 | 1.0 | 0.9 | 0.9 | IPF6431    | complemer unknown function orf19.3539           | 6431  | CaCFL12    | REGULATION OF/INTERACTION WITH CELLULAR ENVIRONMENT Other virulence attributes |
| CA2399 | 0.9 | 0.9 | 0.8 | MAK5       | 8900492..8 ATP-dependent RNA t orf19.3540       | 6433  | IPF6431    | UNCLASSImolecular_function unknown                                             |
| CA2400 | 1.0 | 1.0 | 1.0 | SUP45      | complemer Translational release f:orf19.3541    | 6434  | CaMAK5     | TRANSCR RNA binding,helicase activity                                          |
| CA2401 | 1.1 | 1.1 | 1.0 | LEM3       | 8904584..8 cell division cycle muta orf19.3542  | 6435  | CaSUP45    | PROTEIN !translation regulator activity                                        |
| CA2402 | 1.0 | 0.9 | 1.0 | IPF6437    | complemer unknown function orf19.3543           | 6437  | CaLEM3     | UNCLASSItranscription regulator activity                                       |
| CA2403 | 1.0 | 0.9 | 0.9 | IPF6438    | 8906519..8 unknown function orf19.3544          | 6438  | IPF6437    | No significant S.c. match                                                      |
| CA2405 | 1.0 | 1.0 | 1.0 | IPF3844    | 8915133..8 unknown function orf19.301           | 3844  | IPF6438    | Lipid fatty-:molecular_function unknown                                        |
| CA2406 | 0.9 | 1.0 | 0.9 | AIP2       | complemer actin interacting proteir orf19.300   | 3840  | IPF3844    | No significant S.c. match                                                      |
| CA2407 | 1.1 | 1.4 | 0.9 | ECM14      | 8920404..8 carboxypeptidase invo orf19.299      | 3838  | CaAIP2     | SUBCELLL oxidoreductase activity                                               |
| CA2408 | 1.0 | 1.1 | 1.0 | IPF3833    | complemer unknown function orf19.296            | 3833  | CaECM14    | CONTROL molecular_function unknown                                             |
| CA2409 | 0.9 | 1.0 | 1.0 | IPF19948   | 8925564..8 unknown function orf19.291           | 19948 | IPF3833    | No significant S.c. match                                                      |
| CA2411 | 0.9 | 0.9 | 0.9 | IFI3.3     | complemer Unknown function, 3-p orf19.4483      | 17915 | IPF19948   | UNCLASSImolecular_function unknown                                             |
| CA2412 | 1.0 | 1.0 | 1.0 | IPF13755   | 8932229..8 unknown function orf19.4481          | 13755 | CaIFI3.3   | CLASSIFICATION NOT YET CLEAR-CUT                                               |
| CA2413 | 0.8 | 0.8 | 0.8 | IPF13756.† | 8933487..8 unknown function, 5-pr orf19.4480    | 13756 | IPF13755   | No significant S.c. match                                                      |
| CA2414 | 1.0 | 1.1 | 0.9 | IPF13756.‡ | 8934104..8 unknown function, 3-pr orf19.4479    | 13757 | IPF13756.† | UNCLASSIFIED PROTEINS                                                          |
| CA2415 | 1.0 | 1.0 | 1.0 | MSD1       | complemer Aspartyl-IRNA synthet:orf19.4478      | 17203 | IPF13756.‡ | UNCLASSImolecular_function unknown                                             |
| CA2416 | 2.6 | 4.4 | 3.3 | IFD4       | 8938685..8 Putative aryl-alcohol de orf19.4477  | 14374 | CaMSD1     | PROTEIN !ligase activity                                                       |
| CA2418 | 1.0 | 1.0 | 0.9 | MNT4       | 8942665..8 putative mannosyltrans:orf19.4475    | 14377 | CaIFD4     | C-compound and carbohydrate metabolism ENERGY                                  |
| CA2419 | 1.0 | 0.9 | 1.1 | IPF14379   | complemer unknown function orf19.4474           | 14379 | CaMNT4     | C-compour transferase activity                                                 |
| CA2420 | 1.0 | 1.0 | 1.0 | SPC19      | complemer spindle pole body prote orf19.4473    | 15002 | IPF14379   | UNCLASSImolecular_function unknown                                             |
| CA2421 | 0.9 | 0.8 | 0.9 | IPF14998   | 8947627..8 unknown function orf19.4471          | 14998 | CaSPC19    | SUBCELLL structural molecule activity                                          |
| CA2422 | 0.9 | 0.7 | 0.9 | IPF14997   | 8950699..8 unknown function orf19.1195i         | 14997 | IPF14998   | UNCLASSImolecular_function unknown                                             |
| CA2423 | 1.0 | 1.1 | 1.0 | SDH41      | complemer succinate dehydrogen:orf19.1194i      | 19574 | IPF14997   | No significant S.c. match                                                      |
| CA2424 | 0.9 | 1.0 | 1.0 | IPF18468   | complemer unknown function orf19.1194i          | 18468 | CaSDH41    | C-compour oxidoreductase activity                                              |
| CA2425 | 1.0 | 1.1 | 1.0 | IPF9907    | 8956615..8 similar to Saccharomy orf19.1091i    | 9907  | IPF18468   | No significant S.c. match                                                      |
| CA2426 | 1.0 | 1.0 | 0.9 | IPF9901    | 8959480..8 similar to Saccharomy orf19.3407     | 9901  | IPF9907    | CELLULAF molecular_fucction unknown                                            |
| CA2427 | 1.0 | 1.0 | 1.0 | IPF9898    | complemer probable formate dehy orf19.3406      | 9898  | IPF9901    | CELL CYC DNA binding                                                           |
| CA2428 | 1.0 | 1.0 | 0.9 | IPF9894.3  | complemer unknown function, 3-pr orf19.3405     | 9894  | IPF9898    | ENERGY transporter activity                                                    |
| CA2429 | 1.0 | 1.0 | 1.0 | IPF9890    | 8965711..8 unknown function orf19.3404          | 9890  | IPF9894.3  | No significant S.c. match                                                      |
| CA2430 | 1.0 | 0.9 | 0.9 | IPF12950   | complemer unknown function orf19.3402           | 12950 | IPF9890    | UNCLASSIFIED PROTEINS                                                          |
| CA2431 | 1.0 | 1.0 | 1.2 | IPF12951   | 8968605..8 unknown function orf19.3401          | 12951 | IPF12950   | No significant S.c. match                                                      |
| CA2432 | 1.0 | 0.9 | 1.0 | COQ3       | complemer 3,4-dihydroxy-5-hexap orf19.3400      | 12953 | IPF12951   | UNCLASSImolecular_function unknown                                             |
| CA2433 | 0.9 | 0.9 | 1.0 | IPF12959   | 8970442..8 unknown function orf19.3399          | 12959 | CaCOQ3     | Metabolism transferase activity                                                |
| CA2434 | 1.0 | 1.0 | 1.0 | IPF9484    | complemer unknown function orf19.3396           | 9484  | IPF12959   | UNCLASSImolecular_function unknown                                             |
| CA2435 | 1.0 | 0.9 | 0.9 | IPF9483    | complemer probable permease (b) orf19.1089i     | 9483  | IPF9484    | UNCLASSIFIED PROTEINS                                                          |
| CA2436 | 1.0 | 0.9 | 1.0 | IPF5500    | 8979991..8 unknown function orf19.2200          | 5500  | IPF9483    | CELL RES transporter activity                                                  |
| CA2437 | 1.0 | 1.0 | 1.1 | PHO86      | complemer inorganic phosphate tra:orf19.2199    | 5501  | IPF5500    | UNCLASSImolecular_function unknown                                             |
| CA2438 | 0.9 | 0.9 | 1.1 | IPF5505    | 8983829..8 unknown function orf19.2198          | 5505  | CaPHO86    | Phosphate molecular_function unknown                                           |
| CA2439 | 0.9 | 0.9 | 0.9 | IPF7514    | 8986955..8 unknown function orf19.2197          | 7514  | IPF5505    | UNCLASSIFIED PROTEINS                                                          |
| CA2440 | 1.0 | 1.1 | 1.0 | IPF7513    | 8989114..8 unknown function orf19.2196          | 7513  | IPF7514    | Nitrogen and sulphur metabolism                                                |
| CA2441 | 1.0 | 0.8 | 0.9 | APM4       | 8990760..8 AP-2 complex subunit, orf19.2194     | 7509  | IPF7513    | UNCLASSImolecular_function unknown                                             |
| CA2442 | 0.9 | 0.9 | 1.0 | PRR5       | 8992474..8 Phosphoribosylpyroph orf19.2193      | 7507  | CaAPM4     | PROTEIN !molecular_function unknown                                            |
| CA2443 |     |     |     | YAF9       | 8997489..8998253                                |       | CaPRR5     | Amino acid transferase activity                                                |
| CA2444 | 0.9 | 1.0 | 0.9 | IPF13883   | complemer Unknown function orf19.5502           | 13883 |            |                                                                                |
| CA2445 | 1.1 | 1.0 | 1.0 | IPF13885   | 8999951..9 unknown function orf19.5503          | 13885 | IPF13883   | No significant S.c. match                                                      |
| CA2446 | 0.9 | 0.8 | 1.0 | IPF2582    | 9002148..9 unknown function orf19.5504          | 2582  | IPF13885   | No significant S.c. match                                                      |
| CA2447 | 1.1 | 1.2 | 1.0 | HIS7       | 9005393..9 Histidine biosynthesis orf19.5505    | 2583  | IPF2582    | UNCLASSImolecular_function unknown                                             |
| CA2448 | 0.9 | 0.9 | 1.0 | PLC1       | 9007674..9 1-phosphatidylinositol- orf19.5506   | 2586  | CaHIS7     | Amino acid transferase activity                                                |
| CA2449 | 0.9 | 0.7 | 0.9 | ENP1       | 9011266..9 Essential nuclear prote orf19.5507   | 2587  | CaPLC1     | Lipid fatty-:hydrolase activity                                                |
| CA2450 | 1.0 | 1.0 | 1.0 | IPF2589    | complemer unknown function orf19.5508           | 2589  | CaENP1     | PROTEIN IRNA binding                                                           |
| CA2451 | 1.0 | 1.0 | 0.9 | IFB2       | complemer unknown function orf19.5509           | 6648  | IPF2589    | UNCLASSIFIED PROTEINS                                                          |
| CA2452 | 2.1 | 1.5 | 2.1 | IPF9955    | complemer unknown function orf19.1099i          | 9955  | CaIFB2     | TRANSPORT FACILITATION                                                         |
| CA2453 | 0.9 | 1.0 | 0.9 | IPF9950    | 9026533..9 unknown function orf19.1099i         | 9950  | IPF9955    | No significant S.c. match                                                      |
| CA2454 | 1.2 | 1.2 | 1.2 | RPL23B.3   | 9030804..9 ribosomal protein L23. orf19.3504    | 9946  | IPF9950    | UNCLASSImolecular_function unknown                                             |
| CA2455 | 1.0 | 1.0 | 0.9 | IPF12228   | complemer unknown function orf19.3505           | 12228 | CaRPL23B   | PROTEIN !structural molecule activity                                          |
| CA2456 | 1.0 | 1.0 | 1.0 | DBR1       | complemer lariat-debranching enz:orf19.3506     | 12230 | IPF12228   | UNCLASSImolecular_function unknown                                             |
| CA2457 | 1.7 | 1.7 | 1.4 | MCR1       | complemer NADH-cytochrome-b5 orf19.3507         | 12231 | CaDBR1     | Nucleotide RNA binding                                                         |
| CA2458 | 1.0 | 1.0 | 1.0 | IPF12233   | 9038767..9 unknown function orf19.3508          | 12233 | CaMCR1     | ENERGY †transporter activity                                                   |
| CA2459 | 1.0 | 0.9 | 1.0 | IPF12234.† | 9040121..9 unknown function, 5-pr orf19.3509    | 12234 | IPF12233   | UNCLASSImolecular_function unknown                                             |
| CA2460 | 1.0 | 1.0 | 1.1 | LYS1.3E    | 9040950..9 Saccharopine dehydrogenase, 3-p      | 18465 | IPF12234.† | No significant S.c. match                                                      |
| CA2461 | 1.0 | 1.1 | 0.9 | MAK11      | complemer involved in cell growth orf19.1791    | 8738  | CaLYS1.3e  | Amino acid metabolism SUBCELLULAR LOCALISATION                                 |
| CA2462 | 1.0 | 1.0 | 0.9 | CDC16      | 9042988..9 subunit of anaphase-pi orf19.1792    | 8736  | CaMAK11    | CELL FATI molecular_function unknown                                           |

|        |     |     |     |            |                                                |            |       |            |                                                                                                                      |
|--------|-----|-----|-----|------------|------------------------------------------------|------------|-------|------------|----------------------------------------------------------------------------------------------------------------------|
| CA2463 | 1.0 | 1.0 | 1.1 | IPF8730    | 9048173..9 unknown function                    | orf19.1793 | 8730  | CaCDC16    | CELL CYC protein binding                                                                                             |
| CA2464 | 1.0 | 1.0 | 1.0 | IPF8727    | complemer unknown function                     | orf19.1794 | 8727  | IPF8730    | UNCLASSI molecular_function unknown                                                                                  |
| CA2465 | 1.0 | 1.0 | 1.0 | IPF8726    | 9052094..9 unknown function                    | orf19.1795 | 8726  | IPF8727    | No significant S.c. match                                                                                            |
| CA2466 | 1.0 | 1.0 | 1.0 | IPF8725    | complemer unknown function                     |            | 8725  | IPF8726    | Nucleotide RNA binding                                                                                               |
| CA2467 | 0.9 | 0.9 | 1.0 | IPF8724    | 9055895..9 unknown function                    | orf19.1796 | 8724  | IPF8725    | No significant S.c. match                                                                                            |
| CA2468 | 0.9 | 0.9 | 1.0 | IPF8723    | complemer unknown function                     | orf19.1797 | 8723  | IPF8724    | C-compour oxidoreductase activity                                                                                    |
| CA2469 | 1.0 | 1.0 | 1.0 | IPF7393    | complemer unknown function                     | orf19.9364 | 7393  | IPF8723    | No significant S.c. match                                                                                            |
| CA2470 | 0.9 | 1.0 | 1.1 | SDH12      | 9069926..9 Succinate dehydrogen                | orf19.1038 | 3247  | IPF7393    | UNCLASSIFIED PROTEINS                                                                                                |
| CA2471 | 1.1 | 1.1 | 1.1 | TOP2       | complemer Topoisomerase II                     | orf19.2873 | 3245  | CaSDH12    | C-compound and carbohydrate metabolism ENERGY SUBCELLULAR LOCALISATION                                               |
| CA2472 | 1.0 | 1.0 | 1.0 | IPF3239    | complemer unknown function                     | orf19.2875 | 3239  | CaTOP2     | CELL CYC isomerase activity                                                                                          |
| CA2473 | 0.9 | 1.0 | 1.0 | CBF1       | complemer putative centromere bi               | orf19.2876 | 3238  | IPF3239    | PROTEIN FATE [folding modification destination] ""CELLULAR TRANSPORT AND TRANSPORT MECHANISMS SUBCELLULAR LOCAL      |
| CA2474 | 5.1 | 3.2 | 3.0 | PDC11      | 9080267..9 Pyruvate decarboxylas               | orf19.2877 | 3234  | CaCBF1     | Amino acid DNA binding                                                                                               |
| CA2475 | 1.0 | 1.1 | 1.0 | IPF3233    | complemer unknown function                     | orf19.2878 | 3233  | CaPDC11    | C-compour lyase activity                                                                                             |
| CA2476 | 0.9 | 1.0 | 0.9 | IFF5       | 9085007..9 unknown function                    | orf19.1039 | 15521 | IPF3233    | No significant S.c. match                                                                                            |
| CA2477 | 1.0 | 1.1 | 0.9 | IPF16016   | complemer unknown function                     | orf19.1039 | 16016 | CaIFF5     | C-compound and carbohydrate metabolism SUBCELLULAR LOCALISATION                                                      |
| CA2478 | 1.0 | 1.0 | 0.9 | DAL52      | 9098997..9 allantoate permease (t              | orf19.3208 | 14177 | IPF16016   | UNCLASSIFIED PROTEINS                                                                                                |
| CA2479 | 1.1 | 0.9 | 1.0 | CCN1       | complemer G1 cyclin                            | orf19.3207 | 15597 | CaDAL52    | CELLULAR TRANSPORT AND TRANSPORT MECHANISMS SUBCELLULAR LOCALISATION TRANSPORT FACILITATION                          |
| CA2480 | 1.0 | 1.1 | 1.0 | CCT7       | complemer component of chaperon                | orf19.1071 | 9837  | CaCCN1     | CELL CYCLE AND DNA PROCESSING ""CELL RESCUE DEFENSE AND VIRULENCE ""CELL FATE SUBCELLULAR LOCALISATION               |
| CA2481 | 1.0 | 0.9 | 1.0 | MRPL36     | 9107958..9 ribosomal protein YmL               | orf19.3205 | 9838  | CaCCT7     | PROTEIN I chaperone activity                                                                                         |
| CA2482 | 1.0 | 0.9 | 0.9 | IPF9841    | complemer unknown function                     | orf19.3204 | 9841  | CaMRPL36   | PROTEIN I structural molecule activity                                                                               |
| CA2483 | 1.0 | 1.1 | 1.0 | IPF19758   | complemer unknown function                     | orf19.3203 | 19758 | IPF9841    | CELL CYCLE AND DNA PROCESSING CONTROL OF CELLULAR ORGANIZATION SUBCELLULAR LOCALISATION                              |
| CA2484 | 1.0 | 1.0 | 1.0 | IPF9846    | 9114239..9 unknown function                    | orf19.1071 | 9846  | IPF19758   | UNCLASSI protein binding                                                                                             |
| CA2485 | 1.0 | 1.0 | 1.0 | PAP12      | 9117478..9 poly(A) polymerase                  | orf19.1071 | 9850  | IPF9846    | UNCLASSIFIED PROTEINS                                                                                                |
| CA2486 | 1.0 | 0.9 | 0.9 | IPF9851    | complemer unknown function                     | orf19.1071 | 9851  | CaPAP12    | TRANSCRIPTION SUBCELLULAR LOCALISATION                                                                               |
| CA2487 | 0.8 | 0.8 | 0.9 | PIK1       | complemer phosphatidylinositol 4-l             | orf19.1071 | 9853  | IPF9851    | TRANSCR transcription regulator activity                                                                             |
| CA2488 | 0.9 | 1.0 | 0.9 | IPF17706   | 9125155..9 Unknown function                    | orf19.1070 | 17706 | CaPIK1     | Lipid fatty-: transferase activity                                                                                   |
| CA2489 | 1.1 | 1.2 | 0.9 | IPF7217    | complemer unknown function                     | orf19.1152 | 7217  | IPF17706   | No significant S.c. match                                                                                            |
| CA2490 | 1.0 | 1.1 | 1.1 | MUM2       | complemer ubiquitin C-terminal hy              | orf19.4044 | 7220  | IPF7217    | TRANSCRIPTION                                                                                                        |
| CA2491 | 1.0 | 1.0 | 1.0 | IPF7221    | complemer unknown function                     | orf19.4046 | 7221  | CaMUM2     | CELL CYC molecular_function unknown                                                                                  |
| CA2492 | 0.7 | 0.5 | 0.9 | IPF7224    | 9132913..9 putative telomere elon              | orf19.4045 | 7224  | IPF7221    | No significant S.c. match                                                                                            |
| CA2493 | 1.5 | 1.2 | 1.2 | IPF7227    | 9134845..9 putative fatty acid dese            | orf19.4048 | 7227  | IPF7224    | CELL CYC molecular_function unknown                                                                                  |
| CA2494 | 1.0 | 1.2 | 1.0 | HTS1       | complemer histidine tRNA synthet               | orf19.4051 | 7230  | IPF7227    | Lipid fatty-acid and isoprenoid metabolism """"CELL RESCUE DEFENSE AND VIRULENCE ""REGULATION OF/INTERACTION WITH CE |
| CA2495 | 0.9 | 1.0 | 1.0 | CTA24      | complemer transcriptional regulat              | orf19.4054 | 7233  | CaHTS1     | PROTEIN I ligase activity                                                                                            |
| CA2496 | 1.2 | 1.0 | 1.1 | IPF3468    | complemer unknown function                     | orf19.4055 | 3468  | CaCTA24    | No significant S.c. match                                                                                            |
| CA2497 | 0.9 | 1.0 | 1.0 | TEL1.3E0   | 9147927..9 Putative phosphatidylir             | orf19.5580 | 15888 | IPF3468    | No significant S.c. match                                                                                            |
| CA2498 | 1.0 | 1.0 | 1.0 | VPS181     | 9153846..9 vacuolar membrane pr                | orf19.5584 | 19951 | CaTEL1.3e  | Lipid fatty-: transferase activity                                                                                   |
| CA2499 | 0.9 | 1.0 | 0.9 | SAP5       | 9158571..9 secreted aspartyl prote             | orf19.5585 | 6816  | CaVPS181   | PROTEIN I protein binding                                                                                            |
| CA2500 | 1.0 | 1.0 | 1.0 | FIG4       | complemer suppressor of sac1 mu                | orf19.5586 | 6814  | CaSAP5     | PROTEIN FATE [folding modification destination] ""Other virulence attributes                                         |
| CA2501 | 1.0 | 0.9 | 0.9 | IPF6812    | complemer unknown function                     | orf19.5587 | 6812  | CaFIG4     | CELLULAF hydrolase activity                                                                                          |
| CA2502 | 1.0 | 1.0 | 1.0 | IPF20103   | 9166929..9 unknown function                    | orf19.5588 | 20103 | IPF6812    | UNCLASSI protein binding                                                                                             |
| CA2503 | 1.0 | 1.0 | 0.9 | IPF6803.5f | 9171868..9 unknown function, 5-pr              | orf19.5592 | 6803  | IPF20103   | No significant S.c. match                                                                                            |
| CA2504 | 1.0 | 0.9 | 0.9 | IPF6803.3f | 9173034..9 unknown function, 3-pr              | orf19.5593 | 6801  | IPF6803.5f | UNCLASSIFIED PROTEINS                                                                                                |
| CA2505 | 1.2 | 1.1 | 1.1 | IPF6796    | 9175569..9 unknown function                    | orf19.5595 | 6796  | IPF6803.3f | No significant S.c. match                                                                                            |
| CA2506 | 1.0 | 0.9 | 1.0 | IPF6794    | complemer unknown function                     | orf19.5596 | 6794  | IPF6796    | CELL FATI RNA binding                                                                                                |
| CA2507 | 1.0 | 0.9 | 1.0 | IPF18459.: | 9179867..9 aldehyde dehydrogenase, 3-prime     |            | 18459 | IPF6794    | TRANSCRIPTION                                                                                                        |
| CA2508 | 1.0 | 1.0 | 1.1 | BET5       | 9181124..9 targeting and fusion of             | orf19.302  | 1468  | IPF18459.: | CLASSIFICATION NOT YET CLEAR-CUT                                                                                     |
| CA2509 | 1.1 | 1.1 | 1.0 | IPF1471    | 9182324..9 aminotriazole resistanc             | orf19.304  | 1471  | CaBET5     | CELLULAF molecular_function unknown                                                                                  |
| CA2510 | 1.0 | 0.9 | 1.0 | IPF1472    | 9184056..9 unknown function                    | orf19.305  | 1472  | IPF1471    | CELL RES molecular_function unknown                                                                                  |
| CA2511 | 1.0 | 0.9 | 1.0 | IPF1474    | 9185635..9 myosin-like protein                 | orf19.306  | 1474  | IPF1472    | TRANSPORT FACILITATION                                                                                               |
| CA2512 | 1.1 | 1.0 | 1.0 | HF11       | complemer Putative transcriptional             | orf19.307  | 1476  | IPF1474    | CELLULAR TRANSPORT AND TRANSPORT MECHANISMS SUBCELLULAR LOCALISATION                                                 |
| CA2513 | 1.0 | 1.0 | 0.9 | SNG1       | 9190417..9 Involved in uracuanid               | orf19.308  | 1478  | CaHF11     | TRANSCR transcription regulator activity                                                                             |
| CA2514 | 0.9 | 0.9 | 1.0 | FUR4       | complemer Probable uracile or alle             | orf19.313  | 1484  | CaSNG1     | CELL RES molecular_function unknown                                                                                  |
| CA2515 | 0.9 | 1.1 | 0.9 | IPF19759   | 9200705..9 Unknown Function                    | orf19.5510 | 19759 | CaFUR4     | CELLULAF transporter activity                                                                                        |
| CA2516 | 1.0 | 1.0 | 0.9 | IPF4301    | complemer unknown function                     | orf19.5513 | 4310  | IPF19759   | TRANSCR molecular_function unknown                                                                                   |
| CA2517 | 0.9 | 0.9 | 0.9 | IPF4311    | 9205609..9 unknown function                    | orf19.5514 | 4311  | IPF4301    | TRANSCR transcription regulator activity                                                                             |
| CA2518 | 0.9 | 1.0 | 1.0 | CBP3       | complemer involved in cytochrome               | orf19.5515 | 4312  | IPF4311    | No significant S.c. match                                                                                            |
| CA2519 | 0.9 | 0.9 | 0.9 | SRP72      | 9207788..9 signal recognition parti            | orf19.5516 | 4313  | CaCBP3     | PROTEIN I molecular_function unknown                                                                                 |
| CA2520 | 1.1 | 1.1 | 1.1 | IPF20104   | 9211001..9 alcohol dehydrogenase               | orf19.5517 | 20104 | CaSRP72    | PROTEIN FATE [folding modification destination] ""SUBCELLULAR LOCALISATION                                           |
| CA2521 | 1.1 | 1.1 | 1.2 | IPF4317    | complemer unknown function                     | orf19.5518 | 4317  | IPF20104   | C-compour oxidoreductase activity                                                                                    |
| CA2522 | 0.7 | 0.7 | 0.8 | GCV1       | complemer glycine cleavage T pro               | orf19.5519 | 4318  | IPF4317    | No significant S.c. match                                                                                            |
| CA2523 | 1.0 | 1.0 | 1.0 | IPF4319    | complemer unknown function                     | orf19.5520 | 4319  | CaGCV1     | Amino acid oxidoreductase activity                                                                                   |
| CA2524 | 0.8 | 0.7 | 0.6 | IPF4322    | 9217494..9 unknown function                    | orf19.5521 | 4322  | IPF4319    | No significant S.c. match                                                                                            |
| CA2525 | 0.9 | 1.0 | 1.1 | IPF4324.3  | complemer unknown function, 3-pr               | orf19.5522 | 4324  | IPF4322    | REGULATI molecular_function unknown                                                                                  |
| CA2526 | 1.0 | 1.1 | 1.0 | SEC20      | complemer secretory pathway prot               | orf19.5526 | 4329  | IPF4324.3  | No significant S.c. match                                                                                            |
| CA2527 | 1.0 | 1.1 | 1.0 | IPF4331    | 9223521..9 unknown function                    | orf19.5527 | 4331  | CaSEC20    | PROTEIN I transporter activity                                                                                       |
| CA2528 | 1.0 | 1.0 | 1.1 | MOB1       | complemer required for completor               | orf19.5528 | 4332  | IPF4331    | ENERGY RNA binding                                                                                                   |
| CA2530 | 1.0 | 1.1 | 1.1 | IPF12782   | 9229267..9 unknown function                    | orf19.3176 | 12782 | CaMOB1     | CELL CYC enzyme regulator activity                                                                                   |
| CA2531 | 1.0 | 1.2 | 1.1 | RIB2       | complemer DRAP deaminase (by l                 | orf19.3177 | 12784 | IPF12782   | UNCLASSI molecular_function unknown                                                                                  |
| CA2532 | 1.0 | 1.0 | 1.0 | PRP9       | complemer pre-mRNA splicing fac                | orf19.3178 | 20105 | CaRIB2     | Metabolism lyase activity                                                                                            |
| CA2533 | 0.9 | 1.1 | 1.0 | IPF12790   | 9234610..9 inositol polyphosphate              | orf19.3180 | 12790 | CaPRP9     | TRANSCR RNA binding                                                                                                  |
| CA2534 | 1.2 | 1.2 | 1.0 | IPF12793   | complemer similar to Saccharomy                | orf19.3182 | 12793 | IPF12790   | Lipid fatty-: hydrolase activity                                                                                     |
| CA2535 | 1.0 | 1.0 | 1.0 | NCE11      | 9237807..9 involved in non-classical protein e |            | 20106 | IPF12793   | TRANSCR DNA binding,transcription regulator activity                                                                 |

|        |     |     |     |            |                                             |             |                  |                                                                                                            |
|--------|-----|-----|-----|------------|---------------------------------------------|-------------|------------------|------------------------------------------------------------------------------------------------------------|
| CA2536 | 1.0 | 1.1 | 1.0 | IPF20107   | complemer unknown function                  | orf19.3183  | 20107 CaNCE11    | CELLULAR TRANSPORT AND TRANSPORT MECHANISMS                                                                |
| CA2537 | 1.0 | 1.0 | 1.0 | IPF20108   | 9238983..9similar to Saccharomy             | orf19.3184  | 20108 IPF20107   | PROTEIN Imolecular_function unknown                                                                        |
| CA2538 | 0.9 | 1.1 | 0.9 | NAT1       | complemer Protein N-acetyltransfe           | orf19.3185  | 15324 IPF20108   | SUBCELLULAR LOCALISATION                                                                                   |
| CA2539 | 1.2 | 1.2 | 1.1 | IPF9188    | 9243131..9 unknown function                 | orf19.3187  | 9188 CaNAT1      | Lipid fatty-ε transferase activity                                                                         |
| CA2541 | 1.0 | 1.1 | 1.0 | IPF9191.3f | 9247480..9 unknown function, 3-pr           | orf19.3188  | 9191 IPF9188     | TRANSCRIPTION ""CELL RESCUE DEFENSE AND VIRULENCE ""SUBCELLULAR LOCALISATION                               |
| CA2542 | 0.8 | 0.9 | 0.8 | IPF16067   | 9251849..9 unknown function                 | orf19.3190  | 16067 IPF9191.3f | TRANSCRIPTION ""CELL RESCUE DEFENSE AND VIRULENCE ""SUBCELLULAR LOCALISATION                               |
| CA2543 | 1.0 | 1.0 | 1.0 | IPF16925   | 9257179..9 unknown function                 | orf19.2828  | 16925 IPF16067   | TRANSCR transcription regulator activity                                                                   |
| CA2544 | 0.9 | 0.9 | 1.0 | IPF16924   | 9258342..9 unknown function                 | orf19.2829  | 16924 IPF16925   | PROTEIN I chaperone activity                                                                               |
| CA2545 | 1.0 | 1.0 | 1.0 | RRP9       | 9259154..9U3 small nucleolar ribc           | orf19.2830  | 15036 IPF16924   | UNCLASSImolecular_function unknown                                                                         |
| CA2546 | 1.0 | 1.0 | 1.0 | RPC31      | complemer DNA-directed RNA pol              | orf19.2831  | 15034 CaRRP9     | TRANSCR RNA binding                                                                                        |
| CA2547 | 1.0 | 1.0 | 1.0 | IPF14911   | 9265854..9 unknown function                 | orf19.2832  | 14911 CaRPC31    | TRANSCR nucleotidyltransferase activity                                                                    |
| CA2548 | 1.1 | 1.0 | 0.9 | IPF9101    | complemer unknown function                  | orf19.2833  | 9101 IPF14911    | UNCLASSImolecular_function unknown                                                                         |
| CA2549 | 1.1 | 1.1 | 1.1 | RPD31      | complemer histone deacetylase B             | orf19.2834  | 9100 IPF9101     | No significant S.c. match                                                                                  |
| CA2550 | 0.9 | 1.2 | 1.0 | IPF9099    | complemer similar to Saccharomy             | orf19.2835  | 9099 CaRPD31     | Phosphate metabolism CELL CYCLE AND DNA PROCESSING TRANSCRIPTION CELL FATE SUBCELLULAR LOCALISATION        |
| CA2551 | 1.0 | 1.0 | 1.0 | IPF9098    | 9275206..9 unknown function                 | orf19.2836  | 9098 IPF9099     | PROTEIN FATE [folding modification destination]                                                            |
| CA2552 | 1.1 | 1.1 | 1.0 | ALG5       | complemer dolichol-P-glucose syn            | orf19.2837  | 9097 IPF9098     | No significant S.c. match                                                                                  |
| CA2553 | 1.0 | 1.0 | 1.0 | IPF9096    | complemer probable mannosidase              | orf19.2838  | 9096 CaALG5      | C-compour transferase activity                                                                             |
| CA2554 | 0.9 | 1.0 | 1.0 | CIRT4B     | 9280201..9 probable transposase             | orf19.2839  | 9095 IPF9096     | No significant S.c. match                                                                                  |
| CA2555 | 1.1 | 1.0 | 0.9 | IPF12105   | complemer unknown function                  | orf19.5633  | 12105 CaCirt4b   | CELL CYCLE AND DNA PROCESSING SUBCELLULAR LOCALISATION                                                     |
| CA2556 | 1.3 | 1.5 | 1.2 | FRE5       | complemer ferric reductase transr           | orf19.5634  | 12102 IPF12105   | C-compound and carbohydrate metabolism ENERGY SUBCELLULAR LOCALISATION                                     |
| CA2557 | 1.4 | 1.7 | 1.3 | IPF12101   | 9287725..9 mycelial surface antige          | orf19.5635  | 12101 CaFRE5     | REGULATION OF/INTERACTION WITH CELLULAR ENVIRONMENT Other virulence attributes                             |
| CA2558 | 1.5 | 1.5 | 1.4 | RBT5       | 9289637..9 repressed by TUP1 pr             | orf19.5636  | 19952 IPF12101   | No significant S.c. match                                                                                  |
| CA2559 | 0.9 | 0.9 | 1.1 | HIS4       | complemer Histidine biosynthesis            | orf19.5639  | 12359 CaRBT5     | No significant S.c. match                                                                                  |
| CA2560 | 1.0 | 1.0 | 1.0 | PEX5       | complemer peroxisomal targeting             | orf19.5640  | 12357 CaHIS4     | Amino acid oxidoreductase activity                                                                         |
| CA2561 | 0.9 | 1.0 | 1.0 | CAR2       | complemer ornithine aminotransfer           | orf19.5641  | 12355 CaPEX5     | PROTEIN Isignal transducer activity                                                                        |
| CA2562 | 1.3 | 2.1 | 1.3 | IPF19953   | 9297454..9 unknown function                 | orf19.5642  | 19953 CaCAR2     | Amino acid transferase activity                                                                            |
| CA2563 | 0.9 | 1.0 | 1.1 | ECM7       | 9298071..9 cell wall biogenesis an          | orf19.5643  | 12129 IPF19953   | No significant S.c. match                                                                                  |
| CA2564 | 0.8 | 0.9 | 0.9 | IPF12127   | 9299670..9 unknown function                 | orf19.5644  | 12127 CaECM7     | CONTROL molecular_function unknown                                                                         |
| CA2565 | 1.1 | 1.8 | 1.3 | MET15      | complemer O-acetylhomoserine O              | orf19.5645  | 12125 IPF12127   | UNCLASSImolecular_function unknown                                                                         |
| CA2566 | 1.0 | 0.9 | 0.9 | IPF12122   | 9302509..9 unknown function                 | orf19.5646  | 12122 CaMET15    | Amino acid transferase activity                                                                            |
| CA2567 | 1.0 | 1.1 | 0.9 | SUB2.3F    | complemer Involved in pre-mRNA              | orf19.5647  | 12120 IPF12122   | UNCLASSImolecular_function unknown                                                                         |
| CA2569 | 1.0 | 0.8 | 0.9 | IPF12117   | complemer unknown function                  | orf19.5648  | 12117 CaSUB2.3f  | TRANSCR protein binding                                                                                    |
| CA2570 | 1.0 | 1.0 | 0.9 | PRO3       | complemer delta 1-pyrroline-5-cart          | orf19.5650  | 12114 IPF12117   | No significant S.c. match                                                                                  |
| CA2571 | 0.9 | 0.9 | 0.9 | IPF13769   | 9309333..9 unknown function                 | orf19.1359f | 13769 CaPRO3     | Amino acid oxidoreductase activity                                                                         |
| CA2572 | 1.1 | 1.1 | 1.0 | IPF13766   | 9311002..9 unknown function                 | orf19.6211  | 13766 IPF13769   | TRANSP transporter activity                                                                                |
| CA2573 | 0.9 | 1.0 | 0.9 | SUI2       | complemer translation initiation fac        | orf19.6213  | 13764 IPF13766   | CELL CYCLE AND DNA PROCESSING ""PROTEIN FATE [folding modification destination] ""SUBCELLULAR LOCALISATION |
| CA2574 | 1.0 | 0.9 | 1.0 | ATH1       | 9315495..9acid trehalase, vacuole           | orf19.6214  | 19760 CaSUI2     | PROTEIN :translation regulator activity                                                                    |
| CA2575 | 1.0 | 0.9 | 1.0 | SEC31      | complemer Component of the COF              | orf19.6217  | 7439 CaATH1      | C-compour hydrolase activity                                                                               |
| CA2576 | 1.0 | 0.9 | 1.1 | IPF7432    | 9323625..9 unknown function                 | orf19.6219  | 7432 CaSEC31     | CELLULAFstructural molecule activity                                                                       |
| CA2577 | 1.0 | 1.0 | 1.0 | IPF7430    | 9325294..9 unknown function                 | orf19.6220  | 7430 IPF7432     | No significant S.c. match                                                                                  |
| CA2578 | 1.2 | 1.4 | 1.1 | MMD1.3     | 9328479..9 Maintenance of mitochondrial DN  |             | 7427 IPF7430     | UNCLASSImolecular_function unknown                                                                         |
| CA2579 | 1.0 | 2.6 | 1.1 | RPL34B.3   | 9329645..9 Ribosomal protein L34.e, 3-prime |             | 7424 CaMMD1.3    | CONTROL molecular_function unknown                                                                         |
| CA2581 | 1.1 | 1.0 | 1.0 | IPF9450    | 9330479..9 unknown function                 | orf19.4370  | 9450 CaRPL34B    | PROTEIN :structural molecule activity                                                                      |
| CA2582 | 3.2 | 1.5 | 3.2 | TAL1       | 9335898..9transaldolase (by hom             | orf19.4371  | 9448 IPF9450     | No significant S.c. match                                                                                  |
| CA2583 | 1.0 | 1.0 | 1.1 | IPF9445    | complemer unknown function                  | orf19.4372  | 9445 CaTAL1      | C-compour transferase activity                                                                             |
| CA2584 | 0.9 | 1.0 | 1.0 | IPF9440    | complemer similar to Saccharomy             | orf19.4373  | 9440 IPF9445     | TRANSPORT FACILITATION                                                                                     |
| CA2585 | 1.0 | 1.0 | 0.9 | IPF9438    | complemer similar to Saccharomy             | orf19.4374  | 9438 IPF9440     | CLASSIFICtransferase activity                                                                              |
| CA2586 | 0.9 | 1.2 | 1.0 | IPF9435    | 9343175..9 unknown function                 | orf19.4375  | 9435 IPF9438     | TRANSCR RNA binding                                                                                        |
| CA2587 | 1.3 | 1.4 | 1.3 | RPS30.3    | complemer 40S ribosomal protein S30, 3-prim |             | 15100 IPF9435    | UNCLASSItransferase activity                                                                               |
| CA2588 | 1.0 | 0.9 | 1.0 | IPF15098   | complemer Unknown function                  | orf19.4376  | 15098 CaRPS30.   | PROTEIN :structural molecule activity                                                                      |
| CA2589 | 1.1 | 1.0 | 1.1 | KRE1       | complemer secretory pathway prot            | orf19.4377  | 13702 IPF15098   | No significant S.c. match                                                                                  |
| CA2590 | 1.0 | 0.9 | 1.0 | PPH3.3B    | complemer protein serine/threonin           | orf19.4378  | 12918 CaKRE1     | No significant S.c. match                                                                                  |
| CA2591 | 0.9 | 1.0 | 0.9 | IPF18448.3 | 9357618..9 unknown function, 3-pr           | orf19.60    | 18448 CaPPH3.3i  | CELL FATE                                                                                                  |
| CA2592 | 1.0 | 1.0 | 1.0 | IPF18447   | complemer putative zinc-finger pro          | orf19.59    | 18447 IPF18448.3 | SUBCELLULAR LOCALISATION UNCLASSIFIED PROTEINS                                                             |
| CA2593 | 1.0 | 1.1 | 1.0 | RRP6       | 9359514..9 involved in 5.8S rRNA            | orf19.58    | 12827 IPF18447   | UNCLASSImolecular_function unknown                                                                         |
| CA2594 | 0.9 | 1.0 | 1.0 | IPF12824   | 9362616..9 unknown function                 | orf19.57    | 12824 CaRRP6     | UNCLASSIRNA binding                                                                                        |
| CA2595 | 1.1 | 1.1 | 1.0 | ARG2       | 9363451..9 acetylglutamate synthe           | orf19.56    | 12823 IPF12824   | UNCLASSIDNA binding                                                                                        |
| CA2596 | 1.1 | 1.0 | 1.0 | IPF19546   | 9365758..9 unknown function                 | orf19.55    | 19546 CaARG2     | Amino acid transferase activity                                                                            |
| CA2597 | 1.1 | 1.0 | 1.1 | IFQ3       | complemer unknown function                  | orf19.54    | 13148 IPF19546   | UNCLASSImolecular_function unknown                                                                         |
| CA2598 | 1.1 | 1.0 | 1.1 | IPF13142   | 9371688..9 unknown function                 | orf19.53    | 13142 CaIFQ3     | No significant S.c. match                                                                                  |
| CA2599 | 1.1 | 1.0 | 1.3 | IPF11176   | 9373658..9 similar to Saccharomy            | orf19.52    | 11176 IPF13142   | No significant S.c. match                                                                                  |
| CA2600 | 1.0 | 1.0 | 1.1 | IPF11177   | complemer similar to Saccharomy             | orf19.51    | 11177 IPF11176   | CELLULAFmolecular_function unknown                                                                         |
| CA2601 | 1.0 | 1.0 | 1.0 | IPF11181   | 9381355..9 unknown function                 | orf19.50    | 11181 IPF11177   | PROTEIN :molecular_function unknown                                                                        |
| CA2602 | 1.0 | 1.0 | 1.1 | IPF5473    | complemer unknown function                  | orf19.5679  | 5473 IPF11181    | PROTEIN Iligase activity                                                                                   |
| CA2603 | 1.1 | 1.0 | 0.9 | IPF5471    | complemer unknown function                  | orf19.5680  | 5471 IPF5473     | PROTEIN FATE [folding modification destination]                                                            |
| CA2604 | 1.0 | 1.1 | 1.0 | IPF5469    | complemer unknown function                  | orf19.5681  | 5469 IPF5471     | No significant S.c. match                                                                                  |
| CA2605 | 1.1 | 1.2 | 1.0 | SRP1       | 9388143..9 alpha importin by hom            | orf19.5682  | 5468 IPF5469     | No significant S.c. match                                                                                  |
| CA2606 | 1.1 | 1.2 | 1.0 | IPF5466    | 9389917..9 unknown function                 | orf19.5683  | 5466 CaSRP1      | PROTEIN Iprotein binding                                                                                   |
| CA2607 | 1.1 | 1.2 | 1.1 | MRPL38     | 9390697..9 ribosomal protein of th          | orf19.5684  | 5464 IPF5466     | UNCLASSImolecular_function unknown                                                                         |
| CA2608 | 1.0 | 1.2 | 1.0 | THS1       | 9391498..9 threonyl tRNA synthet            | orf19.5685  | 5462 CaMRPL3f    | PROTEIN :structural molecule activity                                                                      |
| CA2609 | 1.0 | 0.9 | 0.9 | IPF5457    | 9395086..9 similar to Saccharomy            | orf19.5689  | 5457 CaTHS1      | Nucleotide ligase activity                                                                                 |
| CA2610 | 1.3 | 1.1 | 1.0 | CDC11      | complemer septin by homology                | orf19.5691  | 5456 IPF5457     | PROTEIN Imolecular_function unknown                                                                        |

|        |     |     |     |            |                                                  |            |       |            |                                                                                                                  |
|--------|-----|-----|-----|------------|--------------------------------------------------|------------|-------|------------|------------------------------------------------------------------------------------------------------------------|
| CA2611 | 0.9 | 0.9 | 0.9 | IPF5453    | 9397365..9 unknown function                      | orf19.5692 | 5453  | CaCDC11    | C-compound structural molecule activity                                                                          |
| CA2612 | 1.1 | 1.0 | 1.0 | GAA1       | 9399699..9 required for attachment               | orf19.5693 | 5450  | IPF5453    | No significant S.c. match                                                                                        |
| CA2613 | 1.1 | 1.0 | 1.0 | IPF5446    | complemer putative ribosomal prot                | orf19.5698 | 5446  | CaGAA1     | Lipid fatty-ε hydrolase activity                                                                                 |
| CA2614 | 0.5 | 0.7 | 0.4 | CTA241.E   | complemer transcriptional activator, exon 2      |            | 5444  | IPF5446    | PROTEIN † structural molecule activity                                                                           |
| CA2615 | 1.0 | 0.9 | 1.1 | CTA241.E   | complemer transcriptional activator              | orf19.5700 | 5443  | CaCTA241   | No significant S.c. match                                                                                        |
| CA2616 | 1.1 | 0.9 | 1.0 | IPF3540    | 9407379..9 unknown function                      | orf19.2814 | 3540  | CaCTA241   | No significant S.c. match                                                                                        |
| CA2617 | 0.9 | 0.9 | 0.8 | IPF3539    | complemer unknown function                       | orf19.2813 | 3539  | IPF3540    | No significant S.c. match                                                                                        |
| CA2618 | 1.1 | 1.0 | 1.1 | SNG2       | complemer drug transporter (by hc                | orf19.2812 | 19762 | IPF3539    | No significant S.c. match                                                                                        |
| CA2619 | 0.9 | 1.0 | 0.9 | IPF9490    | complemer amino acid permease (                  | orf19.2810 | 9490  | CaSNG2     | CELL RESCUE DEFENSE AND VIRULENCE ""TRANSPORT FACILITATION                                                       |
| CA2620 | 0.7 | 0.7 | 0.5 | IPF9496    | complemer carnitine O-acetyltrans                | orf19.2809 | 9496  | IPF9490    | Amino acid metabolism CELLULAR TRANSPORT AND TRANSPORT MECHANISMS SUBCELLULAR LOCALISATION TRANSPORT FA          |
| CA2621 | 1.0 | 1.0 | 1.0 | IPF9499    | complemer probable transcription (               | orf19.2808 | 9499  | IPF9496    | C-compound transferase activity                                                                                  |
| CA2622 | 0.9 | 0.8 | 1.0 | PER3.EXO   | complemer peroxisomal import prc                 | orf19.2806 | 11531 | IPF9499    | C-compound and carbohydrate metabolism ENERGY TRANSCRIPTION SUBCELLULAR LOCALISATION                             |
| CA2623 | 0.9 | 0.9 | 0.9 | PER3.EXO   | complemer peroxisomal import prc                 | orf19.1032 | 19631 | CaPER3.e   | No significant S.c. match                                                                                        |
| CA2624 | 1.0 | 1.0 | 1.0 | ARG81.3E   | 9436131..9 transcription factor possibly involve |            | 17734 | CaPER3.e   | No significant S.c. match                                                                                        |
| CA2625 | 1.1 | 1.0 | 1.2 | IPF10919   | 9438459..9 Similar to Flo1p (by ho               | orf19.1222 | 10919 | CaARG81    | Amino acid metabolism Nitrogen and sulphur metabolism TRANSCRIPTION SUBCELLULAR LOCALISATION                     |
| CA2626 | 0.9 | 0.9 | 1.1 | PAN2       | complemer component of Pab1p-s                   | orf19.4764 | 10918 | IPF10919   | CONTROL molecular_function unknown                                                                               |
| CA2627 | 1.0 | 1.0 | 1.0 | IPF10916   | 9444414..9 unknown function                      | orf19.4763 | 10916 | CaPAN2     | TRANSCR RNA binding                                                                                              |
| CA2628 | 1.0 | 1.0 | 1.0 | SIR22      | complemer canal regulatory protei                | orf19.1222 | 10913 | IPF10916   | UNCLASSI molecular_function unknown                                                                              |
| CA2629 | 1.0 | 1.0 | 0.9 | IPF10911   | 9448317..9 unknown function                      | orf19.1222 | 18440 | CaSIR22    | TRANSCR hydrolase activity                                                                                       |
| CA2630 | 0.7 | 1.1 | 0.5 | COX5A      | 9450350..9 cytochrome-c oxidase                  | orf19.1222 | 10910 | IPF10911   | UNCLASSI transferase activity                                                                                    |
| CA2631 | 0.6 | 0.8 | 0.4 | IPF14389   | complemer ubiquinone oxidoreduc                  | orf19.4758 | 14389 | CaCOX5A    | ENERGY ε oxidoreductase activity                                                                                 |
| CA2632 | 1.0 | 0.9 | 0.9 | NAR1       | complemer Yeast nuclear architect                | orf19.4757 | 14388 | IPF14389   | No significant S.c. match                                                                                        |
| CA2633 | 1.2 | 1.1 | 1.3 | KEX2       | 9457875..9 Kexin precursor (KEX2                 | orf19.4755 | 13063 | CaNAR1     | UNCLASSI oxidoreductase activity                                                                                 |
| CA2634 | 6.1 | 3.3 | 2.4 | ZWF1       | 9462347..9 glucose-6-phosphate c                 | orf19.1221 | 13060 | CaKEX2     | PROTEIN † peptidase activity                                                                                     |
| CA2635 | 1.0 | 1.0 | 1.0 | CKB22      | 9466876..9 Casein kinase II, beta                | orf19.4297 | 2946  | CaZWF1     | C-compound oxidoreductase activity                                                                               |
| CA2636 | 1.0 | 1.0 | 1.0 | MSW1       | 9468015..9 Mitochondrial tryptoph                | orf19.4299 | 2944  | CaCKB22    | TRANSCR protein kinase activity                                                                                  |
| CA2637 | 0.9 | 0.9 | 1.0 | IPF19954   | 9470178..9 unknown function                      | orf19.4301 | 19954 | CaMSW1     | PROTEIN † ligase activity                                                                                        |
| CA2638 | 1.1 | 1.1 | 1.1 | GAP3       | complemer General amino acid pe                  | orf19.4304 | 2936  | IPF19954   | No significant S.c. match                                                                                        |
| CA2639 | 1.0 | 1.1 | 1.0 | IPF2932    | complemer unknown function                       | orf19.4305 | 2932  | CaGAP3     | Amino acid metabolism CELLULAR TRANSPORT AND TRANSPORT MECHANISMS SUBCELLULAR LOCALISATION TRANSPORT FA          |
| CA2640 | 0.9 | 0.8 | 1.0 | IPF2930    | 9476075..9 Suppressor of PAB1 (by                | homology   | 2930  | IPF2932    | CELLULAR TRANSPORT AND TRANSPORT MECHANISMS SUBCELLULAR LOCALISATION                                             |
| CA2641 | 1.0 | 1.0 | 0.9 | IPF2929    | complemer unknown function                       | orf19.4306 | 2929  | IPF2930    | TRANSCRIPTION                                                                                                    |
| CA2642 | 1.0 | 0.9 | 1.0 | FTI1       | 9477448..9 Rad52 inhibitor (by ho                | orf19.4307 | 2927  | IPF2929    | UNCLASSI molecular_function unknown                                                                              |
| CA2643 | 0.8 | 0.8 | 0.9 | HSL1       | complemer Ser/thr protein kinase                 | tof19.4308 | 2926  | CaFTI1     | PROTEIN † molecular_function unknown                                                                             |
| CA2644 | 2.7 | 1.5 | 2.1 | GRP2       | complemer Reductase (by homolo                   | orf19.4309 | 2918  | CaHSL1     | CELL CYC protein kinase activity                                                                                 |
| CA2645 | 1.0 | 1.4 | 1.2 | YNK1       | 9488422..9 Nucleoside diphosphat                 | orf19.4311 | 2914  | CaGRP2     | Metabolism of vitamins cofactors and prosthetic groups                                                           |
| CA2646 | 1.0 | 1.0 | 0.9 | IPF13089   | 9493426..9 unknown function                      | orf19.1185 | 13899 | CaYNK1     | Nucleotide transferase activity                                                                                  |
| CA2647 | 1.1 | 1.0 | 1.2 | IPF13088   | 9494709..9 unknown function                      | orf19.1186 | 13088 | IPF13089   | UNCLASSI molecular_function unknown                                                                              |
| CA2648 | 1.0 | 1.4 | 1.1 | IPF9062    | 9497177..9 unknown function                      | orf19.1187 | 9062  | IPF13088   | UNCLASSIFIED PROTEINS                                                                                            |
| CA2649 | 1.0 | 1.1 | 1.1 | IPF9057    | 9504384..9 unknown function                      | orf19.1189 | 9057  | IPF9062    | CLASSIFIC DNA binding, transcription regulator activity                                                          |
| CA2650 | 0.9 | 1.1 | 1.0 | STV1       | complemer H+-ATPase V0 domain                    | orf19.1190 | 13604 | IPF9057    | CELL CYCLE AND DNA PROCESSING SUBCELLULAR LOCALISATION                                                           |
| CA2651 | 1.0 | 1.0 | 1.1 | HRD3       | 9511782..9 involved in HMG-CoA                   | tof19.1191 | 13605 | CaSTV1     | PROTEIN FATE [folding modification destination] ""CELLULAR TRANSPORT AND TRANSPORT MECHANISMS REGULATION OF/INTE |
| CA2652 | 1.0 | 1.0 | 1.0 | DNA2       | complemer DNA helicase (by hom                   | orf19.1192 | 15025 | CaHRD3     | PROTEIN † ligase activity                                                                                        |
| CA2653 | 0.5 | 0.2 | 0.9 | IPF8472.3E | 9519932..9 unknown function, 3-pr                | orf19.5701 | 8472  | CaDNA2     | CELL CYC DNA binding, helicase activity                                                                          |
| CA2654 | 0.9 | 1.0 | 1.0 | IPF8474    | complemer unknown function                       | orf19.5702 | 8474  | IPF8472.3E | UNCLASSI protein binding                                                                                         |
| CA2655 | 0.9 | 0.8 | 0.9 | IPF8477    | 9526218..9 unknown function                      | orf19.5704 | 8477  | IPF8474    | UNCLASSI molecular_function unknown                                                                              |
| CA2656 | 1.1 | 1.0 | 0.9 | NAM2       | complemer mitochondrial leucine--                | orf19.5705 | 19955 | IPF8477    | UNCLASSI molecular_function unknown                                                                              |
| CA2657 | 0.9 | 0.9 | 0.8 | IPF8486    | 9531702..9 unknown function                      | orf19.5710 | 8486  | CaNAM2     | TRANSCR RNA binding                                                                                              |
| CA2658 | 1.1 | 1.0 | 1.0 | IPF8105    | 9538183..9 unknown function                      | orf19.5711 | 8105  | IPF8486    | TRANSCRIPTION CELLULAR TRANSPORT AND TRANSPORT MECHANISMS SUBCELLULAR LOCALISATION                               |
| CA2659 | 1.1 | 1.0 | 1.1 | NDH2       | 9540741..9 NADH dehydrogenase                    | orf19.5713 | 8102  | IPF8105    | Lipid fatty-ε transporter activity                                                                               |
| CA2660 | 1.0 | 0.9 | 1.0 | SAP1       | complemer secreted aspartyl prote                | orf19.5714 | 8101  | CaNDH2     | ENERGY SUBCELLULAR LOCALISATION                                                                                  |
| CA2661 | 1.1 | 1.0 | 1.2 | AAT1       | 9551732..9 aspartate aminotransf                 | orf19.3554 | 14258 | CaSAP1     | PROTEIN FATE [folding modification destination] ""Other virulence attributes                                     |
| CA2662 | 1.0 | 0.9 | 1.0 | IPF17139   | 9553708..9 unknown function                      | orf19.3553 | 17139 | CaAAT1     | Amino acid metabolism Nitrogen and sulphur metabolism SUBCELLULAR LOCALISATION                                   |
| CA2663 | 0.9 | 0.9 | 0.9 | NUP133     | 9555106..9 nuclear pore protein (b               | orf19.3552 | 13373 | IPF17139   | UNCLASSI RNA binding                                                                                             |
| CA2664 | 0.9 | 0.9 | 1.1 | IPF13370   | complemer unknown function                       | orf19.3551 | 13370 | CaNUP133   | TRANSCR structural molecule activity                                                                             |
| CA2665 | 1.0 | 1.0 | 1.0 | CDC21      | complemer thymidylate synthase (                 | orf19.3549 | 13364 | IPF13370   | UNCLASSI structural molecule activity                                                                            |
| CA2666 | 1.0 | 1.1 | 1.0 | IPF16995   | complemer unknown function                       | orf19.3548 | 16995 | CaCDC21    | Nucleotide transferase activity                                                                                  |
| CA2667 | 1.0 | 1.0 | 1.0 | IPF16996   | 9563566..9 unknown function                      | orf19.3547 | 16996 | IPF16995   | UNCLASSI molecular_function unknown                                                                              |
| CA2668 | 1.2 | 1.0 | 1.2 | IPF17553   | complemer similar to Saccharomy                  | orf19.3546 | 17553 | IPF16996   | UNCLASSI molecular_function unknown                                                                              |
| CA2669 | 1.0 | 1.0 | 1.0 | IPF17494.3 | complemer unknown function, 3-prime              | end        | 17494 | IPF17553   | CELLULAF protein binding                                                                                         |
| CA2670 | 1.1 | 1.2 | 1.2 | MAK16      | 9569686..9 nuclear viral propagati               | orf19.5500 | 5859  | IPF17494.3 | No significant S.c. match                                                                                        |
| CA2671 | 0.9 | 0.6 | 1.0 | IPF5856    | 9571354..9 4-hydroxyphenylpruvz                  | orf19.5499 | 5856  | CaMAK16    | CELL CYC molecular_function unknown                                                                              |
| CA2672 | 0.9 | 0.8 | 1.0 | EFH1       | complemer Transcription regulator                | orf19.5498 | 5855  | IPF5856    | No significant S.c. match                                                                                        |
| CA2673 | 0.9 | 1.0 | 0.9 | IPF5849    | 9580118..9 unknown function                      | orf19.5496 | 5849  | CaEFH1     | TRANSCRIPTION CELLULAR COMMUNICATION/SIGNAL TRANSDUCTION MECHANISM CELL FATE SUBCELLULAR LOCALISATION            |
| CA2674 | 1.0 | 0.9 | 0.9 | IPF5846    | complemer unknown function                       | orf19.5495 | 5846  | IPF5849    | TRANSPORT FACILITATION                                                                                           |
| CA2675 | 1.2 | 0.9 | 1.7 | GSP1       | 9589303..9 GTP-binding protein (b                | orf19.5493 | 5839  | IPF5846    | UNCLASSIFIED PROTEINS                                                                                            |
| CA2676 | 1.1 | 1.1 | 1.1 | YHC1       | complemer SMALL NUCLEAR RIE                      | orf19.5492 | 5838  | CaGSP1     | TRANSCR hydrolase activity                                                                                       |
| CA2677 | 1.1 | 1.3 | 1.1 | ATP14.EX   | 9591635..9 F1FO-ATPase complex, subunit          | h          | 5835  | CaYHC1     | TRANSCR RNA binding                                                                                              |
| CA2678 | 1.0 | 1.0 | 0.9 | IPF5834    | 9592274..9 unknown function                      | orf19.1294 | 5834  | CaATP14.ε  | ENERGY † transporter activity                                                                                    |
| CA2679 | 1.1 | 1.3 | 1.1 | IFU5       | 9594892..9 Unknown function                      | orf19.2568 | 19956 | IPF5834    | CELL CYCLE AND DNA PROCESSING CONTROL OF CELLULAR ORGANIZATION SUBCELLULAR LOCALISATION                          |
| CA2680 | 1.0 | 1.0 | 0.9 | MC14       | 9595886..9 NADH dehydrogenase                    | orf19.2570 | 2728  | CaIFU5     | UNCLASSI molecular_function unknown                                                                              |
| CA2681 | 1.0 | 1.2 | 1.1 | SEC4       | complemer GTP-binding protein                    | orf19.2571 | 2730  | CaMC14     | No significant S.c. match                                                                                        |
| CA2682 | 1.0 | 0.9 | 1.0 | FRS1       | complemer Phenylalanyl-tRNA syr                  | orf19.2573 | 2731  | CaSEC4     | CELLULAF hydrolase activity                                                                                      |

|        |     |     |     |            |                                                 |             |       |            |                                                                                               |
|--------|-----|-----|-----|------------|-------------------------------------------------|-------------|-------|------------|-----------------------------------------------------------------------------------------------|
| CA2683 | 1.0 | 1.1 | 1.0 | IFU4       | complemer Unknown function                      | orf19.2574  | 2734  | CaFRS1     | PROTEIN lligase activity                                                                      |
| CA2684 | 1.0 | 1.0 | 1.0 | IFU3       | 9603952..9 Unknown function                     | orf19.2575  | 2736  | CaIFU4     | UNCLASSI molecular_function unknown                                                           |
| CA2685 | 0.9 | 0.9 | 0.9 | MSH4       | complemer DNA mismatch repair                   | orf19.2579  | 2741  | CaIFU3     | CLASSIFIC molecular_function unknown                                                          |
| CA2686 | 1.0 | 0.8 | 0.9 | HST2       | complemer Transcription regulator               | orf19.2580  | 2743  | CaMSH4     | CELL CYC DNA binding                                                                          |
| CA2687 | 1.0 | 1.0 | 1.1 | IFU6.3F    | complemer Unknown function, 3-p                 | orf19.1011: | 18435 | CaHST2     | TRANSCR hydrolase activity                                                                    |
| CA2688 | 1.1 | 1.1 | 1.1 | IFU6.5F    | complemer Putative ortholog of S.               | orf19.2581  | 2744  | CaIFU6.3f  | No significant S.c. match                                                                     |
| CA2689 | 1.0 | 0.9 | 1.0 | IFU2       | 9610078..9 Unknown function                     | orf19.2582  | 2746  | CaIFU6.5f  | Metabolism of vitamins cofactors and prosthetic groups                                        |
| CA2690 | 1.0 | 1.0 | 1.0 | PTR2.EXO   | complemer Peptide transporter for di- and tript |             | 2747  | CaIFU2     | UNCLASSI molecular_function unknown                                                           |
| CA2691 | 0.9 | 0.8 | 1.0 | PTR2.EXO   | complemer Peptide transporter for               | orf19.2583  | 2749  | CaPTR2.e)  | No significant S.c. match                                                                     |
| CA2692 | 1.0 | 1.1 | 1.0 | IPF9173.3f | complemer similar to Saccharomy                 | orf19.1024  | 10250 | CaPTR2.e)  | CELLULAR TRANSPORT AND TRANSPORT MECHANISMS SUBCELLULAR LOCALISATION TRANSPORT FACILITATION   |
| CA2693 | 1.1 | 1.1 | 1.1 | IPF9173.5f | complemer similar to Saccharomy                 | orf19.1024' | 9173  | IPF9173.3f | PROTEIN FATE [folding modification destination] ""CELLULAR TRANSPORT AND TRANSPORT MECHANISMS |
| CA2694 | 1.1 | 1.0 | 1.0 | IPF9171    | complemer unknown function                      | orf19.1024  | 9171  | IPF9173.5f | PROTEIN l molecular_function unknown                                                          |
| CA2695 | 1.1 | 1.2 | 1.0 | IPF9070    | 9624821..9 similar to Saccharomy                | orf19.2735  | 9170  | IPF9171    | CLASSIFICATION NOT YET CLEAR-CUT                                                              |
| CA2696 | 1.1 | 1.0 | 1.1 | IPF9169    | 9626418..9 similar to Saccharomy                | orf19.2736  | 9169  | IPF9070    | TRANSCR RNA binding                                                                           |
| CA2697 | 2.3 | 2.1 | 1.5 | IPF9167    | 9627997..9 unknown function                     | orf19.2737  | 9167  | IPF9169    | TRANSCR transcription regulator activity                                                      |
| CA2698 | 1.0 | 0.9 | 1.0 | SUL1       | 9632399..9 High-affinity sulfate tra            | orf19.1025: | 14417 | IPF9167    | UNCLASSIFIED PROTEINS                                                                         |
| CA2699 | 1.0 | 1.0 | 1.0 | RLF2       | 9635300..9 chromatin assembly cc                | orf19.1025: | 19958 | CaSUL1     | Amino acid transporter activity                                                               |
| CA2700 | 1.0 | 0.9 | 1.0 | IPF14414.f | 9637300..9 unknown function, exo                | orf19.1025: | 17364 | CaRLF2     | CELL CYC molecular_function unknown                                                           |
| CA2701 | 1.0 | 0.9 | 0.9 | IPF14414.f | 9638870..9 unknown function, exo                | orf19.1025: | 15360 | IPF14414.ε | No significant S.c. match                                                                     |
| CA2702 | 1.0 | 1.0 | 1.1 | EMP70      | 9644624..9 Endosomal protein (by                | orf19.1026  | 14444 | IPF14414.ε | TRANSCRIPTION SUBCELLULAR LOCALISATION                                                        |
| CA2703 | 1.0 | 1.0 | 1.0 | IPF12193   | 9653983..9 unknown function                     | orf19.4655  | 12193 | CaEMP70    | CELLULAF transporter activity                                                                 |
| CA2704 | 0.9 | 0.8 | 1.0 | IPF12195   | complemer unknown function                      | orf19.4656  | 12195 | IPF12193   | TRANSPORT FACILITATION                                                                        |
| CA2705 | 1.1 | 1.0 | 0.9 | NEM1       | complemer required for nuclear mc               | orf19.4657  | 12196 | IPF12195   | No significant S.c. match                                                                     |
| CA2706 | 0.9 | 0.8 | 0.9 | IPF11006   | complemer unknown function                      | orf19.4658  | 11006 | CaNEM1     | CELL CYC molecular_function unknown                                                           |
| CA2707 | 1.0 | 1.0 | 1.0 | IPF11003   | 9666525..9 by homology pre-mrna                 | orf19.4659  | 11003 | IPF11006   | UNCLASSIFIED PROTEINS                                                                         |
| CA2708 | 1.9 | 2.0 | 1.2 | RPS6A      | complemer ribosomal protein S6 (l               | orf19.4660  | 11001 | IPF11003   | TRANSCR RNA binding                                                                           |
| CA2709 | 1.0 | 1.0 | 1.0 | IPF4828    | complemer by homology to S. cere                | orf19.4662  | 4828  | CaRPS6A    | PROTEIN l structural molecule activity                                                        |
| CA2710 | 0.9 | 1.0 | 1.1 | IPF7403    | complemer unknown function                      | orf19.4664  | 7403  | IPF4828    | TRANSCR DNA binding                                                                           |
| CA2711 | 1.1 | 1.0 | 0.9 | TFB3       | complemer Transcription/repair fac              | orf19.8198  | 18427 | IPF7403    | UNCLASSI molecular_function unknown                                                           |
| CA2712 | 0.8 | 0.7 | 1.1 | SPE2       | complemer by homology to S. cere                | orf19.8199  | 11572 | CaTFB3     | CELL CYC transcription regulator activity                                                     |
| CA2713 | 0.9 | 0.9 | 1.0 | IFF8       | 9680874..9 unknown function                     | orf19.570   | 11578 | CaSPE2     | Secondary lyase activity                                                                      |
| CA2714 | 1.1 | 1.1 | 1.0 | IFF2       | 9687390..9 unknown function                     | orf19.575   | 7360  | CaIFF8     | No significant S.c. match                                                                     |
| CA2715 | 1.0 | 1.0 | 1.0 | CTF8       | 9691912..9 putative) kinetochore                | porf19.576  | 7354  | CaIFF2     | UNCLASSIFIED PROTEINS                                                                         |
| CA2716 | 1.0 | 1.1 | 0.9 | IPF7353    | complemer unknown function                      | orf19.577   | 7353  | CaCTF8     | UNCLASSI molecular_function unknown                                                           |
| CA2717 | 1.0 | 1.0 | 1.1 | MSB3       | 9696404..9 GTPase-activating pro                | orf19.8209  | 7351  | IPF7353    | UNCLASSI molecular_function unknown                                                           |
| CA2718 | 1.0 | 1.1 | 1.0 | IPF7374    | 9704761..9 unknown function                     | orf19.1084' | 7374  | CaMSB3     | UNCLASSI enzyme regulator activity                                                            |
| CA2719 | 1.0 | 1.1 | 1.0 | SOD2       | complemer Manganese-superoxidi                  | orf19.3340  | 7368  | IPF7374    | No significant S.c. match                                                                     |
| CA2720 | 0.9 | 1.0 | 1.0 | IPF7366    | complemer Arginyl-tRNA syntheta:                | orf19.3341  | 7366  | CaSOD2     | CELL RES oxidoreductase activity                                                              |
| CA2721 | 1.0 | 1.1 | 0.9 | IPF4799    | 9714328..9 unknown Function                     | orf19.3342  | 4799  | IPF7366    | PROTEIN l ligase activity                                                                     |
| CA2722 | 1.0 | 1.0 | 1.0 | IPF4801    | 9716406..9 similar to Saccharomy                | orf19.3344  | 4801  | IPF4799    | UNCLASSI molecular_function unknown                                                           |
| CA2723 | 1.0 | 1.0 | 1.0 | IPF4805    | 9718368..9 unknown Function                     | orf19.3345  | 4805  | IPF4801    | PROTEIN l molecular_function unknown                                                          |
| CA2724 | 1.0 | 1.0 | 1.0 | RPB7       | complemer DNA-directed RNA pol                  | orf19.1085: | 4809  | IPF4805    | PROTEIN l ligase activity                                                                     |
| CA2725 | 1.1 | 1.2 | 1.1 | MRPL23A    | 9724136..9 mitochondrial ribosom:               | orf19.1085: | 4810  | CaRPB7     | TRANSCR nucleotidyltransferase activity                                                       |
| CA2727 | 1.2 | 1.2 | 1.1 | IPF10318   | complemer similar to Saccharomy                 | orf19.2119  | 10318 | CaMRPL2:   | PROTEIN l structural molecule activity                                                        |
| CA2728 | 0.9 | 1.0 | 1.0 | IPF10322   | 9728491..9 putative mitochondrial               | orf19.9665  | 10322 | IPF10318   | CELL CYC DNA binding,transcription regulator activity                                         |
| CA2729 | 0.9 | 1.0 | 1.0 | NAT2       | complemer N-acetyltransferase for               | orf19.9664  | 10323 | IPF10322   | Nucleotide transporter activity                                                               |
| CA2730 | 1.0 | 1.0 | 1.0 | IPF10325   | complemer molybdopterin-converti                | orf19.9663  | 10325 | CaNAT2     | PROTEIN l transferase activity                                                                |
| CA2731 | 0.9 | 0.9 | 0.9 | URIC       | complemer uricase (urate oxidase)               | orf19.2114  | 10326 | IPF10325   | Metabolism molecular_function unknown                                                         |
| CA2732 | 1.0 | 1.1 | 1.0 | IPF10327   | complemer unknown function                      | orf19.2113  | 10327 | CaURIC     | No significant S.c. match                                                                     |
| CA2733 | 1.0 | 1.0 | 1.0 | PRP18      | 9734529..9 U5 snRNA-associated                  | orf19.2112  | 10329 | IPF10327   | UNCLASSI molecular_function unknown                                                           |
| CA2734 | 1.0 | 1.2 | 1.1 | RPL38      | 9735515..9 ribosomal protein L38 (by homolo     |             | 10330 | CaPRP18    | TRANSCR protein binding                                                                       |
| CA2735 | 1.1 | 1.1 | 1.0 | TFG2       | complemer transcription initiation f.           | orf19.2111  | 19765 | CaRPL38    | PROTEIN l structural molecule activity                                                        |
| CA2736 | 1.1 | 1.2 | 1.0 | ATE1       | 9737124..9 arginyl tRNA transfer:               | orf19.2110  | 15421 | CaTFG2     | TRANSCR transcription regulator activity                                                      |
| CA2737 | 1.0 | 0.8 | 1.0 | IPF15423   | complemer putative superoxide dis               | orf19.2108  | 15423 | CaATE1     | Amino acid transferase activity                                                               |
| CA2738 | 0.8 | 0.5 | 0.5 | STF2       | 9740300..9 ATP synthase regulatory factor (by   |             | 15425 | IPF15423   | No significant S.c. match                                                                     |
| CA2739 | 0.9 | 0.8 | 1.2 | MUQ1       | complemer choline phosphate cyti                | orf19.2107  | 10634 | CaSTF2     | PROTEIN l molecular_function unknown                                                          |
| CA2740 | 0.9 | 0.9 | 0.8 | IPF10633   | complemer unknown function                      | orf19.2106  | 10633 | CaMUQ1     | Lipid fatty-ε nucleotidyltransferase activity                                                 |
| CA2741 | 1.0 | 1.0 | 0.8 | IPF10632   | complemer unknown function                      | orf19.2105  | 10632 | IPF10633   | UNCLASSI molecular_function unknown                                                           |
| CA2742 | 0.9 | 0.9 | 0.8 | JAC1       | 9743500..9 molecular chaperone (                | orf19.2104  | 10631 | IPF10632   | UNCLASSI molecular_function unknown                                                           |
| CA2743 | 1.0 | 1.1 | 1.0 | CKB21      | complemer Casein kinase II, beta                | orf19.2102  | 10630 | CaJAC1     | ENERGY " chaperone activity                                                                   |
| CA2744 | 1.1 | 1.0 | 1.0 | IPF10626   | 9745477..9 unknown function                     | orf19.2101  | 10626 | CaCKB21    | TRANSCR protein kinase activity                                                               |
| CA2745 | 0.8 | 0.8 | 0.7 | HIR1       | complemer Histone transcription re              | orf19.9647  | 10625 | IPF10626   | UNCLASSI molecular_function unknown                                                           |
| CA2746 | 0.9 | 1.0 | 0.9 | IPF19766   | 9749207..9 unknown function                     | orf19.9646  | 19766 | CaHIR1     | TRANSCR transcription regulator activity                                                      |
| CA2747 | 0.9 | 0.8 | 0.9 | IPF11467   | complemer unknown function                      | orf19.2367  | 11467 | IPF19766   | Lipid fatty-acid and isoprenoid metabolism ""CONTROL OF CELLULAR ORGANIZATION                 |
| CA2748 | 1.0 | 1.0 | 0.9 | IPF11466   | 9756151..9 unknown function                     | orf19.2368  | 11466 | IPF11467   | UNCLASSI molecular_function unknown                                                           |
| CA2749 | 0.9 | 0.9 | 1.0 | IPF11465   | complemer unknown function                      | orf19.2369  | 11465 | IPF11466   | CELLULAF protein binding                                                                      |
| CA2750 | 1.0 | 1.0 | 1.0 | ATX1       | 9759522..9 antioxidant protein and metal hom    |             | 11464 | IPF11465   | CELL CYC DNA binding                                                                          |
| CA2751 | 1.0 | 0.9 | 0.9 | IPF19558   | complemer unknown function                      | orf19.2370  | 19558 | CaATX1     | CELL RES chaperone activity                                                                   |
| CA2752 | 1.0 | 1.0 | 0.9 | IPF6238    | 9768682..9 GAG protein of retrotra              | orf19.2374  | 6238  | IPF19558   | UNCLASSI molecular_function unknown                                                           |
| CA2753 | 1.0 | 1.0 | 1.0 | IPF16806   | 9772787..9 unknown function                     | orf19.1306: | 16806 | IPF6238    | No significant S.c. match                                                                     |
| CA2754 | 0.9 | 0.7 | 0.9 | VPS45      | complemer vacuolar protein sorti                | orf19.1306: | 12432 | IPF16806   | UNCLASSI protein binding                                                                      |
| CA2755 | 1.0 | 0.9 | 1.1 | IFA12      | 9777121..9 unknown function                     | orf19.1306: | 12435 | CaVPS45    | PROTEIN l chaperone activity                                                                  |

|        |     |     |     |          |                                             |             |       |           |                                                                                             |
|--------|-----|-----|-----|----------|---------------------------------------------|-------------|-------|-----------|---------------------------------------------------------------------------------------------|
| CA2756 | 1.0 | 1.2 | 1.0 | IPF18418 | 9779713..9 unknown function                 | orf19.1306i | 18418 | CaFA12    | No significant S.c. match                                                                   |
| CA2757 | 1.1 | 1.0 | 1.1 | IPF19767 | complemer unknown function                  | orf19.1306i | 19767 | IPF18418  | UNCLASSI:molecular_function unknown                                                         |
| CA2758 | 1.4 | 1.3 | 1.2 | GLC3     | complemer 1,4-glucon branching e            | orf19.1306i | 16449 | IPF19767  | UNCLASSI:molecular_function unknown                                                         |
| CA2759 | 0.9 | 0.9 | 0.9 | ARP4     | complemer actin-related protein (b          | orf19.1306i | 13789 | CaGLC3    | C-compour transferase activity                                                              |
| CA2760 | 1.0 | 1.9 | 1.1 | IPF13790 | complemer Unknown function                  | orf19.1307i | 13790 | CaARP4    | CONTROL DNA binding                                                                         |
| CA2761 | 0.9 | 1.0 | 0.7 | IPF15013 | 9793468..9 pyruvate decarboxylas            | orf19.1307  | 15013 | IPF13790  | No significant S.c. match                                                                   |
| CA2762 | 1.1 | 1.0 | 1.0 | IPF15012 | 9795542..9 pre mRNA splicing fact           | orf19.1307i | 15012 | IPF15013  | No significant S.c. match                                                                   |
| CA2763 | 1.0 | 1.1 | 1.1 | DIC1.3   | 9797980..9 dicarboxylate carrier pi         | orf19.5628  | 16773 | IPF15012  | UNCLASSI:RNA binding                                                                        |
| CA2764 | 0.9 | 1.0 | 0.6 | QCR7     | complemer ubiquinol--cytochrome-            | orf19.5629  | 16775 | CaDIC1.3  | Phosphate transporter activity                                                              |
| CA2765 | 1.0 | 1.1 | 1.0 | APA2     | complemer ATP adenyliltransferas            | orf19.1307i | 18417 | CaQCR7    | ENERGY " transporter activity,oxidoreductase activity                                       |
| CA2766 | 0.9 | 1.0 | 1.0 | IPF18416 | 9801246..9 unknown function                 | orf19.1307i | 18416 | CaAPA2    | Nucleotide hydrolase activity                                                               |
| CA2767 | 0.8 | 1.0 | 1.0 | TOA1     | complemer transcription initiation f        | orf19.2682  | 14884 | IPF18416  | No significant S.c. match                                                                   |
| CA2768 | 1.0 | 0.9 | 0.9 | IPF17011 | complemer similar to Saccharomy             | orf19.2684  | 17011 | CaTOA1    | TRANSCR transcription regulator activity                                                    |
| CA2769 | 1.9 | 3.0 | 2.9 | IPF15870 | complemer unknown function                  | orf19.2685  | 15870 | IPF17011  | CELL CYC molecular_function unknown                                                         |
| CA2770 | 1.0 | 1.1 | 1.0 | CPS1     | 9815697..9 Carboxypeptidase YSc             | orf19.2686  | 7980  | IPF15870  | No significant S.c. match                                                                   |
| CA2771 | 1.0 | 1.0 | 1.0 | RPB10    | complemer DNA-directed RNA polymerase II    | orf19.2688  | 7977  | CaCPS1    | Nitrogen ar peptidase activity                                                              |
| CA2772 | 1.0 | 1.1 | 0.9 | IPF20112 | 9818217..9 unknown function                 | orf19.2688  | 20112 | CaRPB10   | TRANSCR nucleotidyltransferase activity                                                     |
| CA2773 | 0.9 | 1.0 | 0.9 | MGM1     | complemer GTPase                            | orf19.2690  | 7974  | IPF20112  | CELL CYC RNA binding                                                                        |
| CA2774 | 1.1 | 1.0 | 1.1 | TFC4     | 9827896..9 transcription factor IIIC        | orf19.274   | 10122 | CaMGM1    | SUBCELLL hydrolase activity                                                                 |
| CA2775 | 0.9 | 0.9 | 1.0 | POP5     | 9831324..9 subunit of RNase P- lik          | orf19.275   | 10123 | CaTFC4    | TRANSCR transcription regulator activity                                                    |
| CA2776 | 0.8 | 0.9 | 0.8 | IPF10124 | complemer Alcohol acetyltransfera           | orf19.276   | 10124 | CaPOP5    | CELL CYC RNA binding                                                                        |
| CA2777 | 1.0 | 1.1 | 1.1 | THI6     | 9833961..9 thiamin-phosphate pyr            | orf19.277   | 10126 | IPF10124  | UNCLASSI:molecular_function unknown                                                         |
| CA2778 | 0.9 | 0.9 | 1.0 | MTR      | complemer neutral amino acid pen            | orf19.278   | 10127 | CaTHI6    | Metabolism transferase activity                                                             |
| CA2779 | 1.1 | 1.0 | 1.0 | IPF3836  | 9837627..9 unknown function                 | orf19.279   | 19768 | CaMTR     | UNCLASSIFIED PROTEINS                                                                       |
| CA2780 | 1.0 | 1.0 | 1.1 | IPF3831  | 9838807..9 unknown function                 | orf19.281   | 3798  | IPF3836   | UNCLASSI:hydrolase activity                                                                 |
| CA2781 | 1.0 | 0.9 | 1.2 | IPF3821  | 9840046..9 unknown function                 | orf19.284   | 3805  | IPF3831   | No significant S.c. match                                                                   |
| CA2782 | 0.8 | 1.8 | 0.6 | IPF3806  | 9840952..9 unknown function                 | orf19.285   | 3806  | IPF3821   | No significant S.c. match                                                                   |
| CA2783 | 1.0 | 0.9 | 0.9 | IPF3808  | 9841819..9 unknown function                 | orf19.286   | 3808  | IPF3806   | UNCLASSI:molecular_function unknown                                                         |
| CA2784 | 1.0 | 1.0 | 1.0 | IPF3810  | complemer unknown function                  | orf19.287   | 3810  | IPF3808   | PROTEIN FATE [folding modification destination]                                             |
| CA2785 | 1.0 | 1.2 | 1.1 | MET13    | complemer Methylene tetrahydrofoc           | orf19.288   | 3814  | IPF3810   | No significant S.c. match                                                                   |
| CA2786 | 1.0 | 0.9 | 1.0 | KRE5.3EO | complemer UDP-glucose:glycopro              | orf19.290   | 3818  | CaMET13   | Amino acid structural molecule activity                                                     |
| CA2787 | 1.3 | 1.3 | 1.0 | EFG1     | 9858262..9 Enhanced filamentous             | orf19.8243  | 3577  | CaKRE5.3c | C-compour transferase activity                                                              |
| CA2788 | 0.7 | 0.4 | 0.9 | RAD26    | complemer DNA repair and recom              | orf19.8240  | 3569  | CaEFG1    | TRANSCR DNA binding,transcription regulator activity                                        |
| CA2789 | 0.6 | 0.7 | 0.5 | IPF3567  | 9865948..9 unknown function                 | orf19.606   | 3567  | CaRAD26   | CELL CYC hydrolase activity                                                                 |
| CA2790 | 1.0 | 0.9 | 1.0 | IPF3562  | 9869139..9 Unknown function                 | orf19.604   | 3562  | IPF3567   | UNCLASSI:molecular_function unknown                                                         |
| CA2791 | 1.1 | 0.9 | 0.9 | IMP4     | 9871684..9 Ribonucleoprotein (by            | orf19.603   | 3560  | IPF3562   | Metabolism of vitamins cofactors and prosthetic groups                                      |
| CA2792 | 1.0 | 1.0 | 1.0 | TRK1.3F  | complemer Potassium transporter,            | orf19.602   | 3559  | CaIMP4    | TRANSCR RNA binding                                                                         |
| CA2793 | 0.9 | 0.9 | 1.0 | TRK1.5F  | complemer Potassium transporter,            | orf19.8233  | 3557  | CaTRK1.3f | CELLULAR TRANSPORT AND TRANSPORT MECHANISMS SUBCELLULAR LOCALISATION TRANSPORT FACILITATION |
| CA2794 | 1.0 | 0.9 | 0.9 | IPF8408  | 9887619..9 unknown function                 | orf19.1724  | 8408  | CaTRK1.5f | CELLULAF transporter activity                                                               |
| CA2795 | 1.0 | 0.9 | 1.0 | IPF8407  | 9888306..9 unknown function                 | orf19.1723  | 8407  | IPF8408   | No significant S.c. match                                                                   |
| CA2796 | 0.8 | 0.8 | 0.9 | IPF8405  | complemer similar to Saccharomy             | orf19.1721  | 8405  | IPF8407   | UNCLASSI:molecular_function unknown                                                         |
| CA2797 | 1.0 | 1.0 | 1.1 | IPF8404  | 9891254..9 putative helicase (by h          | orf19.1720  | 8404  | IPF8405   | CELLULAF molecular_function unknown                                                         |
| CA2798 | 1.0 | 0.9 | 1.0 | IPF8402  | complemer similar to Saccharomy             | orf19.1719  | 8402  | IPF8404   | CELL CYC helicase activity                                                                  |
| CA2799 | 0.9 | 0.7 | 1.0 | IPF19769 | 9899194..9 unknown function                 | orf19.1718  | 19769 | IPF8402   | C-compour hydrolase activity                                                                |
| CA2800 | 1.1 | 1.0 | 1.1 | IPF11366 | 9902499..9 unknown function                 | orf19.1717  | 11366 | IPF19769  | No significant S.c. match                                                                   |
| CA2801 | 1.0 | 1.0 | 1.0 | URA3     | complemer orotidine-5 -monophos             | orf19.1716  | 11364 | IPF11366  | No significant S.c. match                                                                   |
| CA2802 | 1.3 | 1.2 | 1.5 | IPF11363 | complemer unknown function                  | orf19.9283  | 11363 | CaURA3    | Nucleotide lyase activity                                                                   |
| CA2803 | 1.1 | 1.0 | 0.9 | IPF11711 | 9909449..9 ubiquitin-protein ligase         | orf19.5776  | 11711 | IPF11363  | No significant S.c. match                                                                   |
| CA2804 | 0.9 | 0.9 | 1.0 | IPF19961 | complemer unknown function                  | orf19.5777  | 19961 | IPF11711  | CELL CYC ligase activity                                                                    |
| CA2805 | 1.3 | 1.0 | 1.5 | RNR1     | 9914611..9 ribonucleoside-diphos            | orf19.5779  | 11704 | IPF19961  | UNCLASSI:molecular_function unknown                                                         |
| CA2806 | 1.0 | 0.9 | 0.9 | IPF11702 | 9918043..9 unknown function                 | orf19.5780  | 11702 | CaRNR1    | Nucleotide oxidoreductase activity                                                          |
| CA2807 | 0.8 | 0.8 | 0.8 | IPF11965 | 9920339..9 unknown function                 | orf19.5782  | 11965 | IPF11702  | UNCLASSI:molecular_function unknown                                                         |
| CA2808 | 0.9 | 1.0 | 0.9 | IPF11966 | complemer unknown function                  | orf19.5783  | 11966 | IPF11965  | UNCLASSI:hydrolase activity                                                                 |
| CA2809 | 0.9 | 1.0 | 0.9 | AMO1     | complemer amine oxidase (by hon             | orf19.5784  | 11969 | IPF11966  | UNCLASSI:molecular_function unknown                                                         |
| CA2810 | 1.1 | 1.3 | 1.3 | EFT2     | complemer translation elongation f          | orf19.5788  | 6840  | CaAMO1    | No significant S.c. match                                                                   |
| CA2811 | 0.9 | 1.0 | 1.2 | RPS10    | complemer Ribosomal protein 10              | orf19.1052i | 5347  | CaEFT2    | PROTEIN :structural regulator activity                                                      |
| CA2812 | 0.9 | 1.0 | 1.0 | TEM1     | 9937411..9 GTP-binding protein of           | orf19.1051i | 5346  | CaRPS10   | PROTEIN :structural molecule activity                                                       |
| CA2813 | 1.0 | 1.1 | 1.0 | ORC1     | 9938442..9 Origin recognition com           | orf19.1051i | 5612  | CaTEM1    | CELL CYC protein binding                                                                    |
| CA2814 | 1.1 | 1.2 | 1.0 | IPF5607  | 9941036..9 unknown function                 | orf19.2998  | 5607  | CaORC1    | CELL CYC DNA binding                                                                        |
| CA2815 | 1.0 | 1.0 | 1.0 | IPF5604  | complemer unknown function                  | orf19.2996  | 5604  | IPF5607   | UNCLASSI:molecular_function unknown                                                         |
| CA2816 | 1.0 | 1.1 | 1.0 | IPF5601  | complemer unknown function                  | orf19.2995  | 5601  | IPF5604   | CONTROL molecular_function unknown                                                          |
| CA2817 | 0.9 | 2.2 | 1.2 | RPS16.3  | complemer ribosomal protein, 3-prime end    | orf19.2994  | 5598  | IPF5601   | UNCLASSI:molecular_function unknown                                                         |
| CA2818 | 1.2 | 1.8 | 1.1 | RPL13    | 9948383..9 Ribosomal protein                | orf19.2994  | 5596  | CaRPS16.3 | PROTEIN :structural molecule activity                                                       |
| CA2819 | 2.1 | 1.2 | 1.8 | RPA1     | complemer 60S ribosomal protein             | orf19.2992  | 5594  | CaRPL13   | PROTEIN :structural molecule activity                                                       |
| CA2820 | 0.9 | 0.9 | 1.0 | HOL1     | complemer member of major facili            | orf19.2991  | 5592  | CaRPA1    | PROTEIN :structural molecule activity                                                       |
| CA2821 | 0.9 | 0.9 | 1.0 | CDR3.3EO | 9955198..9 Opaque-specific ABC transporter, | orf19.1314  | 17152 | CaHOL1    | CELL RESCUE DEFENSE AND VIRULENCE ""TRANSPORT FACILITATION                                  |
| CA2822 | 0.9 | 1.0 | 0.9 | IPF14550 | 9957534..9 unknown function                 | orf19.1314  | 17153 | CaCDR3.3  | SUBCELLULAR LOCALISATION TRANSPORT FACILITATION                                             |
| CA2823 | 1.0 | 1.0 | 1.0 | IPF14554 | 9960135..9 similar to Saccharomy            | orf19.1317  | 14554 | IPF14550  | UNCLASSIFIED PROTEINS                                                                       |
| CA2824 | 1.0 | 0.9 | 0.9 | IPF17888 | complemer unknown function                  | orf19.1318  | 17888 | IPF14554  | Lipid fatty-acid and isoprenoid metabolism                                                  |
| CA2825 | 1.0 | 0.9 | 1.1 | HWP1     | complemer Hyphal wall protein               | orf19.1321  | 12916 | IPF17888  | UNCLASSI:molecular_function unknown                                                         |
| CA2826 | 1.0 | 1.0 | 1.0 | APL6     | complemer AP-3 complex subunit,             | orf19.1323  | 12906 | CaHWP1    | C-compound and carbohydrate metabolism SUBCELLULAR LOCALISATION Hypha-specific              |
| CA2827 | 0.9 | 0.9 | 1.0 | RAD2     | complemer structure-specific nucle          | orf19.1324  | 19770 | CaAPL6    | CELLULAF molecular_function unknown                                                         |

|        |     |     |     |            |                                                |            |       |            |                                                                                                                   |
|--------|-----|-----|-----|------------|------------------------------------------------|------------|-------|------------|-------------------------------------------------------------------------------------------------------------------|
| CA2828 | 1.0 | 1.0 | 0.9 | IPF17026   | 9974890..9 unknown function                    | orf19.1325 | 17026 | CaRAD2     | CELL CYC DNA binding                                                                                              |
| CA2829 | 1.0 | 1.1 | 1.0 | IFA7       | complemer unknown function                     | orf19.1326 | 14593 | IPF17026   | Amino acid metabolism CELL CYCLE AND DNA PROCESSING CONTROL OF CELLULAR ORGANIZATION                              |
| CA2830 | 0.9 | 0.7 | 0.9 | RBT1       | 9982188..9 repressed by TUP1 pr                | orf19.1327 | 15385 | CaIFa7     | Nucleotide metabolism CELL CYCLE AND DNA PROCESSING CELLULAR COMMUNICATION/SIGNAL TRANSDUCTION MECHANISM          |
| CA2831 | 1.0 | 0.9 | 0.9 | IPF15706   | complemer unknown function                     | orf19.4783 | 15706 | CaRBT1     | Hypha-specific No significant S.c. match                                                                          |
| CA2832 | 0.9 | 1.0 | 1.0 | CRD1       | 9988871..9 Cu-transporting P1-tyr              | orf19.4784 | 19962 | IPF15706   | No significant S.c. match                                                                                         |
| CA2833 | 0.8 | 0.7 | 0.9 | PTC1       | complemer protein serine/threonin              | orf19.4785 | 19963 | CaCRD1     | REGULATION OF/INTERACTION WITH CELLULAR ENVIRONMENT SUBCELLULAR LOCALISATION TRANSPORT FACILITATION               |
| CA2834 | 0.9 | 1.0 | 1.0 | IPF12093   | 9994618..9 unknown function                    | orf19.4786 | 12093 | CaPTC1     | C-compour protein phosphatase activity                                                                            |
| CA2835 | 1.0 | 1.0 | 1.0 | IPF12091   | 9996734..9 Unknown function                    | orf19.4787 | 12091 | IPF12093   | UNCLASSIFIED PROTEINS                                                                                             |
| CA2836 | 1.1 | 1.1 | 1.1 | ARG5.6     | complemer acetylglutamate kinase               | orf19.4788 | 12088 | IPF12091   | CELL CYCLE AND DNA PROCESSING ""PROTEIN FATE [folding modification destination] ""CELLULAR TRANSPORT AND TRANSPOR |
| CA2837 | 1.0 | 1.0 | 1.0 | IPF8340    | complemer unknown function                     | orf19.4789 | 8340  | CaARG5.6   | Amino acid oxidoreductase activity,transferase activity                                                           |
| CA2838 | 1.2 | 1.1 | 1.1 | IPF8339    | complemer unknown function                     | orf19.4791 | 8339  | IPF8340    | No significant S.c. match                                                                                         |
| CA2839 | 1.2 | 1.2 | 1.1 | IPF8336    | complemer unknown function                     | orf19.4792 | 8336  | IPF8339    | No significant S.c. match                                                                                         |
| CA2841 | 0.9 | 1.0 | 1.0 | IPF12981   | 10012740..unknown function                     | orf19.5727 | 12981 | IPF8336    | No significant S.c. match                                                                                         |
| CA2842 | 1.0 | 0.9 | 1.0 | ALK5.3F    | complemer n-alkane-inducible cytochrome P-4    |            | 18405 | IPF12981   | No significant S.c. match                                                                                         |
| CA2843 | 1.0 | 1.1 | 0.9 | ALK5.5F    | complemer n-alkane-inducible cytc              | orf19.5728 | 13156 | CaALK5.3f  | CELL RESCUE DEFENSE AND VIRULENCE ""CELL FATE CONTROL OF CELLULAR ORGANIZATION                                    |
| CA2844 | 0.9 | 1.0 | 0.9 | IPF13158   | 10021410..unknown function                     | orf19.5729 | 13158 | CaALK5.5f  | CELL RESCUE DEFENSE AND VIRULENCE ""CELL FATE CONTROL OF CELLULAR ORGANIZATION                                    |
| CA2845 | 1.0 | 0.9 | 1.0 | IPF10782   | complemer unknown function                     | orf19.5730 | 10782 | IPF13158   | Amino acid metabolism TRANSCRIPTION SUBCELLULAR LOCALISATION                                                      |
| CA2846 | 1.0 | 1.0 | 0.9 | PAD1       | 10025559..phenylacrylic acid dec               | orf19.5731 | 10783 | IPF10782   | UNCLASSI molecular_function unknown                                                                               |
| CA2847 | 0.9 | 1.0 | 1.0 | IPF10785.f | 10026553.. unknown function, exo               | orf19.5732 | 10785 | CaPAD1     | CELL RES lyase activity                                                                                           |
| CA2848 | 1.0 | 1.1 | 1.0 | IPF10785.f | 10028105..unknown function, exo                | orf19.5733 | 10786 | IPF10785.ε | UNCLASSI hydrolase activity                                                                                       |
| CA2849 | 1.0 | 1.0 | 1.0 | POP2       | complemer required for glucose de              | orf19.5734 | 10787 | IPF10785.ε | UNCLASSIFIED PROTEINS                                                                                             |
| CA2850 | 1.0 | 1.1 | 1.0 | CDC50      | complemer cell division cycle muta             | orf19.5735 | 10789 | CaPOP2     | C-compour RNA binding                                                                                             |
| CA2852 | 1.0 | 0.9 | 0.9 | ALS5       | complemer agglutinin-like protein              | orf19.5736 | 19771 | CaCDC50    | CELL CYC transcription regulator activity                                                                         |
| CA2853 | 0.7 | 0.5 | 0.9 | IPF17057   | 10043344..unknown function                     | orf19.1070 | 17057 | CaALS5     | CELL FATE SUBCELLULAR LOCALISATION Other virulence attributes                                                     |
| CA2854 | 1.3 | 1.8 | 1.0 | RPN4       | complemer 26S proteasome subur                 | orf19.1069 | 7070  | IPF17057   | UNCLASSI molecular_function unknown                                                                               |
| CA2855 | 1.0 | 1.0 | 1.0 | GPM2       | complemer phosphoglycerate mut                 | orf19.1067 | 7065  | CaRPN4     | PROTEIN I peptidase activity                                                                                      |
| CA2856 | 1.1 | 1.0 | 1.1 | IPF7062    | 10050750..unknown function                     | orf19.1066 | 7062  | CaGPM2     | C-compound and carbohydrate metabolism ENERGY SUBCELLULAR LOCALISATION                                            |
| CA2857 | 1.0 | 1.0 | 1.0 | SSA1       | 10052114..Heat shock protein of t              | orf19.1065 | 7060  | IPF7062    | UNCLASSI molecular_function unknown                                                                               |
| CA2858 | 0.4 | 0.6 | 0.7 | ACS2       | 10056401..acetyl-coenzyme-A syr                | orf19.1064 | 7057  | CaSSA1     | CELL RESCUE DEFENSE AND VIRULENCE ""SUBCELLULAR LOCALISATION                                                      |
| CA2859 | 1.0 | 1.0 | 1.0 | IPF7056    | 10058692.. unknown function                    | orf19.1063 | 7056  | CaACS2     | C-compour ligase activity                                                                                         |
| CA2860 | 1.0 | 1.0 | 1.1 | IPF7054    | 10060272.. unknown function                    | orf19.1062 | 7054  | IPF7056    | UNCLASSI molecular_function unknown                                                                               |
| CA2861 | 1.7 | 2.4 | 2.3 | HHT21      | complemer Histone H3                           | orf19.1061 | 7053  | IPF7054    | No significant S.c. match                                                                                         |
| CA2862 | 2.7 | 1.5 | 3.1 | HHF21      | 10063170..histone H4                           | orf19.1059 | 7050  | CaHHT21    | TRANSCR DNA binding                                                                                               |
| CA2863 | 1.3 | 1.2 | 1.1 | IPF20117   | complemer unknown function                     | orf19.1058 | 20117 | CaHHF21    | TRANSCR DNA binding                                                                                               |
| CA2864 | 1.1 | 1.0 | 1.1 | IPF17234.ε | 10065092.. unknown function, 3-pr              | orf19.1057 | 17234 | IPF20117   | UNCLASSI peptidase activity                                                                                       |
| CA2866 | 1.2 | 1.2 | 1.1 | RHO1       | complemer GTP-binding protein of               | orf19.2843 | 11690 | IPF17234.ε | No significant S.c. match                                                                                         |
| CA2867 | 1.0 | 0.9 | 1.0 | IPF11688   | 10079064..similar to Saccharomy                | orf19.2844 | 11688 | CaRHO1     | C-compour signal transducer activity                                                                              |
| CA2868 | 1.0 | 1.0 | 1.2 | IPF20118   | 10082128.. unknown function                    | orf19.2846 | 20118 | IPF11688   | PROTEIN I protein binding                                                                                         |
| CA2869 | 1.1 | 1.0 | 1.0 | RPC82      | complemer DNA-directed RNA pol                 | orf19.2847 | 15457 | IPF20118   | No significant S.c. match                                                                                         |
| CA2870 | 0.9 | 1.0 | 1.0 | OPT2.53F   | 10084983..Oligopeptide transporter, internal f |            | 17923 | CaRPC82    | TRANSCR nucleotidyltransferase activity                                                                           |
| CA2871 | 0.9 | 0.9 | 1.1 | OPT2.3F    | 10085454..Oligopeptide transport               | orf19.2847 | 17924 | CaOPT2.5:3 | TRANSPORT FACILITATION                                                                                            |
| CA2872 | 0.9 | 1.1 | 1.0 | APG13      | 10088575..probable component o                 | orf19.2848 | 10707 | CaOPT2.3f  | TRANSPORT FACILITATION                                                                                            |
| CA2873 | 1.1 | 1.2 | 1.0 | AQY1       | complemer similarity to plasma me              | orf19.2849 | 10705 | CaAPG13    | PROTEIN I protein binding                                                                                         |
| CA2874 | 1.1 | 1.1 | 1.1 | IPF4999    | 10101550..unknown function                     | orf19.5843 | 4999  | CaAQY1     | TRANSPO transporter activity                                                                                      |
| CA2875 | 0.9 | 0.9 | 1.0 | MEI5       | 10105914..meiotic protein (by hon              | orf19.5844 | 17969 | IPF4999    | No significant S.c. match                                                                                         |
| CA2876 | 1.1 | 1.1 | 1.0 | RNR2       | 10106787..Ribonucleotide reduct                | orf19.5845 | 3774  | CaMEI5     | CELL CYC molecular_function unknown                                                                               |
| CA2877 | 0.9 | 0.8 | 0.9 | TFB2       | complemer Transcription/repair fac             | orf19.5846 | 3776  | CaRNR2     | Nucleotide metabolism CELL CYCLE AND DNA PROCESSING                                                               |
| CA2878 | 0.9 | 0.9 | 0.8 | RET1       | 10111192..DNA-directed RNA pol                 | orf19.5847 | 3777  | CaTFB2     | CELL CYC transcription regulator activity                                                                         |
| CA2879 | 1.5 | 1.5 | 1.1 | IPF3779    | 10115248.. unknown function                    | orf19.5848 | 3779  | CaRET1     | TRANSCR nucleotidyltransferase activity                                                                           |
| CA2880 | 0.9 | 0.9 | 1.0 | IPF3781    | 10117617.. unknown function                    | orf19.5849 | 3781  | IPF3779    | UNCLASSIFIED PROTEINS                                                                                             |
| CA2881 | 1.0 | 1.0 | 0.9 | RAD4       | complemer Excision repair protein              | orf19.5850 | 3784  | IPF3781    | TRANSCR DNA binding,transcription regulator activity                                                              |
| CA2882 | 1.1 | 1.0 | 1.0 | STE13      | complemer type IV dipeptidyl amin              | orf19.5851 | 3786  | CaRAD4     | CELLULAF molecular_function unknown                                                                               |
| CA2883 | 0.9 | 0.8 | 0.9 | IPF3790    | 10125186.. unknown function                    | orf19.5852 | 3790  | CaSTE13    | PROTEIN I peptidase activity                                                                                      |
| CA2884 | 1.0 | 1.0 | 1.0 | IPF7201    | complemer similar to Saccharomy                | orf19.2476 | 7201  | IPF3790    | CELLULAR TRANSPORT AND TRANSPORT MECHANISMS SUBCELLULAR LOCALISATION                                              |
| CA2885 | 0.9 | 0.9 | 0.9 | IPF7204    | complemer unknown function                     | orf19.2475 | 7204  | IPF7201    | CONTROL molecular_function unknown                                                                                |
| CA2886 | 1.1 | 1.0 | 1.0 | IPF7207    | 10141237..unknown function                     | orf19.2473 | 7207  | IPF7204    | No significant S.c. match                                                                                         |
| CA2887 | 1.0 | 0.9 | 1.0 | IPF13631   | complemer unknown function                     | orf19.2472 | 13631 | IPF7207    | UNCLASSI DNA binding                                                                                              |
| CA2888 | 0.9 | 0.8 | 1.0 | GIM5       | 10144589..Gim complex compone                  | orf19.2471 | 13630 | IPF13631   | No significant S.c. match                                                                                         |
| CA2889 | 1.0 | 1.0 | 0.9 | IPF13628   | complemer putative DNA repair pr               | orf19.2469 | 13628 | CaGIM5     | PROTEIN I protein binding                                                                                         |
| CA2890 | 1.0 | 1.0 | 1.0 | IPF13626   | 10146672..Putative methyltransfe               | orf19.2468 | 13626 | IPF13628   | CELL CYC DNA binding                                                                                              |
| CA2891 | 1.1 | 1.0 | 1.2 | IFS4       | 10148151..Pirin protein (by homol              | orf19.2467 | 6686  | IPF13626   | UNCLASSI transferase activity                                                                                     |
| CA2892 | 1.0 | 0.9 | 0.9 | IPF6688    | 10149496.. unknown function                    | orf19.2465 | 6688  | CaIFS4     | No significant S.c. match                                                                                         |
| CA2893 | 1.0 | 0.9 | 1.0 | IFS3       | 10151006..Unknown function                     | orf19.2463 | 6690  | IPF6688    | No significant S.c. match                                                                                         |
| CA2894 | 0.9 | 0.7 | 1.0 | IFS2       | 10152524..Unknown function                     | orf19.2462 | 6691  | CaIFS3     | UNCLASSIFIED PROTEINS                                                                                             |
| CA2895 | 1.0 | 1.1 | 1.1 | IFS1       | 10154280.. Unknown function                    | orf19.2461 | 6694  | CaIFS2     | No significant S.c. match                                                                                         |
| CA2896 | 0.9 | 0.8 | 1.0 | IPF14981   | complemer unknown function                     | orf19.3483 | 14981 | CaIFS1     | UNCLASSIFIED PROTEINS                                                                                             |
| CA2897 | 1.0 | 1.1 | 1.1 | IPF14979   | complemer similar to Saccharomy                | orf19.3482 | 14979 | IPF14981   | UNCLASSI molecular_function unknown                                                                               |
| CA2898 | 0.8 | 0.8 | 0.9 | IPF15646   | complemer putative ATP-depende                 | orf19.3481 | 15646 | IPF14979   | Nucleotide hydrolase activity                                                                                     |
| CA2899 | 1.0 | 1.0 | 1.0 | IPF17681   | 10164782.. similar to Saccharomy               | orf19.3480 | 17681 | IPF15646   | UNCLASSI RNA binding,helicase activity                                                                            |
| CA2900 | 1.0 | 1.0 | 0.9 | NIP7       | complemer required for efficient 6C            | orf19.3478 | 11733 | IPF17681   | CLASSIFIC structural molecule activity                                                                            |
| CA2901 | 0.9 | 0.9 | 0.9 | PUS1       | 10167784..pseudouridine synthas                | orf19.3477 | 11730 | CaNIP7     | TRANSCR molecular_function unknown                                                                                |
| CA2902 | 0.9 | 1.2 | 0.8 | HRR25      | complemer casein kinase I (by hor              | orf19.3476 | 11729 | CaPUS1     | Nucleotide lyase activity                                                                                         |

|        |     |     |     |            |                                               |             |                  |                                                                                                                   |
|--------|-----|-----|-----|------------|-----------------------------------------------|-------------|------------------|-------------------------------------------------------------------------------------------------------------------|
| CA2903 | 1.2 | 0.9 | 1.2 | IPF11725   | complemer unknown function                    | orf19.1097! | 11725 CaHRR25    | CELL CYC protein kinase activity                                                                                  |
| CA2904 | 0.9 | 1.0 | 1.0 | IPF12049   | complemer unknown function                    | orf19.1097  | 12051 IPF11725   | No significant S.c. match                                                                                         |
| CA2905 | 1.0 | 1.0 | 1.0 | IPF15523   | complemer unknown function                    | orf19.4521  | 12049 CalPL1     | CELL CYC protein kinase activity                                                                                  |
| CA2906 | 1.0 | 1.1 | 1.1 | IPF15523   | complemer unknown function                    | orf19.4521  | 15523 IPF12049   | UNCLASSI molecular_function unknown                                                                               |
| CA2907 | 0.9 | 0.9 | 1.4 | IPF15525   | complemer putative gluconokinase              | orf19.4520  | 15525 IPF15523   | CLASSIFIC oxidoreductase activity                                                                                 |
| CA2908 | 1.0 | 1.0 | 1.1 | SUV3       | complemer ATP-dependent RNA t                 | orf19.4519  | 15527 IPF15525   | C-compour molecular_function unknown                                                                              |
| CA2909 | 1.1 | 1.0 | 0.9 | IPF11424   | 10190600..unknown function                    | orf19.4518  | 11424 CaSUV3     | Nucleotide RNA binding_helicase activity                                                                          |
| CA2910 | 1.1 | 1.0 | 1.0 | IPF11421   | 10193868..unknown function                    | orf19.4517  | 11421 IPF11424   | UNCLASSI protein kinase activity                                                                                  |
| CA2911 | 0.9 | 0.7 | 0.9 | MET7       | complemer folypolyglutamate synt              | orf19.4516  | 11419 IPF11421   | No significant S.c. match                                                                                         |
| CA2912 | 1.1 | 1.0 | 1.1 | IPF11206   | 10197825..unknown function                    | orf19.4515  | 11206 CaMET7     | Metabolism ligase activity                                                                                        |
| CA2913 | 1.0 | 1.0 | 1.0 | IPF11205   | 10199936..unknown function                    | orf19.4513  | 11205 IPF11206   | CELL RESCUE DEFENSE AND VIRULENCE ""CELL FATE                                                                     |
| CA2914 | 1.0 | 1.0 | 1.0 | IFA17.5F   | 10201694..unknown function, 5-pr              | orf19.4512  | 11203 IPF11205   | Lipid fatty-acid and isoprenoid metabolism ""CELL CYCLE AND DNA PROCESSING CELLULAR COMMUNICATION/SIGNAL TRANSDUC |
| CA2915 | 0.9 | 0.9 | 1.0 | IFA17.3F   | 10202423..unknown function, 3-pr              | orf19.4511  | 11201 CalFA17.5i | No significant S.c. match                                                                                         |
| CA2916 | 1.0 | 1.0 | 1.1 | IFA4       | 10204695..unknown function                    | orf19.4510  | 11199 CalFA17.3i | Nucleotide metabolism CELL CYCLE AND DNA PROCESSING CELLULAR COMMUNICATION/SIGNAL TRANSDUCTION MECHANISM          |
| CA2917 | 1.1 | 0.8 | 1.0 | IPF16173.1 | 10207753..Unknown function, 5-p               | orf19.4509  | 16177 CalFA4     | Nucleotide metabolism CELL CYCLE AND DNA PROCESSING CELLULAR COMMUNICATION/SIGNAL TRANSDUCTION MECHANISM          |
| CA2918 | 1.0 | 1.0 | 1.0 | IPF16173.2 | 10208060..unknown function, 3-pr              | orf19.4508  | 16174 IPF16173.1 | No significant S.c. match                                                                                         |
| CA2919 | 1.0 | 1.0 | 0.9 | IFA18.3    | 10208768..unknown function, 3-pr              | orf19.4507  | 16173 IPF16173.2 | No significant S.c. match                                                                                         |
| CA2920 | 2.1 | 3.1 | 1.4 | FET5       | complemer multicopy oxidase (by l             | orf19.4215  | 17039 CalFA18.3  | Nucleotide metabolism CELL CYCLE AND DNA PROCESSING CELLULAR COMMUNICATION/SIGNAL TRANSDUCTION MECHANISM          |
| CA2921 | 1.0 | 0.9 | 1.0 | IPF17037   | complemer unknown function                    | orf19.4214  | 17037 CaFET5     | CELLULAR TRANSPORT AND TRANSPORT MECHANISMS REGULATION OF/INTERACTION WITH CELLULAR ENVIRONMENT SUB               |
| CA2922 | 1.0 | 1.0 | 1.1 | FET31      | complemer cell surface ferroxidase            | orf19.1168! | 17035 IPF17037   | ENERGY                                                                                                            |
| CA2923 | 1.2 | 1.2 | 1.3 | FET32      | complemer cell surface ferroxidase            | orf19.1168! | 11905 CaFET31    | CELLULAR TRANSPORT AND TRANSPORT MECHANISMS REGULATION OF/INTERACTION WITH CELLULAR ENVIRONMENT SUB               |
| CA2924 | 1.5 | 1.4 | 1.2 | FET33      | complemer cell surface ferroxidase            | orf19.1168! | 11908 CaFET32    | CELLULAR TRANSPORT AND TRANSPORT MECHANISMS REGULATION OF/INTERACTION WITH CELLULAR ENVIRONMENT SUB               |
| CA2925 | 1.0 | 1.0 | 1.0 | IPF7827    | 10229638..unknown function                    | orf19.4210  | 7827 CaFET33     | CELLULAF oxidoreductase activity                                                                                  |
| CA2926 | 1.0 | 1.0 | 1.1 | UBA3       | complemer Ubiquitin-like protein a            | orf19.4209  | 7830 IPF7827     | UNCLASSI molecular_function unknown                                                                               |
| CA2927 | 0.9 | 0.9 | 1.0 | RAD52      | complemer Nuclear ribonucleoprot              | orf19.4208  | 7833 CaUBA3      | PROTEIN FATE [folding modification destination]                                                                   |
| CA2928 | 1.0 | 1.0 | 0.9 | SME1       | complemer Nuclear ribonucleoprotein E         |             | 7835 CaRAD52     | CELL CYC DNA binding                                                                                              |
| CA2929 | 0.9 | 1.1 | 1.0 | IPF7838    | 10235491..similar to Saccharomy               | orf19.4206  | 7838 CaSME1      | TRANSCR RNA binding                                                                                               |
| CA2930 | 0.9 | 0.9 | 0.7 | IPF7840    | 10237526..similar to Saccharomy               | orf19.4204  | 7840 IPF7838     | CELL CYC hydrolase activity                                                                                       |
| CA2931 | 1.0 | 0.9 | 0.8 | IPF7841    | 10238778..similar to Saccharomy               | orf19.4203  | 7841 IPF7840     | PROTEIN !structural molecule activity                                                                             |
| CA2932 | 1.0 | 1.1 | 1.1 | NHX1       | complemer NA+H+ antiporter                    | orf19.1167  | 7842 IPF7841     | CELL CYC structural molecule activity                                                                             |
| CA2933 | 1.0 | 0.9 | 1.0 | IPF11515   | 10249547..similar to Saccharomy               | orf19.3329  | 11515 CaNHX1     | CELLULAF transporter activity                                                                                     |
| CA2934 | 0.9 | 0.9 | 0.9 | IPF11521   | 10254612..unknown function                    | orf19.3328  | 11521 IPF11515   | Lipid fatty-:hydrolase activity                                                                                   |
| CA2935 | 1.1 | 1.1 | 1.1 | IPF8326    | 10256835..similar to Saccharomy               | orf19.3327  | 8326 IPF11521    | UNCLASSI transcription regulator activity                                                                         |
| CA2936 | 1.0 | 1.2 | 1.1 | RPS21B.3   | 10259199..ribosomal protein S21, 3-prime en   |             | 8325 IPF8326     | TRANSCR transferase activity                                                                                      |
| CA2937 | 1.8 | 1.4 | 1.3 | IPF8321    | 10261346..similar to Saccharomy               | orf19.3325  | 8321 CaRPS21E    | PROTEIN !structural molecule activity                                                                             |
| CA2938 | 1.1 | 1.2 | 1.0 | TIF1       | 10264139..translation initiation fac          | orf19.3324  | 8319 IPF8321     | C-compour transferase activity                                                                                    |
| CA2939 | 1.0 | 1.0 | 1.1 | IPF8318    | 10265728..unknown function                    | orf19.3323  | 8318 CaTIF1      | PROTEIN !translation regulator activity                                                                           |
| CA2940 | 1.1 | 0.9 | 1.0 | CVB1       | complemer vacuole biogenesis coi              | orf19.1970  | 6289 IPF8318     | SUBCELLULAR LOCALISATION                                                                                          |
| CA2941 | 1.0 | 0.9 | 1.1 | IPF6291    | 10270806..Secretory Stress Resp               | orf19.1969  | 6291 CaCVB1      | No significant S.c. match                                                                                         |
| CA2942 | 0.9 | 1.0 | 1.0 | MAK31      | complemer Involved in stability of L-A dsRNA- |             | 6293 IPF6291     | No significant S.c. match                                                                                         |
| CA2943 | 1.0 | 3.8 | 1.0 | IPF6294    | 10272504..unknown function                    | orf19.1968  | 6294 CaMAK31     | No significc:transferase activity                                                                                 |
| CA2944 | 1.0 | 1.0 | 1.0 | IMG1       | complemer Ribosomal protein, mit              | orf19.1967  | 6295 IPF6294     | No significant S.c. match                                                                                         |
| CA2945 | 1.0 | 1.0 | 1.0 | IPF6296    | complemer putative methyltransfer             | orf19.1966  | 6296 CalMG1      | ENERGY F structural molecule activity                                                                             |
| CA2946 | 1.1 | 1.0 | 1.0 | IPF6298    | complemer unknown function                    | orf19.1964  | 6298 IPF6296     | CLASSIFIC transferase activity                                                                                    |
| CA2947 | 1.1 | 1.1 | 1.0 | GDS1       | complemer nam9-1 suppressor (b)               | orf19.1963  | 6301 IPF6298     | No significant S.c. match                                                                                         |
| CA2948 | 1.0 | 1.0 | 1.0 | IPF14506   | complemer unknown function                    | orf19.9516  | 14506 CaGDS1     | CLASSIFIC molecular_function unknown                                                                              |
| CA2949 | 1.0 | 1.1 | 1.0 | CLN2       | complemer G1/S-SPECIFIC CYCL                  | orf19.9515  | 10874 IPF14506   | No significant S.c. match                                                                                         |
| CA2950 | 1.1 | 1.9 | 1.0 | SBP1       | 10299689..RNA binding protein-lik             | orf19.5854  | 10692 CaCLN2     | CELL CYC protein kinase activity,enzyme regulator activity                                                        |
| CA2951 | 1.1 | 1.0 | 1.1 | IPF19671   | 10301502..unknown function                    |             | 19671 CaSBP1     | TRANSCR RNA binding                                                                                               |
| CA2952 | 1.0 | 1.0 | 1.0 | MBP1       | complemer transcription factor (by            | orf19.5855  | 10688 IPF19671   | Lipid fatty-acid and isoprenoid metabolism ""SUBCELLULAR LOCALISATION TRANSPORT FACILITATION                      |
| CA2953 | 0.9 | 0.9 | 1.0 | IPF10685   | complemer unknown function                    | orf19.5856  | 10685 CaMBP1     | CELL CYC DNA binding                                                                                              |
| CA2954 | 1.0 | 1.1 | 1.1 | IPF15201   | 10306785..Unknown function                    | orf19.5857  | 15201 IPF10685   | SUBCELLULAR LOCALISATION                                                                                          |
| CA2955 | 1.0 | 1.2 | 1.1 | EGD2       | complemer Nascent polypeptide a:              | orf19.5858  | 15200 IPF15201   | No significant S.c. match                                                                                         |
| CA2956 | 0.9 | 1.1 | 1.0 | DAL53      | 10309893..allantoate permease (t              | orf19.5859  | 8598 CaEGD2      | C-compour chaperone activity                                                                                      |
| CA2957 | 1.0 | 1.1 | 1.0 | KRE9       | 10313399..cell wall synthesis prot            | orf19.5861  | 8595 CaDAL53     | CELLULAR TRANSPORT AND TRANSPORT MECHANISMS SUBCELLULAR LOCALISATION TRANSPORT FACILITATION                       |
| CA2958 | 0.9 | 0.9 | 0.8 | IPF8591    | 10315498..putative arginase famil             | orf19.5862  | 8591 CaKRE9      | C-compour molecular_function unknown                                                                              |
| CA2959 | 1.0 | 0.9 | 0.9 | IPF8590    | 10317643..unknown function                    | orf19.5863  | 8590 IPF8591     | Amino acid metabolism Nitrogen and sulphur metabolism SUBCELLULAR LOCALISATION                                    |
| CA2960 | 1.0 | 0.9 | 0.8 | URK1       | complemer uridine kinase (by hom              | orf19.5864  | 8589 IPF8590     | No significant S.c. match                                                                                         |
| CA2961 | 1.0 | 0.9 | 1.0 | PRP2       | 10320357..RNA-dependent ATPa:                 | orf19.5865  | 8587 CaURK1      | Nucleotide transferase activity                                                                                   |
| CA2962 | 1.0 | 1.0 | 1.0 | GRP3       | complemer dihydroflavonol-4-redu              | orf19.5611  | 13178 CaPRP2     | TRANSCR RNA binding_helicase activity                                                                             |
| CA2963 | 1.1 | 1.1 | 1.0 | IPF13176.1 | complemer ornithine carbamoyltra              | orf19.5610  | 13176 CaGRP3     | Metabolism oxidoreductase activity                                                                                |
| CA2964 | 1.0 | 0.9 | 1.0 | IPF13174   | complemer unknown function                    | orf19.5609  | 13174 IPF13176.2 | Amino acid transferase activity                                                                                   |
| CA2965 | 0.9 | 1.0 | 1.0 | RPC34      | 10334066..DNA-directed RNA pol                | orf19.5608  | 16279 IPF13174   | No significant S.c. match                                                                                         |
| CA2966 | 1.1 | 1.1 | 1.0 | IPF12513   | 10338043..unknown function                    | orf19.5605  | 12513 CaRPC34    | TRANSCR nucleotidyltransferase activity                                                                           |
| CA2967 | 1.1 | 1.1 | 1.0 | BMR1       | 10342240..benomyl/methothrexat                | orf19.5604  | 16346 IPF12513   | UNCLASSI protein binding                                                                                          |
| CA2968 | 1.1 | 1.1 | 1.1 | IPF19772   | 10345160..unknown function                    | orf19.5602  | 19772 CaBMR1     | CELL RES transporter activity                                                                                     |
| CA2969 | 0.9 | 1.0 | 1.0 | IPF14448   | 10347311..unknown function                    | orf19.5601  | 14448 IPF19772   | No significant S.c. match                                                                                         |
| CA2970 | 1.1 | 1.1 | 1.0 | MDL2.5F    | 10348887..ATP-binding transport               | orf19.5600  | 14449 IPF14448   | No significant S.c. match                                                                                         |
| CA2971 | 0.9 | 1.0 | 1.1 | MDL2.3F    | 10350636..ATP-binding transport               | orf19.5599  | 20121 CaMDL2.5i  | TRANSPORT FACILITATION                                                                                            |
| CA2972 | 1.2 | 1.2 | 1.2 | IPF14452.F | complemer F1-ATPase epsilon subunit (by ho    |             | 14452 CaMDL2.3i  | TRANSPORT FACILITATION                                                                                            |
| CA2973 | 0.9 | 0.9 | 1.0 | IPF12540   | 10359969..unknown function                    | orf19.8824  | 12540 IPF14452.r | No significant S.c. match                                                                                         |
| CA2974 | 1.2 | 1.1 | 1.2 | ARO9       | 10363904..aromatic amino acid ar              | orf19.8822  | 14677 IPF12540   | No significant S.c. match                                                                                         |



|        |     |     |     |            |                                             |             |                  |                                                                                                                 |
|--------|-----|-----|-----|------------|---------------------------------------------|-------------|------------------|-----------------------------------------------------------------------------------------------------------------|
| CA2976 | 1.2 | 1.4 | 1.0 | IPF14676   | 10365923..unknown function                  | orf19.8821  | 14676 CaARO9     | Amino acid transferase activity                                                                                 |
| CA2977 | 1.1 | 1.2 | 1.1 | HOM3       | complemer Aspartokinase (by hom             | orf19.1235  | 14675 IPF14676   | UNCLASSI molecular_function unknown                                                                             |
| CA2979 | 1.2 | 1.0 | 1.1 | ADE4       | complemer amidophosphoribosyltr             | orf19.1233  | 13283 CaHOM3     | Amino acid transferase activity                                                                                 |
| CA2980 | 0.9 | 0.9 | 1.2 | GOG5       | 10390348..GDP-mannose transp                | orf19.1232  | 13284 CaADE4     | Nucleotide transferase activity                                                                                 |
| CA2981 | 1.1 | 1.0 | 0.9 | CSE1.5F    | 10392640..Importin-beta-like prote          | orf19.1231  | 13285 CaGOG5     | CELLULAF transporter activity                                                                                   |
| CA2982 | 1.0 | 0.9 | 0.9 | CSE1.3F    | 10394151..Importin-beta-like prote          | orf19.8815  | 16520 CaCSE1.5I  | PROTEIN I protein binding                                                                                       |
| CA2983 | 1.0 | 1.1 | 0.9 | IPF18396   | complemer unknown function                  | orf19.8814  | 18396 CaCSE1.3I  | PROTEIN FATE [folding modification destination] ""CELLULAR TRANSPORT AND TRANSPORT MECHANISMS CONTROL OF CELLUL |
| CA2984 | 1.0 | 1.0 | 1.0 | IPF12606.1 | 10397204..unknown function, 3-prime end     |             | 5109 IPF18396    | No significant S.c. match                                                                                       |
| CA2985 | 1.0 | 1.0 | 1.0 | SET1       | 10399009..Chromatin regulatory p            | orf19.6009  | 5105 IPF12606.1  | UNCLASSIFIED PROTEINS                                                                                           |
| CA2986 | 1.0 | 1.1 | 1.1 | CDC5       | 10403402..Cell-cycle protein kinas          | orf19.6010  | 5102 CaSET1      | CELL CYC transferase activity                                                                                   |
| CA2987 | 1.0 | 1.0 | 1.1 | RPB11.3    | complemer DNA-directed RNA polymerase II    |             | 5100 CaCDC5      | CELL CYC protein kinase activity                                                                                |
| CA2988 | 1.0 | 1.0 | 1.0 | SIN3.EXO1  | 10407146..Histone deacetylase by homology   |             | 5097 CaRPB11.1   | TRANSCR nucleotidyltransferase activity                                                                         |
| CA2989 | 0.9 | 0.9 | 0.7 | SIN3.EXO1  | 10407748..Histone deacetylase b             | orf19.6011  | 5096 CaSIN3.ex   | Lipid fatty-acid and isoprenoid metabolism ""TRANSCRIPTION CELL FATE SUBCELLULAR LOCALISATION                   |
| CA2990 | 1.0 | 1.1 | 1.0 | IPF5092    | complemer unknown function                  | orf19.6012  | 5092 CaSIN3.ex   | Lipid fatty-: hydrolase activity                                                                                |
| CA2991 | 0.9 | 1.1 | 1.0 | IPF5088.3  | complemer unknown function, 3-pr            | orf19.6013  | 5088 IPF5092     | UNCLASSI molecular_function unknown                                                                             |
| CA2992 | 0.8 | 0.7 | 0.9 | RRS1       | complemer Regulator for ribosome            | orf19.6014  | 5085 IPF5088.3   | UNCLASSI molecular_function unknown                                                                             |
| CA2993 | 1.0 | 1.1 | 1.0 | IPF9118    | complemer unknown function                  | orf19.6118  | 9118 CaRRS1      | TRANSCR molecular_function unknown                                                                              |
| CA2994 | 1.0 | 1.0 | 1.1 | IPF9116    | 10425599..unknown function                  | orf19.6119  | 9116 IPF9118     | CELLULAF enzyme regulator activity                                                                              |
| CA2995 | 1.0 | 1.0 | 1.0 | IPF9113    | 10428585..unknown function                  | orf19.6121  | 9113 IPF9116     | No significant S.c. match                                                                                       |
| CA2996 | 0.9 | 1.0 | 1.0 | IPF9108    | complemer similar to Saccharomy             | orf19.6124  | 9108 IPF9113     | TRANSCR molecular_function unknown                                                                              |
| CA2997 | 0.9 | 0.9 | 0.8 | KGD2       | complemer 2-oxoglutarate dehydr             | orf19.6126  | 8851 IPF9108     | C-compour transcription regulator activity                                                                      |
| CA2998 | 1.0 | 3.4 | 1.0 | LPD1       | 10438250..dihydroliipoamide dehy            | orf19.6127  | 8847 CaKGD2      | C-compour molecular_function unknown                                                                            |
| CA2999 | 1.0 | 0.9 | 1.0 | MRPL8      | 10440104..mitochondrial 60s ribos           | orf19.6129  | 8844 CaLPD1      | Amino acid transporter activity                                                                                 |
| CA3000 | 1.0 | 1.0 | 1.5 | TSC1.5     | 10441073..3-ketosphinganine redi            | orf19.6131  | 8842 CaMRPL8     | PROTEIN :structural molecule activity                                                                           |
| CA3001 | 0.9 | 1.1 | 1.0 | IPF8841    | complemer unknown function                  | orf19.6132  | 8841 CaTSC1.5    | Lipid fatty-: oxidoreductase activity                                                                           |
| CA3002 | 0.9 | 0.8 | 1.0 | PIF1       | complemer mitochondrial DNA hel             | orf19.6133  | 19673 IPF8841    | UNCLASSI molecular_function unknown                                                                             |
| CA3003 | 0.9 | 0.9 | 0.9 | IPF15741   | 10448869..similar to Saccharomy             | orf19.1362I | 15741 CaPIF1     | CELL CYC DNA binding,helicase activity                                                                          |
| CA3004 | 1.0 | 0.9 | 1.0 | KIN28      | 10452289..cyclin-dependent ser/t            | orf19.1361I | 15293 IPF15741   | UNCLASSI molecular_function unknown                                                                             |
| CA3005 | 1.2 | 1.2 | 1.1 | CC43       | 10456995..Cell Division Control -li         | orf19.1361I | 19967 CaKIN28    | CELL CYC protein kinase activity,transcription regulator activity                                               |
| CA3006 | 0.9 | 1.0 | 1.0 | IPF12152   | complemer Unknown function                  | orf19.1361I | 12152 CaCC43     | CELL CYCLE AND DNA PROCESSING CELLULAR COMMUNICATION/SIGNAL TRANSDUCTION MECHANISM REGULATION OF/INTI           |
| CA3007 | 0.9 | 1.0 | 1.0 | IPF12148   | complemer Unknown function                  | orf19.1361I | 12148 IPF12152   | UNCLASSI molecular_function unknown                                                                             |
| CA3008 | 0.9 | 0.9 | 0.9 | IPF12147   | 10461455..unknown function                  | orf19.1361I | 12147 IPF12148   | UNCLASSI molecular_function unknown                                                                             |
| CA3009 | 1.0 | 1.0 | 1.1 | MRPL19     | complemer Ribosomal protein (by             | orf19.1361I | 14569 IPF12147   | UNCLASSI oxidoreductase activity                                                                                |
| CA3010 | 0.9 | 0.9 | 1.0 | IPF14568   | 10467495..unknown function                  | orf19.1361I | 14568 CaMRPL19   | PROTEIN :structural molecule activity                                                                           |
| CA3011 | 0.9 | 1.1 | 0.8 | CTA1       | 10470262..catalase A, peroxisom             | orf19.6229  | 20124 IPF14568   | UNCLASSI enzyme regulator activity                                                                              |
| CA3012 | 1.0 | 1.0 | 1.1 | IPF14013   | 10472451..unknown function                  | orf19.6227  | 14013 CaCTA1     | CELL RES oxidoreductase activity                                                                                |
| CA3013 | 1.1 | 1.2 | 1.0 | PET117     | complemer cytochrome c oxidase assembly fa  |             | 20125 IPF14013   | No significant S.c. match                                                                                       |
| CA3014 | 0.8 | 0.8 | 0.7 | IPF11915   | 10476184..similar to Saccharomy             | orf19.1360I | 11915 CaPET117   | PROTEIN I molecular_function unknown                                                                            |
| CA3015 | 1.1 | 0.9 | 1.0 | IPF10029   | 10480426..unknown function                  | orf19.1139I | 10029 IPF11915   | CLASSIFIC protein kinase activity,enzyme regulator activity                                                     |
| CA3016 | 1.1 | 1.1 | 1.0 | IPF10027   | 10482517..unknown function                  | orf19.1139I | 10027 IPF10029   | UNCLASSI molecular_function unknown                                                                             |
| CA3017 | 1.0 | 1.0 | 1.0 | IPF10021   | 10486002..unknown function                  | orf19.1139I | 10021 IPF10027   | PROTEIN SYNTHESIS CELL FATE SUBCELLULAR LOCALISATION                                                            |
| CA3018 | 1.1 | 1.2 | 1.1 | SAH1       | 10488537..S-adenosyl-L-homocys              | orf19.3911  | 10018 IPF10021   | Nitrogen ar DNA binding,transcription regulator activity                                                        |
| CA3019 | 1.2 | 1.0 | 1.1 | IPF15494   | complemer putative ribonuclease (           | orf19.3910  | 15494 CaSAH1     | Metabolism hydrolase activity                                                                                   |
| CA3020 | 1.7 | 1.1 | 1.4 | IPF15492   | complemer unknown function                  | orf19.3908  | 15492 IPF15494   | Nucleotide metabolism                                                                                           |
| CA3021 | 1.1 | 1.0 | 1.0 | IPF17640   | complemer unknown function                  | orf19.3906  | 17640 IPF15492   | CELL RESCUE DEFENSE AND VIRULENCE ""SUBCELLULAR LOCALISATION TRANSPORT FACILITATION UNCLASSIFIED PROTEI         |
| CA3022 |     |     |     | IPF17642   | complement(10495936..10496577)              |             | IPF17640         | No significant S.c. match                                                                                       |
| CA3023 | 0.9 | 0.9 | 0.9 | IPF11508   | 10497887..unknown function                  | orf19.3904  | 11508            |                                                                                                                 |
| CA3024 | 0.9 | 0.9 | 1.0 | IPF11506   | complemer unknown function                  | orf19.3903  | 11506 IPF11508   | CELL RESCUE DEFENSE AND VIRULENCE                                                                               |
| CA3025 | 0.9 | 0.9 | 0.8 | IPF11503   | complemer unknown function                  | orf19.3902  | 11503 IPF11506   | Lipid fatty-acid and isoprenoid metabolism ""SUBCELLULAR LOCALISATION                                           |
| CA3026 | 1.0 | 1.0 | 0.9 | IPF11499.f | complemer unknown function                  | orf19.1138I | 11499 IPF11503   | CELLULAR TRANSPORT AND TRANSPORT MECHANISMS                                                                     |
| CA3027 | 1.0 | 1.2 | 1.1 | IPF20126   | complemer putative chromosome               | orf19.1138I | 20126 IPF11499.f | No significant S.c. match                                                                                       |
| CA3028 | 0.9 | 1.0 | 1.0 | IPF18393   | complemer unknown function                  | orf19.1138I | 18393 IPF20126   | UNCLASSI transporter activity                                                                                   |
| CA3029 | 1.0 | 1.0 | 1.0 | IPF13825   | 10509253..similarity to serine/thre         | orf19.223   | 13825 IPF18393   | UNCLASSIFIED PROTEINS                                                                                           |
| CA3030 | 2.2 | 1.5 | 1.8 | IPF19968   | complemer putative cell wall protei         | orf19.220   | 19968 IPF13825   | CLASSIFIC protein kinase activity                                                                               |
| CA3031 | 1.1 | 0.9 | 1.0 | IPF12324   | 10520768..unknown function                  | orf19.217   | 12324 IPF19968   | CELL RES structural molecule activity                                                                           |
| CA3032 | 1.0 | 1.0 | 0.9 | IPF12319   | complemer unknown function                  | orf19.216   | 12319 IPF12324   | TRANSCR molecular_function unknown                                                                              |
| CA3033 | 1.1 | 1.1 | 1.0 | IPF13202   | 10527690..unknown function                  | orf19.215   | 13202 IPF12319   | CELL RESCUE DEFENSE AND VIRULENCE                                                                               |
| CA3034 | 1.2 | 1.0 | 1.1 | RPN12      | 10529829..26S proteasome reguli             | orf19.213   | 13198 IPF13202   | UNCLASSI molecular_function unknown                                                                             |
| CA3035 | 1.0 | 1.0 | 1.0 | VPS28      | complemer involved in vacuolar tra          | orf19.212   | 13197 CaRPN12    | UNCLASSI peptidase activity                                                                                     |
| CA3036 | 1.0 | 1.0 | 0.9 | IPF13443   | 10531753..unknown function                  | orf19.211   | 13443 CaVPS28    | CELLULAF molecular_function unknown                                                                             |
| CA3037 | 1.0 | 1.0 | 1.0 | IPF13442   | complemer unknown function                  | orf19.210   | 13442 IPF13443   | No significant S.c. match                                                                                       |
| CA3038 | 1.0 | 0.9 | 0.9 | IPF13438   | complemer unknown function                  | orf19.209   | 13438 IPF13442   | UNCLASSI molecular_function unknown                                                                             |
| CA3040 | 1.0 | 1.0 | 1.1 | IPF7306    | complemer putative permease (by             | orf19.2425  | 7306 IPF13438    | CELL FATI molecular_function unknown                                                                            |
| CA3041 | 0.9 | 0.9 | 1.1 | IPF7303    | complemer unknown function                  | orf19.2423  | 7303 IPF7306     | C-compour molecular_function unknown                                                                            |
| CA3042 | 1.1 | 1.1 | 1.0 | ARC1       | 10548031..G4 nucleic acid bindin            | orf19.2422  | 7302 IPF7303     | TRANSCR molecular_function unknown                                                                              |
| CA3043 | 1.0 | 1.1 | 0.9 | DOM34      | 10549385..probable involvement              | orf19.2419  | 7299 CaARC1      | TRANSCR RNA binding                                                                                             |
| CA3044 | 1.0 | 1.0 | 0.9 | IPF7298    | complemer unknown function                  | orf19.2418  | 7298 CaDOM34     | CELL CYC molecular_function unknown                                                                             |
| CA3045 | 1.1 | 1.0 | 1.1 | IPF7297.3  | complemer similar to Saccharomyces cerevisi |             | 7297 IPF7298     | No significant S.c. match                                                                                       |
| CA3046 | 1.1 | 1.0 | 1.0 | IPF7295    | 10552547..unknown function                  | orf19.2417  | 7295 IPF7297.3   | CELL CYC motor activity                                                                                         |
| CA3047 | 1.0 | 1.1 | 1.1 | MSE1       | 10555973..Mitochondrial glutamyl            | orf19.9953  | 7294 IPF7295     | CELL CYC molecular_function unknown                                                                             |
| CA3048 | 1.0 | 1.1 | 1.0 | IPF14991   | 10559150..unknown function                  | orf19.9950  | 14991 CaMSE1     | PROTEIN :ligase activity                                                                                        |
| CA3049 | 1.1 | 1.1 | 1.0 | IPF14990   | complemer unknown function                  | orf19.9949  | 14990 IPF14991   | UNCLASSI molecular_function unknown                                                                             |

|        |     |     |     |            |                                                 |           |            |                 |                                                                                                    |
|--------|-----|-----|-----|------------|-------------------------------------------------|-----------|------------|-----------------|----------------------------------------------------------------------------------------------------|
| CA3050 | 1.0 | 0.9 | 1.0 | IPF13042   | 10561005..similar to Saccharomy orf19.9948      | 13042     | IPF14990   | UNCLASSI        | transporter activity                                                                               |
| CA3051 | 1.0 | 1.0 | 0.9 | IPF13043   | 10563863..unknown function orf19.2408           | 13043     | IPF13042   | PROTEIN I       | molecular_function unknown                                                                         |
| CA3052 | 0.9 | 1.1 | 1.0 | DPS1       | 10564964..aspartyl-tRNA synthetase orf19.9945   | 13045     | IPF13043   | UNCLASSI        | molecular_function unknown                                                                         |
| CA3053 | 0.9 | 0.9 | 1.3 | GTR2       | 10567059..GTP-binding protein (b orf19.9944     | 13046     | CaDPS1     | PROTEIN I       | ligase activity                                                                                    |
| CA3055 | 1.0 | 1.1 | 1.0 | HIR2       | complemer Histone transcription re orf19.1177   | 2951      | CaGTR2     | UNCLASSI        | hydrolase activity                                                                                 |
| CA3056 | 1.0 | 1.0 | 1.0 | IPF2953    | complemer similar to Saccharomy orf19.4294      | 2953      | CaHIR2     | TRANSCR         | transcription regulator activity                                                                   |
| CA3057 | 1.0 | 1.0 | 1.0 | IPF2954    | 10576198..unknown function orf19.4293           | 2954      | IPF2953    | CELLULAF        | molecular_function unknown                                                                         |
| CA3058 | 1.0 | 1.0 | 1.1 | IPF2955    | complemer unknown function orf19.4292           | 2955      | IPF2954    | UNCLASSI        | molecular_function unknown                                                                         |
| CA3059 | 1.0 | 1.0 | 1.0 | TRR1       | complemer Thioredoxin reductase orf19.1176i     | 2959      | IPF2955    | PROTEIN FATE    | [folding modification destination] ""CELLULAR TRANSPORT AND TRANSPORT MECHANISMS SUBCELLULAR LOCAL |
| CA3061 | 0.9 | 1.0 | 0.9 | IPF2965    | complemer unknown function orf19.1176;          | 2965      | CaTRR1     | Nitrogen ar     | transporter activity                                                                               |
| CA3062 | 1.0 | 1.0 | 1.0 | IPF2968    | complemer unknown function orf19.1176;          | 2968      | IPF2965    | C-compound and  | carbohydrate metabolism                                                                            |
| CA3063 | 1.0 | 1.1 | 1.0 | IPF2971    | complemer unknown function orf19.4284           | 2971      | IPF2968    | No significant  | S.c. match                                                                                         |
| CA3064 | 0.9 | 1.1 | 1.0 | IPF2973    | 10589587..unknown function orf19.4283           | 2973      | IPF2971    | CELL CYC        | protein kinase activity,enzyme regulator activity                                                  |
| CA3065 | 0.9 | 1.0 | 0.9 | IPF19775   | 10593296..unknown function orf19.1175i          | 19775     | IPF2973    | PROTEIN FATE    | [folding modification destination] ""SUBCELLULAR LOCALISATION                                      |
| CA3066 | 1.0 | 1.2 | 1.0 | IPF15813   | 10595073..unknown function orf19.4281           | 15813     | IPF19775   | No significant  | S.c. match                                                                                         |
| CA3067 | 1.0 | 1.0 | 0.9 | IPF15811   | complemer unknown function orf19.1175i          | 15811     | IPF15813   | TRANSCR         | molecular_function unknown                                                                         |
| CA3068 | 1.0 | 1.0 | 1.0 | LIP2       | 10604170..Secretory lipase orf19.4804           | 6120      | IPF15811   | No significant  | S.c. match                                                                                         |
| CA3069 | 1.0 | 1.1 | 0.9 | IPF6117    | 10606420..unknown function orf19.4805           | 6117      | CaLIP2     | Other virulence | attributes                                                                                         |
| CA3070 | 1.0 | 0.9 | 0.9 | PPA2       | 10609643..Mitochondrial inorganic orf19.4807    | 6114      | IPF6117    | UNCLASSI        | molecular_function unknown                                                                         |
| CA3071 | 1.0 | 1.0 | 0.9 | NUP188     | complemer Nucleoporin orf19.4808                | 6113      | CaPPA2     | Phosphate       | hydrolase activity                                                                                 |
| CA3072 | 1.0 | 1.0 | 1.1 | ERG12      | 10616174..Mevalonate kinase (by orf19.4809      | 6109      | CaNUP188   | CELLULAF        | structural molecule activity                                                                       |
| CA3073 | 1.0 | 1.0 | 0.9 | IPF6108    | complemer putative tricarboxylate orf19.4811    | 6108      | CaERG12    | Lipid fatty-:z  | transferase activity                                                                               |
| CA3074 | 1.0 | 0.9 | 1.0 | IPF6106    | 10618742..similar to Bacillus halo orf19.4812   | 6106      | IPF6108    | TRANSPO         | molecular_function unknown                                                                         |
| CA3075 | 0.9 | 1.0 | 1.0 | IPF6105    | complemer similar to Saccharomy orf19.4813      | 6105      | IPF6106    | No significant  | S.c. match                                                                                         |
| CA3076 | 1.0 | 1.0 | 1.0 | IPF6101.3  | 10621306..unknown function, 3-pr orf19.4814     | 6101      | IPF6105    | Nucleotide      | ligase activity                                                                                    |
| CA3077 |     |     |     | YTM1       | 10622006..10623406                              | IPF6101.3 |            | No significant  | S.c. match                                                                                         |
| CA3078 | 0.9 | 5.3 | 1.0 | IPF19970   | complemer unknown function orf19.4816           | 19970     |            |                 |                                                                                                    |
| CA3079 | 0.9 | 0.9 | 1.0 | RAM2       | 10625422..geranylgeranyltransfer. orf19.4817    | 15519     | IPF19970   | UNCLASSI        | molecular_function unknown                                                                         |
| CA3080 | 0.9 | 0.9 | 1.0 | IPF14634   | complemer APP-binding protein 1 orf19.4153      | 14634     | CaRAM2     | Lipid fatty-:z  | transferase activity                                                                               |
| CA3081 | 1.2 | 1.6 | 1.0 | EFT3       | 10638188..translation elongation forf19.1162i   | 11638     | IPF14634   | PROTEIN FATE    | [folding modification destination]                                                                 |
| CA3082 | 1.0 | 0.9 | 1.0 | IPF11627   | 10644145..unknown function orf19.1162'          | 11627     | CaEFT3     | PROTEIN I       | translation regulator activity                                                                     |
| CA3083 | 1.0 | 0.9 | 1.0 | IPF11262   | 10644491..unknown function orf19.1162i          | 11626     | IPF11627   | No significant  | S.c. match                                                                                         |
| CA3084 | 1.9 | 3.2 | 1.5 | IPF11625   | 10645394..unknown function orf19.4149           | 11625     | IPF11262   | Nucleotide      | molecular_function unknown                                                                         |
| CA3085 | 1.1 | 1.2 | 1.2 | IPF17086   | 10647065..unknown function orf19.4148           | 17086     | IPF11625   | No significant  | S.c. match                                                                                         |
| CA3086 | 1.1 | 1.1 | 1.1 | GLR1       | 10648979..by similarity to S. cerev orf19.1162' | 14902     | IPF17086   | No significant  | S.c. match                                                                                         |
| CA3087 | 1.0 | 1.1 | 1.1 | SMD3       | complemer core snRNP protein (b: orf19.1162;    | 14903     | CaGLR1     | CELL RES        | transporter activity                                                                               |
| CA3088 | 1.0 | 1.0 | 0.9 | IPF9826    | 10652887..unknown function orf19.1162           | 9826      | CaSMD3     | TRANSCR         | RNA binding                                                                                        |
| CA3089 | 0.8 | 0.9 | 0.8 | IPF9825    | 10656457..unknown function                      | 9825      | IPF9826    | TRANSCR         | transcription regulator activity                                                                   |
| CA3090 | 1.1 | 1.0 | 1.0 | IPF18385   | complemer unknown function orf19.1161i          | 18385     | IPF9825    | UNCLASSI        | molecular_function unknown                                                                         |
| CA3091 | 1.0 | 0.9 | 1.0 | IPF9821.5f | 10659481..unknown function, 5-pr orf19.1161i    | 19600     | IPF18385   | UNCLASSI        | molecular_function unknown                                                                         |
| CA3092 | 0.9 | 1.0 | 1.0 | IPF9821.3f | 10660040..unknown function, 3-pr orf19.1161'    | 9821      | IPF9821.5f | TRANSPORT       | FACILITATION                                                                                       |
| CA3093 | 1.1 | 1.0 | 1.0 | TOF1       | complemer Topoisomerase I interz orf19.1161'    | 9818      | IPF9821.3f | TRANSPO         | transporter activity                                                                               |
| CA3094 | 0.5 | 0.6 | 0.6 | IPF11548   | 10671694..serine/threonine protei orf19.1133i   | 11548     | CaTOF1     | CELL CYC        | molecular_function unknown                                                                         |
| CA3095 | 1.2 | 1.3 | 1.2 | CDC28      | 10674380..CELL DIVISION CONT orf19.3856         | 11549     | IPF11548   | CELL RES        | protein kinase activity                                                                            |
| CA3096 | 1.1 | 1.0 | 1.0 | IPF11551   | 10675988..unknown function orf19.3858           | 11551     | CaCDC28    | CELL CYC        | protein kinase activity                                                                            |
| CA3097 | 1.1 | 1.1 | 1.2 | IPF6600    | 10676828..unknown function orf19.3859           | 6600      | IPF11551   | UNCLASSIFIED    | PROTEINS                                                                                           |
| CA3098 | 1.1 | 2.0 | 1.1 | SIS1       | 10678451..heat shock protein (by orf19.3861     | 6598      | IPF6600    | Lipid fatty-:z  | oxidoreductase activity                                                                            |
| CA3099 | 1.0 | 1.0 | 1.0 | LST8       | 10679824..required for transport corf19.3862    | 6595      | CaSIS1     | CELL CYC        | chaperone activity                                                                                 |
| CA3100 | 1.0 | 0.9 | 0.9 | IPF6594    | complemer unknown function orf19.3863           | 6594      | CaLST8     | CELLULAF        | protein binding                                                                                    |
| CA3101 | 1.0 | 0.9 | 1.0 | IPF6593    | complemer similar to Saccharomy orf19.3865      | 6593      | IPF6594    | TRANSCRIPTION   | SUBCELLULAR LOCALISATION                                                                           |
| CA3102 | 0.9 | 0.9 | 0.9 | RLP7       | 10689617..ribosomal-like proteins orf19.3867    | 6586      | IPF6593    | TRANSCR         | transcription regulator activity                                                                   |
| CA3103 | 1.0 | 0.9 | 0.9 | IPF12086   | 10696183..unknown function orf19.1390i          | 12086     | CaRLP7     | CLASSIFIC       | RNA binding                                                                                        |
| CA3104 | 0.7 | 0.7 | 0.5 | IPF12084   | 10697034..unknown function orf19.1390'          | 12084     | IPF12086   | UNCLASSI        | molecular_function unknown                                                                         |
| CA3105 | 0.5 | 0.4 | 1.1 | IPF12083   | 10698135..unknown function orf19.6553           | 12083     | IPF12084   | UNCLASSI        | molecular_function unknown                                                                         |
| CA3106 | 0.8 | 0.9 | 0.8 | IPF11821   | 10699783..unknown function orf19.6552           | 11821     | IPF12083   | CELLULAR        | TRANSPORT AND TRANSPORT MECHANISMS SUBCELLULAR LOCALISATION                                        |
| CA3107 | 1.0 | 1.0 | 0.9 | GOS1       | complemer SNARE protein of Golz orf19.6551      | 11824     | IPF11821   | SUBCELL         | oxidoreductase activity                                                                            |
| CA3108 | 0.6 | 0.4 | 0.9 | IPF11826   | 10702398..unknown function orf19.6550           | 11826     | CaGOS1     | PROTEIN I       | transporter activity                                                                               |
| CA3109 | 0.9 | 1.0 | 0.6 | IPF11829   | complemer unknown function orf19.6548           | 11829     | IPF11826   | UNCLASSI        | molecular_function unknown                                                                         |
| CA3110 | 1.5 | 1.5 | 1.0 | LPI9       | 10706896..Microtubule-associatec orf19.6544     | 15433     | IPF11829   | Nitrogen ar     | molecular_function unknown                                                                         |
| CA3111 | 1.0 | 1.1 | 1.1 | RPL5       | complemer ribosomal protein (by h orf19.6541    | 10601     | CaLPI9     | CLASSIFIC       | molecular_function unknown                                                                         |
| CA3112 | 0.5 | 1.2 | 0.4 | PFK2       | complemer 6-phosphofructokinase orf19.6540      | 10598     | CaRPL5     | PROTEIN I       | RNA binding                                                                                        |
| CA3113 | 0.9 | 0.9 | 1.0 | IPF15737   | 10717001..similar to Saccharom; orf19.1389;     | 15737     | CaPFK2     | C-compou        | transferase activity                                                                               |
| CA3114 | 1.0 | 1.0 | 1.1 | IPF18384   | 10719606..unknown function                      | 18384     | IPF15737   | CELL CYC        | hydrolase activity                                                                                 |
| CA3115 | 1.6 | 1.2 | 1.9 | ECM33.3    | 10725212..cell wall biogenesis, 3-prime end (   | 5366      | IPF18384   | No significant  | S.c. match                                                                                         |
| CA3116 | 0.8 | 0.7 | 0.9 | LAB2       | complemer LIPOATE BIOSYNTHET orf19.3010         | 5364      | CaECM33.   | CELL CYC        | molecular_function unknown                                                                         |
| CA3117 | 0.9 | 0.9 | 0.9 | IPF5363    | 10727856..unknown function orf19.3009           | 5363      | CaLAB2     | Metabolism      | ligase activity                                                                                    |
| CA3118 | 1.0 | 1.0 | 1.1 | COQ4       | 10730084..ubiquinone biosynthes orf19.3008      | 5361      | IPF5363    | UNCLASSI        | molecular_function unknown                                                                         |
| CA3119 | 1.1 | 0.9 | 1.1 | IPF5360.3  | 10731552..unknown function, 3-prime end         | 5360      | CaCOQ4     | Metabolism      | molecular_function unknown                                                                         |
| CA3120 | 1.0 | 0.9 | 0.9 | IPF5358    | complemer unknown function orf19.3007           | 5358      | IPF5360.3  | UNCLASSIFIED    | PROTEINS                                                                                           |
| CA3121 | 0.9 | 1.0 | 0.9 | GGA1       | 10733426..Arf-binding protein orf19.3006        | 5357      | IPF5358    | UNCLASSI        | molecular_function unknown                                                                         |
| CA3122 | 0.9 | 1.1 | 1.0 | IPF5356    | complemer unknown function orf19.3004           | 5356      | CaGGA1     | CELLULAF        | molecular_function unknown                                                                         |
| CA3123 | 1.0 | 2.0 | 1.1 | RPL6.3     | complemer ribosomal protein, 3-prime end        | 5354      | IPF5356    | UNCLASSI        | molecular_function unknown                                                                         |

|        |     |     |     |            |                                               |                  |                                                                                         |
|--------|-----|-----|-----|------------|-----------------------------------------------|------------------|-----------------------------------------------------------------------------------------|
| CA3124 | 1.0 | 1.1 | 1.1 | IPF5353.3  | complemer unknown function, 3-pr orf19.3003   | 5353 CaRPL6.3    | PROTEIN tRNA binding                                                                    |
| CA3125 | 1.1 | 1.0 | 1.0 | IPF8921.5f | complemer unknown function, 5-prime end       | 8921 IPF5353.3   | UNCLASSI molecular_function unknown                                                     |
| CA3126 | 0.6 | 1.1 | 0.8 | GCN4       | complemer transcriptional activato orf19.1358 | 8919 IPF8921.5e  | No significant S.c. match                                                               |
| CA3127 | 0.8 | 0.9 | 0.8 | IPF8915    | complemer unknown function orf19.1359         | 8915 CaGCN4      | Amino acid DNA binding                                                                  |
| CA3128 | 0.9 | 1.0 | 0.9 | IPF8914    | complemer unknown function orf19.1360         | 8914 IPF8915     | UNCLASSI molecular_function unknown                                                     |
| CA3129 | 1.0 | 0.8 | 0.9 | OST4       | 10756389..oligosaccharyltransferase subunit   | 8912 IPF8914     | CELL CYC molecular_function unknown                                                     |
| CA3130 | 1.0 | 1.0 | 1.0 | TIM23      | 10757192..mitochondrial inner me orf19.1361   | 8911 CaOST4      | No significant S.c. match                                                               |
| CA3131 | 1.1 | 1.0 | 1.0 | IPF8910    | complemer unknown function orf19.1362         | 8910 CaTIM23     | PROTEIN I transporter activity                                                          |
| CA3132 | 0.6 | 0.9 | 0.5 | IPF8904    | 10761903..unknown function orf19.1363         | 8904 IPF8910     | CLASSIFICATION NOT YET CLEAR-CUT                                                        |
| CA3133 | 1.1 | 1.0 | 1.0 | IPF16939   | complemer unknown function orf19.1364         | 16939 IPF8904    | UNCLASSI molecular_function unknown                                                     |
| CA3134 | 0.9 | 0.9 | 0.9 | IPF11499.f | 10765987..unknown function orf19.1365         | 19972 IPF16939   | UNCLASSIFIED PROTEINS                                                                   |
| CA3135 | 1.0 | 0.9 | 1.0 | IPF8990    | 10767918..unknown function orf19.1366         | 8990 IPF11499.r  | No significant S.c. match                                                               |
| CA3136 | 1.0 | 1.0 | 1.0 | IPF8989    | complemer unknown function orf19.1367         | 8989 IPF8990     | No significant S.c. match                                                               |
| CA3137 | 1.1 | 1.1 | 1.0 | IPF8976    | 10779028..unknown function orf19.8949         | 8976 IPF8989     | No signific: molecular_function unknown                                                 |
| CA3138 | 0.9 | 1.0 | 0.9 | SAP2       | 10790905..aspartic protease orf19.3708        | 9220 IPF8976     | No significant S.c. match                                                               |
| CA3139 | 1.1 | 1.1 | 1.1 | YHB3       | 10795143..flavohemoglobin (by h) orf19.3710   | 9216 CaSAP2      | PROTEIN FATE [folding modification destination] ""Other virulence attributes            |
| CA3140 | 1.1 | 1.1 | 1.0 | IPF9214    | 10798230..unknown function orf19.3711         | 9214 CaYHB3      | CELL RESCUE DEFENSE AND VIRULENCE ""SUBCELLULAR LOCALISATION                            |
| CA3141 | 1.0 | 1.1 | 1.0 | IPF9211.3f | complemer unknown function, 3-pr orf19.3712   | 9213 IPF9214     | Metabolism of vitamins cofactors and prosthetic groups                                  |
| CA3142 | 0.9 | 0.9 | 0.7 | IPF9211.5f | complemer unknown function, 3-pr orf19.3713   | 9211 IPF9211.3f  | No significant S.c. match                                                               |
| CA3143 | 1.0 | 1.0 | 1.0 | IPF8295    | 10805134..unknown function orf19.3714         | 8295 IPF9211.5f  | No significant S.c. match                                                               |
| CA3144 | 1.0 | 0.9 | 1.0 | ASF1       | complemer anti-silencing protein (torf19.3715 | 8293 IPF8295     | No significant S.c. match                                                               |
| CA3145 | 1.1 | 1.0 | 1.0 | CDC9       | complemer DNA ligase (by homol) orf19.6155    | 9796 CaASF1      | TRANSCR protein binding                                                                 |
| CA3146 | 1.1 | 0.9 | 1.0 | IPF9797    | complemer unknown function orf19.6156         | 9797 CaCDC9      | CELL CYC ligase activity                                                                |
| CA3147 | 1.2 | 2.2 | 1.0 | IPF9803    | complemer unknown function orf19.6160         | 9803 IPF9797     | No signific: molecular_function unknown                                                 |
| CA3148 | 1.0 | 1.0 | 0.9 | IPF9808    | 10820281..similar to Saccharomy orf19.6163    | 9808 IPF9803     | UNCLASSI molecular_function unknown                                                     |
| CA3149 | 1.0 | 1.1 | 1.0 | KGD1       | 10822581..2-oxoglutarate dehydr orf19.6165    | 19778 IPF9808    | CELL CYC DNA binding                                                                    |
| CA3150 | 1.0 | 1.0 | 1.0 | IPF4035    | complemer unknown function orf19.6166         | 4035 CaKGD1      | C-compour oxidoreductase activity                                                       |
| CA3151 | 1.0 | 1.1 | 1.0 | IPF4033    | complemer similar to Saccharomy orf19.6167    | 4033 IPF4035     | Lipid fatty-acid and isoprenoid metabolism                                              |
| CA3152 | 1.2 | 1.1 | 1.2 | IPF4032    | 10830274..unknown function orf19.6168         | 4032 IPF4033     | C-compour oxidoreductase activity                                                       |
| CA3153 | 0.5 | 0.5 | 0.3 | FRP2       | 10834721..member of the FRP far orf19.6169    | 4028 IPF4032     | CELL CYCLE AND DNA PROCESSING CONTROL OF CELLULAR ORGANIZATION SUBCELLULAR LOCALISATION |
| CA3154 | 0.9 | 1.0 | 1.0 | FUN34.5E   | 10836621..unknown function, 5-prime end       | 18376 CaFRP2     | C-compound and carbohydrate metabolism                                                  |
| CA3156 | 1.0 | 1.0 | 1.0 | IPF14455   | 10837414..similar to Saccharomy orf19.1589    | 14455 CaFUN34.!  | C-compound and carbohydrate metabolism                                                  |
| CA3157 | 1.2 | 1.1 | 1.1 | IPF14456   | complemer unknown function orf19.1588         | 14456 IPF14455   | TRANSCR transcription regulator activity                                                |
| CA3158 | 1.0 | 1.1 | 0.9 | IPF13131.! | 10841576..unknown function, 3-pr orf19.1587   | 13131 IPF14456   | UNCLASSI molecular_function unknown                                                     |
| CA3159 | 1.0 | 0.9 | 1.1 | PLC3       | 10843487..phosphatidylinositol ph orf19.1586  | 13130 IPF13131.! | C-compound and carbohydrate metabolism TRANSPORT FACILITATION                           |
| CA3160 | 1.3 | 1.8 | 1.5 | ZRT2       | complemer zinc transport protein ( orf19.1585 | 13128 CaPLC3     | TRANSCRIPTION SUBCELLULAR LOCALISATION                                                  |
| CA3161 | 1.1 | 1.1 | 1.0 | IPF13121.! | complemer unknown function, 3-pr orf19.1584   | 13121 CaZRT2     | REGULATI transporter activity                                                           |
| CA3162 | 0.9 | 1.0 | 1.0 | HOL5.3F    | complemer member of major facilit orf19.1583  | 13181 IPF13121.! | TRANSPORT FACILITATION                                                                  |
| CA3163 | 0.9 | 0.9 | 1.0 | HOL5.5F    | complemer member of major facilit orf19.1582  | 13183 CaHOL5.3i  | CELL RESCUE DEFENSE AND VIRULENCE ""TRANSPORT FACILITATION                              |
| CA3164 | 0.9 | 0.8 | 1.0 | IPF13187   | 10852889..unknown function orf19.1580         | 13187 CaHOL5.5i  | CELL RESCUE DEFENSE AND VIRULENCE ""TRANSPORT FACILITATION                              |
| CA3165 | 0.9 | 0.9 | 0.9 | FM11       | complemer processing of pre-ribos orf19.1578  | 9638 IPF13187    | No significant S.c. match                                                               |
| CA3166 | 1.0 | 0.9 | 1.0 | IPF9634    | complemer probable GATA zinc fir orf19.1577   | 9634 CaFM11      | TRANSCR RNA binding                                                                     |
| CA3167 | 0.8 | 1.0 | 0.9 | IPF9632    | complemer unknown function orf19.1576         | 9632 IPF9634     | UNCLASSI DNA binding,transcription regulator activity                                   |
| CA3168 | 1.0 | 0.8 | 1.0 | PRS3       | complemer ribose-phosphate pyro orf19.1575    | 9631 IPF9632     | UNCLASSIFIED PROTEINS                                                                   |
| CA3169 | 1.6 | 1.0 | 1.5 | IPF7686    | 10873121..putative mitochondrial orf19.1395   | 7686 CaPRS3      | Amino acid transferase activity                                                         |
| CA3170 | 0.9 | 0.9 | 1.0 | IPF7685    | complemer putative GTPase activ: orf19.1396   | 7685 IPF7686     | Phosphate molecular_function unknown                                                    |
| CA3171 | 0.9 | 0.9 | 1.0 | IPF7681    | 10877654..unknown function orf19.1397         | 7681 IPF7685     | UNCLASSI enzyme regulator activity                                                      |
| CA3172 | 1.0 | 0.9 | 0.9 | IPF7676    | 10879160..unknown function orf19.1400         | 7679 IPF7681     | Lipid fatty-acid and isoprenoid metabolism                                              |
| CA3173 | 1.0 | 0.9 | 1.0 | IPF14145   | complemer unknown function orf19.1401         | 14145 IPF7676    | No significant S.c. match                                                               |
| CA3174 | 1.0 | 1.0 | 1.0 | CCT2       | 10888438..chaperonin of the TCP orf19.1402    | 11584 IPF14145   | No significant S.c. match                                                               |
| CA3175 | 1.1 | 1.0 | 1.1 | IPF11587   | 10890905..unknown function orf19.1403         | 11587 CaCCT2     | UNCLASSI chaperone activity                                                             |
| CA3176 | 1.0 | 1.0 | 0.9 | IPF11588   | complemer unknown function orf19.1404         | 11588 IPF11587   | CELLULAF transporter activity                                                           |
| CA3177 | 1.1 | 1.0 | 1.1 | IPF11589   | complemer similar to Saccharomy orf19.1405    | 11589 IPF11588   | UNCLASSIFIED PROTEINS                                                                   |
| CA3178 | 1.0 | 0.9 | 0.9 | IPF19974   | complemer unknown function orf19.1406         | 19974 IPF11589   | Phosphate metabolism SUBCELLULAR LOCALISATION                                           |
| CA3179 | 1.0 | 1.0 | 1.1 | YLF2       | 10901693..GTP-binding protein orf19.2128      | 12246 IPF19974   | CELL CYCLE AND DNA PROCESSING                                                           |
| CA3180 | 0.9 | 1.0 | 1.1 | IPF12244   | complemer unknown function orf19.2131         | 12244 CaYLF2     | UNCLASSI molecular_function unknown                                                     |
| CA3181 | 0.9 | 0.9 | 1.0 | IPF12241   | complemer unknown function orf19.2132         | 12241 IPF12244   | UNCLASSI ligase activity                                                                |
| CA3182 | 1.0 | 1.0 | 1.0 | LIP4       | 10908164..secretory lipase orf19.2133         | 15657 IPF12241   | UNCLASSIFIED PROTEINS                                                                   |
| CA3183 | 0.9 | 0.9 | 0.9 | TSM1.3F    | complemer component of TFIID cc orf19.2135    | 15656 CaLIP4     | Other virulence attributes                                                              |
| CA3184 | 1.1 | 1.0 | 1.0 | TSM1.5F    | complemer component of TFIID cc orf19.2136    | 13636 CaTSM1.3i  | TRANSCR transcription regulator activity                                                |
| CA3185 | 1.0 | 1.0 | 1.0 | IPF13637   | complemer unknown function orf19.2137         | 13637 CaTSM1.5i  | TRANSCRIPTION SUBCELLULAR LOCALISATION                                                  |
| CA3186 | 1.2 | 0.9 | 1.0 | ILS1       | 10915617..isoleucyl-tRNA synthet orf19.2138   | 13644 IPF13637   | No significant S.c. match                                                               |
| CA3187 | 1.0 | 1.0 | 1.0 | IPF17094   | complemer unknown function orf19.2143         | 17094 CaILS1     | PROTEIN t ligase activity                                                               |
| CA3188 | 1.0 | 1.0 | 1.0 | IPF11610   | complemer similar to Saccharomy orf19.2146    | 11610 IPF17094   | UNCLASSI molecular_function unknown                                                     |
| CA3189 | 0.9 | 0.8 | 0.8 | IPF11607   | complemer unknown function orf19.2149         | 11607 IPF11610   | TRANSCR transferase activity                                                            |
| CA3190 | 1.0 | 1.0 | 0.9 | IPF11603   | 10926058..unknown function orf19.2150         | 11603 IPF11607   | REGULATI molecular_function unknown                                                     |
| CA3191 | 1.0 | 1.3 | 1.0 | IPF11601   | 10927146..unknown function orf19.2151         | 11601 IPF11603   | ENERGY t transporter activity                                                           |
| CA3192 | 1.0 | 1.0 | 1.0 | IPF11598   | 10929664..by homology to S. cerv orf19.2154   | 11598 IPF11601   | CLASSIFIC molecular_function unknown                                                    |
| CA3193 | 1.1 | 0.9 | 1.1 | IPF3418    | complemer unknown function orf19.6170         | 3418 IPF11598    | C-compound and carbohydrate metabolism ENERGY SUBCELLULAR LOCALISATION                  |
| CA3194 | 1.1 | 1.2 | 1.1 | IPF3425    | complemer unknown function orf19.6171         | 3423 IPF3418     | CELL CYC protein binding                                                                |
| CA3195 | 1.0 | 1.0 | 1.1 | IPF3426    | 10936551..unknown function orf19.6173         | 3426 IPF3425     | CELLULAF structural molecule activity                                                   |
| CA3196 | 1.1 | 1.0 | 1.0 | IPF3428    | complemer unknown function orf19.6175         | 3428 IPF3426     | C-compour enzyme regulator activity                                                     |

|        |     |     |     |            |                                                |             |       |            |                                                                                                |                                                         |                                                                      |
|--------|-----|-----|-----|------------|------------------------------------------------|-------------|-------|------------|------------------------------------------------------------------------------------------------|---------------------------------------------------------|----------------------------------------------------------------------|
| CA3197 | 1.1 | 1.1 | 1.1 | SEC61      | complemer ER protein-translocator              | orf19.6176  | 3431  | IPF3428    | UNCLASSI                                                                                       | molecular_function                                      | unknown                                                              |
| CA3198 | 1.0 | 1.1 | 0.9 | IPF3432    | 10939919..Unknown function                     | orf19.6177  | 3432  | CaSEC61    | PROTEIN I                                                                                      | transporter                                             | activity                                                             |
| CA3199 | 1.1 | 1.0 | 0.9 | FBP1       | 10940393..Fructose-1,6-bisphosp                | orf19.6178  | 3435  | IPF3432    | No significant                                                                                 | S.c.                                                    | match                                                                |
| CA3200 | 1.0 | 1.0 | 1.0 | IPF3439    | 10941463..unknown function                     | orf19.6180  | 3439  | CaFBP1     | C-compour                                                                                      | hydrolase                                               | activity                                                             |
| CA3201 | 1.0 | 1.0 | 1.1 | IPF3444.3f | complemer unknown function, 3-pr               | orf19.6182  | 3443  | IPF3439    | UNCLASSI                                                                                       | transporter                                             | activity                                                             |
| CA3202 | 1.0 | 0.9 | 1.0 | IPF3444.5f | complemer unknown function, 5-pr               | orf19.6184  | 3444  | IPF3444.3f | Lipid fatty-acid and isoprenoid                                                                | metabolism                                              | ""TRANSCRIPTION SUBCELLULAR LOCALISATION                             |
| CA3203 | 0.9 | 0.7 | 1.1 | IPF3445    | 10945425..Unknown function                     | orf19.6183  | 3445  | IPF3444.5f | No significant                                                                                 | S.c.                                                    | match                                                                |
| CA3204 | 1.0 | 1.0 | 1.0 | IPF3446    | complemer Unknown function                     | orf19.6186  | 3446  | IPF3445    | PROTEIN I                                                                                      | transporter                                             | activity                                                             |
| CA3205 | 1.1 | 1.0 | 1.0 | IPF3448    | 10946634..Unknown function                     | orf19.6185  | 3448  | IPF3446    | UNCLASSIFIED                                                                                   | PROTEINS                                                |                                                                      |
| CA3206 | 1.0 | 0.9 | 1.0 | IPF3454    | 10947640..unknown function                     | orf19.6187  | 3454  | IPF3448    | No significant                                                                                 | S.c.                                                    | match                                                                |
| CA3207 | 0.9 | 0.9 | 1.0 | IPF3456    | 10948707..unknown function                     | orf19.6189  | 3456  | IPF3454    | No significant                                                                                 | S.c.                                                    | match                                                                |
| CA3208 | 1.3 | 1.6 | 1.4 | PSA1       | complemer GDP-mannose pyroph                   | orf19.6190  | 3458  | IPF3456    | UNCLASSI                                                                                       | molecular_function                                      | unknown                                                              |
| CA3209 | 1.3 | 1.8 | 0.9 | CTA2.5.3F  | complemer transcriptional activator, 3-prime e |             | 3460  | CaPSA1     | C-compour                                                                                      | nucleotidyltransferase                                  | activity                                                             |
| CA3211 | 1.0 | 1.0 | 1.0 | IPF19977   | complemer unknown function                     | orf19.6192  | 19977 | CaCTA2.5   | No significant                                                                                 | S.c.                                                    | match                                                                |
| CA3212 | 0.9 | 0.9 | 0.9 | MEF2       | 10966922.. translation elongation f            | orf19.6208  | 8163  | IPF19977   | Lipid fatty-acid and isoprenoid                                                                | metabolism                                              | ""SUBCELLULAR LOCALISATION                                           |
| CA3213 | 1.0 | 1.0 | 0.9 | IPF8160    | 10969537..unknown function                     | orf19.6205  | 8160  | CaMEF2     | PROTEIN I                                                                                      | translation regulator                                   | activity                                                             |
| CA3214 | 0.9 | 1.0 | 0.9 | PUT3       | complemer putative positive activa             | orf19.6203  | 8158  | IPF8160    | UNCLASSI                                                                                       | molecular_function                                      | unknown                                                              |
| CA3215 | 1.0 | 1.0 | 0.8 | HCS1       | complemer putative DNA helicase                | orf19.6199  | 13040 | CaPUT3     | Amino acid transcription                                                                       | regulator                                               | activity                                                             |
| CA3216 | 1.0 | 1.0 | 1.2 | IPF13038   | complemer unknown function                     |             | 13038 | CaHCS1     | CELL CYC                                                                                       | DNA binding,helicase                                    | activity                                                             |
| CA3217 | 1.1 | 1.0 | 0.9 | DHH1       | complemer RNA helicase by homc                 | orf19.6197  | 19979 | IPF13038   | No signific                                                                                    | molecular_function                                      | unknown                                                              |
| CA3218 | 1.0 | 1.1 | 1.0 | IPF10005   | 10989742..unknown function                     | orf19.6196  | 10005 | CaDHH1     | TRANSCR                                                                                        | protein binding                                         |                                                                      |
| CA3219 | 1.0 | 1.0 | 1.0 | IPF10003   | complemer similar to Saccharomy                | orf19.6195  | 10003 | IPF10005   | No significant                                                                                 | S.c.                                                    | match                                                                |
| CA3220 | 0.9 | 0.9 | 0.9 | IPF10001   | complemer unknown function                     | orf19.6194  | 10001 | IPF10003   | Nucleotide RNA binding,hydrolase                                                               | activity                                                |                                                                      |
| CA3221 | 1.0 | 1.0 | 1.0 | IPF10000.1 | 10994663..unknown function, 5-pr               | orf19.6193  | 10000 | IPF10001   | No significant                                                                                 | S.c.                                                    | match                                                                |
| CA3222 | 1.0 | 0.9 | 1.1 | IPF15883   | complemer unknown function                     | orf19.6283  | 17135 | IPF10000.1 | CELL CYC                                                                                       | protein kinase                                          | activity                                                             |
| CA3223 | 1.0 | 1.1 | 1.0 | SRP102     | 10999078..Signal recognition part              | orf19.6284  | 17133 | IPF15883   | Nitrogen and sulphur metabolism                                                                | REGULATION OF/INTERACTION WITH CELLULAR ENVIRONMENT     |                                                                      |
| CA3224 | 1.3 | 1.0 | 1.1 | GLC7       | complemer Ser/thr phosphoprotein               | orf19.6285  | 18366 | CaSRP102   | PROTEIN FATE [folding modification destination]                                                | ""SUBCELLULAR LOCALISATION                              |                                                                      |
| CA3225 | 1.1 | 1.1 | 1.0 | IPF9329    | 11003785..unknown function                     | orf19.6286  | 9329  | CaGLC7     | C-compour                                                                                      | protein phosphatase                                     | activity                                                             |
| CA3226 | 0.9 | 1.0 | 1.2 | RPS27      | 11005478..ribosomal protein S27 (by homolog    |             | 9327  | IPF9329    | UNCLASSI                                                                                       | molecular_function                                      | unknown                                                              |
| CA3227 | 0.8 | 0.7 | 0.8 | AAT21      | complemer aspartate aminotransfer              | orf19.6287  | 9326  | CaRPS27    | PROTEIN I                                                                                      | structural molecule                                     | activity                                                             |
| CA3228 | 1.0 | 1.1 | 1.1 | IPF9325    | 11007926..unknown function                     | orf19.6288  | 9325  | CaAAT21    | Amino acid transferase                                                                         | activity                                                |                                                                      |
| CA3229 | 1.0 | 1.0 | 0.9 | FUN30      | complemer helicases of the Snf2/Forf           | orf19.6291  | 9324  | IPF9325    | No significant                                                                                 | S.c.                                                    | match                                                                |
| CA3230 | 1.0 | 1.0 | 0.9 | EMP24      | complemer component of the COP                 | orf19.6293  | 9318  | CaFUN30    | CELL CYC                                                                                       | molecular_function                                      | unknown                                                              |
| CA3231 | 0.9 | 1.0 | 0.9 | IPF14348.1 | complemer unknown function, 3-prime end        |             | 14348 | CaEMP24    | CELLULAF                                                                                       | molecular_function                                      | unknown                                                              |
| CA3232 | 1.0 | 1.0 | 0.9 | IPF17727.1 | 11016729..unknown function, 3-prime end        |             | 14351 | IPF14348.1 | No significant                                                                                 | S.c.                                                    | match                                                                |
| CA3233 | 0.9 | 0.9 | 1.1 | MYO1       | 11018670..myosin-1 isoform (type               | orf19.6294  | 10851 | IPF17727.1 | No significant                                                                                 | S.c.                                                    | match                                                                |
| CA3234 | 1.0 | 1.0 | 1.0 | MAS2       | complemer processing peptidase,                | orf19.6295  | 10850 | CaMYO1     | CELL CYC                                                                                       | motor                                                   | activity                                                             |
| CA3235 | 1.0 | 1.1 | 1.0 | SNF8       | 11027752..involved in glucose der              | orf19.6296  | 15696 | CaMAS2     | PROTEIN I                                                                                      | peptidase                                               | activity                                                             |
| CA3236 | 1.0 | 1.1 | 1.1 | DEG1       | complemer pseudouridine synthas                | orf19.6297  | 15695 | CaSNF8     | C-compour                                                                                      | molecular_function                                      | unknown                                                              |
| CA3237 | 1.0 | 1.0 | 1.0 | SPB4       | 11030097..ATP-dependent RNA t                  | orf19.6298  | 15694 | CaDEG1     | TRANSCR                                                                                        | lyase                                                   | activity                                                             |
| CA3239 | 1.1 | 1.0 | 1.5 | IPF10558   | complemer unknown function                     |             | 10558 | CaSPB4     | TRANSCR                                                                                        | RNA binding,helicase                                    | activity                                                             |
| CA3240 | 1.1 | 1.0 | 0.9 | IPF10559   | 11038512..myosin-like protein (by              | orf19.4683  | 10559 | IPF10558   | PROTEIN SYNTHESIS ""PROTEIN FATE [folding modification destination] ""SUBCELLULAR LOCALISATION |                                                         |                                                                      |
| CA3241 | 0.9 | 1.0 | 1.0 | IPF7493    | 11046547..putative permease (by                | orf19.4682  | 7493  | IPF10559   | CELL CYC                                                                                       | molecular_function                                      | unknown                                                              |
| CA3242 | 1.0 | 1.0 | 1.0 | RAT1       | 11048860..5 -3 Exoribonuclease                 | orf19.4681  | 7491  | IPF7493    | C-compound and carbohydrate                                                                    | metabolism                                              | CELLULAR TRANSPORT AND TRANSPORT MECHANISMS SUBCELLULAR LOCALISATION |
| CA3243 | 1.0 | 1.1 | 1.0 | IPF7489    | complemer unknown function                     | orf19.4680  | 7489  | CaRAT1     | TRANSCR                                                                                        | RNA binding                                             |                                                                      |
| CA3244 | 1.0 | 0.9 | 1.0 | AGP2       | complemer amino-acid permease                  | orf19.4679  | 7487  | IPF7489    | No significant                                                                                 | S.c.                                                    | match                                                                |
| CA3245 | 1.0 | 0.8 | 1.0 | IPF19980   | complemer putative lipase (by hor              | orf19.4678  | 19980 | CaAGP2     | Amino acid transporter                                                                         | activity                                                |                                                                      |
| CA3246 | 0.9 | 0.9 | 0.8 | IPF15830   | complemer unknown function                     | orf19.4677  | 15830 | IPF19980   | Lipid fatty-: hydrolase                                                                        | activity                                                |                                                                      |
| CA3247 | 0.9 | 0.9 | 1.0 | IPF15832   | complemer unknown function                     | orf19.4676  | 15832 | IPF15830   | UNCLASSI                                                                                       | molecular_function                                      | unknown                                                              |
| CA3248 | 1.0 | 0.9 | 1.0 | IPF15834   | 11060569..unknown function                     | orf19.4675  | 15834 | IPF15832   | UNCLASSI                                                                                       | molecular_function                                      | unknown                                                              |
| CA3249 | 0.9 | 0.9 | 0.9 | GEF2       | 11068295..Putative voltage-gated               | orf19.11211 | 9175  | IPF15834   | No significant                                                                                 | S.c.                                                    | match                                                                |
| CA3250 | 1.0 | 0.9 | 1.0 | IPF4716    | complemer unknown Function                     | orf19.11221 | 4716  | CaGEF2     | CELLULAR TRANSPORT AND TRANSPORT MECHANISMS                                                    | REGULATION OF/INTERACTION WITH CELLULAR ENVIRONMENT SUB |                                                                      |
| CA3251 | 1.0 | 1.1 | 1.0 | IPF4721    | 11076782..unknown Function                     | orf19.3737  | 4721  | IPF4716    | Nucleotide metabolism                                                                          | CELL CYCLE AND DNA PROCESSING                           | CELLULAR COMMUNICATION/SIGNAL TRANSDUCTION MECHANISM                 |
| CA3252 | 1.0 | 1.1 | 0.9 | IPF4722    | complemer unknown Function                     | orf19.3738  | 4722  | IPF4721    | UNCLASSIFIED                                                                                   | PROTEINS                                                |                                                                      |
| CA3253 | 1.1 | 1.1 | 1.1 | IPF4724    | complemer unknown Function                     | orf19.11221 | 4724  | IPF4722    | No significant                                                                                 | S.c.                                                    | match                                                                |
| CA3254 | 1.0 | 1.0 | 1.0 | IPF4728    | 11082297..unknown Function                     | orf19.11221 | 4728  | IPF4724    | No significant                                                                                 | S.c.                                                    | match                                                                |
| CA3255 | 1.1 | 1.0 | 1.1 | IPF4729    | 11083186..unknown Function                     | orf19.3743  | 4729  | IPF4728    | CELL CYCLE AND DNA PROCESSING                                                                  | SUBCELLULAR LOCALISATION                                |                                                                      |
| CA3256 | 1.0 | 1.0 | 1.0 | IPF4730    | 11084640..unknown Function                     | orf19.11221 | 4730  | IPF4729    | No significant                                                                                 | S.c.                                                    | match                                                                |
| CA3257 | 0.9 | 1.0 | 0.9 | IFC1       | 11089056..Unknown Function                     | orf19.3746  | 4732  | IPF4730    | UNCLASSI                                                                                       | molecular_function                                      | unknown                                                              |
| CA3258 | 1.0 | 1.0 | 0.9 | IFC2       | 11095342..Unknown Function                     | orf19.11231 | 4737  | CaIFC1     | TRANSPORT                                                                                      | FACILITATION                                            |                                                                      |
| CA3259 | 0.9 | 1.0 | 1.1 | IPF7970    | 11100373..unknown function                     | orf19.10201 | 7970  | CaIFC2     | TRANSPORT                                                                                      | FACILITATION                                            |                                                                      |
| CA3260 | 0.9 | 1.0 | 1.0 | IPF7968    | 11101858..unknown function                     | orf19.2693  | 7968  | IPF7970    | No significant                                                                                 | S.c.                                                    | match                                                                |
| CA3261 | 1.0 | 1.1 | 0.9 | TYS1       | complemer tyrosyl-tRNA synthetas               | orf19.2694  | 5023  | IPF7968    | Nitrogen and sulphur                                                                           | metabolism                                              |                                                                      |
| CA3262 | 1.0 | 0.8 | 1.0 | UBR11.3    | 11104759..ubiquitin-protein ligase             | orf19.2695  | 5026  | CaTYS1     | PROTEIN I                                                                                      | ligase                                                  | activity                                                             |
| CA3263 | 1.1 | 1.0 | 1.0 | UBR12      | complemer ubiquitin-protein ligase             | orf19.2697  | 19781 | CaUBR11.3  | PROTEIN I                                                                                      | ligase                                                  | activity                                                             |
| CA3264 | 0.9 | 0.9 | 1.0 | IPF5035    | 11116385..unknown function                     | orf19.2698  | 5035  | CaUBR12    | UNCLASSI                                                                                       | ligase                                                  | activity                                                             |
| CA3265 | 1.1 | 1.6 | 1.1 | ABP1       | complemer actin-binding protein (b             | orf19.2699  | 5041  | IPF5035    | UNCLASSI                                                                                       | molecular_function                                      | unknown                                                              |
| CA3266 | 1.2 | 1.0 | 1.0 | IPF5045    | complemer unknown function                     | orf19.2703  | 5045  | CaABP1     | CELL FATI                                                                                      | protein binding                                         |                                                                      |
| CA3267 | 1.1 | 1.5 | 1.0 | RPS620A    | complemer unknown function                     | orf19.6300  | 20129 | IPF5045    | UNCLASSI                                                                                       | molecular_function                                      | unknown                                                              |
| CA3268 | 1.1 | 0.9 | 1.1 | RPS620B    | complemer unknown function                     | orf19.6301  | 19981 | RPS620a    | No significant                                                                                 | S.c.                                                    | match                                                                |
| CA3269 | 1.0 | 0.9 | 1.1 | IPF12221   | 11134151..unknown function                     | orf19.6302  | 12221 | RPS620b    | No significant                                                                                 | S.c.                                                    | match                                                                |
| CA3270 | 1.1 | 0.9 | 1.1 | LYSS       | complemer L-aminoadipate-semial                | orf19.6304  | 12222 | IPF12221   | No significant                                                                                 | S.c.                                                    | match                                                                |

|        |     |     |     |            |                                                 |                  |                                                                                                         |
|--------|-----|-----|-----|------------|-------------------------------------------------|------------------|---------------------------------------------------------------------------------------------------------|
| CA3271 | 1.0 | 1.1 | 1.1 | GLY2       | complemer L-threonine aldolase, l orf19.6305    | 12223 CaLYS5     | Amino acid transferase activity                                                                         |
| CA3272 | 1.0 | 0.9 | 1.0 | ALD4       | 11138987..aldehyde dehydrogenase orf19.6306     | 12224 CaGLY2     | Amino acid lyase activity                                                                               |
| CA3273 | 1.0 | 1.0 | 1.0 | IPF12227.E | 11141508..unknown function, 5-pr orf19.6307     | 19982 CaALD4     | CLASSIFICATION NOT YET CLEAR-CUT                                                                        |
| CA3274 | 1.0 | 1.0 | 1.1 | IPF12227.C | 11142865..unknown function, 3-pr orf19.6308     | 12227 IPF12227.E | TRANSCRIPTION SUBCELLULAR LOCALISATION                                                                  |
| CA3275 | 1.0 | 1.0 | 1.1 | IPF17068   | 11144794..unknown function orf19.6309           | 17068 IPF12227.C | No significant S.c. match                                                                               |
| CA3276 | 1.0 | 1.0 | 1.1 | IPF6263    | 11148141..unknown function orf19.6310           | 6263 IPF17068    | No significant S.c. match                                                                               |
| CA3277 | 0.7 | 0.5 | 0.6 | IPF6266    | complemer unknown function orf19.6311           | 6266 IPF6263     | No significant S.c. match                                                                               |
| CA3278 | 1.1 | 1.4 | 1.2 | RPS3       | complemer Ribosomal protein S3, orf19.6312      | 6267 IPF6266     | No significant S.c. match                                                                               |
| CA3279 | 1.1 | 1.0 | 1.0 | IPF6268    | complemer unknown function orf19.6313           | 6268 CaRPS3      | PROTEIN :structural molecule activity                                                                   |
| CA3280 | 0.9 | 0.9 | 0.8 | IPF6269.3  | complemer unknown function, 3-prime end         | 6269 IPF6268     | C-compound and carbohydrate metabolism ""PROTEIN FATE [folding modification destination] ""             |
| CA3281 | 1.0 | 1.0 | 0.9 | RPB8       | complemer DNA-directed RNA pol orf19.6314       | 6271 IPF6269.3   | No significant S.c. match                                                                               |
| CA3282 | 1.2 | 1.1 | 1.2 | IPF6272    | 11159454..unknown function orf19.6315           | 6272 CaRPB8      | TRANSCR nucleotidyltransferase activity                                                                 |
| CA3283 | 1.1 | 0.9 | 1.1 | IPF6274    | 11160497..unknown function orf19.6316           | 6274 IPF6272     | No significant S.c. match                                                                               |
| CA3284 | 1.0 | 1.1 | 1.1 | ADE6       | 11163386..5-phosphoribosylform orf19.6317       | 6279 IPF6274     | UNCLASSImolecular_function unknown                                                                      |
| CA3285 | 1.0 | 1.0 | 1.1 | IPF6280    | complemer unknown function orf19.6318           | 6280 CaADE6      | Nucleotide ligase activity                                                                              |
| CA3286 | 0.9 | 1.0 | 1.0 | UBP3.3EO   | 11169385..Ubiquitin-specific prote orf19.6319   | 14298 IPF6280    | UNCLASSImolecular_function unknown                                                                      |
| CA3287 | 1.0 | 1.0 | 1.0 | IPF14295   | complemer putative Sed1p-like cel orf19.6321    | 14295 CaUBP3.3   | TRANSCR peptidase activity                                                                              |
| CA3288 | 1.1 | 1.3 | 0.9 | ARD8       | complemer D-arabinitol dehydroge orf19.6322     | 14294 IPF14295   | No significant S.c. match                                                                               |
| CA3289 | 0.9 | 0.9 | 1.0 | HPA3       | 11173021..histone and other prote orf19.6323    | 14291 CaARD8     | ENERGY SUBCELLULAR LOCALISATION                                                                         |
| CA3290 | 1.1 | 1.0 | 1.1 | IPF5734    | 11173579..unknown function orf19.6324           | 5734 CaHPA3      | CELL CYC transferase activity                                                                           |
| CA3291 | 1.0 | 0.9 | 0.9 | IPF5730    | complemer unknown function                      | 5730 IPF5734     | UNCLASSImolecular_function unknown                                                                      |
| CA3292 | 1.0 | 0.9 | 1.0 | IPF5729    | 11176175..unknown function orf19.6326           | 5729 IPF5730     | UNCLASSImolecular_function unknown                                                                      |
| CA3293 | 1.1 | 1.1 | 1.0 | IPF5726    | 11177065..unknown function orf19.6327           | 5726 IPF5729     | No significant S.c. match                                                                               |
| CA3294 | 1.0 | 0.9 | 1.0 | IPF5725    | complemer unknown function orf19.6328           | 5725 IPF5726     | No significant S.c. match                                                                               |
| CA3295 | 1.0 | 1.0 | 1.1 | IPF5723.E  | 11178263..cell surface GPI-ancho orf19.6329     | 5723 IPF5725     | UNCLASSImolecular_function unknown                                                                      |
| CA3296 | 1.0 | 1.0 | 1.0 | IPF5723.E  | 11179639..cell surface GPI-ancho orf19.6336     | 5720 IPF5723.e   | No significant S.c. match                                                                               |
| CA3299 | 1.0 | 1.0 | 1.1 | IPF13777   | complemer unknown function orf19.2317           | 13777 IPF5723.e  | No significant S.c. match                                                                               |
| CA3300 | 1.0 | 0.9 | 1.0 | RTG3       | complemer Probable bHLH/zip tra orf19.2315      | 13780 IPF13777   | No significant S.c. match                                                                               |
| CA3301 | 0.9 | 0.9 | 0.9 | IPF13782   | complemer unknown function orf19.2314           | 13782 CaRTG3     | C-compou transcription regulator activity                                                               |
| CA3302 | 0.9 | 1.0 | 1.0 | IPF13784   | complemer unknown function orf19.2313           | 13784 IPF13782   | CONTROL molecular_function unknown                                                                      |
| CA3303 | 1.0 | 1.2 | 1.0 | FRE42      | 11198079..ferric reductase (by ho orf19.2312    | 15397 IPF13784   | UNCLASSIFIED PROTEINS                                                                                   |
| CA3304 | 1.6 | 1.2 | 1.4 | RPL82      | 11200750..60S ribosomal protein orf19.2311      | 11736 CaFRE42    | REGULATION OF/INTERACTION WITH CELLULAR ENVIRONMENT Other virulence attributes                          |
| CA3305 | 0.9 | 1.2 | 1.3 | RPL29      | 11202094..ribosomal protein, cytosolic(by hor   | 11737 CaRPL82    | PROTEIN SYNTHESIS SUBCELLULAR LOCALISATION                                                              |
| CA3306 | 0.9 | 1.0 | 1.0 | IPF11738   | 11202754..unknown function orf19.2310           | 11738 CaRPL29    | No signific structural molecule activity                                                                |
| CA3307 | 0.9 | 1.1 | 1.6 | RPL2.3     | complemer ribosomal protein L8, 3-prime end     | 11739 IPF11738   | PROTEIN :molecular_function unknown                                                                     |
| CA3308 | 0.8 | 0.8 | 0.9 | PET127     | 11206167..component of mitochor orf19.9845      | 11742 CaRPL2.3   | PROTEIN :structural molecule activity                                                                   |
| CA3309 | 1.0 | 1.1 | 1.0 | IPF8806    | 11210004..6-phosphofructose-2-k orf19.9844      | 8806 CaPET127    | PROTEIN :molecular_function unknown                                                                     |
| CA3310 | 1.0 | 0.9 | 1.0 | PFS2       | complemer Polyadenylation Factor orf19.2307     | 8808 IPF8806     | C-compound and carbohydrate metabolism SUBCELLULAR LOCALISATION                                         |
| CA3311 | 1.0 | 1.0 | 1.0 | IPF8809    | 11213581..unknown function orf19.2306           | 8809 CaPFS2      | TRANSCR RNA binding                                                                                     |
| CA3312 | 1.1 | 0.9 | 1.0 | IPF8810    | complemer unknown function orf19.2305           | 8810 IPF8809     | UNCLASSImolecular_function unknown                                                                      |
| CA3313 | 1.1 | 1.1 | 1.1 | IPF8811    | complemer unknown function orf19.2304           | 8811 IPF8810     | PROTEIN :protein binding                                                                                |
| CA3314 | 1.0 | 0.8 | 0.9 | IPF8812    | 11216686..unknown function orf19.2303           | 8812 IPF8811     | UNCLASSIFIED PROTEINS                                                                                   |
| CA3315 | 0.9 | 0.9 | 1.0 | IPF8814    | 11217693..unknown function orf19.2302           | 8814 IPF8812     | TRANSCR RNA binding                                                                                     |
| CA3316 | 1.1 | 1.1 | 1.0 | IPF8817    | 11219488..putative proteasome st orf19.2301     | 8817 IPF8814     | No significant S.c. match                                                                               |
| CA3317 | 1.1 | 1.0 | 1.1 | URM1       | complemer ubiquitin like protein (b orf19.2299  | 8818 IPF8817     | UNCLASSImolecular_function unknown                                                                      |
| CA3318 | 1.1 | 1.1 | 1.1 | WBP1       | 11221040..Oligosaccharyl transfe orf19.2298     | 8820 CaURM1      | PROTEIN FATE [folding modification destination]                                                         |
| CA3319 | 1.0 | 1.0 | 1.0 | DRS25.3E   | 11223914..Probable ATPase, 3-pr orf19.2680      | 6900 CaWBP1      | C-compou transferase activity                                                                           |
| CA3320 | 0.9 | 1.0 | 1.0 | IPF6898    | complemer similar to Saccharomy orf19.2678      | 6898 CaDRS25.    | TRANSPO transporter activity                                                                            |
| CA3321 | 1.0 | 1.1 | 1.0 | IPF6896.5f | 11231331..unknown function, 5-pr orf19.2677     | 6896 IPF6898     | CELL CYC protein binding.protein kinase activity                                                        |
| CA3322 | 1.0 | 1.0 | 1.0 | IPF6895.3f | 11232939..unknown function, 3-prime end         | 6895 IPF6896.5f  | ENERGY hydrolase activity                                                                               |
| CA3323 | 0.8 | 0.9 | 0.9 | IKI1       | complemer killer toxin insensitive f orf19.2676 | 6894 IPF6895.3f  | ENERGY                                                                                                  |
| CA3324 | 1.0 | 0.9 | 1.1 | IPF6893    | 11234357..unknown function orf19.2675           | 6893 CaIKI1      | CLASSIFIC transcription regulator activity                                                              |
| CA3325 | 0.9 | 1.0 | 1.1 | IPF6890    | complemer unknown function orf19.2674           | 6890 IPF6893     | TRANSCR RNA binding                                                                                     |
| CA3326 | 0.9 | 1.0 | 1.0 | IPF6889    | 11239385..unknown function orf19.2673           | 6889 IPF6890     | No significant S.c. match                                                                               |
| CA3327 | 0.9 | 0.9 | 1.2 | NCP1       | 11242005..NADPH-cytochrome P. orf19.2672        | 10561 IPF6889    | UNCLASSImolecular_function unknown                                                                      |
| CA3328 | 1.0 | 1.1 | 1.0 | IPF10564   | 11245061..unknown function orf19.2671           | 10564 CaNCP1     | Lipid fatty- transporter activity                                                                       |
| CA3329 | 0.9 | 0.9 | 1.0 | IPF12162   | complemer Unknown function orf19.2670           | 12162 IPF10564   | UNCLASSIFIED PROTEINS                                                                                   |
| CA3330 | 1.0 | 0.9 | 1.0 | POL21.3    | complemer pol polyprotein, revers orf19.2669    | 12161 IPF12162   | UNCLASSImolecular_function unknown                                                                      |
| CA3331 | 0.9 | 1.0 | 1.0 | POL.3      | complemer Pol part of pCal retrotransposon      | 12159 CaPOL21.   | No significant S.c. match                                                                               |
| CA3332 | 1.0 | 1.0 | 1.0 | GAG        | complemer GAG protein of pCal re orf19.2668     | 12158 CaPOL.3    | No significant S.c. match                                                                               |
| CA3333 | 1.0 | 1.3 | 0.9 | CDC48      | 11256925..microsomal ATPase (b orf19.9876       | 8680 CaGAG       | No significant S.c. match                                                                               |
| CA3334 | 1.3 | 1.1 | 1.5 | ALP1       | complemer amino-acid permease i orf19.2337      | 8681 CaCDC48     | CELL CYC hydrolase activity                                                                             |
| CA3335 | 1.0 | 0.9 | 1.0 | IPF8682    | 11262451..unknown function orf19.2336           | 8682 CaALP1      | Amino acid metabolism CELLULAR TRANSPORT AND TRANSPORT MECHANISMS SUBCELLULAR LOCALISATION TRANSPORT FA |
| CA3336 | 0.8 | 0.7 | 0.9 | IPF19983   | complemer unknown function orf19.2335           | 19983 IPF8682    | CELL FATE                                                                                               |
| CA3337 | 0.9 | 0.9 | 0.9 | IPF13583   | 11264759..unknown function orf19.2334           | 13583 IPF19983   | PROTEIN :molecular_function unknown                                                                     |
| CA3338 | 1.3 | 1.2 | 1.1 | IPF13582   | complemer unknown function orf19.2333           | 13582 IPF13583   | C-compou molecular_function unknown                                                                     |
| CA3339 | 0.9 | 1.0 | 1.0 | IPF20131   | 11269757..unknown function orf19.2332           | 20131 IPF13582   | UNCLASSImolecular_function unknown                                                                      |
| CA3340 | 1.0 | 0.9 | 0.9 | ADA2       | complemer general transcriptional orf19.2331    | 15288 IPF20131   | CONTROL molecular_function unknown                                                                      |
| CA3341 | 1.1 | 1.4 | 1.1 | RPS17.3    | 11273133..Ribosomal protein S17, 3-prime er     | 15290 CaADA2     | TRANSCR transcription regulator activity                                                                |
| CA3342 | 1.0 | 1.0 | 1.0 | IPF13361   | 11274016..unknown function orf19.2330           | 13361 CaRPS17.   | PROTEIN :structural molecule activity                                                                   |
| CA3343 | 1.0 | 1.1 | 1.0 | IPF13360   | complemer unknown function orf19.2328           | 13360 IPF13361   | UNCLASSIRNA binding                                                                                     |
| CA3344 | 0.9 | 0.9 | 0.9 | IPF13359   | complemer unknown function orf19.2326           | 13359 IPF13360   | No significant S.c. match                                                                               |

|        |     |     |     |           |                                                |            |       |           |                                                                                                                       |
|--------|-----|-----|-----|-----------|------------------------------------------------|------------|-------|-----------|-----------------------------------------------------------------------------------------------------------------------|
| CA3345 | 1.0 | 1.1 | 1.0 | IPF13357  | 11278824..unknown function                     | orf19.2325 | 13357 | IPF13359  | CELL CYC molecular_function unknown                                                                                   |
| CA3346 | 0.9 | 0.9 | 1.0 | IPF13356  | complemer molybdopterin biosyntf               | orf19.2324 | 13356 | IPF13357  | TRANSCR transcription regulator activity                                                                              |
| CA3347 | 1.2 | 1.2 | 1.1 | ERP5      | complemer protein involved in membrane traff   |            | 15563 | IPF13356  | Metabolism of vitamins cofactors and prosthetic groups                                                                |
| CA3348 | 0.9 | 0.9 | 0.9 | RIO1      | complemer unknown function                     | orf19.2320 | 15559 | CaERP5    | PROTEIN I molecular_function unknown                                                                                  |
| CA3349 | 1.0 | 1.0 | 1.0 | IPF19588  | 11284820..unknown function                     |            | 19588 | CaRIO1    | UNCLASSIprotein kinase activity                                                                                       |
| CA3350 | 1.0 | 0.9 | 0.9 | RPL18A.5  | complemer ribosomal protein S18.e, 5-prime e   |            | 18348 | IPF19588  | UNCLASSImolecular_function unknown                                                                                    |
| CA3351 | 1.0 | 1.0 | 0.9 | IPF18347  | 11287619..unknown function                     | orf19.9503 | 18347 | CaRPL18A  | PROTEIN SYNTHESIS SUBCELLULAR LOCALISATION                                                                            |
| CA3352 | 0.9 | 0.9 | 1.0 | IPF16194  | complemer unknown function                     | orf19.9501 | 16195 | IPF18347  | No significant S.c. match                                                                                             |
| CA3353 | 1.1 | 1.0 | 1.1 | AUR1      | 11290569..aureobasidin-resistanc               | orf19.9500 | 11286 | IPF16194  | CLASSIFICmolecular_function unknown                                                                                   |
| CA3354 | 0.9 | 1.0 | 0.9 | IPF11281  | 11294397..similar to Saccharomy                | orf19.9499 | 11281 | CaAUR1    | Lipid fatty-ε transferase activity                                                                                    |
| CA3355 | 0.9 | 1.0 | 0.9 | IPF11277  | 11297435..unknown function                     | orf19.9498 | 11277 | IPF11281  | CELLULAF signal transducer activity                                                                                   |
| CA3356 | 1.1 | 1.0 | 1.0 | IPF9560   | 11300320..unknown function                     | orf19.9497 | 9560  | IPF11277  | Nucleotide metabolism CELL CYCLE AND DNA PROCESSING CELLULAR COMMUNICATION/SIGNAL TRANSDUCTION MECHANISM              |
| CA3357 | 0.9 | 1.0 | 1.0 | IPF9562   | complemer similar to Saccharomy                | orf19.1941 | 9562  | IPF9560   | CELL RESCUE DEFENSE AND VIRULENCE ""TRANSPORT FACILITATION                                                            |
| CA3358 | 1.1 | 1.2 | 1.0 | IPF19984  | complemer similar to Saccharomy                | orf19.1940 | 19984 | IPF9562   | CELL CYC structural molecule activity                                                                                 |
| CA3359 | 0.8 | 0.8 | 0.8 | IPF9566   | complemer unknown function                     | orf19.1939 | 9566  | IPF19984  | C-compour molecular_function unknown                                                                                  |
| CA3360 | 0.9 | 0.9 | 0.9 | IPF9568   | 11307329..unknown function                     | orf19.9493 | 9568  | IPF9566   | UNCLASSImolecular_function unknown                                                                                    |
| CA3361 | 1.0 | 1.0 | 0.9 | SNF1      | 11308238..serine/threonine protei              | orf19.9491 | 9571  | IPF9568   | No significant S.c. match                                                                                             |
| CA3362 | 1.0 | 1.1 | 1.1 | IPF9789   | 11313145..unknown function                     | orf19.9489 | 9789  | CaSNF1    | C-compour protein kinase activity                                                                                     |
| CA3363 | 1.1 | 1.1 | 1.0 | FRE32     | 11316949..ferric reductase (by ho              | orf19.9488 | 9791  | IPF9789   | UNCLASSImolecular_function unknown                                                                                    |
| CA3365 | 0.9 | 0.8 | 1.1 | ALG6      | 11322070..glucosyltransferase (b)              | orf19.1843 | 4661  | CaFRE32   | REGULATIoxidoreductase activity                                                                                       |
| CA3366 | 0.9 | 0.9 | 0.9 | FRE43     | 11332963..ferric reductase-like (b)            | orf19.9403 | 4664  | CaALG6    | C-compour transferase activity                                                                                        |
| CA3367 | 1.0 | 1.0 | 1.0 | IPF4667   | 11336168..unknown Function                     | orf19.9405 | 4667  | CaFRE43   | REGULATION OF/INTERACTION WITH CELLULAR ENVIRONMENT Other virulence attributes                                        |
| CA3368 | 0.9 | 0.9 | 0.9 | IPF4671   | complemer unknown Function                     | orf19.1849 | 4671  | IPF4667   | C-compour lyase activity                                                                                              |
| CA3369 | 1.0 | 1.0 | 1.0 | IPF4672   | 11341348..unknown Function                     | orf19.1850 | 4672  | IPF4671   | UNCLASSImolecular_function unknown                                                                                    |
| CA3370 | 1.0 | 0.9 | 1.0 | IPF4674   | complemer unknown Function                     | orf19.1852 | 4674  | IPF4672   | UNCLASSIprotein phosphatase activity                                                                                  |
| CA3372 | 3.2 | 2.9 | 2.7 | HHF22     | complemer histone H4 (by homolo                | orf19.1854 | 4677  | IPF4674   | UNCLASSImolecular_function unknown                                                                                    |
| CA3373 | 0.9 | 1.0 | 1.0 | SEO1      | 11346465..suppressor of sulfoxyd               | orf19.1855 | 19985 | CaHHF22   | TRANSCRIPTION SUBCELLULAR LOCALISATION                                                                                |
| CA3374 | 0.9 | 0.9 | 1.2 | IPF4683   | complemer unknown Function                     | orf19.1856 | 4683  | CaSEO1    | TRANSPORT FACILITATION                                                                                                |
| CA3375 | 0.9 | 1.0 | 1.1 | IPF4684   | 11351101..unknown Function                     | orf19.1857 | 4684  | IPF4683   | TRANSCR protein binding                                                                                               |
| CA3376 | 1.4 | 1.3 | 1.1 | LSC2.3EO1 | 11353073..succinate-CoA ligase beta subunit    |            | 4686  | IPF4684   | TRANSCRIPTION SUBCELLULAR LOCALISATION                                                                                |
| CA3377 | 1.0 | 1.0 | 1.0 | CLF1      | 11357226..pre-mRNA splicing fac                | orf19.7964 | 8347  | CaLSC2.3c | C-compound and carbohydrate metabolism ENERGY                                                                         |
| CA3378 | 1.0 | 1.0 | 1.0 | RUB1      | complemer ubiquitin-like protein (by homology) |            | 8348  | CaCLF1    | CELL CYC molecular_function unknown                                                                                   |
| CA3379 | 1.0 | 0.9 | 1.0 | IPF8350   | 11360004..putative methyltransfer              | orf19.331  | 8350  | CaRUB1    | PROTEIN SYNTHESIS ""PROTEIN FATE [folding modification destination] """"CELL RESCUE DEFENSE AND VIRULENCE ""CELL FATE |
| CA3380 | 1.0 | 1.0 | 0.9 | MSL5      | 11360855..branch point bridging p              | orf19.329  | 8351  | IPF8350   | PROTEIN I transferase activity                                                                                        |
| CA3381 | 0.9 | 0.9 | 0.9 | NPR2      | 11362697..nitrogen permease reg                | orf19.328  | 8357  | CaMSL5    | TRANSCR RNA binding                                                                                                   |
| CA3382 | 1.1 | 1.2 | 1.2 | HTA3      | 11364932..histone H2A F/Z variar               | orf19.327  | 8358  | CaNPR2    | Nitrogen ar molecular_function unknown                                                                                |
| CA3383 | 1.1 | 1.0 | 1.0 | IPF8359   | complemer unknown function                     | orf19.326  | 8359  | CaHTA3    | SUBCELLL DNA binding                                                                                                  |
| CA3384 | 1.0 | 0.9 | 0.9 | IPF8362   | complemer similar to Saccharomy                | orf19.325  | 8362  | IPF8359   | No significant S.c. match                                                                                             |
| CA3385 | 1.1 | 1.0 | 1.1 | DRS23     | complemer Membrane-spanning C                  | orf19.7955 | 6764  | IPF8362   | TRANSCR RNA binding                                                                                                   |
| CA3386 | 1.0 | 1.0 | 1.0 | IPF6758   | 11374192..unknown function                     | orf19.7954 | 6758  | CaDRS23   | TRANSPORT FACILITATION                                                                                                |
| CA3387 | 1.1 | 1.1 | 1.1 | MUP3      | 11376288..Very low affinity methic             | orf19.7953 | 6757  | IPF6758   | No significant S.c. match                                                                                             |
| CA3388 | 1.4 | 1.2 | 1.2 | IPF6755   | complemer unknown function                     | orf19.320  | 6755  | CaMUP3    | Amino acid transporter activity                                                                                       |
| CA3389 | 1.1 | 1.0 | 1.0 | IPF6754   | 11380356..unknown function                     | orf19.7951 | 6754  | IPF6755   | CLASSIFICATION NOT YET CLEAR-CUT                                                                                      |
| CA3390 | 0.9 | 0.9 | 1.0 | CAF17     | 11381000..Component of CCR4 transcription;     |            | 6752  | IPF6754   | UNCLASSImolecular_function unknown                                                                                    |
| CA3391 | 1.0 | 1.1 | 0.9 | PNP1      | 11382811..Purine Nucleoside Phc                | orf19.7949 | 6750  | CaCAF17   | TRANSCR molecular_function unknown                                                                                    |
| CA3392 | 1.1 | 1.2 | 1.1 | SEC13     | complemer Protein transport prote              | orf19.316  | 6749  | CaPNP1    | Nucleotide transferase activity                                                                                       |
| CA3393 | 1.0 | 0.9 | 1.0 | IPF6748   | 11385023..unknown function                     | orf19.315  | 6748  | CaSEC13   | CELLULAF molecular_function unknown                                                                                   |
| CA3394 | 1.0 | 0.9 | 1.0 | IPF6747   | complemer similar to Saccharomy                | orf19.7946 | 6747  | IPF6748   | CELL CYC molecular_function unknown                                                                                   |
| CA3395 | 1.0 | 1.1 | 1.0 | IPF13616  | complemer unknown function                     | orf19.3970 | 13616 | IPF6747   | TRANSCR transcription regulator activity                                                                              |
| CA3396 | 1.0 | 0.9 | 1.0 | IPF13617  | 11394387..unknown function                     | orf19.3971 | 13617 | IPF13616  | UNCLASSImolecular_function unknown                                                                                    |
| CA3397 | 1.0 | 1.0 | 1.1 | IPF13618  | complemer unknown function                     | orf19.3972 | 13618 | IPF13617  | No significant S.c. match                                                                                             |
| CA3398 | 1.1 | 1.0 | 1.0 | IPF13621  | 11396437..unknown function                     | orf19.3973 | 13621 | IPF13618  | PROTEIN I molecular_function unknown                                                                                  |
| CA3399 | 1.0 | 0.9 | 1.0 | PUT2      | complemer 1-pyrroline-5-carboxylε              | orf19.3974 | 13622 | IPF13621  | UNCLASSImolecular_function unknown                                                                                    |
| CA3400 | 1.0 | 1.0 | 0.9 | JNM1      | complemer mitosis protein, involve             | orf19.3976 | 13623 | CaPUT2    | Amino acid oxidoreductase activity                                                                                    |
| CA3401 | 1.0 | 0.9 | 1.1 | IPF8652   | complemer putative GTP-binding p               | orf19.3977 | 8652  | CaJNM1    | CELL CYC structural molecule activity                                                                                 |
| CA3402 | 1.0 | 0.9 | 1.0 | IPF8651   | 11402277..unknown function                     | orf19.3978 | 8651  | IPF8652   | UNCLASSImolecular_function unknown                                                                                    |
| CA3403 | 1.0 | 0.9 | 1.0 | IPF8650   | complemer RNA helicase (by hom                 | orf19.3980 | 8650  | IPF8651   | UNCLASSImolecular_function unknown                                                                                    |
| CA3404 | 1.0 | 1.0 | 0.9 | MAL31     | complemer maltose permease (by                 | orf19.3981 | 8647  | IPF8650   | CELL RES molecular_function unknown                                                                                   |
| CA3405 | 1.0 | 0.9 | 0.9 | IPF8644   | 11414245..maltase (by homology)                | orf19.3982 | 8644  | CaMAL31   | C-compour molecular_function unknown                                                                                  |
| CA3406 | 1.0 | 1.0 | 1.0 | IPF9711   | complemer unknown function                     | orf19.3983 | 9711  | IPF8644   | C-compour hydrolase activity                                                                                          |
| CA3407 | 0.8 | 0.6 | 0.9 | IPF9406   | 11426364..unknown function                     | orf19.1357 | 9406  | IPF9711   | UNCLASSImolecular_function unknown                                                                                    |
| CA3408 | 1.2 | 1.1 | 1.1 | IPF9407   | 11428214..similar to Saccharomy                | orf19.6151 | 9407  | IPF9406   | No significant S.c. match                                                                                             |
| CA3409 | 1.0 | 0.8 | 1.0 | IPF9410   | complemer similar to Saccharomy                | orf19.6148 | 9410  | IPF9407   | CELLULAF structural molecule activity                                                                                 |
| CA3410 | 1.2 | 1.2 | 1.0 | IPF9411   | 11433417..unknown function                     | orf19.6147 | 9411  | IPF9410   | CELL CYC structural molecule activity                                                                                 |
| CA3411 | 1.3 | 2.0 | 1.2 | IPF9413   | complemer unknown function                     | orf19.1356 | 9413  | IPF9411   | UNCLASSImolecular_function unknown                                                                                    |
| CA3412 | 1.0 | 1.0 | 1.0 | IPF9238   | complemer long chain fatty alcoho              | orf19.1356 | 9238  | IPF9413   | CELL CYC protein kinase activity,enzyme regulator activity                                                            |
| CA3413 | 0.9 | 1.0 | 1.1 | IPF9239   | complemer unknown function                     | orf19.6142 | 9239  | IPF9238   | No significant S.c. match                                                                                             |
| CA3414 | 1.0 | 0.9 | 1.0 | IPF9240   | complemer probable permease                    | orf19.6141 | 9240  | IPF9239   | No significant S.c. match                                                                                             |
| CA3415 | 1.2 | 1.1 | 1.0 | FRE30.53  | 11443642..Strong similarity to ferr            | orf19.6140 | 17765 | IPF9240   | C-compound and carbohydrate metabolism CELLULAR TRANSPORT AND TRANSPORT MECHANISMS SUBCELLULAR LOCALISATIO            |
| CA3416 | 1.3 | 1.3 | 1.1 | FRE30.3   | 11444320..Strong similarity to ferr            | orf19.6139 | 17763 | CaFRE30.! | REGULATION OF/INTERACTION WITH CELLULAR ENVIRONMENT Other virulence attributes                                        |
| CA3417 | 1.0 | 1.0 | 0.9 | FRE41     | 11446783..ferric reductase transr              | orf19.6138 | 12773 | CaFRE30.: | REGULATION OF/INTERACTION WITH CELLULAR ENVIRONMENT Other virulence attributes                                        |
| CA3418 | 1.0 | 0.9 | 1.0 | IPF12777  | 11449360..unknown function                     | orf19.6137 | 12777 | CaFRE41   | REGULATION OF/INTERACTION WITH CELLULAR ENVIRONMENT Other virulence attributes                                        |

|        |     |     |     |            |                                              |            |       |            |                                                                                                                 |
|--------|-----|-----|-----|------------|----------------------------------------------|------------|-------|------------|-----------------------------------------------------------------------------------------------------------------|
| CA3419 | 0.9 | 1.0 | 1.0 | IPF12778   | complemer ribosomal protein, mito            | orf19.6136 | 12778 | IPF12777   | TRANSCRIPTION SUBCELLULAR LOCALISATION                                                                          |
| CA3420 | 1.1 | 1.1 | 1.1 | SMX4       | 11452544..U6 snRNA-associated Sm-like pro    |            | 12779 | IPF12778   | PROTEIN structural molecule activity                                                                            |
| CA3421 | 1.0 | 1.0 | 1.0 | IPF19782   | complemer unknown function                   | orf19.1355 | 19782 | CaSMX4     | TRANSCR RNA binding                                                                                             |
| CA3422 | 0.9 | 1.0 | 0.9 | IPF17289   | 11454560..unknown function                   | orf19.1355 | 17289 | IPF19782   | CELL CYCLE AND DNA PROCESSING CONTROL OF CELLULAR ORGANIZATION SUBCELLULAR LOCALISATION                         |
| CA3423 | 1.0 | 1.0 | 1.0 | IPF3549    | complemer unknown function                   | orf19.597  | 3549  | IPF17289   | UNCLASSI molecular_function unknown                                                                             |
| CA3424 | 0.9 | 0.8 | 1.0 | NOP10      | complemer Nucleolar rRNA processing proteir  |            | 3544  | IPF3549    | Nitrogen and sulphur metabolism                                                                                 |
| CA3425 | 1.0 | 1.0 | 0.9 | IPF11873   | complemer similar to Saccharomy              | orf19.593  | 11873 | CaNOP10    | No signific RNA binding                                                                                         |
| CA3426 | 0.9 | 0.8 | 0.9 | IPF11869   | 11469541..unknown function                   | orf19.592  | 11869 | IPF11873   | CELLULAF molecular_function unknown                                                                             |
| CA3427 | 0.9 | 0.9 | 1.2 | IPF11865   | complemer unknown function                   | orf19.590  | 11865 | IPF11869   | UNCLASSI transferase activity                                                                                   |
| CA3428 | 1.1 | 1.0 | 1.2 | VPS21      | complemer GTP-binding protein (b             | orf19.589  | 11863 | IPF11865   | No significant S.c. match                                                                                       |
| CA3429 | 0.9 | 0.9 | 1.0 | IPF6380    | 11479667..unknown function                   | orf19.588  | 6380  | CaVPS21    | PROTEIN FATE [folding modification destination] ""CELLULAR TRANSPORT AND TRANSPORT MECHANISMS SUBCELLULAR LOCAL |
| CA3430 | 1.0 | 0.9 | 0.9 | IPF6382    | complemer unknown function                   | orf19.587  | 6382  | IPF6380    | UNCLASSI molecular_function unknown                                                                             |
| CA3431 | 0.9 | 1.1 | 1.0 | FUN9       | 11481359..Protein involved in ves            | orf19.586  | 6383  | IPF6382    | UNCLASSI molecular_function unknown                                                                             |
| CA3432 | 1.0 | 1.0 | 1.0 | MRPL17     | complemer ribosomal protein of th            | orf19.585  | 20133 | CaFUN9     | CELLULAF molecular_function unknown                                                                             |
| CA3433 | 1.0 | 0.9 | 1.0 | IPF6387.3  | 11484272..unknown function, 3-prime end      |            | 6387  | CaMRPL17   | PROTEIN structural molecule activity                                                                            |
| CA3434 | 1.1 | 0.9 | 0.9 | CCP1       | 11486211..Cytochrome-c peroxid               | orf19.584  | 6390  | IPF6387.3  | No significant S.c. match                                                                                       |
| CA3435 | 1.0 | 1.2 | 1.1 | IPF6391    | 11487140..similarity to mammalia             | orf19.583  | 6391  | CaCCP1     | CELL RES oxidoreductase activity                                                                                |
| CA3436 | 1.0 | 0.9 | 1.0 | NRD1       | 11489739..Involved in regulation             | orf19.581  | 6394  | IPF6391    | Amino acid oxidoreductase activity                                                                              |
| CA3437 | 1.1 | 1.2 | 1.2 | IPF15925   | complemer unknown function                   | orf19.1050 | 15925 | CaNRD1     | TRANSCR RNA binding                                                                                             |
| CA3438 | 0.6 | 0.3 | 1.0 | IPF11330   | 11495433..unknown function                   | orf19.2987 | 11330 | IPF15925   | REGULATION OF/INTERACTION WITH CELLULAR ENVIRONMENT SUBCELLULAR LOCALISATION                                    |
| CA3439 | 1.1 | 1.0 | 1.0 | IPF11329   | complemer unknown function                   | orf19.2986 | 11329 | IPF11330   | UNCLASSI molecular_function unknown                                                                             |
| CA3440 | 0.9 | 0.8 | 1.2 | IPF11328   | 11497940..unknown function                   | orf19.2985 | 11328 | IPF11329   | No significant S.c. match                                                                                       |
| CA3441 | 0.9 | 0.9 | 1.0 | MST1       | 11498686..mitochondrial threonyl             | orf19.2984 | 11327 | IPF11328   | No significant S.c. match                                                                                       |
| CA3442 | 0.8 | 0.6 | 0.9 | IPF11326   | complemer similar to Saccharomy              | orf19.2983 | 11326 | CaMST1     | SUBCELL ligase activity                                                                                         |
| CA3443 | 1.1 | 1.1 | 0.9 | IPF11324   | 11501524..unknown function                   | orf19.2982 | 11324 | IPF11326   | TRANSCR transcription regulator activity                                                                        |
| CA3444 | 0.9 | 0.7 | 1.0 | IPF11323   | 11503175..unknown function                   | orf19.2980 | 11323 | IPF11324   | PROTEIN enzyme regulator activity                                                                               |
| CA3445 | 0.9 | 1.0 | 1.0 | IPF7325    | 11505637..unknown function                   | orf19.2978 | 7325  | IPF11323   | UNCLASSI molecular_function unknown                                                                             |
| CA3446 | 1.0 | 0.9 | 1.1 | IPF7324    | 11506679..unknown function                   | orf19.2977 | 7324  | IPF7325    | No significant S.c. match                                                                                       |
| CA3447 | 1.0 | 1.0 | 1.1 | YPT70      | complemer GTP-binding protein (b             | orf19.2975 | 7322  | IPF7324    | UNCLASSI molecular_function unknown                                                                             |
| CA3448 | 0.9 | 0.9 | 0.9 | YKT6       | 11509430..Endoplasmic Reticulun              | orf19.2974 | 7321  | CaYPT70    | CELLULAR TRANSPORT AND TRANSPORT MECHANISMS SUBCELLULAR LOCALISATION                                            |
| CA3449 | 1.0 | 1.0 | 1.0 | IPF7320    | complemer unknown function                   | orf19.2973 | 7320  | CaYKT6     | PROTEIN transporter activity                                                                                    |
| CA3450 | 1.0 | 0.9 | 0.9 | PDE2       | complemer Nucleotide phosphodie              | orf19.2972 | 7318  | IPF7320    | UNCLASSI transporter activity                                                                                   |
| CA3451 | 1.0 | 1.0 | 1.0 | IPF7316    | complemer unknown function                   | orf19.1048 | 7316  | CaPDE2     | Nucleotide hydrolase activity                                                                                   |
| CA3452 | 0.8 | 0.8 | 0.7 | IPF10541   | 11523174..unknown function                   | orf19.1253 | 10541 | IPF7316    | CELL CYCLE AND DNA PROCESSING CONTROL OF CELLULAR ORGANIZATION SUBCELLULAR LOCALISATION                         |
| CA3453 | 1.0 | 1.1 | 1.1 | SEC23      | 11525673..Component of COPII c               | orf19.1254 | 10536 | IPF10541   | Phosphate DNA binding,transcription regulator activity                                                          |
| CA3454 | 0.9 | 0.9 | 0.9 | IPF10533.f | 11529937..unknown function, exo              | orf19.1255 | 10533 | CaSEC23    | CELLULAF enzyme regulator activity                                                                              |
| CA3455 | 1.0 | 0.9 | 0.9 | IPF10533.f | 11532466..unknown function, exo              | orf19.1256 | 19641 | IPF10533.f | C-compound and carbohydrate metabolism TRANSCRIPTION SUBCELLULAR LOCALISATION                                   |
| CA3456 | 1.0 | 0.9 | 0.9 | IPF19986   | complemer unknown function                   | orf19.1259 | 19986 | IPF10533.f | No significant S.c. match                                                                                       |
| CA3457 | 0.9 | 0.9 | 1.0 | IPF8521    | complemer unknown function                   | orf19.1260 | 8521  | IPF19986   | SUBCELLI molecular_function unknown                                                                             |
| CA3459 | 0.9 | 1.0 | 1.0 | CGT1.3F    | 11544397..mRNA capping enzym                 | orf19.1261 | 8518  | IPF8521    | TRANSCR RNA binding                                                                                             |
| CA3460 | 0.9 | 0.9 | 0.9 | CFL1       | complemer ferric reductase                   | orf19.1263 | 8516  | CaCGT1.3i  | TRANSCR nucleotidyltransferase activity                                                                         |
| CA3461 | 1.1 | 1.1 | 1.0 | CFL2       | complemer ferric reductase (by ho            | orf19.1264 | 8512  | CaCFL1     | REGULATION OF/INTERACTION WITH CELLULAR ENVIRONMENT SUBCELLULAR LOCALISATION Other virulence attributes         |
| CA3462 | 1.1 | 1.0 | 1.1 | IPF14959   | 11556303..similar to Saccharomy              | orf19.1265 | 14959 | CaCFL2     | REGULATION OF/INTERACTION WITH CELLULAR ENVIRONMENT Other virulence attributes                                  |
| CA3463 | 1.1 | 0.9 | 0.9 | ALG8       | complemer glucosyltransferase (b             | orf19.1659 | 12530 | IPF14959   | CELLULAF molecular_function unknown                                                                             |
| CA3464 | 0.9 | 1.1 | 1.0 | DBP5       | 11565513..RNA helicase (by hom               | orf19.1661 | 12528 | CaALG8     | C-compour transferase activity                                                                                  |
| CA3465 | 1.0 | 1.1 | 0.9 | MRP1.3F    | complemer Mitochondrial ribosomal protein of |            | 18330 | CaDBP5     | CLASSIFIC RNA binding,helicase activity                                                                         |
| CA3466 | 0.9 | 0.8 | 1.0 | MRP1.5F    | complemer mitochondrial ribosom              | orf19.1662 | 12526 | CaMRP1.3   | PROTEIN structural molecule activity                                                                            |
| CA3467 | 1.2 | 1.0 | 1.0 | MNT2       | 11570759..Alpha-1,2-mannosyltra              | orf19.1663 | 6319  | CaMRP1.5   | PROTEIN SYNTHESIS SUBCELLULAR LOCALISATION                                                                      |
| CA3468 | 1.0 | 1.0 | 1.0 | IPF6318    | complemer beta-glucosidase (by h             | orf19.1664 | 6318  | CaMNT2     | C-compour transferase activity                                                                                  |
| CA3469 | 1.2 | 1.1 | 1.1 | MNT1       | 11577042..Mannosyltransferase ir             | orf19.1665 | 6315  | IPF6318    | No significant S.c. match                                                                                       |
| CA3470 | 1.1 | 1.0 | 1.1 | IPF6310    | 11580716..unknown function                   | orf19.1666 | 6310  | CaMNT1     | C-compour transferase activity                                                                                  |
| CA3471 | 0.5 | 0.2 | 0.9 | IPF6308    | 11582920..unknown function                   | orf19.1667 | 6308  | IPF6310    | No significant S.c. match                                                                                       |
| CA3472 | 1.0 | 0.9 | 1.1 | IPF6305.E  | 11586885..unknown function, exon 2           |            | 6306  | IPF6308    | UNCLASSIFIED PROTEINS                                                                                           |
| CA3473 | 1.0 | 0.9 | 1.0 | IPF6305.E  | 11587374..unknown function, exo              | orf19.1668 | 6305  | IPF6305.e  | UNCLASSI molecular_function unknown                                                                             |
| CA3474 | 1.0 | 1.1 | 1.0 | AFG3       | complemer Member of the Sec18p               | orf19.1669 | 8090  | IPF6305.e  | UNCLASSI molecular_function unknown                                                                             |
| CA3475 | 1.0 | 0.9 | 1.0 | BRO1       | 11592591..required for normal res            | orf19.1670 | 8087  | CaAFG3     | PROTEIN l peptidase activity                                                                                    |
| CA3476 | 0.9 | 0.7 | 1.0 | NUP2.3EO   | 11599995..nucleoporine involved              | orf19.3583 | 3232  | CaBRO1     | CELL RES transporter activity                                                                                   |
| CA3477 | 1.0 | 1.0 | 1.0 | IPF3229    | complemer unknown function                   | orf19.3582 | 3229  | CaNUP2.3   | CELLULAF structural molecule activity                                                                           |
| CA3478 | 1.0 | 1.0 | 1.0 | IPF3227    | 11602346..similar to Saccharomy              | orf19.3581 | 3227  | IPF3229    | UNCLASSI transferase activity                                                                                   |
| CA3479 | 1.1 | 0.8 | 1.0 | ATP4       | complemer F1FO-ATPase compl                  | orf19.3579 | 3225  | IPF3227    | CELL CYC molecular_function unknown                                                                             |
| CA3480 | 1.0 | 1.1 | 1.1 | IPF3224    | complemer unknown function                   | orf19.3578 | 3224  | CaATP4     | ENERGY C structural molecule activity                                                                           |
| CA3481 | 1.1 | 1.0 | 0.9 | IPF3223    | 11605324..unknown function                   |            | 3223  | IPF3224    | No significant S.c. match                                                                                       |
| CA3482 | 1.0 | 1.0 | 1.0 | COQ5       | complemer C-methyltransferase (t             | orf19.3577 | 3222  | IPF3223    | No significant S.c. match                                                                                       |
| CA3483 | 4.2 | 4.1 | 2.0 | CDC19      | complemer pyruvate kinase (by ho             | orf19.3575 | 19988 | CaCOQ5     | Metabolism transferase activity                                                                                 |
| CA3484 | 1.0 | 1.0 | 1.0 | IPF3214    | 11610094..HSP-mitochondrial ch               | orf19.3574 | 3214  | CaCDC19    | C-compour transferase activity                                                                                  |
| CA3485 | 1.0 | 1.0 | 0.9 | IPF3213    | complemer similar to Saccharomy              | orf19.3573 | 3213  | IPF3214    | PROTEIN l molecular_function unknown                                                                            |
| CA3486 | 1.0 | 1.0 | 1.0 | IPF3206    | complemer unknown function                   | orf19.3572 | 3206  | IPF3213    | PROTEIN l hydrolase activity                                                                                    |
| CA3487 | 1.1 | 1.1 | 1.1 | IPF3203    | complemer unknown function                   | orf19.3569 | 3203  | IPF3206    | No significant S.c. match                                                                                       |
| CA3488 | 1.0 | 0.9 | 1.0 | IPF3198    | 11623067..unknown function                   | orf19.3568 | 3198  | IPF3203    | UNCLASSI molecular_function unknown                                                                             |
| CA3489 | 1.0 | 1.1 | 1.1 | IPF3195    | 11625182..unknown function                   | orf19.3567 | 3195  | IPF3198    | UNCLASSI molecular_function unknown                                                                             |
| CA3490 | 0.9 | 0.9 | 0.9 | IPF3192    | 11626857..unknown function                   | orf19.3565 | 3192  | IPF3195    | Metabolism of vitamins cofactors and prosthetic groups                                                          |
| CA3491 | 0.9 | 1.0 | 1.0 | RPC40      | 11628235..RNA polymerase (by h               | orf19.3564 | 3191  | IPF3192    | UNCLASSIFIED PROTEINS                                                                                           |

|        |     |     |     |          |                                     |               |                 |                                                                                                          |
|--------|-----|-----|-----|----------|-------------------------------------|---------------|-----------------|----------------------------------------------------------------------------------------------------------|
| CA3492 | 0.9 | 1.0 | 0.9 | IPF3189  | 11630027..unknown function          | orf19.3563    | 3189 CaRPC40    | TRANSSCR nucleotidyltransferase activity                                                                 |
| CA3493 | 1.0 | 1.0 | 0.9 | CDC7     | complemer serine/threonine protei   | orf19.3561    | 19635 IPF3189   | No significant S.c. match                                                                                |
| CA3494 | 1.0 | 1.1 | 1.0 | RPB5     | 11634820..DNA-directed RNA pol      | orf19.6340    | 17067 CaCDC7    | CELL CYC protein kinase activity                                                                         |
| CA3495 | 1.3 | 1.6 | 1.2 | RIB7     | complemer HTP reductase (By hor     | orf19.6341    | 17066 CaRPB5    | TRANSSCR nucleotidyltransferase activity                                                                 |
| CA3496 | 1.0 | 1.0 | 0.9 | IPF17064 | complemer unknown function          | orf19.6342    | 17064 CaRIB7    | Metabolism hydrolase activity                                                                            |
| CA3497 | 1.0 | 0.9 | 1.0 | FEN11    | 11638516..Fatty acid elongase       | rerorf19.6343 | 18329 IPF17064  | No significant S.c. match                                                                                |
| CA3498 | 0.9 | 0.8 | 0.9 | RBK1     | complemer Ribokinase (by homolc     | orf19.6344    | 15253 CaFEN11   | C-compour transferase activity                                                                           |
| CA3499 | 1.1 | 1.1 | 0.9 | RPG1     | complemer Translation initiation fa | orf19.6345    | 15252 CaRBK1    | C-compour transferase activity                                                                           |
| CA3500 | 1.0 | 1.0 | 1.0 | IPF14487 | complemer unknown function          | orf19.6346    | 14487 CaRPG1    | CELL CYC translation regulator activity                                                                  |
| CA3501 | 1.0 | 1.0 | 1.0 | CDC40    | 11645515..cell division control pro | orf19.6347    | 14486 IPF14487  | UNCLASSI molecular_function unknown                                                                      |
| CA3502 | 1.1 | 1.0 | 1.0 | IPF14485 | complemer unknown function          | orf19.6348    | 14485 CaCDC40   | CELL CYC RNA binding                                                                                     |
| CA3503 | 0.0 | 0.0 | 0.7 | IPF15890 | complemer cytoskeletal binding pr   | orf19.6349    | 15890 IPF14485  | No significant S.c. match                                                                                |
| CA3504 | 1.0 | 1.0 | 1.1 | IPF11369 | 11653630..unknown function          | orf19.6350    | 11369 IPF15890  | CELLULAR TRANSPORT AND TRANSPORT MECHANISMS CELL FATE SUBCELLULAR LOCALISATION                           |
| CA3505 | 0.9 | 1.0 | 1.0 | IPF11372 | 11654824..unknown function          | orf19.6351    | 11372 IPF11369  | No significant S.c. match                                                                                |
| CA3506 | 1.0 | 0.9 | 0.9 | IFA5     | complemer unknown function          | orf19.6353    | 11374 IPF11372  | No significant S.c. match                                                                                |
| CA3507 | 0.7 | 0.3 | 1.0 | IPF11375 | 11659625..unknown function          | orf19.6354    | 11375 CaIFA5    | Nucleotide metabolism CELL CYCLE AND DNA PROCESSING CELLULAR COMMUNICATION/SIGNAL TRANSDUCTION MECHANISM |
| CA3508 | 0.9 | 0.9 | 0.9 | RSA2     | complemer Involved in ribosome b    | orf19.6355    | 11376 IPF11375  | TRANSCRIPTION SUBCELLULAR LOCALISATION                                                                   |
| CA3509 | 0.9 | 1.0 | 1.0 | PRP6     | 11662111..snRNP(U4/U6)-associ       | orf19.6356    | 19783 CaRSA2    | TRANSSCR molecular_function unknown                                                                      |
| CA3510 | 1.1 | 1.0 | 1.0 | MAD1     | complemer coiled-coil protein invol | orf19.6357    | 11251 CaPRP6    | TRANSSCR RNA binding                                                                                     |
| CA3511 | 1.1 | 1.0 | 1.0 | MMS2     | 11667629..ubiquitin-conjugating e   | orf19.6358    | 11248 CaMAD1    | CELL CYC molecular_function unknown                                                                      |
| CA3512 | 1.0 | 1.0 | 0.9 | IPF11247 | complemer unknown function          | orf19.6359    | 11247 CaMMS2    | CELL CYCLE AND DNA PROCESSING                                                                            |
| CA3513 | 1.0 | 1.1 | 1.0 | IPF11246 | 11668915..unknown function          | orf19.6360    | 11246 IPF11247  | PROTEIN I molecular_function unknown                                                                     |
| CA3514 | 1.1 | 1.1 | 1.0 | IPF11245 | complemer similar to Saccharomy     | orf19.6362    | 11245 IPF11246  | No significant S.c. match                                                                                |
| CA3515 | 1.0 | 0.9 | 1.0 | MRPL15   | complemer mitochondrial ribosome    | orf19.6363    | 11656 IPF11245  | REGULATI protein binding                                                                                 |
| CA3517 | 1.1 | 1.1 | 1.0 | IFA22    | 11677479..unknown function          | orf19.1002    | 15371 CaMRPL15  | PROTEIN I structural molecule activity                                                                   |
| CA3518 | 0.9 | 1.0 | 1.0 | AMYG2    | 11686305..glucoamylase              | orf19.8614    | 6791 CaIFA22    | CELL CYCLE AND DNA PROCESSING SUBCELLULAR LOCALISATION                                                   |
| CA3519 | 1.0 | 0.9 | 0.9 | IPF6787  | 11689544..unknown function          | orf19.8613    | 6787 CaAMYG2    | C-compound and carbohydrate metabolism ENERGY SUBCELLULAR LOCALISATION                                   |
| CA3520 | 0.9 | 0.8 | 0.9 | IPF6785  | complemer unknown function          | orf19.997     | 6785 IPF6787    | No significant S.c. match                                                                                |
| CA3521 | 1.0 | 1.0 | 1.0 | IFA15    | complemer unknown function          | orf19.996     | 6784 IPF6785    | No significant S.c. match                                                                                |
| CA3522 | 0.9 | 1.0 | 0.9 | IPF20134 | complemer unknown function          | orf19.994     | 20134 CaIFA15   | Nucleotide metabolism CELL CYCLE AND DNA PROCESSING CELLULAR COMMUNICATION/SIGNAL TRANSDUCTION MECHANISM |
| CA3523 | 1.1 | 1.0 | 1.0 | IPF20135 | complemer unknown function          | orf19.993     | 20135 IPF20134  | No significant S.c. match                                                                                |
| CA3524 | 1.0 | 1.1 | 0.9 | LKH1.3   | complemer PROBABLE LEUKOTF          | orf19.992     | 6778 IPF20135   | TRANSCRIPTION SUBCELLULAR LOCALISATION                                                                   |
| CA3525 | 1.0 | 1.0 | 0.9 | DJP1     | complemer DnaJ-like protein invol   | orf19.8606    | 6776 CaLKH1.3   | Lipid fatty-ε peptidase activity                                                                         |
| CA3526 | 1.0 | 1.0 | 1.0 | MRPS5    | complemer Probable ribosomal prc    | orf19.8604    | 9936 CaDJP1     | PROTEIN I chaperone activity                                                                             |
| CA3527 | 1.2 | 1.0 | 0.9 | IPF9934  | complemer unknown function          | orf19.8603    | 9934 CaMRPS5    | PROTEIN I structural molecule activity                                                                   |
| CA3528 | 1.1 | 1.1 | 1.0 | GLY1     | complemer L-threonine aldolase      | orf19.8601    | 9931 IPF9934    | UNCLASSI molecular_function unknown                                                                      |
| CA3529 | 0.9 | 0.9 | 1.0 | IPF9929  | complemer unknown function          | orf19.8600    | 9929 CaGLY1     | Amino acid metabolism                                                                                    |
| CA3530 | 0.9 | 1.0 | 0.9 | IPF9926  | complemer alkaline phosphatase (    | orf19.984     | 9926 IPF9929    | UNCLASSI molecular_function unknown                                                                      |
| CA3532 | 1.0 | 1.0 | 1.0 | IPF13448 | complemer similar to Saccharomy     | orf19.6365    | 13448 IPF9926   | Phosphate metabolism SUBCELLULAR LOCALISATION                                                            |
| CA3533 | 0.6 | 0.5 | 1.0 | IPF13450 | 11719589..unknown function          | orf19.6366    | 13450 IPF13448  | CELLULAF protein phosphatase activity                                                                    |
| CA3534 | 0.8 | 1.2 | 1.1 | SSB1     | 11720670..heat shock protein 70     | orf19.6367    | 13454 IPF13450  | No significant S.c. match                                                                                |
| CA3535 | 1.0 | 0.9 | 0.9 | IPF13458 | complemer unknown function          | orf19.6369    | 13458 CaSSB1    | PROTEIN I chaperone activity                                                                             |
| CA3536 | 0.9 | 0.8 | 1.0 | IPF5414  | 11724185..unknown function          | orf19.6371    | 5414 IPF13458   | UNCLASSI protein kinase activity                                                                         |
| CA3537 | 1.3 | 1.1 | 1.1 | PSU1     | complemer suppressor of petit mu    | orf19.6373    | 5418 IPF5414    | No significant S.c. match                                                                                |
| CA3538 | 1.0 | 1.0 | 1.1 | ATP10    | 11728576..F1FO ATPase complex       | orf19.6374    | 5420 CaPSU1     | ENERGY hydrolase activity                                                                                |
| CA3539 | 2.6 | 2.5 | 1.4 | RPS22    | 11730432..ribosomal protein by h    | orf19.6375    | 5422 CaATP10    | PROTEIN I molecular_function unknown                                                                     |
| CA3540 | 1.0 | 1.1 | 1.0 | PTC5     | 11731874..Type 2C Protein Phos      | orf19.6376    | 5424 CaRPS22    | PROTEIN I structural molecule activity                                                                   |
| CA3541 | 0.8 | 0.8 | 0.9 | IPF5425  | complemer similar to Saccharomy     | orf19.6377    | 5425 CaPTC5     | PROTEIN I hydrolase activity                                                                             |
| CA3542 | 1.0 | 1.1 | 1.0 | IPF5426  | complemer putative methyltransfer   | orf19.6378    | 5426 IPF5425    | PROTEIN I transferase activity                                                                           |
| CA3543 | 1.0 | 1.0 | 1.0 | IPF5428  | 11736291..unknown function          | orf19.6379    | 5428 IPF5426    | UNCLASSI molecular_function unknown                                                                      |
| CA3544 | 0.9 | 0.7 | 1.0 | BPT1.3F  | complemer membrane transporter      | orf19.6382    | 12646 IPF5428   | No significant S.c. match                                                                                |
| CA3545 | 0.9 | 1.0 | 1.0 | BPT1.5F  | complemer membrane transporter      | orf19.6383    | 12648 CaBPT1.3F | CELL RESCUE DEFENSE AND VIRULENCE ""TRANSPORT FACILITATION                                               |
| CA3546 | 0.3 | 0.4 | 0.2 | ACO1     | complemer aconitate hydratase (b    | orf19.6385    | 12652 CaBPT1.5f | CELL RESCUE DEFENSE AND VIRULENCE ""TRANSPORT FACILITATION                                               |
| CA3547 | 1.1 | 1.0 | 1.0 | ADE13    | complemer adenylosuccinate lyase    | orf19.3870    | 12183 CaACO1    | C-compour lyase activity                                                                                 |
| CA3548 | 1.0 | 1.0 | 1.0 | IPF12179 | 11754067..unknown function          | orf19.3872    | 12179 CaADE13   | Nucleotide lyase activity                                                                                |
| CA3549 | 1.0 | 0.9 | 1.1 | ARC40    | 11755199..subunit of the Arp2/3 c   | orf19.3873    | 12178 IPF12179  | UNCLASSI molecular_function unknown                                                                      |
| CA3550 | 1.1 | 1.0 | 1.1 | IPF13228 | 11758649..unknown function          | orf19.3874    | 13228 CaARC40   | CELL FATI structural molecule activity                                                                   |
| CA3551 | 0.9 | 0.9 | 0.9 | IPF13229 | complemer unknown function          | orf19.3876    | 13229 IPF13228  | No significant S.c. match                                                                                |
| CA3552 | 0.9 | 0.9 | 1.0 | IPF13231 | 11763102..unknown function          | orf19.3877    | 13231 IPF13229  | UNCLASSI molecular_function unknown                                                                      |
| CA3553 | 0.9 | 0.8 | 1.1 | IFA16.5  | 11764065..unknown function, 5-pr    | orf19.3878    | 13232 IPF13231  | No significant S.c. match                                                                                |
| CA3554 | 1.0 | 1.0 | 1.1 | IPF7770  | complemer unknown function          | orf19.3881    | 7770 CaIFA16.5  | No significant S.c. match                                                                                |
| CA3555 | 0.8 | 0.8 | 1.0 | IPF7766  | complemer unknown function          | orf19.3884    | 7766 IPF7770    | UNCLASSI molecular_function unknown                                                                      |
| CA3556 | 0.9 | 0.9 | 0.9 | IPF7764  | 11771032..unknown function          | orf19.3885    | 7764 IPF7766    | CELLULAR TRANSPORT AND TRANSPORT MECHANISMS                                                              |
| CA3557 | 0.9 | 1.0 | 1.0 | IPF7763  | complemer unknown function          | orf19.3886    | 7763 IPF7764    | No significant S.c. match                                                                                |
| CA3558 | 1.0 | 0.9 | 1.0 | IPF7760  | complemer unknown function          | orf19.3887    | 7760 IPF7763    | CELL CYCLE AND DNA PROCESSING SUBCELLULAR LOCALISATION                                                   |
| CA3559 | 2.3 | 4.2 | 2.1 | PGI1     | complemer Glucose-6-phosphate i     | orf19.3888    | 7759 IPF7760    | No significant S.c. match                                                                                |
| CA3560 | 1.0 | 1.1 | 1.0 | CZF1     | 11792323..canal zinc finger protei  | orf19.3127    | 10612 CaPGI1    | C-compour isomerase activity                                                                             |
| CA3561 | 1.6 | 1.8 | 2.2 | SLY1     | 11794297..hydrophilic suppressor    | orf19.3128    | 10610 CaCZF1    | No significant S.c. match                                                                                |
| CA3562 | 1.0 | 1.0 | 1.0 | IPF7823  | complemer similar to Saccharomy     | orf19.3129    | 7823 CaSLY1     | CELLULAF protein binding                                                                                 |
| CA3563 | 1.0 | 0.9 | 1.0 | IPF7819  | complemer unknown function          | orf19.3130    | 7819 IPF7823    | CELL CYC hydrolase activity                                                                              |
| CA3564 | 1.0 | 1.0 | 1.0 | IPF7817  | 11799576..putative NADH-depend      | orf19.3131    | 7817 IPF7819    | UNCLASSI molecular_function unknown                                                                      |
| CA3565 | 1.0 | 0.9 | 1.0 | MSC2     | complemer Probable membrane pi      | orf19.3132    | 7815 IPF7817    | ENERGY                                                                                                   |



|        |     |     |     |            |                                             |            |       |            |                          |                                                                                               |
|--------|-----|-----|-----|------------|---------------------------------------------|------------|-------|------------|--------------------------|-----------------------------------------------------------------------------------------------|
| CA3566 | 1.0 | 1.0 | 1.0 | GUT2       | complemer Glycerol-3-phosphate              | orf19.3133 | 7812  | CaMSC2     | UNCLASSI                 | transporter activity                                                                          |
| CA3567 | 1.0 | 1.0 | 0.9 | IPF7804.5f | 11809479..unknown function, 5-pr            | orf19.3134 | 7804  | CaGUT2     | C-compour                | oxidoreductase activity                                                                       |
| CA3568 | 1.0 | 0.9 | 1.0 | IPF7804.3f | 11809962..unknown function, 3-pr            | orf19.3135 | 7802  | IPF7804.5f | No significant           | S.c. match                                                                                    |
| CA3569 | 1.0 | 1.2 | 0.9 | IPF3268    | 11812168..unknown function                  | orf19.3136 | 3268  | IPF7804.3f | UNCLASSI                 | molecular_function unknown                                                                    |
| CA3570 | 0.7 | 0.7 | 1.0 | NOP1       | complemer Fibrillarin                       | orf19.3138 | 3267  | IPF3268    | CELL CYCLE               | AND DNA PROCESSING                                                                            |
| CA3571 | 1.0 | 1.0 | 1.0 | IPF3264    | complemer unknown function                  | orf19.1065 | 3264  | CaNOP1     | TRANSCR                  | transferase activity                                                                          |
| CA3572 | 1.0 | 0.9 | 1.0 | IPF18321   | complemer unknown function                  |            | 18321 | IPF3264    | Lipid fatty-acid         | and isoprenoid metabolism                                                                     |
| CA3573 | 1.2 | 0.9 | 1.4 | RFA2       | complemer DNA replication factor            | orf19.2267 | 13308 | IPF18321   | No significant           | S.c. match                                                                                    |
| CA3574 | 0.9 | 1.0 | 1.0 | IPF19584   | 11822330..unknown function                  | orf19.2266 | 19584 | CaRFA2     | CELL CYC                 | DNA binding                                                                                   |
| CA3575 | 0.9 | 0.9 | 1.0 | IPF11108   | complemer unknown function                  | orf19.2265 | 11108 | IPF19584   | SUBCELLL                 | protein binding                                                                               |
| CA3576 | 0.9 | 1.0 | 0.9 | IPF11107   | 11826725..probably stearyl-CoA              | orf19.2264 | 11107 | IPF11108   | CELL CYC                 | molecular_function unknown                                                                    |
| CA3577 | 1.0 | 0.9 | 1.0 | IPF11106   | 11828594..unknown function                  | orf19.2263 | 11106 | IPF11107   | Lipid fatty-acid         | and isoprenoid metabolism ""SUBCELLULAR LOCALISATION                                          |
| CA3578 | 0.9 | 0.9 | 0.9 | IPF11105   | complemer probable quinone oxid             | orf19.2262 | 11105 | IPF11106   | No significant           | S.c. match                                                                                    |
| CA3579 | 1.0 | 1.1 | 0.9 | HSH49      | complemer spliceosome-associate             | orf19.2261 | 11104 | IPF11105   | CLASSIFIC                | molecular_function unknown                                                                    |
| CA3580 | 0.9 | 1.0 | 1.0 | IPF16141   | complemer unknown function                  | orf19.2260 | 16141 | CaHSH49    | TRANSCR                  | RNA binding                                                                                   |
| CA3581 | 1.0 | 1.1 | 1.1 | IPF16143   | 11833107..unknown function                  | orf19.2259 | 16143 | IPF16141   | UNCLASSIFIED             | PROTEINS                                                                                      |
| CA3582 | 1.0 | 1.1 | 1.1 | IPF15466   | 11834150..unknown function                  | orf19.2258 | 15466 | IPF16143   | No significant           | S.c. match                                                                                    |
| CA3583 | 1.0 | 0.9 | 1.1 | IPF20137   | complemer unknown function                  | orf19.2257 | 20137 | IPF15466   | No significant           | S.c. match                                                                                    |
| CA3584 | 1.0 | 1.0 | 1.0 | IPF15468   | complemer unknown function                  | orf19.2256 | 15468 | IPF20137   | UNCLASSI                 | molecular_function unknown                                                                    |
| CA3585 | 0.9 | 1.0 | 1.0 | IFT1       | complemer unknown function                  | orf19.2253 | 16720 | IPF15468   | UNCLASSI                 | molecular_function unknown                                                                    |
| CA3586 | 1.0 | 1.0 | 1.0 | IFT3       | complemer unknown function                  | orf19.2252 | 15939 | CaIFT1     | No significant           | S.c. match                                                                                    |
| CA3587 | 0.9 | 1.0 | 1.0 | AAH1       | complemer adenosine deaminase               | orf19.2251 | 10117 | CaIFT3     | No significant           | S.c. match                                                                                    |
| CA3588 | 0.9 | 1.0 | 1.0 | SPE3       | complemer putrescine aminopropyl            | orf19.2250 | 10115 | CaAAH1     | Nucleotide               | hydrolase activity                                                                            |
| CA3589 | 1.0 | 0.9 | 1.1 | IPF10113   | 11847040..unknown function                  | orf19.2249 | 10113 | CaSPE3     | Secondary                | transferase activity                                                                          |
| CA3590 | 0.9 | 1.1 | 1.0 | ARE2       | 11849844..acyl-CoA sterol acyltra           | orf19.2248 | 10110 | IPF10113   | UNCLASSI                 | molecular_function unknown                                                                    |
| CA3591 | 1.0 | 1.0 | 1.0 | IFT2       | 11853104..unknown function                  | orf19.2247 | 12902 | CaARE2     | Lipid fatty-:transferase | activity                                                                                      |
| CA3592 | 1.0 | 1.0 | 1.0 | IPF12900   | 11854883..unknown function                  | orf19.2246 | 12900 | CaIFT2     | TRANSPORT                | FACILITATION                                                                                  |
| CA3593 | 1.1 | 1.0 | 1.1 | YPT71      | complemer GTP-binding protein of            | orf19.2245 | 12899 | IPF12900   | UNCLASSI                 | molecular_function unknown                                                                    |
| CA3594 | 1.1 | 1.0 | 1.0 | IPF6076.3  | complemer unknown function, 3-pr            | orf19.4922 | 6076  | CaYPT71    | CELLULAF                 | hydrolase activity                                                                            |
| CA3595 | 1.0 | 1.1 | 0.9 | IPF6079    | complemer putative permease (by             | orf19.4923 | 6079  | IPF6076.3  | UNCLASSI                 | enzyme regulator activity                                                                     |
| CA3596 | 1.0 | 1.0 | 1.0 | IPF6085    | 11863395..unknown function                  | orf19.4924 | 6085  | IPF6079    | C-compound               | and carbohydrate metabolism TRANSPORT FACILITATION                                            |
| CA3597 | 1.2 | 1.4 | 1.1 | BN11       | complemer regulator of budding (b           | orf19.4927 | 6091  | IPF6085    | No significant           | S.c. match                                                                                    |
| CA3598 | 1.0 | 1.1 | 1.0 | SEC2       | complemer GDP/GTP exchange fe               | orf19.1239 | 6094  | CaBN11     | CELL CYC                 | protein binding                                                                               |
| CA3599 | 1.0 | 0.9 | 1.0 | IPF19785   | 11879559..unknown function                  | orf19.4929 | 19785 | CaSEC2     | CELLULAF                 | enzyme regulator activity                                                                     |
| CA3600 | 1.0 | 0.9 | 1.3 | SPC3       | complemer signal peptidase subur            | orf19.4930 | 15621 | IPF19785   | TRANSCR                  | translation regulator activity                                                                |
| CA3601 | 1.0 | 1.0 | 1.1 | IPF15618   | complemer cysteinyl-tRNA synthet            | orf19.4931 | 15618 | CaSPC3     | PROTEIN I                | peptidase activity                                                                            |
| CA3602 | 1.6 | 2.3 | 1.4 | RPL14B.3   | 11887878..ribosomal protein L14B, 3-prime e |            | 12937 | IPF15618   | PROTEIN I                | ligase activity                                                                               |
| CA3603 | 1.0 | 1.0 | 1.0 | MEF1       | complemer mitochondrial translati           | orf19.4932 | 12940 | CaRPL14B   | PROTEIN I                | RNA binding                                                                                   |
| CA3604 | 1.0 | 1.0 | 1.0 | IPF12942   | complemer delta-12 fatty acid des           | orf19.4933 | 12942 | CaMEF1     | PROTEIN I                | translation regulator activity                                                                |
| CA3605 | 1.0 | 1.0 | 1.0 | IPF3865    | complemer unknown function                  | orf19.22   | 3865  | IPF12942   | No significant           | S.c. match                                                                                    |
| CA3606 | 1.1 | 1.0 | 1.1 | RTA3       | 11902679..Unknown function                  | orf19.23   | 3859  | IPF3865    | SUBCELLULAR              | LOCALISATION                                                                                  |
| CA3607 | 1.1 | 1.2 | 1.0 | RTA2       | 11905078..Unknown function                  | orf19.24   | 3858  | CaRTA3     | UNCLASSIFIED             | PROTEINS                                                                                      |
| CA3608 | 1.1 | 1.1 | 1.1 | IPF3857    | 11906652..unknown function                  | orf19.25   | 3857  | CaRTA2     | UNCLASSI                 | transporter activity                                                                          |
| CA3609 | 1.1 | 1.1 | 1.1 | IPF3856    | 11907851..similar to Saccharomy             | orf19.26   | 3856  | IPF3857    | UNCLASSI                 | transferase activity                                                                          |
| CA3610 | 1.0 | 1.1 | 1.0 | IPF3854    | 11909848..unknown function                  | orf19.27   | 3854  | IPF3856    | PROTEIN I                | enzyme regulator activity                                                                     |
| CA3611 | 1.1 | 1.1 | 1.0 | IPF3853    | complemer unknown function                  | orf19.28   | 3853  | IPF3854    | No significant           | S.c. match                                                                                    |
| CA3612 | 1.1 | 1.0 | 1.0 | IPF3852    | 11912464..unknown function                  | orf19.29   | 3852  | IPF3853    | Nucleotide               | transporter activity                                                                          |
| CA3613 | 1.0 | 1.0 | 1.0 | SPF1       | complemer P-type ATPase                     | orf19.30   | 3849  | IPF3852    | CELL CYC                 | molecular_function unknown                                                                    |
| CA3614 | 1.1 | 1.1 | 1.0 | IPF8878    | 11918837..unknown function                  | orf19.31   | 8878  | CaSPF1     | REGULATI                 | transporter activity                                                                          |
| CA3615 | 1.0 | 0.9 | 1.0 | GIT1       | complemer glycerophosphoinosito             | orf19.34   | 8874  | IPF8878    | CELL RESCUE              | DEFENSE AND VIRULENCE ""CELL FATE                                                             |
| CA3616 | 0.9 | 1.1 | 0.9 | ASN1       | 11927767..asparagine synthetase (by homol   |            | 19994 | CaGIT1     | Lipid fatty-:transporter | activity                                                                                      |
| CA3617 | 1.0 | 1.0 | 1.0 | IPF9069    | 11929978..unknown function                  | orf19.199  | 9069  | CaASN1     | Amino acid               | ligase activity                                                                               |
| CA3618 | 1.1 | 1.0 | 0.9 | THO1       | complemer suppressor of the hpr1            | orf19.200  | 20138 | IPF9069    | ENERGY                   |                                                                                               |
| CA3619 | 1.0 | 1.0 | 1.0 | CDC47.5    | complemer cell division control pro         | orf19.202  | 9065  | CaTHO1     | UNCLASSI                 | molecular_function unknown                                                                    |
| CA3620 | 1.0 | 1.1 | 1.1 | IPF9063    | complemer similar to Saccharomy             | orf19.203  | 9063  | CaCDC47.   | CELL CYC                 | DNA binding                                                                                   |
| CA3621 | 1.0 | 1.1 | 1.0 | IPF8942    | 11940739..unknown function                  | orf19.204  | 8942  | IPF9063    | TRANSCR                  | molecular_function unknown                                                                    |
| CA3622 | 1.0 | 1.1 | 1.0 | IPF12022   | 11947135..extracellular alpha-1,4-          | orf19.7836 | 12022 | IPF8942    | No significant           | S.c. match                                                                                    |
| CA3623 | 0.9 | 0.8 | 1.0 | IPF15911   | 11952810..unknown function                  | orf19.7838 | 15911 | IPF12022   | No significant           | S.c. match                                                                                    |
| CA3625 | 1.0 | 0.8 | 0.9 | CYR1.3F    | complemer adenylate cyclase, 3-p            | orf19.1261 | 12339 | IPF15911   | No significant           | S.c. match                                                                                    |
| CA3626 | 1.0 | 0.9 | 0.9 | CYR1.5F    | complemer adenylate cyclase, 5-p            | orf19.1261 | 12336 | CaCYR1.3i  | Nucleotide               | lyase activity                                                                                |
| CA3627 | 1.1 | 1.1 | 1.0 | IPF18318   | 11965072..unknown function                  | orf19.1261 | 18318 | CaCYR1.5i  | Nucleotide               | metabolism CELL CYCLE AND DNA PROCESSING CELLULAR COMMUNICATION/SIGNAL TRANSDUCTION MECHANISM |
| CA3628 | 1.1 | 0.9 | 1.0 | IPF18316.3 | complemer unknown function, 3-pr            | orf19.1261 | 18317 | IPF18318   | UNCLASSI                 | molecular_function unknown                                                                    |
| CA3629 | 1.0 | 1.1 | 1.1 | IPF18316.5 | complemer unknown function, 5-pr            | orf19.1261 | 18316 | IPF18316.3 | Nitrogen                 | and sulphur metabolism                                                                        |
| CA3630 | 1.0 | 1.0 | 1.0 | IPF8129    | 11970757..unknown function                  | orf19.1260 | 8129  | IPF18316.5 | No significant           | S.c. match                                                                                    |
| CA3631 | 1.0 | 1.0 | 0.9 | TIM54      | 11972073..Translocase for the ins           | orf19.1260 | 8130  | IPF8129    | No significant           | S.c. match                                                                                    |
| CA3632 | 1.0 | 1.0 | 0.9 | DFR1       | complemer dihydrofolate reductas            | orf19.5142 | 8131  | CaTIM54    | PROTEIN I                | transporter activity                                                                          |
| CA3633 | 0.8 | 0.6 | 1.0 | IFA19      | 11974620..unknown function                  | orf19.5141 | 8136  | CaDFR1     | Amino acid               | oxidoreductase activity                                                                       |
| CA3634 | 1.1 | 1.1 | 1.1 | IFA25      | 11977577..unknown function                  | orf19.5140 | 8138  | CaIFA19    | UNCLASSIFIED             | PROTEINS                                                                                      |
| CA3635 | 0.9 | 0.9 | 0.9 | IFA20      | 11980400..unknown function                  | orf19.5139 | 8140  | CaIFA25    | Nucleotide               | metabolism CELL CYCLE AND DNA PROCESSING CELLULAR COMMUNICATION/SIGNAL TRANSDUCTION MECHANISM |
| CA3636 | 1.0 | 1.0 | 0.9 | IFA21      | 11983197..unknown function                  | orf19.1260 | 16529 | CaIFA20    | Nucleotide               | metabolism CELL CYCLE AND DNA PROCESSING CELLULAR COMMUNICATION/SIGNAL TRANSDUCTION MECHANISM |
| CA3637 | 1.0 | 0.9 | 1.0 | IPF9255    | complemer unknown function                  | orf19.5136 | 9255  | CaIFA21    | CELL RESCUE              | DEFENSE AND VIRULENCE                                                                         |
| CA3638 | 1.0 | 1.0 | 1.0 | IPF9252    | 11990889..unknown function                  | orf19.5134 | 9252  | IPF9255    | UNCLASSI                 | molecular_function unknown                                                                    |

|        |     |     |     |            |                                               |            |       |            |                                                                                                                 |
|--------|-----|-----|-----|------------|-----------------------------------------------|------------|-------|------------|-----------------------------------------------------------------------------------------------------------------|
| CA3639 | 1.2 | 1.0 | 1.2 | IPF9251    | complemer unknown function                    | orf19.5133 | 9251  | IPF9252    | UNCLASSIFIED PROTEINS                                                                                           |
| CA3640 | 1.0 | 1.0 | 0.9 | VPS24      | 12002153..endosomal Vps proteir               | orf19.2031 | 4120  | IPF9251    | Lipid fatty-ε DNA binding                                                                                       |
| CA3641 | 1.0 | 1.0 | 0.9 | IPF4122    | complemer unknown function                    | orf19.2032 | 4122  | CaVPS24    | PROTEIN I molecular_function unknown                                                                            |
| CA3642 | 0.9 | 1.0 | 1.0 | IPF4123    | complemer unknown function                    | orf19.2033 | 4123  | IPF4122    | No significant S.c. match                                                                                       |
| CA3643 | 0.9 | 0.9 | 0.9 | IPF4124    | complemer unknown function                    | orf19.2034 | 4124  | IPF4123    | No significant S.c. match                                                                                       |
| CA3644 | 1.0 | 1.0 | 1.1 | IPF4126    | complemer unknown function                    | orf19.2035 | 4126  | IPF4124    | No significant S.c. match                                                                                       |
| CA3645 | 1.0 | 1.0 | 0.9 | IPF4127    | complemer putative dimeric dihydr             | orf19.2036 | 4127  | IPF4126    | TRANSPORT FACILITATION                                                                                          |
| CA3646 | 1.0 | 1.0 | 0.9 | IPF4128    | complemer unknown function                    | orf19.2037 | 4128  | IPF4127    | No significant S.c. match                                                                                       |
| CA3647 | 1.1 | 0.9 | 1.4 | IPF4129    | 12009894..unknown function                    | orf19.2038 | 4129  | IPF4128    | No significant S.c. match                                                                                       |
| CA3648 | 0.9 | 0.9 | 1.0 | MSF1       | complemer phenylalanine--tRNA li              | orf19.2039 | 4131  | IPF4129    | UNCLASSIFIED PROTEINS                                                                                           |
| CA3649 | 1.0 | 1.0 | 1.0 | IPF4132    | complemer unknown function                    | orf19.2040 | 4132  | CaMSF1     | PROTEIN I ligase activity                                                                                       |
| CA3650 | 1.0 | 0.9 | 1.0 | IPF4134    | 12014907..unknown function                    | orf19.2041 | 4134  | IPF4132    | Lipid fatty-ε molecular_function unknown                                                                        |
| CA3651 | 0.9 | 0.9 | 1.1 | MSS1       | complemer Mitochondrial GTPase                | orf19.2042 | 7447  | IPF4134    | CELL CYC molecular_function unknown                                                                             |
| CA3652 | 1.0 | 1.1 | 1.1 | NBP35      | 12018549..Nucleotide-binding pro              | orf19.2043 | 7450  | CaMSS1     | TRANSCRIPTION PROTEIN SYNTHESIS SUBCELLULAR LOCALISATION                                                        |
| CA3653 | 0.9 | 0.9 | 0.9 | IPF7451    | 12019654..unknown function                    | orf19.2044 | 7451  | CaNBP35    | UNCLASSIFIED PROTEINS                                                                                           |
| CA3654 | 1.0 | 1.0 | 1.0 | IPF7452    | 12021656..unknown function                    | orf19.2045 | 7452  | IPF7451    | No significant S.c. match                                                                                       |
| CA3655 | 1.1 | 0.9 | 1.0 | POT13      | complemer Acetyl-CoA C-acyltrans              | orf19.2046 | 7453  | IPF7452    | UNCLASSI molecular_function unknown                                                                             |
| CA3656 | 1.4 | 1.2 | 1.1 | IPF7456    | complemer unknown function                    | orf19.2047 | 7456  | CaPOT13    | Lipid fatty-acid and isoprenoid metabolism ""ENERGY SUBCELLULAR LOCALISATION                                    |
| CA3657 | 1.3 | 1.0 | 1.3 | IPF7459    | complemer unknown function                    | orf19.2049 | 7459  | IPF7456    | UNCLASSI molecular_function unknown                                                                             |
| CA3658 | 1.0 | 1.1 | 1.0 | TGL1       | 12028548..Triacylglycerol lipase (lorf        | 19.2050    | 7463  | IPF7459    | No significant S.c. match                                                                                       |
| CA3660 | 1.0 | 0.9 | 0.9 | IPF17794   | 12030737..unknown function                    |            | 17994 | CaTGL1     | Lipid fatty-ε hydrolase activity                                                                                |
| CA3661 | 0.9 | 1.0 | 1.0 | IPF17991   | complemer unknown function                    | orf19.6465 | 17991 | IPF17794   | No significant S.c. match                                                                                       |
| CA3662 | 1.0 | 1.1 | 1.0 | IPF17021   | 12037174..unknown function                    | orf19.6464 | 17021 | IPF17991   | C-compound and carbohydrate metabolism SUBCELLULAR LOCALISATION                                                 |
| CA3663 | 0.9 | 0.9 | 1.0 | IPF11432   | complemer unknown function                    | orf19.6463 | 11432 | IPF17021   | Nucleotide metabolism                                                                                           |
| CA3664 | 1.0 | 1.0 | 1.0 | IPF11433   | complemer unknown function, 3-pr              | orf19.6462 | 11433 | IPF11432   | UNCLASSI molecular_function unknown                                                                             |
| CA3666 | 1.0 | 1.0 | 0.9 | IPF11435   | complemer unknown function                    | orf19.6461 | 11435 | IPF11433   | UNCLASSI molecular_function unknown                                                                             |
| CA3667 | 1.0 | 1.0 | 1.0 | IPF16323   | 12043118..similar to Saccharomy               | orf19.6460 | 16323 | IPF11435   | ENERGY C chaperone activity                                                                                     |
| CA3668 | 1.1 | 1.0 | 1.0 | DPP3       | complemer Diacylglycerol Pyrophc              | orf19.6459 | 19996 | IPF16323   | PROTEIN I hydrolase activity                                                                                    |
| CA3669 | 1.1 | 1.1 | 1.0 | IPF19997   | 12048788..by homology to S. cerevisiae: U6 s  |            | 19997 | CaDPP3     | Lipid fatty-ε hydrolase activity                                                                                |
| CA3670 | 1.0 | 1.0 | 1.0 | IPF13934   | 12049541..unknown function                    | orf19.6458 | 13934 | IPF19997   | No significant S.c. match                                                                                       |
| CA3671 | 1.0 | 1.0 | 1.0 | IPF13933   | complemer unknown function                    | orf19.6457 | 13933 | IPF13934   | No significant S.c. match                                                                                       |
| CA3672 | 0.9 | 1.0 | 0.9 | IPF13669   | 12053915..unknown function                    | orf19.6456 | 13669 | IPF13933   | C-compour molecular_function unknown                                                                            |
| CA3673 | 0.9 | 0.8 | 0.9 | IPF13667   | complemer unknown function                    | orf19.6455 | 13667 | IPF13669   | No significant S.c. match                                                                                       |
| CA3674 | 1.1 | 1.0 | 1.0 | IPF19529.ε | 12056759..unknown function, exo               | orf19.6454 | 19529 | IPF13667   | UNCLASSI molecular_function unknown                                                                             |
| CA3675 | 1.0 | 1.0 | 0.9 | IPF19529.ε | 12058245..unknown function, exo               | orf19.6453 | 18311 | IPF19529.ε | No significant S.c. match                                                                                       |
| CA3676 | 1.0 | 1.5 | 1.2 | RBP1       | complemer rapamycin-binding prot              | orf19.6452 | 8077  | IPF19529.ε | No significant S.c. match                                                                                       |
| CA3677 | 1.0 | 1.0 | 0.9 | SOU3       | 12070103..putative sorbitol utilizat          | orf19.732  | 8391  | CaRBP1     | PROTEIN I isomerase activity                                                                                    |
| CA3678 | 1.0 | 0.9 | 1.0 | IPF8392    | 12071254..unknown function                    | orf19.731  | 8392  | CaSOU3     | ENERGY SUBCELLULAR LOCALISATION                                                                                 |
| CA3679 | 1.0 | 1.0 | 1.0 | IPF20142   | 12073061..unknown function                    | orf19.730  | 20142 | IPF8392    | CLASSIFIC molecular_function unknown                                                                            |
| CA3680 | 0.9 | 0.8 | 1.0 | IPF8395    | 12076135..unknown function                    | orf19.729  | 8395  | IPF20142   | CELL FATε enzyme regulator activity                                                                             |
| CA3681 | 0.9 | 0.8 | 0.9 | IPF19787   | complemer unknown function                    | orf19.728  | 19787 | IPF8395    | No significant S.c. match                                                                                       |
| CA3683 | 1.0 | 1.0 | 1.0 | PPZ1       | complemer ser/thr phosphatase re              | orf19.726  | 13615 | IPF19787   | UNCLASSI protein binding                                                                                        |
| CA3684 | 1.0 | 0.9 | 1.0 | IPF13613   | 12100562..unknown function                    | orf19.725  | 13613 | CaPPZ1     | CELL RES protein phosphatase activity                                                                           |
| CA3685 | 1.1 | 1.2 | 1.1 | IPF19540   | complemer unknown function                    | orf19.723  | 19540 | IPF13613   | No significant S.c. match                                                                                       |
| CA3686 | 1.0 | 1.1 | 0.9 | IPF4890    | 12111800..unknown function                    | orf19.1364 | 4890  | IPF19540   | TRANSCR molecular_function unknown                                                                              |
| CA3687 | 0.9 | 0.9 | 0.9 | IPF4889    | complemer unknown function                    | orf19.6264 | 4889  | IPF4890    | TRANSPO transporter activity                                                                                    |
| CA3688 | 1.0 | 1.0 | 1.1 | YIP3.3     | 12115214..protein of unknown function, 3-prir |            | 4885  | IPF4889    | C-compound and carbohydrate metabolism ENERGY TRANSCRIPTION CELL FATE SUBCELLULAR LOCALISATION                  |
| CA3689 | 1.4 | 1.9 | 1.6 | RPS22A     | 12116904..ribosomal protein S15ε              | orf19.6265 | 4882  | CaYIP3.3   | CELLULAF molecular_function unknown                                                                             |
| CA3690 | 1.6 | 1.3 | 1.3 | RPS14B     | 12118211..ribosomal protein (by homology)     |            | 4881  | CaRPS22A   | PROTEIN I structural molecule activity                                                                          |
| CA3691 | 0.9 | 0.9 | 0.9 | IPF4880    | 12118919..unknown function                    | orf19.6266 | 4880  | CaRPS14B   | PROTEIN I RNA binding                                                                                           |
| CA3692 | 1.0 | 1.0 | 1.0 | IPF4876    | 12122185..unknown function                    | orf19.6267 | 4876  | IPF4880    | TRANSCRIPTION CELL FATE SUBCELLULAR LOCALISATION                                                                |
| CA3693 | 0.9 | 0.9 | 1.0 | IPF4874    | 12125054..unknown function                    | orf19.6268 | 4874  | IPF4876    | No significant S.c. match                                                                                       |
| CA3694 | 1.0 | 0.9 | 1.0 | IPF4872.3f | complemer unknown function, 3-pr              | orf19.6269 | 4873  | IPF4874    | UNCLASSI molecular_function unknown                                                                             |
| CA3695 | 1.0 | 1.1 | 1.0 | IPF4872.5f | complemer unknown function, 5-pr              | orf19.6270 | 4872  | IPF4872.3f | PROTEIN FATE [folding modification destination] ""CELLULAR TRANSPORT AND TRANSPORT MECHANISMS SUBCELLULAR LOCAL |
| CA3696 | 1.0 | 1.1 | 1.0 | IPF4868    | 12131198..unknown function                    | orf19.1365 | 4868  | IPF4872.5f | No significant S.c. match                                                                                       |
| CA3697 | 0.9 | 0.8 | 1.0 | IPF4866    | complemer similar to Saccharomy               | orf19.1365 | 4866  | IPF4868    | SUBCELLL molecular_function unknown                                                                             |
| CA3698 | 1.0 | 0.8 | 1.0 | IPF4861    | 12137078..unknown function                    | orf19.6274 | 4861  | IPF4866    | PROTEIN I peptidase activity                                                                                    |
| CA3699 | 1.0 | 1.0 | 1.0 | IPF4860    | complemer similarity to ribosomal             | orf19.6275 | 4860  | IPF4861    | No significant S.c. match                                                                                       |
| CA3700 | 0.9 | 1.0 | 0.9 | IPF4859    | complemer unknown function                    | orf19.6276 | 4859  | IPF4860    | CLASSIFIC protein kinase activity                                                                               |
| CA3701 | 1.1 | 1.1 | 1.0 | IPF11936.ε | complemer unknown function, 5-pr              | orf19.1365 | 19586 | IPF4859    | No significant S.c. match                                                                                       |
| CA3703 | 0.8 | 0.8 | 0.8 | IPF11945   | complemer unknown function                    | orf19.6281 | 11945 | IPF11936.ε | No significant S.c. match                                                                                       |
| CA3704 | 0.9 | 0.9 | 1.0 | IPF5671    | complemer unknown function                    | orf19.4946 | 5671  | IPF11945   | No significant S.c. match                                                                                       |
| CA3705 | 1.1 | 0.9 | 1.2 | MSH6       | 12160626..DNA mismatch repair ε               | orf19.4945 | 5670  | IPF5671    | No significant S.c. match                                                                                       |
| CA3706 | 1.8 | 2.7 | 1.4 | PSA2       | complemer mannose-1-phosphate                 | orf19.4943 | 5668  | CaMSH6     | CELL CYC DNA binding                                                                                            |
| CA3707 | 0.8 | 0.8 | 0.5 | TYE7       | 12170168..Basic helix-loop-helix t            | orf19.4941 | 5663  | CaPSA2     | C-compound and carbohydrate metabolism CONTROL OF CELLULAR ORGANIZATION                                         |
| CA3708 | 1.0 | 1.0 | 1.1 | HIP1       | 12171574..Histidine permease (by              | orf19.4940 | 7876  | CaTYE7     | C-compour DNA binding,transcription regulator activity                                                          |
| CA3709 | 0.9 | 1.0 | 1.0 | IPF7880    | 12173743..unknown function                    | orf19.4939 | 7880  | CaHIP1     | Amino acid metabolism CELLULAR TRANSPORT AND TRANSPORT MECHANISMS REGULATION OF/INTERACTION WITH CELLULA        |
| CA3710 | 0.8 | 0.8 | 0.9 | CHS3.5F    | 12180005..chitin-UDP acetyl-gluc              | orf19.4938 | 7886  | IPF7880    | UNCLASSI molecular_function unknown                                                                             |
| CA3711 | 1.1 | 1.1 | 1.0 | CHS3.3F    | 12180306..chitin-UDP acetyl-gluc              | orf19.4937 | 7889  | CaCHS3.5f  | C-compound and carbohydrate metabolism CELL FATE CONTROL OF CELLULAR ORGANIZATION SUBCELLULAR LOCALISATION      |
| CA3712 | 1.0 | 1.1 | 1.1 | IPF7891    | complemer unknown function                    | orf19.4936 | 7891  | CaCHS3.3f  | C-compour transferase activity                                                                                  |
| CA3713 | 1.1 | 1.1 | 1.0 | OPS4       | complemer opaque - phase specifi              | orf19.4934 | 15453 | IPF7891    | No significant S.c. match                                                                                       |
| CA3714 | 1.0 | 0.9 | 1.0 | IPF16223   | 12194080..unknown function                    | orf19.1163 | 16223 | CaOPS4     | No significant S.c. match                                                                                       |

|        |     |     |     |            |                                              |             |       |            |                                 |                                         |                          |         |
|--------|-----|-----|-----|------------|----------------------------------------------|-------------|-------|------------|---------------------------------|-----------------------------------------|--------------------------|---------|
| CA3715 | 1.0 | 1.0 | 1.0 | IPF6205    | 12197699..unknown function                   | orf19.4164  | 6205  | IPF16223   | UNCLASSI                        | molecular_function                      | unknown                  |         |
| CA3716 | 0.9 | 1.0 | 0.9 | IPF6203    | complemer unknown function                   | orf19.1164; | 6203  | IPF6205    | UNCLASSI                        | RNA binding                             |                          |         |
| CA3717 | 1.0 | 1.0 | 1.0 | IPF6192    | 12205742..unknown function                   | orf19.1164; | 6192  | IPF6203    | TRANSCRIPTION                   |                                         |                          |         |
| CA3718 | 1.0 | 0.8 | 0.9 | POP7       | complemer Nuclear RNase P subu               | orf19.1164; | 6191  | IPF6192    | UNCLASSI                        | molecular_function                      | unknown                  |         |
| CA3719 | 0.9 | 0.9 | 1.0 | IPF6190    | 12207199..unknown function                   | orf19.1164; | 6190  | CaPOP7     | TRANSCR                         | RNA binding                             |                          |         |
| CA3720 | 0.9 | 0.8 | 1.0 | IFL3       | complemer unknown function                   | orf19.1164; | 6188  | IPF6190    | No significant                  | S.c. match                              |                          |         |
| CA3721 | 0.9 | 0.9 | 0.9 | IPF6186    | complemer unknown function                   | orf19.1164; | 6186  | CaFL3      | CELL RESCUE                     | DEFENSE AND VIRULENCE ""CELL FATE       |                          |         |
| CA3722 | 1.0 | 1.1 | 1.0 | PHO13      | 12212650..4-nitrophenylphosphat              | orf19.4172  | 6184  | IPF6186    | No significant                  | S.c. match                              |                          |         |
| CA3723 | 1.0 | 1.1 | 0.9 | DPH2       | 12213872..Diphtheria toxin resista           | orf19.4173  | 6183  | CaPHO13    | Phosphate metabolism            | SUBCELLULAR LOCALISATION                |                          |         |
| CA3724 | 1.0 | 1.0 | 1.0 | IPF6181    | complemer similar to Saccharomy              | orf19.4174  | 6181  | CaDPH2     | Amino acid molecular_function   | unknown                                 |                          |         |
| CA3725 | 0.9 | 1.1 | 0.9 | TOK1.3     | complemer Outward-rectifier potas            | orf19.4175  | 6179  | IPF6181    | Nucleotide                      | transporter activity                    |                          |         |
| CA3726 | 0.9 | 1.1 | 0.9 | IPF6175    | complemer unknown function                   | orf19.4176  | 6175  | CaTOK1.3   | CELLULAF                        | transporter activity                    |                          |         |
| CA3727 | 0.9 | 1.1 | 0.9 | HIS5.3F    | complemer Histidinol-phosphate ai            | orf19.4177  | 6173  | IPF6175    | PROTEIN                         | structural molecule activity            |                          |         |
| CA3729 | 0.9 | 1.0 | 1.0 | IPF11901   | complemer unknown function                   | orf19.4179  | 11901 | CaHIS5.3F  | Amino acid transferase          | activity                                |                          |         |
| CA3730 | 1.0 | 0.9 | 0.9 | IPF11900   | 12223031..unknown function                   | orf19.4180  | 11900 | IPF11901   | No significant                  | S.c. match                              |                          |         |
| CA3731 | 1.0 | 1.0 | 1.1 | SPC2       | 12224114..signal peptidase 18 kD             | orf19.4181  | 11899 | IPF11900   | PROTEIN                         | transporter activity                    |                          |         |
| CA3732 | 0.9 | 1.0 | 1.0 | IPF11898   | complemer unknown function                   | orf19.4182  | 11898 | CaSPC2     | PROTEIN                         | protein binding                         |                          |         |
| CA3733 | 1.2 | 1.1 | 1.0 | IPF11897   | 12225959..unknown function                   | orf19.1165; | 11897 | IPF11898   | UNCLASSIFIED                    | PROTEINS                                |                          |         |
| CA3735 | 1.0 | 1.0 | 0.9 | IPF5534    | 12229437..5-oxo-1,2,5-tricarboxil            | orf19.2184  | 5534  | IPF11897   | C-compound and carbohydrate     | metabolism                              | SUBCELLULAR LOCALISATION |         |
| CA3736 | 0.9 | 1.3 | 1.1 | IPF5533    | complemer ABC transporter (by hc             | orf19.2183  | 5533  | IPF5534    | UNCLASSIFIED                    | PROTEINS                                |                          |         |
| CA3737 | 1.0 | 1.0 | 1.0 | BLM3       | 12235622..bleomycin resistance (             | orf19.2182  | 5529  | IPF5533    | TRANSPO                         | transporter activity,hydrolase activity |                          |         |
| CA3738 | 1.1 | 1.0 | 1.0 | IPF5526    | complemer unknown function                   | orf19.2180  | 5526  | CaBLM3     | UNCLASSI                        | molecular_function                      | unknown                  |         |
| CA3739 | 1.3 | 1.4 | 1.2 | RPS10.3    | complemer ribosomal protein, 3-prime end (by | orf19.2179  | 5524  | IPF5526    | UNCLASSI                        | molecular_function                      | unknown                  |         |
| CA3740 | 1.1 | 1.1 | 1.0 | SIT1       | complemer Ferrioxamine B perme:              | orf19.2179  | 5522  | CaRPS10.   | PROTEIN                         | structural molecule activity            |                          |         |
| CA3741 | 1.0 | 0.9 | 1.0 | MRS4       | complemer RNA splicing protein ai            | orf19.2178  | 5513  | CaSIT1     | CELL RES                        | transporter activity                    |                          |         |
| CA3742 | 1.0 | 0.9 | 0.9 | IFM3       | complemer 2-hydroxyacid dehydro              | orf19.2176  | 5511  | CaMRS4     | TRANSCR                         | transporter activity                    |                          |         |
| CA3743 | 1.1 | 1.5 | 1.1 | IPF19998   | 12253720..unknown function                   | orf19.2175  | 19998 | CaIFM3     | C-compound and carbohydrate     | metabolism                              |                          |         |
| CA3744 | 1.0 | 0.9 | 0.9 | RAD57      | 12255054..DNA-repair like protein            | orf19.2174  | 10144 | IPF19998   | UNCLASSI                        | oxidoreductase activity                 |                          |         |
| CA3745 | 1.0 | 1.0 | 0.9 | MAF1       | 12257282..nuclear protein by hom             | orf19.2173  | 10146 | CaRAD57    | CELL                            | CYC protein binding                     |                          |         |
| CA3746 | 1.0 | 1.0 | 1.0 | ARA1       | 12258916..D-arabinose dehydrog               | orf19.2172  | 10148 | CaMAF1     | PROTEIN                         | molecular_function                      | unknown                  |         |
| CA3747 | 1.1 | 1.5 | 1.0 | IPF10153   | complemer membrane transporter               | orf19.2170  | 10153 | CaARA1     | C-compou                        | oxidoreductase activity                 |                          |         |
| CA3748 | 0.8 | 1.1 | 0.9 | IPF7385    | 12269447..unknown function                   | orf19.3430  | 7385  | IPF10153   | UNCLASSI                        | molecular_function                      | unknown                  |         |
| CA3749 | 0.9 | 1.0 | 1.0 | IPF7389    | complemer unknown function                   | orf19.3429  | 7389  | IPF7385    | No significant                  | S.c. match                              |                          |         |
| CA3750 | 1.1 | 1.0 | 1.1 | IPF7377    | 12278199..unknown function                   | orf19.3428  | 7377  | IPF7389    | No significant                  | S.c. match                              |                          |         |
| CA3751 | 1.1 | 1.0 | 0.9 | IPF7378    | 12279864..unknown function                   | orf19.3427  | 7378  | IPF7377    | UNCLASSIFIED                    | PROTEINS                                |                          |         |
| CA3752 | 1.6 | 2.3 | 1.6 | TIF51.3    | 12281670..translation initiation fac         | orf19.3426  | 20144 | IPF7378    | No significant                  | S.c. match                              |                          |         |
| CA3753 | 1.0 | 1.1 | 1.0 | IPF14743   | 12284650..unknown function                   | orf19.3425  | 14743 | CaTIF51.3  | UNCLASSI                        | translation regulator activity          |                          |         |
| CA3754 | 0.6 | 0.8 | 0.6 | TIF3       | 12286967..translation initiation fac         | orf19.3423  | 16643 | IPF14743   | UNCLASSIFIED                    | PROTEINS                                |                          |         |
| CA3755 | 1.0 | 1.0 | 1.0 | IPF17743   | 12289536..Unknown function                   |             | 17743 | CaTIF3     | PROTEIN                         | translation regulator activity          |                          |         |
| CA3756 | 1.0 | 1.0 | 1.0 | IPF8884    | complemer unknown function                   | orf19.3422  | 8884  | IPF17743   | TRANSCR                         | transcription regulator activity        |                          |         |
| CA3757 | 1.1 | 1.4 | 1.0 | MAE1       | 12300384..mitochondrial malic en:            | orf19.3419  | 8888  | IPF8884    | UNCLASSI                        | molecular_function                      | unknown                  |         |
| CA3758 | 1.0 | 0.9 | 1.0 | IPF8889    | complemer putative arginase (by h            | orf19.1092; | 8889  | CaMAE1     | C-compou                        | oxidoreductase activity                 |                          |         |
| CA3759 | 0.9 | 0.9 | 1.0 | IPF13139   | 12310473..unknown function                   | orf19.2910  | 13139 | IPF8889    | Amino acid metabolism           | Nitrogen and sulphur metabolism         | SUBCELLULAR LOCALISATION |         |
| CA3760 | 0.9 | 1.0 | 1.1 | ERG26      | complemer C-3 sterol dehydrogen:             | orf19.2909  | 13138 | IPF13139   | No significant                  | C.c. match                              |                          |         |
| CA3761 | 1.0 | 1.0 | 1.1 | IFR3       | complemer unknown function                   | orf19.2908  | 13137 | CaERG26    | Lipid fatty- $\alpha$           | oxidoreductase activity                 |                          |         |
| CA3762 | 1.0 | 0.9 | 1.0 | IPF13135   | complemer unknown function                   | orf19.2907  | 13135 | CaIFR3     | SUBCELLULAR                     | LOCALISATION                            |                          |         |
| CA3763 | 0.9 | 0.9 | 1.0 | IPF13070   | complemer unknown function                   | orf19.2906  | 13070 | IPF13135   | No significant                  | S.c. match                              |                          |         |
| CA3764 | 1.0 | 1.0 | 0.9 | IPF13072   | complemer unknown function                   | orf19.2905  | 13072 | IPF13070   | No significant                  | S.c. match                              |                          |         |
| CA3765 | 0.9 | 0.9 | 1.0 | IPF18298   | 12321271..unknown function                   | orf19.2904  | 18298 | IPF13072   | No significant                  | S.c. match                              |                          |         |
| CA3766 | 1.6 | 1.6 | 1.0 | IPF18298.1 | 12321970..unknown function, 3-pr             | orf19.2903  | 16014 | IPF18298   | Lipid fatty-acid and isoprenoid | metabolism                              |                          |         |
| CA3767 | 0.9 | 1.1 | 0.9 | NUP60      | complemer Putative nuclear pore $\epsilon$   | orf19.2901  | 13471 | IPF18298.1 | No significant                  | S.c. match                              |                          |         |
| CA3768 | 0.9 | 1.0 | 1.0 | IPF13467   | complemer Putative peroxisomal 2             | orf19.2899  | 13467 | CaNUP60    | CELLULAF                        | structural molecule activity            |                          |         |
| CA3769 | 1.0 | 0.9 | 1.0 | IPF13465   | complemer Putative anion transpo             | orf19.2898  | 13465 | IPF13467   | ENERGY                          | SUBCELLULAR LOCALISATION                |                          |         |
| CA3770 | 1.0 | 1.0 | 0.9 | SOU2       | 12331220..Sorbitol utilization prot          | orf19.2897  | 13462 | IPF13465   | CLASSIFIC                       | transporter activity                    |                          |         |
| CA3771 | 1.0 | 1.0 | 1.0 | SOU1       | 12332930..Sorbitol utilization prot          | orf19.2896  | 11150 | CaSOU2     | ENERGY                          | SUBCELLULAR LOCALISATION                |                          |         |
| CA3772 | 0.9 | 1.0 | 0.9 | VMA8       | complemer CANAL VACUOLAR A                   | orf19.2895  | 11151 | CaSOU1     | ENERGY                          | SUBCELLULAR LOCALISATION                |                          |         |
| CA3773 | 0.9 | 1.0 | 1.0 | IPF11153   | 12335071..unknown function                   | orf19.2893  | 11153 | CaVMA8     | CELLULAF                        | transporter activity                    |                          |         |
| CA3774 | 1.0 | 1.0 | 1.0 | IPF10437   | 12340660..budding protein-like (b            | orf19.2892  | 10437 | IPF11153   | CELL                            | CYC molecular_function                  | unknown                  |         |
| CA3775 | 1.0 | 1.0 | 0.9 | AFG1       | complemer ATPase family gene (b              | orf19.2891  | 10436 | IPF10437   | CELL                            | FATT                                    | molecular_function       | unknown |
| CA3776 | 0.8 | 0.5 | 0.9 | IPF10435   | complemer unknown function                   | orf19.2890  | 10435 | CaAFG1     | CLASSIFIC                       | hydrolase activity                      |                          |         |
| CA3777 | 1.1 | 1.1 | 1.0 | IPF10432   | 12347748..unknown function                   | orf19.2889  | 10432 | IPF10435   | UNCLASSIFIED                    | PROTEINS                                |                          |         |
| CA3778 | 0.9 | 0.9 | 1.0 | IPF10431   | complemer unknown function                   | orf19.2888  | 10431 | IPF10432   | UNCLASSI                        | molecular_function                      | unknown                  |         |
| CA3779 | 1.0 | 0.9 | 1.0 | IPF11221   | 12353921..unknown function                   | orf19.5841  | 11221 | IPF10431   | No significant                  | S.c. match                              |                          |         |
| CA3780 | 1.0 | 1.0 | 1.0 | IPF11222   | complemer unknown function                   | orf19.5840  | 11222 | IPF11221   | No significant                  | S.c. match                              |                          |         |
| CA3781 | 1.0 | 1.0 | 1.0 | IPF11224   | 12355232..similar to Saccharomy              | orf19.5839  | 11224 | IPF11222   | No significant                  | S.c. match                              |                          |         |
| CA3782 | 1.1 | 1.1 | 1.1 | SER2       | 12356659..phosphoserine phosph               | orf19.5838  | 11225 | IPF11224   | Lipid fatty- $\alpha$           | transporter activity                    |                          |         |
| CA3783 | 1.0 | 1.0 | 1.0 | IPF11226   | complemer unknown function                   | orf19.5837  | 11226 | CaSER2     | Amino acid                      | hydrolase activity                      |                          |         |
| CA3784 | 1.0 | 1.0 | 1.0 | IPF11229   | complemer similar to Saccharomy              | orf19.5835  | 11229 | IPF11226   | UNCLASSI                        | molecular_function                      | unknown                  |         |
| CA3785 | 0.9 | 1.0 | 1.0 | IPF19788   | 12359996..similar to Saccharomy              | orf19.5834  | 19788 | IPF11229   | TRANSCR                         | molecular_function                      | unknown                  |         |
| CA3786 | 1.2 | 1.1 | 1.2 | UFD1       | 12363355..Ubiquitin fusion degrac            | orf19.5833  | 14267 | IPF19788   | TRANSCR                         | protein binding                         |                          |         |
| CA3787 | 0.9 | 0.9 | 1.0 | HPT1       | complemer hypoxanthine guanine               | orf19.5832  | 14266 | CaUFD1     | PROTEIN                         | protein binding                         |                          |         |
| CA3788 | 1.1 | 1.0 | 1.0 | IPF16445   | complemer unknown function                   | orf19.5831  | 16445 | CaHPT1     | Nucleotide                      | transferase activity                    |                          |         |

|        |     |      |     |          |                                          |             |       |           |                                                        |
|--------|-----|------|-----|----------|------------------------------------------|-------------|-------|-----------|--------------------------------------------------------|
| CA3789 | 1.0 | 2.4  | 1.0 | IPF11217 | 12368047..similar to Saccharomy          | orf19.1325; | 11217 | IPF16445  | No significant S.c. match                              |
| CA3790 | 1.0 | 1.0  | 0.9 | IPF11215 | 12371174..unknown function               | orf19.1325  | 11215 | IPF11217  | PROTEIN I chaperone activity                           |
| CA3791 | 1.0 | 0.9  | 1.1 | IPF11212 | complemer similar to Saccharomy          | orf19.5827  | 11212 | IPF11215  | TRANSCR RNA binding                                    |
| CA3792 | 1.1 | 1.1  | 1.1 | UGA5     | complemer GABA-SPECIFIC TRA              | orf19.5826  | 11211 | IPF11212  | CELL CYC enzyme regulator activity                     |
| CA3793 | 1.0 | 1.0  | 1.1 | IPF5701  | 12377945..unknown function               |             | 5701  | CaUGA5    | No significant S.c. match                              |
| CA3794 | 1.1 | 0.9  | 1.0 | NCB2     | complemer Transcriptional repress        | orf19.5825  | 5700  | IPF5701   | No significant structural molecule activity            |
| CA3795 | 0.9 | 0.9  | 0.9 | IPF5699  | complemer Abhydrolase by homol           | orf19.5824  | 5699  | CaNCB2    | TRANSCR transcription regulator activity               |
| CA3796 | 1.0 | 1.2  | 1.0 | SGT2     | complemer small glutamine-rich te        | orf19.5823  | 5697  | IPF5699   | UNCLASSIFIED PROTEINS                                  |
| CA3797 | 1.0 | 1.0  | 0.9 | IPF5623  | complemer unknown function               | orf19.5821  | 5693  | CaSGT2    | UNCLASSIMolecular_function unknown                     |
| CA3799 | 0.9 | 1.0  | 1.0 | IPF7198  | 12387813..unknown function               | orf19.1001  | 7198  | IPF5623   | UNCLASSIMolecular_function unknown                     |
| CA3800 | 1.2 | 1.6  | 1.2 | RPL7A.3  | complemer 60S Ribosomal Protein L7-A     | 3-pri       | 7197  | IPF7198   | CELL CYCLE AND DNA PROCESSING SUBCELLULAR LOCALISATION |
| CA3801 | 1.0 | 1.0  | 1.0 | UGA4     | 12394943..GABA-specific transpo          | orf19.1001  | 7194  | CaRPL7A.  | PROTEIN I structural molecule activity                 |
| CA3802 | 1.4 | 2.8  | 1.0 | AUT7.EXO | complemer microtubule-associated protein | ess         | 12408 | CaUGA4    | No significant transporter activity                    |
| CA3803 | 0.9 | 1.0  | 0.9 | IPF12407 | 12398139..unknown function               | orf19.2481  | 12407 | CaAUT7.e) | PROTEIN I protein binding                              |
| CA3804 | 1.1 | 0.8  | 1.1 | RIM1     | 12399164..telomere-binding prote         | orf19.2483  | 12405 | IPF12407  | No significant S.c. match                              |
| CA3805 | 0.9 | 0.8  | 1.1 | IPF12403 | complemer unknown function               | orf19.2484  | 12403 | CaRIM1    | No significant S.c. match                              |
| CA3806 | 1.1 | 1.1  | 1.0 | IPF9224  | 12401531..similar to Saccharomy          | orf19.2485  | 9224  | IPF12403  | PROTEIN I molecular_function unknown                   |
| CA3807 | 1.1 | 1.0  | 1.0 | IPF9225  | complemer unknown function               | orf19.2487  | 9225  | IPF9224   | CELL CYC structural molecule activity                  |
| CA3808 | 0.9 | 0.9  | 0.9 | FAL1     | 12406774..ATP-dependent RNA I            | orf19.2488  | 9226  | IPF9225   | Nucleotide molecular_function unknown                  |
| CA3809 | 1.1 | 1.5  | 1.1 | KAP123   | 12408257..karyopherin-beta prote         | orf19.2489  | 9227  | CaFAL1    | TRANSCR RNA binding,helicase activity                  |
| CA3810 | 1.0 | 1.1  | 1.0 | IPF9230  | 12412100..similar to Saccharomy          | orf19.2492  | 9230  | CaKAP123  | PROTEIN I protein binding                              |
| CA3811 | 0.9 | 1.1  | 1.0 | PET112   | complemer glutamyl-tRNA (GLN) ε          | orf19.2494  | 9233  | IPF9230   | CELLULAF signal transducer activity                    |
| CA3812 | 0.9 | 1.0  | 1.0 | GSL22    | complemer 1,3-beta-D-glucan synt         | orf19.2495  | 4913  | CaPET112  | PROTEIN I molecular_function unknown                   |
| CA3813 | 1.0 | 1.1  | 1.0 | FRP1     | 12421523..member of the FRP fam          | orf19.2496  | 4026  | CaGSL22   | C-compound and carbohydrate metabolism                 |
| CA3814 | 1.0 | 0.9  | 1.0 | IPF4023  | 12423340..unknown function               | orf19.2498  | 4023  | CaFRP1    | C-compound and carbohydrate metabolism                 |
| CA3815 | 1.0 | 1.0  | 0.9 | CYP7     | complemer peptidyl-prolyl cis-trans      | orf19.2499  | 4018  | IPF4023   | CELL FATI molecular_function unknown                   |
| CA3816 | 0.9 | 0.9  | 1.0 | IPF4017  | 12426495..unknown function               | orf19.2500  | 4017  | CaCYP7    | TRANSCR chaperone activity                             |
| CA3818 | 1.4 | 1.2  | 1.2 | IPF6695  | 12443908..unknown function               | orf19.5773  | 6995  | IPF4017   | No significant S.c. match                              |
| CA3819 | 1.0 | 0.9  | 0.9 | IPF6993  | 12451889..unknown function               | orf19.5772  | 6993  | IPF6995   | UNCLASSIMolecular_function unknown                     |
| CA3820 | 1.0 | 1.0  | 1.0 | PBP2     | 12453231..PAB1 binding protein (         | orf19.5771  | 6992  | IPF6993   | UNCLASSIMolecular_function unknown                     |
| CA3821 | 1.2 | 1.1  | 1.0 | IPF6990  | complemer unknown function               | orf19.5770  | 6990  | CaPBP2    | TRANSCR molecular_function unknown                     |
| CA3822 | 0.9 | 1.1  | 0.9 | CUS2     | 12459077..cold sensitive U2 snR          | orf19.5767  | 20001 | IPF6990   | UNCLASSIMolecular_function unknown                     |
| CA3823 | 1.0 | 1.0  | 0.7 | IPF10651 | complemer unknown function               | orf19.5765  | 10651 | CaCUS2    | TRANSCR RNA binding                                    |
| CA3824 | 1.0 | 1.1  | 1.0 | SK18     | 12462546..antiviral protein-like (b)     | orf19.5764  | 10653 | IPF10651  | TRANSCR structural molecule activity                   |
| CA3825 | 1.0 | 1.0  | 0.9 | IPF10654 | complemer D-arabinitol dehydroge         | orf19.5763  | 10654 | CaSK18    | CELL CYC translation regulator activity                |
| CA3826 | 1.0 | 1.0  | 1.1 | IPF20148 | 12466008..unknown function               | orf19.5762  | 20148 | IPF10654  | ENERGY SUBCELLULAR LOCALISATION                        |
| CA3827 | 1.0 | 1.3  | 1.0 | IPF10662 | 12469047..unknown function               | orf19.5760  | 10662 | IPF20148  | No significant S.c. match                              |
| CA3828 | 1.0 | 1.0  | 1.0 | SNQ2     | 12471725..multidrug resistance pr        | orf19.5759  | 13913 | IPF10662  | No significant S.c. match                              |
| CA3829 | 1.2 | 1.1  | 1.1 | PPQ1     | complemer phosphoprotein phosph          | orf19.5758  | 13917 | CaSNQ2    | Lipid fatty-ε transporter activity                     |
| CA3830 | 0.9 | 0.9  | 1.0 | SSF1     | 12479848..mating protein (by hor         | orf19.6589  | 8195  | CaPPQ1    | PROTEIN SYNTHESIS                                      |
| CA3831 | 1.0 | 10.7 | 1.0 | VMA22    | complemer vacuolar ATPase asse           | orf19.6590  | 8194  | CaSSF1    | CELL FATI RNA binding                                  |
| CA3832 | 1.0 | 1.0  | 1.0 | IPF8193  | complemer unknown function               | orf19.6591  | 8193  | CaVMA22   | PROTEIN I chaperone activity                           |
| CA3833 | 0.9 | 1.0  | 1.0 | IPF8192  | complemer unknown function               | orf19.6592  | 8192  | IPF8193   | Metabolism hydrolase activity                          |
| CA3834 | 1.1 | 1.0  | 1.0 | PLB3     | 12488494..phospholipase B (by h          | orf19.6594  | 8186  | IPF8192   | No significant S.c. match                              |
| CA3835 | 1.1 | 1.1  | 1.0 | RTA4     | 12492448..Protein involved in 7-ai       | orf19.6595  | 8181  | CaPLB3    | Lipid fatty-ε hydrolase activity                       |
| CA3836 | 1.0 | 1.0  | 1.0 | IPF8179  | 12494486..putative esterase (by h        | orf19.6596  | 8179  | CaRTA4    | UNCLASSIFIED PROTEINS                                  |
| CA3838 | 0.9 | 0.9  | 0.9 | LAS17    | complemer actin assembly factor (        | orf19.6598  | 12743 | IPF8179   | Lipid fatty-ε hydrolase activity                       |
| CA3839 | 1.0 | 1.0  | 1.0 | IPF12744 | 12499739..unknown function               |             | 12744 | CaLAS17   | CELL CYC protein binding                               |
| CA3840 | 0.8 | 0.5  | 1.0 | IPF12745 | 12501409..unknown function               | orf19.6600  | 12745 | IPF12744  | No significant S.c. match                              |
| CA3841 | 1.0 | 1.0  | 1.0 | IPF16640 | 12503398..unknown function               | orf19.6601  | 16640 | IPF12745  | CLASSIFIC molecular_function unknown                   |
| CA3842 | 2.5 | 3.5  | 1.9 | YKE2.3   | 12505413..Gim complex component          | 3-prime     | 7948  | IPF16640  | No significant S.c. match                              |
| CA3843 | 0.9 | 1.0  | 0.9 | IPF7947  | complemer unknown function               | orf19.6602  | 7947  | CaYKE2.3  | PROTEIN I protein binding                              |
| CA3844 | 1.2 | 1.7  | 1.1 | IPF7945  | 12508388..unknown function               | orf19.6604  | 7945  | IPF7947   | UNCLASSIMolecular_function unknown                     |
| CA3845 | 1.0 | 0.9  | 1.1 | IPF7944  | complemer unknown function               | orf19.6605  | 7944  | IPF7945   | No significant S.c. match                              |
| CA3846 | 0.9 | 1.0  | 0.9 | IPF7943  | 12510810..unknown function               | orf19.6606  | 7943  | IPF7944   | UNCLASSIMolecular_function unknown                     |
| CA3847 | 1.0 | 1.0  | 1.0 | IPF7942  | 12513243..NADH-ubiquinone oxid           | orf19.6607  | 7942  | IPF7943   | No significant S.c. match                              |
| CA3848 | 2.1 | 2.1  | 1.5 | IPF7940  | 12515029..unknown function               | orf19.6608  | 7940  | IPF7942   | No significant S.c. match                              |
| CA3849 | 1.0 | 1.0  | 1.0 | IPF7938  | 12517774..similar to Saccharomy          | orf19.6610  | 7938  | IPF7940   | No significant S.c. match                              |
| CA3850 | 1.0 | 1.0  | 1.0 | IPF7932  | 12520919..similar to Saccharomy          | orf19.6612  | 7932  | IPF7938   | SUBCELLI structural molecule activity                  |
| CA3851 | 1.0 | 1.0  | 1.0 | CTA21    | 12533211..transcriptional activati       | orf19.6112  | 10779 | IPF7932   | ENERGY ε molecular_function unknown                    |
| CA3852 | 1.2 | 1.2  | 1.0 | TUP1     | 12534656..general transcription r        | orf19.6109  | 4657  | CaCTA21   | No significant S.c. match                              |
| CA3853 | 0.9 | 1.1  | 0.9 | MVD1.3   | 12536361..mevalonate pyrophosp           | orf19.6105  | 4652  | CaTUP1    | TRANSCR transcription regulator activity               |
| CA3854 | 0.9 | 0.8  | 0.9 | IPF4649  | complemer unknown Function               | orf19.6102  | 4649  | CaMVD1.3  | Lipid fatty-ε lyase activity                           |
| CA3855 | 1.0 | 0.9  | 1.0 | IPF4645  | 12538088..unknown Function               | orf19.6103  | 4645  | IPF4649   | CELL CYC transcription regulator activity              |
| CA3856 | 1.0 | 1.0  | 1.0 | IPF4641  | complemer similar to Saccharomy          | orf19.6100  | 4641  | IPF4645   | UNCLASSIMolecular_function unknown                     |
| CA3857 | 0.9 | 1.2  | 1.0 | CCT8     | 12539831..component of chapero           | orf19.6099  | 4639  | IPF4641   | Lipid fatty-ε transferase activity                     |
| CA3858 | 0.9 | 0.9  | 1.0 | TRP1     | complemer phosphoribosylanthran          | orf19.6096  | 4635  | CaCCT8    | PROTEIN I chaperone activity                           |
| CA3859 | 1.0 | 1.0  | 1.0 | IPF4632  | complemer similar to Saccharomy          | orf19.6094  | 4632  | CaTRP1    | Amino acid isomerase activity                          |
| CA3860 | 0.9 | 1.0  | 1.0 | KEL1     | 12544763..involved in cell fusion        | εorf19.6092 | 4628  | IPF4632   | CELLULAF molecular_function unknown                    |
| CA3861 | 1.1 | 1.1  | 1.0 | RIM8     | complemer regulator of PH respon         | orf19.6091  | 4622  | CaKEL1    | REGULATI molecular_function unknown                    |
| CA3862 | 1.0 | 1.0  | 0.9 | NSR1     | complemer nuclear localization se        | orf19.6090  | 4616  | CaRIM8    | UNCLASSIFIED PROTEINS                                  |
| CA3863 | 0.9 | 1.0  | 1.0 | LEU41    | 12552360..2-isopropylmalalate sy         | orf19.6086  | 4611  | CaNSR1    | TRANSCR RNA binding                                    |

|        |     |     |     |            |                                               |             |                  |                                                                                                                      |
|--------|-----|-----|-----|------------|-----------------------------------------------|-------------|------------------|----------------------------------------------------------------------------------------------------------------------|
| CA3864 | 1.3 | 2.2 | 1.5 | RPL16A     | 12554335..ribosomal protein (by h             | orf19.6085  | 4609 CaLEU41     | Amino acid transferase activity                                                                                      |
| CA3865 | 1.0 | 1.0 | 0.9 | IPF4608    | complemer unknown Function                    | orf19.6084  | 4608 CaRPL16A    | PROTEIN :RNA binding                                                                                                 |
| CA3866 | 1.1 | 1.2 | 1.1 | IPF4606    | complemer unknown Function                    | orf19.6082  | 4606 IPF4608     | No significant S. c. match                                                                                           |
| CA3867 | 1.1 | 1.2 | 1.1 | PHR2       | 12560345..pH-regulated protein 2              | orf19.1350  | 4604 IPF4606     | C-compour molecular_function unknown                                                                                 |
| CA3868 | 1.1 | 1.2 | 1.0 | CCT1       | complemer component of chaperone              | orf19.401   | 8832 CaPHR2      | Lipid fatty-:transferase activity                                                                                    |
| CA3869 | 1.1 | 2.1 | 1.1 | IPF8831    | 12568747..unknown function                    | orf19.400   | 8831 CaCCT1      | PROTEIN I chaperone activity                                                                                         |
| CA3870 | 1.4 | 1.5 | 1.1 | YPK1       | 12570292..ser/thr-specific protein            | orf19.399   | 8830 IPF8831     | No significant S. c. match                                                                                           |
| CA3871 | 1.0 | 1.0 | 1.1 | IPF8828    | complemer unknown function                    | orf19.398   | 8828 CaYPK1      | CELL CYC protein kinase activity                                                                                     |
| CA3872 | 1.1 | 1.0 | 0.9 | MRPL28     | 12573281..mitochondrial ribosomal             | orf19.397   | 8826 IPF8828     | No significant S. c. match                                                                                           |
| CA3873 | 1.1 | 1.1 | 1.0 | IPF8825    | complemer unknown function                    | orf19.396   | 8825 CaMRPL28    | PROTEIN I structural molecule activity                                                                               |
| CA3874 | 4.6 | 4.0 | 2.6 | ENO1       | 12575400..Enolase 1 (2-phosphog               | orf19.395   | 14429 IPF8825    | UNCLASSI molecular_function unknown                                                                                  |
| CA3875 | 1.2 | 1.0 | 1.0 | IPF14430   | complemer putative kynureninase               | orf19.8024  | 14430 CaENO1     | C-compour lyase activity                                                                                             |
| CA3876 | 1.1 | 1.0 | 1.1 | APS3       | 12578650..AP-3 complex subunit,               | orf19.8023  | 7291 IPF14430    | Amino acid hydrolase activity                                                                                        |
| CA3877 | 1.1 | 1.1 | 1.1 | CBP4       | complemer Ubiquinol--cytochrome               | orf19.392   | 7290 CaAPS3      | CELLULAF molecular_function unknown                                                                                  |
| CA3878 | 1.0 | 0.9 | 1.0 | IPF7289    | 12580573..similar to Saccharomy               | orf19.391   | 7289 CaCBP4      | ENERGY " molecular_function unknown                                                                                  |
| CA3879 | 1.2 | 1.1 | 1.2 | CDC42      | 12583487..Cell Division Control               | orf19.390   | 7286 IPF7289     | Lipid fatty-:transcription regulator activity                                                                        |
| CA3880 | 1.1 | 1.2 | 1.1 | CAF16      | complemer ABC ATPase (by homc                 | orf19.388   | 7283 CaCDC42     | CELL CYC signal transducer activity                                                                                  |
| CA3881 | 0.8 | 0.8 | 1.0 | GCR3       | complemer Large subunit of the nu             | orf19.387   | 7281 CaCAF16     | TRANSCR transporter activity,hydrolase activity                                                                      |
| CA3882 | 1.1 | 1.3 | 1.1 | IPF7279    | 12589543..putative cobalamin-dep              | orf19.386   | 7279 CaGCR3      | TRANSCR RNA binding                                                                                                  |
| CA3883 | 1.0 | 1.1 | 1.0 | GCV2       | 12591452..Glycine decarboxylase               | orf19.8015  | 19789 IPF7279    | UNCLASSI transferase activity                                                                                        |
| CA3884 | 0.9 | 0.8 | 1.0 | IPF6367    | 12595057..unknown function                    | orf19.8014  | 6367 CaGCV2      | Amino acid oxidoreductase activity                                                                                   |
| CA3885 | 1.2 | 1.0 | 1.0 | IPF19790   | 12598744..unknown function                    | orf19.5095  | 19790 IPF6367    | UNCLASSI molecular_function unknown                                                                                  |
| CA3886 | 1.0 | 1.0 | 1.0 | IPF12963   | 12605161..ubiquitin-mediated prol             | orf19.5094  | 12963 IPF19790   | Lipid fatty-acid and isoprenoid metabolism                                                                           |
| CA3887 | 0.9 | 1.0 | 1.0 | IPF12964   | complemer similar to Saccharomy               | orf19.5093  | 12964 IPF12963   | PROTEIN FATE [folding modification destination]                                                                      |
| CA3888 | 1.0 | 0.9 | 1.0 | IPF12967   | 12608994..unknown function                    | orf19.5092  | 12967 IPF12964   | CELL CYC protein binding                                                                                             |
| CA3889 | 1.0 | 0.9 | 1.0 | TAD3       | complemer tRNA-specific adenosin              | orf19.5090  | 12969 IPF12967   | No significant S. c. match                                                                                           |
| CA3890 | 0.9 | 0.9 | 1.1 | TERT2      | 12610665..telomerase reverse tra              | orf19.5089  | 19791 CaTAD3     | TRANSCR hydrolase activity                                                                                           |
| CA3891 | 1.0 | 1.0 | 0.9 | BUD6       | complemer bud site selection prote            | orf19.5087  | 8707 CaTERT2     | CELL CYC DNA binding,nucleotidyltransferase activity                                                                 |
| CA3892 | 1.0 | 1.1 | 1.0 | PSE1       | complemer karyopherin-beta prote              | orf19.5085  | 8712 CaBUD6      | CELL FATI protein binding                                                                                            |
| CA3893 | 0.9 | 0.9 | 0.9 | FUN11      | complemer putative GTP-binding f              | orf19.5083  | 8715 CaPSE1      | CELLULAF protein binding                                                                                             |
| CA3894 | 1.0 | 1.0 | 1.0 | YIF2       | 12621274..general translation fact            | orf19.5081  | 8722 CaFUN11     | UNCLASSI molecular_function unknown                                                                                  |
| CA3895 | 1.1 | 1.3 | 1.2 | CDR4       | complemer Multidrug resistance pr             | orf19.5079  | 10349 CaYIF2     | PROTEIN I translation regulator activity                                                                             |
| CA3896 | 0.9 | 0.8 | 0.8 | IPF10339   | complemer unknown function                    | orf19.5077  | 10339 CaCDR4     | Lipid fatty-acid and isoprenoid metabolism """"CELL RESCUE DEFENSE AND VIRULENCE ""REGULATION OF/INTERACTION WITH CE |
| CA3897 | 1.9 | 1.7 | 1.2 | PFY1       | complemer BINDS TO ACTIN                      | orf19.5076  | 16724 IPF10339   | No significant S. c. match                                                                                           |
| CA3898 | 1.1 | 1.0 | 1.0 | UBA2       | complemer ubiquitin-activating -lik           | orf19.5074  | 10088 CaPFY1     | CELL FATI protein binding                                                                                            |
| CA3899 | 1.0 | 1.0 | 1.0 | DPM1       | complemer dolichol-phosphate (be              | orf19.5073  | 10089 CaUBA2     | TRANSCRIPTION ""PROTEIN FATE [folding modification destination] ""SUBCELLULAR LOCALISATION                           |
| CA3900 | 0.9 | 1.2 | 0.8 | IPF10092   | complemer unknown function                    | orf19.5071  | 10092 CaDPM1     | C-compour transferase activity                                                                                       |
| CA3901 | 1.1 | 1.0 | 1.0 | IPF3282.3f | 12643207..hexose transporter, 3-prime end (t  | orf19.4401  | 14892 IPF10092   | UNCLASSI molecular_function unknown                                                                                  |
| CA3902 | 1.0 | 1.0 | 1.0 | YVH1       | 12643889..protein tyrosine phospl             | orf19.4401  | 14891 IPF3282.3c | C-compound and carbohydrate metabolism CELLULAR TRANSPORT AND TRANSPORT MECHANISMS SUBCELLULAR LOCALISATIO           |
| CA3903 | 0.9 | 1.0 | 1.0 | IPF14890   | complemer unknown function                    | orf19.4400  | 14890 CaYVH1     | CELL CYC protein phosphatase activity                                                                                |
| CA3904 | 1.1 | 1.0 | 0.9 | IPF14888   | complemer unknown function                    | orf19.1187  | 14888 IPF14890   | No significant S. c. match                                                                                           |
| CA3905 | 0.9 | 1.0 | 1.0 | IPF19792   | complemer unknown function                    | orf19.1187i | 19792 IPF14888   | PROTEIN I molecular_function unknown                                                                                 |
| CA3906 | 1.1 | 1.1 | 1.0 | IPF20149   | complemer unknown function                    | orf19.1187. | 20149 IPF19792   | UNCLASSI molecular_function unknown                                                                                  |
| CA3907 | 1.0 | 1.0 | 1.0 | IPF3304    | 12651099..similar to Saccharomy               | orf19.1187. | 3304 IPF20149    | ENERGY molecular_function unknown                                                                                    |
| CA3908 | 1.0 | 1.0 | 0.9 | IPF3301    | complemer unknown function                    | orf19.4394  | 3301 IPF3304     | SUBCELL protein binding                                                                                              |
| CA3909 | 0.3 | 0.9 | 0.1 | CIT1.EXO   | complemer Citrate synthase, exon              | orf19.4393  | 3299 IPF3301     | C-compound and carbohydrate metabolism ""PROTEIN FATE [folding modification destination] ""                          |
| CA3910 | 1.1 | 0.9 | 1.0 | IPF3293    | complemer unknown function                    | orf19.4392  | 3293 CaCIT1.ex   | C-compour transferase activity                                                                                       |
| CA3911 | 0.9 | 1.0 | 0.9 | IPF3292    | complemer unknown function                    | orf19.4391  | 3292 IPF3293     | UNCLASSI molecular_function unknown                                                                                  |
| CA3912 | 1.0 | 0.9 | 1.0 | IPF3288    | complemer unknown function                    | orf19.4390  | 3288 IPF3292     | UNCLASSIFIED PROTEINS                                                                                                |
| CA3913 | 0.9 | 1.0 | 1.0 | IPF3283    | complemer unknown function                    | orf19.4388  | 3283 IPF3288     | No significant S. c. match                                                                                           |
| CA3914 | 1.1 | 1.0 | 0.9 | IPF3282    | complemer hexose transporter (by              | orf19.4386  | 3282 IPF3283     | TRANSCR transcription regulator activity                                                                             |
| CA3915 | 1.0 | 1.0 | 1.0 | IPF3277    | complemer unknown function                    | orf19.4384  | 3277 IPF3282     | C-compound and carbohydrate metabolism CELLULAR TRANSPORT AND TRANSPORT MECHANISMS SUBCELLULAR LOCALISATIO           |
| CA3916 | 0.9 | 0.8 | 0.9 | IPF3274    | complemer Unknown function                    | orf19.4383  | 3274 IPF3277     | No significant S. c. match                                                                                           |
| CA3917 | 1.1 | 1.1 | 1.2 | IPF3273    | complemer similar to Saccharomy               | orf19.4382  | 3273 IPF3274     | UNCLASSI molecular_function unknown                                                                                  |
| CA3918 | 1.0 | 0.9 | 1.0 | VTC2       | complemer putative polyphosphate              | orf19.4381  | 3271 IPF3273     | CELLULAF protein binding                                                                                             |
| CA3919 | 0.9 | 1.0 | 1.0 | IFC5       | complemer unknown function                    | orf19.5121  | 9728 CaVTC2      | Phosphate molecular_function unknown                                                                                 |
| CA3920 | 1.1 | 1.0 | 1.0 | SDS24      | complemer Similar to S. cerevisiae            | orf19.5118  | 6359 CaIFC5      | TRANSPORT FACILITATION                                                                                               |
| CA3921 | 1.5 | 2.8 | 1.9 | OLE1       | 12697174..Stearoyl-CoA desatura               | orf19.5117  | 6353 CaSDS24     | PROTEIN I molecular_function unknown                                                                                 |
| CA3922 | 0.9 | 0.9 | 1.0 | GRD19      | 12700546..Probable golgi membr                | orf19.5114  | 6349 CaOLE1      | Lipid fatty-:oxidoreductase activity                                                                                 |
| CA3923 | 0.6 | 1.4 | 0.5 | ADH2       | 12702654..alcohol dehydrogenas                | orf19.5113  | 16784 CaGRD19    | PROTEIN I protein binding                                                                                            |
| CA3924 | 1.0 | 1.1 | 1.5 | TKL1       | complemer transketolase 1                     | orf19.5112  | 13260 CaADH2     | C-compour oxidoreductase activity                                                                                    |
| CA3925 | 0.9 | 1.0 | 0.9 | IPF13257   | complemer unknown function                    | orf19.5110  | 13257 CaTKL1     | Amino acid transferase activity                                                                                      |
| CA3926 | 1.0 | 1.0 | 0.9 | IPF16198   | complemer possible regulatory pro             | orf19.5107  | 16198 IPF13257   | No significant S. c. match                                                                                           |
| CA3927 | 0.9 | 0.9 | 0.9 | DIP2       | 12713649..beta transducin                     | orf19.5106  | 14262 IPF16198   | TRANSCR RNA binding                                                                                                  |
| CA3928 | 0.6 | 0.5 | 0.8 | GAL11      | 12719361..DNA-directed RNA pol                | orf19.5105  | 12729 CaDIP2     | CELL CYC RNA binding                                                                                                 |
| CA3930 | 0.9 | 1.0 | 1.0 | LPT1.EXO   | 12723309..protein-tyrosine-phosp              | orf19.5104  | 12722 CaGAL11    | C-compour transcription regulator activity                                                                           |
| CA3931 | 0.9 | 0.9 | 0.8 | IPF12719   | 12725059..unknown function                    | orf19.5103  | 12719 CaLPT1.ex  | CLASSIFIC protein phosphatase activity                                                                               |
| CA3932 | 0.9 | 0.9 | 1.0 | IPF20150   | complemer unknown function                    | orf19.9561  | 20150 IPF12719   | ENERGY                                                                                                               |
| CA3933 | 0.9 | 0.8 | 0.9 | IPF18281   | 12730007..similar to Saccharomy               | orf19.9560  | 18281 IPF20150   | No significant S. c. match                                                                                           |
| CA3934 | 1.0 | 1.0 | 0.9 | IPF17119   | 12731697..unknown function                    | orf19.2008  | 17119 IPF18281   | SUBCELL protein binding                                                                                              |
| CA3935 | 1.1 | 1.0 | 1.1 | IPF14688   | complemer unknown function                    | orf19.2007  | 14688 IPF17119   | UNCLASSI molecular_function unknown                                                                                  |
| CA3936 | 1.0 | 1.0 | 1.1 | COX17      | 12736721..cysteine-rich cytoplasmic protein(t | orf19.2007  | 14687 IPF14688   | CELLULAF molecular_function unknown                                                                                  |

|        |     |     |     |            |                                   |               |                  |                                                                                                             |
|--------|-----|-----|-----|------------|-----------------------------------|---------------|------------------|-------------------------------------------------------------------------------------------------------------|
| CA3937 | 1.0 | 1.1 | 1.1 | IPF14686   | complemer unknown function        | orf19.9557    | 14686 CaCOX17    | ENERGY " transporter activity                                                                               |
| CA3938 | 0.5 | 0.5 | 0.4 | IPF4764    | complemer unknown Function        | orf19.9556    | 4764 IPF14686    | UNCLASSI molecular_function unknown                                                                         |
| CA3939 | 1.0 | 1.0 | 1.0 | HNM1       | complemer Choline permease (by    | orf19.9554    | 4757 IPF4764     | C-compour protein phosphatase activity                                                                      |
| CA3940 | 0.9 | 0.9 | 0.8 | NIC96      | 12748259..nuclear pore protein (b | orf19.9553    | 4755 CaHNM1      | CELLULAR TRANSPORT AND TRANSPORT MECHANISMS SUBCELLULAR LOCALISATION TRANSPORT FACILITATION                 |
| CA3941 | 0.9 | 1.0 | 0.9 | IPF4754    | 12751373..unknown Function        | orf19.2001    | 4754 CaNIC96     | CELLULAF structural molecule activity                                                                       |
| CA3942 | 0.9 | 0.9 | 0.9 | CHL1       | complemer protein of the DEAH bc  | orf19.2000    | 4753 IPF4754     | No significant S.c. match                                                                                   |
| CA3943 | 0.9 | 1.0 | 1.0 | IPF4751    | 12754865..unknown Function        | orf19.1999    | 4751 CaCHL1      | CELL CYC DNA binding,helicase activity                                                                      |
| CA3944 | 1.0 | 0.8 | 0.9 | IPF4750    | 12755828..unknown Function        | orf19.1998    | 4750 IPF4750     | No significant S.c. match                                                                                   |
| CA3945 | 1.0 | 1.0 | 1.0 | CHA12      | 12758897..L-serine/L-threonine de | orf19.9548    | 4749 IPF4750     | CELL CYCLE AND DNA PROCESSING                                                                               |
| CA3946 | 1.0 | 1.0 | 1.0 | MNN2       | complemer Golgi alpha-1,2-mann    | orf19.9547    | 4742 CaCHA12     | Amino acid metabolism                                                                                       |
| CA3947 | 1.0 | 1.0 | 1.0 | IPF14768   | 12766735..unknown function        | orf19.1994    | 14768 CaMNN2     | CELL FATE                                                                                                   |
| CA3948 | 1.1 | 1.0 | 1.1 | RPN9       | 12769144..26S proteasome reguli   | orf19.1993    | 14766 IPF14768   | UNCLASSIFIED PROTEINS                                                                                       |
| CA3949 | 0.9 | 1.0 | 1.0 | SIR21      | complemer regulatory protein (by  | orf19.9544    | 17303 CaRPN9     | PROTEIN Ipeptidase activity                                                                                 |
| CA3950 | 1.0 | 0.9 | 1.0 | PTM1       | 12773621..Possibly involved in th | orf19.9542    | 19793 CaSIR21    | TRANSCRIPTION CELL FATE                                                                                     |
| CA3951 | 1.1 | 0.9 | 0.9 | VAC7.3     | 12796222..Vacuolar protein, 3-pri | orf19.1409    | 6717 CaPTM1      | ENERGY molecular_function unknown                                                                           |
| CA3952 | 1.1 | 1.0 | 1.0 | IPF6716    | complemer Phenylacetate 2-hydro   | orf19.1411    | 6716 CaVAC7.3    | PROTEIN Ienzyme regulator activity                                                                          |
| CA3953 | 0.9 | 0.9 | 0.9 | IPF6714    | complement(12800838..12801470     | orf19.1412    | 6714 IPF6716     | Lipid fatty-acid and isoprenoid metabolism """"CELL RESCUE DEFENSE AND VIRULENCE ""SUBCELLULAR LOCALISATION |
| CA3954 | 0.9 | 1.0 | 1.1 | YFH1       | 12801702..Regulates mitochondri   | orf19.1413    | 6713 IPF6714     | No significant S.c. match                                                                                   |
| CA3955 | 1.2 | 1.3 | 1.2 | IPF6712.5f | 12802958..unknown function, 5-pr  | orf19.1414    | 6712 CaYFH1      | REGULATIenzyme regulator activity                                                                           |
| CA3956 | 1.1 | 0.9 | 1.1 | IPF6712.3f | 12803598..unknown function, 3-pr  | ime end       | 6710 IPF6712.5f  | UNCLASSIFIED PROTEINS                                                                                       |
| CA3957 | 1.3 | 1.3 | 1.5 | RBT2       | complemer Repressed by TUP1 pr    | orf19.1415    | 6709 IPF6712.3f  | No significant S.c. match                                                                                   |
| CA3958 | 0.9 | 1.0 | 1.0 | COX11      | complemer cytochrome-c oxidase    | orf19.1416    | 11240 CaRBT2     | REGULATION OF/INTERACTION WITH CELLULAR ENVIRONMENT Other virulence attributes                              |
| CA3959 | 1.1 | 0.9 | 1.0 | IPF11236.f | complemer similar to Saccharomy   | orf19.1418    | 11238 CaCOX11    | Metabolism molecular_function unknown                                                                       |
| CA3960 | 1.0 | 0.9 | 1.0 | IPF11236.f | complemer similar to Saccharomy   | orf19.1419    | 11236 IPF11236.f | CELLULAR TRANSPORT AND TRANSPORT MECHANISMS SUBCELLULAR LOCALISATION                                        |
| CA3961 | 0.9 | 0.9 | 1.0 | IPF11235   | 12814339..unknown function        | orf19.1420    | 11235 IPF11236.f | CELLULAF protein binding                                                                                    |
| CA3962 | 0.9 | 1.0 | 0.9 | IPF11234   | complemer similar to saccharomy   | orf19.1421    | 11234 IPF11235   | UNCLASSI molecular_function unknown                                                                         |
| CA3963 | 1.0 | 1.1 | 1.0 | IPF11233   | 12816247..similar to Saccharomy   | orf19.1422    | 11233 IPF11234   | Nitrogen ar hydrolase activity                                                                              |
| CA3964 | 1.1 | 1.0 | 1.1 | IPF9370    | complemer unknown function        | orf19.1424    | 9370 IPF11233    | CONTROL hydrolase activity                                                                                  |
| CA3965 | 1.2 | 1.3 | 1.2 | IPF9375    | 12822546..unknown function        | orf19.1426    | 9375 IPF9370     | UNCLASSI molecular_function unknown                                                                         |
| CA3966 | 1.0 | 1.0 | 1.0 | IPF9376    | complemer unknown function        | orf19.1427    | 9376 IPF9375     | UNCLASSIFIED PROTEINS                                                                                       |
| CA3967 | 0.9 | 1.0 | 1.0 | IPF9377    | complemer unknown function        | orf19.1428    | 9377 IPF9376     | TRANSPO transporter activity                                                                                |
| CA3968 | 1.0 | 1.0 | 1.1 | IPF9378    | 12827859..similar to Saccharomy   | orf19.1429    | 9378 IPF9377     | No significant S.c. match                                                                                   |
| CA3969 | 1.0 | 1.0 | 1.0 | IPF9379    | 12829925..unknown function        | orf19.1430    | 9379 IPF9378     | CELL CYC molecular_function unknown                                                                         |
| CA3970 | 1.1 | 1.0 | 1.0 | IPF6497    | complemer unknown function        | orf19.1542    | 6497 IPF9379     | No significant S.c. match                                                                                   |
| CA3971 | 1.1 | 1.1 | 1.1 | IPF6498    | complemer unknown function        | orf19.1543    | 6498 IPF6497     | C-compour DNA binding                                                                                       |
| CA3972 | 1.1 | 1.0 | 1.1 | IPF6504    | 12839665..unknown function        | orf19.9118    | 6504 IPF6498     | No significant S.c. match                                                                                   |
| CA3973 | 1.0 | 1.0 | 1.0 | IPF6505    | complemer unknown function        | orf19.1545    | 6505 IPF6504     | UNCLASSI molecular_function unknown                                                                         |
| CA3974 | 0.9 | 0.9 | 1.0 | IPF6507    | 12841350..unknown function        | orf19.1546    | 6507 IPF6505     | UNCLASSI molecular_function unknown                                                                         |
| CA3975 | 1.0 | 1.0 | 1.0 | IPF20152   | complemer unknown function        | orf19.1547    | 20152 IPF6507    | UNCLASSI molecular_function unknown                                                                         |
| CA3976 | 0.9 | 0.9 | 0.9 | SNU23      | 12843206..RNA binding zinc finge  | orf19.1548    | 15310 IPF20152   | UNCLASSI molecular_function unknown                                                                         |
| CA3977 | 1.0 | 0.9 | 1.0 | IPF20153   | 12844359..unknown function        | orf19.1549    | 20153 CaSNU23    | TRANSCR RNA binding                                                                                         |
| CA3978 | 1.2 | 1.1 | 1.1 | CPR3       | complemer cyclophilin (peptidylpr | orf19.1552    | 20154 IPF20153   | No significant S.c. match                                                                                   |
| CA3979 | 1.2 | 1.3 | 1.1 | ENT3.3F    | complemer putative endocytosis ai | orf19.1553    | 7127 CaCPR3      | PROTEIN IFAE [folding modification destination] ""SUBCELLULAR LOCALISATION                                  |
| CA3982 | 1.0 | 1.0 | 1.0 | SAC3       | complemer Leucine permease trar   | orf19.9129    | 7130 CaENT3.3f   | SUBCELLL protein binding                                                                                    |
| CA3983 | 1.0 | 0.9 | 0.9 | IPF7133.3  | complemer unknown function, 3-pr  | orf19.9130    | 7133 CaSAC3      | Amino acid protein binding                                                                                  |
| CA3984 | 1.2 | 1.2 | 1.1 | HOM2       | complemer Aspartate-semialdehyc   | orf19.9132    | 7136 IPF7133.3   | UNCLASSI molecular_function unknown                                                                         |
| CA3985 | 1.1 | 1.0 | 1.0 | POB3       | 12855324..Binds DNA polymerase    | orf19.1560    | 7138 CaHOM2      | Amino acid oxidoreductase activity                                                                          |
| CA3986 | 1.5 | 1.6 | 1.2 | IPF7141    | 12858766..unknown function        | orf19.1562    | 7141 CaPOB3      | CELL CYC DNA binding                                                                                        |
| CA3987 | 1.0 | 1.0 | 1.0 | ECM3       | 12860734..Involved in cell wall   | bicorf19.1563 | 7144 IPF7141     | No significant S.c. match                                                                                   |
| CA3988 | 2.8 | 1.6 | 1.4 | IPF7145    | 12862774..unknown function        | orf19.1564    | 7145 CaECM3      | CONTROL hydrolase activity                                                                                  |
| CA3989 | 1.0 | 1.1 | 1.0 | IPF7147    | complemer unknown function        | orf19.1565    | 7147 IPF7145     | UNCLASSI molecular_function unknown                                                                         |
| CA3990 | 0.9 | 1.0 | 0.9 | IPF14782   | 12865488..beta-transducin (by ho  | orf19.1566    | 14782 IPF7147    | UNCLASSIFIED PROTEINS                                                                                       |
| CA3991 | 0.9 | 0.9 | 1.0 | VAM6.5F    | 12868640..Vacuolar carboxypepti   | orf19.1567    | 14783 IPF14782   | CLASSIFIC molecular_function unknown                                                                        |
| CA3992 | 1.0 | 1.1 | 1.0 | VAM6.3F    | 12870299..Vacuolar carboxypepti   | orf19.1568    | 19794 CaVAM6.5   | No significant S.c. match                                                                                   |
| CA3993 | 0.9 | 1.0 | 1.0 | IPF8275    | complemer unknown function        | orf19.9142    | 8275 CaVAM6.3    | PROTEIN Ienzyme regulator activity                                                                          |
| CA3994 | 0.9 | 1.0 | 0.9 | ERG7       | 12875947..lanosterol synthase     | orf19.9143    | 8270 IPF8275     | UNCLASSI molecular_function unknown                                                                         |
| CA3995 | 0.9 | 0.9 | 0.9 | IPF11615.f | 12879487..RNA-binding protein (by | homology      | 10438 CaERG7     | Lipid fatty-ε isomerase activity                                                                            |
| CA3996 | 0.9 | 0.6 | 1.1 | IPF10440   | 12879925..unknown function        | orf19.1643    | 10440 IPF11615.f | CLASSIFICATION NOT YET CLEAR-CUT                                                                            |
| CA3997 | 1.0 | 1.0 | 1.0 | LOC1       | complemer putative double-strandi | orf19.1642    | 10442 IPF10440   | UNCLASSIpeptidase activity                                                                                  |
| CA3998 | 1.0 | 1.0 | 1.0 | IPF10443   | 12882405..formamidase-like prote  | orf19.1641    | 10443 CaLOC1     | UNCLASSIRNA binding                                                                                         |
| CA3999 | 1.0 | 1.1 | 1.1 | IPF10447   | complemer unknown function        | orf19.1637    | 10447 IPF10443   | No significant S.c. match                                                                                   |
| CA4000 | 1.1 | 1.0 | 1.1 | IPF4262    | 12890326..similar to Saccharomy   | orf19.1636    | 4262 IPF10447    | No significant S.c. match                                                                                   |
| CA4001 | 2.4 | 1.4 | 1.8 | RPL12      | 12892036..ribosomal protein       | orf19.1635    | 4260 IPF4262     | REGULATIenzyme regulator activity                                                                           |
| CA4002 | 1.0 | 1.0 | 1.0 | IPF4258    | 12893635..unknown function        | orf19.1634    | 4258 CaRPL12     | PROTEIN I structural molecule activity                                                                      |
| CA4003 | 1.0 | 1.0 | 1.0 | IPF4257    | 12895133..unknown function        | orf19.1633    | 4257 IPF4258     | Lipid fatty-acid and isoprenoid metabolism                                                                  |
| CA4004 | 0.9 | 0.9 | 1.2 | IPF4256    | complemer unknown function        | orf19.1632    | 4256 IPF4257     | UNCLASSIRNA binding                                                                                         |
| CA4005 | 1.0 | 0.9 | 1.0 | ERG6       | complemer sterol transmethylase   | orf19.1631    | 4255 IPF4256     | UNCLASSIFIED PROTEINS                                                                                       |
| CA4006 | 1.0 | 1.0 | 1.0 | IPF4253    | complemer unknown function        | orf19.1630    | 4253 CaERG6      | Lipid fatty-ε transferase activity                                                                          |
| CA4007 | 1.0 | 1.2 | 1.1 | LAP41      | complemer aminopeptidase yscl p   | orf19.1628    | 4250 IPF4253     | TRANSCR molecular_function unknown                                                                          |
| CA4008 | 1.0 | 1.0 | 1.0 | DYS1       | complemer deoxyhypusine syntha    | orf19.1626    | 4248 CaLAP41     | PROTEIN Ipeptidase activity                                                                                 |
| CA4009 | 1.0 | 1.0 | 1.0 | IPF4247    | complemer unknown function        | orf19.1625    | 4247 CaDYS1      | Amino acid transferase activity                                                                             |
| CA4010 | 1.0 | 0.9 | 1.0 | MAK10.3    | complemer glucose-repressible pr  | orf19.1624    | 4245 IPF4247     | No significant S.c. match                                                                                   |

|        |     |     |     |            |                                      |             |                  |                                                                                                        |
|--------|-----|-----|-----|------------|--------------------------------------|-------------|------------------|--------------------------------------------------------------------------------------------------------|
| CA4011 | 1.0 | 1.0 | 1.0 | IPF4240    | complemer similar to Saccharomy      | orf19.1622  | 4240 CaMAK10.    | ENERGY transferase activity                                                                            |
| CA4012 | 1.1 | 1.0 | 1.0 | GPA2       | complemer nucleotide-binding regior  | orf19.1621  | 4239 IPF4240     | CELL CYC molecular_function unknown                                                                    |
| CA4013 | 1.0 | 1.0 | 1.1 | IPF4234    | complemer unknown function           | orf19.1620  | 4234 CaGPA2      | CELLULAF hydrolase activity                                                                            |
| CA4014 | 1.0 | 1.0 | 1.0 | CTK1       | complemer probable cell division por | orf19.1619  | 4233 IPF4234     | No significant S.c. match                                                                              |
| CA4015 | 1.0 | 1.3 | 1.1 | IPF12268   | 12926743..unknown function           |             | 12268 CaCTK1     | TRANSCR protein kinase activity                                                                        |
| CA4016 | 1.1 | 1.3 | 1.3 | GFA1       | complemer glutamine:fructose-6-p     | orf19.1618  | 12267 IPF12268   | No significant S.c. match                                                                              |
| CA4017 | 0.9 | 1.1 | 1.0 | PBN1       | 12937376..protease by homology       | orf19.3447  | 5328 CaGFA1      | C-compour transferase activity                                                                         |
| CA4018 | 1.0 | 1.0 | 1.0 | MOG1       | complemer Ran-Binding Protein by     | orf19.3446  | 5327 CaPBN1      | PROTEIN I molecular_function unknown                                                                   |
| CA4019 | 0.9 | 1.1 | 1.0 | HOC1       | 12939834..GLYCOSYLTRANSFE            | orf19.3445  | 5326 CaMOG1      | PROTEIN I protein binding                                                                              |
| CA4020 | 1.0 | 1.0 | 1.1 | IPF5324    | 12942128..putative transporter (b    | orf19.3444  | 5324 CaHOC1      | C-compour transferase activity                                                                         |
| CA4021 | 1.0 | 1.1 | 1.0 | EBP2       | complemer NADPH dehydrogenas         | orf19.3442  | 5322 IPF5324     | CELL RESCUE DEFENSE AND VIRULENCE ""TRANSPORT FACILITATION                                             |
| CA4022 | 1.1 | 1.0 | 1.0 | FRP6       | complemer member of the FRP far      | orf19.3441  | 5321 CaEBP2      | ENERGY                                                                                                 |
| CA4023 | 1.1 | 1.1 | 1.1 | FRP5       | complemer member of the FRP far      | orf19.3440  | 7185 CaFRP6      | C-compound and carbohydrate metabolism                                                                 |
| CA4024 | 0.9 | 0.9 | 1.0 | IPF7182    | complemer unknown function           | orf19.3439  | 7182 CaFRP5      | C-compound and carbohydrate metabolism                                                                 |
| CA4025 | 1.1 | 1.0 | 1.0 | SCJ1       | complemer Mitochondrial and ER i     | orf19.3438  | 7178 IPF7182     | No significant S.c. match                                                                              |
| CA4026 | 0.9 | 0.9 | 0.9 | IPF7175    | 12957963..unknown function           | orf19.3437  | 7175 CaSCJ1      | PROTEIN I chaperone activity                                                                           |
| CA4027 | 1.0 | 1.0 | 0.9 | IPF7174    | 12960250..unknown function           | orf19.3436  | 7174 IPF7175     | No significant S.c. match                                                                              |
| CA4028 | 1.0 | 1.0 | 1.0 | IPF7171.3f | complemer unknown function, 3-pr     | orf19.3435  | 7173 IPF7174     | CELL FATE SUBCELLULAR LOCALISATION PROTEIN ACTIVITY REGULATION                                         |
| CA4029 | 1.1 | 0.9 | 1.0 | IPF7171.5f | complemer unknown function, 5-pr     | orf19.3434  | 7171 IPF7171.3f  | No significant S.c. match                                                                              |
| CA4030 | 0.9 | 0.9 | 0.9 | EBP4       | 12968102..NADPH dehydrogenas         | orf19.3433  | 19548 IPF7171.5f | TRANSCR molecular_function unknown                                                                     |
| CA4031 | 0.9 | 1.0 | 0.9 | IPF11077   | 12970024..membrane transporter       | orf19.3432  | 11077 CaEBP4     | ENERGY transporter activity                                                                            |
| CA4032 | 1.1 | 0.9 | 1.0 | IPF11081   | 12975776..unknown function           |             | 11081 IPF11077   | CELL RESCUE DEFENSE AND VIRULENCE ""TRANSPORT FACILITATION                                             |
| CA4033 | 0.9 | 0.9 | 1.0 | IPF19795   | complemer similar to Saccharomy      | orf19.3431  | 19795 IPF11081   | No significant S.c. match                                                                              |
| CA4034 | 1.0 | 1.0 | 0.9 | HSP31      | 12983964..heat shock protein (by     | orf19.11141 | 12039 IPF19795   | CELL CYC nucleotidyltransferase activity                                                               |
| CA4035 | 1.0 | 1.0 | 1.0 | IPF12040   | 12985492..unknown function           | orf19.3665  | 12040 CaHSP31    | CELL RESCUE DEFENSE AND VIRULENCE ""REGULATION OF/INTERACTION WITH CELLULAR ENVIRONMENT SUBCELLULAR LC |
| CA4036 | 1.0 | 1.0 | 1.0 | IPF12042   | complemer unknown function           | orf19.3666  | 12042 IPF12040   | UNCLASSI molecular_function unknown                                                                    |
| CA4037 | 1.0 | 1.1 | 1.1 | KIP31      | 12988346..kinesin-related protein    | orf19.3667  | 12044 IPF12042   | UNCLASSI molecular_function unknown                                                                    |
| CA4038 | 1.1 | 1.2 | 1.0 | HGT12      | complemer hexose transporter         | orf19.3668  | 5315 CaKIP31     | CELL CYCLE AND DNA PROCESSING CELLULAR TRANSPORT AND TRANSPORT MECHANISMS SUBCELLULAR LOCALISATION     |
| CA4039 | 1.0 | 1.0 | 1.0 | SKS1       | complemer serine/threonine kinas     | orf19.3669  | 5304 CaHGT12     | C-compound and carbohydrate metabolism TRANSPORT FACILITATION                                          |
| CA4040 | 1.0 | 1.0 | 1.0 | GAL1       | complemer galactokinase              | orf19.3670  | 5296 CaSKS1      | C-compour protein kinase activity                                                                      |
| CA4041 | 1.0 | 1.0 | 1.0 | GAL10      | 13008284..UDP-glucose 4-epimer       | orf19.3672  | 5294 CaGAL1      | C-compour protein binding                                                                              |
| CA4042 | 0.9 | 0.8 | 0.9 | TRS23      | 13010516..targeting and fusion of    | orf19.3673  | 5292 CaGAL10     | C-compour molecular_function unknown                                                                   |
| CA4043 | 0.9 | 0.9 | 0.9 | IPF5291    | complemer UDP-glucose 4-epimer       | orf19.3674  | 5291 CaTRS23     | CELLULAF molecular_function unknown                                                                    |
| CA4044 | 1.0 | 1.0 | 1.0 | GAL7       | 13012925..UDP-glucose-hexose-        | orf19.3675  | 9203 IPF5291     | C-compound and carbohydrate metabolism SUBCELLULAR LOCALISATION                                        |
| CA4045 | 1.1 | 1.1 | 1.1 | ABP140     | 13014486..putative methyltransfer    | orf19.3676  | 9204 CaGAL7      | C-compound and carbohydrate metabolism SUBCELLULAR LOCALISATION                                        |
| CA4046 | 1.0 | 0.9 | 1.0 | IPF9205    | complemer similar to Saccharomy      | orf19.3677  | 9205 CaABP140    | UNCLASSIFIED PROTEINS                                                                                  |
| CA4047 | 1.0 | 1.1 | 1.1 | IPF9206    | 13017190..unknown function           | orf19.3678  | 9206 IPF9205     | PROTEIN I molecular_function unknown                                                                   |
| CA4048 | 1.0 | 0.9 | 1.1 | IPF9207    | complemer unknown function           | orf19.1116  | 9207 IPF9206     | No significant S.c. match                                                                              |
| CA4049 | 1.0 | 1.0 | 1.1 | IPF10482.f | 13024198..unknown function, exo      | orf19.8054  | 10482 IPF9207    | UNCLASSI molecular_function unknown                                                                    |
| CA4050 | 1.0 | 1.0 | 1.0 | IPF10482.f | 13024939..unknown function, exo      | orf19.425   | 20007 IPF10482.ε | CELL RESCUE DEFENSE AND VIRULENCE ""REGULATION OF/INTERACTION WITH CELLULAR ENVIRONMENT SUBCELLULAR LC |
| CA4051 | 1.0 | 1.0 | 1.0 | IPF10231.f | 13025769..similar to Saccharomy      | orf19.426   | 10233 IPF10482.ε | UNCLASSI molecular_function unknown                                                                    |
| CA4052 | 0.9 | 1.0 | 0.8 | IPF10231.f | 13027896..similar to Saccharomy      | orf19.427   | 10231 IPF10231.ε | CELL CYCLE AND DNA PROCESSING TRANSCRIPTION SUBCELLULAR LOCALISATION                                   |
| CA4053 | 1.0 | 1.0 | 1.0 | IKS1       | 13033171..PROBABLE SERINE/           | orf19.428   | 7725 IPF10231.ε  | TRANSCR molecular_function unknown                                                                     |
| CA4054 | 0.9 | 0.9 | 0.9 | TRF4       | 13035598..Topoisomerase I-relate     | orf19.429   | 7724 CaIKS1      | UNCLASSI molecular_function unknown                                                                    |
| CA4055 | 1.0 | 1.0 | 1.1 | YPT522     | complemer GTP-binding protein of     | orf19.430   | 7723 CaTRF4      | CELL CYC nucleotidyltransferase activity                                                               |
| CA4056 | 1.0 | 0.9 | 0.9 | IPF7721    | 13039034..unknown function           | orf19.431   | 7721 CaYPT522    | CELLULAR TRANSPORT AND TRANSPORT MECHANISMS SUBCELLULAR LOCALISATION                                   |
| CA4057 | 1.1 | 1.0 | 1.1 | IPF7719    | 13041664..unknown function           | orf19.432   | 7719 IPF7721     | Amino acid metabolism TRANSCRIPTION SUBCELLULAR LOCALISATION UNCLASSIFIED PROTEINS                     |
| CA4058 | 1.0 | 1.0 | 1.1 | IPF7717    | 13043295..unknown function           | orf19.8063  | 7717 IPF7719     | UNCLASSI protein binding                                                                               |
| CA4059 | 1.0 | 1.2 | 0.9 | PRD1       | 13045920..Proteinase (by homolo      | orf19.8064  | 5940 IPF7717     | C-compour molecular_function unknown                                                                   |
| CA4060 | 1.0 | 1.1 | 1.0 | GRS1       | complemer glycine-tRNA ligase (b     | orf19.437   | 5937 CaPRD1      | PROTEIN I peptidase activity                                                                           |
| CA4061 | 1.1 | 1.1 | 1.0 | IPF5935    | complemer Unknown function           | orf19.438   | 5935 CaGRS1      | PROTEIN I ligase activity                                                                              |
| CA4062 | 1.0 | 1.0 | 1.0 | IPF5933    | 13052447..similar to Saccharomy      | orf19.439   | 5933 IPF5935     | UNCLASSI molecular_function unknown                                                                    |
| CA4063 | 1.0 | 0.9 | 1.1 | SDH11      | 13053735..Succinate dehydrogen       | orf19.440   | 5931 IPF5933     | CELL CYC transcription regulator activity                                                              |
| CA4064 | 0.8 | 0.8 | 0.9 | RPT1       | 13055941..26S PROTEASE REG           | orf19.441   | 5928 CaSDH11     | C-compour oxidoreductase activity                                                                      |
| CA4065 | 1.0 | 1.0 | 1.0 | RPC25      | complemer DNA-direcred RNA pol       | orf19.443   | 5926 CaRPT1      | CELL CYC peptidase activity                                                                            |
| CA4066 | 1.0 | 1.0 | 1.0 | IPF5925    | 13058238..RNA-binding protein (t     | orf19.444   | 5925 CaRPC25     | TRANSCR nucleotidyltransferase activity                                                                |
| CA4067 | 1.0 | 0.9 | 1.0 | IPF5924    | 13058888..unknown function           | orf19.445   | 5924 IPF5925     | TRANSCRIPTION SUBCELLULAR LOCALISATION                                                                 |
| CA4068 | 0.7 | 0.9 | 0.8 | IPF5922    | 13061155..unknown function           | orf19.446   | 5922 IPF5924     | UNCLASSI molecular_function unknown                                                                    |
| CA4069 |     |     |     | MHP1       | 13066468..13068705                   |             | IPF5922          | No significant S.c. match                                                                              |
| CA4070 | 1.0 | 1.1 | 1.0 | IPF2562    | complemer unknown function           | orf19.6623  | 2562             |                                                                                                        |
| CA4071 | 0.9 | 1.1 | 0.9 | IPF2561    | complemer unknown function           | orf19.6624  | 2561 IPF2562     | UNCLASSI molecular_function unknown                                                                    |
| CA4072 | 0.8 | 0.7 | 0.9 | IPF2560    | 13071318..unknown function           | orf19.6625  | 2560 IPF2561     | CELLULAF enzyme regulator activity                                                                     |
| CA4073 | 0.9 | 0.9 | 1.0 | IPF2559.3  | complemer unknown function, 3-pr     | orf19.6626  | 2559 IPF2560     | CELL CYC molecular_function unknown                                                                    |
| CA4074 | 1.0 | 1.0 | 1.0 | IPF2557    | complemer unknown function           | orf19.6627  | 2557 IPF2559.3   | No significant S.c. match                                                                              |
| CA4075 | 1.0 | 0.9 | 1.0 | IPF2555    | complemer unknown function           | orf19.6628  | 2555 IPF2557     | UNCLASSI molecular_function unknown                                                                    |
| CA4076 | 1.0 | 0.9 | 1.0 | IPF2542    | 13075857..putative neutral sphing    | orf19.6629  | 2542 IPF2555     | SUBCELLULAR LOCALISATION                                                                               |
| CA4077 | 1.0 | 0.9 | 1.1 | ACO2       | 13079616..aconitate hydratase (b     | orf19.6632  | 2530 IPF2542     | Lipid fatty-ε hydrolase activity                                                                       |
| CA4078 | 1.0 | 1.2 | 1.0 | VMA2       | complemer H+-transporting ATPas      | orf19.6634  | 2528 CaACO2      | ENERGY lyase activity                                                                                  |
| CA4079 | 1.0 | 1.0 | 0.9 | IPF2527    | complemer unknown function           | orf19.6635  | 2527 CaVMA2      | CELLULAF transporter activity                                                                          |
| CA4080 | 0.9 | 1.1 | 1.0 | IPF2524    | 13085887..unknown function           | orf19.6636  | 2524 IPF2527     | No significant S.c. match                                                                              |
| CA4081 | 1.1 | 1.1 | 1.0 | IPF2523    | complemer unknown function           | orf19.6637  | 2523 IPF2524     | UNCLASSI molecular_function unknown                                                                    |
| CA4082 | 1.0 | 0.9 | 1.0 | PTC4       | 13089027..ser/thr protein phosph     | orf19.6638  | 15571 IPF2523    | No significant S.c. match                                                                              |

|        |     |     |     |           |                                            |            |                |                                                                                                    |
|--------|-----|-----|-----|-----------|--------------------------------------------|------------|----------------|----------------------------------------------------------------------------------------------------|
| CA4083 | 1.1 | 1.0 | 0.9 | IPF5018   | 13091134..unknown function                 | orf19.6639 | 5018 CaPTC4    | CLASSIFIC protein phosphatase activity                                                             |
| CA4084 | 1.8 | 2.3 | 1.4 | TPS1      | complemer TREHALOSE-6-PHOS                 | orf19.6640 | 5016 IPF5018   | UNCLASSIFIED PROTEINS                                                                              |
| CA4085 | 1.1 | 1.1 | 1.0 | IPF5015   | 13095177..unknown function                 | orf19.6641 | 5015 CaTPS1    | C-compour transferase activity                                                                     |
| CA4086 | 1.1 | 1.1 | 1.0 | IPF5014   | 13096360..unknown function                 | orf19.6642 | 5014 IPF5015   | No significant S.c. match                                                                          |
| CA4087 | 1.1 | 1.0 | 1.1 | IPF5013   | complemer similar to Saccharomy            | orf19.6643 | 5013 IPF5014   | CELLULAF molecular_function unknown                                                                |
| CA4088 | 1.8 | 1.3 | 1.3 | HMO1      | 13099520..High-mobility protein 1          | orf19.6645 | 5011 IPF5013   | Lipid fatty- $\epsilon$ transferase activity                                                       |
| CA4089 | 1.0 | 1.1 | 0.9 | IPF5009   | complemer unknown function                 | orf19.6648 | 5009 CaHMO1    | SUBCELLL DNA binding,transcription regulator activity                                              |
| CA4090 | 1.0 | 0.9 | 0.9 | BRF1      | complemer TFIIB subunit                    | orf19.6649 | 5007 IPF5009   | CELL CYC molecular_function unknown                                                                |
| CA4091 | 0.9 | 0.9 | 1.0 | IPF5005   | 13104923..unknown function                 | orf19.6650 | 5005 CaBRF1    | TRANSCR transcription regulator activity                                                           |
| CA4092 | 1.0 | 1.1 | 1.0 | DBP8      | complemer DEAD box protein ATF             | orf19.6652 | 5004 IPF5005   | No significant S.c. match                                                                          |
| CA4093 | 1.0 | 1.0 | 1.0 | IPF5002   | 13107433..GTP binding protein (b           | orf19.6653 | 5002 CaDBP8    | TRANSCR RNA binding,helicase activity                                                              |
| CA4094 | 1.0 | 0.9 | 1.0 | IPF4004   | 13114300..unknown function                 | orf19.658  | 4004 IPF5002   | CLASSIFIC molecular_function unknown                                                               |
| CA4095 | 0.9 | 0.8 | 0.9 | IPF4002   | complemer unknown function                 | orf19.660  | 4002 IPF4004   | UNCLASSI molecular_function unknown                                                                |
| CA4096 | 1.0 | 1.0 | 1.0 | KRR1      | complemer involved in cell division        | orf19.661  | 4000 IPF4002   | No significant S.c. match                                                                          |
| CA4097 | 1.0 | 0.9 | 1.1 | GIN4      | 13124277..ser/thr protein kinase (         | orf19.663  | 3994 CaKRR1    | SUBCELLL molecular_function unknown                                                                |
| CA4098 | 1.0 | 1.0 | 1.0 | IPF3988   | complemer unknown function                 | orf19.664  | 3988 CaGIN4    | CELL CYC protein kinase activity                                                                   |
| CA4099 | 0.9 | 0.8 | 1.0 | IPF3986   | complemer unknown function                 | orf19.665  | 3986 IPF3988   | CELLULAR TRANSPORT AND TRANSPORT MECHANISMS CELL FATE CONTROL OF CELLULAR ORGANIZATION SUBCELLULAR |
| CA4100 | 0.9 | 1.0 | 1.0 | IPF3985   | 13131074..unknown function                 | orf19.666  | 3985 IPF3986   | UNCLASSI molecular_function unknown                                                                |
| CA4101 | 1.0 | 0.9 | 1.0 | IPF3984   | 13132115..unknown function                 | orf19.667  | 3984 IPF3985   | CELL CYC protein binding                                                                           |
| CA4102 | 1.9 | 1.7 | 1.2 | RPL37B    | complemer Ribosomal protein                |            | 20156 IPF3984  | No significant S.c. match                                                                          |
| CA4103 | 1.0 | 0.9 | 1.1 | IPF3980   | 13134897..unknown function                 | orf19.668  | 3980 CaRPL37B  | PROTEIN :structural molecule activity                                                              |
| CA4104 | 0.9 | 1.0 | 1.0 | IPF20157  | complemer unknown function                 | orf19.669  | 20157 IPF3980  | UNCLASSI DNA binding,transcription regulator activity                                              |
| CA4105 | 1.2 | 1.2 | 1.1 | SMT3      | 13138818..Ubiquitin-like protein (t        | orf19.670  | 20158 IPF20157 | UNCLASSI molecular_function unknown                                                                |
| CA4107 | 1.0 | 0.9 | 0.9 | IPF3970   | 13140769..unknown function                 | orf19.671  | 3970 CaSMT3    | PROTEIN FATE [folding modification destination]                                                    |
| CA4108 | 0.9 | 0.9 | 0.9 | IPF3968   | 13145290..similar to Saccharomy            | orf19.672  | 3968 IPF3970   | UNCLASSI molecular_function unknown                                                                |
| CA4109 | 1.0 | 1.0 | 0.9 | IPF3967   | complemer unknown function                 | orf19.673  | 3967 IPF3968   | TRANSCR RNA binding,helicase activity                                                              |
| CA4110 | 1.0 | 1.0 | 1.0 | IPF3965   | complemer unknown function                 | orf19.674  | 3965 IPF3967   | ENERGY                                                                                             |
| CA4111 | 1.3 | 1.5 | 1.4 | IPF3964   | complemer unknown function                 | orf19.675  | 3964 IPF3965   | UNCLASSI molecular_function unknown                                                                |
| CA4112 | 1.0 | 0.9 | 1.0 | BIM1      | complemer microtubule-binding pr           | orf19.676  | 7699 IPF3964   | No significant S.c. match                                                                          |
| CA4113 | 1.0 | 1.5 | 1.1 | CHO1      | 13154895..Phosphatidylserine syr           | orf19.677  | 7703 CaBIM1    | CELL CYC structural molecule activity                                                              |
| CA4114 | 0.9 | 1.0 | 1.1 | IPF7704   | complemer unknown function                 | orf19.679  | 7704 CaCHO1    | Lipid fatty- $\epsilon$ transferase activity                                                       |
| CA4115 | 1.1 | 1.0 | 1.0 | IPF7706   | 13156638..putative plasma memb             | orf19.680  | 7706 IPF7704   | No significant S.c. match                                                                          |
| CA4116 | 1.0 | 1.0 | 0.9 | IDI1      | 13165199..isopentenyl-diphospha            | orf19.2775 | 11947 IPF7706  | UNCLASSI molecular_function unknown                                                                |
| CA4117 | 0.9 | 0.9 | 0.9 | LAB5      | 13166539..lipoic acid synthase (b)         | orf19.2774 | 11949 CaIDI1   | Lipid fatty- $\epsilon$ isomerase activity                                                         |
| CA4118 | 1.1 | 1.1 | 1.1 | IPF11952  | 13168575..similar to Saccharomy            | orf19.2772 | 11952 CaLAB5   | Metabolism of vitamins cofactors and prosthetic groups ""SUBCELLULAR LOCALISATION                  |
| CA4119 | 1.0 | 0.9 | 1.0 | BEM3      | 13172328..GTPase-activating pro            | orf19.2771 | 7085 IPF11952  | CLASSIFIC hydrolase activity                                                                       |
| CA4120 | 1.4 | 1.4 | 1.3 | SOD1.3    | complemer Cu,Zn-superoxide dismutase, 3-pr |            | 7082 CaBEM3    | CELL FATI signal transducer activity                                                               |
| CA4121 | 1.0 | 1.0 | 0.9 | IPF7081   | complemer unknown function                 | orf19.2770 | 7081 CaSOD1.3  | CELL RES oxidoreductase activity                                                                   |
| CA4122 | 1.0 | 1.2 | 1.1 | PBI2      | 13178853..proteinase B inhibitor 2         | orf19.2769 | 7079 IPF7081   | No significant S.c. match                                                                          |
| CA4123 | 1.3 | 0.8 | 1.9 | AMS1      | 13179983..alpha-mannosidase (b)            | orf19.2768 | 7076 CaPBI2    | PROTEIN I enzyme regulator activity                                                                |
| CA4124 | 3.5 | 2.1 | 4.8 | IPF20008  | complemer unknown function                 | orf19.2767 | 20008 CaAMS1   | C-compour hydrolase activity                                                                       |
| CA4125 | 3.3 | 1.8 | 4.3 | IPF20161  | 13195669..unknown function                 | orf19.1028 | 20161 IPF20008 | No significant S.c. match                                                                          |
| CA4126 | 1.0 | 1.0 | 1.0 | IPF6631   | complemer unknown function                 | orf19.2763 | 6631 IPF20161  | No significant S.c. match                                                                          |
| CA4127 | 2.3 | 2.0 | 4.0 | IPF6629   | complemer unknown function                 | orf19.2762 | 6629 IPF6631   | UNCLASSIFIED PROTEINS                                                                              |
| CA4128 | 1.1 | 1.0 | 1.0 | IPF6876   | 13208708..unknown function                 | orf19.1172 | 6876 IPF6629   | CELL RES oxidoreductase activity                                                                   |
| CA4129 | 0.9 | 1.0 | 0.9 | IPF6878   | complemer unknown function                 | orf19.1172 | 6878 IPF6876   | No significant S.c. match                                                                          |
| CA4130 | 0.9 | 0.9 | 1.2 | IPF20009  | 13216409..Unknown function                 | orf19.1172 | 20009 IPF6878  | CLASSIFIC hydrolase activity                                                                       |
| CA4131 | 1.0 | 0.9 | 0.9 | IPF6886   | 13218620..unknown function                 | orf19.1171 | 6886 IPF20009  | REGULATI molecular_function unknown                                                                |
| CA4132 | 1.0 | 1.0 | 1.0 | STE20     | 13221889..serine/threonine-specif          | orf19.4242 | 7017 IPF6886   | UNCLASSI protein binding                                                                           |
| CA4133 | 1.1 | 1.8 | 1.3 | IPF7010.3 | complemer unknown function, 3-pr           | orf19.4241 | 7011 CaSTE20   | REGULATI protein kinase activity                                                                   |
| CA4134 | 1.1 | 1.2 | 1.0 | COS162    | 13228250..involved in manganese            | orf19.4240 | 7009 IPF7010.3 | No significant S.c. match                                                                          |
| CA4135 | 0.9 | 0.9 | 1.0 | IPF20163  | 13229832..unknown function                 | orf19.4239 | 20163 CaCOS162 | REGULATI molecular_function unknown                                                                |
| CA4136 | 1.2 | 1.0 | 1.2 | RET2      | 13232107..Coatomer complex del             | orf19.4236 | 7005 IPF20163  | No significant S.c. match                                                                          |
| CA4137 | 0.9 | 1.0 | 0.9 | CNA1      | complemer cyclic nucleotide phos           | orf19.4235 | 7003 CaRET2    | CELLULAF protein binding                                                                           |
| CA4138 | 0.9 | 0.9 | 0.9 | IPF11954  | 13237155..unknown function                 | orf19.4234 | 11954 CaCNA1   | Nucleotide hydrolase activity                                                                      |
| CA4139 | 1.0 | 1.1 | 1.0 | THR4      | complemer threonine synthase (by           | orf19.4233 | 11957 IPF11954 | UNCLASSI molecular_function unknown                                                                |
| CA4140 | 0.8 | 0.9 | 0.8 | IPF11959  | 13240577..unknown function                 | orf19.4232 | 11959 CaTHR4   | Amino acid lyase activity                                                                          |
| CA4141 | 1.0 | 1.0 | 1.0 | PTH2      | complemer proline transport helpe          | orf19.1170 | 16485 IPF11959 | UNCLASSI molecular_function unknown                                                                |
| CA4142 | 1.1 | 1.0 | 1.8 | PRE4      | complemer 20S proteasome subur             | orf19.1170 | 13337 CaPTH2   | CLASSIFICATION NOT YET CLEAR-CUT                                                                   |
| CA4143 | 0.9 | 0.5 | 1.0 | DDP1      | 13251761..diadenosine and diphos           | orf19.4229 | 13339 CaPRE4   | PROTEIN I peptidase activity                                                                       |
| CA4144 | 1.1 | 1.0 | 1.0 | IPF13340  | complemer unknown function                 | orf19.4228 | 13340 CaDDP1   | CELL RES hydrolase activity                                                                        |
| CA4145 | 0.9 | 1.0 | 1.1 | IPF3130   | complemer unknown function                 | orf19.4227 | 3130 IPF13340  | UNCLASSI molecular_function unknown                                                                |
| CA4146 | 1.0 | 0.9 | 1.0 | LEU3      | 13256314..Binds to UASs in prom            | orf19.1170 | 3138 IPF3130   | No significant S.c. match                                                                          |
| CA4147 | 1.0 | 1.0 | 0.9 | ADE8      | 13263190..Phosphoribosylglycina            | orf19.1321 | 17327 CaLEU3   | Amino acid transcription regulator activity                                                        |
| CA4148 | 0.9 | 0.9 | 1.0 | IDH2      | complemer Isocitrate dehydrogena           | orf19.1321 | 6833 CaADE8    | Nucleotide transferase activity                                                                    |
| CA4149 | 0.9 | 1.0 | 1.0 | SMP3      | 13266283..Protein kinase C pathw           | orf19.5792 | 6831 CaIDH2    | C-compour oxidoreductase activity                                                                  |
| CA4150 | 1.5 | 1.2 | 1.3 | RPT3      | complemer 26S proteasome reguli            | orf19.5793 | 6830 CaSMP3    | CELL CYC molecular_function unknown                                                                |
| CA4151 | 0.9 | 1.0 | 1.0 | SHE9      | complemer causes lethality when            | orf19.5796 | 6829 CaRPT3    | PROTEIN I peptidase activity                                                                       |
| CA4153 | 0.9 | 1.1 | 1.0 | DNLI      | complemer CANAL DNA LIGASE                 | orf19.5798 | 6823 CaSHE9    | UNCLASSI molecular_function unknown                                                                |
| CA4154 | 0.5 | 0.3 | 0.8 | IPF20010  | 13277763..unknown function                 | orf19.5799 | 20010 CaDNLI   | CELL CYC ligase activity                                                                           |
| CA4155 | 1.1 | 1.1 | 1.2 | RNR21     | 13281287..ribonucleoside-diphos            | orf19.5801 | 10991 IPF20010 | UNCLASSIFIED PROTEINS                                                                              |
| CA4156 | 1.1 | 0.9 | 1.0 | IPF10990  | 13282933..unknown function                 | orf19.5802 | 10990 CaRNR21  | Nucleotide oxidoreductase activity                                                                 |



|        |     |     |     |            |                                             |             |       |            |                                                      |                                                                                    |                     |
|--------|-----|-----|-----|------------|---------------------------------------------|-------------|-------|------------|------------------------------------------------------|------------------------------------------------------------------------------------|---------------------|
| CA4157 | 0.9 | 1.0 | 1.0 | HYU1       | 13284597..hydantoin utilization pr          | orf19.5804  | 10288 | IPF10990   | UNCLASSI                                             | molecular_function                                                                 | unknown             |
| CA4158 | 1.0 | 1.0 | 0.9 | DLD3       | 13288923..D-lactate ferricytochro           | orf19.5805  | 10287 | CaHYU1     | Amino acid                                           | molecular_function                                                                 | unknown             |
| CA4159 | 0.9 | 1.2 | 0.6 | ALD5       | 13293088..aldehyde dehydrogena              | orf19.13221 | 17030 | CaDLD3     | C-compound and carbohydrate metabolism               | ENERGY SUBCELLULAR LOCALISATION                                                    |                     |
| CA4160 | 1.0 | 1.0 | 1.1 | IPF9294    | 13294957..unknown function                  | orf19.5808  | 9294  | CaALD5     | ENERGY                                               | ε oxidoreductase activity                                                          |                     |
| CA4161 | 1.0 | 0.9 | 1.0 | IPF20164   | complemer putative kynurenine an            | orf19.5809  | 20164 | IPF9294    | UNCLASSI                                             | transferase activity                                                               |                     |
| CA4162 | 0.8 | 0.2 | 1.0 | MET1       | complemer siroheme synthase (by             | orf19.5811  | 9300  | IPF20164   | Nitrogen ar                                          | hydrolase activity                                                                 |                     |
| CA4163 | 0.5 | 0.3 | 0.8 | IPF9301    | 13300548..unknown function                  | orf19.5812  | 9301  | CaMET1     | Metabolism                                           | transferase activity                                                               |                     |
| CA4164 | 0.9 | 1.0 | 1.2 | IPF9302    | complemer unknown function                  | orf19.13231 | 9302  | IPF9301    | UNCLASSI                                             | molecular_function                                                                 | unknown             |
| CA4165 | 1.0 | 1.0 | 1.1 | IPF7774    | complemer unknown function                  | orf19.10481 | 7774  | IPF9302    | UNCLASSI                                             | molecular_function                                                                 | unknown             |
| CA4166 | 1.0 | 1.2 | 1.0 | TIF34      | complemer Translation initiation fa         | orf19.2967  | 7775  | IPF7774    | No significant S.c.                                  | match                                                                              |                     |
| CA4167 | 1.3 | 1.1 | 1.2 | IPF7778    | complemer putative carboxymethy             | orf19.2966  | 7778  | CaTIF34    | PROTEIN                                              | translation regulator activity                                                     |                     |
| CA4168 | 0.9 | 1.0 | 0.9 | IPF7781    | complemer putative pump-driving             | orf19.2965  | 7781  | IPF7778    | UNCLASSI                                             | hydrolase activity                                                                 |                     |
| CA4169 | 1.0 | 1.0 | 1.0 | RSC2       | 13309517..Member of RSC complor             | orf19.2964  | 7783  | IPF7781    | CELL RES                                             | molecular_function                                                                 | unknown             |
| CA4170 | 0.9 | 0.9 | 1.0 | IPF7784    | 13312164..unknown function                  | orf19.2963  | 7784  | CaRSC2     | CELL CYC                                             | molecular_function                                                                 | unknown             |
| CA4171 | 1.0 | 1.0 | 1.0 | IPF7785    | complemer unknown function                  | orf19.2962  | 7785  | IPF7784    | CELL CYCLE AND DNA PROCESSING TRANSCRIPTION          | PROTEIN FATE [folding modification destination]                                    | CELL FATE SUBCELLUL |
| CA4172 | 1.0 | 1.0 | 1.0 | IPF4432    | complemer unknown function                  | orf19.2961  | 4432  | IPF7785    | No significant S.c.                                  | match                                                                              |                     |
| CA4173 | 1.0 | 1.2 | 0.9 | FRS2       | complemer phenylalanine--tRNA li            | orf19.2960  | 4431  | IPF4432    | CELL CYCLE AND DNA PROCESSING TRANSCRIPTION          | SUBCELLULAR LOCALISATION                                                           |                     |
| CA4174 | 0.9 | 1.1 | 0.9 | IPF4119.5  | 13324134..unknown function, 5-prime end     |             | 4430  | CaFRS2     | PROTEIN                                              | ligase activity                                                                    |                     |
| CA4175 | 1.0 | 1.0 | 1.0 | IPF4425.RI | 13327113..unknown function                  | orf19.2958  | 4427  | IPF4119.5  | CLASSIFICATION NOT YET CLEAR-CUT                     |                                                                                    |                     |
| CA4176 | 0.9 | 0.9 | 0.9 | IPF4425.RI | 13330464..unknown function                  | orf19.2957  | 4425  | IPF4425.re | UNCLASSIFIED PROTEINS                                |                                                                                    |                     |
| CA4177 | 1.0 | 1.0 | 1.0 | MGM101     | 13333161..mitochondrial genome              | orf19.2956  | 4423  | IPF4425.re | UNCLASSIFIED PROTEINS                                |                                                                                    |                     |
| CA4178 | 1.1 | 0.9 | 1.0 | IPF4421    | complemer unknown function                  | orf19.2954  | 4421  | CaMGM10    | CELL CYC                                             | DNA binding                                                                        |                     |
| CA4179 | 0.9 | 1.0 | 1.0 | TOM20      | 13335192..mitochondrial outer me            | orf19.2953  | 4420  | IPF4421    | No significant S.c.                                  | match                                                                              |                     |
| CA4180 | 1.0 | 1.0 | 1.0 | EXG2       | 13336189..glucan 1,3-beta-glucos            | orf19.2952  | 4419  | CaTOM20    | PROTEIN                                              | transporter activity                                                               |                     |
| CA4181 | 0.9 | 1.1 | 0.9 | HOM6       | 13337992..homoserine dehydroge              | orf19.2951  | 4417  | CaEXG2     | C-compound and carbohydrate metabolism               | CELL FATE SUBCELLULAR LOCALISATION                                                 |                     |
| CA4182 | 1.1 | 1.0 | 0.9 | IPF19797   | complemer similar to Saccharomy             | orf19.10461 | 19797 | CaHOM6     | Amino acid oxidoreductase activity                   |                                                                                    |                     |
| CA4183 | 1.0 | 1.0 | 1.1 | SNO1       | complemer hisH-like protein (by hc          | orf19.10461 | 4408  | IPF19797   | CELL CYC                                             | molecular_function                                                                 | unknown             |
| CA4184 | 1.1 | 1.0 | 1.1 | SNZ1       | 13345964..stationary phase protei           | orf19.2947  | 10248 | CaSNO1     | CELL RES                                             | protein binding                                                                    |                     |
| CA4185 | 0.9 | 0.8 | 0.8 | HNM4       | complemer Choline permease-like             | orf19.2946  | 10246 | CaSNZ1     | CELL CYC                                             | protein binding                                                                    |                     |
| CA4186 | 1.0 | 0.9 | 1.0 | PUT4       | 13349485..proline permease                  | orf19.2945  | 10243 | CaHNM4     | CELLULAR TRANSPORT AND TRANSPORT MECHANISMS          | SUBCELLULAR LOCALISATION TRANSPORT FACILITATION                                    |                     |
| CA4187 | 1.0 | 1.0 | 1.0 | IPF7524    | 13356397..unknown function                  | orf19.12001 | 7524  | CaPUT4     | Amino acid metabolism                                | TRANSPORT FACILITATION                                                             |                     |
| CA4188 | 1.1 | 1.1 | 1.0 | IPF7525    | 13357317..unknown function                  | orf19.4529  | 7525  | IPF7524    | UNCLASSI                                             | molecular_function                                                                 | unknown             |
| CA4189 | 2.2 | 1.7 | 1.7 | IPF7527    | complemer unknown function                  |             | 7527  | IPF7525    | No significant S.c.                                  | match                                                                              |                     |
| CA4190 | 1.0 | 1.0 | 1.1 | IPF7530    | complemer ATP-binding-cassette              | orf19.12001 | 7530  | IPF7527    | CELLULAR COMMUNICATION/SIGNAL TRANSDUCTION MECHANISM | REGULATION OF/INTERACTION WITH CELLULAR ENVIRON                                    |                     |
| CA4191 | 0.9 | 1.0 | 0.9 | IPF7531    | complemer unknown function                  | orf19.12001 | 7531  | IPF7530    | TRANSPO                                              | transporter activity,hydrolase activity                                            |                     |
| CA4192 | 1.0 | 1.0 | 1.0 | IPF7533    | 13367323..unknown function                  | orf19.4533  | 7533  | IPF7531    | UNCLASSI                                             | molecular_function                                                                 | unknown             |
| CA4193 | 1.0 | 0.8 | 0.9 | IPF7535    | 13369287..unknown function                  | orf19.4534  | 7535  | IPF7533    | PROTEIN                                              | IRNA binding                                                                       |                     |
| CA4194 | 1.0 | 0.9 | 1.1 | PTR3       | 13371163..transcriptional regulato          | orf19.4535  | 19799 | IPF7535    | UNCLASSI                                             | molecular_function                                                                 | unknown             |
| CA4195 | 0.9 | 1.0 | 1.0 | CYS4       | 13373807..cystathionine beta-syn            | orf19.4536  | 8061  | CaPTR3     | TRANSCRIPTION                                        |                                                                                    |                     |
| CA4196 | 1.1 | 0.8 | 1.0 | DST1       | complemer RNA polymerase II elo             | orf19.4537  | 8059  | CaCYS4     | Amino acid                                           | lyase activity                                                                     |                     |
| CA4197 | 0.8 | 0.8 | 1.0 | IPF8057    | 13376497..similar to Saccharomy             | orf19.4538  | 8057  | CaDST1     | CELL CYC                                             | transcription regulator activity                                                   |                     |
| CA4198 | 1.0 | 0.9 | 1.0 | IPF8055    | 13377995..unknown function                  | orf19.4539  | 8055  | IPF8057    | TRANSCR                                              | RNA binding                                                                        |                     |
| CA4199 | 1.0 | 1.0 | 1.0 | UBC8       | 13379302..ubiquitin-conjugating e           | orf19.4540  | 8054  | IPF8055    | CELL FATE SUBCELLULAR LOCALISATION                   | PROTEIN ACTIVITY REGULATION                                                        |                     |
| CA4200 | 0.9 | 0.9 | 0.9 | CCL1       | 13380436..cyclin (by homology)              | orf19.4542  | 8051  | CaUBC8     | PROTEIN FATE [folding modification destination]      |                                                                                    |                     |
| CA4201 | 1.1 | 0.9 | 1.1 | IPF8048    | 13381912..probable succinate-ser            | orf19.4543  | 8048  | CaCCL1     | CELL CYC                                             | transcription regulator activity                                                   |                     |
| CA4202 | 0.9 | 0.9 | 1.0 | IPF8047    | complemer unknown function                  | orf19.4544  | 8047  | IPF8048    | Amino acid                                           | metabolism                                                                         |                     |
| CA4203 | 1.0 | 1.0 | 1.0 | SWI4       | complemer transcription factor (by          | orf19.12021 | 17386 | IPF8047    | No significant S.c.                                  | match                                                                              |                     |
| CA4204 | 0.9 | 0.9 | 0.7 | HOL4       | 13390282..member of major facilit           | orf19.1202  | 14750 | CaSWI4     | CELL CYCLE AND DNA PROCESSING TRANSCRIPTION          | SUBCELLULAR LOCALISATION                                                           |                     |
| CA4205 | 0.8 | 0.7 | 1.0 | IFA10      | complemer unknown function                  | orf19.1202  | 9076  | CaHOL4     | CELL RESCUE DEFENSE AND VIRULENCE                    | TRANSPORT FACILITATION                                                             |                     |
| CA4206 | 1.0 | 0.9 | 1.0 | IPF9079    | complemer Membrane transporter              | orf19.4550  | 9079  | CaIFA10    | Nucleotide metabolism                                | CELL CYCLE AND DNA PROCESSING CELLULAR COMMUNICATION/SIGNAL TRANSDUCTION MECHANISM |                     |
| CA4207 | 0.5 | 0.6 | 0.4 | YAT1       | complemer carnitine acetyltransfer          | orf19.4551  | 9082  | IPF9079    | CELL RES                                             | molecular_function                                                                 | unknown             |
| CA4208 | 1.0 | 1.1 | 1.0 | CHS5.5EO   | complemer chitin biosynthesis, 5-prime end  |             | 18240 | CaYAT1     | Lipid fatty-ε                                        | transferase activity                                                               |                     |
| CA4209 | 1.1 | 0.9 | 0.9 | DEP1.3F    | complemer Regulator of phospholi            | orf19.8427  | 18239 | CaCHS5.5   | C-compound and carbohydrate metabolism               | CELL FATE SUBCELLULAR LOCALISATION                                                 |                     |
| CA4210 | 0.9 | 1.0 | 1.2 | DEP1.5F    | complemer Regulator of phospholi            | orf19.8428  | 18238 | CaDEP1.3I  | Lipid fatty-ε                                        | molecular_function                                                                 | unknown             |
| CA4211 | 0.9 | 1.0 | 0.9 | IPF5052    | 13410471..RNA-binding protein (t            | orf19.809   | 5051  | CaDEP1.5I  | No significant S.c.                                  | match                                                                              |                     |
| CA4212 | 1.0 | 0.9 | 1.0 | HFM1       | complemer DNA/RNA helicase by               | orf19.810   | 5050  | IPF5052    | UNCLASSI                                             | IRNA binding                                                                       |                     |
| CA4213 | 1.1 | 0.9 | 1.0 | IPF5795    | complemer unknown function                  | orf19.811   | 5795  | CaHFM1     | TRANSCR                                              | DNA binding,helicase activity                                                      |                     |
| CA4214 | 0.9 | 0.9 | 0.9 | IPF5796    | complemer unknown function                  | orf19.812   | 5796  | IPF5795    | UNCLASSI                                             | molecular_function                                                                 | unknown             |
| CA4215 | 0.7 | 0.7 | 0.8 | SSY1       | 13422639..Regulator of transport            | orf19.8434  | 5802  | IPF5796    | No significant S.c.                                  | match                                                                              |                     |
| CA4216 | 1.2 | 1.6 | 1.6 | IPF5806    | 13426650..unknown function                  | orf19.8435  | 5806  | CaSSY1     | Amino acid metabolism                                | TRANSCRIPTION                                                                      |                     |
| CA4217 | 0.9 | 0.9 | 0.9 | IPF5809    | 13433312..unknown function                  | orf19.816   | 5809  | IPF5806    | UNCLASSI                                             | molecular_function                                                                 | unknown             |
| CA4218 | 1.2 | 1.2 | 1.1 | ACP1       | 13438905..mitochondrial acyl carr           | orf19.819   | 8766  | IPF5809    | UNCLASSIFIED PROTEINS                                |                                                                                    |                     |
| CA4219 | 1.0 | 0.9 | 1.0 | SDS22      | 13439771..regulatory subunit for t          | orf19.820   | 8765  | CaACP1     | Lipid fatty-acid and isoprenoid metabolism           | SUBCELLULAR LOCALISATION TRANSPORT FACILITATION                                    |                     |
| CA4220 | 0.8 | 0.6 | 0.6 | IPF8762    | 13441293..unknown function                  | orf19.822   | 8762  | CaSDS22    | CELL CYC                                             | enzyme regulator activity                                                          |                     |
| CA4221 | 1.0 | 1.1 | 1.0 | IPF8760    | 13442052..unknown function                  | orf19.823   | 8760  | IPF8762    | No significant S.c.                                  | match                                                                              |                     |
| CA4222 | 0.8 | 0.9 | 1.0 | GCD7       | complemer translation initiation fac        | orf19.825   | 8759  | IPF8760    | No significant S.c.                                  | match                                                                              |                     |
| CA4223 | 1.1 | 1.2 | 1.0 | IPF8757    | 13444107..unknown function                  | orf19.826   | 8757  | CaGCD7     | PROTEIN                                              | translation regulator activity                                                     |                     |
| CA4224 | 1.1 | 1.1 | 1.0 | IPF8755    | complemer unknown function                  | orf19.827   | 8755  | IPF8757    | No significant S.c.                                  | match                                                                              |                     |
| CA4225 | 1.0 | 1.3 | 1.1 | RPL39.3    | complemer ribosomal protein L39, 3-prime en |             | 8753  | IPF8755    | No significant S.c.                                  | match                                                                              |                     |
| CA4226 | 1.1 | 1.0 | 1.0 | IPF8752    | complemer similar to Saccharomy             | orf19.828   | 8752  | CaRPL39.3  | PROTEIN                                              | molecular_function                                                                 | unknown             |
| CA4227 | 1.0 | 1.0 | 1.0 | SCH9       | 13452163..strong similarity to S.p          | orf19.829   | 13426 | IPF8752    | PROTEIN                                              | structural molecule activity                                                       |                     |
| CA4228 | 0.9 | 0.9 | 0.9 | IPF16057   | 13455459..unknown function                  | orf19.831   | 16057 | CaSCH9     | CELL CYC                                             | protein kinase activity                                                            |                     |

|        |     |     |     |                                                       |                                                                      |                                                                                                         |
|--------|-----|-----|-----|-------------------------------------------------------|----------------------------------------------------------------------|---------------------------------------------------------------------------------------------------------|
| CA4229 | 1.0 | 1.0 | 0.9 | IPF12480..complemer unknown function, 5-prime end     | 12480 IPF16057                                                       | C-compour transcription regulator activity                                                              |
| CA4230 | 1.1 | 1.1 | 1.0 | IPF12481 13459645..unknown function orf19.513         | 12481 IPF12480..CELLULAR COMMUNICATION/SIGNAL TRANSDUCTION MECHANISM |                                                                                                         |
| CA4231 | 1.1 | 0.9 | 1.0 | SNP3 13461408..snRNP-related protein orf19.514        | 12483 IPF12481                                                       | CELL CYCLE AND DNA PROCESSING                                                                           |
| CA4232 | 1.0 | 1.0 | 0.9 | IPF12484 complemer unknown function orf19.515         | 12484 CaSNP3                                                         | TRANSCR RNA binding                                                                                     |
| CA4233 | 1.0 | 0.9 | 1.0 | RFT1 complemer nuclear division proteir orf19.516     | 12486 IPF12484                                                       | UNCLASSI molecular_function unknown                                                                     |
| CA4234 | 0.9 | 1.0 | 1.0 | HAP3 13465254..CCAAT-binding factor orf19.517         | 12488 CaRFT1                                                         | CELL CYC transporter activity                                                                           |
| CA4235 | 1.0 | 1.0 | 1.0 | NCL1 13466093..Probable proliferating-orf19.518       | 8167 CaHAP3                                                          | TRANSCR transcription regulator activity                                                                |
| CA4236 | 1.0 | 1.0 | 0.9 | IPF8166 complemer unknown function orf19.519          | 8166 CaNCL1                                                          | TRANSCR transferase activity                                                                            |
| CA4237 | 1.1 | 1.0 | 1.0 | IPF6375 13469527..unknown function orf19.520          | 6375 IPF8166                                                         | TRANSCR DNA binding,transcription regulator activity                                                    |
| CA4238 | 1.0 | 1.0 | 1.0 | PIM1 13471159..mitochondrial ATP-dep orf19.522        | 8173 IPF6375                                                         | No significant S.c. match                                                                               |
| CA4239 | 1.0 | 0.9 | 1.0 | IPF8174 complemer unknown function orf19.524          | 8174 CaPIM1                                                          | TRANSCR peptidase activity                                                                              |
| CA4240 | 1.1 | 1.1 | 1.0 | NHP2 complemer nucleolar rRNA proces orf19.526        | 8176 IPF8174                                                         | No significant S.c. match                                                                               |
| CA4241 | 1.0 | 1.0 | 1.0 | IPF8177 13477042..unknown function orf19.527          | 8177 CaNHP2                                                          | TRANSCR RNA binding                                                                                     |
| CA4242 | 0.9 | 0.9 | 0.8 | SEC26 complemer beta chain of secretory orf19.528     | 15941 IPF8177                                                        | No significant S.c. match                                                                               |
| CA4243 | 1.0 | 1.0 | 1.0 | IPF16491 complemer unknown function orf19.529         | 16491 CaSEC26                                                        | CELLULAF molecular_function unknown                                                                     |
| CA4244 | 0.9 | 0.9 | 1.0 | IPF4305 13485139..unknown function orf19.530          | 4305 IPF16491                                                        | C-compound and carbohydrate metabolism SUBCELLULAR LOCALISATION                                         |
| CA4245 | 1.1 | 1.0 | 1.1 | IPF4303 complemer unknown function orf19.532          | 4303 IPF4305                                                         | No significant S.c. match                                                                               |
| CA4246 | 1.4 | 0.8 | 1.4 | IPF4299 complemer unknown function orf19.535          | 4299 IPF4303                                                         | No significant S.c. match                                                                               |
| CA4247 | 1.0 | 1.0 | 1.0 | TAF90 complemer Probable transcription- orf19.536     | 4296 IPF4299                                                         | No significant S.c. match                                                                               |
| CA4248 | 0.9 | 1.0 | 1.0 | IPF4294 complemer unknown function orf19.537          | 4294 CaTAF90                                                         | TRANSCR transcription regulator activity                                                                |
| CA4249 | 1.1 | 1.0 | 1.0 | IPF4293 13495440..similar to Saccharomy orf19.538     | 4293 IPF4294                                                         | UNCLASSI molecular_function unknown                                                                     |
| CA4250 | 2.0 | 1.4 | 1.3 | IPF4292 complemer bleomycin Hydrolase orf19.539       | 4292 IPF4293                                                         | Lipid fatty-ε molecular_function unknown                                                                |
| CA4251 | 1.0 | 1.0 | 1.0 | IPF4291 complemer unknown function orf19.540          | 4291 IPF4292                                                         | PROTEIN I transcription regulator activity                                                              |
| CA4252 | 1.0 | 1.0 | 1.0 | IPF4290 complemer unknown function orf19.541          | 4290 IPF4291                                                         | CELL CYCLE AND DNA PROCESSING SUBCELLULAR LOCALISATION                                                  |
| CA4253 | 0.9 | 0.9 | 1.0 | IPF4288 complemer unknown function                    | 4288 IPF4290                                                         | No significant S.c. match                                                                               |
| CA4254 | 1.0 | 1.1 | 1.1 | IPF18234..13504904..Unknown Function, 3-prime end     | 18234 IPF4288                                                        | No significant S.c. match                                                                               |
| CA4255 | 1.0 | 1.3 | 1.0 | FUM11 13505439..fumarate hydratase orf19.543          | 4283 IPF18234..UNCLASSIFIED PROTEINS                                 |                                                                                                         |
| CA4256 | 1.0 | 1.0 | 0.9 | IPF4282 complemer unknown function orf19.544          | 4282 CaFUM11                                                         | ENERGY εlyase activity                                                                                  |
| CA4257 | 1.4 | 1.0 | 1.3 | PRE6 13507748..20S proteasome subunit                 | 4281 IPF4282                                                         | TRANSCR RNA binding                                                                                     |
| CA4258 | 1.1 | 1.0 | 0.9 | IPF4279 complemer unknown function orf19.547          | 4279 CaPRE6                                                          | PROTEIN I molecular_function unknown                                                                    |
| CA4259 | 0.9 | 1.1 | 1.1 | CDC10 complemer cell division control pro orf19.548   | 4277 IPF4279                                                         | CELL CYC DNA binding                                                                                    |
| CA4260 | 0.9 | 0.8 | 0.9 | IPF4276 13511668..similar to Saccharomy orf19.549     | 4276 CaCDC10                                                         | C-compour structural molecule activity                                                                  |
| CA4261 | 1.0 | 1.0 | 1.2 | PDX3 complemer pyridoxamine-phospha orf19.550         | 4274 IPF4276                                                         | PROTEIN I structural molecule activity                                                                  |
| CA4262 | 1.1 | 1.1 | 1.0 | IPF2275 complemer unknown function orf19.6654         | 2275 CaPDX3                                                          | Metabolism oxidoreductase activity                                                                      |
| CA4263 | 1.2 | 1.2 | 1.2 | IPF2277 complemer unknown function orf19.6656         | 2277 IPF2277                                                         | UNCLASSIFIED PROTEINS                                                                                   |
| CA4264 | 1.0 | 1.1 | 1.1 | IPF2280 complemer unknown function orf19.6658         | 2280 IPF2277                                                         | REGULATION OF/INTERACTION WITH CELLULAR ENVIRONMENT SUBCELLULAR LOCALISATION TRANSPORT FACILITATION     |
| CA4265 | 1.3 | 1.2 | 1.1 | GAP6 13521030..General amino acid pe orf19.6659       | 2282 IPF2280                                                         | No significant S.c. match                                                                               |
| CA4266 | 1.6 | 1.2 | 1.4 | IPF2283 complemer unknown function orf19.6660         | 2283 CaGAP6                                                          | Amino acid metabolism CELLULAR TRANSPORT AND TRANSPORT MECHANISMS SUBCELLULAR LOCALISATION TRANSPORT FA |
| CA4267 | 0.9 | 0.9 | 1.0 | IPF2286 13526537..unknown function orf19.6661         | 2286 IPF2283                                                         | UNCLASSI molecular_function unknown                                                                     |
| CA4268 | 1.1 | 1.1 | 1.1 | IPF2287 complemer unknown function orf19.6662         | 2287 IPF2286                                                         | No significant S.c. match                                                                               |
| CA4269 | 1.3 | 1.2 | 1.2 | RPS25B complemer Cytosolic ribosomal pr orf19.6663    | 2288 IPF2287                                                         | UNCLASSI molecular_function unknown                                                                     |
| CA4270 | 1.0 | 1.0 | 1.1 | NUP2 13529973..Nuclear pore protein (t orf19.6665     | 2295 CaRPS25E                                                        | PROTEIN I structural molecule activity                                                                  |
| CA4271 | 1.0 | 0.9 | 1.0 | SAP30 13532889..Subunit of the histone orf19.6667     | 2297 CaNUP2                                                          | CELLULAF structural molecule activity                                                                   |
| CA4272 | 1.1 | 1.1 | 1.1 | CUE1 13533828..Involved in ubiquitinatio orf19.6668   | 2299 CaSAP30                                                         | TRANSCR hydrolase activity                                                                              |
| CA4273 | 1.0 | 1.0 | 1.0 | CAC2 complemer Chromatin assembly c orf19.6670        | 2301 CaCUE1                                                          | PROTEIN I protein binding                                                                               |
| CA4274 | 1.0 | 1.0 | 1.0 | LAP42 13536542..Aminopeptidase ysl p orf19.6671       | 2303 CaCAC2                                                          | CELL CYC molecular_function unknown                                                                     |
| CA4275 | 1.1 | 1.0 | 1.0 | MDJ1 13538604..Heat shock protein - ct orf19.6672     | 2305 CaLAP42                                                         | PROTEIN FATE [folding modification destination] ""SUBCELLULAR LOCALISATION                              |
| CA4276 | 0.9 | 1.0 | 0.9 | HEX1 13540810..β-N-acetylglucosaminii orf19.6673      | 2308 CaMDJ1                                                          | PROTEIN I chaperone activity                                                                            |
| CA4277 | 0.9 | 0.9 | 1.1 | BTS1 13543155..Geranylgeranyl diphos orf19.6674       | 2309 CaHEX1                                                          | No significant S.c. match                                                                               |
| CA4278 | 0.9 | 1.0 | 1.0 | IPF2310 complemer unknown function orf19.6675         | 2310 CaBTS1                                                          | Lipid fatty-ε transferase activity                                                                      |
| CA4279 | 0.9 | 1.0 | 0.9 | DPH51 13544839..Diphthamide methyltra orf19.6676      | 2311 IPF2310                                                         | No significant S.c. match                                                                               |
| CA4280 | 1.0 | 1.1 | 1.1 | IFJ5 complemer Unknown function orf19.6678            | 2313 CaDPH51                                                         | Amino acid transferase activity                                                                         |
| CA4281 | 1.0 | 0.9 | 1.0 | IPF2314 complemer unknown function orf19.6679         | 2314 CaIFJ5                                                          | UNCLASSIFIED PROTEINS                                                                                   |
| CA4282 | 1.0 | 1.1 | 1.0 | IPF2319 13552041..unknown function orf19.6680         | 2319 IPF2314                                                         | No significant S.c. match                                                                               |
| CA4283 | 1.0 | 1.1 | 1.0 | IFJ4 13555358..Unknown function orf19.6681            | 2321 IPF2319                                                         | TRANSCRIPTION                                                                                           |
| CA4284 | 0.9 | 0.5 | 1.0 | DPH52.3E complemer Diphthamide methyltra orf19.6682   | 2322 CaIFJ4                                                          | UNCLASSIFIED PROTEINS                                                                                   |
| CA4287 | 0.9 | 1.0 | 0.9 | IPF20011..13557688..similar to Saccharomyces cerevisi | 20012 CaDPH52..Amino acid metabolism                                 |                                                                                                         |
| CA4288 | 0.9 | 1.1 | 0.9 | IPF6662 complemer similar to Saccharomy orf19.6685    | 6662 IPF20011..UNCLASSIFIED PROTEINS                                 |                                                                                                         |
| CA4289 | 0.9 | 1.0 | 1.0 | IPF6665 complemer unknown function orf19.6686         | 6665 IPF6662                                                         | TRANSCR RNA binding                                                                                     |
| CA4290 | 0.9 | 0.8 | 1.0 | IPF2617 complemer unknown function orf19.6687         | 2617 IPF6665                                                         | UNCLASSI molecular_function unknown                                                                     |
| CA4291 | 0.2 | 0.4 | 0.1 | IPF2615 13568848..unknown function orf19.6688         | 2615 IPF2617                                                         | No significant S.c. match                                                                               |
| CA4293 | 1.1 | 1.1 | 1.1 | IFA8 13571419..Unknown function orf19.6690            | 2611 IPF2615                                                         | No significant S.c. match                                                                               |
| CA4294 | 1.0 | 1.0 | 1.0 | ERC1 complemer ethionine resistance pr orf19.6691     | 2610 CaIFA8                                                          | UNCLASSIFIED PROTEINS                                                                                   |
| CA4295 | 0.9 | 1.0 | 1.0 | MNN7 13579767..putative Golgi alpha-1, orf19.6692     | 2606 CaERC1                                                          | CELL RES molecular_function unknown                                                                     |
| CA4296 | 0.9 | 1.0 | 1.0 | IPF2605 complemer unknown function orf19.6693         | 2605 CaMNN7                                                          | CELL FATE                                                                                               |
| CA4297 | 0.9 | 0.9 | 0.9 | IPF2603 complemer unknown function orf19.6694         | 2603 IPF2605                                                         | UNCLASSI molecular_function unknown                                                                     |
| CA4298 | 1.0 | 1.0 | 1.0 | TIM9 complemer Mitochondrial inner me orf19.6696      | 2599 IPF2603                                                         | TRANSCRIPTION CELL FATE SUBCELLULAR LOCALISATION                                                        |
| CA4299 | 1.0 | 1.0 | 1.0 | IPF2598 complemer unknown function orf19.6698         | 2598 CaTIM9                                                          | PROTEIN I chaperone activity                                                                            |
| CA4300 | 1.0 | 0.9 | 1.0 | HIS2 13590854..Histidinol phosphatase orf19.6699      | 2596 IPF2598                                                         | PROTEIN I ligase activity                                                                               |
| CA4301 | 1.0 | 1.0 | 1.0 | IPF2593 complemer amino acid-tRNA ligasi orf19.6701   | 2593 CaHIS2                                                          | Amino acid hydrolase activity                                                                           |
| CA4302 | 1.0 | 1.2 | 1.0 | DED81 13594793..AsparaginyI-tRNA synt orf19.6702      | 2591 IPF2593                                                         | PROTEIN I ligase activity                                                                               |
| CA4303 | 1.0 | 1.0 | 1.1 | IFB1 13596937..unknown function orf19.6703            | 2590 CaDED81                                                         | PROTEIN I ligase activity                                                                               |

|        |     |     |     |           |                                              |            |                |                                                                                                                  |
|--------|-----|-----|-----|-----------|----------------------------------------------|------------|----------------|------------------------------------------------------------------------------------------------------------------|
| CA4304 | 1.0 | 1.1 | 1.1 | IPF6649   | 13599850..unknown function                   | orf19.6704 | 6649 CalFB1    | CELLULAR TRANSPORT AND TRANSPORT MECHANISMS SUBCELLULAR LOCALISATION                                             |
| CA4305 | 1.0 | 1.1 | 1.0 | IPF6654   | 13605657..unknown function                   | orf19.6705 | 6654 IPF6649   | CELL CYCLE AND DNA PROCESSING PROTEIN SYNTHESIS SUBCELLULAR LOCALISATION                                         |
| CA4306 | 0.9 | 0.9 | 0.9 | GYP7      | 13609552..GTPase activating protein          | orf19.6706 | 6656 IPF6654   | UNCLASSI molecular_function unknown                                                                              |
| CA4307 | 1.0 | 0.9 | 1.0 | IPF20013  | 13612322..Unknown function                   | orf19.6707 | 20013 CaGYP7   | CONTROL enzyme regulator activity                                                                                |
| CA4308 | 0.9 | 1.0 | 1.0 | IPF6660   | 13613872..unknown function                   | orf19.6708 | 6660 IPF20013  | PROTEIN hydrolase activity                                                                                       |
| CA4309 | 1.1 | 1.1 | 1.1 | IPF2127.3 | 13616446..unknown function, 3-pror           | orf19.4117 | 2127 IPF6660   | UNCLASSIFIED PROTEINS                                                                                            |
| CA4310 | 1.0 | 0.9 | 1.0 | IPF2125   | complemer unknown function                   | orf19.4116 | 2125 IPF2127.3 | No significant S.c. match                                                                                        |
| CA4311 | 0.9 | 0.8 | 0.9 | FAA23     | 13620672..Long-chain-fatty-acid--            | orf19.4114 | 2123 IPF2125   | UNCLASSIFIED PROTEINS                                                                                            |
| CA4312 | 1.1 | 1.1 | 1.0 | IPF2122   | complemer similar to thiamin pyrro           | orf19.4112 | 2122 CaFAA23   | Lipid fatty-acid and isoprenoid metabolism ""CELLULAR TRANSPORT AND TRANSPORT MECHANISMS SUBCELLULAR LOCALISATIC |
| CA4313 | 1.0 | 1.0 | 1.0 | IPF2121   | 13624191..unknown function                   | orf19.4110 | 2121 IPF2122   | Metabolism molecular_function unknown                                                                            |
| CA4314 | 1.0 | 1.1 | 1.1 | PMT4      | 13627689..Mannosyltransferase (lorf)         | orf19.4109 | 2115 IPF2121   | CELL CYCLE AND DNA PROCESSING SUBCELLULAR LOCALISATION                                                           |
| CA4315 | 1.0 | 1.0 | 1.0 | PPX1      | 13630268..Exopolyphosphatase (lorf)          | orf19.4107 | 2112 CaPMT4    | C-compour transferase activity                                                                                   |
| CA4316 | 1.0 | 1.0 | 1.0 | IPF2111   | complemer unknown function                   | orf19.4106 | 2111 CaPPX1    | Phosphate hydrolase activity                                                                                     |
| CA4317 | 1.1 | 1.1 | 1.1 | IPF2109   | 13632715..unknown function                   | orf19.4105 | 2109 IPF2111   | UNCLASSI molecular_function unknown                                                                              |
| CA4318 | 1.0 | 1.0 | 1.0 | IPF2106   | complemer unknown function                   | orf19.4104 | 2106 IPF2109   | UNCLASSI molecular_function unknown                                                                              |
| CA4319 | 1.0 | 1.0 | 1.2 | RPN10     | complemer Protein degradation (b)            | orf19.4102 | 2104 IPF2106   | No significant S.c. match                                                                                        |
| CA4320 | 1.0 | 1.1 | 1.0 | ECM17     | complemer Putative sulfite reducta           | orf19.4099 | 2102 CaRPN10   | PROTEIN l peptidase activity                                                                                     |
| CA4321 | 1.1 | 1.0 | 1.0 | KAR3.53   | 13639735..Kinesin-related protein            | orf19.4100 | 2100 CaECM17   | Amino acid transporter activity                                                                                  |
| CA4322 | 1.0 | 1.2 | 1.1 | IPF2097   | complemer unknown function                   | orf19.4097 | 2097 CaKAR3.5  | CELL CYC motor activity                                                                                          |
| CA4323 | 1.0 | 0.9 | 1.0 | IPF2096   | complemer putative acyltransferas            | orf19.4096 | 2096 IPF2097   | TRANSCRIPTION                                                                                                    |
| CA4324 | 1.1 | 1.0 | 1.0 | IPF2095   | complemer unknown function                   | orf19.4095 | 2095 IPF2096   | CLASSIFIC transferase activity                                                                                   |
| CA4325 | 1.1 | 1.1 | 1.0 | IPF2094   | 13646015..unknown function                   | orf19.4094 | 2094 IPF2095   | No significant S.c. match                                                                                        |
| CA4326 | 0.9 | 1.1 | 0.9 | IPF2093   | 13646785..nuclear protein of unkr            | orf19.4093 | 2093 IPF2094   | No significant S.c. match                                                                                        |
| CA4327 | 0.9 | 1.0 | 1.0 | IPF2091   | 13648774..unknown function                   | orf19.4092 | 2091 IPF2093   | UNCLASSI molecular_function unknown                                                                              |
| CA4328 | 0.9 | 1.0 | 0.9 | IPF2090   | complemer similar to Saccharomy              | orf19.4091 | 2090 IPF2091   | UNCLASSI molecular_function unknown                                                                              |
| CA4329 | 1.0 | 0.9 | 1.0 | VMA21     | complemer Vacuolar H+-ATPase assembly (b     |            | 2089 IPF2090   | TRANSCR transcription regulator activity                                                                         |
| CA4330 | 0.9 | 1.0 | 0.9 | IPF2087   | 13651418..unknown function                   | orf19.4090 | 2087 CaVMA21   | PROTEIN l molecular_function unknown                                                                             |
| CA4331 | 1.2 | 1.2 | 1.8 | IPF2086   | 13653176..unknown function                   | orf19.4089 | 2086 IPF2087   | UNCLASSIFIED PROTEINS                                                                                            |
| CA4332 | 1.1 | 1.1 | 1.1 | GLO2      | 13654688..Glyoxalase II (hydroxy             | orf19.4088 | 2085 IPF2086   | CELL CYC chaperone activity                                                                                      |
| CA4333 | 0.9 | 0.9 | 1.0 | IPF2083   | complemer unknown function                   | orf19.4086 | 2083 CaGLO2    | Amino acid hydrolase activity                                                                                    |
| CA4334 | 1.1 | 1.1 | 1.3 | IPF2082   | 13656458..unknown function                   | orf19.4085 | 2082 IPF2083   | UNCLASSI molecular_function unknown                                                                              |
| CA4335 | 0.8 | 0.9 | 1.0 | GAL83     | 13657376..Glucose repression pr              | orf19.4084 | 2079 IPF2082   | CELL RESCUE DEFENSE AND VIRULENCE ""TRANSPORT FACILITATION                                                       |
| CA4336 | 9.1 | 2.8 | 5.8 | DDR48     | complemer stress protein (by hom             | orf19.4082 | 2075 CaGAL83   | C-compour protein kinase activity                                                                                |
| CA4337 | 1.1 | 1.1 | 1.0 | IPF2071   | complemer unknown function                   | orf19.4079 | 2071 CaDDR48   | CELL RESCUE DEFENSE AND VIRULENCE ""UNCLASSIFIED PROTEINS                                                        |
| CA4338 | 1.1 | 1.1 | 1.0 | IPF3616   | 13666944..Unknown function                   | orf19.6709 | 3616 IPF2071   | No significant S.c. match                                                                                        |
| CA4339 | 1.2 | 1.2 | 1.2 | IPF3618   | complemer Unknown function                   | orf19.6710 | 3618 IPF3616   | UNCLASSI molecular_function unknown                                                                              |
| CA4340 | 1.4 | 1.4 | 1.0 | IPF3621   | complemer unknown function                   | orf19.6712 | 3621 IPF3618   | UNCLASSIFIED PROTEINS                                                                                            |
| CA4341 | 1.1 | 1.2 | 1.0 | IPF3624   | complemer unknown function                   | orf19.6713 | 3624 IPF3621   | CLASSIFIC molecular_function unknown                                                                             |
| CA4342 | 0.8 | 0.7 | 0.7 | IPF3629   | complemer RNA (guanine-N7-) me               | orf19.6716 | 3629 IPF3624   | No significant S.c. match                                                                                        |
| CA4343 | 1.2 | 1.1 | 1.2 | IPF3630   | complemer unknown function                   | orf19.6717 | 3630 IPF3629   | TRANSCR transferase activity                                                                                     |
| CA4344 | 1.1 | 1.1 | 1.1 | IPF3631   | 13680189..unknown function                   | orf19.6718 | 3631 IPF3630   | UNCLASSI molecular_function unknown                                                                              |
| CA4345 | 1.0 | 1.1 | 1.0 | IPF3633.3 | complemer similar to Saccharomy              | orf19.6719 | 3633 IPF3631   | No significant S.c. match                                                                                        |
| CA4346 | 1.2 | 1.3 | 1.5 | IPF3634   | complemer unknown function                   | orf19.6720 | 3634 IPF3633.3 | CELL CYC transcription regulator activity                                                                        |
| CA4347 | 1.0 | 0.9 | 0.9 | IPF3636   | complemer similar to Saccharomy              | orf19.6722 | 3636 IPF3634   | UNCLASSI molecular_function unknown                                                                              |
| CA4348 | 1.0 | 1.1 | 1.1 | IPF3638   | 13689201..unknown function                   | orf19.6723 | 3638 IPF3636   | CELL CYC DNA binding                                                                                             |
| CA4349 | 1.0 | 1.0 | 1.0 | FUM12.5F  | 13691337..Fumarate hydratase, 5              | orf19.6724 | 3640 IPF3638   | UNCLASSIFIED PROTEINS                                                                                            |
| CA4350 | 1.0 | 0.7 | 1.1 | FUM12.53l | 13692040..Fumarate hydratase, internal fragr |            | 18225 CaFUM12. | ENERGY SUBCELLULAR LOCALISATION                                                                                  |
| CA4351 | 0.9 | 1.0 | 0.9 | FUM12.3F  | 13692234..Fumarate hydratase, 3              | orf19.6725 | 3641 CaFUM12.  | ENERGY SUBCELLULAR LOCALISATION                                                                                  |
| CA4352 | 1.1 | 0.9 | 1.0 | IPF3642   | 13693048..Unknown function                   | orf19.6726 | 3642 CaFUM12.  | ENERGY SUBCELLULAR LOCALISATION                                                                                  |
| CA4353 | 1.1 | 1.0 | 1.2 | IPF3645   | 13694115..similar to Saccharomy              | orf19.6727 | 3645 IPF3642   | TRANSCR DNA binding                                                                                              |
| CA4354 | 1.0 | 1.1 | 1.0 | IPF3647   | complemer unknown function                   | orf19.6729 | 3647 IPF3645   | TRANSCR transferase activity                                                                                     |
| CA4355 | 1.0 | 1.1 | 1.0 | IPF3649   | complemer unknown function                   | orf19.6730 | 3649 IPF3647   | TRANSCRIPTION PROTEIN SYNTHESIS                                                                                  |
| CA4356 | 0.9 | 0.9 | 1.0 | IPF3651   | complemer unknown function                   |            | 3651 IPF3649   | UNCLASSI molecular_function unknown                                                                              |
| CA4357 | 0.9 | 0.9 | 0.9 | IPF19800  | 13701331..unknown function                   | orf19.6732 | 19800 IPF3651  | No significant S.c. match                                                                                        |
| CA4358 | 2.0 | 1.8 | 1.3 | IPF6067   | complemer putative transcription f           | orf19.6734 | 6067 IPF19800  | UNCLASSI molecular_function unknown                                                                              |
| CA4359 | 1.1 | 1.0 | 1.0 | IPF6054   | 13713281..unown function                     | orf19.6736 | 6054 IPF6067   | TRANSCRIPTION SUBCELLULAR LOCALISATION                                                                           |
| CA4360 | 1.1 | 0.9 | 1.0 | IPF6050   | 13717654..unknown function                   | orf19.6737 | 6050 IPF6054   | UNCLASSI molecular_function unknown                                                                              |
| CA4361 | 1.0 | 1.0 | 1.0 | IPF16104  | 13723251..unknown function                   | orf19.1309 | 16104 IPF6050  | No significant S.c. match                                                                                        |
| CA4362 | 0.6 | 0.8 | 0.5 | ATP2      | 13726192..F1F0-ATPase comple                 | orf19.5653 | 5264 IPF16104  | TRANSCR molecular_function unknown                                                                               |
| CA4363 | 1.1 | 1.1 | 1.1 | STE24     | 13728012..zinc metallo-protease l            | orf19.5654 | 5265 CaATP2    | ENERGY C transporter activity                                                                                    |
| CA4364 | 1.0 | 1.0 | 1.1 | IPF5268.E | complemer choline monooxygenas               | orf19.5655 | 5266 CaSTE24   | PROTEIN l peptidase activity                                                                                     |
| CA4365 | 1.0 | 0.9 | 0.9 | IPF5268.E | complemer choline monooxygenas               | orf19.5656 | 5268 IPF5268.e | No significant S.c. match                                                                                        |
| CA4366 | 1.0 | 1.0 | 0.9 | SWI1      | complemer Transcription regulatio            | orf19.5657 | 5271 IPF5268.e | No significant S.c. match                                                                                        |
| CA4367 | 1.0 | 1.0 | 1.0 | MNN10     | complemer galactosyltransferase (            | orf19.5658 | 5272 CaSWI1    | C-compour transcription regulator activity                                                                       |
| CA4368 | 1.1 | 1.0 | 1.0 | PEX10.3   | complemer peroxisomal assembly               | orf19.5660 | 5275 CaMNN10   | C-compour transferase activity                                                                                   |
| CA4369 | 1.0 | 1.1 | 1.1 | TIM11     | complemer subunit e of mitochondrial F1F0-A' |            | 5277 CaPEX10.3 | PROTEIN l protein binding                                                                                        |
| CA4370 | 1.0 | 1.2 | 1.0 | IPF5279   | 13737863..unknown function                   | orf19.5661 | 5279 CaTIM11   | ENERGY ""PROTEIN FATE [folding modification destination] ""CELLULAR TRANSPORT AND TRANSPORT MECHANISMS SUBCELLU  |
| CA4371 | 1.0 | 1.0 | 1.1 | PEP7      | 13739024..vacuolar segregation por           | orf19.5662 | 5281 IPF5279   | ENERGY E protein phosphatase activity                                                                            |
| CA4372 | 0.9 | 1.0 | 1.0 | IPF5282   | complemer unknown function                   | orf19.5663 | 5282 CaPEP7    | PROTEIN l molecular_function unknown                                                                             |
| CA4373 | 0.9 | 0.8 | 0.9 | IPF5287   | 13742925..signal transduction pro            | orf19.5664 | 5287 IPF5282   | UNCLASSI transporter activity                                                                                    |
| CA4374 | 1.0 | 1.0 | 0.9 | IPF5288   | 13744929..Unknown function                   | orf19.5665 | 5288 IPF5287   | CELL CYC protein binding                                                                                         |
| CA4375 | 1.1 | 1.1 | 1.1 | IPF11309  | 13746058..unknown function                   | orf19.5666 | 11309 IPF5288  | UNCLASSI molecular_function unknown                                                                              |

|        |     |     |     |           |                                             |            |       |           |                                                                                                             |
|--------|-----|-----|-----|-----------|---------------------------------------------|------------|-------|-----------|-------------------------------------------------------------------------------------------------------------|
| CA4376 | 0.9 | 0.9 | 1.0 | IPF11307  | 13747288..unknown function                  | orf19.5667 | 11307 | IPF11309  | TRANSCR transcription regulator activity                                                                    |
| CA4377 | 1.0 | 1.0 | 0.9 | IPF11301  | 13749902..unknown function                  | orf19.5669 | 11301 | IPF11307  | CELL RES transporter activity                                                                               |
| CA4378 | 0.9 | 0.8 | 0.9 | IPF11299  | complemer unknown function                  | orf19.5671 | 11299 | IPF11301  | SUBCELLULAR LOCALISATION                                                                                    |
| CA4379 | 0.6 | 0.4 | 0.9 | MEP2      | 13754336..high affinity low capaci          | orf19.5672 | 12738 | IPF11299  | UNCLASSI molecular_function unknown                                                                         |
| CA4380 | 0.8 | 0.7 | 0.9 | IPF12736  | complemer unknown function                  | orf19.5673 | 12736 | CaMEP2    | CELLULAR transporter activity                                                                               |
| CA4381 | 2.4 | 2.3 | 1.6 | IPF20169  | complemer unknown function                  | orf19.5674 | 20169 | IPF12736  | TRANSPORT FACILITATION                                                                                      |
| CA4382 | 1.0 | 1.0 | 1.1 | IPF8576   | complemer similar to Saccharomy             | orf19.5675 | 8576  | IPF20169  | No significant S.c. match                                                                                   |
| CA4383 | 1.0 | 0.9 | 1.0 | IPF8573   | complemer unknown function                  | orf19.1312 | 8573  | IPF8576   | UNCLASSI hydrolase activity                                                                                 |
| CA4384 | 1.0 | 1.1 | 1.0 | DUR34     | 13767917..Urea transport protein            | orf19.1312 | 8570  | IPF8573   | UNCLASSI molecular_function unknown                                                                         |
| CA4385 | 1.3 | 1.1 | 1.0 | CTC6      | complemer component of chaperone            | orf19.3126 | 14978 | CaDUR34   | REGULATION OF/INTERACTION WITH CELLULAR ENVIRONMENT SUBCELLULAR LOCALISATION TRANSPORT FACILITATION         |
| CA4386 | 0.9 | 0.9 | 0.9 | IPF12412  | 13777240..unknown function                  | orf19.3125 | 12412 | CaCTC6    | PROTEIN I chaperone activity                                                                                |
| CA4387 | 0.9 | 1.0 | 1.0 | MAP1      | complemer methionine aminopepti             | orf19.3124 | 12414 | IPF12412  | TRANSCRIPTION SUBCELLULAR LOCALISATION                                                                      |
| CA4388 | 1.0 | 0.9 | 1.1 | IPF12416  | complemer cytidine deaminase, 3-prime end ( |            | 12416 | CaMAP1    | PROTEIN I peptidase activity                                                                                |
| CA4389 | 0.8 | 0.7 | 1.0 | RPT5      | 13780287..26S proteasome regul              | orf19.3123 | 12419 | IPF12416  | Nucleotide hydrolase activity                                                                               |
| CA4390 | 1.0 | 1.1 | 1.1 | HOD1      | complemer regulator of G2/M progression (by |            | 12420 | CaRPT5    | PROTEIN I peptidase activity                                                                                |
| CA4391 | 0.9 | 0.8 | 0.9 | ARR3      | 13782944..involved in arsenite tra          | orf19.3122 | 12422 | CaHOD1    | No significant S.c. match                                                                                   |
| CA4392 | 1.0 | 1.0 | 0.9 | IPF12303  | 13784434..glutathione-S-transfera           | orf19.3121 | 12303 | CaARR3    | SUBCELLU transporter activity                                                                               |
| CA4393 | 1.0 | 1.0 | 1.0 | IPF12300  | 13785662..unknown function                  | orf19.3120 | 12300 | IPF12303  | Nitrogen and sulphur metabolism                                                                             |
| CA4394 | 1.1 | 1.1 | 1.2 | IPF12297  | complemer mycelial surface antigen          | orf19.3117 | 12297 | IPF12300  | TRANSPORT FACILITATION                                                                                      |
| CA4395 | 1.0 | 1.0 | 1.1 | EXM2      | complemer EXit with Mitosis (by h           | orf19.3116 | 12295 | IPF12297  | No significant S.c. match                                                                                   |
| CA4396 | 1.0 | 1.0 | 1.0 | IPF12294  | complemer unknown function                  | orf19.3115 | 12294 | CaEXM2    | TRANSCR RNA binding                                                                                         |
| CA4397 | 0.9 | 0.9 | 1.0 | IPF14369  | 13791307..unknown function                  | orf19.3114 | 14369 | IPF12294  | SUBCELLULAR LOCALISATION                                                                                    |
| CA4398 | 1.8 | 3.5 | 1.2 | ZRT1      | complemer high-affinity zinc transp         | orf19.3112 | 14367 | IPF14369  | Nucleotide lyase activity                                                                                   |
| CA4399 | 1.0 | 1.3 | 1.0 | PRA1      | 13794736..pH-regulated antigen              | orf19.3111 | 14364 | CaZRT1    | REGULATION OF/INTERACTION WITH CELLULAR ENVIRONMENT TRANSPORT FACILITATION                                  |
| CA4400 | 1.1 | 1.1 | 1.1 | IPF14362  | 13796197..unknown function                  | orf19.3110 | 8781  | CaPRA1    | UNCLASSI molecular_function unknown                                                                         |
| CA4401 | 1.0 | 1.0 | 1.1 | IPF8780   | 13798417..unknown function                  | orf19.3109 | 8780  | IPF14362  | UNCLASSIFIED PROTEINS                                                                                       |
| CA4402 | 1.0 | 1.0 | 1.0 | MGT1      | complemer O6-methylguanaine DN              | orf19.3108 | 8778  | IPF8780   | No significant S.c. match                                                                                   |
| CA4403 | 0.9 | 0.9 | 0.9 | IPF8777   | complemer unknown function                  | orf19.3107 | 8777  | CaMGT1    | CELL CYC DNA binding                                                                                        |
| CA4404 | 1.1 | 1.0 | 1.0 | MET16     | 13801316..3-phosphoadenylylsul              | orf19.3106 | 8775  | IPF8777   | No significant S.c. match                                                                                   |
| CA4405 | 1.1 | 1.0 | 0.9 | IPF8773   | 13802252..putative cytochrome P             | orf19.3105 | 8773  | CaMET16   | Amino acid oxidoreductase activity                                                                          |
| CA4406 | 1.1 | 0.9 | 1.0 | YDC1      | 13804150..alkaline dihydrocerami            | orf19.3104 | 8772  | IPF8773   | CELL RESCUE DEFENSE AND VIRULENCE ""CELL FATE CONTROL OF CELLULAR ORGANIZATION                              |
| CA4407 | 1.1 | 1.0 | 1.0 | RPO31     | 13805409..DNA-directed RNA pol              | orf19.3103 | 13155 | CaYDC1    | Lipid fatty-z hydrolase activity                                                                            |
| CA4408 | 0.9 | 0.9 | 0.9 | CTA6.3    | 13809882..unknown function, 3-pr            | orf19.3102 | 13152 | CaRPO31   | TRANSCR nucleotidyltransferase activity                                                                     |
| CA4409 | 1.0 | 1.0 | 1.0 | IPF13151  | complemer unknown function                  | orf19.3100 | 13151 | CaCTA6.3  | No significant S.c. match                                                                                   |
| CA4410 | 0.9 | 0.9 | 1.0 | TRP4      | complemer Anthranilate phosphori            | orf19.3099 | 1754  | IPF13151  | CELLULAR TRANSPORT AND TRANSPORT MECHANISMS SUBCELLULAR LOCALISATION                                        |
| CA4411 | 1.0 | 1.1 | 1.1 | BRR2      | complemer RNA helicase-related              | orf19.3098 | 1751  | CaTRP4    | Amino acid transferase activity                                                                             |
| CA4412 | 1.5 | 2.4 | 1.9 | PDA1      | complemer Pyruvate dehydrogena              | orf19.3097 | 1749  | CaBRR2    | TRANSCR RNA binding,helicase activity                                                                       |
| CA4413 | 1.0 | 0.9 | 1.2 | MSH2      | complemer DNA mismatch repair               | orf19.3093 | 1746  | CaPDA1    | C-compour oxidoreductase activity                                                                           |
| CA4415 | 0.9 | 0.8 | 1.2 | HIK1.3EOC | 13826051..histidine kinase, 3-prime end     |            | 11890 | CaMSH2    | CELL CYC DNA binding                                                                                        |
| CA4416 | 1.2 | 1.6 | 1.2 | IPF11888  | 13830957..unknown function                  | orf19.5180 | 11888 | CaHIK1.3e | CELL CYCLE AND DNA PROCESSING TRANSCRIPTION CELLULAR COMMUNICATION/SIGNAL TRANSDUCTION MECHANISM ""CE       |
| CA4417 | 1.0 | 0.9 | 1.0 | LIP5      | complemer Secretary lipase                  | orf19.5179 | 5395  | IPF11888  | CELL RES oxidoreductase activity                                                                            |
| CA4418 | 0.7 | 0.6 | 1.1 | ERG5      | complemer C-22 sterol desaturase            | orf19.5178 | 5398  | CaLIP5    | Other virulence attributes                                                                                  |
| CA4419 | 1.0 | 0.9 | 1.0 | IFA6      | 13840496..Unknown function                  | orf19.5177 | 5401  | CaERG5    | Lipid fatty-acid and isoprenoid metabolism """"CELL RESCUE DEFENSE AND VIRULENCE ""SUBCELLULAR LOCALISATION |
| CA4420 | 1.2 | 1.2 | 1.0 | SSM4      | complemer involved in mRNA turn             | orf19.5175 | 5404  | CaIFA6    | UNCLASSIFIED PROTEINS                                                                                       |
| CA4421 | 1.2 | 1.1 | 1.1 | TAF19     | complemer TBP-associated factor             | orf19.5174 | 5405  | CaSSM4    | TRANSCR ligase activity                                                                                     |
| CA4422 | 1.1 | 1.2 | 1.2 | LIP9.EXON | complemer secretory lipase 9, exo           | orf19.5173 | 5406  | CaTAF19   | TRANSCR transcription regulator activity                                                                    |
| CA4423 | 1.0 | 1.0 | 1.1 | LIP9.EXON | complemer secretory lipase 9, exo           | orf19.5172 | 5407  | CaLIP9.ex | Other virulence attributes                                                                                  |
| CA4424 | 1.1 | 1.0 | 1.1 | PMT1      | complemer mannosyltransferase               | orf19.5171 | 5408  | CaLIP9.ex | Other virulence attributes                                                                                  |
| CA4425 | 0.9 | 2.0 | 1.0 | ENA21.3   | 13855072..P-type ATPase, 3-prim             | orf19.5170 | 5411  | CaPMT1    | C-compour transferase activity                                                                              |
| CA4426 | 1.0 | 0.9 | 1.0 | AMD21     | 13858996..amidase (by homology              | orf19.5169 | 5587  | CaENA21.  | REGULATION OF/INTERACTION WITH CELLULAR ENVIRONMENT TRANSPORT FACILITATION                                  |
| CA4427 | 1.0 | 1.0 | 0.9 | IPF5584   | complemer unknown function                  | orf19.5168 | 5584  | CaAMD21   | Nitrogen and sulphur metabolism                                                                             |
| CA4428 | 1.2 | 1.1 | 1.1 | IFM1      | complemer translation initiation fac        | orf19.5167 | 5581  | IPF5584   | UNCLASSI molecular_function unknown                                                                         |
| CA4429 | 0.9 | 0.9 | 1.1 | DBF4      | complemer regulatory subunit for            | orf19.5166 | 5578  | CaIFM1    | PROTEIN ;RNA binding                                                                                        |
| CA4430 | 1.1 | 1.0 | 1.0 | IPF5577   | complemer unknown function                  | orf19.5165 | 5577  | CaDBF4    | CELL CYC protein kinase activity                                                                            |
| CA4431 | 1.0 | 0.9 | 1.0 | ECM39     | 13868170..cell wall biogenesis by           | orf19.5164 | 5575  | IPF5577   | UNCLASSI molecular_function unknown                                                                         |
| CA4432 | 0.8 | 0.2 | 0.9 | IPF5574   | complemer unknown function                  | orf19.5163 | 5574  | CaECM39   | CONTROL transferase activity                                                                                |
| CA4433 | 0.9 | 0.9 | 1.0 | BCK1      | 13873674..serine/threonine protei           | orf19.5162 | 5572  | IPF5574   | CELL CYC molecular_function unknown                                                                         |
| CA4434 | 0.9 | 1.0 | 1.0 | MRPL49    | complemer ribosomal protein mitox           | orf19.5161 | 5569  | CaBCK1    | CELL CYC protein kinase activity,signal transducer activity                                                 |
| CA4435 | 0.9 | 0.9 | 0.8 | SAP190    | 13879174..phosphatase associate             | orf19.5160 | 5567  | CaMRPL4   | PROTEIN ;structural molecule activity                                                                       |
| CA4436 | 1.0 | 1.1 | 1.0 | IPF13868  | complemer unknown function                  | orf19.5159 | 13868 | CaSAP190  | CELL CYC protein phosphatase activity                                                                       |
| CA4437 | 1.2 | 1.5 | 1.8 | IPF13867  | 13883597..unknown function                  | orf19.5158 | 13867 | IPF13868  | UNCLASSI molecular_function unknown                                                                         |
| CA4438 | 1.0 | 0.9 | 0.9 | IPF13866  | 13884332..unknown function                  | orf19.5157 | 13866 | IPF13867  | CELLULAR TRANSPORT AND TRANSPORT MECHANISMS SUBCELLULAR LOCALISATION                                        |
| CA4439 | 1.0 | 1.1 | 1.0 | IPF13865  | 13885085..unknown function                  | orf19.5156 | 13865 | IPF13866  | UNCLASSIFIED PROTEINS                                                                                       |
| CA4440 | 1.0 | 1.0 | 0.9 | IPF13864  | complemer similar to Saccharomy             | orf19.5155 | 13864 | IPF13865  | UNCLASSI molecular_function unknown                                                                         |
| CA4441 | 1.2 | 1.2 | 1.0 | IPF2268.3 | complemer unknown function, 3-prime end     |            | 2268  | IPF13864  | C-compour molecular_function unknown                                                                        |
| CA4442 | 1.0 | 1.0 | 0.9 | IPF3537   | complemer unknown function                  | orf19.6838 | 3537  | IPF2268.3 | No significant S.c. match                                                                                   |
| CA4443 | 0.9 | 1.0 | 1.1 | IPF3535   | complemer unknown function                  | orf19.6840 | 3535  | IPF3537   | ENERGY SUBCELLULAR LOCALISATION                                                                             |
| CA4444 | 1.0 | 1.0 | 1.0 | IPF3533   | complemer putative GDP/GTP exc              | orf19.6842 | 3533  | IPF3535   | No significant S.c. match                                                                                   |
| CA4445 | 1.0 | 0.7 | 0.9 | IPF3530   | 13913089..unknown function                  | orf19.6843 | 3530  | IPF3533   | UNCLASSI enzyme regulator activity                                                                          |
| CA4446 | 0.4 | 0.8 | 0.4 | ICL1      | 13915305..isocitrate lyase                  | orf19.6844 | 3527  | IPF3530   | No significant S.c. match                                                                                   |
| CA4447 | 1.0 | 1.0 | 1.0 | IPF3523   | 13917397..unknown function                  | orf19.6845 | 3523  | CaICL1    | C-compour lyase activity                                                                                    |
| CA4448 | 0.9 | 0.9 | 1.0 | PHO85     | complemer Negative regulator of F           | orf19.6846 | 3522  | IPF3523   | UNCLASSIFIED PROTEINS                                                                                       |

|        |     |     |     |           |                                         |            |                |                                                                                                                   |
|--------|-----|-----|-----|-----------|-----------------------------------------|------------|----------------|-------------------------------------------------------------------------------------------------------------------|
| CA4449 | 0.9 | 0.9 | 0.9 | IPF3520   | complemer unknown function              | orf19.6847 | 3520 CaPHO85   | Phosphate protein kinase activity                                                                                 |
| CA4450 | 1.1 | 0.9 | 1.0 | IPF3518   | complemer similar to Saccharomy         | orf19.6848 | 3518 IPF3520   | UNCLASSI molecular_function unknown                                                                               |
| CA4451 | 1.0 | 1.0 | 1.0 | ELC1      | 13925378..Transcription elongatio       | orf19.6849 | 3516 IPF3518   | PROTEIN I molecular_function unknown                                                                              |
| CA4452 | 1.0 | 0.9 | 1.0 | IPF3514   | 13926226.. unknown function             | orf19.6850 | 3514 CaELC1    | CELL CYC transcription regulator activity                                                                         |
| CA4453 | 1.0 | 1.0 | 1.1 | CHL4      | complemer chromosome segregat           | orf19.6851 | 15162 IPF3514  | UNCLASSI molecular_function unknown                                                                               |
| CA4454 | 0.9 | 0.9 | 1.1 | IPF15160  | complemer unknown function              | orf19.6852 | 15160 CaCHL4   | CELL CYC DNA binding                                                                                              |
| CA4455 | 1.0 | 1.0 | 1.1 | IPF8454   | complemer unknown function              | orf19.6853 | 8454 IPF15160  | UNCLASSI molecular_function unknown                                                                               |
| CA4456 | 1.1 | 1.1 | 1.1 | ATP1.EXO  | 13935906..F1F0-ATPase complex, F1 alpha | orf19.6854 | 8458 IPF8454   | No significant S.c. match                                                                                         |
| CA4457 | 0.8 | 1.5 | 0.5 | ATP1.EXO  | 13936228..F1F0-ATPase complex           | orf19.6854 | 8460 CaATP1.ex | ENERGY CELLULAR TRANSPORT AND TRANSPORT MECHANISMS REGULATION OF/INTERACTION WITH CELLULAR ENVIRONM               |
| CA4458 | 0.7 | 0.5 | 1.0 | IPF8464   | 13938534.. unknown function             | orf19.6855 | 8464 CaATP1.ex | ENERGY C transporter activity                                                                                     |
| CA4459 | 0.9 | 1.0 | 0.9 | NSP49.3F  | complemer nucleoporin, 3-prime e        | orf19.6856 | 8467 IPF8464   | No significant S.c. match                                                                                         |
| CA4460 | 0.9 | 0.9 | 0.9 | NSP49.5F  | complemer nuclear pore protein, 5       | orf19.6857 | 8469 CaNSP49.  | TRANSSCR structural molecule activity                                                                             |
| CA4461 | 1.0 | 1.0 | 0.9 | IPF8470   | complemer unknown function              | orf19.6858 | 8470 CaNSP49.  | No significant S.c. match                                                                                         |
| CA4462 | 0.9 | 0.9 | 1.0 | IPF17251  | complemer unknown function              | orf19.6859 | 17251 IPF8470  | UNCLASSI molecular_function unknown                                                                               |
| CA4463 | 1.0 | 1.0 | 1.0 | PIS1      | 13947475.. CDP diacylglycerol--in       | orf19.6860 | 9827 IPF17251  | No significant S.c. match                                                                                         |
| CA4464 | 1.1 | 1.0 | 1.1 | IPF9828   | complemer similar to Saccharomy         | orf19.6861 | 9828 CaPIS1    | Lipid fatty-z transferase activity                                                                                |
| CA4465 | 0.9 | 0.9 | 0.9 | IPF9829   | complemer unknown function              | orf19.6862 | 9829 IPF9828   | CELL CYC protein binding                                                                                          |
| CA4466 | 1.2 | 1.3 | 1.1 | VPH1      | complemer H+-ATPase V0 domain           | orf19.6863 | 9830 IPF9829   | UNCLASSI molecular_function unknown                                                                               |
| CA4467 | 1.0 | 1.0 | 1.0 | IPF9833   | 13957835.. unknown function             | orf19.6864 | 9833 CaVPH1    | PROTEIN I transporter activity                                                                                    |
| CA4468 | 0.9 | 0.9 | 0.8 | TOR2.53E1 | 13960608.. phosphatidylinositol 3-l     | orf19.1905 | 9721 IPF9833   | No significant S.c. match                                                                                         |
| CA4469 | 0.9 | 1.0 | 0.9 | TOR2.3F   | 13962745.. phosphatidylinositol 3-l     | orf19.1903 | 9719 CaTOR2.5  | Lipid fatty-acid and isoprenoid metabolism ""CELL CYCLE AND DNA PROCESSING CELLULAR COMMUNICATION/SIGNAL TRANSDUC |
| CA4470 | 1.0 | 1.0 | 1.0 | IPF9717   | 13967770.. unknown function             | orf19.1902 | 9717 CaTOR2.3l | Lipid fatty-z protein binding                                                                                     |
| CA4471 | 1.0 | 1.1 | 1.0 | MCM3      | 13969807.. replication initiation prc   | orf19.1901 | 9716 IPF9717   | UNCLASSI molecular_function unknown                                                                               |
| CA4472 | 1.0 | 1.0 | 1.0 | IPF6444   | 13972714.. putative methyltransfer      | orf19.1900 | 6444 CaMCM3    | CELL CYC DNA binding                                                                                              |
| CA4473 | 1.0 | 0.9 | 1.0 | IPF6447   | 13974538.. unknown function             | orf19.1897 | 6447 IPF6444   | UNCLASSI transferase activity                                                                                     |
| CA4474 | 0.8 | 0.9 | 0.8 | SSC1      | 13976149.. Mitochondrial heat sho       | orf19.1896 | 6450 IPF6447   | UNCLASSIFIED PROTEINS                                                                                             |
| CA4475 | 1.2 | 1.2 | 1.0 | IPF6455   | complemer unknown function              | orf19.1893 | 6455 CaSSC1    | PROTEIN I enzyme regulator activity                                                                               |
| CA4476 | 1.4 | 1.0 | 1.5 | 01-Apr    | complemer aspartyl protease             | orf19.1891 | 6456 IPF6455   | No significant S.c. match                                                                                         |
| CA4477 | 0.9 | 1.1 | 1.0 | IPF6459   | 13983877.. unknown function             | orf19.1890 | 6459 CaAPR1    | PROTEIN I peptidase activity                                                                                      |
| CA4478 | 1.1 | 1.1 | 1.1 | IPF6461   | 13985699.. unknown function             | orf19.1889 | 6461 IPF6459   | UNCLASSI molecular_function unknown                                                                               |
| CA4479 | 1.1 | 1.1 | 1.1 | URH1      | complemer Uridine ribohydrolase         | orf19.1888 | 6462 IPF6461   | C-compour molecular_function unknown                                                                              |
| CA4480 | 1.0 | 0.9 | 1.0 | IPF6464   | complemer putative triacylglycerol      | orf19.1887 | 6464 CaURH1    | Nucleotide hydrolase activity                                                                                     |
| CA4481 | 1.0 | 1.0 | 1.0 | IPF9150   | 13992547.. similar to Saccharomy        | orf19.9441 | 9150 IPF6464   | Lipid fatty-z molecular_function unknown                                                                          |
| CA4482 | 1.0 | 1.0 | 1.0 | IPF9154   | 13993921.. similar to Saccharomy        | orf19.1883 | 9154 IPF9150   | PROTEIN I transcription regulator activity                                                                        |
| CA4483 | 1.1 | 1.1 | 1.1 | IPF9156   | 13997689.. unknown function             | orf19.1881 | 9156 IPF9154   | SUBCELLI molecular_function unknown                                                                               |
| CA4484 | 1.0 | 1.0 | 1.0 | HEM15     | 14000215.. ferrocyclatase precurs       | orf19.1880 | 9158 IPF9156   | UNCLASSI molecular_function unknown                                                                               |
| CA4485 | 0.9 | 0.9 | 1.0 | IPF9160   | complemer similar to Saccharomy         | orf19.1878 | 9160 CaHEM15   | Metabolism lyase activity                                                                                         |
| CA4486 | 1.0 | 1.0 | 1.0 | IPF9162   | 14002693.. unknown function             | orf19.1877 | 9162 IPF9160   | TRANSSCR transcription regulator activity                                                                         |
| CA4487 | 1.0 | 0.9 | 0.9 | IPF4039   | complemer similar to Saccharomy         | orf19.1876 | 4039 IPF9162   | UNCLASSI molecular_function unknown                                                                               |
| CA4488 | 0.9 | 0.9 | 1.0 | MEK1.3F   | complemer serine/threonine protei       | orf19.1875 | 4041 IPF4039   | CELL CYC RNA binding                                                                                              |
| CA4490 | 0.8 | 0.9 | 0.7 | IPF4045   | complemer unknown function              | orf19.9428 | 4045 CaMEK1.3  | CELL CYC protein kinase activity                                                                                  |
| CA4491 | 1.1 | 1.1 | 1.0 | SWR1      | 14009069.. putative DNA helicase        | orf19.9427 | 4050 IPF4045   | No significant S.c. match                                                                                         |
| CA4492 | 1.0 | 0.9 | 1.1 | RNR22     | 14015299.. ribonucleoside-diphosph      | orf19.1868 | 4053 CaSWR1    | TRANSSCR helicase activity                                                                                        |
| CA4493 | 1.0 | 1.0 | 1.0 | IPF4055   | 14016968.. unknown function             | orf19.1867 | 4055 CaRNR22   | Nucleotide metabolism CELL CYCLE AND DNA PROCESSING SUBCELLULAR LOCALISATION                                      |
| CA4494 | 1.2 | 1.2 | 1.2 | VMA1      | 14018455.. vacuolar ATPase V1 d         | orf19.1866 | 4056 IPF4055   | CELL RESCUE DEFENSE AND VIRULENCE ""SUBCELLULAR LOCALISATION                                                      |
| CA4495 | 1.1 | 1.1 | 1.1 | IPF4059   | complemer aldehyde dehydrogena          | orf19.1865 | 4059 CaVMA1    | No significz transporter activity                                                                                 |
| CA4496 | 1.2 | 1.2 | 1.1 | IPF4062   | complemer unknown function              | orf19.9420 | 4062 IPF4059   | ENERGY C molecular_function unknown                                                                               |
| CA4497 | 1.1 | 1.1 | 1.0 | IPF4064   | 14023894.. unknown function             | orf19.9419 | 4064 IPF4062   | UNCLASSI molecular_function unknown                                                                               |
| CA4498 | 0.8 | 0.6 | 0.9 | IPF11315  | 14026958.. unknown function             | orf19.8143 | 11315 IPF4064  | No significant S.c. match                                                                                         |
| CA4499 | 1.0 | 1.0 | 1.0 | IPF11316  | complemer unknown function              | orf19.511  | 11316 IPF11315 | CELLULAF molecular_function unknown                                                                               |
| CA4500 | 0.9 | 0.9 | 1.0 | IPF11319  | 14033050.. unknown function             | orf19.8141 | 11319 IPF11316 | UNCLASSI molecular_function unknown                                                                               |
| CA4501 | 1.0 | 1.1 | 1.0 | QDR1      | 14035767.. putative antibiotic resis    | orf19.8138 | 16422 IPF11319 | UNCLASSIFIED PROTEINS                                                                                             |
| CA4502 | 0.9 | 1.1 | 1.0 | IPF10391  | complemer Similar to dnaJ protein       | orf19.8136 | 10391 CaQDR1   | CELL RES transporter activity                                                                                     |
| CA4503 | 1.1 | 1.0 | 1.0 | SRV2      | complemer adenylate cyclase-ass         | orf19.505  | 10389 IPF10391 | CELL CYC enzyme regulator activity                                                                                |
| CA4504 | 0.9 | 0.9 | 0.9 | ARP5      | 14041534.. actin-related protein        | orf19.504  | 10388 CaSRV2   | CELLULAF protein binding                                                                                          |
| CA4505 | 1.0 | 1.2 | 1.0 | NOP2      | complemer nucleolar protein (b          | orf19.501  | 15042 CaARP5   | SUBCELLI molecular_function unknown                                                                               |
| CA4506 | 1.0 | 1.0 | 1.0 | GCD10     | 14046116.. translation initiation fac   | orf19.500  | 15038 CaNOP2   | TRANSSCR transferase activity                                                                                     |
| CA4507 | 1.0 | 1.0 | 0.9 | IPF20015  | complemer unknown function              | orf19.499  | 20015 CaGCD10  | PROTEIN I transferase activity                                                                                    |
| CA4508 | 1.0 | 1.2 | 1.0 | NAM9      | complemer mitochondrial ribosom         | orf19.498  | 8974 IPF20015  | UNCLASSI transferase activity                                                                                     |
| CA4509 | 0.9 | 1.0 | 1.0 | IPF8973   | 14050477.. unknown function             | orf19.497  | 8973 CaNAM9    | PROTEIN I structural molecule activity                                                                            |
| CA4510 | 1.1 | 1.1 | 1.1 | IPF8970   | 14052090.. similar to Saccharomy        | orf19.496  | 8970 IPF8973   | UNCLASSI molecular_function unknown                                                                               |
| CA4511 | 1.0 | 1.0 | 1.0 | IPF8966   | complemer unknown function              | orf19.8124 | 8966 IPF8970   | CELL CYCLE AND DNA PROCESSING SUBCELLULAR LOCALISATION                                                            |
| CA4512 | 1.2 | 2.2 | 1.6 | RPL15B    | 14057436.. ribosomal protein L15.       | orf19.8123 | 8963 IPF8966   | UNCLASSI transporter activity, RNA binding                                                                        |
| CA4513 | 1.6 | 1.8 | 1.2 | ADE17     | 14058839.. 5-aminoimidazole-4-ca        | orf19.492  | 14907 CaRPL15B | PROTEIN I RNA binding                                                                                             |
| CA4514 | 0.6 | 0.4 | 1.0 | IPF20016  | 14061041.. similar to Saccharomy        | orf19.491  | 20016 CaADE17  | Nucleotide hydrolase activity                                                                                     |
| CA4515 | 0.8 | 0.8 | 0.9 | IPF16652  | complemer unknown function              | orf19.490  | 16652 IPF20016 | PROTEIN I transporter activity                                                                                    |
| CA4516 | 1.2 | 1.1 | 1.2 | IPF18207  | 14064587.. unknown function             | orf19.489  | 18207 IPF16652 | UNCLASSI transferase activity                                                                                     |
| CA4517 | 1.0 | 1.0 | 1.0 | MEX67     | 14065491.. poly(A)+RNA binding p        | orf19.488  | 7086 IPF18207  | UNCLASSI molecular_function unknown                                                                               |
| CA4518 | 1.1 | 1.0 | 1.1 | SPT14     | 14067741.. N-acetylglucosaminy          | orf19.487  | 7087 CaMEX67   | TRANSSCR protein binding, RNA binding                                                                             |
| CA4519 | 1.0 | 1.0 | 1.0 | IPF7088   | complemer similar to Saccharomy         | orf19.486  | 7088 CaSPT14   | C-compour transferase activity                                                                                    |
| CA4520 | 1.0 | 1.0 | 1.1 | CDC31     | 14071993.. spindle pole body com        | orf19.485  | 7089 IPF7088   | CELL CYC protein binding                                                                                          |
| CA4521 | 1.0 | 1.1 | 1.0 | MRPL40    | 14073012.. Putative mitochondrial       | orf19.484  | 7091 CaCDC31   | CELL CYC structural molecule activity                                                                             |

|        |     |     |     |           |                                                |            |                 |                                                                                                                  |
|--------|-----|-----|-----|-----------|------------------------------------------------|------------|-----------------|------------------------------------------------------------------------------------------------------------------|
| CA4522 | 1.1 | 1.0 | 1.0 | RPT4      | complemer 26S proteasome regul                 | orf19.482  | 7093 CaMRPL4    | (PROTEIN 'structural molecule activity                                                                           |
| CA4523 | 1.1 | 1.1 | 1.0 | GCD1      | 14075715..translation initiation fac           | orf19.481  | 7094 CaRPT4     | TRANSCR peptidase activity                                                                                       |
| CA4524 | 1.0 | 1.0 | 1.0 | IPF7097   | complemer unknown function                     | orf19.480  | 7097 CaGCD1     | SUBCELLL translation regulator activity                                                                          |
| CA4525 | 1.1 | 1.0 | 1.1 | SEC22     | 14078810..synaptobrevin-type protein transp    |            | 7098 IPF7097    | UNCLASSI molecular_function unknown                                                                              |
| CA4526 | 0.9 | 0.9 | 1.0 | MON1.3    | 14079483..unknown function, 3-pr               | orf19.8109 | 7100 CaSEC22    | CELLULAF transporter activity                                                                                    |
| CA4527 | 1.0 | 1.1 | 1.0 | IPF4398   | 14082622..unknown function                     | orf19.9054 | 4398 CaMON1.3   | UNCLASSI molecular_function unknown                                                                              |
| CA4528 | 1.0 | 1.1 | 1.3 | STT3      | 14085326..oligosaccharyl transfer              | orf19.1478 | 4396 IPF4398    | UNCLASSIFIED PROTEINS                                                                                            |
| CA4529 | 0.8 | 0.9 | 0.8 | IPF4395   | 14088050..unknown function                     | orf19.1477 | 4395 CaSTT3     | C-compour transferase activity                                                                                   |
| CA4530 | 1.0 | 0.9 | 1.0 | IME4      | complemer positive transcription fa            | orf19.1476 | 4394 IPF4395    | UNCLASSI molecular_function unknown                                                                              |
| CA4531 | 0.9 | 1.0 | 0.9 | SLA1      | complemer cytoskeleton assembly                | orf19.1474 | 4392 CaIME4     | TRANSCR transferase activity                                                                                     |
| CA4532 | 0.9 | 0.9 | 0.9 | IPF4386   | complemer unknown function                     | orf19.1473 | 4386 CaSLA1     | PROTEIN I protein binding                                                                                        |
| CA4533 | 1.0 | 1.6 | 0.7 | COX4      | complemer cytochrome-c oxidase                 | orf19.1471 | 20017 IPF4386   | CLASSIFICATION NOT YET CLEAR-CUT                                                                                 |
| CA4534 | 1.5 | 1.4 | 2.1 | RPS26A    | 14098607..ribosomal protein S26.               | orf19.1470 | 4380 CaCOX4     | ENERGY ε oxidoreductase activity                                                                                 |
| CA4535 | 0.9 | 1.0 | 1.0 | CDC55     | 14100236..B subunit of protein ph              | orf19.1468 | 4377 CaRPS26A   | PROTEIN 'structural molecule activity                                                                            |
| CA4536 | 0.7 | 0.8 | 0.8 | COX13     | complemer cytochrome-c oxidase                 | orf19.1467 | 4376 CaCDC55    | CELL CYC protein phosphatase activity                                                                            |
| CA4537 | 1.0 | 0.9 | 1.0 | YNT2      | complemer suppressor of ma12/yr                | orf19.1466 | 4375 CaCOX13    | ENERGY ε enzyme regulator activity                                                                               |
| CA4538 | 1.0 | 0.9 | 1.0 | IPF20018  | complemer unknown function                     | orf19.1465 | 20018 CaYNT2    | TRANSCR hydrolase activity                                                                                       |
| CA4539 | 1.0 | 1.0 | 1.0 | IFQ4      | complemer Unknown function                     | orf19.1464 | 6260 IPF20018   | UNCLASSIFIED PROTEINS                                                                                            |
| CA4540 | 1.1 | 1.2 | 1.1 | SMP2      | complemer Involved in plasmid ma               | orf19.1462 | 6259 CaIFQ4     | UNCLASSIFIED PROTEINS                                                                                            |
| CA4541 | 0.5 | 0.7 | 0.4 | IPF6257   | complemer unknown function                     | orf19.1461 | 6257 CaSMP2     | ENERGY C molecular_function unknown                                                                              |
| CA4542 | 1.0 | 1.1 | 0.9 | IPF6255   | 14111834..unknown function                     | orf19.1460 | 6255 IPF6257    | No significant S.c. match                                                                                        |
| CA4543 | 1.1 | 0.9 | 0.9 | PPE1      | complemer Ribosomal protein of t               | orf19.1459 | 6254 IPF6255    | UNCLASSI hydrolase activity                                                                                      |
| CA4544 | 1.0 | 0.9 | 1.0 | IPF6252   | 14115326..similar to Saccharomy                | orf19.1458 | 6252 CaPPE1     | PROTEIN 'hydrolase activity                                                                                      |
| CA4545 | 0.9 | 1.0 | 1.0 | SSL1      | 14116432..TFIIH subunit (transcri              | orf19.1457 | 6250 IPF6252    | TRANSCR hydrolase activity                                                                                       |
| CA4546 | 0.9 | 1.0 | 0.8 | SPT5      | complemer Transcription elongatio              | orf19.1453 | 6247 CaSSL1     | CELL CYC transcription regulator activity                                                                        |
| CA4547 | 1.0 | 1.0 | 1.0 | SRB9      | complemer DNA-directed RNA pol                 | orf19.1451 | 6242 CaSPT5     | CELL CYC transcription regulator activity                                                                        |
| CA4548 | 1.0 | 1.0 | 1.0 | IPF7862   | 14126680..unknown function                     | orf19.1450 | 7862 CaSRB9     | C-compour transcription regulator activity                                                                       |
| CA4549 | 0.9 | 0.9 | 0.9 | IPF7863   | 14128068..unknown function                     | orf19.1449 | 7863 IPF7862    | PROTEIN FATE [folding modification destination]                                                                  |
| CA4550 | 0.9 | 0.9 | 1.0 | DYN2.3    | 14129143..Dynein light chain 1, cytosolic, 3-p |            | 7865 IPF7863    | Nitrogen ar molecular_function unknown                                                                           |
| CA4551 | 1.0 | 1.0 | 1.0 | APT1      | complemer adenine phosphoribosyl               | orf19.1448 | 7867 CaDYN2.3   | CELLULAF motor activity                                                                                          |
| CA4552 | 1.0 | 1.0 | 1.0 | IPF7869   | 14130639..unknown function                     | orf19.1447 | 7869 CaAPT1     | Nucleotide transferase activity                                                                                  |
| CA4553 | 1.0 | 1.0 | 1.0 | CYB1      | 14136327..G2/Mitotic-specific cyc              | orf19.1446 | 7873 IPF7869    | CONTROL OF CELLULAR ORGANIZATION                                                                                 |
| CA4554 | 0.9 | 1.0 | 1.0 | IPF7874   | 14138304..similar to Saccharomy                | orf19.1445 | 7874 CaCYB1     | CELL CYC protein kinase activity,enzyme regulator activity                                                       |
| CA4555 | 1.1 | 1.3 | 1.2 | IPF17555  | complemer unknown function, 3-pr               | orf19.9019 | 17555 IPF7874   | TRANSCR molecular_function unknown                                                                               |
| CA4556 | 0.9 | 1.2 | 1.1 | IPF8044   | complemer similar to Saccharomy                | orf19.6866 | 8044 IPF17555   | CELLULAF protein binding                                                                                         |
| CA4557 | 0.9 | 1.0 | 1.0 | IPF8043   | 14144722..unknown function                     | orf19.6867 | 8043 IPF8044    | TRANSCR RNA binding                                                                                              |
| CA4558 | 0.9 | 0.5 | 1.0 | GRP5      | 14145467..dihydroflavonol-4-redu               | orf19.6868 | 8042 IPF8043    | UNCLASSIFIED PROTEINS                                                                                            |
| CA4559 | 1.1 | 1.0 | 1.1 | IPF8041   | complemer putative mitochondrial               | orf19.6869 | 8041 CaGRP5     | Metabolism of vitamins cofactors and prosthetic groups                                                           |
| CA4560 | 0.9 | 0.9 | 0.9 | IPF8038   | 14150732..unknown function                     | orf19.6871 | 8038 IPF8041    | PROTEIN FATE [folding modification destination] ""SUBCELLULAR LOCALISATION                                       |
| CA4561 | 1.0 | 0.9 | 0.9 | IPF8031   | complemer unknown function                     | orf19.6872 | 8031 IPF8038    | UNCLASSI molecular_function unknown                                                                              |
| CA4562 | 2.0 | 1.3 | 1.5 | RPS8A     | complemer ribosomal protein (by h              | orf19.6873 | 6565 IPF8031    | SUBCELLL molecular_function unknown                                                                              |
| CA4563 | 0.9 | 0.9 | 1.0 | IPF6566   | 14158941..unknown function                     |            | 6566 CaRPS8A    | PROTEIN 'structural molecule activity                                                                            |
| CA4564 | 0.7 | 0.5 | 1.0 | IPF6572   | 14165740..unknown function                     | orf19.6874 | 6572 IPF6566    | UNCLASSI molecular_function unknown                                                                              |
| CA4565 | 0.7 | 0.6 | 0.8 | VPS35     | 14168313..Protein-sorting protein,             | orf19.6875 | 6573 IPF6572    | CELL CYCLE AND DNA PROCESSING                                                                                    |
| CA4566 | 1.4 | 1.7 | 1.1 | IPF19801  | 14172755..unknown function                     | orf19.6877 | 19801 CaVPS35   | PROTEIN I molecular_function unknown                                                                             |
| CA4567 | 1.0 | 0.9 | 1.0 | IPF9555   | complemer unknown function                     | orf19.6879 | 9555 IPF19801   | No significant S.c. match                                                                                        |
| CA4568 | 1.0 | 1.1 | 1.0 | IPF9554   | 14177046..unknown function                     | orf19.6880 | 9554 IPF9555    | TRANSCR RNA binding                                                                                              |
| CA4569 | 0.9 | 1.0 | 1.0 | IPF9552   | complemer unknown function                     | orf19.6881 | 9552 IPF9554    | UNCLASSI molecular_function unknown                                                                              |
| CA4570 | 3.3 | 2.4 | 2.1 | IPF9550   | 14181143..similar to Saccharomy                | orf19.6882 | 9550 IPF9552    | TRANSCR RNA binding                                                                                              |
| CA4571 | 1.0 | 1.2 | 1.1 | RPL33.3   | complemer ribosomal protein L35a, 3-prime      | orf19.6883 | 9548 IPF9550    | ENERGY " oxidoreductase activity                                                                                 |
| CA4572 | 1.2 | 1.1 | 1.1 | KES1      | complemer involved in ergosterol t             | orf19.6883 | 9434 CaRPL33.3  | PROTEIN 'structural molecule activity                                                                            |
| CA4573 | 1.1 | 1.0 | 1.0 | IPF9431   | complemer unknown function                     | orf19.6884 | 9431 CaKES1     | Lipid fatty-acid and isoprenoid metabolism ""CELLULAR TRANSPORT AND TRANSPORT MECHANISMS SUBCELLULAR LOCALISATIC |
| CA4574 | 1.0 | 1.0 | 1.0 | IPF9430   | 14188237..similar to Saccharomy                | orf19.6885 | 9430 IPF9431    | UNCLASSI molecular_function unknown                                                                              |
| CA4575 | 0.9 | 0.9 | 0.9 | IPF9428   | 14190289..unknown function                     | orf19.6886 | 9428 IPF9430    | CELL CYC molecular_function unknown                                                                              |
| CA4576 | 1.0 | 0.9 | 0.9 | IPF9425.3 | 14194146..unknown function, 3-pr               | orf19.6888 | 9425 IPF9428    | UNCLASSI molecular_function unknown                                                                              |
| CA4577 | 1.1 | 1.3 | 1.0 | MKK2      | complemer Protein kinase of MEK                | orf19.6889 | 14309 IPF9425.3 | No significant S.c. match                                                                                        |
| CA4578 | 0.9 | 0.9 | 1.0 | RFC1      | complemer DNA replication factor               | orf19.6891 | 14308 CaMKK2    | CELL CYC protein kinase activity                                                                                 |
| CA4579 | 1.0 | 0.9 | 1.0 | IPF2234   | 14220274..unknown function                     | orf19.6898 | 2234 CaRFC1     | CELL CYCLE AND DNA PROCESSING SUBCELLULAR LOCALISATION                                                           |
| CA4580 | 0.7 | 0.5 | 0.8 | IPF2233   | complemer unknown function                     |            | 2233 IPF2234    | No significant S.c. match                                                                                        |
| CA4581 | 1.1 | 1.1 | 1.0 | IPF2232   | complemer unknown function                     | orf19.6899 | 2232 IPF2233    | No significant S.c. match                                                                                        |
| CA4582 | 1.0 | 0.9 | 1.0 | MDM12     | 14224083..Involved in mitochondr               | orf19.6900 | 2231 IPF2232    | UNCLASSIFIED PROTEINS                                                                                            |
| CA4583 | 1.0 | 1.0 | 1.1 | IPF2229   | 14225693..unknown function                     | orf19.6901 | 2229 CaMDM12    | SUBCELLL molecular_function unknown                                                                              |
| CA4584 | 1.1 | 1.2 | 1.0 | IPF2228   | complemer similar to Saccharomy                | orf19.6902 | 2228 IPF2229    | UNCLASSI molecular_function unknown                                                                              |
| CA4585 | 0.8 | 0.8 | 0.9 | IPF2227   | complemer unknown function                     | orf19.6903 | 2227 IPF2228    | TRANSCR RNA binding,helicase activity                                                                            |
| CA4586 | 1.0 | 1.0 | 1.1 | GCN3      | 14230237.. Translation initiation fa           | orf19.6904 | 2224 IPF2227    | TRANSCR nucleotidyltransferase activity                                                                          |
| CA4587 | 1.0 | 0.9 | 1.0 | IPF2223   | complemer unknown function                     | orf19.6905 | 2223 CaGCN3     | PROTEIN 'translation regulator activity                                                                          |
| CA4588 | 1.0 | 1.1 | 1.0 | BEL1.EXO  | 14233745..protein of the 40S ribo              | orf19.6906 | 2221 IPF2223    | UNCLASSI molecular_function unknown                                                                              |
| CA4589 | 1.0 | 1.5 | 1.2 | BEL1.EXO  | 14234532..protein of the 40S ribosomal subur   |            | 2220 CaBEL1.ex  | ENERGY F molecular_function unknown                                                                              |
| CA4590 | 0.9 | 0.9 | 1.0 | IPF2218   | complemer unknown function                     | orf19.6907 | 2218 CaBEL1.ex  | ENERGY PROTEIN SYNTHESIS SUBCELLULAR LOCALISATION                                                                |
| CA4591 | 0.9 | 0.9 | 0.9 | IPF2216   | complemer putative poly(oligoglut              | orf19.6908 | 2216 IPF2218    | UNCLASSI molecular_function unknown                                                                              |
| CA4592 | 0.9 | 1.1 | 1.0 | IPF2215   | 14239185..unknown function                     | orf19.6909 | 2215 IPF2216    | Metabolism R ligase activity                                                                                     |
| CA4593 | 0.9 | 0.9 | 1.0 | IPF2214   | complemer unknown function                     | orf19.6910 | 2214 IPF2215    | TRANSCR transcription regulator activity                                                                         |

|        |     |     |     |          |                                              |             |       |          |                                                                                                                   |
|--------|-----|-----|-----|----------|----------------------------------------------|-------------|-------|----------|-------------------------------------------------------------------------------------------------------------------|
| CA4594 | 1.0 | 0.9 | 0.9 | IPF2212  | 14241952..unknown function                   | orf19.6912  | 2212  | IPF2214  | UNCLASSI DNA binding                                                                                              |
| CA4595 | 0.9 | 1.1 | 1.0 | GCN2     | complemer Ser/thr protein kinase (orf19.6913 |             | 2209  | IPF2212  | Lipid fatty-acid and isoprenoid metabolism ""SUBCELLULAR LOCALISATION                                             |
| CA4596 | 1.0 | 1.1 | 0.9 | MRE11    | 14249502..DNA repair and meiotic             | orf19.6915  | 2205  | CaGCN2   | PROTEIN ; protein kinase activity                                                                                 |
| CA4597 | 1.0 | 0.9 | 0.9 | ATP11    | complemer F1F0-ATPase comple                 | orf19.6916  | 2203  | CaMRE11  | CELL CYC protein binding                                                                                          |
| CA4598 | 1.0 | 0.9 | 0.9 | IPF20019 | complemer unknown function                   | orf19.6917  | 20019 | CaATP11  | PROTEIN I chaperone activity                                                                                      |
| CA4599 | 0.9 | 0.9 | 1.0 | IPF2200  | 14253886..Unknown function                   | orf19.6918  | 2200  | IPF20019 | UNCLASSImolecular_function unknown                                                                                |
| CA4600 | 1.0 | 1.0 | 1.1 | IPF2199  | 14257208..unknown function                   | orf19.6919  | 2199  | IPF2200  | No significant S.c. match                                                                                         |
| CA4601 | 1.0 | 1.0 | 1.0 | IPF2195  | 14261733..unknown function                   | orf19.6920  | 2195  | IPF2199  | No significant S.c. match                                                                                         |
| CA4602 | 1.1 | 1.1 | 1.0 | IPF6231  | 14266071..unknown function                   | orf19.1080; | 6231  | IPF2195  | No significant S.c. match                                                                                         |
| CA4603 | 1.0 | 1.1 | 1.1 | IPF6230  | complemer unknown function                   | orf19.1080; | 6230  | IPF6231  | TRANSCR oxidoreductase activity                                                                                   |
| CA4604 | 1.4 | 1.2 | 1.1 | MBF1     | 14267840..Multiprotein bridging fa           | orf19.3294  | 6228  | IPF6230  | Lipid fatty-oxidoreductase activity                                                                               |
| CA4605 | 1.0 | 1.0 | 1.0 | IPF6226  | complemer unknown function                   | orf19.3295  | 6226  | CaMBF1   | TRANSCR transcription regulator activity                                                                          |
| CA4606 | 0.9 | 0.9 | 0.9 | IPF6224  | 14270429..unknown function                   | orf19.3296  | 6224  | IPF6226  | UNCLASSIFIED PROTEINS                                                                                             |
| CA4607 | 0.9 | 1.0 | 1.0 | IPF6223  | complemer unknown function                   | orf19.3297  | 6223  | IPF6224  | No significant S.c. match                                                                                         |
| CA4608 | 1.0 | 1.0 | 1.0 | CCH1     | 14273192..Calcium channel prote              | orf19.3298  | 6222  | IPF6223  | UNCLASSIstructural molecule activity                                                                              |
| CA4609 | 1.0 | 0.9 | 1.0 | ZPR1     | complemer Zinc finger protein (by            | orf19.3300  | 6215  | CaCCH1   | REGULATItransporter activity                                                                                      |
| CA4610 | 0.9 | 0.9 | 0.9 | IPF19802 | 14284224..similar to Saccharomy              | orf19.3301  | 19802 | CaZPR1   | UNCLASSIprotein binding                                                                                           |
| CA4611 | 1.0 | 0.9 | 0.9 | IPF10727 | complemer unknown function                   | orf19.3302  | 10727 | IPF19802 | Amino acid protein binding                                                                                        |
| CA4612 | 1.1 | 0.9 | 1.1 | PPM2     | complemer carboxy methyl transfe             | orf19.3303  | 10724 | IPF10727 | C-compound and carbohydrate metabolism ENERGY SUBCELLULAR LOCALISATION                                            |
| CA4613 | 0.9 | 0.9 | 0.9 | IPF7950  | complemer similar to Saccharomy              | orf19.3304  | 7950  | CaPPM2   | PROTEIN Itransferase activity                                                                                     |
| CA4614 | 0.9 | 0.9 | 1.0 | IPF7952  | complemer unknown function                   | orf19.3305  | 7952  | IPF7950  | CELL CYC RNA binding                                                                                              |
| CA4615 | 1.0 | 1.0 | 0.9 | IPF7955  | complemer DNA binding protein (b             | orf19.3306  | 7955  | IPF7952  | Lipid fatty-acid and isoprenoid metabolism ""TRANSCRIPTION                                                        |
| CA4616 | 0.8 | 0.9 | 1.1 | IPF5761  | complemer flavin-containing mono             | orf19.3307  | 5761  | IPF7955  | CELL CYC DNA binding                                                                                              |
| CA4617 | 1.0 | 1.0 | 1.1 | STB5     | 14302298..SIN3 binding protein (t            | orf19.3308  | 5760  | IPF5761  | Nitrogen ar oxidoreductase activity                                                                               |
| CA4618 | 1.0 | 1.0 | 1.0 | IPF5757  | 14304763..unknown function                   | orf19.3309  | 5757  | CaSTB5   | TRANSCR DNA binding,transcription regulator activity                                                              |
| CA4619 | 1.0 | 1.0 | 0.9 | IPF5756  | complemer unknown function                   | orf19.3310  | 5756  | IPF5757  | No significant S.c. match                                                                                         |
| CA4620 | 1.0 | 1.0 | 1.0 | IFD3     | 14308373..OXIDOREDUCTASE (                   | orf19.3311  | 5754  | IPF5756  | No significant S.c. match                                                                                         |
| CA4621 | 1.0 | 1.1 | 1.0 | IPF5753  | 14309660..unknown function                   | orf19.3312  | 5753  | CaIFD3   | C-compound and carbohydrate metabolism ENERGY                                                                     |
| CA4622 | 1.0 | 1.1 | 1.0 | IPF5751  | complemer TRAPP subunit of 20                | orf19.3314  | 5751  | IPF5753  | UNCLASSImolecular_function unknown                                                                                |
| CA4623 | 0.9 | 0.9 | 1.0 | CTA9     | 14312715..Putative transcriptional           | orf19.3315  | 5750  | IPF5751  | CELLULAF molecular_function unknown                                                                               |
| CA4624 | 1.0 | 0.9 | 0.9 | IPF5747  | complemer unknown function                   | orf19.3318  | 5747  | CaCTA9   | No significant S.c. match                                                                                         |
| CA4625 | 1.1 | 1.2 | 1.0 | IPF5742  | 14317478..thioredoxin-like protein           | orf19.3319  | 5742  | IPF5747  | UNCLASSImolecular_function unknown                                                                                |
| CA4626 | 1.0 | 1.0 | 1.0 | MRS7     | 14319204..suppressor splicing de             | orf19.1083  | 5739  | IPF5742  | CELL CYCLE AND DNA PROCESSING ""PROTEIN FATE [folding modification destination] ""CELL RESCUE DEFENSE AND VIRULEN |
| CA4627 | 1.1 | 1.0 | 1.0 | DUT1     | complemer dUTP pyrophosphatas                | orf19.1083; | 5736  | CaMRS7   | UNCLASSImolecular_function unknown                                                                                |
| CA4628 | 1.2 | 1.2 | 1.2 | IPF13704 | 14324792..unknown function                   |             | 13704 | CaDUT1   | Nucleotide hydrolase activity                                                                                     |
| CA4629 | 1.0 | 1.0 | 1.0 | IPF13709 | 14329052..unknown function                   | orf19.335   | 13709 | IPF13704 | No significant S.c. match                                                                                         |
| CA4630 | 0.9 | 0.8 | 1.1 | IPF1537  | complemer putative adrenodoxin a             | orf19.336   | 1537  | IPF13709 | CELL CYCLE AND DNA PROCESSING ""PROTEIN FATE [folding modification destination] ""SUBCELLULAR LOCALISATION        |
| CA4631 | 1.0 | 1.1 | 0.9 | VTI1     | complemer v-SNARE involved in                | orf19.337   | 1535  | IPF1537  | CLASSIFICtransporter activity                                                                                     |
| CA4632 | 1.0 | 1.3 | 1.1 | IPF1531  | complemer unknown function                   | orf19.338   | 1531  | CaVTI1   | PROTEIN Itransporter activity                                                                                     |
| CA4633 | 1.1 | 1.3 | 0.9 | NDH1     | complemer Mitochondrial NADH di              | orf19.339   | 1529  | IPF1531  | UNCLASSImolecular_function unknown                                                                                |
| CA4634 | 1.0 | 1.0 | 1.0 | IPF1526  | complemer unknown function                   | orf19.340   | 1526  | CaNDH1   | ENERGY ;transporter activity                                                                                      |
| CA4635 | 1.0 | 0.9 | 1.0 | IPF1524  | complemer putative multidrug resis           | orf19.341   | 1524  | IPF1526  | TRANSCR molecular_function unknown                                                                                |
| CA4636 | 1.1 | 1.1 | 1.1 | IPF1520  | complemer unknown function                   | orf19.342   | 1520  | IPF1524  | CELL RESCUE DEFENSE AND VIRULENCE ""TRANSPORT FACILITATION                                                        |
| CA4637 | 1.0 | 1.1 | 1.1 | IPF1514  | complemer unknown function                   | orf19.344   | 1514  | IPF1520  | No significant S.c. match                                                                                         |
| CA4638 | 1.1 | 1.0 | 1.0 | UGA2     | 14352333..succinate-semialdehyc              | orf19.345   | 1510  | IPF1514  | No significant S.c. match                                                                                         |
| CA4639 | 1.0 | 0.9 | 0.9 | IPF1509  | complemer putative alanine transa            | orf19.346   | 1509  | CaUGA2   | Amino acid oxidoreductase activity                                                                                |
| CA4640 | 1.0 | 1.0 | 1.0 | IPF1506  | 14358098..unknown function                   | orf19.347   | 1506  | IPF1509  | Amino acid transferase activity                                                                                   |
| CA4641 | 0.9 | 0.9 | 1.0 | IPF1505  | 14360691..similar to saccharomy              | orf19.348   | 1505  | IPF1506  | No significant S.c. match                                                                                         |
| CA4642 | 1.0 | 1.0 | 1.0 | IPF1500  | complemer similar to Saccharomy              | orf19.349   | 1500  | IPF1505  | C-compound and carbohydrate metabolism CELL FATE CONTROL OF CELLULAR ORGANIZATION SUBCELLULAR LOCALISATION        |
| CA4643 | 1.0 | 1.0 | 1.0 | PRE9     | complemer 20S proteasome subur               | orf19.350   | 1499  | IPF1500  | CONTROL molecular_function unknown                                                                                |
| CA4644 | 1.1 | 1.0 | 1.0 | IPF1497  | 14366875..unknown function                   | orf19.351   | 1497  | CaPRE9   | PROTEIN Ipeptidase activity                                                                                       |
| CA4645 | 1.0 | 1.0 | 1.0 | IPF1496  | 14367588..unknown function                   | orf19.352   | 1496  | IPF1497  | UNCLASSImolecular_function unknown                                                                                |
| CA4646 | 1.1 | 1.1 | 1.0 | IPF1495  | complemer unknown function                   | orf19.353   | 1495  | IPF1496  | UNCLASSIFIED PROTEINS                                                                                             |
| CA4647 | 1.1 | 1.1 | 1.1 | IPF1493  | 14370664..similarity to E.coli X-Pr          | orf19.354   | 1493  | IPF1495  | PROTEIN FATE [folding modification destination]                                                                   |
| CA4648 | 1.0 | 1.0 | 0.9 | IPF9864  | complemer similar to Saccharomy              | orf19.1191; | 9864  | IPF1493  | PROTEIN Ipeptidase activity                                                                                       |
| CA4649 | 1.0 | 1.0 | 1.0 | GPX4     | 14386219..glutathione peroxidase             | orf19.4436  | 9860  | IPF9864  | SUBCELL structural molecule activity                                                                              |
| CA4650 | 1.0 | 1.0 | 1.0 | ISW1.3   | complemer ATPase component of                | orf19.1191  | 9859  | CaGPX4   | CELL RESCUE DEFENSE AND VIRULENCE                                                                                 |
| CA4651 | 1.0 | 1.0 | 1.0 | IPF3121  | complemer unknown function                   | orf19.1191; | 3121  | CaISW1.3 | TRANSCR hydrolase activity                                                                                        |
| CA4652 | 1.0 | 0.9 | 0.9 | IPF3105  | complemer Unknown function                   | orf19.4439  | 3105  | IPF3121  | CELL CYC transcription regulator activity                                                                         |
| CA4653 | 1.0 | 0.9 | 1.0 | IPF3102  | complemer similar to Saccharomy              | orf19.4440  | 3102  | IPF3105  | No significant S.c. match                                                                                         |
| CA4654 | 1.0 | 0.9 | 1.0 | IPF3101  | 14418332..unknown function                   | orf19.4441  | 3101  | IPF3102  | CELLULAF transporter activity                                                                                     |
| CA4655 | 0.9 | 0.9 | 1.0 | IPF3098  | 14420313..Putative mannosyltran:             | orf19.4442  | 3098  | IPF3101  | CELL CYC DNA binding                                                                                              |
| CA4656 | 1.0 | 0.9 | 1.0 | IPF3095  | complemer unknown function                   | orf19.4443  | 3095  | IPF3098  | C-compour transferase activity                                                                                    |
| CA4657 | 1.1 | 1.0 | 1.0 | IPF3094  | complemer 4-nitrophenyl phosphat             | orf19.4444  | 3094  | IPF3095  | REGULATItransferase activity                                                                                      |
| CA4658 | 1.0 | 1.0 | 0.9 | IPF3092  | complemer unknown function                   | orf19.4445  | 3092  | IPF3094  | Phosphate hydrolase activity                                                                                      |
| CA4659 | 0.9 | 1.0 | 1.0 | IPF17754 | 14428084..low affinity high capaci           | orf19.4446  | 17754 | IPF3092  | No significant S.c. match                                                                                         |
| CA4660 | 0.9 | 1.0 | 1.0 | YMC1     | complemer mitochondrial carrier p            | orf19.4447  | 6563  | IPF17754 | CELLULAR TRANSPORT AND TRANSPORT MECHANISMS SUBCELLULAR LOCALISATION TRANSPORT FACILITATION                       |
| CA4661 | 1.0 | 1.0 | 1.0 | IPF6561  | complemer unknown function                   | orf19.4448  | 6561  | CaYMC1   | CELLULAF transporter activity                                                                                     |
| CA4662 | 1.1 | 1.3 | 1.1 | LYS7     | complemer Copper chaperone for               | orf19.4449  | 6557  | IPF6561  | UNCLASSImolecular_function unknown                                                                                |
| CA4663 | 1.0 | 1.0 | 1.0 | IPF6554  | 14437834..unknown function                   | orf19.4450  | 6554  | CaLYS7   | PROTEIN I chaperone activity                                                                                      |
| CA4665 | 1.1 | 1.0 | 1.1 | IPF6548  | 14440757..translation elongation f           | orf19.4451  | 6548  | IPF6554  | TRANSCR molecular_function unknown                                                                                |
| CA4666 | 0.9 | 1.0 | 0.9 | IPF6542  | 14445472..unknown function                   | orf19.4455  | 6542  | IPF6548  | PROTEIN ;translation regulator activity                                                                           |

|        |     |     |     |          |                                                |       |           |                                                 |                                                                                   |
|--------|-----|-----|-----|----------|------------------------------------------------|-------|-----------|-------------------------------------------------|-----------------------------------------------------------------------------------|
| CA4667 | 1.2 | 1.6 | 1.5 | GAP5     | complemer General amino acid peorf19.4456      | 6541  | IPF6542   | UNCLASSI                                        | molecular_function unknown                                                        |
| CA4668 | 1.1 | 1.3 | 1.1 | ROM2     | complemer GDP/GTP exchange feorf19.906         | 4544  | CaGAP5    | Amino acid metabolism                           | CELLULAR TRANSPORT AND TRANSPORT MECHANISMS SUBCELLULAR LOCALISATION TRANSPORT FA |
| CA4669 | 1.0 | 1.0 | 1.0 | IPF4537  | 14458495..putative permease (by orf19.905      | 4537  | CaROM2    | C-compour signal transducer activity            |                                                                                   |
| CA4670 | 1.1 | 1.0 | 1.0 | IPF4536  | 14460038..unknown function orf19.904           | 4536  | IPF4537   | TRANSPO                                         | transporter activity                                                              |
| CA4671 | 7.3 | 4.8 | 3.1 | GPM1     | 14461584..phosphoglycerate mut:orf19.903       | 4535  | IPF4536   | Amino acid metabolism                           | SUBCELLULAR LOCALISATION                                                          |
| CA4672 | 1.4 | 2.3 | 1.1 | IPF3659  | 14462809..similar to Saccharomy:orf19.900      | 3659  | CaGPM1    | C-compour isomerase activity                    |                                                                                   |
| CA4673 | 1.1 | 1.1 | 1.1 | IPF3661  | 14465338..unknown function orf19.899           | 3661  | IPF3659   | TRANSCR                                         | structural molecule activity                                                      |
| CA4674 | 0.9 | 1.0 | 0.8 | HEM2     | 14466704..Porphobilinogen synth:orf19.898      | 3663  | IPF3661   | No significant S.c. match                       |                                                                                   |
| CA4675 | 0.7 | 0.6 | 0.8 | IPF3664  | complemer unknown function orf19.897           | 3664  | CaHEM2    | Metabolism                                      | lyase activity                                                                    |
| CA4676 | 1.0 | 1.0 | 1.0 | HK1      | 14469675..Histidine kinase orf19.896           | 3668  | IPF3664   | CLASSIFIC                                       | molecular_function unknown                                                        |
| CA4677 | 0.5 | 0.3 | 0.9 | HOG1     | complemer Ser/thr protein kinase corf19.895    | 3669  | CaHK1     | C-compound and carbohydrate metabolism          | CELLULAR COMMUNICATION/SIGNAL TRANSDUCTION MECHANISM ""CELL RESCUE DE             |
| CA4678 | 1.1 | 1.0 | 1.0 | IPF3670  | 14478750..unknown function orf19.894           | 3670  | CaHOG1    | C-compour protein kinase activity,              | signal transducer activity                                                        |
| CA4679 | 1.0 | 1.0 | 1.0 | IPF3674  | 14481512..unknown function orf19.893           | 3674  | IPF3670   | CELL                                            | CYC enzyme regulator activity                                                     |
| CA4680 | 1.1 | 1.2 | 1.1 | AMD1     | 14483896..AMP deaminase (by h:orf19.891        | 3677  | IPF3674   | No significant S.c. match                       |                                                                                   |
| CA4681 | 1.1 | 1.0 | 1.1 | IPF3679  | 14486567..similar to Saccharomy:orf19.889      | 3679  | CaAMD1    | Nucleotide hydrolase activity                   |                                                                                   |
| CA4682 | 1.2 | 1.4 | 1.1 | IPF3687  | 14488504..similar to Saccharomy:orf19.886      | 3687  | IPF3679   | TRANSCR                                         | transferase activity                                                              |
| CA4683 | 1.0 | 1.0 | 0.9 | HSP78.3F | complemer heat shock protein of corf19.884     | 9007  | IPF3687   | PROTEIN                                         | l protein binding                                                                 |
| CA4684 | 1.0 | 1.1 | 0.9 | HSP78.5F | complemer heat shock protein of corf19.882     | 9010  | CaHSP78.: | PROTEIN FATE [folding modification destination] | """"CELL RESCUE DEFENSE AND VIRULENCE ""SUBCELLULAR LOCALISATION                  |
| CA4685 | 1.0 | 1.1 | 1.1 | IPF9013  | complemer unknown function orf19.881           | 9013  | CaHSP78.: | PROTEIN FATE [folding modification destination] | """"CELL RESCUE DEFENSE AND VIRULENCE ""SUBCELLULAR LOCALISATION                  |
| CA4686 | 1.0 | 1.0 | 1.0 | IPF9015  | 14498374..unknown function orf19.880           | 9015  | IPF9013   | CELL                                            | FAT:molecular_function unknown                                                    |
| CA4687 | 0.9 | 1.0 | 1.0 | IPF9017  | complemer similar to Saccharomy:orf19.879      | 9017  | IPF9015   | UNCLASSI                                        | molecular_function unknown                                                        |
| CA4688 | 1.0 | 1.1 | 1.0 | NBN1     | 14503979..involved in chromatin r orf19.878    | 9018  | IPF9017   | CELLULAF                                        | protein binding                                                                   |
| CA4689 | 1.1 | 1.3 | 1.1 | IPF9020  | 14505254..unknown function orf19.8495          | 9020  | CaNBN1    | SUBCELLL                                        | enzyme regulator activity                                                         |
| CA4690 | 0.9 | 1.0 | 1.0 | IPF3959  | 14506309..unknown function orf19.8494          | 3959  | IPF9020   | No significant S.c. match                       |                                                                                   |
| CA4691 | 0.9 | 0.8 | 0.9 | IPF3958  | complemer unknown function orf19.874           | 3958  | IPF3959   | No significant S.c. match                       |                                                                                   |
| CA4692 | 1.1 | 1.1 | 1.1 | COX6.3   | complemer cytochrome-c oxidase subunit VI. :   | 3955  | IPF3958   | UNCLASSIFIED                                    | PROTEINS                                                                          |
| CA4693 | 1.1 | 1.0 | 1.0 | IPF3952  | complemer unknown function orf19.872           | 3952  | CaCOX6.3  | ENERGY                                          | oxidoreductase activity                                                           |
| CA4694 | 1.0 | 1.0 | 1.0 | IPF3950  | 14514082..unknown function orf19.8490          | 3950  | IPF3952   | No significant S.c. match                       |                                                                                   |
| CA4695 | 0.9 | 1.0 | 0.9 | IPF4229  | complemer unknown function orf19.6923          | 4229  | IPF3950   | CELL                                            | CYCLE AND DNA PROCESSING TRANSCRIPTION SUBCELLULAR LOCALISATION                   |
| CA4696 | 1.1 | 1.0 | 1.7 | HTA1     | complemer Histone H2A (by hom orf19.6924       | 4226  | IPF4229   | TRANSCR                                         | transcription regulator activity                                                  |
| CA4697 | 2.0 | 1.4 | 1.4 | HTB1     | 14527408..Histone H2B (by homo orf19.6925      | 4223  | CaHTA1    | TRANSCR                                         | DNA binding                                                                       |
| CA4698 | 1.0 | 1.0 | 0.9 | CDC25    | complemer cell division cycle proteorf19.6926  | 4222  | CaHTB1    | TRANSCR                                         | DNA binding                                                                       |
| CA4699 | 0.9 | 1.0 | 0.9 | IPF4220  | 14532785..similar to Saccharomy:orf19.6927     | 4220  | CaCDC25   | Nitrogen ar                                     | enzyme regulator activity                                                         |
| CA4700 | 1.1 | 1.2 | 1.0 | SAP9     | 14535383..aspartyl proteinase 9 (lorf19.6928   | 4215  | IPF4220   | PROTEIN                                         | l molecular_function unknown                                                      |
| CA4701 | 1.1 | 1.2 | 1.1 | IPF4214  | complemer unknown function orf19.6929          | 4214  | CaSAP9    | PROTEIN                                         | l peptidase activity                                                              |
| CA4702 | 1.1 | 0.8 | 1.2 | IPF4213  | 14538736..unknown function orf19.6930          | 4213  | IPF4214   | UNCLASSI                                        | molecular_function unknown                                                        |
| CA4703 | 1.2 | 1.1 | 1.2 | CLP1     | 14539673..probable cleavage/po orf19.6931      | 4212  | IPF4213   | No significant S.c. match                       |                                                                                   |
| CA4704 | 1.1 | 1.2 | 1.0 | RRD2     | complemer hosphotyrosyl phospho:orf19.6933     | 4207  | CaCLP1    | TRANSCR                                         | RNA binding                                                                       |
| CA4705 | 1.0 | 0.4 | 1.1 | IPF4206  | 14542348..unknown function orf19.6934          | 4206  | CaRRD2    | UNCLASSI                                        | protein phosphatase activity                                                      |
| CA4706 | 1.2 | 1.1 | 1.2 | RAD53    | complemer protein kinase orf19.6936            | 4205  | IPF4206   | CELL                                            | RESCUE DEFENSE AND VIRULENCE                                                      |
| CA4707 | 0.9 | 1.2 | 1.0 | PTR21    | complemer peptide transporter orf19.6937       | 4202  | CaRAD53   | CELL                                            | CYC protein kinase activity                                                       |
| CA4708 | 1.0 | 1.0 | 1.0 | MEU1     | complemer regulator of ADH2 exporf19.6938      | 5890  | CaPTR21   | CELLULAF                                        | transporter activity                                                              |
| CA4709 | 1.0 | 1.2 | 0.9 | IPF5895  | complemer unknown function orf19.6941          | 5895  | CaMEU1    | Nucleotide                                      | molecular_function unknown                                                        |
| CA4710 | 1.1 | 1.1 | 1.1 | ORC3     | 14556103..Origin recognition com orf19.6942    | 5897  | IPF5895   | UNCLASSI                                        | transferase activity                                                              |
| CA4711 | 1.2 | 1.4 | 1.2 | PHB1     | 14559208..Prohibitin, antiprolifera orf19.6944 | 5903  | CaORC3    | CELL                                            | CYC DNA binding                                                                   |
| CA4712 | 1.2 | 1.0 | 1.2 | GTT1.3   | complemer glutathione S-transfera orf19.6947   | 5904  | CaPHB1    | CELL                                            | CYC molecular_function unknown                                                    |
| CA4713 | 1.1 | 1.0 | 1.0 | CCC1     | complemer Transmembrane Ca2+ orf19.6948        | 5909  | CaGTT1.3  | CELL                                            | RES transferase activity                                                          |
| CA4714 | 0.9 | 0.9 | 1.0 | IPF5912  | complemer unknown function orf19.6950          | 5912  | CaCCC1    | REGULAT                                         | molecular_function unknown                                                        |
| CA4715 | 0.7 | 0.7 | 0.8 | DPL1     | complemer dihydrosphingosine ph orf19.6951     | 16613 | IPF5912   | UNCLASSI                                        | molecular_function unknown                                                        |
| CA4716 | 1.1 | 1.0 | 1.0 | IPF8666  | complemer unknown function orf19.6952          | 8666  | CaDPL1    | Lipid                                           | fatty-ylase activity                                                              |
| CA4717 | 1.0 | 0.8 | 0.9 | IPF8663  | complemer Unknown function orf19.6953          | 8663  | IPF8666   | UNCLASSI                                        | molecular_function unknown                                                        |
| CA4718 | 1.1 | 1.0 | 1.0 | IPF8661  | complemer unknown function orf19.6955          | 8661  | IPF8663   | UNCLASSI                                        | molecular_function unknown                                                        |
| CA4719 | 1.0 | 0.9 | 1.1 | DAL51    | complemer allantoin permease (t orf19.6956     | 8658  | IPF8661   | UNCLASSI                                        | chaperone activity                                                                |
| CA4720 | 1.0 | 1.0 | 1.0 | ECM18    | complemer Involved in cell wall bicorf19.6958  | 8656  | CaDAL51   | CELLULAF                                        | transporter activity                                                              |
| CA4721 | 1.0 | 1.1 | 1.0 | CPP1     | 14583857..probable protein-tyrosi orf19.1233i  | 15616 | CaECM18   | CONTROL                                         | molecular_function unknown                                                        |
| CA4722 | 0.9 | 1.0 | 1.0 | SAC1     | complemer integral membrane pro orf19.1232i    | 15617 | CaCPP1    | CELL                                            | CYC protein phosphatase activity                                                  |
| CA4723 | 1.1 | 1.1 | 1.0 | IPF18177 | 14589045..Unknown function orf19.1232i         | 18177 | CaSAC1    | CELLULAF                                        | hydrolase activity                                                                |
| CA4724 | 0.8 | 0.9 | 0.8 | PDC2     | 14590781..pyruvate decarboxylas orf19.1232     | 16151 | IPF18177  | UNCLASSI                                        | molecular_function unknown                                                        |
| CA4725 | 0.9 | 1.0 | 1.0 | PET100   | complemer cytochrome-c oxidase assembly p      | 16152 | CaPDC2    | C-compour                                       | transcription regulator activity                                                  |
| CA4726 | 1.0 | 1.0 | 1.0 | IPF12255 | 14594135..unknown function orf19.1232i         | 12255 | CaPET100  | ENERGY                                          | " chaperone activity                                                              |
| CA4727 | 1.1 | 0.9 | 1.0 | IPF12253 | complemer unknown function                     | 12253 | IPF12255  | CLASSIFIC                                       | molecular_function unknown                                                        |
| CA4728 | 1.0 | 1.0 | 1.0 | VPS41.3F | complemer required for the vacuol orf19.1232i  | 12250 | IPF12253  | No significant S.c. match                       |                                                                                   |
| CA4729 | 0.9 | 0.9 | 0.9 | VPS41.5F | complemer required for the vacuol orf19.1232   | 12249 | CaVPS41.: | PROTEIN                                         | l enzyme regulator activity                                                       |
| CA4730 | 1.1 | 1.0 | 1.0 | IPF7737  | 14600420..unknown function orf19.1232i         | 7737  | CaVPS41.: | PROTEIN FATE [folding modification destination] | ""SUBCELLULAR LOCALISATION                                                        |
| CA4731 | 0.9 | 0.9 | 1.0 | LIP3     | complemer Secretory lipase orf19.4856          | 7736  | IPF7737   | No significant S.c. match                       |                                                                                   |
| CA4732 | 0.9 | 1.0 | 1.0 | IPF7733  | 14604926..unknown function orf19.4855          | 7733  | CaLIP3    | Other                                           | virulence attributes                                                              |
| CA4733 | 1.0 | 0.9 | 1.0 | IPF7732  | complemer similar to Saccharomy:orf19.4853     | 7732  | IPF7733   | CLASSIFIC                                       | molecular_function unknown                                                        |
| CA4734 | 1.1 | 1.1 | 1.1 | TFA1     | 14608968..Large subunit of trans orf19.4851    | 7729  | IPF7732   | TRANSCR                                         | transcription regulator activity                                                  |
| CA4735 | 1.1 | 1.1 | 1.1 | IPF7726  | 14610999..unknown function orf19.4850          | 7726  | CaTFA1    | TRANSCR                                         | transcription regulator activity                                                  |
| CA4736 | 1.0 | 1.1 | 1.1 | IPF4503  | 14613866..unknown function orf19.4849          | 4503  | IPF7726   | UNCLASSI                                        | molecular_function unknown                                                        |
| CA4737 | 0.9 | 0.9 | 1.0 | SK13     | complemer antiviral protein orf19.4848         | 4502  | IPF4503   | TRANSCR                                         | molecular_function unknown                                                        |
| CA4738 | 0.8 | 0.8 | 0.9 | IPF4500  | complemer putative GTP-binding f orf19.4846    | 4500  | CaSK13    | CELL                                            | RES translation regulator activity                                                |



|        |     |     |     |           |                                          |            |       |           |                 |                                |                                                               |                          |            |            |                |      |          |             |      |      |           |
|--------|-----|-----|-----|-----------|------------------------------------------|------------|-------|-----------|-----------------|--------------------------------|---------------------------------------------------------------|--------------------------|------------|------------|----------------|------|----------|-------------|------|------|-----------|
| CA4739 | 1.0 | 1.0 | 1.2 | IPF4498   | 14621356..unknown function               | orf19.4845 | 4498  | IPF4500   | UNCLASSI        | molecular_function             | unknown                                                       |                          |            |            |                |      |          |             |      |      |           |
| CA4740 | 1.0 | 0.9 | 0.8 | IPF4497   | 14622263..unknown function               | orf19.4844 | 4497  | IPF4498   | UNCLASSI        | molecular_function             | unknown                                                       |                          |            |            |                |      |          |             |      |      |           |
| CA4741 | 0.9 | 1.0 | 0.9 | IPF4496   | 14623971..unknown function               | orf19.4843 | 4496  | IPF4497   | UNCLASSI        | molecular_function             | unknown                                                       |                          |            |            |                |      |          |             |      |      |           |
| CA4742 | 0.8 | 1.0 | 1.0 | SHY1      | 14627032..SURF homologue prot            | orf19.4841 | 4494  | IPF4496   | UNCLASSI        | oxidoreductase                 | activity                                                      |                          |            |            |                |      |          |             |      |      |           |
| CA4743 | 1.0 | 1.0 | 1.0 | IPF4491   | complemer unknown function               | orf19.4839 | 4491  | CaSHY1    | ENERGY          | ε                              | chaperone activity                                            |                          |            |            |                |      |          |             |      |      |           |
| CA4744 | 0.9 | 0.9 | 1.0 | IPF4489   | complemer unknown function               | orf19.4837 | 4489  | IPF4491   | UNCLASSI        | molecular_function             | unknown                                                       |                          |            |            |                |      |          |             |      |      |           |
| CA4745 | 1.0 | 0.9 | 1.0 | URA1      | complemer dihydroorotate dehydr          | orf19.4836 | 4487  | IPF4489   | CELL            | CYC                            | structural molecule activity                                  |                          |            |            |                |      |          |             |      |      |           |
| CA4746 | 0.9 | 1.0 | 0.9 | IPF4485   | 14632338..unknown function               | orf19.4835 | 4485  | CaURA1    | No significant  | S.c.                           | match                                                         |                          |            |            |                |      |          |             |      |      |           |
| CA4747 | 1.0 | 0.9 | 1.8 | IPF4484   | complemer unknown function               | orf19.4834 | 4484  | IPF4485   | UNCLASSI        | RNA                            | binding                                                       |                          |            |            |                |      |          |             |      |      |           |
| CA4748 | 0.2 | 0.2 | 0.2 | MLS1      | complemer malate synthase                | orf19.4833 | 4483  | IPF4484   | C-compound      | and                            | carbohydrate metabolism                                       |                          |            |            |                |      |          |             |      |      |           |
| CA4749 | 1.0 | 0.8 | 1.2 | IPF4481   | complemer unknown function               | orf19.4831 | 4481  | CaMLS1    | C-compour       | transferase                    | activity                                                      |                          |            |            |                |      |          |             |      |      |           |
| CA4750 | 1.0 | 1.0 | 0.9 | IPF4477   | complemer similar to Saccharomy          | orf19.4829 | 4477  | IPF4481   | No significant  | S.c.                           | match                                                         |                          |            |            |                |      |          |             |      |      |           |
| CA4751 | 0.9 | 1.0 | 1.0 | IPF11473  | complemer unknown function               | orf19.4828 | 11473 | IPF4477   | Lipid fatty-ε   | molecular_function             | unknown                                                       |                          |            |            |                |      |          |             |      |      |           |
| CA4752 | 0.8 | 0.8 | 0.8 | ADE12     | complemer adenylosuccinate syntl         | orf19.4827 | 11474 | IPF11473  | No significant  | S.c.                           | match                                                         |                          |            |            |                |      |          |             |      |      |           |
| CA4753 | 0.9 | 1.6 | 1.1 | IDH1.3    | complemer isocitrate dehydrogena         | orf19.4826 | 11475 | CaADE12   | Nucleotide      | ligase                         | activity                                                      |                          |            |            |                |      |          |             |      |      |           |
| CA4754 | 0.8 | 0.8 | 0.8 | IPF11479  | 14649594..unknown function               | orf19.4825 | 11479 | CaIDH1.3  | C-compour       | oxidoreductase                 | activity                                                      |                          |            |            |                |      |          |             |      |      |           |
| CA4755 | 0.9 | 1.0 | 1.1 | IPF11480  | complemer unknown function               | orf19.4824 | 11480 | IPF11479  | Metabolism      | molecular_function             | unknown                                                       |                          |            |            |                |      |          |             |      |      |           |
| CA4756 | 0.9 | 1.0 | 1.0 | LIP6      | 14653322..Secretory lipase               | orf19.4823 | 11788 | IPF11480  | No significant  | S.c.                           | match                                                         |                          |            |            |                |      |          |             |      |      |           |
| CA4757 | 1.0 | 0.9 | 1.0 | LIP10     | 14655761..Secretory lipase               | orf19.4822 | 11790 | CaLIP6    | Other virulence | attributes                     |                                                               |                          |            |            |                |      |          |             |      |      |           |
| CA4758 | 1.0 | 0.9 | 0.9 | PPR1      | complemer transcription factor reg       | orf19.3986 | 9661  | CaLIP10   | Other virulence | attributes                     |                                                               |                          |            |            |                |      |          |             |      |      |           |
| CA4759 | 1.0 | 1.0 | 1.0 | IPF9655   | 14694521..unknown function               | orf19.3988 | 9655  | CaPPR1    | Nucleotide      | DNA                            | binding,transcription regulator activity                      |                          |            |            |                |      |          |             |      |      |           |
| CA4760 | 1.0 | 0.9 | 0.9 | IPF9652   | 14696524..unknown function               | orf19.3990 | 9652  | IPF9655   | No significant  | S.c.                           | match                                                         |                          |            |            |                |      |          |             |      |      |           |
| CA4761 | 0.9 | 1.1 | 1.0 | IPF9650   | complemer lipase family protein cc       | orf19.3991 | 9651  | IPF9652   | UNCLASSI        | nucleotidyltransferase         | activity                                                      |                          |            |            |                |      |          |             |      |      |           |
| CA4762 | 1.1 | 1.0 | 1.0 | IPF9647   | complemer similar to Saccharomy          | orf19.3994 | 9647  | IPF9650   | Lipid fatty-ε   | hydrolase                      | activity                                                      |                          |            |            |                |      |          |             |      |      |           |
| CA4763 | 0.9 | 1.0 | 1.0 | IPF9645   | complemer similar to Saccharomy          | orf19.3995 | 9645  | IPF9647   | C-compour       | transferase                    | activity                                                      |                          |            |            |                |      |          |             |      |      |           |
| CA4764 | 1.0 | 0.9 | 0.9 | GP110     | 14703600..required for Glycosyl P        | orf19.3996 | 19803 | IPF9645   | PROTEIN         | I                              | peptidase activity                                            |                          |            |            |                |      |          |             |      |      |           |
| CA4765 | 2.0 | 0.8 | 2.6 | ADH1      | 14706501..alcohol dehydrogenase          | orf19.3997 | 17060 | CaGP110   | Lipid fatty-ε   | molecular_function             | unknown                                                       |                          |            |            |                |      |          |             |      |      |           |
| CA4766 | 1.1 | 1.1 | 1.0 | IPF13056  | complemer unknown function               | orf19.3998 | 13056 | CaADH1    | C-compound      | and                            | carbohydrate metabolism SUBCELLULAR LOCALISATION              |                          |            |            |                |      |          |             |      |      |           |
| CA4767 | 1.0 | 1.0 | 1.0 | IPF13054  | 14708705..unknown function               | orf19.3999 | 13054 | IPF13056  | No significant  | S.c.                           | match                                                         |                          |            |            |                |      |          |             |      |      |           |
| CA4768 | 1.0 | 1.1 | 1.0 | IPF9385   | 14717907..similar to Saccharomy          | orf19.4000 | 9385  | IPF13054  | UNCLASSIFIED    | PROTEINS                       |                                                               |                          |            |            |                |      |          |             |      |      |           |
| CA4769 | 1.0 | 1.0 | 0.9 | IPF9384   | 14720421..similar to Saccharomy          | orf19.4001 | 9384  | IPF9385   | Nucleotide      | DNA                            | binding,transcription regulator activity                      |                          |            |            |                |      |          |             |      |      |           |
| CA4770 | 1.0 | 1.0 | 1.0 | IPF9382.3 | complemer similar to Saccharomy          | orf19.4002 | 9382  | IPF9384   | ENERGY          |                                |                                                               |                          |            |            |                |      |          |             |      |      |           |
| CA4771 | 1.0 | 0.9 | 1.0 | IPF3336   | complemer unknown function               | orf19.4003 | 3336  | IPF9382.3 | CELL            | CYC                            | protein kinase activity                                       |                          |            |            |                |      |          |             |      |      |           |
| CA4772 | 0.7 | 0.6 | 0.9 | CCT3      | 14726652..Chaperonin (by homok           | orf19.4004 | 3339  | IPF3336   | CELLULAF        | molecular_function             | unknown                                                       |                          |            |            |                |      |          |             |      |      |           |
| CA4773 | 0.9 | 0.9 | 1.0 | IPF3340   | complemer unknown function               | orf19.4005 | 3340  | CaCCT3    | PROTEIN         | I                              | chaperone activity                                            |                          |            |            |                |      |          |             |      |      |           |
| CA4774 | 1.0 | 1.0 | 1.1 | IPF3341   | 14729142..Unknown function               | orf19.4006 | 3341  | IPF3340   | UNCLASSI        | transferase                    | activity                                                      |                          |            |            |                |      |          |             |      |      |           |
| CA4775 | 1.0 | 1.0 | 1.0 | IPF3342   | complemer Unknown function               | orf19.4007 | 3342  | IPF3341   | Metabolism      | oxidoreductase                 | activity                                                      |                          |            |            |                |      |          |             |      |      |           |
| CA4776 | 1.1 | 1.1 | 1.1 | CNB1      | complemer Protein phosphatase, (         | orf19.4009 | 3344  | IPF3342   | UNCLASSI        | molecular_function             | unknown                                                       |                          |            |            |                |      |          |             |      |      |           |
| CA4777 | 1.0 | 0.9 | 0.9 | PAN3      | 14732698..component of the Pab           | orf19.4010 | 3345  | CaCNB1    | TRANSCR         | protein phosphatase            | activity                                                      |                          |            |            |                |      |          |             |      |      |           |
| CA4778 | 1.1 | 1.1 | 1.0 | IFJ1      | 14736026..Unknown function               | orf19.4011 | 3348  | CaPAN3    | TRANSCR         | RNA                            | binding                                                       |                          |            |            |                |      |          |             |      |      |           |
| CA4779 | 1.0 | 1.0 | 1.1 | IPF3351   | 14738137..unknown function               | orf19.4012 | 3351  | CaIFJ1    | UNCLASSIFIED    | PROTEINS                       |                                                               |                          |            |            |                |      |          |             |      |      |           |
| CA4780 | 0.9 | 1.0 | 1.0 | IPF3352   | complemer unknown function               | orf19.4013 | 3352  | IPF3351   | UNCLASSI        | protein kinase activity,enzyme | regulator activity                                            |                          |            |            |                |      |          |             |      |      |           |
| CA4781 | 0.9 | 0.9 | 1.0 | IPF3355   | 14740761..similar to Saccharomy          | orf19.4014 | 3355  | IPF3352   | UNCLASSI        | molecular_function             | unknown                                                       |                          |            |            |                |      |          |             |      |      |           |
| CA4783 | 0.9 | 0.9 | 0.6 | IPF3358   | 14742404..ubiquinol-cytochrome- <i>c</i> | orf19.4016 | 3358  | IPF3355   | CELL            | CYCLE                          | AND                                                           | DNA                      | PROCESSING | REGULATION | OF/INTERACTION | WITH | CELLULAR | ENVIRONMENT | CELL | FATE | SUBCELLUL |
| CA4784 | 1.0 | 1.0 | 0.9 | IPF3359   | complemer Unknown function               | orf19.4017 | 3359  | IPF3358   | ENERGY          | ε                              | transporter activity,oxidoreductase                           | activity                 |            |            |                |      |          |             |      |      |           |
| CA4785 | 1.2 | 1.0 | 1.2 | IPF3361   | complemer putative mitochondrial         | orf19.4018 | 3361  | IPF3359   | No significant  | S.c.                           | match                                                         |                          |            |            |                |      |          |             |      |      |           |
| CA4786 | 0.9 | 0.8 | 1.0 | IPF3362   | 14747411..Unknown function               | orf19.4019 | 3362  | IPF3361   | PROTEIN         | I                              | structural molecule activity                                  |                          |            |            |                |      |          |             |      |      |           |
| CA4787 | 0.9 | 0.9 | 0.8 | IPF3364   | complemer Unknown function               | orf19.4021 | 3364  | IPF3362   | UNCLASSI        | molecular_function             | unknown                                                       |                          |            |            |                |      |          |             |      |      |           |
| CA4788 | 1.0 | 1.0 | 1.1 | SDH42     | complemer succinate dehydrogenε          | orf19.4022 | 3365  | IPF3364   | No significant  | S.c.                           | match                                                         |                          |            |            |                |      |          |             |      |      |           |
| CA4789 | 1.0 | 1.0 | 1.0 | IPF3366   | complemer Mitochondrial ribosomε         | orf19.4023 | 3366  | CaSDH42   | C-compound      | and                            | carbohydrate metabolism ENERGY                                | SUBCELLULAR LOCALISATION |            |            |                |      |          |             |      |      |           |
| CA4790 | 1.1 | 0.8 | 1.2 | IPF3367   | 14750556..Riboflavin synthase (b)        | orf19.4024 | 3367  | IPF3366   | PROTEIN         | I                              | structural molecule activity                                  |                          |            |            |                |      |          |             |      |      |           |
| CA4791 | 1.1 | 0.8 | 1.8 | IPF3370   | 14751414..similar to Saccharomy          | orf19.4025 | 3370  | IPF3367   | Metabolism      | transferase                    | activity                                                      |                          |            |            |                |      |          |             |      |      |           |
| CA4792 | 0.9 | 1.0 | 1.1 | HIS1      | complemer ATP phosphoribosyltra          | orf19.4026 | 3372  | IPF3370   | PROTEIN         | I                              | peptidase activity                                            |                          |            |            |                |      |          |             |      |      |           |
| CA4793 | 0.9 | 0.8 | 1.0 | IPF3375   | complemer similar to Saccharomy          | orf19.4028 | 3375  | CaHIS1    | Amino acid      | transferase                    | activity                                                      |                          |            |            |                |      |          |             |      |      |           |
| CA4794 | 0.6 | 0.5 | 0.8 | SQT1      | 14754614..suppresses dominant- <i>r</i>  | orf19.4029 | 3377  | IPF3375   | PROTEIN         | I                              | transferase activity                                          |                          |            |            |                |      |          |             |      |      |           |
| CA4795 | 1.1 | 1.0 | 1.0 | IPF3378   | 14756058..similar to Saccharomy          | orf19.4030 | 3378  | CaSQT1    | PROTEIN         | I                              | molecular_function                                            | unknown                  |            |            |                |      |          |             |      |      |           |
| CA4796 | 0.9 | 0.9 | 1.0 | IPF3380   | complemer unknown function               | orf19.4031 | 3380  | IPF3378   | CELL            | CYC                            | nucleotidyltransferase                                        | activity                 |            |            |                |      |          |             |      |      |           |
| CA4797 | 1.0 | 0.9 | 1.0 | PRP22     | complemer RNA-dependent ATPα             | orf19.4033 | 8801  | IPF3380   | UNCLASSI        | molecular_function             | unknown                                                       |                          |            |            |                |      |          |             |      |      |           |
| CA4798 | 1.1 | 1.1 | 0.9 | RPN5.3F   | 14763195..subunit of the regulator       | orf19.4032 | 8798  | CaPRP22   | TRANSCR         | RNA                            | binding,helicase                                              | activity                 |            |            |                |      |          |             |      |      |           |
| CA4799 | 1.0 | 1.0 | 1.0 | RPN5.5F   | 14763967..subunit of the regulator       | orf19.4034 | 8797  | CaRPN5.3I | PROTEIN         | I                              | peptidase activity                                            |                          |            |            |                |      |          |             |      |      |           |
| CA4800 | 1.6 | 2.2 | 1.4 | IPF8796   | complemer putative GPI-anchore           | orf19.4035 | 8796  | CaRPN5.5I | PROTEIN         | FATE                           | [folding modification destination] ""SUBCELLULAR LOCALISATION |                          |            |            |                |      |          |             |      |      |           |
| CA4801 | 1.0 | 1.0 | 1.0 | APM1      | 14766973..AP-1 complex subunit,          | orf19.4036 | 8795  | IPF8796   | SUBCELLI        | molecular_function             | unknown                                                       |                          |            |            |                |      |          |             |      |      |           |
| CA4802 | 0.9 | 1.0 | 0.9 | ILV3      | complemer dihydroxyacid dehydra          | orf19.4040 | 8790  | CaAPM1    | PROTEIN         | I                              | protein binding                                               |                          |            |            |                |      |          |             |      |      |           |
| CA4803 | 0.9 | 1.0 | 0.9 | PEX4      | 14770965..E2 ubiquitin-conjugat          | orf19.4041 | 7214  | CaILV3    | Amino acid      | lyase                          | activity                                                      |                          |            |            |                |      |          |             |      |      |           |
| CA4804 | 0.9 | 0.9 | 1.1 | ARO8      | complemer aromatic amino acid ar         | orf19.2098 | 1147  | CaPEX4    | PROTEIN         | FATE                           | [folding modification destination] ""SUBCELLULAR LOCALISATION |                          |            |            |                |      |          |             |      |      |           |
| CA4805 | 1.0 | 0.9 | 1.0 | RAD5      | 14775461..DNA helicase (by hom           | orf19.2097 | 1153  | CaARO8    | Amino acid      | transferase                    | activity                                                      |                          |            |            |                |      |          |             |      |      |           |
| CA4806 | 0.8 | 0.9 | 0.8 | IPF1155   | complemer Putative dipeptidase (t        | orf19.2095 | 1155  | CaRAD5    | CELL            | CYC                            | hydrolase activity                                            |                          |            |            |                |      |          |             |      |      |           |
| CA4807 | 1.0 | 1.1 | 0.9 | PDR6      | 14781435..Pleiotropic drug resista       | orf19.2094 | 1158  | IPF1155   | UNCLASSI        | molecular_function             | unknown                                                       |                          |            |            |                |      |          |             |      |      |           |
| CA4808 | 1.6 | 1.0 | 1.4 | RFA1      | complemer DNA replication factor         | orf19.2093 | 1160  | CAPDR6    | PROTEIN         | I                              | protein binding                                               |                          |            |            |                |      |          |             |      |      |           |
| CA4809 | 1.0 | 1.0 | 1.0 | IPF1162   | complemer Cystathionine beta-lyα         | orf19.2092 | 1162  | CaRFA1    | CELL            | CYC                            | DNA                                                           | binding                  |            |            |                |      |          |             |      |      |           |
| CA4810 | 0.9 | 0.9 | 0.8 | IPF1164   | complemer Subunit NUHM of NAD            | orf19.2091 | 1164  | IPF1162   | Amino acid      | lyase                          | activity                                                      |                          |            |            |                |      |          |             |      |      |           |
| CA4811 | 1.1 | 1.0 | 1.0 | ECM16     | complemer RNA helicase (by hom           | orf19.2090 | 1169  | IPF1164   | No significant  | S.c.                           | match                                                         |                          |            |            |                |      |          |             |      |      |           |

|        |     |     |     |            |                                                  |                  |                                                                                                        |
|--------|-----|-----|-----|------------|--------------------------------------------------|------------------|--------------------------------------------------------------------------------------------------------|
| CA4812 | 1.0 | 1.0 | 1.0 | IPF1171    | 14794532..Putative synaptobrevin orf19.2089      | 1171 CaECM16     | CONTROL RNA binding,helicase activity                                                                  |
| CA4813 | 1.0 | 0.9 | 1.0 | DPB4       | complemer DNA-directed DNA pol orf19.2088        | 1174 IPF1171     | PROTEIN I transporter activity                                                                         |
| CA4814 | 0.7 | 0.3 | 0.9 | SAS2       | 14796407..Zinc finger protein invo orf19.2087    | 1176 CaDPB4      | TRANSCR nucleotidyltransferase activity                                                                |
| CA4815 | 1.0 | 0.9 | 0.9 | CDH1       | complemer Substrate-specific activ orf19.2084    | 20022 CaSAS2     | CELL CYC transferase activity                                                                          |
| CA4816 | 1.0 | 0.9 | 1.0 | IPF1183    | 14800278..putative aspartyl protease orf19.2082  | 1183 CaCDH1      | CELL CYC enzyme regulator activity                                                                     |
| CA4817 | 1.0 | 1.0 | 1.1 | POM152     | 14801845..Nuclear pore membrar orf19.2081        | 1191 IPF1183     | PROTEIN FATE [folding modification destination]                                                        |
| CA4818 | 1.0 | 1.2 | 1.0 | IPF1193    | complemer unknown function orf19.2079            | 1193 CaPOM152    | CELLULAF structural molecule activity                                                                  |
| CA4819 | 0.9 | 0.9 | 1.0 | IPF1194    | 14806771..Similar to clathrin coat orf19.2078    | 1194 IPF1193     | Metabolismr molecular_function unknown                                                                 |
| CA4820 | 1.0 | 1.0 | 1.0 | IPF1196    | 14809301..unknown function Hyprorf19.2077        | 1196 IPF1194     | CELLULAF protein binding                                                                               |
| CA4821 | 1.1 | 0.9 | 0.9 | IPF1197    | 14812123..unknown function orf19.2076            | 1197 IPF1196     | Amino acid metabolism Nitrogen and sulphur metabolism TRANSCRIPTION SUBCELLULAR LOCALISATION           |
| CA4822 | 1.0 | 1.0 | 1.1 | DFG5       | 14814010..Required for filamentous orf19.2075    | 1199 IPF1197     | UNCLASSI molecular_function unknown                                                                    |
| CA4823 | 1.0 | 0.9 | 1.0 | ERC3       | 14815987..ethionine resistance pr orf19.2073     | 1203 CaDFG5      | CELL FATI molecular_function unknown                                                                   |
| CA4824 | 0.9 | 1.0 | 0.9 | HNM2       | 14819106..Choline permease (by orf19.2072        | 1204 CaERC3      | UNCLASSI molecular_function unknown                                                                    |
| CA4825 | 1.0 | 1.0 | 1.1 | IPF1205    | 14821039..unknown function orf19.2071            | 1205 CaHNM2      | CELLULAF transporter activity                                                                          |
| CA4826 | 0.8 | 0.9 | 0.9 | IPF1206    | 14822042..unknown function orf19.2070            | 1206 IPF1205     | No significant S.c. match                                                                              |
| CA4827 | 1.1 | 0.9 | 1.0 | SMF2       | complemer Manganese transport orf19.2069         | 1207 IPF1206     | UNCLASSI molecular_function unknown                                                                    |
| CA4828 | 1.1 | 0.9 | 0.9 | IPF1209    | 14826300..unknown function orf19.2068            | 1209 CaSMF2      | REGULATI transporter activity                                                                          |
| CA4829 | 1.1 | 1.1 | 1.0 | IPF1210    | complemer similar to Saccharomy orf19.2067       | 1210 IPF1209     | UNCLASSIFIED PROTEINS                                                                                  |
| CA4830 | 1.0 | 1.1 | 1.0 | ATP8.EXO   | complemer F1F0-ATPase complex, Atp8 subu         | 1211 IPF1210     | Nitrogen ar molecular_function unknown                                                                 |
| CA4831 | 0.8 | 0.9 | 0.9 | IPF1212    | complemer unknown function orf19.2066            | 1212 CaATP8.ex   | ENERGY I transporter activity                                                                          |
| CA4832 | 0.9 | 0.8 | 0.9 | DAL2       | complemer Allantoinase orf19.2065                | 1213 IPF1212     | UNCLASSI transferase activity                                                                          |
| CA4833 | 1.1 | 1.1 | 1.0 | IPF1216    | 14832576..unknown function orf19.2064            | 1216 CaDAL2      | Nitrogen ar hydrolase activity                                                                         |
| CA4834 | 1.1 | 1.0 | 1.0 | IPF1217    | 14836185..unknown function orf19.2063            | 1217 IPF1216     | CELL FATE UNCLASSIFIED PROTEINS                                                                        |
| CA4835 | 0.9 | 0.9 | 1.1 | IPF1218    | complemer Similar to superoxide c orf19.2062     | 1218 IPF1217     | CELL FATE UNCLASSIFIED PROTEINS                                                                        |
| CA4836 | 0.1 | 0.0 | 0.3 | IPF1222    | complemer Similar to superoxide c orf19.2060     | 1222 IPF1218     | CELL RESCUE DEFENSE AND VIRULENCE ""SUBCELLULAR LOCALISATION                                           |
| CA4837 | 0.9 | 1.0 | 1.0 | IPF1228    | 14846438..unknown function orf19.2059            | 1228 IPF1222     | CELL RESCUE DEFENSE AND VIRULENCE ""SUBCELLULAR LOCALISATION                                           |
| CA4838 | 1.0 | 1.1 | 1.0 | YTA12      | 14848221..Protease of the SEC1E orf19.2057       | 1231 IPF1228     | No significant S.c. match                                                                              |
| CA4839 | 0.9 | 0.9 | 0.9 | NPL6       | 14850998..Nuclear protein localiz:orf19.2055     | 1234 CaYTA12     | ENERGY I peptidase activity                                                                            |
| CA4840 | 0.9 | 1.0 | 1.0 | IPF1235    | complemer unknown function orf19.2054            | 1235 CaNPL6      | PROTEIN I molecular_function unknown                                                                   |
| CA4841 | 1.0 | 1.2 | 1.0 | IPF10355   | complemer unknown function orf19.3809            | 10355 IPF1235    | PROTEIN FATE [folding modification destination] ""SUBCELLULAR LOCALISATION                             |
| CA4842 | 1.0 | 1.1 | 1.0 | MTD1       | complemer methylenetetrahydrofo orf19.3810       | 6938 IPF10355    | Amino acid transcription regulator activity                                                            |
| CA4843 | 1.1 | 1.0 | 1.0 | GYP1       | complemer GTPase activating prot orf19.3811      | 6940 CaMTD1      | Nucleotide oxidoreductase activity                                                                     |
| CA4844 | 0.8 | 0.9 | 0.8 | PDR13      | complemer Drug resistance orf19.3812             | 6943 CaGYP1      | CELLULAF enzyme regulator activity                                                                     |
| CA4845 | 0.8 | 0.8 | 0.9 | IPF6945.5f | 14865030..unknown function, 5-pr orf19.3813      | 6945 CaPDR13     | CELL RES chaperone activity                                                                            |
| CA4846 | 1.0 | 1.0 | 0.9 | IPF6945.3f | 14865835..unknown function, 3-pr orf19.3814      | 6946 IPF6945.5f  | No significant S.c. match                                                                              |
| CA4847 | 1.0 | 1.0 | 1.1 | IPF6951    | 14867398..similar to Saccharomy orf19.3815       | 6951 IPF6945.3f  | No significant S.c. match                                                                              |
| CA4848 | 0.9 | 0.8 | 0.9 | RTS2       | complemer Unknown function orf19.3817            | 6953 IPF6951     | PROTEIN I peptidase activity                                                                           |
| CA4849 | 1.0 | 0.9 | 1.0 | IPF6954    | 14871578..unknown function orf19.3818            | 6954 CaRTS2      | CELL CYC molecular_function unknown                                                                    |
| CA4850 | 1.0 | 1.0 | 1.0 | CIRT2      | 14873961..Transposase orf19.3820                 | 3257 IPF6954     | No significant S.c. match                                                                              |
| CA4851 | 1.0 | 1.0 | 0.9 | IPF5818    | 14881168..unknown function orf19.3821            | 5818 CaCirt2     | CLASSIFICATION NOT YET CLEAR-CUT                                                                       |
| CA4852 | 1.5 | 1.3 | 1.2 | SCS7       | complemer Required for hydroxyla orf19.3822      | 5819 IPF5818     | No significant S.c. match                                                                              |
| CA4853 | 1.0 | 0.8 | 1.0 | IPF5823    | complemer similar to Saccharomy orf19.3823       | 5823 CaSCS7      | Lipid fatty-ε oxidoreductase activity                                                                  |
| CA4854 | 1.2 | 1.2 | 1.2 | RCE1       | complemer CAAAX PRENYL PROT orf19.3825           | 5825 IPF5823     | CELL CYC protein binding                                                                               |
| CA4855 | 1.0 | 0.9 | 1.0 | IPF5830    | 14894227..unknown function orf19.3826            | 5830 CaRCE1      | PROTEIN I peptidase activity                                                                           |
| CA4856 | 1.0 | 1.0 | 1.0 | IPF15950   | 14896097..unknown function orf19.3827            | 15950 IPF5830    | UNCLASSIFIED PROTEINS                                                                                  |
| CA4857 | 1.4 | 1.1 | 1.1 | PHR1       | 14899415..GPI-anchored pH resp orf19.3829        | 15932 IPF15950   | UNCLASSI molecular_function unknown                                                                    |
| CA4858 | 0.9 | 1.1 | 1.0 | IPF15927.3 | complemer similar to Saccharomy orf19.3831       | 15929 CaPHR1     | Lipid fatty-acid and isoprenoid metabolism ""CONTROL OF CELLULAR ORGANIZATION SUBCELLULAR LOCALISATION |
| CA4859 | 1.0 | 1.1 | 1.1 | IPF15927.5 | complemer similar to Saccharomy orf19.3833       | 15927 IPF15927.3 | UNCLASSI RNA binding                                                                                   |
| CA4860 | 1.0 | 0.9 | 0.9 | IPF19804   | complemer unknown Function orf19.3835            | 19804 IPF15927.5 | TRANSCR transcription regulator activity                                                               |
| CA4861 | 1.0 | 0.9 | 1.0 | IPF4094    | 14906755..unknown function orf19.3836            | 4094 IPF19804    | TRANSCRIPTION SUBCELLULAR LOCALISATION                                                                 |
| CA4862 | 1.2 | 2.1 | 1.2 | EFB1       | 14908222..translation elongation f orf19.3838    | 4091 IPF4094     | UNCLASSI molecular_function unknown                                                                    |
| CA4863 | 1.0 | 1.0 | 1.0 | IPF4089    | complemer secretory aspartyl prot orf19.3839     | 4089 CaEFB1      | PROTEIN I :translation regulator activity                                                              |
| CA4864 | 1.0 | 0.9 | 1.0 | IPF4087    | 14912663..similar to Saccharomy orf19.3840       | 4087 IPF4089     | PROTEIN FATE [folding modification destination] ""SUBCELLULAR LOCALISATION                             |
| CA4865 | 1.0 | 0.9 | 1.0 | IPF4085    | 14917806..similar to Saccharomy orf19.3841       | 4085 IPF4087     | TRANSCR protein kinase activity                                                                        |
| CA4866 | 0.9 | 1.0 | 0.9 | IPF4083    | complemer similar to Saccharomy orf19.3843       | 4083 IPF4085     | PROTEIN I protein kinase activity                                                                      |
| CA4867 | 1.1 | 1.0 | 1.1 | IPF4080    | complemer similar to Saccharomy orf19.3844       | 4080 IPF4083     | PROTEIN I transporter activity                                                                         |
| CA4868 | 0.9 | 1.5 | 1.0 | IPF4078    | complemer Unknown Function orf19.3845            | 4078 IPF4080     | PROTEIN I :structural molecule activity                                                                |
| CA4869 | 1.1 | 1.0 | 1.0 | LYS4       | 14925418..homoaconitate hydrate orf19.3846       | 4077 IPF4078     | No significant S.c. match                                                                              |
| CA4870 | 0.9 | 1.1 | 1.0 | IPF19568   | 14935736..unknown function orf19.6556            | 19568 CaLYS4     | Amino acid lyase activity                                                                              |
| CA4871 | 1.0 | 0.9 | 0.9 | IPF1680    | complemer probable amidase orf19.6557            | 1680 IPF19568    | No significant S.c. match                                                                              |
| CA4872 | 1.0 | 1.0 | 1.0 | SEC231     | 14941589..Component of COPII c orf19.6558        | 1677 IPF1680     | Nitrogen ar hydrolase activity                                                                         |
| CA4873 | 1.1 | 1.0 | 1.0 | IPF1674.3  | complemer putative transcription initiation fact | 1675 CaSEC231    | CELLULAR TRANSPORT AND TRANSPORT MECHANISMS SUBCELLULAR LOCALISATION                                   |
| CA4874 | 1.1 | 1.1 | 0.9 | IPF1674    | complemer putative transcription ir orf19.6559   | 1674 IPF1674.3   | No significant S.c. match                                                                              |
| CA4875 | 1.3 | 2.0 | 1.1 | LAT1       | complemer Dihydroliipoamide S-ac orf19.6561      | 1673 IPF1674     | UNCLASSI molecular_function unknown                                                                    |
| CA4876 | 1.0 | 0.9 | 1.0 | RNH35      | complemer RNase H (by homology) orf19.6562       | 1669 CaLAT1      | C-coumpur transferase activity                                                                         |
| CA4877 | 1.0 | 1.0 | 1.1 | IPF1667    | 14950419..unknown function orf19.6563            | 1667 CaRNH35     | Nucleotide RNA binding                                                                                 |
| CA4878 | 1.0 | 0.9 | 1.0 | OXA1       | complemer Cytochrome oxidase b orf19.6565        | 1663 IPF1667     | UNCLASSI molecular_function unknown                                                                    |
| CA4879 | 1.0 | 0.9 | 1.0 | IPF1660    | 14954636..unknown function orf19.6566            | 1660 CaOXA1      | ENERGY I transporter activity                                                                          |
| CA4880 | 1.0 | 0.9 | 1.0 | RHC18      | complemer Recombination repair f orf19.6568      | 1656 IPF1660     | UNCLASSIFIED PROTEINS                                                                                  |
| CA4881 | 1.0 | 1.0 | 1.0 | IPF1652    | 14960328..putative purine nucleos orf19.6569     | 1652 CaRHC18     | CELL CYC molecular_function unknown                                                                    |
| CA4882 | 0.9 | 0.9 | 1.0 | IPF1651    | 14962314..purine nucleoside perm orf19.6570      | 1651 IPF1652     | No significant S.c. match                                                                              |
| CA4883 | 1.6 | 1.7 | 1.2 | IPF1649    | complemer similar to Saccharomy orf19.6573       | 1649 IPF1651     | No significant S.c. match                                                                              |

|        |     |     |     |           |                                                |       |           |                                                                                                                     |
|--------|-----|-----|-----|-----------|------------------------------------------------|-------|-----------|---------------------------------------------------------------------------------------------------------------------|
| CA4884 | 1.0 | 0.9 | 1.0 | ALK6      | complemer n-alkane inducible cytc orf19.6574   | 1640  | IPF1649   | CELL CYC signal transducer activity                                                                                 |
| CA4885 | 1.1 | 1.1 | 1.1 | IPF1636   | complemer similar to Saccharomy orf19.6577     | 1636  | CaALK6    | CELL RESCUE DEFENSE AND VIRULENCE ""CELL FATE CONTROL OF CELLULAR ORGANIZATION                                      |
| CA4886 | 1.0 | 1.0 | 0.9 | IPF1634   | complemer unknown function orf19.6578          | 1634  | IPF1636   | CELL RES transporter activity                                                                                       |
| CA4887 | 1.0 | 1.0 | 1.1 | IPF1632   | complemer unknown function orf19.6579          | 1632  | IPF1634   | Phosphate metabolism CELLULAR TRANSPORT AND TRANSPORT MECHANISMS REGULATION OF/INTERACTION WITH CELLULAF            |
| CA4888 | 1.0 | 1.0 | 1.0 | IPF1631   | complemer unknown function orf19.6580          | 1631  | IPF1632   | No significant S.c. match                                                                                           |
| CA4889 | 0.9 | 0.9 | 0.9 | IPF1629   | complemer unknown function orf19.6581          | 1629  | IPF1631   | No significant S.c. match                                                                                           |
| CA4890 | 1.1 | 0.9 | 1.1 | PRE10     | 14990263..20S proteasome subur orf19.6582      | 1628  | IPF1629   | UNCLASSI molecular_function unknown                                                                                 |
| CA4891 | 0.9 | 0.9 | 1.0 | IPF1627   | 14991363..unknown function orf19.6583          | 1627  | CaPRE10   | PROTEIN I peptidase activity                                                                                        |
| CA4892 | 1.2 | 1.0 | 1.0 | PRT1      | 14994841..Translation initiation fa orf19.6584 | 1623  | IPF1627   | CELLULAR TRANSPORT AND TRANSPORT MECHANISMS SUBCELLULAR LOCALISATION                                                |
| CA4893 | 1.0 | 0.9 | 0.9 | IPF1621   | complemer unknown function orf19.6585          | 1621  | CaPRT1    | CELL CYC translation regulator activity                                                                             |
| CA4894 | 0.9 | 0.9 | 0.8 | IPF1617   | 15003438..unknown function orf19.6586          | 1617  | IPF1621   | UNCLASSI molecular_function unknown                                                                                 |
| CA4895 | 1.0 | 0.9 | 1.0 | IPF18161  | complemer unknown function orf19.6587          | 18161 | IPF1617   | No significant S.c. match                                                                                           |
| CA4896 | 0.9 | 0.9 | 1.0 | IPF18160  | 15009072..unknown function orf19.6588          | 18160 | IPF18161  | UNCLASSI molecular_function unknown                                                                                 |
| CA4897 | 1.3 | 1.5 | 2.0 | TUB2.3    | 15014118..Beta-tubulin, 3-prime e orf19.6034   | 1463  | IPF18160  | PROTEIN I molecular_function unknown                                                                                |
| CA4898 | 0.7 | 0.8 | 0.6 | IPF1461   | complemer putative NADH dehydr orf19.6035      | 1461  | CaTUB2.3  | CELL CYC structural molecule activity                                                                               |
| CA4899 | 0.9 | 0.9 | 1.0 | IPF1460   | complemer unknown function orf19.6036          | 1460  | IPF1461   | No significant S.c. match                                                                                           |
| CA4900 | 1.0 | 1.1 | 1.0 | IPF2      | complemer unknown function orf19.6037          | 1459  | IPF1460   | TRANSCR enzyme regulator activity                                                                                   |
| CA4901 | 1.0 | 0.9 | 0.9 | IPF1457   | 15023409..putative transcription a orf19.6038  | 1457  | CaIFP2    | No significant S.c. match                                                                                           |
| CA4902 | 1.0 | 1.1 | 1.0 | SED5      | 15025486..Syntaxin (by homology orf19.6039     | 1455  | IPF1457   | Nitrogen and sulphur metabolism TRANSCRIPTION SUBCELLULAR LOCALISATION                                              |
| CA4903 | 0.8 | 0.7 | 0.7 | SNF7      | 15027036..Class E Vps protein (b orf19.6040    | 1454  | CaSED5    | CELLULAF transporter activity                                                                                       |
| CA4904 | 1.1 | 1.0 | 1.0 | RPO41     | 15028260..Mitochondrial DNA-dir orf19.6041     | 1453  | CaSNF7    | C-compour molecular_function unknown                                                                                |
| CA4905 | 1.0 | 0.8 | 0.9 | DLD1      | complemer D-lactate ferricytochr orf19.6043    | 1451  | CaRPO41   | CELL CYC nucleotidyltransferase activity                                                                            |
| CA4906 | 0.9 | 1.1 | 1.0 | MOB2      | complemer Required for maintenai orf19.6044    | 1449  | CaDLD1    | C-compound and carbohydrate metabolism ENERGY SUBCELLULAR LOCALISATION                                              |
| CA4907 | 0.9 | 0.9 | 1.0 | PSD1      | complemer Phosphatidylserine der orf19.6045    | 1448  | CaMOB2    | No signific structural molecule activity                                                                            |
| CA4908 | 1.1 | 1.0 | 0.9 | IPF1445   | complemer similar to Saccharomy orf19.6046     | 1445  | CaPSD1    | Lipid fatty-ε lyase activity                                                                                        |
| CA4909 | 1.0 | 1.0 | 1.0 | TUF1      | complemer Translation elongation orf19.6047    | 1439  | IPF1445   | CELL CYC protein binding                                                                                            |
| CA4910 | 0.9 | 1.0 | 1.0 | IPF1437   | complemer unknown function orf19.6048          | 1437  | CaTUF1    | PROTEIN † translation regulator activity                                                                            |
| CA4911 | 1.0 | 0.9 | 1.0 | IPF1435   | 15045593..unknown function orf19.6049          | 1435  | IPF1437   | C-compound and carbohydrate metabolism ""PROTEIN FATE [folding modification destination] ""SUBCELLULAR LOCALISATION |
| CA4912 | 0.9 | 1.0 | 0.9 | CNS1      | complemer Cyclophilin Seven Sup orf19.6052     | 1432  | IPF1435   | CELL CYC enzyme regulator activity                                                                                  |
| CA4913 | 1.0 | 1.0 | 1.0 | CIS2      | complemer Gamma-glutamyltrans orf19.6053       | 1431  | CaCNS1    | UNCLASSI chaperone activity                                                                                         |
| CA4914 | 1.1 | 1.0 | 0.9 | IPF1428   | 15052039..Similar to ubiquitinatio orf19.6054  | 1428  | CaCIS2    | Amino acid transferase activity                                                                                     |
| CA4915 | 0.9 | 1.0 | 1.0 | IPF1427   | 15054729..Similar to ubiquitinatio orf19.6055  | 1427  | IPF1428   | PROTEIN FATE [folding modification destination]                                                                     |
| CA4916 | 1.0 | 0.9 | 0.9 | IPF1425   | complemer Hypothetical phosphog orf19.6056     | 1425  | IPF1427   | PROTEIN FATE [folding modification destination]                                                                     |
| CA4917 | 0.8 | 0.8 | 0.9 | ECM31     | complemer Involved in cell wall bic orf19.6057 | 1424  | IPF1425   | C-compour molecular_function unknown                                                                                |
| CA4918 | 1.0 | 1.0 | 0.8 | GLO1      | 15059618..Glyoxalase I (by homo orf19.6058     | 1422  | CaECM31   | Metabolism transferase activity                                                                                     |
| CA4919 | 1.4 | 1.2 | 1.5 | TTR1      | 15060920..Glutaredoxin (by homo orf19.6059     | 1421  | CaGLO1    | Amino acid lyase activity                                                                                           |
| CA4920 | 1.1 | 1.1 | 1.1 | GCN20     | 15061459..Positive effector of Gcr orf19.6060  | 1420  | CaTTR1    | Nucleotide transferase activity, oxidoreductase activity                                                            |
| CA4921 | 1.0 | 1.0 | 1.0 | IPF1416   | 15063906..unknown function orf19.6061          | 1416  | CaGCN20   | PROTEIN † molecular_function unknown                                                                                |
| CA4922 | 1.1 | 1.0 | 0.9 | IPF1415   | complemer unknown function orf19.6062          | 1415  | IPF1416   | UNCLASSI molecular_function unknown                                                                                 |
| CA4923 | 0.8 | 0.8 | 0.8 | IPF1413.3 | 15066196..unknown function, 3-prime end        | 1413  | IPF1415   | UNCLASSI molecular_function unknown                                                                                 |
| CA4924 | 0.9 | 0.8 | 1.0 | UBP6.3    | complemer Ubiquitin-specific prote orf19.6063  | 1412  | IPF1413.3 | CLASSIFIC molecular_function unknown                                                                                |
| CA4925 | 0.9 | 1.0 | 1.0 | IPF1408   | complemer unknown function orf19.6064          | 1408  | CaUBP6.3  | PROTEIN I peptidase activity                                                                                        |
| CA4926 | 1.0 | 1.0 | 1.1 | IPF1404   | complemer unknown function orf19.6065          | 1404  | IPF1408   | UNCLASSI molecular_function unknown                                                                                 |
| CA4927 | 0.9 | 0.9 | 0.8 | IPF1401   | 15072963..similarity to aldehyde corf19.6066   | 1401  | IPF1404   | C-compound and carbohydrate metabolism ENERGY TRANSCRIPTION CELL FATE SUBCELLULAR LOCALISATION                      |
| CA4928 | 1.0 | 0.9 | 1.1 | IPF1399   | complemer unknown function orf19.6068          | 1399  | IPF1401   | CLASSIFIC molecular_function unknown                                                                                |
| CA4929 | 0.4 | 0.4 | 0.3 | ENA22     | complemer P-type ATPase involve orf19.6070     | 1398  | IPF1399   | UNCLASSI molecular_function unknown                                                                                 |
| CA4930 | 1.0 | 1.1 | 1.1 | IPF8381   | 15082213..similar to Saccharomy orf19.6071     | 8381  | CaENA22   | REGULATI transporter activity                                                                                       |
| CA4931 | 0.9 | 0.8 | 1.0 | IPF8378   | complemer unknown function orf19.6072          | 8378  | IPF8381   | CELL CYC transferase activity                                                                                       |
| CA4932 | 2.1 | 2.1 | 1.9 | IPF8374   | 15087606..unknown function orf19.6073          | 8374  | IPF8378   | No significant S.c. match                                                                                           |
| CA4933 | 1.0 | 0.8 | 0.9 | IPF8372   | complemer unknown function orf19.6074          | 8372  | IPF8374   | Metabolism oxidoreductase activity                                                                                  |
| CA4934 | 0.9 | 1.1 | 1.0 | CDC36     | 15089444..transcription factor (by orf19.6075  | 8371  | IPF8372   | UNCLASSI molecular_function unknown                                                                                 |
| CA4935 | 1.0 | 1.0 | 0.9 | VPS29     | complemer vacuolar protein sortin orf19.6076   | 8370  | CaCDC36   | CELL CYC RNA binding                                                                                                |
| CA4936 | 1.3 | 1.4 | 1.4 | IPF8369   | complemer unknown function orf19.1349          | 8369  | CaVPS29   | PROTEIN I molecular_function unknown                                                                                |
| CA4937 | 1.2 | 1.1 | 1.1 | TFP3      | complemer H+-ATPase by homolo orf19.6538       | 5167  | IPF8369   | UNCLASSI molecular_function unknown                                                                                 |
| CA4938 | 1.2 | 1.0 | 1.2 | IPF5166   | 15094986..unknown function orf19.6537          | 5166  | CaTFP3    | PROTEIN I transporter activity                                                                                      |
| CA4939 | 1.1 | 1.1 | 1.1 | IQG1      | 15096398..RAS GTPase-activatin orf19.6536      | 5165  | IPF5166   | UNCLASSI molecular_function unknown                                                                                 |
| CA4940 | 0.8 | 0.8 | 0.7 | CRN1.3F   | complemer actin-binding protein, 3 orf19.6535  | 5163  | CaIQG1    | CELL CYC protein binding                                                                                            |
| CA4941 | 0.9 | 0.9 | 1.0 | CRN1.53F  | complemer actin-binding protein, 5-prime end   | 5160  | CaCRN1.3  | No significant S.c. match                                                                                           |
| CA4943 | 0.9 | 0.9 | 0.8 | IPF5158   | complemer unknown function orf19.6534          | 5158  | CaCRN1.5  | SUBCELL protein binding                                                                                             |
| CA4944 | 0.9 | 1.0 | 1.0 | MSK1      | 15104388..lysyl-tRNA synthetase orf19.6533     | 5156  | IPF5158   | No significant S.c. match                                                                                           |
| CA4945 | 0.8 | 0.7 | 0.9 | FLX1      | complemer MITOCHONDRIAL FA orf19.6532          | 5154  | CaMSK1    | PROTEIN † ligase activity                                                                                           |
| CA4946 | 0.9 | 1.1 | 1.1 | TOM71     | complemer Translocase of the outer mitochon    | 5151  | CaFLX1    | Metabolism transporter activity                                                                                     |
| CA4947 | 0.9 | 0.9 | 0.8 | NUC2      | 15108686..NADH-UBIQUINONE (orf19.6531          | 5150  | CaTOM71   | PROTEIN I transporter activity                                                                                      |
| CA4948 | 0.9 | 0.8 | 0.8 | IPF5149   | complemer unknown function orf19.6530          | 5149  | CaNUC2    | No significant S.c. match                                                                                           |
| CA4949 | 1.0 | 1.3 | 0.9 | CDC34     | 15113037..Ubiquitin-conjugating e orf19.6529   | 5145  | IPF5149   | PROTEIN FATE [folding modification destination] ""CELLULAR TRANSPORT AND TRANSPORT MECHANISMS SUBCELLULAR LOCAL     |
| CA4950 | 1.0 | 1.0 | 1.1 | IPF5143   | complemer Unknown function orf19.6528          | 5143  | CaCDC34   | Amino acid ligase activity                                                                                          |
| CA4951 | 1.0 | 0.9 | 1.2 | IPF13607  | complemer unknown function orf19.6527          | 13607 | IPF5143   | No significant S.c. match                                                                                           |
| CA4952 | 1.0 | 0.9 | 1.1 | IPF13609  | 15120425..unknown function orf19.6526          | 13609 | IPF13607  | UNCLASSI molecular_function unknown                                                                                 |
| CA4953 | 1.0 | 1.0 | 1.0 | IPF4567.3 | 15121764..unknown function, 3-pr orf19.6525    | 4567  | IPF13609  | UNCLASSI molecular_function unknown                                                                                 |
| CA4954 | 0.9 | 0.9 | 0.8 | TOM40     | complemer mitochondrial import re orf19.6524   | 4568  | IPF4567.3 | No significant S.c. match                                                                                           |
| CA4955 | 0.8 | 0.9 | 0.7 | IPF4580   | complemer putative allantatoate per orf19.6522 | 4580  | CaTOM40   | PROTEIN I transporter activity                                                                                      |
| CA4956 | 0.9 | 0.9 | 1.0 | IPF4583   | complemer putative allantatoate per orf19.6520 | 4583  | IPF4580   | TRANSPORT FACILITATION                                                                                              |

|        |     |     |     |          |                                               |            |       |            |                                                                                                                      |
|--------|-----|-----|-----|----------|-----------------------------------------------|------------|-------|------------|----------------------------------------------------------------------------------------------------------------------|
| CA4957 | 1.0 | 1.0 | 0.9 | IPF4588  | complemer putative aldehyde dehydrogenase     | orf19.6518 | 4588  | IPF4583    | TRANSPORTEIN                                                                                                         |
| CA4958 | 1.0 | 1.0 | 1.0 | RAD14    | 15140020..nucleotide excision repair          | orf19.6517 | 4591  | IPF4588    | CLASSIFICATION NOT YET CLEAR-CUT                                                                                     |
| CA4959 | 0.5 | 0.4 | 0.5 | HSP90    | 15141513..heat shock protein                  | orf19.6515 | 4596  | CaRAD14    | CELL CYCLE DNA BINDING                                                                                               |
| CA4960 | 1.1 | 1.1 | 0.8 | IPF3912  | complemer unknown function                    | orf19.6514 | 3912  | CaHSP90    | CELL RES CHAPERONE ACTIVITY                                                                                          |
| CA4961 | 1.1 | 1.1 | 1.0 | IPF3916  | complemer similar to Saccharomyces cerevisiae | orf19.6512 | 3916  | IPF3912    | TRANSCRIPTION REGULATOR ACTIVITY                                                                                     |
| CA4962 | 1.1 | 1.0 | 1.0 | TRL1     | 15160208..tRNA ligase                         | orf19.6511 | 3918  | IPF3916    | CELLULAR PROTEIN BINDING                                                                                             |
| CA4963 | 0.9 | 1.0 | 1.0 | IPF3919  | 15162982..unknown function                    | orf19.6510 | 3919  | CaTRL1     | TRANSCRIPTION REGULATOR ACTIVITY                                                                                     |
| CA4964 | 1.2 | 1.0 | 1.1 | IPF3920  | 15163666..unknown function                    | orf19.6509 | 3920  | IPF3919    | CELL RESCUE DEFENSE AND VIRULENCE                                                                                    |
| CA4965 | 1.0 | 1.0 | 0.9 | IPF3921  | complemer unknown function                    | orf19.6508 | 3921  | IPF3920    | Nucleotide metabolism ""CELL RESCUE DEFENSE AND VIRULENCE ""SUBCELLULAR LOCALISATION                                 |
| CA4966 | 1.9 | 1.3 | 1.4 | IPF3923  | 15165775..unknown function                    | orf19.6507 | 3923  | IPF3921    | CELLULAR TRANSPORTER ACTIVITY                                                                                        |
| CA4967 | 1.1 | 1.1 | 1.0 | IPF3927  | 15167052..unknown function                    | orf19.6506 | 3927  | IPF3923    | PROTEIN SYNTHESIS ""PROTEIN FATE [folding modification destination] ""SUBCELLULAR LOCALISATION UNCLASSIFIED PROTEIN: |
| CA4968 | 1.0 | 1.0 | 1.0 | IPF3928  | complemer unknown function                    | orf19.6503 | 3928  | IPF3927    | UNCLASSIFIED PROTEIN                                                                                                 |
| CA4969 | 1.0 | 0.9 | 1.0 | IPF3930  | 15170109..unknown function                    | orf19.6502 | 3930  | IPF3928    | No significant S.c. match                                                                                            |
| CA4970 | 1.0 | 0.9 | 1.0 | IPF4696  | 15175492..unknown function                    | orf19.5282 | 4696  | IPF3930    | CELL CYCLE molecular_function unknown                                                                                |
| CA4971 | 1.0 | 0.9 | 1.2 | IPF4697  | 15177526..similar to Saccharomyces cerevisiae | orf19.5281 | 4697  | IPF4696    | UNCLASSIFIED PROTEINS                                                                                                |
| CA4972 | 1.0 | 1.0 | 1.1 | MUP1     | 15182420..High affinity methionine            | orf19.5280 | 4701  | IPF4697    | CELL CYCLE RNA BINDING                                                                                               |
| CA4973 | 1.0 | 0.9 | 1.0 | IPF4703  | 15184424..unknown function                    | orf19.5279 | 4703  | CaMUP1     | Amino acid transporter activity                                                                                      |
| CA4974 | 1.0 | 0.9 | 1.0 | IPF4704  | 15185345..unknown function                    | orf19.5278 | 4704  | IPF4703    | UNCLASSIFIED structural_molecule activity                                                                            |
| CA4975 | 1.0 | 1.0 | 1.1 | IPF4706  | complemer unknown function                    | orf19.5277 | 4706  | IPF4704    | UNCLASSIFIED molecular_function unknown                                                                              |
| CA4976 | 0.9 | 1.0 | 1.0 | IPF4708  | 15188026..unknown function                    | orf19.5276 | 4708  | IPF4706    | Nucleotide molecular_function unknown                                                                                |
| CA4977 | 1.0 | 0.9 | 1.1 | IPF4710  | 15189601..unknown function                    | orf19.5275 | 4710  | IPF4708    | UNCLASSIFIED protein binding                                                                                         |
| CA4978 | 1.0 | 0.9 | 1.0 | IPF2065  | 15193003..unknown function                    | orf19.5274 | 2065  | IPF4710    | UNCLASSIFIED molecular_function unknown                                                                              |
| CA4979 | 1.1 | 1.0 | 1.0 | IPF2062  | complemer unknown function                    | orf19.5271 | 2062  | IPF2065    | UNCLASSIFIED molecular_function unknown                                                                              |
| CA4980 | 1.1 | 1.1 | 1.0 | IPF2059  | 15199221..unknown function                    | orf19.5270 | 2059  | IPF2062    | Nucleotide metabolism CELL CYCLE AND DNA PROCESSING CELLULAR COMMUNICATION/SIGNAL TRANSDUCTION MECHANISM             |
| CA4981 | 0.8 | 0.5 | 1.0 | IPF2057  | complemer unknown function                    | orf19.5269 | 2057  | IPF2059    | UNCLASSIFIED PROTEINS                                                                                                |
| CA4982 | 1.0 | 1.0 | 1.0 | NUT2     | 15203161..Negative transcription              | orf19.5268 | 2054  | IPF2057    | No significant S.c. match                                                                                            |
| CA4983 | 0.9 | 0.8 | 1.0 | IPF2053  | 15206221..unknown function                    | orf19.5267 | 2053  | CaNUT2     | TRANSCRIPTION REGULATOR ACTIVITY                                                                                     |
| CA4984 | 0.9 | 1.0 | 1.0 | IPF2052  | complemer unknown function                    | orf19.5266 | 2052  | IPF2053    | No significant S.c. match                                                                                            |
| CA4985 | 1.0 | 1.1 | 1.0 | IPF2050  | complemer similar to Saccharomyces cerevisiae | orf19.5265 | 2050  | IPF2052    | No significant S.c. match                                                                                            |
| CA4986 | 1.0 | 0.9 | 1.0 | SER33    | 15215166..Phosphoglycerate dehydrogenase      | orf19.5263 | 2046  | IPF2050    | CELL CYCLE motor activity,structural_molecule activity                                                               |
| CA4987 | 0.9 | 0.9 | 1.0 | IPF2045  | 15216737..unknown function                    | orf19.5262 | 2045  | CaSER33    | Amino acid oxidoreductase activity                                                                                   |
| CA4988 | 1.1 | 1.0 | 1.1 | RPN2     | 15217609..Proteasome regulatory               | orf19.5260 | 2043  | IPF2045    | No significant S.c. match                                                                                            |
| CA4989 | 1.0 | 0.9 | 0.9 | IPF2041  | complemer unknown function                    | orf19.5259 | 2041  | CaRPN2     | TRANSCRIPTION peptidase activity,signal transducer activity                                                          |
| CA4990 | 1.0 | 0.9 | 1.0 | IPF2039  | complemer unknown function                    | orf19.5258 | 2039  | IPF2041    | No significant S.c. match                                                                                            |
| CA4991 | 1.0 | 1.0 | 1.0 | LCB4     | 15224113..Sphingolipid long chain             | orf19.5257 | 2037  | IPF2039    | No significant S.c. match                                                                                            |
| CA4992 | 1.0 | 0.9 | 0.9 | IPF2036  | complemer unknown function                    | orf19.5256 | 2036  | CaLCB4     | Lipid fatty-acid and isoprenoid metabolism                                                                           |
| CA4993 | 1.0 | 0.9 | 0.9 | PXA2     | complemer ABC transporter, peroxisomal        | orf19.5255 | 2034  | IPF2036    | CELLULAR TRANSPORT AND TRANSPORT MECHANISMS SUBCELLULAR LOCALISATION                                                 |
| CA4994 | 1.0 | 0.8 | 1.0 | IPF2033  | complemer unknown function                    | orf19.5254 | 2033  | CaPXA2     | Lipid fatty-acid transporter activity,hydrolase activity                                                             |
| CA4995 | 1.0 | 1.0 | 0.9 | YAK1     | 15230847..Ser/thr protein kinase              | orf19.5253 | 2032  | IPF2033    | No significant S.c. match                                                                                            |
| CA4996 | 0.9 | 1.0 | 1.0 | IPF2029  | complemer unknown function                    | orf19.5251 | 2029  | CaYAK1     | CELL CYCLE AND DNA PROCESSING SUBCELLULAR LOCALISATION                                                               |
| CA4997 | 1.0 | 1.0 | 0.9 | IPF2027  | 15235858..unknown function                    | orf19.5250 | 2027  | IPF2029    | TRANSCRIPTION ""CELL RESCUE DEFENSE AND VIRULENCE ""SUBCELLULAR LOCALISATION                                         |
| CA4998 | 1.1 | 0.8 | 1.0 | IPF2026  | complemer unknown function                    | orf19.5249 | 2026  | IPF2027    | No significant S.c. match                                                                                            |
| CA4999 | 1.0 | 1.0 | 1.1 | IPF2024  | 15237770..unknown function                    | orf19.5248 | 2024  | IPF2026    | No significant S.c. match                                                                                            |
| CA5000 | 0.9 | 0.8 | 1.0 | IPF2023  | complemer unknown function                    | orf19.5247 | 2023  | IPF2024    | CELLULAR molecular_function unknown                                                                                  |
| CA5001 | 0.8 | 0.9 | 0.9 | IPF2022  | complemer unknown function                    | orf19.5246 | 2022  | IPF2023    | UNCLASSIFIED molecular_function unknown                                                                              |
| CA5002 | 1.0 | 1.0 | 1.0 | IPF2021  | 15241490..unknown function                    | orf19.5245 | 2021  | IPF2022    | No significant S.c. match                                                                                            |
| CA5003 | 1.0 | 1.0 | 1.0 | MCD4     | 15243972..Sporulation protein (by             | orf19.5244 | 2019  | IPF2021    | PROTEIN FATE [folding modification destination]                                                                      |
| CA5004 | 1.0 | 1.0 | 1.1 | TRP3     | 15247113..Anthranilate synthase               | orf19.5243 | 2018  | CaMCD4     | CELL FATE molecular_function unknown                                                                                 |
| CA5005 | 1.2 | 1.2 | 1.1 | CDC62    | 15249204..Cell division control protein (by   | orf19.5241 | 18149 | CaTRP3     | Amino acid lyase activity                                                                                            |
| CA5006 | 1.1 | 1.2 | 1.1 | IPF12584 | 15251820..unknown function                    | orf19.5241 | 12584 | CaCDC62    | No significant S.c. match                                                                                            |
| CA5007 | 0.8 | 0.8 | 1.0 | IPF12579 | complemer putative phospholipase              | orf19.5239 | 12579 | IPF12584   | UNCLASSIFIED hydrolase activity                                                                                      |
| CA5008 | 1.0 | 1.0 | 1.0 | IPF12577 | complemer unknown function                    | orf19.5238 | 12577 | IPF12579   | Lipid fatty-acid molecular_function unknown                                                                          |
| CA5009 | 0.9 | 1.0 | 1.1 | VPH2     | 15259729..H+-ATPase assembly                  | orf19.5237 | 13946 | IPF12577   | No significant S.c. match                                                                                            |
| CA5010 | 1.1 | 1.0 | 1.0 | IPF13945 | 15260525..Unknown function                    | orf19.5236 | 13945 | CaVPH2     | PROTEIN I molecular_function unknown                                                                                 |
| CA5011 | 1.0 | 1.0 | 1.0 | IPF13944 | 15260959..unknown function                    | orf19.5236 | 13944 | IPF13945   | PROTEIN FATE [folding modification destination] ""CONTROL OF CELLULAR ORGANIZATION                                   |
| CA5012 | 0.9 | 1.0 | 1.0 | IPF13943 | complemer Unknown function                    | orf19.5235 | 13943 | IPF13944   | PROTEIN FATE [folding modification destination] ""CONTROL OF CELLULAR ORGANIZATION                                   |
| CA5013 | 1.1 | 1.2 | 1.0 | IPF13941 | complemer Unknown function                    | orf19.5234 | 13941 | IPF13943   | No significant S.c. match                                                                                            |
| CA5014 | 0.9 | 1.0 | 1.0 | IPF11120 | complemer similar to Saccharomyces cerevisiae | orf19.6966 | 11120 | IPF13941   | SUBCELLULAR LOCALISATION TRANSPORT FACILITATION                                                                      |
| CA5015 | 1.1 | 1.1 | 1.0 | IPF11118 | 15275852..unknown function                    | orf19.6967 | 11118 | IPF11120   | Lipid fatty-acid transferase activity                                                                                |
| CA5016 | 1.0 | 0.9 | 1.2 | IPF7561  | 15282767..unknown function                    | orf19.6968 | 7561  | IPF11118   | CELLULAR TRANSPORT AND TRANSPORT MECHANISMS SUBCELLULAR LOCALISATION                                                 |
| CA5017 | 1.0 | 1.1 | 1.0 | IPF7559  | complemer unknown function                    | orf19.6970 | 7559  | IPF7561    | No significant S.c. match                                                                                            |
| CA5018 | 1.0 | 0.9 | 0.9 | IPF7558  | 15287768..unknown function                    | orf19.6971 | 7558  | IPF7559    | UNCLASSIFIED PROTEINS                                                                                                |
| CA5019 | 1.0 | 0.9 | 0.9 | IPF7557  | complemer similar to Saccharomyces cerevisiae | orf19.6972 | 7557  | IPF7558    | C-compound transferase activity                                                                                      |
| CA5020 | 1.0 | 0.9 | 0.9 | IPF7556  | complemer similar to Saccharomyces cerevisiae | orf19.6973 | 7556  | IPF7557    | C-compound and carbohydrate metabolism SUBCELLULAR LOCALISATION                                                      |
| CA5021 | 1.5 | 1.9 | 1.1 | YST1,EXO | complemer Ribosomal protein, exc              | orf19.6975 | 7549  | IPF7556    | TRANSCRIPTION ""PROTEIN FATE [folding modification destination] ""SUBCELLULAR LOCALISATION                           |
| CA5023 | 1.0 | 1.0 | 0.9 | IPF7547  | complemer unknown function                    | orf19.6976 | 7547  | CaYST1,exo | PROTEIN I structural_molecule activity                                                                               |
| CA5024 | 0.8 | 0.8 | 1.0 | IPF3009  | complemer similar to Saccharomyces cerevisiae | orf19.6977 | 3009  | IPF7547    | UNCLASSIFIED molecular_function unknown                                                                              |
| CA5025 | 1.2 | 1.0 | 1.1 | AMI3     | 15306272..protein required for                | orf19.6979 | 3003  | IPF3009    | Lipid fatty-acid molecular_function unknown                                                                          |
| CA5026 | 1.0 | 0.9 | 1.0 | IPF3001  | 15310230..serine/threonine protei             | orf19.6980 | 3001  | CaAMI3     | UNCLASSIFIED molecular_function unknown                                                                              |
| CA5027 | 1.0 | 0.9 | 1.0 | IPF2999  | 15312312..unknown function                    | orf19.6981 | 2999  | IPF3001    | CELL RESCUE DEFENSE AND VIRULENCE                                                                                    |
| CA5028 | 1.0 | 1.0 | 1.1 | IPF2998  | complemer unknown function                    | orf19.6982 | 2998  | IPF2999    | UNCLASSIFIED molecular_function unknown                                                                              |
| CA5029 | 1.1 | 1.1 | 0.9 | IPF2997  | complemer unknown function                    | orf19.6983 | 2997  | IPF2998    | UNCLASSIFIED molecular_function unknown                                                                              |

|        |     |     |     |           |                                     |             |       |           |                                                       |                                                               |
|--------|-----|-----|-----|-----------|-------------------------------------|-------------|-------|-----------|-------------------------------------------------------|---------------------------------------------------------------|
| CA5030 | 1.0 | 1.0 | 1.0 | IPF2988   | 15331189..unknown function          | orf19.6984  | 2988  | IPF2987   | C-compound and carbohydrate metabolism                | TRANSCRIPTION SUBCELLULAR LOCALISATION                        |
| CA5031 | 1.0 | 1.0 | 1.0 | IPF20023  | 15333873..similar to Saccharomy     | orf19.6985  | 20023 | IPF2988   | UNCLASSIFIED PROTEINS                                 |                                                               |
| CA5032 | 1.0 | 1.0 | 1.0 | IPF2982   | 15338446..unknown function          | orf19.6986  | 2982  | IPF20023  | TRANSCR DNA binding                                   |                                                               |
| CA5033 | 1.0 | 1.2 | 1.1 | DNM1      | complemer Dynamin-related protei    | orf19.6987  | 2980  | IPF2982   | UNCLASSIFIED PROTEINS                                 |                                                               |
| CA5034 | 1.2 | 1.0 | 1.1 | OST1      | 15344570..oligosaccharyltransfer    | orf19.6988  | 4532  | CaDNM1    | SUBCELL hydrolyase activity                           |                                                               |
| CA5035 | 1.0 | 1.0 | 1.0 | IPF4531   | complemer unknown function          | orf19.6989  | 4531  | CaOST1    | C-compour transferase activity                        |                                                               |
| CA5036 | 1.0 | 1.0 | 1.0 | CYP52     | complemer Peptidyl-prolyl cis-trans | orf19.6990  | 4530  | IPF4531   | CLASSIFICATION NOT YET CLEAR-CUT                      |                                                               |
| CA5037 | 1.4 | 1.3 | 1.2 | PRE3      | 15347635..20S proteasome subur      | orf19.6991  | 4529  | CaCYP52   | PROTEIN FATE [folding modification destination] ""    | SUBCELLULAR LOCALISATION                                      |
| CA5038 | 1.0 | 1.0 | 1.0 | QDR2      | 15349554..putative antibiotic resis | orf19.6992  | 4526  | CaPRE3    | PROTEIN Ipeptidase activity                           |                                                               |
| CA5039 | 0.6 | 0.6 | 0.4 | GAP2      | complemer general amino acid per    | orf19.6993  | 4523  | CaQDR2    | CELL RESCUE DEFENSE AND VIRULENCE ""                  | TRANSPORT FACILITATION                                        |
| CA5040 | 1.1 | 1.1 | 1.1 | BAT22     | complemer branched chain amino      | orf19.6994  | 4517  | CaGAP2    | Amino acid transporter activity                       |                                                               |
| CA5041 | 1.0 | 1.0 | 1.0 | FRP7      | 15357526..member of the FRP far     | orf19.6995  | 4516  | CaBAT22   | Amino acid metabolism                                 | SUBCELLULAR LOCALISATION                                      |
| CA5042 | 1.1 | 1.0 | 0.9 | IPF4514   | 15359151..putative alpha-1,3-mar    | orf19.6996  | 4514  | CaFRP7    | C-compound and carbohydrate metabolism                |                                                               |
| CA5043 | 1.0 | 1.1 | 1.1 | FRP4      | 15361837..member of the FRP far     | orf19.6997  | 4513  | IPF4514   | C-compound and carbohydrate metabolism                | ""PROTEIN FATE [folding modification destination] ""          |
| CA5044 |     |     |     | GTT2      | 15363476..15364279                  |             |       | CaFRP4    | C-compound and carbohydrate metabolism                |                                                               |
| CA5045 | 1.1 | 0.9 | 0.9 | IPF4510   | 15364750..unknown function          | orf19.6999  | 4510  |           |                                                       |                                                               |
| CA5046 | 1.1 | 1.3 | 1.0 | YCK2      | 15368249..casein kinase I (by hor   | orf19.7001  | 4506  | IPF4510   | CELL RESCUE DEFENSE AND VIRULENCE                     |                                                               |
| CA5047 | 0.9 | 1.0 | 1.0 | IPF4504   | complemer unknown function          | orf19.7002  | 4504  | CaYCK2    | CELL CYC protein kinase activity                      |                                                               |
| CA5048 | 1.0 | 1.0 | 1.0 | IPF20024  | complemer unknown function          | orf19.10531 | 20024 | IPF4504   | No significant S.c. match                             |                                                               |
| CA5049 | 1.2 | 1.2 | 1.0 | IPF3714   | complemer similar to Saccharomy     | orf19.3013  | 3714  | IPF20024  | TRANSCR transcription regulator activity              |                                                               |
| CA5050 | 1.7 | 3.0 | 1.5 | BMH2      | complemer similar to Saccharomy     | orf19.3014  | 3712  | IPF3714   | C-compour structural molecule activity                |                                                               |
| CA5051 | 0.9 | 0.9 | 0.7 | IPF3709   | complemer unknown function          | orf19.3015  | 3709  | CaBMH2    | CELL CYC protein binding,DNA binding                  |                                                               |
| CA5052 | 1.0 | 1.0 | 1.1 | IPF3708   | 15385817..unknown function          | orf19.3016  | 3708  | IPF3709   | UNCLASSI molecular_function unknown                   |                                                               |
| CA5053 | 0.9 | 1.0 | 1.0 | IPF3707   | complemer unknown function          | orf19.3018  | 3707  | IPF3708   | No significant S.c. match                             |                                                               |
| CA5054 | 0.9 | 0.9 | 1.0 | IPF3704   | 15387676..unknown function          | orf19.3019  | 3704  | IPF3707   | UNCLASSI DNA binding,transcription regulator activity |                                                               |
| CA5055 | 0.8 | 0.9 | 0.8 | IPF3701   | 15390160..unknown function          | orf19.3021  | 3701  | IPF3704   | CELL CYC helicase activity                            |                                                               |
| CA5056 | 0.9 | 1.0 | 1.0 | IPF3698   | 15391444..similar to Saccharomy     | orf19.3022  | 3698  | IPF3701   | UNCLASSI molecular_function unknown                   |                                                               |
| CA5057 | 0.9 | 0.9 | 1.0 | IPF3695   | 15392660..similar to Saccharomy     | orf19.3023  | 3695  | IPF3698   | PROTEIN :structural molecule activity                 |                                                               |
| CA5058 |     |     |     | MAS1      | complement(15394649..15396052)      |             |       | IPF3695   | C-compour transcription regulator activity            |                                                               |
| CA5059 | 1.0 | 1.0 | 1.0 | IPF3691   | 15396512..unknown function          | orf19.3027  | 3691  |           |                                                       |                                                               |
| CA5060 | 0.9 | 0.9 | 0.9 | IPF3690   | complemer unknown function          | orf19.3029  | 3690  | IPF3691   | SUBCELLULAR LOCALISATION                              |                                                               |
| CA5061 | 1.0 | 0.8 | 0.9 | IPF8495   | complemer unknown function          | orf19.3030  | 8495  | IPF3690   | CLASSIFIC hydrolyase activity                         |                                                               |
| CA5062 | 1.1 | 1.0 | 1.1 | SEC62     | complemer subunit of ER protein-t   | orf19.3031  | 8494  | IPF8495   | UNCLASSIFIED PROTEINS                                 |                                                               |
| CA5063 | 0.9 | 0.9 | 0.9 | IPF8493   | complemer putative member of no     | orf19.3034  | 8493  | CaSEC62   | PROTEIN I protein binding                             |                                                               |
| CA5064 | 0.7 | 0.7 | 0.7 | CHD1      | 15407747..transcriptional regulato  | orf19.3035  | 8489  | IPF8493   | TRANSPO transporter activity                          |                                                               |
| CA5065 | 0.6 | 0.9 | 0.6 | IPF3584   | 15412520..similar to Saccharomy     | orf19.3037  | 3584  | CaCHD1    | TRANSCR transcription regulator activity              |                                                               |
| CA5066 | 1.0 | 1.4 | 0.7 | TPS2      | 15415493..Threolose-6-phosphats     | orf19.3038  | 3588  | IPF3584   | TRANSCR RNA binding                                   |                                                               |
| CA5067 | 1.0 | 1.0 | 1.0 | IPF3589   | 15418999..putative alcohol acyl tr  | orf19.3040  | 3589  | CaTPS2    | C-compour hydrolyase activity                         |                                                               |
| CA5068 | 1.0 | 1.0 | 1.1 | IPF3592   | 15421573..unknown function          | orf19.3041  | 3592  | IPF3589   | CLASSIFIC molecular_function unknown                  |                                                               |
| CA5069 | 1.0 | 0.9 | 0.9 | IPF3593   | 15423778..unknown function          | orf19.3042  | 3593  | IPF3592   | UNCLASSI molecular_function unknown                   |                                                               |
| CA5070 | 0.9 | 0.9 | 1.0 | IPF3594   | 15425647..triglyceride lipase (by   | orf19.3043  | 3594  | IPF3593   | No significant S.c. match                             |                                                               |
| CA5071 | 0.9 | 0.9 | 1.0 | IPF3597   | complemer similar to Saccharomy     | orf19.3045  | 3597  | IPF3594   | Lipid fatty-:hydrolyase activity                      |                                                               |
| CA5072 | 1.0 | 1.1 | 1.1 | IPF3598   | complemer similar to Saccharomy     | orf19.3047  | 3598  | IPF3597   | CLASSIFICATION NOT YET CLEAR-CUT                      |                                                               |
| CA5073 | 0.8 | 0.7 | 0.9 | IPF3603   | complemer unknown function          | orf19.3048  | 3603  | IPF3598   | C-compour transcription regulator activity            |                                                               |
| CA5074 | 1.1 | 1.0 | 1.1 | IPF3607   | complemer putative serine/threoni   | orf19.3049  | 3607  | IPF3603   | No significant S.c. match                             |                                                               |
| CA5075 | 1.1 | 1.1 | 1.2 | IPF3610   | complemer unknown function          | orf19.3050  | 3610  | IPF3607   | CELL CYC protein kinase activity                      |                                                               |
| CA5076 | 1.1 | 0.9 | 1.0 | IPF15301  | 15442825..unknown function          | orf19.3051  | 15301 | IPF3610   | UNCLASSI enzyme regulator activity                    |                                                               |
| CA5077 | 1.0 | 1.2 | 1.2 | YPT1      | 15444263..GTP-binding protein of    | orf19.3052  | 15299 | IPF15301  | UNCLASSI molecular_function unknown                   |                                                               |
| CA5078 | 1.0 | 1.1 | 1.1 | IPF15297  | complemer unknown function          | orf19.3053  | 15297 | CaYPT1    | CELLULAF hydrolyase activity                          |                                                               |
| CA5079 | 1.1 | 1.1 | 1.1 | RPN3      | 15446623..26S proteasome reguli     | orf19.3054  | 9265  | IPF15297  | No significant S.c. match                             |                                                               |
| CA5080 | 0.9 | 0.9 | 0.9 | IPF9268.3 | 15448391..similar to Saccharomy     | orf19.3055  | 9268  | CaRPN3    | PROTEIN I peptidase activity                          |                                                               |
| CA5081 | 1.2 | 1.4 | 1.4 | COQ6      | complemer monoxygenase (by h        | orf19.3058  | 9273  | IPF9268.3 | TRANSCR transcription regulator activity              |                                                               |
| CA5082 | 1.1 | 1.1 | 1.1 | SUA70     | complemer TFIIIB subunit (transcri  | orf19.3059  | 9274  | CaCOQ6    | Metabolism oxidoreductase activity                    |                                                               |
| CA5083 | 1.0 | 1.1 | 1.1 | IPF9278   | 15455618..similar to Saccharomy     | orf19.3060  | 9278  | CaSUA70   | TRANSCR transcription regulator activity              |                                                               |
| CA5084 | 1.0 | 0.9 | 1.0 | IMP1      | complemer protease, mitochondria    | orf19.3061  | 9279  | IPF9278   | C-compour transferase activity                        |                                                               |
| CA5085 | 1.2 | 1.0 | 1.1 | RPS22.EX1 | complemer ribosomal protein S15a,   | exon 2 (b   | 9280  | CaIMP1    | PROTEIN I peptidase activity                          |                                                               |
| CA5087 | 0.5 | 0.3 | 0.8 | IPF20025  | complemer unknown function          | orf19.3062  | 20025 | CaRPS22.1 | PROTEIN SYNTHESIS SUBCELLULAR LOCALISATION            |                                                               |
| CA5088 | 1.0 | 1.2 | 1.0 | IPF9758   | complemer similar to Saccharomy     | orf19.3063  | 9758  | IPF20025  | CELL RES molecular_function unknown                   |                                                               |
| CA5089 | 1.0 | 1.1 | 1.0 | MRPL27    | complemer ribosomal protein (by h   | orf19.3064  | 9757  | IPF9758   | CELL CYC nucleotidyltransferase activity              |                                                               |
| CA5090 | 0.7 | 0.6 | 0.9 | IFG4      | complemer probable d-amino acid     | orf19.3065  | 9755  | CaMRPL27  | PROTEIN :structural molecule activity                 |                                                               |
| CA5091 | 0.9 | 0.7 | 1.0 | ACF3      | 15467452..endo-1,3-beta-glucana     | orf19.1058  | 9751  | CaIFG4    | No significant S.c. match                             |                                                               |
| CA5092 | 1.0 | 1.1 | 1.0 | IPF1394   | complemer unknown function          | orf19.6450  | 1394  | CaACF3    | CLASSIFIC hydrolyase activity                         |                                                               |
| CA5093 | 1.0 | 0.9 | 1.0 | IPF1390   | complemer unknown function          | orf19.6449  | 1390  | IPF1394   | No significant S.c. match                             |                                                               |
| CA5094 | 1.1 | 1.0 | 1.0 | IPF1387   | complemer unknown function          | orf19.6448  | 1387  | IPF1390   | No significant S.c. match                             |                                                               |
| CA5095 | 1.1 | 1.1 | 1.1 | ARF21     | 15479458..GTP-binding protein of    | orf19.6447  | 1386  | IPF1387   | No significant S.c. match                             |                                                               |
| CA5096 | 1.0 | 0.9 | 0.9 | IPF1384   | 15480233..similar to Saccharomy     | orf19.6445  | 1384  | CaARF21   | PROTEIN FATE [folding modification destination] ""    | CELLULAR TRANSPORT AND TRANSPORT MECHANISMS CONTROL OF CELLUL |
| CA5097 | 0.8 | 0.9 | 0.8 | IPF1382   | 15481253..unknown function          | orf19.6444  | 1382  | IPF1384   | Lipid fatty-:isomerase activity                       |                                                               |
| CA5098 | 1.0 | 1.1 | 1.0 | IPF1380   | 15483540..delta3-cis-delta2-trans   | orf19.6443  | 1380  | IPF1382   | UNCLASSI molecular_function unknown                   |                                                               |
| CA5099 | 0.9 | 1.1 | 1.0 | PRP8      | complemer U5 snRNP protein, pre     | orf19.6442  | 1378  | IPF1380   | Lipid fatty-acid and isoprenoid metabolism ""         | ENERGY SUBCELLULAR LOCALISATION                               |
| CA5100 | 1.0 | 1.1 | 1.0 | IPF1372   | 15492089..unknown function          | orf19.6440  | 1372  | CaPRP8    | CELL CYC RNA binding                                  |                                                               |
| CA5101 | 1.1 | 1.1 | 1.0 | LCB1      | 15494654..Serine C-palmitoyltran    | orf19.6438  | 1370  | IPF1372   | UNCLASSI ligase activity                              |                                                               |
| CA5102 | 0.9 | 0.9 | 1.0 | CDC23     | complemer Subunit of anaphase-p     | orf19.6437  | 1368  | CaLCB1    | Lipid fatty-:transferase activity                     |                                                               |

|        |     |     |     |          |                                             |             |       |           |                                                                                                                   |
|--------|-----|-----|-----|----------|---------------------------------------------|-------------|-------|-----------|-------------------------------------------------------------------------------------------------------------------|
| CA5103 | 1.0 | 0.9 | 1.0 | IPF1367  | 15498434..unknown function                  | orf19.6436  | 1367  | CaCDC23   | CELL CYC protein binding                                                                                          |
| CA5104 | 1.0 | 1.1 | 1.1 | IPF1364  | complemer unknown function                  | orf19.6435  | 1364  | IPF1367   | No significant S.c. match                                                                                         |
| CA5105 | 0.9 | 1.1 | 0.9 | PEX19    | 15500780..Required for biogenesis           | orf19.6434  | 1363  | IPF1364   | UNCLASSI molecular_function unknown                                                                               |
| CA5106 | 0.9 | 0.7 | 1.0 | AFG2     | complemer Member of the Sec18p              | orf19.6432  | 1361  | CaPEX19   | SUBCELLI molecular_function unknown                                                                               |
| CA5107 | 1.1 | 1.0 | 1.1 | IPF1358  | 15504327..unknown function                  | orf19.6431  | 1358  | CaAFG2    | UNCLASSI hydrolase activity                                                                                       |
| CA5108 | 1.1 | 1.2 | 1.1 | SK12     | complemer Antiviral protein and p           | orf19.6425  | 1354  | IPF1358   | No significant S.c. match                                                                                         |
| CA5109 | 0.9 | 0.9 | 1.1 | UBC9     | 15508929..E2 ubiquitin-conjugatin           | orf19.6424  | 1348  | CaSK12    | CELL RES RNA binding,helicase activity,translation regulator activity                                             |
| CA5110 | 0.9 | 1.0 | 1.1 | FBP26    | complemer Fructose-2,6-bisphosp             | orf19.6423  | 1347  | CaUBC9    | CELL CYCLE AND DNA PROCESSING ""PROTEIN FATE [folding modification destination] ""SUBCELLULAR LOCALISATION        |
| CA5111 | 1.0 | 1.0 | 1.1 | SSY5     | 15511240..Involved in sulfonylure:          | orf19.6422  | 1345  | CaFBP26   | C-compour hydrolase activity                                                                                      |
| CA5112 | 1.3 | 2.0 | 1.3 | IPF1341  | complemer Similarity to mucin prot          | orf19.6420  | 1341  | CaSSY5    | REGULATION OF/INTERACTION WITH CELLULAR ENVIRONMENT                                                               |
| CA5113 | 1.1 | 1.1 | 1.0 | IPF20026 | complemer unknown function                  | orf19.6418  | 20026 | IPF1341   | No significant S.c. match                                                                                         |
| CA5114 | 1.0 | 1.0 | 1.0 | IPF1334  | complemer Conserved hypothetica             | orf19.6417  | 1334  | IPF20026  | UNCLASSI molecular_function unknown                                                                               |
| CA5115 | 1.1 | 1.1 | 1.1 | IPF1331  | complemer unknown function                  | orf19.6416  | 1331  | IPF1334   | UNCLASSI molecular_function unknown                                                                               |
| CA5116 | 0.7 | 0.4 | 1.1 | TPM2.3   | complemer Tropomyosin, 3-prime end          | orf19.6415  | 1325  | IPF1331   | UNCLASSI molecular_function unknown                                                                               |
| CA5117 | 1.1 | 1.1 | 1.0 | IPF1323  | 15530494..unknown function                  | orf19.6414  | 1323  | CaTPM2.3  | CELL FATI protein binding                                                                                         |
| CA5118 | 1.0 | 1.0 | 1.0 | IPF1321  | complemer unknown function                  | orf19.6413  | 1321  | IPF1323   | No significant S.c. match                                                                                         |
| CA5119 | 0.9 | 1.0 | 1.0 | IPF1320  | complemer unknown function                  | orf19.6411  | 1320  | IPF1321   | No significant S.c. match                                                                                         |
| CA5120 | 1.1 | 1.2 | 1.0 | YDJ1     | complemer Mitochondrial and ER I            | orf19.6408  | 1317  | IPF1320   | UNCLASSI enzyme regulator activity                                                                                |
| CA5121 | 1.0 | 1.0 | 0.9 | IPF1310  | complemer unknown function                  | orf19.6407  | 1310  | CaYDJ1    | CELL CYCLE AND DNA PROCESSING ""PROTEIN FATE [folding modification destination] ""CELLULAR TRANSPORT AND TRANSPOR |
| CA5122 | 1.2 | 1.0 | 1.4 | IPF1308  | 15541942..Similarity to ribosomal           | orf19.6406  | 1308  | IPF1310   | PROTEIN I molecular_function unknown                                                                              |
| CA5123 | 1.0 | 1.0 | 1.0 | IPF1306  | 15543459..unknown function                  | orf19.6405  | 1306  | IPF1308   | PROTEIN I molecular_function unknown                                                                              |
| CA5124 | 0.9 | 1.1 | 1.0 | GSH2     | complemer Glutathione synthetase            | orf19.6404  | 1304  | IPF1306   | UNCLASSI molecular_function unknown                                                                               |
| CA5125 | 1.9 | 1.2 | 1.5 | RPP2     | 15546934..acidic ribosomal protein by homok | orf19.6403  | 5111  | CaGSH2    | Metabolism ligase activity                                                                                        |
| CA5126 | 1.1 | 0.9 | 1.1 | SLS1     | complemer Endoplasmic transloca             | orf19.6403  | 5113  | CaRPP2    | PROTEIN I structural molecule activity                                                                            |
| CA5127 | 1.1 | 1.2 | 1.0 | CYS3     | complemer cystathionine gamma-l             | orf19.6402  | 5115  | CaSLS1    | PROTEIN I molecular_function unknown                                                                              |
| CA5128 | 0.9 | 0.9 | 1.0 | IPF5118  | complemer unknown function                  | orf19.1375i | 5118  | CaCYS3    | Amino acid lyase activity                                                                                         |
| CA5129 | 1.0 | 0.9 | 1.1 | ATS1     | complemer similar to Saccharomy             | orf19.1375i | 5119  | IPF5118   | UNCLASSI molecular_function unknown                                                                               |
| CA5130 | 0.9 | 0.7 | 1.0 | IFH2     | 15553854..Dioxygenase (by homc              | orf19.1375i | 5121  | CaATS1    | SUBCELLI molecular_function unknown                                                                               |
| CA5131 |     |     |     | IPF5124  | 15555334..15559494                          |             |       | CaIFH2    | CELL RESCUE DEFENSE AND VIRULENCE                                                                                 |
| CA5132 | 1.0 | 1.1 | 1.0 | GTS1     | complemer Transcription factor by           | orf19.6393  | 5128  |           |                                                                                                                   |
| CA5133 | 0.9 | 0.9 | 1.0 | IPF5129  | complemer unknown function                  | orf19.6392  | 5129  | CaGTS1    | CELL CYC molecular_function unknown                                                                               |
| CA5134 | 0.9 | 0.9 | 1.0 | IPF5131  | complemer unknown function                  | orf19.6391  | 5131  | IPF5129   | No significant S.c. match                                                                                         |
| CA5135 | 0.9 | 1.6 | 0.7 | HSP104   | 15564334..Heat shock protein (by            | orf19.1374i | 5137  | IPF5131   | No significant S.c. match                                                                                         |
| CA5136 | 0.9 | 0.8 | 1.0 | IPF5139  | 15568890..unknown function                  | orf19.1374i | 5139  | CaHSP104  | PROTEIN I chaperone activity                                                                                      |
| CA5137 | 1.0 | 0.9 | 0.9 | IPF1032  | 15572535..similar to probable mer           | orf19.4574  | 1032  | IPF5139   | No significant S.c. match                                                                                         |
| CA5138 | 1.1 | 1.0 | 0.9 | IPF1031  | 15574679..Similar to aminoglycos            | orf19.4575  | 1031  | IPF1032   | UNCLASSI molecular_function unknown                                                                               |
| CA5139 | 1.0 | 1.0 | 0.9 | IPF1027  | 15577328..unknown function                  | orf19.4577  | 1027  | IPF1031   | CLASSIFIC molecular_function unknown                                                                              |
| CA5140 | 1.0 | 1.0 | 1.1 | TIM10    | 15580869..Subunit of the Tim22-complex (by  | orf19.4578  | 1024  | IPF1027   | UNCLASSI signal transducer activity                                                                               |
| CA5141 | 0.9 | 1.0 | 0.9 | CYT2     | complemer holocytochrome-c1 syr             | orf19.4578  | 1023  | CaTIM10   | No significant S.c. match                                                                                         |
| CA5142 | 0.9 | 1.0 | 1.0 | IPF1022  | complemer similar to Saccharomy             | orf19.4579  | 1022  | CaCYT2    | Metabolism lyase activity                                                                                         |
| CA5143 | 0.9 | 1.0 | 1.0 | IPF1020  | complemer Weak similarity to N. ci          | orf19.4580  | 1020  | IPF1022   | UNCLASSI molecular_function unknown                                                                               |
| CA5144 | 1.1 | 0.9 | 0.9 | IPF1019  | 15585165..unknown function                  | orf19.4581  | 1019  | IPF1020   | UNCLASSIFIED PROTEINS                                                                                             |
| CA5145 | 0.9 | 0.9 | 1.0 | SKI6     | 15586468..3 ->5 exoribonuclease             | orf19.4582  | 1018  | IPF1019   | UNCLASSI transferase activity                                                                                     |
| CA5146 | 1.0 | 1.0 | 0.9 | YMC2     | complemer Carnitine/acylcarnitine           | orf19.4583  | 1017  | CaSKI6    | No significant S.c. match                                                                                         |
| CA5147 | 1.1 | 1.0 | 1.0 | PHO12    | complemer Acid phosphatase, sec             | orf19.4584  | 1016  | CaYMC2    | CELLULAR TRANSPORT AND TRANSPORT MECHANISMS SUBCELLULAR LOCALISATION                                              |
| CA5148 | 0.9 | 0.9 | 1.0 | TFG1     | 15590768..RNA pol.II transcrip              | orf19.4585  | 1015  | CaPHO12   | Phosphate metabolism SUBCELLULAR LOCALISATION                                                                     |
| CA5149 | 1.0 | 1.0 | 1.0 | HGH1     | complemer Similar to human HMG              | orf19.4587  | 1013  | CaTFG1    | TRANSCR transcription regulator activity                                                                          |
| CA5150 | 1.0 | 1.1 | 1.0 | FMS1     | complemer Similar to corticosteroid         | orf19.4589  | 1011  | CaHGH1    | UNCLASSI molecular_function unknown                                                                               |
| CA5151 | 1.0 | 1.0 | 1.1 | IPF1009  | complemer Weak similarity to S. c           | orf19.4590  | 1009  | CaFMS1    | Metabolism oxidoreductase activity                                                                                |
| CA5152 | 1.0 | 1.0 | 1.0 | CAT2     | complemer carnitine O-acetyltrans           | orf19.4591  | 1006  | IPF1009   | TRANSCRIPTION SUBCELLULAR LOCALISATION                                                                            |
| CA5153 | 0.9 | 0.9 | 1.0 | IPF1003  | 15607847..unknown function                  | orf19.4592  | 1003  | CaCAT2    | Lipid fatty-z transferase activity                                                                                |
| CA5154 | 1.1 | 1.1 | 1.0 | RGA2     | 15612572..rho-GTPase activating             | orf19.4593  | 1000  | IPF1003   | No significant S.c. match                                                                                         |
| CA5155 | 1.0 | 1.0 | 1.0 | IPF995   | complemer unknown function                  | orf19.4594  | 995   | CaRGA2    | CELL FATI signal transducer activity                                                                              |
| CA5156 | 1.1 | 1.0 | 1.0 | CLC1     | 15616949..clathrin light chain (by          | orf19.4594  | 994   | IPF995    | UNCLASSI molecular_function unknown                                                                               |
| CA5157 | 0.9 | 1.0 | 0.9 | IPF993   | complemer unknown function                  | orf19.4595  | 993   | CaCLC1    | CELLULAF structural molecule activity                                                                             |
| CA5158 | 1.0 | 1.0 | 1.0 | IPF992   | 15619879..unknown function                  | orf19.4596  | 992   | IPF993    | No significant S.c. match                                                                                         |
| CA5159 | 1.0 | 1.1 | 1.0 | CAP2     | complemer F-actin capping protein           | orf19.4597  | 990   | IPF992    | No significant S.c. match                                                                                         |
| CA5160 | 0.8 | 0.8 | 0.7 | PHO89    | complemer Na+-coupled phosphat              | orf19.4599  | 988   | CaCAP2    | CELL FATI protein binding                                                                                         |
| CA5161 | 1.0 | 0.9 | 1.0 | IPF983   | 15628986..unknown function                  | orf19.4600  | 983   | CaPHO89   | Phosphate transporter activity                                                                                    |
| CA5162 | 0.9 | 1.1 | 1.0 | IPF982   | complemer Weakly similar to human dolichol- | orf19.4601  | 982   | IPF983    | UNCLASSI molecular_function unknown                                                                               |
| CA5163 | 1.0 | 1.0 | 0.9 | TFC1     | complemer Transcription initiation          | orf19.4601  | 6022  | IPF982    | No significant S.c. match                                                                                         |
| CA5164 | 1.1 | 1.2 | 0.9 | MDH1     | 15632903..Mitochondrial malate d            | orf19.4602  | 6025  | CaTFC1    | TRANSCR transcription regulator activity                                                                          |
| CA5165 | 0.9 | 1.1 | 1.0 | ARL1     | 15634415..GTP-binding protein in            | orf19.4603  | 6027  | CaMDH1    | C-compour oxidoreductase activity                                                                                 |
| CA5166 | 0.8 | 0.9 | 0.9 | TYR1     | complemer Prephenate dehydroge              | orf19.4605  | 6029  | CaARL1    | PROTEIN I hydrolase activity                                                                                      |
| CA5167 | 1.0 | 1.0 | 1.1 | ERG8     | 15636640..Phosphomevalonate ki              | orf19.4606  | 6030  | CaTYR1    | Amino acid oxidoreductase activity                                                                                |
| CA5168 | 0.9 | 1.1 | 1.0 | IPF6032  | 15638410..unknown function                  | orf19.4607  | 6032  | CaERG8    | Lipid fatty-z transferase activity                                                                                |
| CA5170 | 1.0 | 0.9 | 1.0 | PDC12.EX | 15640027..Pyruvate decarboxylas             | orf19.4608  | 6036  | IPF6032   | UNCLASSIFIED PROTEINS                                                                                             |
| CA5171 | 0.9 | 0.8 | 1.0 | IPF6037  | 15642439..Similar to Legionella pr          | orf19.4609  | 6037  | CaPDC12   | C-compound and carbohydrate metabolism ENERGY SUBCELLULAR LOCALISATION                                            |
| CA5172 | 1.0 | 1.1 | 1.0 | CPS2.5F  | 15643464..Carboxypeptidase YSC              | orf19.4610  | 6038  | IPF6037   | UNCLASSI molecular_function unknown                                                                               |
| CA5173 | 1.0 | 1.1 | 1.1 | CPS2.3F  | 15644533..Carboxypeptidase YSCS             | orf19.4611  | 18130 | CaCPS2.5F | PROTEIN FATE [folding modification destination] ""SUBCELLULAR LOCALISATION                                        |
| CA5174 | 0.9 | 1.0 | 1.0 | PRS4     | 15645480..Ribose-phosphate pyr              | orf19.4611  | 6040  | CaCPS2.3F | PROTEIN FATE [folding modification destination] ""SUBCELLULAR LOCALISATION                                        |
| CA5175 | 0.9 | 1.1 | 0.9 | IPF6041  | complemer Similar to Legionella pr          | orf19.4612  | 6041  | CaPRS4    | Nucleotide transferase activity                                                                                   |

|        |     |     |     |            |                                                 |            |                  |                                                                                                                  |
|--------|-----|-----|-----|------------|-------------------------------------------------|------------|------------------|------------------------------------------------------------------------------------------------------------------|
| CA5176 | 1.0 | 1.0 | 1.0 | IPF6045    | complemer unknown function                      | orf19.4614 | 6045 IPF6041     | UNCLASSIFIED PROTEINS                                                                                            |
| CA5177 | 0.8 | 0.9 | 0.8 | IPF11101   | 15653368..Weak similarity to C. ciorf19.4615    |            | 11101 IPF6045    | UNCLASSIMolecular_function unknown                                                                               |
| CA5178 | 1.2 | 1.3 | 1.4 | POL30      | complemer Proliferating Cell Nucleorf19.4616    |            | 20027 IPF11101   | UNCLASSIMolecular_function unknown                                                                               |
| CA5179 | 1.0 | 1.0 | 0.9 | MAK3       | complemer N-acetyltransferase (b)orf19.4617     |            | 11098 CaPOL30    | CELL CYC nucleotidyltransferase activity                                                                         |
| CA5180 | 1.3 | 3.5 | 1.1 | FBA1       | 15657313..fructose-bisphosphate orf19.4618      |            | 11096 CaMAK3     | PROTEIN ltransferase activity                                                                                    |
| CA5181 | 1.1 | 1.0 | 1.1 | TIM12      | complemer subunit of the TIM22-c orf19.4620     |            | 11094 CaFBA1     | C-compour lyase activity                                                                                         |
| CA5182 | 1.0 | 0.9 | 1.0 | IPF11093   | 15659318..weak similarity to pig t orf19.4621   |            | 11093 CaTIM12    | PROTEIN ltransporter activity                                                                                    |
| CA5183 | 0.9 | 1.0 | 1.0 | IPF11090.f | 15662288..weak similarity to glute orf19.4622   |            | 11090 IPF11093   | UNCLASSIMolecular_function unknown                                                                               |
| CA5184 | 0.9 | 1.2 | 1.0 | IPF11090.f | 15663575..weak similarity to glutenin, exon 2   |            | 11086 IPF11090.ε | UNCLASSIMolecular_function unknown                                                                               |
| CA5185 | 2.9 | 1.0 | 3.4 | NHP6A      | 15666811..nonhistone chromosomal protein r      |            | 10163 IPF11090.ε | No significant S.c. match                                                                                        |
| CA5186 | 0.9 | 0.9 | 0.9 | HRT2       | 15668014..Similar to SchRT2 (by orf19.4624      |            | 10162 CaNHP6A    | CELL FATlDNA binding                                                                                             |
| CA5187 | 0.9 | 0.9 | 1.0 | TOA2       | complemer TFIIA subunit 13.5 kD orf19.4625      |            | 10160 CaHRT2     | CLASSIFICmolecular_function unknown                                                                              |
| CA5188 | 0.9 | 1.0 | 0.9 | TAP42      | 15670275..Component of the Tor orf19.4626       |            | 10159 CaTOA2     | TRANSCR transcription regulator activity                                                                         |
| CA5189 | 0.8 | 0.9 | 0.9 | IPF10158   | complemer Weak similarity to ScN orf19.4627     |            | 10158 CaTAP42    | CELL CYC protein binding                                                                                         |
| CA5190 | 1.0 | 1.0 | 1.0 | IPF10155   | 15675194..unknown function orf19.4628           |            | 10155 IPF10158   | TRANSCR structural molecule activity                                                                             |
| CA5191 | 1.1 | 1.2 | 1.1 | IPF19538   | complemer partially similar to Isocitrate dehyd |            | 19538 IPF10155   | UNCLASSIMolecular_function unknown                                                                               |
| CA5192 | 0.9 | 0.9 | 0.9 | HOK        | 15690495..unknown function orf19.7004           |            | 17447 IPF19538   | C-compound and carbohydrate metabolism ENERGY TRANSCRIPTION SUBCELLULAR LOCALISATION                             |
| CA5194 | 0.8 | 1.0 | 0.8 | IPF11756   | 15695156..unknown function orf19.7006           |            | 11756 CaHOK      | No significant S.c. match                                                                                        |
| CA5195 | 1.0 | 0.9 | 1.0 | GRP8       | complemer Similarity to dihydroflav orf19.7009  |            | 2336 IPF11756    | No significant S.c. match                                                                                        |
| CA5196 | 1.1 | 1.0 | 1.0 | IPF2338    | 15706958..unknown function orf19.7010           |            | 2338 CaGRP8      | Metabolism of vitamins cofactors and prosthetic groups                                                           |
| CA5197 | 1.0 | 1.0 | 1.0 | IPF2342    | 15708991..unknown function orf19.7011           |            | 2342 IPF2338     | UNCLASSIMolecular_function unknown                                                                               |
| CA5198 | 1.0 | 0.8 | 1.0 | LP44       | 15712803..Similar to ribosomal pr orf19.7012    |            | 2343 IPF2342     | UNCLASSIMolecular_function unknown                                                                               |
| CA5199 | 1.0 | 1.0 | 1.0 | IPF2334    | complemer unknown function orf19.7013           |            | 2344 CaLP44      | PROTEIN lstructural molecule activity                                                                            |
| CA5200 | 1.6 | 1.4 | 1.2 | RPL10E     | complemer Ribosomal protein L10 orf19.7015      |            | 2347 IPF2334     | CELL CYCLE AND DNA PROCESSING SUBCELLULAR LOCALISATION                                                           |
| CA5201 | 0.5 | 0.7 | 0.4 | IPF2349    | complemer similar to human sphin orf19.7016     |            | 2349 CaRPL10E    | PROTEIN lstructural molecule activity                                                                            |
| CA5202 | 1.2 | 0.9 | 1.3 | YOX1       | 15721529..Similar to homoeodom orf19.7017       |            | 2351 IPF2349     | Lipid fatty-ε hydrolase activity                                                                                 |
| CA5203 | 1.4 | 2.1 | 1.2 | RPS18      | complemer Ribosomal protein S18 orf19.7018      |            | 2353 CaYOX1      | TRANSCR DNA binding                                                                                              |
| CA5204 | 1.0 | 1.0 | 1.0 | YML6       | complemer Ribosomal protein, mit orf19.7019     |            | 2354 CaRPS18     | PROTEIN lstructural molecule activity                                                                            |
| CA5205 | 1.1 | 1.1 | 1.0 | KEX1       | complemer Carboxypeptidase-αlpt orf19.7020      |            | 2356 CaYML6      | PROTEIN lstructural molecule activity                                                                            |
| CA5206 | 3.7 | 2.8 | 2.8 | GPH1       | complemer Glycogen phosphoryla orf19.7021       |            | 2357 CaKEX1      | PROTEIN lpeptidase activity                                                                                      |
| CA5207 | 1.0 | 0.9 | 1.0 | IPF2359    | 15735088..unknown function orf19.7022           |            | 2359 CaGPH1      | C-compour transferase activity                                                                                   |
| CA5208 | 0.9 | 0.9 | 1.0 | IPF2361    | 15736314..unknown function orf19.7023           |            | 2361 IPF2359     | No significant S.c. match                                                                                        |
| CA5209 | 1.1 | 0.9 | 0.9 | MCM1       | 15738758..Transcription factor of orf19.7025    |            | 2363 IPF2361     | UNCLASSIMolecular_function unknown                                                                               |
| CA5210 | 0.9 | 1.0 | 1.0 | IPF2373    | 15748251..unknown function orf19.7027           |            | 2373 CaMCM1      | Amino acid DNA binding                                                                                           |
| CA5211 | 0.7 | 0.6 | 0.7 | IPF18125   | 15750117..similar to glutenin and orf19.7028    |            | 18125 IPF2373    | No significant S.c. match                                                                                        |
| CA5212 | 1.0 | 1.0 | 0.9 | IPF3050    | complemer unknown function orf19.7029           |            | 3050 IPF18125    | No significant S.c. match                                                                                        |
| CA5213 | 1.0 | 1.3 | 1.1 | SSR1       | complemer Secretary Stress Resp orf19.7030      |            | 3054 IPF3050     | CLASSIFIC hydrolase activity                                                                                     |
| CA5214 | 1.2 | 1.0 | 1.0 | IPF19807   | complemer unknown function orf19.7032           |            | 19807 CaSSR1     | No signific structural molecule activity                                                                         |
| CA5215 | 1.1 | 0.9 | 1.0 | PPS1       | 15764307..protein tyrosine phospl orf19.7033    |            | 3063 IPF19807    | Amino acid metabolism SUBCELLULAR LOCALISATION                                                                   |
| CA5216 | 0.9 | 0.9 | 1.0 | IPF3069    | 15767764..unknown function orf19.7034           |            | 3069 CaPPS1      | CELL CYC protein phosphatase activity                                                                            |
| CA5217 | 1.0 | 0.9 | 0.9 | RFC2       | complemer Replication factor (by l orf19.7035   |            | 3070 IPF3069     | No significant S.c. match                                                                                        |
| CA5218 | 0.9 | 1.0 | 1.0 | WHI2       | complemer Growth regulation fact orf19.7036     |            | 3073 CaRFC2      | CELL CYC DNA binding                                                                                             |
| CA5219 | 0.9 | 0.9 | 0.9 | YAE1       | 15773683..Essential protein orf19.7037          |            | 3074 CaWHI2      | CELL FATlenzyme regulator activity                                                                               |
| CA5220 | 1.0 | 1.1 | 1.1 | MVP1.EXC   | complemer Required for vacuolar p orf19.7038    |            | 3075 CaYAE1      | UNCLASSIMolecular_function unknown                                                                               |
| CA5221 | 1.0 | 1.0 | 1.0 | MVP1.EXC   | complemer Required for vacuolar p orf19.7039    |            | 3076 CaMVP1.e    | PROTEIN l molecular_function unknown                                                                             |
| CA5222 | 0.9 | 0.9 | 0.9 | IPF3079    | complemer similar to Saccharomyx orf19.7041     |            | 3079 CaMVP1.e    | PROTEIN FATE [folding modification destination] ""CELLULAR TRANSPORT AND TRANSPORT MECHANISMS SUBCELLULAR LOCAL  |
| CA5223 | 0.8 | 0.9 | 0.9 | IPF3080    | complemer unknown function (by l orf19.7042     |            | 3080 IPF3079     | TRANSCR RNA binding                                                                                              |
| CA5224 | 1.0 | 1.0 | 1.0 | IPF3081    | 15783003..unknown function orf19.7043           |            | 3081 IPF3080     | No significant S.c. match                                                                                        |
| CA5225 | 1.0 | 1.2 | 1.0 | ACB1.EXO   | complemer acyl-coenzyme-A-binding protein,      |            | 3082 IPF3081     | UNCLASSIMolecular_function unknown                                                                               |
| CA5226 | 1.0 | 0.9 | 1.0 | RIM15      | complemer Protein kinase involvec orf19.7044    |            | 3086 CaACB1.e    | Lipid fatty-ε transporter activity                                                                               |
| CA5227 | 0.9 | 1.1 | 1.0 | IPF3087    | complemer unknown function orf19.7046           |            | 3087 CaRIM15     | TRANSCR protein kinase activity                                                                                  |
| CA5228 | 0.9 | 0.9 | 0.8 | RTF1.3EO   | complemer Regulates DNA binding orf19.7047      |            | 3088 IPF3087     | Amino acid DNA binding                                                                                           |
| CA5229 | 0.9 | 0.7 | 1.0 | IPF10425   | 15795157..unknown function orf19.5035           |            | 10425 CaRTF1.3ε  | TRANSCR transcription regulator activity                                                                         |
| CA5230 | 1.0 | 1.0 | 0.9 | IPF10424   | complemer unknown function orf19.5034           |            | 10424 IPF10425   | CELL CYC transcription regulator activity                                                                        |
| CA5231 | 0.9 | 0.7 | 0.9 | IPF10422   | 15799197..Similar to APG12, com orf19.5033      |            | 10422 IPF10424   | UNCLASSIMolecular_function unknown                                                                               |
| CA5232 | 1.0 | 1.0 | 1.0 | SUN42      | complemer Putative cell wall beta- orf19.5032   |            | 10421 IPF10422   | PROTEIN l molecular_function unknown                                                                             |
| CA5233 | 1.1 | 1.1 | 1.0 | SSK1       | complemer Putative reponse regul orf19.5031     |            | 3012 CaSUN42     | CELL CYCLE AND DNA PROCESSING CELL FATE                                                                          |
| CA5234 | 1.0 | 0.9 | 0.9 | IPF3014    | complemer weak similarity to S. ce orf19.5030   |            | 3014 CaSSK1      | C-compour signal transducer activity,transcription regulator activity,enzyme regulator activity                  |
| CA5235 | 0.8 | 0.9 | 0.9 | IPF3015    | 15809952..Similar to E.coli modF orf19.5029     |            | 3015 IPF3014     | UNCLASSIMolecular_function unknown                                                                               |
| CA5236 | 1.0 | 0.9 | 1.0 | LCB2       | 15812272..Palmitoyl transferase ( orf19.5027    |            | 3017 IPF3015     | CELL CYC transporter activity,hydrolase activity                                                                 |
| CA5237 | 1.0 | 1.0 | 1.0 | ZMS1       | 15818471..Zinc Finger Protein C2 orf19.5026     |            | 3021 CaLCB2      | Lipid fatty-ε transferase activity                                                                               |
| CA5238 | 1.0 | 1.0 | 1.0 | MET3       | complemer ATP sulfurylase orf19.5025            |            | 3022 CaZMS1      | TRANSCR molecular_function unknown                                                                               |
| CA5239 | 1.8 | 1.8 | 1.3 | GND1       | 15827975..6-phosphogluconate di orf19.5024      |            | 3028 CaMET3      | Amino acid nucleotidyltransferase activity                                                                       |
| CA5240 | 0.9 | 0.9 | 0.9 | IPF3032    | 15830354..allantoate permease (l orf19.5023     |            | 3032 CaGND1      | C-compour oxidoreductase activity                                                                                |
| CA5241 | 1.0 | 1.0 | 1.0 | SMF3       | complemer Probable manganese t orf19.5022       |            | 3034 IPF3032     | TRANSPORT FACILITATION                                                                                           |
| CA5242 | 0.9 | 1.1 | 1.0 | PDX1       | 15835165..Pyruvate dehydrogena orf19.5021       |            | 3038 CaSMF3      | PROTEIN FATE [folding modification destination] ""CELLULAR TRANSPORT AND TRANSPORT MECHANISMS REGULATION OF/INTE |
| CA5243 | 1.0 | 0.9 | 1.0 | IPF3040    | 15836861..unknown function orf19.5020           |            | 3040 CaPDX1      | C-compour protein binding                                                                                        |
| CA5244 | 1.0 | 1.0 | 1.2 | IPF3043    | complemer unknown function orf19.5019           |            | 3043 IPF3040     | No significant S.c. match                                                                                        |
| CA5245 | 0.9 | 0.9 | 0.9 | DUR32      | 15841924..Urea transport protein orf19.5017     |            | 3048 IPF3043     | No significant S.c. match                                                                                        |
| CA5246 | 0.9 | 1.0 | 1.0 | IPF19808   | 15844117..unknown function orf19.5016           |            | 19808 CaDUR32    | REGULATION OF/INTERACTION WITH CELLULAR ENVIRONMENT SUBCELLULAR LOCALISATION TRANSPORT FACILITATION              |
| CA5247 | 1.1 | 1.0 | 1.1 | MYO2       | complemer Myosin heavy chain (b orf19.5015      |            | 13531 IPF19808   | No significant S.c. match                                                                                        |
| CA5248 | 1.0 | 1.1 | 1.0 | IPF1828    | 15851987..unknown function orf19.5014           |            | 1828 CaMYO2      | CELLULAF motor activity                                                                                          |

|        |     |     |     |            |                                               |            |       |            |                                                 |                                                  |                                                                 |                         |
|--------|-----|-----|-----|------------|-----------------------------------------------|------------|-------|------------|-------------------------------------------------|--------------------------------------------------|-----------------------------------------------------------------|-------------------------|
| CA5249 | 1.0 | 1.0 | 1.0 | PCM1       | complemer phosphoacetylglucosai               | orf19.5013 | 1827  | IPF1828    | UNCLASSI                                        | molecular_function                               | unknown                                                         |                         |
| CA5250 | 0.9 | 0.9 | 0.9 | IPF1826    | 15854644..unknown function                    | orf19.5012 | 1826  | CaPCM1     | C-compour                                       | isomerase                                        | activity                                                        |                         |
| CA5251 | 1.0 | 1.1 | 1.0 | IPF1824    | complemer unknown function                    | orf19.5011 | 1824  | IPF1826    | No significant                                  | S.c. match                                       |                                                                 |                         |
| CA5252 | 1.0 | 1.0 | 1.0 | DIM1       | 15858440..rRNA (adenine-N6,N6-                | orf19.5010 | 1822  | IPF1824    | CELL CYC                                        | molecular_function                               | unknown                                                         |                         |
| CA5253 | 1.0 | 1.1 | 1.1 | KEL3       | complemer Kelch-repeat protein                | orf19.5009 | 1821  | CaDIM1     | TRANSCR                                         | transferase                                      | activity                                                        |                         |
| CA5254 | 1.0 | 1.0 | 1.0 | IPF1820    | 15861698..unknown function                    |            | 1820  | CaKEL3     | UNCLASSI                                        | molecular_function                               | unknown                                                         |                         |
| CA5255 | 0.7 | 0.7 | 1.7 | ACT1       | complemer actin (by homology)                 | orf19.5007 | 1819  | IPF1820    | UNCLASSI                                        | structural_molecule                              | activity                                                        |                         |
| CA5257 | 1.1 | 0.9 | 1.1 | SNC2.EXC   | 15865513..Strong similarity to synaptobrevin, |            | 1811  | CaACT1     | CELL CYC                                        | structural_molecule                              | activity                                                        |                         |
| CA5258 | 1.2 | 1.1 | 1.1 | GCV3       | 15866499..Glycine decarboxylase               | orf19.5006 | 1809  | CaSNC2.e   | PROTEIN I                                       | transporter                                      | activity                                                        |                         |
| CA5259 | 1.0 | 1.2 | 1.1 | OSM2       | complemer Osmotic growth proteir              | orf19.5005 | 1808  | CaGCV3     | Amino acid                                      | oxidoreductase                                   | activity                                                        |                         |
| CA5260 | 1.0 | 1.0 | 1.1 | RAD54      | complemer DNA-dependent ATPa                  | orf19.5004 | 1807  | CaOSM2     | ENERGY ""                                       | CELL RESCUE DEFENSE AND VIRULENCE ""             | SUBCELLULAR LOCALISATION                                        |                         |
| CA5261 | 1.0 | 1.0 | 1.1 | IPF1805    | 15872431..unknown function                    | orf19.5003 | 1805  | CaRAD54    | CELL CYC                                        | DNA binding                                      |                                                                 |                         |
| CA5262 | 0.9 | 1.0 | 0.9 | IPF1804    | complemer putative transcription f            | orf19.5001 | 1804  | IPF1805    | UNCLASSI                                        | enzyme_regulator                                 | activity,protein binding                                        |                         |
| CA5263 | 0.9 | 0.9 | 0.9 | CYB3       | complemer Lactate dehydrogenasi               | orf19.5000 | 1801  | IPF1804    | TRANSCR                                         | transcription_regulator                          | activity                                                        |                         |
| CA5264 | 0.9 | 2.0 | 0.7 | IPF1798    | complemer unknown function                    | orf19.4998 | 1798  | CaCYB3     | C-compour                                       | oxidoreductase                                   | activity                                                        |                         |
| CA5265 | 1.0 | 1.1 | 1.0 | IPF1792    | 15885491..unknown function                    | orf19.4997 | 1792  | IPF1798    | Amino acid                                      | metabolism                                       | TRANSCRIPTION SUBCELLULAR LOCALISATION                          |                         |
| CA5266 | 0.9 | 1.0 | 0.9 | IPF1787.3f | complemer unknown function, 3-pr              | orf19.4996 | 1789  | IPF1792    | C-compound                                      | and carbohydrate metabolism                      | TRANSCRIPTION                                                   |                         |
| CA5267 | 1.0 | 0.9 | 1.0 | IPF1787.5f | complemer unknown function, 5-pr              | orf19.4995 | 1787  | IPF1787.3f | UNCLASSI                                        | molecular_function                               | unknown                                                         |                         |
| CA5268 | 0.9 | 1.0 | 1.1 | SEC18.3F   | complemer vesicular fusion proteir            | orf19.4994 | 1786  | IPF1787.5f | No significant                                  | S.c. match                                       |                                                                 |                         |
| CA5270 | 1.0 | 0.9 | 1.0 | SEC18.5F   | complemer vesicular fusion proteir            | orf19.4993 | 1784  | CaSEC18.   | CELLULAF                                        | hydrolase                                        | activity                                                        |                         |
| CA5271 | 1.0 | 1.1 | 1.0 | IPF1777    | complemer similar to Saccharomy               | orf19.4991 | 1777  | CaSEC18.   | CELLULAR                                        | TRANSPORT AND TRANSPORT MECHANISMS               | SUBCELLULAR LOCALISATION                                        |                         |
| CA5272 | 1.0 | 1.0 | 1.0 | IPF1770    | complemer unknown function                    | orf19.4988 | 1770  | IPF1777    | CELL CYC                                        | RNA binding                                      |                                                                 |                         |
| CA5273 | 0.9 | 1.1 | 1.0 | NUP49      | 15905616..nuclear pore protein (b             | orf19.4987 | 1766  | IPF1770    | No significant                                  | S.c. match                                       |                                                                 |                         |
| CA5274 | 0.9 | 0.9 | 1.0 | IPF1764    | complemer similar to Saccharomy               | orf19.4985 | 1764  | CaNUP49    | TRANSCR                                         | structural_molecule                              | activity                                                        |                         |
| CA5275 | 1.0 | 1.1 | 1.0 | IPF1760.3f | complemer unknown function, 3-pr              | orf19.1245 | 1760  | IPF1764    | TRANSCO                                         | transporter                                      | activity                                                        |                         |
| CA5276 | 1.1 | 1.0 | 1.1 | IPF1759.5f | complemer unknown function, similar to endoc  |            | 1759  | IPF1760.3f | C-compound                                      | and carbohydrate metabolism                      |                                                                 |                         |
| CA5277 | 1.1 | 1.1 | 1.0 | CTA29.EX1  | 15918562..Protein with putative tr            | orf19.7127 | 1892  | IPF1759.5f | No significant                                  | S.c. match                                       |                                                                 |                         |
| CA5278 | 0.5 | 0.8 | 0.3 | CTA29.EX1  | 15919539..Protein with putative transcription |            | 1893  | CaCTA29.   | No significant                                  | S.c. match                                       |                                                                 |                         |
| CA5279 | 1.0 | 0.8 | 1.1 | SYS1       | 15920247..Similar to ypt6 suppres             | orf19.7128 | 1895  | CaCTA29.   | No significant                                  | S.c. match                                       |                                                                 |                         |
| CA5280 | 1.0 | 0.9 | 0.9 | IPF1899    | 15921443..unknown function                    | orf19.7131 | 1899  | CaSYS1     | CELLULAF                                        | molecular_function                               | unknown                                                         |                         |
| CA5281 | 0.9 | 0.9 | 0.9 | SPT6       | complemer Transcription elongatio             | orf19.7136 | 1910  | IPF1899    | UNCLASSI                                        | molecular_function                               | unknown                                                         |                         |
| CA5282 | 1.0 | 1.1 | 1.0 | IPF1911    | complemer unknown function                    | orf19.7139 | 1911  | CaSPT6     | CELL CYC                                        | transcription_regulator                          | activity                                                        |                         |
| CA5283 | 1.0 | 0.9 | 1.4 | IPF1912    | 15927356..putative catechol o-me              | orf19.7140 | 1912  | IPF1911    | No significant                                  | S.c. match                                       |                                                                 |                         |
| CA5284 | 1.1 | 1.1 | 1.0 | UFE1       | 15928155..Endoplasmic reticulum               | orf19.7141 | 1914  | IPF1912    | No significant                                  | S.c. match                                       |                                                                 |                         |
| CA5285 | 1.0 | 1.2 | 0.9 | HBS1.3F    | complemer Translation elongation              | orf19.7144 | 1918  | CaUFE1     | CELLULAF                                        | transporter                                      | activity                                                        |                         |
| CA5287 | 0.9 | 1.0 | 1.0 | IPF1922    | complemer similar to multidrug res            | orf19.7148 | 1922  | CaHBS1.3f  | PROTEIN I                                       | molecular_function                               | unknown                                                         |                         |
| CA5288 | 0.9 | 1.0 | 0.9 | IPF1928    | 15935369..unknown function                    | orf19.7149 | 1928  | IPF1922    | CELL RESCUE                                     | DEFENSE AND VIRULENCE ""                         | TRANSPORT FACILITATION                                          |                         |
| CA5289 | 0.9 | 1.3 | 1.0 | NRG1       | complemer similar to transcription            | orf19.7150 | 1932  | IPF1928    | UNCLASSI                                        | molecular_function                               | unknown                                                         |                         |
| CA5290 | 1.3 | 1.9 | 1.4 | IPF1943    | 15953097..similar to Aspergillus (t           | orf19.7152 | 1943  | CaNRG1     | UNCLASSI                                        | transcription_regulator                          | activity                                                        |                         |
| CA5291 | 1.0 | 0.9 | 1.1 | LOS1       | 15954470..pre-tRNA splicing prote             | orf19.7153 | 1945  | IPF1943    | Amino acid                                      | metabolism                                       |                                                                 |                         |
| CA5292 | 1.0 | 1.1 | 0.9 | IPF1948    | 15957726..unknown function                    | orf19.7154 | 1948  | CaLOS1     | TRANSCR                                         | RNA binding,protein binding                      |                                                                 |                         |
| CA5293 | 1.0 | 1.0 | 1.0 | FAA24      | complemer Long-chain-fatty-acid--             | orf19.7156 | 1949  | IPF1948    | UNCLASSI                                        | molecular_function                               | unknown                                                         |                         |
| CA5294 | 0.9 | 1.0 | 1.0 | IPF1952    | complemer unknown function                    | orf19.7157 | 1952  | CaFAA24    | Lipid fatty-acid                                | and isoprenoid metabolism                        | ""CELLULAR TRANSPORT AND TRANSPORT MECHANISMS                   | SUBCELLULAR LOCALISATIC |
| CA5295 | 0.9 | 0.9 | 1.0 | IPF1954    | complemer putative transporter (b)            | orf19.7158 | 1954  | IPF1952    | No significant                                  | S.c. match                                       |                                                                 |                         |
| CA5296 | 1.0 | 0.9 | 0.9 | IPF1956    | complemer unknown function                    | orf19.7159 | 1956  | IPF1954    | TRANSPORT                                       | FACILITATION                                     |                                                                 |                         |
| CA5297 | 1.0 | 1.0 | 0.9 | YAR1       | 15967930..Ankyrin repeat-contain              | orf19.7160 | 1957  | IPF1956    | UNCLASSI                                        | molecular_function                               | unknown                                                         |                         |
| CA5298 | 0.8 | 0.9 | 0.9 | SUI3       | 15968805..Translation initiation fa           | orf19.7161 | 19809 | CaYAR1     | CELL CYC                                        | molecular_function                               | unknown                                                         |                         |
| CA5299 | 1.0 | 1.0 | 1.0 | IPF2190    | complemer putative serine/threonii            | orf19.7164 | 2190  | CaSUI3     | PROTEIN I                                       | translation_regulator                            | activity                                                        |                         |
| CA5300 | 1.0 | 1.0 | 1.0 | IPF2189    | 15971542..unknown function                    | orf19.7165 | 2189  | IPF2190    | CLASSIFIC                                       | protein_kinase                                   | activity                                                        |                         |
| CA5301 | 1.1 | 1.0 | 1.0 | IPF2186    | 15973161..unknown function                    | orf19.7166 | 2186  | IPF2189    | No significant                                  | S.c. match                                       |                                                                 |                         |
| CA5302 | 1.1 | 0.9 | 1.0 | IPF20175   | 15975761..unknown function                    | orf19.7167 | 20175 | IPF2186    | UNCLASSIFIED                                    | PROTEINS                                         |                                                                 |                         |
| CA5303 | 1.0 | 0.9 | 1.0 | IPF2180    | 15977893..unknown function                    | orf19.7170 | 2180  | IPF20175   | No significant                                  | S.c. match                                       |                                                                 |                         |
| CA5304 | 1.1 | 1.1 | 1.2 | IPF2178    | complemer unknown function                    | orf19.7173 | 2178  | IPF2180    | No significant                                  | S.c. match                                       |                                                                 |                         |
| CA5305 | 1.0 | 1.0 | 1.0 | IPF2175    | complemer similar to Saccharomy               | orf19.7175 | 2175  | IPF2178    | No significant                                  | S.c. match                                       |                                                                 |                         |
| CA5306 | 0.9 | 1.0 | 1.0 | NPT1       | 15981895..Nicotinate phosphoric               | orf19.7176 | 2173  | IPF2175    | PROTEIN I                                       | molecular_function                               | unknown                                                         |                         |
| CA5307 | 0.9 | 1.0 | 0.9 | IPF2172    | 15983406..similar to Saccharomy               | orf19.7177 | 2172  | CaNPT1     | Metabolism                                      | transferase                                      | activity                                                        |                         |
| CA5308 | 0.9 | 1.0 | 1.1 | PRE5       | 15986569..20S proteasome subur                | orf19.7178 | 2171  | IPF2172    | PROTEIN I                                       | structural_molecule                              | activity                                                        |                         |
| CA5309 | 0.9 | 0.9 | 0.9 | IPF2170    | complemer similar to saccharomyc              | orf19.7179 | 2170  | CaPRE5     | PROTEIN I                                       | peptidase                                        | activity                                                        |                         |
| CA5310 | 0.9 | 1.1 | 1.0 | IPF2167    | complemer unknown function                    | orf19.7181 | 2167  | IPF2170    | PROTEIN FATE [folding modification destination] | ""CELLULAR TRANSPORT AND TRANSPORT MECHANISMS "" | CELL RESCUE DEFENI                                              |                         |
| CA5311 | 1.0 | 1.0 | 1.0 | IPF2166    | 15991528..unknown function                    | orf19.7182 | 2166  | IPF2167    | PROTEIN FATE [folding modification destination] | ""                                               | SUBCELLULAR LOCALISATION                                        |                         |
| CA5312 | 0.9 | 0.9 | 1.0 | IPF2165    | complemer unknown function                    | orf19.7183 | 2165  | IPF2166    | UNCLASSI                                        | molecular_function                               | unknown                                                         |                         |
| CA5313 | 0.9 | 1.0 | 1.0 | IPF2163    | 15993216..unknown function                    | orf19.7184 | 2163  | IPF2165    | UNCLASSI                                        | molecular_function                               | unknown                                                         |                         |
| CA5314 | 1.0 | 0.9 | 1.0 | HAT2       | 15993846..Subunit of the major ye             | orf19.7185 | 2161  | IPF2163    | UNCLASSIFIED                                    | PROTEINS                                         |                                                                 |                         |
| CA5315 | 1.1 | 1.1 | 1.0 | CYB2       | 15996981..B-type cyclin                       | orf19.7186 | 2159  | CaHAT2     | TRANSCRIPTION ""                                | PROTEIN FATE [folding modification destination]  | ""SUBCELLULAR LOCALISATION                                      |                         |
| CA5316 | 1.0 | 1.1 | 1.0 | MAM33      | 15998865..Mitochondrial acidic m              | orf19.7187 | 2157  | CaCYB2     | CELL CYC                                        | protein_kinase                                   | activity,enzyme_regulator                                       | activity                |
| CA5317 | 1.8 | 2.9 | 1.6 | RPP1B      | 16000013..Acidic ribosomal protei             | orf19.7188 | 2156  | CaMAM33    | SUBCELL                                         | molecular_function                               | unknown                                                         |                         |
| CA5318 | 1.0 | 1.0 | 1.1 | OGG1       | complemer 8-oxoguanine DNA gly                | orf19.7190 | 2154  | CaRPP1B    | PROTEIN                                         | SYNTHESIS                                        | SUBCELLULAR LOCALISATION                                        |                         |
| CA5319 | 1.0 | 1.1 | 1.0 | IPF2150    | 16002602..similar to protein invol            | orf19.7193 | 2150  | CaOGG1     | CELL CYC                                        | DNA binding                                      |                                                                 |                         |
| CA5320 | 1.0 | 0.9 | 1.0 | IPF2147    | 16004783..unknown function                    | orf19.7194 | 2147  | IPF2150    | Amino acid                                      | molecular_function                               | unknown                                                         |                         |
| CA5321 | 1.1 | 0.9 | 1.1 | RAD6.3     | complemer Ubiquitin protein ligase            | orf19.7195 | 2145  | IPF2147    | No significant                                  | S.c. match                                       |                                                                 |                         |
| CA5322 | 1.4 | 1.5 | 1.1 | PRB1       | complemer Protease B, vacuolar (l             | orf19.7196 | 2144  | CaRAD6.3   | CELL CYCLE                                      | AND DNA PROCESSING                               | TRANSCRIPTION ""PROTEIN FATE [folding modification destination] | ""CELL FATE SUBCELLUL   |
| CA5323 | 0.9 | 1.0 | 1.0 | IPF2142    | complemer unknown function                    | orf19.7197 | 2142  | CaPRB1     | PROTEIN I                                       | peptidase                                        | activity                                                        |                         |



|        |     |     |     |           |                                                |             |       |           |                                                                                                        |
|--------|-----|-----|-----|-----------|------------------------------------------------|-------------|-------|-----------|--------------------------------------------------------------------------------------------------------|
| CA5324 | 0.9 | 0.6 | 1.0 | IPF2140   | complemer unknown function                     | orf19.7198  | 2140  | IPF2142   | PROTEIN I protein binding                                                                              |
| CA5325 | 1.0 | 1.0 | 0.9 | IPF2138   | 16013645..unknown function                     | orf19.7199  | 2138  | IPF2140   | UNCLASSI molecular_function unknown                                                                    |
| CA5326 | 1.4 | 1.1 | 1.3 | IPF2137   | 16014422..unknown function                     | orf19.7200  | 2137  | IPF2138   | UNCLASSI molecular_function unknown                                                                    |
| CA5327 | 1.1 | 1.0 | 1.0 | SLA2      | complemer Cytoskeleton assembly                | orf19.7201  | 2136  | IPF2137   | No significant S.c. match                                                                              |
| CA5328 | 1.0 | 1.1 | 1.0 | RER1      | complemer Required for correct lo              | orf19.7202  | 2132  | CaSLA2    | Nucleotide structural molecule activity                                                                |
| CA5329 | 1.0 | 0.9 | 1.0 | MRP7      | complemer Mitochondrial ribosom                | orf19.7203  | 2131  | CaRER1    | PROTEIN I molecular_function unknown                                                                   |
| CA5330 | 1.0 | 1.0 | 1.0 | IPF2130   | 16022187..similar to 2-nitroprop               | orf19.7204  | 2130  | CaMRP7    | PROTEIN I structural molecule activity                                                                 |
| CA5331 | 1.0 | 1.0 | 1.0 | DUR33     | complemer Urea transport protein               | orf19.7205  | 901   | IPF2130   | Nitrogen ar molecular_function unknown                                                                 |
| CA5332 | 1.0 | 1.0 | 0.9 | IPF900.3  | 16026752..unknown function, , 3-               | orf19.7206  | 900   | CaDUR33   | REGULATION OF/INTERACTION WITH CELLULAR ENVIRONMENT SUBCELLULAR LOCALISATION TRANSPORT FACILITATION    |
| CA5333 | 1.0 | 1.1 | 1.0 | DOA4      | complemer ubiquitin-specific isope             | orf19.7207  | 899   | IPF900.3  | UNCLASSI molecular_function unknown                                                                    |
| CA5334 | 1.1 | 1.0 | 1.1 | SMK1      | 16031171..MAP kinase (by homol                 | orf19.7208  | 895   | CaDOA4    | PROTEIN I peptidase activity                                                                           |
| CA5335 | 1.0 | 1.2 | 1.1 | IPF894    | 16032418..unknown function                     | orf19.7209  | 894   | CaSMK1    | CELLULAF protein kinase activity,signal transducer activity                                            |
| CA5336 | 1.1 | 0.8 | 1.1 | IPF893    | 16033135..unknown function                     | orf19.7210  | 893   | IPF894    | CELL FATE SUBCELLULAR LOCALISATION PROTEIN ACTIVITY REGULATION                                         |
| CA5337 | 1.0 | 0.9 | 1.0 | APL1      | 16034302..AP-2 complex subunit,                | orf19.7212  | 891   | IPF893    | UNCLASSI molecular_function unknown                                                                    |
| CA5338 | 1.0 | 1.0 | 1.0 | IPF889    | complemer ATP-dependent RNA t                  | orf19.7213  | 889   | CaAPL1    | PROTEIN I molecular_function unknown                                                                   |
| CA5339 | 1.1 | 1.4 | 1.3 | IPF885    | 16040381..glucan 1,3-beta-glucos               | orf19.7214  | 885   | IPF889    | CLASSIFIC helicase activity                                                                            |
| CA5340 | 1.0 | 1.0 | 0.9 | IPF883    | 16042494..unknown function                     | orf19.7215  | 883   | IPF885    | C-compour molecular_function unknown                                                                   |
| CA5341 | 1.2 | 1.1 | 1.1 | HSP10.3   | 16048241..10 kDa mitochondrial heat shock c    |             | 878   | IPF883    | UNCLASSI RNA binding                                                                                   |
| CA5342 | 1.2 | 1.3 | 1.2 | YPT521    | 16048974..GTP-binding protein of               | orf19.7216  | 877   | CaHSP10.3 | PROTEIN I chaperone activity                                                                           |
| CA5343 | 1.9 | 2.0 | 1.3 | RPL4B     | complemer Ribosomal protein L4B                | orf19.7217  | 875   | CaYPT521  | PROTEIN I hydrolase activity                                                                           |
| CA5344 | 0.8 | 2.6 | 0.9 | PRY2      | complemer putative pathogen relai              | orf19.7218  | 872   | CaRPL4B   | PROTEIN I structural molecule activity                                                                 |
| CA5345 | 2.6 | 4.2 | 2.2 | FTR1      | 16056888..high affinity iron perme             | orf19.7219  | 868   | CaPRY2    | CELL FATI molecular_function unknown                                                                   |
| CA5346 | 1.0 | 0.9 | 1.1 | IPF867    | complemer unknown function                     | orf19.7221  | 867   | CaFTR1    | REGULATI transporter activity                                                                          |
| CA5347 | 0.9 | 0.9 | 1.0 | IPF864    | complemer unknown function                     | orf19.7222  | 864   | IPF867    | UNCLASSI hydrolase activity                                                                            |
| CA5348 | 1.0 | 1.0 | 1.1 | IPF863    | 16064221..involved in inositol bios            | orf19.7223  | 863   | IPF864    | UNCLASSI molecular_function unknown                                                                    |
| CA5349 | 1.1 | 1.1 | 1.0 | IPF861    | 16066337..unknown function                     | orf19.7224  | 861   | IPF863    | C-compour molecular_function unknown                                                                   |
| CA5350 | 1.0 | 0.9 | 1.0 | IPF859    | 16068549..unknown function                     | orf19.7225  | 859   | IPF861    | UNCLASSI molecular_function unknown                                                                    |
| CA5351 | 1.0 | 0.9 | 0.8 | IPF857    | complemer unknown function                     | orf19.7227  | 857   | IPF859    | No significant S.c. match                                                                              |
| CA5352 | 1.0 | 1.1 | 1.1 | IPF856    | 16070891..unknown function                     | orf19.7228  | 856   | IPF857    | UNCLASSI molecular_function unknown                                                                    |
| CA5353 | 1.0 | 0.9 | 1.1 | IML2      | complemer unknown function                     | orf19.7229  | 855   | IPF856    | UNCLASSI molecular_function unknown                                                                    |
| CA5354 | 1.2 | 1.4 | 1.1 | FTR2      | complemer high affinity iron perme             | orf19.7231  | 853   | CaIML2    | UNCLASSI molecular_function unknown                                                                    |
| CA5355 | 1.1 | 0.9 | 1.0 | IRR1.3F   | complemer cohesin complex subui                | orf19.7232  | 850   | CaFTR2    | REGULATION OF/INTERACTION WITH CELLULAR ENVIRONMENT SUBCELLULAR LOCALISATION TRANSPORT FACILITATION UN |
| CA5356 | 1.0 | 1.0 | 0.9 | IRR1.5F   | complemer cohesin complex subui                | orf19.7233  | 849   | CaIRR1.3F | CELL CYCLE AND DNA PROCESSING SUBCELLULAR LOCALISATION                                                 |
| CA5357 | 1.1 | 0.9 | 1.0 | RSC8      | 16082295..chromatin remodeling                 | orf19.7234  | 848   | CaIRR1.5F | CELL CYC protein binding                                                                               |
| CA5358 | 1.0 | 0.9 | 1.0 | IPF846    | complemer WD-repeat protein, bet               | orf19.7235  | 846   | CaRSC8    | CELL CYC molecular_function unknown                                                                    |
| CA5359 | 1.1 | 1.1 | 1.0 | TIF35     | complemer translation initiation fac           | orf19.7236  | 842   | IPF846    | UNCLASSI molecular_function unknown                                                                    |
| CA5360 | 1.0 | 1.1 | 1.0 | IPF839    | 16088591..unknown function                     | orf19.7237  | 839   | CaTIF35   | PROTEIN I translation regulator activity                                                               |
| CA5361 | 1.0 | 1.1 | 1.0 | NPL3      | complemer nucleolar shuttling prot             | orf19.7238  | 837   | IPF839    | UNCLASSI molecular_function unknown                                                                    |
| CA5362 | 1.3 | 1.6 | 0.9 | IPF836.3  | complemer regulation of G-protein              | orf19.7239  | 836   | CaNPL3    | TRANSCR RNA binding                                                                                    |
| CA5363 | 0.9 | 0.7 | 1.2 | NCR1      | complemer Polytopic membrane p                 | orf19.7242  | 829   | IPF836.3  | CELLULAF DNA binding                                                                                   |
| CA5364 | 0.9 | 0.9 | 1.0 | DCD1      | 16098318..deoxycytidylate deamii               | orf19.7243  | 825   | CaNCR1    | Lipid fatty-z: molecular_function unknown                                                              |
| CA5365 | 1.1 | 1.0 | 0.9 | IPF824    | complemer 2-hydroxyhepta-2,4-die               | orf19.7244  | 824   | CaDCD1    | Nucleotide hydrolase activity                                                                          |
| CA5366 | 0.9 | 0.9 | 0.9 | IPF823    | 16100311..rRNA (5-methylaminon                 | orf19.7245  | 823   | IPF824    | UNCLASSI molecular_function unknown                                                                    |
| CA5367 | 0.9 | 1.0 | 1.0 | RIM101    | complemer Zn finger transcription              | orf19.7247  | 822   | IPF823    | UNCLASSI transferase activity                                                                          |
| CA5368 | 1.0 | 1.1 | 1.0 | IPF5257   | 16105366..unknown function                     | orf19.7250  | 5257  | CaRIM101  | CELL CYC transcription regulator activity                                                              |
| CA5369 | 1.0 | 1.3 | 1.0 | WSC4      | complemer Cell wall integrity by hc            | orf19.7251  | 5256  | IPF5257   | UNCLASSIFIED PROTEINS                                                                                  |
| CA5370 | 0.9 | 1.1 | 0.9 | IPF5248   | complemer unknown function                     | orf19.7254  | 5248  | CaWSC4    | CELL RES signal transducer activity                                                                    |
| CA5371 | 1.0 | 0.8 | 1.1 | RPC10     | 16110659..DNA-directed RNA pol                 | orf19.7255  | 5246  | IPF5248   | UNCLASSI molecular_function unknown                                                                    |
| CA5372 | 1.0 | 1.1 | 1.0 | MLH3      | complemer DNA mismatch repair                  | orf19.7257  | 5245  | CaRPC10   | No signific: nucleotidytransferase activity                                                            |
| CA5373 | 1.1 | 1.1 | 1.0 | IPF5243   | 16112726..snRNP (by homology)                  | orf19.7256  | 5243  | CaMLH3    | CELL CYC molecular_function unknown                                                                    |
| CA5374 | 1.0 | 1.0 | 1.0 | DDI1      | 16113118..Response to DNA alky                 | orf19.7258  | 5241  | IPF5243   | TRANSCR RNA binding                                                                                    |
| CA5375 | 1.0 | 1.0 | 1.0 | IPF5239   | complemer similarity to aldose red             | orf19.7260  | 5239  | CaDDI1    | CELL RES protein binding                                                                               |
| CA5376 | 1.4 | 2.0 | 1.3 | GD11      | complemer GDP dissociation inhib               | orf19.7261  | 5237  | IPF5239   | C-compound and carbohydrate metabolism                                                                 |
| CA5377 | 1.0 | 1.0 | 1.0 | IPF5234   | complemer X-Pro dipeptidase (by                | lorf19.7263 | 5234  | CaGD11    | CELLULAF enzyme regulator activity                                                                     |
| CA5378 | 1.0 | 1.1 | 1.1 | MPR1      | 16117776..26S proteasome regul                 | orf19.7264  | 5231  | IPF5234   | PROTEIN I peptidase activity                                                                           |
| CA5379 | 1.0 | 1.1 | 1.0 | IPF5228.5 | 16118769..similar to Saccharomy                | orf19.7265  | 5228  | CaMPR1    | PROTEIN I peptidase activity                                                                           |
| CA5380 | 1.1 | 1.1 | 1.1 | IPF5224   | complemer unknown function                     | orf19.7267  | 5224  | IPF5228.5 | TRANSCR RNA binding                                                                                    |
| CA5381 | 1.0 | 1.1 | 1.1 | IPF5222   | complemer arylalkylamine n-acetyl              | orf19.7269  | 5222  | IPF5224   | No significant S.c. match                                                                              |
| CA5382 | 1.1 | 1.4 | 1.1 | IPF5217   | 16122809..unknown function                     | orf19.7270  | 5217  | IPF5222   | UNCLASSI molecular_function unknown                                                                    |
| CA5383 | 1.1 | 1.1 | 1.0 | ZORRO1B   | complemer reverse transcriptase, '             | orf19.7273  | 14000 | IPF5217   | No significant S.c. match                                                                              |
| CA5384 | 0.9 | 0.9 | 1.0 | ZORRO1B   | complemer reverse transcriptase, '             | orf19.7274  | 14001 | CaZorro1b | No significant S.c. match                                                                              |
| CA5385 | 1.1 | 1.0 | 1.0 | ZORRO2B   | complemer reverse transcriptase, '             | orf19.7275  | 14003 | CaZorro1b | No significant S.c. match                                                                              |
| CA5386 | 0.9 | 1.0 | 1.0 | ZORRO2B   | complemer Putative gag protein, 5              | orf19.7277  | 14005 | CaZorro2b | No significant S.c. match                                                                              |
| CA5387 | 1.7 | 2.1 | 0.8 | CTA24.3   | complemer transcriptional activator, 3-prime e |             | 14006 | CaZorro2b | No significant S.c. match                                                                              |
| CA5388 | 0.9 | 1.0 | 0.7 | PET9      | complemer ADP/ATP carrier prote                | orf19.8545  | 6536  | CaCTA24.3 | No significant S.c. match                                                                              |
| CA5389 | 1.0 | 0.8 | 1.1 | IFA13     | complemer unknown function                     | orf19.931   | 6533  | CaPET9    | Nucleotide transporter activity                                                                        |
| CA5390 |     |     |     | DRS24     | complement(16139225..16144375)                 |             |       | CaIFA13   | C-compound and carbohydrate metabolism TRANSCRIPTION SUBCELLULAR LOCALISATION                          |
| CA5391 | 1.0 | 1.0 | 1.0 | IPF18109  | 16147634..unknown function                     | orf19.934   | 18109 |           |                                                                                                        |
| CA5392 | 0.9 | 0.9 | 0.8 | IPF10571  | 16158605..Unknown function                     | orf19.935   | 10571 | IPF18109  | No significant S.c. match                                                                              |
| CA5393 | 1.0 | 1.9 | 1.0 | IPF9398   | complemer unknown function                     | orf19.936   | 9398  | IPF10571  | No significant S.c. match                                                                              |
| CA5394 | 1.0 | 1.0 | 1.1 | IPF9400   | complemer unknown function                     | orf19.937   | 9400  | IPF9398   | No significant S.c. match                                                                              |
| CA5395 | 1.0 | 0.9 | 1.0 | IPF9401   | complemer unknown function                     | orf19.938   | 9401  | IPF9400   | UNCLASSIFIED PROTEINS                                                                                  |

|        |     |     |     |            |                                                  |                  |                                                                                                                 |
|--------|-----|-----|-----|------------|--------------------------------------------------|------------------|-----------------------------------------------------------------------------------------------------------------|
| CA5396 | 1.1 | 1.3 | 1.0 | NAM7       | complemer nonsense-mediated mlorf19.939          | 9662 IPF9401     | No significant S.c. match                                                                                       |
| CA5397 | 1.0 | 1.1 | 1.0 | IPF9663    | 16175902..similar to Saccharomy orf19.940        | 9663 CaNAM7      | Nucleotide helicase activity                                                                                    |
| CA5398 | 1.0 | 0.9 | 1.1 | SEC14      | 16181246..phosphatidylinositol(PI orf19.941      | 9666 IPF9663     | CELL FAT1 signal transducer activity                                                                            |
| CA5399 | 1.0 | 0.8 | 1.0 | KRE62.5F   | 16183259..Glucan synthase subu orf19.942         | 1538 CaSEC14     | Lipid fatty-ε transporter activity                                                                              |
| CA5400 | 1.0 | 1.0 | 1.0 | KRE62.3F   | 16185108..Glucan synthase subunit, 3-prime       | 1539 CaKRE62.!   | C-compound and carbohydrate metabolism CELL FATE CONTROL OF CELLULAR ORGANIZATION SUBCELLULAR LOCALISATION      |
| CA5401 | 1.0 | 1.0 | 1.0 | FET35.3    | 16185517..Cell surface ferroxidas orf19.943      | 1540 CaKRE62.:   | No significant S.c. match                                                                                       |
| CA5402 | 1.0 | 0.8 | 1.0 | IFG3.3     | 16188612..probable d-amino acid orf19.944        | 1541 CaFET35.:   | CELLULAR TRANSPORT AND TRANSPORT MECHANISMS REGULATION OF/INTERACTION WITH CELLULAR ENVIRONMENT SUB             |
| CA5403 | 0.9 | 0.9 | 0.9 | IPF1542    | 16189271..unknown function orf19.945             | 1542 CaIFG3.3    | No significant S.c. match                                                                                       |
| CA5404 | 1.1 | 1.0 | 1.2 | MET14      | complemer Adenylylsulfate kinase orf19.946       | 1543 IPF1542     | PROTEIN I protein binding                                                                                       |
| CA5405 | 1.0 | 1.0 | 1.1 | MRP17      | 16191360..Mitochondrial ribosom: orf19.947       | 1544 CaMET14     | Amino acid transferase activity                                                                                 |
| CA5406 | 1.0 | 1.1 | 1.1 | IPF1547    | 16193043..unknown function orf19.949             | 1547 CaMRP17     | PROTEIN ! structural molecule activity                                                                          |
| CA5407 | 1.3 | 1.1 | 1.0 | IPF1548    | 16197395..unknown function orf19.951             | 1548 IPF1547     | PROTEIN FATE [folding modification destination] ""CELLULAR TRANSPORT AND TRANSPORT MECHANISMS CONTROL OF CELLUL |
| CA5408 | 1.0 | 1.0 | 1.0 | IPF1551    | complemer unknown function orf19.952             | 1551 IPF1548     | No significant S.c. match                                                                                       |
| CA5409 | 0.5 | 1.0 | 1.0 | COF1       | complemer cofilin (by homology)                  | 1554 IPF1551     | No significant S.c. match                                                                                       |
| CA5410 | 1.0 | 1.0 | 1.0 | IPF1557    | 16203444..similar to dnaJ proteins orf19.954     | 1557 CaCOF1      | PROTEIN I protein binding                                                                                       |
| CA5411 | 1.0 | 1.1 | 1.1 | IPF1558    | complemer unknown function orf19.955             | 1558 IPF1557     | PROTEIN FATE [folding modification destination]                                                                 |
| CA5412 | 1.1 | 1.1 | 1.0 | IPF1566    | 16206178..unknown function orf19.956             | 1566 IPF1558     | No significant S.c. match                                                                                       |
| CA5413 | 1.0 | 1.0 | 1.1 | IPF1567    | complemer mitochondrial ribosomal protein L3     | 1567 IPF1566     | UNCLASSI molecular_function unknown                                                                             |
| CA5414 | 1.0 | 1.0 | 1.0 | IPF1568    | 16215716..unknown function orf19.962             | 1568 IPF1567     | PROTEIN ! structural molecule activity                                                                          |
| CA5415 | 1.0 | 1.0 | 0.9 | SMC4       | 16216486..Stable Maintenance of orf19.964        | 1574 IPF1568     | TRANSCR nucleotidyltransferase activity                                                                         |
| CA5416 | 1.0 | 0.9 | 1.0 | IPF1576    | complemer unknown function orf19.966             | 1576 CaSMC4      | CONTROL hydrolase activity                                                                                      |
| CA5417 | 1.1 | 1.0 | 1.1 | NUC1       | 16222130..Nuclease, mitochondri: orf19.967       | 1578 IPF1576     | UNCLASSIFIED PROTEINS                                                                                           |
| CA5418 | 1.1 | 1.8 | 1.1 | IPF1580    | complemer unknown function orf19.968             | 1580 CaNUC1      | Nucleotide RNA binding                                                                                          |
| CA5419 | 0.9 | 1.0 | 0.9 | PRS1       | complemer Ribose-phosphate pyr: orf19.969        | 1582 IPF1580     | UNCLASSI molecular_function unknown                                                                             |
| CA5420 | 1.1 | 1.0 | 1.0 | IPF1583    | 16226306..unknown function orf19.970             | 1583 CaPRS1      | Amino acid transferase activity                                                                                 |
| CA5421 | 1.0 | 1.0 | 1.0 | SKN7       | complemer Transcription factor (b) orf19.971     | 1586 IPF1583     | UNCLASSI molecular_function unknown                                                                             |
| CA5422 | 1.0 | 1.0 | 1.0 | IPF1588    | 16229370..unknown function orf19.972             | 1588 CaSKN7      | CELL CYC signal transducer activity,transcription regulator activity,DNA binding                                |
| CA5423 | 1.1 | 1.2 | 1.0 | ROT2       | complemer Glucosidase II, catalyti orf19.974     | 1591 IPF1588     | UNCLASSI molecular_function unknown                                                                             |
| CA5424 | 1.2 | 1.3 | 1.0 | IPF1598    | 16233612..unknown function orf19.976             | 1598 CaROT2      | C-compour hydrolase activity                                                                                    |
| CA5425 | 0.9 | 1.0 | 0.9 | BDF1       | 16236647..sporulation protein (by orf19.978      | 1604 IPF1598     | UNCLASSI ligase activity                                                                                        |
| CA5426 | 1.2 | 1.2 | 1.7 | FAS1       | 16239835..Fatty-acyl-CoA synthas orf19.979       | 1611 CaBDF1      | TRANSCR transcription regulator activity                                                                        |
| CA5427 |     |     |     | IPF1615.3f | complement(16245992..16248238)                   | CaFAS1           | Lipid fatty-ε lyase activity                                                                                    |
| CA5428 | 1.0 | 1.3 | 1.0 | BOI2       | 16251930..budding protein (by ho orf19.3230      | 179              |                                                                                                                 |
| CA5429 | 1.0 | 1.0 | 0.9 | CDC27      | 16256263..subunit of anaphase-pi orf19.3231      | 185 CaBOI2       | CELL FATE                                                                                                       |
| CA5430 | 0.9 | 0.9 | 1.0 | IPF191     | complemer putative permease (by orf19.3232       | 191 CaCDC27      | CELL CYC protein binding                                                                                        |
| CA5431 | 0.6 | 0.3 | 0.8 | IPF195     | 16266757..unknown function orf19.3233            | 195 IPF191       | TRANSPORT FACILITATION                                                                                          |
| CA5432 | 1.0 | 1.0 | 0.9 | EBP5       | complemer NADPH dehydrogenas orf19.3234          | 197 IPF195       | CELLULAF protein binding                                                                                        |
| CA5433 | 1.0 | 0.9 | 1.0 | SFT1       | 16270617..SNARE-like protein (by homology)       | 198 CaEBP5       | ENERGY transporter activity                                                                                     |
| CA5434 | 1.0 | 1.1 | 1.1 | IPF199     | complemer F-actin capping protein orf19.3235     | 199 CaSFT1       | CELLULAF transporter activity                                                                                   |
| CA5435 | 1.0 | 1.1 | 1.1 | UFD4       | complemer ubiquitin fusion degrad orf19.3237     | 204 IPF199       | CELL FAT1 protein binding                                                                                       |
| CA5436 | 1.0 | 1.0 | 1.0 | CTF18      | 16284780..chromosome transmiss: orf19.3239       | 217 CaUFD4       | PROTEIN I ligase activity                                                                                       |
| CA5437 | 0.9 | 1.0 | 1.0 | ERG27      | 16287570..3-keto sterol reductase orf19.3240     | 218 CaCTF18      | CELL CYC molecular_function unknown                                                                             |
| CA5438 | 1.1 | 1.2 | 1.1 | IPF223     | complemer unknown function orf19.3241            | 223 CaERG27      | Lipid fatty-ε oxidoreductase activity                                                                           |
| CA5439 | 1.1 | 1.1 | 1.0 | TAF25      | 16293173..transcription initiation f: orf19.3242 | 224 IPF223       | UNCLASSI molecular_function unknown                                                                             |
| CA5440 | 1.0 | 0.9 | 0.8 | SRP54      | complemer 54 kD signal recognitio orf19.3243     | 225 CaTAF25      | TRANSCR transcription regulator activity                                                                        |
| CA5441 | 1.1 | 1.1 | 1.1 | IPF227     | 16295956..unknown function orf19.3244            | 227 CaSRP54      | PROTEIN FATE [folding modification destination] ""SUBCELLULAR LOCALISATION                                      |
| CA5442 | 1.2 | 1.1 | 1.1 | IPF18105.: | complemer unknown function, 3-pr orf19.3245      | 228 IPF227       | UNCLASSI molecular_function unknown                                                                             |
| CA5443 | 1.0 | 0.9 | 1.0 | IPF18105.† | complemer unknown function, 3-pr orf19.3246      | 18105 IPF18105.: | No significant S.c. match                                                                                       |
| CA5444 | 1.0 | 1.0 | 1.0 | IPF230     | complemer unknown function orf19.3247            | 230 IPF18105.†   | No significant S.c. match                                                                                       |
| CA5445 | 1.1 | 1.0 | 1.0 | IPF232     | complemer unknown function orf19.3248            | 232 IPF230       | UNCLASSI molecular_function unknown                                                                             |
| CA5446 | 1.0 | 1.0 | 1.0 | LAG1       | complemer longevity-assurance pr orf19.3249      | 233 IPF232       | UNCLASSIFIED PROTEINS                                                                                           |
| CA5447 | 1.1 | 1.1 | 1.0 | IPF234     | 16309970..similar to Saccharomy orf19.3250       | 234 CaLAG1       | Lipid fatty-ε transporter activity                                                                              |
| CA5448 | 1.0 | 1.0 | 1.0 | ARC19.EX   | 16312095..subunit of the Arp2/3 c orf19.3251     | 235 IPF234       | TRANSCR RNA binding                                                                                             |
| CA5449 | 0.9 | 0.9 | 0.9 | DAL81      | complemer Transcriptional activat orf19.3252     | 236 CaARC19.:    | CELLULAF structural molecule activity                                                                           |
| CA5450 | 1.0 | 0.9 | 1.1 | IPF243     | 16316783..unknown function orf19.3254            | 243 CaDAL81      | Amino acid transcription regulator activity                                                                     |
| CA5451 | 1.0 | 1.0 | 1.0 | SLN1       | 16321174..Two-component signal orf19.3256        | 250 IPF243       | No significant S.c. match                                                                                       |
| CA5452 | 1.0 | 0.9 | 1.1 | SEC11      | complemer signal peptidase subur orf19.3259      | 252 CaSLN1       | C-compour signal transducer activity,protein kinase activity                                                    |
| CA5453 | 0.9 | 1.1 | 0.9 | IPF256     | 16328198..control of gene expres: orf19.3260     | 256 CaSEC11      | PROTEIN I peptidase activity                                                                                    |
| CA5454 | 1.1 | 1.0 | 1.1 | IPF257.3   | complemer member of the FRP fa orf19.3261        | 257 IPF256       | CELL RES lyase activity                                                                                         |
| CA5455 | 0.9 | 0.8 | 0.8 | IPF263.3   | complemer member of the FRP fa orf19.3263        | 263 IPF257.3     | C-compound and carbohydrate metabolism                                                                          |
| CA5456 | 0.9 | 0.9 | 1.0 | IPF267     | complemer unknown function orf19.3264            | 267 IPF263.3     | C-compound and carbohydrate metabolism                                                                          |
| CA5457 | 1.1 | 1.0 | 1.0 | TRM1       | complemer N2,N2-dimethylguanin: orf19.3265       | 272 IPF267       | CELL CYCLE AND DNA PROCESSING SUBCELLULAR LOCALISATION                                                          |
| CA5458 | 0.8 | 0.8 | 0.8 | IPF274     | complemer unknown function orf19.3266            | 274 CaTRM1       | TRANSCR transferase activity                                                                                    |
| CA5459 | 1.0 | 1.0 | 1.0 | IPF276     | 16347302..unknown function orf19.3267            | 276 IPF274       | No significant S.c. match                                                                                       |
| CA5460 | 1.2 | 1.4 | 1.1 | IPF277     | 16348709..human IgE-dependent orf19.3268         | 277 IPF276       | UNCLASSI molecular_function unknown                                                                             |
| CA5461 | 0.9 | 0.9 | 1.0 | GSL23.5F   | 16350075..1,3-beta-D-glucan synt orf19.3269      | 279 IPF277       | PROTEIN ! molecular_function unknown                                                                            |
| CA5462 | 1.0 | 1.0 | 1.0 | GSL23.3F   | 16352359..1,3-beta-D-glucan synt orf19.3270      | 282 CaGSL23.:    | C-compound and carbohydrate metabolism SUBCELLULAR LOCALISATION                                                 |
| CA5463 | 1.2 | 1.0 | 0.9 | IPF284     | complemer unknown function orf19.3272            | 284 CaGSL23.:    | C-compound and carbohydrate metabolism CELL FATE SUBCELLULAR LOCALISATION                                       |
| CA5464 | 1.0 | 1.0 | 1.0 | IPF285.5F  | 16356515..unknown function, 5-pr orf19.3273      | 285 IPF284       | CELL RESCUE DEFENSE AND VIRULENCE ""CELL FATE                                                                   |
| CA5465 | 1.0 | 0.9 | 1.2 | IPF285.3F  | 16357131..unknown function, 3-pr orf19.3274      | 286 IPF285.5f    | UNCLASSI molecular_function unknown                                                                             |
| CA5466 | 1.0 | 1.0 | 1.0 | PWP2       | 16358168..periodic tryptophan prc orf19.3276     | 290 IPF285.3f    | UNCLASSIFIED PROTEINS                                                                                           |
| CA5467 | 1.6 | 1.5 | 1.3 | GSY1       | 16362931..UDP glucose--starch g orf19.3278       | 294 CaPWP2       | CELL CYC RNA binding                                                                                            |

|        |     |     |     |           |                                             |            |                |                                                                               |
|--------|-----|-----|-----|-----------|---------------------------------------------|------------|----------------|-------------------------------------------------------------------------------|
| CA5468 | 0.7 | 0.7 | 1.0 | IFF7      | 16365701..unknown function                  | orf19.3279 | 296 CaGSY1     | C-compour transferase activity                                                |
| CA5469 | 1.0 | 1.0 | 1.1 | IPF298    | 16369927..unknown function                  | orf19.3281 | 298 CalFF7     | UNCLASSIFIED PROTEINS                                                         |
| CA5470 | 1.5 | 1.2 | 1.3 | IPF300    | 16372420..unknown function                  | orf19.3282 | 300 IPF298     | UNCLASSImolecular_function unknown                                            |
| CA5471 | 0.9 | 0.9 | 0.9 | IPF302    | 16374836..short chain dehydroge             | orf19.3283 | 302 IPF300     | UNCLASSIFIED PROTEINS                                                         |
| CA5472 | 0.9 | 0.9 | 1.1 | IPF16948  | complemer unknown function                  | orf19.3285 | 16948 IPF302   | Lipid fatty-oxidoreductase activity                                           |
| CA5473 | 0.9 | 1.0 | 0.9 | IPF16947  | 16377090..unknown function                  | orf19.3286 | 16947 IPF16948 | UNCLASSIFIED PROTEINS                                                         |
| CA5474 | 1.0 | 0.9 | 0.9 | IPF16944  | complemer unknown function, 3-pr            | orf19.3287 | 16944 IPF16947 | UNCLASSImolecular_function unknown                                            |
| CA5475 | 1.0 | 0.9 | 1.1 | IPF8532   | 16385207..unknown function                  | orf19.5303 | 8532 IPF16944  | UNCLASSImolecular_function unknown                                            |
| CA5476 | 1.1 | 1.0 | 1.1 | IPF8527   | 16388810..unknown function                  | orf19.5305 | 8527 IPF8532   | No significant S.c. match                                                     |
| CA5477 | 1.2 | 1.1 | 1.1 | IPF18101  | complemer unknown function                  | orf19.1276 | 18101 IPF8527  | No significant S.c. match                                                     |
| CA5478 | 1.0 | 1.0 | 1.0 | JEN2      | complemer carboxylic acid transp            | orf19.1276 | 8196 IPF18101  | No significant S.c. match                                                     |
| CA5479 | 1.0 | 1.0 | 1.0 | IPF8205   | complemer unknown function                  | orf19.5311 | 8205 CaJEN2    | C-compound and carbohydrate metabolism TRANSPORT FACILITATION                 |
| CA5480 | 1.0 | 1.1 | 1.0 | IPF8210   | complemer unknown function                  | orf19.5312 | 8210 IPF8205   | No significant S.c. match                                                     |
| CA5481 | 1.0 | 1.0 | 1.0 | IPF19810  | complemer unknown function                  | orf19.1277 | 19810 IPF8210  | Amino acid transcription regulator activity                                   |
| CA5482 | 1.0 | 1.1 | 0.9 | IPF14094  | 16424046..repeated protein (10 tir          | orf19.5315 | 7748 IPF19810  | No significant S.c. match                                                     |
| CA5483 | 1.0 | 0.9 | 1.0 | IPF817    | complemer unknown function                  | orf19.5316 | 817 IPF14094   | No significant S.c. match                                                     |
| CA5484 | 1.1 | 1.0 | 1.0 | RAD1.3F   | complemer UV endonuclease, con              | orf19.5318 | 815 IPF817     | UNCLASSIFIED PROTEINS                                                         |
| CA5485 | 1.0 | 0.9 | 1.0 | RAD1.53F  | complemer UV endonuclease, con              | orf19.5319 | 18099 CaRAD1.3 | CELL CYC DNA binding                                                          |
| CA5486 | 1.0 | 1.0 | 0.9 | IPF813    | 16434892..unknown function                  | orf19.5320 | 813 CaRAD1.5   | CELL CYCLE AND DNA PROCESSING SUBCELLULAR LOCALISATION                        |
| CA5487 | 1.0 | 1.0 | 1.1 | MET12     | complemer methylenetetrahydrofo             | orf19.5321 | 812 IPF813     | No significant S.c. match                                                     |
| CA5488 | 1.1 | 1.1 | 1.0 | IPF810    | complemer unknown function                  | orf19.5322 | 810 CaMET12    | Metabolism oxidoreductase activity                                            |
| CA5489 | 1.0 | 1.0 | 1.0 | MDH12     | 16438979..mitochondrial malate d            | orf19.5323 | 807 IPF810     | UNCLASSIenzyme regulator activity                                             |
| CA5490 | 1.1 | 0.9 | 1.0 | KIN3      | complemer G2-specific serine/thre           | orf19.5325 | 802 CaMDH12    | C-compour oxidoreductase activity                                             |
| CA5491 | 1.0 | 1.1 | 1.0 | IPF798    | 16443656..transcriptional regulato          | orf19.5326 | 798 CaKIN3     | CLASSIFICprotein kinase activity                                              |
| CA5492 | 1.2 | 1.1 | 1.0 | GCN1.3F   | complemer translational activator,          | orf19.5328 | 797 IPF798     | C-compour transcription regulator activity                                    |
| CA5493 | 1.1 | 1.0 | 1.1 | GCN1.5F   | complemer translational activator,          | orf19.5333 | 793 CaGCN1.3   | PROTEIN SYNTHESIS SUBCELLULAR LOCALISATION                                    |
| CA5494 | 1.0 | 1.1 | 1.1 | IPF85     | complemer similar to Saccharomy             | orf19.5334 | 785 CaGCN1.5   | PROTEIN Imolecular_function unknown                                           |
| CA5495 | 1.1 | 1.0 | 1.0 | SGS1      | 16453723..ATP-dependent DNA                 | orf19.5335 | 783 IPF85      | TRANSCR molecular_function unknown                                            |
| CA5496 | 1.1 | 1.1 | 1.0 | IPF779    | 16457414..E2 ubiquitin conjugatin           | orf19.5337 | 779 CaSGS1     | CELL CYC DNA binding,helicase activity                                        |
| CA5497 | 2.0 | 1.6 | 1.4 | IPF776    | 16459065..transcriptional activato          | orf19.5338 | 776 IPF779     | PROTEIN FATE [folding modification destination]                               |
| CA5498 | 1.2 | 1.1 | 1.1 | IPF772    | 16460511..unknown function                  | orf19.5340 | 772 IPF776     | C-compound and carbohydrate metabolism TRANSCRIPTION SUBCELLULAR LOCALISATION |
| CA5499 | 1.0 | 2.2 | 1.3 | RPS4A     | 16462327..ribosomal protein S4              | orf19.5341 | 771 IPF772     | PROTEIN Ienzyme regulator activity                                            |
| CA5500 | 1.1 | 1.2 | 1.1 | IPF768    | 16463208..unknown function                  | orf19.5342 | 768 CaRPS4A    | PROTEIN Istructural molecule activity                                         |
| CA5501 | 1.2 | 1.0 | 1.1 | MTR2.3    | complemer mRNA transport protein, 3-prime e | orf19.5343 | 767 IPF768     | UNCLASSImolecular_function unknown                                            |
| CA5502 | 0.7 | 0.7 | 1.0 | IPF763    | 16467039..putative transcription f          | orf19.5343 | 763 CaMTR2.3   | TRANSCR protein binding                                                       |
| CA5503 | 1.0 | 1.0 | 1.4 | DSK2      | 16468574..ubiquitin-like protein (b         | orf19.5345 | 761 IPF763     | TRANSCR transcription regulator activity                                      |
| CA5504 | 1.0 | 1.0 | 1.0 | TAF65     | 16469753..subunit of transcription          | orf19.5346 | 758 CaDSK2     | CELL CYCLE AND DNA PROCESSING SUBCELLULAR LOCALISATION                        |
| CA5505 | 1.1 | 2.3 | 1.0 | TPS3.3    | 16471311..alpha,alpha-trehalose-            | orf19.5348 | 753 CaTAF65    | TRANSCR transcription regulator activity                                      |
| CA5506 | 0.9 | 0.8 | 1.1 | IPF748    | complemer unknown function                  | orf19.5350 | 748 CaTPS3.3   | C-compour transferase activity                                                |
| CA5507 | 0.8 | 0.8 | 1.0 | TIF11     | 16475396..translation initiation fac        | orf19.5351 | 747 IPF748     | TRANSCR protein kinase activity                                               |
| CA5508 | 0.7 | 0.6 | 1.2 | IPF745    | complemer unknown function                  | orf19.5352 | 745 CaTIF11    | PROTEIN Itranslation regulator activity                                       |
| CA5509 | 1.0 | 1.0 | 1.0 | IPF743    | 16477379..unknown function                  | orf19.5353 | 743 IPF745     | UNCLASSIFIED PROTEINS                                                         |
| CA5510 | 1.0 | 1.0 | 0.9 | IPF741    | complemer unknown function                  | orf19.5356 | 741 IPF743     | TRANSPORT FACILITATION                                                        |
| CA5511 | 1.0 | 1.1 | 1.0 | AKL1      | complemer serine/threonine protei           | orf19.5357 | 737 IPF741     | UNCLASSImolecular_function unknown                                            |
| CA5512 | 1.0 | 1.1 | 1.0 | ORC2      | complemer origin recognition com            | orf19.5358 | 733 CaAKL1     | CELL CYC protein kinase activity                                              |
| CA5513 | 1.0 | 1.0 | 1.0 | RPC11     | 16485782..RNA polymerase III C1             | orf19.5360 | 731 CaORC2     | CELL CYC DNA binding                                                          |
| CA5514 | 1.0 | 0.9 | 1.0 | IPF730    | complemer unknown function                  | orf19.5362 | 730 CaRPC11    | TRANSCR nucleotidyltransferase activity                                       |
| CA5515 | 1.1 | 1.1 | 1.1 | SAT2      | complemer putative glycosyl-trans           | orf19.5363 | 728 IPF730     | No significant S.c. match                                                     |
| CA5516 | 0.9 | 1.1 | 0.9 | IPF726    | 16488869..rna binding protein (by           | orf19.5364 | 726 CaSAT2     | CELL RES molecular_function unknown                                           |
| CA5517 | 1.0 | 1.0 | 1.0 | IPF721.3F | complemer unknown function, 3-pr            | orf19.5365 | 724 IPF726     | CONTROL molecular_function unknown                                            |
| CA5518 | 1.0 | 1.1 | 1.0 | IPF721.5F | complemer unknown function, 5-pr            | orf19.5366 | 721 IPF721.3f  | UNCLASSIFIED PROTEINS                                                         |
| CA5519 | 0.9 | 1.0 | 1.0 | RDH54     | 16494038..helicase required for             | orf19.5367 | 718 IPF721.5f  | UNCLASSImolecular_function unknown                                            |
| CA5520 | 1.1 | 1.1 | 1.0 | IPF714    | complemer unknown function                  | orf19.5368 | 714 CaRDH54    | CELL CYC DNA binding                                                          |
| CA5521 | 1.1 | 1.1 | 1.0 | HEM12     | complemer uroporphyrinogen dec              | orf19.5369 | 712 IPF714     | UNCLASSImolecular_function unknown                                            |
| CA5522 | 1.1 | 1.3 | 1.1 | IPF708    | 16499832..unknown function                  | orf19.5370 | 708 CaHEM12    | Metabolism lyase activity                                                     |
| CA5523 | 1.0 | 1.0 | 0.9 | NIT2      | complemer Nitrilase (by homology,           | orf19.7279 | 2865 IPF708    | UNCLASSIFIED PROTEINS                                                         |
| CA5524 | 0.9 | 0.8 | 0.9 | IPF2861   | 16509683..putative pyruvate dehy            | orf19.7281 | 2861 CaNIT2    | Nitrogen ar hydrolase activity                                                |
| CA5525 | 0.9 | 1.0 | 0.9 | PEX13     | 16512069..Peroxisome import pro             | orf19.7282 | 2859 IPF2861   | Amino acid metabolism                                                         |
| CA5526 | 0.8 | 0.8 | 1.1 | IPF2857   | complemer unknown function                  | orf19.7284 | 2857 CaPEX13   | PROTEIN Iprotein binding                                                      |
| CA5527 | 0.9 | 0.9 | 0.9 | IPF2856   | complemer unknown function                  | orf19.7285 | 2856 IPF2857   | UNCLASSIFIED PROTEINS                                                         |
| CA5528 | 1.0 | 1.0 | 1.2 | RPN7      | complemer Subunit of the regulato           | orf19.7286 | 2855 IPF2856   | UNCLASSIRNA binding                                                           |
| CA5529 | 0.6 | 0.8 | 0.6 | IPF2852   | 16518952..putative acetyl-coenzy            | orf19.7288 | 2852 CaRPN7    | PROTEIN Ipeptidase activity                                                   |
| CA5530 | 1.1 | 1.1 | 1.0 | SPB8      | complemer Suppressor of PAB1 (t             | orf19.7290 | 2850 IPF2852   | No significant S.c. match                                                     |
| CA5531 | 0.9 | 1.0 | 1.0 | GCD14     | 16521513..Translational represso            | orf19.7291 | 2848 CaSPB8    | TRANSCR RNA binding                                                           |
| CA5532 | 1.0 | 1.1 | 1.0 | ARP2      | 16522913..actin-like protein (by            | orf19.7292 | 2847 CaGCD14   | PROTEIN Itransferase activity                                                 |
| CA5533 | 1.0 | 1.1 | 0.9 | IPF2846   | complemer similar to Saccharomy             | orf19.7293 | 2846 CaARP2    | CELL CYC structural molecule activity                                         |
| CA5534 | 0.9 | 1.0 | 0.9 | IPF2843   | complemer unknown function                  | orf19.7295 | 2843 IPF2846   | CELL CYC protein kinase activity                                              |
| CA5535 | 0.7 | 0.8 | 0.6 | IPF2839   | complemer unknown function                  | orf19.7296 | 2839 IPF2843   | PROTEIN Iprotein binding                                                      |
| CA5536 | 1.0 | 1.1 | 1.0 | IPF2837   | complemer putative cystathionine            | orf19.7297 | 2837 IPF2839   | No significant S.c. match                                                     |
| CA5537 | 1.1 | 1.0 | 1.0 | CHS2      | complemer Chitin synthase                   | orf19.7298 | 2836 IPF2837   | Amino acid lyase activity                                                     |
| CA5538 | 1.0 | 1.1 | 1.1 | IPF2830   | 16539029..unknown function                  | orf19.7300 | 2830 CaCHS2    | C-compour transferase activity                                                |
| CA5541 | 1.1 | 1.3 | 1.3 | IPF2827   | complemer unknown function                  | orf19.7303 | 2827 IPF2830   | No significant S.c. match                                                     |

|        |     |     |     |            |                                                 |                 |                                                                                                            |
|--------|-----|-----|-----|------------|-------------------------------------------------|-----------------|------------------------------------------------------------------------------------------------------------|
| CA5542 |     |     |     | IPF19812   | complement(16543967..16545445)                  | IPF2827         | No significant S.c. match                                                                                  |
| CA5543 | 0.9 | 0.8 | 1.0 | IPF5988    | complemer unknown function orf19.7305           | 5988            |                                                                                                            |
| CA5544 | 0.9 | 0.8 | 1.0 | IPF5987    | complemer unknown function orf19.7306           | 5987 IPF5988    | No significant S.c. match                                                                                  |
| CA5545 | 1.0 | 1.1 | 1.0 | IPF5986    | complemer similar to cytochrome-t orf19.7307    | 5986 IPF5987    | UNCLASSI molecular_function unknown                                                                        |
| CA5546 | 1.4 | 1.0 | 1.6 | TUB1.3     | complemer Alpha-1 tubulin, 3-prim orf19.7308    | 5983 IPF5986    | ENERGY molecular_function unknown                                                                          |
| CA5547 | 1.5 | 1.6 | 1.1 | IPF5981    | complemer similar to Saccharomy orf19.7310      | 5981 CaTUB1.3   | CELL CYC structural molecule activity                                                                      |
| CA5548 | 1.0 | 1.0 | 1.0 | IPF5978    | 16557890..unknown function orf19.7311           | 5978 IPF5981    | UNCLASSI molecular_function unknown                                                                        |
| CA5549 | 1.1 | 1.0 | 1.2 | ERG13      | complemer 3-hydroxy-3-methylglu orf19.7312      | 5977 IPF5978    | No significant S.c. match                                                                                  |
| CA5550 | 0.9 | 1.1 | 1.0 | SSU1       | complemer Sulfite sensitivity prote orf19.7313  | 5976 CaERG13    | Lipid fatty-:transferase activity                                                                          |
| CA5551 | 0.8 | 0.6 | 1.1 | IPF5972    | 16565046..putative cysteine dioxy orf19.7314    | 5972 CaSSU1     | CELL RES transporter activity                                                                              |
| CA5552 | 1.0 | 0.9 | 1.1 | IPF5971    | complemer unknown function orf19.7316           | 5971 IPF5972    | No significant S.c. match                                                                                  |
| CA5553 | 1.1 | 1.0 | 1.1 | IPF1960.3f | complemer putative transcriptional orf19.7317   | 5969 IPF5971    | No significant S.c. match                                                                                  |
| CA5554 | 1.0 | 0.9 | 1.0 | IPF1960.5f | complemer putative transcriptional orf19.7318   | 1960 IPF1960.3f | Nitrogen and sulphur metabolism TRANSCRIPTION SUBCELLULAR LOCALISATION                                     |
| CA5555 | 1.0 | 0.9 | 1.0 | SUC1       | 16568981..Putative zinc finger prc orf19.7319   | 1962 IPF1960.5f | TRANSCRIPTION SUBCELLULAR LOCALISATION                                                                     |
| CA5556 | 0.9 | 0.9 | 0.9 | LIP7       | complemer Secretory lipase orf19.7320           | 1964 CaSUC1     | C-compour DNA binding                                                                                      |
| CA5557 | 0.9 | 0.9 | 0.9 | IPF1968    | complemer unknown function orf19.7321           | 1968 CaLIP7     | Other virulence attributes                                                                                 |
| CA5558 | 0.8 | 1.0 | 1.0 | IPF1969    | complemer unknown function orf19.7322           | 1969 IPF1968    | UNCLASSI molecular_function unknown                                                                        |
| CA5559 | 1.1 | 1.2 | 0.9 | CBP1       | complemer Corticosteroid binding orf19.7323     | 1971 IPF1969    | UNCLASSI molecular_function unknown                                                                        |
| CA5560 | 1.0 | 1.1 | 1.1 | THI13      | 16579519..Pyrimidine precursor b orf19.7324     | 1974 CaCBP1     | Metabolism of vitamins cofactors and prosthetic groups                                                     |
| CA5561 | 1.2 | 1.1 | 1.0 | SCO1       | complemer inner mitochondrial me orf19.7325     | 1975 CaTHI13    | Nucleotide molecular_function unknown                                                                      |
| CA5562 |     |     |     | IPF1977    | 16582043..16583782                              | CaSCO1          | PROTEIN I molecular_function unknown                                                                       |
| CA5563 | 1.0 | 1.0 | 1.0 | PHO88      | complemer Involved in phosphate orf19.7327      | 1978            |                                                                                                            |
| CA5564 | 1.0 | 1.1 | 1.0 | IPF1980    | complemer unknown function orf19.7328           | 1980 CaPHO88    | Phosphate transporter activity                                                                             |
| CA5565 | 0.9 | 0.9 | 0.9 | QR18       | 16588317..E2 ubiquitin-conjugatio orf19.7329    | 1981 IPF1980    | No significant S.c. match                                                                                  |
| CA5566 | 1.0 | 0.9 | 1.0 | PET18      | complemer Putative transcriptional orf19.7330   | 1983 CaQR18     | PROTEIN I ligase activity                                                                                  |
| CA5567 | 0.9 | 0.8 | 1.0 | FCY24      | 16590399..Putative purine-cytosin orf19.7331    | 1985 CaPET18    | TRANSCR molecular_function unknown                                                                         |
| CA5568 | 0.9 | 1.0 | 1.0 | ELF1       | 16592349..Elongation-like factor orf19.7332     | 1989 CaFCY24    | Nucleotide metabolism TRANSPORT FACILITATION                                                               |
| CA5569 | 1.1 | 1.1 | 1.2 | PRE8       | 16596456..20S proteasome subur orf19.7335       | 1990 CaELF1     | PROTEIN I :transporter activity,hydrolase activity                                                         |
| CA5570 | 1.0 | 0.9 | 1.0 | IPF1992    | complemer putative MFS transport orf19.7336     | 1992 CaPRE8     | PROTEIN I peptidase activity                                                                               |
| CA5571 | 1.0 | 1.0 | 1.0 | IPF2001    | 16607554..unknown function orf19.7337           | 2001 IPF1992    | CELL RESCUE DEFENSE AND VIRULENCE ""TRANSPORT FACILITATION                                                 |
| CA5572 | 1.1 | 0.9 | 1.1 | BGL22      | complemer endo-beta-1,3-glucana orf19.7339      | 2004 IPF2001    | No significant S.c. match                                                                                  |
| CA5573 | 1.1 | 1.0 | 1.0 | IPF2005    | complemer unknown function                      | 2005 CaBGL22    | No significant S.c. match                                                                                  |
| CA5574 | 1.2 | 1.1 | 1.1 | IPF2007    | complemer unknown function orf19.7341           | 2007 IPF2005    | No significant S.c. match                                                                                  |
| CA5575 | 0.6 | 0.6 | 0.7 | IPF19813   | 16624459..unknown function orf19.7342           | 19813 IPF2007   | No significant S.c. match                                                                                  |
| CA5576 | 0.9 | 0.9 | 0.8 | PRP4       | 16629096..pre-mRNA-processing orf19.7343        | 12538 IPF19813  | PROTEIN FATE [folding modification destination] ""CELL FATE                                                |
| CA5577 | 1.0 | 1.0 | 1.0 | IPF12537   | 16630917..unknown function orf19.7344           | 12537 CaPRP4    | TRANSCR RNA binding                                                                                        |
| CA5578 | 1.0 | 1.0 | 1.0 | IPF12536   | complemer unknown function orf19.7345           | 12536 IPF12537  | UNCLASSI molecular_function unknown                                                                        |
| CA5579 | 0.9 | 0.9 | 0.9 | IPF5661    | complemer unknown function orf19.7125           | 5661 IPF12536   | UNCLASSI molecular_function unknown                                                                        |
| CA5580 | 1.4 | 1.5 | 1.1 | RVS161     | complemer cytoskeletal binding pr orf19.7124    | 5657 IPF5661    | No significant S.c. match                                                                                  |
| CA5581 | 1.2 | 0.9 | 1.1 | RAD3       | complemer DNA helicase/ATPase orf19.7119        | 5649 CaRVS161   | CELLULAF protein binding                                                                                   |
| CA5582 | 1.2 | 1.2 | 1.0 | ADK2       | complemer adenylate kinase, mito orf19.7118     | 5646 CaRAD3     | CELL CYC DNA binding,helicase activity                                                                     |
| CA5583 | 1.0 | 1.0 | 0.9 | IPF5644    | complemer unknown function orf19.7116           | 5644 CaADK2     | Nucleotide transferase activity                                                                            |
| CA5584 | 1.2 | 1.2 | 1.1 | SAC7       | complemer GAP for RHO1 by hom orf19.7115        | 5642 IPF5644    | PROTEIN I transcription regulator activity                                                                 |
| CA5585 | 0.8 | 1.2 | 0.6 | CSA1       | complemer mycelial surface antige orf19.7114    | 5641 CaSAC7     | PROTEIN I signal transducer activity                                                                       |
| CA5586 | 0.2 | 0.3 | 0.2 | IPF5625    | 16649726..unknown function orf19.7112           | 5625 CaCSA1     | No significant S.c. match                                                                                  |
| CA5588 | 6.1 | 4.9 | 3.3 | SOD22.3F   | 16651661..superoxide dismutase, 3-prime en      | 5622 IPF5625    | REGULATION OF/INTERACTION WITH CELLULAR ENVIRONMENT Other virulence attributes                             |
| CA5589 | 1.6 | 1.1 | 1.6 | IPF5621    | 16652423..unknown function orf19.7111           | 5621 CaSOD22.   | CELL RESCUE DEFENSE AND VIRULENCE ""SUBCELLULAR LOCALISATION                                               |
| CA5590 | 1.0 | 1.1 | 1.0 | TAD1       | 16652934..Double-stranded ma s orf19.7110       | 5619 IPF5621    | CONTROL molecular_function unknown                                                                         |
| CA5591 | 1.2 | 1.1 | 1.2 | IPF5618    | complemer unknown function orf19.7109           | 5618 CaTAD1     | TRANSCR hydrolase activity                                                                                 |
| CA5593 | 1.3 | 1.3 | 1.1 | IPF5615    | 16654858..unknown function orf19.7107           | 5615 IPF5618    | UNCLASSI molecular_function unknown                                                                        |
| CA5594 | 1.0 | 0.9 | 1.0 | IPF19814   | 16656751..folate hydrolase (by ho orf19.7106    | 19814 IPF5615   | UNCLASSI molecular_function unknown                                                                        |
| CA5595 | 1.0 | 1.0 | 1.0 | IPF568     | 16659215..similar to Saccharomy orf19.7105      | 568 IPF19814    | REGULATI molecular_function unknown                                                                        |
| CA5596 | 1.1 | 1.0 | 1.0 | IPF564     | 16661741..unknown function orf19.7104           | 564 IPF568      | CELL CYC enzyme regulator activity                                                                         |
| CA5597 | 1.0 | 1.0 | 1.1 | IPF563     | 16662817..unknown function orf19.7103           | 563 IPF564      | No significant S.c. match                                                                                  |
| CA5598 | 1.1 | 1.1 | 1.1 | IPF562     | complemer unknown function orf19.7101           | 562 IPF563      | UNCLASSI molecular_function unknown                                                                        |
| CA5599 | 1.1 | 1.0 | 1.1 | IPF560     | 16666230..unknown function orf19.7102           | 560 IPF562      | SUBCELL DNA binding                                                                                        |
| CA5600 | 1.0 | 1.1 | 1.0 | IPF559     | 16667458..unknown function orf19.7100           | 559 IPF560      | UNCLASSIFIED PROTEINS                                                                                      |
| CA5601 | 0.9 | 0.9 | 1.0 | IPF556     | 16669489..transcriptional regulato orf19.7098   | 556 IPF559      | TRANSPO transporter activity                                                                               |
| CA5602 | 1.0 | 1.0 | 1.0 | IPF554     | complemer RNA binding protein (b orf19.7097     | 554 IPF556      | TRANSCR molecular_function unknown                                                                         |
| CA5603 | 1.0 | 1.0 | 1.0 | IPF553     | complemer unknown function orf19.7096           | 553 IPF554      | TRANSCRIPTION                                                                                              |
| CA5604 | 0.9 | 1.0 | 1.0 | IPF549     | 16674186..unknown function orf19.7095           | 549 IPF553      | UNCLASSI molecular_function unknown                                                                        |
| CA5605 | 1.0 | 0.9 | 0.9 | SNF31      | 16677266..high-affinity glucose tr: orf19.7094  | 546 IPF549      | UNCLASSI molecular_function unknown                                                                        |
| CA5606 | 1.0 | 1.0 | 1.0 | STL2.3F    | complemer sugar transporter, 3-prime end (by    | 542 CaSNF31     | C-compound and carbohydrate metabolism CELLULAR TRANSPORT AND TRANSPORT MECHANISMS REGULATION OF/INTERACTI |
| CA5607 | 1.1 | 1.0 | 1.0 | STL2.5F    | complemer sugar transporter, 5-pr orf19.7093    | 541 CaSTL2.3f   | C-compound and carbohydrate metabolism SUBCELLULAR LOCALISATION TRANSPORT FACILITATION                     |
| CA5608 | 1.1 | 1.2 | 1.0 | IPF539     | 16681988..unknown function orf19.7092           | 539 CaSTL2.5f   | C-compound and carbohydrate metabolism SUBCELLULAR LOCALISATION TRANSPORT FACILITATION                     |
| CA5609 | 0.9 | 1.0 | 1.1 | IPF538     | complemer unknown function orf19.7091           | 538 IPF539      | UNCLASSI molecular_function unknown                                                                        |
| CA5610 | 0.9 | 1.0 | 0.9 | PMR1       | complemer calcium/mangenease F orf19.7089       | 534 IPF538      | No significant S.c. match                                                                                  |
| CA5611 | 1.0 | 1.0 | 1.1 | SUA5       | complemer translation initiation prc orf19.7088 | 529 CaPMR1      | CELLULAF transporter activity                                                                              |
| CA5612 | 1.2 | 1.1 | 1.1 | KAP114     | complemer putative RAN-binding f orf19.7086     | 527 CaSUA5      | PROTEIN I :molecular_function unknown                                                                      |
| CA5613 | 1.5 | 2.1 | 1.2 | IPF525     | complemer unknown function orf19.7085           | 525 CaKAP114    | PROTEIN I protein binding                                                                                  |
| CA5614 | 1.1 | 2.1 | 1.3 | IPF522     | 16694750..unknown function orf19.7084           | 522 IPF525      | No significant S.c. match                                                                                  |
| CA5615 | 1.1 | 1.0 | 1.0 | IPF520     | 16695958..unknown function orf19.7083           | 520 IPF522      | No significant S.c. match                                                                                  |

|        |     |     |     |           |                                    |                |       |           |                                                                                                                  |
|--------|-----|-----|-----|-----------|------------------------------------|----------------|-------|-----------|------------------------------------------------------------------------------------------------------------------|
| CA5616 | 1.1 | 1.1 | 1.2 | PET8      | 16697116..mitochondrial carrier p  | orf19.7082     | 519   | IPF520    | CELL CYC molecular_function unknown                                                                              |
| CA5617 | 1.1 | 1.1 | 1.0 | SPL1      | 16698157..rRNA splicing protein    | orf19.7081     | 518   | CaPET8    | CELLULAF transporter activity                                                                                    |
| CA5618 | 0.9 | 0.9 | 1.1 | LEU2      | 16699837..isopropyl malate dehyd   | orf19.7080     | 516   | CaSPL1    | REGULATIllyase activity                                                                                          |
| CA5619 | 1.0 | 1.1 | 1.0 | IPF514    | complemer similar to Saccharomy    | orf19.7079     | 514   | CaLEU2    | Amino acid oxidoreductase activity                                                                               |
| CA5620 | 1.0 | 0.9 | 1.0 | IPF511    | complemer unknown function         | orf19.7078     | 511   | IPF514    | CELL FATImolecular_function unknown                                                                              |
| CA5621 | 0.9 | 0.8 | 1.2 | FRE7      | 16706280..Ferric reductase trans   | orf19.7077     | 507   | IPF511    | No significant S.c. match                                                                                        |
| CA5622 | 1.0 | 1.0 | 0.9 | GBP2.3    | complemer single-strand telomeric  | orf19.7076     | 506   | CaFRE7    | REGULATIoxidoreductase activity                                                                                  |
| CA5623 | 0.9 | 0.9 | 1.0 | IPF502    | complemer unknown function         | orf19.7074     | 502   | CaGBP2.3  | PROTEIN IRNA binding                                                                                             |
| CA5624 | 1.0 | 0.9 | 1.1 | IPF501    | 16711299..unknown function         | orf19.7073     | 501   | IPF502    | UNCLASSImolecular_function unknown                                                                               |
| CA5625 | 1.0 | 1.0 | 1.0 | PEL1      | complemer CDP-diaclyglycerol-ser   | orf19.7072     | 499   | IPF501    | UNCLASSIFIED PROTEINS                                                                                            |
| CA5626 | 1.0 | 1.0 | 1.0 | IPF498    | 16715125..unknown function         | orf19.7071     | 498   | CaPEL1    | Lipid fatty-ε transferase activity                                                                               |
| CA5627 | 0.9 | 1.1 | 1.0 | IPF495    | complemer unknown function         | orf19.7069     | 495   | IPF498    | Phosphate metabolism CELLULAR TRANSPORT AND TRANSPORT MECHANISMS REGULATION OF/INTERACTION WITH CELLULAF         |
| CA5628 | 1.0 | 0.9 | 1.0 | MAC1      | 16718263..putative metal-binding   | orf19.7068     | 492   | IPF495    | UNCLASSItransferase activity                                                                                     |
| CA5629 | 1.0 | 1.0 | 1.0 | CTR9      | 16719856..required for G1 cyclin   | orf19.7067     | 489   | CaMAC1    | TRANSCRIPTION                                                                                                    |
| CA5630 | 1.0 | 1.0 | 1.0 | IPF486    | complemer unknown function         | orf19.7065     | 486   | CaCTR9    | CELL CYC DNA binding                                                                                             |
| CA5631 | 0.8 | 0.9 | 0.6 | GLN4      | complemer glutaminyI-trNA synth    | orf19.7064     | 485   | IPF486    | UNCLASSIDNA binding                                                                                              |
| CA5632 | 1.2 | 1.2 | 1.1 | IPF480    | complemer unknown function         | orf19.7063     | 480   | CaGLN4    | PROTEIN iligase activity                                                                                         |
| CA5633 | 1.1 | 1.2 | 1.0 | RPA135    | 16727850..DNA-directed RNA pol     | orf19.7062     | 479   | IPF480    | UNCLASSImolecular_function unknown                                                                               |
| CA5634 | 0.9 | 1.0 | 1.0 | IPF477    | complemer unknown function         | orf19.7061     | 477   | CaRPA135  | TRANSCR nucleotidyltransferase activity                                                                          |
| CA5635 | 1.0 | 0.9 | 1.0 | IPF474    | 16732607..unknown Function         | orf19.7060     | 474   | IPF477    | UNCLASSImolecular_function unknown                                                                               |
| CA5636 | 0.7 | 0.5 | 0.9 | IPF473    | complemer unknown Function         | orf19.7059     | 473   | IPF474    | No significant S.c. match                                                                                        |
| CA5637 | 0.9 | 0.9 | 0.8 | IPF472    | complemer unknown Function         | orf19.7058     | 472   | IPF473    | UNCLASSImolecular_function unknown                                                                               |
| CA5638 | 1.0 | 1.0 | 1.0 | IPF470    | 16737308..putative glutamine-tRN   | orf19.7057     | 470   | IPF472    | UNCLASSImolecular_function unknown                                                                               |
| CA5639 | 0.9 | 1.1 | 1.0 | DIP53.EXC | complemer dicarboxylic amino acic  | orf19.7056     | 469   | IPF470    | PROTEIN ittransferase activity                                                                                   |
| CA5641 | 2.3 | 2.2 | 1.5 | GAC1      | complemer ser/thr phosphoprotein   | orf19.7053     | 461   | CaDIP53.e | No significant S.c. match                                                                                        |
| CA5642 | 1.1 | 1.0 | 1.0 | INP52     | complemer phosphatidylinositol ph  | orf19.7052     | 451   | CaGAC1    | C-compour protein phosphatase activity                                                                           |
| CA5643 | 1.0 | 1.0 | 1.0 | IPF448    | 16762240..unknown function         | orf19.7051     | 448   | CaINP52   | Lipid fatty-ε hydrolase activity                                                                                 |
| CA5644 | 0.9 | 0.9 | 0.9 | IPF447    | 16763058..unknown function         | orf19.7050     | 447   | IPF448    | UNCLASSImolecular_function unknown                                                                               |
| CA5645 | 0.8 | 1.0 | 0.8 | CYB5      | 16764907..Cytochrome b5 (by hor    | orf19.7049     | 443   | IPF447    | UNCLASSImolecular_function unknown                                                                               |
| CA5646 | 1.1 | 1.0 | 1.1 | RPS28B.3  | 16767339..Ribosomal protein S28B   | (S33B) (l      | 440   | CaCYB5    | Lipid fatty-ε transporter activity                                                                               |
| CA5647 | 1.0 | 1.0 | 1.0 | RTF1.5EO  | 16768246..Nuclear protein regulat  | ing DNA bir    | 439   | CaRPS28E  | UNCLASSIstructural molecule activity                                                                             |
| CA5648 | 1.1 | 1.1 | 1.0 | UBC6      | 16770989..E2 ubiquitin-conjugat    | ing orf19.7347 | 7116  | CaRTF1.5e | TRANSCRIPTION SUBCELLULAR LOCALISATION                                                                           |
| CA5649 | 0.9 | 1.1 | 1.1 | CHS4      | 16776234..Chitin synthase regulat  | ing orf19.7349 | 7112  | CaUBC6    | PROTEIN FATE [folding modification destination] ""CELL FATE SUBCELLULAR LOCALISATION                             |
| CA5650 | 1.3 | 2.4 | 1.4 | IPF7109   | 16780282..unknown function         | orf19.7350     | 7109  | CaCHS4    | C-compour enzyme regulator activity                                                                              |
| CA5651 | 1.1 | 1.1 | 1.0 | KIP3      | complemer Kinesin-related protein  | orf19.7353     | 7105  | IPF7109   | UNCLASSImolecular_function unknown                                                                               |
| CA5652 | 0.9 | 0.9 | 1.1 | IPF19815  | complemer longevity-assurance pr   | orf19.7354     | 19815 | CaKIP3    | CELL CYC motor activity                                                                                          |
| CA5653 | 1.0 | 1.0 | 0.9 | SSN8      | complemer C-type cyclin associate  | orf19.7355     | 15544 | IPF19815  | CELL FATE                                                                                                        |
| CA5654 | 0.9 | 1.0 | 1.0 | IPF15543  | complemer unknown function         | orf19.7356     | 15543 | CaSSN8    | C-compour transcription regulator activity                                                                       |
| CA5655 | 1.0 | 0.9 | 1.0 | IPF18080  | 16791138..unknown function         | orf19.7357     | 18080 | IPF15543  | No significant S.c. match                                                                                        |
| CA5656 | 1.1 | 1.1 | 1.0 | IPF14683  | complemer unknown function         | orf19.7358     | 14683 | IPF18080  | UNCLASSIligase activity                                                                                          |
| CA5657 | 1.0 | 1.0 | 1.1 | IPF14682  | complemer putative transcription f | orf19.7359     | 14682 | IPF14683  | UNCLASSImolecular_function unknown                                                                               |
| CA5658 | 1.0 | 1.1 | 1.0 | IPF1242   | complemer unknown function         | orf19.7360     | 1242  | IPF14682  | TRANSCR DNA binding,transcription regulator activity                                                             |
| CA5659 | 1.0 | 1.0 | 0.9 | SEN54     | 16799988..rRNA splicing endonuc    | orf19.7361     | 1243  | IPF1242   | UNCLASSImolecular_function unknown                                                                               |
| CA5660 | 1.1 | 1.0 | 1.0 | SKN1.3    | complemer Glucan synthase subui    | orf19.7362     | 1245  | CaSEN54   | TRANSCR RNA binding                                                                                              |
| CA5661 | 1.0 | 1.1 | 1.0 | KRE6      | 16807297..Glucan synthase subui    | orf19.7363     | 1249  | CaSKN1.3  | C-compound and carbohydrate metabolism CELL FATE CONTROL OF CELLULAR ORGANIZATION SUBCELLULAR LOCALISATION       |
| CA5662 | 1.0 | 1.0 | 1.1 | IPF1250   | 16811045..Flavin-containing monc   | orf19.7364     | 1250  | CaKRE6    | C-compour hydrolase activity                                                                                     |
| CA5663 | 1.0 | 1.1 | 1.0 | IPF1251   | 16813355..unknown function         | orf19.7365     | 1251  | IPF1250   | Nitrogen and sulphur metabolism                                                                                  |
| CA5664 | 1.1 | 1.0 | 1.0 | IPF1252   | complemer Conserved hypothetica    | orf19.7366     | 1252  | IPF1251   | UNCLASSImolecular_function unknown                                                                               |
| CA5665 | 0.8 | 0.6 | 1.0 | UBP1      | complemer Ubiquitin-specific prote | orf19.7367     | 1255  | IPF1252   | UNCLASSImolecular_function unknown                                                                               |
| CA5666 | 1.2 | 1.0 | 1.2 | PUB1      | complemer Major polyadenylated f   | orf19.7368     | 1257  | CaUBP1    | PROTEIN lpeptidase activity                                                                                      |
| CA5667 | 0.9 | 0.8 | 1.0 | IPF1259   | 16823061..Conserved hypothetica    | orf19.7369     | 1259  | CaPUB1    | TRANSCRIPTION SUBCELLULAR LOCALISATION                                                                           |
| CA5668 | 0.9 | 0.8 | 1.0 | IPF1261   | 16824896..unknown function         | orf19.7370     | 1261  | IPF1259   | UNCLASSItransferase activity                                                                                     |
| CA5669 | 1.0 | 1.0 | 1.0 | IPF1264   | 16826657..unknown function, Asn    | orf19.7371     | 1264  | IPF1261   | UNCLASSImolecular_function unknown                                                                               |
| CA5670 | 1.0 | 0.9 | 1.1 | IPF1266   | 16830467..Probable transcription   | orf19.7372     | 1266  | IPF1264   | TRANSCRIPTION SUBCELLULAR LOCALISATION                                                                           |
| CA5671 | 0.8 | 0.9 | 0.7 | CTA4      | 16835029..Probable transcription   | orf19.7374     | 1269  | IPF1266   | Lipid fatty-acid and isoprenoid metabolism ""TRANSCRIPTION SUBCELLULAR LOCALISATION                              |
| CA5672 | 0.9 | 0.9 | 0.8 | IPF1271   | complemer Small nuclear ribonuck   | orf19.7375     | 1271  | CaCTA4    | Lipid fatty-ε DNA binding                                                                                        |
| CA5673 | 0.9 | 0.8 | 0.9 | IPF1272   | 16838990..unknown function         | orf19.7376     | 1272  | IPF1271   | TRANSCRIPTION ""PROTEIN FATE [folding modification destination] ""                                               |
| CA5674 | 0.9 | 0.9 | 0.9 | IPF1274   | 16841646..similar to Saccharomy    | orf19.7377     | 1274  | IPF1272   | TRANSCRIPTION                                                                                                    |
| CA5675 | 1.1 | 1.1 | 1.1 | SIS2      | complemer Involved in cell cycle-s | orf19.7378     | 1276  | IPF1274   | CELL CYC protein binding                                                                                         |
| CA5676 | 0.9 | 0.9 | 0.9 | FAA22     | complemer Long-chain-fatty-acid-   | orf19.7379     | 1278  | CaSIS2    | CELL CYC lyase activity,enzyme regulator activity                                                                |
| CA5677 | 1.1 | 1.0 | 1.1 | IPF1286   | complemer unknown function         | orf19.7380     | 1286  | CaFAA22   | Lipid fatty-acid and isoprenoid metabolism ""CELLULAR TRANSPORT AND TRANSPORT MECHANISMS SUBCELLULAR LOCALISATIC |
| CA5678 | 1.0 | 1.0 | 1.0 | IPF1292   | 16863716..unknown function Hypr    | orf19.7381     | 1292  | IPF1286   | No significant S.c. match                                                                                        |
| CA5680 | 0.9 | 1.2 | 1.1 | CAM1.EXC  | 16867852..translation elongation   | orf19.7382     | 1299  | IPF1292   | Amino acid metabolism Nitrogen and sulphur metabolism TRANSCRIPTION SUBCELLULAR LOCALISATION                     |
| CA5681 | 0.8 | 0.9 | 0.9 | MNN9      | 16869877..Required for complex l   | orf19.7383     | 1301  | CaCAM1.e  | PROTEIN SYNTHESIS SUBCELLULAR LOCALISATION                                                                       |
| CA5682 | 0.9 | 0.8 | 0.9 | NOG1      | 16871390..Nucleolar G-protein (b)  | orf19.7384     | 1302  | CaMNN9    | C-compour transferase activity                                                                                   |
| CA5683 | 1.0 | 1.0 | 1.0 | IPF3333   | 16874917..unknown function         | orf19.7385     | 3333  | CaNOG1    | UNCLASSIhydrolase activity                                                                                       |
| CA5684 | 1.1 | 1.0 | 0.9 | IPF3331   | complemer unknown function         | orf19.7386     | 3331  | IPF3333   | UNCLASSImolecular_function unknown                                                                               |
| CA5685 | 1.0 | 1.0 | 0.9 | HPA1      | 16877752..RNA polymerase II-ass    | orf19.7387     | 3330  | IPF3331   | ENERGY " molecular_function unknown                                                                              |
| CA5686 | 1.0 | 1.0 | 1.1 | IPF3329   | complemer similar to Saccharomy    | orf19.7388     | 3329  | CaHPA1    | CELL CYC transcription regulator activity                                                                        |
| CA5687 | 1.0 | 1.1 | 1.0 | REV3.5F   | 16881763..DNA-directed DNA pol     | orf19.7389     | 3327  | IPF3329   | C-compour protein kinase activity                                                                                |
| CA5689 | 1.0 | 1.0 | 1.0 | REV3.3F   | 16885545..DNA-directed DNA pol     | orf19.7390     | 3325  | CaREV3.5f | CELL CYC nucleotidyltransferase activity                                                                         |
| CA5690 | 1.0 | 0.9 | 0.9 | OCH1      | complemer Alpha-1,6-mannosyltra    | orf19.7391     | 3324  | CaREV3.3f | CELL CYCLE AND DNA PROCESSING SUBCELLULAR LOCALISATION                                                           |

|        |     |     |     |             |                                                  |            |       |             |                                                                                                                  |
|--------|-----|-----|-----|-------------|--------------------------------------------------|------------|-------|-------------|------------------------------------------------------------------------------------------------------------------|
| CA5691 | 1.0 | 1.3 | 1.1 | DED1        | complemer RNA helicase (by hom                   | orf19.7392 | 3320  | CaOCH1      | C-compour transferase activity                                                                                   |
| CA5692 | 1.1 | 0.9 | 1.0 | UTR1        | complemer Associated with ferric r               | orf19.7393 | 3316  | CaDED1      | TRANSCR RNA binding                                                                                              |
| CA5693 | 1.0 | 1.0 | 1.0 | GDA1        | complemer Gogli guanosine diphos                 | orf19.7394 | 3313  | CaUTR1      | REGULATItransferase activity                                                                                     |
| CA5694 | 0.9 | 0.7 | 0.9 | IPF3311     | 16898207..unknown function                       | orf19.7396 | 3311  | CaGDA1      | PROTEIN Hydrolase activity                                                                                       |
| CA5695 | 0.9 | 1.1 | 0.9 | IPF3310     | 16900279..unknown function                       | orf19.7397 | 3310  | IPF3311     | No significant S.c. match                                                                                        |
| CA5696 | 1.0 | 0.9 | 0.9 | IPF3309.3f  | complemer unknown function, 3-pr                 | orf19.7398 | 3309  | IPF3310     | UNCLASSImolecular_function unknown                                                                               |
| CA5697 | 1.2 | 1.6 | 1.2 | IPF18076.3c | complemer thiol-specific antioxidant-like protei |            | 18076 | IPF3309.3c  | UNCLASSIFIED PROTEINS                                                                                            |
| CA5699 | 1.0 | 1.1 | 1.0 | ALS7        | complemer agglutinin-like protein                | orf19.7400 | 19816 | IPF18076.3c | CELL RESCUE DEFENSE AND VIRULENCE ""SUBCELLULAR LOCALISATION                                                     |
| CA5700 | 1.0 | 0.9 | 1.0 | IPF2630     | 16916566..unknown function                       |            | 2630  | CaALS7      | SUBCELLULAR LOCALISATION Other virulence attributes                                                              |
| CA5701 | 1.0 | 1.1 | 1.0 | ISW2        | 16917025..Chromatin remodeling                   | orf19.7401 | 2633  | IPF2630     | No significant S.c. match                                                                                        |
| CA5702 | 0.9 | 0.9 | 0.9 | PCH1        | complemer Putative ATPase (by h                  | orf19.7402 | 2639  | CaISW2      | TRANSCR hydrolase activity                                                                                       |
| CA5703 | 0.7 | 0.6 | 0.8 | IPF2463     | complemer unknown function                       | orf19.7403 | 2643  | CaPCH1      | CELL CYC transferase activity                                                                                    |
| CA5704 | 1.1 | 0.9 | 1.0 | CHA11       | complemer L-serine/L-threonine de                | orf19.7404 | 2644  | IPF2463     | UNCLASSImolecular_function unknown                                                                               |
| CA5705 | 1.0 | 0.8 | 1.0 | IPF2645     | 16929431..unknown function                       | orf19.7405 | 2645  | CaCHA11     | Amino acid lyase activity                                                                                        |
| CA5706 | 0.9 | 1.0 | 1.0 | IPF2649     | 16930675..unknown function                       | orf19.7406 | 2649  | IPF2645     | No significant S.c. match                                                                                        |
| CA5707 | 1.1 | 0.9 | 1.5 | ERV25       | complemer Component of COPII-c                   | orf19.7409 | 2651  | IPF2649     | REGULATION OF/INTERACTION WITH CELLULAR ENVIRONMENT Other virulence attributes                                   |
| CA5708 | 0.3 | 0.1 | 1.0 | MRPL39      | 16933753..Mitochondrial 60S ribosomal prote      |            | 2652  | CaERV25     | CELLULAF molecular_function unknown                                                                              |
| CA5709 | 1.0 | 1.0 | 1.1 | IPF2653     | complemer unknown function                       | orf19.7410 | 2653  | CaMRPL39    | PROTEIN 'structural molecule activity                                                                            |
| CA5710 | 0.8 | 0.8 | 1.1 | OAC1        | 16937716..Mitochondrial oxaloace                 | orf19.7411 | 2654  | IPF2653     | UNCLASSImolecular_function unknown                                                                               |
| CA5711 | 1.0 | 0.9 | 1.0 | MUB1        | 16939227..Regulation of bud site                 | orf19.7412 | 2656  | CaOAC1      | CELLULAF transporter activity                                                                                    |
| CA5712 | 1.1 | 1.1 | 1.0 | IPF2657     | 16941769..unknown function                       | orf19.7413 | 2657  | CaMUB1      | CELL FATImolecular_function unknown                                                                              |
| CA5713 | 1.0 | 0.9 | 1.0 | ALS6        | 16946732..agglutinin-like protein                | orf19.7414 | 2663  | IPF2657     | CELL CYC molecular_function unknown                                                                              |
| CA5714 | 5.0 | 2.9 | 4.1 | IPF2431     | 16952072..similar to Saccharomy                  | orf19.7417 | 2431  | CaALS6      | CELL FATE SUBCELLULAR LOCALISATION Other virulence attributes                                                    |
| CA5715 | 0.9 | 1.0 | 1.2 | HNT2        | 16952914..Diadenosine polyphos                   | orf19.7419 | 2434  | IPF2431     | CELL RES oxidoreductase activity                                                                                 |
| CA5716 | 1.0 | 1.1 | 1.1 | MED6        | 16953576..RNA polymerase II tra                  | orf19.7420 | 2436  | CaHNT2      | Nucleotide hydrolase activity                                                                                    |
| CA5717 | 1.4 | 1.6 | 1.3 | CYP51       | complemer Cyclophilin - peptidylpr               | orf19.7421 | 2438  | CaMED6      | TRANSCR transcription regulator activity                                                                         |
| CA5718 | 1.0 | 1.0 | 0.9 | LCP5        | complemer Ngg1p interacting prot                 | orf19.7422 | 2440  | CaCYP51     | PROTEIN isomerase activity                                                                                       |
| CA5719 | 1.0 | 1.0 | 1.0 | IPF2441     | 16956623..unknown function                       | orf19.7424 | 2441  | CaLCP5      | TRANSCR RNA binding                                                                                              |
| CA5720 | 1.1 | 1.2 | 1.2 | UNG1        | complemer Uracil-DNA glycosylasi                 | orf19.7425 | 2442  | IPF2441     | UNCLASSImolecular_function unknown                                                                               |
| CA5721 | 1.0 | 0.9 | 1.1 | IPF2443     | complemer similar to Saccharomy                  | orf19.7426 | 2443  | CaUNG1      | CELL CYC DNA binding                                                                                             |
| CA5722 | 1.2 | 1.1 | 1.0 | IPF2446     | complemer unknown function                       | orf19.7427 | 2446  | IPF2443     | C-compour transferase activity                                                                                   |
| CA5723 | 1.3 | 1.0 | 1.3 | APN1        | 16962169..AP endonuclease, exo                   | orf19.7428 | 2448  | IPF2446     | UNCLASSImolecular_function unknown                                                                               |
| CA5724 | 1.2 | 1.2 | 1.0 | NUP116      | 16963243..nuclear pore protein (b                | orf19.7433 | 19817 | CaAPN1      | CELL CYC DNA binding                                                                                             |
| CA5725 | 1.0 | 1.0 | 1.1 | GLG2        | 16967618..Self-glucosylating initia              | orf19.7434 | 2460  | CaNUP116    | TRANSCR structural molecule activity                                                                             |
| CA5726 | 1.0 | 1.0 | 1.1 | AAF1        | 16976907..Adhesion and aggrega                   | orf19.7436 | 2468  | CaGLG2      | C-compound and carbohydrate metabolism ENERGY                                                                    |
| CA5727 | 1.0 | 0.9 | 0.9 | ECM15       | complemer Involved in cell wall biogenesis an    |            | 2469  | CaAAF1      | No significant S.c. match                                                                                        |
| CA5728 | 1.0 | 1.0 | 1.0 | IPF2471     | 16981597..maltose acetyltransfer                 | orf19.7437 | 2471  | CaECM15     | C-compour molecular_function unknown                                                                             |
| CA5729 | 1.1 | 1.1 | 1.1 | UBA1        | 16982761.. Ubiquitin-activating en               | orf19.7438 | 2475  | IPF2471     | C-compour transferase activity                                                                                   |
| CA5730 | 1.0 | 1.0 | 1.0 | HST6        | complemer ATP binding cassette $\zeta$           | orf19.7440 | 2479  | CaUBA1      | PROTEIN FATE [folding modification destination] """"CELL RESCUE DEFENSE AND VIRULENCE ""SUBCELLULAR LOCALISATION |
| CA5731 | 1.0 | 1.0 | 0.9 | IPF2870     | complemer unknown function                       | orf19.7441 | 2870  | CaHST6      | CELLULAF transporter activity,hydrolase activity                                                                 |
| CA5733 | 1.1 | 1.1 | 1.0 | IPF2873     | 16991767..unknown function                       | orf19.7443 | 2873  | IPF2870     | UNCLASSIFIED PROTEINS                                                                                            |
| CA5734 | 1.0 | 1.0 | 1.0 | IPF20029    | complemer unknown function                       | orf19.7444 | 20029 | IPF2873     | No significant S.c. match                                                                                        |
| CA5735 | 0.6 | 0.3 | 1.0 | IPF2878     | 16996010..unknown function                       | orf19.7445 | 2878  | IPF20029    | UNCLASSImolecular_function unknown                                                                               |
| CA5736 | 0.9 | 1.0 | 0.9 | OPI3        | complemer Methylene-fatty-acyl-pl                | orf19.7446 | 2880  | IPF2878     | PROTEIN Imolecular_function unknown                                                                              |
| CA5737 | 0.9 | 0.8 | 0.7 | JEN1        | 17001627..Carboxylic acid transp                 | orf19.7447 | 2882  | CaOPI3      | Lipid fatty- $\zeta$ transferase activity                                                                        |
| CA5738 | 0.9 | 1.0 | 1.1 | LYS9        | 17003715.. Lysine biosynthesis (b)               | orf19.7448 | 2883  | CaJEN1      | C-compour transporter activity                                                                                   |
| CA5739 | 1.0 | 0.9 | 0.9 | IPF2884     | complemer unknown function                       | orf19.7449 | 2884  | CaLYS9      | Amino acid oxidoreductase activity                                                                               |
| CA5740 | 1.1 | 1.0 | 1.0 | IPF20030    | 17007896..unknown function                       | orf19.7450 | 20030 | IPF2884     | UNCLASSImolecular_function unknown                                                                               |
| CA5741 | 1.0 | 1.0 | 1.0 | IPF2891     | 17010126..unknown function                       |            | 2891  | IPF20030    | UNCLASSImolecular_function unknown                                                                               |
| CA5742 | 0.9 | 0.8 | 1.0 | FUN31       | 17010633..Serine/threonine kinas                 | orf19.7451 | 2894  | IPF2891     | No significant S.c. match                                                                                        |
| CA5743 | 0.9 | 0.9 | 0.9 | IPF2895     | 17015039..unknown function                       | orf19.7452 | 2895  | CaFUN31     | UNCLASSIprotein kinase activity                                                                                  |
| CA5744 | 1.0 | 1.1 | 1.0 | IPF2898     | 17017475..unknown function                       | orf19.7453 | 2898  | IPF2895     | UNCLASSIDNA binding                                                                                              |
| CA5745 | 0.9 | 0.9 | 1.0 | TAF60       | complemer TATA-binding protein- $\zeta$          | orf19.7454 | 2900  | IPF2898     | No significant S.c. match                                                                                        |
| CA5746 | 0.9 | 0.9 | 1.1 | IPF2902     | complemer unknown function                       | orf19.7455 | 2902  | CaTAF60     | TRANSCR transcription regulator activity                                                                         |
| CA5747 | 1.0 | 1.0 | 1.0 | IPF2903     | complemer unknown function                       | orf19.7456 | 2903  | IPF2902     | UNCLASSIFIED PROTEINS                                                                                            |
| CA5748 | 1.1 | 0.9 | 1.0 | IPF2905     | complemer unknown function                       | orf19.7457 | 2905  | IPF2903     | No significant S.c. match                                                                                        |
| CA5749 | 0.8 | 1.1 | 1.0 | IPF2908     | complemer unknown function                       | orf19.7459 | 2908  | IPF2905     | No significant S.c. match                                                                                        |
| CA5750 | 1.1 | 1.1 | 1.0 | CHS21       | complemer Chitin synthase (by hom                | orf19.5384 | 11660 | IPF2908     | CELL CYC molecular_function unknown                                                                              |
| CA5751 | 1.0 | 0.9 | 0.9 | VPS8        | complemer Vacuolar sorting protei                | orf19.5387 | 11663 | CaCHS21     | C-compound and carbohydrate metabolism CELL CYCLE AND DNA PROCESSING CELL FATE SUBCELLULAR LOCALISATION          |
| CA5752 | 1.0 | 1.1 | 0.9 | IPF1055     | 17040426..unknown function                       | orf19.5388 | 1055  | CaVPS8      | PROTEIN Imolecular_function unknown                                                                              |
| CA5753 | 1.0 | 1.0 | 1.1 | FKH1        | 17043418.. Fork head protein type                | orf19.5389 | 1059  | IPF1055     | CELL CYC DNA binding,transcription regulator activity                                                            |
| CA5754 | 0.9 | 0.9 | 0.9 | IPF1060     | 17045114..unknown function, Asn                  | orf19.5390 | 1060  | CaFKH1      | TRANSCR DNA binding,transcription regulator activity                                                             |
| CA5755 | 1.0 | 1.0 | 1.0 | IPF1063     | complemer Spliceosomal protein S                 | orf19.5391 | 1063  | IPF1060     | No significant S.c. match                                                                                        |
| CA5756 | 0.6 | 0.6 | 0.9 | IPF1065     | complemer unknown function                       | orf19.5392 | 1065  | IPF1063     | TRANSCR RNA binding                                                                                              |
| CA5757 | 1.2 | 1.3 | 1.1 | IPF1067     | complemer Putative glutamate dec                 | orf19.5393 | 1067  | IPF1065     | CELL RESCUE DEFENSE AND VIRULENCE ""TRANSPORT FACILITATION                                                       |
| CA5758 | 0.9 | 0.9 | 0.9 | IPF1069     | complemer similar to Saccharomy                  | orf19.5395 | 1069  | IPF1067     | No significant S.c. match                                                                                        |
| CA5759 | 1.0 | 1.1 | 1.0 | PET191.3    | 17059892..Assembly of cytochrome oxidase,        |            | 1071  | IPF1069     | ENERGY molecular_function unknown                                                                                |
| CA5760 | 1.1 | 1.0 | 1.1 | IPF1072     | complemer unknown function                       | orf19.5397 | 1072  | CaPET191    | ENERGY " molecular_function unknown                                                                              |
| CA5761 | 1.0 | 1.1 | 1.0 | IFF11       | complemer unknown function                       | orf19.5399 | 1076  | IPF1072     | UNCLASSImolecular_function unknown                                                                               |
| CA5762 | 0.9 | 0.9 | 0.9 | IPF1084.3   | complemer unknown function, 3-pr                 | orf19.5401 | 1084  | CaIFF11     | No significant S.c. match                                                                                        |
| CA5763 | 0.9 | 0.9 | 0.8 | IFF10.5     | complemer unknown function, 5-pr                 | orf19.5404 | 1089  | IPF1084.3   | SUBCELLULAR LOCALISATION                                                                                         |
| CA5764 | 1.1 | 1.0 | 1.1 | IPF20031    | 17073688..similar to Saccharomy                  | orf19.5406 | 20031 | CaIFF10.5   | No significant S.c. match                                                                                        |

|        |     |     |     |            |                                              |       |            |                                                                                                                          |
|--------|-----|-----|-----|------------|----------------------------------------------|-------|------------|--------------------------------------------------------------------------------------------------------------------------|
| CA5765 | 0.9 | 0.9 | 0.9 | SOF1       | 17075690..Involved in 18S pre-rR orf19.5407  | 1095  | IPF20031   | PROTEIN lprotein phosphatase activity                                                                                    |
| CA5766 | 1.0 | 1.0 | 1.0 | IPF1097    | 17078448..serine/threonine protei orf19.5408 | 1097  | CaSOF1     | TRANSCR RNA binding                                                                                                      |
| CA5767 | 1.1 | 1.0 | 1.1 | IPF1098    | 17080829..unknown function orf19.5409        | 1098  | IPF1097    | UNCLASSIprotein kinase activity                                                                                          |
| CA5768 | 0.9 | 1.0 | 1.0 | PAC1       | 17082296..Similarity to human LI5orf19.5410  | 1099  | IPF1098    | UNCLASSImolecular_function unknown                                                                                       |
| CA5769 | 1.2 | 1.1 | 1.0 | UBC12      | complemer E2 ubiquitin-conjugatin orf19.5411 | 1101  | CaPAC1     | UNCLASSImolecular_function unknown                                                                                       |
| CA5770 | 1.0 | 1.1 | 1.1 | IPF1103    | complemer unknown function orf19.5412        | 1103  | CaUBC12    | PROTEIN FATE [folding modification destination]                                                                          |
| CA5771 | 1.0 | 1.0 | 1.1 | IPF1104    | 17085835..similar to Saccharomy orf19.5413   | 1104  | IPF1103    | CONTROL molecular_function unknown                                                                                       |
| CA5772 | 1.0 | 1.1 | 1.0 | ESA1       | complemer Histone acetyltransfera orf19.5416 | 1107  | IPF1104    | UNCLASSImolecular_function unknown                                                                                       |
| CA5773 | 0.8 | 1.1 | 0.8 | DOT5       | 17089881..Derepression of telom:orf19.5417   | 1111  | CaESA1     | CELL CYC transferase activity                                                                                            |
| CA5774 | 0.8 | 0.5 | 1.0 | IPF1113    | complemer unknown function orf19.5418        | 1113  | CaDOT5     | TRANSCR oxidoreductase activity                                                                                          |
| CA5775 | 1.5 | 1.5 | 1.0 | ATP5       | complemer F1F0-ATPase complex orf19.5419     | 1114  | IPF1113    | UNCLASSImolecular_function unknown                                                                                       |
| CA5776 | 1.1 | 1.1 | 1.0 | RML2       | 17093624..Ribosomal L2 protein, orf19.5420   | 1116  | CaATP5     | ENERGY Cstructural molecule activity                                                                                     |
| CA5777 | 1.1 | 1.1 | 1.0 | IPF1118    | complemer unknown function orf19.5422        | 1118  | CaRML2     | PROTEIN :structural molecule activity                                                                                    |
| CA5778 | 1.0 | 1.0 | 0.9 | IPF1119    | complemer unknown function orf19.5423        | 1119  | IPF1118    | No significant S.c. match                                                                                                |
| CA5779 | 1.0 | 1.0 | 1.0 | IPF1121    | complemer unknown function orf19.5425        | 1121  | IPF1119    | CELL CYC DNA binding,nucleotidyltransferase activity                                                                     |
| CA5780 | 1.0 | 1.0 | 1.0 | IPF1123    | 17099376..unknown function orf19.5426        | 1123  | IPF1121    | UNCLASSIRNA binding                                                                                                      |
| CA5781 | 1.0 | 0.9 | 1.0 | IPF1126    | complemer unknown function orf19.5428        | 1126  | IPF1123    | UNCLASSImolecular_function unknown                                                                                       |
| CA5782 | 0.9 | 0.9 | 1.1 | IPF1127    | 17103226..unknown function orf19.5429        | 1127  | IPF1126    | CELL RES transporter activity                                                                                            |
| CA5783 | 0.9 | 0.9 | 1.0 | IPF1128    | 17105376..unknown function orf19.5430        | 1128  | IPF1127    | UNCLASSImolecular_function unknown                                                                                       |
| CA5784 | 1.0 | 1.0 | 1.0 | IPF1129    | complemer unknown function orf19.5431        | 1129  | IPF1128    | No significant S.c. match                                                                                                |
| CA5785 | 1.0 | 1.0 | 1.0 | TPT1       | complemer tRNA 2 -phosphotransf orf19.5432   | 1133  | IPF1129    | No significant S.c. match                                                                                                |
| CA5786 | 0.9 | 1.0 | 1.1 | IPF1134    | complemer unknown function orf19.5433        | 1134  | CaTPT1     | TRANSCR transferase activity                                                                                             |
| CA5787 | 1.1 | 1.1 | 1.0 | IPF1136    | complemer unknown function orf19.5436        | 1136  | IPF1134    | UNCLASSImolecular_function unknown                                                                                       |
| CA5788 | 1.2 | 1.8 | 1.8 | RHR2       | complemer DL-glycerol phosphata orf19.5437   | 1139  | IPF1136    | UNCLASSIRNA binding                                                                                                      |
| CA5789 | 1.0 | 1.2 | 1.1 | IPF1143    | 17115378..Probable zinc-finger pr orf19.5438 | 1143  | CARHR2     | C-compour hydrolase activity                                                                                             |
| CA5790 | 1.0 | 1.0 | 1.0 | IPF1144    | complemer unknown function orf19.5439        | 1144  | IPF1143    | TRANSCR DNA binding                                                                                                      |
| CA5791 | 1.5 | 1.6 | 1.0 | RPT2       | complemer 26S proteasome reguli orf19.5440   | 4196  | IPF1144    | CELL CYCLE AND DNA PROCESSING SUBCELLULAR LOCALISATION                                                                   |
| CA5792 | 0.9 | 0.8 | 0.9 | IPF4195    | 17119905..similar to Saccharomy orf19.5441   | 4195  | CaRPT2     | No significc peptidase activity                                                                                          |
| CA5793 | 1.0 | 1.6 | 0.9 | IPF4192    | 17122664..unknown function orf19.5442        | 4192  | IPF4195    | CELL CYC peptidase activity                                                                                              |
| CA5794 | 0.9 | 0.8 | 1.1 | IPF4191    | 17124254..unknown function orf19.5443        | 4191  | IPF4192    | UNCLASSIFIED PROTEINS                                                                                                    |
| CA5795 | 1.0 | 1.0 | 1.0 | TIM44      | 17125726..mitochondrial inner me orf19.5444  | 4189  | IPF4191    | Amino acid oxidoreductase activity                                                                                       |
| CA5796 | 0.9 | 0.9 | 0.9 | GLO3       | 17127143..zinc finger protein orf19.5445     | 4185  | CaTIM44    | PROTEIN ltransporter activity                                                                                            |
| CA5797 | 1.0 | 1.2 | 1.1 | IPF4182    | 17128513..unknown function orf19.5446        | 4182  | CaGLO3     | CELL CYC enzyme regulator activity                                                                                       |
| CA5798 | 1.1 | 1.0 | 1.0 | IPF4181    | complemer putative permease (by orf19.5447   | 4181  | IPF4182    | No significant S.c. match                                                                                                |
| CA5799 | 1.0 | 0.9 | 1.0 | IPF4176    | 17131743..unknown function orf19.5449        | 4176  | IPF4181    | C-compound and carbohydrate metabolism ""Lipid fatty-acid and isoprenoid metabolism ""CELLULAR TRANSPORT AND TRANSPORT M |
| CA5800 | 1.0 | 1.0 | 0.9 | IPF4175    | 17132515..mitochondrial respirato orf19.5450 | 4175  | IPF4176    | UNCLASSIFIED PROTEINS                                                                                                    |
| CA5801 | 0.9 | 1.1 | 0.9 | DAL1       | 17133747..allantoinase orf19.5454            | 4171  | IPF4175    | TRANSCR oxidoreductase activity                                                                                          |
| CA5802 | 0.8 | 0.9 | 0.9 | IPF4164    | 17135626..similar to Saccharomy orf19.5455   | 4164  | CaDAL1     | Nitrogen ar hydrolase activity                                                                                           |
| CA5803 | 1.0 | 1.1 | 1.0 | IPF4163    | 17136031..unknown function orf19.5457        | 4163  | IPF4164    | CELL FATImolecular_function unknown                                                                                      |
| CA5804 | 0.8 | 0.8 | 0.8 | IPF4160    | 17137539..unknown function orf19.5459        | 4160  | IPF4163    | UNCLASSImolecular_function unknown                                                                                       |
| CA5805 | 1.1 | 1.1 | 1.0 | IPF4153    | 17139185..similar to Saccharomy orf19.5463   | 4153  | IPF4160    | SUBCELLLmolecular_function unknown                                                                                       |
| CA5806 | 0.9 | 1.0 | 0.9 | IPF4149    | complemer unknown function orf19.5465        | 4149  | IPF4153    | CELLULAF molecular_function unknown                                                                                      |
| CA5807 | 1.4 | 1.0 | 1.3 | RPS24      | complemer ribosomal protein S24. orf19.5466  | 4146  | IPF4149    | SUBCELLLmolecular_function unknown                                                                                       |
| CA5810 | 1.1 | 1.4 | 1.1 | IPF4137.3f | complemer unknown function, 3-prime end      | 19666 | CaRPS24    | PROTEIN :structural molecule activity                                                                                    |
| CA5811 | 1.1 | 1.1 | 1.0 | IPF2690.5f | 17150621..unknown function, 5-pr orf19.5469  | 2690  | IPF4137.3f | No significant S.c. match                                                                                                |
| CA5812 | 1.2 | 1.0 | 1.3 | IPF2690.3f | 17153754..unknown function, 3-pr orf19.5474  | 2681  | IPF2690.5f | No significant S.c. match                                                                                                |
| CA5813 | 1.0 | 1.0 | 1.1 | IPF2522    | 17159664..unknown function orf19.7460        | 2522  | IPF2690.3f | No significant S.c. match                                                                                                |
| CA5814 | 0.9 | 1.1 | 0.9 | IPF2521    | complemer putative protease (by h orf19.7463 | 2521  | IPF2522    | UNCLASSImolecular_function unknown                                                                                       |
| CA5815 | 0.9 | 1.1 | 1.0 | IPF2517    | complemer putative protease (by h orf19.7464 | 2517  | IPF2521    | PROTEIN lpeptidase activity                                                                                              |
| CA5816 | 1.7 | 1.7 | 1.5 | ACC1       | complemer acetyl-coenzyme-A car orf19.7466   | 2516  | IPF2517    | PROTEIN FATE [folding modification destination]                                                                          |
| CA5817 | 1.0 | 0.9 | 1.0 | IPF2511    | complemer unknown function orf19.7468        | 2511  | CaACC1     | Lipid fatty-z ligase activity                                                                                            |
| CA5818 | 0.9 | 1.4 | 0.9 | ARG1       | 17175287..argininosuccinate syntl orf19.7469 | 2508  | IPF2511    | UNCLASSImolecular_function unknown                                                                                       |
| CA5819 | 1.0 | 1.0 | 0.9 | IFF4       | complemer Unknown function orf19.7472        | 2507  | CaARG1     | Amino acid ligase activity                                                                                               |
| CA5820 | 0.9 | 1.0 | 1.0 | IPF2500    | 17182862..unknown function orf19.7473        | 2500  | CaIFF4     | CELL CYCLE AND DNA PROCESSING CELL FATE                                                                                  |
| CA5821 | 1.0 | 1.1 | 1.0 | PHO81      | complemer Cyclin-dependent kina: orf19.7475  | 2499  | IPF2500    | No significant S.c. match                                                                                                |
| CA5822 | 0.9 | 0.8 | 1.2 | YRB1       | complemer GTPase-activating pro orf19.7477   | 2494  | CaPHO81    | Phosphate enzyme regulator activity                                                                                      |
| CA5823 | 0.9 | 0.9 | 1.0 | COQ1       | complemer Hexaprenyl pyrophosp orf19.7478    | 2493  | CaYRB1     | TRANSCR protein binding                                                                                                  |
| CA5824 | 0.8 | 0.8 | 0.7 | NTH1       | complemer Neutral trehalase orf19.7479       | 2490  | CaCOQ1     | Lipid fatty-z transferase activity                                                                                       |
| CA5825 | 1.2 | 1.0 | 1.1 | IPF2489    | complemer unknown function orf19.7480        | 2489  | CaNTH1     | C-compour hydrolase activity                                                                                             |
| CA5826 | 0.7 | 1.3 | 0.6 | MDH11      | 17198457..Malate dehydrogenase orf19.7481    | 2486  | IPF2489    | No significant S.c. match                                                                                                |
| CA5827 | 1.0 | 1.1 | 1.0 | IPF2485    | complemer unknown function orf19.7482        | 2485  | CaMDH11    | C-compound and carbohydrate metabolism ENERGY SUBCELLULAR LOCALISATION                                                   |
| CA5828 | 1.2 | 1.1 | 1.1 | CRM1       | 17201081..Nuclear export factor orf19.7483   | 2484  | IPF2485    | CELLULAR TRANSPORT AND TRANSPORT MECHANISMS CONTROL OF CELLULAR ORGANIZATION                                             |
| CA5829 | 1.1 | 1.0 | 1.1 | ADE1       | 17204785..phosphoribosyl-amidoi orf19.7484   | 2482  | CaCRM1     | TRANSCR protein binding                                                                                                  |
| CA5830 | 1.0 | 1.0 | 1.1 | MRPL9      | complemer Mitochondrial ribosom: orf19.7485  | 2480  | CaADE1     | Nucleotide ligase activity                                                                                               |
| CA5831 | 1.0 | 1.0 | 1.0 | MRPL6      | complemer ribosomal protein L6 pi orf19.7486 | 438   | CaMRPL9    | PROTEIN :structural molecule activity                                                                                    |
| CA5833 | 1.2 | 1.2 | 1.0 | IMP3       | complemer U3 small nucleolar ribc orf19.7488 | 436   | CaMRPL6    | PROTEIN :structural molecule activity                                                                                    |
| CA5834 | 1.1 | 1.2 | 1.0 | LRG1       | 17214014..GTPase-activating pro orf19.7489   | 434   | CaIMP3     | TRANSCR RNA binding                                                                                                      |
| CA5835 | 1.1 | 1.0 | 1.0 | IPF429     | 17218782..unknown function                   | 429   | CaLRG1     | CELL FATIenzyme regulator activity                                                                                       |
| CA5836 | 1.0 | 1.0 | 1.0 | IPF428     | complemer transport protein (by h orf19.7490 | 428   | IPF429     | UNCLASSImolecular_function unknown                                                                                       |
| CA5837 | 1.1 | 1.1 | 1.0 | IPF426     | complemer unknown function orf19.7491        | 426   | IPF428     | UNCLASSImolecular_function unknown                                                                                       |
| CA5838 | 1.0 | 0.9 | 0.9 | IPF424     | 17222636..unknown function orf19.7492        | 424   | IPF426     | CLASSIFICmolecular_function unknown                                                                                      |
| CA5839 | 1.0 | 0.9 | 1.0 | IPF423     | complemer unknown function orf19.7494        | 423   | IPF424     | UNCLASSImolecular_function unknown                                                                                       |

|        |     |     |     |            |                                                |       |            |                                                     |                                                                                                            |
|--------|-----|-----|-----|------------|------------------------------------------------|-------|------------|-----------------------------------------------------|------------------------------------------------------------------------------------------------------------|
| CA5840 | 1.0 | 1.0 | 1.0 | EBP6       | complemer NADPH dehydrogenas orf19.7495        | 421   | IPF423     | UNCLASSI                                            | molecular_function unknown                                                                                 |
| CA5841 | 0.9 | 1.0 | 0.7 | IPF420     | complemer unknown function orf19.7497          | 420   | CaEBP6     | ENERGY                                              |                                                                                                            |
| CA5842 | 1.0 | 1.0 | 1.0 | LEU1       | 17234862..3-isopropylmalate dehy orf19.7498    | 417   | IPF420     | UNCLASSI                                            | protein binding                                                                                            |
| CA5843 | 1.0 | 0.9 | 1.0 | IPF416     | complemer unknown function orf19.7499          | 416   | CaLEU1     | Amino acid                                          | lyase activity                                                                                             |
| CA5844 | 1.0 | 1.0 | 1.0 | PXA1       | 17240440..long chain fatty acid At orf19.7500  | 414   | IPF416     | UNCLASSI                                            | nucleotidyltransferase activity                                                                            |
| CA5845 | 1.0 | 0.9 | 0.8 | NAP1       | 17243186..nucleosome assembly orf19.7501       | 412   | CaPXA1     | Lipid fatty-ε                                       | transporter activity,hydrolase activity                                                                    |
| CA5846 | 1.8 | 1.5 | 1.4 | IPF409     | 17249939..unknown function orf19.7502          | 409   | CaNAP1     | CELL                                                | CYC protein binding                                                                                        |
| CA5847 | 1.0 | 0.9 | 1.1 | CDA2       | complemer chitin deacetylase ( by lorf19.7503  | 408   | IPF409     | C-compound and carbohydrate metabolism              | CELLULAR TRANSPORT AND TRANSPORT MECHANISMS REGULATION OF/INTERACTI                                        |
| CA5848 | 1.2 | 1.1 | 1.1 | IPF407     | complemer unknown function orf19.7504          | 407   | CaCDA2     | C-compour                                           | hydrolase activity                                                                                         |
| CA5849 | 1.0 | 0.8 | 1.1 | IPF404.5F  | 17257630..unknown function, 5-pr orf19.7506    | 404   | IPF407     | UNCLASSI                                            | molecular_function unknown                                                                                 |
| CA5850 | 0.9 | 1.0 | 1.0 | IPF404.3F  | 17258777..unknown function, 3-pr orf19.7507    | 403   | IPF404.5f  | SUBCELLULAR LOCALISATION                            |                                                                                                            |
| CA5851 | 1.1 | 1.2 | 1.1 | KIN2       | complemer ser/thr protein kinase ( orf19.7510  | 402   | IPF404.3f  | No significant S.c.                                 | match                                                                                                      |
| CA5852 | 1.1 | 1.0 | 1.2 | ATP17.3    | complemer F1F0-ATPase complex, F1 delta s      | 396   | CaKIN2     | SUBCELLL                                            | protein kinase activity                                                                                    |
| CA5853 | 1.0 | 1.0 | 1.0 | LSM6       | complemer U6 snRNA-associated Sm-like pro      | 395   | CaATP17.:  | ENERGY "                                            | transporter activity                                                                                       |
| CA5854 | 1.0 | 1.1 | 1.0 | IPF393     | complemer similar to Saccharomy orf19.7511     | 393   | CaLSM6     | TRANSCR                                             | RNA binding                                                                                                |
| CA5855 | 1.0 | 0.9 | 0.9 | ALK3       | complemer n-alkane inducible cyt orf19.7512    | 389   | IPF393     | CELLULAF                                            | structural molecule activity                                                                               |
| CA5856 | 1.0 | 1.0 | 1.0 | ALK2       | complemer n-alkane inducible cyt orf19.7513    | 387   | CaALK3     | CELL RESCUE                                         | DEFENSE AND VIRULENCE ""CELL FATE CONTROL OF CELLULAR ORGANIZATION                                         |
| CA5857 | 1.8 | 1.7 | 1.4 | PCK1       | complemer phosphoenolpyruvate orf19.7514       | 385   | CaALK2     | CELL RESCUE                                         | DEFENSE AND VIRULENCE ""CELL FATE CONTROL OF CELLULAR ORGANIZATION                                         |
| CA5858 | 1.0 | 0.9 | 1.0 | IPF380     | complemer unknown function orf19.7516          | 380   | CaPCK1     | C-compour                                           | lyase activity                                                                                             |
| CA5859 | 1.0 | 1.0 | 1.0 | CHT1       | 17281907..endochitinase 1 precur orf19.7517    | 377   | IPF380     | No significant S.c.                                 | match                                                                                                      |
| CA5860 | 1.0 | 1.0 | 1.0 | IPF376     | complemer transcriptional regulato orf19.7518  | 376   | CaCHT1     | C-compound and carbohydrate metabolism              | CELL CYCLE AND DNA PROCESSING SUBCELLULAR LOCALISATION                                                     |
| CA5861 | 1.0 | 1.1 | 1.0 | IPF373     | 17285363..unknown function orf19.7519          | 373   | IPF376     | TRANSCRIPTION ""                                    | CELL RESCUE DEFENSE AND VIRULENCE ""SUBCELLULAR LOCALISATION                                               |
| CA5862 | 0.9 | 0.9 | 0.7 | POT11      | 17286419..peroxysomal 3-ketoacy orf19.7520     | 372   | IPF373     | No significant S.c.                                 | match                                                                                                      |
| CA5863 | 1.0 | 0.9 | 1.0 | IPF370     | complemer unknown function orf19.7521          | 370   | CaPOT11    | Lipid fatty-ε                                       | transferase activity                                                                                       |
| CA5864 | 1.1 | 0.9 | 1.0 | IPF364     | 17292399..transaminase type I (b) orf19.7522   | 364   | IPF370     | No significant S.c.                                 | match                                                                                                      |
| CA5865 | 1.1 | 1.1 | 1.4 | MKC1       | 17294244..ser/thr protein kinase corf19.7523   | 363   | IPF364     | Nitrogen and sulphur                                | metabolism                                                                                                 |
| CA5866 | 1.0 | 1.0 | 0.9 | IPF361     | complemer unknown function orf19.7527          | 361   | CaMKC1     | CELL                                                | CYC protein kinase activity,signal transducer activity                                                     |
| CA5867 | 0.4 | 0.5 | 0.4 | EPL1       | 17299106..DNA-binding protein (t orf19.7529    | 355   | IPF361     | No significant S.c.                                 | match                                                                                                      |
| CA5868 | 1.0 | 0.9 | 1.4 | IPF351     | 17301483..unknown function orf19.7531          | 351   | CaEPL1     | UNCLASSI                                            | transferase activity                                                                                       |
| CA5869 | 1.0 | 1.2 | 1.1 | MIS12      | complemer mitochondrial C1-tetral orf19.7534   | 349   | IPF351     | UNCLASSI                                            | molecular_function unknown                                                                                 |
| CA5870 | 0.9 | 1.0 | 1.0 | IPF345     | complemer FH1/FH2 involved in c1 orf19.7537    | 345   | CaMIS12    | Amino acid metabolism                               | Nucleotide metabolism C-compound and carbohydrate metabolism ""Metabolism of vitamins cofactors and prosth |
| CA5871 | 0.9 | 1.0 | 1.0 | PIF2       | 17309819..DNA helicase (by hom orf19.7538      | 336   | IPF345     | CELL                                                | CYCLE AND DNA PROCESSING CELL FATE SUBCELLULAR LOCALISATION                                                |
| CA5872 | 1.0 | 1.0 | 0.9 | IPF333     | complemer unknown function orf19.7539          | 333   | CaPIF2     | CELL                                                | CYC DNA binding,helicase activity                                                                          |
| CA5873 | 1.0 | 1.0 | 1.0 | IPF331     | 17314831..GPI-anchored cell surf orf19.7542    | 331   | IPF333     | No significant S.c.                                 | match                                                                                                      |
| CA5874 | 1.0 | 1.0 | 0.9 | CTA23      | complemer transcriptional activatic orf19.7544 | 328   | IPF331     | No significant S.c.                                 | match                                                                                                      |
| CA5875 | 0.9 | 0.9 | 1.0 | IPF324.3   | 17319171..unknown function, , 3-1 orf19.7545   | 324   | CaCTA23    | No significant S.c.                                 | match                                                                                                      |
| CA5876 | 0.9 | 0.9 | 0.9 | IPF12082.ε | 17327332..bumetanide-sensitive 1 orf19.6833    | 12082 | IPF324.3   | No significant S.c.                                 | match                                                                                                      |
| CA5877 | 1.0 | 0.9 | 1.0 | IPF12082.ε | 17329088..bumetanide-sensitive 1 orf19.6832    | 12080 | IPF12082.ε | REGULATI                                            | transporter activity                                                                                       |
| CA5878 | 1.0 | 1.0 | 1.0 | PRP5       | 17331400..pre-mRNA processing orf19.6831       | 12079 | IPF12082.ε | REGULATION OF/INTERACTION WITH CELLULAR ENVIRONMENT | TRANSPORT FACILITATION                                                                                     |
| CA5879 | 0.9 | 0.8 | 0.8 | IPF12076   | 17334373..enoyl CoA hydratase (lorf19.6830     | 12076 | CaPRP5     | TRANSCR                                             | RNA binding,helicase activity                                                                              |
| CA5880 | 1.0 | 0.8 | 1.0 | IPF12074   | 17335442..unknown function orf19.6829          | 12074 | IPF12076   | CLASSIFICATION NOT YET CLEAR-CUT                    |                                                                                                            |
| CA5881 | 0.9 | 1.0 | 1.1 | SSS1       | 17337707..ER protein-translocase complex su    | 2429  | IPF12074   | Phosphate                                           | molecular_function unknown                                                                                 |
| CA5882 | 1.0 | 1.1 | 1.1 | RRP1       | 17338576..involved in processing orf19.6828    | 20032 | CaSSS1     | PROTEIN I                                           | transporter activity                                                                                       |
| CA5883 | 1.0 | 1.1 | 1.1 | IPF2425    | 17339844..unknown function orf19.6827          | 2425  | CaRRP1     | TRANSCR                                             | molecular_function unknown                                                                                 |
| CA5884 | 1.0 | 1.0 | 1.0 | SLF1       | complemer Copper homeostasis p orf19.6826      | 2424  | IPF2425    | TRANSCR                                             | protein binding                                                                                            |
| CA5885 | 1.0 | 0.9 | 1.0 | IPF2419    | 17345064..unknown function orf19.6824          | 2419  | CaSLF1     | PROTEIN I                                           | RNA binding                                                                                                |
| CA5886 | 0.9 | 0.8 | 1.0 | IPF2417    | complemer unknown function orf19.6822          | 2417  | IPF2419    | No significant S.c.                                 | match                                                                                                      |
| CA5887 | 1.0 | 1.0 | 0.9 | IPF2415    | 17348282..similar to Saccharomy orf19.6821     | 2415  | IPF2417    | UNCLASSI                                            | molecular_function unknown                                                                                 |
| CA5888 | 0.8 | 0.9 | 0.9 | IPF2414    | complemer unknown function orf19.6820          | 2414  | IPF2415    | CELL                                                | CYC protein binding                                                                                        |
| CA5889 | 0.9 | 1.0 | 1.0 | IPF2409    | complemer RNA-dependent ATPa orf19.6818        | 2409  | IPF2414    | TRANSCRIPTION                                       |                                                                                                            |
| CA5890 | 0.8 | 0.7 | 1.1 | FCR1       | 17364525..Zinc cluster transcriptic orf19.6817 | 2404  | IPF2409    | CLASSIFIC                                           | helicase activity                                                                                          |
| CA5891 | 1.0 | 1.1 | 1.0 | IPF2400    | complemer putative aldehyde redu orf19.6816    | 2400  | CaFCR1     | TRANSCRIPTION                                       |                                                                                                            |
| CA5892 | 3.5 | 4.0 | 2.3 | GAP1       | 17370939..Glyceraldehyde-3-phos orf19.6814     | 2397  | IPF2400    | C-compour                                           | oxidoreductase activity                                                                                    |
| CA5893 | 1.1 | 1.1 | 1.1 | IPF2392    | 17372227..unknown function orf19.6813          | 2392  | CaGAP1     | C-compour                                           | oxidoreductase activity                                                                                    |
| CA5894 | 1.0 | 1.0 | 1.0 | PMT2       | 17373364..O-D-mannosyltransfer: orf19.6812     | 2391  | IPF2392    | No significant S.c.                                 | match                                                                                                      |
| CA5895 | 0.5 | 0.5 | 0.5 | ISA2       | 17376082..Mitochondrial protein r orf19.6811   | 2389  | CaPMT2     | C-compour                                           | transferase activity                                                                                       |
| CA5896 | 1.0 | 1.0 | 1.0 | TPD3       | complemer Ser/thr protein phosphi orf19.6810   | 2388  | CaISA2     | REGULATI                                            | molecular_function unknown                                                                                 |
| CA5897 | 0.9 | 1.0 | 1.0 | IPF2384    | 17380149..unknown function orf19.6809          | 2384  | CaTPD3     | CELL                                                | CYC protein phosphatase activity                                                                           |
| CA5898 | 0.8 | 0.7 | 0.9 | IPF2383    | complemer unknown function orf19.6808          | 2383  | IPF2384    | ENERGY                                              | molecular_function unknown                                                                                 |
| CA5899 | 0.9 | 1.0 | 1.0 | IPF2382    | 17381350..unknown function orf19.6807          | 2382  | IPF2383    | No significant S.c.                                 | match                                                                                                      |
| CA5900 | 1.0 | 0.9 | 0.9 | IPF2379    | complemer unknown function orf19.6806          | 2379  | IPF2382    | PROTEIN FATE [folding modification destination] ""  | CELLULAR TRANSPORT AND TRANSPORT MECHANISMS                                                                |
| CA5901 | 1.0 | 1.0 | 1.0 | IPF2374    | 17388033..unknown function orf19.6805          | 2374  | IPF2379    | No significant S.c.                                 | match                                                                                                      |
| CA5902 | 1.0 | 1.0 | 1.0 | SRP68      | 17391904..SIGNAL RECOGNITIC orf19.6804         | 5941  | IPF2374    | UNCLASSI                                            | molecular_function unknown                                                                                 |
| CA5903 | 1.0 | 0.9 | 0.9 | IPF5942    | 17393983..transmembrane sugar orf19.6803       | 5942  | CaSRP68    | PROTEIN FATE [folding modification destination] ""  | SUBCELLULAR LOCALISATION                                                                                   |
| CA5904 | 1.0 | 1.0 | 1.1 | IPF5944    | 17395480..Unknown function orf19.6802          | 5944  | IPF5942    | UNCLASSI                                            | transporter activity                                                                                       |
| CA5905 | 1.0 | 1.0 | 0.9 | RPD32      | 17396909..histone deacetylase B orf19.6801     | 5946  | IPF5944    | UNCLASSI                                            | molecular_function unknown                                                                                 |
| CA5906 | 1.0 | 1.0 | 1.0 | IPF5949    | 17399353..unknown function orf19.6800          | 5949  | CaRPD32    | Phosphate                                           | hydrolase activity                                                                                         |
| CA5907 | 1.0 | 0.9 | 0.8 | SSN6       | 17404006..transcriptional repress orf19.6798   | 5957  | IPF5949    | UNCLASSIFIED                                        | PROTEINS                                                                                                   |
| CA5908 | 0.9 | 1.1 | 1.0 | IPF5960    | complemer unknown function orf19.6797          | 5960  | CaSSN6     | TRANSCR                                             | transcription regulator activity                                                                           |
| CA5909 | 1.1 | 1.0 | 1.0 | YSA1       | complemer sugar-nucleotide hydrc orf19.6796    | 5962  | IPF5960    | No significant S.c.                                 | match                                                                                                      |
| CA5910 | 1.0 | 1.0 | 1.0 | IPF5964    | 17411494..unknown function orf19.6795          | 5964  | CaYSA1     | Nucleotide                                          | hydrolase activity                                                                                         |
| CA5911 | 0.9 | 0.9 | 1.0 | IPF5965    | 17412612..NADH-ubiquinone oxic orf19.6794      | 5965  | IPF5964    | No significant S.c.                                 | match                                                                                                      |



|        |     |     |     |           |                                     |            |       |           |                                                                                                                     |
|--------|-----|-----|-----|-----------|-------------------------------------|------------|-------|-----------|---------------------------------------------------------------------------------------------------------------------|
| CA5912 | 1.0 | 1.1 | 1.0 | IPF5966   | complemer unknown function          | orf19.6793 | 5966  | IPF5965   | No significant S.c. match                                                                                           |
| CA5913 | 1.1 | 1.1 | 1.1 | RRD1      | 17416297..Phosphotyrosyl phospho    | orf19.6792 | 10731 | IPF5966   | No significant S.c. match                                                                                           |
| CA5914 | 1.4 | 1.3 | 0.8 | HHT3      | 17418335..histone H3                | orf19.6791 | 10733 | CaRRD1    | CELL CYC protein phosphatase activity                                                                               |
| CA5915 | 1.0 | 0.9 | 0.9 | IPF10735  | complemer similar to Saccharomy     | orf19.6790 | 10735 | CaHHT3    | TRANSCRIPTION SUBCELLULAR LOCALISATION                                                                              |
| CA5916 | 1.0 | 0.9 | 0.9 | IPF19818  | 17424240..similar to Saccharomy     | orf19.6789 | 19818 | IPF10735  | TRANSCR RNA binding                                                                                                 |
| CA5917 | 1.0 | 1.0 | 1.1 | IPF8923   | 17428344..unknown function          | orf19.6788 | 8923  | IPF19818  | CELL CYC structural molecule activity                                                                               |
| CA5918 | 0.9 | 1.0 | 1.0 | ERV14     | 17429739..membrane protein          | orf19.6787 | 8924  | IPF8923   | CELLULAR TRANSPORT AND TRANSPORT MECHANISMS SUBCELLULAR LOCALISATION                                                |
| CA5919 | 0.9 | 1.1 | 0.9 | IPF8926.3 | complemer unknown function, 3-pr    | orf19.6786 | 8926  | CaERV14   | CELLULAF molecular_function unknown                                                                                 |
| CA5920 | 1.0 | 1.1 | 1.2 | RPS12     | complemer acidic ribosomal protei   | orf19.6785 | 8927  | IPF8926.3 | No significant S.c. match                                                                                           |
| CA5921 | 1.2 | 1.1 | 1.1 | IPF8930   | 17433971..unknown function          | orf19.6784 | 8930  | CaRPS12   | PROTEIN !structural molecule activity                                                                               |
| CA5922 | 1.1 | 1.1 | 1.1 | MRS6      | complemer geranylgeranyltransfer    | orf19.6783 | 8931  | IPF8930   | No significant S.c. match                                                                                           |
| CA5923 | 1.1 | 1.0 | 1.0 | IFQ2      | complemer Unknown function          | orf19.6782 | 2825  | CaMRS6    | Lipid fatty-ε enzyme regulator activity                                                                             |
| CA5924 | 0.8 | 1.0 | 0.7 | IPF2822   | complemer unknown function          | orf19.6781 | 2822  | CaIFQ2    | No significant S.c. match                                                                                           |
| CA5925 | 0.9 | 0.8 | 0.9 | MET8      | 17448528..Siroheme synthase (b)     | orf19.6780 | 2818  | IPF2822   | No significant S.c. match                                                                                           |
| CA5926 | 1.1 | 1.1 | 1.1 | PRO2      | complemer Proline biosynthetic en   | orf19.6779 | 2817  | CaMET8    | Amino acid lyase activity                                                                                           |
| CA5927 | 1.0 | 0.9 | 0.9 | DRS22     | 17451300..Membrane-spanning C       | orf19.6778 | 2816  | CaPRO2    | Amino acid oxidoreductase activity                                                                                  |
| CA5928 | 0.9 | 0.8 | 1.0 | IPF2815   | 17456300..unknown function          | orf19.6777 | 2815  | CaDRS22   | CELLULAF hydrolase activity                                                                                         |
| CA5929 | 1.0 | 1.1 | 1.0 | GCD2      | 17457337..Translation initiation fa | orf19.6776 | 2813  | IPF2815   | No significant S.c. match                                                                                           |
| CA5930 | 0.9 | 0.8 | 1.1 | ECM29.EX  | complemer Involved in cell wall bic | orf19.6773 | 2810  | CaGCD2    | PROTEIN !translation regulator activity                                                                             |
| CA5931 | 1.1 | 1.0 | 1.0 | ECM29.EX  | complemer Involved in cell wall bic | orf19.6772 | 2807  | CaECM29   | CONTROL molecular_function unknown                                                                                  |
| CA5932 | 0.9 | 1.0 | 1.0 | UBI4      | complemer Polyubiquitin             | orf19.6771 | 2805  | CaECM29   | CONTROL OF CELLULAR ORGANIZATION UNCLASSIFIED PROTEINS                                                              |
| CA5933 | 1.1 | 0.9 | 1.3 | IPF2804   | complemer unknown function          | orf19.6770 | 2804  | CaUBI4    | No significant S.c. match                                                                                           |
| CA5934 | 1.0 | 1.0 | 0.9 | IPF2802   | 17469283..unknown function          | orf19.6769 | 2802  | IPF2804   | UNCLASSIprotein binding                                                                                             |
| CA5935 | 1.0 | 1.0 | 1.0 | IPF2798   | 17471697..unknown function          | orf19.6766 | 2798  | IPF2802   | UNCLASSImolecular_function unknown                                                                                  |
| CA5936 | 1.5 | 2.6 | 1.3 | IPF2795   | complemer unknown function          | orf19.6763 | 2795  | IPF2798   | TRANSCR RNA binding                                                                                                 |
| CA5937 | 1.0 | 1.0 | 1.1 | IPF2784   | 17479036..unknown function          | orf19.6760 | 2784  | IPF2795   | CELL CYCLE AND DNA PROCESSING                                                                                       |
| CA5938 | 0.9 | 0.9 | 1.0 | IPF3481   | 17481199..unknown function          | orf19.6759 | 3482  | IPF2784   | CELL FATImolecular_function unknown                                                                                 |
| CA5939 | 1.0 | 1.0 | 1.0 | IPF3484   | 17483668..aldo/keto reductase (b)   | orf19.6758 | 3484  | IPF3481   | CELL FATE                                                                                                           |
| CA5940 | 1.1 | 1.0 | 1.0 | IPF3485   | 17484974..aldo/keto reductase (b)   | orf19.6757 | 3485  | IPF3484   | C-compound and carbohydrate metabolism SUBCELLULAR LOCALISATION                                                     |
| CA5941 | 1.1 | 1.1 | 1.2 | IPF3486   | 17486121..unknown function          | orf19.6756 | 3486  | IPF3485   | C-compour oxidoreductase activity                                                                                   |
| CA5942 | 1.1 | 1.0 | 1.0 | DLD2      | 17487290..D-lactate ferricythro     | orf19.6755 | 3488  | IPF3486   | UNCLASSIenzyme regulator activity                                                                                   |
| CA5943 | 1.0 | 0.8 | 1.1 | IPF3490   | 17489734..unknown function          | orf19.6754 | 3490  | CaDLD2    | C-compour oxidoreductase activity                                                                                   |
| CA5944 | 1.0 | 1.1 | 1.1 | IPF3491   | 17490890..unknown function          | orf19.6753 | 3491  | IPF3490   | No significant S.c. match                                                                                           |
| CA5945 | 0.9 | 0.9 | 0.9 | IPF3492   | complemer unknown function          | orf19.6752 | 3492  | IPF3491   | UNCLASSImolecular_function unknown                                                                                  |
| CA5946 | 0.9 | 1.0 | 1.0 | IPF3493   | 17492307..unknown function          | orf19.6751 | 3493  | IPF3492   | PROTEIN !structural molecule activity                                                                               |
| CA5947 | 1.1 | 1.0 | 1.2 | KRS1      | complemer Lysyl-tRNA synthetase     | orf19.6749 | 3495  | IPF3493   | TRANSCR transferase activity                                                                                        |
| CA5948 | 0.9 | 1.0 | 1.0 | IPF3496   | 17495321..unknown function          | orf19.6748 | 3496  | CaKRS1    | PROTEIN !ligase activity                                                                                            |
| CA5949 | 1.0 | 1.0 | 1.0 | IPF3498   | 17496843..unknown function          | orf19.6747 | 3498  | IPF3496   | No significant S.c. match                                                                                           |
| CA5950 | 1.4 | 1.4 | 1.9 | TP11      | 17498034..Triose phosphate isom     | orf19.6745 | 3499  | IPF3498   | UNCLASSImolecular_function unknown                                                                                  |
| CA5951 | 1.0 | 1.0 | 1.0 | IPF3500   | complemer unknown function          | orf19.6744 | 3500  | CaTP11    | C-compour isomerase activity                                                                                        |
| CA5952 | 0.9 | 0.9 | 1.0 | IPF3503   | 17500349..similar to Saccharomy     | orf19.6742 | 3503  | IPF3500   | CELL CYC molecular_function unknown                                                                                 |
| CA5953 | 1.1 | 0.9 | 1.1 | IPF3506   | 17503763..unknown function          | orf19.6741 | 3506  | IPF3503   | TRANSCR protein phosphatase activity                                                                                |
| CA5954 | 0.9 | 0.9 | 1.0 | IPF3508   | 17505368..unknown function          | orf19.6740 | 3508  | IPF3506   | UNCLASSIFIED PROTEINS                                                                                               |
| CA5955 | 1.0 | 0.9 | 1.0 | IPF3510   | 17506855..unknown function          | orf19.6739 | 3510  | IPF3508   | TRANSCR RNA binding                                                                                                 |
| CA5956 | 1.2 | 1.1 | 1.1 | VAN1      | 17509387..Vanadate resistance p     | orf19.6738 | 3512  | IPF3510   | C-compour molecular_function unknown                                                                                |
| CA5957 | 0.9 | 1.1 | 1.0 | RRP3.3EO  | 17511492..RNA-dependent ATPa        | orf19.7546 | 17103 | CaVAN1    | CELL CYC transferase activity                                                                                       |
| CA5958 | 1.1 | 0.8 | 1.1 | PIB1      | complemer phosphatidylinositol(3)   | orf19.7547 | 17102 | CaRRP3.3  | TRANSCR RNA binding,helicase activity                                                                               |
| CA5959 | 1.0 | 1.0 | 1.0 | SRB7      | 17514692..DNA-directed RNA pol      | orf19.7548 | 12936 | CaPIB1    | Lipid fatty-ε ligase activity                                                                                       |
| CA5960 | 0.9 | 1.0 | 1.1 | PMT5      | complemer protein mannosyltransf    | orf19.7549 | 12934 | CaSRB7    | TRANSCR transcription regulator activity                                                                            |
| CA5961 | 1.0 | 1.0 | 1.0 | IFA14     | complemer unknown function          | orf19.7550 | 12930 | CaPMT5    | C-compound and carbohydrate metabolism ""PROTEIN FATE (folding modification destination) ""SUBCELLULAR LOCALISATION |
| CA5962 | 1.0 | 1.2 | 1.0 | ALO1      | 17532037..D-arabinono-1,4-lactor    | orf19.7551 | 967   | CaIFA14   | No significant S.c. match                                                                                           |
| CA5963 | 1.0 | 1.0 | 1.0 | IPF966    | complemer unknown function          | orf19.7552 | 966   | CaALO1    | C-compour oxidoreductase activity                                                                                   |
| CA5964 | 1.1 | 0.9 | 0.9 | IPF963    | 17537148..unknown function          | orf19.7553 | 963   | IPF966    | UNCLASSIRNA binding                                                                                                 |
| CA5965 | 0.9 | 0.9 | 1.0 | IPF961    | 17538370..drug resistance protein   | orf19.7554 | 961   | IPF963    | No significant S.c. match                                                                                           |
| CA5966 | 1.0 | 1.0 | 1.0 | IPF959    | complemer unknown function          | orf19.7556 | 959   | IPF961    | CELL RESCUE DEFENSE AND VIRULENCE ""TRANSPORT FACILITATION                                                          |
| CA5967 | 1.0 | 1.0 | 1.1 | IPF955    | 17542095..member of the AAA A1      | orf19.7558 | 955   | IPF959    | No significant S.c. match                                                                                           |
| CA5968 | 2.2 | 1.5 | 1.8 | IPF946    | 17547457..unknown function          | orf19.7561 | 946   | IPF955    | PROTEIN Imolecular_function unknown                                                                                 |
| CA5969 | 1.0 | 1.1 | 1.0 | BET2      | complemer beta subunit of geranyl   | orf19.7563 | 941   | IPF946    | No significant S.c. match                                                                                           |
| CA5970 | 1.0 | 1.0 | 0.9 | DPB2      | complemer DNA-directed DNA pol      | orf19.7564 | 940   | CaBET2    | Lipid fatty-ε transferase activity                                                                                  |
| CA5971 | 1.0 | 1.1 | 0.9 | GNP2      | 17560024..high affinity glutamine   | orf19.7565 | 937   | CaDPB2    | CELL CYC nucleotidyltransferase activity                                                                            |
| CA5972 | 1.0 | 1.0 | 1.0 | GNP1      | 17564170..high affinity glutamine   | orf19.7566 | 934   | CaGNP2    | Amino acid metabolism TRANSPORT FACILITATION                                                                        |
| CA5973 | 1.0 | 1.1 | 1.0 | IPF931    | 17566719..unknown function          | orf19.7567 | 931   | CaGNP1    | Amino acid metabolism TRANSPORT FACILITATION                                                                        |
| CA5974 | 1.0 | 1.0 | 0.9 | IPF930    | 17568313..unknown function          | orf19.7568 | 930   | IPF931    | UNCLASSImolecular_function unknown                                                                                  |
| CA5975 | 0.9 | 1.1 | 1.0 | SIK1      | complemer nucleolar protein invol   | orf19.7569 | 929   | IPF930    | CELL FATImolecular_function unknown                                                                                 |
| CA5976 | 0.7 | 0.9 | 0.5 | IPF928    | complemer zinc-finger transcriptio  | orf19.7570 | 928   | CaSIK1    | TRANSCR molecular_function unknown                                                                                  |
| CA5977 | 1.1 | 1.0 | 1.0 | UBC4.3    | 17575390..E2 ubiquitin-conjugatin   | orf19.7571 | 926   | IPF928    | Nitrogen ar transcription regulator activity                                                                        |
| CA5978 | 1.0 | 1.1 | 1.0 | SPT7      | 17576602..transcription factor, me  | orf19.7572 | 925   | CaUBC4.3  | PROTEIN FATE (folding modification destination) ""CELLULAR TRANSPORT AND TRANSPORT MECHANISMS ""CELL RESCUE DEFEI   |
| CA5979 | 1.1 | 1.0 | 1.0 | IPF921    | 17581159..BTB domain and Anka       | orf19.7574 | 921   | CaSPT7    | TRANSCR structural molecule activity                                                                                |
| CA5980 | 1.0 | 0.5 | 1.1 | IPF918    | complemer unknown function          | orf19.7576 | 918   | IPF921    | TRANSCRIPTION CELLULAR TRANSPORT AND TRANSPORT MECHANISMS CELL FATE SUBCELLULAR LOCALISATION                        |
| CA5981 | 0.9 | 0.9 | 1.1 | MSS51     | complemer involved in maturation    | orf19.7577 | 917   | IPF918    | No significant S.c. match                                                                                           |
| CA5982 | 1.1 | 1.1 | 1.1 | IPF915    | complemer unknown function          | orf19.7578 | 915   | CaMSS51   | PROTEIN !molecular_function unknown                                                                                 |
| CA5983 | 1.1 | 1.0 | 0.9 | IPF913    | 17589318..unknown function          | orf19.7579 | 913   | IPF915    | SUBCELLtransporter activity                                                                                         |

|        |     |     |     |           |                                                 |                 |                                                                                     |
|--------|-----|-----|-----|-----------|-------------------------------------------------|-----------------|-------------------------------------------------------------------------------------|
| CA5984 | 1.0 | 0.9 | 0.9 | CUS1      | 17591992..spliceosome associate orf19.7581      | 911 IPF913      | No significant S.c. match                                                           |
| CA5985 | 1.0 | 1.1 | 1.1 | IPF907    | complemer unknown function orf19.7583           | 907 CaCUS1      | TRANSCR protein binding,RNA binding                                                 |
| CA5986 | 1.1 | 1.0 | 1.2 | IN01      | complemer myo-inositol-1-phosph:orf19.7585      | 904 IPF907      | Lipid fatty-acid and isoprenoid metabolism ""TRANSCRIPTION SUBCELLULAR LOCALISATION |
| CA5987 | 1.0 | 1.0 | 1.0 | CHT3      | 17603077..chitinase 3 precursor orf19.7586      | 696 CaINO1      | C-compour isomerase activity                                                        |
| CA5988 | 1.0 | 1.0 | 1.0 | IPF693    | complemer unknown function orf19.7588           | 693 CaCHT3      | C-compour hydrolase activity                                                        |
| CA5989 | 1.0 | 1.0 | 0.9 | IPF692    | 17605943..unknown function orf19.7589           | 692 IPF693      | UNCLASSImolecular_function unknown                                                  |
| CA5990 | 0.9 | 0.9 | 0.9 | IPF690.5F | 17607238..NADH dehydrogenase orf19.7590         | 690 IPF692      | No significant S.c. match                                                           |
| CA5991 | 1.1 | 0.9 | 1.0 | IPF690.3F | 17607789..NADH dehydrogenase orf19.7591         | 689 IPF690.5F   | No significant S.c. match                                                           |
| CA5992 | 1.3 | 1.2 | 0.6 | FAA4      | 17613862..long-chain fatty acid--Corf19.7592    | 20033 IPF690.3F | No significant S.c. match                                                           |
| CA5993 | 0.9 | 1.1 | 1.1 | ASP1      | complemer L-asparaginase (by ho orf19.7593      | 679 CaFAA4      | Lipid fatty-ε ligase activity                                                       |
| CA5994 | 1.0 | 0.9 | 1.0 | IPF677    | 17618102..unknown function orf19.7594           | 677 CaASP1      | Amino acid hydrolase activity                                                       |
| CA5995 | 1.1 | 1.2 | 1.0 | IPF676    | complemer unknown function orf19.7595           | 676 IPF677      | No significant S.c. match                                                           |
| CA5996 | 1.0 | 1.0 | 1.0 | IPF673    | 17620784..unknown function orf19.7596           | 673 IPF676      | No significant S.c. match                                                           |
| CA5998 | 0.9 | 0.9 | 1.0 | IPF670    | 17622301..unknown function orf19.7598           | 670 IPF673      | ENERGY                                                                              |
| CA5999 | 1.0 | 0.9 | 1.1 | IPF668    | 17625718..unknown function orf19.7599           | 668 IPF670      | PROTEIN Imolecular_function unknown                                                 |
| CA6000 | 1.4 | 1.6 | 1.4 | FDH11.3   | complemer glutathione-dependent orf19.7600      | 666 IPF668      | UNCLASSIRNA binding                                                                 |
| CA6001 | 1.0 | 1.0 | 1.1 | IPF662    | 17629811..unknown function orf19.7601           | 662 CaFDH11.    | C-compour oxidoreductase activity                                                   |
| CA6002 | 0.9 | 1.0 | 1.0 | IPF661    | complemer unknown function orf19.7602           | 661 IPF662      | UNCLASSItransferase activity                                                        |
| CA6003 | 1.0 | 1.0 | 1.0 | IPF660    | 17632391..unknown function orf19.7603           | 660 IPF661      | UNCLASSIenzyme regulator activity                                                   |
| CA6005 | 1.0 | 1.1 | 1.1 | PUP1      | complemer 20S proteasom ebeta2 orf19.7605       | 654 IPF660      | UNCLASSImolecular_function unknown                                                  |
| CA6006 | 0.9 | 0.8 | 1.0 | IPF652    | 17638868..unknown function orf19.7606           | 652 CaPUP1      | PROTEIN Ipeptidase activity                                                         |
| CA6007 | 1.0 | 0.9 | 1.0 | IPF650    | 17640920..unknown function orf19.7608           | 650 IPF652      | No significant S.c. match                                                           |
| CA6008 | 1.0 | 4.2 | 1.0 | IPF647    | 17642972..unknown function orf19.7609           | 647 IPF650      | No significant S.c. match                                                           |
| CA6009 | 1.4 | 1.6 | 1.9 | IPF643    | 17648191..similar to Saccharomy orf19.7610      | 643 IPF647      | No significant S.c. match                                                           |
| CA6010 | 1.1 | 1.3 | 1.0 | TRX1      | complemer thioredoxin (by homolo orf19.7611     | 640 IPF643      | CELL CYC protein phosphatase activity                                               |
| CA6011 | 1.1 | 1.2 | 1.0 | CTM1      | complemer cytochrome c methyltr:orf19.7612      | 639 CaTRX1      | CELL CYC oxidoreductase activity                                                    |
| CA6012 | 1.1 | 1.4 | 1.0 | HCR1      | 17655504..putative translation init orf19.7613  | 638 CaCTM1      | PROTEIN Itransferase activity                                                       |
| CA6013 | 1.0 | 1.0 | 1.0 | IPF635    | complemer unknown function orf19.7614           | 635 CaHCR1      | TRANSCR translation regulator activity                                              |
| CA6014 | 1.0 | 1.0 | 1.1 | TRS31     | 17657803..targeting complex (TR:orf19.7615      | 634 IPF635      | No significant S.c. match                                                           |
| CA6015 | 1.1 | 1.0 | 1.0 | ARD1      | 17658711..protein N-acetyltransfe orf19.7617    | 631 CaTRS31     | CELLULAF molecular_function unknown                                                 |
| CA6016 | 1.1 | 1.1 | 1.0 | IPF630    | complemer unknown function orf19.7618           | 630 CaARD1      | Lipid fatty-ε transferase activity                                                  |
| CA6017 | 1.0 | 1.0 | 0.9 | IPF629    | 17661145..unknown function orf19.7619           | 629 IPF630      | UNCLASSI chaperone activity                                                         |
| CA6018 | 1.1 | 1.1 | 1.1 | IPF627    | complemer unknown function orf19.7620           | 627 IPF629      | UNCLASSIFIED PROTEINS                                                               |
| CA6019 | 0.9 | 1.0 | 0.9 | IPF625    | 17664248..unknown function orf19.7621           | 625 IPF627      | TRANSCR molecular_function unknown                                                  |
| CA6020 | 1.0 | 1.0 | 1.0 | SPT3      | complemer transcription factor orf19.7622       | 624 IPF625      | UNCLASSImolecular_function unknown                                                  |
| CA6021 | 0.9 | 1.0 | 0.9 | BFR2      | complemer involved in protein tran orf19.7624   | 621 CaSPT3      | TRANSCR transcription regulator activity                                            |
| CA6022 | 1.1 | 0.8 | 1.5 | IPF618    | 17670702..GPI-anchored cell surf:orf19.7625     | 618 CaBFR2      | CELLULAF molecular_function unknown                                                 |
| CA6023 | 1.1 | 1.4 | 1.2 | CDC33     | 17671599..translation initiation fac orf19.7626 | 616 IPF618      | No significant S.c. match                                                           |
| CA6024 | 0.8 | 0.7 | 0.9 | IPF615    | complemer unknown function orf19.7627           | 615 CaCDC33     | PROTEIN Itranslation regulator activity                                             |
| CA6025 | 0.9 | 0.9 | 0.9 | IPF614    | 17673364..unknown function orf19.7629           | 614 IPF615      | CELL FATImolecular_function unknown                                                 |
| CA6026 | 1.1 | 1.0 | 1.0 | IPF610    | complemer unknown function orf19.7631           | 610 IPF614      | UNCLASSImolecular_function unknown                                                  |
| CA6027 | 0.9 | 0.9 | 0.9 | IPF609    | 17677515..unknown function orf19.7632           | 609 IPF610      | UNCLASSIDNA binding                                                                 |
| CA6028 | 1.1 | 1.1 | 1.1 | IPF607    | complemer unknown function orf19.7634           | 607 IPF609      | TRANSCRIPTION SUBCELLULAR LOCALISATION                                              |
| CA6029 | 0.9 | 1.0 | 1.0 | DRS1      | 17682130..ATP dependent RNA h orf19.7635        | 603 IPF607      | CELL CYC molecular_function unknown                                                 |
| CA6030 | 1.1 | 1.0 | 1.1 | YHB2      | complemer flavohemoprotein (by h orf19.7637     | 599 CaDRS1      | TRANSCR RNA binding,helicase activity                                               |
| CA6031 | 1.0 | 1.0 | 1.0 | PRO1      | 17687109..glutamate 5-kinase (by orf19.7638     | 597 CaYHB2      | CELL RESCUE DEFENSE AND VIRULENCE ""SUBCELLULAR LOCALISATION                        |
| CA6032 | 1.0 | 1.0 | 1.0 | IPF596    | 17688451..similar to Saccharomy orf19.7642      | 596 CaPRO1      | Amino acid transferase activity                                                     |
| CA6033 | 1.1 | 1.4 | 1.2 | COQ2      | complemer para-hydroxybenzoate orf19.7643       | 592 IPF596      | PROTEIN Imolecular_function unknown                                                 |
| CA6034 | 1.1 | 1.0 | 1.2 | APC11     | complemer subunit of the anaphas orf19.7644     | 590 CaCOQ2      | Metabolisr transporter activity                                                     |
| CA6035 | 1.0 | 1.1 | 1.0 | BPL1      | complemer biotin holocarboxylase orf19.7645     | 589 CaAPC11     | CELL CYC protein binding                                                            |
| CA6036 | 1.1 | 1.1 | 1.1 | IPF585    | 17694470..unknown function orf19.7646           | 585 CaBPL1      | Metabolisr ligase activity                                                          |
| CA6037 | 0.9 | 0.9 | 0.9 | ERC4      | 17695567..ethionine resistance pr orf19.7648    | 582 IPF585      | UNCLASSImolecular_function unknown                                                  |
| CA6038 | 0.8 | 0.9 | 0.9 | LTV1      | 17697084..low-temperature viabili orf19.7650    | 579 CaERC4      | UNCLASSIFIED PROTEINS                                                               |
| CA6039 | 1.0 | 0.9 | 1.0 | CKA1      | 17698544..casein kinase II, cataly orf19.7652   | 576 CaLTV1      | CELL RES molecular_function unknown                                                 |
| CA6040 | 1.0 | 0.9 | 0.8 | CPR6      | 17700062..cyclophylin (by homolo orf19.7654     | 574 CaCKA1      | CELL CYC protein kinase activity                                                    |
| CA6041 | 1.2 | 1.3 | 1.1 | RPO21     | 17701754..DNA-directed RNA pol orf19.7655       | 572 CaCPR6      | TRANSCR chaperone activity                                                          |
| CA6042 | 1.0 | 1.0 | 1.0 | IPF4924   | 17707077..unknown function orf19.7657           | 4924 CaRPO21    | TRANSCR nucleotidyltransferase activity                                             |
| CA6043 | 0.9 | 0.8 | 1.0 | RFC4      | 17707814..DNA replication factor orf19.7658     | 4926 IPF4924    | TRANSCR RNA binding                                                                 |
| CA6044 | 1.0 | 0.9 | 1.0 | IPF4928   | complemer similar to Saccharomy orf19.7660      | 4928 CaRFC4     | CELL CYC DNA binding                                                                |
| CA6045 | 1.0 | 0.9 | 1.0 | IPF4929   | 17710477..similar to Saccharomy orf19.7661      | 4929 IPF4928    | CELLULAF protein binding                                                            |
| CA6046 | 0.9 | 1.0 | 1.0 | IPF4931   | complemer unknown function orf19.7662           | 4931 IPF4929    | CELL CYC DNA binding,helicase activity                                              |
| CA6047 | 1.0 | 1.1 | 1.0 | IPF4933   | 17713493..unknown function orf19.7663           | 4933 IPF4931    | TRANSPOMolecular_function unknown                                                   |
| CA6048 | 0.9 | 0.9 | 0.9 | IPF4934   | complemer unknown function orf19.7664           | 4934 IPF4933    | CELL CYC molecular_function unknown                                                 |
| CA6049 | 0.9 | 1.0 | 0.9 | IPF4935   | complemer unknown function orf19.7665           | 4935 IPF4934    | TRANSCR molecular_function unknown                                                  |
| CA6050 | 1.0 | 0.9 | 0.9 | IPF4939   | 17715579..similar to Saccharomy orf19.7666      | 4939 IPF4935    | UNCLASSImolecular_function unknown                                                  |
| CA6051 | 1.0 | 1.1 | 1.0 | IPF4940   | complemer unknown function orf19.7667           | 4940 IPF4939    | TRANSPORT FACILITATION                                                              |
| CA6052 | 0.8 | 0.9 | 0.8 | IPF4942   | 17718141..similar to Saccharomy orf19.7668      | 4942 IPF4940    | C-compour hydrolase activity                                                        |
| CA6053 | 1.2 | 1.1 | 1.0 | IPF4949   | complemer unknown function orf19.7670           | 4949 IPF4942    | C-compour hydrolase activity                                                        |
| CA6054 | 1.0 | 1.0 | 1.2 | IPF4952   | complemer unknown function orf19.7672           | 4952 IPF4949    | UNCLASSImolecular_function unknown                                                  |
| CA6055 | 1.1 | 1.0 | 1.1 | SMD1      | 17723811..snRNA-associated pro orf19.7673       | 4953 IPF4952    | UNCLASSImolecular_function unknown                                                  |
| CA6056 | 1.1 | 0.8 | 1.8 | IPF4955   | complemer similar to Saccharomy orf19.7675      | 4955 CaSMD1     | TRANSCRIPTION SUBCELLULAR LOCALISATION                                              |
| CA6057 | 2.4 | 3.4 | 1.5 | IPF4959   | complemer D-xylulose reductase ( orf19.7676     | 4959 IPF4955    | No signific: structural molecule activity                                           |

|        |     |     |     |           |                                               |            |       |           |                                                                                                                           |
|--------|-----|-----|-----|-----------|-----------------------------------------------|------------|-------|-----------|---------------------------------------------------------------------------------------------------------------------------|
| CA6058 | 1.0 | 1.5 | 0.9 | ATP16     | complemer F1F0-ATPase comple                  | orf19.7678 | 4961  | IPF4959   | C-compour oxidoreductase activity                                                                                         |
| CA6059 | 1.0 | 1.1 | 1.0 | CTA26     | complemer transcriptional activator           | orf19.7680 | 20034 | CaATP16   | ENERGY C transporter activity                                                                                             |
| CA6060 | 1.1 | 1.1 | 1.0 | IPF8301   | 17728176..unknown function                    | orf19.6008 | 8301  | CaCTA26   | No significant S.c. match                                                                                                 |
| CA6061 | 1.1 | 0.9 | 1.0 | IPF8302   | 17732246..unknown function                    | orf19.6007 | 8302  | IPF8301   | UNCLASSI molecular_function unknown                                                                                       |
| CA6062 | 1.0 | 1.1 | 1.0 | IPF8307   | 17734108..putative permease (by               | orf19.6005 | 8307  | IPF8302   | Lipid fatty-acid and isoprenoid metabolism                                                                                |
| CA6063 | 1.0 | 0.8 | 0.9 | IPF8311   | 17738610..unknown function                    | orf19.6003 | 8311  | IPF8307   | C-compound and carbohydrate metabolism SUBCELLULAR LOCALISATION TRANSPORT FACILITATION                                    |
| CA6064 | 1.1 | 1.4 | 1.1 | RPL81     | 17740884..60S ribosomal protein               | orf19.6002 | 8312  | IPF8311   | UNCLASSI molecular_function unknown                                                                                       |
| CA6065 | 1.0 | 1.0 | 0.9 | SAP3      | complemer secreted aspartyl prote             | orf19.6001 | 8313  | CaRPL81   | PROTEIN †structural molecule activity                                                                                     |
| CA6066 | 0.7 | 1.1 | 0.5 | CDR1      | complemer multidrug resistance pr             | orf19.6000 | 9739  | CaSAP3    | PROTEIN FATE [folding modification destination] ""Other virulence attributes                                              |
| CA6067 | 1.0 | 1.1 | 1.0 | DYN1      | 17751047..dynein heavy chain, cy              | orf19.5999 | 19819 | CaCDR1    | Lipid fatty-ε transporter activity                                                                                        |
| CA6068 | 2.3 | 1.2 | 1.7 | RPS19A.3  | complemer ribosomal protein S19.e,            | 3-prime e  | 4849  | CaDYN1    | CELL CYC motor activity                                                                                                   |
| CA6069 | 1.0 | 1.0 | 1.0 | IPF4847   | 17766009..unknown function                    | orf19.5995 | 4847  | CaRPS19A  | PROTEIN †structural molecule activity                                                                                     |
| CA6070 | 0.9 | 1.0 | 1.1 | IPF4842   | complemer similar to Saccharomy               | orf19.5994 | 4842  | IPF4847   | UNCLASSI peptidase activity                                                                                               |
| CA6071 | 1.0 | 1.0 | 1.0 | IPF4835   | complemer zinc finger protein (by             | orf19.5992 | 4835  | IPF4842   | CELLULAF hydrolase activity                                                                                               |
| CA6072 | 0.9 | 0.9 | 1.0 | DBP10     | 17787135..Putative ATP-depende                | orf19.5991 | 6     | IPF4835   | Amino acid metabolism TRANSCRIPTION SUBCELLULAR LOCALISATION UNCLASSIFIED PROTEINS                                        |
| CA6073 | 0.9 | 1.0 | 1.1 | HRP1      | complemer Nuclear polyadenylate               | orf19.5989 | 9     | CaDBP10   | TRANSCR RNA binding,helicase activity                                                                                     |
| CA6074 | 0.8 | 0.6 | 0.9 | IPF11     | 17792199..unknown function                    | orf19.5987 | 11    | CaHRP1    | TRANSCR RNA binding                                                                                                       |
| CA6075 | 0.9 | 0.9 | 1.0 | THI4      | 17793918..Thiazole biosynthetic e             | orf19.5986 | 14    | IPF11     | UNCLASSI transferase activity                                                                                             |
| CA6076 | 1.0 | 1.1 | 1.1 | PAC10.3   | 17795269..Non-native Actin Bindii             | orf19.5985 | 15    | CaTHI4    | Metabolismr molecular_function unknown                                                                                    |
| CA6077 | 1.0 | 1.0 | 1.1 | IPF16     | complemer unknown function                    | orf19.5984 | 16    | CaPAC10.3 | CELL CYC protein binding                                                                                                  |
| CA6079 | 0.8 | 1.5 | 1.3 | RPL18.EXI | 17797253..Ribosomal Protein RPl               | orf19.5982 | 20    | IPF16     | UNCLASSI molecular_function unknown                                                                                       |
| CA6080 | 1.2 | 1.1 | 1.1 | IPF21     | 17798643..unknown function                    | orf19.5980 | 21    | CaRPL18.ε | PROTEIN †structural molecule activity                                                                                     |
| CA6081 | 0.8 | 0.7 | 1.0 | IPF24     | complemer reductase (by homolog               | orf19.5978 | 24    | IPF21     | UNCLASSIFIED PROTEINS                                                                                                     |
| CA6082 | 1.0 | 1.0 | 1.0 | CEM1      | complemer 3-oxoacyl-acyl-carrier-             | orf19.5977 | 25    | IPF24     | UNCLASSIFIED PROTEINS                                                                                                     |
| CA6083 | 0.9 | 0.9 | 0.9 | IPF26     | complemer unknown function                    | orf19.5976 | 26    | CaCEM1    | Lipid fatty-ε transferase activity                                                                                        |
| CA6084 | 0.6 | 0.7 | 0.4 | IPF29     | complemer zinc finger protein (by             | orf19.5975 | 29    | IPF26     | UNCLASSI molecular_function unknown                                                                                       |
| CA6085 | 1.0 | 1.0 | 0.9 | IPF32     | 17809845..similar to Saccharomy               | orf19.5974 | 32    | IPF29     | C-compound and carbohydrate metabolism TRANSCRIPTION SUBCELLULAR LOCALISATION                                             |
| CA6086 | 0.9 | 1.2 | 1.0 | PHB2      | complemer Mitochondrial protein,              | orf19.5973 | 33    | IPF32     | SUBCELLL molecular_function unknown                                                                                       |
| CA6087 | 1.0 | 1.0 | 1.1 | YHV1      | complemer unknown function                    | orf19.5971 | 36    | CaPHB2    | CELL CYC molecular_function unknown                                                                                       |
| CA6088 | 1.0 | 0.9 | 1.0 | HPR5      | 17816175..ATP-dependent DNA †                 | orf19.5970 | 37    | CaYHV1    | UNCLASSI molecular_function unknown                                                                                       |
| CA6089 | 1.0 | 1.0 | 1.1 | RDI1      | complemer Rho GDP dissociation                | orf19.5968 | 40    | CaHPR5    | CELL CYC DNA binding,helicase activity                                                                                    |
| CA6090 | 1.0 | 0.9 | 1.0 | IPF44     | complemer unknown function                    | orf19.5967 | 44    | CaRDI1    | CELL FATI signal transducer activity                                                                                      |
| CA6091 | 0.8 | 1.0 | 0.8 | UFD2      | 17822692..Ubiquitin fusion degrad             | orf19.5965 | 46    | IPF44     | UNCLASSI molecular_function unknown                                                                                       |
| CA6092 | 1.9 | 2.6 | 1.6 | RPL35.3   | complemer Ribosomal protein L35A,             | 3-prime ε  | 47    | CaUFD2    | PROTEIN FATE [folding modification destination]                                                                           |
| CA6093 | 1.7 | 1.8 | 1.3 | ARF22     | complemer GTP-binding protein of              | orf19.5964 | 50    | CaRPL35.3 | PROTEIN †structural molecule activity                                                                                     |
| CA6094 | 1.0 | 1.0 | 1.0 | IPF53     | complemer unknown function                    | orf19.5963 | 53    | CaARF22   | PROTEIN †hydrolase activity                                                                                               |
| CA6095 | 1.0 | 0.9 | 1.0 | SNF3      | 17831851..High affinity glucose tr            | orf19.5962 | 55    | IPF53     | UNCLASSI molecular_function unknown                                                                                       |
| CA6096 | 0.5 | 0.5 | 0.6 | IPF56     | 17834497..similar to Saccharomy               | orf19.5961 | 56    | CaSNF3    | C-compour signal transducer activity                                                                                      |
| CA6097 | 2.4 | 2.1 | 1.3 | NCE102    | 17837654..secretion of proteins th            | orf19.5960 | 59    | IPF56     | PROTEIN †molecular_function unknown                                                                                       |
| CA6098 | 1.0 | 1.1 | 1.0 | IPF61     | complemer unknown function                    | orf19.5959 | 61    | CaNCE102  | CELLULAF molecular_function unknown                                                                                       |
| CA6099 | 1.1 | 0.9 | 1.0 | CDR2      | complemer Candida albicans drug               | orf19.5958 | 63    | IPF61     | PROTEIN †RNA binding                                                                                                      |
| CA6100 | 1.2 | 1.2 | 1.4 | IPF66     | complemer unknown function                    | orf19.5956 | 66    | CaCDR2    | Lipid fatty-acid and isoprenoid metabolism """"CELL RESCUE DEFENSE AND VIRULENCE ""REGULATION OF/INTERACTION WITH CE      |
| CA6101 | 1.0 | 1.0 | 1.0 | SPO70.3F  | complemer involved in meiosis and sporulation | orf19.5954 | 68    | IPF66     | UNCLASSI molecular_function unknown                                                                                       |
| CA6102 | 1.1 | 1.0 | 1.1 | SPO70.5F  | complemer involved in meiosis anc             | orf19.5954 | 70    | CaSPO70.3 | CELL CYCLE AND DNA PROCESSING ""PROTEIN FATE [folding modification destination] ""SUBCELLULAR LOCALISATION                |
| CA6103 | 0.9 | 0.9 | 1.0 | SFP1      | complemer zinc finger protein (by             | orf19.5953 | 72    | CaSPO70.5 | CELL FATI molecular_function unknown                                                                                      |
| CA6104 | 1.0 | 1.0 | 1.0 | IPF65     | 17856243..unknown function                    | orf19.5952 | 75    | CaSFP1    | CELL CYC DNA binding,transcription regulator activity                                                                     |
| CA6105 | 0.9 | 1.0 | 0.9 | FAS2.5F   | 17858538..fatty-acyl-CoA synthas              | orf19.5951 | 76    | IPF65     | UNCLASSIFIED PROTEINS                                                                                                     |
| CA6106 | 1.5 | 1.2 | 1.0 | FAS2.53F  | 17860953..fatty-acyl-CoA synthase, alpha ch   | orf19.5949 | 77    | CaFAS2.5f | Lipid fatty-acid and isoprenoid metabolism """"PROTEIN FATE [folding modification destination] ""SUBCELLULAR LOCALISATION |
| CA6107 | 1.3 | 1.6 | 1.4 | FAS2.3F   | 17861433..fatty-acyl-CoA synthas              | orf19.5949 | 80    | CaFAS2.5f | Lipid fatty-acid and isoprenoid metabolism """"PROTEIN FATE [folding modification destination] ""SUBCELLULAR LOCALISATION |
| CA6108 | 1.1 | 1.3 | 1.0 | SEC7      | 17864532..Guanine nucleotide ex               | orf19.5947 | 85    | CaFAS2.3f | Lipid fatty-ε oxidoreductase activity,transferase activity                                                                |
| CA6109 | 1.0 | 1.8 | 0.9 | IPF89.3   | 17870899..unknown function, 3-prime end       | orf19.5943 | 89    | CaSEC7    | CELLULAF enzyme regulator activity                                                                                        |
| CA6110 | 0.9 | 0.8 | 0.9 | IPF91     | 17872156..unknown function                    | orf19.5943 | 91    | IPF89.3   | C-compour DNA binding                                                                                                     |
| CA6111 | 1.0 | 1.0 | 1.1 | IPF96     | complemer C3HC4 type zinc finge               | orf19.5942 | 96    | IPF91     | UNCLASSI molecular_function unknown                                                                                       |
| CA6112 | 1.0 | 1.2 | 1.0 | IPF97     | 17875727..unknown function                    | orf19.5941 | 97    | IPF96     | UNCLASSI molecular_function unknown                                                                                       |
| CA6113 | 1.0 | 1.0 | 1.0 | IPF100.3  | 17877348..zinc finger protein, 3-pi           | orf19.5940 | 100   | IPF97     | CELLULAF molecular_function unknown                                                                                       |
| CA6114 | 1.0 | 1.0 | 1.0 | SEN1      | 17879931..positive effector of tRN            | orf19.5938 | 110   | IPF100.3  | Amino acid metabolism TRANSCRIPTION SUBCELLULAR LOCALISATION UNCLASSIFIED PROTEINS                                        |
| CA6115 | 1.0 | 0.9 | 0.9 | IPF112    | complemer unknown function                    | orf19.5935 | 112   | CaSEN1    | TRANSCR RNA binding,helicase activity                                                                                     |
| CA6116 | 1.0 | 1.0 | 1.0 | TOP3      | 17888645..DNA topoisomerase III               | orf19.5934 | 116   | IPF112    | CELL CYCLE AND DNA PROCESSING SUBCELLULAR LOCALISATION                                                                    |
| CA6117 | 0.9 | 0.8 | 1.0 | IPF122    | 17893301..unknown function                    | orf19.5933 | 122   | CaTOP3    | CELL CYC isomerase activity                                                                                               |
| CA6118 | 1.1 | 1.0 | 1.1 | IPF126    | 17895351..unknown function                    | orf19.5932 | 126   | IPF122    | No significant S.c. match                                                                                                 |
| CA6119 | 1.1 | 1.0 | 1.1 | ARV1      | complemer involved in sterol uptak            | orf19.5931 | 128   | IPF126    | UNCLASSI molecular_function unknown                                                                                       |
| CA6120 | 1.0 | 1.0 | 0.9 | IPF132    | complemer unknown function                    | orf19.5930 | 132   | CaARV1    | SUBCELLL molecular_function unknown                                                                                       |
| CA6121 | 1.0 | 1.1 | 1.1 | IPF33     | 17900332..unknown function                    | orf19.5929 | 133   | IPF132    | TRANSCRIPTION CELLULAR TRANSPORT AND TRANSPORT MECHANISMS SUBCELLULAR LOCALISATION                                        |
| CA6122 | 2.4 | 1.3 | 1.3 | RPP2B     | complemer acidic ribosomal protei             | orf19.5928 | 134   | IPF33     | No significant S.c. match                                                                                                 |
| CA6123 | 1.4 | 1.3 | 1.5 | RPS15.3   | 17902660..40S ribosomal protein               | orf19.5927 | 135   | CaRPP2B   | PROTEIN †structural molecule activity                                                                                     |
| CA6124 | 1.0 | 1.1 | 1.0 | ARG11     | 17903567..mitochondrial amino ac              | orf19.5926 | 137   | CaRPS15.3 | PROTEIN †structural molecule activity                                                                                     |
| CA6125 | 0.8 | 0.9 | 0.8 | IPF138    | complemer unknown function                    | orf19.5925 | 138   | CaARG11   | Amino acid transporter activity                                                                                           |
| CA6126 | 0.9 | 1.0 | 1.0 | IPF143    | complemer unknown function                    | orf19.5924 | 143   | IPF138    | UNCLASSI molecular_function unknown                                                                                       |
| CA6127 | 0.9 | 0.9 | 0.8 | IPF149    | complemer peroxisomal membrani                | orf19.5921 | 149   | IPF143    | TRANSCRIPTION ""CELL RESCUE DEFENSE AND VIRULENCE ""SUBCELLULAR LOCALISATION                                              |
| CA6128 | 1.0 | 0.9 | 1.0 | IPF152    | complemer unknown function                    | orf19.5919 | 152   | IPF149    | CELLULAR TRANSPORT AND TRANSPORT MECHANISMS TRANSPORT FACILITATION                                                        |
| CA6129 | 1.2 | 1.0 | 1.1 | YRA1.EXO  | complemer RNA annealing protein, exon 2 (by   | orf19.5917 | 155   | IPF152    | UNCLASSI molecular_function unknown                                                                                       |
| CA6131 | 1.1 | 1.1 | 1.0 | IPF4369   | complemer similar to Saccharomy               | orf19.5917 | 4369  | CaYRA1.e  | TRANSCR molecular_function unknown                                                                                        |

|        |     |     |     |            |                                               |       |            |                                                                                                                  |
|--------|-----|-----|-----|------------|-----------------------------------------------|-------|------------|------------------------------------------------------------------------------------------------------------------|
| CA6132 | 1.0 | 1.0 | 1.0 | DUR35.5F   | 17927011..Urea transport protein, orf19.5916  | 4365  | IPF4369    | TRANSCRIPTION                                                                                                    |
| CA6133 | 0.9 | 0.9 | 0.9 | DUR35.3F   | 17927715..Urea transport protein, orf19.5915  | 4364  | CaDUR35.   | REGULATION OF/INTERACTION WITH CELLULAR ENVIRONMENT SUBCELLULAR LOCALISATION TRANSPORT FACILITATION              |
| CA6134 | 1.0 | 1.0 | 1.0 | MAK21      | complemer Ribosome biogenesis  orf19.5912     | 4362  | CaDUR35.   | REGULATION OF/INTERACTION WITH CELLULAR ENVIRONMENT SUBCELLULAR LOCALISATION TRANSPORT FACILITATION              |
| CA6135 | 1.0 | 1.0 | 1.0 | CMK1       | 17933003..Ca2+/calmodulin-depe orf19.5911     | 4358  | CaMAK21    | PROTEIN  molecular_function unknown                                                                              |
| CA6137 | 1.0 | 0.9 | 1.0 | IPF4356    | complemer unknown function orf19.5910         | 4356  | CaCMK1     | CELLULAR COMMUNICATION/SIGNAL TRANSDUCTION MECHANISM CELL FATE SUBCELLULAR LOCALISATION                          |
| CA6138 | 1.2 | 1.3 | 1.0 | IPF4351    | 17942827..unknown function orf19.5908         | 4351  | IPF4356    | TRANSCR molecular_function unknown                                                                               |
| CA6139 | 0.9 | 1.0 | 0.9 | ADE2       | 17949698..phosphoribosylaminoir orf19.5906    | 1883  | IPF4351    | TRANSCR transcription regulator activity                                                                         |
| CA6140 | 1.0 | 1.0 | 1.0 | IPF1882    | complemer unknown function orf19.5905         | 1882  | CaADE2     | Nucleotide lyase activity                                                                                        |
| CA6141 | 2.3 | 3.1 | 1.6 | RPL19A.3   | 17952958..Ribosomal protein L19 orf19.5904    | 1881  | IPF1882    | CELL FAT molecular_function unknown                                                                              |
| CA6142 | 1.0 | 1.0 | 1.0 | IPF1879    | complemer unknown function orf19.5903         | 1879  | CaRPL19A   | PROTEIN  structural molecule activity                                                                            |
| CA6143 | 1.1 | 1.0 | 0.9 | IPF1873    | 17959419..putative GTP-binding f orf19.5902   | 1873  | IPF1879    | SUBCELL  molecular_function unknown                                                                              |
| CA6144 | 1.0 | 1.1 | 1.1 | PKC1       | complemer Ser/thr protein kinase  orf19.5901  | 1872  | IPF1873    | Nucleotide metabolism C-compound and carbohydrate metabolism CELL CYCLE AND DNA PROCESSING CELLULAR COMMUNICATIO |
| CA6145 | 1.0 | 1.0 | 1.0 | IPF1869    | complemer unknown function orf19.5897         | 1869  | CaPKC1     | CELL CYC protein kinase activity                                                                                 |
| CA6146 | 1.1 | 1.0 | 1.0 | IPF1863    | 17968356..unknown function orf19.5896         | 1863  | IPF1869    | UNCLASSI  molecular_function unknown                                                                             |
| CA6147 | 1.1 | 0.9 | 1.0 | IPF1862.5f | 17969397..unknown function, 5-pr orf19.5895   | 1862  | IPF1863    | ENERGY   molecular_function unknown                                                                              |
| CA6148 | 1.1 | 1.1 | 1.1 | IPF1862.3f | 17969860..unknown function, 3-pr orf19.5894   | 1861  | IPF1862.5f | UNCLASSIFIED PROTEINS                                                                                            |
| CA6149 | 0.9 | 0.9 | 0.7 | RIP1       | complemer Ubiquinol cytochrome- orf19.5893    | 1859  | IPF1862.3f | UNCLASSI  molecular_function unknown                                                                             |
| CA6150 | 1.0 | 1.2 | 0.9 | IPF1857    | complemer similar to Saccharomyc orf19.5892   | 1857  | CARIP1     | ENERGY  transporter activity, oxidoreductase activity                                                            |
| CA6151 | 0.8 | 0.8 | 0.9 | IPF1853    | 17975894..unknown function orf19.5890         | 1853  | IPF1857    | TRANSCR ligase activity                                                                                          |
| CA6152 | 1.0 | 0.9 | 1.1 | NUP85      | 17979392..Nuclear pore protein (t orf19.5887  | 1850  | IPF1853    | No significant S.c. match                                                                                        |
| CA6153 | 1.0 | 1.2 | 1.0 | CUP5       | complemer Vacuolar H+-ATPase ( orf19.5886     | 1849  | CaNUP85    | TRANSCR structural molecule activity                                                                             |
| CA6154 | 0.8 | 0.8 | 0.9 | IPF1848    | 17983285..similar to Saccharomyc orf19.5885   | 1848  | CaCUP5     | CELLULAR TRANSPORT AND TRANSPORT MECHANISMS ""CELL RESCUE DEFENSE AND VIRULENCE ""REGULATION OF/INTER.           |
| CA6155 | 0.9 | 0.9 | 1.0 | IPF1846    | 17983986..unknown function orf19.5884         | 1846  | IPF1848    | TRANSCR RNA binding                                                                                              |
| CA6156 | 0.9 | 0.9 | 0.9 | GEF1.3F    | complemer Voltage-gated chloride orf19.5881   | 1844  | IPF1846    | UNCLASSI  molecular_function unknown                                                                             |
| CA6157 | 1.0 | 0.9 | 1.0 | GEF1.5F    | complemer Voltage-gated chloride orf19.5880   | 1841  | CaGEF1.3f  | CELLULAR TRANSPORT AND TRANSPORT MECHANISMS REGULATION OF/INTERACTION WITH CELLULAR ENVIRONMENT SUB              |
| CA6158 | 1.0 | 0.9 | 0.9 | IPF1839    | 17990466..putative 1-Acyl dihydro orf19.5879  | 1839  | CaGEF1.5f  | CELLULAF  transporter activity                                                                                   |
| CA6159 | 1.0 | 1.1 | 1.0 | IPF1837    | complemer unknown function orf19.5877         | 1837  | IPF1839    | C-compound and carbohydrate metabolism CELL FATE                                                                 |
| CA6160 | 1.2 | 1.2 | 1.0 | IPF1835    | 17993845..unknown function orf19.5876         | 1835  | IPF1837    | C-compour transferase activity                                                                                   |
| CA6161 | 1.0 | 1.3 | 1.0 | IPF1834    | complemer probable syntaxin (by orf19.5875    | 1834  | IPF1835    | No significant S.c. match                                                                                        |
| CA6162 | 1.0 | 0.9 | 1.0 | IPF1833    | 17995827..similar to opaque phas orf19.5874   | 1833  | IPF1834    | PROTEIN  transporter activity                                                                                    |
| CA6163 | 1.0 | 0.9 | 1.0 | POL1       | 17997165..DNA-directed DNA pol orf19.5873     | 1832  | IPF1833    | No significant S.c. match                                                                                        |
| CA6164 | 1.1 | 1.0 | 1.0 | SNF5.5F    | 18001869..Component of SWI/SN orf19.5872      | 14342 | CaPOL1     | CELL CYC nucleotidyl transferase activity                                                                        |
| CA6165 | 0.4 | 0.3 | 0.8 | SNF5.3F    | 18002327..Component of SWI/SN orf19.5871      | 14343 | CaSNF5.5f  | No significant S.c. match                                                                                        |
| CA6166 | 1.2 | 1.1 | 1.1 | CTP1       | 18007015..Citrate transport protei orf19.1329 | 18048 | CaSNF5.3f  | C-compour transcription regulator activity                                                                       |
|        |     |     |     |            |                                               |       | CaCTP1     | C-compour transporter activity                                                                                   |
