# Supplementary material for: Genome-wide analysis of Candida albicans gene expression patterns during infection of the mammalian kidney
Source: PubMed Central journal article supplement (PMC2698078; doi:10.1016/j.fgb.2008.10.012), 2009-02
Supplement: mmc3.pdf [file mmc3.pdf]

**RPMI Sucrose - 15 mins (UP genes)**

|         |        |             | Rep1 | Rep2 | Rep3 |                                                                  |
|---------|--------|-------------|------|------|------|------------------------------------------------------------------|
| IPF9550 | CA4570 | orf19.6882  | 5.36 | 4.15 | 4.58 | similar to Saccharomyces cerevisiae Osm1p osmotic growth protein |
| RNH1    | CA0277 | orf19.13057 | 5.23 | 4.16 | 4.77 | ribonuclease H (by homology)                                     |
| IPF6629 | CA4127 | orf19.2762  | 5.18 | 5.36 | 5.53 | unknown function                                                 |
| PGI1    | CA3559 | orf19.3888  | 4.43 | 4.96 | 4.17 | Glucose-6-phosphate isomerase                                    |
| IFD1    | CA0840 | orf19.8650  | 4.24 | 3.50 | 3.62 | Putative aryl-alcohol dehydrogenase (by homology)                |

**RPMI Sucrose - 15 mins (DOWN genes)**

|         |        |            |      |      |      |                                                    |
|---------|--------|------------|------|------|------|----------------------------------------------------|
| IPF4764 | CA3938 | orf19.9556 | 0.35 | 0.33 | 0.41 | unknown Function                                   |
| CDR1    | CA6066 | orf19.6000 | 0.31 | 0.24 | 0.28 | multidrug resistance protein (by homology)         |
| SSA4    | CA1230 | orf19.4980 | 0.28 | 0.36 | 0.31 | cahsp70 mRNA for heat shock                        |
| ATP2    | CA4362 | orf19.5653 | 0.26 | 0.25 | 0.27 | F1F0-ATPase complex, F1 beta subunit (by homology) |
| ATP1    | CA4457 | orf19.6854 | 0.17 | 0.22 | 0.19 | F1F0-ATPase complex, F1 alpha subunit, exon 3      |
| CIT1    | CA3909 | orf19.4393 | 0.05 | 0.03 | 0.07 | Citrate synthase, exon 2                           |
| FRP2    | CA3153 | orf19.6169 | 0.03 | 0.02 | 0.04 | related to S. cerevisiae Fun34p                    |

**RPMI Sucrose - 30 mins (UP genes)**

|             |  |  |  |  |  |             |
|-------------|--|--|--|--|--|-------------|
| <b>None</b> |  |  |  |  |  | <i>none</i> |
|-------------|--|--|--|--|--|-------------|

**RPMI Sucrose - 30 mins (DOWN genes)**

|          |        |            |      |      |      |                  |
|----------|--------|------------|------|------|------|------------------|
| IPF4764  | CA3938 | orf19.9556 | 0.46 | 0.47 | 0.44 | unknown Function |
| IPF10595 | CA2362 | orf19.1287 | 0.45 | 0.45 | 0.49 | unknown function |
