# Supplementary material for: Genome-wide analysis of Candida albicans gene expression patterns during infection of the mammalian kidney
Source: PubMed Central journal article supplement (PMC2698078; doi:10.1016/j.fgb.2008.10.012), 2009-02
Supplement: mmc4.pdf [file mmc4.pdf]

All Genes

Regulation of SC5314 genes in rabbit kidney versus SC5314 genes in RPMI 1640

| Kidney | RK1 | RK2 | RK3 | RK4 | Common     | Map        | Description                          | Function    | orf19.# | IPF#  | Name       | MIPS Cate                                                                                                              | GO molecular function          |
|--------|-----|-----|-----|-----|------------|------------|--------------------------------------|-------------|---------|-------|------------|------------------------------------------------------------------------------------------------------------------------|--------------------------------|
| CA0001 | 0.9 | 0.8 | 1.1 | 1.0 | IPF19501   | complemer  | unknown function                     |             |         | 19501 | IPF19501   | No significant S.c. match                                                                                              |                                |
| CA0002 | 1.0 | 1.1 | 1.0 | 1.1 | DOC1       | 23221..246 | component of the ana                 | orf19.12523 |         | 12212 | CaDOC1     | CELL CYC                                                                                                               | enzyme regulator activity      |
| CA0003 | 1.1 | 1.3 | 1.2 | 1.2 | IPF19484   | 31023..322 | putative zinc amino peptidase (by hc |             |         | 19484 | IPF19484   | PROTEIN FATE [folding modification destination]                                                                        |                                |
| CA0005 | 1.3 | 1.1 | 1.0 | 0.7 | IPF14994   | 64471..654 | unknown function                     | orf19.2414  |         | 14994 | IPF14994   | UNCLASSI                                                                                                               | molecular_function unknown     |
| CA0006 | 1.1 | 0.9 | 1.1 | 1.0 | IPF2072    | 78709..797 | unknown function                     | orf19.11561 |         | 2072  | IPF2072    | UNCLASSI                                                                                                               | molecular_function unknown     |
| CA0007 | 1.4 | 1.3 | 1.1 | 1.3 | IPF12061   | complemer  | unknown function                     | orf19.7807  |         | 12061 | IPF12061   | No significant S.c. match                                                                                              |                                |
| CA0008 | 2.0 | 1.8 | 1.7 | 1.2 | IPF12110   | complemer  | 1,4-butanediol diacryla              | orf19.376   |         | 12110 | IPF12110   | No significant S.c. match                                                                                              |                                |
| CA0009 | 1.0 | 1.0 | 1.0 | 1.2 | IPF11382   | complemer  | unknown function                     | orf19.8247  |         | 11382 | IPF11382   | No significant S.c. match                                                                                              |                                |
| CA0010 | 0.8 | 1.0 | 0.8 | 1.2 | IPF16036   | 130706..13 | similar to Saccharomy                | orf19.7790  |         | 16036 | IPF16036   | PROTEIN I                                                                                                              | transporter activity           |
| CA0011 | 1.3 | 1.2 | 0.9 | 0.8 | IPF17430   | complemer  | possible zinc protease               | orf19.73    |         | 17430 | IPF17430   | PROTEIN I                                                                                                              | molecular_function unknown     |
| CA0012 | 1.4 | 1.1 | 1.0 | 1.2 | IPF19448   | 153218..15 | similar to Saccharomy                | orf19.13439 |         | 19448 | IPF19448   | Lipid fatty- $\alpha$                                                                                                  | transferase activity           |
| CA0013 | 1.9 | 1.1 | 1.0 | 0.8 | MAK32      | 164949..16 | sugar kinase (by homo                | orf19.4548  |         | 14749 | CaMAK32    | TRANSPOR                                                                                                               | molecular_function unknown     |
| CA0014 | 0.9 | 1.1 | 1.0 | 0.9 | IPF13368   | complemer  | unknown function                     | orf19.11034 |         | 13368 | IPF13368   | No significant S.c. match                                                                                              |                                |
| CA0015 | 1.0 | 1.0 | 1.0 | 1.2 | PHO87.5E   | 180249..18 | Member of the phosph                 | orf19.9990  |         | 19824 | CaPHO87.   | Phosphate metabolism REGULATION OF/INTERACTION WITH CELLULAR ENVIRONMENT TRANSPORT FACILITATION                        |                                |
| CA0016 | 1.8 | 0.9 | 1.0 | 0.9 | CAN5.5     | 196184..19 | basic-amino-acid permease, 5-prime   |             |         | 14582 | CaCAN5.5   | No significant S.c. match                                                                                              |                                |
| CA0017 | 1.6 | 0.9 | 1.2 | 1.1 | IPF17811   | 208654..20 | unknown function                     |             |         | 17811 | IPF17811   | No significant S.c. match                                                                                              |                                |
| CA0018 | 1.4 | 1.0 | 1.0 | 0.8 | IPF19435   | complemer  | unknown function                     |             |         | 19435 | IPF19435   | No significant S.c. match                                                                                              |                                |
| CA0019 | 0.9 | 0.9 | 1.0 | 1.0 | IPF17799   | 229761..23 | unknown function                     |             |         | 17799 | IPF17799   | UNCLASSI                                                                                                               | molecular_function unknown     |
| CA0020 | 1.4 | 1.0 | 1.0 | 0.8 | IPF7046    | complemer  | unknown function                     | orf19.124   |         | 7046  | IPF7046    | UNCLASSI                                                                                                               | protein binding                |
| CA0021 | 1.0 | 1.1 | 1.1 | 1.1 | IPF19425   | complemer  | unknown function                     | orf19.161   |         | 19425 | IPF19425   | No significant S.c. match                                                                                              |                                |
| CA0022 | 1.4 | 1.0 | 1.0 | 0.8 | IPF19421   | complemer  | unknown function                     | orf19.162   |         | 19421 | IPF19421   | No significant S.c. match                                                                                              |                                |
| CA0023 | 0.9 | 0.9 | 1.2 | 0.9 | IPF6922    | complemer  | unknown function                     | orf19.3788  |         | 6922  | IPF6922    | No significant S.c. match                                                                                              |                                |
| CA0024 | 1.1 | 0.8 | 1.0 | 0.8 | RPC31.5E   | 271877..27 | DNA-directed RNA pol                 | orf19.10349 |         | 14908 | CaRPC31.   | No significant S.c. match                                                                                              |                                |
| CA0025 | 1.1 | 0.9 | 1.0 | 0.9 | IPF17945   | 281103..28 | unknown function                     | orf19.178   |         | 17945 | IPF17945   | No significant S.c. match                                                                                              |                                |
| CA0026 | 1.5 | 2.5 | 1.0 | 1.3 | IPF16843   | complemer  | unknown function                     |             |         | 16843 | IPF16843   | UNCLASSI                                                                                                               | molecular_function unknown     |
| CA0027 | 1.1 | 1.2 | 1.0 | 1.2 | RCL1       | 345150..34 | RNA 3'-terminal phosph               | orf19.1886  |         | 9148  | CaRCL1     | TRANSCR                                                                                                                | molecular_function unknown     |
| CA0028 | 1.1 | 0.9 | 1.0 | 1.1 | IPF15345   | 350274..35 | peptidyl-tRNA-hydrolas               | orf19.1502  |         | 15345 | IPF15345   | No significant S.c. match                                                                                              |                                |
| CA0029 | 1.0 | 1.0 | 1.1 | 1.2 | PET56      | complemer  | ribosomal RNA methyl                 | orf19.182   |         | 13421 | CaPET56    | TRANSCR                                                                                                                | transferase activity           |
| CA0030 | 2.8 | 1.6 | 2.0 | 1.0 | IPF17790   | 367177..36 | unknown function                     | orf19.7710  |         | 17790 | IPF17790   | TRANSCR                                                                                                                | RNA binding                    |
| CA0031 | 0.9 | 1.0 | 1.0 | 1.3 | COX7       | complemer  | Subunit VII of cytochro              | orf19.227   |         | 15250 | CaCOX7     | ENERGY "                                                                                                               | oxidoreductase activity        |
| CA0032 | 1.1 | 0.7 | 0.9 | 1.3 | IPF15248   | complemer  | zinc finger protein (by l            | orf19.229   |         | 15248 | IPF15248   | UNCLASSI                                                                                                               | molecular_function unknown     |
| CA0034 | 1.2 | 0.9 | 1.0 | 0.8 | IPF8016    | complemer  | unknown function                     |             |         | 8016  | IPF8016    | No significant S.c. match                                                                                              |                                |
| CA0035 | 1.2 | 0.9 | 1.0 | 1.3 | PRC3       | 418049..41 | Carboxypeptidase Y pr                | orf19.10011 |         | 7205  | CaPRC3     | PROTEIN I                                                                                                              | peptidase activity             |
| CA0036 | 1.2 | 1.2 | 1.3 | 1.1 | IPF19377   | 437969..43 | unknown function                     | orf19.3336  |         | 19377 | IPF19377   | No significant S.c. match                                                                                              |                                |
| CA0037 | 7.6 | 4.8 | 9.6 | 1.5 | IPF17652   | 443186..44 | reverse transcriptase, "             | orf19.6078  |         | 17652 | IPF17652   | No significant S.c. match                                                                                              |                                |
| CA0038 | 1.4 | 1.1 | 1.2 | 1.3 | CYC1       | 451363..45 | cytochrome-c isoform                 | orf19.1770  |         | 17424 | CaCYC1     | ENERGY $\epsilon$                                                                                                      | transporter activity           |
| CA0039 | 1.0 | 0.9 | 1.1 | 1.0 | IPF3998    | 466972..46 | unknown function                     | orf19.8278  |         | 3998  | IPF3998    | No significant S.c. match                                                                                              |                                |
| CA0040 | 0.8 | 0.8 | 1.1 | 1.0 | IPF15632   | complemer  | unknown function                     | orf19.10973 |         | 15632 | IPF15632   | No significant S.c. match                                                                                              |                                |
| CA0041 | 1.0 | 1.1 | 1.2 | 1.1 | IPF10360   | complemer  | unknown function                     | orf19.3804  |         | 10360 | IPF10360   | UNCLASSI                                                                                                               | molecular_function unknown     |
| CA0043 | 1.7 | 0.9 | 1.2 | 1.0 | HRD1       | 498030..49 | Involved in degradator               | orf19.719   |         | 17505 | CaHRD1     | PROTEIN I                                                                                                              | ligase activity                |
| CA0044 | 1.5 | 1.3 | 1.6 | 1.2 | IPF17347   | complemer  | unknown function                     | orf19.6492  |         | 17347 | IPF17347   | TRANSCRIPTION                                                                                                          |                                |
| CA0045 | 1.1 | 1.1 | 0.8 | 1.2 | IPF8985.5E | complemer  | unknown function, 5-pr               | orf19.1368  |         | 8985  | IPF8985.5E | No significant S.c. match                                                                                              |                                |
| CA0046 | 1.3 | 1.0 | 0.9 | 1.0 | IPF14850   | complemer  | Hypothetical protein                 | orf19.9988  |         | 14850 | IPF14850   | No significant S.c. match                                                                                              |                                |
| CA0047 | 1.7 | 1.1 | 0.9 | 0.9 | PTC2       | 556497..55 | Protein phosphatase ty               | orf19.2538  |         | 17818 | CaPTC2     | CLASSIFI                                                                                                               | protein phosphatase activity   |
| CA0048 | 1.4 | 1.0 | 1.0 | 0.9 | TIF4631    | complemer  | mRNA cap-binding pro                 | orf19.3599  |         | 17394 | CaTIF4631  | PROTEIN I                                                                                                              | translation regulator activity |
| CA0049 | 1.6 | 1.1 | 1.0 | 0.8 | IPF3908    | 586067..58 | unknown function                     | orf19.757   |         | 3908  | IPF3908    | UNCLASSIFIED PROTEINS                                                                                                  |                                |
| CA0050 | 0.4 | 0.9 | 0.4 | 1.0 | CTA25      | 595830..59 | transcriptional activat              | orf19.362   |         | 10947 | CaCTA25    | No significant S.c. match                                                                                              |                                |
| CA0051 | 1.1 | 1.2 | 1.0 | 1.0 | IPF4443    | 607166..60 | unknown function                     | orf19.12177 |         | 4443  | IPF4443    | No significant S.c. match                                                                                              |                                |
| CA0052 | 1.0 | 1.1 | 1.0 | 1.1 | IPF19567   | complemer  | Unknown function                     | orf19.379   |         | 19567 | IPF19567   | UNCLASSI                                                                                                               | molecular_function unknown     |
| CA0053 | 0.9 | 1.0 | 1.0 | 1.2 | IFA16      | 621045..62 | unknown function                     | orf19.380   |         | 19573 | CaIFA16    | Nucleotide metabolism CELL CYCLE AND DNA PROCESSING CELLULAR COMMUNICATION/SIGNAL TRANSDUCTION M                       |                                |
| CA0054 | 0.3 | 0.6 | 0.7 | 0.9 | RIB4.3     | complemer  | 6,7-dimethyl-8-ribitylumazine synth  |             |         | 4908  | CaRIB4.3   | Metabolism                                                                                                             | isomerase activity             |
| CA0055 | 1.6 | 1.9 | 1.2 | 1.1 | IPF12442   | complemer  | unknown function                     | orf19.10917 |         | 12442 | IPF12442   | UNCLASSI                                                                                                               | molecular_function unknown     |
| CA0056 | 1.0 | 0.8 | 1.2 | 1.1 | IPF15839   | complemer  | unknown function                     | orf19.556   |         | 15839 | IPF15839   | No significant S.c. match                                                                                              |                                |
| CA0057 | 0.8 | 1.1 | 1.0 | 0.9 | IPF3767    | complemer  | unknown function                     |             |         | 3767  | IPF3767    | UNCLASSI                                                                                                               | molecular_function unknown     |
| CA0058 | 1.0 | 0.9 | 1.1 | 1.1 | IPF3770    | 691896..69 | similar to Saccharomyces cerevisiae  |             |         | 3770  | IPF3770    | CELL CYCLE AND DNA PROCESSING ""PROTEIN FATE [folding modification destination] ""CELLULAR TRANSPORT AND I             |                                |
| CA0059 | 1.2 | 0.7 | 1.2 | 1.0 | IPF17840   | 694776..69 | unknown function                     | orf19.566   |         | 17840 | IPF17840   | UNCLASSIFIED PROTEINS                                                                                                  |                                |
| CA0060 | 1.2 | 1.0 | 1.0 | 0.9 | IPF13661   | complemer  | unknown function                     | orf19.1699  |         | 13661 | IPF13661   | UNCLASSI                                                                                                               | molecular_function unknown     |
| CA0061 | 0.9 | 0.8 | 1.4 | 1.0 | IPF19315   | complemer  | unknown function, 3-prime end        |             |         | 19316 | IPF19315   | No significant S.c. match                                                                                              |                                |
| CA0062 | 1.1 | 0.9 | 1.0 | 1.0 | IPF19315   | complemer  | unknown function, 5-prime end        |             |         | 19315 | IPF19315   | No significant S.c. match                                                                                              |                                |
| CA0063 | 1.1 | 0.8 | 1.0 | 0.9 | IPF19310   | complemer  | unknown function, 3-prime end        |             |         | 19310 | IPF19310   | No significant S.c. match                                                                                              |                                |
| CA0064 | 0.9 | 0.8 | 1.3 | 0.9 | IPF19308   | complemer  | unknown function, 3-prime end        |             |         | 19308 | IPF19308   | No significant S.c. match                                                                                              |                                |
| CA0066 | 1.3 | 1.0 | 0.9 | 1.1 | IPF15051   | 751455..75 | unknown function                     | orf19.8843  |         | 15051 | IPF15051   | No significant S.c. match                                                                                              |                                |
| CA0067 | 0.8 | 0.9 | 1.1 | 0.9 | IPF13904   | 756390..75 | farnesyl cysteine carb               | orf19.120   |         | 13904 | IPF13904   | Lipid fatty-acid and isoprenoid metabolism """"PROTEIN FATE [folding modification destination] ""SUBCELLULAR LOCALISAT |                                |
| CA0068 | 0.8 | 1.0 | 0.8 | 0.9 | ARC18      | complemer  | subunit of the Arp2/3 c              | orf19.121   |         | 13905 | CaARC18    | CELLULAF                                                                                                               | structural molecule activity   |

|        |     |     |     |     |                                                          |                                                                                                                       |
|--------|-----|-----|-----|-----|----------------------------------------------------------|-----------------------------------------------------------------------------------------------------------------------|
| CA0069 | 1.5 | 1.2 | 1.3 | 0.9 | IPF19295.5767511..76 unknown function, inte orf19.6468   | 19295 IPF19295.5No significant S.c. match                                                                             |
| CA0070 | 2.2 | 1.3 | 1.7 | 1.4 | IPF19295.5768787..77 unknown function, 3-pr orf19.6469   | 19294 IPF19295.5UNCLASSIFIED PROTEINS                                                                                 |
| CA0071 | 1.3 | 0.9 | 1.1 | 0.8 | IPF19290.5complemer unknown function, 3-pr orf19.621     | 19290 IPF19290.5No significant S.c. match                                                                             |
| CA0072 | 0.8 | 1.0 | 1.0 | 1.0 | IPF19283.5complemer unknown function, 3-pr orf19.625     | 19284 IPF19283.5No significant S.c. match                                                                             |
| CA0073 | 1.3 | 1.0 | 1.1 | 0.8 | IPF19283.5complemer unknown function, 5-prime end        | 19283 IPF19283.5No significant S.c. match                                                                             |
| CA0074 | 0.8 | 1.0 | 0.9 | 0.9 | IFD7 786781..78 Putative aryl-alcohol de orf19.629       | 17480 CaIFD7 C-compound and carbohydrate metabolism ENERGY                                                            |
| CA0075 | 1.1 | 0.9 | 0.9 | 1.0 | IFA24.3 789556..79 unknown function, 3-pr orf19.9164     | 17205 CaIFA24.3 UNCLASSIFIED PROTEINS                                                                                 |
| CA0076 | 1.1 | 1.1 | 1.1 | 1.0 | IPF8866 complemer unknown function orf19.4906            | 8866 IPF8866 No significant S.c. match                                                                                |
| CA0077 | 1.0 | 1.1 | 1.0 | 1.1 | IPF1239 801371..80 unknown function                      | 1239 IPF1239 PROTEIN FATE [folding modification destination] ""SUBCELLULAR LOCALISATION                               |
| CA0078 | 0.5 | 0.9 | 0.6 | 0.9 | CTA27 complemer transcriptional activation               | 17380 CaCTA27 No significant S.c. match                                                                               |
| CA0079 | 1.2 | 0.9 | 1.1 | 1.0 | IPF14323 complemer unknown function orf19.4730           | 14323 IPF14323 UNCLASSIMolecular_function unknown                                                                     |
| CA0080 | 0.9 | 1.0 | 1.0 | 1.0 | IPF11378 826422..82 unknown function orf19.632           | 11378 IPF11378 No significant S.c. match                                                                              |
| CA0081 | 1.2 | 1.0 | 0.9 | 1.0 | IPF11379 complemer unknown function orf19.633            | 11379 IPF11379 No significant S.c. match                                                                              |
| CA0083 | 6.0 | 5.3 |     | 2.5 | PHO84 complemer high-affinity inorganic p orf19.655      | 5438 CaPHO84 Phosphate metabolism CELLULAR TRANSPORT AND TRANSPORT MECHANISMS REGULATION OF/INTERACTION WITH          |
| CA0084 | 0.9 | 1.4 | 0.9 | 1.1 | NAB3 complemer polyadenylated RNA-b orf19.12976          | 4338 CaNAB3 TRANSCR molecular_function unknown                                                                        |
| CA0085 | 0.7 | 1.2 | 1.4 | 1.1 | IPF16201 851158..85 unknown function orf19.693           | 16201 IPF16201 No significant S.c. match                                                                              |
| CA0086 | 1.1 | 0.9 | 0.8 | 1.0 | IPF16598 complemer unknown function orf19.7781           | 16598 IPF16598 Lipid fatty-εtransferase activity                                                                      |
| CA0087 | 1.4 | 0.8 |     | 1.2 | SMF11 858028..85 manganese transporte orf19.4690         | 14122 CaSMF11 PROTEIN FATE [folding modification destination] ""CELLULAR TRANSPORT AND TRANSPORT MECHANISMS REGULATIO |
| CA0088 | 0.9 | 1.0 | 1.0 | 1.0 | IPF7349 866183..86 similar to Saccharomy orf19.579       | 7349 IPF7349 Metabolism transferase activity                                                                          |
| CA0089 | 0.8 | 0.9 | 0.7 | 0.9 | MRPL3 complemer ribosomal protein of th orf19.5064       | 19552 CaMRPL3 PROTEIN structural molecule activity                                                                    |
| CA0090 | 1.0 | 1.2 |     | 1.2 | UBP13 875277..87 ubiquitin carboxyl-term orf19.2026      | 4114 CaUBP13 PROTEIN Ipeptidase activity                                                                              |
| CA0092 | 1.4 | 1.1 | 1.0 | 0.8 | IPF8268.3f890368..89 member of the FRP fa orf19.1571     | 8269 IPF8268.3fC-compound and carbohydrate metabolism                                                                 |
| CA0093 | 1.1 | 1.2 | 1.1 | 1.1 | IPF19980.fcomplemer putative lipase (by hor orf19.7747   | 10462 IPF19980.fLipid fatty-acid and isoprenoid metabolism                                                            |
| CA0094 | 0.7 | 1.0 | 1.0 | 1.1 | IPF12819 932035..93 unknown function orf19.3213          | 12819 IPF12819 UNCLASSIFIED PROTEINS                                                                                  |
| CA0095 | 1.6 | 1.0 | 0.9 | 0.9 | ALG11 936850..93 required for asparagin orf19.3468       | 19249 CaALG11 C-compour transferase activity                                                                          |
| CA0096 | 0.6 | 1.0 | 1.1 | 0.9 | IPF13409 complemer unknown function orf19.751            | 13409 IPF13409 UNCLASSIMolecular_function unknown                                                                     |
| CA0097 | 0.7 | 1.0 | 1.1 | 1.1 | IPF13290 949021..94 unknown function orf19.5314          | 13290 IPF13290 PROTEIN SYNTHESIS SUBCELLULAR LOCALISATION                                                             |
| CA0098 | 1.3 | 0.9 | 0.8 | 1.0 | IPF16479 954432..95 unknown function orf19.2319          | 16479 IPF16479 UNCLASSIMolecular_function unknown                                                                     |
| CA0100 | 0.8 | 1.1 | 0.9 | 1.0 | IPF11569 complemer unknown function orf19.7682           | 11569 IPF11569 No significant S.c. match                                                                              |
| CA0101 | 1.4 | 0.9 | 1.0 | 0.9 | IPF10105 complemer RNA polymerase-like ( orf19.232       | 10105 IPF10105 TRANSCR transcription regulator activity                                                               |
| CA0102 | 1.6 | 1.1 | 1.2 | 1.0 | IPF16695 complemer unknown function orf19.736            | 16695 IPF16695 C-compour transcription regulator activity                                                             |
| CA0103 | 2.2 | 1.5 | 1.2 | 1.0 | IPF17515 1017198..1 unknown function orf19.749           | 17515 IPF17515 PROTEIN FATE [folding modification destination] ""CELLULAR TRANSPORT AND TRANSPORT MECHANISMS          |
| CA0104 | 0.3 | 0.6 | 0.2 | 0.9 | RBT4 complemer repressed by TUP1 pr orf19.13583          | 8153 CaRBT4 CELL FATE Hypha-specific                                                                                  |
| CA0105 | 1.3 | 0.9 | 1.0 | 0.8 | IPF17529.5complemer unknown function, 3-pr orf19.786     | 17529 IPF17529.5No significant S.c. match                                                                             |
| CA0106 | 0.6 | 1.1 |     | 1.0 | IPF16308 complemer unknown function orf19.11332          | 16308 IPF16308 No significant S.c. match                                                                              |
| CA0107 | 1.7 | 1.0 | 1.1 | 0.8 | POL3.5EO complemer DNA Polymerase III, 5- orf19.5183     | 17951 CaPOL3.5εCELL CYC nucleotidyltransferase activity                                                               |
| CA0108 | 1.5 | 1.6 | 1.1 | 1.3 | HIK1.5EOC 1035652..1 histidine kinase, 5-prir orf19.5181 | 19235 CaHIK1.5εC-compound and carbohydrate metabolism CELLULAR COMMUNICATION/SIGNAL TRANSDUCTION MECHANISM ""CELL F   |
| CA0109 | 1.3 | 1.2 | 0.9 | 0.8 | IPF13723 complemer unknown function orf19.7892           | 13723 IPF13723 No significant S.c. match                                                                              |
| CA0110 | 2.5 | 2.1 | 2.6 | 1.3 | IPF17190 1043744..1 unknown function orf19.11350         | 17190 IPF17190 No significant S.c. match                                                                              |
| CA0111 | 1.0 | 0.8 | 0.8 | 1.0 | IPF16830 1049792..1 similar to Saccharomy orf19.4151     | 16830 IPF16830 Lipid fatty-εhydrolase activity                                                                        |
| CA0112 | 1.2 | 0.9 | 1.1 | 0.9 | IPF17358 complemer unknown function orf19.5754           | 17358 IPF17358 UNCLASSIMolecular_function unknown                                                                     |
| CA0113 | 1.4 | 0.9 |     | 0.9 | AUT2 1070596..1 anchor protein mediate orf19.9938        | 14934 CaAUT2 PROTEIN Iprotein binding                                                                                 |
| CA0114 | 0.8 | 1.1 | 0.8 | 1.1 | SSU72 1072101..1 suppressor of cs mutar orf19.9939       | 14932 CaSSU72 TRANSCR protein phosphatase activity                                                                    |
| CA0116 | 0.7 | 0.9 | 0.9 | 0.8 | IPF17975 1082630..1 unknown function orf19.915           | 17975 IPF17975 No significant S.c. match                                                                              |
| CA0117 | 1.8 | 1.1 | 1.3 | 0.9 | IPF19231 1085355..1 unknown function orf19.916           | 19231 IPF19231 UNCLASSIMolecular_function unknown                                                                     |
| CA0118 | 1.1 | 1.2 | 1.2 | 1.2 | IPF16430.51088771..1 similar to Saccharomyces cerevisiae | 16430 IPF16430.5ENERGY Stransporter activity,oxidoreductase activity                                                  |
| CA0119 | 1.0 | 1.0 | 1.0 | 1.1 | RMT2 1092915..1 N-delta-arginine methy orf19.920         | 16809 CaRMT2 Amino acid transferase activity                                                                          |
| CA0120 | 1.6 | 1.0 | 1.0 | 0.8 | IPF19593 complemer similar to Saccharomyces cerevisiae   | 19593 IPF19593 PROTEIN Ipeptidase activity                                                                            |
| CA0121 | 1.3 | 0.9 | 0.7 | 1.1 | IPF17048 1104885..1 unknown function orf19.983           | 17048 IPF17048 UNCLASSIMolecular_function unknown                                                                     |
| CA0122 | 0.7 | 1.0 | 1.1 | 1.2 | SNF4 complemer Nuclear regulatory prot orf19.13191       | 6988 CaSNF4 C-compour enzyme regulator activity                                                                       |
| CA0123 | 1.1 | 1.0 | 1.0 | 1.1 | MXR1 1122583..1 methionine sulfoxide re orf19.9576       | 4117 CaMXR1 Amino acid oxidoreductase activity                                                                        |
| CA0124 | 0.8 | 1.1 | 1.0 | 0.9 | RFC5 1123567..1 DNA replication factor orf19.9577        | 4118 CaRFC5 CELL CYC molecular_function unknown                                                                       |
| CA0125 | 0.9 | 1.0 | 1.3 | 0.9 | IPF4119 complemer unknown function orf19.9578            | 4119 IPF4119 No significant S.c. match                                                                                |
| CA0126 | 0.6 | 1.0 | 1.0 | 1.0 | IPF4284 complemer unknown function orf19.8177            | 4284 IPF4284 UNCLASSIMolecular_function unknown                                                                       |
| CA0127 | 0.3 | 0.3 | 0.4 | 0.5 | HXK2.3f complemer hexokinase II, 3-prime orf19.8176      | 4286 CaHXK2.3fC-compour transferase activity                                                                          |
| CA0129 | 0.7 | 1.1 | 1.0 | 0.9 | IPF10495 complemer unknown function orf19.246            | 10495 IPF10495 UNCLASSIMolecular_function unknown                                                                     |
| CA0130 | 0.9 | 0.8 | 0.8 | 0.9 | IPF4470 complemer unknown function orf19.3533            | 4470 IPF4470 UNCLASSIMolecular_function unknown                                                                       |
| CA0131 | 1.4 | 1.0 | 1.0 | 0.8 | IPF13402 complemer unknown function orf19.36             | 13402 IPF13402 UNCLASSIMolecular_function unknown                                                                     |
| CA0132 | 2.1 | 1.4 | 1.3 | 0.9 | SPT10 1160657..1 Transcription regulator orf19.2361      | 16032 CaSPT10 TRANSCR transferase activity                                                                            |
| CA0133 | 0.8 | 1.0 | 1.0 | 0.9 | IPF3746 1166485..1 unknown function orf19.1007           | 3746 IPF3746 TRANSCR transferase activity                                                                             |
| CA0136 | 1.0 | 1.0 | 1.0 | 1.1 | IFH1 complemer Dioxygenase (by homc orf19.9207           | 10444 CaIFH1 CELL RESCUE DEFENSE AND VIRULENCE                                                                        |
| CA0137 | 1.1 | 1.2 |     | 1.1 | SEC232 1186849..1 Component of COPII c orf19.9206        | 10446 CaSEC232 CELLULAR TRANSPORT AND TRANSPORT MECHANISMS SUBCELLULAR LOCALISATION                                   |
| CA0138 | 1.2 | 2.2 |     | 1.4 | INH1 1195101..1 Inhibitor of mitochondrial ATPase        | 7584 CaINH1 No significant S.c. match                                                                                 |
| CA0139 | 0.5 | 1.0 | 0.8 | 1.1 | RUD3 1204769..1 Suppressor of uso1-1 torf19.14182        | 17098 CaRUD3 CELLULAR molecular_function unknown                                                                      |
| CA0140 | 1.5 | 0.9 | 1.0 | 0.7 | MDM1.3 complemer intermediate filament p orf19.10097     | 19597 CaMDM1.3CELL CYC structural molecule activity                                                                   |
| CA0141 | 1.0 | 0.9 | 1.1 | 1.0 | IPF17520.51228742..1 unknown function, inte orf19.1021   | 17520 IPF17520.5No significant S.c. match                                                                             |
| CA0142 | 1.3 | 0.8 | 0.9 | 0.7 | CSL4 1235322..1 Involved in kinetochore orf19.1026       | 17757 CaCSL4 Nucleotide RNA binding                                                                                   |
| CA0143 | 0.9 | 1.1 |     | 0.9 | IPF19195.51265314..1 putative amino acid or orf19.153    | 19195 IPF19195.5Lipid fatty-acid and isoprenoid metabolism ""TRANSPORT FACILITATION                                   |
| CA0144 | 0.9 | 0.9 | 0.8 | 1.1 | IPF19195.51265891..1 putative amino acid or orf19.151    | 17861 IPF19195.5Lipid fatty-εmolecular_function unknown                                                               |
| CA0145 | 0.8 | 1.1 |     | 1.0 | IPF11449 1272911..1 unknown function                     | 11449 IPF11449 No significant S.c. match                                                                              |
| CA0146 | 1.3 | 1.0 | 1.0 | 0.8 | IPF9689 1274376..1 unknown function orf19.11132          | 9689 IPF9689 No significant S.c. match                                                                                |

|        |     |     |     |     |            |                                               |             |       |            |                                                                                                 |
|--------|-----|-----|-----|-----|------------|-----------------------------------------------|-------------|-------|------------|-------------------------------------------------------------------------------------------------|
| CA0147 | 0.8 | 1.1 | 1.1 | 1.1 | IPF9690    | complemer unknown function                    | orf19.11133 | 9690  | IPF9690    | UNCLASSIFIED PROTEINS                                                                           |
| CA0148 | 0.7 | 1.1 | 0.9 | 1.1 | POP1       | 1278472..1 protein component of r             | orf19.2404  | 14929 | CaPOP1     | TRANSCR RNA binding                                                                             |
| CA0149 | 0.9 | 1.2 |     | 1.2 | VPS34      | 1288898..1 1-phosphatidylinositol             | :orf19.6243 | 17276 | CaVPS34    | Lipid fatty-εprotein kinase activity                                                            |
| CA0150 | 1.0 | 0.9 | 1.3 | 1.0 | CDC123     | 1296609..1 similar to Saccharomy              | orf19.10236 | 6404  | CDC123     | CELL CYC molecular_function unknown                                                             |
| CA0151 | 1.0 | 0.9 | 1.2 | 0.9 | IPF15923.ε | complemer unknown function, 5-pr              | orf19.177   | 15923 | IPF15923.ε | CELL CYCLE AND DNA PROCESSING CELL FATE SUBCELLULAR LOCALISATION                                |
| CA0152 | 1.4 | 1.5 | 1.3 | 1.0 | IPF16368.ζ | complemer unknown function, 3-pr              | orf19.254   | 16370 | IPF16368.ζ | No significant S.c. match                                                                       |
| CA0153 | 1.6 | 1.4 | 1.1 | 1.2 | IPF16368.ξ | complemer Unknown function, 5-p               | orf19.255   | 16368 | IPF16368.ξ | No significant S.c. match                                                                       |
| CA0154 | 1.0 | 1.0 | 1.0 | 1.2 | CPH1       | complemer Transcription factor                | orf19.4433  | 5536  | CaCPH1     | TRANSCR DNA binding,transcription regulator activity                                            |
| CA0155 | 0.7 | 1.3 | 1.0 | 1.0 | RPT6       | complemer 26S proteasome regul                | orf19.11075 | 13102 | CaRPT6     | CELL CYC peptidase activity                                                                     |
| CA0156 | 1.3 | 1.5 | 2.3 | 1.3 | SCW1       | 1355380..1 glucanase (by homolog              | orf19.9345  | 15898 | CaSCW1     | CLASSIFIChydrolase activity                                                                     |
| CA0157 | 0.8 | 0.9 | 0.9 | 0.9 | IPF19178.ζ | complemer unknown function, 3-prime end       |             | 19179 | IPF19178.ζ | No significant S.c. match                                                                       |
| CA0158 | 1.4 | 0.9 | 1.0 | 0.8 | IPF19178.ξ | complemer unknown function, 3-pr              | orf19.1073  | 19178 | IPF19178.ξ | No significant S.c. match                                                                       |
| CA0159 | 1.1 | 1.0 | 1.1 | 0.7 | TUB4.3     | complemer gamma-tubulin, 3-prim               | orf19.1238  | 12541 | CaTUB4.3   | CELL CYC structural molecule activity                                                           |
| CA0160 | 1.4 | 1.5 | 1.1 | 1.3 | GAP7.5EO   | complemer general amino acid per              | orf19.10706 | 11171 | CaGAP7.5ε  | Amino acid metabolism CELLULAR TRANSPORT AND TRANSPORT MECHANISMS SUBCELLULAR LOCALISATION TRAN |
| CA0161 | 1.1 | 0.9 | 0.9 | 0.9 | RMS1       | complemer (putative) transcription:           | orf19.10177 | 10588 | CaRMS1     | TRANSCR molecular_function unknown                                                              |
| CA0162 | 0.5 | 0.9 | 0.9 | 1.1 | IPF19168   | complemer unknown function                    | orf19.5616  | 19168 | IPF19168   | No significant S.c. match                                                                       |
| CA0163 | 0.6 | 0.9 | 1.2 | 1.2 | AYR2       | 1387498..1 1-acyl dihydroxyacet               | orf19.5615  | 15021 | CaAYR2     | C-compound and carbohydrate metabolism CELL FATE                                                |
| CA0164 | 1.0 | 0.8 | 0.7 | 1.1 | IPF11694   | complemer similar to Saccharomy               | orf19.4335  | 11694 | IPF11694   | TRANSPO transporter activity                                                                    |
| CA0165 | 1.3 | 1.0 | 0.9 | 0.8 | IPF19165.ζ | complemer unknown function, 3-prime end       |             | 19165 | IPF19165.ζ | No significant S.c. match                                                                       |
| CA0166 | 0.9 | 1.0 | 1.2 | 1.0 | IPF19161.ξ | complemer unknown function, internal fragment |             | 19161 | IPF19161.ξ | No significant S.c. match                                                                       |
| CA0167 | 1.4 | 1.2 | 1.0 | 0.8 | IPF19160   | complemer unknown function                    | orf19.1075  | 19160 | IPF19160   | No significant S.c. match                                                                       |
| CA0169 | 1.0 | 1.0 | 1.1 | 0.9 | RBT7       | complemer repressed by TUP1                   | orf19.10196 | 14885 | CaRBT7     | Nucleotide metabolism                                                                           |
| CA0170 | 0.7 | 1.0 | 0.8 | 0.9 | IPF15959   | 1442925..1 unknown function                   | orf19.11105 | 15959 | IPF15959   | No significant S.c. match                                                                       |
| CA0171 | 0.5 | 0.6 | 0.3 | 0.9 | IPF15957   | complemer unknown function                    |             | 15957 | IPF15957   | No significant S.c. match                                                                       |
| CA0172 | 2.1 | 1.8 | 1.4 | 1.1 | IPF19154   | 1451467..1 unknown function                   | orf19.1126  | 19154 | IPF19154   | No significant S.c. match                                                                       |
| CA0173 | 0.8 | 0.9 | 1.0 | 0.8 | IPF6913    | complemer unknown function                    | orf19.11273 | 6913  | IPF6913    | SUBCELLULAR LOCALISATION                                                                        |
| CA0174 | 1.2 | 1.2 | 0.8 | 1.1 | IPF11182.ζ | 1458377..1 unknown function, 3-prime end      |             | 11182 | IPF11182.ζ | UNCLASSIhydrolase activity                                                                      |
| CA0175 | 1.1 | 1.4 | 1.1 | 1.1 | NPL4       | complemer nuclear protein localize            | orf19.9970  | 19684 | CaNPL4     | PROTEIN I protein binding,structural molecule activity                                          |
| CA0176 | 0.9 | 1.1 | 1.1 | 1.0 | IPF11388   | complemer unknown function                    | orf19.8267  | 11388 | IPF11388   | UNCLASSIDNA binding                                                                             |
| CA0177 | 1.0 | 0.9 | 1.0 | 1.0 | IFL2       | 1473706..1 unknown function                   | orf19.8268  | 20048 | CaIFL2     | CELL RESCUE DEFENSE AND VIRULENCE ""CELL FATE                                                   |
| CA0178 | 1.4 | 1.1 | 1.0 | 0.8 | CDC6       | complemer Cell division control pr            | orf19.12707 | 2017  | CaCDC6     | CELL CYC protein binding                                                                        |
| CA0179 | 1.3 | 0.9 | 0.8 | 1.1 | DCP1       | 1486194..1 mRNA decapping enzy                | orf19.423   | 10483 | CaDCP1     | TRANSCR hydrolase activity                                                                      |
| CA0180 | 1.2 | 1.1 | 1.0 | 0.8 | SPT20      | 1487158..1 transcription factor, me           | orf19.422   | 10486 | CaSPT20    | TRANSCR transcription regulator activity                                                        |
| CA0181 | 1.6 | 1.1 | 0.9 | 0.8 | NOT3       | complemer unknown function                    | orf19.2012  | 15994 | CaNOT3     | TRANSCRIPTION SUBCELLULAR LOCALISATION                                                          |
| CA0182 | 1.5 | 1.0 | 1.1 | 0.9 | IF11       | 1504556..1 unknown function                   | orf19.1130  | 6166  | CaIF11     | CLASSIFICATION NOT YET CLEAR-CUT                                                                |
| CA0183 | 1.5 | 1.7 | 1.5 | 1.3 | CAP1       | 1525251..1 transcriptional acivator           | orf19.9191  | 4242  | CaCAP1     | TRANSCR DNA binding,transcription regulator activity                                            |
| CA0184 | 7.0 | 2.7 | 3.1 | 1.0 | IPF19142   | complemer unknown function                    | orf19.11467 | 19142 | IPF19142   | UNCLASSIFIED PROTEINS                                                                           |
| CA0185 | 1.5 | 1.0 | 1.0 | 1.0 | PLB4.5F    | 1545784..1 Phospholipase, 5-prim              | orf19.9017  | 15731 | CaPLB4.5f  | Lipid fatty-acid and isoprenoid metabolism ""Other virulence attributes                         |
| CA0186 | 0.9 | 0.9 | 1.0 | 1.1 | PLB4.3F    | 1546979..1 phospholipase, 3-prim              | orf19.9018  | 15733 | CaPLB4.3f  | Lipid fatty-acid and isoprenoid metabolism ""Other virulence attributes                         |
| CA0187 | 1.5 | 1.0 | 0.8 | 0.9 | IPF15734   | 1548674..1 unknown function                   |             | 15734 | IPF15734   | No significant S.c. match                                                                       |
| CA0188 | 0.6 | 0.6 | 0.9 | 1.2 | IPF15442   | 1550839..1 unknown function                   | orf19.9467  | 15442 | IPF15442   | UNCLASSImolecular_function unknown                                                              |
| CA0189 | 2.0 | 1.7 | 2.1 | 1.3 | IPF12201   | 1556912..1 Na+-nucleoside cotran              | orf19.11600 | 12201 | IPF12201   | No significant S.c. match                                                                       |
| CA0190 | 1.4 | 2.2 | 1.2 | 1.2 | IPF14773   | 1564584..1 unknown function                   | orf19.11070 | 14773 | IPF14773   | UNCLASSImolecular_function unknown                                                              |
| CA0191 | 1.4 | 1.1 | 0.8 | 0.9 | PEX7       | 1568044..1 peroxisomal import pr              | orf19.89    | 9594  | CaPEX7     | PROTEIN I signal transducer activity                                                            |
| CA0192 | 0.5 | 0.9 | 0.8 | 0.9 | IPF15134   | 1577818..1 Unknown function                   | orf19.1177  | 15134 | IPF15134   | SUBCELLLmolecular_function unknown                                                              |
| CA0193 |     | 1.6 | 1.2 | 1.3 | IPF6493    | 1583508..1 unknown function                   | orf19.1541  | 6493  | IPF6493    | UNCLASSIFIED PROTEINS                                                                           |
| CA0194 | 0.7 | 0.9 | 1.0 | 1.0 | IPF16228   | 1589730..1 unknown function                   | orf19.11404 | 16228 | IPF16228   | UNCLASSIhydrolase activity                                                                      |
| CA0195 | 0.6 | 0.7 | 0.8 | 0.9 | IPF12688   | 1590754..1 unknown function                   | orf19.11403 | 12688 | IPF12688   | Amino acid molecular_function unknown                                                           |
| CA0196 | 1.7 | 1.4 | 1.2 | 0.9 | IPF15799   | 1598544..1 unknown function                   | orf19.1651  | 15799 | IPF15799   | UNCLASSIFIED PROTEINS                                                                           |
| CA0197 | 1.4 | 0.9 | 1.0 | 0.8 | IPF9787    | complemer similar to Saccharomy               | orf19.1934  | 9787  | IPF9787    | TRANSCR DNA binding                                                                             |
| CA0198 | 2.6 | 1.3 | 1.5 | 0.9 | IPF19685   | 1609514..1 unknown function                   | orf19.9227  | 19685 | IPF19685   | UNCLASSImolecular_function unknown                                                              |
| CA0199 | 1.1 | 0.9 | 0.6 | 1.2 | KAP104     | complemer karyopherin-β prote                 | orf19.3556  | 16463 | CaKAP104   | CELLULAFnucleotidyltransferase activity                                                         |
| CA0200 | 2.8 | 2.5 | 1.6 | 1.3 | IPF15119   | complemer unknown function                    | orf19.9109  | 15119 | IPF15119   | CELLULAFtransporter activity                                                                    |
| CA0201 | 1.0 | 1.0 |     | 0.9 | IPF15116   | complemer Unknown function                    | orf19.9108  | 15116 | IPF15116   | UNCLASSImolecular_function unknown                                                              |
| CA0202 | 4.4 | 1.0 | 2.3 | 0.7 | IPF19126   | complemer putative aminoacid trar             | orf19.1210  | 19126 | IPF19126   | TRANSPO transporter activity                                                                    |
| CA0203 | 1.0 | 1.1 | 0.9 | 1.1 | MID1       | 1638166..1 involved in Ca2+ influx            | orf19.10724 | 12820 | CaMID1     | REGULATItransporter activity                                                                    |
| CA0204 | 1.4 |     | 1.0 | 1.1 | IKI3       | 1641499..1 killer toxin insensitive           | orf19.1222  | 15693 | CaIKI3     | CLASSIFICtranscription regulator activity                                                       |
| CA0205 | 1.0 | 1.0 | 1.0 | 1.1 | DBF2       | complemer putative ser/thr protein            | orf19.1223  | 13853 | CaDBF2     | CELL CYC protein kinase activity                                                                |
| CA0206 | 1.5 | 1.1 |     | 1.1 | IPF14089   | 1675193..1 putative serine/threon             | orf19.10297 | 14089 | IPF14089   | ENERGY CELL CYCLE AND DNA PROCESSING SUBCELLULAR LOCALISATION                                   |
| CA0207 | 0.7 | 1.1 | 1.1 | 0.9 | IPF18002   | 1695412..1 Unknown function                   | orf19.1226  | 18002 | IPF18002   | UNCLASSIFIED PROTEINS                                                                           |
| CA0208 | 1.3 | 1.0 | 0.9 | 0.9 | IPF19850   | 1697550..1 unknown function                   | orf19.1227  | 19850 | IPF19850   | Amino acid metabolism TRANSCRIPTION SUBCELLULAR LOCALISATION UNCLASSIFIED PROTEINS              |
| CA0209 | 0.8 | 1.1 | 1.3 | 1.0 | HAP2       | 1699253..1 CCAAT-binding factor               | orf19.1228  | 16519 | CaHAP2     | TRANSCR transcription regulator activity                                                        |
| CA0210 | 1.0 | 0.8 | 0.8 | 0.9 | IPF4328    | complemer unknown function                    | orf19.12971 | 4328  | IPF4328    | UNCLASSImolecular_function unknown                                                              |
| CA0211 | 0.8 | 0.8 | 1.0 | 1.1 | IPF4326    | complemer unknown function                    | orf19.12970 | 4326  | IPF4326    | No significant S.c. match                                                                       |
| CA0212 | 1.0 | 0.9 |     | 0.8 | IPF4325    | 1705735..1 unknown function                   | orf19.12969 | 4325  | IPF4325    | No significant S.c. match                                                                       |
| CA0213 | 1.3 | 1.1 |     | 1.1 | CDS1       | complemer CDP-diacylglycerol syr              | orf19.1279  | 16312 | CaCDS1     | Lipid fatty-εnucleotidyltransferase activity                                                    |
| CA0214 | 1.5 | 1.2 | 1.0 | 0.9 | SCT11      | 1727719..1 Suppresses a choline-l             | orf19.1289  | 9596  | CaSCT11    | TRANSPO transferase activity                                                                    |
| CA0215 | 1.1 | 0.9 | 0.8 | 1.0 | IPF15350   | 1733843..1 putative zinc finger trar          | orf19.2745  | 15350 | IPF15350   | Amino acid transcription regulator activity,DNA binding                                         |
| CA0216 | 1.6 | 2.0 | 1.4 | 1.2 | IPF11681   | complemer unknown function                    | orf19.1682  | 11681 | IPF11681   | No significant S.c. match                                                                       |
| CA0217 | 1.2 | 0.9 | 0.8 | 1.1 | MNN4       | 1752492..1 regulates the mannosy              | orf19.849   | 19522 | CaMNN4     | PROTEIN I molecular_function unknown                                                            |
| CA0218 | 0.8 | 1.0 | 1.2 | 1.2 | IPF15294   | 1765941..1 unknown function                   | orf19.6238  | 15294 | IPF15294   | No significant S.c. match                                                                       |

|        |      |     |     |     |            |                                                |                  |                                                                                                  |
|--------|------|-----|-----|-----|------------|------------------------------------------------|------------------|--------------------------------------------------------------------------------------------------|
| CA0219 | 1.4  | 1.0 | 1.4 | 1.2 | YAP3       | complemer transcription factor of ε orf19.3193 | 19852 CaYAP3     | TRANSCR DNA binding,transcription regulator activity                                             |
| CA0220 | 1.2  | 0.7 | 1.0 | 1.2 | ABZ1       | complemer para-aminobenzoate s' orf19.1291     | 10474 CaABZ1     | Metabolism lyase activity                                                                        |
| CA0221 | 1.0  | 1.0 | 1.1 | 0.9 | PUS4       | 1785176..1 pseudouridine synthas orf19.9509    | 16835 CaPUS4     | Nucleotide lyase activity                                                                        |
| CA0222 | 1.1  | 1.1 | 0.9 | 0.8 | IPF12141   | 1786478..1 unknown function orf19.9508         | 12141 IPF12141   | UNCLASSIFIED PROTEINS                                                                            |
| CA0223 | 1.7  | 1.1 | 1.3 | 0.8 | VAS1       | complemer valyl-tRNA synthetase orf19.1295     | 13980 CaVAS1     | PROTEIN ligase activity                                                                          |
| CA0224 | 0.9  | 1.1 | 1.2 | 1.4 | PRP31      | complemer pre-mRNA splicing pro orf19.1296     | 13982 CaPRP31    | TRANSCR RNA binding                                                                              |
| CA0225 | 1.0  | 1.3 |     | 1.1 | NUP84      | complemer nuclear pore protein (b orf19.1298   | 16027 CaNUP84    | CELLULAF structural molecule activity                                                            |
| CA0226 | 1.0  | 1.0 | 1.3 | 0.9 | IPF16024   | 1805331..1 unknown function orf19.1297         | 16024 IPF16024   | UNCLASSIFIED PROTEINS                                                                            |
| CA0227 | 0.7  | 1.2 | 1.0 | 1.0 | PHO23      | complemer involved in transcriptio orf19.9328  | 6854 CaPHO23     | TRANSCR hydrolase activity                                                                       |
| CA0228 | 1.4  | 1.4 | 1.0 | 1.2 | IPT1       | complemer Mannosyl diphosphory orf19.12233     | 11674 CaIPT1     | Lipid fatty-ε-transferase activity                                                               |
| CA0229 | 1.1  | 1.0 | 1.1 | 1.2 | IPF8147    | 1820547..1 unknown function orf19.13580        | 8147 IPF8147     | CELL FATE                                                                                        |
| CA0230 | 1.0  | 1.0 | 1.1 | 0.9 | TOM37      | 1826653..1 Mitochondrial outer me orf19.1532   | 17420 CaTOM37    | No significant S.c. match                                                                        |
| CA0231 | 0.4  | 0.9 | 1.0 | 1.0 | RAD23      | complemer nucleotide excision rep orf19.1494   | 16846 CaRAD23    | CELL CYC DNA binding                                                                             |
| CA0232 | 1.4  | 1.0 | 1.0 | 0.7 | IFA1       | 1837394..1 Unknown function orf19.156          | 15128 CaIFA1     | Nucleotide metabolism CELL CYCLE AND DNA PROCESSING CELLULAR COMMUNICATION/SIGNAL TRANSDUCTION M |
| CA0233 | 0.7  | 1.0 | 1.0 | 1.0 | URE2       | 1840615..1 Nitrogen catabolite rep orf19.7794  | 15126 CaURE2     | Nitrogen ar transcription regulator activity                                                     |
| CA0234 | 0.3  | 1.0 | 1.0 | 1.2 | IFA3       | 1842051..1 unknown function orf19.7793         | 19598 CaIFA3     | UNCLASSI molecular_function unknown                                                              |
| CA0235 | 1.4  | 1.0 | 1.1 | 0.9 | HIS3       | complemer imidazole glycerol pho: orf19.7813   | 13420 CaHIS3     | Amino acid lyase activity                                                                        |
| CA0236 | 0.8  | 1.0 | 1.1 | 1.1 | MDM10      | 1853443..1 Involved in mitochondr orf19.7814   | 13419 CaMDM10    | SUBCELLL molecular_function unknown                                                              |
| CA0237 | 1.2  | 1.0 | 1.0 | 1.1 | IPF13416   | complemer Unknown function orf19.7818          | 13416 IPF13416   | SUBCELLL molecular_function unknown                                                              |
| CA0238 | 0.6  | 1.0 | 1.0 | 1.0 | PHA2.3     | complemer prephenate dehydratas orf19.7864     | 10101 CaPHA2.3   | Amino acid lyase activity                                                                        |
| CA0239 | 0.3  | 0.5 | 0.5 | 1.0 | RPL9B      | complemer RPL9B ribosomal pro orf19.236        | 10099 CaRPL9B    | PROTEIN structural molecule activity                                                             |
| CA0241 | 1.3  | 1.1 | 1.2 | 1.0 | IPF15630   | complemer unknown function orf19.3470          | 15630 IPF15630   | UNCLASSI molecular_function unknown                                                              |
| CA0242 | 0.9  | 0.9 | 0.9 | 1.0 | IPF12047   | complemer unknown function orf19.3471          | 12047 IPF12047   | No significant S.c. match                                                                        |
| CA0243 | 1.1  | 1.0 | 1.1 | 1.1 | BSD2       | complemer Metal homeostasis pro orf19.5869     | 15266 CaBSD2     | REGULATI molecular_function unknown                                                              |
| CA0244 | 1.0  | 0.9 | 0.8 | 1.0 | IPF19082   | 1890894..1 unknown function                    | 19082 IPF19082   | No significant S.c. match                                                                        |
| CA0245 | 0.9  | 1.1 | 1.1 | 0.8 | POL5       | 1892763..1 DNA polymerase V (by orf19.13042    | 17372 CaPOL5     | CLASSIFIC nucleotidyltransferase activity                                                        |
| CA0246 | 0.7  | 0.8 | 1.0 | 1.2 | IPF14452.f | 1896228..1 F1-ATPase epsilon subunit (by hom   | 17243 IPF14452.r | No significant S.c. match                                                                        |
| CA0247 | 0.7  | 1.0 | 1.0 | 1.0 | RIB21      | 1900939..1 DRAP deaminase (by l orf19.2788     | 7263 CaRIB21     | Metabolism of vitamins cofactors and prosthetic groups                                           |
| CA0248 | 0.6  | 1.0 | 0.9 | 0.9 | IPF7262    | complemer unknown function orf19.2789          | 7262 IPF7262     | No significant S.c. match                                                                        |
| CA0249 | 4.7  | 1.5 | 1.9 | 1.2 | IPF19617   | 1906767..1 unknown function orf19.1350         | 19617 IPF19617   | No significant S.c. match                                                                        |
| CA0250 | 1.1  | 1.1 | 1.3 | 0.9 | IPF17661   | complemer unknown function orf19.1348          | 17661 IPF17661   | No significant S.c. match                                                                        |
| CA0251 | 1.1  | 1.0 | 1.2 | 1.0 | IPF9146    | complemer unknown function orf19.13622         | 9146 IPF9146     | No significant S.c. match                                                                        |
| CA0252 | 1.4  | 0.9 | 1.0 | 0.9 | SBP1.5EO   | complemer RNA binding protein-like orf19.13276 | 19078 CaSBP1.5e  | No significant S.c. match                                                                        |
| CA0253 | 1.3  | 1.0 | 0.9 | 0.8 | FIL1       | 1921259..1 Putative mitochondrial orf19.477    | 7101 CaFIL1      | PROTEIN translation regulator activity                                                           |
| CA0254 | 1.3  | 0.9 | 0.9 | 0.8 | IPF14968   | 1939294..1 unknown function orf19.3461         | 14968 IPF14968   | No significant S.c. match                                                                        |
| CA0255 | 1.4  | 1.1 | 1.1 | 1.1 | IPF16558.ε | 1941150..1 putative transcription ir orf19.735 | 16558 IPF16558.ε | CELL CYCLE AND DNA PROCESSING TRANSCRIPTION SUBCELLULAR LOCALISATION                             |
| CA0256 | 0.4  | 1.0 |     | 1.1 | IPF10309   | 1948932..1 unknown function orf19.2278         | 10309 IPF10309   | UNCLASSI molecular_function unknown                                                              |
| CA0257 | 1.1  | 1.0 | 1.1 | 0.8 | IPF10079   | complemer unknown function orf19.2280          | 10084 IPF10079   | C-compound and carbohydrate metabolism ENERGY TRANSCRIPTION SUBCELLULAR LOCALISATION             |
| CA0258 | 0.7  | 1.1 | 0.9 | 1.2 | IPF17112   | 1962316..1 thiosulfate sulfurtransf orf19.1356 | 17112 IPF17112   | Nitrogen ar transferase activity                                                                 |
| CA0259 | 2.2  | 1.1 | 1.1 | 0.9 | SOL1       | complemer multicopy suppressor crf19.1355      | 17111 CaSOL1     | TRANSCR molecular_function unknown                                                               |
| CA0260 | 0.8  | 0.8 | 1.0 | 1.1 | IPF13683   | 1973066..1 unknown function orf19.2547         | 13683 IPF13683   | No significant S.c. match                                                                        |
| CA0261 | 1.6  | 1.6 | 1.3 | 0.9 | LYS22      | 1981734..1 Homocitrate synthase orf19.8394     | 3880 CaLYS22     | Amino acid transferase activity                                                                  |
| CA0262 | 1.7  | 1.7 | 1.5 | 0.8 | IPF20054   | 1986390..1 unknown function orf19.1407         | 20054 IPF20054   | UNCLASSI molecular_function unknown                                                              |
| CA0263 | 1.2  | 0.8 | 1.4 | 1.3 | GLK1       | complemer aldohexose specific glt orf19.1408   | 8388 CaGLK1      | C-compour transferase activity                                                                   |
| CA0264 | 0.8  | 0.9 |     | 1.1 | IPF8434    | 1992595..1 unknown function                    | 8434 IPF8434     | No significant S.c. match                                                                        |
| CA0265 | 0.8  | 1.7 | 0.8 | 1.1 | STI1       | 2002146..2 stress-induced protein orf19.10702  | 9198 CaSTI1      | CELL RES chaperone activity                                                                      |
| CA0266 | 0.8  | 0.9 | 0.6 | 0.9 | IPF17773   | complemer unknown function                     | 17773 IPF17773   | No significant S.c. match                                                                        |
| CA0267 | 1.1  | 0.9 | 1.1 | 1.0 | IPF12262   | 2020672..2 extracellular alpha-1,4- orf19.9183 | 12262 IPF12262   | No significant S.c. match                                                                        |
| CA0268 | 1.9  | 1.1 | 1.3 | 1.3 | PUF2.EXO   | complemer RNA-binding protein, e orf19.4262    | 15191 CaPUF2.e   | CELL CYC RNA binding                                                                             |
| CA0269 | 1.0  | 1.3 | 1.3 | 1.1 | PUF2.EXO   | complemer RNA-binding protein (b orf19.4263    | 15189 CaPUF2.e)  | No significant S.c. match                                                                        |
| CA0270 | 1.4  | 1.0 | 1.2 | 1.0 | PRB2       | complemer Protease B, vacuolar (l orf19.9783   | 12896 CaPRB2     | PROTEIN FATE [folding modification destination] ""SUBCELLULAR LOCALISATION                       |
| CA0271 | 0.8  | 1.1 | 1.0 | 1.2 | IPF12897   | complemer putative oxidoreductas orf19.9785    | 12897 IPF12897   | C-compound and carbohydrate metabolism                                                           |
| CA0272 | 1.0  | 1.1 | 1.0 | 1.0 | DPB11      | complemer DNA polymerase II cor orf19.1434     | 17695 CaDPB11    | CELL CYC nucleotidyltransferase activity                                                         |
| CA0273 | 1.8  | 1.3 | 2.2 | 1.0 | IPF19066   | 2039965..2 unknown function orf19.1433         | 19066 IPF19066   | UNCLASSIFIED PROTEINS                                                                            |
| CA0274 | 2.5  | 1.7 | 1.8 | 1.0 | IPF15153   | 2045228..2 unknown function orf19.13289        | 15153 IPF15153   | CELL RESCUE DEFENSE AND VIRULENCE ""SUBCELLULAR LOCALISATION                                     |
| CA0275 | 1.1  | 1.3 | 1.1 | 0.8 | NTA1       | complemer Amino-terminal amidas orf19.8470     | 14821 CaNTA1     | PROTEIN hydrolase activity                                                                       |
| CA0276 | 0.9  | 1.1 | 1.1 | 0.9 | IPF15015   | 2056178..2 unknown function orf19.13055        | 15015 IPF15015   | No significant S.c. match                                                                        |
| CA0277 | 0.2  | 0.4 |     | 1.1 | RNH1       | 2059216..2 ribonuclease H (by hor orf19.13057  | 12328 CaRNH1     | Nucleotide metabolism CONTROL OF CELLULAR ORGANIZATION                                           |
| CA0278 | 0.9  | 1.0 | 1.1 | 1.1 | IPF15772   | complemer unknown function                     | 15772 IPF15772   | No significant S.c. match                                                                        |
| CA0279 | 1.0  | 0.7 | 1.0 | 1.1 | IPF10568   | 2076229..2 unknown function orf19.1440         | 10568 IPF10568   | No significant S.c. match                                                                        |
| CA0280 | 0.7  | 1.0 | 1.0 | 1.0 | IPF10566   | 2078226..2 unknown function orf19.1439         | 10566 IPF10566   | CELLULAF transferase activity                                                                    |
| CA0281 | 1.1  | 0.9 | 0.9 | 0.9 | IPF10564.ε | complemer unknown function, 3-pr orf19.1438    | 10565 IPF10564.ε | No significant S.c. match                                                                        |
| CA0282 | 0.9  | 1.0 | 0.8 | 1.1 | IPF17417   | 2086004..2 Unknown function orf19.12160        | 17417 IPF17417   | CELL RESCUE DEFENSE AND VIRULENCE ""SUBCELLULAR LOCALISATION TRANSPORT FACILITATION UNCLASSIFI   |
| CA0283 | 0.6  | 0.9 |     | 0.9 | IPF18034   | 2087607..2 Unknown function                    | 18034 IPF18034   | UNCLASSIFIED PROTEINS                                                                            |
| CA0284 | 0.9  | 0.9 | 1.0 | 0.9 | IPF14657   | 2093067..2 unknown function orf19.1441         | 14657 IPF14657   | No significant S.c. match                                                                        |
| CA0285 | 1.2  | 0.9 | 1.1 | 1.0 | IPF14392   | 2100169..2 unknown function orf19.1535         | 14392 IPF14392   | No significant S.c. match                                                                        |
| CA0286 | 16.1 | 3.0 | 7.5 | 1.6 | IPF14618   | complemer unknown function orf19.6079          | 14618 IPF14618   | No significant S.c. match                                                                        |
| CA0287 | 1.1  | 0.9 | 1.2 | 0.9 | IPF14615   | 2105364..2 unknown function orf19.6080         | 14615 IPF14615   | CELL CYCLE AND DNA PROCESSING                                                                    |
| CA0288 | 1.0  | 1.0 | 1.1 | 1.0 | IPF14614   | 2107184..2 unknown function                    | 14614 IPF14614   | No significant S.c. match                                                                        |
| CA0289 | 0.7  | 1.0 | 0.9 | 1.0 | IPF13333   | complemer unknown function orf19.1590          | 13333 IPF13333   | No significant S.c. match                                                                        |
| CA0290 | 1.2  | 0.9 | 0.5 | 1.2 | POT14      | complemer acetyl-CoA acetyltrans orf19.1591    | 13331 CaPOT14    | Lipid fatty-ε-transferase activity                                                               |

|        |     |     |     |     |          |                                               |               |       |           |                                                                                                  |
|--------|-----|-----|-----|-----|----------|-----------------------------------------------|---------------|-------|-----------|--------------------------------------------------------------------------------------------------|
| CA0291 | 0.5 | 1.1 | 0.8 | 1.1 | IPF13328 | 2112387..2 unknown function                   | orf19.1592    | 13328 | IPF13328  | UNCLASSI molecular_function unknown                                                              |
| CA0292 | 1.3 | 1.0 | 1.0 | 0.8 | IPF19855 | complemer unknown function                    | orf19.13841   | 19855 | IPF19855  | No significant S.c. match                                                                        |
| CA0293 | 2.7 | 1.5 | 1.9 | 0.9 | IPF6624  | complemer unknown function                    | orf19.6489    | 6624  | IPF6624   | UNCLASSI molecular_function unknown                                                              |
| CA0294 | 1.1 | 1.0 | 1.2 | 1.0 | IPF16061 | 2125621..2 unknown function                   | orf19.9322    | 16061 | IPF16061  | UNCLASSI isomerase activity                                                                      |
| CA0295 | 1.1 | 0.9 | 1.1 | 1.1 | IPF15033 | complemer unknown function                    | orf19.1595    | 15033 | IPF15033  | UNCLASSI molecular_function unknown                                                              |
| CA0296 | 1.0 | 1.0 | 1.1 | 1.1 | IFA11    | complemer Unknown function                    | orf19.1596    | 15031 | CaIFA11   | Nucleotide metabolism CELL CYCLE AND DNA PROCESSING CELLULAR COMMUNICATION/SIGNAL TRANSDUCTION M |
| CA0297 | 0.9 | 1.3 | 1.0 | 0.9 | CDC53    | 2137417..2 Cell division control pr           | orf19.1674    | 14223 | CaCDC53   | Amino acid structural molecule activity                                                          |
| CA0298 | 1.0 | 1.0 | 0.8 | 0.9 | PPT1     | complemer Protein ser/thr phosph              | orf19.1673    | 14222 | CaPPT1    | CLASSIFIC protein phosphatase activity                                                           |
| CA0299 | 1.1 | 1.0 | 1.0 | 0.9 | IPF3765  | 2142629..2 unknown function                   | orf19.1597    | 3765  | IPF3765   | UNCLASSI molecular_function unknown                                                              |
| CA0300 | 0.7 | 0.8 | 0.8 | 1.1 | ERG24    | complemer C-14 sterol reductase               | (orf19.1598   | 3764  | CaERG24   | Lipid fatty-ε oxidoreductase activity                                                            |
| CA0301 | 0.4 | 1.0 | 1.1 | 0.9 | IPF19688 | complemer unknown function                    | orf19.1606    | 19688 | IPF19688  | No significant S.c. match                                                                        |
| CA0302 | 1.3 | 0.8 | 1.0 | 1.0 | MEP3     | 2164073..2 low affinity high capaci           | orf19.9181    | 12620 | CaMEP3    | TRANSPO transporter activity                                                                     |
| CA0303 | 1.1 | 0.9 | 0.9 | 1.0 | IPF17507 | complemer putative glutathione S-             | orf19.8339    | 17507 | IPF17507  | Nitrogen and sulphur metabolism                                                                  |
| CA0304 | 1.1 | 1.3 |     | 1.0 | IPF12829 | complemer unknown function                    | orf19.8340    | 12829 | IPF12829  | UNCLASSI molecular_function unknown                                                              |
| CA0305 | 0.8 | 1.1 | 0.9 | 0.9 | INO80    | 2176470..2 DNA helicase (by hom               | orf19.1734    | 13578 | CaINO80   | TRANSCR hydrolase activity                                                                       |
| CA0306 | 2.3 | 1.1 | 1.3 | 1.2 | HEM3     | 2181626..2 porphobilinogen deami              | orf19.1742    | 15629 | CaHEM3    | Metabolism transferase activity                                                                  |
| CA0307 | 0.9 | 1.0 | 1.1 | 0.9 | IPF4719  | complemer similar to Saccharomy               | orf19.3736    | 4719  | IPF4719   | CELL CYC transcription regulator activity                                                        |
| CA0308 | 0.8 | 1.1 | 0.7 | 0.9 | RHK1     | complemer Mannosyltransferase                 | (orf19.8693   | 17442 | CaRHK1    | C-compour transferase activity                                                                   |
| CA0309 | 1.3 | 1.0 | 1.1 | 0.8 | IPF16935 | complemer unknown function                    | orf19.1091    | 16935 | IPF16935  | PROTEIN f molecular_function unknown                                                             |
| CA0310 | 1.9 | 1.1 | 1.4 | 1.2 | PEX11    | complemer peroxisomal membran                 | orf19.8690    | 19049 | CaPEX11   | SUBCELLL molecular_function unknown                                                              |
| CA0311 | 1.0 |     | 1.0 | 1.0 | DAK2.3EO | 2199549..2 dihydroxyacetone kinase, 3-prime e |               | 19048 | CaDAK2.3e | C-compound and carbohydrate metabolism ""CELL RESCUE DEFENSE AND VIRULENCE ""                    |
| CA0312 | 1.1 | 1.0 | 1.0 | 1.1 | IPF6396  | complemer unknown function                    | orf19.8211    | 6396  | IPF6396   | UNCLASSI molecular_function unknown                                                              |
| CA0315 | 0.9 | 0.8 | 1.0 | 1.1 | ALS9.5EO | complemer agglutinin-like protein,            | orf19.5742    | 19856 | CaALS9.5e | SUBCELLULAR LOCALISATION Other virulence attributes                                              |
| CA0316 | 4.4 | 4.7 | 3.1 | 1.3 | ALS1.3EO | complemer agglutinin-like protein,            | orf19.5741    | 13002 | CaALS1.3e | SUBCELLULAR LOCALISATION Other virulence attributes                                              |
| CA0317 | 1.5 | 0.9 | 1.0 | 0.9 | SSD1     | 2223396..2 Protein phosphatase                | (orf19.3959   | 5791  | CaSSD1    | CELL CYC RNA binding                                                                             |
| CA0318 | 1.0 | 0.9 | 1.1 | 1.0 | FOL2     | 2227680..2 GTP cyclohydrolase                 | (b orf19.3957 | 5793  | CaFOL2    | Metabolism hydrolase activity                                                                    |
| CA0319 | 1.1 | 1.0 | 1.1 | 1.3 | IPF15244 | complemer unknown function, 3-prime end       |               | 19858 | IPF15244  | No significant S.c. match                                                                        |
| CA0321 | 0.9 | 1.0 | 0.8 | 1.1 | APL2     | 2234514..2 AP-1 complex subunit,              | orf19.7861    | 15242 | CaAPL2    | PROTEIN f protein binding                                                                        |
| CA0322 | 0.4 | 1.0 | 0.9 | 1.1 | RPS9B    | 2242781..2 Ribosomal protein                  | orf19.8459    | 3402  | CaRPS9B   | PROTEIN f structural molecule activity                                                           |
| CA0323 | 1.1 | 1.3 | 1.2 | 1.4 | CDC95    | 2245800..2 translation initiation fac         | orf19.9378    | 12555 | CaCDC95   | PROTEIN f molecular_function unknown                                                             |
| CA0324 | 1.2 | 1.0 | 1.2 | 1.0 | STT4     | 2247127..2 Phosphatidylinositol-4-            | orf19.9377    | 14337 | CaSTT4    | Lipid fatty-ε transferase activity                                                               |
| CA0325 | 0.9 | 1.0 | 0.9 | 1.0 | IPF15222 | complemer Unknown function                    | orf19.3781    | 15222 | IPF15222  | UNCLASSIFIED PROTEINS                                                                            |
| CA0326 | 1.0 | 0.9 | 1.2 | 1.2 | IPF15220 | 2255216..2 Unknown function                   | orf19.3780    | 15220 | IPF15220  | No significant S.c. match                                                                        |
| CA0327 | 1.4 | 1.1 |     | 1.1 | IPF15217 | 2256723..2 WD-repeat protein, 5-p             | orf19.3779    | 15219 | IPF15217  | SUBCELLULAR LOCALISATION                                                                         |
| CA0328 | 1.2 | 1.3 | 1.1 | 0.9 | IPF15217 | 2257498..2 WD-repeat protein, 3-p             | orf19.3778    | 15217 | IPF15217  | SUBCELLL molecular_function unknown                                                              |
| CA0329 | 1.3 | 0.9 |     | 1.1 | IMG2     | 2258435..2 Required for Integrity             | corf19.3777   | 15216 | CaIMG2    | CONTROL structural molecule activity                                                             |
| CA0330 | 0.8 | 1.1 | 1.1 | 1.0 | BAT21    | complemer branched-chain amino                | orf19.797     | 5075  | CaBAT21   | Amino acid transferase activity                                                                  |
| CA0331 | 0.8 | 1.1 | 1.1 | 1.1 | ANC1     | 2264913..2 TFIIF subunit, transcrip           | orf19.798     | 5074  | CaANC1    | Phosphate transcription regulator activity                                                       |
| CA0332 | 1.3 | 1.0 | 1.0 | 1.3 | FEN2     | 2271840..2 allantate permease tr              | orf19.12981   | 14381 | CaFEN2    | Amino acid transporter activity                                                                  |
| CA0334 | 0.9 | 0.9 | 0.8 | 1.2 | IPF19562 | complemer unknown function                    | orf19.7824    | 19562 | IPF19562  | No significant S.c. match                                                                        |
| CA0335 | 0.8 | 1.0 | 0.8 | 1.1 | IFA2     | 2277979..2 unknown function                   | orf19.7825    | 16389 | CaIFA2    | Nucleotide metabolism CELL CYCLE AND DNA PROCESSING CELLULAR COMMUNICATION/SIGNAL TRANSDUCTION M |
| CA0336 | 1.2 | 0.8 | 0.9 | 1.2 | IPF9869  | 2284147..2 unknown function                   | orf19.1371    | 9869  | IPF9869   | TRANSCRIPTION SUBCELLULAR LOCALISATION                                                           |
| CA0337 | 1.0 | 1.0 | 1.0 | 1.1 | IPF9867  | complemer unknown function                    | orf19.1370    | 9867  | IPF9867   | No significant S.c. match                                                                        |
| CA0338 | 1.2 | 0.9 | 0.9 | 0.8 | IPF13252 | 2291654..2 unknown function                   | orf19.3378    | 13252 | IPF13252  | No significant S.c. match                                                                        |
| CA0339 | 0.8 | 0.9 | 1.1 | 1.0 | IPF13247 | 2293360..2 unknown function                   | orf19.3376    | 13247 | IPF13247  | No significant S.c. match                                                                        |
| CA0340 | 1.0 | 0.8 | 1.1 | 1.1 | IPF19859 | 2295931..2 unknown function                   | orf19.3375    | 19859 | IPF19859  | No significant S.c. match                                                                        |
| CA0341 | 1.1 | 0.9 | 1.0 | 1.0 | XKS1     | 2298575..2 xylulokinase (by homol             | orf19.1788    | 10472 | CaXKS1    | C-compour transferase activity                                                                   |
| CA0342 | 1.2 | 0.9 |     | 1.0 | IPF10470 | 2300711..2 unknown function                   | orf19.1789    | 10470 | IPF10470  | UNCLASSI molecular_function unknown                                                              |
| CA0343 | 1.2 | 0.9 |     | 1.1 | LYS1.5EO | 2302869..2 saccharopine dehydrogenase, 5-p    | orf19.1346    | 10469 | CaLYS1.5e | Amino acid oxidoreductase activity                                                               |
| CA0344 | 1.0 | 1.0 | 1.4 |     | IPF13328 | complemer Unknown function, 3-p               | orf19.1346    | 16164 | CaIFF1.3e | No significant S.c. match                                                                        |
| CA0345 | 0.4 | 0.3 | 0.4 | 1.0 | ACH1     | complemer acetyl-coenzyme-A hyc               | orf19.10681   | 12009 | CaACH1    | Lipid fatty-ε hydrolase activity                                                                 |
| CA0346 | 0.9 | 0.8 | 1.0 | 0.8 | ROX1     | 2327367..2 Possible heme-depend               | orf19.10341   | 19029 | CaROX1    | Metabolism DNA binding                                                                           |
| CA0347 |     |     |     |     | FOX2     | 2337294..2340014                              |               |       |           |                                                                                                  |
| CA0348 | 1.0 | 1.4 | 1.1 | 1.1 | IFK1     | complemer probable monoxigena:                | orf19.9098    | 15750 | CaIFK1    | No significant S.c. match                                                                        |
| CA0349 | 1.1 | 0.8 | 1.3 | 1.3 | IPF19026 | complemer unknown function                    | orf19.1813    | 19026 | IPF19026  | UNCLASSI molecular_function unknown                                                              |
| CA0350 | 0.9 | 0.9 | 0.8 | 1.0 | SNU114   | complemer snRNP-specific protein              | orf19.7784    | 16740 | CaSNU114  | PROTEIN f RNA binding,helicase activity                                                          |
| CA0351 | 1.0 | 1.0 | 1.1 | 1.1 | RPB4.3F  | complemer DNA-directed RNA pol                | orf19.145     | 19621 | CaRPB4.3f | TRANSCR nucleotidyltransferase activity                                                          |
| CA0352 | 1.6 | 1.1 | 1.2 | 1.0 | RPB4.5F  | complemer DNA-directed RNA pol                | orf19.146     | 19620 | CaRPB4.5f | TRANSCRIPTION ""CELL RESCUE DEFENSE AND VIRULENCE ""SUBCELLULAR LOCALISATION                     |
| CA0353 |     | 1.2 | 1.2 | 1.0 | YAK1.3F  | complemer serine/threonine protei             | orf19.147     | 16043 | CaYAK1.3f | CELL CYC protein kinase activity                                                                 |
| CA0354 | 1.3 | 1.2 | 1.2 | 1.1 | YAK1.5F  | complemer serine/threonine protei             | orf19.7788    | 16042 | CaYAK1.5f | No significant S.c. match                                                                        |
| CA0355 | 1.8 | 1.3 |     | 1.2 | IPF2535  | complemer unknown function                    | orf19.13951   | 2535  | IPF2535   | No significant S.c. match                                                                        |
| CA0356 | 0.7 | 0.6 | 1.0 | 1.0 | IPF2532  | 2378711..2 unknown function                   | orf19.13952   | 2532  | IPF2532   | UNCLASSI molecular_function unknown                                                              |
| CA0357 | 0.9 | 0.9 | 0.9 | 1.0 | FCY22    | complemer purine-cytosine perme               | orf19.333     | 12764 | CaFCY22   | Nucleotide transporter activity                                                                  |
| CA0358 | 0.9 | 1.0 | 0.8 | 1.1 | IPF17488 | 2397615..2 unknown function, 5-pr             | orf19.1818    | 17488 | IPF17488  | No significant S.c. match                                                                        |
| CA0359 | 0.8 | 0.9 | 0.9 | 0.9 | IPF17488 | 2398456..2 unknown function, 3-pr             | orf19.1820    | 17489 | IPF17488  | No significant S.c. match                                                                        |
| CA0360 | 1.7 | 1.2 |     | 0.9 | IPF2328  | complemer unknown function                    | orf19.8720    | 2328  | IPF2328   | No significant S.c. match                                                                        |
| CA0361 | 1.4 | 0.9 | 0.9 | 1.1 | IPF2326  | 2404599..2 unknown function                   | orf19.1124    | 2326  | IPF2326   | No significant S.c. match                                                                        |
| CA0362 | 0.4 | 0.6 | 0.8 | 0.7 | TEF1     | complemer translation elongation f            | orf19.9009    | 9732  | CaTEF1    | PROTEIN f translation elongator activity                                                         |
| CA0363 | 0.6 | 1.2 | 1.0 | 1.0 | SPR3     | 2414124..2 sporulation-specific se            | orf19.1524    | 16732 | CaSPR3    | CELL FATE SUBCELLULAR LOCALISATION                                                               |
| CA0364 | 1.6 | 1.0 | 1.0 | 0.8 | IPF15983 | 2416756..2 unknown function                   | orf19.1525    | 15983 | IPF15983  | Nucleotide molecular_function unknown                                                            |
| CA0365 | 0.9 | 1.1 | 1.1 | 1.0 | IPF15177 | complemer Unknown function                    | orf19.750     | 15177 | IPF15177  | No significant S.c. match                                                                        |

|        |      |     |      |     |            |                                                |             |       |            |                                                                                                                         |
|--------|------|-----|------|-----|------------|------------------------------------------------|-------------|-------|------------|-------------------------------------------------------------------------------------------------------------------------|
| CA0366 | 0.8  | 1.1 | 1.1  | 1.0 | IPF19017   | 2443661..2unknown function                     | orf19.8931  | 19017 | IPF19017   | No significant S.c. match                                                                                               |
| CA0367 | 1.5  | 1.1 | 1.2  | 1.1 | TIM22      | complemer Mitochondrial import in              | orf19.1352  | 16416 | CaTIM22    | PROTEIN Itransporter activity                                                                                           |
| CA0368 | 4.6  | 1.5 | 3.0  | 1.2 | IPF11646   | 2446413..2unknown function                     | orf19.1353  | 11646 | IPF11646   | No significant S.c. match                                                                                               |
| CA0369 | 1.0  | 1.2 | 0.8  | 1.0 | IPF13675   | complemer unknown function                     | orf19.1656  | 13675 | IPF13675   | UNCLASSIFIED PROTEINS                                                                                                   |
| CA0370 | 0.7  | 0.7 | 0.9  | 1.2 | IPF13678   | complemer unknown function                     |             | 13678 | IPF13678   | CLASSIFIC molecular_function unknown                                                                                    |
| CA0371 | 0.4  | 1.1 |      | 0.8 | IPF19578   | complemer unknown function                     | orf19.1087  | 19578 | IPF19578   | No significant S.c. match                                                                                               |
| CA0372 | 1.6  | 1.2 | 1.0  | 0.9 | IPF10062   | complemer unknown function                     | orf19.1086  | 10062 | IPF10062   | UNCLASSI molecular_function unknown                                                                                     |
| CA0373 | 1.0  | 0.9 | 1.0  | 0.9 | IPF7655.5f | complemer unknown function, 5-prime end        |             | 7655  | IPF7655.5f | No significant S.c. match                                                                                               |
| CA0374 | 0.7  | 1.1 | 1.1  | 1.0 | IFK3       | complemer Probable monooxygen                  | orf19.8477  | 7651  | CaIFK3     | No significant S.c. match                                                                                               |
| CA0375 | 0.2  | 0.2 | 0.6  | 0.9 | CRH11      | 2480849..2Probable membrane p                  | orf19.2706  | 14360 | CaCRH11    | SUBCELLL molecular_function unknown                                                                                     |
| CA0376 | 0.5  | 0.8 | 0.8  | 0.9 | QCR9       | 2482622..2ubiquinol--cytochrome-c reductase s  |             | 14357 | CaQCR9     | ENERGY Stransporter activity,oxidoreductase activity                                                                    |
| CA0377 | 0.8  | 0.8 | 1.1  | 1.0 | IPF14356   | 2483232..2unknown function                     | orf19.2708  | 14356 | IPF14356   | UNCLASSI molecular_function unknown                                                                                     |
| CA0378 | 0.5  | 1.1 | 1.0  | 1.1 | IPF3178    | complemer Unknown function                     | orf19.3170  | 3178  | IPF3178    | UNCLASSI molecular_function unknown                                                                                     |
| CA0379 | 0.9  | 1.1 | 1.1  | 1.2 | SSP120     | 2494755..2secretory protein (by h              | orf19.3173  | 12012 | CaSSP120   | CELLULAF molecular_function unknown                                                                                     |
| CA0380 | 6.7  | 1.6 | 1.5  | 1.4 | IPF14109   | 2512372..2unknown function                     | orf19.2451  | 14109 | IPF14109   | No significant S.c. match                                                                                               |
| CA0381 | 0.9  | 0.9 | 1.0  | 1.0 | IPF16047   | complemer unknown function                     | orf19.2825  | 16047 | IPF16047   | UNCLASSI molecular_function unknown                                                                                     |
| CA0382 | 1.3  | 1.2 | 1.2  | 1.1 | IPF16030   | 2528963..2similar to Saccharomy                | orf19.1842  | 16030 | IPF16030   | CELL FATI signal transducer activity                                                                                    |
| CA0383 | 1.8  | 1.2 | 1.3  | 1.0 | IPF16028   | 2533990..2unknown function                     | orf19.1841  | 16028 | IPF16028   | Lipid fatty-acid and isoprenoid metabolism ""CELL CYCLE AND DNA PROCESSING PROTEIN SYNTHESIS CELLULAR COM               |
| CA0384 | 0.8  | 0.9 | 1.0  | 1.0 | PCL1       | 2549651..2cyclin, G1/S-specific (b             | orf19.10172 | 16634 | CaPCL1     | CELL CYC protein kinase activity,enzyme regulator activity                                                              |
| CA0385 | 1.1  | 1.4 | 1.3  | 1.2 | IPF4071    | complemer unknown function                     | orf19.1861  | 4071  | IPF4071    | CELL CYCLE AND DNA PROCESSING SUBCELLULAR LOCALISATION                                                                  |
| CA0386 | 0.6  | 1.5 | 1.3  | 1.0 | IPF4065    | 2557981..2unknown function                     | orf19.1862  | 4065  | IPF4065    | UNCLASSI molecular_function unknown                                                                                     |
| CA0387 | 0.8  | 1.0 | 1.0  | 1.0 | IPF10318.f | complemer unknown function, 5-prime end        |             | 14475 | IPF10318.f | No significant S.c. match                                                                                               |
| CA0388 | 1.9  | 1.2 | 1.1  | 1.0 | IPF14468   | 2564217..2unknown function                     | orf19.1907  | 14468 | IPF14468   | UNCLASSI molecular_function unknown                                                                                     |
| CA0389 | 0.5  | 1.0 | 0.9  | 0.9 | IPF14465   | complemer unknown function                     | orf19.1910  | 14465 | IPF14465   | No significant S.c. match                                                                                               |
| CA0390 | 1.3  | 1.0 | 0.8  | 0.9 | DCG1       | complemer involved in nitrogen-ca              | orf19.244   | 10499 | CaDCG1     | Nitrogen ar molecular_function unknown                                                                                  |
| CA0391 | 0.8  | 1.2 | 1.1  | 1.0 | DDC1       | 2572793..2DNA damage checkpo                   | orf19.7875  | 10496 | CaDDC1     | CELL CYC molecular_function unknown                                                                                     |
| CA0393 | 1.3  | 1.0 | 1.1  | 1.2 | IPF12758.f | complemer unknown function, 3-prime end        |             | 12759 | IPF12758.f | No significant S.c. match                                                                                               |
| CA0394 | 1.8  | 1.3 | 1.4  | 1.0 | IPF12758.f | complemer unknown function, 5-pr               | orf19.7966  | 12758 | IPF12758.f | No significant S.c. match                                                                                               |
| CA0395 | 2.0  | 1.0 | 1.1  | 0.8 | SEF11.5E   | complemer Putative transcription f             | orf19.1926  | 15112 | CaSEF11.f  | TRANSCRIPTION CELL FATE SUBCELLULAR LOCALISATION                                                                        |
| CA0396 | 1.0  | 1.0 | 1.0  | 0.9 | SNM1       | 2596774..2RNA binding protein of               | orf19.1927  | 15109 | CaSNM1     | No significant S.c. match                                                                                               |
| CA0397 | 0.9  | 0.8 | 1.1  | 1.0 | FRE31      | complemer Ferric reductase (by h               | orf19.1930  | 15107 | CaFRE31    | REGULATI oxidoreductase activity                                                                                        |
| CA0398 | 0.5  | 1.0 | 0.8  | 1.0 | ARO2       | 2602824..2chorismate synthase (t               | orf19.1986  | 14673 | CaARO2     | Amino acid lyase activity                                                                                               |
| CA0399 | 1.3  | 0.9 | 0.9  | 0.8 | CDC45      | complemer Chromosomal DNA re                   | orf19.1988  | 14671 | CaCDC45    | CELL CYC DNA binding                                                                                                    |
| CA0400 | 0.9  | 0.9 | 1.2  | 0.9 | IPF7423.3f | 2608466..2similar to Saccharomy                | orf19.6223  | 11910 | IPF7423.3f | CELL FATE                                                                                                               |
| CA0401 | 1.4  | 0.9 | 1.4  | 1.0 | RTA1       | complemer unknown function                     | orf19.6224  | 11914 | CaRTA1     | UNCLASSIFIED PROTEINS                                                                                                   |
| CA0402 | 1.2  | 0.8 | 1.0  | 1.1 | IPF15225   | complemer Sorting nexin-like prote             | orf19.1990  | 15225 | IPF15225   | PROTEIN FATE [folding modification destination]                                                                         |
| CA0403 | 0.4  | 0.9 | 1.0  | 1.1 | IPF15224   | complemer unknown function                     | orf19.1989  | 15224 | IPF15224   | UNCLASSI molecular_function unknown                                                                                     |
| CA0404 | 1.1  | 1.0 | 1.1  | 1.2 | LYS14      | 2624704..2transcription factor inv             | orf19.5548  | 14435 | CaLYS14    | Amino acid transcription regulator activity                                                                             |
| CA0405 | 1.0  | 0.9 | 0.9  | 0.9 | IPF19862.f | complemer unknown function, 3-pr               | orf19.12993 | 19861 | IPF19862.f | No significant S.c. match                                                                                               |
| CA0407 |      |     |      |     | SAC6.3F    | complement(2627330..2627737)                   |             | 8093  | CaSAC6.5f  | CELLULAF protein binding                                                                                                |
| CA0408 | 1.6  | 2.0 | 1.0  | 1.4 | SAC6.5F    | complemer actin filament bundling              | orf19.5544  | 15067 | CaPHO80    | Phosphate kinase activity,enzyme regulator activity                                                                     |
| CA0409 | 1.9  | 1.3 | 1.2  | 1.0 | PHO80      | 2633763..2Cyclin (by homology)                 | orf19.5755  | 15065 | IPF15065   | UNCLASSI molecular_function unknown                                                                                     |
| CA0410 | 1.0  | 1.1 | 1.2  | 1.0 | IPF15065   | complemer unknown function                     | orf19.13180 | 17676 | IPF17676   | SUBCELLL protein binding                                                                                                |
| CA0411 | 1.1  | 0.8 | 1.0  | 1.0 | IPF17676   | 2640129..2similar to Saccharomy                | orf19.1507  | 18994 | CaALS2     | Other virulence attributes                                                                                              |
| CA0413 | 5.8  | 3.2 | 3.2  | 1.5 | ALS2       | 2649386..2agglutinin-like protein,             | orf19.2122  | 4068  | IPF4068    | No significant S.c. match                                                                                               |
| CA0414 | 1.2  | 1.1 | 1.0  | 1.0 | IPF4068    | complemer reverse transcriptase                | orf19.2164  | 16160 | CaFRP3     | C-compour transporter activity                                                                                          |
| CA0415 | 14.6 | 7.9 | 26.4 | 4.5 | FRP3       | 2666833..2 member of the FRP fa                | orf19.1224  | 17492 | IPF17492   | No significant S.c. match                                                                                               |
| CA0416 | 1.0  | 1.1 |      | 0.9 | IPF17492   | complemer unknown function                     | orf19.1225  | 6529  | CaUBC13    | PROTEIN FATE [folding modification destination]                                                                         |
| CA0417 | 0.6  | 0.9 | 1.0  | 1.1 | UBC13      | 2678425..2E2 ubiquitin-conjugatin              | orf19.2225  | 9051  | IPF9051.5f | CELL CYCLE AND DNA PROCESSING ""PROTEIN FATE [folding modification destination] ""CONTROL OF CELLULAR ORG.              |
| CA0418 | 1.0  | 0.9 | 1.3  | 1.0 | IPF9051.5f | complemer unknown function, 5-pr               | orf19.2227  | 19864 | IPF19864   | CELL FATI protein binding                                                                                               |
| CA0419 | 1.4  | 0.9 | 1.0  | 0.7 | IPF19864   | 2683154..2unknown function                     | orf19.2228  | 9048  | IPF9048    | UNCLASSI molecular_function unknown                                                                                     |
| CA0420 | 1.1  | 0.9 | 1.2  | 1.0 | IPF9048    | complemer unknown function                     | orf19.2229  | 9047  | IPF9047    | UNCLASSI DNA binding,transcription regulator activity                                                                   |
| CA0421 | 1.2  | 0.9 | 0.7  | 1.2 | IPF9047    | 2686402..2unknown function                     | orf19.2230  | 9046  | IPF9046    | No significant S.c. match                                                                                               |
| CA0422 | 0.9  | 0.9 | 1.0  | 1.2 | IPF9046    | complemer unknown function                     | orf19.2231  | 15273 | IPF15273   | Amino acid metabolism: Nitrogen and sulphur metabolism ""Lipid fatty-acid and isoprenoid metabolism ""CELL CYCLE AND DI |
| CA0423 | 0.6  | 0.8 | 0.7  | 1.1 | IPF15273   | complemer unknown function                     | orf19.9381  | 10795 | IPF10795   | TRANSCRIPTION ""CELL RESCUE DEFENSE AND VIRULENCE ""REGULATION OF/INTERACTION WITH CELLULAR ENV                         |
| CA0424 | 1.1  | 0.9 | 1.2  | 1.0 | IPF10795   | complemer putative transcription f             | orf19.2356  | 11679 | CaPPH21    | C-compour protein phosphatase activity                                                                                  |
| CA0425 | 0.8  | 0.9 |      | 1.1 | PPH21      | 2710813..2 protein ser/thr phosph              | orf19.9252  | 11996 | CaCFT1     | TRANSCR RNA binding                                                                                                     |
| CA0426 | 0.9  | 1.0 | 1.0  | 0.8 | CFT1       | complemer pre-mRNA 3 -end proc                 | orf19.2760  | 11995 | IPF11995   | Lipid fatty-t transferase activity                                                                                      |
| CA0427 | 1.0  | 1.0 | 0.9  | 0.9 | IPF11995   | 2720571..2unknown function                     | orf19.2761  | 14829 | CaILV2     | Amino acid transferase activity                                                                                         |
| CA0428 | 1.8  | 1.0 | 1.2  | 0.8 | ILV2       | 2723926..2acetolactate synthase                | orf19.1613  | 14827 | IPF14827   | No significant S.c. match                                                                                               |
| CA0429 | 1.0  | 1.0 | 1.2  | 1.1 | IPF14827   | complemer unknown function                     | orf19.1611  | 7928  | CaPRC1     | PROTEIN I peptidase activity                                                                                            |
| CA0430 | 0.9  | 1.2 | 1.1  | 1.0 | PRC1       | complemer Carboxypeptidase Y pr                | orf19.1339  | 7927  | IPF7927    | C-compour molecular_function unknown                                                                                    |
| CA0431 | 0.9  | 1.2 | 1.0  | 1.0 | IPF7927    | 2734025..2putative aldose reduct               | orf19.1340  | 7926  | IPF7926    | CLASSIFICATION NOT YET CLEAR-CUT                                                                                        |
| CA0432 | 1.3  | 1.1 | 0.9  | 0.8 | IPF7926    | 2735092..2putative protein kinase              | orf19.1341  | 7924  | CaSHM1     | Nucleotide transferase activity                                                                                         |
| CA0433 | 0.9  | 1.1 | 1.1  | 1.0 | SHM1       | 2736327..2Serine hydroxymethylt                | orf19.1342  | 13577 | IPF13577   | No significant S.c. match                                                                                               |
| CA0434 | 1.0  | 0.8 | 1.2  | 1.0 | IPF13577   | complemer unknown function                     | orf19.9303  | 15411 | CaUGP1     | C-compour nucleotidyltransferase activity                                                                               |
| CA0435 | 0.7  | 1.0 | 0.9  | 1.1 | UGP1       | 2743481..2UTP--glucose-1-phosp                 | orf19.9305  | 15412 | CaRBL2     | CELL CYC chaperone activity                                                                                             |
| CA0436 | 0.8  | 1.0 | 0.9  | 1.0 | RBL2       | complemer Beta-tubulin binding protein (by hom |             | 15414 | CaDIT1     | CELL FATE                                                                                                               |
| CA0437 | 1.0  | 1.0 | 0.9  | 1.0 | DIT1       | complemer Spore wall maturation                | orf19.9308  | 19618 | CaSTE4.5e  | CELLULAF hydrolase activity                                                                                             |
| CA0438 | 0.9  | 0.9 | 1.1  | 1.1 | STE4.5EO   | complemer GTP-binding protein b                | orf19.8419  | 12478 | IPF12478   | UNCLASSI molecular_function unknown                                                                                     |
| CA0439 | 1.1  | 1.3 | 1.1  | 1.0 | IPF12478   | 2757659..2unknown function                     | orf19.13015 |       |            |                                                                                                                         |

|        |     |     |     |     |            |                                          |             |       |            |                                                                                                                   |
|--------|-----|-----|-----|-----|------------|------------------------------------------|-------------|-------|------------|-------------------------------------------------------------------------------------------------------------------|
| CA0440 | 1.3 | 1.5 | 0.9 | 1.0 | IPF12473   | 2759972..2 unknown function              | orf19.5571  | 12473 | IPF12473   | No significant S.c. match                                                                                         |
| CA0441 | 1.2 | 0.9 | 1.0 | 1.2 | IPF12472   | complemer unknown function               | orf19.13018 | 12472 | IPF12472   | C-compound and carbohydrate metabolism ""PROTEIN FATE [folding modification destination] ""CONTROL OF CELLULAR OF |
| CA0442 | 4.0 | 3.9 | 2.4 | 1.8 | IFC4       | 2766149..2 unknown function              | orf19.2292  | 12066 | CaIFC4     | TRANSPORT FACILITATION                                                                                            |
| CA0443 | 2.0 | 1.1 | 1.2 | 0.8 | SPB1       | complemer Putative methyltransferase     | orf19.7727  | 19691 | CaSPB1     | TRANSCR transferase activity                                                                                      |
| CA0444 | 1.0 | 1.4 | 1.1 | 0.9 | IPF17429.5 | complemer similar to Saccharomyces       | orf19.75    | 16249 | IPF17429.5 | CELLULAF molecular_function unknown                                                                               |
| CA0445 | 1.5 | 1.0 | 1.3 | 1.0 | IPF17429.5 | complemer similar to Saccharomyces       | orf19.7725  | 17429 | IPF17429.5 | UNCLASSIFIED PROTEINS                                                                                             |
| CA0446 | 5.1 | 3.5 | 2.6 | 1.1 | IPF14282   | complemer Similar to mucin protein       | orf19.2296  | 14282 | IPF14282   | No significant S.c. match                                                                                         |
| CA0447 | 0.9 | 1.1 | 0.9 | 1.1 | IPF14275   | complemer Probable ADP-ribosylase        | orf19.2297  | 14275 | IPF14275   | PROTEIN Hydrolase activity                                                                                        |
| CA0448 | 0.2 | 0.1 | 0.1 | 0.1 | ALS10      | 2802350..2 agglutinin like protein       | orf19.2355  | 12997 | CaALS10    | CELL FATE SUBCELLULAR LOCALISATION Other virulence attributes                                                     |
| CA0449 | 1.0 | 1.0 | 1.1 | 0.9 | MOT2.3     | complemer transcriptional repressor      | orf19.2379  | 9357  | CaMOT2.3   | UNCLASSI transcription regulator activity                                                                         |
| CA0450 | 0.7 | 0.9 | 1.1 | 0.9 | IPF9353    | 2818634..2 unknown function              | orf19.2378  | 9353  | IPF9353    | TRANSPO molecular_function unknown                                                                                |
| CA0451 | 1.0 | 0.8 | 1.1 | 1.1 | IPF13556   | 2822970..2 unknown function              | orf19.8882  | 13556 | IPF13556   | No significant S.c. match                                                                                         |
| CA0452 | 1.0 | 1.0 | 1.2 | 1.1 | IPF13554   | 2824363..2 Hypothetical acidic protein   | orf19.8881  | 13554 | IPF13554   | UNCLASSIFIED PROTEINS                                                                                             |
| CA0453 | 1.0 | 0.7 | 1.0 | 1.1 | IPF13552   | complemer putative methyltransferase     | orf19.8880  | 13552 | IPF13552   | UNCLASSI transferase activity                                                                                     |
| CA0454 | 0.6 | 1.1 | 1.0 | 1.0 | RPN6       | 2826397..2 subunit of the regulator      | orf19.8879  | 13551 | CaRPN6     | PROTEIN I structural molecule activity                                                                            |
| CA0455 | 1.2 | 1.0 |     | 1.1 | TCA5A      | 2830521..2 polypeptide of Tca5 ret       | orf19.2427  | 11655 | CaTca5a    | UNCLASSIFIED PROTEINS                                                                                             |
| CA0457 | 1.7 |     | 0.9 | 1.4 | IPF15604   | 2842182..2 transcription factor (by      | orf19.2432  | 15604 | IPF15604   | Lipid fatty-acid transcription regulator activity                                                                 |
| CA0458 | 1.2 | 1.0 | 1.1 | 1.1 | IPF15601   | 2843873..2 unknown function              | orf19.2433  | 15601 | IPF15601   | No significant S.c. match                                                                                         |
| CA0459 | 0.8 | 0.8 | 1.1 | 1.1 | HOL3       | 2846242..2 member of major facilitator   | orf19.2517  | 4969  | CaHOL3     | CELL RESCUE DEFENSE AND VIRULENCE ""TRANSPORT FACILITATION                                                        |
| CA0460 | 0.9 | 0.9 |     | 0.9 | SEC17      | complemer transport vesicle fusin        | orf19.2518  | 4971  | CaSEC17    | CELLULAF transporter activity                                                                                     |
| CA0461 | 0.7 | 0.9 | 1.0 | 1.0 | IPF4972    | 2849425..2 unknown function              | orf19.2519  | 4972  | IPF4972    | CELL CYC molecular_function unknown                                                                               |
| CA0462 | 0.9 | 0.9 | 0.9 | 0.9 | MRPS28     | complemer ribosomal protein (by          | orf19.2520  | 4973  | CaMRPS28   | PROTEIN I RNA binding                                                                                             |
| CA0463 | 0.9 | 1.0 | 0.8 | 1.2 | IPF18979   | complemer unknown function               | orf19.7797  | 18979 | IPF18979   | Metabolism of vitamins cofactors and prosthetic groups                                                            |
| CA0464 | 1.7 | 1.3 | 1.4 | 1.0 | IPF14116   | 2853561..2 unknown function              | orf19.7798  | 14116 | IPF14116   | UNCLASSI hydrolase activity                                                                                       |
| CA0465 | 1.5 | 1.3 |     | 1.0 | IPF14113   | 2856442..2 unknown function              | orf19.7800  | 14113 | IPF14113   | TRANSCR molecular_function unknown                                                                                |
| CA0466 | 1.1 | 0.8 | 1.0 | 0.9 | URA4       | complemer dihydroorotase (by             | orf19.1977  | 8687  | CaURA4     | Nucleotide hydrolase activity                                                                                     |
| CA0467 | 0.8 | 0.9 | 0.9 | 0.9 | TRX2       | complemer thioredoxin (by homolog        | orf19.1976  | 8686  | CaTRX2     | CELL CYCLE AND DNA PROCESSING ""PROTEIN FATE [folding modification destination] ""CELL RESCUE DEFENSE ANI         |
| CA0468 | 0.9 | 1.1 | 1.1 | 1.1 | DIB1       | 2866091..2 Component of the U4/l         | orf19.9531  | 8685  | CaDIB1     | CELL CYC RNA binding                                                                                              |
| CA0469 | 0.7 | 1.1 | 1.0 | 0.9 | IPF18977   | 2869617..2 similar to Saccharomyces      | orf19.2621  | 18977 | IPF18977   | TRANSCR RNA binding                                                                                               |
| CA0470 | 0.7 | 1.1 | 1.2 | 0.9 | YPT32      | complemer small GTP-binding protein      | orf19.2622  | 12928 | CaYPT32    | CELLULAF hydrolase activity                                                                                       |
| CA0471 | 1.8 | 1.3 | 1.2 | 0.8 | ECM22      | complemer putative protein involved      | orf19.2623  | 12926 | CaECM22    | Lipid fatty-acid and isoprenoid metabolism ""TRANSCRIPTION                                                        |
| CA0472 | 1.2 | 0.9 | 0.9 | 1.0 | STL1       | 2879598..2 sugar transporter (by         | orf19.13176 | 19866 | CaSTL1     | C-compour transporter activity                                                                                    |
| CA0473 | 1.1 | 1.0 | 1.1 | 1.0 | GRP1       | 2886031..2 dihydroflavonol-4-reductase   | orf19.12245 | 12888 | CaGRP1     | Metabolism of vitamins cofactors and prosthetic groups                                                            |
| CA0474 | 1.2 | 0.8 | 1.0 | 0.9 | IPF12887   | complemer Putative multidrug protein     | orf19.12244 | 12887 | IPF12887   | TRANSPORT FACILITATION                                                                                            |
| CA0475 | 1.2 | 1.7 | 1.0 | 0.9 | IPF2580    | 2891145..2 unknown function              | orf19.8085  | 2580  | IPF2580    | TRANSCR transcription regulator activity                                                                          |
| CA0476 | 1.2 | 0.9 |     | 1.1 | UBP2       | complemer Ubiquitin-specific protease    | orf19.8088  | 2578  | CaUBP2     | PROTEIN I peptidase activity                                                                                      |
| CA0477 | 1.6 | 1.1 | 1.2 | 1.2 | IPF13839   | 2901451..2 unknown function              | orf19.6017  | 13839 | IPF13839   | No significant S.c. match                                                                                         |
| CA0478 | 1.7 | 0.9 | 1.1 | 0.8 | YAE8       | 2903317..2 GTP-binding protein (by       | orf19.13437 | 13843 | CaYAE8     | PROTEIN I molecular_function unknown                                                                              |
| CA0479 | 0.8 | 1.0 | 0.8 | 1.0 | IPF16191   | 2912423..2 similar to Saccharomyces      | orf19.2630  | 16191 | IPF16191   | CELL CYC protein binding                                                                                          |
| CA0480 | 1.4 | 1.3 | 1.1 | 1.2 | IPF8610    | complemer permease (by homolog           | orf19.2633  | 8610  | IPF8610    | C-compound and carbohydrate metabolism CELLULAR TRANSPORT AND TRANSPORT MECHANISMS SUBCELLULAR LOI                |
| CA0481 | 0.6 | 1.0 | 1.1 | 1.3 | STE14      | 2922192..2 farnesyl cysteine carboxylase | orf19.7766  | 14764 | CaSTE14    | Lipid fatty- transferase activity                                                                                 |
| CA0482 | 1.5 | 1.0 | 1.2 | 0.9 | IPF14763   | complemer delta-12 fatty acid desaturase | orf19.7765  | 14763 | IPF14763   | No significant S.c. match                                                                                         |
| CA0483 | 0.8 | 0.8 | 0.8 | 0.9 | SEC9       | complemer transport protein (by          | orf19.7764  | 19868 | CaSEC9     | CELLULAF transporter activity                                                                                     |
| CA0484 | 1.2 | 1.0 | 1.2 | 1.1 | IPF19622   | 2928945..2 unknown function              | orf19.7762  | 19622 | IPF19622   | No significant S.c. match                                                                                         |
| CA0485 | 1.6 | 0.9 | 0.8 | 0.8 | IPF17574   | 2936416..2 unknown function              | orf19.11038 | 17574 | IPF17574   | UNCLASSI molecular_function unknown                                                                               |
| CA0486 | 0.8 | 1.0 | 1.1 | 1.2 | IPF15540   | 2949943..2 unknown function              | orf19.258   | 13725 | IPF15540   | No significant S.c. match                                                                                         |
| CA0487 | 0.8 | 0.9 | 0.9 | 1.2 | IPF13724   | 2951078..2 unknown function              | orf19.259   | 13724 | IPF13724   | No significant S.c. match                                                                                         |
| CA0488 | 1.1 | 1.2 | 1.0 | 1.2 | SEC59      | complemer Dolichol kinase (by            | orf19.261   | 13722 | CaSEC59    | Lipid fatty- transferase activity                                                                                 |
| CA0489 | 1.4 | 1.0 | 0.9 | 1.2 | IPF6960    | 2957473..2 unknown function              | orf19.2636  | 6960  | IPF6960    | UNCLASSIFIED PROTEINS                                                                                             |
| CA0490 | 0.7 | 1.0 | 0.8 | 0.9 | COS161     | 2958234..2 involved in manganese         | orf19.2637  | 6961  | CaCOS161   | REGULATION OF/INTERACTION WITH CELLULAR ENVIRONMENT SUBCELLULAR LOCALISATION                                      |
| CA0491 | 1.1 | 0.9 | 1.1 | 1.1 | IPF18966   | 2965098..2 unknown function              |             | 18966 | IPF18966   | No significant S.c. match                                                                                         |
| CA0492 | 1.0 | 1.2 | 1.0 | 1.2 | SNU71      | complemer Associated with U1 snRNP       | orf19.9068  | 14405 | CaSNU71    | TRANSCR RNA binding                                                                                               |
| CA0493 | 1.1 | 0.9 | 1.3 | 1.1 | PRP39.3    | 2967769..2 pre-mRNA splicing factor      | orf19.1492  | 14401 | CaPRP39.3  | TRANSCR RNA binding                                                                                               |
| CA0494 | 0.8 | 0.9 | 0.9 | 0.9 | RAD7       | complemer nucleotide excision repair     | orf19.9070  | 14400 | CaRAD7     | CELL CYC DNA binding                                                                                              |
| CA0495 | 2.4 | 1.3 | 6.6 | 3.1 | IPF20056   | 2975622..2 unknown function              | orf19.2659  | 20057 | IPF20056   | UNCLASSI molecular_function unknown                                                                               |
| CA0496 | 1.0 | 1.0 | 1.0 | 1.0 | IPF11644   | complemer unknown function               | orf19.2660  | 11644 | IPF11644   | UNCLASSI transferase activity                                                                                     |
| CA0498 | 1.0 | 0.9 | 1.0 | 1.0 | CTA211.3F  | 2982842..2 transcriptional activator     | orf19.2661  | 11534 | CaCTA211   | No significant S.c. match                                                                                         |
| CA0499 | 1.0 | 1.0 | 1.1 | 1.0 | IFA9       | 2983962..2 unknown function              | orf19.2663  | 11533 | CaIFA9     | Nucleotide metabolism CELL CYCLE AND DNA PROCESSING CELLULAR COMMUNICATION/SIGNAL TRANSDUCTION M                  |
| CA0500 | 1.3 | 1.1 | 1.0 | 1.0 | IPF20058   | 2997081..2 unknown function              | orf19.4793  | 20058 | IPF20058   | UNCLASSI molecular_function unknown                                                                               |
| CA0501 | 1.6 | 1.2 | 1.4 | 1.0 | IPF16501   | complemer unknown function               | orf19.12259 | 16501 | IPF16501   | TRANSCRIPTION CELLULAR TRANSPORT AND TRANSPORT MECHANISMS SUBCELLULAR LOCALISATION                                |
| CA0502 | 0.9 | 1.2 | 1.1 | 1.0 | IPF16761   | 3004358..3 unknown function              | orf19.2664  | 16761 | IPF16761   | TRANSPO molecular_function unknown                                                                                |
| CA0503 | 0.7 | 0.8 | 1.1 | 1.0 | PMT6       | complemer protein mannosyltransferase    | orf19.3802  | 9088  | CaPMT6     | C-compound and carbohydrate metabolism ""PROTEIN FATE [folding modification destination] ""                       |
| CA0504 | 1.0 | 1.1 | 1.1 | 1.0 | IPF16466   | complemer unknown function               | orf19.2778  | 16466 | IPF16466   | UNCLASSI molecular_function unknown                                                                               |
| CA0505 | 1.4 | 0.9 | 0.9 | 0.8 | IPF11988.5 | complemer unknown function, 3-prime end  |             | 18957 | IPF11988.5 | No significant S.c. match                                                                                         |
| CA0506 | 1.0 | 0.9 | 0.8 | 0.9 | IPF11988   | complemer unknown function               | orf19.3626  | 11988 | IPF11988   | Amino acid molecular_function unknown                                                                             |
| CA0507 | 1.4 | 1.1 | 0.9 | 0.8 | IPF11989   | complemer unknown function               | orf19.3625  | 11989 | IPF11989   | PROTEIN FATE [folding modification destination]                                                                   |
| CA0508 | 2.7 | 1.1 | 1.1 | 1.1 | IPF11991   | complemer similar to Saccharomyces       | orf19.11107 | 11991 | IPF11991   | Nucleotide RNA binding                                                                                            |
| CA0509 | 1.7 | 1.3 | 1.3 | 0.9 | CDC24      | 3045005..3 GTP/GDP exchange factor       | orf19.10684 | 19624 | CaCDC24    | CELL CYC signal transducer activity                                                                               |
| CA0510 | 2.3 | 1.3 | 1.2 | 1.1 | ETF1       | 3048333..3 ETF-UBIQUINONE OXIDOREDUCTASE | orf19.10685 | 16916 | CaETF1     | ENERGY oxidoreductase activity                                                                                    |
| CA0511 | 0.7 | 1.2 | 1.0 | 1.1 | IPF13975   | 3057583..3 unknown function              | orf19.4953  | 13975 | IPF13975   | UNCLASSI molecular_function unknown                                                                               |
| CA0512 | 0.8 | 1.0 | 0.8 | 0.9 | VMA16      | complemer H+-ATPase 23 KD subunit        | orf19.4954  | 13974 | CaVMA16    | SUBCELLI transporter activity                                                                                     |

|        |     |     |     |     |           |                                                  |             |       |            |                                                                                                         |
|--------|-----|-----|-----|-----|-----------|--------------------------------------------------|-------------|-------|------------|---------------------------------------------------------------------------------------------------------|
| CA0513 | 0.9 | 1.1 |     | 1.1 | IPF13972  | 3060211..3unknown function                       | orf19.4955  | 13972 | IPF13972   | CELL CYC molecular_function unknown                                                                     |
| CA0514 | 1.2 | 0.9 | 0.7 | 1.2 | BEM1      | 3064900..3bud emergence media                    | orf19.4645  | 13602 | CaBEM1     | CELL CYC protein binding                                                                                |
| CA0516 | 1.0 | 0.9 | 0.9 | 1.0 | IPF11526  | 3073275..3unknown function                       | orf19.2804  | 11526 | IPF11526   | No significant S.c. match                                                                               |
| CA0517 | 0.9 | 0.9 | 0.9 | 1.0 | HEM13     | complemer by homology S. cerev.                  | orf19.2803  | 11525 | CaHEM13    | Metabolism oxidoreductase activity                                                                      |
| CA0519 | 0.8 | 0.9 | 0.7 | 1.0 | MRPL10.3  | 3081012..3ribosomal protein, 3-pr                | orf19.11016 | 19871 | CaMRPL10   | PROTEIN structural molecule activity                                                                    |
| CA0520 | 1.2 | 0.9 | 1.0 | 0.8 | IPF4466   | complemer unknown function                       | orf19.3531  | 4466  | IPF4466    | UNCLASSIFIED PROTEINS                                                                                   |
| CA0521 | 0.8 | 0.9 | 1.0 | 1.0 | CKA2      | 3083229..3casein kinase II alpha                 | orf19.3530  | 4465  | CaCKA2     | CELL CYC protein kinase activity                                                                        |
| CA0522 | 0.6 | 1.0 | 0.9 | 1.1 | IPF4463   | complemer unknown function                       | orf19.11013 | 4463  | IPF4463    | CELLULAR TRANSPORT AND TRANSPORT MECHANISMS SUBCELLULAR LOCALISATION TRANSPORT FACILITATION             |
| CA0523 | 0.8 | 1.0 | 0.9 | 1.0 | IPF4459   | 3087654..3unknown function                       | orf19.11012 | 4459  | IPF4459    | UNCLASSIFIED molecular_function unknown                                                                 |
| CA0524 | 1.0 | 1.7 | 1.3 | 1.2 | CYT12     | 3089174..3cytochrome-c1 (by hon                  | orf19.11011 | 18952 | CaCYT12    | ENERGY SUBCELLULAR LOCALISATION                                                                         |
| CA0525 | 1.0 | 0.9 | 1.2 | 1.0 | MSB1      | 3093273..3Morphogenesis-related                  | orf19.8726  | 6172  | CaMSB1     | CELL FATImolecular_function unknown                                                                     |
| CA0526 | 1.4 | 1.1 | 1.4 | 0.9 | BUB3      | complemer cell cycle arrest protei               | orf19.2655  | 10586 | CaBUB3     | CELL CYC molecular_function unknown                                                                     |
| CA0528 | 1.3 | 1.3 | 1.0 | 1.1 | ANP1      | complemer Golgi mannosyltransfe                  | orf19.3622  | 5178  | CaANP1     | PROTEIN transferase activity                                                                            |
| CA0529 | 0.9 | 0.9 | 1.0 | 0.9 | SMC2      | complemer chromosome segregat                    | orf19.3623  | 11993 | CaSMC2     | CELL CYC DNA binding                                                                                    |
| CA0530 | 1.5 | 1.0 | 1.1 | 1.5 | IPF19633  | 3132995..3similar to Saccharomy                  | orf19.8685  | 19634 | IPF19633   | TRANSCR RNA binding                                                                                     |
| CA0531 | 0.7 | 0.9 | 1.0 | 1.2 | UBC1      | 3139627..3ubiquitin-conjugating e                | orf19.8686  | 10066 | CaUBC1     | PROTEIN FATE [folding modification destination] ""CELLULAR TRANSPORT AND TRANSPORT MECHANISMS CELL FATE |
| CA0532 | 1.1 | 1.1 | 0.9 | 1.1 | IRE1      | 3142571..3protein kinase (by hom                 | orf19.5068  | 16157 | CaIRE1     | Lipid fatty-εprotein kinase activity                                                                    |
| CA0533 | 0.9 | 1.0 | 1.0 | 1.1 | IPF19872  | complemer unknown function                       | orf19.5067  | 19872 | IPF19872   | UNCLASSIFIED molecular_function unknown                                                                 |
| CA0534 | 0.6 | 1.0 | 0.9 | 0.8 | IPF15607  | 3147427..3unknown function                       | orf19.5066  | 15607 | IPF15607   | UNCLASSIFIED molecular_function unknown                                                                 |
| CA0535 | 1.1 | 0.8 | 1.0 | 0.9 | IPF15606  | 3150263..3similar to Saccharomy                  | orf19.5065  | 15606 | IPF15606   | PROTEIN Imolecular_function unknown                                                                     |
| CA0536 | 0.9 | 1.0 | 1.2 | 0.9 | PANC.3    | 3153095..3pantothenate syntheta:                 | orf19.2815  | 18946 | CaPANC.3   | Metabolism ligase activity                                                                              |
| CA0537 | 1.1 | 1.0 | 0.9 | 0.8 | PRP16     | complemer RNA-dependent ATPa:                    | orf19.2818  | 19698 | CaPRP16    | TRANSCR RNA binding,helicase activity                                                                   |
| CA0538 | 0.8 | 0.9 | 1.0 | 1.1 | IPF10901  | 3157112..3unknown function                       | orf19.2819  | 10901 | IPF10901   | No significant S.c. match                                                                               |
| CA0539 | 0.8 | 0.8 | 0.8 | 1.0 | NUP57     | complemer nuclear pore protein (b                | orf19.2820  | 10900 | CaNUP57    | CELLULAFstructural molecule activity                                                                    |
| CA0540 | 1.1 | 1.3 | 0.9 | 1.2 | IPF10896  | complemer NADH dehydrogenase                     | orf19.2821  | 10896 | IPF10896   | No significant S.c. match                                                                               |
| CA0541 | 1.2 | 0.8 | 0.7 | 1.0 | IPF14574  | complemer unknown function                       | orf19.1083  | 14574 | IPF14574   | UNCLASSIFIED molecular_function unknown                                                                 |
| CA0543 | 1.3 | 0.9 | 0.8 | 1.0 | IPF3255   | complemer similar to Saccharomy                  | orf19.2867  | 3255  | IPF3255    | PROTEIN transporter activity                                                                            |
| CA0544 | 0.9 | 1.0 | 1.0 | 1.1 | IPF3252   | 3175336..3unknown function                       | orf19.2868  | 3252  | IPF3252    | No significant S.c. match                                                                               |
| CA0545 | 0.9 | 1.0 | 0.9 | 0.9 | IPF3251   | 3176156..3unknown function                       | orf19.2869  | 3251  | IPF3251    | No significant S.c. match                                                                               |
| CA0546 | 1.0 | 1.3 | 1.1 | 1.0 | IPF3250   | 3176959..3unknown function                       | orf19.2870  | 3250  | IPF3250    | No significant S.c. match                                                                               |
| CA0548 | 0.9 | 1.1 | 1.0 | 1.1 | PHO87     | 3183582..3Member of the phosph                   | orf19.2454  | 14853 | CaPHO87    | Phosphate transporter activity                                                                          |
| CA0549 | 1.0 | 1.1 | 1.2 | 0.9 | IPF14031  | 3188241..3putative secreted aspa                 | orf19.852   | 14031 | IPF14031   | PROTEIN FATE [folding modification destination] ""SUBCELLULAR LOCALISATION                              |
| CA0550 | 1.5 | 1.4 | 1.4 | 1.1 | IPF14030  | complemer unknown function                       | orf19.851   | 14030 | IPF14030   | PROTEIN FATE [folding modification destination]                                                         |
| CA0551 | 1.0 | 1.0 | 0.9 | 0.7 | CDC37     | complemer Cell division control pr               | orf19.5531  | 4339  | CaCDC37    | CELL CYC chaperone activity                                                                             |
| CA0552 | 1.3 | 1.0 | 0.9 | 0.8 | IPF4343   | complemer similar to Saccharomy                  | orf19.5533  | 4343  | IPF4343    | PROTEIN enzyme regulator activity                                                                       |
| CA0553 | 1.1 | 1.2 | 1.0 | 0.9 | IPF16653  | complemer unknown function                       | orf19.5534  | 16653 | IPF16653   | UNCLASSIFIED molecular_function unknown                                                                 |
| CA0554 | 1.4 | 1.1 | 1.0 | 1.1 | HAS1      | 3205905..3ATP-DEPENDENT RN                       | orf19.11444 | 5784  | CaHAS1     | CELL CYC molecular_function unknown                                                                     |
| CA0555 | 0.8 | 1.0 | 1.0 | 0.9 | HYS2      | 3207834..3DNA-directed DNA pol                   | orf19.3960  | 5785  | CaHYS2     | CELL CYC nucleotidyltransferase activity                                                                |
| CA0556 | 1.0 | 0.8 | 1.1 | 0.9 | IPF15920  | complemer zinc-finger containing                 | orf19.4972  | 15920 | IPF15920   | TRANSCRIPTION SUBCELLULAR LOCALISATION                                                                  |
| CA0557 | 0.6 | 0.9 | 0.9 | 0.9 | HYR1.53   | 3223440..3Hyphally regulated protein, internal f |             | 7957  | CaHYR1.53  | Hypha-specific No significant S.c. match                                                                |
| CA0558 | 0.5 | 0.3 | 0.5 | 0.7 | GPX2      | 3225137..3glutathione peroxidase                 | orf19.85    | 13205 | CaGPX2     | CELL RESCUE DEFENSE AND VIRULENCE                                                                       |
| CA0559 | 0.6 | 0.9 | 1.1 | 0.9 | GPX1      | 3227250..3glutathione peroxidase                 | orf19.86    | 13207 | CaGPX1     | CELL RES oxidoreductase activity                                                                        |
| CA0560 | 0.9 | 0.9 | 1.1 | 0.9 | GPX3      | 3229232..3glutathione peroxidase                 | orf19.87    | 13211 | CaGPX3     | CELL RESCUE DEFENSE AND VIRULENCE                                                                       |
| CA0561 | 0.8 | 1.0 | 1.0 | 1.0 | CIN4      | complemer GTP-binding protein                    | orf19.2925  | 15237 | CaCIN4     | CELL CYCLE AND DNA PROCESSING SUBCELLULAR LOCALISATION                                                  |
| CA0562 | 1.2 | 0.9 | 1.1 | 1.0 | PSO2      | 3232781..3Interstrand crosslink re               | orf19.2926  | 15236 | CaPSO2     | CELL CYC DNA binding                                                                                    |
| CA0563 | 0.7 | 1.2 | 0.9 | 1.1 | MNN11     | complemer Mannosyltransferase c                  | orf19.2927  | 14216 | CaMNN11    | PROTEIN transferase activity                                                                            |
| CA0565 | 0.6 | 1.8 | 1.0 | 1.0 | IPF13526  | complemer unknown function                       | orf19.6250  | 13526 | IPF13526   | CELLULAFmolecular_function unknown                                                                      |
| CA0566 | 0.8 | 1.0 | 1.2 | 1.1 | IPF13522  | 3242173..3unknown function                       | orf19.6252  | 13522 | IPF13522   | SUBCELLLLtranscription regulator activity                                                               |
| CA0567 | 0.3 | 0.8 | 0.4 | 1.3 | RPS23     | complemer Ribosomal protein S23                  | orf19.13632 | 13519 | CaRPS23    | PROTEIN structural molecule activity                                                                    |
| CA0568 | 0.7 | 1.0 | 1.0 | 0.9 | APS2      | 3246330..3AP-2 complex subunit,                  | orf19.8729  | 16570 | CaAPS2     | PROTEIN Imolecular_function unknown                                                                     |
| CA0569 | 0.7 | 0.8 | 0.9 | 1.2 | CDC8      | complemer dTMP kinase (by hom                    | orf19.8730  | 16571 | CaCDC8     | Nucleotide transferase activity                                                                         |
| CA0570 | 0.7 | 0.7 | 0.8 | 0.8 | SVL3      | 3250629..3Involved in vacuole fu                 | orf19.8732  | 17015 | CaSVL3     | CELL FATImolecular_function unknown                                                                     |
| CA0571 | 0.9 | 1.0 | 0.9 | 0.9 | CDC43     | 3256714..3geranylgeranyltransfer                 | orf19.9369  | 14866 | CaCDC43    | Lipid fatty-εsignal transducer activity                                                                 |
| CA0572 | 0.6 | 0.9 | 0.9 | 1.2 | IPF14864  | 3258387..3unknown function                       | orf19.9370  | 18938 | IPF14864   | CELLULAFtransporter activity                                                                            |
| CA0573 | 1.1 | 1.5 |     | 1.4 | PEX14     | 3259960..3peroxisomal protein (b                 | orf19.9371  | 15186 | CaPEX14    | PROTEIN Iprotein binding                                                                                |
| CA0574 | 0.6 | 0.7 | 1.0 | 1.3 | IPF15183  | 3262553..3unknown function                       | orf19.9373  | 15183 | IPF15183   | No significant S.c. match                                                                               |
| CA0575 | 1.0 | 1.0 | 1.2 | 1.1 | IPF15178  | 3264478..3Unknown function                       | orf19.1808  | 15178 | IPF15178   | No significant S.c. match                                                                               |
| CA0576 | 1.0 | 1.0 | 1.3 | 0.9 | NPR1      | 3271396..3nitrogen permease rea                  | orf19.6232  | 12521 | CaNPR1     | Nitrogen and sulphur metabolism CELLULAR TRANSPORT AND TRANSPORT MECHANISMS                             |
| CA0577 | 1.1 | 0.8 | 0.9 | 1.0 | IPF16051  | 3276393..3unknown function                       | orf19.3068  | 16051 | IPF16051   | TRANSCRIPTION                                                                                           |
| CA0578 | 1.3 | 1.1 | 0.9 | 1.1 | IPF9605   | 3283180..3similar to Saccharomy                  | orf19.3071  | 9605  | IPF9605    | CELL CYC protein phosphatase activity                                                                   |
| CA0579 | 1.0 | 1.0 | 1.0 | 0.9 | IPF3184.E | 3296789..3unknown function, exo                  | orf19.3560  | 3184  | IPF3184.ex | UNCLASSIFIED PROTEINS                                                                                   |
| CA0580 | 0.7 | 0.8 | 0.8 | 0.9 | IPF3184.E | 3297542..3unknown function, exo                  | orf19.3559  | 3182  | IPF3184.ex | UNCLASSIFIED structural molecule activity                                                               |
| CA0581 | 0.5 | 0.8 | 0.7 | 0.8 | IPF3181   | 3298373..3similar to Saccharomy                  | orf19.3558  | 3181  | IPF3181    | CELLULAFmolecular_function unknown                                                                      |
| CA0582 | 1.0 | 0.8 | 1.0 | 0.9 | IPF3180   | 3299065..3unknown function                       | orf19.11041 | 3180  | IPF3180    | UNCLASSIFIED molecular_function unknown                                                                 |
| CA0583 | 1.4 | 1.0 | 1.0 | 1.2 | GSH1.EXC  | complemer gamma-glutamylcyste                    | orf19.12526 | 12218 | CaGSH1.e   | CELL RES ligase activity                                                                                |
| CA0584 | 0.9 | 1.0 | 1.0 | 1.0 | GSH1.EXC  | complemer Gamma-glutamylcyste                    | orf19.12527 | 18932 | CaGSH1.e   | CELL RESCUE DEFENSE AND VIRULENCE                                                                       |
| CA0585 | 1.3 | 1.5 | 1.1 | 1.2 | ADE5.7    | complemer phosphoribosylamine-ε                  | orf19.12528 | 13495 | CaADE5.7   | Nucleotide ligase activity                                                                              |
| CA0586 | 1.5 | 0.7 | 0.7 | 0.8 | IPF13493  | 3310418..3Unknown function                       | orf19.12529 | 17932 | IPF13493   | PROTEIN FATE [folding modification destination] ""CELLULAR TRANSPORT AND TRANSPORT MECHANISMS SUBCELLUL |
| CA0587 | 1.5 | 1.6 | 0.8 | 1.0 | SPO14.5E  | complemer phospholipase D, 5-pri                 | orf19.8753  | 13085 | CaSPO14.5  | Lipid fatty-εhydrolase activity                                                                         |
| CA0588 | 0.9 | 1.0 | 1.0 | 1.1 | IPF13081  | complemer unknown function                       | orf19.1162  | 13081 | IPF13081   | No significant S.c. match                                                                               |
| CA0589 | 1.5 | 1.1 | 1.0 | 0.8 | IPF13080  | complemer unknown function                       |             | 13080 | IPF13080   | UNCLASSIFIED PROTEINS                                                                                   |



|        |     |     |     |     |            |                                              |             |       |            |                                                     |                                                                  |         |
|--------|-----|-----|-----|-----|------------|----------------------------------------------|-------------|-------|------------|-----------------------------------------------------|------------------------------------------------------------------|---------|
| CA0590 | 1.3 | 1.1 |     | 1.0 | IPF13079   | 3317420..3unknown function                   | orf19.8756  | 13079 | IPF13079   | UNCLASSI                                            | molecular_function                                               | unknown |
| CA0591 | 1.5 | 1.1 | 1.1 | 0.9 | ALS3.5E0I  | complemer agglutinin-like protein,           | orf19.1816  | 12561 | CaALS3.5e  | CELL FAT                                            | signal transducer activity                                       |         |
| CA0592 | 0.8 | 0.9 | 1.0 | 1.2 | IPF8862    | complemer unknown function                   | orf19.12370 | 8862  | IPF8862    | No significant S.c. match                           |                                                                  |         |
| CA0593 | 1.1 | 0.9 | 1.0 | 1.0 | ARP6       | 3333180..3actin-related protein (b           | orf19.4904  | 8861  | CaARP6     | SUBCELLL                                            | molecular_function                                               | unknown |
| CA0594 | 1.0 | 0.9 | 1.0 | 0.9 | IPF8860    | complemer similar to Saccharomy              | orf19.12368 | 8860  | IPF8860    | Lipid fatty- $\epsilon$                             | hydrolase activity                                               |         |
| CA0595 | 0.9 | 1.0 |     | 1.2 | IPF8856    | complemer unknown function                   | orf19.12367 | 8856  | IPF8856    | UNCLASSIFIED                                        | PROTEINS                                                         |         |
| CA0596 | 1.3 | 1.0 | 1.2 | 0.9 | IPF9706    | 3349430..3unknown function                   | orf19.12346 | 9706  | IPF9706    | UNCLASSI                                            | molecular_function                                               | unknown |
| CA0597 | 1.0 | 1.0 | 0.8 | 0.9 | IPF9704    | 3352289..3similar to Saccharomy              | orf19.12345 | 9704  | IPF9704    | TRANSCR                                             | transcription regulator activity                                 |         |
| CA0598 | 1.2 | 1.0 | 1.0 | 0.7 | IPF9703    | complemer unknown function                   | orf19.12344 | 9703  | IPF9703    | No significant S.c. match                           |                                                                  |         |
| CA0599 | 1.0 | 1.3 | 1.1 | 1.0 | IPF12428   | 3357819..3unknown function                   | orf19.10184 | 12428 | IPF12428   | UNCLASSI                                            | RNA binding                                                      |         |
| CA0600 | 1.9 | 1.3 | 1.6 | 1.0 | MSN5.5F    | 3359459..3 Importin-beta family m            | orf19.2666  | 12426 | CaMSN5.5   | CELLULAF                                            | protein binding                                                  |         |
| CA0601 | 1.7 | 0.9 | 1.1 | 0.9 | MSN5.3F    | 3361884..3 Importin-beta family m            | orf19.10182 | 18929 | CaMSN5.3   | CELLULAR TRANSPORT AND TRANSPORT MECHANISMS         | CELL FATE                                                        |         |
| CA0602 | 0.6 | 1.0 | 0.5 | 0.8 | CTA22      | 3369449..3Protein with putative tr           | orf19.3074  | 1708  | CaCTA22    | No significant S.c. match                           |                                                                  |         |
| CA0603 | 1.1 | 1.0 | 1.0 | 0.8 | IPF1709    | complemer unknown function                   | orf19.3076  | 1709  | IPF1709    | CLASSIFIC                                           | molecular_function                                               | unknown |
| CA0604 | 0.7 | 1.1 | 0.8 | 1.1 | VID21      | 3370884..3unknown function                   | orf19.3077  | 1713  | CaVID21    | UNCLASSI                                            | molecular_function                                               | unknown |
| CA0605 | 1.0 | 1.1 | 0.9 | 1.0 | UTR2       | 3376805..31,3-1,4-beta-glucanase             | orf19.9240  | 8080  | CaUTR2     | CONTROL                                             | molecular_function                                               | unknown |
| CA0606 | 1.3 | 1.1 | 0.9 | 0.8 | COP1       | 3378711..3coatomer complex alpt              | orf19.9241  | 8079  | CaCOP1     | CELLULAF                                            | molecular_function                                               | unknown |
| CA0609 | 3.0 | 3.9 | 2.0 | 1.8 | CDR11.3F   | complemer multidrug resistance pr            | orf19.919   | 12978 | CaCDR11.   | Lipid fatty-acid and isoprenoid metabolism          | """"CELL RESCUE DEFENSE AND VIRULENCE ""REGULATION OF/INTERACTIO |         |
| CA0610 | 3.4 | 2.4 | 2.6 | 1.1 | CDR11.5F   | complemer multidrug resistance pr            | orf19.8533  | 12975 | CaCDR11.   | Lipid fatty-acid and isoprenoid metabolism          | """"CELL RESCUE DEFENSE AND VIRULENCE ""REGULATION OF/INTERACTIO |         |
| CA0611 | 1.1 | 1.0 | 0.8 | 1.1 | IPF17542   | 3400215..3unknown function                   | orf19.13024 | 17542 | IPF17542   | No significant S.c. match                           |                                                                  |         |
| CA0612 | 1.5 | 1.0 | 0.9 | 0.9 | IPF17545   | complemer unknown function                   | orf19.5579  | 17545 | IPF17545   | No significant S.c. match                           |                                                                  |         |
| CA0614 | 1.4 | 1.1 | 1.0 | 0.9 | IPF19700   | 3410866..3unknown function                   | orf19.1600  | 19700 | IPF19700   | No significant S.c. match                           |                                                                  |         |
| CA0615 | 0.3 | 0.8 | 0.7 | 1.3 | RPL3       | 3413519..360S large subunit ribos            | orf19.1601  | 6742  | CaRPL3     | PROTEIN                                             | structural molecule activity                                     |         |
| CA0616 | 1.2 | 1.0 | 0.9 | 1.1 | PHO11      | complemer Secreted acid phosph               | orf19.2619  | 7796  | CaPHO11    | Phosphate                                           | hydrolase activity                                               |         |
| CA0617 | 0.7 | 1.1 | 1.0 | 1.0 | MET2       | complemer Homoserine O-acetyltr              | orf19.2618  | 7797  | CaMET2     | Amino acid transferase activity                     |                                                                  |         |
| CA0618 | 1.3 | 1.0 | 1.1 | 0.8 | UGT51      | complemer UDP-glucose:sterol gl              | orf19.2616  | 7800  | CaUGT51    | Lipid fatty- $\epsilon$                             | transferase activity                                             |         |
| CA0619 | 0.6 | 1.0 | 1.1 | 0.9 | IPF18924   | 3427421..3unknown function                   | orf19.3146  | 18924 | IPF18924   | No significant S.c. match                           |                                                                  |         |
| CA0620 | 0.9 | 1.0 | 0.8 | 1.0 | IPF17998   | 3428371..3unknown function                   | orf19.3147  | 17998 | IPF17998   | No significant S.c. match                           |                                                                  |         |
| CA0621 | 2.0 | 1.0 | 1.0 | 0.9 | IPF17999   | complemer unknown function                   | orf19.3148  | 17999 | IPF17999   | No significant S.c. match                           |                                                                  |         |
| CA0622 | 0.3 | 0.8 | 0.5 | 0.4 | IPF14171   | complemer unknown function                   | orf19.3149  | 14171 | IPF14171   | UNCLASSI                                            | molecular_function                                               | unknown |
| CA0623 | 0.7 | 1.3 | 1.0 | 0.9 | MSS4.3     | 3440139..3phosphatidylinositol-4-            | orf19.3153  | 15141 | CaMSS4.3   | Lipid fatty- $\epsilon$                             | transferase activity                                             |         |
| CA0624 | 0.7 | 1.1 | 0.9 | 1.2 | IPF312     | 3442861..3unknown function                   | orf19.3154  | 15139 | IPF312     | UNCLASSI                                            | molecular_function                                               | unknown |
| CA0625 | 1.4 | 0.9 | 1.0 | 0.8 | IPF19637   | 3448212..3unknown function                   |             | 19638 | IPF19637   | No significant S.c. match                           |                                                                  |         |
| CA0626 | 0.9 | 0.9 | 1.1 | 0.8 | IPF3161    | complemer Unknown function                   | orf19.3161  | 3161  | IPF3161    | UNCLASSI                                            | transcription regulator activity                                 |         |
| CA0627 | 4.9 | 1.5 | 3.1 | 1.0 | HSP12      | complemer Heat shock protein (by             | orf19.3160  | 3160  | CaHSP12    | C-compour                                           | chaperone activity                                               |         |
| CA0628 | 1.2 | 1.0 | 1.0 | 1.0 | IPF3878    | 3458867..3unknown function                   | orf19.773   | 3878  | IPF3878    | UNCLASSI                                            | molecular_function                                               | unknown |
| CA0629 | 0.8 | 1.3 |     | 1.3 | IPF3876    | 3460112..3unknown function                   | orf19.775   | 3876  | IPF3876    | REGULATION OF/INTERACTION WITH CELLULAR ENVIRONMENT |                                                                  |         |
| CA0630 | 1.5 | 0.8 | 0.8 | 0.8 | IPF3875.5E | 3463174..3unknown function, 5-pr             | orf19.776   | 3875  | IPF3875.5e | CELL CYCLE AND DNA PROCESSING                       | CELL FATE                                                        |         |
| CA0631 | 1.3 | 0.9 |     | 1.1 | IPF11698   | 3468528..3similar to Saccharomy              | orf19.11813 | 11698 | IPF11698   | TRANSPOR                                            | transporter activity                                             |         |
| CA0632 | 0.5 | 0.6 | 0.8 | 0.9 | RPS5       | complemer ribosomal protein S5.e             | orf19.11812 | 11696 | CaRPS5     | PROTEIN                                             | structural molecule activity                                     |         |
| CA0633 | 1.3 | 1.0 | 1.1 | 0.8 | IPF16269   | complemer unknown function                   | orf19.9340  | 16269 | IPF16269   | UNCLASSI                                            | molecular_function                                               | unknown |
| CA0634 | 0.8 | 0.9 | 1.1 | 1.1 | IPF16267   | 3477624..3unknown function                   | orf19.1772  | 16267 | IPF16267   | UNCLASSI                                            | molecular_function                                               | unknown |
| CA0635 | 0.8 | 1.0 | 0.9 | 0.9 | IPF9036    | complemer similar to Saccharomy              | orf19.9342  | 9036  | IPF9036    | Nitrogen ar                                         | DNA binding                                                      |         |
| CA0636 | 1.1 | 1.9 | 1.2 | 0.9 | FDH4.3F    | complemer Formate dehydrogenase, 3-prime er  |             | 18026 | CaFDH4.3f  | ENERGY                                              |                                                                  |         |
| CA0639 | 1.1 | 0.9 | 1.1 | 0.9 | FDH13.3F   | complemer Putative formate dehydrogenase, 3- |             | 18922 | CaFDH13.   | ENERGY                                              |                                                                  |         |
| CA0641 | 2.2 | 1.2 | 0.8 | 0.7 | IPF15977   | complemer unknown function                   | orf19.4698  | 15977 | IPF15977   | No significant S.c. match                           |                                                                  |         |
| CA0642 | 0.5 | 0.4 | 0.8 | 0.9 | ERG25      | complemer C-4 sterol methyl oxide            | orf19.3732  | 9179  | CaERG25    | Lipid fatty- $\epsilon$                             | oxidoreductase activity                                          |         |
| CA0643 | 2.0 | 1.3 | 1.4 | 1.0 | IDP2       | complemer isocitrate dehydrogena             | orf19.3733  | 9177  | CaIDP2     | C-compour                                           | oxidoreductase activity                                          |         |
| CA0644 | 0.8 | 0.9 | 1.1 | 1.1 | IPF17131   | 3520884..3unknown function                   | orf19.69    | 17131 | IPF17131   | No significant S.c. match                           |                                                                  |         |
| CA0645 | 1.7 | 1.0 | 1.0 | 0.9 | IPF18917.† | 3523342..3unknown function, 5-prime end      |             | 18917 | IPF18917.† | PROTEIN FATE [folding modification destination]     | ""CELLULAR TRANSPORT AND TRANSPORT MECHANISMS                    |         |
| CA0646 | 0.4 | 1.0 | 0.9 | 0.9 | IPF19702   | 3524828..3unknown function                   | orf19.11806 | 19702 | IPF19702   | No significant S.c. match                           |                                                                  |         |
| CA0647 | 0.9 | 1.0 | 1.0 | 1.1 | IPF19706   | complemer unknown function                   | orf19.4334  | 19706 | IPF19706   | No significant S.c. match                           |                                                                  |         |
| CA0648 | 0.9 | 0.8 | 0.9 | 0.9 | IPF12399   | 3540983..3unknown function                   | orf19.3210  | 12399 | IPF12399   | No significant S.c. match                           |                                                                  |         |
| CA0649 | 0.9 | 0.8 | 0.9 | 0.8 | RFC3       | complemer DNA replication factor             | orf19.3211  | 12401 | CaRFC3     | CELL CYC                                            | DNA binding                                                      |         |
| CA0650 | 1.6 | 1.0 | 1.0 | 0.8 | IPF11566   | 3546264..3unknown function                   | orf19.11    | 11566 | IPF11566   | No significant S.c. match                           |                                                                  |         |
| CA0651 | 1.2 | 0.9 | 1.3 | 1.0 | ALK8       | 3547768..3n-alkane inducible cytc            | orf19.10    | 11568 | CaALK8     | CELL RESCUE DEFENSE AND VIRULENCE                   | ""CELL FATE CONTROL OF CELLULAR ORGANIZATION                     |         |
| CA0652 | 1.0 | 1.1 | 1.2 | 1.1 | SHP1       | complemer potential regulatory sul           | orf19.10082 | 11553 | CaSHP1     | ENERGY C                                            | molecular_function                                               | unknown |
| CA0653 | 1.0 | 0.8 | 1.2 | 1.3 | MET6       | complemer BY HOMOLOGY TO S                   | orf19.10083 | 11555 | CaMET6     | Amino acid transferase activity                     |                                                                  |         |
| CA0654 | 0.8 | 1.0 | 1.0 | 1.2 | IPF11550.‡ | complemer Ca2+-transporting P-ty             | orf19.10084 | 11557 | IPF11550.‡ | CELLULAR TRANSPORT AND TRANSPORT MECHANISMS         | REGULATION OF/INTERACTION WITH CELLULAR ENVIRON                  |         |
| CA0655 | 0.7 | 0.9 | 1.0 | 1.0 | IPF11560.‡ | complemer Ca2+-transporting P-ty             | orf19.10085 | 11560 | IPF11560.‡ | CELLULAR TRANSPORT AND TRANSPORT MECHANISMS         | REGULATION OF/INTERACTION WITH CELLULAR ENVIRON                  |         |
| CA0656 | 0.8 | 1.0 | 1.0 | 0.9 | IPF12470   | complemer unknown function                   | orf19.5573  | 12470 | IPF12470   | No significant S.c. match                           |                                                                  |         |
| CA0657 | 0.8 | 0.9 | 0.8 | 0.8 | IPF19877   | 3576492..3putative cysteine synth            | orf19.5574  | 19877 | IPF19877   | Amino acid lyase activity                           |                                                                  |         |
| CA0658 | 1.3 | 1.0 | 1.1 | 1.1 | IPF16505   | complemer Unknown function                   | orf19.5575  | 16505 | IPF16505   | UNCLASSI                                            | molecular_function                                               | unknown |
| CA0659 | 1.5 | 1.2 | 1.5 | 1.1 | IPF16189.‡ | complemer panthothenate kinase, 3            | orf19.5576  | 16507 | IPF16189.‡ | UNCLASSIFIED                                        | PROTEINS                                                         |         |
| CA0660 | 0.7 | 1.2 | 1.1 | 0.8 | IPF16189.‡ | complemer panthothenate kinase, 5            | orf19.5577  | 16189 | IPF16189.‡ | UNCLASSI                                            | transferase activity                                             |         |
| CA0661 | 0.8 | 0.9 | 1.0 | 1.0 | APG7       | 3586042..3component of the auto              | orf19.8326  | 12207 | CaAPG7     | CONTROL OF CELLULAR ORGANIZATION                    | SUBCELLULAR LOCALISATION                                         |         |
| CA0662 | 1.0 | 0.9 | 1.0 | 0.9 | SPC97      | 3588160..3spindle pole body com              | orf19.708   | 12206 | CaSPC97    | CELL CYC                                            | structural molecule activity                                     |         |
| CA0663 | 0.5 | 0.8 | 0.8 | 1.1 | PUP2       | complemer 20S proteasome subur               | orf19.709   | 12205 | CaPUP2     | CELL CYC                                            | peptidase activity                                               |         |
| CA0664 | 0.3 | 0.2 | 0.5 | 1.0 | LSC2.3E0I  | complemer succinate-CoA ligase †             | orf19.710   | 12204 | CaLSC2.3e  | C-compour                                           | ligase activity                                                  |         |
| CA0665 | 0.7 | 0.9 | 0.9 | 1.3 | INT1       | 3593265..3integrin-like protein alp          | orf19.11733 | 19580 | CaINT1     | CELL FATE SUBCELLULAR LOCALISATION                  | Other virulence attributes                                       |         |
| CA0666 | 1.4 | 1.0 | 1.1 | 0.8 | FIP1       | 3598777..3Component of pre-mRl               | orf19.11734 | 18911 | CaFIP1     | TRANSCR                                             | RNA binding                                                      |         |

|        |     |     |     |     |           |                                                  |             |       |           |                                                                                      |
|--------|-----|-----|-----|-----|-----------|--------------------------------------------------|-------------|-------|-----------|--------------------------------------------------------------------------------------|
| CA0667 | 1.0 | 1.3 | 0.9 | 1.2 | TIF5      | complemer Translation initiation fa              | orf19.11737 | 15194 | CaTIF5    | PROTEIN (translation regulator activity,enzyme regulator activity                    |
| CA0669 | 0.9 | 1.0 | 0.9 | 1.2 | IPF5918   | 3603864..3 unknown function                      | orf19.448   | 5918  | IPF5918   | UNCLASSI molecular_function unknown                                                  |
| CA0670 | 1.2 | 1.3 | 1.2 | 1.0 | IPF5915   | 3606013..3 phosphatidyl synthase                 | orf19.449   | 5915  | IPF5915   | UNCLASSI molecular_function unknown                                                  |
| CA0671 | 0.5 | 1.0 | 1.0 | 1.0 | GRP4      | complemer putative reductase (by                 | orf19.10660 | 15555 | CaGRP4    | Metabolism of vitamins cofactors and prosthetic groups                               |
| CA0672 | 0.9 | 1.0 | 1.0 | 1.1 | GRP6      | complemer Putative reductase (by                 | orf19.3151  | 15804 | CaGRP6    | Metabolism of vitamins cofactors and prosthetic groups                               |
| CA0673 | 1.2 | 1.3 | 1.5 | 1.1 | AMO2      | complemer amine oxidase (by hon                  | orf19.3152  | 15803 | CaAMO2    | CELL CYCLE AND DNA PROCESSING                                                        |
| CA0674 | 1.0 | 0.9 |     | 1.0 | IPF19608  | complemer unknown function                       | orf19.8770  | 19608 | IPF19608  | No significant S.c. match                                                            |
| CA0675 | 0.8 | 1.1 | 0.9 | 1.2 | IPF13098  | 3623987..3 unknown function                      | orf19.8771  | 13098 | IPF13098  | UNCLASSI molecular_function unknown                                                  |
| CA0676 | 1.2 | 1.1 | 1.0 | 0.8 | IPF13097  | 3625442..3 unknown function                      | orf19.8772  | 13097 | IPF13097  | Lipid fatty-acid and isoprenoid metabolism ""CELL CYCLE AND DNA PROCESSING CELL FATE |
| CA0677 | 0.9 | 1.3 | 1.0 | 1.2 | IPF13095  | complemer unknown function                       | orf19.8773  | 13095 | IPF13095  | CELLULAF transporter activity                                                        |
| CA0678 | 2.5 | 1.5 | 1.4 | 0.9 | IPF13094  | 3627562..3 unknown function                      | orf19.8774  | 13094 | IPF13094  | UNCLASSI molecular_function unknown                                                  |
| CA0679 | 1.3 | 1.2 | 0.9 | 0.9 | IPF13885  | 3629816..3 unknown function, 5-prime end         |             | 13092 | IPF13885  | No significant S.c. match                                                            |
| CA0680 | 0.8 | 1.0 | 1.0 | 0.9 | IPF14511  | 3632428..3 unknown function, 5-pr                | orf19.12169 | 14511 | IPF14511  | UNCLASSI hydrolase activity                                                          |
| CA0681 | 1.0 | 0.8 | 1.0 | 1.1 | IPF14511  | 3633712..3 unknown function, 3-pr                | orf19.12170 | 14513 | IPF14511  | UNCLASSIFIED PROTEINS                                                                |
| CA0682 | 1.0 | 1.2 | 0.9 | 1.0 | IPF14514  | complemer unknown function                       | orf19.12171 | 14514 | IPF14514  | TRANSCR transcription regulator activity                                             |
| CA0683 | 0.8 | 1.1 | 0.9 | 0.9 | IPF14519  | 3636213..3 unknown function                      | orf19.12172 | 14519 | IPF14519  | No significant S.c. match                                                            |
| CA0684 | 1.0 | 1.0 | 0.8 | 1.0 | IPF4450   | complemer unknown function                       | orf19.12173 | 4450  | IPF4450   | No significant S.c. match                                                            |
| CA0685 | 1.0 | 0.8 | 1.0 | 1.0 | ADO1      | complemer adenosine kinase (by l                 | orf19.13037 | 6804  | CaADO1    | Nucleotide transferase activity                                                      |
| CA0686 | 1.9 | 1.2 | 1.3 | 1.0 | IPF162    | complemer sulphate transporter (b                | orf19.3222  | 162   | IPF162    | UNCLASSI molecular_function unknown                                                  |
| CA0687 | 1.9 | 1.2 | 1.4 | 0.9 | CPA2      | 3660069..3 arginine-specific carba               | orf19.3221  | 4967  | CaCPA2    | Amino acid ligase activity                                                           |
| CA0688 | 1.4 | 1.1 | 1.0 | 1.2 | IPF10555  | 3664415..3 unknown function, 3-pr                | orf19.12155 | 18902 | IPF10555  | C-compound and carbohydrate metabolism ENERGY                                        |
| CA0689 | 1.0 | 1.0 | 1.4 | 0.9 | IPF14119  | 3669098..3 unknown function                      | orf19.12157 | 14119 | IPF14119  | No significant S.c. match                                                            |
| CA0690 | 1.1 | 0.7 | 0.9 | 1.2 | IPF18901  | 3671035..3 unknown function, 3-prime end         |             | 18901 | IPF18901  | No significant S.c. match                                                            |
| CA0691 | 1.4 | 1.3 | 1.4 | 1.0 | CIRT4A    | 3682647..3 Transposase (by homc                  | orf19.10357 | 15077 | CaCirt4a  | No significant S.c. match                                                            |
| CA0692 | 1.0 | 1.0 | 1.2 | 1.0 | PGM2      | 3684723..3 Phosphoglucomutase                    | orf19.10359 | 15073 | CaPGM2    | C-compour isomerase activity                                                         |
| CA0693 | 1.6 | 1.2 | 1.3 | 1.2 | IPF12606  | complemer unknown function, 5-pr                 | orf19.3288  | 12606 | IPF12606  | UNCLASSI molecular_function unknown                                                  |
| CA0694 | 1.4 |     | 1.0 | 0.9 | IPF12603  | complemer unknown function                       | orf19.3289  | 12603 | IPF12603  | No significant S.c. match                                                            |
| CA0695 | 0.8 | 1.3 | 1.0 | 1.2 | IPF12601  | 3697815..3 unknown function                      | orf19.3290  | 12601 | IPF12601  | No significant S.c. match                                                            |
| CA0696 | 0.9 | 1.1 | 0.9 | 1.0 | HMT1      | 3699135..3 hnRNP methyltransfer                  | orf19.3291  | 12599 | CaHMT1    | PROTEIN I transferase activity                                                       |
| CA0697 | 1.7 | 1.2 | 1.2 | 0.9 | VTC4      | complemer putative polyphosphate                 | orf19.3363  | 15753 | CaVTC4    | UNCLASSI molecular_function unknown                                                  |
| CA0700 | 1.5 | 0.9 | 0.9 | 0.8 | SHR3      | 3709534..3 endoplasmatic reticul                 | orf19.3366  | 10396 | CaSHR3    | PROTEIN I chaperone activity                                                         |
| CA0701 | 0.8 | 1.0 | 0.9 | 0.9 | IPF10397  | 3710871..3 unknown function                      |             | 10397 | IPF10397  | No significant S.c. match                                                            |
| CA0702 | 1.6 | 1.0 | 1.0 | 0.7 | IPF11812  | 3712258..3 unknown function                      | orf19.10430 | 11812 | IPF11812  | CELLULAF molecular_function unknown                                                  |
| CA0703 | 0.6 | 1.1 |     | 1.1 | IPF11807  | complemer unknown function                       | orf19.2914  | 11807 | IPF11807  | No significant S.c. match                                                            |
| CA0704 | 1.4 | 1.1 | 1.0 | 0.8 | IPF11806  | 3716310..3 similar to Saccharomy                 | orf19.2915  | 11806 | IPF11806  | PROTEIN I hydrolase activity                                                         |
| CA0705 | 1.5 | 1.0 | 0.9 | 0.8 | IPF11804  | 3718709..3 unknown function                      | orf19.10433 | 11804 | IPF11804  | No significant S.c. match                                                            |
| CA0706 | 3.9 | 2.8 | 2.9 | 1.2 | IPF7715   | 3720359..3 unknown function                      | orf19.8300  | 7715  | IPF7715   | CELL FATE                                                                            |
| CA0707 | 1.0 | 0.8 | 1.0 | 1.2 | IPF7711   | complemer related to Neurospora                  | orf19.8298  | 7711  | IPF7711   | No significant S.c. match                                                            |
| CA0709 | 0.7 | 1.0 | 1.2 | 1.1 | ZORRO2A   | complemer Reverse transcriptase,                 | orf19.3387  | 3477  | CaZorro2a | CELL CYCLE AND DNA PROCESSING                                                        |
| CA0711 | 1.1 | 1.1 | 1.0 | 1.2 | VMA5      | complemer H+-ATPase V1 domain                    | orf19.9712  | 13718 | CaVMA5    | PROTEIN I transporter activity                                                       |
| CA0712 | 1.4 | 1.0 | 1.0 | 0.7 | IPF13717  | 3739000..3 unknown function                      | orf19.2167  | 13717 | IPF13717  | UNCLASSI molecular_function unknown                                                  |
| CA0713 | 1.1 | 1.1 | 0.9 | 1.1 | IFJ2      | complemer Unknown function                       | orf19.2168  | 13715 | CaIFJ2    | UNCLASSI molecular_function unknown                                                  |
| CA0714 | 1.6 | 1.0 | 1.1 | 0.9 | IPF9480   | 3748514..3 unknown function                      | orf19.3394  | 9480  | IPF9480   | UNCLASSIFIED PROTEINS                                                                |
| CA0715 | 1.5 | 1.1 | 0.9 | 0.8 | DBP9      | complemer dead box helicase                      | orf19.3393  | 9477  | CaDBP9    | CLASSIFIC RNA binding,helicase activity                                              |
| CA0716 | 0.9 | 1.0 | 1.0 | 1.1 | DOG2      | complemer 2-deoxyglucose-6-pho:                  | orf19.3392  | 9474  | CaDOG2    | Phosphate hydrolase activity                                                         |
| CA0717 | 0.8 | 1.0 | 1.2 | 1.0 | IPF9785   | 3755079..3 unknown function                      | orf19.3453  | 9785  | IPF9785   | CELL FATE PROTEIN ACTIVITY REGULATION                                                |
| CA0718 | 0.9 | 1.0 | 0.8 | 1.1 | IPF9782   | complemer unknown function                       | orf19.3455  | 9782  | IPF9782   | TRANSCR transporter activity                                                         |
| CA0719 | 0.8 |     | 1.1 | 1.0 | IPF9779   | 3759945..3 serine/threonine protei               | orf19.3456  | 9779  | IPF9779   | CELL CYCLE AND DNA PROCESSING CELL FATE                                              |
| CA0720 | 1.0 | 0.9 | 0.9 | 0.9 | IPF17932  | complemer unknown function                       | orf19.3457  | 17933 | IPF17932  | UNCLASSI DNA binding                                                                 |
| CA0721 | 1.3 | 1.3 | 1.5 | 1.1 | IPF10429  | 3766761..3 unknown function                      | orf19.10405 | 10429 | IPF10429  | UNCLASSI molecular_function unknown                                                  |
| CA0722 | 1.0 | 0.9 | 0.9 | 0.9 | ERK1      | complemer mitogen-activated prot                 | orf19.10404 | 14791 | CaERK1    | REGULATI protein kinase activity,signal transducer activity                          |
| CA0723 | 0.7 | 0.9 | 1.1 | 1.0 | PRI2      | complemer DNA-directed DNA pol                   | orf19.2885  | 14788 | CaPRI2    | CELL CYC nucleotidyltransferase activity                                             |
| CA0724 | 2.3 | 2.1 | 2.8 | 0.8 | IPF13398  | complemer protein kinase (by hom                 | orf19.7708  | 13398 | IPF13398  | UNCLASSIFIED PROTEINS                                                                |
| CA0725 | 0.9 | 1.3 | 1.1 | 0.9 | IPF20063  | 3788443..3 unknown function                      | orf19.1749  | 20063 | IPF20063  | No significant S.c. match                                                            |
| CA0727 | 0.8 | 1.0 | 1.0 | 0.9 | IPF7347   | complemer unknown function                       | orf19.11214 | 7347  | IPF7347   | UNCLASSI molecular_function unknown                                                  |
| CA0728 | 1.0 | 1.1 | 0.9 | 1.0 | IPF7345   | 3795607..3 unknown function                      | orf19.11212 | 7345  | IPF7345   | UNCLASSI molecular_function unknown                                                  |
| CA0729 | 1.2 | 1.0 | 0.9 | 1.0 | IPF7338   | 3800930..3 unknown function                      | orf19.11210 | 7338  | IPF7338   | No significant S.c. match                                                            |
| CA0730 | 1.1 | 1.2 | 1.2 | 1.0 | IPF7334   | 3804299..3 unknown function                      | orf19.11208 | 7334  | IPF7334   | UNCLASSI molecular_function unknown                                                  |
| CA0731 | 1.5 | 1.4 | 1.6 | 1.4 | IPF7333   | complemer unknown function                       | orf19.11206 | 7333  | IPF7333   | CLASSIFIC DNA binding,transcription regulator activity                               |
| CA0732 | 1.0 | 1.0 | 0.9 | 0.9 | IPF9000   | complemer unknown function                       | orf19.4636  | 9000  | IPF9000   | No significant S.c. match                                                            |
| CA0733 | 1.1 | 1.0 | 1.1 | 0.9 | NIP1      | 3809260..3 translation initiation fa             | orf19.4635  | 8998  | CaNIP1    | PROTEIN (translation regulator activity                                              |
| CA0734 | 1.4 | 1.0 | 1.1 | 0.9 | IPF8996   | 3812285..3 unknown function                      | orf19.4634  | 8996  | IPF8996   | UNCLASSI molecular_function unknown                                                  |
| CA0735 | 0.5 | 1.0 | 1.2 | 0.9 | IPF8995   | 3813827..3 unknown function                      | orf19.4633  | 8995  | IPF8995   | CLASSIFIC oxidoreductase activity                                                    |
| CA0736 | 0.7 | 0.6 | 0.6 | 0.9 | RPL20B    | complemer ribosomal protein (by                  | orf19.4632  | 8994  | CaRPL20B  | PROTEIN (structural molecule activity                                                |
| CA0737 | 1.0 | 1.1 | 1.0 | 1.3 | SEC16.53F | 3817616..3 Multidomain vesicle coat protein, int |             | 19510 | CaSEC16   | C-compound and carbohydrate metabolism SUBCELLULAR LOCALISATION                      |
| CA0738 | 1.0 | 0.9 | 0.8 | 0.9 | SEC16.3F  | 3820133..3 Multidomain vesicle co                | orf19.11819 | 14620 | CaSEC16   | No significant S.c. match                                                            |
| CA0739 | 0.5 | 0.9 | 1.1 | 0.9 | IPF18885  | complemer similar to Saccharomy                  | orf19.11816 | 18885 | IPF18885  | CLASSIFIC hydrolase activity                                                         |
| CA0740 | 0.8 | 0.9 |     | 1.1 | IPF3262   | 3832587..3 unknown function, 3-prime end         |             | 3262  | IPF3262   | PROTEIN I chaperone activity                                                         |
| CA0741 | 0.9 | 1.4 | 1.3 | 1.1 | IPF3261   | 3833641..3 unknown function                      | orf19.3141  | 3261  | IPF3261   | SUBCELLL molecular_function unknown                                                  |
| CA0742 | 1.1 | 1.0 | 1.1 | 1.1 | IPF3259   | complemer unknown function                       | orf19.3142  | 3259  | IPF3259   | No significant S.c. match                                                            |
| CA0743 | 0.8 | 1.1 | 0.8 | 1.0 | RNA14.3E  | 3839805..3 component of pre-mRNA 3 -end pro      |             | 14917 | CaRNA14   | TRANSCR RNA binding                                                                  |

|        |     |     |     |     |            |                                             |             |       |            |                                                                                                 |
|--------|-----|-----|-----|-----|------------|---------------------------------------------|-------------|-------|------------|-------------------------------------------------------------------------------------------------|
| CA0744 | 1.6 | 1.0 | 1.0 | 1.0 | IPF14919   | 3841658..3unknown function                  | orf19.9105  | 14919 | IPF14919   | No significant S.c. match                                                                       |
| CA0745 | 1.0 | 1.0 | 0.8 | 1.1 | MTF1       | complemer RNA polymerase spec               | orf19.9104  | 14920 | CaMTF1     | CELL CYC transcription regulator activity                                                       |
| CA0746 | 1.5 | 1.2 | 1.0 | 0.8 | IPF14921   | 3845097..3unknown function                  | orf19.1527  | 14921 | IPF14921   | No significant S.c. match                                                                       |
| CA0747 | 1.2 | 1.2 | 1.3 | 1.0 | SNF2       | complemer component of SWI/SNI              | orf19.9102  | 15319 | CaSNF2     | C-coumpour transcription regulator activity                                                     |
| CA0748 | 0.6 | 0.9 | 1.2 | 1.0 | TFS1       | complemer cdc25-dependent nutri             | orf19.1974  | 6281  | CaTFS1     | CELL CYC enzyme regulator activity                                                              |
| CA0749 | 1.1 | 1.2 | 1.0 | 0.7 | HAP5       | complemer CCAAT-binding factor              | orf19.1973  | 6283  | CaHAP5     | TRANSCR transcription regulator activity                                                        |
| CA0750 | 1.1 | 1.1 | 1.1 | 1.1 | IPF6284    | complemer unknown function                  | orf19.1972  | 6284  | IPF6284    | UNCLASSI molecular_function unknown                                                             |
| CA0751 | 0.7 | 1.1 | 1.0 | 0.9 | IPF6286    | 3858216..3unknown function                  | orf19.1971  | 6286  | IPF6286    | TRANSCRIPTION                                                                                   |
| CA0752 | 1.4 | 1.1 | 1.0 | 0.9 | MNN22      | 3864361..3 Golgi alpha-1,2-mannco           | orf19.11284 | 10363 | CaMNN22    | CELL FATE                                                                                       |
| CA0753 | 1.3 | 1.0 | 1.0 | 0.8 | IPF10359   | complemer unknown function                  | orf19.11287 | 10359 | IPF10359   | UNCLASSI molecular_function unknown                                                             |
| CA0754 | 0.5 | 0.7 | 0.9 | 0.8 | IPF15880   | complemer unknown function                  | orf19.3486  | 15880 | IPF15880   | No significant S.c. match                                                                       |
| CA0755 | 1.0 | 1.0 | 1.0 | 1.1 | IPF14861   | 3877364..3unknown function                  | orf19.3487  | 14861 | IPF14861   | No significant S.c. match                                                                       |
| CA0756 | 1.0 | 1.0 | 1.2 | 0.8 | IPF14859   | 3878814..3acetyl-coenzyme-A dehy            | orf19.3488  | 14859 | IPF14859   | No significant S.c. match                                                                       |
| CA0757 | 1.6 | 1.3 | 1.5 | 1.1 | GAP7.3EO   | 3903803..3general amino-acid permease,      | 3-pr        | 11170 | CaGAP7.3e  | Amino acid metabolism CELLULAR TRANSPORT AND TRANSPORT MECHANISMS SUBCELLULAR LOCALISATION TRAN |
| CA0758 | 1.6 | 1.0 | 1.0 | 0.9 | PAP11      | complemer poly(A) polymerase by             | orf19.3197  | 19882 | CaPAP11    | TRANSCR nucleotidyltransferase activity                                                         |
| CA0759 | 1.5 | 1.2 | 1.0 | 1.0 | IPF11167   | 3907343..3unknown function                  | orf19.3198  | 11167 | IPF11167   | Lipid fatty-acid and isoprenoid metabolism                                                      |
| CA0760 | 0.9 | 1.1 | 1.0 | 1.0 | IPF11161.3 | 3913153..3unknown function, 3-pr            | orf19.3201  | 11161 | IPF11161.3 | CELL FATtranscription regulator activity                                                        |
| CA0761 | 1.3 | 0.9 | 1.1 | 0.9 | IPF8267    | complemer P-type ATPase                     | orf19.9146  | 8267  | IPF8267    | TRANSPO molecular_function unknown                                                              |
| CA0762 | 0.6 | 1.0 | 1.0 | 1.0 | TAF67      | 3920176..3TFIID subunit (by homi            | orf19.9147  | 15686 | CaTAF67    | TRANSCR transcription regulator activity                                                        |
| CA0763 | 0.1 | 0.7 | 0.5 | 1.1 | RPL11      | complemer 60S ribosomal protein             | orf19.2232  | 9044  | CaRPL11    | PROTEIN I structural molecule activity                                                          |
| CA0764 | 1.2 | 0.8 | 0.9 | 1.0 | PRE2       | complemer 20S proteasome subur              | orf19.2233  | 9042  | CaPRE2     | CELL CYC peptidase activity                                                                     |
| CA0765 | 1.5 | 1.0 | 1.0 | 0.8 | IPF9040.3e | complemer similar to Saccharomy             | orf19.9778  | 9040  | IPF9040.3e | TRANSCR DNA binding,transcription regulator activity                                            |
| CA0766 | 3.3 | 1.8 | 2.0 | 1.2 | IPF15335   | 3933411..3unknown function                  | orf19.12435 | 15335 | IPF15335   | No significant S.c. match                                                                       |
| CA0767 | 0.6 | 1.3 | 0.9 | 1.0 | KEM1.3     | 3936597..3multifunctional nucleas           | orf19.12434 | 13214 | CaKEM1.3   | Nucleotide DNA binding                                                                          |
| CA0768 | 0.9 | 0.8 | 1.1 | 0.9 | COX19      | complemer Protein required for cyto         | orf19.12432 | 13215 | CaCOX19    | No signific transporter activity                                                                |
| CA0769 | 1.1 | 1.1 | 1.1 | 2.7 | IPF10967   | complemer unknown function                  | orf19.2826  | 10967 | IPF10967   | No significant S.c. match                                                                       |
| CA0770 | 0.8 | 1.2 | 0.9 | 1.1 | IPF10963   | 3951799..3similar to Saccharomy             | orf19.10345 | 10963 | IPF10963   | SUBCELLL structural molecule activity                                                           |
| CA0771 | 1.2 | 1.1 | 0.9 | 0.8 | IPF11977   | complemer aspartic proteinase (by           | orf19.853   | 11977 | IPF11977   | PROTEIN FATE [folding modification destination] ""SUBCELLULAR LOCALISATION                      |
| CA0772 | 1.1 | 0.8 | 0.6 | 1.1 | UGA11.EX   | complemer 4-aminobutyrate aminotransferase, | 4           | 11976 | CaUGA11.   | Amino acid metabolism Nitrogen and sulphur metabolism                                           |
| CA0773 | 0.8 | 0.8 | 1.0 | 1.0 | UGA11.EX   | complemer 4-aminobutyrate aminc             | orf19.854   | 11975 | CaUGA11.   | Amino acid transferase activity                                                                 |
| CA0774 | 0.9 | 1.0 | 1.1 | 0.9 | IPF11974   | complemer unknown function                  | orf19.855   | 11974 | IPF11974   | No significant S.c. match                                                                       |
| CA0775 | 1.3 | 1.0 | 1.0 | 0.8 | IFK2       | complemer probable monooxygena:             | orf19.856   | 11973 | CaIFK2     | No significant S.c. match                                                                       |
| CA0777 | 1.3 | 1.3 | 1.1 | 1.1 | IPF11777   | 3968540..3unknown function                  | orf19.4778  | 11777 | IPF11777   | Amino acid metabolism TRANSCRIPTION SUBCELLULAR LOCALISATION UNCLASSIFIED PROTEINS              |
| CA0778 | 2.4 | 1.2 | 1.5 | 0.9 | IPF12884   | complemer unknown function                  | orf19.4779  | 12884 | IPF12884   | CELL RES molecular_function unknown                                                             |
| CA0779 | 1.5 | 0.9 | 1.0 | 0.8 | IPF20065   | complemer similar to Saccharomy             | orf19.3491  | 20065 | IPF20065   | CELL CYC DNA binding                                                                            |
| CA0780 | 1.4 | 0.9 | 1.0 | 0.9 | CIRT1a     | 3982286..3transposase                       | orf19.3492  | 3762  | CaCirt1a   | No significant S.c. match                                                                       |
| CA0781 | 1.9 | 1.7 | 1.3 | 1.0 | CAR1.3EO   | 3985861..3arginase, 3-prime end             | orf19.11416 | 16256 | CaCAR1.3e  | Amino acid metabolism Nitrogen and sulphur metabolism SUBCELLULAR LOCALISATION                  |
| CA0782 | 1.3 | 1.8 | 1.0 | 1.2 | IPF16253   | 3987286..3unknown function                  | orf19.11414 | 16253 | IPF16253   | No significant S.c. match                                                                       |
| CA0783 | 1.4 | 0.9 | 1.3 | 1.0 | ACR1       | 3990073..3 Succinate-fumarate tra           | orf19.3931  | 14601 | CaACR1     | C-coumpour transporter activity                                                                 |
| CA0784 | 0.9 | 0.9 | 1.0 | 1.1 | YUH1.3     | 3991413..3 Putative ubiquitin carb          | orf19.3930  | 14602 | CaYUH1.3   | PROTEIN FATE [folding modification destination] ""SUBCELLULAR LOCALISATION                      |
| CA0785 | 0.7 | 0.8 | 1.0 | 1.0 | IPF14603   | complemer unknown function                  | orf19.11411 | 14603 | IPF14603   | UNCLASSI molecular_function unknown                                                             |
| CA0786 | 1.5 | 1.0 | 1.1 | 1.0 | IPF7473    | 3996026..3unknown function                  | orf19.2446  | 7473  | IPF7473    | UNCLASSI molecular_function unknown                                                             |
| CA0787 | 0.6 | 1.2 | 0.9 | 1.0 | IPF7472    | complemer unknown function                  | orf19.2447  | 7472  | IPF7472    | UNCLASSI transferase activity                                                                   |
| CA0788 | 1.0 | 0.8 | 0.7 | 1.0 | IPF14107   | complemer unknown function                  | orf19.9985  | 14107 | IPF14107   | No significant S.c. match                                                                       |
| CA0789 | 0.8 | 1.1 | 1.0 | 1.1 | ESP1       | complemer Required for sister chr           | orf19.3356  | 14196 | CaESP1     | CELL CYC peptidase activity                                                                     |
| CA0790 | 0.6 | 0.8 | 0.9 | 1.0 | IPF14193   | complemer unknown function                  | orf19.3357  | 14193 | IPF14193   | UNCLASSI molecular_function unknown                                                             |
| CA0791 | 0.4 | 0.2 | 0.3 | 0.7 | LSC1       | complemer succinate-CoA ligase /            | orf19.3358  | 14191 | CaLSC1     | C-coumpour ligase activity                                                                      |
| CA0792 | 1.0 | 1.0 | 1.0 | 1.3 | DIT2       | 4015047..4 putative cytochrome P            | orf19.554   | 20066 | CaDIT2     | CELL RESCUE DEFENSE AND VIRULENCE ""CELL FATE CONTROL OF CELLULAR ORGANIZATION                  |
| CA0793 | 1.0 | 1.0 | 1.0 | 1.1 | IPF16273   | 4016707..4 similar to Saccharomy            | orf19.553   | 16273 | IPF16273   | CELL RES transporter activity                                                                   |
| CA0794 | 0.9 | 1.1 | 0.9 | 1.0 | IPF15639   | 4018478..4 unknown function                 | orf19.552   | 15639 | IPF15639   | TRANSPO molecular_function unknown                                                              |
| CA0795 | 0.9 | 0.7 | 1.0 | 0.9 | IPF15641   | complemer unknown function                  | orf19.8186  | 15641 | IPF15641   | TRANSCRIPTION SUBCELLULAR LOCALISATION                                                          |
| CA0796 | 1.0 | 2.5 | 1.0 | 1.0 | ALR1       | 4025800..4 divalent cation transpo          | orf19.9175  | 13562 | CaALR1     | CELLULAF transporter activity                                                                   |
| CA0797 | 1.0 | 0.9 | 1.0 | 1.2 | IPF13564   | 4029562..4 putative arylsulfatase (         | orf19.1608  | 13564 | IPF13564   | No significant S.c. match                                                                       |
| CA0798 | 0.9 | 1.2 | 0.9 | 1.0 | IPF13565   | complemer unknown function                  | orf19.9177  | 13565 | IPF13565   | UNCLASSI molecular_function unknown                                                             |
| CA0799 | 0.8 | 1.0 | 1.0 | 1.0 | IPF14825   | complemer unknown function                  | orf19.9178  | 13567 | IPF14825   | No significant S.c. match                                                                       |
| CA0800 | 1.6 | 1.1 | 1.2 | 1.1 | IPF14064   | 4037327..4 similar to Saccharomy            | orf19.3494  | 14064 | IPF14064   | SUBCELLL protein binding                                                                        |
| CA0801 | 0.8 | 1.2 | 1.0 | 1.0 | CHC1       | complemer clathrin heavy chain (b           | orf19.3496  | 14063 | CaCHC1     | PROTEIN I structural molecule activity                                                          |
| CA0802 | 1.4 | 1.2 | 1.3 | 1.1 | IPF14060   | complemer unknown function                  | orf19.3498  | 14060 | IPF14060   | UNCLASSIFIED PROTEINS                                                                           |
| CA0803 | 0.7 | 1.0 | 0.9 | 0.9 | IFL4       | 4047742..4 unknown function                 | orf19.3512  | 12574 | CaIFL4     | CELL RESCUE DEFENSE AND VIRULENCE ""SUBCELLULAR LOCALISATION                                    |
| CA0804 | 1.0 | 0.9 | 1.0 | 1.0 | BNA1       | 4049307..4 3-hydroxyanthranilic ac          | orf19.3515  | 12570 | CaBNA1     | Amino acid oxidoreductase activity                                                              |
| CA0805 | 0.7 | 1.0 | 1.0 | 1.1 | IPF12568   | complemer unknown function                  | orf19.3516  | 12568 | IPF12568   | No significant S.c. match                                                                       |
| CA0806 | 1.1 | 1.1 | 0.9 | 1.0 | IPF12567   | 4050879..4 unknown function                 | orf19.3517  | 12567 | IPF12567   | UNCLASSI molecular_function unknown                                                             |
| CA0807 | 1.1 | 0.7 | 1.0 | 1.2 | IPF12564   | 4053164..4 ADP/ATP carrier prote            | orf19.3518  | 12564 | IPF12564   | CELLULAF transporter activity                                                                   |
| CA0808 | 1.3 | 1.1 | 1.1 | 1.0 | SUA71      | 4054757..4TFIIB subunit (transcri           | orf19.3519  | 12563 | CaSUA71    | TRANSCRIPTION SUBCELLULAR LOCALISATION                                                          |
| CA0810 | 1.4 | 1.0 | 0.9 | 0.8 | RRN3       | 4062688..4 RNA polymerase I spe             | orf19.1923  | 19708 | CaRRN3     | TRANSCR transcription regulator activity                                                        |
| CA0811 | 0.8 | 0.8 | 1.1 | 1.1 | IPF17625   | complemer putative cell wall protei         | orf19.1920  | 17625 | IPF17625   | CELL RESCUE DEFENSE AND VIRULENCE ""SUBCELLULAR LOCALISATION                                    |
| CA0812 | 0.8 | 0.9 | 0.9 | 0.9 | IPF3348    | complemer unknown function                  | orf19.1917  | 16243 | IPF3348    | UNCLASSIFIED PROTEINS                                                                           |
| CA0813 | 1.7 | 1.1 | 1.1 | 0.8 | MPP10      | complemer component of the U3 s             | orf19.1915  | 16234 | CaMPP10    | TRANSCR molecular_function unknown                                                              |
| CA0814 | 0.9 | 1.0 | 0.9 | 0.9 | IPF16233   | complemer unknown function                  | orf19.1914  | 16233 | IPF16233   | No significant S.c. match                                                                       |
| CA0815 | 0.9 | 0.8 | 0.6 | 1.1 | IPF16231   | 4069461..4 unknown function                 | orf19.1913  | 16231 | IPF16231   | No significant S.c. match                                                                       |
| CA0817 | 3.0 | 2.8 | 1.6 | 1.2 | IPF6339    | 4087533..4 unknown function                 | orf19.10239 | 6399  | IPF6339    | No significant S.c. match                                                                       |

|        |      |     |      |     |            |                                                 |                  |                                                                                                       |
|--------|------|-----|------|-----|------------|-------------------------------------------------|------------------|-------------------------------------------------------------------------------------------------------|
| CA0819 | 1.3  | 1.1 | 1.0  | 0.8 | VPS1       | complemer member of the dynami orf19.1949       | 19610 CaVPS1     | PROTEIN Hydrolase activity                                                                            |
| CA0820 | 0.6  | 1.1 | 1.1  | 0.9 | IPF12138   | complemer unknown function orf19.1950           | 18864 IPF12138   | UNCLASSI hydrolase activity                                                                           |
| CA0821 | 1.2  | 1.1 | 1.0  | 0.8 | IPF16795   | 4104298..4 glycerate/formate-dehy orf19.2989    | 16795 IPF16795   | C-compour oxidoreductase activity                                                                     |
| CA0822 | 0.6  | 1.0 | 0.9  | 1.2 | EXG1       | complemer glucan 1,3-beta-glucos orf19.2990     | 14073 CaEXG1     | C-compour hydrolase activity                                                                          |
| CA0823 | 1.5  | 0.9 | 1.1  | 0.9 | IPF11987.5 | 4112204..4 unknown function, 3-pr orf19.692     | 11987 IPF11987.5 | No significant S.c. match                                                                             |
| CA0824 | 1.5  | 1.3 | 1.1  | 0.9 | GPD2       | 4114960..4 Glycerol 3-phosphate corf19.691      | 11982 CaGPD2     | C-compound and carbohydrate metabolism ""CELL RESCUE DEFENSE AND VIRULENCE ""REGULATION OF/INTERACTIO |
| CA0825 | 0.9  | 0.9 | 1.1  | 0.9 | PLB2       | complemer phospholipase B orf19.8309            | 11981 CaPLB2     | Lipid fatty-acid and isoprenoid metabolism ""SUBCELLULAR LOCALISATION Other virulence attributes      |
| CA0826 | 1.0  | 0.9 | 1.0  | 0.9 | IPF19885   | 4118749..4 unknown function orf19.8308          | 19885 IPF19885   | No significant S.c. match                                                                             |
| CA0827 | 1.0  | 1.0 |      | 1.1 | IPF18859   | 4122110..4 unknown function orf19.7884          | 18859 IPF18859   | UNCLASSI molecular_function unknown                                                                   |
| CA0828 | 0.8  | 1.2 | 0.7  | 1.2 | IPF17186   | 4124295..4 unknown function orf19.7882          | 17186 IPF17186   | UNCLASSI molecular_function unknown                                                                   |
| CA0829 | 0.7  |     |      | 0.8 | SLC1       | 4125941..4 fatty acyltransferase (b orf19.250   | 19886 CaSLC1     | Lipid fatty-z-transferase activity                                                                    |
| CA0830 | 1.4  | 1.1 | 0.8  | 0.9 | APL5       | complemer AP-3 complex subunit, orf19.7879      | 14699 CaAPL5     | CELLULAF molecular_function unknown                                                                   |
| CA0831 | 0.8  | 0.9 | 1.2  | 1.2 | IPF10493.5 | 4130615..4 unknown function, 5-pr orf19.7878    | 14701 IPF10493.5 | No significant S.c. match                                                                             |
| CA0832 | 1.0  | 1.1 |      | 1.2 | IPF14225   | complemer unknown function orf19.9244           | 14225 IPF14225   | UNCLASSI molecular_function unknown                                                                   |
| CA0833 | 0.9  | 1.0 | 1.0  | 1.1 | IPF12501   | 4136657..4 unknown function orf19.9245          | 12501 IPF12501   | UNCLASSI molecular_function unknown                                                                   |
| CA0834 | 1.0  | 1.2 | 0.8  | 1.2 | IPF12498.5 | complemer unknown function, 3-pr orf19.1677     | 12499 IPF12498.5 | No significant S.c. match                                                                             |
| CA0835 | 1.5  | 1.0 | 0.8  | 0.8 | IPF12498.5 | complemer unknown function, internal fragment   | 12498 IPF12498.5 | No significant S.c. match                                                                             |
| CA0836 | 0.9  | 1.2 | 0.9  | 1.0 | IPF12495.5 | 4140843..4 unknown function, 5-pr orf19.9248    | 12495 IPF12495.5 | No significant S.c. match                                                                             |
| CA0837 | 1.0  | 0.9 | 0.9  | 0.9 | IPF12495.5 | 4141422..4 unknown function, 3-prime end        | 12494 IPF12495.5 | No significant S.c. match                                                                             |
| CA0838 | 1.2  | 1.2 |      | 1.3 | TFP1       | complemer vacuolar ATPase subu orf19.9249       | 12493 CaTFP1     | PROTEIN IDNA binding                                                                                  |
| CA0839 | 1.1  | 1.0 | 1.0  | 1.1 | IPF12492   | complemer unknown function                      | 12492 IPF12492   | PROTEIN FATE [folding modification destination] ""SUBCELLULAR LOCALISATION                            |
| CA0840 | 0.5  | 1.0 | 0.7  | 1.1 | IFD1       | 4146777..4 Putative aryl-alcohol de orf19.8650  | 18856 CaIFD1     | C-compound and carbohydrate metabolism ENERGY                                                         |
| CA0841 | 1.0  | 1.0 | 1.1  | 1.0 | IPF15638   | complemer unknown function orf19.8652           | 15638 IPF15638   | No significant S.c. match                                                                             |
| CA0842 | 0.4  | 1.1 | 1.0  | 0.9 | IPF15633   | complemer similar to Saccharomy orf19.1053      | 15633 IPF15633   | CELLULAF molecular_function unknown                                                                   |
| CA0843 | 1.2  | 1.1 | 1.2  | 0.9 | IPF18853   | complemer unknown function orf19.8656           | 18853 IPF18853   | UNCLASSI molecular_function unknown                                                                   |
| CA0844 | 0.7  | 0.5 | 0.8  | 1.2 | CDC3       | complemer Cell division control pr orf19.8657   | 16098 CaCDC3     | CELL CYC structural molecule activity                                                                 |
| CA0845 | 0.7  | 1.1 | 1.0  | 1.0 | IPF16314   | complemer unknown function orf19.7896           | 16314 IPF16314   | No significant S.c. match                                                                             |
| CA0846 | 1.0  | 0.8 |      | 1.1 | SMC3       | complemer required for structural r orf19.7895  | 12682 CaSMC3     | CELL CYC hydrolase activity                                                                           |
| CA0848 | 10.1 | 5.1 | 47.9 | 4.0 | ACS1       | 4172674..4 acetyl-coenzyme-A syr orf19.1743     | 15005 CaACS1     | C-compour ligase activity                                                                             |
| CA0849 | 1.2  | 1.2 | 1.3  | 1.0 | HEM4       | complemer uroporphyrinogen III sy orf19.9311    | 15006 CaHEM4     | Metabolism lyase activity                                                                             |
| CA0850 | 1.1  | 1.0 | 0.9  | 0.9 | IPF16671   | 4177044..4 unknown function orf19.9312          | 16671 IPF16671   | No significant S.c. match                                                                             |
| CA0851 | 1.6  | 1.0 | 1.0  | 0.8 | IPF16670   | 4177799..4 unknown function orf19.9313          | 16670 IPF16670   | UNCLASSI molecular_function unknown                                                                   |
| CA0852 | 1.3  | 0.9 | 1.1  | 0.8 | KIP2       | 4179505..4 Kinesin-related protein orf19.9315   | 10752 CaKIP2     | CELL CYC motor activity                                                                               |
| CA0853 | 0.6  | 1.3 | 0.9  | 1.2 | IPF19640   | 4182073..4 unknown function orf19.9316          | 19639 IPF19640   | No significant S.c. match                                                                             |
| CA0854 | 0.9  | 0.8 | 1.0  | 0.9 | IPF8854    | complemer similar to Saccharomy orf19.4900      | 8854 IPF8854     | C-compour transferase activity                                                                        |
| CA0855 | 0.8  | 1.0 | 1.0  | 1.1 | AMYG1      | complemer glucoamylase orf19.4899               | 8948 CaAMYG1     | C-compound and carbohydrate metabolism ENERGY SUBCELLULAR LOCALISATION                                |
| CA0856 | 0.7  | 1.0 | 0.9  | 1.1 | IFL1       | 4203810..4 unknown function orf19.11943         | 14489 CaIFL1     | CELL RESCUE DEFENSE AND VIRULENCE ""CELL FATE                                                         |
| CA0857 | 1.0  | 0.8 | 1.0  | 1.0 | SEN15      | 4205571..4 tRNA splicing endonuc orf19.4464     | 14490 CaSEN15    | No significant S.c. match                                                                             |
| CA0858 | 1.1  | 0.9 | 0.9  | 0.9 | IPF14493   | complemer unknown function orf19.4465           | 14493 IPF14493   | No significant S.c. match                                                                             |
| CA0859 | 1.1  | 1.2 | 1.0  | 1.0 | IPF14495.5 | complemer similar to Saccharomy orf19.11946     | 14495 IPF14495.5 | PROTEIN t transferase activity                                                                        |
| CA0860 | 3.2  | 1.6 | 2.0  | 0.9 | IPF17272   | 4213479..4 unknown function orf19.3522          | 17272 IPF17272   | No significant S.c. match                                                                             |
| CA0861 | 1.8  | 1.2 | 1.1  | 0.8 | CRK1.3F    | complemer Protein kinase, 3-prime orf19.3523    | 17271 CaCRK1.3I  | No significant S.c. match                                                                             |
| CA0862 | 1.4  | 1.1 | 1.1  | 0.8 | CRK1.5F    | complemer Protein kinase, 5-prime orf19.3524    | 17267 CaCRK1.5I  | CELL CYC protein kinase activity                                                                      |
| CA0863 | 0.8  | 2.0 | 1.3  | 1.1 | ITR2       | complemer Myo-inositol transporte orf19.3526    | 4456 CaITR2      | C-compour transporter activity                                                                        |
| CA0864 | 1.9  | 1.5 | 2.1  | 1.1 | CYT1       | complemer cytochrome-c1 (by hon orf19.3527      | 4458 CaCYT1      | ENERGY t transporter activity                                                                         |
| CA0865 | 0.9  | 1.1 | 1.1  | 1.1 | IFM2       | 4224960..4 Glycerate-formate-deh orf19.3584     | 14777 CaIFM2     | C-compound and carbohydrate metabolism                                                                |
| CA0866 | 1.4  | 1.1 | 1.0  | 0.9 | IPF14775   | complemer unknown function orf19.3585           | 14775 IPF14775   | UNCLASSI molecular_function unknown                                                                   |
| CA0867 | 1.5  | 1.4 | 0.9  | 1.3 | IPF14773.5 | complemer unknown function, exo orf19.3586      | 14774 IPF14773.5 | No significant S.c. match                                                                             |
| CA0869 | 1.0  | 1.3 | 1.0  | 1.1 | IPF14772   | 4228888..4 unknown function orf19.3589          | 14772 IPF14772   | CELL CYC DNA binding                                                                                  |
| CA0870 | 0.7  | 0.7 | 0.8  | 1.1 | IPP1       | 4230096..4 inorganic pyrophospha orf19.3590     | 19604 CaIPP1     | Phosphate hydrolase activity                                                                          |
| CA0871 | 1.0  | 0.7 | 0.9  | 1.1 | APE3       | 4231613..4 aminopeptidase (by ho orf19.3591     | 16625 CaAPE3     | PROTEIN l peptidase activity                                                                          |
| CA0872 | 1.2  | 1.1 | 1.0  | 0.9 | IPF13100   | complemer unknown function orf19.3592           | 13100 IPF13100   | PROTEIN l chaperone activity                                                                          |
| CA0873 | 1.7  | 1.0 | 0.9  | 1.4 | BUL1       | 4237825..4 Ubiquitin ligase binding orf19.12099 | 9241 CaBUL1      | PROTEIN l protein binding                                                                             |
| CA0874 | 1.4  | 1.2 | 1.0  | 1.0 | CPA1       | 4241368..4 Arginine-specific carba orf19.12100  | 11885 CaCPA1     | Amino acid ligase activity                                                                            |
| CA0875 | 0.2  | 0.2 | 0.3  | 0.8 | ERG251     | 4244711..4 C-4 sterol methyl oxide orf19.12101  | 8993 CaERG251    | Lipid fatty-acid and isoprenoid metabolism ""SUBCELLULAR LOCALISATION                                 |
| CA0876 | 0.5  | 1.1 | 1.0  | 1.0 | VMA6       | 4247506..4 H+-ATPase V0 domair orf19.7996       | 19887 CaVMA6     | PROTEIN l transporter activity                                                                        |
| CA0877 | 1.9  | 1.2 | 1.1  | 0.9 | CNH1.5F    | 4249699..4 Na+/H+ antiporter, 5-p orf19.8000    | 10959 CaCNH1.5   | REGULATI transporter activity                                                                         |
| CA0878 | 2.1  | 1.2 | 1.0  | 1.3 | CNH1.3F    | 4251525..4 Na+/H+ antiporter, 3-p orf19.8001    | 18845 CaCNH1.3   | REGULATION OF/INTERACTION WITH CELLULAR ENVIRONMENT TRANSPORT FACILITATION                            |
| CA0879 | 0.9  | 0.8 | 0.9  | 0.9 | IPF19542.5 | 4252167..4 unknown function, 5-pr orf19.8003    | 19542 IPF19542.5 | Amino acid metabolism TRANSCRIPTION SUBCELLULAR LOCALISATION                                          |
| CA0880 | 0.9  | 1.0 | 1.1  | 0.9 | IPF19542.5 | 4253029..4 unknown function, 3-pr orf19.372     | 16966 IPF19542.5 | UNCLASSI molecular_function unknown                                                                   |
| CA0881 | 1.2  | 1.0 | 1.2  | 1.0 | IPF16965   | complemer unknown function orf19.8006           | 16965 IPF16965   | CLASSIFIC molecular_function unknown                                                                  |
| CA0882 | 1.0  | 1.3 | 1.1  | 1.0 | PHR3       | 4257794..4 surfac glycoprotein (b orf19.8010    | 12107 CaPHR3     | CLASSIFIC molecular_function unknown                                                                  |
| CA0883 | 0.2  | 0.1 | 0.1  | 0.1 | SUN41      | 4266853..4 Putative cell wall beta- orf19.3642  | 14577 CaSUN41    | CELL CYC molecular_function unknown                                                                   |
| CA0884 | 0.6  | 0.8 | 0.9  | 0.9 | CAN5       | complemer amino acid permease (orf19.3641       | 19550 CaCAN5     | Amino acid metabolism CELLULAR TRANSPORT AND TRANSPORT MECHANISMS SUBCELLULAR LOCALISATION TRAN       |
| CA0885 | 0.8  | 0.9 |      | 1.2 | IPF12381   | 4273724..4 unknown function orf19.1389          | 12381 IPF12381   | TRANSCR RNA binding                                                                                   |
| CA0886 | 0.8  | 0.9 | 1.1  | 0.9 | IPF12382   | 4276766..4 unknown function orf19.1388          | 12382 IPF12382   | SUBCELLI molecular_function unknown                                                                   |
| CA0887 | 0.8  | 0.8 | 0.9  | 1.1 | IPF12383   | complemer unknown function orf19.1387           | 12383 IPF12383   | UNCLASSI molecular_function unknown                                                                   |
| CA0888 | 0.8  | 1.0 | 1.0  | 1.0 | BET1       | 4278785..4 involved in ER-Golgi tr orf19.1386   | 12385 CaBET1     | CELLULAF transporter activity                                                                         |
| CA0889 | 1.5  | 1.0 |      | 0.8 | IPF11767   | 4284439..4 mitochondrial carrier pr orf19.4733  | 11767 IPF11767   | CELLULAR TRANSPORT AND TRANSPORT MECHANISMS SUBCELLULAR LOCALISATION TRANSPORT FACILITATION           |
| CA0890 | 1.2  | 0.8 | 1.0  | 0.9 | IPF11766   | 4285793..4 unknown function orf19.4734          | 11766 IPF11766   | PROTEIN FATE [folding modification destination]                                                       |
| CA0891 | 0.8  | 0.7 | 1.3  | 0.9 | IPF11764   | 4287107..4 unknown function orf19.4735          | 11764 IPF11764   | UNCLASSI molecular_function unknown                                                                   |

|        |     |     |     |     |            |                                                           |                  |                                                                                                                     |
|--------|-----|-----|-----|-----|------------|-----------------------------------------------------------|------------------|---------------------------------------------------------------------------------------------------------------------|
| CA0892 | 1.7 | 1.7 | 1.1 | 1.0 | PHO8.5     | 4288986..4 repressible alkaline ph orf19.4736             | 19888 CaPHO8.5   | Phosphate hydrolase activity                                                                                        |
| CA0893 | 1.0 | 1.3 | 1.1 | 0.9 | IPF13517   | 4294111..4 unknown function orf19.5752                    | 13517 IPF13517   | UNCLASSI molecular_function unknown                                                                                 |
| CA0894 | 1.3 | 1.8 | 0.9 | 1.3 | ORM1       | 4296932..4 unknown function orf19.5751                    | 13514 CaORM1     | UNCLASSI molecular_function unknown                                                                                 |
| CA0895 | 1.1 | 1.1 | 1.1 | 1.3 | SHM2       | 4299044..4 Serine hydroxymethyltr orf19.5750              | 15120 CaSHM2     | Nucleotide transferase activity                                                                                     |
| CA0896 | 0.5 | 0.9 | 0.7 | 0.8 | SBA1       | 4300930..4 Hsp90 (Ninety) Associ orf19.5749               | 15122 CaSBA1     | PROTEIN I chaperone activity                                                                                        |
| CA0897 | 1.0 | 0.9 |     | 1.1 | IPF4902    | 4304092..4 unknown function orf19.8043                    | 4902 IPF4902     | No significant S.c. match                                                                                           |
| CA0898 | 1.1 | 0.6 |     | 0.9 | SSH1.3     | complemer involved in co-translati orf19.412              | 4903 CaSSH1.3    | PROTEIN I transporter activity                                                                                      |
| CA0899 | 1.5 | 1.0 | 1.0 | 0.8 | IPF4905    | complemer unknown function orf19.411                      | 4905 IPF4905     | No significant S.c. match                                                                                           |
| CA0900 | 0.8 | 1.2 | 0.9 | 0.9 | IPF12031   | 4316540..4 unknown function orf19.3411                    | 12031 IPF12031   | Metabolism molecular_function unknown                                                                               |
| CA0901 | 1.2 | 1.6 | 1.0 | 0.9 | IPF12033   | 4317758..4 unknown function orf19.3412                    | 12033 IPF12033   | UNCLASSI hydrolase activity                                                                                         |
| CA0902 | 0.9 | 1.1 | 1.0 | 0.9 | IPF12034   | complemer unknown function orf19.3413                     | 12034 IPF12034   | No significant S.c. match                                                                                           |
| CA0903 | 1.9 | 1.5 | 1.5 | 1.2 | IPF4401    | 4323951..4 putative succinate deh orf19.1480              | 4401 IPF4401     | ENERGY molecular_function unknown                                                                                   |
| CA0904 | 1.1 | 1.2 | 1.1 | 1.2 | IPF4403    | complemer unknown function orf19.1481                     | 4403 IPF4403     | No significant S.c. match                                                                                           |
| CA0905 | 1.4 | 1.0 | 1.1 | 1.0 | IPF4405    | 4328219..4 unknown function orf19.1482                    | 4405 IPF4405     | No significant S.c. match                                                                                           |
| CA0906 | 0.8 | 0.9 | 0.9 | 1.0 | IPF4406    | complemer unknown function orf19.1483                     | 4406 IPF4406     | UNCLASSI molecular_function unknown                                                                                 |
| CA0907 | 0.9 | 1.0 | 1.1 | 0.9 | IPF19889   | 4329345..4 Unknown Function orf19.1484                    | 19889 IPF19889   | No significant S.c. match                                                                                           |
| CA0908 | 0.8 | 1.0 | 1.1 | 0.9 | MRPL31     | complemer Mitochondrial ribosom orf19.1485                | 6016 CaMRPL31    | PROTEIN I structural molecule activity                                                                              |
| CA0910 | 0.7 | 0.9 | 0.9 | 1.0 | MRPL16     | 4342281..4 ribosomal protein orf19.9569                   | 4102 CaMRPL16    | PROTEIN I structural molecule activity                                                                              |
| CA0911 | 1.0 | 1.1 |     | 1.2 | IPF14814   | complemer unknown function orf19.9568                     | 14814 IPF14814   | PROTEIN I molecular_function unknown                                                                                |
| CA0912 | 1.2 | 1.1 | 1.1 | 0.8 | RPA49      | 4344552..4 DNA-directed RNA pol orf19.9567                | 14813 CaRPA49    | TRANSCR nucleotidyltransferase activity                                                                             |
| CA0913 | 0.4 | 0.8 | 1.0 | 1.2 | IPF14810   | complemer unknown function orf19.9566                     | 14810 IPF14810   | Lipid fatty-ε molecular_function unknown                                                                            |
| CA0914 | 1.2 | 1.5 | 1.5 | 1.2 | SRA1       | complemer cAMP dependent prote orf19.9565                 | 19590 CaSRA1     | C-compou enzyme regulator activity                                                                                  |
| CA0915 | 0.7 | 0.6 | 0.4 | 1.1 | KAR2       | 4350772..4 dnaK-type molecular c orf19.9564               | 15827 CaKAR2     | CELL CYC chaperone activity                                                                                         |
| CA0916 | 1.5 | 0.9 | 1.3 | 1.1 | LYS2       | complemer L-aminoadipate-semial orf19.2970                | 19710 CaLYS2     | Amino acid oxidoreductase activity                                                                                  |
| CA0917 | 1.0 | 1.1 | 1.0 | 0.9 | RAD16      | complemer nucleotide excision rep orf19.2969              | 15502 CaRAD16    | CELL CYC hydrolase activity                                                                                         |
| CA0918 | 1.4 | 1.2 | 0.8 | 0.8 | IPF17881   | complemer cyclin (by homology) orf19.1041                 | 17881 IPF17881   | TRANSCR protein kinase activity,enzyme regulator activity                                                           |
| CA0919 | 1.8 | 1.6 | 2.3 | 0.8 | POR1       | complemer mitochondrial outer me orf19.1042               | 12994 CaPOR1     | CELLULAF transporter activity                                                                                       |
| CA0920 | 0.1 | 0.9 | 1.0 | 1.0 | IPF18833   | 4367748..4 unknown function orf19.1043                    | 18833 IPF18833   | No significant S.c. match                                                                                           |
| CA0921 | 1.1 | 0.8 | 1.1 | 0.9 | IPF12992   | 4368845..4 unknown function orf19.1043                    | 12992 IPF12992   | UNCLASSI molecular_function unknown                                                                                 |
| CA0922 | 1.5 | 0.9 | 1.1 | 0.8 | IPF12991   | complemer unknown function orf19.1045                     | 12991 IPF12991   | TRANSCR RNA binding                                                                                                 |
| CA0923 | 0.9 | 0.9 | 1.1 | 0.9 | IPF12987   | 4370933..4 unknown function orf19.1047                    | 12987 IPF12987   | UNCLASSI molecular_function unknown                                                                                 |
| CA0924 | 0.4 | 1.0 | 0.9 | 1.2 | IFD5       | 4374190..4 Putative aryl-alcohol de orf19.1048            | 17049 CaIFD5     | C-compound and carbohydrate metabolism ENERGY                                                                       |
| CA0925 | 0.3 | 0.8 | 1.0 | 1.1 | IPF17050   | complemer unknown function orf19.1049                     | 17050 IPF17050   | ENERGY                                                                                                              |
| CA0926 | 1.1 | 1.0 | 1.0 | 1.1 | IPF11335   | 4381652..4 Member of the phosph orf19.3663                | 11335 IPF11335   | Phosphate transporter activity                                                                                      |
| CA0927 | 1.0 | 1.2 | 1.0 | 1.2 | IPF11332   | 4385006..4 unknown function orf19.3661                    | 11332 IPF11332   | PROTEIN I peptidase activity                                                                                        |
| CA0928 | 0.9 | 1.0 | 0.9 | 1.1 | IPF19891   | 4388461..4 unknown function orf19.8192                    | 19891 IPF19891   | No significant S.c. match                                                                                           |
| CA0929 | 1.3 | 0.9 |     | 1.3 | GUT1       | complemer Glycerol kinase (by ho orf19.558                | 3751 CaGUT1      | C-compou transferase activity                                                                                       |
| CA0930 | 1.3 | 1.1 | 1.0 | 0.9 | ZORRO1A    | complemer Putative reverse trans orf19.559                | 3750 CaZorro1a   | CELL CYCLE AND DNA PROCESSING CELLULAR TRANSPORT AND TRANSPORT MECHANISMS SUBCELLULAR LOCALISATION                  |
| CA0931 | 1.1 | 1.2 | 1.1 | 1.1 | IPF3748    | complemer unknown function orf19.562                      | 3748 IPF3748     | CELL CYCLE AND DNA PROCESSING CONTROL OF CELLULAR ORGANIZATION SUBCELLULAR LOCALISATION                             |
| CA0932 | 1.0 | 0.9 | 0.8 | 0.9 | EPT1       | complemer alcohol phosphatidyl tr orf19.3695              | 8065 CaEPT1      | Lipid fatty-ε transferase activity                                                                                  |
| CA0933 | 1.0 | 1.1 | 0.9 | 1.1 | ATM1       | complemer ATP-binding cassette t orf19.8678               | 14199 CaATM1     | CELLULAF transporter activity,hydrolase activity                                                                    |
| CA0934 | 1.0 | 1.2 | 1.0 | 1.0 | IPF14203.3 | complemer similarity to several tra orf19.1078            | 14202 IPF14203.3 | Amino acid metabolism Nitrogen and sulphur metabolism                                                               |
| CA0935 | 0.7 | 1.0 | 0.9 | 1.0 | IPF14203.5 | complemer similarity to several tra orf19.1079            | 14203 IPF14203.5 | Amino acid transferase activity                                                                                     |
| CA0936 | 0.8 | 1.1 | 1.1 | 1.0 | IPF16291   | 4422849..4 unknown function orf19.1080                    | 16291 IPF16291   | No significant S.c. match                                                                                           |
| CA0937 | 1.3 | 1.1 | 1.1 | 0.8 | IPF19892   | 4425035..4 unknown function orf19.8683                    | 19892 IPF19892   | No significant S.c. match                                                                                           |
| CA0938 | 0.9 | 1.0 | 1.2 | 1.0 | COX12      | 4425874..4 cytochrome-c oxidase, subunit VIB ( orf19.3704 | 16288 CaCOX12    | ENERGY " oxidoreductase activity                                                                                    |
| CA0939 | 0.8 | 1.0 | 1.0 | 0.9 | DBP6       | complemer RNA helicase required orf19.3704                | 8614 CaDBP6      | TRANSCR RNA binding,helicase activity                                                                               |
| CA0940 | 1.0 | 0.9 | 0.9 | 1.1 | IPF8616    | 4429583..4 similar to Saccharomyces cerevisiae orf19.3707 | 8616 IPF8616     | PROTEIN I structural molecule activity                                                                              |
| CA0941 | 1.2 | 1.0 | 1.0 | 1.1 | IPF8617    | complemer unknown function orf19.3705                     | 8617 IPF8617     | UNCLASSI protein phosphatase activity                                                                               |
| CA0942 | 0.6 | 1.0 | 0.9 | 1.0 | IPF8619    | 4432166..4 unknown function orf19.3706                    | 8619 IPF8619     | PROTEIN FATE [folding modification destination]                                                                     |
| CA0943 | 1.4 | 1.6 |     | 1.1 | YHB1       | complemer flavohemoglobin (by ho orf19.3707               | 8621 CaYHB1      | CELL RES molecular_function unknown                                                                                 |
| CA0944 | 0.9 | 1.8 |     | 1.3 | IPF10280   | complemer unknown function orf19.8852                     | 10280 IPF10280   | No significant S.c. match                                                                                           |
| CA0945 | 1.6 | 1.2 | 0.9 | 0.9 | IPF10278   | 4442823..4 DNA-J - like protein (by orf19.8853            | 10278 IPF10278   | PROTEIN FATE [folding modification destination]                                                                     |
| CA0946 | 1.0 | 0.9 | 1.2 | 1.0 | IPF10277   | 4444560..4 unknown function orf19.1272                    | 10277 IPF10277   | UNCLASSI molecular_function unknown                                                                                 |
| CA0947 | 1.0 | 1.0 | 0.9 | 1.0 | CFL3       | 4445719..4 ferric reductase-like pr orf19.1270            | 10273 CaCFL3     | REGULATION OF/INTERACTION WITH CELLULAR ENVIRONMENT Other virulence attributes                                      |
| CA0948 | 1.4 | 1.1 | 0.9 | 0.8 | IPF10270   | complemer unknown function orf19.1272                     | 10270 IPF10270   | UNCLASSI molecular_function unknown                                                                                 |
| CA0949 | 1.3 | 0.9 | 0.9 | 0.9 | IPF10269   | 4450250..4 Gim complex compone orf19.8859                 | 10269 IPF10269   | CELL CYC protein binding                                                                                            |
| CA0950 | 1.0 | 1.0 | 1.0 | 0.9 | IPF3737    | complemer similar to Saccharomy orf19.1012                | 3737 IPF3737     | PROTEIN I protein binding                                                                                           |
| CA0951 | 1.0 | 1.1 | 1.1 | 1.1 | MNN6       | 4458347..4 putative golgi alpha-1, orf19.1011             | 3740 CaMNN6      | CELL FATI transferase activity                                                                                      |
| CA0952 | 0.7 | 1.0 | 0.9 | 0.9 | MNT3.3EO   | complemer Putative mannosyltransferase, 3-pr orf19.1144   | 19564 CaMNT3.3   | C-compound and carbohydrate metabolism ""PROTEIN FATE [folding modification destination] ""SUBCELLULAR LOCALISATION |
| CA0953 | 1.2 | 0.9 | 0.8 | 0.8 | IPF13166.3 | 4462120..4 unknown function, 3-pr orf19.1144              | 13166 IPF13166.3 | C-compound and carbohydrate metabolism                                                                              |
| CA0954 | 1.1 | 1.2 | 1.1 | 1.2 | IPF13162   | 4468223..4 unknown function orf19.1142                    | 13162 IPF13162   | UNCLASSI transporter activity                                                                                       |
| CA0955 | 1.1 | 1.3 | 1.0 | 1.1 | IPF13160   | complemer unknown function orf19.1140                     | 13160 IPF13160   | UNCLASSIFIED PROTEINS                                                                                               |
| CA0956 | 1.4 | 1.4 | 1.1 | 1.0 | IPF14914   | 4484183..4 putative ankyrin (by ho orf19.12191            | 14914 IPF14914   | UNCLASSI hydrolase activity                                                                                         |
| CA0957 | 0.8 | 1.0 | 1.0 | 1.1 | IPF14322   | 4489509..4 unknown function orf19.12191                   | 14322 IPF14322   | UNCLASSI molecular_function unknown                                                                                 |
| CA0958 | 0.5 | 0.5 | 0.7 | 0.8 | SEC24      | complemer component of COPII α orf19.12194                | 14321 CaSEC24    | CELLULAF protein binding                                                                                            |
| CA0959 | 0.9 | 0.3 |     | 1.2 | SAM2       | complemer S-adenosylmethionine orf19.657                  | 15535 CaSAM2     | Amino acid transferase activity                                                                                     |
| CA0960 | 1.2 | 1.0 | 1.0 | 0.8 | DDP1       | complemer Diacylglycerol Pyrophc orf19.8271               | 5432 CaDDP1      | Lipid fatty-acid and isoprenoid metabolism ""CELL CYCLE AND DNA PROCESSING CELL FATE                                |
| CA0961 | 0.6 | 1.0 | 1.1 | 0.9 | IPF18822   | 4509850..4 unknown function orf19.3720                    | 18822 IPF18822   | C-compound and carbohydrate metabolism CELL CYCLE AND DNA PROCESSING CELLULAR TRANSPORT AND TRANSP                  |
| CA0962 | 3.4 | 1.4 | 2.2 | 0.9 | IPF9145    | complemer unknown function orf19.6245                     | 9145 IPF9145     | No significant S.c. match                                                                                           |
| CA0963 | 0.9 | 1.4 | 1.1 | 0.9 | IPF9143    | complemer similar to Saccharomy orf19.6246                | 9143 IPF9143     | PROTEIN I transferase activity                                                                                      |

|        |     |     |     |     |            |                                     |             |       |            |                                                                                                                 |
|--------|-----|-----|-----|-----|------------|-------------------------------------|-------------|-------|------------|-----------------------------------------------------------------------------------------------------------------|
| CA0964 | 1.1 | 0.8 |     | 1.0 | IPF9141    | complemer similar to Saccharomy     | orf19.6247  | 9141  | IPF9141    | CELL CYC DNA binding                                                                                            |
| CA0965 | 0.9 | 1.0 | 1.3 |     | IPF9139    | 4524296..4 unknown function         | orf19.6248  | 9139  | IPF9139    | No significant S.c. match                                                                                       |
| CA0966 | 1.3 | 1.0 | 1.1 | 0.8 | IPF9136.5f | 4526750..4 potassium transporter,   | orf19.6249  | 9136  | IPF9136.5e | CELL RESCUE DEFENSE AND VIRULENCE ""TRANSPORT FACILITATION                                                      |
| CA0968 | 1.0 | 0.9 | 1.1 | 1.0 | SAP6       | 4534813..4 secreted aspartyl prote  | orf19.12988 | 12747 | CaSAP6     | PROTEIN FATE [folding modification destination] ""CELL FATE SUBCELLULAR LOCALISATION Other virulence attributes |
| CA0969 | 1.8 | 0.9 | 1.1 | 1.0 | IPF9132    | 4538352..4 unknown function         | orf19.12987 | 9132  | IPF9132    | UNCLASSI molecular_function unknown                                                                             |
| CA0970 | 0.8 | 0.9 | 0.9 | 0.9 | IPF10894   | complemer unknown function          | orf19.10340 | 10894 | IPF10894   | CELLULAF protein binding                                                                                        |
| CA0971 | 0.8 | 1.4 | 0.9 | 1.3 | IPF11428   | complemer unknown function          | orf19.6470  | 11428 | IPF11428   | CELL RESCUE DEFENSE AND VIRULENCE ""REGULATION OF/INTERACTION WITH CELLULAR ENVIRONMENT SUBCE                   |
| CA0972 | 0.6 | 1.5 | 1.1 | 1.1 | CYP1       | 4559821..4 cyclophilin (peptidylpro | orf19.6472  | 17713 | CaCYP1     | PROTEIN isomerase activity                                                                                      |
| CA0973 | 1.2 | 1.0 | 1.6 | 1.0 | IPF12662   | complemer unknown function          | orf19.6474  | 12662 | IPF12662   | No significant S.c. match                                                                                       |
| CA0975 | 0.8 | 1.3 | 1.7 | 1.1 | IPF18811   | complemer unknown function          |             | 18811 | IPF18811   | No significant S.c. match                                                                                       |
| CA0976 | 1.1 | 1.0 | 1.1 | 1.0 | PEX17      | 4567179..4 Peroxisomal periphera    | orf19.11088 | 17165 | CaPEX17    | No significant S.c. match                                                                                       |
| CA0977 | 0.7 | 1.0 |     | 1.1 | IPF18810   | 4568339..4 unknown function         | orf19.11087 | 18810 | IPF18810   | UNCLASSI molecular_function unknown                                                                             |
| CA0978 | 1.1 | 1.1 | 1.0 | 0.8 | IPF16222   | 4570643..4 unknown function         | orf19.3603  | 16222 | IPF16222   | UNCLASSI molecular_function unknown                                                                             |
| CA0979 | 1.7 | 1.1 | 1.1 | 0.9 | IPF19713   | 4573238..4 unknown function         | orf19.3601  | 19713 | IPF19713   | CELL CYCLE AND DNA PROCESSING CONTROL OF CELLULAR ORGANIZATION                                                  |
| CA0980 | 1.5 | 1.0 | 1.0 | 0.8 | IPF17655   | 4575038..4 unknown function         | orf19.3600  | 17655 | IPF17655   | No significant S.c. match                                                                                       |
| CA0981 | 1.8 | 1.0 | 1.3 | 1.1 | GAP4       | complemer general amino acid per    | orf19.1799  | 19644 | CaGAP4     | Amino acid metabolism CELLULAR TRANSPORT AND TRANSPORT MECHANISMS SUBCELLULAR LOCALISATION TRAN                 |
| CA0982 | 2.1 | 1.0 | 1.2 | 1.0 | IPF7397    | complemer unknown function          | orf19.1800  | 7397  | IPF7397    | UNCLASSI molecular_function unknown                                                                             |
| CA0983 | 0.4 | 0.6 | 1.0 | 1.1 | CBR1       | complemer Cytochrome-b5 reduct      | orf19.1801  | 7398  | CaCBR1     | ENERGY t transporter activity                                                                                   |
| CA0984 | 1.1 | 1.1 | 1.0 | 0.9 | IPF7400    | complemer unknown function          | orf19.1802  | 7400  | IPF7400    | UNCLASSI molecular_function unknown                                                                             |
| CA0985 | 0.8 | 0.9 | 1.0 | 1.0 | IPF4815    | 4598955..4 unknown Function         | orf19.3351  | 4815  | IPF4815    | No significant S.c. match                                                                                       |
| CA0986 |     | 1.4 | 0.9 | 1.0 | IPF4814    | complemer similar to Saccharomy     | orf19.3350  | 4814  | IPF4814    | PROTEIN t structural molecule activity                                                                          |
| CA0987 | 0.7 | 1.8 | 1.1 | 0.9 | RPB140     | 4601325..4 DNA-dependent RNA t      | orf19.3349  | 4811  | CaRPB140   | TRANSCR nucleotidyltransferase activity                                                                         |
| CA0988 | 0.5 | 0.9 | 0.9 | 1.1 | PMI40      | complemer mannose-6-phosphate       | orf19.8968  | 19894 | CaPMI40    | C-compour isomerase activity                                                                                    |
| CA0989 | 1.6 | 1.0 | 1.1 | 0.9 | IPF11069   | 4610365..4 unknown function         | orf19.1391  | 11069 | IPF11069   | No significant S.c. match                                                                                       |
| CA0990 | 1.0 | 1.0 | 1.2 | 1.2 | IPF11068   | complemer unknown function          | orf19.1392  | 11068 | IPF11068   | PROTEIN t oxidoreductase activity, isomerase activity                                                           |
| CA0991 |     | 1.0 | 0.9 | 1.1 | IPF11065   | complemer unknown function          | orf19.8971  | 11065 | IPF11065   | Metabolism transporter activity                                                                                 |
| CA0992 | 1.0 | 1.0 | 1.2 | 1.2 | IPF11063   | 4615600..4 unknown function         | orf19.8972  | 11063 | IPF11063   | UNCLASSI molecular_function unknown                                                                             |
| CA0993 | 1.0 | 0.9 | 0.9 | 0.9 | IPF11059   | 4618933..4 unknown function         | orf19.8973  | 11059 | IPF11059   | No significant S.c. match                                                                                       |
| CA0994 | 0.9 | 0.8 | 1.0 | 1.2 | IPF10077   | complemer 3-oxoacid CoA-transfe     | orf19.2281  | 10077 | IPF10077   | No significant S.c. match                                                                                       |
| CA0995 | 1.3 | 1.0 | 1.1 | 0.8 | IPF10074   | complemer unknown function          | orf19.9822  | 10074 | IPF10074   | No significant S.c. match                                                                                       |
| CA0996 | 0.5 | 1.0 | 1.3 | 1.2 | IPF10071   | complemer catabolic 3-dehydroqui    | orf19.9823  | 10071 | IPF10071   | No significant S.c. match                                                                                       |
| CA0997 | 1.1 | 0.9 | 1.0 | 0.8 | IPF9998    | 4626016..4 unknown function         | orf19.9824  | 9998  | IPF9998    | No significant S.c. match                                                                                       |
| CA0998 | 1.8 | 1.1 | 1.1 | 1.1 | IPF12369   | 4630065..4 Putative dipeptidase (b  | orf19.11846 | 12369 | IPF12369   | UNCLASSIFIED PROTEINS                                                                                           |
| CA0999 | 1.0 | 1.2 | 1.1 | 1.0 | IPF12368   | complemer unknown function          | orf19.11847 | 12368 | IPF12368   | TRANSCRIPTION                                                                                                   |
| CA1000 | 4.3 | 1.4 | 1.7 | 1.1 | IPF6011    | complemer unknown function          | orf19.9061  | 6011  | IPF6011    | No significant S.c. match                                                                                       |
| CA1001 | 1.3 | 1.0 | 1.0 | 0.9 | IPF6006    | complemer unknown function          | orf19.9065  | 6006  | IPF6006    | No significant S.c. match                                                                                       |
| CA1002 | 1.1 | 1.0 | 1.1 | 0.9 | ROK1.3     | 4651226..4 RNA helicase, 3-prime    | orf19.3756  | 8903  | CaROK1.3   | TRANSCR RNA binding, helicase activity                                                                          |
| CA1003 | 0.7 | 1.0 | 0.9 | 0.9 | ATP20      | complemer F1FO-ATPase complex       | orf19.3757  | 8902  | CaATP20    | ENERGY t structural molecule activity                                                                           |
| CA1004 | 1.5 | 0.9 |     | 1.1 | IPF8901    | complemer unknown function          | orf19.3758  | 8901  | IPF8901    | UNCLASSI molecular_function unknown                                                                             |
| CA1005 | 1.9 | 1.4 | 1.2 | 1.2 | LPG7       | 4656011..4 probable membrane pr     | orf19.3759  | 8898  | CaLPG7     | TRANSCR transcription regulator activity                                                                        |
| CA1007 | 1.0 | 0.9 | 1.3 | 1.0 | DLH1.3f    | 4657823..4 meiotic recombination    | orf19.3760  | 8895  | CaDLH1.3f  | CELL CYC DNA binding                                                                                            |
| CA1008 | 1.0 | 0.9 | 0.7 | 1.0 | IPF14083   | complemer similarity to Saccharon   | orf19.6254  | 14083 | IPF14083   | UNCLASSI transporter activity                                                                                   |
| CA1009 | 0.7 | 1.1 | 1.1 | 1.0 | IPF14084   | complemer unknown function          | orf19.6255  | 14084 | IPF14084   | UNCLASSI molecular_function unknown                                                                             |
| CA1010 | 6.2 | 1.2 | 3.9 | 0.9 | GLT1.3eO   | complemer glutamate synthase (N     | orf19.6257  | 19715 | CaGLT1.3e  | Amino acid oxidoreductase activity                                                                              |
| CA1011 | 0.8 | 1.1 | 1.0 | 1.1 | SRP101     | 4673540..4 signal recognition parti | orf19.11434 | 19895 | CaSRP101   | PROTEIN FATE [folding modification destination] ""SUBCELLULAR LOCALISATION                                      |
| CA1012 | 1.2 | 1.0 | 0.5 | 1.0 | PSD2.5F    | 4675908..4 phosphatidylserine dec   | orf19.11436 | 14208 | CaPSD2.5f  | Lipid fatty-t lyase activity                                                                                    |
| CA1014 | 0.7 | 1.1 | 1.0 | 0.9 | MES1       | complemer methionyl-tRNA synthe     | orf19.11437 | 15550 | CaMES1     | PROTEIN t ligase activity                                                                                       |
| CA1015 | 1.2 | 0.9 | 1.0 | 1.1 | IPF15547   | 4682821..4 putative glutamyl-tRNA   | orf19.11438 | 15547 | IPF15547   | Nitrogen ar hydrolase activity                                                                                  |
| CA1016 | 0.7 | 1.1 | 0.9 | 1.1 | IPF11142   | complemer unknown function          | orf19.473   | 11142 | IPF11142   | CELL RES transporter activity                                                                                   |
| CA1017 | 1.2 | 0.8 | 0.9 | 0.8 | IPF11144   | complemer unknown function          | orf19.8105  | 11144 | IPF11144   | UNCLASSI molecular_function unknown                                                                             |
| CA1018 | 1.3 | 1.0 | 0.9 | 1.0 | IPF13479.3 | 4696683..4 unknown function, 3-pr   | orf19.3768  | 13479 | IPF13479.3 | C-compound and carbohydrate metabolism TRANSCRIPTION SUBCELLULAR LOCALISATION                                   |
| CA1019 | 0.8 | 1.1 | 0.9 | 1.1 | IPF13485   | 4700804..4 unknown function         | orf19.3769  | 13485 | IPF13485   | TRANSPO molecular_function unknown                                                                              |
| CA1020 | 1.0 | 0.9 | 0.9 | 1.2 | IPF4824    | complemer unknown function          | orf19.10863 | 4824  | IPF4824    | UNCLASSI molecular_function unknown                                                                             |
| CA1022 | 3.9 | 6.6 | 3.3 | 1.2 | IPF4820    | complemer putative complex I inter  | orf19.10861 | 4820  | IPF4820    | No significant S.c. match                                                                                       |
| CA1023 | 1.5 | 1.3 | 1.1 | 1.2 | IPF4817    | 4722193..4 unknown Function         | orf19.10860 | 4817  | IPF4817    | CLASSIFICATION NOT YET CLEAR-CUT                                                                                |
| CA1024 | 3.0 | 2.3 | 1.8 | 1.0 | CAR1       | complemer arginase by homology      | orf19.3934  | 10187 | CaCAR1     | Amino acid hydrolase activity                                                                                   |
| CA1025 | 2.2 | 1.2 | 1.4 | 1.2 | IPF10184   | 4728318..4 unknown function         | orf19.3936  | 10184 | IPF10184   | UNCLASSI molecular_function unknown                                                                             |
| CA1026 | 1.1 | 1.0 | 1.2 | 0.9 | IPF19645.4 | 4732034..4 unknown function, exo    | orf19.3937  | 19646 | IPF19645.4 | UNCLASSIFIED PROTEINS                                                                                           |
| CA1027 | 1.6 | 1.4 | 1.2 | 0.8 | IPF19645.4 | 4732648..4 unknown function, exon 2 |             | 19645 | IPF19645.4 | UNCLASSI molecular_function unknown                                                                             |
| CA1028 | 1.0 | 1.0 | 1.1 | 0.9 | IPF6488    | 4743360..4 unknown function         | orf19.1539  | 6488  | IPF6488    | No significant S.c. match                                                                                       |
| CA1029 | 0.9 |     | 1.0 | 1.6 | TLG2       | 4746077..4 Syntaxin family of t-SN  | orf19.9112  | 14397 | CaTLG2     | PROTEIN t transporter activity                                                                                  |
| CA1030 | 1.0 | 0.8 | 1.0 | 1.0 | ZRC1       | complemer Zinc and cadmium resi     | orf19.9111  | 14395 | CaZRC1     | CELLULAF transporter activity                                                                                   |
| CA1031 | 1.2 | 1.3 | 1.1 | 0.9 | IPF17469   | 4752283..4 unknown function         | orf19.3848  | 17469 | IPF17469   | No significant S.c. match                                                                                       |
| CA1032 | 0.9 | 1.1 | 0.8 | 1.0 | IPF19896   | complemer unknown function          | orf19.3852  | 19896 | IPF19896   | No significant S.c. match                                                                                       |
| CA1033 | 0.8 | 1.0 | 1.1 | 0.8 | MAD2       | complemer spindle checkpoint con    | orf19.8642  | 17891 | CaMAD2     | CELL CYC molecular_function unknown                                                                             |
| CA1034 | 1.7 | 1.1 | 1.1 | 0.8 | BET4.EXO   | 4776433..4 alpha subunit of geran   | orf19.8641  | 17890 | CaBET4.ex  | Lipid fatty-t transferase activity                                                                              |
| CA1035 | 1.0 | 1.1 | 1.0 | 1.0 | IFI2.3F    | complemer unknown function, 3-pr    | orf19.1038  | 13751 | CaIFI2.3f  | No significant S.c. match                                                                                       |
| CA1037 | 1.4 | 1.1 | 1.1 | 0.9 | MNS1       | complemer Alpha1,2-mannosidase      | orf19.8638  | 6163  | CaMNS1     | C-compour hydrolase activity                                                                                    |
| CA1038 | 1.8 | 1.1 | 1.2 | 0.9 | IPF6159    | 4784798..4 unknown function         | orf19.8637  | 6159  | IPF6159    | TRANSCR DNA binding, transcription regulator activity                                                           |
| CA1039 | 1.7 | 1.2 | 1.6 | 0.9 | IPF4012    | 4791807..4 Unknown Function         | orf19.2501  | 4012  | IPF4012    | UNCLASSI molecular_function unknown                                                                             |
| CA1040 | 1.3 | 1.0 | 1.2 | 1.0 | IPF4010    | complemer unknown function          | orf19.2503  | 4010  | IPF4010    | No significant S.c. match                                                                                       |

|        |     |     |     |     |            |                                                  |                  |                                                                                                    |
|--------|-----|-----|-----|-----|------------|--------------------------------------------------|------------------|----------------------------------------------------------------------------------------------------|
| CA1041 | 1.5 | 0.9 | 1.0 | 1.1 | BMS1       | 4795951..4 probable membrane prorf19.2504        | 4009 CaBMS1      | TRANSCRIPTION                                                                                      |
| CA1042 | 1.4 | 1.0 | 0.7 | 1.0 | IPF18784   | 4802829..4 unknown function orf19.2506           | 18784 IPF18784   | No significant S.c. match                                                                          |
| CA1043 | 1.2 | 1.1 | 0.9 | 0.9 | TOM6       | complemer mitochondrial outer meorf19.9219       | 15801 CaTOM6     | PROTEIN Itransporter activity                                                                      |
| CA1044 | 0.7 | 1.2 | 0.8 | 1.0 | RNA1       | 4804962..4 GTPase activating protorf19.9218      | 11621 CaRNA1     | TRANSCR enzyme regulator activity                                                                  |
| CA1045 | 1.1 | 1.1 | 0.9 | 1.1 | IPF11620   | 4806328..4 similar to Saccharomyorf19.1648       | 11620 IPF11620   | CELL CYC protein binding                                                                           |
| CA1046 | 1.1 | 1.0 | 1.1 | 0.9 | IPF11617   | complemer unknown function orf19.1647            | 11617 IPF11617   | CELL CYC transferase activity                                                                      |
| CA1047 | 1.5 | 1.2 | 0.9 | 0.9 | IPF11615   | 4811687..4 RNA-binding proteins (orf19.9215)     | 11615 IPF11615   | CLASSIFICRNA binding                                                                               |
| CA1048 | 1.0 | 0.9 | 1.1 | 0.9 | IPF15394   | complemer unknown function orf19.3899            | 15394 IPF15394   | UNCLASSIDNA binding                                                                                |
| CA1049 | 1.0 | 0.9 | 0.9 | 0.9 | TLG1       | 4818309..4 tSNARE that affects a orf19.3898      | 15393 CaTLG1     | PROTEIN Itransporter activity                                                                      |
| CA1050 | 0.8 | 1.0 | 1.1 | 1.0 | IPF19897   | complemer unknown function orf19.3897            | 19897 IPF19897   | No significant S.c. match                                                                          |
| CA1051 | 1.1 | 0.0 | 1.1 | 0.9 | CHT2       | 4824049..4 chitinase 2 precursor orf19.3895      | 15860 CaCHT2     | C-compound and carbohydrate metabolism CELL CYCLE AND DNA PROCESSING SUBCELLULAR LOCALISATION      |
| CA1052 | 1.0 | 0.7 | 1.1 | 0.9 | IPF15861   | 4826085..4 unknown function orf19.3894           | 15861 IPF15861   | No significant S.c. match                                                                          |
| CA1053 | 1.2 | 0.9 | 1.0 | 0.9 | SCW11.3E   | complemer glucanase gene family orf19.3893       | 15862 CaSCW11.   | CLASSIFIChydrolase activity                                                                        |
| CA1054 | 1.2 | 0.8 | 1.0 | 0.8 | SAS3       | 4831154..4 silencing protein (by hc orf19.2540)  | 16878 CaSAS3     | TRANSCR transferase activity                                                                       |
| CA1055 | 1.2 | 1.0 | 0.9 | 0.8 | IPF17504   | complemer unknown function orf19.2541            | 17504 IPF17504   | UNCLASSImolecular_function unknown                                                                 |
| CA1056 | 0.8 | 0.8 | 0.9 | 1.0 | IPF17503   | 4835212..4 protein folding and stat orf19.2542   | 17503 IPF17503   | PROTEIN FATE [folding modification destination]                                                    |
| CA1057 | 0.8 | 0.8 | 0.9 | 1.1 | IPF17031   | 4836330..4 unknown function orf19.2544           | 17031 IPF17031   | UNCLASSIhydrolase activity                                                                         |
| CA1058 | 0.9 | 1.2 | 1.0 | 1.1 | DOT6       | complemer involved in derepressio orf19.2545     | 19898 CaDOT6     | TRANSCR molecular_function unknown                                                                 |
| CA1059 | 0.9 | 0.8 | 0.9 | 1.0 | TRP2       | complemer anthranilate synthase orf19.10080      | 13684 CaTRP2     | Amino acid lyase activity                                                                          |
| CA1060 | 1.3 | 1.0 | 1.2 | 1.0 | IPF11460   | complemer unknown function orf19.267             | 11460 IPF11460   | TRANSCR DNA binding                                                                                |
| CA1061 | 1.5 | 0.8 | 1.0 | 1.0 | IPF19720.¿ | 4860128..4 unknown function, 3-pr orf19.12113    | 19720 IPF19720.¿ | No significant S.c. match                                                                          |
| CA1062 | 2.3 | 0.9 | 1.2 | 0.8 | IPF14165   | complemer unknown function orf19.4642            | 14165 IPF14165   | No significant S.c. match                                                                          |
| CA1063 | 1.0 | 1.1 | 1.0 | 1.1 | NMT1       | 4866803..4 N-myristoyltransferase orf19.4641     | 15592 CaNMT1     | Lipid fatty-¿transferase activity                                                                  |
| CA1064 | 0.8 | 1.2 | 1.1 | 1.0 | PWP1       | 4868492..4 beta-transducin superf orf19.12110    | 15595 CaPWP1     | UNCLASSImolecular_function unknown                                                                 |
| CA1065 | 1.5 | 1.0 | 1.0 | 0.9 | IPF9002    | complemer unknown function orf19.12108           | 9002 IPF9002     | No significant S.c. match                                                                          |
| CA1066 | 1.3 | 1.0 | 1.1 | 0.8 | IPF9001    | 4871411..4 unknown function orf19.12107          | 9001 IPF9001     | UNCLASSImolecular_function unknown                                                                 |
| CA1067 | 0.1 | 0.1 | 0.1 | 0.2 | HXT62      | 4876157..4 sugar transporter orf19.2023          | 4109 CaHXT62     | C-compour transporter activity                                                                     |
| CA1069 | 0.3 | 0.4 | 0.6 | 0.3 | HXT5.3F    | 4880221..4 sugar transporter, 3-pr orf19.2021    | 18773 CaHXT5.3F  | C-compound and carbohydrate metabolism CELLULAR TRANSPORT AND TRANSPORT MECHANISMS SUBCELLULAR LO¿ |
| CA1070 | 0.4 | 0.4 | 0.8 | 0.5 | HXT61      | 4881908..4 sugar transporter orf19.2020          | 4104 CaHXT61     | C-compour transporter activity                                                                     |
| CA1071 | 0.2 | 0.8 | 0.9 | 1.0 | IPF16624   | complemer unknown function orf19.2534            | 16624 IPF16624   | UNCLASSImolecular_function unknown                                                                 |
| CA1072 | 0.6 | 0.8 | 0.9 | 1.0 | SBH1       | 4891168..4 involved in translocation into the ER | 4995 CaSBH1      | PROTEIN Itransporter activity                                                                      |
| CA1073 | 1.2 | 1.1 | 0.8 | 0.8 | PRORS.3F   | complemer prolyl-tRNA synthetase orf19.2533      | 4994 CaPRORS     | PROTEIN Iligase activity                                                                           |
| CA1074 | 1.0 | 0.9 | 1.1 | 0.9 | PRORS.5F   | complemer prolyl-tRNA synthetase orf19.2532      | 4992 CaPRORS     | PROTEIN SYNTHESIS                                                                                  |
| CA1075 | 1.7 | 1.9 | 1.1 | 0.9 | IPF4991    | complemer putative membrane prc orf19.2531       | 4991 IPF4991     | CELLULAR TRANSPORT AND TRANSPORT MECHANISMS SUBCELLULAR LOCALISATION                               |
| CA1076 | 1.0 |     | 1.1 | 1.2 | IPF19721   | complemer similar to Saccharomyorf19.2239        | 19721 IPF19721   | CELL CYC enzyme regulator activity                                                                 |
| CA1077 | 1.4 | 0.9 | 0.9 | 0.9 | IPF13694   | complemer unknown function orf19.2238            | 13694 IPF13694   | CELL CYCLE AND DNA PROCESSING                                                                      |
| CA1078 | 0.8 | 1.1 | 1.0 | 1.0 | SPR1       | complemer exo-1,3-beta-glucanas orf19.2237       | 19900 CaSPR1     | C-compound and carbohydrate metabolism CELL FATE SUBCELLULAR LOCALISATION                          |
| CA1079 | 0.9 | 1.0 | 1.2 | 1.0 | LIP1       | 4913733..4 Secretary lipase orf19.4821           | 14712 CaLIP1     | Other virulence attributes                                                                         |
| CA1080 | 1.5 | 1.0 | 1.1 | 0.9 | IPF14710   | complemer unknown function orf19.4820            | 14710 IPF14710   | UNCLASSImolecular_function unknown                                                                 |
| CA1081 | 1.5 | 1.3 |     | 1.2 | IPF14797.¿ | complemer unknown function, 3-prime end          | 14799 IPF14797.¿ | No significant S.c. match                                                                          |
| CA1082 | 1.6 | 1.1 | 1.1 | 1.0 | IPF14797   | complemer unknown function orf19.4818            | 14797 IPF14797   | No significant S.c. match                                                                          |
| CA1083 | 0.7 | 1.0 | 1.2 | 0.9 | IPF1034    | complemer Similarity to transcripti orf19.12042  | 1034 IPF1034     | TRANSCRIPTION                                                                                      |
| CA1084 | 1.7 | 1.2 | 1.0 | 0.9 | IPF1036    | complemer unknown function orf19.4571            | 1036 IPF1036     | No significant S.c. match                                                                          |
| CA1085 | 1.1 | 1.2 | 1.3 | 1.1 | IPF1038    | complemer unknown function orf19.4570            | 1038 IPF1038     | No significant S.c. match                                                                          |
| CA1086 | 1.6 | 0.9 | 1.1 | 0.8 | IPF1039    | 4932510..4 unknown function orf19.12038          | 1039 IPF1039     | No significant S.c. match                                                                          |
| CA1087 | 1.5 | 1.1 | 1.0 | 0.9 | MYO5       | complemer Myosin I (by homology orf19.8357       | 14461 CaMYO5     | CELLULAF motor activity                                                                            |
| CA1088 | 1.0 | 1.0 | 1.1 | 0.8 | IPF13319   | complemer unknown function orf19.740             | 13319 IPF13319   | TRANSCRIPTION SUBCELLULAR LOCALISATION                                                             |
| CA1089 | 1.6 | 1.2 | 1.1 | 1.1 | IPF13799   | 4947538..4 unknown function orf19.3945           | 13799 IPF13799   | UNCLASSImolecular_function unknown                                                                 |
| CA1090 | 1.1 | 1.0 | 1.2 | 1.0 | COX18      | complemer protein required for act orf19.3946    | 13798 CaCOX18    | ENERGY " molecular_function unknown                                                                |
| CA1091 | 1.3 | 1.3 | 1.1 | 1.0 | SPT4       | 4950243..4 transcription elongator orf19.3947    | 13796 CaSPT4     | CELL CYC transcription regulator activity                                                          |
| CA1092 | 1.5 | 1.1 |     | 0.9 | YTA7       | complemer 26S proteasome subur orf19.3949        | 13795 CaYTA7     | PROTEIN Ihydrolase activity                                                                        |
| CA1093 | 0.7 | 0.9 | 0.9 | 1.0 | MSM1       | complemer mitochondrial methiony orf19.3950      | 19722 CaMSM1     | PROTEIN Iligase activity                                                                           |
| CA1094 | 1.0 | 0.8 | 0.9 | 1.1 | YIP1       | complemer golgi membrane protei orf19.3951       | 16770 CaYIP1     | CELLULAF molecular_function unknown                                                                |
| CA1095 | 1.1 | 1.0 | 0.8 | 0.8 | SMC1       | 4962077..4 Chromosomal ATPase orf19.4367         | 7580 CaSMC1      | CELL CYC DNA binding                                                                               |
| CA1096 | 1.0 | 0.9 | 1.2 | 1.0 | IPF7578    | complemer unknown function orf19.4366            | 7578 IPF7578     | No significant S.c. match                                                                          |
| CA1097 | 1.2 | 1.2 | 0.9 | 1.2 | IPF7575    | 4969468..4 putative endo-exonuck orf19.4365      | 7575 IPF7575     | TRANSCRIPTION SUBCELLULAR LOCALISATION                                                             |
| CA1098 | 1.5 | 1.2 | 1.2 | 1.2 | IPF12316   | complemer unknown function                       | 12316 IPF12316   | No significant S.c. match                                                                          |
| CA1099 | 0.5 | 0.9 | 1.2 | 1.0 | IPF12312   | complemer unknown function orf19.12536           | 12312 IPF12312   | No significant S.c. match                                                                          |
| CA1100 | 2.3 | 2.3 | 2.3 | 1.0 | IPF5681    | complemer unknown function orf19.12417           | 5681 IPF5681     | No significant S.c. match                                                                          |
| CA1101 | 1.2 | 1.2 | 1.0 | 0.9 | IPF5678    | complemer Unknown function orf19.12415           | 5678 IPF5678     | No significant S.c. match                                                                          |
| CA1102 | 0.8 | 1.2 | 1.3 | 1.0 | AKR1       | 4994071..4 ankyrin repeat-containi orf19.4950    | 5675 CaAKR1      | REGULATItransferase activity                                                                       |
| CA1103 | 1.5 | 1.0 | 1.1 | 1.1 | IPF5673    | 4997664..4 similar to Saccharomyorf19.12413      | 5673 IPF5673     | Nucleotide hydrolase activity                                                                      |
| CA1104 | 0.9 | 0.8 | 0.9 | 1.4 | IPF18761   | complemer unknown function                       | 18761 IPF18761   | UNCLASSImolecular_function unknown                                                                 |
| CA1105 | 1.5 | 1.0 | 1.0 | 0.8 | IPF18760.¿ | complemer unknown function, 3-prime end          | 18760 IPF18760.¿ | No significant S.c. match                                                                          |
| CA1106 | 1.0 | 1.0 |     | 0.9 | IPF11270   | complemer unknown function orf19.12697           | 11270 IPF11270   | UNCLASSIRNA binding                                                                                |
| CA1107 | 1.0 | 0.8 | 1.1 |     | IPF11271   | complemer by homology to S. cerevisiae: ATP1     | 11271 IPF11271   | ENERGY Itransporter activity                                                                       |
| CA1108 | 1.3 | 1.0 | 1.2 | 0.8 | IPF11273   | 5006572..5 unknown function orf19.12696          | 11273 IPF11273   | No significant S.c. match                                                                          |
| CA1109 | 1.5 | 0.9 | 1.1 | 0.8 | MRPS9      | complemer ribosomal protein S9 s orf19.5230      | 11274 CaMRPS9    | PROTEIN Istructural molecule activity                                                              |
| CA1110 | 1.7 | 1.0 | 1.1 | 0.9 | DIS3       | 5009476..53-5 exoribonuclease orf19.5229         | 10406 CaDIS3     | CELL CYC RNA binding                                                                               |
| CA1111 | 0.9 | 0.8 | 1.0 | 0.9 | RIB3       | complemer 3,4-dihydroxy-2-butan orf19.12693      | 10407 CaRIB3     | Metabolism of vitamins cofactors and prosthetic groups                                             |
| CA1112 | 1.0 | 0.8 |     | 1.0 | IPF18758.¿ | complemer unknown function, 5-pr orf19.2282      | 18758 IPF18758.¿ | No significant S.c. match                                                                          |

|        |     |     |     |     |            |                                          |             |       |            |                                                                                                          |
|--------|-----|-----|-----|-----|------------|------------------------------------------|-------------|-------|------------|----------------------------------------------------------------------------------------------------------|
| CA1113 | 0.7 | 0.9 | 1.1 | 0.9 | IPF9996    | 5018610..5 unknown function              | orf19.2285  | 9996  | IPF9996    | C-compound and carbohydrate metabolism                                                                   |
| CA1114 | 0.4 | 0.7 | 0.8 | 0.9 | IPF9995    | 5020524..5 unknown function              | orf19.2286  | 9995  | IPF9995    | UNCLASSI molecular_function unknown                                                                      |
| CA1115 | 1.1 | 1.0 | 0.9 | 0.9 | RPA12      | complemer DNA-directed RNA pol           | orf19.2287  | 9993  | CaRPA12    | TRANSCR nucleotidyltransferase activity                                                                  |
| CA1116 | 0.5 | 0.8 | 1.0 | 1.0 | CCT5       | 5022582..5 T-complex protein 1, e        | orf19.2288  | 9991  | CaCCT5     | PROTEIN I chaperone activity                                                                             |
| CA1117 | 0.9 | 0.6 | 0.7 | 1.1 | ARP3       | 5024605..5 actin related protein (b      | orf19.2289  | 9988  | CaARP3     | CELLULAF structural molecule activity                                                                    |
| CA1118 | 1.2 | 1.0 | 1.4 | 1.0 | IPF9987    | 5026113..5 similar to phosphatidyl       | orf19.2290  | 9987  | IPF9987    | Lipid fatty-acid and isoprenoid metabolism ""CELL CYCLE AND DNA PROCESSING CELLULAR COMMUNICATION/SIGNAL |
| CA1119 | 1.2 | 1.0 | 1.0 | 0.8 | IPF7669.3  | 5028852..5 unknown function, 3-prime end |             | 7669  | IPF7669.3  | UNCLASSIFIED PROTEINS                                                                                    |
| CA1120 | 1.1 | 1.0 | 1.0 | 1.1 | IPF7666    | complemer unknown function               | orf19.4056  | 7666  | IPF7666    | UNCLASSIFIED PROTEINS                                                                                    |
| CA1121 | 1.1 | 0.9 | 1.1 | 1.0 | IPF6730    | complemer Unknown function               | orf19.1604  | 6730  | IPF6730    | UNCLASSI molecular_function unknown                                                                      |
| CA1122 | 0.8 | 1.0 | 0.9 | 1.0 | PMS1.3     | complemer DNA mismatch repair            | orf19.1605  | 6724  | CaPMS1.3   | CELL CYC DNA binding                                                                                     |
| CA1123 | 2.3 | 1.1 | 1.4 | 0.9 | IPF19723   | complemer similar to Saccharomy          | orf19.6261  | 19723 | IPF19723   | CELLULAF molecular_function unknown                                                                      |
| CA1124 | 0.6 | 0.9 | 1.2 | 0.9 | UBP12      | complemer ubiquitin C-terminal hy        | orf19.6260  | 12859 | CaUBP12    | PROTEIN I peptidase activity                                                                             |
| CA1125 | 1.0 | 1.1 | 1.1 | 1.2 | RRP43      | complemer rRNA processing prote          | orf19.6259  | 12854 | CaRRP43    | TRANSCR RNA binding                                                                                      |
| CA1126 | 1.5 | 1.1 | 1.0 | 0.9 | ECM18.3E   | 5081283..5 cell wall biogenesis, 3-      | orf19.3607  | 5203  | CaECM18.   | UNCLASSIFIED PROTEINS                                                                                    |
| CA1127 | 0.7 | 1.1 | 0.8 | 1.1 | MSH3       | complemer DNA mismatch repair            | orf19.3608  | 5201  | CaMSH3     | CELL CYC DNA binding                                                                                     |
| CA1128 | 0.9 | 1.1 | 0.7 | 1.1 | IPF5198    | 5086718..5 unknown function              | orf19.3609  | 5198  | IPF5198    | UNCLASSIRNA binding                                                                                      |
| CA1129 | 1.4 | 1.1 | 0.9 | 0.8 | IPF5197    | 5088566..5 unknown function              | orf19.3610  | 5197  | IPF5197    | No significant S.c. match                                                                                |
| CA1130 | 1.4 | 1.1 | 1.0 | 0.8 | NAG1       | complemer Glucosamine-6-phospl           | orf19.9703  | 2719  | CaNAG1     | No significant S.c. match                                                                                |
| CA1131 | 0.8 | 1.3 | 1.0 | 1.1 | NAG2       | 5093929..5 N-acetyl-glucosamine-         | orf19.9704  | 20073 | CaNAG2     | No significant S.c. match                                                                                |
| CA1132 | 0.9 | 1.0 | 0.9 | 0.9 | IPF2710.Ri | complemer putative permease (by          | orf19.9705  | 2717  | IPF2710.re | CELL RESCUE DEFENSE AND VIRULENCE ""TRANSPORT FACILITATION                                               |
| CA1133 | 1.2 | 1.0 | 0.9 | 1.0 | IPF2710.Ri | complemer putative permease (by          | orf19.9706  | 2710  | IPF2710.re | CELL RESCUE DEFENSE AND VIRULENCE ""TRANSPORT FACILITATION                                               |
| CA1134 | 0.9 | 1.1 | 1.0 | 1.1 | IPF2702    | 5100522..5 unknown function              | orf19.2163  | 2702  | IPF2702    | UNCLASSI molecular_function unknown                                                                      |
| CA1135 | 0.8 | 1.0 |     | 0.9 | IMP2       | 5107351..5 mitochondrial inner me        | orf19.1981  | 8699  | CaIMP2     | CELL CYC peptidase activity                                                                              |
| CA1136 | 1.0 |     | 1.1 | 1.0 | IFN2       | complemer glycerophosphoinosito          | orf19.1980  | 8698  | CaIFN2     | Lipid fatty-acid and isoprenoid metabolism ""SUBCELLULAR LOCALISATION TRANSPORT FACILITATION             |
| CA1137 | 1.1 | 1.2 | 1.2 | 1.3 | IFN1       | complemer glycerophosphoinosito          | orf19.1979  | 8694  | CaIFN1     | Lipid fatty-acid and isoprenoid metabolism ""SUBCELLULAR LOCALISATION TRANSPORT FACILITATION             |
| CA1138 | 1.3 | 1.0 | 0.9 | 1.1 | IFN3       | complemer glycerophosphoinosito          | orf19.1978  | 8692  | CaIFN3     | Lipid fatty-acid and isoprenoid metabolism ""SUBCELLULAR LOCALISATION TRANSPORT FACILITATION             |
| CA1139 | 1.1 | 1.0 | 1.1 | 1.0 | IPF9466    | complemer unknown function               | orf19.4066  | 9466  | IPF9466    | PROTEIN FATE (folding modification destination) ""CELLULAR TRANSPORT AND TRANSPORT MECHANISMS SUBCELLUL  |
| CA1140 | 1.1 | 0.9 | 0.8 | 1.0 | IPF17322.3 | complemer unknown function, 3-pr         | orf19.4068  | 9462  | IPF17322.3 | C-compound and carbohydrate metabolism TRANSCRIPTION CELL FATE SUBCELLULAR LOCALISATION                  |
| CA1141 | 0.4 | 1.0 | 1.2 | 1.0 | IPF17322.5 | complemer unknown function, 5-pr         | orf19.4069  | 9461  | IPF17322.5 | No significant S.c. match                                                                                |
| CA1142 | 1.0 | 0.9 | 1.0 | 1.0 | IPF9459    | complemer unknown function               | orf19.4070  | 9459  | IPF9459    | No significant S.c. match                                                                                |
| CA1144 | 1.4 | 1.4 | 1.5 | 0.9 | SPS19      | 5135926..5 peroxisomal 2,4-dieno         | orf19.11168 | 19650 | CaSPS19    | ENERGY oxidoreductase activity                                                                           |
| CA1145 | 1.2 | 1.0 | 1.0 | 1.1 | GCS1       | 5137053..5 ADP-ribosylation fact         | orf19.11167 | 10382 | CaGCS1     | CELL CYC protein binding                                                                                 |
| CA1146 | 1.5 | 2.1 | 2.5 | 1.1 | CWH8       | complemer putative required prote        | orf19.3682  | 10381 | CaCWH8     | PROTEIN I hydrolase activity                                                                             |
| CA1147 | 1.7 | 1.1 | 1.0 | 0.8 | KAP95      | complemer karyopherin-beta prote         | orf19.11165 | 10376 | CaKAP95    | PROTEIN I protein binding                                                                                |
| CA1148 | 1.8 | 1.3 | 2.1 | 1.0 | CAN1       | 5149963..5 amino acid permease           | (orf19.97   | 10466 | CaCAN1     | Amino acid metabolism CELLULAR TRANSPORT AND TRANSPORT MECHANISMS SUBCELLULAR LOCALISATION TRAN          |
| CA1149 | 1.4 | 1.0 | 1.0 | 0.8 | MET223     | complemer protein ser/thr phosph         | orf19.99    | 10464 | CaMET223   | Amino acid metabolism ""CELL RESCUE DEFENSE AND VIRULENCE ""                                             |
| CA1150 | 0.9 | 1.1 | 0.8 | 1.0 | RIM9       | 5154830..5 regulator for sporulatio      | orf19.101   | 10461 | CaRIM9     | CELL FATE                                                                                                |
| CA1151 | 0.6 | 1.0 | 0.9 | 1.1 | IPF10459   | complemer unknown function               | orf19.102   | 10459 | IPF10459   | CELL CYCLE AND DNA PROCESSING SUBCELLULAR LOCALISATION                                                   |
| CA1152 | 1.4 | 1.0 | 1.0 | 0.8 | IPF10457   | 5157592..5 nuclear fusion protein-l      | orf19.103   | 10457 | IPF10457   | CELL FATE SUBCELLULAR LOCALISATION                                                                       |
| CA1153 | 1.0 | 1.0 | 1.2 | 1.1 | IPF10455   | 5158194..5 unknown function              | orf19.104   | 10455 | IPF10455   | CELL CYCLE AND DNA PROCESSING                                                                            |
| CA1154 | 1.0 | 1.0 | 1.1 | 1.1 | MET221     | 5159447..5 protein ser/thr phosph        | orf19.105   | 10454 | CaMET221   | Amino acid hydrolase activity                                                                            |
| CA1155 | 1.1 | 1.0 | 1.0 | 1.0 | JA2        | complemer ATP-dependent RNA I            | orf19.107   | 10452 | CaJA2      | TRANSCR RNA binding, helicase activity                                                                   |
| CA1156 | 1.8 | 1.5 | 1.3 | 1.2 | RLR1       | 5165198..5 hypothetical regulatory       | orf19.4123  | 10133 | CaRLR1     | TRANSCRIPTION PROTEIN SYNTHESIS                                                                          |
| CA1157 | 1.0 | 1.0 | 1.0 | 1.0 | PZF1       | complemer TFIIIA (transcription ini      | orf19.4125  | 13278 | CaPZF1     | TRANSCR transcription regulator activity                                                                 |
| CA1158 | 2.6 | 1.4 | 1.7 | 0.9 | IPF13275   | 5172792..5 unknown function              | orf19.4127  | 13275 | IPF13275   | SUBCELLL molecular_function unknown                                                                      |
| CA1159 | 1.0 | 1.1 | 1.1 | 1.2 | IPF13423   | complemer unknown function               | orf19.4128  | 13423 | IPF13423   | UNCLASSIFIED PROTEINS                                                                                    |
| CA1160 | 1.0 | 1.4 | 0.9 | 1.0 | IPF10262   | 5182142..5 unknown function              | orf19.2726  | 10262 | IPF10262   | UNCLASSI molecular_function unknown                                                                      |
| CA1161 | 1.1 | 0.8 | 0.7 | 1.2 | GRX3       | 5183340..5 glutaredoxin-like protei      | orf19.2727  | 10259 | CaGRX3     | PROTEIN I oxidoreductase activity                                                                        |
| CA1162 | 1.4 | 0.9 | 0.8 | 0.8 | IPF10258   | complemer similar to Saccharomy          | orf19.2728  | 10258 | IPF10258   | CELL CYC DNA binding                                                                                     |
| CA1163 | 1.1 | 0.9 | 1.0 | 0.8 | IPF15357   | complemer unknown function               | orf19.2730  | 20076 | IPF15357   | TRANSCR transcription regulator activity                                                                 |
| CA1164 | 1.0 | 1.2 | 1.3 | 1.2 | ARP8       | 5191111..5 actin-related protein (b      | orf19.10867 | 14479 | CaARP8     | SUBCELLL molecular_function unknown                                                                      |
| CA1165 | 1.5 | 1.3 | 1.3 | 1.0 | IPF19902   | 5196466..5 unknown function              | orf19.10868 | 19902 | IPF19902   | No significant S.c. match                                                                                |
| CA1166 | 0.8 | 1.0 | 0.9 | 1.1 | IFO1       | 5204897..5 Unknown function              | orf19.1780  | 16648 | CaIFO1     | UNCLASSIFIED PROTEINS                                                                                    |
| CA1167 | 0.2 | 0.6 | 0.3 | 0.9 | IPF16646   | 5206503..5 unknown function              | orf19.1782  | 16646 | IPF16646   | UNCLASSI molecular_function unknown                                                                      |
| CA1168 | 1.0 | 1.4 | 1.4 | 0.9 | IPF13017   | complemer unknown function               | orf19.1785  | 13017 | IPF13017   | No significant S.c. match                                                                                |
| CA1169 | 0.8 | 0.8 | 1.2 | 1.0 | IPF16120.3 | 5217924..5 unknown function, 3-pr        | orf19.2751  | 13270 | IPF16120.3 | TRANSPORT FACILITATION                                                                                   |
| CA1170 | 1.1 | 1.0 | 1.1 | 1.0 | IPF13268   | complemer unknown function               | orf19.2749  | 13268 | IPF13268   | UNCLASSI molecular_function unknown                                                                      |
| CA1171 | 1.3 | 0.8 | 1.0 |     | IPF13264   | 5222162..5 zinc-finger transcrip         | orf19.2748  | 13264 | IPF13264   | Amino acid metabolism Nitrogen and sulphur metabolism TRANSCRIPTION SUBCELLULAR LOCALISATION             |
| CA1172 | 1.2 | 1.3 | 0.9 | 1.4 | RGT1       | 5228722..5 Regulator of glucose-ir       | orf19.2747  | 14445 | CaRGT1     | C-compound DNA binding                                                                                   |
| CA1173 | 1.0 | 1.0 | 1.1 | 1.0 | IPF14254   | complemer unknown function               | orf19.4768  | 14254 | IPF14254   | No significant S.c. match                                                                                |
| CA1174 | 1.1 | 1.2 | 1.2 | 1.0 | IPF14255   | complemer unknown function               | orf19.4767  | 14255 | IPF14255   | TRANSCRIPTION                                                                                            |
| CA1175 | 1.7 | 1.5 | 1.3 | 0.9 | ARG81      | 5242145..5 transcription factor pos      | orf19.4766  | 14033 | CaARG81    | Amino acid transcription regulator activity                                                              |
| CA1176 | 0.9 | 1.1 | 1.1 | 1.0 | CHS5       | 5250988..5 Chitin biosynthesis pro       | orf19.807   | 5058  | CaCHS5     | C-compour molecular_function unknown                                                                     |
| CA1177 | 0.8 | 1.2 | 1.0 | 0.9 | VMA7       | complemer vacuolar ATPase (by h          | orf19.806   | 5061  | CaVMA7     | CELLULAF transporter activity                                                                            |
| CA1178 | 0.9 | 0.9 | 0.9 | 1.0 | IPF5062    | 5253582..5 unknown function              | orf19.805   | 5062  | IPF5062    | UNCLASSI molecular_function unknown                                                                      |
| CA1179 | 0.8 | 1.1 | 1.2 | 1.0 | IPF5064    | complemer ADP/ATP carrier prote          | orf19.804   | 5064  | IPF5064    | Nucleotide transporter activity                                                                          |
| CA1180 | 1.0 | 1.2 | 0.7 | 0.9 | UGA12.3F   | complemer 4-aminobutyrate aminc          | orf19.803   | 19652 | CaUGA12.   | Amino acid metabolism Nitrogen and sulphur metabolism                                                    |
| CA1181 | 1.7 | 1.2 | 1.1 | 1.0 | UGA12.5F   | complemer 4-aminobutyrate aminc          | orf19.802   | 19651 | CaUGA12.   | Amino acid metabolism Nitrogen and sulphur metabolism                                                    |
| CA1182 | 1.2 | 1.2 | 1.0 | 1.4 | IPF19724   | 5258815..5 similar to Saccharomy         | orf19.801   | 19724 | IPF19724   | SUBCELLL DNA binding                                                                                     |
| CA1183 | 1.4 | 1.0 | 1.1 | 0.9 | IPF14805   | complemer acetyl-coenzyme A tra          | orf19.11263 | 14805 | IPF14805   | UNCLASSI molecular_function unknown                                                                      |
| CA1184 | 1.2 | 1.1 | 0.9 | 0.9 | IPF14802   | 5268529..5 unknown function              |             | 14802 | IPF14802   | UNCLASSI molecular_function unknown                                                                      |



|        |     |     |     |     |           |                                                  |             |       |           |                                                                                                         |
|--------|-----|-----|-----|-----|-----------|--------------------------------------------------|-------------|-------|-----------|---------------------------------------------------------------------------------------------------------|
| CA1185 | 1.1 | 0.9 | 1.0 | 0.8 | IPF19903  | complemer unknown function                       | orf19.11264 | 19903 | IPF19903  | No significant S.c. match                                                                               |
| CA1186 | 0.8 | 0.9 | 0.9 | 0.9 | IPF6930   | 5272287..5 unknown function                      | orf19.3785  | 6930  | IPF6930   | PROTEIN FATE [folding modification destination]                                                         |
| CA1187 | 0.6 | 0.9 | 0.9 | 1.0 | QR17      | complemer putative glycoprotease                 | orf19.11267 | 19904 | CaQR17    | PROTEIN I:molecular_function unknown                                                                    |
| CA1188 | 0.1 | 0.8 | 0.8 | 1.0 | RPL30.3   | complemer RNA binding, 3-prime end (by hom       |             | 6920  | CaRPL30.3 | PROTEIN I:structural_molecule activity                                                                  |
| CA1189 | 0.5 | 0.6 | 0.7 | 1.0 | RPL24A    | 5276914..5 ribosomal protein L24 (orf19.11269    |             | 18743 | CaRPL24A  | PROTEIN I:RNA binding                                                                                   |
| CA1190 | 0.7 | 0.8 |     | 1.0 | CIP1      | 5280520..5 Cadmium induced prot                  | orf19.7761  | 11929 | CaCIP1    | No significant S.c. match                                                                               |
| CA1191 | 8.9 | 7.2 |     | 2.5 | CAN2      | 5283094..5 amino acid permease (orf19.111        |             | 11927 | CaCAN2    | Amino acid transporter activity                                                                         |
| CA1192 | 5.3 | 1.4 | 2.4 | 1.2 | IPF11926  | complemer unknown function                       |             | 11926 | IPF11926  | No significant S.c. match                                                                               |
| CA1193 | 1.6 | 1.0 | 0.8 | 1.0 | MSY1      | complemer tyrosyl-tRNA synthetase                | orf19.7756  | 11923 | CaMSY1    | PROTEIN I:ligase activity                                                                               |
| CA1194 | 1.2 | 1.0 | 1.0 | 1.0 | MET222    | complemer protein ser/thr phospho                | orf19.7752  | 17216 | CaMET222  | Amino acid metabolism ""CELL RESCUE DEFENSE AND VIRULENCE ""                                            |
| CA1195 | 0.9 | 0.8 | 1.1 | 1.0 | KAR5      | complemer nuclear fusion protein-1               | orf19.7750  | 17213 | CaKAR5    | CELL FATI:molecular_function unknown                                                                    |
| CA1196 | 0.9 | 0.9 | 0.9 | 1.0 | IPF10394  | complemer unknown function                       |             | 10394 | IPF10394  | No significant S.c. match                                                                               |
| CA1197 | 0.9 | 1.1 | 1.1 | 0.9 | IFG1      | complemer probable d-amino acid                  | orf19.10873 | 10395 | CaIFG1    | No significant S.c. match                                                                               |
| CA1198 | 0.9 | 1.1 | 1.1 | 1.0 | IPF10399  | 5299982..5 unknown function                      | orf19.10875 | 10399 | IPF10399  | UNCLASSI:structural_molecule activity                                                                   |
| CA1199 | 7.0 | 1.1 | 5.3 | 1.0 | IPF10404  | 5304747..5 unknown function                      | orf19.10876 | 10404 | IPF10404  | UNCLASSI:molecular_function unknown                                                                     |
| CA1200 | 1.0 | 0.9 | 1.2 | 1.0 | IPF10223  | complemer putative serine/threonin               | orf19.12331 | 10223 | IPF10223  | CELL CYC protein kinase activity                                                                        |
| CA1201 | 1.2 | 1.0 | 1.1 | 1.1 | IPF19906  | 5315004..5 unknown function                      | orf19.4869  | 19906 | IPF19906  | Nitrogen and sulphur metabolism TRANSCRIPTION SUBCELLULAR LOCALISATION                                  |
| CA1202 | 1.2 | 1.0 | 1.0 | 1.2 | DBP3      | 5316825..5 ATP-dependent RNA t                   | orf19.12334 | 10215 | CaDBP3    | TRANSCR RNA binding,helicase activity                                                                   |
| CA1203 | 2.6 | 2.4 | 2.0 | 0.9 | IPF3937   | complemer Unknown function                       | orf19.8487  | 3937  | IPF3937   | No significant S.c. match                                                                               |
| CA1204 | 0.8 | 1.2 | 1.2 | 1.0 | IPF14524  | 5328163..5 unknown function                      | orf19.8486  | 14524 | IPF14524  | REGULATI:oxidoreductase activity                                                                        |
| CA1205 | 1.2 | 1.0 | 1.1 | 0.9 | SSK2      | complemer MAP kinase kinase kin                  | orf19.11257 | 13431 | CaSSK2    | CELL RES protein kinase activity,signal transducer activity                                             |
| CA1206 | 1.0 | 1.0 | 1.0 | 1.3 | HUB1      | 5339823..5 Ubiquitin-like modifier (by homology) |             | 15404 | CaHUB1    | UNCLASSIFIED PROTEINS                                                                                   |
| CA1207 | 1.0 | 1.1 | 1.0 | 0.9 | PPG1      | complemer Phosphoprotein phosph                  | orf19.11256 | 18739 | CaPPG1    | ENERGY protein phosphatase activity                                                                     |
| CA1208 | 0.8 | 1.2 | 1.0 | 1.1 | IPF17195  | 5342795..5 unknown function                      | orf19.11255 | 17195 | IPF17195  | TRANSCRIPTION SUBCELLULAR LOCALISATION                                                                  |
| CA1209 | 1.2 | 1.1 | 1.1 | 1.0 | ARG8      | complemer acetylornithine aminotr                | orf19.11254 | 13486 | CaARG8    | Amino acid transferase activity                                                                         |
| CA1210 | 0.8 | 1.3 | 0.7 | 1.1 | IPF7030   | 5350146..5 unknown function                      | orf19.7778  | 7030  | IPF7030   | TRANSCR hydrolase activity                                                                              |
| CA1211 | 0.9 | 1.0 | 0.7 | 0.9 | IPF7031.3 | complemer unknown function, 3-prime end          |             | 7031  | IPF7031.3 | UNCLASSI:molecular_function unknown                                                                     |
| CA1212 | 1.1 | 1.1 | 1.2 | 1.0 | IPF7033   | complemer unknown function                       | orf19.7777  | 7033  | IPF7033   | TRANSCR RNA binding                                                                                     |
| CA1213 | 0.8 | 1.2 | 0.8 | 1.0 | VPS15.5F  | 5353439..5 serine/threonine protei               | orf19.7776  | 7035  | CaVPS15.5 | PROTEIN I:protein kinase activity                                                                       |
| CA1214 | 1.5 | 1.1 | 1.0 | 0.9 | VPS15.53F | 5355345..5 serine/threonine protei               | orf19.129   | 7038  | CaVPS15.5 | PROTEIN FATE [folding modification destination] ""CELLULAR TRANSPORT AND TRANSPORT MECHANISMS SUBCELLUL |
| CA1215 | 1.2 | 1.1 |     | 1.1 | VPS15.3F  | 5356875..5 serine/threonine protei               | orf19.7773  | 7041  | CaVPS15.3 | PROTEIN FATE [folding modification destination] ""CELLULAR TRANSPORT AND TRANSPORT MECHANISMS SUBCELLUL |
| CA1216 | 1.4 | 0.9 | 1.0 | 0.8 | EBP1      | 5359651..5 NADPH dehydrogenas                    | orf19.7772  | 7044  | CaEBP1    | ENERGY                                                                                                  |
| CA1217 | 1.1 | 1.0 | 0.8 | 0.8 | IPF13909  | complemer Unknown function                       | orf19.7770  | 13909 | IPF13909  | No significant S.c. match                                                                               |
| CA1218 | 0.8 | 0.9 | 1.1 | 0.9 | CDC20     | complemer anaphase promoting c                   | orf19.7769  | 13908 | CaCDC20   | CELL CYC enzyme regulator activity                                                                      |
| CA1219 | 0.9 | 1.7 | 1.0 | 1.2 | PRC2      | complemer carboxypeptidase y pr                  | orf19.4135  | 14986 | CaPRC2    | PROTEIN FATE [folding modification destination] ""SUBCELLULAR LOCALISATION                              |
| CA1220 | 1.6 | 1.1 | 1.0 | 0.8 | IPF14985  | 5372398..5 unknown function                      | orf19.4134  | 14985 | IPF14985  | UNCLASSI:molecular_function unknown                                                                     |
| CA1221 | 1.2 | 1.0 | 1.1 | 0.8 | IPF14872  | 5373766..5 unknown function                      | orf19.4133  | 14872 | IPF14872  | UNCLASSI:molecular_function unknown                                                                     |
| CA1222 | 1.6 | 1.0 | 1.6 | 0.9 | IPF14871  | complemer unknown function                       | orf19.4132  | 14871 | IPF14871  | No significant S.c. match                                                                               |
| CA1223 | 1.3 | 0.9 | 1.0 | 0.9 | IPF14870  | 5376671..5 unknown function                      | orf19.4131  | 14870 | IPF14870  | UNCLASSI:molecular_function unknown                                                                     |
| CA1224 | 1.1 | 1.2 | 1.0 | 1.0 | IPF15662  | complemer unknown function                       | orf19.4156  | 15662 | IPF15662  | No significant S.c. match                                                                               |
| CA1225 | 1.7 | 2.0 | 1.3 | 1.5 | SPS20     | complemer peroxisomal 2,4-dieno                  | orf19.4157  | 15661 | CaSPS20   | ENERGY SUBCELLULAR LOCALISATION                                                                         |
| CA1226 | 1.4 | 1.0 | 0.9 | 0.7 | IPF15660  | complemer putative mitochondrial                 | orf19.4159  | 15660 | IPF15660  | CELLULAF:transporter activity                                                                           |
| CA1227 | 0.9 | 1.3 | 0.9 | 1.4 | IPF16082  | 5392948..5 unknown function                      | orf19.4160  | 16082 | IPF16082  | PROTEIN I:molecular_function unknown                                                                    |
| CA1228 | 1.3 | 1.2 | 1.1 | 0.8 | IPF16081  | complemer unknown function                       | orf19.4161  | 16081 | IPF16081  | UNCLASSI:molecular_function unknown                                                                     |
| CA1229 | 0.8 | 1.0 | 0.7 | 1.2 | MLH1      | 5395673..5 DNA mismatch repair                   | orf19.4162  | 15970 | CaMLH1    | CELL CYC DNA binding                                                                                    |
| CA1230 | 1.0 | 2.2 | 2.2 | 1.3 | SSA4      | 5401884..5 cahsp70 mRNA for he                   | orf19.4980  | 11819 | CaSSA4    | CELL RES chaperone activity                                                                             |
| CA1231 | 1.8 | 1.3 | 0.9 | 1.1 | IPF11817  | complemer unknown function                       | orf19.4981  | 11817 | IPF11817  | TRANSPO:molecular_function unknown                                                                      |
| CA1232 | 1.8 | 1.0 | 1.0 | 0.8 | IPF11815  | complemer similar to Saccharomy                  | orf19.4982  | 11815 | IPF11815  | Lipid fatty-acid and isoprenoid metabolism                                                              |
| CA1233 | 0.9 | 1.0 | 0.9 | 1.3 | IPF11814  | complemer unknown function                       | orf19.4983  | 11814 | IPF11814  | No significant S.c. match                                                                               |
| CA1234 | 0.7 | 1.6 | 1.3 | 0.9 | IPF18732  | 5413276..5 histidine-rich glycoprot              | orf19.8330  | 18732 | IPF18732  | No significant S.c. match                                                                               |
| CA1235 | 0.6 | 1.1 | 0.8 | 0.9 | IPF20079  | complemer unknown function                       | orf19.8332  | 20079 | IPF20079  | UNCLASSI:molecular_function unknown                                                                     |
| CA1236 | 1.0 | 1.1 | 1.3 | 1.1 | YPT6      | 5418379..5 GTP-binding protein of                | orf19.8333  | 15785 | CaYPT6    | CELLULAF:hydrolase activity                                                                             |
| CA1237 | 1.7 | 1.5 | 1.5 | 1.0 | IPF15784  | complemer unknown function                       | orf19.8334  | 15784 | IPF15784  | No significant S.c. match                                                                               |
| CA1238 | 5.5 | 5.7 | 3.3 | 1.8 | IPF15781  | 5420640..5 unknown function                      | orf19.8335  | 15781 | IPF15781  | No significant S.c. match                                                                               |
| CA1239 | 0.9 | 0.7 | 0.6 | 0.9 | HSP60     | 5422161..5 Heat Shock Protein 60                 | orf19.717   | 14025 | CaHSP60   | PROTEIN I:chaperone activity                                                                            |
| CA1240 | 0.9 | 1.0 | 0.9 | 0.9 | IPF14026  | 5424324..5 similar to Saccharomy                 | orf19.8337  | 14026 | IPF14026  | TRANSCR transcription regulator activity                                                                |
| CA1241 | 0.9 | 1.0 | 0.8 | 0.9 | LIP8      | complemer Secretory lipase                       | orf19.8925  | 7914  | CaLIP8    | Other virulence attributes                                                                              |
| CA1242 | 0.9 | 1.0 | 1.2 | 1.0 | IPF19908  | 5452014..5 unknown function                      | orf19.1344  | 19908 | IPF19908  | No significant S.c. match                                                                               |
| CA1243 | 0.7 | 1.0 | 0.9 | 0.9 | IPF7922   | complemer unknown function                       | orf19.8923  | 7922  | IPF7922   | Amino acid transcription regulator activity                                                             |
| CA1244 | 1.3 | 1.0 | 0.9 | 0.8 | IPF12767  | 5465047..5 unknown function                      | orf19.2624  | 12767 | IPF12767  | No significant S.c. match                                                                               |
| CA1245 | 0.8 | 0.7 |     | 1.0 | IMH3.EXO1 | complemer IMP dehydrogenase, e                   | orf19.7689  | 3873  | CaIMH3.ex | Nucleotide oxidoreductase activity                                                                      |
| CA1246 | 1.9 | 1.3 | 0.8 | 1.4 | IMH3.EXO1 | complemer IMP dehydrogenase, e                   | orf19.19    | 3872  | CaIMH3.ex | Nucleotide metabolism Purine ribonucleotide metabolism                                                  |
| CA1247 | 1.2 | 1.4 | 1.0 | 1.3 | IPF3870   | complemer similar to Saccharomy                  | orf19.20    | 3870  | IPF3870   | CELL RES protein phosphatase activity                                                                   |
| CA1248 | 0.9 | 1.0 | 0.9 | 0.8 | IPF3866   | complemer unknown function                       | orf19.7692  | 3866  | IPF3866   | SUBCELLL:molecular_function unknown                                                                     |
| CA1249 | 1.1 | 0.9 | 0.9 | 1.1 | SPE4      | 5482001..5 spermine synthase (by                 | orf19.4960  | 9628  | CaSPE4    | Secondary transferase activity                                                                          |
| CA1250 | 1.0 | 0.8 | 0.9 | 1.1 | IPF9626   | 5483727..5 unknown function                      | orf19.12424 | 9626  | IPF9626   | No significant S.c. match                                                                               |
| CA1251 | 1.3 | 0.9 | 1.0 | 0.8 | IPF9624   | complemer similar to Saccharomy                  | orf19.12423 | 9624  | IPF9624   | CONTROL:molecular_function unknown                                                                      |
| CA1252 | 1.3 | 1.3 | 1.3 | 1.6 | RPN1      | 5489006..526S proteasome regul                   | orf19.12421 | 9623  | CaRPN1    | PROTEIN I:peptidase activity,signal transducer activity                                                 |
| CA1253 | 1.8 | 1.0 | 1.2 | 1.2 | FDH3.3F   | complemer formate dehydrogenas                   | orf19.1774  | 9034  | CaFDH3.3  | ENERGY                                                                                                  |
| CA1255 | 1.7 | 1.0 | 1.1 | 0.9 | IPF9030   | 5497238..5 unknown function                      | orf19.1776  | 9030  | IPF9030   | UNCLASSI:nucleotidyltransferase activity                                                                |
| CA1256 | 2.4 | 1.3 |     | 1.0 | UBP15     | complemer ubiquitin-specific prote               | orf19.1777  | 9029  | CaUBP15   | PROTEIN I:peptidase activity                                                                            |

|        |     |     |     |     |            |                                                   |               |       |            |                                                 |                                                          |                            |
|--------|-----|-----|-----|-----|------------|---------------------------------------------------|---------------|-------|------------|-------------------------------------------------|----------------------------------------------------------|----------------------------|
| CA1257 | 0.7 | 1.0 | 0.9 | 1.2 | IPF18725   | complemer unknown function                        | orf19.10678   | 18725 | IPF18725   | UNCLASSI                                        | molecular_function                                       | unknown                    |
| CA1258 | 1.0 | 1.1 | 1.0 | 0.9 | RPN8       | 5510003..526S proteasome regul                    | orf19.10677   | 18724 | CaRPN8     | PROTEIN f                                       | peptidase activity                                       |                            |
| CA1259 | 0.9 | 1.1 | 0.9 | 1.3 | IPF3174    | 5511244..5 Farnesyl transferase                   | (torf19.10676 | 3174  | IPF3174    | Lipid fatty-ε                                   | transferase activity                                     |                            |
| CA1260 | 1.0 | 0.7 | 0.8 | 0.9 | IPF3170    | 5512965..5 unknown function                       | orf19.3166    | 3170  | IPF3170    | UNCLASSI                                        | molecular_function                                       | unknown                    |
| CA1261 | 2.1 | 1.2 | 1.2 | 1.0 | IPF9887.3f | 5519470..5 unknown function, 3-pr                 | orf19.1240    | 9887  | IPF9887.3ε | UNCLASSI                                        | molecular_function                                       | unknown                    |
| CA1262 | 1.8 | 1.2 | 1.0 | 0.8 | MDR1       | 5527606..5 Mac1p interacting prot                 | orf19.1244    | 9881  | CaMDR1     | TRANSCR                                         | enzyme regulator activity                                |                            |
| CA1263 | 1.4 | 1.2 | 1.4 | 1.0 | IPF9880    | complemer unknown function                        | orf19.1246    | 9880  | IPF9880    | No significant                                  | S.c. match                                               |                            |
| CA1264 | 0.8 | 1.2 | 1.2 | 1.2 | STH1       | complemer helicase related protein                | orf19.239     | 10096 | CaSTH1     | CELL CYC                                        | DNA binding,helicase activity                            |                            |
| CA1265 | 0.9 | 1.0 | 0.8 | 0.9 | IPF10510   | 5542480..5 unknown function                       | orf19.240     | 10510 | IPF10510   | UNCLASSI                                        | molecular_function                                       | unknown                    |
| CA1266 | 1.2 | 0.9 | 0.8 | 0.7 | SAP8       | complemer aspartic protease                       | orf19.242     | 10508 | CaSAP8     | PROTEIN FATE [folding modification destination] | ""SUBCELLULAR LOCALISATION                               | Other virulence attributes |
| CA1267 | 0.7 | 0.9 | 0.8 | 1.0 | YSY6       | 5546802..5 protein involved in the secretory patl |               | 10503 | CaYSY6     | PROTEIN FATE [folding modification destination] | ""CELLULAR TRANSPORT AND TRANSPORT MECHANISMS            |                            |
| CA1268 | 1.1 | 1.2 | 0.9 | 1.2 | IPF14693   | complemer unknown function                        | orf19.3159    | 14693 | IPF14693   | UNCLASSI                                        | molecular_function                                       | unknown                    |
| CA1269 | 0.7 | 1.0 | 1.0 | 0.9 | IPF19726   | 5552779..5 unknown function                       | orf19.10667   | 19726 | IPF19726   | UNCLASSI                                        | molecular_function                                       | unknown                    |
| CA1270 | 0.7 | 1.1 | 0.9 | 0.9 | IPF13504   | 5558228..5 unknown function                       | orf19.10665   | 13504 | IPF13504   | No significant                                  | S.c. match                                               |                            |
| CA1271 | 1.5 | 1.1 | 1.0 | 0.9 | HIT1       | 5569225..5 required for growth at l               | orf19.2723    | 6402  | CaHIT1     | CELL RES                                        | molecular_function                                       | unknown                    |
| CA1272 | 1.7 | 1.3 | 1.0 | 1.0 | CGR1       | complemer Cell growth protein (by                 | orf19.2722    | 18718 | CaCGR1     | UNCLASSI                                        | molecular_function                                       | unknown                    |
| CA1273 | 0.8 | 0.9 | 1.0 | 0.9 | CCT4       | 5572601..5 Component of chaperon                  | orf19.2720    | 6406  | CaCCT4     | PROTEIN f                                       | chaperone activity                                       |                            |
| CA1274 | 0.7 | 0.8 | 1.0 | 1.0 | SAS10      | complemer Involved in silencing (b                | orf19.2717    | 6410  | CaSAS10    | TRANSCR                                         | RNA binding                                              |                            |
| CA1275 | 0.6 | 1.0 | 0.9 | 1.1 | RPC53      | 5576302..5 DNA-directed RNA pol                   | orf19.2715    | 19910 | CaRPC53    | TRANSCR                                         | nucleotidyltransferase activity                          |                            |
| CA1277 | 1.0 | 1.2 | 1.2 | 1.2 | IPF10837   | 5581353..5 unknown function                       | orf19.3630    | 10837 | IPF10837   | TRANSCR                                         | transferase activity                                     |                            |
| CA1278 | 1.4 | 0.7 | 1.0 | 1.2 | IPF10835   | 5584841..5 unknown function                       | orf19.3629    | 10835 | IPF10835   | UNCLASSI                                        | molecular_function                                       | unknown                    |
| CA1279 | 1.4 | 1.4 | 1.2 | 1.0 | RSP5       | 5588206..5 ubiquitin-protein ligase               | orf19.3628    | 10833 | CaRSP5     | PROTEIN f                                       | ligase activity                                          |                            |
| CA1280 | 1.2 | 1.0 | 1.1 | 1.1 | IPF10828   | 5591405..5 unknown function                       | orf19.3627    | 10828 | IPF10828   | UNCLASSIFIED                                    | PROTEINS                                                 |                            |
| CA1281 | 1.0 | 1.0 | 1.1 | 0.9 | IPF10171.f | complemer unknown function, exo                   | orf19.645     | 10174 | IPF10171.ε | C-compound and carbohydrate metabolism          | CELLULAR TRANSPORT AND TRANSPORT MECHANISMS              | SUBCELLULAR LOI            |
| CA1282 | 0.9 | 1.0 | 1.1 | 1.1 | IPF10171.f | complemer unknown function, exon 2                |               | 10173 | IPF10171.ε | C-compound and carbohydrate metabolism          | CONTROL OF CELLULAR ORGANIZATION                         | TRANSPORT FACILITATION     |
| CA1283 | 1.0 | 0.7 | 1.1 | 0.8 | IPF10171.f | complemer unknown function, exo                   | orf19.644     | 10171 | IPF10171.ε | C-compound and carbohydrate metabolism          | CELLULAR TRANSPORT AND TRANSPORT MECHANISMS              | REGULATION OF/II           |
| CA1284 | 1.0 | 0.9 | 0.6 | 1.1 | IPF10168.ε | 5603150..5 unknown function, 3-pr                 | orf19.8257    | 10168 | IPF10168.ε | CELL CYC                                        | molecular_function                                       | unknown                    |
| CA1285 | 0.5 | 0.9 | 1.0 | 0.9 | SKP1       | 5610067..5 kinetochore protein cor                | orf19.11905   | 5549  | CaSKP1     | Amino acid                                      | protein binding                                          |                            |
| CA1286 | 1.0 | 1.0 | 1.1 | 1.1 | IPF5546    | 5611387..5 unknown function                       | orf19.11906   | 5546  | IPF5546    | CELL CYCLE AND DNA PROCESSING                   | TRANSCRIPTION                                            | SUBCELLULAR LOCALISATION   |
| CA1287 | 1.2 | 1.1 | 1.1 | 0.9 | IPF5545    | complemer unknown function                        | orf19.4430    | 5545  | IPF5545    | PROTEIN f                                       | molecular_function                                       | unknown                    |
| CA1288 | 2.0 | 2.1 | 2.2 | 0.9 | KSP1       | 5616957..5 SERINE/THREONINE                       | orf19.4432    | 5540  | CaKSP1     | SUBCELLL                                        | protein kinase activity                                  |                            |
| CA1289 | 0.6 | 0.7 | 0.9 | 0.8 | ZUO1       | 5623854..5 Zootin, a putative Z-D                 | orf19.10224   | 16213 | CaZUO1     | SUBCELLL                                        | chaperone activity                                       |                            |
| CA1290 | 1.0 | 0.9 | 1.0 | 1.0 | IPF16212   | complemer unknown function                        | orf19.2710    | 16212 | IPF16212   | C-compour                                       | enzyme regulator activity                                |                            |
| CA1291 | 1.1 | 1.1 | 0.8 | 1.0 | IPF16752   | complemer unknown function                        | orf19.2711    | 16752 | IPF16752   | TRANSCR                                         | transcription regulator activity                         |                            |
| CA1292 | 0.8 | 0.9 | 0.9 | 1.0 | SRB2.3     | 5629009..5 DNA-directed RNA polymerase II ho      |               | 6419  | CaSRB2.3   | TRANSCR                                         | transcription regulator activity                         |                            |
| CA1293 | 1.0 | 1.4 | 1.0 | 1.0 | HCA4       | 5630031..5 Can suppress the U14                   | orf19.2712    | 6418  | CaHCA4     | TRANSCR                                         | RNA binding,helicase activity                            |                            |
| CA1294 | 0.9 | 0.9 | 1.1 | 0.9 | MSH5.3F    | complemer Meiosis-specific protei                 | orf19.10228   | 6415  | CaMSH5.3   | CELL CYC                                        | molecular_function                                       | unknown                    |
| CA1296 | 1.3 | 1.2 | 1.0 | 1.0 | IPF18712   | 5635451..5 unknown function                       |               | 18712 | IPF18712   | UNCLASSIFIED                                    | PROTEINS                                                 |                            |
| CA1297 | 0.9 | 0.9 | 0.9 | 0.9 | ACF2       | 5637459..5 endo-1,3-beta-glucana                  | orf19.3417    | 14734 | CaACF2     | PROTEIN f                                       | hydrolase activity                                       |                            |
| CA1298 | 0.4 | 0.4 | 0.9 | 1.0 | RPL32      | 5640699..5 ribosomal protein L32                  |               | 12449 | CaRPL32    | PROTEIN f                                       | structural molecule activity                             |                            |
| CA1299 | 1.5 | 1.2 | 1.1 | 0.8 | PTK2       | complemer serine /threonine prote                 | orf19.3415    | 12448 | CaPTK2     | CELLULAF                                        | protein kinase activity                                  |                            |
| CA1300 | 1.4 | 0.9 | 1.0 | 0.9 | SLY41      | 5650076..5 vesicular transport (by                | orf19.4199    | 12346 | CaSLY41    | CELLULAF                                        | molecular_function                                       | unknown                    |
| CA1301 | 0.9 | 1.0 | 1.2 | 1.0 | YHM2       | complemer mtDNA stabilizing prot                  | orf19.4197    | 12348 | CaYHM2     | CELL CYC                                        | transporter activity                                     |                            |
| CA1302 | 0.5 | 1.1 | 0.9 | 0.9 | FCA1.3     | 5654565..5 cytosine deaminase, 3-prime end        |               | 13513 | CaFCA1.3   | Nucleotide                                      | hydrolase activity                                       |                            |
| CA1303 | 0.8 | 1.2 | 1.0 | 1.1 | TFB4       | complemer component of RNA pol                    | orf19.4194    | 13511 | CaTFB4     | CELL CYC                                        | transcription regulator activity                         |                            |
| CA1304 | 0.2 | 0.4 | 0.5 | 0.9 | RPS13.3    | complemer ribosomal protein, 3-prime end (by h    |               | 13509 | CaRPS13.ε  | PROTEIN f                                       | structural molecule activity                             |                            |
| CA1305 | 0.9 | 0.9 | 0.8 | 1.0 | IPF13508   | complemer unknown function                        | orf19.4193    | 13508 | IPF13508   | UNCLASSI                                        | molecular_function                                       | unknown                    |
| CA1306 | 0.7 | 1.0 | 0.9 | 0.9 | CDC14.3    | 5659135..5 protein phosphatase, 3orf              | orf19.4192    | 13507 | CaCDC14.ε  | CELL CYC                                        | protein phosphatase activity                             |                            |
| CA1307 | 0.8 | 1.0 | 0.9 | 1.1 | IPF13506.ε | complemer unknown function, 3-prime end           |               | 13506 | IPF13506.ε | No significant                                  | S.c. match                                               |                            |
| CA1308 | 0.9 | 1.0 | 1.2 | 1.0 | IPF8642    | 5663134..5 unknown function                       | orf19.11450   | 8642  | IPF8642    | UNCLASSIFIED                                    | PROTEINS                                                 |                            |
| CA1309 | 1.4 | 0.9 | 1.0 | 0.9 | IPF8627    | 5671739..5 unknown function                       | orf19.11452   | 8627  | IPF8627    | TRANSCRIPTION                                   | SUBCELLULAR LOCALISATION                                 |                            |
| CA1310 | 0.9 | 1.0 | 1.1 | 1.0 | IPF14232   | 5675956..5 unknown function                       | orf19.11114   | 14232 | IPF14232   | No significant                                  | S.c. match                                               |                            |
| CA1311 | 0.7 | 1.1 | 1.0 | 0.8 | IPF14233   | 5678043..5 Putative transthyretin p               | orf19.3633    | 14233 | IPF14233   | UNCLASSIFIED                                    | PROTEINS                                                 |                            |
| CA1312 | 1.0 | 1.0 | 1.0 | 1.1 | IPF14241   | complemer unknown function                        | orf19.11117   | 14241 | IPF14241   | No significant                                  | S.c. match                                               |                            |
| CA1313 | 0.8 | 0.8 | 0.9 | 1.1 | IPF14126   | 5686766..5 unknown function                       | orf19.3638    | 14126 | IPF14126   | No significant                                  | S.c. match                                               |                            |
| CA1314 | 0.7 | 0.9 | 1.1 | 1.0 | MAG1       | complemer 3-methyladenine DNA                     | orf19.3639    | 14127 | CaMAG1     | CELL CYC                                        | DNA binding                                              |                            |
| CA1315 | 2.4 | 1.1 | 0.8 | 1.3 | URA2.5EO   | complemer multifunctional pyrimidi                | orf19.9896    | 10801 | CaURA2.5ε  | Nucleotide                                      | transferase activity                                     |                            |
| CA1316 | 1.4 | 0.8 | 1.3 | 1.0 | IPF14587.ε | 5701736..5 unknown function, 3-prime end          |               | 14587 | IPF14587.ε | No significant                                  | S.c. match                                               |                            |
| CA1318 | 1.2 | 0.9 | 0.9 | 0.9 | IPF3147    | complemer Nuclear valosin-contain                 | orf19.4219    | 3147  | IPF3147    | CLASSIFI                                        | Chelicase activity                                       |                            |
| CA1319 | 0.4 | 0.6 | 0.9 | 1.0 | IPF3144    | complemer unknown function                        | orf19.4220    | 3144  | IPF3144    | UNCLASSI                                        | molecular_function                                       | unknown                    |
| CA1320 | 1.3 | 1.0 | 1.0 | 0.9 | IPF3143    | complemer similar to Saccharomy                   | orf19.4221    | 3143  | IPF3143    | CELL CYC                                        | DNA binding                                              |                            |
| CA1321 | 0.8 | 0.9 | 0.9 | 1.0 | IPF3141    | 5715614..5 similar to Saccharomy                  | orf19.4222    | 3141  | IPF3141    | PROTEIN f                                       | enzyme regulator activity                                |                            |
| CA1322 | 0.7 | 0.6 | 0.8 | 1.0 | GCD11      | complemer Translation initiation fa               | orf19.4223    | 3140  | CaGCD11    | TRANSCR                                         | translation regulator activity                           |                            |
| CA1323 | 0.8 | 0.9 | 1.1 | 1.1 | IPF6675    | complemer unknown function                        | orf19.1309    | 6675  | IPF6675    | No significant                                  | S.c. match                                               |                            |
| CA1324 | 0.9 | 0.9 | 0.9 | 1.0 | IPF6676    | 5723687..5 polytopic membrane pr                  | orf19.1308    | 6676  | IPF6676    | CELL RES                                        | molecular_function                                       | unknown                    |
| CA1325 | 1.0 | 0.9 | 1.0 | 1.1 | IPF6678    | complemer unknown function                        | orf19.1307    | 6678  | IPF6678    | UNCLASSIFIED                                    | PROTEINS                                                 |                            |
| CA1326 | 1.0 | 0.9 | 0.9 | 0.9 | IPF6679    | complemer unknown function                        | orf19.1306    | 6679  | IPF6679    | No significant                                  | S.c. match                                               |                            |
| CA1327 | 0.7 | 0.9 | 0.8 | 1.2 | IPF6680    | complemer unknown function                        | orf19.1305    | 6680  | IPF6680    | UNCLASSI                                        | transferase activity                                     |                            |
| CA1328 | 0.9 | 0.9 | 0.9 | 0.9 | RRP4       | 5730636..53 ->5 exoribonuclease                   | orf19.1304    | 6682  | CaRRP4     | No significant                                  | S.c. match                                               |                            |
| CA1329 | 0.9 | 1.4 | 1.1 | 1.3 | MRF2       | complemer peptide chain release f                 | orf19.1303    | 19626 | CaMRF2     | PROTEIN f                                       | translation regulator activity                           |                            |
| CA1330 | 2.3 | 0.9 | 7.2 | 1.0 | IPF11713   | 5738047..5 unknown function                       | orf19.8744    | 11713 | IPF11713   | Lipid fatty-acid and isoprenoid metabolism      | ""Metabolism of vitamins cofactors and prosthetic groups | ""PROTEIN FATE [foldi      |

|        |     |     |     |     |            |                                                |             |       |            |                                                                                                            |
|--------|-----|-----|-----|-----|------------|------------------------------------------------|-------------|-------|------------|------------------------------------------------------------------------------------------------------------|
| CA1331 | 1.3 | 1.1 | 1.6 | 1.0 | IPF11714   | complemer unknown function                     | orf19.1150  | 11714 | IPF11714   | No significant S.c. match                                                                                  |
| CA1332 | 1.3 | 1.0 | 1.4 | 1.0 | IPF11716   | 5740711..5 unknown function                    | orf19.1150  | 11716 | IPF11716   | Nitrogen and sulphur metabolism TRANSCRIPTION SUBCELLULAR LOCALISATION                                     |
| CA1333 | 0.7 | 0.6 | 0.9 | 1.1 | MRF1       | complemer mitochondrial respirato              | orf19.8742  | 11717 | CaMRF1     | TRANSCRIPTION SUBCELLULAR LOCALISATION                                                                     |
| CA1334 | 0.9 | 1.0 |     | 1.0 | IPF19912   | complemer unknown function                     | orf19.8740  | 19912 | IPF19912   | CELL RESCUE DEFENSE AND VIRULENCE ""CELL FATE                                                              |
| CA1335 | 1.5 | 0.9 | 1.1 | 0.9 | TRA1       | 5749821..5 phosphatidylinositol kir            | orf19.3451  | 5342  | CaTRA1     | TRANSCR transferase activity                                                                               |
| CA1336 | 1.0 | 1.0 | 1.2 | 0.9 | IPF5334.E  | complemer unknown function, exon 2             |             | 5335  | IPF5334.ex | UNCLASSI molecular_function unknown                                                                        |
| CA1338 | 1.1 | 1.0 | 0.9 | 0.8 | IPF5333    | 5758841..5 unknown function                    | orf19.10953 | 5333  | IPF5333    | UNCLASSI molecular_function unknown                                                                        |
| CA1339 | 1.9 | 1.0 | 1.5 | 1.0 | IPF5330    | 5762965..5 unknown function                    | orf19.10952 | 5330  | IPF5330    | No significant S.c. match                                                                                  |
| CA1340 | 0.7 | 0.7 | 1.0 | 1.0 | VPS4       | 5770457..5 vacuolar sorting protein            | orf19.4339  | 11343 | CaVPS4     | PROTEIN hydrolase activity                                                                                 |
| CA1341 | 0.9 | 0.8 | 0.8 | 0.9 | IPF11344   | complemer unknown function                     | orf19.4340  | 11344 | IPF11344   | CELLULAR TRANSPORT AND TRANSPORT MECHANISMS REGULATION OF/INTERACTION WITH CELLULAR ENVIRON                |
| CA1342 | 1.3 | 0.9 | 1.0 | 0.8 | IPF11347   | complemer unknown function                     |             | 11347 | IPF11347   | No significant S.c. match                                                                                  |
| CA1343 | 0.9 | 0.8 | 1.0 | 1.0 | IPF14624   | 5779872..5 unknown function                    |             | 14624 | IPF14624   | No significant S.c. match                                                                                  |
| CA1344 | 0.9 | 0.9 | 0.7 | 0.9 | IPF14623   | 5780307..5 unknown function                    | orf19.4342  | 14623 | IPF14623   | CELLULAR transcription regulator activity                                                                  |
| CA1345 | 1.8 | 1.1 | 1.0 | 1.2 | IPF6003    | 5788850..5 similar to Saccharomyc              | orf19.1490  | 6003  | IPF6003    | CELL FATI signal transducer activity                                                                       |
| CA1346 | 0.7 | 0.9 | 1.2 | 0.9 | KRE2.3F    | complemer secretory pathway protein, 3-prime e |             | 18700 | CaKRE2.3f  | No significant S.c. match                                                                                  |
| CA1349 | 1.2 | 1.3 | 1.3 | 1.1 | PRP12      | 5804530..5 involved in early matur             | orf19.4351  | 12922 | CaPRP12    | TRANSCR hydrolase activity                                                                                 |
| CA1350 | 0.7 | 1.0 | 0.8 | 0.9 | MCM2       | complemer replication licensing fac            | orf19.4354  | 15306 | CaMCM2     | CELL CYC DNA binding                                                                                       |
| CA1351 | 1.2 | 1.0 | 0.9 | 0.8 | PCL2       | complemer G1/S specific cyclin                 | orf19.403   | 8834  | CaPCL2     | CELL CYC protein kinase activity,enzyme regulator activity                                                 |
| CA1352 | 0.8 | 0.8 | 0.9 | 0.8 | VCX1       | complemer Ca2+-transport by hor                | orf19.405   | 16576 | CaVCX1     | CELLULAR transporter activity                                                                              |
| CA1353 | 1.1 | 0.6 | 1.0 | 0.9 | ERG1       | complemer squalene epoxidase                   | orf19.406   | 19729 | CaERG1     | Lipid fatty-ε oxidoreductase activity                                                                      |
| CA1354 | 0.9 | 0.9 | 1.0 | 1.3 | GCD6       | complemer translation initiation fac           | orf19.407   | 10142 | CaGCD6     | PROTEIN t translation regulator activity                                                                   |
| CA1355 | 1.0 | 0.9 | 0.9 | 0.9 | IPF10138.ε | complemer unknown function, 3-pr               | orf19.408   | 10140 | IPF10138.ε | No significant S.c. match                                                                                  |
| CA1356 | 0.8 | 1.0 | 1.1 | 1.0 | IPF10138.ε | complemer unknown function, 5-pr               | orf19.409   | 10138 | IPF10138.ε | UNCLASSI molecular_function unknown                                                                        |
| CA1357 | 1.3 | 1.1 | 1.1 | 1.0 | ARH1       | 5829588..5 adrenodoxin reductase               | orf19.410   | 10134 | CaARH1     | Lipid fatty-ε transporter activity                                                                         |
| CA1358 | 0.8 | 0.9 | 1.3 | 0.9 | NIF3       | complemer Ngg1p-interacting fact               | orf19.4406  | 11837 | CaNIF3     | TRANSCR molecular_function unknown                                                                         |
| CA1359 | 0.9 | 1.0 | 1.1 | 1.0 | IPF11842   | complemer unknown function                     | orf19.4405  | 11842 | IPF11842   | CELL CYCLE AND DNA PROCESSING                                                                              |
| CA1360 | 0.7 | 1.1 | 1.4 | 0.9 | IPF14598   | 5844203..5 unknown function                    | orf19.4404  | 14598 | IPF14598   | No significant S.c. match                                                                                  |
| CA1361 | 1.4 | 1.0 | 1.0 | 0.7 | PEP5       | 5846748..5 vacuolar biogenesis pr              | orf19.4403  | 11853 | CaPEP5     | PROTEIN t molecular_function unknown                                                                       |
| CA1362 | 1.1 | 1.1 | 1.1 | 0.9 | PEX3       | complemer PEROXISOMAL MEMI                     | orf19.4426  | 5552  | CaPEX3     | CELLULAR molecular_function unknown                                                                        |
| CA1363 | 0.7 | 0.7 | 0.9 | 0.9 | IPF5556    | 5857554..5 acid phosphatase (by t              | orf19.4424  | 5556  | IPF5556    | No significant S.c. match                                                                                  |
| CA1364 | 1.0 | 1.0 | 1.0 | 0.8 | IPF5561    | 5859512..5 unknown function                    | orf19.4423  | 5561  | IPF5561    | UNCLASSIFIED PROTEINS                                                                                      |
| CA1365 | 1.1 | 1.2 | 1.1 | 0.9 | IPF11849   | 5867837..5 unknown function                    | orf19.4459  | 11849 | IPF11849   | UNCLASSIFIED PROTEINS                                                                                      |
| CA1366 | 0.8 | 1.1 | 1.0 | 1.2 | IPF11847   | 5871971..5 unknown function                    | orf19.4457  | 11847 | IPF11847   | PROTEIN t protein binding                                                                                  |
| CA1367 | 0.8 | 1.0 | 0.8 | 1.0 | IPF16755   | 5882980..5 unknown function                    | orf19.4966  | 16755 | IPF16755   | C-compour transporter activity                                                                             |
| CA1368 | 1.0 | 0.8 | 1.1 | 1.0 | IPF15969   | complemer unknown function                     | orf19.4965  | 15969 | IPF15969   | No significant S.c. match                                                                                  |
| CA1369 | 1.0 | 1.1 | 0.9 | 0.8 | IPF15968   | complemer unknown function                     | orf19.4964  | 15968 | IPF15968   | UNCLASSI molecular_function unknown                                                                        |
| CA1370 | 0.5 | 1.1 | 0.9 | 1.0 | TC11       | complemer protein phosphatase T                | orf19.4963  | 15966 | CaTC11     | UNCLASSI molecular_function unknown                                                                        |
| CA1371 | 0.5 | 0.8 | 0.9 | 0.9 | IPF19731   | 5890450..5 unknown function                    | orf19.4962  | 19731 | IPF19731   | UNCLASSI molecular_function unknown                                                                        |
| CA1372 | 1.2 | 1.0 | 1.1 | 1.1 | IPF15844   | complemer similar to Saccharomyc               | orf19.4961  | 15844 | IPF15844   | TRANSCR transcription regulator activity                                                                   |
| CA1373 | 1.0 | 2.7 | 2.2 | 1.1 | AGP1       | complemer asparagine and glutam                | orf19.8784  | 7152  | CaAGP1     | Amino acid transporter activity                                                                            |
| CA1374 | 1.4 | 1.0 | 1.0 | 0.8 | MIP1       | complemer Mitochondrial intermed               | orf19.1195  | 7154  | CaMIP1     | PROTEIN t peptidase activity                                                                               |
| CA1375 | 1.0 | 1.0 | 1.2 | 1.1 | IPF7158    | 5903699..5 putative serine/threoni             | orf19.8787  | 7158  | IPF7158    | CLASSIFIC protein kinase activity                                                                          |
| CA1376 | 1.2 | 1.0 | 1.0 | 0.8 | IPF7159    | complemer unknown function                     | orf19.8789  | 7159  | IPF7159    | UNCLASSI molecular_function unknown                                                                        |
| CA1377 | 1.7 | 1.5 | 1.2 | 1.1 | IPF18690   | complemer unknown function                     | orf19.461   | 18690 | IPF18690   | No significant S.c. match                                                                                  |
| CA1378 | 0.8 | 1.0 | 1.1 | 1.2 | ERK2       | 5912192..5 mitogen-activated prot              | orf19.460   | 2568  | CaERK2     | CELL CYCLE AND DNA PROCESSING REGULATION OF/INTERACTION WITH CELLULAR ENVIRONMENT CELL FATE SL             |
| CA1380 | 0.9 | 1.1 | 1.1 | 1.0 | BCS1       | complemer mitochondrial protein o              | orf19.458   | 2574  | CaBCS1     | PROTEIN t hydrolase activity                                                                               |
| CA1381 | 1.0 | 0.9 | 1.2 | 0.8 | IPF8420    | complemer unknown function                     | orf19.929   | 8420  | IPF8420    | CELL RESCUE DEFENSE AND VIRULENCE ""TRANSPORT FACILITATION                                                 |
| CA1382 | 0.9 | 0.9 | 0.9 | 1.0 | IPF8421    | complemer unknown function                     | orf19.928   | 8421  | IPF8421    | No significant S.c. match                                                                                  |
| CA1383 | 1.0 | 0.9 | 0.7 | 1.0 | IPF8422    | 5926369..5 unknown function                    | orf19.927   | 8422  | IPF8422    | UNCLASSI molecular_function unknown                                                                        |
| CA1384 | 0.8 | 0.9 | 1.2 | 1.2 | IPF8423    | complemer similar to Saccharomyc               | orf19.926   | 8423  | IPF8423    | Nucleotide hydrolase activity,DNA binding                                                                  |
| CA1385 | 1.4 | 1.0 | 1.2 | 1.1 | IPF8424    | complemer unknown function                     | orf19.925   | 8424  | IPF8424    | TRANSCRIPTION                                                                                              |
| CA1386 | 0.8 | 1.0 | 1.3 | 1.0 | THR1       | complemer homoserine kinase                    | orf19.923   | 8426  | CaTHR1     | Amino acid transferase activity                                                                            |
| CA1387 | 0.7 |     |     | 1.0 | ERG16      | complemer cytochrome P450 lano                 | orf19.922   | 8427  | CaERG16    | Lipid fatty-ε oxidoreductase activity                                                                      |
| CA1388 | 1.1 | 0.9 |     | 1.2 | IPF16514   | complemer unknown function                     | orf19.921   | 16514 | IPF16514   | No significant S.c. match                                                                                  |
| CA1389 | 1.2 | 1.0 | 1.2 | 0.9 | PLP2       | 5939493..5 Might regulate Ste4p ir             | orf19.9338  | 17476 | CaPLP2     | CELL FATI enzyme regulator activity                                                                        |
| CA1390 | 0.8 | 0.9 | 1.2 | 1.1 | IPF17474   | 5940747..5 unknown function                    | orf19.1768  | 17474 | IPF17474   | CELL CYCLE AND DNA PROCESSING ""PROTEIN FATE [folding modification destination] ""SUBCELLULAR LOCALISATION |
| CA1391 | 1.4 | 1.0 | 0.9 | 0.9 | IPF6151    | 5942778..5 unknown function                    |             | 6151  | IPF6151    | CELL CYCLE AND DNA PROCESSING SUBCELLULAR LOCALISATION                                                     |
| CA1392 | 1.5 | 1.2 | 1.1 | 1.0 | IPF6149    | 5944903..5 similar to Saccharomyc              | orf19.1767  | 6149  | IPF6149    | PROTEIN t peptidase activity                                                                               |
| CA1393 | 0.9 | 1.0 | 1.1 | 1.0 | IFO3       | 5948144..5 Similar to Streptomyce              | orf19.1766  | 6146  | CaIFO3     | CELL FATE                                                                                                  |
| CA1394 | 1.1 | 1.0 | 1.1 | 1.3 | IFO2       | 5952440..5 unknown function                    | orf19.9334  | 19560 | CaIFO2     | UNCLASSIFIED PROTEINS                                                                                      |
| CA1395 | 0.9 | 1.0 |     | 1.0 | IPF17558   | 5956966..5 unknown function                    | orf19.9332  | 17558 | IPF17558   | SUBCELLULAR LOCALISATION                                                                                   |
| CA1396 | 0.8 | 1.1 | 0.9 | 1.0 | IPF8075    | 5961207..5 unknown function                    | orf19.3701  | 8075  | IPF8075    | UNCLASSI molecular_function unknown                                                                        |
| CA1397 | 1.6 | 1.1 | 1.1 | 0.6 | TOM72      | 5963697..5 mitochondrial import re             | orf19.3700  | 8073  | CaTOM72    | PROTEIN t transporter activity                                                                             |
| CA1398 | 1.1 | 1.0 |     | 1.0 | IPF19913   | 5965945..5 unknown function                    | orf19.3699  | 19913 | IPF19913   | CELLULAR hydrolase activity                                                                                |
| CA1399 | 0.8 | 0.9 |     | 1.2 | IPF8069    | complemer unknown function                     | orf19.3698  | 8069  | IPF8069    | UNCLASSI molecular_function unknown                                                                        |
| CA1400 | 1.3 | 0.9 | 0.9 | 0.9 | IPF8067    | 5968669..5 unknown function                    | orf19.3697  | 8067  | IPF8067    | UNCLASSI molecular_function unknown                                                                        |
| CA1401 | 0.8 | 1.1 | 1.0 | 1.0 | TOM22      | 5971836..5 mitochondrial outer me              | orf19.3696  | 8066  | CaTOM22    | PROTEIN t transporter activity                                                                             |
| CA1402 | 0.1 | 0.1 | 0.0 | 0.1 | ECE1       | 5996321..5 Cell Elongation Protein             | orf19.3374  | 14152 | CaECE1     | Hypa-specific No significant S.c. match                                                                    |
| CA1403 | 0.4 | 0.6 | 0.9 | 1.2 | IPF14155   | 5997783..5 similar to Saccharomyc              | orf19.3373  | 14155 | IPF14155   | CELL CYC RNA binding                                                                                       |
| CA1404 | 0.9 | 1.0 | 1.0 | 0.9 | IPF19554.ε | 5999907..6 unknown function, 5-pr              | orf19.3372  | 19554 | IPF19554.ε | UNCLASSI peptidase activity                                                                                |
| CA1405 | 0.9 | 0.9 | 1.3 | 1.1 | IPF19554.ε | 6000571..6 unknown function, 3-pr              | orf19.3371  | 15627 | IPF19554.ε | No significant S.c. match                                                                                  |

|        |     |     |     |     |            |                                                |                  |                                                                                             |
|--------|-----|-----|-----|-----|------------|------------------------------------------------|------------------|---------------------------------------------------------------------------------------------|
| CA1406 | 1.1 | 1.2 | 1.2 | 0.9 | DOT4       | 6002515..6derepression of telome orf19.3370    | 15624 CaDOT4     | TRANSCR peptidase activity                                                                  |
| CA1407 | 1.3 | 1.3 | 1.2 | 1.4 | UAPC       | 6017274..6purine permease (by h orf19.2882     | 10516 CaUAPC     | No significant S.c. match                                                                   |
| CA1408 | 0.8 | 1.0 | 1.2 | 1.0 | IPF10513   | 6020500..6unknown function orf19.2883          | 10513 IPF10513   | No significant S.c. match                                                                   |
| CA1409 | 1.1 | 0.8 | 0.8 | 1.0 | SPT16      | complemer general chromatin fact orf19.2884    | 10512 CaSPT16    | CELL CYC transcription regulator activity                                                   |
| CA1410 | 1.1 | 0.9 | 1.0 | 1.0 | GAT1       | 6031344..6nitrogen regulation (by orf19.1275   | 12290 CaGAT1     | Nitrogen ar transcription regulator activity                                                |
| CA1411 | 1.3 | 1.4 | 1.1 | 1.0 | IPF11858   | complemer unknown function orf19.1277          | 11858 IPF11858   | No significant S.c. match                                                                   |
| CA1412 | 1.5 | 1.0 | 0.9 | 0.9 | IPF11854   | complemer unknown function orf19.1278          | 11854 IPF11854   | No significant S.c. match                                                                   |
| CA1413 | 0.7 | 1.0 | 1.0 | 1.1 | MTR3       | 6040777..6Involved in mRNA tran orf19.168      | 16693 CaMTR3     | TRANSCR RNA binding                                                                         |
| CA1414 | 2.6 | 1.2 | 1.2 | 1.3 | CHO2       | complemer phosphatidylethanolam orf19.169      | 19594 CaCHO2     | Lipid fatty-εtransferase activity                                                           |
| CA1415 | 1.3 | 1.1 | 1.0 | 0.9 | DBP2.EXO   | complemer ATP-dependent RNA f orf19.170        | 18681 CaDBP2.e   | TRANSCRIPTION SUBCELLULAR LOCALISATION                                                      |
| CA1416 | 1.6 | 1.0 | 0.7 | 1.4 | DBP2.EXO   | complemer ATP-dependent RNA f orf19.171        | 17362 CaDBP2.e   | TRANSCR RNA binding,helicase activity                                                       |
| CA1417 | 1.2 | 1.1 | 1.1 | 1.1 | IPF16126   | complemer similar to Saccharomy orf19.172      | 16126 IPF16126   | TRANSCR nucleotidyltransferase activity                                                     |
| CA1418 | 1.1 | 1.2 | 1.2 | 0.8 | IPF16124   | complemer zinc-finger containing r orf19.173   | 16124 IPF16124   | TRANSCR DNA binding                                                                         |
| CA1419 | 1.2 | 0.9 |     | 1.1 | IPF17296   | complemer unknown function orf19.175           | 17296 IPF17296   | CELL CYCLE AND DNA PROCESSING SUBCELLULAR LOCALISATION                                      |
| CA1420 | 0.4 | 1.0 | 1.1 | 0.9 | RNT1       | complemer Ribonuclease III (by hc orf19.11277  | 14250 CaRNT1     | TRANSCR RNA binding                                                                         |
| CA1421 | 0.4 | 0.9 | 1.0 | 1.0 | MRPL11     | 6063038..6Mitochondrial ribosom: orf19.11278   | 14249 CaMRPL11   | PROTEIN †structural molecule activity                                                       |
| CA1422 | 0.8 | 1.2 | 1.1 | 1.3 | IPF14248   | 6064228..6putative methyltransfer orf19.3798   | 14248 IPF14248   | UNCLASSI protein binding                                                                    |
| CA1423 | 0.4 | 0.6 | 0.4 | 1.1 | IPF14247   | complemer unknown function orf19.3799          | 14247 IPF14247   | SUBCELLL molecular_function unknown                                                         |
| CA1424 | 1.2 | 1.0 | 1.0 | 0.8 | IPF9090    | complemer unknown function orf19.11282         | 9090 IPF9090     | No significant S.c. match                                                                   |
| CA1426 | 1.2 | 1.0 | 1.0 | 1.0 | ALS11.3F   | 6081393..6agglutinin-like protein, orf19.13168 | 9917 CaALS11.3   | SUBCELLULAR LOCALISATION Other virulence attributes                                         |
| CA1427 | 1.1 | 0.9 |     | 1.0 | IPF9914    | 6084925..6alanyl-tRNA synthetasi orf19.5746    | 9914 IPF9914     | PROTEIN †ligase activity                                                                    |
| CA1428 | 0.9 | 1.1 | 1.0 | 0.9 | MRP4       | complemer Ribosomal protein of t orf19.13170   | 15124 CaMRP4     | PROTEIN †RNA binding,structural molecule activity                                           |
| CA1429 | 1.3 | 1.0 | 0.9 | 0.9 | IPF15123   | 6089555..6unknown function orf19.13171         | 15123 IPF15123   | No significant S.c. match                                                                   |
| CA1430 | 0.9 | 0.7 | 1.2 | 1.0 | IPF14331   | 6096149..6Probable extracellular r orf19.3380  | 14331 IPF14331   | No significant S.c. match                                                                   |
| CA1431 | 0.4 | 0.2 | 0.3 | 0.8 | FET34.3EC  | 6109997..6iron transport multicop orf19.1206   | 12467 CaFET34.3  | CELLULAR TRANSPORT AND TRANSPORT MECHANISMS REGULATION OF/INTERACTION WITH CELLULAR ENVIRON |
| CA1432 | 0.7 | 0.8 | 1.0 | 0.9 | APM3       | 6111900..6AP-3 complex subunit, orf19.1204     | 12465 CaAPM3     | CELLULAF molecular_function unknown                                                         |
| CA1433 | 0.7 | 0.8 | 1.0 | 0.9 | IPF12464   | complemer unknown function orf19.1203          | 12464 IPF12464   | No significant S.c. match                                                                   |
| CA1434 | 1.3 | 0.9 | 0.9 | 0.9 | SNI2       | 6114195..6Sec9 interacting protei orf19.1203   | 12463 CaSNI2     | CELLULAF molecular_function unknown                                                         |
| CA1435 | 0.9 | 1.0 | 1.1 | 1.1 | IPF7166    | 6117655..6unknown function orf19.1202          | 7166 IPF7166     | CELLULAR TRANSPORT AND TRANSPORT MECHANISMS SUBCELLULAR LOCALISATION                        |
| CA1436 | 1.2 | 1.0 | 1.0 | 1.0 | IPF7165    | complemer similar to Saccharomy orf19.1201     | 7165 IPF7165     | PROTEIN †ligase activity                                                                    |
| CA1437 | 0.9 | 1.1 | 1.0 | 1.2 | IPF7163    | 6120582..6unknown function orf19.1200          | 7163 IPF7163     | No significant S.c. match                                                                   |
| CA1438 | 1.1 | 1.4 | 1.0 | 1.2 | NOP58      | 6122042..6nucleolar protein requi orf19.1199   | 7161 CaNOP58     | TRANSCR molecular_function unknown                                                          |
| CA1439 | 1.4 | 1.4 | 1.2 | 1.2 | IPF19602   | complemer similar to Saccharomy orf19.4488     | 19602 IPF19602   | C-compour transcription regulator activity                                                  |
| CA1440 | 0.5 | 0.8 | 0.9 | 1.2 | RPL17B     | 6132795..6RPL17B ribosomal pro orf19.4490      | 4772 CaRPL17B    | PROTEIN †structural molecule activity                                                       |
| CA1441 | 0.6 | 1.5 | 1.0 | 1.0 | QCR8       | 6134541..6ubiquinol-cytochrome-c reductase cl  | 4774 CaQCR8      | ENERGY †transporter activity,oxidoreductase activity                                        |
| CA1442 | 0.7 | 1.0 | 0.9 | 1.2 | ERG20      | complemer farnesyl-pyrophosphat orf19.4491     | 4775 CaERG20     | Lipid fatty-εtransferase activity                                                           |
| CA1443 | 1.3 | 1.0 | 1.1 | 0.9 | IPF4776    | complemer unknown Function orf19.4492          | 4776 IPF4776     | TRANSCR molecular_function unknown                                                          |
| CA1444 | 1.1 | 1.0 | 1.0 | 1.1 | KTR2       | complemer mannosyltransferase (l orf19.4494    | 4778 CaKTR2      | C-compour transferase activity                                                              |
| CA1445 | 0.9 | 0.9 | 1.0 | 0.9 | MRP51      | 6142233..6Mitochondrial ribosom: orf19.185     | 13417 CaMRP51    | PROTEIN †structural molecule activity                                                       |
| CA1446 | 1.0 | 1.1 | 1.4 | 1.0 | YAL011     | complemer mitochondrial transit pe orf19.190   | 15052 CaYAL011   | SUBCELLULAR LOCALISATION                                                                    |
| CA1447 | 1.1 | 1.0 | 1.1 | 0.8 | NRK1       | complemer Cdc31p-interacting ser orf19.191     | 15055 CaNRK1     | CELL CYCLE AND DNA PROCESSING CONTROL OF CELLULAR ORGANIZATION                              |
| CA1448 | 1.0 | 1.1 | 1.1 | 1.1 | IPF14728   | complemer unknown function orf19.192           | 14728 IPF14728   | No significant S.c. match                                                                   |
| CA1449 | 0.9 | 0.8 | 1.1 | 0.9 | IPF14730.ε | 6153650..6unknown function, 5-prorf19.193      | 14730 IPF14730.ε | No significant S.c. match                                                                   |
| CA1450 | 0.8 | 1.1 | 1.0 | 1.2 | IPF6474    | complemer unknown function orf19.4414          | 6474 IPF6474     | TRANSCRIPTION SUBCELLULAR LOCALISATION                                                      |
| CA1452 | 0.6 | 1.1 | 0.9 | 1.1 | REV1       | 6158529..6DNA repair protein (by orf19.4412    | 6472 CaREV1      | CELL CYC nucleotidyltransferase activity                                                    |
| CA1453 | 1.1 | 1.0 | 0.8 | 0.9 | HOS1       | 6162044..6Putative histon deacet orf19.4411    | 6469 CaHOS1      | TRANSCR hydrolase activity                                                                  |
| CA1454 | 0.6 | 0.9 | 1.0 | 1.1 | ALG1       | complemer beta-1,4-mannosyltran orf19.4410     | 19918 CaALG1     | C-compour transferase activity                                                              |
| CA1455 | 1.0 | 1.0 | 1.1 | 0.9 | IPF15081   | 6165189..6phosphodiesterase (by l orf19.4409   | 15081 IPF15081   | UNCLASSI molecular_function unknown                                                         |
| CA1456 | 1.0 | 1.1 | 1.0 | 1.1 | IPF11835.ζ | complemer unknown function orf19.612           | 15083 IPF11835.ζ | No significant S.c. match                                                                   |
| CA1457 | 1.1 | 0.9 | 1.0 | 0.9 | IPF8287    | 6171083..6unknown function orf19.612           | 8287 IPF8287     | UNCLASSI molecular_function unknown                                                         |
| CA1458 | 1.2 | 0.2 | 0.9 | 1.1 | IPF6342    | 6191478..6unknown function orf19.1106          | 6342 IPF6342     | No significant S.c. match                                                                   |
| CA1459 | 1.9 | 1.4 | 1.5 | 1.0 | IPF6340    | 6194741..6unknown function orf19.1107          | 6340 IPF6340     | UNCLASSIFIED PROTEINS                                                                       |
| CA1460 | 0.6 | 1.1 | 0.9 | 1.0 | HAM1       | complemer Controls 6-N-hydroxyle orf19.1108    | 6339 CaHAM1      | CELL RES molecular_function unknown                                                         |
| CA1461 | 1.0 | 1.1 | 0.9 | 0.8 | IPF6338    | complemer unknown function orf19.1109          | 6338 IPF6338     | No significant S.c. match                                                                   |
| CA1462 | 0.8 | 1.0 | 1.4 | 1.0 | THI80      | complemer Thiamin pyrophosphok orf19.8707      | 6335 CaTHI80     | Metabolism transferase activity                                                             |
| CA1464 | 2.5 | 1.5 |     | 1.3 | PYC2.EXO   | 6201408..6Pyruvate carboxylase ;orf19.789      | 15167 CaPYC2.e   | C-compour ligase activity                                                                   |
| CA1465 | 4.1 | 2.6 | 2.3 | 1.2 | RIM11      | complemer Ser/thr protein kinase (orf19.791    | 18668 CaRIM11    | CELL CYCLE AND DNA PROCESSING TRANSCRIPTION SUBCELLULAR LOCALISATION                        |
| CA1466 | 2.2 | 2.3 | 1.3 | 1.5 | IPF13324   | complemer unknown function orf19.8411          | 13324 IPF13324   | No significant S.c. match                                                                   |
| CA1467 | 0.7 | 1.1 | 1.1 | 0.9 | IPF5082    | complemer similar to Saccharomy orf19.8412     | 5082 IPF5082     | CELL CYC protein kinase activity                                                            |
| CA1468 | 1.3 | 1.0 | 0.8 | 0.8 | SRB10      | complemer cyclin-dependent kinas orf19.794     | 5080 CaSRB10     | C-compour protein kinase activity,transcription regulator activity                          |
| CA1469 | 1.0 | 0.9 | 1.1 | 1.2 | IPF5078    | complemer unknown function orf19.8414          | 5078 IPF5078     | PROTEIN †signal transducer activity                                                         |
| CA1470 | 1.5 | 0.9 | 1.1 | 0.7 | IPF17942   | 6214621..6unknown function orf19.8415          | 17942 IPF17942   | CELL FAT†transcription regulator activity                                                   |
| CA1471 | 0.9 | 0.8 | 1.3 | 0.9 | ALS2.3FE   | complemer agglutinin-like protein, orf19.1098  | 15450 CaALS2.3f  | SUBCELLULAR LOCALISATION Other virulence attributes                                         |
| CA1474 | 0.8 | 0.9 | 1.0 | 1.0 | IPF10208   | complemer chloride channel-like p orf19.1096   | 10208 IPF10208   | CELLULAR TRANSPORT AND TRANSPORT MECHANISMS REGULATION OF/INTERACTION WITH CELLULAR ENVIRON |
| CA1475 | 0.7 | 0.7 | 0.7 | 0.9 | GLE2       | 6231541..6nuclear pore complex orf19.1095      | 10209 CaGLE2     | TRANSCR structural molecule activity                                                        |
| CA1476 | 4.5 | 1.0 | 1.4 | 1.0 | IPF10214   | 6235149..6unknown function orf19.1093          | 10214 IPF10214   | No significant S.c. match                                                                   |
| CA1477 | 1.4 |     | 1.1 |     | YME1       | complemer family of ATPases orf19.1252         | 14644 CaYME1     | PROTEIN †peptidase activity                                                                 |
| CA1478 | 0.4 | 1.1 | 1.0 | 1.0 | IPF16426   | 6245915..6similar to human BRR† orf19.1251     | 16426 IPF16426   | CELL CYC molecular_function unknown                                                         |
| CA1479 | 0.8 | 0.9 | 1.0 | 1.0 | IPF16428   | complemer unknown function orf19.1250          | 16428 IPF16428   | UNCLASSI molecular_function unknown                                                         |
| CA1480 | 0.9 | 1.1 | 1.1 | 1.1 | HIS6       | 6249378..65 Pro-FAR isomerase orf19.1249       | 15577 CaHIS6     | Amino acid isomerase activity                                                               |
| CA1481 | 0.5 | 1.2 | 1.0 | 0.9 | RPB3       | complemer DNA-directed RNA-pol orf19.8832      | 15576 CaRPB3     | TRANSCR nucleotidyltransferase activity                                                     |

|        |     |     |     |     |            |                                               |             |       |            |                                                                                                                   |
|--------|-----|-----|-----|-----|------------|-----------------------------------------------|-------------|-------|------------|-------------------------------------------------------------------------------------------------------------------|
| CA1482 | 1.0 | 1.0 | 0.9 | 1.0 | IPF15575   | 6251477..6unknown function                    | orf19.8831  | 15575 | IPF15575   | No significant S.c. match                                                                                         |
| CA1483 | 0.9 | 1.0 | 1.2 | 1.1 | YHC3       | complemer involved in cellular pH             | orf19.4059  | 10526 | CaYHC3     | CLASSIFICmolecular_function unknown                                                                               |
| CA1484 | 1.1 | 0.8 | 0.9 | 0.9 | ARO4       | 6259877..63-dehydro-deoxyphosp                | orf19.4060  | 10524 | CaARO4     | Amino acid dehydroferase activity                                                                                 |
| CA1485 | 0.9 | 1.0 | 0.9 | 1.1 | IPF20082   | complemer unknown function                    | orf19.4061  | 20082 | IPF20082   | UNCLASSImolecular_function unknown                                                                                |
| CA1486 | 1.0 | 1.0 | 1.1 | 0.9 | IPF10521   | complemer unknown function                    | orf19.4062  | 10521 | IPF10521   | No significant S.c. match                                                                                         |
| CA1487 | 1.5 | 1.2 | 1.3 | 0.8 | GPT1       | complemer polyamine transporter               | orf19.4063  | 10519 | CaGPT1     | No significant S.c. match                                                                                         |
| CA1488 | 1.5 | 1.1 | 1.1 | 0.8 | IPF17402   | 6267628..6unknown function                    | orf19.4064  | 17402 | IPF17402   | SUBCELLLtransferase activity                                                                                      |
| CA1489 | 0.7 | 1.0 | 0.8 | 1.1 | ATP3.3     | complemer F1F0-ATPase comple                  | orf19.10734 | 163   | CaATP3.3   | ENERGY (transporter activity                                                                                      |
| CA1490 | 2.1 | 1.1 | 1.1 | 1.2 | IPF165     | complemer unknown function                    |             | 165   | IPF165     | No significant S.c. match                                                                                         |
| CA1491 | 1.4 | 0.8 | 0.7 | 1.0 | IPF166     | 6273822..6unknown function                    | orf19.3225  | 166   | IPF166     | TRANSPOMolecular_function unknown                                                                                 |
| CA1492 | 1.3 | 1.1 | 1.1 | 1.1 | IPF168     | 6277773..6unknown function                    | orf19.3226  | 168   | IPF168     | UNCLASSImolecular_function unknown                                                                                |
| CA1493 | 0.9 | 1.1 | 1.2 | 1.3 | FTH2       | 6279115..6iron transporter (by hor            | orf19.3227  | 170   | CaFTH2     | REGULATION OF/INTERACTION WITH CELLULAR ENVIRONMENT TRANSPORT FACILITATION Other virulence attributes             |
| CA1494 | 1.6 | 1.1 | 0.9 | 1.1 | IPF171     | complemer unknown function                    | orf19.3228  | 171   | IPF171     | UNCLASSImolecular_function unknown                                                                                |
| CA1495 | 1.4 | 1.0 | 1.1 | 0.8 | IPF9686    | 6289847..6similar to Saccharomy               | orf19.3647  | 9686  | IPF9686    | CELLULAFprotein binding                                                                                           |
| CA1496 | 1.3 | 0.9 | 1.3 | 0.5 | CTR1       | complemer copper transport protei             | orf19.3646  | 9685  | CaCTR1     | CELLULAFtransporter activity                                                                                      |
| CA1497 | 1.0 | 0.9 | 1.0 | 1.1 | IPF9683    | complemer unknown function                    | orf19.3644  | 9683  | IPF9683    | TRANSCRIPTION                                                                                                     |
| CA1498 | 0.8 | 0.9 | 1.1 | 1.0 | IPF12371   | complemer extracellular alpha-1,4-            | orf19.3643  | 12371 | IPF12371   | TRANSCRIPTION                                                                                                     |
| CA1499 | 1.6 | 1.0 | 0.9 | 1.2 | IPF6521.3f | 6303710..6similar to Saccharomyces cerevisiae |             | 13224 | IPF6521.3f | TRANSCRIPTION SUBCELLULAR LOCALISATION                                                                            |
| CA1500 | 1.0 | 1.1 | 1.3 | 1.2 | IPF13221   | 6308626..6unknown function                    | orf19.1697  | 13221 | IPF13221   | UNCLASSImolecular_function unknown                                                                                |
| CA1501 | 0.9 | 1.2 | 1.0 | 0.9 | IPF13217   | complemer unknown function                    | orf19.9265  | 13217 | IPF13217   | UNCLASSImolecular_function unknown                                                                                |
| CA1502 | 0.6 | 0.5 | 0.8 | 0.8 | RPS7A      | complemer ribosomal protein (by h             | orf19.9267  | 13662 | CaRPS7A    | PROTEIN (structural molecule activity                                                                             |
| CA1503 | 0.7 | 0.8 | 1.2 | 1.1 | RK11       | 6315794..6D-ribose-5-phosphate                | orf19.9268  | 13663 | CaRK11     | C-compour isomerase activity                                                                                      |
| CA1504 | 0.5 | 0.9 | 0.7 | 0.8 | ARF3       | complemer GTP-binding protein of              | orf19.1702  | 13664 | CaARF3     | PROTEIN FATE [folding modification destination] ""CELLULAR TRANSPORT AND TRANSPORT MECHANISMS                     |
| CA1505 | 1.2 | 1.2 | 1.2 | 0.9 | POT1       | 6319848..6Acetyl-CoA C-acyltrans              | orf19.9271  | 17552 | CaPOT1     | Lipid fatty-acid and isoprenoid metabolism ""ENERGY SUBCELLULAR LOCALISATION                                      |
| CA1506 | 1.4 | 0.3 | 0.5 | 0.4 | HGT11      | 6323821..6hexose transporter                  | orf19.4527  | 9983  | CaHGT11    | C-compour molecular_function unknown                                                                              |
| CA1507 | 1.5 | 1.0 | 1.3 | 1.1 | HSP30      | 6328488..6heat shock protein (by              | orf19.4526  | 9978  | CaHSP30    | CELL RES chaperone activity                                                                                       |
| CA1508 | 1.0 | 0.9 | 1.0 | 0.8 | IPF9977    | 6329966..6unknown function                    | orf19.4525  | 9977  | IPF9977    | UNCLASSImolecular_function unknown                                                                                |
| CA1509 | 1.3 | 1.0 | 1.1 | 1.2 | IPF19920.3 | complemer unknown function, 3-pr              | orf19.4524  | 19920 | IPF19920.3 | Amino acid metabolism TRANSCRIPTION SUBCELLULAR LOCALISATION                                                      |
| CA1510 | 1.1 | 1.0 | 1.2 | 0.9 | IPF9973    | 6333605..6similar to Saccharomy               | orf19.4523  | 9973  | IPF9973    | Metabolism ligase activity                                                                                        |
| CA1511 | 0.9 | 1.2 | 1.0 | 1.0 | IPF9972.3f | complemer unknown function, 3-pr              | orf19.4522  | 9972  | IPF9972.3f | ENERGY molecular_function unknown                                                                                 |
| CA1512 | 0.4 | 1.1 | 1.0 | 0.9 | IPF15255   | 6341070..6unknown function                    | orf19.4884  | 15255 | IPF15255   | CLASSIFICmolecular_function unknown                                                                               |
| CA1513 | 1.1 | 1.6 | 1.1 | 1.1 | MIR1       | 6346913..6phosphate transport pr              | orf19.4885  | 7536  | CaMIR1     | Phosphate transporter activity                                                                                    |
| CA1514 | 1.6 | 1.0 | 0.7 | 1.0 | IPF7539    | 6349709..6unknown function                    | orf19.4886  | 7539  | IPF7539    | No significant S.c. match                                                                                         |
| CA1515 | 1.4 | 1.6 | 1.2 | 0.9 | ECM21.3    | complemer Involved in cell wall bic           | orf19.12351 | 18663 | CaECM21.3  | CONTROL molecular_function unknown                                                                                |
| CA1516 | 1.2 | 0.9 | 0.9 | 1.1 | IPF16764   | 6355294..6unknown function                    | orf19.4796  | 16764 | IPF16764   | PROTEIN SYNTHESIS SUBCELLULAR LOCALISATION                                                                        |
| CA1517 | 1.3 | 1.1 | 1.2 | 1.0 | IPF11045   | complemer unknown function                    | orf19.4798  | 11045 | IPF11045   | UNCLASSImolecular_function unknown                                                                                |
| CA1518 | 1.0 | 1.3 | 1.0 | 1.2 | IPF11040   | 6360312..6similar to Schizosacch              | orf19.4799  | 11040 | IPF11040   | CELL CYC RNA binding                                                                                              |
| CA1519 | 1.1 | 1.1 | 1.0 | 1.0 | RIM20      | 6362353..6Rim101 activating prot              | orf19.4800  | 11037 | CaRIM20    | UNCLASSImolecular_function unknown                                                                                |
| CA1520 | 1.4 | 1.0 | 1.0 | 0.8 | IPF11035   | 6364914..6similar to Saccharomy               | orf19.4801  | 11035 | IPF11035   | TRANSCR transferase activity                                                                                      |
| CA1521 | 1.0 | 0.7 | 0.9 | 1.1 | FTH1       | complemer iron transporter                    | orf19.4802  | 11034 | CaFTH1     | REGULATI molecular_function unknown                                                                               |
| CA1522 | 0.7 | 0.8 | 1.2 | 1.0 | IPF6916    | complemer unknown function                    | orf19.3791  | 6916  | IPF6916    | No significant S.c. match                                                                                         |
| CA1523 | 1.0 | 1.3 | 1.3 | 1.1 | PAT1       | 6372742..6Topoisomerase II-assc               | orf19.3792  | 6915  | CaPAT1     | CELL CYC molecular_function unknown                                                                               |
| CA1524 | 1.0 | 1.2 | 1.0 | 1.0 | SUR1       | 6380868..6Suppressor of ROK1                  | orf19.3794  | 6909  | CaSUR1     | TRANSCR DNA binding                                                                                               |
| CA1525 | 1.2 | 0.8 | 1.0 | 1.0 | AGP3       | 6383816..6amino acid-permease                 | orf19.3795  | 6906  | CaAGP3     | Amino acid transporter activity                                                                                   |
| CA1526 | 1.9 | 0.9 | 1.0 | 1.1 | IPF13815   | 6398814..6unknown function                    | orf19.4553  | 13815 | IPF13815   | No significant S.c. match                                                                                         |
| CA1528 | 5.1 | 3.3 | 3.2 | 1.6 | ALS4.3F    | 6408890..6agglutinin-like protein,            | orf19.4556  | 13009 | CaALS4.3F  | C-compound and carbohydrate metabolism SUBCELLULAR LOCALISATION Other virulence attributes                        |
| CA1529 | 1.3 | 1.0 | 0.9 | 1.0 | SPC105     | 6411436..6Spindle pole body prot              | orf19.4557  | 15446 | CaSPC105   | SUBCELLL structural molecule activity                                                                             |
| CA1530 | 1.2 | 0.9 | 0.7 | 1.1 | ALG2.5     | 6418468..6mannosyltransferase, t              | orf19.1221  | 9503  | CaALG2.5   | C-compour transferase activity                                                                                    |
| CA1531 | 0.7 | 1.0 | 1.2 | 0.9 | RVS167     | complemer (putative) cytoskeletal             | orf19.1220  | 9505  | CaRVS167   | CELL FAT protein binding                                                                                          |
| CA1532 | 1.5 | 0.9 | 0.9 | 1.1 | IPF9507    | 6421659..6unknown function                    | orf19.8806  | 9507  | IPF9507    | UNCLASSImolecular_function unknown                                                                                |
| CA1533 | 1.0 | 1.0 | 1.0 | 1.2 | IPF9510    | complemer unknown function                    | orf19.8803  | 9510  | IPF9510    | No significant S.c. match                                                                                         |
| CA1534 | 0.8 | 1.1 | 1.2 | 0.9 | MAP2       | 6428609..6methionine aminopepti               | orf19.1214  | 9511  | CaMAP2     | PROTEIN (peptidase activity                                                                                       |
| CA1535 | 0.7 | 0.8 | 1.0 | 1.0 | IPF9515    | 6432481..6similar to Saccharomy               | orf19.8800  | 9515  | IPF9515    | C-compour protein binding                                                                                         |
| CA1536 | 2.1 | 1.5 | 1.5 | 1.1 | SOK1       | 6443209..6high copy suppressor                | orf19.4511  | 13595 | CaSOK1     | TRANSCR molecular_function unknown                                                                                |
| CA1537 | 0.9 | 0.8 | 1.2 | 1.1 | IPF17483   | complemer unknown function                    | orf19.4550  | 17483 | IPF17483   | No significant S.c. match                                                                                         |
| CA1538 | 0.8 | 0.9 | 1.0 | 1.0 | ID1.3EOC   | complemer Isopentenyl-diphospha               | orf19.4558  | 1053  | CaID1.3ec  | Lipid fatty-acid and isoprenoid metabolism ""SUBCELLULAR LOCALISATION                                             |
| CA1539 | 0.7 | 1.0 | 1.1 | 1.0 | BFR1       | 6456504..6Similar to Saccharomy               | orf19.4560  | 1051  | CaBFR1     | CELL CYC RNA binding                                                                                              |
| CA1540 | 1.3 | 1.0 | 1.0 | 1.1 | IPF1047    | 6458249..6unknown function                    | orf19.4563  | 1047  | IPF1047    | UNCLASSImolecular_function unknown                                                                                |
| CA1541 | 0.4 | 0.6 | 1.1 | 1.1 | BGL21      | 6460091..6endo-beta-1,3-gluca                 | orf19.4565  | 1046  | CaBGL21    | C-compour hydrolase activity                                                                                      |
| CA1542 | 0.9 | 1.0 | 1.3 | 1.0 | ROT11      | 6461381..6Putative membrane pr                | orf19.4566  | 1044  | CaROT11    | CELL CYCLE AND DNA PROCESSING                                                                                     |
| CA1543 | 0.5 | 1.0 | 1.2 | 0.9 | IPF1043    | 6462725..6Similar to hydroxyquin              | orf19.4567  | 1043  | IPF1043    | No significant S.c. match                                                                                         |
| CA1544 | 0.7 | 0.9 | 1.0 | 0.9 | IPF1040    | 6464496..6Similar to transcrip                | orf19.4568  | 1040  | IPF1040    | C-compound and carbohydrate metabolism TRANSCRIPTION SUBCELLULAR LOCALISATION                                     |
| CA1545 | 2.2 | 1.2 | 1.0 | 1.3 | CDR3.5EO   | complemer ABC transporter, multik             | orf19.1313  | 14709 | CaCDR3.5   | Lipid fatty-acid and isoprenoid metabolism """"CELL RESCUE DEFENSE AND VIRULENCE ""REGULATION OF/INTERACTIO       |
| CA1546 | 0.8 | 1.1 | 1.0 | 0.9 | IPF6671    | 6475739..6unknown function                    | orf19.8891  | 6671  | IPF6671    | UNCLASSImolecular_function unknown                                                                                |
| CA1547 |     |     |     |     | IPF6672    | complement(6478315..6480216)                  |             |       |            |                                                                                                                   |
| CA1548 | 1.0 | 1.2 | 0.8 | 1.1 | IPF8746    | 6485521..6putative alpha-1,3-mar              | orf19.4279  | 8746  | IPF8746    | C-compound and carbohydrate metabolism ""PROTEIN FATE [folding modification destination] ""SUBCELLULAR LOCALISATI |
| CA1549 | 1.3 | 1.1 | 1.0 | 0.9 | IPF8744    | 6488638..6unknown function                    | orf19.4278  | 8744  | IPF8744    | TRANSCR molecular_function unknown                                                                                |
| CA1550 | 0.8 | 1.0 | 0.8 | 1.0 | IPF8741.5f | 6491170..6unknown function, 5-pr              | orf19.4276  | 8742  | IPF8741.5f | No significant S.c. match                                                                                         |
| CA1551 | 1.2 | 0.8 | 0.9 | 0.9 | IPF8741.3f | 6492327..6unknown function, 3-pr              | orf19.4275  | 8741  | IPF8741.3f | CELL CYC protein binding                                                                                          |
| CA1552 | 2.3 | 1.3 | 1.1 | 1.1 | PUT1       | complemer proline oxidase (by hor             | orf19.4274  | 8739  | CaPUT1     | Amino acid oxidoreductase activity                                                                                |
| CA1553 | 0.9 | 0.8 | 0.9 | 1.1 | IPF14081   | complemer unknown function                    | orf19.1714  | 14081 | IPF14081   | No significant S.c. match                                                                                         |

|        |     |     |     |     |          |                                        |              |       |            |                                                                                      |
|--------|-----|-----|-----|-----|----------|----------------------------------------|--------------|-------|------------|--------------------------------------------------------------------------------------|
| CA1554 | 1.2 | 1.2 | 1.1 | 1.1 | GEA2.3F  | complemer GTP/GDP exchange fe          | orf19.1713   | 14077 | CaGEA2.3I  | CELLULAFenzyme regulator activity                                                    |
| CA1556 | 1.0 | 1.3 | 1.1 | 1.1 | END3     | 6505531..6 required for endocytos      | orf19.1711   | 15676 | CaEND3     | CELLULAFprotein binding                                                              |
| CA1557 | 2.6 | 1.2 | 1.0 | 0.9 | IPF15677 | complemer probable NADH-ubiqui         | orf19.1710   | 15677 | IPF15677   | No significant S.c. match                                                            |
| CA1558 | 2.0 | 1.7 |     | 1.1 | IPF15679 | complemer lipid transfer protein (b    | orf19.1709   | 15679 | IPF15679   | No significant S.c. match                                                            |
| CA1559 | 1.1 | 0.9 | 1.0 | 1.0 | IPF16533 | 6510839..6 unknown function            | orf19.1708   | 16533 | IPF16533   | No significant S.c. match                                                            |
| CA1560 | 1.0 | 1.0 | 1.0 | 0.9 | MET18    | complemer Involved in NER repair       | orf19.1706   | 16088 | CaMET18    | CELL CYC transcription regulator activity                                            |
| CA1561 | 1.7 | 2.0 | 1.3 | 1.0 | POT12    | complemer peroxysomal 3-ketoacy        | orf19.1704   | 16087 | CaPOT12    | Lipid fatty-acid and isoprenoid metabolism ""ENERGY SUBCELLULAR LOCALISATION         |
| CA1563 | 0.9 | 0.9 | 0.9 | 0.8 | IPF13855 | 6535766..6 unknown function            | orf19.4713   | 13855 | IPF13855   | No significant S.c. match                                                            |
| CA1564 | 0.9 | 0.8 | 1.0 | 0.8 | GAD1     | complemer Glutamate decarboxylz        | orf19.1153   | 7609  | CaGAD1     | Amino acid lyase activity                                                            |
| CA1565 | 0.2 |     | 0.6 | 0.9 | EGD1     | complemer GAL4 DNA-binding enl         | orf19.1154   | 7610  | CaEGD1     | C-compour chaperone activity                                                         |
| CA1566 | 0.9 | 0.9 | 0.9 | 1.1 | DPP2     | 6543266..6 Diacylglycerol pyrho        | orf19.1155   | 7611  | CaDPP2     | Lipid fatty-acid and isoprenoid metabolism ""CELL CYCLE AND DNA PROCESSING CELL FATE |
| CA1567 | 1.0 | 1.0 | 1.0 | 0.8 | IPF7613  | 6544566..6 unknown function            | orf19.1156   | 7613  | IPF7613    | CELL RESCUE DEFENSE AND VIRULENCE ""SUBCELLULAR LOCALISATION                         |
| CA1568 | 0.9 | 0.9 | 1.4 | 1.1 | IPF7615  | complemer unknown function             | orf19.1158   | 7615  | IPF7615    | UNCLASSIFIED PROTEINS                                                                |
| CA1569 | 1.0 | 0.9 | 1.4 | 1.2 | IPF7616  | 6546850..6 putative homoserine O       | orf19.1159   | 7616  | IPF7616    | Amino acid metabolism SUBCELLULAR LOCALISATION                                       |
| CA1570 | 0.8 | 0.7 |     | 1.0 | IPF7617  | complemer unknown function             | orf19.1160   | 7617  | IPF7617    | UNCLASSImolecular_function unknown                                                   |
| CA1571 | 1.4 | 1.0 | 1.0 | 1.0 | SPO14.3E | complemer phospholipase D, 3-prime end |              | 7619  | CaSPO14.3I | Lipid fatty-acid and isoprenoid metabolism ""CELL CYCLE AND DNA PROCESSING CELL FATE |
| CA1572 | 5.3 | 4.0 | 3.1 | 1.6 | POX4     | 6553045..6 peroxisomal fatty acyl-     | orf19.9221   | 15088 | CaPOX4     | Lipid fatty-oxidoreductase activity                                                  |
| CA1573 | 0.9 | 0.9 | 0.9 | 0.9 | IPF15087 | 6555631..6 unknown function            | orf19.1653   | 15087 | IPF15087   | UNCLASSIFIED PROTEINS                                                                |
| CA1574 | 2.5 | 2.4 | 1.6 | 1.5 | PXP2     | complemer acyl-CoA oxidase pero        | orf19.1655   | 13474 | CaPXP2     | Lipid fatty-acid and isoprenoid metabolism ""ENERGY SUBCELLULAR LOCALISATION         |
| CA1576 | 0.1 | 0.0 | 0.3 | 0.1 | HYR1     | 6570537..6 hyphally regulated prot     | orf19.12440  | 19734 | CaHYR1     | Hypha-specific No significant S.c. match                                             |
| CA1577 | 2.0 | 1.7 | 1.9 | 1.1 | KNS1     | 6578007..6 Ser/thr protein kinase      | (orf19.12446 | 11410 | CaKNS1     | CLASSIFICprotein kinase activity                                                     |
| CA1578 | 0.9 | 0.9 | 1.2 | 1.1 | NUM11    | complemer nuclear migration prote      | orf19.4715   | 8243  | CaNUM11    | CELL CYC protein binding                                                             |
| CA1579 | 2.4 | 1.7 | 2.1 | 1.0 | GDH3     | complemer NADP-glutamate dehy          | orf19.4716   | 8236  | CaGDH3     | Amino acid oxidoreductase activity                                                   |
| CA1580 | 1.0 | 1.0 | 1.2 | 1.1 | TRP5     | 6591781..6 tryptophan synthase (t      | orf19.4718   | 8232  | CaTRP5     | Amino acid lyase activity                                                            |
| CA1581 | 1.0 | 1.0 | 1.2 | 0.9 | CWH41.3E | complemer ER glucosidase I, 3-pri      | orf19.4719   | 8229  | CaCWH41    | C-compour hydrolase activity                                                         |
| CA1582 | 0.3 | 0.3 | 0.4 | 1.0 | CLN21    | 6600806..6 G1 cyclin (by homolog)      | orf19.6028   | 15332 | CaCLN21    | CELL CYC protein kinase activity,enzyme regulator activity                           |
| CA1583 | 1.3 | 1.2 | 1.0 | 1.3 | ROT1     | 6605304..6 Suppressor of TOR2 r        | orf19.6029   | 18655 | CaROT1     | CELL CYC molecular_function unknown                                                  |
| CA1584 | 1.2 | 1.0 | 1.0 | 0.8 | IPF15824 | complemer unknown function             | orf19.6030   | 15824 | IPF15824   | No significant S.c. match                                                            |
| CA1585 | 1.5 | 1.4 | 1.5 | 1.1 | VPS27    | 6607805..6 Vacuolar protein sortin     | orf19.6031   | 15825 | CaVPS27    | PROTEIN Iprotein binding                                                             |
| CA1586 | 0.6 | 0.7 | 0.8 | 1.3 | ODC1     | 6611062..6 Ornithine decarboxylas      | orf19.6032   | 1466  | CaODC1     | Secondary lyase activity                                                             |
| CA1587 | 1.1 | 1.0 | 0.9 | 0.9 | CMP2     | 6613123..6 Calcineurin B, catalytic    | orf19.6033   | 1465  | CaCMP2     | TRANSCR protein phosphatase activity                                                 |
| CA1588 | 0.7 | 0.9 | 1.0 | 1.1 | SPT8     | 6619516..6 transcriptional adaptor     | orf19.11787  | 16990 | CaSPT8     | TRANSCR transcription regulator activity                                             |
| CA1589 | 1.1 | 0.9 |     | 1.0 | IPF16988 | complemer unknown function             | orf19.11788  | 16988 | IPF16988   | No significant S.c. match                                                            |
| CA1590 | 1.1 | 1.0 | 1.1 | 1.0 | IPF14665 | complemer unknown function             | orf19.11790  | 14665 | IPF14665   | UNCLASSIenzyme regulator activity                                                    |
| CA1591 | 0.6 | 0.9 | 1.0 | 1.2 | IPF14663 | 6625398..6 unknown function            | orf19.11791  | 14663 | IPF14663   | UNCLASSIFIED PROTEINS                                                                |
| CA1592 | 1.1 | 0.9 | 1.0 | 1.0 | IPF14662 | complemer D-xylose reductase (b)       | orf19.4317   | 14662 | IPF14662   | C-compour oxidoreductase activity                                                    |
| CA1593 | 1.0 | 0.9 | 1.1 | 1.1 | MIG1     | complemer transcriptional regulato     | orf19.4318   | 11048 | CaMIG1     | C-compour transcription regulator activity                                           |
| CA1594 | 0.9 | 0.9 | 1.2 | 1.0 | IPF11051 | complemer unknown function             | orf19.4321   | 11051 | IPF11051   | No significant S.c. match                                                            |
| CA1595 | 0.7 | 0.7 | 0.9 | 1.1 | IPF9544  | 6636402..6 unknown function            | orf19.7905   | 9544  | IPF9544    | UNCLASSImolecular_function unknown                                                   |
| CA1596 | 1.6 | 0.8 | 1.6 | 1.1 | FAA21    | 6640140..6 long-chain-fatty-acid-C     | orf19.272    | 9539  | CaFAA21    | Lipid fatty-ε ligase activity                                                        |
| CA1597 | 0.9 | 0.9 | 1.0 | 1.2 | IPF9538  | complemer unknown function             | orf19.271    | 9538  | IPF9538    | ENERGY SUBCELLULAR LOCALISATION                                                      |
| CA1598 | 0.7 | 0.8 | 0.8 | 1.0 | SES1     | complemer seryl-tRNA synthetase        | orf19.7901   | 9534  | CaSES1     | No significligase activity                                                           |
| CA1599 | 1.2 | 0.9 | 0.9 | 0.9 | IPF11452 | 6646907..6 unknown function            | orf19.7900   | 11452 | IPF11452   | CELL CYC molecular_function unknown                                                  |
| CA1600 | 0.6 | 0.8 | 0.8 | 1.0 | CTR2     | 6650213..6 copper transport protei     | orf19.4720   | 15729 | CaCTR2     | CELLULAFtransporter activity                                                         |
| CA1601 | 0.8 | 1.0 | 0.8 | 1.2 | IPF15728 | 6651071..6 unknown function            | orf19.4721   | 15728 | IPF15728   | No significant S.c. match                                                            |
| CA1602 | 0.9 | 0.9 | 1.0 | 1.0 | RTG1     | 6652812..6 basic helix-loop-helix t    | orf19.4722   | 13658 | CaRTG1     | C-compour transcription regulator activity                                           |
| CA1603 | 1.1 | 1.0 | 1.1 | 0.9 | FAD1     | complemer flavin adenine dinuclec      | orf19.4723   | 13656 | CaFAD1     | Metabolism nucleotidyltransferase activity                                           |
| CA1604 | 1.0 | 1.1 | 1.3 | 1.0 | IPF13653 | complemer unknown function             | orf19.4724   | 13653 | IPF13653   | TRANSCR RNA binding                                                                  |
| CA1605 | 0.8 | 0.9 | 1.0 | 0.9 | SWI6     | 6656250..6 Transcription factor (b)    | orf19.4725   | 17885 | CaSWI6     | CELL CYC protein binding                                                             |
| CA1606 | 1.0 | 1.1 | 0.7 | 1.1 | NCS1     | complemer Calcium binding protei       | orf19.4726   | 16484 | CaNCS1     | CELLULAR COMMUNICATION/SIGNAL TRANSDUCTION MECHANISM                                 |
| CA1607 | 0.8 | 0.9 | 1.1 | 1.2 | IPF14916 | 6659506..6 unknown function            | orf19.4727   | 16483 | IPF14916   | UNCLASSImolecular_function unknown                                                   |
| CA1608 | 1.4 | 0.8 |     | 0.8 | TES12    | complemer Thiosterase (by homol        | orf19.4122   | 5877  | CaTES12    | Lipid fatty-γhydrolase activity                                                      |
| CA1609 | 0.7 | 1.2 | 1.1 | 1.0 | TES11    | complemer Thiosterase (by homol        | orf19.4121   | 5879  | CaTES11    | Lipid fatty-acid and isoprenoid metabolism ""SUBCELLULAR LOCALISATION                |
| CA1610 |     | 1.2 | 0.9 | 0.8 | LAS1     | 6667577..6 cell morphogenesis, cy      | orf19.4120   | 5882  | CaLAS1     | CELL CYC molecular_function unknown                                                  |
| CA1611 | 1.6 | 1.4 | 1.2 | 1.1 | SPO72    | 6669692..6 required for sporulator     | orf19.4119   | 12198 | CaSPO72    | CELL CYC molecular_function unknown                                                  |
| CA1612 | 1.4 | 1.1 | 1.1 | 1.0 | IFJ6     | complemer unknown function             | orf19.3214   | 12814 | CaIFJ6     | No significant S.c. match                                                            |
| CA1613 | 1.3 | 1.0 | 1.2 | 1.0 | IPF19735 | complemer unknown function             | orf19.3215   | 19735 | IPF19735   | UNCLASSIFIED PROTEINS                                                                |
| CA1614 | 1.0 | 0.8 | 1.1 | 1.2 | IPF18645 | complemer unknown function             | orf19.10728  | 18645 | IPF18645   | UNCLASSIFIED PROTEINS                                                                |
| CA1615 | 0.8 | 0.9 | 1.2 | 1.0 | IPF14540 | 6689569..6 putative multidrug prot     | orf19.3218   | 14540 | IPF14540   | TRANSCO molecular_function unknown                                                   |
| CA1616 | 0.4 | 0.9 | 0.7 | 0.9 | IPF14538 | 6693378..6 unknown function            | orf19.3219   | 14538 | IPF14538   | UNCLASSIFIED PROTEINS                                                                |
| CA1617 | 0.9 | 1.0 | 1.0 | 1.1 | IPF14536 | 6695614..6 unknown function            | orf19.3220   | 14536 | IPF14536   | UNCLASSImolecular_function unknown                                                   |
| CA1618 | 1.2 | 1.1 | 0.8 | 0.8 | RRP45    | complemer Protein component of t       | orf19.11559  | 2068  | CaRRP45    | TRANSCR RNA binding                                                                  |
| CA1619 | 1.2 | 1.3 | 1.2 | 1.1 | IPF2067  | complemer Required for mannosyl        | orf19.11558  | 2067  | IPF2067    | Lipid fatty-ε transferase activity                                                   |
| CA1620 | 1.3 | 1.2 | 1.2 | 1.3 | MET10    | 6704455..6 Sulfite reductase flavin    | orf19.4076   | 13194 | CaMET10    | Amino acid transporter activity                                                      |
| CA1621 | 1.5 | 1.1 | 0.9 | 0.9 | IFF6     | 6711242..6 unknown function            | orf19.11553  | 19647 | CaIFF6     | No significant S.c. match                                                            |
| CA1622 | 0.3 | 1.2 |     | 1.1 | IPF10045 | 6715191..6 similar to Saccharomy       | orf19.470    | 10045 | IPF10045   | TRANSCR transcription regulator activity                                             |
| CA1623 | 1.0 | 0.9 | 1.0 | 0.9 | STE7     | complemer MAP Kinase Kinase            | orf19.469    | 10048 | CaSTE7     | REGULATIprotein kinase activity                                                      |
| CA1624 | 1.3 | 1.0 | 0.8 | 0.8 | IPF10055 | complemer unknown function             | orf19.467    | 10055 | IPF10055   | No significant S.c. match                                                            |
| CA1625 | 0.9 | 1.3 | 0.8 | 1.2 | IPF6156  | 6732538..6 similar to C.elegans L1     | orf19.1034   | 6156  | IPF6156    | UNCLASSIFIED PROTEINS                                                                |
| CA1626 | 1.4 | 1.1 | 1.1 | 0.8 | STR2     | complemer O-succinylhomoserine         | orf19.1033   | 6155  | CaSTR2     | Amino acid transferase activity                                                      |
| CA1627 | 1.0 | 1.5 | 1.3 | 1.6 | SKO1.3   | 6736495..6 Cre-binding bzip protei     | orf19.1032   | 6153  | CaSKO1.3   | TRANSCR transcription regulator activity                                             |

|        |     |     |     |     |            |                                                 |                  |                                                                                                                        |
|--------|-----|-----|-----|-----|------------|-------------------------------------------------|------------------|------------------------------------------------------------------------------------------------------------------------|
| CA1628 | 1.1 | 0.9 | 1.0 | 1.1 | HMG1       | complemer 3-hydroxy-3-methylglu orf19.1031      | 19736 CaHMG1     | Lipid fatty-ε oxidoreductase activity                                                                                  |
| CA1629 | 0.8 | 1.2 | 1.2 | 0.9 | NPI46      | complemer proline cis-trans isome orf19.1030    | 14314 CaNPI46    | PROTEIN isomerase activity                                                                                             |
| CA1630 | 1.0 | 0.9 | 1.1 | 1.2 | RPP1       | 6745236..6required for processing orf19.1029    | 14315 CaRPP1     | TRANSCR RNA binding                                                                                                    |
| CA1631 | 0.9 | 0.9 | 1.0 | 1.0 | IPF19582   | complemer unknown function orf19.1028           | 19582 IPF19582   | UNCLASSItranscription regulator activity                                                                               |
| CA1632 | 0.8 | 1.0 | 1.2 | 0.9 | IPF10181   | 6750184..6similar to Saccharomy orf19.11420     | 10823 IPF10181   | UNCLASSIstructural molecule activity                                                                                   |
| CA1633 | 1.1 | 0.9 | 1.1 | 1.1 | IPF10180   | complemer unknown function orf19.11422          | 10822 IPF10180   | No significant S.c. match                                                                                              |
| CA1634 | 0.7 | 1.0 | 1.1 | 0.9 | IPF10179   | 6752178..6unknown function orf19.11421          | 10820 IPF10179   | UNCLASSImolecular_function unknown                                                                                     |
| CA1635 | 1.3 | 0.9 | 0.9 | 1.2 | URA7       | complemer CTP synthase 1 (by hc orf19.3941      | 10815 CaURA7     | Nucleotide ligase activity                                                                                             |
| CA1636 | 1.3 | 1.0 | 0.9 | 0.8 | IPF20086   | complemer unknown function orf19.3942           | 20086 IPF20086   | UNCLASSImolecular_function unknown                                                                                     |
| CA1637 | 0.4 | 0.5 | 0.5 | 0.8 | RPL43A.3   | complemer ribosomal protein, 3-prime end (by I  | 20087 CaRPL43A   | PROTEIN structural molecule activity                                                                                   |
| CA1638 | 1.1 | 0.8 | 1.0 | 1.0 | GRR1       | complemer Required for glucose r orf19.3944     | 14608 CaGRR1     | C-compou protein binding                                                                                               |
| CA1639 | 1.8 | 1.3 | 1.0 | 0.9 | IPF18641.1 | 6763994..6 unknown function, exo orf19.1733     | 18641 IPF18641.1 | UNCLASSIFIED PROTEINS                                                                                                  |
| CA1640 | 2.1 | 1.2 | 1.0 | 1.3 | IPF18641.1 | 6765639..6 unknown function, exo orf19.1732     | 18640 IPF18641.1 | UNCLASSIFIED PROTEINS                                                                                                  |
| CA1641 | 0.4 | 1.1 | 0.9 | 0.9 | NHP10.3F   | complemer unknown function, 3-pr orf19.1731     | 9350 CaNHP10.3   | CLASSIFICmolecular_function unknown                                                                                    |
| CA1642 | 1.0 | 1.0 | 0.9 | 1.0 | NHP1.5F    | complemer unknown function, 5-pr orf19.1730     | 9349 CaNHP1.5    | CLASSIFICATION NOT YET CLEAR-CUT                                                                                       |
| CA1643 | 0.6 | 1.1 | 1.0 | 0.8 | IPF9347    | 6769829..6 unknown function orf19.1729          | 9347 IPF9347     | No significant S.c. match                                                                                              |
| CA1644 | 1.0 | 1.0 | 0.9 | 1.2 | IPF9345    | complemer unknown function orf19.1728           | 9345 IPF9345     | No significant S.c. match                                                                                              |
| CA1645 | 2.1 | 2.7 | 1.5 | 1.5 | PMC1       | 6774913..6Ca2+-transporting P-ty orf19.1727     | 9340 CaPMC1      | CELLULAFtransporter activity                                                                                           |
| CA1646 | 0.8 | 1.1 | 1.1 | 1.1 | IPF9336.3F | complemer unknown function, 3-pr orf19.1725     | 9336 IPF9336.3   | No significant S.c. match                                                                                              |
| CA1647 | 1.1 | 1.0 | 1.1 | 1.1 | IPF16663   | 6783732..6unknown function orf19.5568           | 16663 IPF16663   | UNCLASSIprotein binding                                                                                                |
| CA1648 | 0.9 | 1.0 | 1.1 | 0.9 | IPF16662   | complemer unknown function orf19.5567           | 16662 IPF16662   | TRANSCR RNA binding                                                                                                    |
| CA1649 | 1.1 | 0.9 | 1.0 | 1.1 | LAB1       | 6785702..6Lipoate biosynthesis b orf19.5566     | 5392 CaLAB1      | UNCLASSImolecular_function unknown                                                                                     |
| CA1650 | 1.8 | 1.2 | 1.2 | 1.1 | IPF5389    | 6788276..63-hydroxyisobutyrate d orf19.5565     | 5389 IPF5389     | No significant S.c. match                                                                                              |
| CA1651 | 0.7 | 0.8 | 0.9 | 1.1 | RNH1.EXC   | complemer Ribonuclease H, exon orf19.5564       | 18639 CaRNH1.e   | Nucleotide metabolism CONTROL OF CELLULAR ORGANIZATION                                                                 |
| CA1652 | 0.7 | 0.8 | 0.9 | 1.0 | RNH1.EXC   | complemer Ribonuclease H, exon orf19.5563       | 5387 CaRNH1.e    | Nucleotide RNA binding                                                                                                 |
| CA1653 | 4.1 | 2.0 | 1.0 | 1.5 | STE23      | complemer protease involved in a- orf19.5561    | 5385 CaSTE23     | PROTEIN lpeptidase activity                                                                                            |
| CA1654 | 1.2 | 0.9 | 1.2 | 1.0 | IPF19660   | complemer unknown function orf19.5559           | 19661 IPF19660   | UNCLASSImolecular_function unknown                                                                                     |
| CA1655 | 1.8 | 1.2 | 1.0 | 1.2 | CCC2       | complemer putative copper-transp orf19.4328     | 12705 CaCCC2     | REGULATItransporter activity                                                                                           |
| CA1656 | 1.2 | 1.2 | 1.1 | 0.8 | IPF16019   | complemer unknown function orf19.4326           | 16019 IPF16019   | TRANSCR RNA binding                                                                                                    |
| CA1657 | 0.7 | 0.9 | 1.2 | 0.9 | IPF16022   | 6810308..6unknown function orf19.4325           | 16022 IPF16022   | UNCLASSIFIED PROTEINS                                                                                                  |
| CA1658 | 1.0 | 1.0 | 1.1 | 1.1 | IPF19924   | complemer unknown function orf19.4324           | 19924 IPF19924   | No significant S.c. match                                                                                              |
| CA1659 | 0.8 | 1.0 | 1.1 | 1.0 | IPF11054   | 6814609..6unknown function orf19.4323           | 11054 IPF11054   | UNCLASSImolecular_function unknown                                                                                     |
| CA1660 | 1.8 | 1.0 | 1.0 | 0.8 | DAP2       | complemer dipeptidyl aminopeptid orf19.4322     | 11053 CaDAP2     | PROTEIN lpeptidase activity                                                                                            |
| CA1662 | 0.3 | 1.0 | 0.5 | 0.8 | RPL28.3F   | 6820892..6Ribosomal protein, 3-prime end (by    | 7308 CaRPL28.3   | PROTEIN RNA binding                                                                                                    |
| CA1663 | 0.5 | 0.8 | 0.9 | 1.2 | IPF7309    | 6821859..6unknown function orf19.2864           | 7309 IPF7309     | UNCLASSImolecular_function unknown                                                                                     |
| CA1664 | 1.3 | 1.0 | 0.9 | 0.8 | ERV1.3     | 6823051..6Mitochondrial biogenesis and regula   | 7312 CaERV1.3    | CELL CYC oxidoreductase activity                                                                                       |
| CA1665 | 0.8 | 0.8 | 0.8 | 0.9 | RIB1       | 6826003..6GTP cyclohydrolase II orf19.2862      | 18635 CaRIB1     | Metabolismr hydrolase activity                                                                                         |
| CA1666 | 1.0 | 1.1 | 1.0 | 1.0 | SRP40      | 6827174..6RNA I and II supressor orf19.2859     | 19740 CaSRP40    | TRANSCR chaperone activity                                                                                             |
| CA1667 | 1.0 | 1.2 | 1.1 | 1.1 | SSL2       | 6828822..6by homology to S. cere orf19.2857     | 11402 CaSSL2     | CELL CYC DNA binding,helicase activity                                                                                 |
| CA1668 | 1.0 | 1.1 | 1.1 | 1.1 | IPF11396   | complemer unknown function orf19.2853           | 11396 IPF11396   | UNCLASSIFIED PROTEINS                                                                                                  |
| CA1669 | 0.7 | 1.0 | 0.8 | 1.0 | IPF11393   | 6832844..6unknown function orf19.2852           | 11393 IPF11393   | PROTEIN structural molecule activity                                                                                   |
| CA1670 | 1.0 | 0.9 | 0.9 | 1.1 | IPF11392   | 6834063..6unknown function orf19.2851           | 11392 IPF11392   | Amino acid metabolism CELLULAR TRANSPORT AND TRANSPORT MECHANISMS SUBCELLULAR LOCALISATION TRAN                        |
| CA1671 | 1.0 | 1.0 | 1.0 | 0.8 | IPF11391   | complemer unknown function                      | 11391 IPF11391   | No significant S.c. match                                                                                              |
| CA1672 | 0.9 | 1.2 | 0.9 | 1.3 | IPF5196    | complemer unknown function orf19.11094          | 5196 IPF5196     | No significant S.c. match                                                                                              |
| CA1673 | 0.8 | 0.7 | 0.7 | 0.8 | PST2       | 6840216..61,4-benzoquinone red orf19.3612       | 5195 CaPST2      | UNCLASSImolecular_function unknown                                                                                     |
| CA1674 | 0.7 | 1.1 | 0.9 | 1.1 | PAF1       | 6841165..6DNA-directed RNA pol orf19.3613       | 5194 CaPAF1      | TRANSCR transcription regulator activity                                                                               |
| CA1675 | 1.1 | 1.0 | 1.1 | 0.9 | IPF5192    | complemer unknown function orf19.3615           | 5192 IPF5192     | UNCLASSImolecular_function unknown                                                                                     |
| CA1676 | 0.9 | 1.0 | 1.0 | 1.2 | ERG9       | complemer farnesyl-diphosphate f orf19.3616     | 5191 CaERG9      | Lipid fatty-ε transferase activity                                                                                     |
| CA1677 | 0.9 | 0.9 | 1.0 | 0.9 | GTR1       | complemer GTP-binding protein by orf19.3617     | 5189 CaGTR1      | Phosphate hydrolase activity                                                                                           |
| CA1678 | 1.8 | 1.1 | 1.3 | 1.1 | IPF5185    | complemer putative cell wall protei orf19.3618  | 5185 IPF5185     | SUBCELLULAR LOCALISATION                                                                                               |
| CA1679 | 0.5 | 1.0 | 1.0 | 1.1 | IPF5180.3F | complemer unknown function, 3-prime end         | 18631 IPF5180.3  | No significant S.c. match                                                                                              |
| CA1680 | 1.3 | 0.9 | 0.6 | 1.1 | IPF15649   | complemer unknown function orf19.4913           | 15649 IPF15649   | UNCLASSImolecular_function unknown                                                                                     |
| CA1681 | 0.8 | 0.9 | 0.9 | 1.0 | IPF12676   | 6863796..6unknown function orf19.4914           | 12676 IPF12676   | No significmolecular_function unknown                                                                                  |
| CA1682 | 1.5 | 1.3 | 1.1 | 1.0 | CIRT3      | complemer Putative transposase orf19.4918       | 18629 CaCirt3    | No significant S.c. match                                                                                              |
| CA1683 | 0.5 | 1.0 | 0.9 | 0.9 | CIRT       | 6871560..6Probable transposase orf19.4919       | 18628 CaCirt     | No significant S.c. match                                                                                              |
| CA1684 | 1.3 | 0.9 | 1.0 | 0.7 | IPF6070    | 6873866..6unknown function orf19.4921           | 6070 IPF6070     | No significant S.c. match                                                                                              |
| CA1685 | 1.4 | 0.9 | 0.9 | 0.8 | IPF12270   | 6878314..6unknown function orf19.3660           | 12270 IPF12270   | No significant S.c. match                                                                                              |
| CA1686 | 1.2 | 1.1 | 0.6 | 1.2 | IPF12272   | complemer unknown function orf19.3659           | 12272 IPF12272   | UNCLASSImolecular_function unknown                                                                                     |
| CA1687 | 1.0 | 1.1 | 0.9 | 1.0 | IPF12275   | 6880909..6unknown function orf19.3658           | 12275 IPF12275   | UNCLASSImolecular_function unknown                                                                                     |
| CA1688 | 1.0 | 1.1 | 1.1 | 0.9 | COX15      | complemer cytochrome oxidase as orf19.3656      | 13028 CaCOX15    | ENERGY " molecular_function unknown                                                                                    |
| CA1689 | 1.0 | 0.9 | 1.0 | 1.1 | IPF13030   | 6884979..6unknown function orf19.3655           | 13030 IPF13030   | No significant S.c. match                                                                                              |
| CA1690 | 0.8 | 0.9 | 0.9 | 0.9 | FAT1       | 6888232..6very long-chain fatty ac orf19.3653   | 13033 CaFAT1     | Lipid fatty-ε ligase activity,transporter activity                                                                     |
| CA1691 | 0.5 | 1.0 | 0.8 | 0.7 | PGK1       | complemer Phosphoglycerate kina orf19.3651      | 17009 CaPGK1     | C-compou transferase activity                                                                                          |
| CA1692 | 0.8 | 0.8 | 0.9 | 1.0 | IPF17055.3 | 6893728..6unknown function, 3-pr orf19.5036     | 17055 IPF17055.3 | UNCLASSItransporter activity                                                                                           |
| CA1693 | 1.3 | 0.8 | 1.1 | 1.0 | IPF17054   | complemer unknown function orf19.5037           | 17054 IPF17054   | No significant S.c. match                                                                                              |
| CA1694 | 0.9 | 1.1 | 1.0 | 1.0 | TRM3       | 6897030..62-O-ribose methyltran orf19.5038      | 12305 CaTRM3     | TRANSCR transferase activity                                                                                           |
| CA1695 | 1.1 | 1.0 | 1.0 | 1.1 | RRP42      | complemer rRNA processing prote orf19.5039      | 12306 CaRRP42    | TRANSCR RNA binding                                                                                                    |
| CA1696 | 0.9 | 1.0 | 1.1 | 1.2 | ASM4       | 6903004..6similar to Saccharmoy orf19.5040      | 12310 CaASM4     | CELL CYC structural molecule activity                                                                                  |
| CA1697 | 0.9 | 0.8 | 1.1 | 1.1 | IPF16758   | 6907195..6unknown function orf19.5043           | 16758 IPF16758   | CELLULAR TRANSPORT AND TRANSPORT MECHANISMS SUBCELLULAR LOCALISATION                                                   |
| CA1698 | 1.0 | 1.1 | 1.1 | 1.1 | IPF15681   | 6911160..6unknown function orf19.5045           | 15681 IPF15681   | No significant S.c. match                                                                                              |
| CA1699 | 0.1 | 0.9 | 0.8 | 0.8 | RAM1.3F    | complemer protein farnesyltransferase, beta sut | 19535 CaRAM1.3   | Lipid fatty-acid and isoprenoid metabolism """"PROTEIN FATE [folding modification destination] ""CELLULAR COMMUNICATIO |

|        |     |     |     |     |            |                                                  |                  |                                                                                |
|--------|-----|-----|-----|-----|------------|--------------------------------------------------|------------------|--------------------------------------------------------------------------------|
| CA1700 | 1.2 | 0.9 | 1.0 | 0.9 | RAM1.5F    | complemer protein farnesyltransferase orf19.5046 | 19534 CaRAM1.5   | Lipid fatty-ε transferase activity                                             |
| CA1701 | 1.3 | 0.9 | 1.0 | 0.8 | CFL11      | 6919083..6 Ferric reductase (by h orf19.701      | 7992 CaCFL11     | REGULATION OF/INTERACTION WITH CELLULAR ENVIRONMENT Other virulence attributes |
| CA1702 | 1.2 | 1.0 | 1.3 | 1.0 | HEL1       | complemer DNA helicase I (by hor orf19.702       | 7990 CaHEL1      | CELL CYC DNA binding,helicase activity,RNA binding                             |
| CA1703 | 1.2 | 1.1 | 1.0 | 0.8 | IPF7987    | complemer unknown function orf19.703             | 7987 IPF7987     | UNCLASSI hydrolase activity                                                    |
| CA1704 | 0.5 | 0.9 | 1.0 | 1.0 | SOL3       | complemer weak multicopy suppre orf19.704        | 19927 CaSOL3     | TRANSCR molecular_function unknown                                             |
| CA1705 | 1.0 | 1.0 | 1.3 | 1.0 | GCN5       | complemer Histone acetyltransferase orf19.705    | 7983 CaGCN5      | CELL CYC transferase activity                                                  |
| CA1706 | 1.9 | 1.1 | 1.1 | 1.0 | NMD3       | 6928772..6 RNA binding (by homo orf19.706        | 7981 CaNMD3      | TRANSCR protein binding,RNA binding                                            |
| CA1708 | 0.7 | 1.3 | 1.2 | 1.0 | IPF7543    | 6936155..6 unknown function orf19.4888           | 7543 IPF7543     | No significant S.c. match                                                      |
| CA1709 | 0.7 | 0.7 | 0.9 | 1.1 | HOL2       | complemer Multidrug-resistance prorf19.4889      | 7544 CaHOL2      | CELL RES transporter activity                                                  |
| CA1710 | 1.2 | 0.9 | 0.9 | 1.2 | CLA4       | complemer protein kinase homolog orf19.4890      | 16297 CaCLA4     | CELL CYC protein kinase activity                                               |
| CA1711 | 1.1 | 0.9 | 0.9 | 1.1 | POX18      | complemer Lipid-transfer protein (l orf19.10841  | 17142 CaPOX18    | No significant S.c. match                                                      |
| CA1712 | 1.2 | 1.2 | 1.1 | 1.0 | ABC1       | 6950284..6 ubiquinol-cytochrome- orf19.10842     | 14939 CaABC1     | ENERGY " chaperone activity                                                    |
| CA1713 | 1.2 | 1.3 | 1.2 | 1.1 | IPF19743   | 6952488..6 unknown function orf19.3332           | 19743 IPF19743   | UNCLASSI molecular_function unknown                                            |
| CA1714 | 0.7 | 1.1 | 0.9 | 1.0 | NAB2       | 6955882..6 Nuclear poly(A)-RNA-t orf19.3333      | 14410 CaNAB2     | TRANSCR RNA binding                                                            |
| CA1715 | 0.3 | 0.3 | 0.4 | 0.8 | RPS21      | complemer ribosomal protein (by h orf19.3334     | 14407 CaRPS21    | PROTEIN † structural molecule activity                                         |
| CA1716 | 0.5 | 2.4 | 0.7 | 1.4 | IPF17237   | 6959696..6 unknown function orf19.3335           | 17237 IPF17237   | No significant S.c. match                                                      |
| CA1717 | 0.7 | 0.7 | 0.7 | 0.9 | IPF9315    | complemer putative CCAAT-bindin orf19.4647       | 9315 IPF9315     | TRANSCRIPTION SUBCELLULAR LOCALISATION                                         |
| CA1718 | 1.1 | 0.9 | 1.3 | 0.9 | IPF9312    | complemer unknown function orf19.4649            | 9312 IPF9312     | TRANSCRIPTION SUBCELLULAR LOCALISATION                                         |
| CA1719 | 0.8 | 0.7 | 0.9 | 0.9 | ILV6       | complemer acetolactate synthase, orf19.12119     | 9306 CaILV6      | Amino acid enzyme regulator activity                                           |
| CA1720 | 0.3 | 1.1 | 0.8 | 1.1 | IPF15581   | complemer unknown function orf19.12120           | 15581 IPF15581   | No significant S.c. match                                                      |
| CA1722 | 1.0 | 1.0 | 0.9 | 1.0 | TEF41      | 6987263..6 Probable translation el orf19.2652    | 16861 CaTEF41    | PROTEIN SYNTHESIS SUBCELLULAR LOCALISATION                                     |
| CA1723 | 1.0 | 0.8 | 1.3 | 1.3 | TEF4       | 6988340..6 translation elongation f orf19.2651   | 16860 CaTEF4     | PROTEIN † translation regulator activity                                       |
| CA1724 | 0.8 | 0.9 | 0.9 | 1.0 | MRP10      | complemer Mitochondrial ribosomal protein (by l  | 18618 CaMRP10    | PROTEIN † structural molecule activity                                         |
| CA1725 | 1.0 | 0.9 | 0.9 | 1.1 | IPF15985   | complemer unknown function orf19.2650            | 15985 IPF15985   | No significant S.c. match                                                      |
| CA1726 | 0.8 | 1.0 | 1.1 | 1.1 | IPF13021   | complemer unknown function orf19.2647            | 13021 IPF13021   | TRANSCRIPTION SUBCELLULAR LOCALISATION                                         |
| CA1727 | 1.4 | 1.0 | 0.8 | 0.8 | IPF8448    | complemer unknown function orf19.13846           | 8448 IPF8448     | No significant S.c. match                                                      |
| CA1728 | 1.2 | 1.1 | 1.1 | 1.2 | WHI3       | complemer Putative RNA binding f orf19.6494      | 8447 CaWHI3      | CELL FATIRNA binding                                                           |
| CA1729 | 0.6 | 1.1 | 0.9 | 1.1 | IPF8440    | 7008772..7 similar to Saccharomy orf19.6496      | 8440 IPF8440     | CELLULAF molecular_function unknown                                            |
| CA1730 | 1.2 | 1.0 | 0.9 | 1.0 | IPF8439    | 7009648..7 unknown function orf19.6498           | 8439 IPF8439     | UNCLASSI molecular_function unknown                                            |
| CA1731 | 1.6 | 1.0 | 1.0 | 0.8 | IPF8437    | complemer putative DNA-directed orf19.6499       | 8437 IPF8437     | CELL CYCLE AND DNA PROCESSING SUBCELLULAR LOCALISATION                         |
| CA1732 | 1.5 | 1.0 | 1.1 | 0.9 | ECM42      | 7014851..7 Acetylornithine acetyltr orf19.6500   | 3933 CaECM42     | Amino acid transferase activity                                                |
| CA1733 | 0.9 | 1.0 | 1.4 | 1.0 | IPF3931    | complemer Unknown function orf19.13854           | 3931 IPF3931     | UNCLASSIFIED PROTEINS                                                          |
| CA1734 | 0.6 | 1.0 | 1.0 | 1.0 | IPF4988    | complemer unknown function orf19.2529            | 4988 IPF4988     | No significant S.c. match                                                      |
| CA1735 | 1.0 | 1.2 | 1.1 | 1.1 | IPF4986    | complemer similar to Saccharomy orf19.2528       | 4986 IPF4986     | TRANSCR transcription regulator activity                                       |
| CA1736 | 0.7 | 0.9 | 0.9 | 1.0 | IPF4983    | 7024104..7 unknown function orf19.2527           | 4983 IPF4983     | UNCLASSI molecular_function unknown                                            |
| CA1737 | 0.5 | 1.2 | 1.0 | 1.0 | LYS12      | complemer homo-isocitrate dehydr orf19.2525      | 4979 CaLYS12     | Amino acid oxidoreductase activity                                             |
| CA1738 | 0.7 | 1.2 | 0.9 | 1.2 | MGE1       | complemer heat shock protein (by orf19.2524      | 4977 CaMGE1      | PROTEIN † chaperone activity                                                   |
| CA1739 | 1.0 | 0.8 | 1.1 | 1.1 | IPF4976    | complemer unknown function orf19.10057           | 4976 IPF4976     | No significant S.c. match                                                      |
| CA1740 | 1.4 | 1.5 | 1.2 | 1.1 | SMI1       | 7034065..7 beta-1,3-glucan synthe orf19.5058     | 12215 CaSMI1     | C-compour molecular_function unknown                                           |
| CA1741 | 0.8 | 1.3 | 1.0 | 1.2 | IPF12213   | complemer unknown function orf19.5057            | 12213 IPF12213   | No significant S.c. match                                                      |
| CA1742 | 0.9 | 0.9 | 1.0 | 1.1 | IPF12210   | complemer quinolinate phosphorib orf19.5054      | 12210 IPF12210   | Metabolism transferase activity                                                |
| CA1743 | 0.7 | 0.7 | 0.9 | 1.0 | IPF12209   | 7040457..7 similar to Saccharomy orf19.5053      | 12209 IPF12209   | CELL CYC transferase activity                                                  |
| CA1744 | 0.7 | 0.8 | 1.0 | 1.0 | IPF10889   | complemer unknown function orf19.5052            | 10889 IPF10889   | TRANSPO transporter activity                                                   |
| CA1745 | 0.9 | 1.1 | 1.0 | 1.0 | IPF10888   | 7042767..7 unknown function orf19.5051           | 10888 IPF10888   | No significant S.c. match                                                      |
| CA1746 | 1.2 | 1.1 | 0.9 | 0.9 | IPF10886   | complemer unknown function orf19.5050            | 10886 IPF10886   | PROTEIN † molecular_function unknown                                           |
| CA1747 | 0.6 | 1.0 | 1.1 | 1.1 | IPF10884   | 7047421..7 unknown function orf19.5049           | 10884 IPF10884   | UNCLASSI molecular_function unknown                                            |
| CA1748 | 1.2 | 0.9 | 0.9 | 0.9 | IPF8257    | 7052065..7 unknown function orf19.1522           | 8257 IPF8257     | No significant S.c. match                                                      |
| CA1749 | 1.0 | 0.8 | 0.9 | 1.0 | IPF8257.3f | 7055194..7 unknown function, 3-prime end         | 8253 IPF8257.3f  | No significant S.c. match                                                      |
| CA1750 | 1.4 | 1.1 | 1.0 | 0.7 | IPF8252    | complemer unknown function orf19.1519            | 8252 IPF8252     | CELL CYCLE AND DNA PROCESSING SUBCELLULAR LOCALISATION                         |
| CA1751 | 1.2 | 1.1 | 1.0 | 0.7 | ARO3.EXC   | complemer 3-deoxy-D-arabinohep orf19.1517        | 8248 CaARO3.e    | Amino acid transferase activity                                                |
| CA1752 | 1.0 | 0.8 | 1.0 | 0.9 | UBP14      | complemer Ubiquitin-specific prote orf19.1516    | 8246 CaUBP14     | Lipid fatty-ε peptidase activity                                               |
| CA1753 | 1.3 | 0.9 | 1.1 | 0.9 | IPF8245    | 7064004..7 putative chitinase orf19.1515         | 8245 IPF8245     | C-compour molecular_function unknown                                           |
| CA1754 | 1.6 | 1.1 | 0.9 | 1.1 | IPF16320   | 7068168..7 Unknown function orf19.5131           | 16320 IPF16320   | UNCLASSI molecular_function unknown                                            |
| CA1755 | 0.7 | 0.5 | 0.5 | 1.0 | PD11       | complemer protein disulfide-isome orf19.5130     | 16217 CaPD11     | Lipid fatty-ε oxidoreductase activity,isomerase activity                       |
| CA1756 | 1.0 | 1.2 | 1.2 | 1.0 | IPF14562   | complemer unknown function orf19.5129            | 14562 IPF14562   | No significant S.c. match                                                      |
| CA1757 | 1.1 | 1.1 | 1.1 | 1.0 | IPF14559.ε | 7075780..7 unknown function, 5-pr orf19.5128     | 14559 IPF14559.ε | No significant S.c. match                                                      |
| CA1758 | 1.3 | 1.1 | 0.8 | 1.0 | IPF14559.ζ | 7076649..7 unknown function, 3-pr orf19.5126     | 14556 IPF14559.ζ | TRANSCR RNA binding                                                            |
| CA1759 | 3.1 |     | 2.4 | 1.3 | IPF14744   | complemer unknown function orf19.5125            | 14744 IPF14744   | UNCLASSI molecular_function unknown                                            |
| CA1760 | 0.7 | 1.0 | 1.1 | 0.9 | IPF17914.ζ | complemer unknown function orf19.5124            | 17914 IPF17914.ζ | CONTROL OF CELLULAR ORGANIZATION                                               |
| CA1761 | 0.8 | 1.1 | 0.7 | 1.0 | IPF7602    | 7085435..7 oxidoreductase (by hor orf19.5193     | 7602 IPF7602     | Lipid fatty-acid and isoprenoid metabolism                                     |
| CA1762 | 0.6 | 1.1 | 0.9 | 0.8 | IPF20014   | 7086420..7 oxidoreductase by homology            | 19928 IPF20014   | Lipid fatty-ε molecular_function unknown                                       |
| CA1763 | 0.7 | 1.0 | 1.0 | 1.0 | URA6       | 7087454..7 Uridine-monophosphat orf19.5195       | 7599 CaURA6      | Nucleotide transferase activity                                                |
| CA1764 | 0.8 | 0.9 | 0.8 | 1.0 | IPF7596    | 7088486..7 similar to Saccharomy orf19.5196      | 7596 IPF7596     | TRANSCR isomerase activity                                                     |
| CA1765 | 1.4 | 1.1 | 1.0 | 1.0 | APE2       | 7089585..7 aminopeptidase yscII orf19.5197       | 7593 CaAPE2      | Amino acid peptidase activity                                                  |
| CA1766 | 1.3 | 0.9 | 1.2 | 1.2 | NOP4       | 7092793..7 Nucleolar protein orf19.5198          | 7589 CaNOP4      | TRANSCR RNA binding                                                            |
| CA1767 | 1.2 | 1.0 | 1.2 | 1.1 | SIT4       | complemer Ser/thr protein phosph orf19.5200      | 7586 CaSIT4      | CELL CYC protein phosphatase activity                                          |
| CA1768 | 1.0 | 0.9 | 0.9 | 1.2 | IPF7585    | 7096998..7 unknown function orf19.5201           | 7585 IPF7585     | PROTEIN † structural molecule activity                                         |
| CA1769 | 1.0 | 1.0 | 1.0 | 1.0 | IPF7581    | 7099629..7 unknown function orf19.5203           | 19744 IPF7581    | No significant S.c. match                                                      |
| CA1770 | 0.9 | 0.9 | 0.9 | 1.0 | IPF12457   | 7104740..7 unknown function orf19.2185           | 12457 IPF12457   | UNCLASSI molecular_function unknown                                            |
| CA1771 | 0.6 | 1.1 | 0.9 | 1.1 | SEH1       | complemer nuclear pore protein (b orf19.2186     | 12458 CaSEH1     | CELLULAF structural molecule activity                                          |
| CA1772 | 1.2 | 0.9 | 1.0 | 1.0 | ALG7       | 7107522..7 UDP-N-acetylglucosan orf19.2187       | 12460 CaALG7     | Phosphate transferase activity                                                 |



|        |     |     |     |     |            |                                               |                 |                                                                                                      |
|--------|-----|-----|-----|-----|------------|-----------------------------------------------|-----------------|------------------------------------------------------------------------------------------------------|
| CA1773 | 0.8 | 0.8 | 0.9 | 1.0 | VRP1       | 7109211..7.verprolin (by homology orf19.2190  | 12461 CaVRP1    | CELLULAF protein binding                                                                             |
| CA1774 | 0.9 | 1.1 | 1.0 | 1.1 | IPF7498    | complemer unknown function orf19.2191         | 7498 IPF7498    | UNCLASSI molecular_function unknown                                                                  |
| CA1775 | 3.2 | 2.2 | 2.1 | 1.1 | GDH2       | complemer NAD-specific glutamato orf19.9738   | 19745 CaGDH2    | Amino acid oxidoreductase activity                                                                   |
| CA1776 | 1.0 | 0.8 |     | 1.0 | IPF14704   | complemer unknown function orf19.1823         | 14704 IPF14704  | UNCLASSIFIED PROTEINS                                                                                |
| CA1777 | 0.8 | 0.9 |     | 1.1 | IPF14706   | complemer unknown function orf19.1824         | 14706 IPF14706  | No significant S.c. match                                                                            |
| CA1778 | 0.9 | 0.8 | 1.3 | 1.1 | IPF13810   | complemer unknown function, 3-pr orf19.1825   | 13810 IPF13810  | No significant S.c. match                                                                            |
| CA1779 | 1.6 | 0.8 | 1.1 | 1.2 | IPF14510   | 7131977..7 unknown function orf19.1826        | 14510 IPF14510  | UNCLASSI molecular_function unknown                                                                  |
| CA1780 | 1.0 | 1.0 | 0.9 | 1.0 | IPF14509   | 7134782..7 unknown function orf19.1827        | 14509 IPF14509  | UNCLASSIFIED PROTEINS                                                                                |
| CA1781 | 1.2 | 0.9 | 0.9 | 1.1 | IPF14508   | complemer unknown function orf19.1828         | 14508 IPF14508  | UNCLASSI molecular_function unknown                                                                  |
| CA1782 | 2.8 | 3.4 | 2.6 | 2.0 | PHO84.3E   | 7138851..7 Inorganic phosphate tr orf19.1172  | 7638 CaPHO84    | .Phosphate transporter activity                                                                      |
| CA1783 | 1.1 | 1.0 | 0.9 | 1.1 | IPF7635    | complemer unknown function orf19.1171         | 7635 IPF7635    | No significant S.c. match                                                                            |
| CA1784 | 1.4 | 0.9 | 0.9 | 1.0 | ARO7       | complemer chorismate mutase (by orf19.1170    | 7632 CaARO7     | Amino acid isomerase activity                                                                        |
| CA1785 | 0.9 | 0.9 | 1.1 | 0.9 | IPF7631    | complemer unknown function orf19.1169         | 7631 IPF7631    | UNCLASSI molecular_function unknown                                                                  |
| CA1786 | 0.9 | 1.0 | 0.9 | 1.1 | IPF7629    | complemer unknown function orf19.1168         | 7629 IPF7629    | No significant S.c. match                                                                            |
| CA1787 | 0.9 | 0.8 | 0.9 | 1.0 | IFH3       | complemer Dioxxygenase (by homc orf19.1167    | 19929 CaIFH3    | CELL RES oxidoreductase activity                                                                     |
| CA1788 | 0.8 | 0.8 | 1.1 | 0.8 | USO1.3     | complemer Cytoskeletal-related tr orf19.1166  | 7623 CaUSO1.3   | UNCLASSI molecular_function unknown                                                                  |
| CA1789 | 0.9 | 0.8 | 1.2 | 1.0 | GAR1       | 7154269..7 Nucleolar rRNA proces orf19.1164   | 7621 CaGAR1     | TRANSCR RNA binding                                                                                  |
| CA1790 | 1.4 | 1.1 | 1.1 | 0.8 | IPF13971   | 7156384..7 unknown function orf19.5204        | 13971 IPF13971  | UNCLASSI molecular_function unknown                                                                  |
| CA1791 | 0.8 | 1.1 |     | 1.1 | IPF13967   | 7158856..7 unknown function orf19.5205        | 13967 IPF13967  | UNCLASSIFIED PROTEINS                                                                                |
| CA1792 | 1.1 | 1.2 | 1.0 | 0.8 | IPF13966   | complemer unknown function orf19.5206         | 13966 IPF13966  | UNCLASSI molecular_function unknown                                                                  |
| CA1793 | 1.1 | 1.1 | 1.1 | 1.0 | IPF18608   | 7162049..7 unknown function, 5-pr orf19.5207  | 18608 IPF18608  | CLASSIFICATION NOT YET CLEAR-CUT                                                                     |
| CA1794 | 1.0 | 0.9 | 1.2 | 1.1 | IPF18608   | 7162608..7 unknown function, 3-pr orf19.5208  | 11262 IPF18608  | CLASSIFIC molecular_function unknown                                                                 |
| CA1795 | 0.8 | 1.1 | 1.0 | 0.8 | IPF11261   | complemer unknown function orf19.5209         | 11261 IPF11261  | UNCLASSI molecular_function unknown                                                                  |
| CA1796 | 1.0 | 0.9 | 1.2 | 1.3 | IPF11259   | complemer unknown function orf19.5210         | 11259 IPF11259  | TRANSCR DNA binding,transcription regulator activity                                                 |
| CA1797 | 1.0 | 1.1 | 0.9 | 1.1 | NUM12      | 7171839..7 nuclear migration prote orf19.2924 | 15988 CaNUM12   | CELL CYCLE AND DNA PROCESSING                                                                        |
| CA1798 | 0.7 | 1.1 | 1.2 | 1.0 | IPF11448   | complemer unknown function orf19.2923         | 11448 IPF11448  | UNCLASSIFIED PROTEINS                                                                                |
| CA1799 | 0.9 | 0.8 | 1.0 | 1.0 | IPF11446   | complemer unknown function orf19.2922         | 11446 IPF11446  | No significant S.c. match                                                                            |
| CA1800 | 0.7 | 1.0 | 1.2 | 1.0 | IPF11445   | 7179826..7 similar to Saccharomy orf19.2921   | 11445 IPF11445  | CELL CYC chaperone activity                                                                          |
| CA1801 | 0.8 | 0.8 | 0.9 | 0.9 | IPF11444   | complemer unknown function orf19.2920         | 11444 IPF11444  | UNCLASSIRNA binding                                                                                  |
| CA1802 | 0.9 | 1.0 | 1.1 | 0.9 | IPF11443   | complemer unknown function orf19.2919         | 11443 IPF11443  | CELL CYC RNA binding,helicase activity                                                               |
| CA1803 | 1.1 | 1.0 | 7.4 | 1.1 | IPF16748   | complemer unknown function orf19.2917         | 16748 IPF16748  | CELLULAF molecular_function unknown                                                                  |
| CA1804 | 1.1 | 0.8 | 0.9 | 1.0 | TAF17      | 7190946..7 TFIID and SAGA subu orf19.1111     | 6333 CaTAF17    | TRANSCR transcription regulator activity                                                             |
| CA1805 | 1.0 | 1.0 |     | 0.8 | IPF6332    | 7191994..7 similar to Saccharomy orf19.1112   | 6332 IPF6332    | C-compour molecular_function unknown                                                                 |
| CA1806 | 0.8 | 0.7 |     | 0.9 | IPF6329    | 7194761..7 unknown function orf19.1113        | 6329 IPF6329    | No significant S.c. match                                                                            |
| CA1807 | 1.3 | 1.0 | 0.9 | 0.9 | IPF6328    | complemer unknown function orf19.1114         | 6328 IPF6328    | UNCLASSI molecular_function unknown                                                                  |
| CA1808 | 0.8 | 0.9 | 1.0 | 1.2 | GUK1       | complemer Guanylate kinase (by h orf19.1115   | 6326 CaGUK1     | Nucleotide transferase activity                                                                      |
| CA1809 | 1.2 | 1.0 | 1.0 | 0.8 | IPF6325    | 7198001..7 unknown function orf19.1116        | 6325 IPF6325    | No significant S.c. match                                                                            |
| CA1810 | 1.3 | 0.9 | 0.9 | 1.2 | FDH2       | 7199805..7 Formate dehydrogena: orf19.1117    | 6323 CaFDH2     | ENERGY                                                                                               |
| CA1811 | 0.9 | 1.1 | 0.9 | 1.1 | MTR10      | 7201350..7 Involved in nuclear pro orf19.1119 | 6321 CaMTR10    | TRANSCRIPTION CELLULAR TRANSPORT AND TRANSPORT MECHANISMS SUBCELLULAR LOCALISATION                   |
| CA1812 | 0.8 | 1.0 | 0.9 | 0.8 | IPF13879   | complemer unknown function orf19.1120         | 13879 IPF13879  | No significant S.c. match                                                                            |
| CA1814 | 1.6 | 1.1 | 1.0 | 0.8 | TRA1.5EO   | complemer ATM/Mec1/TOR1+2-re orf19.139        | 14787 CaTRA1.5e | TRANSCRIPTION                                                                                        |
| CA1815 | 0.5 | 1.0 | 0.9 | 1.0 | IPF18606   | complemer unknown function orf19.138          | 18606 IPF18606  | CELL FATI molecular_function unknown                                                                 |
| CA1816 | 2.0 | 1.1 | 1.1 | 0.9 | IPF7020    | 7219916..7 unknown function orf19.136         | 7020 IPF7020    | CELL RES molecular_function unknown                                                                  |
| CA1817 | 1.1 | 1.1 | 0.8 | 1.2 | IPF7021    | complemer similar to Saccharomy orf19.135     | 7021 IPF7021    | CELLULAF molecular_function unknown                                                                  |
| CA1818 | 1.8 | 1.5 | 1.0 | 0.8 | IPF7023.3  | complemer unknown function, 3-pr orf19.134    | 7023 IPF7023.3  | No significant S.c. match                                                                            |
| CA1819 | 0.9 | 1.0 | 1.0 | 1.1 | IPF16549   | 7233471..7 Unknown function orf19.4273        | 16549 IPF16549  | TRANSCR molecular_function unknown                                                                   |
| CA1820 | 1.3 | 0.9 | 1.0 | 0.9 | IPF9529    | complemer probable mannosyltran orf19.4270    | 9529 IPF9529    | C-compound and carbohydrate metabolism ""PROTEIN FATE [folding modification destination] ""          |
| CA1821 | 1.5 | 1.0 |     | 1.1 | IPF9527    | 7240345..7 unknown function orf19.4269        | 9527 IPF9527    | UNCLASSIFIED PROTEINS                                                                                |
| CA1822 | 1.2 | 1.1 | 1.3 | 0.9 | IPF9525    | 7242308..7 unknown function orf19.4268        | 9525 IPF9525    | UNCLASSIRNA binding                                                                                  |
| CA1823 | 1.0 | 0.9 | 1.0 | 1.0 | IPF9522.5f | 7244770..7 septin, 5-prime end (by orf19.4267 | 9524 IPF9522.5f | C-compound and carbohydrate metabolism CELL CYCLE AND DNA PROCESSING CELL FATE SUBCELLULAR LOCALISAT |
| CA1825 | 0.8 | 1.1 | 1.2 | 0.9 | IPF9522.3f | 7245596..7 septin, 3-prime end (by orf19.4266 | 9522 IPF9522.3f | CELL CYCLE AND DNA PROCESSING CELL FATE SUBCELLULAR LOCALISATION                                     |
| CA1826 | 0.6 | 0.8 | 0.9 | 1.0 | UAP1       | complemer UDP-N-acetylglucosan orf19.4265     | 9521 CaUAP1     | CONTROL nucleotidyltransferase activity                                                              |
| CA1827 | 1.0 | 0.9 | 1.1 | 1.1 | IPF9520    | complemer unknown function orf19.11740        | 9520 IPF9520    | No significant S.c. match                                                                            |
| CA1828 | 1.0 | 1.1 | 0.8 | 1.0 | CDC22.3E   | 7252360..7 DNA Polymerase III, 3-prime end    | 17179 CaCDC22   | CELL CYCLE AND DNA PROCESSING SUBCELLULAR LOCALISATION                                               |
| CA1829 | 0.9 | 0.7 | 1.2 | 1.1 | IPF17177   | complemer similar to Saccharomy orf19.5184    | 17178 IPF17177  | TRANSCR signal transducer activity                                                                   |
| CA1830 | 1.2 | 1.4 |     | 1.1 | IPF17177   | complemer similar to Saccharomy orf19.5185    | 17177 IPF17177  | TRANSCRIPTION CELLULAR TRANSPORT AND TRANSPORT MECHANISMS CELL FATE SUBCELLULAR LOCALISATION         |
| CA1831 | 0.8 | 0.9 | 1.1 | 0.8 | CHS1       | complemer Chitin synthase (by hc orf19.5188   | 6129 CaCHS1     | C-compour transferase activity                                                                       |
| CA1832 | 0.7 | 1.1 | 1.2 | 1.0 | IPF17727   | complemer unknown function orf19.5190         | 17727 IPF17727  | CELL CYCLE AND DNA PROCESSING CELLULAR TRANSPORT AND TRANSPORT MECHANISMS CELL FATE SUBCELL          |
| CA1834 | 1.9 | 1.5 | 1.9 | 1.1 | PFK1       | complemer 6-phosphofructokinase orf19.3967    | 5769 CaPFK1     | C-compour transferase activity                                                                       |
| CA1835 | 0.9 | 0.9 | 1.0 | 1.2 | CRH12      | complemer Cell wall protein (by ho orf19.3966 | 5772 CaCRH12    | SUBCELLULAR LOCALISATION                                                                             |
| CA1836 | 0.8 | 0.9 | 1.0 | 0.9 | IPF5773    | 7279135..7 unknown function orf19.3965        | 5773 IPF5773    | No significant S.c. match                                                                            |
| CA1837 | 0.9 | 0.8 | 1.2 | 1.1 | IPF5776    | complemer ash2-trithorax family pr orf19.3964 | 5776 IPF5776    | UNCLASSI transcription regulator activity                                                            |
| CA1838 | 0.9 | 1.1 | 1.0 | 1.0 | IPF5777    | complemer unknown function orf19.3963         | 5777 IPF5777    | UNCLASSI molecular_function unknown                                                                  |
| CA1839 | 1.3 | 1.1 | 1.2 | 1.1 | IPF4435    | 7284774..7 unknown function orf19.4711        | 4435 IPF4435    | UNCLASSI molecular_function unknown                                                                  |
| CA1840 | 1.0 | 1.3 | 1.0 | 1.3 | IFP3       | complemer Unknown Function orf19.4707         | 4440 CaIFP3     | No significant S.c. match                                                                            |
| CA1841 | 1.1 | 1.0 | 1.5 | 1.0 | CCA1       | 7291739..7 tRNA nucleotidyltransf orf19.4705  | 4444 CaCCA1     | TRANSCR nucleotidyltransferase activity                                                              |
| CA1842 | 1.6 | 1.1 | 1.1 | 1.0 | ARO1       | 7293668..7 arom pentafunctional e orf19.4704  | 4446 CaARO1     | Amino acid transferase activity                                                                      |
| CA1843 | 1.4 | 1.0 | 1.0 | 1.0 | IPF11364   | complemer unknown function orf19.635          | 11384 IPF11364  | No significant S.c. match                                                                            |
| CA1844 | 0.7 | 1.0 | 0.9 | 1.0 | IFL5.3     | complemer unknown function, 3-pr orf19.654    | 19930 CaIFL5.3  | CELL RESCUE DEFENSE AND VIRULENCE ""CELL FATE                                                        |
| CA1845 | 2.1 | 1.3 | 1.3 | 0.8 | IPF11123   | 7311134..7 similar to Saccharomy orf19.637    | 11123 IPF11123  | ENERGY oxidoreductase activity                                                                       |
| CA1846 | 2.4 | 1.4 | 1.3 | 1.6 | FDH12      | 7313358..7 Formate dehydrogena: orf19.638     | 11124 CaFDH12   | ENERGY oxidoreductase activity                                                                       |

|        |     |     |     |     |            |                                               |             |       |            |                                                                                                         |
|--------|-----|-----|-----|-----|------------|-----------------------------------------------|-------------|-------|------------|---------------------------------------------------------------------------------------------------------|
| CA1847 | 1.1 | 0.9 | 1.1 | 0.8 | IPF11127   | 7314688..7 unknown function                   | orf19.639   | 11127 | IPF11127   | UNCLASSIFIED PROTEINS                                                                                   |
| CA1848 | 1.5 | 1.1 | 1.0 | 0.8 | IPF11128   | complemer unknown function                    |             | 11128 | IPF11128   | PROTEIN †structural molecule activity                                                                   |
| CA1849 | 0.6 | 1.1 | 0.9 | 0.9 | IPF19932   | complemer unknown function                    | orf19.640   | 19932 | IPF19932   | UNCLASSIFIED PROTEINS                                                                                   |
| CA1850 | 0.7 | 1.0 |     | 0.9 | IPF14630   | 7317320..7 unknown function                   | orf19.641   | 14630 | IPF14630   | PROTEIN †molecular_function unknown                                                                     |
| CA1851 | 0.9 | 1.1 | 0.9 | 0.9 | SAP155     | complemer Cell cycle protein, inter           | orf19.642   | 14629 | CaSAP155   | CELL CYCLE AND DNA PROCESSING CELL FATE                                                                 |
| CA1852 | 1.5 | 1.0 | 0.9 | 0.8 | IPF13885.f | 7322082..7 unknown function, 5-prime end      |             | 14628 | IPF13885.r | No significant S.c. match                                                                               |
| CA1853 | 1.0 | 1.0 | 1.2 | 0.9 | LYP1       | 7325015..7 lysine-specific high-affi          | orf19.651   | 16499 | CaLYP1     | Amino acid metabolism CELLULAR TRANSPORT AND TRANSPORT MECHANISMS SUBCELLULAR LOCALISATION TRAN         |
| CA1854 | 1.3 | 1.1 | 1.1 | 1.0 | IPF12611   | 7327934..7 unknown function                   | orf19.649   | 12611 | IPF12611   | UNCLASSI molecular_function unknown                                                                     |
| CA1855 | 1.4 | 2.9 | 1.1 | 1.5 | GLN1       | 7336170..7 glutamate-ammonia lig              | orf19.646   | 15149 | CaGLN1     | Amino acid ligase activity                                                                              |
| CA1856 | 1.2 | 1.0 | 1.0 | 1.1 | IPF13689   | 7343526..7 unknown function                   | orf19.9081  | 13689 | IPF13689   | No significant S.c. match                                                                               |
| CA1857 | 1.1 | 0.9 | 1.0 | 1.0 | IPF15348   | 7345494..7 unknown function                   | orf19.9080  | 15348 | IPF15348   | UNCLASSIFIED PROTEINS                                                                                   |
| CA1858 | 0.9 | 1.0 | 1.1 | 1.0 | IPF15344   | 7349681..7 unknown function                   | orf19.9076  | 15344 | IPF15344   | UNCLASSIFIED PROTEINS                                                                                   |
| CA1859 | 1.4 | 1.0 | 1.0 | 0.8 | IPF19614   | 7358890..7 putative transcription f           | orf19.9073  | 19614 | IPF19614   | TRANSCRIPTION                                                                                           |
| CA1860 | 1.1 | 1.1 | 1.1 | 1.1 | UTR4       | 7361856..7 unknown function                   | orf19.9072  | 16638 | CaUTR4     | Amino acid molecular_function unknown                                                                   |
| CA1861 | 0.8 | 1.3 | 1.2 | 1.0 | RAD32      | 7364965..7 DNA repair protein (by             | orf19.866   | 15212 | CaRAD32    | CELL CYC nucleotidyltransferase activity                                                                |
| CA1862 | 1.0 | 1.5 |     | 1.0 | NMD2       | complemer Nonsense-mediated m                 | orf19.864   | 7641  | CaNMD2     | Nucleotide protein binding                                                                              |
| CA1863 | 0.8 | 1.2 | 0.9 | 1.1 | MRPL35     | complemer Ribosomal protein of t              | orf19.863   | 7643  | CaMRPL35   | PROTEIN †structural molecule activity                                                                   |
| CA1864 | 1.1 | 0.8 | 1.0 | 1.0 | IPF7644    | complemer unknown function                    | orf19.862   | 7644  | IPF7644    | No significant S.c. match                                                                               |
| CA1865 | 0.8 | 1.0 | 1.0 | 0.9 | IPF7646    | complemer putative transcription f            | orf19.861   | 7646  | IPF7646    | TRANSCRIPTION SUBCELLULAR LOCALISATION                                                                  |
| CA1866 | 1.2 | 1.4 | 1.3 | 1.1 | IPF7647    | 7374630..7 unknown function                   | orf19.860   | 7647  | IPF7647    | No significant S.c. match                                                                               |
| CA1868 | 0.3 | 1.1 | 0.9 | 1.1 | IPF14501.† | 7380194..7 putative G-protein, -tra           | orf19.9992  | 18597 | IPF14501.‡ | UNCLASSI molecular_function unknown                                                                     |
| CA1869 | 1.2 | 1.2 | 1.2 | 1.1 | IPF15822   | complemer unknown function                    | orf19.9993  | 15822 | IPF15822   | No significant S.c. match                                                                               |
| CA1870 | 1.0 | 1.2 | 1.2 | 0.9 | IPF16981.f | complemer unknown function, exo               | orf19.9994  | 16981 | IPF16981.ε | UNCLASSIFIED PROTEINS                                                                                   |
| CA1871 | 1.2 | 1.1 | 0.9 | 1.1 | IPF16981.f | complemer unknown function, exo               | orf19.9995  | 18595 | IPF16981.ε | UNCLASSI molecular_function unknown                                                                     |
| CA1872 | 0.7 | 1.0 | 1.0 | 1.0 | IPF6700    | complemer unknown function                    | orf19.2459  | 6700  | IPF6700    | No significant S.c. match                                                                               |
| CA1873 | 2.4 | 0.9 | 1.0 | 1.0 | IPF6696    | complemer unknown function                    | orf19.9997  | 6696  | IPF6696    | No significant S.c. match                                                                               |
| CA1874 | 0.7 | 0.8 | 0.9 | 1.0 | TPK2       | 7401744..7 cAMP-dependent prote               | orf19.2277  | 10304 | CaTPK2     | TRANSCR protein kinase activity                                                                         |
| CA1875 | 1.2 | 1.2 | 0.8 | 0.9 | RPB9       | complemer DNA-directed RNA pol                | orf19.2276  | 10302 | CaRPB9     | TRANSCR nucleotidyltransferase activity                                                                 |
| CA1876 | 0.5 | 1.1 | 0.9 | 1.0 | IPF10301   | 7404401..7 putative 60S ribosoma              | orf19.2275  | 10301 | IPF10301   | PROTEIN †molecular_function unknown                                                                     |
| CA1877 | 1.2 | 1.0 | 0.9 | 0.8 | IPF10300   | complemer unknown function                    | orf19.2274  | 10300 | IPF10300   | No significant S.c. match                                                                               |
| CA1878 | 1.9 | 1.2 | 1.0 | 0.9 | IPF10298   | 7407778..7 unknown function                   | orf19.2272  | 10298 | IPF10298   | UNCLASSI transcription regulator activity                                                               |
| CA1879 | 1.0 | 0.7 | 1.0 | 1.0 | SMF12      | complemer manganese transporte                | orf19.2270  | 19747 | CaSMF12    | PROTEIN †transporter activity                                                                           |
| CA1880 | 0.5 | 0.9 | 0.9 | 1.0 | IPF13316   | complemer unknown function                    | orf19.2269  | 13316 | IPF13316   | UNCLASSI molecular_function unknown                                                                     |
| CA1881 | 1.0 | 1.1 | 0.8 | 1.1 | RCK2       | 7416783..7 Ca/calmodulin-depend               | orf19.9808  | 19933 | CaRCK2     | ENERGY C protein kinase activity                                                                        |
| CA1882 | 1.0 | 0.9 | 0.9 | 1.1 | IPF19934   | complemer unknown function                    | orf19.9755  | 19934 | IPF19934   | No significant S.c. match                                                                               |
| CA1883 | 1.0 | 0.9 | 0.7 | 0.9 | IPF5479    | 7424011..7 unknown function                   | orf19.2209  | 5479  | IPF5479    | UNCLASSIFIED PROTEINS                                                                                   |
| CA1884 | 0.7 | 1.3 | 1.2 | 1.2 | IPF5486    | 7427257..7 unknown function                   | orf19.2208  | 5486  | IPF5486    | No significant S.c. match                                                                               |
| CA1886 | 0.8 | 1.0 |     | 0.9 | RHO2.3F    | 7432655..7 GTP-binding protein of the RHO sub |             | 5490  | CaRHO2.3   | C-compound and carbohydrate metabolism CELLULAR COMMUNICATION/SIGNAL TRANSDUCTION MECHANISM CELL FA     |
| CA1887 | 0.9 | 1.0 | 1.2 | 1.2 | IPF5496    | 7434209..7 unknown function                   | orf19.2204  | 5496  | IPF5496    | UNCLASSI molecular_function unknown                                                                     |
| CA1888 | 0.5 | 0.9 | 1.1 | 0.9 | IPF18594   | complemer unknown function                    | orf19.9748  | 18594 | IPF18594   | C-compound and carbohydrate metabolism ENERGY                                                           |
| CA1889 | 0.5 | 1.0 | 0.9 | 0.8 | CBP6       | 7437555..7 Apo-cytochrome B pre-mRNA proce    |             | 18593 | CaCBP6     | TRANSCR molecular_function unknown                                                                      |
| CA1891 | 7.5 | 3.0 | 3.6 | 1.3 | IPF10196   | 7443681..7 unknown function                   | orf19.2752  | 10196 | IPF10196   | C-compour DNA binding,transcription regulator activity                                                  |
| CA1892 | 1.3 | 1.0 | 1.1 | 1.0 | IPF10197   | complemer Similarity to transcripti           | orf19.2753  | 10197 | IPF10197   | TRANSCRIPTION                                                                                           |
| CA1893 | 0.7 | 0.7 | 0.9 | 1.0 | TIM13      | 7452428..7 subunit of mitochondri             | orf19.2754  | 10200 | CaTIM13    | PROTEIN †transporter activity                                                                           |
| CA1894 | 0.9 | 1.1 | 1.1 | 1.0 | PRE7.EXO   | 7453387..7 putative subunit of 20S            | orf19.2755  | 12002 | CaPRE7.e)  | PROTEIN †peptidase activity                                                                             |
| CA1895 | 1.2 | 0.9 | 1.2 | 1.0 | PRE7.EXO   | 7453894..7 subunit of 20S proteasome, exon 2  |             | 12004 | CaPRE7.e)  | PROTEIN FATE [folding modification destination] ""SUBCELLULAR LOCALISATION                              |
| CA1896 | 0.5 | 0.9 | 0.8 | 1.2 | ERD2       | complemer ER lumen protein retai              | orf19.2756  | 12003 | CaERD2     | PROTEIN FATE [folding modification destination] ""CELLULAR TRANSPORT AND TRANSPORT MECHANISMS SUBCELLUL |
| CA1897 | 1.3 | 1.1 | 0.8 | 0.8 | IPF12002   | complemer unknown function                    | orf19.10271 | 12002 | IPF12002   | CELL CYCLE AND DNA PROCESSING SUBCELLULAR LOCALISATION                                                  |
| CA1898 | 1.0 | 0.8 | 0.9 | 1.0 | IPF11998   | 7457401..7 unknown function                   | orf19.10273 | 11998 | IPF11998   | No significant S.c. match                                                                               |
| CA1899 | 0.9 | 1.1 | 1.0 | 1.0 | HDA1       | 7461699..7 Histone deacetylase (t             | orf19.2606  | 15480 | CaHDA1     | CELL CYC hydrolase activity                                                                             |
| CA1900 | 0.8 | 1.0 | 0.9 | 1.0 | ARK1       | complemer actin regulating serine/            | orf19.2605  | 14133 | CaARK1     | CELL CYCLE AND DNA PROCESSING SUBCELLULAR LOCALISATION                                                  |
| CA1901 | 0.8 | 0.9 | 0.9 | 1.0 | IPF14135   | 7467022..7 unknown function                   | orf19.2604  | 14135 | IPF14135   | UNCLASSI molecular_function unknown                                                                     |
| CA1902 | 0.9 | 0.9 | 5.8 | 1.0 | OPT1       | 7470380..7 oligopeptide transporte            | orf19.2602  | 14139 | CaOPT1     | CELL FAT†transporter activity                                                                           |
| CA1903 | 0.8 | 0.9 | 0.9 | 1.0 | IPF2754    | complemer unknown function                    |             | 2754  | IPF2754    | No significant S.c. match                                                                               |
| CA1904 | 1.5 | 1.0 | 1.0 | 0.8 | GRX5       | complemer Glutaredoxin                        | orf19.10298 | 7275  | CaGRX5     | PROTEIN †oxidoreductase activity                                                                        |
| CA1905 | 1.0 | 0.9 | 1.3 | 0.8 | IPF7274    | 7478916..7 unknown function                   | orf19.2783  | 7274  | IPF7274    | CELL RESCUE DEFENSE AND VIRULENCE ""SUBCELLULAR LOCALISATION                                            |
| CA1906 | 1.2 | 1.0 | 1.0 | 0.9 | IPF7271    | 7480500..7 unknown function                   | orf19.2784  | 7271  | IPF7271    | No significant S.c. match                                                                               |
| CA1907 | 0.4 | 1.0 | 0.8 | 1.0 | ATP7       | complemer F1FO-ATPase complex                 | orf19.2785  | 7270  | CaATP7     | ENERGY C structural molecule activity                                                                   |
| CA1908 | 1.7 | 1.2 | 1.1 | 0.9 | APL3       | 7482636..7 AP-2 complex subunit,              | orf19.2786  | 7268  | CaAPL3     | PROTEIN †molecular_function unknown                                                                     |
| CA1909 | 1.5 | 1.1 | 1.1 | 1.4 | IPF20091   | 7487008..7 unknown function                   | orf19.10303 | 20091 | IPF20091   | CELL FATE                                                                                               |
| CA1910 | 0.7 | 1.1 | 0.9 | 1.1 | IPF7260    | complemer unknown function                    | orf19.10306 | 7260  | IPF7260    | UNCLASSI transferase activity                                                                           |
| CA1911 | 3.1 | 2.2 | 1.5 | 1.2 | SSE1       | 7500200..7 heat shock protein of †            | orf19.2435  | 13776 | CaSSE1     | CELL RES chaperone activity                                                                             |
| CA1912 | 1.0 | 1.2 | 1.0 | 1.0 | SKY1       | 7503972..7 SRPK1 like protein kin             | orf19.2436  | 13772 | CaSKY1     | UNCLASSI protein kinase activity                                                                        |
| CA1913 | 0.7 | 1.1 | 1.0 | 1.0 | ARC35      | 7506384..7 subunit of the Arp2/3 c            | orf19.2437  | 16563 | CaARC35    | CELLULAF structural molecule activity                                                                   |
| CA1914 | 0.9 | 0.9 |     | 1.0 | IPF16564   | complemer putative mitochondrial              | orf19.2438  | 16564 | IPF16564   | PROTEIN †molecular_function unknown                                                                     |
| CA1915 | 0.7 | 0.9 | 1.0 | 1.0 | IPF16565   | 7508297..7 unknown function                   | orf19.2439  | 16565 | IPF16565   | Lipid fatty-acid and isoprenoid metabolism ""SUBCELLULAR LOCALISATION TRANSPORT FACILITATION            |
| CA1916 | 1.2 | 1.1 | 1.0 | 0.9 | IPF16566.† | 7509360..7 unknown function, 3-prime end      |             | 16566 | IPF16566.‡ | No significant transporter activity,oxidoreductase activity                                             |
| CA1917 | 1.0 | 1.3 | 0.9 | 1.2 | IPF7479.3f | complemer unknown function, 3-pr              | orf19.2440  | 7479  | IPF7479.3f | UNCLASSIFIED PROTEINS                                                                                   |
| CA1918 | 1.0 | 1.0 | 1.2 | 1.1 | IPF7479.5f | complemer unknown function, 5-pr              | orf19.2441  | 7478  | IPF7479.5f | No significant S.c. match                                                                               |
| CA1919 | 1.0 | 1.0 | 1.0 | 1.0 | IPF7477    | 7512539..7 unknown function                   | orf19.2442  | 7477  | IPF7477    | No significant S.c. match                                                                               |
| CA1920 | 0.7 | 1.2 | 0.9 | 1.1 | IPF7476    | complemer similar to Saccharomy               | orf19.2443  | 7476  | IPF7476    | CELLULAF enzyme regulator activity                                                                      |

|        |     |     |      |     |            |                                                 |                  |                                                                                                         |
|--------|-----|-----|------|-----|------------|-------------------------------------------------|------------------|---------------------------------------------------------------------------------------------------------|
| CA1921 | 0.9 | 1.3 | 0.9  | 1.2 | IPF7475    | complemer similar to Saccharomy orf19.2444      | 7475 IPF7475     | CELLULAF molecular_function unknown                                                                     |
| CA1922 | 0.5 | 1.0 | 0.8  | 1.0 | DIP52      | complemer Dicarboxylic amino aci orf19.2445     | 7474 CaDIP52     | Amino acid metabolism SUBCELLULAR LOCALISATION TRANSPORT FACILITATION                                   |
| CA1923 | 1.5 | 1.0 | 1.1  | 0.8 | IPF9130    | complemer unknown function orf19.5539           | 9130 IPF9130     | No significant S.c. match                                                                               |
| CA1924 | 0.7 | 0.6 | 0.9  | 1.0 | IPF9126    | 7531935..7 unknown function orf19.5537          | 9126 IPF9126     | CELL RES signal transducer activity                                                                     |
| CA1925 | 0.7 | 1.1 | 0.9  | 0.9 | IPF18587   | 7540351..7 putative methyltransfer orf19.8372   | 18587 IPF18587   | CELL CYCLE AND DNA PROCESSING SUBCELLULAR LOCALISATION                                                  |
| CA1926 | 1.4 | 1.2 | 1.0  | 1.2 | IPF13407   | complemer Unknown function orf19.8373           | 13407 IPF13407   | C-compound and carbohydrate metabolism ""PROTEIN FATE [folding modification destination] ""             |
| CA1927 | 1.1 | 0.9 | 1.0  | 1.1 | YBN5       | complemer Putative purine nucleot orf19.754     | 13405 CaYBN5     | UNCLASSI molecular_function unknown                                                                     |
| CA1928 | 0.8 | 0.9 | 1.0  | 1.1 | MRPL37     | 7545977..7 Mitochondrial ribosom; orf19.755     | 13404 CaMRPL37   | PROTEIN !structural molecule activity                                                                   |
| CA1929 | 0.5 | 1.0 | 1.0  | 1.0 | SAP7       | complemer secreted aspartyl prote orf19.8376    | 19935 CaSAP7     | PROTEIN FATE [folding modification destination] ""Other virulence attributes                            |
| CA1930 | 0.8 | 1.1 |      | 1.1 | IPF3906.3  | 7553342..7 unknown function, 3-pr orf19.758     | 3906 IPF3906.3   | UNCLASSI signal transducer activity                                                                     |
| CA1931 | 1.3 | 0.9 | 0.9  | 0.9 | IPF3905    | complemer similar to Saccharomy orf19.759       | 3905 IPF3905     | CELLULAF molecular_function unknown                                                                     |
| CA1932 | 1.2 | 1.0 | 1.1  | 0.9 | IPF3903    | 7557161..7 unknown function orf19.760           | 3903 IPF3903     | PROTEIN !structural molecule activity                                                                   |
| CA1933 | 1.3 | 1.0 | 0.9  | 1.0 | IPF18586   | complemer Unknown function orf19.8381           | 18586 IPF18586   | No significant S.c. match                                                                               |
| CA1934 | 1.1 | 1.1 | 1.1  | 0.9 | YAP1802.3  | 7561674..7 cytoskeletal adaptor, member of AP   | 8015 CaYAP180    | PROTEIN FATE [folding modification destination] ""CELLULAR TRANSPORT AND TRANSPORT MECHANISMS SUBCELLUL |
| CA1935 | 0.8 | 1.0 | 1.1  | 1.0 | IPF19936   | complemer unknown function orf19.4185           | 19936 IPF19936   | UNCLASSI protein phosphatase activity                                                                   |
| CA1936 | 1.1 | 1.1 | 1.3  | 1.1 | PCT1       | 7564083..7 cholinephosphate cytic orf19.4186    | 8007 CaPCT1      | Lipid fatty-ε nucleotidyltransferase activity                                                           |
| CA1937 | 1.2 | 1.0 | 1.1  | 0.8 | MMM1       | 7565694..7 mitochondrial outer me orf19.4187    | 8006 CaMMM1      | SUBCELLL molecular_function unknown                                                                     |
| CA1938 | 1.8 | 1.2 | 1.1  | 1.0 | NMD5       | 7567805..7 putative Nam7p/Upf1p orf19.4188      | 8002 CaNMD5      | Nucleotide protein binding                                                                              |
| CA1939 | 0.9 | 0.9 | 1.0  | 1.0 | IPF8000    | 7572102..7 unknown function orf19.4189          | 8000 IPF8000     | No significant S.c. match                                                                               |
| CA1940 | 0.9 | 0.9 | 1.0  | 1.1 | IPF7999    | complemer unknown function orf19.4190           | 7999 IPF7999     | UNCLASSI molecular_function unknown                                                                     |
| CA1941 | 0.8 | 0.9 | 1.1  | 0.9 | IPF7998    | 7574570..7 Ribosomal protein L24 orf19.4191     | 7998 IPF7998     | PROTEIN !molecular_function unknown                                                                     |
| CA1942 | 1.2 | 0.9 | 1.1  | 1.2 | HCT5.3EO   | complemer #N/A                                  | 7996 CaHCT5.3    | TRANSCRIPTION                                                                                           |
| CA1943 |     |     |      |     | IPF11759   | 7577262..7579019                                |                  |                                                                                                         |
| CA1944 | 1.1 | 1.0 | 14.9 | 1.0 | IPF10645   | 7579486..7 unknown function orf19.4738          | 10645 IPF10645   | UNCLASSI molecular_function unknown                                                                     |
| CA1945 | 1.3 | 1.0 |      | 0.9 | MSS116     | complemer RNA helicase of the D1orf19.4739      | 10643 CaMSS116   | TRANSCR RNA binding,helicase activity                                                                   |
| CA1946 | 1.0 | 0.9 | 0.8  | 1.1 | IPF19937   | complemer putative peptidyl-tRNA orf19.4740     | 19937 IPF19937   | PROTEIN !hydrolase activity                                                                             |
| CA1947 | 0.8 | 1.1 | 1.0  | 1.1 | IPF10637   | 7585182..7 starvation protein -like orf19.12204 | 10637 IPF10637   | SUBCELLULAR LOCALISATION                                                                                |
| CA1948 | 0.8 | 0.8 | 0.9  | 0.9 | IPF14022   | complemer ATPase family gene (b orf19.12205     | 14022 IPF14022   | CLASSIFICATION NOT YET CLEAR-CUT                                                                        |
| CA1949 | 1.2 | 1.1 | 1.0  | 1.1 | IPF14021   | complemer dual specificity phosph orf19.12206   | 14021 IPF14021   | CLASSIFIC hydrolase activity                                                                            |
| CA1950 | 1.6 | 1.3 | 1.3  | 0.9 | IPF14019   | complemer unknown function orf19.12208          | 14019 IPF14019   | UNCLASSI molecular_function unknown                                                                     |
| CA1951 | 1.5 | 1.0 | 1.5  | 0.9 | HEM14      | 7593736..7 Mitochondrial protopor orf19.12209   | 19663 CaHEM14    | Metabolism oxidoreductase activity                                                                      |
| CA1952 | 0.9 | 0.9 | 1.1  | 1.0 | IFP1       | 7599449..7 Unknown function orf19.762           | 3901 CaIFP1      | No significant S.c. match                                                                               |
| CA1953 | 1.3 | 1.0 | 0.8  | 0.8 | IPF3899    | complemer similar to Saccharomy orf19.763       | 3899 IPF3899     | CELL CYC RNA binding                                                                                    |
| CA1954 | 0.9 | 0.8 | 1.1  | 1.2 | IPF3897.5f | 7602644..7 unknown function, 5-pr orf19.764     | 18581 IPF3897.5f | UNCLASSI molecular_function unknown                                                                     |
| CA1955 | 1.2 | 1.0 | 0.8  | 1.0 | IPF3897.3f | 7603593..7 unknown function, 3-pr orf19.765     | 3897 IPF3897.3f  | UNCLASSIFIED PROTEINS                                                                                   |
| CA1956 | 0.4 | 0.2 | 0.5  | 0.8 | ERG3       | 7606896..7 C5,6 desaturase orf19.767            | 3890 CaERG3      | Lipid fatty-ε oxidoreductase activity                                                                   |
| CA1957 | 1.5 | 1.1 | 1.1  | 1.0 | IPF3887    | 7609190..7 similar to Saccharomy orf19.768      | 3887 IPF3887     | REGULATI molecular_function unknown                                                                     |
| CA1958 | 1.0 | 1.0 | 1.0  | 1.1 | IFE1       | complemer Unknown function orf19.769            | 3885 CaIFE1      | C-compour oxidoreductase activity                                                                       |
| CA1959 | 1.1 | 1.0 | 1.0  | 1.1 | IFD2       | complemer putative oxidoreductas orf19.771      | 3883 CaIFD2      | C-compour oxidoreductase activity                                                                       |
| CA1960 | 1.0 | 1.1 | 1.0  | 1.0 | IPF15232   | 7617490..7 unknown function orf19.2400          | 15232 IPF15232   | UNCLASSI molecular_function unknown                                                                     |
| CA1961 | 1.3 | 1.1 | 1.3  | 1.3 | IPF14284   | complemer putative dnaJ-like prote orf19.2399   | 15229 IPF14284   | PROTEIN !molecular_function unknown                                                                     |
| CA1962 | 1.5 | 1.8 | 1.4  | 1.2 | IPF14285   | complemer unknown function orf19.2398           | 14285 IPF14285   | No significant S.c. match                                                                               |
| CA1963 | 1.0 | 1.0 | 0.9  | 0.8 | IPF14040   | 7627840..7 probable transporter (t orf19.2397   | 14040 IPF14040   | TRANSPORT FACILITATION                                                                                  |
| CA1964 | 0.5 | 0.7 | 0.8  | 1.2 | IFR2       | 7630467..7 unknown function orf19.2396          | 14036 CaIFR2     | SUBCELLULAR LOCALISATION                                                                                |
| CA1965 | 0.8 | 0.9 | 0.9  | 1.2 | IPF14035   | complemer Similar to serine/threor orf19.2395   | 14035 IPF14035   | CELL CYC protein kinase activity                                                                        |
| CA1966 | 0.9 | 0.9 |      | 1.1 | IFR4       | complemer unknown function orf19.2394           | 11494 CaIFR4     | SUBCELLL oxidoreductase activity                                                                        |
| CA1967 | 1.5 | 1.0 | 1.3  | 0.9 | IPF10866   | 7638111..7 similar to Saccharomy orf19.5219     | 10866 IPF10866   | Nucleotide enzyme regulator activity                                                                    |
| CA1968 | 1.3 | 0.8 | 1.0  | 0.9 | IPF10864   | complemer similar to Saccharomy orf19.5220      | 10864 IPF10864   | CELL CYC hydrolase activity                                                                             |
| CA1969 | 1.0 | 1.1 | 1.1  | 1.1 | IPF18579.ε | complemer unknown function, 3-pr orf19.5221     | 10863 IPF18579.ε | UNCLASSI molecular_function unknown                                                                     |
| CA1970 | 1.2 | 0.9 | 1.1  | 0.9 | IPF18579.ε | complemer unknown function, 5-pr orf19.5222     | 18579 IPF18579.ε | No significant S.c. match                                                                               |
| CA1971 | 0.9 | 1.0 | 1.0  | 0.8 | PKH2       | 7651993..7 Ser/Thr protein kinase; orf19.5224   | 10418 CaPKH2     | UNCLASSI protein kinase activity                                                                        |
| CA1972 | 0.2 | 0.5 | 0.6  | 0.9 | RPL27A     | 7656496..7 ribosomal protein L27                | 10412 CaRPL27A   | PROTEIN !structural molecule activity                                                                   |
| CA1973 | 0.7 | 1.0 | 0.9  | 0.9 | WRS1       | 7657314..7 tryptophan-tRNA ligas orf19.5226     | 10411 CaWRS1     | PROTEIN !ligase activity                                                                                |
| CA1974 | 0.5 | 0.8 | 1.0  | 1.0 | IPF10410   | complemer unknown function orf19.5227           | 10410 IPF10410   | UNCLASSI molecular_function unknown                                                                     |
| CA1975 | 0.9 | 1.0 |      | 1.0 | PLB1       | complemer phospholipase B orf19.689             | 9584 CaPLB1      | Lipid fatty-acid and isoprenoid metabolism ""Other virulence attributes                                 |
| CA1976 | 0.6 | 0.9 | 0.9  | 0.9 | IPF9582    | 7666057..7 similar to Saccharomy orf19.688      | 9582 IPF9582     | PROTEIN !structural molecule activity                                                                   |
| CA1977 | 0.3 | 0.8 |      | 0.7 | RPL25.3    | 7667499..7 ribosomal protein L23a, 3-prime end  | 9581 CaRPL25.3   | PROTEIN !RNA binding                                                                                    |
| CA1978 | 0.8 | 1.0 | 1.0  | 1.1 | IPF9580    | complemer unknown function orf19.687            | 9580 IPF9580     | No significant S.c. match                                                                               |
| CA1979 | 0.8 | 0.9 | 0.8  | 1.2 | IPF9577    | 7670060..7 unknown function orf19.686           | 9577 IPF9577     | UNCLASSI molecular_function unknown                                                                     |
| CA1980 | 0.9 |     | 1.1  | 1.1 | YHM1       | complemer member of the mitochc orf19.685       | 16978 CaYHM1     | CELLULAF transporter activity                                                                           |
| CA1981 | 1.3 | 1.0 | 1.2  | 0.9 | IPF9470    | 7674421..7 similar to Saccharomy orf19.684      | 9470 IPF9470     | TRANSCR protein binding                                                                                 |
| CA1982 | 1.1 | 1.5 | 1.0  | 1.2 | ADK1       | complemer adenylate kinase, cyto; orf19.683     | 20093 CaADK1     | Nucleotide transferase activity                                                                         |
| CA1983 | 0.5 | 0.5 | 0.7  | 1.0 | ILV5       | complemer ketol-acid reducto-ison orf19.7733    | 9595 CaILV5      | Amino acid oxidoreductase activity                                                                      |
| CA1984 | 0.7 | 1.0 | 1.0  | 1.0 | IPF9592    | 7685772..7 unknown function orf19.7736          | 9592 IPF9592     | UNCLASSIFIED PROTEINS                                                                                   |
| CA1985 | 1.2 | 1.1 | 0.9  | 0.8 | IPF9591    | complemer unknown function orf19.91             | 9591 IPF9591     | UNCLASSI molecular_function unknown                                                                     |
| CA1986 | 1.1 | 1.4 | 1.1  | 1.0 | IPF14899   | complemer unknown function orf19.92             | 14899 IPF14899   | UNCLASSI molecular_function unknown                                                                     |
| CA1987 | 0.6 | 1.2 | 1.0  | 0.9 | IPF14895   | 7693851..7 unknown function orf19.7739          | 14895 IPF14895   | UNCLASSI molecular_function unknown                                                                     |
| CA1988 | 1.0 | 1.1 | 1.3  | 1.1 | IPF19749   | complemer unknown function orf19.94             | 19749 IPF19749   | No significant S.c. match                                                                               |
| CA1989 | 0.8 | 0.9 | 0.9  | 0.8 | IPF16596   | complemer unknown function orf19.95             | 16596 IPF16596   | No significant S.c. match                                                                               |
| CA1990 | 0.8 | 1.0 | 1.1  | 0.9 | TOP1       | complemer CANAL DNA TOPOIS; orf19.7742          | 17557 CaTOP1     | CELL CYC isomerase activity                                                                             |
| CA1991 | 1.2 | 0.9 | 1.0  | 0.7 | IPF6617.Ri | 7702053..7 unknown function, rep; orf19.13839   | 6619 IPF6617.re  | UNCLASSIFIED PROTEINS                                                                                   |

|        |     |     |     |     |                                            |                                               |             |            |                           |                                                                              |
|--------|-----|-----|-----|-----|--------------------------------------------|-----------------------------------------------|-------------|------------|---------------------------|------------------------------------------------------------------------------|
| CA1992 | 0.9 | 0.9 | 1.0 | 1.1 | IPF6617.RI7703699..7 unknown function, rep | orf19.6484                                    | 6617        | IPF6617.re | No significant S.c. match |                                                                              |
| CA1993 | 1.4 | 1.0 | 0.8 | 0.8 | IPF6614                                    | 7704943..7 unknown function                   | orf19.6482  | 6614       | IPF6614                   | PROTEIN SYNTHESIS SUBCELLULAR LOCALISATION                                   |
| CA1994 | 1.4 | 1.2 | 1.1 | 1.2 | IPF6613                                    | 7705947..7 unknown function                   | orf19.6481  | 6613       | IPF6613                   | CLASSIFICpeptidase activity                                                  |
| CA1995 | 0.9 |     | 0.9 | 1.1 | IPF6612                                    | complemer unknown function                    | orf19.6480  | 6612       | IPF6612                   | UNCLASSItransporter activity                                                 |
| CA1996 | 0.9 | 0.9 | 0.8 | 1.0 | SEC1                                       | 7710748..7 transport protein                  | orf19.6479  | 6609       | CaSEC1                    | CELLULAFprotein binding                                                      |
| CA1997 | 1.5 | 1.3 | 1.3 | 1.0 | YCF1                                       | 7713550..7 Glutathione S-conjugat             | orf19.6478  | 6607       | CaYCF1                    | CELLULAFtransporter activity                                                 |
| CA1998 | 1.5 | 1.0 | 1.0 | 0.8 | IPF6605                                    | complemer unknown function                    | orf19.6477  | 6605       | IPF6605                   | UNCLASSIprotein binding                                                      |
| CA1999 | 1.2 | 1.1 | 1.1 | 1.0 | IPF19513                                   | complemer unknown function                    | orf19.13830 | 19513      | IPF19513                  | UNCLASSImolecular_function unknown                                           |
| CA2000 | 0.8 | 1.2 | 1.1 | 0.9 | IPF11796                                   | 7724290..7 unknown function                   | orf19.2791  | 11796      | IPF11796                  | No significant S.c. match                                                    |
| CA2001 | 2.4 | 0.8 | 0.9 | 1.0 | IPF17074                                   | 7729908..7 unknown function                   | orf19.2792  | 17074      | IPF17074                  | UNCLASSImolecular_function unknown                                           |
| CA2002 | 1.3 | 1.0 |     | 1.1 | IPF16470                                   | complemer unknown function                    | orf19.2794  | 16470      | IPF16470                  | UNCLASSIisomerase activity                                                   |
| CA2003 | 0.9 | 1.1 | 1.0 | 1.0 | IPF16471                                   | 7734019..7 unknown function                   | orf19.2795  | 16471      | IPF16471                  | TRANSCR RNA binding                                                          |
| CA2004 | 1.4 | 1.2 | 1.1 | 0.8 | POL12                                      | 7735550..7 DNA-directed DNA pol               | orf19.2796  | 15718      | CaPOL12                   | CELL CYC nucleotidyltransferase activity                                     |
| CA2005 | 0.3 | 0.9 | 0.9 | 1.0 | IPF11802                                   | 7737793..7 unknown function                   | orf19.2797  | 11802      | IPF11802                  | UNCLASSIFIED PROTEINS                                                        |
| CA2006 | 1.3 | 1.0 | 1.0 | 0.8 | IPF11801                                   | 7739903..7 unknown function                   | orf19.2798  | 11801      | IPF11801                  | UNCLASSIhelicase activity                                                    |
| CA2007 | 0.7 | 1.2 |     | 1.0 | GP18                                       | 7742136..7 essential for GPI anch             | orf19.2799  | 11799      | CaGP18                    | Lipid fatty- $\epsilon$ hydrolase activity                                   |
| CA2008 | 1.3 | 1.0 | 1.2 | 0.9 | IPF1742.3f                                 | 7744454..7 unknown function, 3-prime end      |             | 1740       | IPF1742.3f                | No significant S.c. match                                                    |
| CA2009 | 0.8 | 0.9 | 1.0 | 0.9 | IPF1732                                    | 7747497..7 intramitochondrial prot            | orf19.3089  | 1732       | IPF1732                   | PROTEIN Imolecular_function unknown                                          |
| CA2010 | 0.7 | 1.0 | 1.1 | 1.1 | IPF1731                                    | 7748288..7 unknown function                   | orf19.3088  | 1731       | IPF1731                   | REGULATIImolecular_function unknown                                          |
| CA2011 | 0.3 | 0.5 | 0.8 | 1.1 | RPS31                                      | 7749911..7 Ubiquitin fusion protein           | orf19.3087  | 1727       | CaRPS31                   | PROTEIN Istructural molecule activity                                        |
| CA2012 | 1.3 | 1.1 | 1.1 | 0.9 | SEC10                                      | 7750545..7 Required for exocytosi             | orf19.3086  | 1725       | CaSEC10                   | CELLULAFprotein binding                                                      |
| CA2013 | 1.1 | 1.1 | 0.9 | 0.8 | CDC1                                       | complemer Cell division control pr            | orf19.3083  | 1720       | CaCDC1                    | CELL CYC molecular_function unknown                                          |
| CA2014 | 1.5 | 1.0 | 1.0 | 0.9 | IPF1717                                    | complemer similar to Saccharomy               | orf19.10592 | 1717       | IPF1717                   | CELL CYC protein kinase activity                                             |
| CA2015 | 1.0 | 0.9 | 0.9 | 1.1 | IPF3416                                    | 7762798..7 unknown function                   | orf19.8468  | 14806      | IPF3416                   | No significant S.c. match                                                    |
| CA2016 | 1.1 | 0.9 | 0.9 | 0.8 | IPF3415                                    | 7764256..7 similar to Saccharomy              | orf19.8467  | 3415       | IPF3415                   | PROTEIN Ipeptidase activity                                                  |
| CA2017 | 1.6 | 2.0 | 1.2 | 1.4 | IPF3414                                    | complemer putative serine/threonin            | orf19.846   | 3414       | IPF3414                   | CLASSIFICprotein kinase activity                                             |
| CA2018 | 0.8 | 1.2 | 1.0 | 1.0 | STE11                                      | complemer ser/thr protein kinase              | orf19.844   | 3412       | CaSTE11                   | REGULATIprotein kinase activity,signal transducer activity                   |
| CA2019 | 1.1 | 1.0 | 0.9 | 1.1 | IPF3409                                    | complemer unknown function                    | orf19.8463  | 3409       | IPF3409                   | UNCLASSImolecular_function unknown                                           |
| CA2020 | 0.9 | 0.9 |     | 1.0 | IPF16901                                   | complemer unknown function                    | orf19.8462  | 16901      | IPF16901                  | No significant S.c. match                                                    |
| CA2021 | 0.7 | 0.9 | 1.0 | 1.2 | IPF17283                                   | complemer unknown function                    | orf19.4907  | 17283      | IPF17283                  | UNCLASSImolecular_function unknown                                           |
| CA2022 | 0.9 | 0.7 | 0.9 | 1.1 | CBK1                                       | complemer serine/threonine protei             | orf19.4909  | 9611       | CaCBK1                    | CLASSIFICprotein kinase activity                                             |
| CA2023 | 0.4 | 0.8 | 0.9 | 1.4 | RPL42.3                                    | complemer ribosomal protein L36a, 3-prime end |             | 9613       | CaRPL42.3                 | PROTEIN Istructural molecule activity                                        |
| CA2024 | 1.2 | 0.9 | 0.9 | 0.8 | IPF9616                                    | complemer unknown function                    | orf19.4910  | 9616       | IPF9616                   | No significant S.c. match                                                    |
| CA2025 | 1.0 | 0.9 | 1.1 | 1.0 | IPF9618                                    | 7791388..7 unknown function                   | orf19.4911  | 9618       | IPF9618                   | No significant S.c. match                                                    |
| CA2026 | 1.2 | 1.0 | 0.9 | 0.8 | IPF9777                                    | 7796233..7 unknown function                   | orf19.10962 | 9777       | IPF9777                   | UNCLASSImolecular_function unknown                                           |
| CA2027 | 1.2 | 0.9 | 0.8 | 0.8 | MCK1                                       | complemer ser/thr/tyr protein kinas           | orf19.10963 | 9776       | CaMCK1                    | CELL CYC protein kinase activity                                             |
| CA2028 | 1.1 | 0.9 | 1.0 | 1.4 | IPF18561.3                                 | complemer unknown function, , 3-prime end     |             | 18561      | IPF18561.3                | No significant S.c. match                                                    |
| CA2029 | 0.4 | 1.1 | 0.8 | 1.1 | SAR1.3                                     | 7804767..7 GTP-binding protein of             | orf19.10966 | 13117      | CaSAR1.3                  | CELLULAFhydrolase activity                                                   |
| CA2030 | 0.8 | 1.1 | 1.2 | 0.9 | IPF13116                                   | 7806274..7 unknown function                   | orf19.3463  | 13116      | IPF13116                  | UNCLASSIhydrolase activity                                                   |
| CA2031 | 0.6 | 0.8 | 0.7 | 1.0 | RPL10A                                     | complemer L10A ribosomal protein              | orf19.3465  | 13114      | CaRPL10A                  | PROTEIN Istructural molecule activity                                        |
| CA2032 | 1.0 | 1.2 | 1.0 | 1.1 | IPF13112                                   | 7809533..7 unknown function                   | orf19.3466  | 13112      | IPF13112                  | UNCLASSIFIED PROTEINS                                                        |
| CA2033 | 2.0 | 1.0 | 1.1 | 1.2 | SEC27                                      | complemer coatomer complex bet                | orf19.10971 | 16985      | CaSEC27                   | CELLULAFmolecular_function unknown                                           |
| CA2034 | 1.2 | 0.8 | 1.1 | 1.1 | SGD1.3F                                    | complemer Involved in HOG pathway, 3-prime e  |             | 18558      | CaSGD1.3F                 | REGULATION OF/INTERACTION WITH CELLULAR ENVIRONMENT                          |
| CA2035 | 1.3 | 1.1 |     | 1.4 | SGD1.5F                                    | complemer Involved in HOG pathw               | orf19.11841 | 7574       | CaSGD1.5F                 | REGULATIImolecular_function unknown                                          |
| CA2036 | 0.7 | 1.2 | 1.0 | 0.9 | MSP1                                       | 7823690..740 kDa putative memb                | orf19.4362  | 7571       | CaMSP1                    | PROTEIN Ihydrolase activity                                                  |
| CA2037 | 1.3 | 1.4 | 1.0 | 0.9 | IFF3                                       | complemer unknown function                    | orf19.11839 | 20094      | CaIFF3                    | UNCLASSIFIED PROTEINS                                                        |
| CA2038 | 0.6 | 0.9 | 0.8 | 1.0 | IPF17510                                   | complemer unknown function                    | orf19.11836 | 17510      | IPF17510                  | UNCLASSImolecular_function unknown                                           |
| CA2039 | 1.1 | 0.9 | 1.0 | 1.1 | IPF12947                                   | 7830501..7 unknown function                   | orf19.11835 | 12947      | IPF12947                  | UNCLASSImolecular_function unknown                                           |
| CA2040 | 1.7 | 1.2 | 1.5 | 1.0 | IPF12946                                   | complemer unknown function                    | orf19.4356  | 12946      | IPF12946                  | C-compour molecular_function unknown                                         |
| CA2041 | 0.9 | 1.0 | 1.0 | 1.2 | IPF12944                                   | 7836414..7 unknown function                   |             | 12944      | IPF12944                  | No significant S.c. match                                                    |
| CA2042 | 0.9 | 1.1 | 1.0 | 0.9 | IPF14219                                   | complemer probable membrane pr                | orf19.10445 | 14219      | IPF14219                  | UNCLASSImolecular_function unknown                                           |
| CA2043 | 3.3 | 1.1 | 1.0 | 1.4 | GSL21                                      | complemer 1,3-beta-D-glucan synt              | orf19.2929  | 10681      | CaGSL21                   | C-compour transferase activity                                               |
| CA2044 | 0.6 | 0.8 | 0.9 | 1.0 | IPF10668                                   | complemer unknown function                    | orf19.10447 | 10668      | IPF10668                  | UNCLASSItranslation regulator activity                                       |
| CA2045 | 0.8 | 1.0 | 1.0 | 1.0 | IPF8107                                    | complemer unknown function                    | orf19.10450 | 10665      | IPF8107                   | UNCLASSImolecular_function unknown                                           |
| CA2046 | 1.5 | 1.0 | 0.9 | 0.6 | IPF8108                                    | complemer unknown function                    | orf19.10451 | 8108       | IPF8108                   | UNCLASSImolecular_function unknown                                           |
| CA2047 | 0.2 | 0.7 |     | 1.1 | RPL10                                      | 7856908..7 Ribosomal protein L10              | orf19.10452 | 8109       | CaRPL10                   | CELL CYC structural molecule activity                                        |
| CA2049 | 0.8 | 0.9 | 0.9 | 1.1 | IPF12982                                   | complemer unknown function                    | orf19.13148 | 12982      | IPF12982                  | No significant S.c. match                                                    |
| CA2050 | 1.4 | 0.9 | 1.3 | 1.0 | IPF11023                                   | complemer unknown function                    | orf19.13147 | 11023      | IPF11023                  | No significant S.c. match                                                    |
| CA2051 | 1.6 | 1.3 | 1.2 | 1.0 | PXP5                                       | complemer acyl-coenzyme A oxide               | orf19.5723  | 11025      | CaPXP5                    | Lipid fatty-acid and isoprenoid metabolism ""ENERGY SUBCELLULAR LOCALISATION |
| CA2052 | 1.0 | 1.1 | 0.9 | 1.0 | IPF11027                                   | 7867877..7 unknown function                   | orf19.5722  | 11027      | IPF11027                  | TRANSCR molecular_function unknown                                           |
| CA2053 | 1.5 | 1.1 | 1.2 | 0.9 | IPF11029                                   | complemer unknown function                    | orf19.5720  | 11029      | IPF11029                  | TRANSPORT FACILITATION                                                       |
| CA2055 | 0.9 | 0.8 | 1.1 | 1.0 | SAP4                                       | 7877137..7 secreted aspartyl prote            | orf19.5716  | 8099       | CaSAP4                    | PROTEIN FATE [folding modification destination] ""Other virulence attributes |
| CA2056 | 1.2 | 0.9 | 1.0 | 0.9 | URA5                                       | 7881609..7 Orotate phosphoribosy              | orf19.2555  | 7845       | CaURA5                    | Nucleotide transferase activity                                              |
| CA2057 | 1.1 | 0.8 | 0.9 | 1.0 | SEC65                                      | complemer Recognition particle su             | orf19.2557  | 7847       | CaSEC65                   | PROTEIN Imolecular_function unknown                                          |
| CA2058 | 1.3 | 0.9 | 1.0 | 0.9 | IPF7848                                    | 7883632..7 unknown function                   | orf19.2558  | 7848       | IPF7848                   | No significant S.c. match                                                    |
| CA2059 | 0.6 | 1.0 | 1.2 | 1.0 | CDC4                                       | complemer CANAL CELL DIVISIO                  | orf19.2559  | 7849       | CaCDC4                    | CELL CYC protein binding                                                     |
| CA2060 | 0.9 | 1.0 | 1.1 | 0.9 | CDC61.3F                                   | complemer Cytosolic leucyl-tRNA : orf19.2560  |             | 7853       | CaCDC61.3F                | PROTEIN SYNTHESIS SUBCELLULAR LOCALISATION                                   |
| CA2061 | 1.7 | 0.7 | 0.9 | 1.2 | CDC61.5F                                   | complemer Cytosolic leucyl-tRNA : orf19.2562  |             | 7856       | CaCDC61.5F                | PROTEIN Iligase activity                                                     |
| CA2062 | 0.9 | 1.1 | 1.1 | 0.9 | IPF7858                                    | complemer similar to Saccharomy               | orf19.2563  | 7858       | IPF7858                   | TRANSCR RNA binding                                                          |
| CA2063 | 1.0 | 0.9 | 1.2 | 0.9 | IPF7859                                    | 7895146..7 unknown function                   | orf19.2564  | 7859       | IPF7859                   | No significant S.c. match                                                    |
| CA2064 | 1.9 | 1.0 | 1.5 | 1.0 | IPF13024                                   | complemer unknown function                    | orf19.10169 | 13024      | IPF13024                  | TRANSCRIPTION SUBCELLULAR LOCALISATION                                       |

|        |     |     |     |     |            |                                                 |                  |                                                                                                         |
|--------|-----|-----|-----|-----|------------|-------------------------------------------------|------------------|---------------------------------------------------------------------------------------------------------|
| CA2065 | 0.9 |     | 1.3 | 1.1 | QCR2       | 7905191..7 Ubiquinol--cytochrome orf19.2644     | 6978 CaQCR2      | ENERGY " transporter activity,oxidoreductase activity                                                   |
| CA2066 | 0.8 | 0.7 | 0.9 | 0.9 | RPO26      | 7906716..7 DNA-directed RNA pol orf19.2643      | 6977 CaRPO26     | TRANSCR nucleotidyltransferase activity                                                                 |
| CA2067 | 1.2 | 1.0 | 0.9 | 0.8 | IPF6976    | complemer unknown function orf19.2642           | 6976 IPF6976     | CELL CYCLE AND DNA PROCESSING CELLULAR TRANSPORT AND TRANSPORT MECHANISMS CELL FATE SUBCELL             |
| CA2068 | 0.5 | 1.1 | 0.9 | 1.2 | ARP1       | 7908123..7 centractin (by homolog orf19.2641    | 6975 CaARP1      | CELL CYC structural molecule activity                                                                   |
| CA2069 | 0.9 | 0.8 | 0.9 | 0.9 | FUR1       | complemer Uracil phosphoribosyltr orf19.2640    | 6973 CaFUR1      | Nucleotide transferase activity                                                                         |
| CA2070 | 0.8 | 1.1 | 1.1 | 1.0 | IPF6971.3  | complemer unknown function, 3-prime end         | 6972 IPF6971.3   | No significant S.c. match                                                                               |
| CA2071 | 0.8 | 1.0 | 1.3 | 1.3 | IPF6971.5  | complemer unknown function, internal fragment   | 6971 IPF6971.5   | TRANSCR RNA binding                                                                                     |
| CA2072 | 1.2 | 1.0 | 0.9 | 0.8 | IPF6970    | complemer unknown function orf19.2639           | 6970 IPF6970     | PROTEIN ' structural molecule activity                                                                  |
| CA2073 | 1.4 | 1.0 | 1.1 | 0.8 | IPF6967    | 7915229..7 unknown function orf19.10161         | 6967 IPF6967     | No significant S.c. match                                                                               |
| CA2074 | 1.4 | 0.9 | 1.1 | 0.8 | IPF3733    | 7918556..7 unknown function orf19.5287          | 3733 IPF3733     | C-compound and carbohydrate metabolism TRANSCRIPTION CELL FATE SUBCELLULAR LOCALISATION                 |
| CA2075 | 1.2 | 0.6 | 1.5 | 0.8 | IFE2       | 7921959..7 Unknown function orf19.5288          | 3735 CaIFE2      | C-compound and carbohydrate metabolism                                                                  |
| CA2076 | 0.7 | 1.0 | 0.9 | 1.0 | ERO1       | 7930054..7 Required for protein di orf19.4871   | 13354 CaERO1     | PROTEIN I transporter activity                                                                          |
| CA2077 | 1.0 | 1.0 | 0.9 | 1.1 | IPF13353   | 7932518..7 unknown function orf19.4872          | 13353 IPF13353   | No significant S.c. match                                                                               |
| CA2078 | 2.2 | 2.4 | 1.7 | 1.1 | IPF13352   | complemer unknown function orf19.4873           | 13352 IPF13352   | No significant S.c. match                                                                               |
| CA2079 | 1.2 | 1.3 | 1.1 | 1.1 | MNN3       | complemer Golgi alpha-1,2-mann orf19.4874       | 13350 CaMNN3     | CELL FATE                                                                                               |
| CA2080 | 1.1 | 0.9 |     | 1.1 | IPF9693    | 7938813..7 unknown function orf19.4875          | 9693 IPF9693     | UNCLASSI molecular_function unknown                                                                     |
| CA2081 | 0.8 | 1.0 | 1.0 | 0.9 | IPF9699    | complemer unknown function orf19.4878           | 9699 IPF9699     | UNCLASSI molecular_function unknown                                                                     |
| CA2082 | 0.2 | 0.4 | 0.7 | 1.0 | NTF2       | complemer nuclear transport factor (by homolog  | 9700 CaNTF2      | CELLULAF protein binding                                                                                |
| CA2083 | 1.1 | 0.8 | 0.9 | 1.1 | IPF3384.5f | 7950724..7 similar to Saccharomy orf19.832      | 3384 IPF3384.5f  | Secondary transferase activity                                                                          |
| CA2084 | 0.7 | 1.0 | 0.9 | 1.0 | IPF3384.3f | 7953392..7 similar to Saccharomy orf19.833      | 3385 IPF3384.3f  | Secondary metabolism                                                                                    |
| CA2085 | 1.2 | 0.9 | 0.9 | 1.1 | IPF3388    | 7954273..7 unknown function orf19.834           | 3388 IPF3388     | C-compound and carbohydrate metabolism                                                                  |
| CA2086 | 1.2 | 1.4 | 1.2 | 1.2 | IPF3392    | 7957232..7 unknown function orf19.835           | 3392 IPF3392     | UNCLASSI molecular_function unknown                                                                     |
| CA2087 | 0.8 | 1.0 |     | 1.0 | IPF3393    | complemer unknown function orf19.836            | 3393 IPF3393     | No significant S.c. match                                                                               |
| CA2088 | 0.9 | 1.0 | 0.8 | 1.0 | IPF3394    | 7961096..7 unknown function orf19.837           | 3394 IPF3394     | TRANSCR RNA binding                                                                                     |
| CA2089 | 0.7 | 1.0 | 1.8 | 1.0 | GNA1       | complemer Acetyltransferase orf19.837           | 3395 CaGNA1      | CELL CYC transferase activity                                                                           |
| CA2090 | 0.9 | 0.8 | 0.9 | 1.0 | IPF3398.3  | 7963718..7 unknown function, 3-prime end        | 3398 IPF3398.3   | No significant S.c. match                                                                               |
| CA2091 | 1.1 | 0.8 | 1.0 | 1.0 | IPF3401    | complemer unknown function orf19.839            | 3401 IPF3401     | UNCLASSI molecular_function unknown                                                                     |
| CA2092 | 0.2 |     | 0.6 | 0.9 | RPL21A.3   | 7968235..7 Ribosomal protein, 3-p orf19.840     | 3404 CaRPL21A    | PROTEIN ' structural molecule activity                                                                  |
| CA2093 | 0.6 | 1.2 | 0.9 | 1.0 | IPF3406    | 7969031..7 unknown function orf19.841           | 3406 IPF3406     | CELL CYC molecular_function unknown                                                                     |
| CA2094 | 0.9 | 1.4 | 1.1 | 1.0 | IPF11493   | complemer unknown function orf19.9929           | 11493 IPF11493   | TRANSCRIPTION                                                                                           |
| CA2095 | 1.4 | 1.3 |     | 1.0 | IPF11492   | complemer unknown function orf19.2392           | 11492 IPF11492   | No significant S.c. match                                                                               |
| CA2096 | 0.9 | 1.2 | 1.0 | 0.9 | IPF11491   | 7975446..7 unknown function orf19.2391          | 11491 IPF11491   | UNCLASSI molecular_function unknown                                                                     |
| CA2097 | 1.0 | 0.8 | 1.0 | 1.0 | IPF11489   | complemer unknown function orf19.2389           | 11489 IPF11489   | CELL CYC molecular_function unknown                                                                     |
| CA2098 | 0.9 | 0.8 |     | 1.0 | IPF11487   | complemer unknown function orf19.2387           | 11487 IPF11487   | UNCLASSI molecular_function unknown                                                                     |
| CA2099 | 0.8 | 1.0 | 1.1 | 1.1 | IPF11484   | 7979812..7 unknown function orf19.2386          | 11484 IPF11484   | UNCLASSI RNA binding                                                                                    |
| CA2100 | 1.2 | 1.0 | 1.1 | 1.2 | KTI12      | complemer involved in resistance torf19.2385    | 9366 CaKTI12     | CELL RES enzyme regulator activity                                                                      |
| CA2101 | 0.5 | 1.1 |     | 1.2 | IPF9364    | 7981669..7 unknown function orf19.2384          | 9364 IPF9364     | UNCLASSI hydrolase activity                                                                             |
| CA2102 | 0.4 | 1.1 | 0.8 | 1.0 | IPF9363    | complemer similar to Saccharomy orf19.2383      | 9363 IPF9363     | CELL CYC DNA binding                                                                                    |
| CA2103 | 0.5 | 1.0 | 0.9 | 1.0 | ISM1       | 7984853..7 isoleucyl-tRNA synthet orf19.9918    | 9361 CaISM1      | PROTEIN ' ligase activity                                                                               |
| CA2104 | 0.7 | 1.2 | 1.1 | 1.0 | IPF19939   | 7988103..7 unknown function orf19.9917          | 19939 IPF19939   | No significant S.c. match                                                                               |
| CA2105 | 1.0 | 1.1 | 1.0 | 1.1 | IPF10711   | 7993256..7 unknown function orf19.3694          | 10711 IPF10711   | UNCLASSIFIED PROTEINS                                                                                   |
| CA2106 | 0.7 | 1.0 | 1.0 | 1.0 | IPF10714   | 7997299..7 similar to pH-regulated orf19.3693   | 10714 IPF10714   | CONTROL molecular_function unknown                                                                      |
| CA2107 | 1.4 | 1.0 | 0.9 | 0.7 | IPF10716   | complemer unknown function orf19.3691           | 10716 IPF10716   | UNCLASSI molecular_function unknown                                                                     |
| CA2108 | 0.7 |     |     | 1.0 | RPL26A.3   | 8001738..8 ribosomal protein, 3-prime end (by I | 10719 CaRPL26A   | PROTEIN ' RNA binding                                                                                   |
| CA2109 | 2.6 | 2.5 | 1.7 | 1.3 | IPF13749.5 | 8003001..8 unknown function, 5-pr orf19.3690    | 13749 IPF13749.5 | C-compou molecular_function unknown                                                                     |
| CA2110 | 2.2 | 1.2 | 2.0 | 1.6 | IPF13749.3 | 8004053..8 unknown function, 3-pr orf19.3689    | 18544 IPF13749.3 | C-compound and carbohydrate metabolism ENERGY                                                           |
| CA2111 | 0.8 | 1.2 | 1.1 | 0.9 | IPF13748   | 8004941..8 unknown function orf19.3688          | 13748 IPF13748   | UNCLASSI molecular_function unknown                                                                     |
| CA2112 | 0.8 | 0.9 | 1.0 | 1.1 | PFD1       | complemer Prefoldin subunit 1 (by orf19.3687    | 13747 CaPFD1     | PROTEIN I chaperone activity                                                                            |
| CA2113 | 1.2 | 1.0 | 1.0 | 0.9 | ATP12      | 8005890..8 F1FO-ATPase complex orf19.3686       | 13746 CaATP12    | PROTEIN I chaperone activity                                                                            |
| CA2114 | 1.1 | 0.9 | 1.0 | 0.9 | IPF13744   | 8007912..8 protein involved in regt orf19.3685  | 13744 IPF13744   | C-compou molecular_function unknown                                                                     |
| CA2115 | 1.0 | 1.0 | 1.1 | 0.9 | IPF8030    | 8014628..8 unknown function orf19.8911          | 8030 IPF8030     | CELL CYC molecular_function unknown                                                                     |
| CA2116 | 1.2 | 0.9 | 0.9 | 0.8 | SNG4       | complemer Drug transporter (by h orf19.1332     | 8028 CaSNG4      | CELL RESCUE DEFENSE AND VIRULENCE                                                                       |
| CA2117 | 0.6 | 0.8 | 1.1 | 0.9 | SNG3       | 8018926..8 Drug transporter (by h orf19.1333    | 8025 CaSNG3      | CELL RESCUE DEFENSE AND VIRULENCE ""TRANSPORT FACILITATION                                              |
| CA2118 | 1.2 | 0.9 | 1.0 | 0.9 | IPF8024    | 8023334..8 unknown function orf19.1334          | 8024 IPF8024     | No significant S.c. match                                                                               |
| CA2119 | 1.1 | 1.0 | 1.1 | 1.0 | MTR4       | 8025570..8 RNA Helicase (by hom orf19.8915      | 8020 CaMTR4      | TRANSCR RNA binding,helicase activity                                                                   |
| CA2120 | 1.0 | 0.9 | 1.1 | 1.2 | PUP3       | 8029039..8 PRCT yeast proteasome componen       | 8017 CaPUP3      | PROTEIN I peptidase activity                                                                            |
| CA2121 | 0.8 | 1.0 | 1.0 | 1.1 | IPF7930    | 8030927..8 unknown function orf19.8918          | 7930 IPF7930     | UNCLASSI molecular_function unknown                                                                     |
| CA2122 | 1.4 | 1.3 | 1.0 | 1.2 | CPY1.3f    | complemer Carboxypeptidase Y pr orf19.8919      | 18540 CaCPY1.3f  | PROTEIN FATE [folding modification destination] ""SUBCELLULAR LOCALISATION                              |
| CA2124 | 4.0 | 1.6 | 2.4 | 1.4 | IPF10490   | complemer unknown function orf19.8049           | 10490 IPF10490   | No significant S.c. match                                                                               |
| CA2125 | 1.2 | 1.3 | 1.2 | 1.0 | IPF4893    | 8040201..8 unknown function orf19.418           | 4893 IPF4893     | UNCLASSI protein binding                                                                                |
| CA2126 | 1.1 | 0.8 |     | 0.9 | IPF4896    | 8045299..8 unknown function orf19.417           | 4896 IPF4896     | CELLULAF transporter activity                                                                           |
| CA2127 | 1.3 | 1.0 | 1.0 | 1.0 | IPF4897    | complemer unknown function orf19.416            | 4897 IPF4897     | No significant S.c. match                                                                               |
| CA2128 | 0.7 | 1.1 | 0.9 | 1.4 | IPF4898    | complemer unknown function orf19.415            | 4898 IPF4898     | UNCLASSI molecular_function unknown                                                                     |
| CA2129 | 1.0 | 1.0 | 1.2 | 1.1 | IPF4899    | 8048921..8 unknown function orf19.414           | 4899 IPF4899     | UNCLASSI structural molecule activity                                                                   |
| CA2130 | 1.5 | 1.1 | 1.0 | 0.8 | RPS27A     | complemer ribosomal protein S27.e (by homolog   | 4901 CaRPS27A    | PROTEIN SYNTHESIS SUBCELLULAR LOCALISATION                                                              |
| CA2131 | 1.3 | 1.0 | 1.2 | 0.9 | IDP1       | complemer isocitrate dehydrogena orf19.5211     | 5863 CaIDP1      | C-compound and carbohydrate metabolism ENERGY SUBCELLULAR LOCALISATION                                  |
| CA2132 | 1.1 | 0.9 | 1.0 | 1.0 | IPF5865    | 8057765..8 unknown function orf19.5212          | 5865 IPF5865     | CELL CYC DNA binding                                                                                    |
| CA2133 | 0.8 | 1.0 | 1.0 | 1.1 | IPF5866    | 8059498..8 unknown function orf19.5213          | 5866 IPF5866     | TRANSCRIPTION SUBCELLULAR LOCALISATION                                                                  |
| CA2134 | 0.8 | 1.1 | 1.0 | 1.4 | COX8       | complemer CYTOCHROME C OX orf19.5213            | 5867 CaCOX8      | ENERGY ' oxidoreductase activity                                                                        |
| CA2135 | 0.5 | 0.9 | 1.0 | 1.0 | COX9       | 8062863..8 CYTOCHROME C OXIDASE (by ho          | 5868 CaCOX9      | ENERGY " oxidoreductase activity                                                                        |
| CA2136 | 1.4 | 0.9 | 1.1 | 0.8 | VPS33      | complemer VACUOLAR PROTEIN orf19.5214           | 5870 CaVPS33     | PROTEIN FATE [folding modification destination] ""CELLULAR TRANSPORT AND TRANSPORT MECHANISMS CONTROL C |

|        |      |     |      |     |            |                                                 |                  |                                                                                                                        |
|--------|------|-----|------|-----|------------|-------------------------------------------------|------------------|------------------------------------------------------------------------------------------------------------------------|
| CA2137 | 0.8  | 1.0 | 1.0  | 1.0 | ARP9       | 8076550..8actin-related protein (b orf19.2507   | 15652 CaARP9     | SUBCELLL transcription regulator activity                                                                              |
| CA2139 | 0.9  | 1.0 | 0.9  | 0.8 | IPF15654.€ | complemer unknown function, exo orf19.2509      | 15654 IPF15654.€ | No significant S.c. match                                                                                              |
| CA2140 | 1.4  | 1.0 | 1.1  | 1.2 | IPF19665   | complemer unknown function orf19.10046          | 19665 IPF19665   | CELL CYC chaperone activity                                                                                            |
| CA2141 | 1.6  | 1.2 | 1.1  | 1.0 | IPF19664   | complemer unknown function orf19.10047          | 19664 IPF19664   | CELL CYCLE AND DNA PROCESSING SUBCELLULAR LOCALISATION                                                                 |
| CA2142 | 1.0  | 1.0 | 0.9  | 1.1 | MRPL33     | 8084879..8ribosomal protein of the large subun  | 15872 CaMRPL33   | PROTEIN † structural molecule activity                                                                                 |
| CA2143 | 0.6  | 1.0 | 2.9  | 1.1 | IPF12803   | 8087503..8unknown function orf19.10048          | 12803 IPF12803   | No significant S.c. match                                                                                              |
| CA2144 | 1.4  | 1.0 | 0.8  | 0.8 | IPF12802   | complemer unknown function orf19.2513           | 12802 IPF12802   | PROTEIN FATE [folding modification destination] ""SUBCELLULAR LOCALISATION                                             |
| CA2145 | 1.2  | 1.3 | 0.9  | 1.1 | IPF12800   | 8090630..8unknown function orf19.2514           | 12800 IPF12800   | PROTEIN FATE [folding modification destination]                                                                        |
| CA2146 | 2.1  | 4.1 | 3.7  | 1.8 | IPF12799   | complemer unknown function orf19.2515           | 12799 IPF12799   | No significant S.c. match                                                                                              |
| CA2147 | 0.9  | 1.0 | 0.9  | 1.0 | IPF18533   | 8095958..8unknown function orf19.2516           | 18533 IPF18533   | Lipid fatty-acid and isoprenoid metabolism """"PROTEIN FATE [folding modification destination] ""SUBCELLULAR LOCALISAT |
| CA2148 | 0.5  | 1.0 | 1.1  | 1.0 | AUT1       | complemer similar to Saccharomy orf19.6020      | 10762 CaAUT1     | PROTEIN † molecular_function unknown                                                                                   |
| CA2149 | 0.8  | 0.7 | 1.0  | 0.8 | IPF10761   | complemer unknown function orf19.6021           | 10761 IPF10761   | No significant S.c. match                                                                                              |
| CA2150 | 1.0  | 0.8 | 0.8  | 1.2 | IPF19940   | 8108317..8unknown function orf19.6022           | 19940 IPF19940   | No significant S.c. match                                                                                              |
| CA2151 | 1.7  | 0.9 | 1.0  | 0.8 | ERC2       | complemer ethionine resistance pr orf19.6023    | 7898 CaERC2      | UNCLASSIFIED PROTEINS                                                                                                  |
| CA2152 | 0.8  | 1.0 | 1.1  | 0.9 | IPF7899    | complemer unknown function orf19.6024           | 7899 IPF7899     | No significant S.c. match                                                                                              |
| CA2153 | 0.7  | 1.0 | 0.9  | 1.0 | IPF7900    | complemer unknown function orf19.6025           | 7900 IPF7900     | UNCLASSI molecular_function unknown                                                                                    |
| CA2154 | 0.9  | 0.9 | 0.9  | 0.8 | ERG2       | 8115702..8C-8 sterol isomerase orf19.6026       | 7901 CaERG2      | Lipid fatty-€ isomerase activity                                                                                       |
| CA2155 | 0.5  | 0.9 | 1.1  | 1.2 | IPF7903    | complemer unknown function orf19.6027           | 7903 IPF7903     | CELL CYC structural molecule activity                                                                                  |
| CA2156 | 0.9  | 0.8 | 0.9  | 1.0 | IPF8535    | complemer unknown function orf19.5302           | 8535 IPF8535     | No significant S.c. match                                                                                              |
| CA2157 | 0.5  | 1.1 | 1.0  | 0.9 | IPF8537    | complemer similar to Saccharomy orf19.5300      | 8537 IPF8537     | SUBCELLL molecular_function unknown                                                                                    |
| CA2158 | 1.2  | 1.1 | 1.1  | 1.1 | ECM1       | complemer involved in cell wall bio orf19.5299  | 8538 CaECM1      | CONTROL molecular_function unknown                                                                                     |
| CA2159 | 1.0  | 0.9 | 1.2  | 1.2 | IPF19753   | complemer similar to Saccharomy orf19.5297      | 19753 IPF19753   | CELL CYC transcription regulator activity                                                                              |
| CA2160 | 1.1  | 1.1 | 0.9  | 0.8 | IPF15664   | 8131953..8unknown function orf19.5296           | 15664 IPF15664   | UNCLASSI molecular_function unknown                                                                                    |
| CA2161 | 0.7  | 1.2 | 1.0  | 1.2 | IPF11876   | 8133201..8unknown function orf19.5295           | 11876 IPF11876   | No significant S.c. match                                                                                              |
| CA2162 | 0.8  | 0.7 | 0.5  | 0.9 | PDB1       | complemer pyruvate dehydrogena orf19.5294       | 11877 CaPDB1     | C-compour oxidoreductase activity                                                                                      |
| CA2163 | 1.2  | 1.3 | 1.1  | 1.3 | IPF11879   | 8137348..8unknown function orf19.5293           | 11879 IPF11879   | No significant S.c. match                                                                                              |
| CA2164 | 1.2  | 0.9 | 0.6  | 0.9 | AXL2       | complemer similar to saccharomy orf19.5292      | 11881 CaAXL2     | CELL FAT† molecular_function unknown                                                                                   |
| CA2165 | 0.8  | 0.9 | 1.1  | 1.0 | IPF17024   | complemer unknown function orf19.5291           | 17024 IPF17024   | Lipid fatty-€ molecular_function unknown                                                                               |
| CA2166 | 1.1  | 0.9 | 0.8  | 0.8 | FEN12      | 8148907..8Probable subunit of 1,€ orf19.908     | 4547 CaFEN12     | C-compound and carbohydrate metabolism ""Lipid fatty-acid and isoprenoid metabolism ""CELL FATE SUBCELLULAR LOCAL      |
| CA2167 | 0.8  | 1.3 | 1.1  | 1.2 | IPF4553    | 8153414..8unknown function orf19.909            | 4553 IPF4553     | Amino acid molecular_function unknown                                                                                  |
| CA2168 | 1.0  | 1.1 | 1.0  | 0.8 | IPF4558    | complemer similar to Saccharomy orf19.910       | 4558 IPF4558     | TRANSCR RNA binding                                                                                                    |
| CA2169 | 1.9  | 1.5 | 1.0  | 1.1 | IPF4563.5f | 8159313..8similar to saccharomy orf19.911       | 4563 IPF4563.5f  | CELL CYCLE AND DNA PROCESSING                                                                                          |
| CA2170 | 2.8  | 1.1 | 2.1  | 1.4 | IPF4563.3f | 8164556..8similar to saccharomy orf19.912       | 18528 IPF4563.3f | CELL CYCLE AND DNA PROCESSING                                                                                          |
| CA2171 | 1.4  | 1.0 | 0.9  | 1.1 | PEP1.3     | 8166543..8Vacuolar protein sortin orf19.3767    | 15204 CaPEP1.3   | PROTEIN FATE [folding modification destination] ""CELLULAR TRANSPORT AND TRANSPORT MECHANISMS SUBCELLUL                |
| CA2172 | 1.1  | 0.6 | 0.7  | 0.8 | IPF15377   | 8173047..8probable membrane pro orf19.3765      | 15377 IPF15377   | UNCLASSI molecular_function unknown                                                                                    |
| CA2173 | 1.1  | 0.9 | 1.0  | 1.0 | IPF18527   | 8177798..8unknown function orf19.3764           | 18527 IPF18527   | CELL CYC molecular_function unknown                                                                                    |
| CA2174 | 1.0  | 0.9 | 1.1  | 1.1 | IPF20096   | complemer unknown function orf19.3763           | 20096 IPF20096   | No significant S.c. match                                                                                              |
| CA2175 | 1.1  | 1.0 | 1.1  | 0.8 | IPF8892    | 8181927..8unknown function orf19.3762           | 8892 IPF8892     | No significant S.c. match                                                                                              |
| CA2176 | 1.0  | 1.0 | 0.9  | 0.8 | CDC54      | complemer cell division control pro orf19.11245 | 8893 CaCDC54     | CELL CYC DNA binding                                                                                                   |
| CA2177 | 1.5  | 0.9 | 1.0  | 0.8 | ROD1       | complemer O-dinitrobenzene, calci orf19.9084    | 19576 CaROD1     | CELL RES molecular_function unknown                                                                                    |
| CA2178 | 1.1  | 1.1 | 1.0  | 1.0 | IPF9282    | complemer unknown function orf19.1510           | 9282 IPF9282     | UNCLASSI molecular_function unknown                                                                                    |
| CA2179 | 1.8  | 1.1 | 1.1  | 1.1 | FAB1       | complemer phosphatidylinositol 3-€ orf19.9088   | 9288 CaFAB1      | Lipid fatty-€ transferase activity                                                                                     |
| CA2180 |      |     |      |     | IPF9290    | 8207665..8208687                                |                  |                                                                                                                        |
| CA2181 | 0.1  | 0.7 | 0.4  | 1.0 | ECM331     | 8218869..8Involved in cell wall bic orf19.4255  | 6869 CaECM331    | CELL CYC molecular_function unknown                                                                                    |
| CA2182 | 0.9  | 1.0 | 1.3  | 1.0 | IPF6871    | complemer unknown function orf19.4253           | 6871 IPF6871     | Nucleotide metabolism SUBCELLULAR LOCALISATION                                                                         |
| CA2183 | 1.7  | 1.4 | 1.2  | 1.0 | IPF6872    | 8223014..8serine/threonine protei orf19.4252    | 6872 IPF6872     | CLASSIFIC protein kinase activity                                                                                      |
| CA2184 | 1.6  | 1.0 | 1.2  | 0.8 | IPF6874.3  | complemer unknown function, 3-pr orf19.4251     | 6874 IPF6874.3   | No significant S.c. match                                                                                              |
| CA2185 | 1.4  | 1.1 | 1.0  | 0.9 | IPF6880    | 8228949..8unknown function orf19.4247           | 6880 IPF6880     | No significant S.c. match                                                                                              |
| CA2186 | 0.6  | 1.3 | 0.8  | 1.2 | IPF6881    | complemer putative phosphatidyl s orf19.4246    | 6881 IPF6881     | UNCLASSIFIED PROTEINS                                                                                                  |
| CA2187 | 1.1  | 1.4 | 1.1  | 1.0 | IPF11667   | 8241456..8unknown function orf19.4771           | 11667 IPF11667   | PROTEIN FATE [folding modification destination]                                                                        |
| CA2188 | 0.7  | 1.5 | 1.4  | 1.3 | SSU81      | complemer protein involved in the orf19.4772    | 19612 CaSSU81    | CELL RES signal transducer activity                                                                                    |
| CA2189 | 0.5  | 1.0 | 0.8  | 0.9 | AOX2       | 8249622..8alternative oxidase (by orf19.4773    | 9420 CaAOX2      | No significant S.c. match                                                                                              |
| CA2190 | 0.9  | 1.0 | 1.0  | 1.0 | AOX1       | 8252054..8alternative oxidase (by orf19.4774    | 9418 CaAOX1      | No significant S.c. match                                                                                              |
| CA2191 | 1.1  | 1.2 | 1.0  | 1.0 | IPF9417    | 8255108..8similar to Saccharomy orf19.4775      | 9417 IPF9417     | CELL CYC DNA binding,transcription regulator activity                                                                  |
| CA2193 | 1.9  | 1.5 | 1.0  | 1.2 | IPF14273   | 8268453..8Probable ser/thr protei orf19.11824   | 14273 IPF14273   | CLASSIFIC protein kinase activity,signal transducer activity                                                           |
| CA2194 | 0.9  | 1.2 | 1.2  | 1.1 | RGR1       | 8271407..8DNA-directed RNA pol orf19.11825      | 14271 CaRGR1     | C-compour transcription regulator activity                                                                             |
| CA2195 | 0.7  | 1.2 | 1.0  | 1.0 | IPF18517.€ | complemer unknown function, 3-pr orf19.11826    | 16819 IPF18517.€ | UNCLASSI molecular_function unknown                                                                                    |
| CA2196 | 1.1  | 0.9 | 0.9  | 1.0 | IPF18517.€ | complemer unknown function, 5-pr orf19.11827    | 18517 IPF18517.€ | No significant S.c. match                                                                                              |
| CA2197 | 1.3  | 0.9 | 1.0  | 0.9 | IPF8110    | 8290521..8unknown function orf19.2936           | 8110 IPF8110     | No significant S.c. match                                                                                              |
| CA2198 | 0.5  | 0.5 | 0.6  | 0.8 | PMM1       | 8291882..8phosphomannomutase orf19.2937         | 8112 CaPMM1      | C-compour isomerase activity                                                                                           |
| CA2199 | 0.9  | 0.8 | 1.4  | 1.0 | IPF8113    | complemer unknown function orf19.2938           | 8113 IPF8113     | UNCLASSI molecular_function unknown                                                                                    |
| CA2200 | 1.1  | 1.1 | 1.0  | 0.9 | IPF8114    | 8295006..8unknown function orf19.2939           | 8114 IPF8114     | UNCLASSI molecular_function unknown                                                                                    |
| CA2201 | 1.3  | 1.1 | 0.9  | 0.8 | BOS1       | 8295935..8ER-to-Golgi v-SNARE orf19.2940        | 19943 CaBOS1     | CELLULAF transporter activity                                                                                          |
| CA2202 | 5.0  | 1.5 | 2.3  | 1.6 | SCW4       | 8298078..8cell wall glucanase (by orf19.2941    | 8122 CaSCW4      | CLASSIFICATION NOT YET CLEAR-CUT                                                                                       |
| CA2203 | 4.7  | 4.9 | 7.5  | 1.6 | DIP51.3F   | complemer dicarboxylic amino aci orf19.2942     | 8123 CaDIP51.3   | Amino acid transporter activity                                                                                        |
| CA2204 | 24.4 | 3.9 | 11.6 | 1.5 | DIP51.5F   | complemer dicarboxylic amino aci orf19.2943     | 10236 CaDIP51.5  | Amino acid metabolism SUBCELLULAR LOCALISATION TRANSPORT FACILITATION                                                  |
| CA2205 | 0.9  | 0.9 | 0.8  | 1.0 | SEO2       | complemer suppressor of sulfoxoy orf19.8319     | 12176 CaSEO2     | TRANSPO transporter activity                                                                                           |
| CA2206 | 0.9  | 1.0 | 1.1  | 0.8 | IPF12173   | 8311220..8unknown function orf19.698            | 12173 IPF12173   | UNCLASSI molecular_function unknown                                                                                    |
| CA2207 | 1.7  | 1.0 | 1.0  | 0.9 | IPF12169   | complemer unknown function orf19.8316           | 12169 IPF12169   | UNCLASSI molecular_function unknown                                                                                    |
| CA2208 | 0.4  | 1.0 | 1.3  | 1.1 | IPF17255   | complemer similar to Saccharomy orf19.696       | 17255 IPF17255   | CELLULAF signal transducer activity                                                                                    |
| CA2209 | 1.2  | 1.1 | 1.1  | 1.2 | IPF18512   | 8327154..8unknown function orf19.695            | 18512 IPF18512   | CELLULAF enzyme regulator activity                                                                                     |

|        |     |     |     |     |            |                                                 |             |       |            |                                                                                                                        |
|--------|-----|-----|-----|-----|------------|-------------------------------------------------|-------------|-------|------------|------------------------------------------------------------------------------------------------------------------------|
| CA2210 | 1.4 | 1.2 | 0.9 | 0.8 | MSL1       | complemer U2 snRNA-associated                   | orf19.4748  | 13925 | CaMSL1     | TRANSCR RNA binding                                                                                                    |
| CA2211 | 0.9 | 0.8 | 1.1 | 1.2 | IPF13921   | 8337732..8Unknown function                      | orf19.4749  | 13921 | IPF13921   | Lipid fatty-acid and isoprenoid metabolism """"PROTEIN FATE [folding modification destination] ""CELLULAR TRANSPORT AN |
| CA2212 | 0.6 | 1.1 | 0.9 | 1.2 | IPF13919   | complemer unknown function                      | orf19.4750  | 13919 | IPF13919   | UNCLASSIFIED PROTEINS                                                                                                  |
| CA2213 | 0.9 | 1.0 | 0.9 | 1.0 | IPF16405   | 8342422..8similar to saccharomyc                | orf19.4751  | 16405 | IPF16405   | UNCLASSIstructural molecule activity                                                                                   |
| CA2214 | 1.3 | 1.5 | 1.7 | 1.0 | IPF9939    | complemer similar to Saccharomyc                | orf19.4752  | 9939  | IPF9939    | C-compour DNA binding                                                                                                  |
| CA2215 | 1.4 | 1.0 | 0.9 | 1.0 | PFK26      | 8352093..8.6-phosphofructose-2-k                | orf19.4753  | 9943  | CaPFK26    | C-compour phospherase activity                                                                                         |
| CA2216 | 1.1 | 1.1 | 1.2 | 1.1 | IPF6235    | 8359756..8Candida albicans TCa2                 | orf19.5372  | 6235  | IPF6235    | No significant S.c. match                                                                                              |
| CA2217 | 1.1 | 1.1 | 1.0 | 1.0 | POL0       | 8360866..8.pol polyprotein, revers              | orf19.5373  | 6237  | CaPOL0     | UNCLASSIFIED PROTEINS                                                                                                  |
| CA2218 | 0.9 | 0.9 | 1.1 | 1.0 | IPF18508   | complemer unknown function                      | orf19.5375  | 18508 | IPF18508   | No significant S.c. match                                                                                              |
| CA2219 | 1.4 | 1.1 | 1.0 | 0.8 | CAT8       | complemer transcription factor invc             | orf19.12563 | 9674  | CaCAT8     | C-compour transcription regulator activity                                                                             |
| CA2220 | 1.6 | 1.2 | 1.2 | 1.1 | NTG1       | 8371878..8endonuclease III-like g               | orf19.5098  | 9671  | CaNTG1     | CELL CYC DNA binding                                                                                                   |
| CA2221 | 1.9 | 1.5 | 1.4 | 1.0 | IPF9670    | complemer membrane transporter                  | orf19.5100  | 9670  | IPF9670    | CELL RESCUE DEFENSE AND VIRULENCE ""TRANSPORT FACILITATION                                                             |
| CA2222 | 1.9 | 1.1 | 1.2 | 0.9 | CCR4       | 8379374..8.glucose-repressible alc              | orf19.5101  | 13962 | CaCCR4     | Amino acid RNA binding                                                                                                 |
| CA2223 | 0.9 | 1.1 | 0.9 | 1.3 | PLB5       | complemer putative phospholipase                | orf19.12568 | 13965 | CaPLB5     | Lipid fatty-acid and isoprenoid metabolism ""Other virulence attributes                                                |
| CA2224 | 1.0 | 1.0 | 1.3 | 0.9 | UGA6.3EO   | 8387122..8.GABA-specific transport protein, 3-p |             | 19944 | CaUGA6.3   | No significant S.c. match                                                                                              |
| CA2225 | 1.0 | 0.6 | 0.8 | 1.2 | SUR2       | 8389970..8.Hydroxylation of C-4 ol              | orf19.5818  | 5688  | CaSUR2     | Lipid fatty-oxidoreductase activity                                                                                    |
| CA2226 | 0.8 | 0.9 | 0.9 | 1.0 | BET3.EXO   | 8391526..8.targeting and fusion of              | orf19.5817  | 5686  | CaBET3.ex  | CELLULULAFmolecular_function unknown                                                                                   |
| CA2227 | 1.0 | 0.9 | 1.0 | 1.1 | EBP7       | complemer NADPH DEHYDROGE                       | orf19.5816  | 5684  | CaEBP7     | ENERGY                                                                                                                 |
| CA2228 | 0.9 | 1.2 | 1.2 | 0.9 | SCT12      | 8394867..8 Suppresses a choline-lorf            | orf19.5815  | 5683  | CaSCT12    | TRANSPORT FACILITATION                                                                                                 |
| CA2229 | 1.1 | 1.0 | 1.0 | 1.1 | IPF5682    | 8397606..8.unknown function                     | orf19.5814  | 5682  | IPF5682    | No significant S.c. match                                                                                              |
| CA2230 | 1.2 | 1.1 | 1.0 | 0.9 | IPF10936   | 8403208..8.unknown function                     | orf19.3928  | 10936 | IPF10936   | TRANSCRIPTION SUBCELLULAR LOCALISATION                                                                                 |
| CA2231 | 1.5 | 1.0 | 1.1 | 0.7 | IPF10934   | complemer similar to Saccharomyc                | orf19.3926  | 10934 | IPF10934   | Nucleotide RNA binding                                                                                                 |
| CA2232 | 0.9 | 1.0 | 0.7 | 1.1 | IPF10929   | 8406777..8.unknown function                     | orf19.3925  | 10929 | IPF10929   | CELL CYCLE AND DNA PROCESSING CELL FATE SUBCELLULAR LOCALISATION                                                       |
| CA2233 | 1.6 | 1.2 | 1.1 | 0.9 | IFJ3       | 8409384..8.unknown function                     | orf19.3924  | 10924 | CaIFJ3     | UNCLASSIFIED PROTEINS                                                                                                  |
| CA2234 | 1.3 | 1.4 | 1.1 | 1.0 | IPF10922   | 8411631..8.unknown function                     | orf19.3923  | 10922 | IPF10922   | No significant S.c. match                                                                                              |
| CA2235 | 0.6 | 0.7 | 1.0 | 0.9 | MPD1       | complemer disulfide isomerase rel               | orf19.3920  | 12689 | CaMPD1     | PROTEIN Ioxidoreductase activity,isomerase activity                                                                    |
| CA2236 | 0.8 | 1.1 | 0.9 | 1.2 | IFA23      | 8417177..8.unknown function                     | orf19.3919  | 12694 | CaIFA23    | CELL CYCLE AND DNA PROCESSING SUBCELLULAR LOCALISATION                                                                 |
| CA2237 | 0.8 | 0.8 | 0.8 | 0.9 | IPF10032.2 | complemer unknown function, 3-pr                | orf19.3917  | 12695 | IPF10032.2 | TRANSCRIPTION SUBCELLULAR LOCALISATION                                                                                 |
| CA2238 | 1.5 | 1.1 | 1.2 | 0.9 | IPF10032.1 | complemer unknown function, 5-pr                | orf19.3916  | 10032 | IPF10032.1 | UNCLASSImolecular_function unknown                                                                                     |
| CA2240 | 1.0 | 1.1 | 1.1 | 1.1 | CRD2       | 8423295..8Cu-binding metallothionein            |             | 17996 | CaCRD2     | No significant S.c. match                                                                                              |
| CA2241 | 1.3 | 0.9 | 1.1 | 0.9 | IFQ1.3F    | complemer Unknown function, 3-p                 | orf19.4674  | 7422  | CaIFQ1.3f  | No significant S.c. match                                                                                              |
| CA2242 | 0.9 | 0.9 | 0.9 | 1.1 | IFQ1.5F    | complemer Unknown function, 5-p                 | orf19.4673  | 7421  | CaIFQ1.5f  | No significant S.c. match                                                                                              |
| CA2243 | 1.2 | 0.8 | 1.0 | 1.1 | IPF7414    | 8431030..8.putative transcription f             | orf19.4670  | 7414  | IPF7414    | C-compound and carbohydrate metabolism TRANSCRIPTION                                                                   |
| CA2244 | 1.6 | 1.0 | 1.0 | 0.9 | AAT22      | complemer aspartate aminotransfe                | orf19.4669  | 7410  | CaAAT22    | Amino acid metabolism Nitrogen and sulphur metabolism SUBCELLULAR LOCALISATION                                         |
| CA2245 | 1.2 | 1.0 | 0.9 | 0.9 | IPF7409    | complemer unknown function                      | orf19.4668  | 7409  | IPF7409    | C-compound and carbohydrate metabolism SUBCELLULAR LOCALISATION                                                        |
| CA2246 | 0.3 | 0.9 | 0.8 | 0.8 | IPF7405    | complemer unknown function                      | orf19.4666  | 7405  | IPF7405    | No significant S.c. match                                                                                              |
| CA2247 | 1.2 | 1.0 | 1.0 | 0.8 | IPF7404    | complemer unknown function                      | orf19.12135 | 7404  | IPF7404    | No significant S.c. match                                                                                              |
| CA2248 | 0.6 | 1.0 | 1.1 | 0.9 | IPF11469   | 8445367..8.unknown function                     | orf19.9902  | 11469 | IPF11469   | No significant S.c. match                                                                                              |
| CA2249 | 0.9 | 0.7 | 1.0 | 1.1 | POL2       | complemer DNA-directed DNA pol                  | orf19.2365  | 14265 | CaPOL2     | CELL CYC nucleotidyltransferase activity                                                                               |
| CA2250 | 1.4 | 0.8 | 0.8 | 1.0 | MIS11      | 8455731..8.mitochondrial C1-tetra               | orf19.2364  | 12851 | CaMIS11    | Amino acid ligase activity                                                                                             |
| CA2251 | 0.9 | 1.0 | 0.9 | 1.2 | IPF12845   | 8459213..8.unknown function                     | orf19.2363  | 12845 | IPF12845   | PROTEIN Imolecular_function unknown                                                                                    |
| CA2252 | 1.4 | 1.0 | 1.0 | 0.8 | IPF12844   | complemer unknown function                      | orf19.9898  | 12844 | IPF12844   | UNCLASSImolecular_function unknown                                                                                     |
| CA2253 | 1.0 | 0.9 | 1.0 | 1.1 | IPF15485   | 8469219..8.unknown function                     | orf19.1959  | 15485 | IPF15485   | UNCLASSImolecular_function unknown                                                                                     |
| CA2254 | 0.8 | 0.9 | 1.0 | 1.1 | IPF15487   | 8470616..8.unknown function                     | orf19.1958  | 15487 | IPF15487   | No significant S.c. match                                                                                              |
| CA2255 | 0.8 | 0.9 | 0.8 | 1.2 | CYC3       | 8477757..8.cytochrome C heme ly                 | orf19.1957  | 13303 | CaCYC3     | Metabolism lyase activity                                                                                              |
| CA2256 | 1.4 | 1.0 | 0.9 | 0.8 | IPF14757   | complemer unknown function                      | orf19.1956  | 14757 | IPF14757   | UNCLASSImolecular_function unknown                                                                                     |
| CA2257 | 0.9 | 1.2 | 1.2 | 1.0 | SHR5       | 8481948..8.RAS suppressor (by h                 | orf19.1955  | 14758 | CaSHR5     | Nucleotide transferase activity                                                                                        |
| CA2258 | 1.3 | 0.9 | 1.0 | 0.9 | IFR1       | 8486422..8Unknown function                      | orf19.1763  | 17956 | CaIFR1     | SUBCELLULAR LOCALISATION                                                                                               |
| CA2259 | 1.4 | 1.0 | 0.9 | 0.9 | IPF6845    | complemer unknown function                      | orf19.1762  | 6845  | IPF6845    | UNCLASSIprotein phosphatase activity                                                                                   |
| CA2260 | 0.9 | 1.0 | 0.9 | 0.9 | OST2       | 8488973..8.Oligosaccharyltransfer               | orf19.1761  | 6848  | CaOST2     | C-compour transferase activity                                                                                         |
| CA2261 | 1.2 | 1.5 | 1.2 | 1.1 | RAS1       | complemer GTP-binding protein (b                | orf19.1760  | 6849  | CaRAS1     | Nucleotide hydrolase activity                                                                                          |
| CA2262 | 1.3 | 1.1 | 1.0 | 0.9 | IPF6857    | 8495988..8.putative transcriptional             | orf19.1757  | 6857  | IPF6857    | Amino acid DNA binding                                                                                                 |
| CA2263 | 0.8 | 0.9 | 1.4 | 1.1 | GPD1       | 8500901..8.Glycerol-3-phosphate                 | orf19.1756  | 6860  | CaGPD1     | C-compour oxidoreductase activity                                                                                      |
| CA2265 | 1.2 | 1.0 | 0.9 | 1.1 | CMK2       | complemer Ca2+/calmodulin-depe                  | orf19.1754  | 6866  | CaCMK2     | CELLULULAFprotein kinase activity                                                                                      |
| CA2266 | 1.2 | 1.0 | 0.7 | 1.2 | HEM1       | 8508965..8.5-aminolevulinic acid s              | orf19.10132 | 2755  | CaHEM1     | Metabolism transferase activity                                                                                        |
| CA2267 | 0.8 | 1.0 | 1.0 | 1.0 | IFU1.5F    | 8511139..8Unknown function, 5-p                 | orf19.2600  | 2757  | CaIFU1.5f  | CELL CYC structural molecule activity                                                                                  |
| CA2268 | 0.8 | 1.1 | 1.1 | 0.9 | IFU1.3F    | 8513229..8Unknown function, 3-prime end         |             | 18497 | CaIFU1.3f  | No significant S.c. match                                                                                              |
| CA2269 | 0.8 | 1.1 | 1.1 | 1.1 | YOR100     | 8514491..8.Putative mitochondrial               | orf19.2599  | 2761  | CaYOR100   | CELLULULAFtransporter activity                                                                                         |
| CA2270 | 0.8 | 0.8 | 0.9 | 1.2 | VMA4       | 8515783..8.H+-transporting ATPas                | orf19.2598  | 2763  | CaVMA4     | PROTEIN Itransporter activity                                                                                          |
| CA2271 | 1.0 | 1.0 | 1.0 | 0.8 | MRS2       | 8516787..8.Mitochondrial RNA spli               | orf19.2597  | 2765  | CaMRS2     | TRANSCR transporter activity                                                                                           |
| CA2272 | 0.7 | 1.0 | 0.9 | 0.9 | RPA43      | complemer DNA-directed RNA pol                  | orf19.2594  | 19945 | CaRPA43    | TRANSCR nucleotidyltransferase activity                                                                                |
| CA2273 | 0.7 | 1.0 | 0.9 | 1.1 | BIO2       | 8520374..8.biotin synthetase (by h              | orf19.2593  | 2771  | CaBIO2     | Metabolism transferase activity                                                                                        |
| CA2274 | 1.3 | 1.0 | 1.0 | 0.8 | BIO3       | complemer DAPA aminotransferas                  | orf19.2591  | 2774  | CaBIO3     | Metabolism transferase activity                                                                                        |
| CA2275 | 0.7 | 1.0 | 0.9 | 1.0 | BIO4       | 8523604..8.dethiobiotin synthetase              | orf19.2590  | 2776  | CaBIO4     | Metabolism ligase activity                                                                                             |
| CA2276 | 1.4 | 1.0 | 0.9 | 0.8 | HNM3       | 8524466..8.Choline permease (by                 | orf19.2587  | 2781  | CaHNM3     | CELLULAR TRANSPORT AND TRANSPORT MECHANISMS SUBCELLULAR LOCALISATION TRANSPORT FACILITATION                            |
| CA2277 | 1.1 | 1.2 | 0.9 | 0.9 | DRS21      | complemer Membrane-spanning Corf                | orf19.783   | 10810 | CaDRS21    | TRANSPO transporter activity                                                                                           |
| CA2278 | 1.1 | 0.9 | 1.1 | 1.1 | IPF10806   | 8533188..8.unknown function                     | orf19.782   | 10806 | IPF10806   | Lipid fatty-εmolecular_function unknown                                                                                |
| CA2279 | 0.9 | 0.9 | 1.0 | 1.2 | DUR31      | 8536333..8.Urea transport protein               | orf19.781   | 10804 | CaDUR31    | REGULATI transporter activity                                                                                          |
| CA2280 | 1.3 | 1.0 | 1.0 | 1.1 | DUR1,2     | 8539570..8.urea amidolyase (by h                | orf19.780   | 9766  | CaDUR1,2   | Amino acid hydrolase activity,ligase activity                                                                          |
| CA2281 | 1.6 | 1.0 | 1.1 | 0.9 | HAT1       | 8545321..8.histone acetyltransfera              | orf19.779   | 9767  | CaHAT1     | PROTEIN Itransferase activity                                                                                          |
| CA2282 | 1.1 | 0.9 | 1.1 | 1.1 | IPF14438   | 8548850..8.unknown function                     | orf19.12995 | 12637 | IPF14438   | No significant S.c. match                                                                                              |

|        |     |     |     |     |            |                                              |              |                  |                                                                                                  |
|--------|-----|-----|-----|-----|------------|----------------------------------------------|--------------|------------------|--------------------------------------------------------------------------------------------------|
| CA2283 | 1.0 | 1.2 |     | 1.1 | MRT4       | 8549818..8required for mRNA decorr           | orf19.12996  | 12634 CaMRT4     | Nucleotide molecular_function unknown                                                            |
| CA2284 | 0.9 | 1.4 | 1.3 | 0.9 | MIF2       | complemer required for normal chr            | orf19.5551   | 12632 CaMIF2     | CELL CYC DNA binding                                                                             |
| CA2285 | 1.4 | 1.5 | 1.3 | 0.9 | IPF12629   | complemer unknown function                   | orf19.5552   | 12629 IPF12629   | UNCLASSI molecular_function unknown                                                              |
| CA2286 | 1.2 | 1.1 | 0.7 | 1.1 | IPF5369    | 8555844..8unknown function                   | orf19.5553   | 5369 IPF5369     | UNCLASSI molecular_function unknown                                                              |
| CA2287 | 1.0 | 0.8 | 1.0 | 1.1 | IPF5373    | complemer unknown function                   | orf19.5555   | 5373 IPF5373     | C-compound and carbohydrate metabolism SUBCELLULAR LOCALISATION                                  |
| CA2288 | 0.9 | 0.8 | 0.9 | 0.9 | IPF5376    | 8563102..8unknown function                   | orf19.5557   | 5376 IPF5376     | PROTEIN FATE [folding modification destination]                                                  |
| CA2289 | 1.1 | 1.1 | 0.9 | 0.8 | RBF1.3     | complemer RPG-BOX-BINDING F                  | orf19.13004  | 5380 CaRBF1.3    | No significant S.c. match                                                                        |
| CA2290 | 3.0 | 1.2 |     | 1.1 | IPF16300   | complemer putative aldehyde dehy             | orf19.742    | 16300 IPF16300   | CLASSIFICATION NOT YET CLEAR-CUT                                                                 |
| CA2291 | 1.6 |     | 1.2 | 0.9 | IPF9740    | complemer oligo-1,4 -1,4-glucantr            | orf19.744    | 9743 IPF9740     | C-compour transferase activity                                                                   |
| CA2292 | 1.3 | 1.0 | 1.0 | 1.2 | VAC8       | 8585630..8required for vacuole inl           | orf19.745    | 9747 CaVAC8      | PROTEIN I protein binding                                                                        |
| CA2293 | 1.0 | 0.9 | 1.1 | 1.1 | IPF9748    | complemer unknown function                   | orf19.746    | 9748 IPF9748     | UNCLASSI molecular_function unknown                                                              |
| CA2294 | 1.2 | 1.1 | 0.6 | 1.2 | IPF19946   | complemer similar to Saccharomy              | orf19.747    | 19946 IPF19946   | SUBCELLL hydrolase activity                                                                      |
| CA2295 | 1.0 | 1.2 | 1.0 | 1.0 | HOS2       | complemer putative histone deace             | orf19.5377   | 8228 CaHOS2      | CELL CYC hydrolase activity                                                                      |
| CA2296 | 1.2 | 0.9 | 1.1 | 0.9 | SCL1       | 8601515..8Proteasome subunit Y               | orf19.5378   | 8226 CaSCL1      | PROTEIN I peptidase activity                                                                     |
| CA2297 | 0.7 | 0.5 | 0.5 | 0.8 | ERG4       | complemer sterol C-24 reductase              | (orf19.5379  | 8225 CaERG4      | Lipid fatty-z oxidoreductase activity                                                            |
| CA2298 | 1.9 | 1.1 | 1.4 | 0.9 | IPF8224    | complemer unknown function                   | orf19.5380   | 8224 IPF8224     | Amino acid metabolism TRANSCRIPTION SUBCELLULAR LOCALISATION UNCLASSIFIED PROTEINS               |
| CA2299 | 0.8 | 1.0 | 0.9 | 1.1 | IPF8222    | complemer unknown function                   | orf19.5381   | 8222 IPF8222     | TRANSCR RNA binding                                                                              |
| CA2300 | 2.1 | 1.9 | 0.7 | 0.7 | PMA1       | complemer plasma membrane H+                 | orf19.5383   | 8215 CaPMA1      | REGULATI transporter activity                                                                    |
| CA2302 | 0.8 | 0.9 | 1.0 | 0.9 | IPF6518    | 8629553..8unknown function                   | orf19.1691   | 6518 IPF6518     | UNCLASSIFIED PROTEINS                                                                            |
| CA2303 | 0.5 | 0.9 | 0.5 | 1.0 | TOS1       | complemer putative Anchor subun              | orf19.1690   | 6517 CaTOS1      | UNCLASSI molecular_function unknown                                                              |
| CA2304 | 1.0 | 1.3 | 0.9 | 1.1 | PRP43      | 8636365..8RNA-dependent ATPa                 | orf19.1687   | 6512 CaPRP43     | TRANSCR RNA binding,helicase activity                                                            |
| CA2305 | 0.6 | 1.0 | 1.0 | 1.0 | MPA43      | 8639114..8Unknown function                   | orf19.1686   | 6511 CaMPA43     | UNCLASSI molecular_function unknown                                                              |
| CA2306 | 1.1 | 1.0 | 1.1 | 1.1 | IPF6510    | 8641469..8unknown function                   | orf19.1685   | 6510 IPF6510     | TRANSCRIPTION SUBCELLULAR LOCALISATION                                                           |
| CA2307 | 1.2 | 0.9 | 1.0 | 1.0 | IPF18488.£ | 8642940..8unknown function, 5-prime end      |              | 18488 IPF18488.£ | No significant S.c. match                                                                        |
| CA2308 | 1.2 | 0.8 |     | 0.9 | IPF9874.3  | 8649277..8similar to Saccharomy              | orf19.8953   | 9874 IPF9874.3   | Lipid fatty-z hydrolase activity                                                                 |
| CA2309 | 1.5 | 1.0 | 1.1 | 0.9 | IPF9875    | complemer unknown function                   | orf19.1374   | 9875 IPF9875     | PROTEIN FATE [folding modification destination]                                                  |
| CA2310 | 4.0 | 1.5 | 2.2 | 1.1 | LEU42      | complemer 2-isopropylmalalate sy             | orf19.1375   | 9877 CaLEU42     | Amino acid metabolism SUBCELLULAR LOCALISATION                                                   |
| CA2311 | 0.8 | 0.5 | 0.6 | 0.7 | SSO2       | complemer syntaxin (by homology              | orf19.1376   | 16993 CaSSO2     | CELLULAF transporter activity                                                                    |
| CA2312 | 0.8 | 1.1 | 0.9 | 1.2 | IPF16498   | 8658174..8similar to Saccharomy              | orf19.1377   | 16498 IPF16498   | Amino acid transferase activity                                                                  |
| CA2313 | 1.5 | 1.1 | 1.2 | 0.9 | ERF3       | complemer translation release fact           | orf19.1378   | 19754 CaERF3     | CELL CYC translation regulator activity                                                          |
| CA2314 | 1.3 | 0.9 | 0.7 | 1.0 | IPF14545   | 8662058..8unknown function                   | orf19.1381   | 14545 IPF14545   | SUBCELLL molecular_function unknown                                                              |
| CA2315 | 0.9 | 1.0 | 1.0 | 1.0 | YEA4       | complemer Golgi uridine diphosph             | orf19.8962   | 14544 CaYEA4     | C-compour transporter activity                                                                   |
| CA2316 | 1.1 | 0.9 | 1.0 | 1.1 | IPF14542   | 8664812..8unknown function                   | orf19.8963   | 14542 IPF14542   | No significant S.c. match                                                                        |
| CA2317 | 0.8 | 1.0 | 0.9 | 1.0 | IPF13586   | complemer unknown function                   | orf19.5479   | 13586 IPF13586   | No significant S.c. match                                                                        |
| CA2318 | 1.2 | 0.8 |     | 1.1 | ILV1       | 8672919..8 Threonine dehydratase             | orf19.5480   | 16147 CaILV1     | Amino acid lyase activity                                                                        |
| CA2319 | 0.9 | 1.2 | 0.9 | 1.0 | GUF1       | complemer GTP-binding protein (b             | orf19.5483   | 19755 CaGUF1     | PROTEIN I hydrolase activity                                                                     |
| CA2320 | 1.2 | 1.0 | 0.9 | 0.8 | SER1       | complemer phosphoserine transan              | orf19.5484   | 10985 CaSER1     | Amino acid transferase activity                                                                  |
| CA2321 | 0.9 | 0.8 | 1.0 | 0.9 | MEC3       | complemer G2-specific checkpoint             | orf19.5485   | 10984 CaMEC3     | CELL CYC DNA binding                                                                             |
| CA2322 | 0.8 | 1.2 | 1.0 | 1.2 | YSH1       | 8679334..8component of pre-mRt               | orf19.5486   | 10981 CaYSH1     | TRANSCR RNA binding                                                                              |
| CA2323 | 0.9 | 0.9 | 0.7 | 1.0 | SMD2       | 8682305..8U1 snRNP protein of the Sm class p |              | 10980 CaSMD2     | TRANSCR RNA binding                                                                              |
| CA2324 | 1.0 | 1.0 | 0.9 | 0.8 | CDC46      | complemer cell division control pro          | orf19.5487   | 10979 CaCDC46    | CELL CYC DNA binding                                                                             |
| CA2325 | 0.9 | 0.8 | 1.1 | 1.0 | IPF10977   | 8685237..8unknown function                   | orf19.5488   | 10977 IPF10977   | CLASSIFIC molecular_function unknown                                                             |
| CA2326 | 3.1 | 1.4 | 1.5 | 1.0 | NUBM       | 8689792..8nucleotide-binding res             | orf19.11971  | 4781 CaNUBM      | No significant S.c. match                                                                        |
| CA2327 | 1.1 | 1.1 | 1.1 | 1.0 | IPF4782    | 8692371..8probable membrane pr               | orf19.11972  | 4782 IPF4782     | UNCLASSI molecular_function unknown                                                              |
| CA2328 | 1.1 | 1.1 | 1.1 | 1.1 | MED8       | complemer transcriptional regulati           | orf19.11973  | 4783 CaMED8      | TRANSCR transcriptional regulator activity                                                       |
| CA2329 | 1.4 | 1.0 |     | 0.9 | IPF4784    | 8694636..8unknown Function                   | orf19.4498   | 4784 IPF4784     | No significant S.c. match                                                                        |
| CA2330 | 0.8 | 1.3 | 0.9 | 1.2 | RIM2       | complemer mitochondrial carrier pi           | orf19.4499   | 4785 CaRIM2      | ENERGY C transporter activity                                                                    |
| CA2331 | 1.5 | 1.6 | 1.3 | 1.1 | MOT1       | complemer transcriptional accessc            | orf19.4502   | 4789 CaMOT1      | TRANSCR hydrolase activity                                                                       |
| CA2332 | 0.7 | 1.0 | 0.9 | 0.9 | IPF4792    | complemer unknown Function                   | orf19.11979  | 4792 IPF4792     | No significant S.c. match                                                                        |
| CA2333 | 1.1 | 0.8 | 1.1 | 1.0 | ADH4       | complemer probable alcohol dehy              | orf19.11980  | 4794 CaADH4      | C-compound and carbohydrate metabolism ENERGY SUBCELLULAR LOCALISATION UNCLASSIFIED PROTEINS     |
| CA2334 | 1.0 |     | 1.0 | 1.2 | ADH3       | complemer probable alcohol dehy              | orf19.11981  | 4795 CaADH3      | C-compound and carbohydrate metabolism ENERGY SUBCELLULAR LOCALISATION UNCLASSIFIED PROTEINS     |
| CA2335 | 1.4 | 1.3 | 1.1 | 1.3 | LYS21      | complemer homocitrate synthase               | (orf19.11982 | 18482 CaLYS21    | Amino acid metabolism C-compound and carbohydrate metabolism SUBCELLULAR LOCALISATION            |
| CA2336 | 1.8 | 1.3 | 1.0 | 1.2 | IPF13383.£ | complemer unknown function, inte             | orf19.2353   | 13383 IPF13383.£ | UNCLASSI molecular_function unknown                                                              |
| CA2337 | 0.6 | 0.9 | 1.1 | 0.9 | IPF13379   | 8716095..8unknown function                   | orf19.2352   | 13379 IPF13379   | UNCLASSI molecular_function unknown                                                              |
| CA2338 | 1.1 | 0.9 |     | 1.0 | NIT3       | complemer nitrilase (by homology)            | orf19.2351   | 13378 CaNIT3     | Nitrogen ar hydrolase activity                                                                   |
| CA2339 | 0.7 | 0.9 | 1.0 | 1.2 | IPF13377   | complemer unknown function                   | orf19.2350   | 13377 IPF13377   | CELL RESCUE DEFENSE AND VIRULENCE ""TRANSPORT FACILITATION                                       |
| CA2340 | 1.2 | 0.9 |     | 1.2 | MNN5       | complemer Golgi alpha-1,2-mann               | orf19.2347   | 15847 CaMNN5     | CELL FATE                                                                                        |
| CA2341 | 1.3 | 1.3 | 1.2 | 1.2 | IPF13838   | 8723633..8unknown function                   | orf19.2346   | 13838 IPF13838   | UNCLASSI molecular_function unknown                                                              |
| CA2342 | 1.4 | 1.8 | 1.5 | 1.0 | IPF13836   | complemer probable heat shock pr             | orf19.2344   | 13836 IPF13836   | No significant S.c. match                                                                        |
| CA2343 | 0.9 | 0.9 | 1.0 | 0.8 | IPF8671    | 8728909..8unknown function                   | orf19.2343   | 8671 IPF8671     | PROTEIN I protein binding                                                                        |
| CA2344 | 0.9 | 1.0 | 1.1 | 0.9 | SFT2       | 8730585..8similar to Saccharomy              | orf19.2342   | 8674 CaSFT2      | SUBCELLL molecular_function unknown                                                              |
| CA2345 | 0.9 | 1.0 |     | 1.2 | HNT1       | complemer similarity to protein Kin:         | orf19.2341   | 8675 CaHNT1      | Nucleotide hydrolase activity                                                                    |
| CA2346 | 1.3 | 1.0 | 1.0 | 0.9 | SEF1       | complemer Putative transcription f           | orf19.3753   | 7790 CaSEF1      | TRANSCR molecular_function unknown                                                               |
| CA2347 | 0.5 | 0.4 |     | 0.9 | RAD51      | complemer DNA repair protein by l            | orf19.3752   | 7787 CaRAD51     | CELL CYC DNA binding                                                                             |
| CA2348 | 2.2 | 1.0 | 0.9 | 0.9 | IPF12811   | 8745975..8putative serine/threon             | orf19.3751   | 12811 IPF12811   | CLASSIFIC protein kinase activity                                                                |
| CA2349 | 1.2 | 1.0 | 1.1 | 1.0 | IFC3       | complemer Unknown function                   | orf19.3749   | 12812 CaIFC3     | TRANSPO transporter activity                                                                     |
| CA2350 | 0.9 | 1.0 | 0.9 | 0.9 | CWH41.5E   | complemer ER glucosidase I, 5-pri            | orf19.4421   | 15907 CaCWH41.5E | C-compound and carbohydrate metabolism CONTROL OF CELLULAR ORGANIZATION SUBCELLULAR LOCALISATION |
| CA2351 | 0.6 | 0.9 | 1.0 | 1.0 | IPF19947   | 8754287..8unknown function                   | orf19.4420   | 19947 IPF19947   | TRANSCR transcription regulator activity                                                         |
| CA2352 | 1.0 | 1.0 | 1.0 | 1.0 | FMT1       | 8757080..8Methionyl-tRNA Transt              | orf19.4418   | 6482 CaFMT1      | TRANSCR transferase activity                                                                     |
| CA2353 | 0.9 | 1.3 | 1.1 | 1.0 | VPS13      | complemer involved in regulatin              | r orf19.4416 | 19756 CaVPS13    | PROTEIN I molecular_function unknown                                                             |
| CA2354 | 1.5 | 1.0 | 0.9 | 0.9 | IPF18480   | complemer unknown function                   | orf19.11893  | 18480 IPF18480   | No significant S.c. match                                                                        |



|        |     |     |     |     |            |                                                 |                  |                                                                                |
|--------|-----|-----|-----|-----|------------|-------------------------------------------------|------------------|--------------------------------------------------------------------------------|
| CA2355 | 1.1 | 1.0 | 1.0 | 1.1 | TPK1       | complemer cAMP-dependent prote orf19.12357      | 12285 CaTPK1     | TRANSCRIPTION REGULATION OF/INTERACTION WITH CELLULAR ENVIRONMENT              |
| CA2356 | 1.7 | 1.3 | 1.0 | 1.2 | IPF12282   | complemer unknown function orf19.4893           | 12282 IPF12282   | No significant S.c. match                                                      |
| CA2357 | 0.9 | 1.2 | 1.2 | 0.9 | IPF8957    | complemer unknown function orf19.4894           | 8957 IPF8957     | UNCLASSI molecular_function unknown                                            |
| CA2358 | 0.8 | 1.0 | 0.8 | 1.0 | IPF8953    | complemer unknown function orf19.4895           | 8953 IPF8953     | No significant S.c. match                                                      |
| CA2359 | 0.7 | 0.9 | 1.1 | 1.2 | IPF8952    | complemer similar to Saccharomy orf19.4896      | 8952 IPF8952     | TRANSCR nucleotidyltransferase activity                                        |
| CA2360 | 1.3 | 0.8 | 1.0 | 0.9 | IPF8951    | complemer unknown function orf19.4897           | 8951 IPF8951     | Lipid fatty-ε transporter activity                                             |
| CA2361 | 0.3 | 1.0 | 0.9 | 1.1 | IPF8950    | complemer unknown function orf19.12363          | 8950 IPF8950     | UNCLASSI molecular_function unknown                                            |
| CA2362 | 2.5 | 1.2 | 2.4 | 1.1 | IPF10595   | 8796680..8 unknown function orf19.1287          | 10595 IPF10595   | No significant S.c. match                                                      |
| CA2363 | 1.2 | 1.0 | 1.2 | 1.1 | IPF10590   | 8804440..8 unknown function orf19.1285          | 10590 IPF10590   | UNCLASSI molecular_function unknown                                            |
| CA2364 | 1.0 | 1.0 | 1.0 | 1.2 | MEC1       | complemer cell cycle checkpoint p orf19.8870    | 19757 CaMEC1     | CELL CYC transferase activity                                                  |
| CA2365 | 0.7 | 1.2 | 1.1 | 1.1 | CKS1       | complemer cyclin-dependent kinas orf19.1282     | 10371 CaCKS1     | CELL CYC enzyme regulator activity                                             |
| CA2366 | 1.2 | 1.1 | 1.1 | 0.9 | IPF10373   | complemer unknown function orf19.1281           | 10373 IPF10373   | UNCLASSI molecular_function unknown                                            |
| CA2367 | 0.3 | 0.9 | 0.5 | 1.0 | SUI1       | complemer translation initiation fac orf19.8867 | 10374 CaSUI1     | PROTEIN t translation regulator activity                                       |
| CA2368 | 1.2 | 1.0 | 1.1 | 1.3 | RPA190     | 8820119..8 DNA-directed RNA pol orf19.1839      | 10842 CaRPA190   | TRANSCR nucleotidyltransferase activity                                        |
| CA2369 | 0.6 | 2.1 | 1.0 | 1.2 | TBP1       | complemer TATA-binding protein orf19.1837       | 10845 CaTBP1     | TRANSCR DNA binding                                                            |
| CA2370 | 1.2 | 0.9 | 1.1 | 1.1 | APN2       | complemer AP endonuclease, exo orf19.1836       | 10847 CaAPN2     | CELL CYC hydrolase activity                                                    |
| CA2371 | 1.4 | 1.0 | 1.1 | 0.9 | IPF10333   | 8830210..8 unknown function orf19.1835          | 10333 IPF10333   | CELL FATt protein binding                                                      |
| CA2372 | 1.1 | 1.0 | 1.1 | 1.1 | IPF10335   | 8832527..8 unknown function orf19.1834          | 10335 IPF10335   | CELLULAR TRANSPORT AND TRANSPORT MECHANISMS SUBCELLULAR LOCALISATION           |
| CA2373 | 2.0 | 1.2 | 1.2 | 1.1 | CBF5       | complemer centromere/ microtubu orf19.1833      | 10336 CaCBF5     | CELL CYC lyase activity                                                        |
| CA2374 | 1.0 | 1.0 | 1.3 | 1.0 | FCY23      | complemer Putative purine-cytosin orf19.9390    | 10337 CaFCY23    | Nucleotide transporter activity                                                |
| CA2375 | 0.9 | 1.0 | 1.1 | 0.9 | IPF15504   | complemer unknown function orf19.2211           | 15504 IPF15504   | UNCLASSI molecular_function unknown                                            |
| CA2376 | 0.6 | 0.9 | 0.9 | 1.1 | IPF15506   | complemer unknown function orf19.2213           | 15506 IPF15506   | UNCLASSI molecular_function unknown                                            |
| CA2377 | 1.0 | 0.9 | 1.0 | 1.1 | MRPL7      | complemer Ribosomal protein of t orf19.2214     | 15259 CaMRPL7    | PROTEIN t structural molecule activity                                         |
| CA2378 | 0.6 | 1.1 | 1.1 | 1.1 | GLE1       | 8849231..8 RNA export mediator ( orf19.2215     | 15261 CaGLE1     | TRANSCR molecular_function unknown                                             |
| CA2379 | 1.0 | 0.9 | 1.0 | 1.0 | IPF4073    | complemer similar to Saccharomy orf19.2216      | 4073 IPF4073     | CELL CYC structural molecule activity                                          |
| CA2380 | 0.6 | 1.0 | 1.0 | 0.9 | IPF4072    | 8855132..8 unknown function orf19.2217          | 4072 IPF4072     | No significant S.c. match                                                      |
| CA2381 | 1.3 | 0.9 | 1.0 | 1.3 | YCK3.3F    | complemer casein kinase I, 3-prim orf19.2221    | 11642 CaYCK3.3f  | No significant S.c. match                                                      |
| CA2383 | 1.4 | 0.9 | 0.9 | 1.1 | IPF18474   | complemer unknown function orf19.2615           | 18474 IPF18474   | No significant S.c. match                                                      |
| CA2384 | 1.2 | 1.0 | 1.1 | 1.1 | MDL1       | complemer ATP-DEPENDENT PE orf19.2615           | 7801 CaMDL1      | TRANSPO transporter activity                                                   |
| CA2385 | 0.7 | 1.0 | 1.2 | 1.0 | RSR1.3     | complemer GTP-binding protein, 3 orf19.2614     | 8507 CaRSR1.3    | CELL FATt signal transducer activity                                           |
| CA2386 | 1.9 | 2.0 | 1.9 | 1.0 | ECM41.3    | complemer involved in cell wall bio orf19.2613  | 8505 CaECM41.3   | CONTROL molecular_function unknown                                             |
| CA2387 | 0.7 | 1.1 | 0.8 | 0.9 | IPF8504    | 8879599..8 unknown function orf19.2612          | 8504 IPF8504     | TRANSCRIPTION SUBCELLULAR LOCALISATION                                         |
| CA2388 | 0.7 | 1.0 | 0.9 | 1.0 | MCM6       | complemer component of MCM ini orf19.2611       | 8502 CaMCM6      | CELL CYC DNA binding                                                           |
| CA2389 | 0.7 | 1.1 | 1.0 | 0.9 | IPF8500    | 8883552..8 unknown function orf19.2610          | 8500 IPF8500     | TRANSCRIPTION SUBCELLULAR LOCALISATION                                         |
| CA2390 | 1.3 | 1.0 | 0.8 | 0.8 | CET1       | 8884285..8 mRNA 5-triphospha: orf19.2609        | 8499 CaCET1      | TRANSCR hydrolase activity                                                     |
| CA2391 | 1.1 | 1.2 | 2.0 | 1.3 | ADH5       | 8887692..8 probable alcohol dehy orf19.2608     | 15671 CaADH5     | C-compound and carbohydrate metabolism ENERGY SUBCELLULAR LOCALISATION         |
| CA2392 | 1.5 | 1.0 | 1.1 | 0.8 | IPF15672   | complemer unknown function orf19.10138          | 15672 IPF15672   | ENERGY                                                                         |
| CA2393 | 0.6 | 0.4 | 0.7 | 0.7 | RHO3       | complemer GTP-binding protein of orf19.11018    | 6422 CaRHO3      | CELL FATt signal transducer activity                                           |
| CA2394 | 0.7 | 0.9 | 1.0 | 0.7 | IPF6424    | complemer unknown function orf19.11019          | 6424 IPF6424     | UNCLASSIFIED PROTEINS                                                          |
| CA2395 | 0.7 | 0.9 | 1.0 | 1.1 | IPF6425    | complemer unknown function orf19.3536           | 6425 IPF6425     | UNCLASSI transferase activity                                                  |
| CA2396 | 0.8 | 0.9 | 1.1 | 1.0 | IPF6428    | complemer unknown function orf19.3537           | 6428 IPF6428     | UNCLASSI molecular_function unknown                                            |
| CA2397 | 1.3 | 1.0 | 1.0 | 0.7 | CFL12      | 8896757..8 Strong similarity to ferr orf19.3538 | 6430 CaCFL12     | REGULATION OF/INTERACTION WITH CELLULAR ENVIRONMENT Other virulence attributes |
| CA2398 | 0.8 | 0.9 | 0.9 | 1.0 | IPF6431    | complemer unknown function orf19.3539           | 6431 IPF6431     | UNCLASSI molecular_function unknown                                            |
| CA2399 | 1.0 | 1.2 | 1.1 | 1.0 | MAK5       | 8900492..8 ATP-dependent RNA t orf19.3540       | 6433 CaMAK5      | TRANSCR RNA binding, helicase activity                                         |
| CA2400 | 1.0 | 0.9 | 0.8 | 1.1 | SUP45      | complemer Translational release f orf19.3541    | 6434 CaSUP45     | PROTEIN t translation regulator activity                                       |
| CA2401 | 1.0 | 0.9 | 1.0 | 0.9 | LEM3       | 8904584..8 cell division cycle muta orf19.3542  | 6435 CaLEM3      | UNCLASSI transcription regulator activity                                      |
| CA2402 | 1.2 | 1.0 | 1.0 | 0.8 | IPF6437    | complemer unknown function orf19.3543           | 6437 IPF6437     | No significant S.c. match                                                      |
| CA2403 | 1.1 | 1.1 | 1.1 | 0.9 | IPF6438    | 8906519..8 unknown function orf19.3544          | 6438 IPF6438     | Lipid fatty-ε molecular_function unknown                                       |
| CA2405 | 1.0 | 0.8 | 0.8 | 0.9 | IPF3844    | 8915133..8 unknown function orf19.301           | 3844 IPF3844     | No significant S.c. match                                                      |
| CA2406 | 1.3 | 0.8 | 1.1 | 0.8 | AIP2       | complemer actin interacting protei orf19.300    | 3840 CaAIP2      | SUBCELLL oxidoreductase activity                                               |
| CA2407 | 1.6 | 1.9 | 1.5 | 1.1 | ECM14      | 8920404..8 carboxypeptidase invo orf19.299      | 3838 CaECM14     | CONTROL molecular_function unknown                                             |
| CA2408 | 0.8 | 1.1 | 1.0 | 1.1 | IPF3833    | complemer unknown function orf19.296            | 3833 IPF3833     | No significant S.c. match                                                      |
| CA2409 | 1.4 | 0.8 | 1.1 | 1.0 | IPF19948   | 8925564..8 unknown function orf19.291           | 19948 IPF19948   | UNCLASSI molecular_function unknown                                            |
| CA2411 | 1.1 | 1.0 | 1.0 | 0.9 | IFI3.3     | complemer Unknown function, 3-p orf19.4483      | 17915 CalFI3.3   | CLASSIFICATION NOT YET CLEAR-CUT                                               |
| CA2412 | 0.9 | 0.8 | 1.4 | 1.1 | IPF13755   | 8932229..8 unknown function orf19.4481          | 13755 IPF13755   | No significant S.c. match                                                      |
| CA2413 | 1.9 | 1.4 | 1.1 | 1.1 | IPF13756.ε | 8933487..8 unknown function, 5-pr orf19.4480    | 13756 IPF13756.ε | UNCLASSIFIED PROTEINS                                                          |
| CA2414 | 1.1 | 1.4 | 1.0 | 1.1 | IPF13756.ζ | 8934104..8 unknown function, 3-pr orf19.4479    | 13757 IPF13756.ζ | UNCLASSI molecular_function unknown                                            |
| CA2415 | 1.0 | 1.1 | 1.2 | 1.0 | MSD1       | complemer Aspartyl-tRNA synthet orf19.4478      | 17203 CaMSD1     | PROTEIN t ligase activity                                                      |
| CA2416 | 0.5 | 0.9 | 1.0 | 0.9 | IFD4       | 8938685..8 Putative aryl-alcohol d orf19.4477   | 14374 CalFD4     | C-compound and carbohydrate metabolism ENERGY                                  |
| CA2418 | 1.2 | 1.0 | 1.0 | 1.1 | MNT4       | 8942665..8 putative mannosyltrans orf19.4475    | 14377 CaMNT4     | C-compour transferase activity                                                 |
| CA2419 | 0.8 | 0.9 | 1.0 | 0.9 | IPF14379   | complemer unknown function orf19.4474           | 14379 IPF14379   | UNCLASSI molecular_function unknown                                            |
| CA2420 | 0.5 | 1.0 | 1.0 | 1.0 | SPC19      | complemer spindle pole body prote orf19.4473    | 15002 CaSPC19    | SUBCELLL structural molecule activity                                          |
| CA2421 | 1.3 | 1.0 | 1.0 | 1.0 | IPF14998   | 8947627..8 unknown function orf19.4471          | 14998 IPF14998   | UNCLASSI molecular_function unknown                                            |
| CA2422 | 1.0 | 0.9 | 1.0 | 1.0 | IPF14997   | 8950699..8 unknown function orf19.11950         | 14997 IPF14997   | No significant S.c. match                                                      |
| CA2423 | 1.7 | 1.9 | 1.4 | 1.1 | SDH41      | complemer succinate dehydrogen: orf19.11949     | 19574 CaSDH41    | C-compour oxidoreductase activity                                              |
| CA2424 | 0.9 | 1.1 | 1.0 | 0.9 | IPF18468   | complemer unknown function orf19.11948          | 18468 IPF18468   | No significant S.c. match                                                      |
| CA2425 | 1.2 | 0.9 | 1.0 | 0.9 | IPF9907    | 8956615..8 similar to Saccharomy orf19.10912    | 9907 IPF9907     | CELLULAF molecular_function unknown                                            |
| CA2426 | 0.9 | 0.8 | 1.1 | 1.0 | IPF9901    | 8959480..8 similar to Saccharomy orf19.3407     | 9901 IPF9901     | CELL CYC DNA binding                                                           |
| CA2427 | 1.4 | 1.1 | 0.9 | 0.8 | IPF9898    | complemer probable formate dehy orf19.3406      | 9898 IPF9898     | ENERGY transporter activity                                                    |
| CA2428 | 1.4 | 1.1 | 1.1 | 0.9 | IPF9894.3  | complemer unknown function, 3-pr orf19.3405     | 9894 IPF9894.3   | No significant S.c. match                                                      |
| CA2429 | 0.7 | 1.1 | 0.9 | 1.0 | IPF9890    | 8965711..8 unknown function orf19.3404          | 9890 IPF9890     | UNCLASSIFIED PROTEINS                                                          |

|        |     |     |     |     |          |                                            |             |       |            |                                                                                                             |
|--------|-----|-----|-----|-----|----------|--------------------------------------------|-------------|-------|------------|-------------------------------------------------------------------------------------------------------------|
| CA2430 | 1.2 | 1.1 | 1.0 | 0.9 | IPF12950 | complemer unknown function                 | orf19.3402  | 12950 | IPF12950   | No significant S.c. match                                                                                   |
| CA2431 | 0.7 | 1.0 | 1.0 | 1.1 | IPF12951 | 8968605..8 unknown function                | orf19.3401  | 12951 | IPF12951   | UNCLASSI molecular_function unknown                                                                         |
| CA2432 | 1.0 | 1.0 | 0.9 | 1.3 | COQ3     | complemer 3,4-dihydroxy-5-hexap            | orf19.3400  | 12953 | CaCOQ3     | Metabolism transferase activity                                                                             |
| CA2433 | 1.0 | 1.0 | 1.2 | 0.7 | IPF12959 | 8970442..8 unknown function                | orf19.3399  | 12959 | IPF12959   | UNCLASSI molecular_function unknown                                                                         |
| CA2434 | 0.7 | 1.0 | 1.0 | 1.0 | IPF9484  | complemer unknown function                 | orf19.3396  | 9484  | IPF9484    | UNCLASSIFIED PROTEINS                                                                                       |
| CA2435 | 1.3 | 1.0 | 1.1 | 0.7 | IPF9483  | complemer probable permease (b)            | orf19.10898 | 9483  | IPF9483    | CELL RES transporter activity                                                                               |
| CA2436 | 1.1 | 0.9 | 1.0 | 1.2 | IPF5500  | 8979991..8 unknown function                | orf19.2200  | 5500  | IPF5500    | UNCLASSI molecular_function unknown                                                                         |
| CA2437 | 1.2 | 1.3 | 1.1 | 1.3 | PHO86    | complemer inorganic phosphate tra          | orf19.2199  | 5501  | CaPHO86    | Phosphate molecular_function unknown                                                                        |
| CA2438 | 1.3 | 0.8 | 1.0 | 1.2 | IPF5505  | 8983829..8 unknown function                | orf19.2198  | 5505  | IPF5505    | UNCLASSIFIED PROTEINS                                                                                       |
| CA2439 | 1.2 | 0.9 | 0.9 | 1.2 | IPF7514  | 8986955..8 unknown function                | orf19.2197  | 7514  | IPF7514    | Nitrogen and sulphur metabolism                                                                             |
| CA2440 | 0.6 | 1.2 | 1.1 | 1.0 | IPF7513  | 8989114..8 unknown function                | orf19.2196  | 7513  | IPF7513    | UNCLASSI molecular_function unknown                                                                         |
| CA2441 | 1.2 | 0.9 | 1.0 | 1.0 | APM4     | 8990760..8 AP-2 complex subunit,           | orf19.2194  | 7509  | CaAPM4     | PROTEIN I molecular_function unknown                                                                        |
| CA2442 | 1.2 | 1.3 | 1.1 | 0.9 | PRS5     | 8992474..8 Phosphoribosylpyroph            | orf19.2193  | 7507  | CaPRS5     | Amino acid transferase activity                                                                             |
| CA2443 |     |     |     |     | YAF9     | 8997489..8998253                           |             |       |            |                                                                                                             |
| CA2444 | 1.1 | 1.0 | 0.8 | 1.2 | IPF13883 | complemer Unknown function                 | orf19.5502  | 13883 | IPF13883   | No significant S.c. match                                                                                   |
| CA2445 | 0.6 | 1.1 | 1.0 | 0.9 | IPF13885 | 8999951..9 unknown function                | orf19.5503  | 13885 | IPF13885   | No significant S.c. match                                                                                   |
| CA2446 | 1.3 | 1.0 | 1.0 | 1.0 | IPF2582  | 9002148..9 unknown function                | orf19.5504  | 2582  | IPF2582    | UNCLASSI molecular_function unknown                                                                         |
| CA2447 | 1.0 | 0.7 | 1.1 | 1.2 | HIS7     | 9005393..9 Histidine biosynthesis          | orf19.5505  | 2583  | CaHIS7     | Amino acid transferase activity                                                                             |
| CA2448 | 1.1 | 1.0 | 1.0 | 1.0 | PLC1     | 9007674..9 1-phosphatidylinositol-         | orf19.5506  | 2586  | CaPLC1     | Lipid fatty-ε hydrolase activity                                                                            |
| CA2449 | 1.2 | 0.9 | 0.7 | 1.1 | ENP1     | 9011266..9 Essential nuclear prote         | orf19.5507  | 2587  | CaENP1     | PROTEIN I RNA binding                                                                                       |
| CA2450 | 1.0 | 1.1 | 1.0 | 1.1 | IPF2589  | complemer unknown function                 | orf19.5508  | 2589  | IPF2589    | UNCLASSIFIED PROTEINS                                                                                       |
| CA2451 | 1.0 | 1.0 | 0.7 | 1.0 | IFB2     | complemer unknown function                 | orf19.5509  | 6648  | CaIFB2     | TRANSPORT FACILITATION                                                                                      |
| CA2452 | 1.7 | 0.7 | 0.9 | 0.8 | IPF9955  | complemer unknown function                 | orf19.10993 | 9955  | IPF9955    | No significant S.c. match                                                                                   |
| CA2453 | 0.9 | 0.8 | 0.8 | 0.9 | IPF9950  | 9026533..9 unknown function                | orf19.10995 | 9950  | IPF9950    | UNCLASSI molecular_function unknown                                                                         |
| CA2454 | 0.5 | 0.4 | 0.5 | 0.7 | RPL23B.3 | 9030804..9 ribosomal protein L23.          | orf19.3504  | 9946  | CaRPL23B   | PROTEIN I structural molecule activity                                                                      |
| CA2455 |     | 1.2 | 0.9 | 1.0 | IPF12228 | complemer unknown function                 | orf19.3505  | 12228 | IPF12228   | UNCLASSI molecular_function unknown                                                                         |
| CA2456 | 1.0 | 1.1 | 1.0 | 1.0 | DBR1     | complemer lariat-debranching enz           | orf19.3506  | 12230 | CaDBR1     | Nucleotide RNA binding                                                                                      |
| CA2457 | 0.9 | 1.4 | 1.0 | 1.2 | MCR1     | complemer NADH-cytochrome-b5               | orf19.3507  | 12231 | CaMCR1     | ENERGY I transporter activity                                                                               |
| CA2458 | 1.2 | 0.9 | 0.8 | 1.2 | IPF12233 | 9038767..9 unknown function                | orf19.3508  | 12233 | IPF12233   | UNCLASSI molecular_function unknown                                                                         |
| CA2459 | 1.1 | 1.0 | 0.8 | 1.0 | IPF12234 | 9040121..9 unknown function, 5-pr          | orf19.3509  | 12234 | IPF12234   | No significant S.c. match                                                                                   |
| CA2460 | 0.8 | 0.9 | 0.9 | 0.9 | LYS1.3E0 | 9040950..9 Saccharopine dehydrogenase, 3-p | orf19.3509  | 18465 | CaLYS1.3E0 | Amino acid metabolism SUBCELLULAR LOCALISATION                                                              |
| CA2461 | 1.0 | 1.0 | 0.9 | 0.9 | MAK11    | complemer involved in cell growth          | orf19.1791  | 8738  | CaMAK11    | CELL FATI molecular_function unknown                                                                        |
| CA2462 | 0.5 | 0.9 | 0.8 | 0.8 | CDC16    | 9042988..9 subunit of anaphase-p           | orf19.1792  | 8736  | CaCDC16    | CELL CYC protein binding                                                                                    |
| CA2463 | 1.4 | 1.1 | 0.9 | 0.8 | IPF8730  | 9048173..9 unknown function                | orf19.1793  | 8730  | IPF8730    | UNCLASSI molecular_function unknown                                                                         |
| CA2464 | 1.0 | 0.9 | 0.8 | 1.1 | IPF8727  | complemer unknown function                 | orf19.1794  | 8727  | IPF8727    | No significant S.c. match                                                                                   |
| CA2465 | 1.5 | 1.0 | 1.0 | 0.8 | IPF8726  | 9052094..9 unknown function                | orf19.1795  | 8726  | IPF8726    | Nucleotide RNA binding                                                                                      |
| CA2466 | 0.9 | 0.9 | 1.1 | 0.9 | IPF8725  | complemer unknown function                 |             | 8725  | IPF8725    | No significant S.c. match                                                                                   |
| CA2467 | 0.9 | 1.0 | 1.0 | 1.0 | IPF8724  | 9055895..9 unknown function                | orf19.1796  | 8724  | IPF8724    | C-compour oxidoreductase activity                                                                           |
| CA2468 | 1.2 | 1.1 | 1.0 | 1.1 | IPF8723  | complemer unknown function                 | orf19.1797  | 8723  | IPF8723    | No significant S.c. match                                                                                   |
| CA2469 | 1.0 | 1.1 | 1.3 | 1.1 | IPF7393  | complemer unknown function                 | orf19.9364  | 7393  | IPF7393    | UNCLASSIFIED PROTEINS                                                                                       |
| CA2470 | 2.8 | 2.1 | 2.2 | 1.1 | SDH12    | 9069926..9 Succinate dehydrogen            | orf19.10389 | 3247  | CaSDH12    | C-compound and carbohydrate metabolism ENERGY SUBCELLULAR LOCALISATION                                      |
| CA2471 | 0.8 | 0.9 | 0.9 | 1.0 | TOP2     | complemer Topoisomerase II                 | orf19.2873  | 3245  | CaTOP2     | CELL CYC isomerase activity                                                                                 |
| CA2472 | 1.1 | 0.9 | 1.1 | 1.0 | IPF3239  | complemer unknown function                 | orf19.2875  | 3239  | IPF3239    | PROTEIN FATE [folding modification destination] ""CELLULAR TRANSPORT AND TRANSPORT MECHANISMS SUBCELLUL     |
| CA2473 | 0.5 | 1.0 | 0.9 | 1.0 | CBF1     | complemer putative centromere bi           | orf19.2876  | 3238  | CaCBF1     | Amino acid DNA binding                                                                                      |
| CA2474 | 0.5 | 1.1 | 0.6 | 1.4 | PDC11    | 9080267..9 Pyruvate decarboxylas           | orf19.2877  | 3234  | CaPDC11    | C-compour lyase activity                                                                                    |
| CA2475 | 0.8 | 1.1 | 0.9 | 1.0 | IPF3233  | complemer unknown function                 | orf19.2878  | 3233  | IPF3233    | No significant S.c. match                                                                                   |
| CA2476 | 1.0 | 1.2 | 1.1 | 1.1 | IFF5     | 9085007..9 unknown function                | orf19.10397 | 15521 | CaIFF5     | C-compound and carbohydrate metabolism SUBCELLULAR LOCALISATION                                             |
| CA2477 | 1.4 | 1.4 | 0.9 | 1.1 | IPF16016 | complemer unknown function                 | orf19.10399 | 16016 | IPF16016   | UNCLASSIFIED PROTEINS                                                                                       |
| CA2478 | 1.0 | 0.8 | 0.9 | 0.9 | DAL52    | 9098997..9 allantate permease (t           | orf19.3208  | 14177 | CaDAL52    | CELLULAR TRANSPORT AND TRANSPORT MECHANISMS SUBCELLULAR LOCALISATION TRANSPORT FACILITATION                 |
| CA2479 | 1.1 | 0.9 | 0.9 | 1.1 | CCN1     | complemer G1 cyclin                        | orf19.3207  | 15597 | CaCCN1     | CELL CYCLE AND DNA PROCESSING ""CELL RESCUE DEFENSE AND VIRULENCE ""CELL FATE SUBCELLULAR LOCAL             |
| CA2480 | 0.8 | 1.1 | 0.9 | 1.3 | CCT7     | complemer component of chapero             | orf19.10718 | 9837  | CaCCT7     | PROTEIN I chaperone activity                                                                                |
| CA2481 | 1.4 | 1.1 | 1.0 | 1.1 | MRPL36   | 9107958..9 ribosomal protein YmL           | orf19.3205  | 9838  | CaMRPL36   | PROTEIN I structural molecule activity                                                                      |
| CA2482 | 1.4 | 1.0 | 1.1 | 1.3 | IPF9841  | complemer unknown function                 | orf19.3204  | 9841  | IPF9841    | CELL CYCLE AND DNA PROCESSING CONTROL OF CELLULAR ORGANIZATION SUBCELLULAR LOCALISATION                     |
| CA2483 | 0.7 | 1.1 | 0.9 | 1.2 | IPF19758 | complemer unknown function                 | orf19.3203  | 19758 | IPF19758   | UNCLASSI protein binding                                                                                    |
| CA2484 | 1.4 | 1.0 | 1.1 | 0.8 | IPF9846  | 9114239..9 unknown function                | orf19.10714 | 9846  | IPF9846    | UNCLASSIFIED PROTEINS                                                                                       |
| CA2485 | 0.6 | 1.0 | 0.9 | 1.0 | PAP12    | 9117478..9 poly(A) polymerase              | orf19.10713 | 9850  | CaPAP12    | TRANSCRIPTION SUBCELLULAR LOCALISATION                                                                      |
| CA2486 | 0.8 | 1.0 | 1.0 | 1.6 | IPF9851  | complemer unknown function                 | orf19.10712 | 9851  | IPF9851    | TRANSCR transcription regulator activity                                                                    |
| CA2487 | 0.9 | 0.9 | 1.0 | 1.0 | PIK1     | complemer phosphatidylinositol 4-l         | orf19.10711 | 9853  | CaPIK1     | Lipid fatty-ε transferase activity                                                                          |
| CA2488 | 1.3 | 1.4 | 1.1 | 1.0 | IPF17706 | 9125155..9 Unknown function                | orf19.10708 | 17706 | IPF17706   | No significant S.c. match                                                                                   |
| CA2489 | 1.1 | 1.6 | 1.1 | 1.0 | IPF7217  | complemer unknown function                 | orf19.11525 | 7217  | IPF7217    | TRANSCRIPTION                                                                                               |
| CA2490 | 0.5 | 1.1 | 1.1 | 1.1 | MUM2     | complemer ubiquitin C-terminal hy          | orf19.4044  | 7220  | CaMUM2     | CELL CYC molecular_function unknown                                                                         |
| CA2491 | 0.9 | 1.0 | 1.0 | 0.9 | IPF7221  | complemer unknown function                 | orf19.4046  | 7221  | IPF7221    | No significant S.c. match                                                                                   |
| CA2492 | 1.6 | 1.1 | 1.3 | 1.2 | IPF7224  | 9132913..9 putative telomere elong         | orf19.4045  | 7224  | IPF7224    | CELL CYC molecular_function unknown                                                                         |
| CA2493 | 0.8 | 0.8 | 0.8 | 0.9 | IPF7227  | 9134845..9 putative fatty acid des         | orf19.4048  | 7227  | IPF7227    | Lipid fatty-acid and isoprenoid metabolism """"CELL RESCUE DEFENSE AND VIRULENCE ""REGULATION OF/INTERACTIO |
| CA2494 | 0.7 | 0.9 | 0.9 | 1.0 | HTS1     | complemer histidine tRNA synthet           | orf19.4051  | 7230  | CaHTS1     | PROTEIN I ligase activity                                                                                   |
| CA2495 | 0.5 | 1.0 | 0.7 | 1.0 | CTA24    | complemer transcriptional regulat          | orf19.4054  | 7233  | CaCTA24    | No significant S.c. match                                                                                   |
| CA2496 | 1.3 | 1.7 | 0.9 | 1.3 | IPF3468  | complemer unknown function                 | orf19.4055  | 3468  | IPF3468    | No significant S.c. match                                                                                   |
| CA2497 | 1.9 | 1.1 | 1.1 | 1.0 | TEL1.3E0 | 9147927..9 Putative phosphatidylil         | orf19.5580  | 15888 | CaTEL1.3E0 | Lipid fatty-ε transferase activity                                                                          |
| CA2498 | 1.4 | 1.0 | 0.9 | 1.0 | VPS181   | 9153846..9 vacuolar membrane pr            | orf19.5584  | 19951 | CaVPS181   | PROTEIN I protein binding                                                                                   |
| CA2499 | 0.9 | 0.9 | 1.2 | 0.9 | SAP5     | 9158571..9 secreted aspartyl prote         | orf19.5585  | 6816  | CaSAP5     | PROTEIN FATE [folding modification destination] ""Other virulence attributes                                |
| CA2500 | 1.2 | 1.1 | 0.9 | 0.8 | FIG4     | complemer suppressor of sac1 mu            | orf19.5586  | 6814  | CaFIG4     | CELLULAF hydrolase activity                                                                                 |

|        |     |     |     |     |            |                                                  |             |       |            |                                                                                                            |
|--------|-----|-----|-----|-----|------------|--------------------------------------------------|-------------|-------|------------|------------------------------------------------------------------------------------------------------------|
| CA2501 | 1.1 | 0.9 | 0.9 | 1.1 | IPF6812    | complemer unknown function                       | orf19.5587  | 6812  | IPF6812    | UNCLASSI protein binding                                                                                   |
| CA2502 | 0.9 | 1.0 |     | 1.0 | IPF20103   | 9166929..9 unknown function                      | orf19.5588  | 20103 | IPF20103   | No significant S.c. match                                                                                  |
| CA2503 | 1.1 | 0.9 | 0.9 | 1.1 | IPF6803.3f | 9171868..9 unknown function, 5-pr                | orf19.5592  | 6803  | IPF6803.3f | UNCLASSIFIED PROTEINS                                                                                      |
| CA2504 | 1.1 | 0.8 | 1.1 | 1.2 | IPF6803.3f | 9173034..9 unknown function, 3-pr                | orf19.5593  | 6801  | IPF6803.3f | No significant S.c. match                                                                                  |
| CA2505 | 1.1 | 0.8 | 0.9 | 1.2 | IPF6796    | 9175569..9 unknown function                      | orf19.5595  | 6796  | IPF6796    | CELL FAT1RNA binding                                                                                       |
| CA2506 | 1.0 | 0.9 | 1.2 | 1.1 | IPF6794    | complemer unknown function                       | orf19.5596  | 6794  | IPF6794    | TRANSCRIPTION                                                                                              |
| CA2507 | 1.0 | 1.0 | 1.0 | 1.2 | IPF18459.3 | 9179867..9 aldehyde dehydrogenase, 3-prime e     |             | 18459 | IPF18459.3 | CLASSIFICATION NOT YET CLEAR-CUT                                                                           |
| CA2508 | 0.8 | 1.0 | 0.9 | 1.1 | BET5       | 9181124..9 targeting and fusion of               | orf19.302   | 1468  | CaBET5     | CELLULAF molecular_function unknown                                                                        |
| CA2509 | 0.4 |     | 0.9 | 1.1 | IPF1471    | 9182324..9 aminotriazole resistant               | orf19.304   | 1471  | IPF1471    | CELL RES molecular_function unknown                                                                        |
| CA2510 | 1.0 | 1.1 | 1.2 | 1.2 | IPF1472    | 9184056..9 unknown function                      | orf19.305   | 1472  | IPF1472    | TRANSPORT FACILITATION                                                                                     |
| CA2511 | 1.4 | 1.0 | 1.0 | 0.9 | IPF1474    | 9185635..9 myosin-like protein                   | orf19.306   | 1474  | IPF1474    | CELLULAR TRANSPORT AND TRANSPORT MECHANISMS SUBCELLULAR LOCALISATION                                       |
| CA2512 | 1.4 | 1.0 | 1.0 | 0.7 | HFI1       | complemer Putative transcriptional               | orf19.307   | 1476  | CaHFI1     | TRANSCR transcription regulator activity                                                                   |
| CA2513 | 1.2 | 1.0 | 1.1 | 1.2 | SNG1       | 9190417..9 Involved in nitroguanid               | orf19.308   | 1478  | CaSNG1     | CELL RES molecular_function unknown                                                                        |
| CA2514 | 1.0 | 0.9 | 1.2 | 1.0 | FUR4       | complemer Probable uracile or alle               | orf19.313   | 1484  | CaFUR4     | CELLULAF transporter activity                                                                              |
| CA2515 | 1.4 | 1.0 | 1.1 | 1.1 | IPF19759   | 9200705..9 Unknown Function                      | orf19.5510  | 19759 | IPF19759   | TRANSCR molecular_function unknown                                                                         |
| CA2516 | 0.9 | 1.0 | 1.0 | 1.0 | IPF4301    | complemer unknown function                       | orf19.5513  | 4310  | IPF4301    | TRANSCR transcription regulator activity                                                                   |
| CA2517 | 1.4 | 0.9 | 1.0 | 1.0 | IPF4311    | 9205609..9 unknown function                      | orf19.5514  | 4311  | IPF4311    | No significant S.c. match                                                                                  |
| CA2518 | 0.8 | 1.0 | 1.0 | 1.0 | CBP3       | complemer involved in cytochrome                 | orf19.5515  | 4312  | CaCBP3     | PROTEIN I molecular_function unknown                                                                       |
| CA2519 | 1.1 | 0.9 | 1.0 | 1.1 | SRP72      | 9207788..9 signal recognition parti              | orf19.5516  | 4313  | CaSRP72    | PROTEIN FATE [folding modification destination] ""SUBCELLULAR LOCALISATION                                 |
| CA2520 | 0.9 | 1.0 | 0.8 | 0.8 | IPF20104   | 9211001..9 alcohol dehydrogenase                 | orf19.5517  | 20104 | IPF20104   | C-compour oxidoreductase activity                                                                          |
| CA2521 | 0.8 | 0.9 | 1.1 | 1.0 | IPF4317    | complemer unknown function                       | orf19.5518  | 4317  | IPF4317    | No significant S.c. match                                                                                  |
| CA2522 | 1.3 | 0.8 | 0.8 | 1.2 | GCV1       | complemer glycine cleavage T pro                 | orf19.5519  | 4318  | CaGCV1     | Amino acid oxidoreductase activity                                                                         |
| CA2523 | 0.7 | 0.9 | 1.3 | 0.9 | IPF4319    | complemer unknown function                       | orf19.5520  | 4319  | IPF4319    | No significant S.c. match                                                                                  |
| CA2524 | 1.1 | 0.9 | 1.2 | 1.0 | IPF4322    | 9217494..9 unknown function                      | orf19.5521  | 4322  | IPF4322    | REGULATI molecular_function unknown                                                                        |
| CA2525 | 1.0 | 0.7 | 1.0 | 1.0 | IPF4324.3  | complemer unknown function, 3-pr                 | orf19.5522  | 4324  | IPF4324.3  | No significant S.c. match                                                                                  |
| CA2526 | 1.0 | 0.9 | 0.9 | 0.8 | SEC20      | complemer secretory pathway prot                 | orf19.5526  | 4329  | CaSEC20    | PROTEIN I transporter activity                                                                             |
| CA2527 | 0.8 | 1.0 | 1.1 | 1.1 | IPF4331    | 9223521..9 unknown function                      | orf19.5527  | 4331  | IPF4331    | ENERGY RNA binding                                                                                         |
| CA2528 | 1.0 | 0.9 | 1.0 | 0.8 | MOB1       | complemer required for completior                | orf19.5528  | 4332  | CaMOB1     | CELL CYC enzyme regulator activity                                                                         |
| CA2530 | 0.9 | 1.2 | 1.2 | 1.1 | IPF12782   | 9229267..9 unknown function                      | orf19.3176  | 12782 | IPF12782   | UNCLASSI molecular_function unknown                                                                        |
| CA2531 | 1.7 | 1.1 | 1.0 | 0.8 | RIB2       | complemer DRAP deaminase (by I                   | orf19.3177  | 12784 | CaRIB2     | Metabolism lyase activity                                                                                  |
| CA2532 | 1.1 | 1.1 | 1.5 | 1.0 | PRP9       | complemer pre-mRNA splicing fac                  | orf19.3178  | 20105 | CaPRP9     | TRANSCR RNA binding                                                                                        |
| CA2533 | 0.8 | 1.2 | 0.9 | 1.1 | IPF12790   | 9234610..9 inositol polyphosphate                | orf19.3180  | 12790 | IPF12790   | Lipid fatty-ε hydrolase activity                                                                           |
| CA2534 | 1.8 | 1.5 |     | 0.9 | IPF12793   | complemer similar to Saccharomy                  | orf19.3182  | 12793 | IPF12793   | TRANSCR DNA binding,transcription regulator activity                                                       |
| CA2535 | 1.0 | 0.9 | 1.1 | 1.1 | NCE11      | 9237807..9 involved in non-classical protein exp |             | 20106 | CaNCE11    | CELLULAR TRANSPORT AND TRANSPORT MECHANISMS                                                                |
| CA2536 | 0.8 | 1.2 | 0.9 | 1.1 | IPF20107   | complemer unknown function                       | orf19.3183  | 20107 | IPF20107   | PROTEIN I molecular_function unknown                                                                       |
| CA2537 | 0.9 | 1.0 | 1.1 | 0.9 | IPF20108   | 9238983..9 similar to Saccharomy                 | orf19.3184  | 20108 | IPF20108   | SUBCELLULAR LOCALISATION                                                                                   |
| CA2538 | 0.9 | 1.1 | 1.3 | 1.1 | NAT1       | complemer Protein N-acetyltransfe                | orf19.3185  | 15324 | CaNAT1     | Lipid fatty-ε transferase activity                                                                         |
| CA2539 | 1.2 | 1.5 | 1.0 | 1.2 | IPF9188    | 9243131..9 unknown function                      | orf19.3187  | 9188  | IPF9188    | TRANSCRIPTION ""CELL RESCUE DEFENSE AND VIRULENCE ""SUBCELLULAR LOCALISATION                               |
| CA2541 | 1.2 | 1.2 |     | 1.3 | IPF9191.3f | 9247480..9 unknown function, 3-pr                | orf19.3188  | 9191  | IPF9191.3f | TRANSCRIPTION ""CELL RESCUE DEFENSE AND VIRULENCE ""SUBCELLULAR LOCALISATION                               |
| CA2542 | 1.2 | 1.0 | 0.9 | 0.9 | IPF16067   | 9251849..9 unknown function                      | orf19.3190  | 16067 | IPF16067   | TRANSCR transcription regulator activity                                                                   |
| CA2543 | 0.7 | 1.0 | 0.9 | 0.9 | IPF16925   | 9257179..9 unknown function                      | orf19.2828  | 16925 | IPF16925   | PROTEIN I chaperone activity                                                                               |
| CA2544 | 0.9 | 0.8 | 0.9 | 1.0 | IPF16924   | 9258342..9 unknown function                      | orf19.2829  | 16924 | IPF16924   | UNCLASSI molecular_function unknown                                                                        |
| CA2545 | 1.0 | 0.9 | 1.1 | 1.1 | RRP9       | 9259154..9 U3 small nucleolar ribc               | orf19.2830  | 15036 | CaRRP9     | TRANSCR RNA binding                                                                                        |
| CA2546 | 0.8 | 0.9 | 1.1 | 1.1 | RPC31      | complemer DNA-directed RNA pol                   | orf19.2831  | 15034 | CaRPC31    | TRANSCR nucleotidyltransferase activity                                                                    |
| CA2547 | 0.8 | 1.3 | 0.8 | 1.2 | IPF14911   | 9265854..9 unknown function                      | orf19.2832  | 14911 | IPF14911   | UNCLASSI molecular_function unknown                                                                        |
| CA2548 | 1.0 | 0.8 | 0.6 | 0.9 | IPF9101    | complemer unknown function                       | orf19.2833  | 9101  | IPF9101    | No significant S.c. match                                                                                  |
| CA2549 | 0.5 | 1.0 | 0.9 | 1.1 | RPD31      | complemer histone deacetylase B                  | orf19.2834  | 9100  | CaRPD31    | Phosphate metabolism CELL CYCLE AND DNA PROCESSING TRANSCRIPTION CELL FATE SUBCELLULAR LOCALISATIC         |
| CA2550 | 1.0 | 0.9 | 1.1 | 1.3 | IPF9099    | complemer similar to Saccharomy                  | orf19.2835  | 9099  | IPF9099    | PROTEIN FATE [folding modification destination]                                                            |
| CA2551 | 1.4 | 1.0 | 1.1 | 0.8 | IPF9098    | 9275206..9 unknown function                      | orf19.2836  | 9098  | IPF9098    | No significant S.c. match                                                                                  |
| CA2552 | 0.9 | 1.0 | 1.4 | 1.1 | ALG5       | complemer dolichol-P-glucose syn                 | orf19.2837  | 9097  | CaALG5     | C-compour transferase activity                                                                             |
| CA2553 | 1.6 | 1.1 | 1.0 | 0.8 | IPF9096    | complemer probable mannosidase                   | orf19.2838  | 9096  | IPF9096    | No significant S.c. match                                                                                  |
| CA2554 | 1.1 | 0.9 | 1.0 | 1.1 | CIRT4B     | 9280201..9 probable transposase                  | orf19.2839  | 9095  | CaCirt4b   | CELL CYCLE AND DNA PROCESSING SUBCELLULAR LOCALISATION                                                     |
| CA2555 | 1.5 | 0.9 | 1.4 | 0.9 | IPF12105   | complemer unknown function                       | orf19.5633  | 12105 | IPF12105   | C-compound and carbohydrate metabolism ENERGY SUBCELLULAR LOCALISATION                                     |
| CA2556 | 3.0 | 1.6 | 1.5 | 1.1 | FRE5       | complemer ferric reductase transr                | orf19.5634  | 12102 | CaFRE5     | REGULATION OF/INTERACTION WITH CELLULAR ENVIRONMENT Other virulence attributes                             |
| CA2557 | 0.3 | 0.7 | 0.3 | 1.1 | IPF12101   | 9287725..9 mycelial surface antige               | orf19.5635  | 12101 | IPF12101   | No significant S.c. match                                                                                  |
| CA2558 | 0.4 | 0.6 | 0.3 | 0.3 | RBT5       | 9289637..9 repressed by TUP1 pr                  | orf19.5636  | 19952 | CaRBT5     | No significant S.c. match                                                                                  |
| CA2559 | 1.0 | 1.1 | 0.9 | 1.3 | HIS4       | complemer Histidine biosynthesis                 | lorf19.5639 | 12359 | CaHIS4     | Amino acid oxidoreductase activity                                                                         |
| CA2560 | 1.4 | 1.9 | 1.1 | 0.9 | PEX5       | complemer peroxisomal targeting                  | orf19.5640  | 12357 | CaPEX5     | PROTEIN I signal transducer activity                                                                       |
| CA2561 | 1.0 | 1.2 | 1.7 | 1.0 | CAR2       | complemer ornithine aminotransfer                | orf19.5641  | 12355 | CaCAR2     | Amino acid transferase activity                                                                            |
| CA2562 | 0.2 | 0.8 | 0.9 | 1.1 | IPF19953   | 9297454..9 unknown function                      | orf19.5642  | 19953 | IPF19953   | No significant S.c. match                                                                                  |
| CA2563 | 1.4 | 1.0 | 1.1 | 0.8 | ECM7       | 9298071..9 cell wall biogenesis an               | orf19.5643  | 12129 | CaECM7     | CONTROL molecular_function unknown                                                                         |
| CA2564 | 1.0 | 1.1 | 1.3 | 1.2 | IPF12127   | 9299670..9 unknown function                      | orf19.5644  | 12127 | IPF12127   | UNCLASSI molecular_function unknown                                                                        |
| CA2565 | 1.0 | 0.8 | 0.9 | 0.8 | MET15      | complemer O-acetylhomoserine O                   | orf19.5645  | 12125 | CaMET15    | Amino acid transferase activity                                                                            |
| CA2566 | 1.0 | 0.9 | 1.0 | 1.1 | IPF12122   | 9302509..9 unknown function                      | orf19.5646  | 12122 | IPF12122   | UNCLASSI molecular_function unknown                                                                        |
| CA2567 | 0.5 | 0.8 | 1.2 | 1.3 | SUB2.3F    | complemer Involved in pre-mRNA                   | orf19.5647  | 12120 | CaSUB2.3f  | TRANSCR protein binding                                                                                    |
| CA2569 | 1.2 | 1.0 | 1.0 | 0.9 | IPF12117   | complemer unknown function                       | orf19.5648  | 12117 | IPF12117   | No significant S.c. match                                                                                  |
| CA2570 | 1.2 | 1.1 | 1.1 | 0.9 | PRO3       | complemer delta 1-pyrroline-5-car                | orf19.5650  | 12114 | CaPRO3     | Amino acid oxidoreductase activity                                                                         |
| CA2571 | 1.6 | 1.3 | 1.1 | 0.9 | IPF13769   | 9309333..9 unknown function                      | orf19.13590 | 13769 | IPF13769   | TRANSPo transporter activity                                                                               |
| CA2572 | 0.7 | 0.7 | 1.0 | 1.0 | IPF13766   | 9311002..9 unknown function                      | orf19.6211  | 13766 | IPF13766   | CELL CYCLE AND DNA PROCESSING ""PROTEIN FATE [folding modification destination] ""SUBCELLULAR LOCALISATION |
| CA2573 | 1.3 | 1.2 | 1.1 | 0.9 | SUI2       | complemer translation initiation fac             | orf19.6213  | 13764 | CaSUI2     | PROTEIN I translation regulator activity                                                                   |
| CA2574 | 1.7 | 1.2 |     | 1.2 | ATH1       | 9315495..9 acid trehalase, vacuole               | orf19.6214  | 19760 | CaATH1     | C-compour hydrolase activity                                                                               |

|        |     |     |     |     |           |                                                   |              |       |           |                                                                                                 |
|--------|-----|-----|-----|-----|-----------|---------------------------------------------------|--------------|-------|-----------|-------------------------------------------------------------------------------------------------|
| CA2575 | 0.5 | 0.9 | 1.1 | 1.3 | SEC31     | complemer Component of the COF                    | orf19.6217   | 7439  | CaSEC31   | CELLULAF structural molecule activity                                                           |
| CA2576 | 1.0 | 0.8 | 1.2 | 0.8 | IPF7432   | 9323625..9 unknown function                       | orf19.6219   | 7432  | IPF7432   | No significant S.c. match                                                                       |
| CA2577 | 1.3 | 1.0 | 1.2 | 0.9 | IPF7430   | 9325294..9 unknown function                       | orf19.6220   | 7430  | IPF7430   | UNCLASSI molecular_function unknown                                                             |
| CA2578 | 0.6 | 0.7 | 0.9 | 0.8 | MMD1.3    | 9328479..9 Maintenance of mitochondrial DNA,      |              | 7427  | CaMMD1.3  | CONTROL molecular_function unknown                                                              |
| CA2579 | 0.3 | 0.5 | 0.9 | 1.0 | RPL34B.3  | 9329645..9 Ribosomal protein L34.e, 3-prime er    |              | 7424  | CaRPL34B  | PROTEIN structural molecule activity                                                            |
| CA2581 | 0.4 | 1.0 | 1.2 | 1.0 | IPF9450   | 9330479..9 unknown function                       | orf19.4370   | 9450  | IPF9450   | No significant S.c. match                                                                       |
| CA2582 | 0.3 | 0.6 | 0.5 | 0.8 | TAL1      | 9335898..9transaldolase (by hom                   | orf19.4371   | 9448  | CaTAL1    | C-compour transferase activity                                                                  |
| CA2583 | 0.6 | 1.0 | 1.3 | 0.9 | IPF9445   | complemer unknown function                        | orf19.4372   | 9445  | IPF9445   | TRANSPORT FACILITATION                                                                          |
| CA2584 | 1.0 | 0.9 | 1.0 | 1.1 | IPF9440   | complemer similar to Saccharomyc                  | orf19.4373   | 9440  | IPF9440   | CLASSIFICtransferase activity                                                                   |
| CA2585 | 0.8 | 1.1 | 1.0 | 0.9 | IPF9438   | complemer similar to Saccharomyc                  | orf19.4374   | 9438  | IPF9438   | TRANSCR RNA binding                                                                             |
| CA2586 | 0.6 | 0.5 | 0.9 | 0.9 | IPF9435   | 9343175..9 unknown function                       | orf19.4375   | 9435  | IPF9435   | UNCLASSItransferase activity                                                                    |
| CA2587 | 0.6 | 0.7 | 1.3 | 1.1 | RPS30.3   | complemer 40S ribosomal protein S30, 3-prime      |              | 15100 | CaRPS30.  | PROTEIN structural molecule activity                                                            |
| CA2588 | 1.4 | 0.9 | 1.0 | 0.9 | IPF15098  | complemer Unknown function                        | orf19.4376   | 15098 | IPF15098  | No significant S.c. match                                                                       |
| CA2589 | 0.7 | 0.7 | 1.0 | 1.1 | KRE1      | complemer secretory pathway prot                  | orf19.4377   | 13702 | CaKRE1    | No significant S.c. match                                                                       |
| CA2590 | 1.3 | 1.0 | 0.9 | 0.8 | PPH3.3B   | complemer protein serine/threonin                 | orf19.4378   | 12918 | CaPPH3.3i | CELL FATE                                                                                       |
| CA2591 | 1.0 | 0.8 | 0.6 | 1.2 | IPF18448. | 9357618..9 unknown function, 3-pr                 | orf19.60     | 18448 | IPF18448. | SUBCELLULAR LOCALISATION UNCLASSIFIED PROTEINS                                                  |
| CA2592 | 1.0 | 1.1 | 1.1 | 1.1 | IPF18447  | complemer putative zinc-finger pro                | orf19.59     | 18447 | IPF18447  | UNCLASSI molecular_function unknown                                                             |
| CA2593 | 1.7 | 1.3 | 1.2 | 0.9 | RRP6      | 9359514..9 involved in 5.8S rRNA                  | orf19.58     | 12827 | CaRRP6    | UNCLASSIRNA binding                                                                             |
| CA2594 | 0.8 | 0.9 | 1.0 | 1.0 | IPF12824  | 9362616..9 unknown function                       | orf19.57     | 12824 | IPF12824  | UNCLASSIDNA binding                                                                             |
| CA2595 | 1.5 | 1.0 | 1.0 | 0.8 | ARG2      | 9363451..9 acetylglutamate synthe                 | orf19.56     | 12823 | CaARG2    | Amino acid transferase activity                                                                 |
| CA2596 | 0.8 | 1.0 | 0.9 | 0.9 | IPF19546  | 9365758..9 unknown function                       | orf19.55     | 19546 | IPF19546  | UNCLASSI molecular_function unknown                                                             |
| CA2597 | 1.0 | 1.3 | 1.2 | 1.2 | IFQ3      | complemer unknown function                        | orf19.54     | 13148 | CaIFQ3    | No significant S.c. match                                                                       |
| CA2598 | 1.2 | 1.0 | 1.0 | 0.8 | IPF13142  | 9371688..9 unknown function                       | orf19.53     | 13142 | IPF13142  | No significant S.c. match                                                                       |
| CA2599 | 0.8 | 1.0 | 0.9 | 1.2 | IPF11176  | 9373658..9 similar to Saccharomyc                 | orf19.52     | 11176 | IPF11176  | CELLULAF molecular_function unknown                                                             |
| CA2600 | 1.3 | 1.1 | 1.1 | 0.9 | IPF11177  | complemer similar to Saccharomyc                  | orf19.51     | 11177 | IPF11177  | PROTEIN molecular_function unknown                                                              |
| CA2601 | 1.2 | 1.3 | 1.0 | 1.1 | IPF11181  | 9381355..9 unknown function                       | orf19.50     | 11181 | IPF11181  | PROTEIN ligase activity                                                                         |
| CA2602 | 1.2 | 1.3 | 0.9 | 1.0 | IPF5473   | complemer unknown function                        | orf19.5679   | 5473  | IPF5473   | PROTEIN FATE [folding modification destination]                                                 |
| CA2603 | 1.3 | 1.0 | 1.0 | 0.8 | IPF5471   | complemer unknown function                        | orf19.5680   | 5471  | IPF5471   | No significant S.c. match                                                                       |
| CA2604 | 0.9 | 1.1 | 0.9 | 1.1 | IPF5469   | complemer unknown function                        | orf19.5681   | 5469  | IPF5469   | No significant S.c. match                                                                       |
| CA2605 | 1.3 | 0.9 | 1.0 | 0.8 | SRP1      | 9388143..9 alpha importin by hom                  | orf19.5682   | 5468  | CaSRP1    | PROTEIN protein binding                                                                         |
| CA2606 | 1.0 | 1.1 | 1.5 | 1.2 | IPF5466   | 9389917..9 unknown function                       | orf19.5683   | 5466  | IPF5466   | UNCLASSI molecular_function unknown                                                             |
| CA2607 | 0.6 | 0.7 | 1.1 | 0.9 | MRPL38    | 9390697..9 ribosomal protein of th                | orf19.5684   | 5464  | CaMRPL38  | PROTEIN structural molecule activity                                                            |
| CA2608 | 0.5 | 1.0 | 0.8 | 1.1 | THS1      | 9391498..9 threonyl tRNA synthet                  | orf19.5685   | 5462  | CaTHS1    | Nucleotide ligase activity                                                                      |
| CA2609 | 0.6 | 1.1 | 0.8 | 0.8 | IPF5457   | 9395086..9 similar to Saccharomyc                 | orf19.5689   | 5457  | IPF5457   | PROTEIN molecular_function unknown                                                              |
| CA2610 | 0.9 | 0.8 | 0.8 | 0.8 | CDC11     | complemer septin by homology                      | orf19.5691   | 5456  | CaCDC11   | C-compour structural molecule activity                                                          |
| CA2611 | 1.0 | 0.8 | 0.9 | 1.1 | IPF5453   | 9397365..9 unknown function                       | orf19.5692   | 5453  | IPF5453   | No significant S.c. match                                                                       |
| CA2612 | 0.3 | 0.7 | 0.8 | 1.2 | GAA1      | 9399699..9 required for attachmen                 | orf19.5693   | 5450  | CaGAA1    | Lipid fatty-εhydrolase activity                                                                 |
| CA2613 | 1.0 | 1.0 | 1.0 | 0.8 | IPF5446   | complemer putative ribosomal prot                 | orf19.5698   | 5446  | IPF5446   | PROTEIN structural molecule activity                                                            |
| CA2614 | 0.4 | 1.0 | 0.7 | 1.1 | CTA241.E  | complemer transcriptional activator, exon 2       |              | 5444  | CaCTA241  | No significant S.c. match                                                                       |
| CA2615 | 0.7 | 1.0 | 0.5 | 0.8 | CTA241.E  | complemer transcriptional activato                | orf19.5700   | 5443  | CaCTA241  | No significant S.c. match                                                                       |
| CA2616 | 1.5 | 1.0 | 1.0 | 0.9 | IPF3540   | 9407379..9 unknown function                       | orf19.2814   | 3540  | IPF3540   | No significant S.c. match                                                                       |
| CA2617 | 1.3 | 1.1 | 1.2 | 1.0 | IPF3539   | complemer unknown function                        | orf19.2813   | 3539  | IPF3539   | No significant S.c. match                                                                       |
| CA2618 | 1.1 | 0.9 | 0.9 | 0.9 | SNG2      | complemer drug transporter (by hc                 | orf19.2812   | 19762 | CaSNG2    | CELL RESCUE DEFENSE AND VIRULENCE ""TRANSPORT FACILITATION                                      |
| CA2619 | 2.1 | 1.2 | 1.4 | 1.4 | IPF9490   | complemer amino acid permease (                   | orf19.2810   | 9490  | IPF9490   | Amino acid metabolism CELLULAR TRANSPORT AND TRANSPORT MECHANISMS SUBCELLULAR LOCALISATION TRAN |
| CA2620 | 3.3 | 4.1 | 2.4 | 1.3 | IPF9496   | complemer carnitine O-acetyltrans                 | orf19.2809   | 9496  | IPF9496   | C-compour transferase activity                                                                  |
| CA2621 | 1.1 | 1.0 | 1.2 | 0.9 | IPF9499   | complemer probable transcription                  | orf19.2808   | 9499  | IPF9499   | C-compound and carbohydrate metabolism ENERGY TRANSCRIPTION SUBCELLULAR LOCALISATION            |
| CA2622 | 0.8 | 1.1 | 1.0 | 1.1 | PER3.EXO  | complemer peroxisomal import prc                  | orf19.2806   | 11531 | CaPER3.e  | No significant S.c. match                                                                       |
| CA2623 | 1.8 | 1.2 | 1.2 | 0.9 | PER3.EXO  | complemer peroxisomal import prc                  | orf19.10323  | 19631 | CaPER3.e  | No significant S.c. match                                                                       |
| CA2624 | 1.0 | 0.9 | 1.1 | 1.1 | ARG81.3E  | 9436131..9 transcription factor possibly involved |              | 17734 | CaARG81.  | Amino acid metabolism Nitrogen and sulphur metabolism TRANSCRIPTION SUBCELLULAR LOCALISATION    |
| CA2625 | 1.0 | 0.6 | 0.7 | 0.9 | IPF10919  | 9438459..9 Similar to Flo1p (by ho                | orf19.12229  | 10919 | IPF10919  | CONTROL molecular_function unknown                                                              |
| CA2626 | 0.9 | 0.9 | 0.9 | 1.1 | PAN2      | complemer component of Pab1p-s                    | orf19.4764   | 10918 | CaPAN2    | TRANSCR RNA binding                                                                             |
| CA2627 | 0.6 | 1.0 | 1.1 | 1.0 | IPF10916  | 9444414..9 unknown function                       | orf19.4763   | 10916 | IPF10916  | UNCLASSI molecular_function unknown                                                             |
| CA2628 | 0.7 | 0.7 | 1.1 | 1.0 | SIR22     | complemer canal regulatory protei                 | orf19.12225  | 10913 | CaSIR22   | TRANSCR hydrolase activity                                                                      |
| CA2629 | 1.0 | 0.7 | 1.0 | 0.9 | IPF10911  | 9448317..9 unknown function                       | orf19.12224  | 18440 | IPF10911  | UNCLASSItransferase activity                                                                    |
| CA2630 | 1.2 | 1.1 | 1.9 | 1.1 | COX5A     | 9450350..9 cytochrome-c oxidase                   | orf19.12223  | 10910 | CaCOX5A   | ENERGY εoxidoreductase activity                                                                 |
| CA2631 | 1.4 | 1.4 | 1.1 | 1.2 | IPF14389  | complemer ubiquinone oxidoreduc                   | orf19.4758   | 14389 | IPF14389  | No significant S.c. match                                                                       |
| CA2632 | 0.8 | 0.9 | 1.0 | 1.0 | NAR1      | complemer Yeast nuclear architect                 | orf19.4757   | 14388 | CaNAR1    | UNCLASSIoxidoreductase activity                                                                 |
| CA2633 | 0.9 | 1.2 | 0.9 | 1.2 | KEX2      | 9457875..9Kexin precursor (KEX2                   | orf19.4755   | 13063 | CaKEX2    | PROTEIN Ipeptidase activity                                                                     |
| CA2634 | 1.2 | 1.0 | 0.8 | 0.9 | ZWF1      | 9462347..9 glucose-6-phosphate c                  | orf19.12218  | 13060 | CaZWF1    | C-compour oxidoreductase activity                                                               |
| CA2635 | 1.0 | 1.0 | 0.9 | 1.0 | CKB22     | 9466876..9 Casein kinase II, beta                 | orf19.4297   | 2946  | CaCKB22   | TRANSCR protein kinase activity                                                                 |
| CA2636 | 1.4 | 0.9 | 1.1 | 0.9 | MSW1      | 9468015..9 Mitochondrial tryptoph                 | orf19.4299   | 2944  | CaMSW1    | PROTEIN ligase activity                                                                         |
| CA2637 | 1.3 | 1.1 | 1.1 | 1.0 | IPF19954  | 9470178..9 unknown function                       | orf19.4301   | 19954 | IPF19954  | No significant S.c. match                                                                       |
| CA2638 | 1.1 | 1.3 | 0.8 | 1.3 | GAP3      | complemer General amino acid pe                   | orf19.4304   | 2936  | CaGAP3    | Amino acid metabolism CELLULAR TRANSPORT AND TRANSPORT MECHANISMS SUBCELLULAR LOCALISATION TRAN |
| CA2639 | 1.4 | 1.0 | 0.9 | 0.9 | IPF2932   | complemer unknown function                        | orf19.4305   | 2932  | IPF2932   | CELLULAR TRANSPORT AND TRANSPORT MECHANISMS SUBCELLULAR LOCALISATION                            |
| CA2640 | 1.0 | 0.8 | 1.1 | 0.9 | IPF2930   | 9476075..9 Suppressor of PAB1 (by homology)       |              | 2930  | IPF2930   | TRANSCRIPTION                                                                                   |
| CA2641 | 0.8 | 0.9 | 0.9 | 1.0 | IPF2929   | complemer unknown function                        | orf19.4306   | 2929  | IPF2929   | UNCLASSI molecular_function unknown                                                             |
| CA2642 | 1.3 | 1.0 | 1.1 | 0.8 | FTI1      | 9477448..9 Rad52 inhibitor (by ho                 | orf19.4307   | 2927  | CaFTI1    | PROTEIN I molecular_function unknown                                                            |
| CA2643 | 0.6 | 0.9 | 1.0 | 1.1 | HSL1      | complemer Ser/thr protein kinase                  | t orf19.4308 | 2926  | CaHSL1    | CELL CYC protein kinase activity                                                                |
| CA2644 | 0.7 | 0.6 | 0.8 | 1.2 | GRP2      | complemer Reductase (by homolo                    | orf19.4309   | 2918  | CaGRP2    | Metabolism of vitamins cofactors and prosthetic groups                                          |
| CA2645 | 0.2 | 0.2 | 0.5 | 0.7 | YNK1      | 9488422..9 Nucleoside diphospat                   | orf19.4311   | 2914  | CaYNK1    | Nucleotide transferase activity                                                                 |
| CA2646 | 1.1 | 1.1 | 1.0 | 1.0 | IPF13089  | 9493426..9 unknown function                       | orf19.1185   | 13899 | IPF13089  | UNCLASSI molecular_function unknown                                                             |

|        |     |     |     |     |            |                                                  |             |       |            |                                                                                                         |
|--------|-----|-----|-----|-----|------------|--------------------------------------------------|-------------|-------|------------|---------------------------------------------------------------------------------------------------------|
| CA2647 | 0.7 | 1.1 | 0.8 | 1.2 | IPF13088   | 9494709..9unknown function                       | orf19.1186  | 13088 | IPF13088   | UNCLASSIFIED PROTEINS                                                                                   |
| CA2648 | 0.5 | 1.1 | 1.3 | 1.0 | IPF9062    | 9497177..9unknown function                       | orf19.1187  | 9062  | IPF9062    | CLASSIFICDNA binding,transcription regulator activity                                                   |
| CA2649 | 1.4 | 1.0 | 1.1 | 0.8 | IPF9057    | 9504384..9unknown function                       | orf19.1189  | 9057  | IPF9057    | CELL CYCLE AND DNA PROCESSING SUBCELLULAR LOCALISATION                                                  |
| CA2650 | 1.0 | 1.0 | 1.2 | 1.3 | STV1       | complemer H+-ATPase V0 domain                    | orf19.1190  | 13604 | CaSTV1     | PROTEIN FATE [folding modification destination] ""CELLULAR TRANSPORT AND TRANSPORT MECHANISMS REGULATIO |
| CA2651 | 1.0 | 0.7 | 0.9 | 1.0 | HRD3       | 9511782..9involved in HMG-CoA I                  | orf19.1191  | 13605 | CaHRD3     | PROTEIN I ligase activity                                                                               |
| CA2652 | 0.9 | 1.0 | 1.1 | 0.9 | DNA2       | complemer DNA helicase (by hom                   | orf19.1192  | 15025 | CaDNA2     | CELL CYC DNA binding,helicase activity                                                                  |
| CA2653 | 0.8 | 1.0 | 1.0 | 1.1 | IPF8472.3e | 9519932..9unknown function, 3-pr                 | orf19.5701  | 8472  | IPF8472.3e | UNCLASSIprotein binding                                                                                 |
| CA2654 | 1.0 | 0.8 | 0.8 | 0.9 | IPF8474    | complemer unknown function                       | orf19.5702  | 8474  | IPF8474    | UNCLASSImolecular_function unknown                                                                      |
| CA2655 | 0.8 | 0.9 | 0.9 | 1.0 | IPF8477    | 9526218..9unknown function                       | orf19.5704  | 8477  | IPF8477    | UNCLASSImolecular_function unknown                                                                      |
| CA2656 | 1.4 | 0.9 | 1.1 | 1.2 | NAM2       | complemer mitochondrial leucine--                | orf19.5705  | 19955 | CaNAM2     | TRANSCR RNA binding                                                                                     |
| CA2657 | 0.9 | 0.9 | 1.0 | 1.1 | IPF8486    | 9531702..9unknown function                       | orf19.5710  | 8486  | IPF8486    | TRANSCRIPTION CELLULAR TRANSPORT AND TRANSPORT MECHANISMS SUBCELLULAR LOCALISATION                      |
| CA2658 | 2.0 | 1.2 | 1.0 | 1.2 | IPF8105    | 9538183..9unknown function                       | orf19.5711  | 8105  | IPF8105    | Lipid fatty-ε transporter activity                                                                      |
| CA2659 | 0.8 | 0.9 | 0.9 | 1.2 | NDH2       | 9540741..9NADH dehydrogenase                     | orf19.5713  | 8102  | CaNDH2     | ENERGY SUBCELLULAR LOCALISATION                                                                         |
| CA2660 | 0.9 | 0.9 | 1.1 | 1.1 | SAP1       | complemer secreted aspartyl prote                | orf19.5714  | 8101  | CaSAP1     | PROTEIN FATE [folding modification destination] ""Other virulence attributes                            |
| CA2661 | 0.3 | 0.2 | 0.5 | 1.0 | AAT1       | 9551732..9aspartate aminotransfe                 | orf19.3554  | 14258 | CaAAT1     | Amino acid metabolism Nitrogen and sulphur metabolism SUBCELLULAR LOCALISATION                          |
| CA2662 | 0.8 | 1.0 | 1.2 | 1.0 | IPF17139   | 9553708..9unknown function                       | orf19.3553  | 17139 | IPF17139   | UNCLASSIRNA binding                                                                                     |
| CA2663 | 1.2 | 1.1 | 1.1 | 1.0 | NUP133     | 9555106..9nuclear pore protein (b                | orf19.3552  | 13373 | CaNUP133   | TRANSCR structural molecule activity                                                                    |
| CA2664 | 0.9 | 1.0 | 1.0 | 1.0 | IPF13370   | complemer unknown function                       | orf19.3551  | 13370 | IPF13370   | UNCLASSIstructural molecule activity                                                                    |
| CA2665 | 4.3 | 0.9 | 3.9 | 0.9 | CDC21      | complemer thymidylate synthase (                 | orf19.3549  | 13364 | CaCDC21    | Nucleotide transferase activity                                                                         |
| CA2666 | 0.7 | 0.9 | 0.8 | 1.0 | IPF16995   | complemer unknown function                       | orf19.3548  | 16995 | IPF16995   | UNCLASSImolecular_function unknown                                                                      |
| CA2667 | 1.7 | 1.2 | 1.1 | 0.8 | IPF16996   | 9563566..9unknown function                       | orf19.3547  | 16996 | IPF16996   | UNCLASSImolecular_function unknown                                                                      |
| CA2668 | 1.2 | 0.9 | 0.7 | 1.0 | IPF17553   | complemer similar to Saccharomyr                 | orf19.3546  | 17553 | IPF17553   | CELLULAFprotein binding                                                                                 |
| CA2669 | 1.0 | 0.7 | 1.0 | 0.9 | IPF17494.ε | complemer unknown function, 3-prime end          |             | 17494 | IPF17494.ε | No significant S.c. match                                                                               |
| CA2670 | 0.7 | 1.1 | 0.9 | 1.0 | MAK16      | 9569686..9nuclear viral propagati                | orf19.5500  | 5859  | CaMAK16    | CELL CYC molecular_function unknown                                                                     |
| CA2671 | 1.0 | 1.0 | 1.0 | 1.1 | IPF5856    | 9571354..94-hydroxyphenylpyruv                   | orf19.5499  | 5856  | IPF5856    | No significant S.c. match                                                                               |
| CA2672 | 1.0 | 1.1 | 0.6 | 0.9 | EFH1       | complemer Transcription regulator                | orf19.5498  | 5855  | CaEFH1     | TRANSCRIPTION CELLULAR COMMUNICATION/SIGNAL TRANSDUCTION MECHANISM CELL FATE SUBCELLULAR LOC            |
| CA2673 | 1.1 | 1.0 | 1.2 | 1.1 | IPF5849    | 9580118..9unknown function                       | orf19.5496  | 5849  | IPF5849    | TRANSPORT FACILITATION                                                                                  |
| CA2674 | 1.1 | 0.9 | 1.2 | 1.2 | IPF5846    | complemer unknown function                       | orf19.5495  | 5846  | IPF5846    | UNCLASSIFIED PROTEINS                                                                                   |
| CA2675 | 0.4 | 0.8 | 0.9 | 1.3 | GSP1       | 9589303..9GTP-binding protein (b                 | orf19.5493  | 5839  | CaGSP1     | TRANSCR hydrolase activity                                                                              |
| CA2676 | 0.8 | 1.2 | 1.0 | 1.2 | YHC1       | complemer SMALL NUCLEAR RIE                      | orf19.5492  | 5838  | CaYHC1     | TRANSCR RNA binding                                                                                     |
| CA2677 | 0.6 | 0.8 | 1.0 | 1.1 | ATP14.EXO  | 9591635..9F1FO-ATPase complex, subunit h, e      |             | 5835  | CaATP14.ε  | ENERGY C transporter activity                                                                           |
| CA2678 | 0.9 | 1.0 | 1.1 | 1.1 | IPF5834    | 9592274..9unknown function                       | orf19.12946 | 5834  | IPF5834    | CELL CYCLE AND DNA PROCESSING CONTROL OF CELLULAR ORGANIZATION SUBCELLULAR LOCALISATION                 |
| CA2679 | 0.9 | 1.4 | 1.1 | 1.0 | IFU5       | 9594892..9Unknown function                       | orf19.2568  | 19956 | CaIFU5     | UNCLASSImolecular_function unknown                                                                      |
| CA2680 | 0.7 | 1.0 | 1.1 | 1.0 | MCI4       | 9595886..9NADH dehydrogenase                     | orf19.2570  | 2728  | CaMCI4     | No significant S.c. match                                                                               |
| CA2681 | 1.0 | 0.8 | 1.2 | 1.0 | SEC4       | complemer GTP-binding protein                    | orf19.2571  | 2730  | CaSEC4     | CELLULAFhydrolase activity                                                                              |
| CA2682 | 1.0 | 1.0 | 1.1 | 1.1 | FRS1       | complemer Phenylalanyl-tRNA syr                  | orf19.2573  | 2731  | CaFRS1     | PROTEIN I ligase activity                                                                               |
| CA2683 | 1.0 | 1.3 | 1.0 | 1.0 | IFU4       | complemer Unknown function                       | orf19.2574  | 2734  | CaIFU4     | UNCLASSImolecular_function unknown                                                                      |
| CA2684 | 0.7 | 1.3 | 1.2 | 1.0 | IFU3       | 9603952..9Unknown function                       | orf19.2575  | 2736  | CaIFU3     | CLASSIFICmolecular_function unknown                                                                     |
| CA2685 | 1.2 | 1.1 | 1.2 | 1.1 | MSH4       | complemer DNA mismatch repair (                  | orf19.2579  | 2741  | CaMSH4     | CELL CYC DNA binding                                                                                    |
| CA2686 | 1.3 | 1.0 | 1.0 | 1.2 | HST2       | complemer Transcription regulator                | orf19.2580  | 2743  | CaHST2     | TRANSCR hydrolase activity                                                                              |
| CA2687 | 1.0 | 1.0 | 1.1 | 0.8 | IFU6.3F    | complemer Unknown function, 3-p                  | orf19.10113 | 18435 | CaIFU6.3f  | No significant S.c. match                                                                               |
| CA2688 | 1.3 | 1.1 | 0.9 | 0.9 | IFU6.5F    | complemer Putative ortholog of S.                | orf19.2581  | 2744  | CaIFU6.5f  | Metabolism of vitamins cofactors and prosthetic groups                                                  |
| CA2689 | 0.9 | 1.2 | 1.0 | 1.1 | IFU2       | 9610078..9Unknown function                       | orf19.2582  | 2746  | CaIFU2     | UNCLASSImolecular_function unknown                                                                      |
| CA2690 | 1.3 | 0.9 | 0.9 | 0.9 | PTR2.EXO   | complemer Peptide transporter for di- and tripep |             | 2747  | CaPTR2.ε   | No significant S.c. match                                                                               |
| CA2691 | 1.0 | 0.9 | 1.0 | 1.1 | PTR2.EXO   | complemer Peptide transporter for                | orf19.2583  | 2749  | CaPTR2.ε   | CELLULAR TRANSPORT AND TRANSPORT MECHANISMS SUBCELLULAR LOCALISATION TRANSPORT FACILITATION             |
| CA2692 | 0.8 | 1.0 | 1.1 | 0.9 | IPF9173.3f | complemer similar to Saccharomyr                 | orf19.10246 | 10250 | IPF9173.3f | PROTEIN FATE [folding modification destination] ""CELLULAR TRANSPORT AND TRANSPORT MECHANISMS           |
| CA2693 | 0.8 | 1.2 | 0.9 | 1.1 | IPF9173.5f | complemer similar to Saccharomyr                 | orf19.10247 | 9173  | IPF9173.5f | PROTEIN Imolecular_function unknown                                                                     |
| CA2694 | 0.9 | 1.0 | 1.0 | 1.0 | IPF9171    | complemer unknown function                       | orf19.10248 | 9171  | IPF9171    | CLASSIFICATION NOT YET CLEAR-CUT                                                                        |
| CA2695 | 1.0 | 1.4 | 1.0 | 1.1 | IPF9070    | 9624821..9similar to Saccharomyr                 | orf19.2735  | 9170  | IPF9070    | TRANSCR RNA binding                                                                                     |
| CA2696 | 0.9 | 1.1 | 1.2 | 1.2 | IPF9169    | 9626418..9similar to Saccharomyr                 | orf19.2736  | 9169  | IPF9169    | TRANSCR transcription regulator activity                                                                |
| CA2697 | 2.5 | 2.7 | 2.0 | 1.2 | IPF9167    | 9627997..9unknown function                       | orf19.2737  | 9167  | IPF9167    | UNCLASSIFIED PROTEINS                                                                                   |
| CA2698 | 1.2 | 1.0 | 1.0 | 1.0 | SUL1       | 9632399..9High-affinity sulfate tra              | orf19.10252 | 14417 | CaSUL1     | Amino acid transporter activity                                                                         |
| CA2699 | 0.6 | 1.0 | 1.0 | 1.0 | RLF2       | 9635300..9chromatin assembly cc                  | orf19.10253 | 19958 | CaRLF2     | CELL CYC molecular_function unknown                                                                     |
| CA2700 | 1.0 | 1.0 | 1.1 | 1.0 | IPF14414.ε | 9637300..9unknown function, exo                  | orf19.10254 | 17364 | IPF14414.ε | No significant S.c. match                                                                               |
| CA2701 | 0.8 | 0.9 | 1.1 | 1.0 | IPF14414.ε | 9638870..9unknown function, exo                  | orf19.10255 | 15360 | IPF14414.ε | TRANSCRIPTION SUBCELLULAR LOCALISATION                                                                  |
| CA2702 | 0.7 | 1.1 | 0.9 | 1.1 | EMP70      | 9644624..9Endosomal protein (by                  | orf19.10260 | 14444 | CaEMP70    | CELLULAF transporter activity                                                                           |
| CA2703 | 0.8 | 0.6 | 0.8 | 1.0 | IPF12193   | 9653983..9unknown function                       | orf19.4655  | 12193 | IPF12193   | TRANSPORT FACILITATION                                                                                  |
| CA2704 | 0.8 | 1.0 | 1.0 | 1.1 | IPF12195   | complemer unknown function                       | orf19.4656  | 12195 | IPF12195   | No significant S.c. match                                                                               |
| CA2705 | 0.8 | 1.1 | 1.1 | 1.0 | NEM1       | complemer required for nuclear mc                | orf19.4657  | 12196 | CaNEM1     | CELL CYC molecular_function unknown                                                                     |
| CA2706 | 1.2 | 1.1 | 1.1 | 1.1 | IPF11006   | complemer unknown function                       | orf19.4658  | 11006 | IPF11006   | UNCLASSIFIED PROTEINS                                                                                   |
| CA2707 | 0.9 | 1.2 | 1.0 | 0.8 | IPF11003   | 9666525..9by homology pre-mrna                   | orf19.4659  | 11003 | IPF11003   | TRANSCR RNA binding                                                                                     |
| CA2708 | 0.4 | 1.1 | 0.8 | 1.2 | RPS6A      | complemer ribosomal protein S6 (I                | orf19.4660  | 11001 | CaRPS6A    | PROTEIN I structural molecule activity                                                                  |
| CA2709 | 0.9 | 0.9 | 1.1 | 0.8 | IPF4828    | complemer by homology to S. cere                 | orf19.4662  | 4828  | IPF4828    | TRANSCR DNA binding                                                                                     |
| CA2710 | 0.5 | 0.8 | 1.0 | 1.1 | IPF7403    | complemer unknown function                       | orf19.4664  | 7403  | IPF7403    | UNCLASSImolecular_function unknown                                                                      |
| CA2711 | 0.9 | 0.8 | 0.9 | 0.9 | TFB3       | complemer Transcription/repair fac               | orf19.8198  | 18427 | CaTFB3     | CELL CYC transcription regulator activity                                                               |
| CA2712 | 0.5 | 1.0 | 0.9 | 1.3 | SPE2       | complemer by homology to S. cere                 | orf19.8199  | 11572 | CaSPE2     | Secondary lyase activity                                                                                |
| CA2713 | 1.0 | 1.0 | 0.9 | 0.9 | IFF8       | 9680874..9unknown function                       | orf19.570   | 11578 | CaIFF8     | No significant S.c. match                                                                               |
| CA2714 | 1.0 | 1.0 | 1.5 | 1.0 | IFF2       | 9687390..9unknown function                       | orf19.575   | 7360  | CaIFF2     | UNCLASSIFIED PROTEINS                                                                                   |
| CA2715 | 1.3 | 0.9 | 1.0 | 0.8 | CTF8       | 9691912..9(putative) kinetochore p               | orf19.576   | 7354  | CaCTF8     | UNCLASSImolecular_function unknown                                                                      |
| CA2716 | 1.3 | 0.9 | 1.0 | 0.9 | IPF7353    | complemer unknown function                       | orf19.577   | 7353  | IPF7353    | UNCLASSImolecular_function unknown                                                                      |
| CA2717 | 1.3 | 1.1 | 0.9 | 0.9 | MSB3       | 9696404..9GTPase-activating pro                  | orf19.8209  | 7351  | CaMSB3     | UNCLASSIenzyme regulator activity                                                                       |

|        |     |     |     |     |          |                                      |                |       |           |                                                                               |
|--------|-----|-----|-----|-----|----------|--------------------------------------|----------------|-------|-----------|-------------------------------------------------------------------------------|
| CA2718 | 1.6 | 1.0 | 1.0 | 0.9 | IPF7374  | 9704761..9 unknown function          | orf19.10847    | 7374  | IPF7374   | No significant S.c. match                                                     |
| CA2719 | 1.5 | 1.1 | 1.1 | 0.9 | SOD2     | complemer Manganese-superoxid        | orf19.3340     | 7368  | CaSOD2    | CELL RES oxidoreductase activity                                              |
| CA2720 | 0.9 | 1.4 | 1.1 | 1.2 | IPF7366  | complemer Arginyl-tRNA synthet       | orf19.3341     | 7366  | IPF7366   | PROTEIN :ligase activity                                                      |
| CA2721 | 0.6 | 1.2 | 1.0 | 1.0 | IPF4799  | 9714328..9 unknown Function          | orf19.3342     | 4799  | IPF4799   | UNCLASSI molecular_function unknown                                           |
| CA2722 | 1.0 | 1.2 | 1.1 | 1.2 | IPF4801  | 9716406..9 similar to Saccharomy     | orf19.3344     | 4801  | IPF4801   | PROTEIN I molecular_function unknown                                          |
| CA2723 | 1.0 | 1.6 | 0.8 | 1.0 | IPF4805  | 9718368..9 unknown Function          | orf19.3345     | 4805  | IPF4805   | PROTEIN I ligase activity                                                     |
| CA2724 | 1.4 | 1.0 | 1.0 | 0.9 | RPB7     | complemer DNA-directed RNA pol       | orf19.10855    | 4809  | CaRPB7    | TRANSCR nucleotidyltransferase activity                                       |
| CA2725 | 0.6 | 1.1 | 1.1 | 0.9 | MRPL23A  | 9724136..9 mitochondrial ribosom     | orf19.10856    | 4810  | CaMRPL23  | PROTEIN : structural molecule activity                                        |
| CA2727 | 1.3 | 1.5 | 1.1 | 1.1 | IPF10318 | complemer similar to Saccharomy      | orf19.2119     | 10318 | IPF10318  | CELL CYC DNA binding,transcription regulator activity                         |
| CA2728 | 1.7 | 0.5 | 1.5 | 0.9 | IPF10322 | 9728491..9 putative mitochondrial    | orf19.9665     | 10322 | IPF10322  | Nucleotide transporter activity                                               |
| CA2729 | 0.5 | 1.0 | 1.0 | 1.3 | NAT2     | complemer N-acetyltransferase fo     | orf19.9664     | 10323 | CaNAT2    | PROTEIN : transferase activity                                                |
| CA2730 | 1.4 | 1.0 | 0.9 | 1.1 | IPF10325 | complemer molybdopterin-converti     | orf19.9663     | 10325 | IPF10325  | Metabolism molecular_function unknown                                         |
| CA2731 | 1.0 | 1.4 | 1.1 | 1.3 | URIC     | complemer uricase (urate oxidase)    | orf19.2114     | 10326 | CaURIC    | No significant S.c. match                                                     |
| CA2732 | 1.8 | 1.1 | 1.3 | 0.9 | IPF10327 | complemer unknown function           | orf19.2113     | 10327 | IPF10327  | UNCLASSI molecular_function unknown                                           |
| CA2733 | 0.8 | 1.2 | 1.1 | 1.1 | PRP18    | 9734529..9 U5 snRNA-associated       | orf19.2112     | 10329 | CaPRP18   | TRANSCR protein binding                                                       |
| CA2734 | 0.5 | 0.6 | 0.9 | 0.9 | RPL38    | 9735515..9 ribosomal protein L38     | (by homology)  | 10330 | CaRPL38   | PROTEIN : structural molecule activity                                        |
| CA2735 | 0.7 | 1.2 | 1.0 | 1.0 | TFG2     | complemer transcription initiation f | orf19.2111     | 19765 | CaTFG2    | TRANSCR transcription regulator activity                                      |
| CA2736 | 0.8 | 1.2 | 1.0 | 1.0 | ATE1     | 9737124..9 arginyl tRNA transfer     | orf19.2110     | 15421 | CaATE1    | Amino acid transferase activity                                               |
| CA2737 | 0.9 | 1.1 | 0.9 | 1.1 | IPF15423 | complemer putative superoxide dis    | orf19.2108     | 15423 | IPF15423  | No significant S.c. match                                                     |
| CA2738 | 0.8 | 1.0 | 1.2 | 1.1 | STF2     | 9740300..9 ATP synthase regulatory   | factor (by t   | 15425 | CaSTF2    | PROTEIN I molecular_function unknown                                          |
| CA2739 | 0.5 | 0.9 | 0.7 | 0.9 | MUQ1     | complemer choline phosphate cyti     | orf19.2107     | 10634 | CaMUQ1    | Lipid fatty-ε nucleotidyltransferase activity                                 |
| CA2740 | 0.9 | 1.0 | 0.9 | 1.0 | IPF10633 | complemer unknown function           | orf19.2106     | 10633 | IPF10633  | UNCLASSI molecular_function unknown                                           |
| CA2741 | 0.9 | 1.0 | 0.9 | 0.9 | IPF10632 | complemer unknown function           | orf19.2105     | 10632 | IPF10632  | UNCLASSI molecular_function unknown                                           |
| CA2742 | 0.9 | 0.9 | 1.0 | 1.0 | JAC1     | 9743500..9 molecular chaperone (     | orf19.2104     | 10631 | CaJAC1    | ENERGY * chaperone activity                                                   |
| CA2743 | 1.0 | 0.9 | 1.2 | 1.0 | CKB21    | complemer Casein kinase II, beta     | orf19.2102     | 10630 | CaCKB21   | TRANSCR protein kinase activity                                               |
| CA2744 | 0.8 | 1.1 | 1.0 | 0.9 | IPF10626 | 9745477..9 unknown function          | orf19.2101     | 10626 | IPF10626  | UNCLASSI molecular_function unknown                                           |
| CA2745 | 1.1 | 1.0 | 1.1 | 0.9 | HIR1     | complemer Histone transcription r    | orf19.9647     | 10625 | CaHIR1    | TRANSCR transcription regulator activity                                      |
| CA2746 | 0.8 | 0.6 | 0.5 | 1.5 | IPF19766 | 9749207..9 unknown function          | orf19.9646     | 19766 | IPF19766  | Lipid fatty-acid and isoprenoid metabolism ""CONTROL OF CELLULAR ORGANIZATION |
| CA2747 | 1.1 | 0.9 | 1.1 | 1.1 | IPF11467 | complemer unknown function           | orf19.2367     | 11467 | IPF11467  | UNCLASSI molecular_function unknown                                           |
| CA2748 | 0.8 | 1.1 | 0.9 | 0.9 | IPF11466 | 9756151..9 unknown function          | orf19.2368     | 11466 | IPF11466  | CELLULAF protein binding                                                      |
| CA2749 | 0.6 | 1.1 | 1.2 | 0.9 | IPF11465 | complemer unknown function           | orf19.2369     | 11465 | IPF11465  | CELL CYC DNA binding                                                          |
| CA2750 | 0.7 | 1.0 | 0.8 | 0.8 | ATX1     | 9759522..9 antioxidant protein and   | metal homec    | 11464 | CaATX1    | CELL RES chaperone activity                                                   |
| CA2751 | 0.9 | 0.9 | 1.0 | 0.9 | IPF19558 | complemer unknown function           | orf19.2370     | 19558 | IPF19558  | UNCLASSI molecular_function unknown                                           |
| CA2752 | 1.8 | 0.9 | 1.0 | 0.8 | IPF6238  | 9768682..9 GAG protein of retro      | orf19.2374     | 6238  | IPF6238   | No significant S.c. match                                                     |
| CA2753 | 0.5 | 1.2 | 1.0 | 1.1 | IPF16806 | 9772787..9 unknown function          | orf19.13062    | 16806 | IPF16806  | UNCLASSI protein binding                                                      |
| CA2754 | 0.6 | 0.8 | 1.1 | 1.1 | VPS45    | complemer vacuolar protein sortin    | orf19.13063    | 12432 | CaVPS45   | PROTEIN I chaperone activity                                                  |
| CA2755 | 1.0 | 0.8 | 1.1 | 1.2 | IFA12    | 9777121..9 unknown function          | orf19.13064    | 12435 | CaIFA12   | No significant S.c. match                                                     |
| CA2756 | 0.4 | 0.7 | 0.9 | 0.9 | IPF18418 | 9779713..9 unknown function          | orf19.13065    | 18418 | IPF18418  | UNCLASSI molecular_function unknown                                           |
| CA2757 | 1.2 | 1.0 | 0.9 | 1.0 | IPF19767 | complemer unknown function           | orf19.13066    | 19767 | IPF19767  | UNCLASSI molecular_function unknown                                           |
| CA2758 | 0.7 | 1.0 | 1.3 | 1.0 | GLC3     | complemer 1,4-galactan branching     | e orf19.13067  | 16449 | CaGLC3    | C-compour transferase activity                                                |
| CA2759 | 1.6 | 1.2 | 1.1 | 1.1 | ARP4     | complemer actin-related protein      | (b orf19.13069 | 13789 | CaARP4    | CONTROL DNA binding                                                           |
| CA2760 | 1.2 | 1.1 | 1.3 | 1.0 | IPF13790 | complemer Unknown function           | orf19.13070    | 13790 | IPF13790  | No significant S.c. match                                                     |
| CA2761 | 2.2 | 3.4 | 2.3 | 1.1 | IPF15013 | 9793468..9 pyruvate decarboxylas     | orf19.13071    | 15013 | IPF15013  | No significant S.c. match                                                     |
| CA2762 | 0.9 | 1.1 | 1.1 | 1.0 | IPF15012 | 9795542..9 pre mRNA splicing fac     | orf19.13072    | 15012 | IPF15012  | UNCLASSI RNA binding                                                          |
| CA2763 | 0.6 | 0.9 | 1.1 | 1.1 | DIC1.3   | 9797980..9 dicarboxylate carrier     | pr orf19.5628  | 16773 | CaDIC1.3  | Phosphate transporter activity                                                |
| CA2764 | 1.1 | 1.6 | 1.1 | 1.1 | QCR7     | complemer ubiquinol-cytochrome-      | orf19.5629     | 16775 | CaQCR7    | ENERGY * transporter activity,oxidoreductase activity                         |
| CA2765 | 1.0 | 0.8 | 1.0 | 1.1 | APA2     | complemer ATP adenyllyltransfer      | orf19.13075    | 18417 | CaAPA2    | Nucleotide hydrolase activity                                                 |
| CA2766 | 0.6 | 1.0 | 1.1 | 1.1 | IPF18416 | 9801246..9 unknown function          | orf19.13076    | 18416 | IPF18416  | No significant S.c. match                                                     |
| CA2767 | 0.9 | 1.1 | 1.0 | 1.0 | TOA1     | complemer transcription initiation   | f orf19.2682   | 14884 | CaTOA1    | TRANSCR transcription regulator activity                                      |
| CA2768 | 1.3 | 0.9 | 0.8 | 0.8 | IPF17011 | complemer similar to Saccharomy      | orf19.2684     | 17011 | IPF17011  | CELL CYC molecular_function unknown                                           |
| CA2769 | 0.2 | 0.1 | 0.1 | 0.4 | IPF15870 | complemer unknown function           | orf19.2685     | 15870 | IPF15870  | No significant S.c. match                                                     |
| CA2770 | 1.0 | 0.2 | 1.3 | 1.2 | CPS1     | 9815697..9 Carboxypeptidase YS       | orf19.2686     | 7980  | CaCPS1    | Nitrogen ar peptidase activity                                                |
| CA2771 | 0.8 | 1.0 | 1.2 | 1.1 | RPB10    | complemer DNA-directed RNA poly      | merase II (b   | 7977  | CaRPB10   | TRANSCR nucleotidyltransferase activity                                       |
| CA2772 | 2.4 | 1.1 | 1.1 | 1.1 | IPF20112 | 9818217..9 unknown function          | orf19.2688     | 20112 | IPF20112  | CELL CYC RNA binding                                                          |
| CA2773 | 1.2 | 1.1 | 1.1 | 1.3 | MGM1     | complemer GTPase                     | orf19.2690     | 7974  | CaMGM1    | SUBCELLL hydrolase activity                                                   |
| CA2774 | 1.4 | 1.1 | 1.0 | 1.0 | TFC4     | 9827896..9 transcription factor      | IIIC orf19.274 | 10122 | CaTFC4    | TRANSCR transcription regulator activity                                      |
| CA2775 | 1.0 | 1.1 | 1.1 | 1.0 | POP5     | 9831324..9 subunit of RNase P-       | lik orf19.275  | 10123 | CaPOP5    | CELL CYC RNA binding                                                          |
| CA2776 | 0.8 | 1.0 | 1.1 | 1.1 | IPF10124 | complemer Alcohol acetyltransfer     | orf19.276      | 10124 | IPF10124  | UNCLASSI molecular_function unknown                                           |
| CA2777 | 0.6 | 1.0 | 0.9 | 1.0 | THI6     | 9833961..9 thiamin-phosphate pyr     | orf19.277      | 10126 | CaTHI6    | Metabolism transferase activity                                               |
| CA2778 | 1.0 | 1.1 | 1.1 | 1.1 | MTR      | complemer neutral amino acid pen     | orf19.278      | 10127 | CaMTR     | UNCLASSIFIED PROTEINS                                                         |
| CA2779 | 0.8 | 1.1 | 1.1 | 0.9 | IPF3836  | 9837627..9 unknown function          | orf19.279      | 19768 | IPF3836   | UNCLASSI hydrolase activity                                                   |
| CA2780 | 0.8 | 1.1 | 0.9 | 1.0 | IPF3831  | 9838807..9 unknown function          | orf19.281      | 3798  | IPF3831   | No significant S.c. match                                                     |
| CA2781 | 0.9 | 1.0 | 1.2 | 1.1 | IPF3821  | 9840046..9 unknown function          | orf19.284      | 3805  | IPF3821   | No significant S.c. match                                                     |
| CA2782 | 1.7 | 2.1 | 2.2 | 0.9 | IPF3806  | 9840952..9 unknown function          | orf19.285      | 3806  | IPF3806   | UNCLASSI molecular_function unknown                                           |
| CA2783 | 1.1 | 0.8 | 1.2 | 1.1 | IPF3808  | 9841819..9 unknown function          | orf19.286      | 3808  | IPF3808   | PROTEIN FATE [folding modification destination]                               |
| CA2784 | 1.0 | 0.9 | 1.1 | 1.1 | IPF3810  | complemer unknown function           | orf19.287      | 3810  | IPF3810   | No significant S.c. match                                                     |
| CA2785 | 1.0 | 1.0 | 1.0 | 1.0 | MET13    | complemer Methylene tetrahydrof      | orf19.288      | 3814  | CaMET13   | Amino acid structural molecule activity                                       |
| CA2786 | 1.3 | 1.0 | 1.1 | 0.9 | KRE5.3EO | complemer UDP-glucose:glycopro       | orf19.290      | 3818  | CaKRE5.3ε | C-compour transferase activity                                                |
| CA2787 | 1.9 | 1.8 | 1.6 | 1.1 | EFG1     | 9858262..9 Enhanced filamentous      | orf19.8243     | 3577  | CaEFG1    | TRANSCR DNA binding,transcription regulator activity                          |
| CA2788 | 1.2 | 0.9 | 1.0 | 1.0 | RAD26    | complemer DNA repair and recom       | orf19.8240     | 3569  | CaRAD26   | CELL CYC hydrolase activity                                                   |
| CA2789 | 1.5 | 1.8 | 1.2 | 1.1 | IPF3567  | 9865948..9 unknown function          | orf19.606      | 3567  | IPF3567   | UNCLASSI molecular_function unknown                                           |

|        |     |     |     |         |                            |                                               |             |         |                                                        |                                                                                                            |
|--------|-----|-----|-----|---------|----------------------------|-----------------------------------------------|-------------|---------|--------------------------------------------------------|------------------------------------------------------------------------------------------------------------|
| CA2790 | 1.0 | 1.0 | 1.1 | IPF3562 | 9869139..9Unknown function | orf19.604                                     | 3562        | IPF3562 | Metabolism of vitamins cofactors and prosthetic groups |                                                                                                            |
| CA2791 | 0.9 | 0.8 | 1.2 | 1.0     | IMP4                       | 9871684..9Ribonucleoprotein (by               | orf19.603   | 3560    | CaIMP4                                                 | TRANSCR RNA binding                                                                                        |
| CA2792 | 0.8 | 0.8 | 0.9 | 1.0     | TRK1.3F                    | complemer Potassium transporter,              | orf19.602   | 3559    | CaTRK1.3f                                              | CELLULAR TRANSPORT AND TRANSPORT MECHANISMS SUBCELLULAR LOCALISATION TRANSPORT FACILITATION                |
| CA2793 | 1.3 | 0.9 | 1.1 | 1.1     | TRK1.5F                    | complemer Potassium transporter,              | orf19.8233  | 3557    | CaTRK1.5f                                              | CELLULAR transporter activity                                                                              |
| CA2794 | 1.0 | 1.0 | 1.0 | 1.0     | IPF8408                    | 9887619..9unknown function                    | orf19.1724  | 8408    | IPF8408                                                | No significant S.c. match                                                                                  |
| CA2795 | 1.1 | 1.0 | 0.9 | 1.0     | IPF8407                    | 9888306..9unknown function                    | orf19.1723  | 8407    | IPF8407                                                | UNCLASSI molecular_function unknown                                                                        |
| CA2796 | 2.7 | 1.3 | 1.5 | 0.9     | IPF8405                    | complemer similar to Saccharomy               | orf19.1721  | 8405    | IPF8405                                                | CELLULAR molecular_function unknown                                                                        |
| CA2797 | 0.5 | 0.8 | 1.0 | 1.0     | IPF8404                    | 9891254..9putative helicase (by h             | orf19.1720  | 8404    | IPF8404                                                | CELL CYC helicase activity                                                                                 |
| CA2798 | 0.9 | 1.2 | 1.2 | 0.9     | IPF8402                    | complemer similar to Saccharomy               | orf19.1719  | 8402    | IPF8402                                                | C-compour hydrolase activity                                                                               |
| CA2799 | 0.8 | 0.8 | 0.9 | 1.1     | IPF19769                   | 9899194..9unknown function                    | orf19.1718  | 19769   | IPF19769                                               | No significant S.c. match                                                                                  |
| CA2800 | 0.5 | 0.9 | 0.9 | 1.1     | IPF11366                   | 9902499..9unknown function                    | orf19.1717  | 11366   | IPF11366                                               | No significant S.c. match                                                                                  |
| CA2801 | 1.5 | 1.0 | 0.9 | 0.8     | URA3                       | complemer orotidine-5 -monophos               | orf19.1716  | 11364   | CaURA3                                                 | Nucleotide lyase activity                                                                                  |
| CA2802 | 0.5 | 1.2 | 0.9 | 1.0     | IPF11363                   | complemer unknown function                    | orf19.9283  | 11363   | IPF11363                                               | No significant S.c. match                                                                                  |
| CA2803 | 1.3 | 1.4 | 1.5 | 1.5     | IPF11711                   | 9909449..9ubiquitin-protein ligase            | orf19.5776  | 11711   | IPF11711                                               | CELL CYC ligase activity                                                                                   |
| CA2804 | 1.5 | 1.0 | 1.0 | 1.0     | IPF19961                   | complemer unknown function                    | orf19.5777  | 19961   | IPF19961                                               | UNCLASSI molecular_function unknown                                                                        |
| CA2805 | 0.9 | 0.4 | 0.8 | 1.0     | RNR1                       | 9914611..9ribonucleoside-diphos               | orf19.5779  | 11704   | CaRNR1                                                 | Nucleotide oxidoreductase activity                                                                         |
| CA2806 | 1.0 | 1.0 | 1.1 | 0.9     | IPF11702                   | 9918043..9unknown function                    | orf19.5780  | 11702   | IPF11702                                               | UNCLASSI molecular_function unknown                                                                        |
| CA2807 | 2.2 | 1.5 | 1.7 | 1.1     | IPF11965                   | 9920339..9unknown function                    | orf19.5782  | 11965   | IPF11965                                               | UNCLASSI hydrolase activity                                                                                |
| CA2808 | 0.8 | 1.0 | 0.9 | 0.9     | IPF11966                   | complemer unknown function                    | orf19.5783  | 11966   | IPF11966                                               | UNCLASSI molecular_function unknown                                                                        |
| CA2809 | 0.9 | 0.6 | 1.0 | 1.0     | AMO1                       | complemer amine oxidase (by hon               | orf19.5784  | 11969   | CaAMO1                                                 | No significant S.c. match                                                                                  |
| CA2810 | 0.8 | 1.1 | 0.8 | 0.6     | EFT2                       | complemer translation elongation f            | orf19.5788  | 6840    | CaEFT2                                                 | PROTEIN †translation regulator activity                                                                    |
| CA2811 | 0.4 | 1.4 | 0.8 | 1.5     | RPS10                      | complemer Ribosomal protein 10                | orf19.10520 | 5347    | CaRPS10                                                | PROTEIN †structural molecule activity                                                                      |
| CA2812 | 0.9 | 1.0 | 1.3 | 0.9     | TEM1                       | 9937411..9 GTP-binding protein of             | orf19.10519 | 5346    | CaTEM1                                                 | CELL CYC protein binding                                                                                   |
| CA2813 | 0.7 | 1.2 | 1.2 | 1.1     | ORC1                       | 9938442..9Origin recognition com              | orf19.10518 | 5612    | CaORC1                                                 | CELL CYC DNA binding                                                                                       |
| CA2814 | 0.4 | 1.1 | 0.9 | 0.9     | IPF5607                    | 9941036..9unknown function                    | orf19.2998  | 5607    | IPF5607                                                | UNCLASSI molecular_function unknown                                                                        |
| CA2815 | 0.8 | 1.0 | 1.2 | 1.1     | IPF5604                    | complemer unknown function                    | orf19.2996  | 5604    | IPF5604                                                | CONTROL molecular_function unknown                                                                         |
| CA2816 | 0.7 | 1.0 | 1.0 | 1.0     | IPF5601                    | complemer unknown function                    | orf19.2995  | 5601    | IPF5601                                                | UNCLASSI molecular_function unknown                                                                        |
| CA2817 | 0.3 | 0.5 | 0.7 | 0.7     | RPS16.3                    | complemer ribosomal protein, 3-prime end      |             | 5598    | CaRPS16.3                                              | PROTEIN †structural molecule activity                                                                      |
| CA2818 | 0.7 | 0.5 | 0.8 | 0.8     | RPL13                      | 9948383..9Ribosomal protein                   | orf19.2994  | 5596    | CaRPL13                                                | PROTEIN †structural molecule activity                                                                      |
| CA2819 | 0.3 | 0.7 | 0.7 | 1.1     | RPA1                       | complemer 60S ribosomal protein               | orf19.2992  | 5594    | CaRPA1                                                 | PROTEIN †structural molecule activity                                                                      |
| CA2820 | 0.7 | 1.0 | 1.0 | 1.0     | HOL1                       | complemer member of major facilit             | orf19.2991  | 5592    | CaHOL1                                                 | CELL RESCUE DEFENSE AND VIRULENCE ""TRANSPORT FACILITATION                                                 |
| CA2821 | 3.5 | 1.6 | 1.3 | 1.3     | CDR3.3E                    | 9955198..9Opaque-specific ABC transporter, 3- |             | 17152   | CaCDR3.3                                               | SUBCELLULAR LOCALISATION TRANSPORT FACILITATION                                                            |
| CA2822 | 1.3 | 1.1 | 1.2 | 0.9     | IPF14550                   | 9957534..9unknown function                    | orf19.1314  | 17153   | IPF14550                                               | UNCLASSIFIED PROTEINS                                                                                      |
| CA2823 | 0.8 | 1.0 | 1.1 | 1.1     | IPF14554                   | 9960135..9similar to Saccharomy               | orf19.1317  | 14554   | IPF14554                                               | Lipid fatty-acid and isoprenoid metabolism                                                                 |
| CA2824 | 1.1 | 0.9 | 1.0 | 0.8     | IPF17888                   | complemer unknown function                    | orf19.1318  | 17888   | IPF17888                                               | UNCLASSI molecular_function unknown                                                                        |
| CA2825 | 0.4 | 1.0 | 0.0 | 1.0     | HWP1                       | complemer Hyphal wall protein                 | orf19.1321  | 12916   | CaHWP1                                                 | C-compound and carbohydrate metabolism SUBCELLULAR LOCALISATION Hypha-specific                             |
| CA2826 | 0.8 | 0.9 | 1.3 | 0.9     | APL6                       | complemer AP-3 complex subunit,               | orf19.1323  | 12906   | CaAPL6                                                 | CELLULAR molecular_function unknown                                                                        |
| CA2827 | 1.1 | 1.0 | 0.6 | 1.2     | RAD2                       | complemer structure-specific nucle            | orf19.1324  | 19770   | CaRAD2                                                 | CELL CYC DNA binding                                                                                       |
| CA2828 | 1.1 | 0.6 | 1.1 | 1.1     | IPF17026                   | 9974890..9unknown function                    | orf19.1325  | 17026   | IPF17026                                               | Amino acid metabolism CELL CYCLE AND DNA PROCESSING CONTROL OF CELLULAR ORGANIZATION                       |
| CA2829 | 0.5 | 0.9 | 0.8 | 1.1     | IFA7                       | complemer unknown function                    | orf19.1326  | 14593   | CaIFA7                                                 | Nucleotide metabolism CELL CYCLE AND DNA PROCESSING CELLULAR COMMUNICATION/SIGNAL TRANSDUCTION M           |
| CA2830 | 0.3 | 0.6 | 1.0 | 1.3     | RBT1                       | 9982188..9repressed by TUP1 pr                | orf19.1327  | 15385   | CaRBT1                                                 | Hypha-specific No significant S.c. match                                                                   |
| CA2831 | 0.4 | 1.0 | 1.0 | 1.0     | IPF15706                   | complemer unknown function                    | orf19.4783  | 15706   | IPF15706                                               | No significant S.c. match                                                                                  |
| CA2832 | 1.6 | 1.4 | 2.2 | 0.9     | CRD1                       | 9988871..9 Cu-transporting P1-tyr             | orf19.4784  | 19962   | CaCRD1                                                 | REGULATION OF/INTERACTION WITH CELLULAR ENVIRONMENT SUBCELLULAR LOCALISATION TRANSPORT FACILI              |
| CA2833 | 1.2 | 1.1 | 0.9 | 1.0     | PTC1                       | complemer protein serine/threonin             | orf19.4785  | 19963   | CaPTC1                                                 | C-compour protein phosphatase activity                                                                     |
| CA2834 | 1.6 | 1.0 | 1.2 | 1.0     | IPF12093                   | 9994618..9unknown function                    | orf19.4786  | 12093   | IPF12093                                               | UNCLASSIFIED PROTEINS                                                                                      |
| CA2835 | 1.1 | 1.2 | 1.2 | 1.1     | IPF12091                   | 9996734..9Unknown function                    | orf19.4787  | 12091   | IPF12091                                               | CELL CYCLE AND DNA PROCESSING ""PROTEIN FATE [folding modification destination] ""CELLULAR TRANSPORT AND I |
| CA2836 | 1.5 | 1.2 | 1.3 | 0.8     | ARG5,6                     | complemer acetylglutamate kinase              | orf19.4788  | 12088   | CaARG5,6                                               | Amino acid oxidoreductase activity,transferase activity                                                    |
| CA2837 | 0.8 | 1.3 | 1.0 | 1.0     | IPF8340                    | complemer unknown function                    | orf19.4789  | 8340    | IPF8340                                                | No significant S.c. match                                                                                  |
| CA2838 | 1.0 | 1.3 | 1.0 | 1.0     | IPF8339                    | complemer unknown function                    | orf19.4791  | 8339    | IPF8339                                                | No significant S.c. match                                                                                  |
| CA2839 | 0.9 | 1.2 | 0.7 | 1.1     | IPF8336                    | complemer unknown function                    | orf19.4792  | 8336    | IPF8336                                                | No significant S.c. match                                                                                  |
| CA2841 | 1.0 | 0.9 | 0.9 | 0.9     | IPF12981                   | 10012740..unknown function                    | orf19.5727  | 12981   | IPF12981                                               | No significant S.c. match                                                                                  |
| CA2842 | 1.1 | 1.0 | 1.2 | 0.9     | ALK5.3F                    | complemer n-alkane-inducible cytochrome P-45  |             | 18405   | CaALK5.3f                                              | CELL RESCUE DEFENSE AND VIRULENCE ""CELL FATE CONTROL OF CELLULAR ORGANIZATION                             |
| CA2843 | 1.9 | 1.2 | 1.1 | 0.8     | ALK5.5F                    | complemer n-alkane-inducible cytc             | orf19.5728  | 13156   | CaALK5.5f                                              | CELL RESCUE DEFENSE AND VIRULENCE ""CELL FATE CONTROL OF CELLULAR ORGANIZATION                             |
| CA2844 | 1.0 | 1.1 | 1.2 | 1.1     | IPF13158                   | 10021410..unknown function                    | orf19.5729  | 13158   | IPF13158                                               | Amino acid metabolism TRANSCRIPTION SUBCELLULAR LOCALISATION                                               |
| CA2845 | 1.1 | 1.0 | 0.9 | 1.2     | IPF10782                   | complemer unknown function                    | orf19.5730  | 10782   | IPF10782                                               | UNCLASSI molecular_function unknown                                                                        |
| CA2846 | 0.5 | 1.0 | 1.0 | 0.9     | PAD1                       | 10025559..phenylacrylic acid dec              | orf19.5731  | 10783   | CaPAD1                                                 | CELL RES lyase activity                                                                                    |
| CA2847 | 1.7 | 1.2 | 1.0 | 1.3     | IPF10785.F                 | 10026553..unknown function, exo               | orf19.5732  | 10785   | IPF10785.F                                             | UNCLASSI hydrolase activity                                                                                |
| CA2848 | 1.0 | 1.3 | 1.2 | 1.0     | IPF10785.E                 | 10028105..unknown function, exo               | orf19.5733  | 10786   | IPF10785.E                                             | UNCLASSIFIED PROTEINS                                                                                      |
| CA2849 | 1.4 | 1.0 | 0.8 | 1.1     | POP2                       | complemer required for glucose de             | orf19.5734  | 10787   | CaPOP2                                                 | C-compour RNA binding                                                                                      |
| CA2850 | 0.9 | 1.1 | 1.0 | 1.0     | CDC50                      | complemer cell division cycle muta            | orf19.5735  | 10789   | CaCDC50                                                | CELL CYC transcription regulator activity                                                                  |
| CA2852 | 1.1 | 0.9 | 1.2 | 1.2     | ALS5                       | complemer agglutinin-like protein             | orf19.5736  | 19771   | CaALS5                                                 | CELL FATE SUBCELLULAR LOCALISATION Other virulence attributes                                              |
| CA2853 | 1.5 | 1.0 | 0.9 | 1.2     | IPF17057                   | 10043344..unknown function                    | orf19.1070  | 17057   | IPF17057                                               | UNCLASSI molecular_function unknown                                                                        |
| CA2854 | 1.8 | 2.6 | 2.1 | 1.4     | RPN4                       | complemer 26S proteasome subur                | orf19.1069  | 7070    | CaRPN4                                                 | PROTEIN †peptidase activity                                                                                |
| CA2855 | 1.4 | 1.0 | 1.0 | 0.9     | GPM2                       | complemer phosphoglycerate mut                | orf19.1067  | 7065    | CaGPM2                                                 | C-compound and carbohydrate metabolism ENERGY SUBCELLULAR LOCALISATION                                     |
| CA2856 | 1.1 | 1.3 | 0.9 | 1.1     | IPF7062                    | 10050750..unknown function                    | orf19.1066  | 7062    | IPF7062                                                | UNCLASSI molecular_function unknown                                                                        |
| CA2857 | 0.5 | 1.1 | 0.7 | 0.9     | SSA1                       | 10052114..Heat shock protein of h             | orf19.1065  | 7060    | CaSSA1                                                 | CELL RESCUE DEFENSE AND VIRULENCE ""SUBCELLULAR LOCALISATION                                               |
| CA2858 | 2.4 | 0.9 | 1.2 | 1.5     | ACS2                       | 10056401..acetyl-coenzyme-A syr               | orf19.1064  | 7057    | CaACS2                                                 | C-compour ligase activity                                                                                  |
| CA2859 | 1.5 | 1.0 | 1.0 | 0.9     | IPF7056                    | 10058692..unknown function                    | orf19.1063  | 7056    | IPF7056                                                | UNCLASSI molecular_function unknown                                                                        |
| CA2860 | 0.9 | 1.0 | 1.0 | 1.1     | IPF7054                    | 10060272..unknown function                    | orf19.1062  | 7054    | IPF7054                                                | No significant S.c. match                                                                                  |
| CA2861 | 0.6 | 1.6 | 1.7 | 1.1     | HHT21                      | complemer Histone H3                          | orf19.1061  | 7053    | CaHHT21                                                | TRANSCR DNA binding                                                                                        |
| CA2862 | 0.1 | 0.2 | 0.7 | 1.0     | HHF21                      | 10063170..histone H4                          | orf19.1059  | 7050    | CaHHF21                                                | TRANSCR DNA binding                                                                                        |

|        |     |     |     |     |            |                                                  |             |       |            |                                               |                                                                                    |
|--------|-----|-----|-----|-----|------------|--------------------------------------------------|-------------|-------|------------|-----------------------------------------------|------------------------------------------------------------------------------------|
| CA2863 | 1.2 | 1.1 | 0.9 | 0.9 | IPF20117   | complemer unknown function                       | orf19.1058  | 20117 | IPF20117   | UNCLASSI                                      | peptidase activity                                                                 |
| CA2864 | 0.9 | 1.0 | 1.0 | 0.8 | IPF17234.3 | 10065092..unknown function, 3-pr                 | orf19.1057  | 17234 | IPF17234.3 | No significant S.c. match                     |                                                                                    |
| CA2866 | 0.8 | 0.7 | 0.9 | 1.0 | RHO1       | complemer GTP-binding protein of                 | orf19.2843  | 11690 | CaRHO1     | C-compour signal transducer activity          |                                                                                    |
| CA2867 | 1.0 | 0.9 | 0.9 | 1.1 | IPF11688   | 10079064..similar to Saccharomy                  | orf19.2844  | 11688 | IPF11688   | PROTEIN I                                     | protein binding                                                                    |
| CA2868 | 1.0 | 1.2 | 1.1 | 0.9 | IPF20118   | 10082128..unknown function                       | orf19.2846  | 20118 | IPF20118   | No significant S.c. match                     |                                                                                    |
| CA2869 | 1.3 | 1.2 | 1.0 | 1.1 | RPC82      | complemer DNA-directed RNA pol                   | orf19.2847  | 15457 | CaRPC82    | TRANSCR                                       | nucleotidyltransferase activity                                                    |
| CA2870 | 1.9 | 1.4 | 1.4 | 1.6 | OPT2.53F   | 10084983..Oligopeptide transporter, internal fra |             | 17923 | CaOPT2.5   | TRANSPORT FACILITATION                        |                                                                                    |
| CA2871 | 1.8 | 1.2 | 1.3 | 0.9 | OPT2.3F    | 10085454..Oligopeptide transport                 | orf19.2847  | 17924 | CaOPT2.3   | TRANSPORT FACILITATION                        |                                                                                    |
| CA2872 | 1.0 | 1.3 | 0.8 | 1.1 | APG13      | 10088575..probable component o                   | orf19.2848  | 10707 | CaAPG13    | PROTEIN I                                     | protein binding                                                                    |
| CA2873 | 1.1 | 1.6 | 1.2 | 1.1 | AQY1       | complemer similarity to plasma me                | orf19.2849  | 10705 | CaAQY1     | TRANSPOR                                      | transporter activity                                                               |
| CA2874 | 0.7 | 1.3 | 0.9 | 1.1 | IPF4999    | 10101550..unknown function                       | orf19.5843  | 4999  | IPF4999    | No significant S.c. match                     |                                                                                    |
| CA2875 | 0.8 | 0.8 | 1.3 | 0.9 | MEI5       | 10105914..meiotic protein (by hon                | orf19.5844  | 17969 | CaMEI5     | CELL CYC                                      | molecular_function unknown                                                         |
| CA2876 | 1.6 | 1.0 | 1.1 | 0.9 | RNR2       | 10106787..Ribonucleotide reducte                 | orf19.5845  | 3774  | CaRNR2     | Nucleotide metabolism                         | CELL CYCLE AND DNA PROCESSING                                                      |
| CA2877 | 0.8 | 1.1 | 0.7 | 1.1 | TFB2       | complemer Transcription/repair fac               | orf19.5846  | 3776  | CaTFB2     | CELL CYC                                      | transcription regulator activity                                                   |
| CA2878 | 0.8 | 0.9 | 0.8 | 0.9 | RET1       | 10111192..DNA-directed RNA pol                   | orf19.5847  | 3777  | CaRET1     | TRANSCR                                       | nucleotidyltransferase activity                                                    |
| CA2879 | 1.5 | 1.2 | 1.0 | 0.9 | IPF3779    | 10115248..unknown function                       | orf19.5848  | 3779  | IPF3779    | UNCLASSIFIED                                  | PROTEINS                                                                           |
| CA2880 | 1.0 | 1.1 | 1.0 | 0.9 | IPF3781    | 10117617..unknown function                       | orf19.5849  | 3781  | IPF3781    | TRANSCR                                       | DNA binding,transcription regulator activity                                       |
| CA2881 | 1.4 | 1.0 | 1.1 | 0.9 | RAD4       | complemer Excision repair protein                | orf19.5850  | 3784  | CaRAD4     | CELLULAF                                      | molecular_function unknown                                                         |
| CA2882 | 1.3 | 1.1 | 1.1 | 0.9 | STE13      | complemer type IV dipeptidyl amin                | orf19.5851  | 3786  | CaSTE13    | PROTEIN I                                     | peptidase activity                                                                 |
| CA2883 | 1.2 | 1.2 | 1.3 | 1.2 | IPF3790    | 10125186..unknown function                       | orf19.5852  | 3790  | IPF3790    | CELLULAR                                      | TRANSPORT AND TRANSPORT MECHANISMS SUBCELLULAR LOCALISATION                        |
| CA2884 | 1.6 | 1.0 | 1.2 | 1.0 | IPF7201    | complemer similar to Saccharomy                  | orf19.2476  | 7201  | IPF7201    | CONTROL                                       | molecular_function unknown                                                         |
| CA2885 | 0.8 | 0.9 | 0.9 | 0.9 | IPF7204    | complemer unknown function                       | orf19.2475  | 7204  | IPF7204    | No significant S.c. match                     |                                                                                    |
| CA2886 | 0.6 | 1.0 | 0.9 | 1.0 | IPF7207    | 10141237..unknown function                       | orf19.2473  | 7207  | IPF7207    | UNCLASSI                                      | DNA binding                                                                        |
| CA2887 | 0.7 | 1.2 | 0.9 | 0.9 | IPF13631   | complemer unknown function                       | orf19.2472  | 13631 | IPF13631   | No significant S.c. match                     |                                                                                    |
| CA2888 | 0.8 | 0.7 | 0.9 | 1.2 | GIM5       | 10144589..Gim complex compone                    | orf19.2471  | 13630 | CaGIM5     | PROTEIN I                                     | protein binding                                                                    |
| CA2889 | 1.0 | 1.0 | 1.0 | 1.0 | IPF13628   | complemer putative DNA repair pri                | orf19.2469  | 13628 | IPF13628   | CELL CYC                                      | DNA binding                                                                        |
| CA2890 | 0.9 | 0.9 | 1.0 | 0.9 | IPF13626   | 10146672..Putative methyltransfer                | orf19.2468  | 13626 | IPF13626   | UNCLASSI                                      | transferase activity                                                               |
| CA2891 | 0.9 | 1.0 | 1.0 | 1.0 | IFS4       | 10148151..Pirin protein (by homol                | orf19.2467  | 6686  | CaIFS4     | No significant S.c. match                     |                                                                                    |
| CA2892 | 0.9 | 0.8 | 0.9 | 0.9 | IPF6688    | 10149496..unknown function                       | orf19.2465  | 6688  | IPF6688    | No significant S.c. match                     |                                                                                    |
| CA2893 | 0.9 | 0.9 | 1.0 | 1.0 | IFS3       | 10151006..Unknown function                       | orf19.2463  | 6690  | CaIFS3     | UNCLASSIFIED                                  | PROTEINS                                                                           |
| CA2894 | 1.2 | 1.0 | 1.0 | 1.1 | IFS2       | 10152524..Unknown function                       | orf19.2462  | 6691  | CaIFS2     | No significant S.c. match                     |                                                                                    |
| CA2895 | 1.1 | 1.1 | 1.0 | 1.0 | IFS1       | 10154280..Unknown function                       | orf19.2461  | 6694  | CaIFS1     | UNCLASSIFIED                                  | PROTEINS                                                                           |
| CA2896 | 1.2 | 1.0 | 1.5 | 1.0 | IPF14981   | complemer unknown function                       | orf19.3483  | 14981 | IPF14981   | UNCLASSI                                      | molecular_function unknown                                                         |
| CA2897 | 1.1 | 1.2 | 1.0 | 0.8 | IPF14979   | complemer similar to Saccharomy                  | orf19.3482  | 14979 | IPF14979   | Nucleotide                                    | hydrolase activity                                                                 |
| CA2898 | 1.0 | 0.9 | 1.0 | 1.1 | IPF15646   | complemer putative ATP-depende                   | orf19.3481  | 15646 | IPF15646   | UNCLASSI                                      | RNA binding,helicase activity                                                      |
| CA2899 | 1.9 | 0.9 | 1.0 | 0.8 | IPF17681   | 10164782..similar to Saccharomy                  | orf19.3480  | 17681 | IPF17681   | CLASSIFIC                                     | structural molecule activity                                                       |
| CA2900 | 0.9 | 0.7 | 1.0 | 1.1 | NIP7       | complemer required for efficient 6C              | orf19.3478  | 11733 | CaNIP7     | TRANSCR                                       | molecular_function unknown                                                         |
| CA2901 | 1.0 | 0.8 | 1.7 | 1.0 | PUS1       | 10167784..pseudouridine synthas                  | orf19.3477  | 11730 | CaPUS1     | Nucleotide                                    | lyase activity                                                                     |
| CA2902 | 1.1 | 0.9 | 1.3 | 1.1 | HRR25      | complemer casein kinase I (by hor                | orf19.3476  | 11729 | CaHRR25    | CELL CYC                                      | protein kinase activity                                                            |
| CA2903 | 0.5 | 0.8 | 0.4 | 1.2 | IPF11725   | complemer unknown function                       | orf19.10979 | 11725 | IPF11725   | No significant S.c. match                     |                                                                                    |
| CA2904 | 0.9 | 1.0 | 1.0 | 1.0 | IPL1       | 10177676..Ser/thr protein kinase                 | (orf19.3474 | 12051 | CaIPL1     | CELL CYC                                      | protein kinase activity                                                            |
| CA2905 | 0.8 | 1.0 | 0.9 | 1.1 | IPF12049   | complemer unknown function                       | orf19.10977 | 12049 | IPF12049   | UNCLASSI                                      | molecular_function unknown                                                         |
| CA2906 | 0.6 | 0.9 | 0.7 | 1.0 | IPF15523   | complemer unknown function                       | orf19.4521  | 15523 | IPF15523   | CLASSIFIC                                     | oxidoreductase activity                                                            |
| CA2907 | 1.0 | 1.0 | 0.8 | 1.0 | IPF15525   | complemer putative gluconokinase                 | orf19.4520  | 15525 | IPF15525   | C-compour                                     | molecular_function unknown                                                         |
| CA2908 | 0.9 | 1.2 | 0.8 | 0.9 | SUV3       | complemer ATP-dependent RNA t                    | orf19.4519  | 15527 | CaSUV3     | Nucleotide                                    | RNA binding,helicase activity                                                      |
| CA2909 | 0.7 | 0.9 | 0.9 | 0.9 | IPF11424   | 10190600..unknown function                       | orf19.4518  | 11424 | IPF11424   | UNCLASSI                                      | protein kinase activity                                                            |
| CA2910 | 0.9 | 1.2 | 1.1 | 1.3 | IPF11421   | 10193868..unknown function                       | orf19.4517  | 11421 | IPF11421   | No significant S.c. match                     |                                                                                    |
| CA2911 | 0.8 | 1.0 | 1.1 | 1.1 | MET7       | complemer folylpolyglutamate synt                | orf19.4516  | 11419 | CaMET7     | Metabolism                                    | ligase activity                                                                    |
| CA2912 | 0.7 | 1.1 | 0.8 | 0.9 | IPF11206   | 10197825..unknown function                       | orf19.4515  | 11206 | IPF11206   | CELL RESCUE                                   | DEFENSE AND VIRULENCE ""CELL FATE                                                  |
| CA2913 | 1.7 | 1.2 | 1.3 | 1.0 | IPF11205   | 10199936..unknown function                       | orf19.4513  | 11205 | IPF11205   | Lipid fatty-acid and isoprenoid metabolism "" | CELL CYCLE AND DNA PROCESSING CELLULAR COMMUNICATION/SIGNAL                        |
| CA2914 | 1.1 | 1.2 | 0.9 | 1.1 | IFA17.5F   | 10201694..unknown function, 5-pr                 | orf19.4512  | 11203 | CaIFA17.5  | No significant S.c. match                     |                                                                                    |
| CA2915 | 0.5 | 0.9 | 1.0 | 1.0 | IFA17.3F   | 10202423..unknown function, 3-pr                 | orf19.4511  | 11201 | CaIFA17.3  | Nucleotide metabolism                         | CELL CYCLE AND DNA PROCESSING CELLULAR COMMUNICATION/SIGNAL TRANSDUCTION M         |
| CA2916 | 1.0 | 0.9 | 1.0 | 0.9 | IFA4       | 10204695..unknown function                       | orf19.4510  | 11199 | CaIFA4     | Nucleotide metabolism                         | CELL CYCLE AND DNA PROCESSING CELLULAR COMMUNICATION/SIGNAL TRANSDUCTION M         |
| CA2917 | 1.0 | 1.0 | 0.9 | 0.9 | IPF16173.3 | 10207753..Unknown function, 5-p                  | orf19.4509  | 16177 | IPF16173.3 | No significant S.c. match                     |                                                                                    |
| CA2918 | 1.5 | 0.9 | 1.2 | 1.0 | IPF16173.1 | 10208060..unknown function, 3-pr                 | orf19.4508  | 16174 | IPF16173.1 | No significant S.c. match                     |                                                                                    |
| CA2919 | 1.0 | 1.0 | 1.2 | 0.9 | IFA18.3    | 10208768..unknown function, 3-pr                 | orf19.4507  | 16173 | CaIFA18.3  | Nucleotide metabolism                         | CELL CYCLE AND DNA PROCESSING CELLULAR COMMUNICATION/SIGNAL TRANSDUCTION M         |
| CA2920 | 3.6 | 0.9 | 0.6 | 1.3 | FET5       | complemer multicopy oxidase (by l                | orf19.4215  | 17039 | CaFET5     | CELLULAR                                      | TRANSPORT AND TRANSPORT MECHANISMS REGULATION OF/INTERACTION WITH CELLULAR ENVIRON |
| CA2921 | 0.9 | 0.9 | 1.0 | 0.9 | IPF17037   | complemer unknown function                       | orf19.4214  | 17037 | IPF17037   | ENERGY                                        |                                                                                    |
| CA2922 | 1.1 | 1.0 | 1.0 | 1.0 | FET31      | complemer cell surface ferroxidase               | orf19.11689 | 17035 | CaFET31    | CELLULAR                                      | TRANSPORT AND TRANSPORT MECHANISMS REGULATION OF/INTERACTION WITH CELLULAR ENVIRON |
| CA2923 | 0.8 | 0.8 | 0.9 | 0.9 | FET32      | complemer cell surface ferroxidase               | orf19.11688 | 11905 | CaFET32    | CELLULAR                                      | TRANSPORT AND TRANSPORT MECHANISMS REGULATION OF/INTERACTION WITH CELLULAR ENVIRON |
| CA2924 | 0.5 | 0.4 | 0.8 | 1.0 | FET33      | complemer cell surface ferroxidase               | orf19.11687 | 11908 | CaFET33    | CELLULAF                                      | oxidoreductase activity                                                            |
| CA2925 | 0.9 | 0.7 | 1.2 | 1.1 | IPF7827    | 10229638..unknown function                       | orf19.4210  | 7827  | IPF7827    | UNCLASSI                                      | molecular_function unknown                                                         |
| CA2926 | 0.8 | 0.8 | 0.9 | 0.9 | UBA3       | complemer Ubiquitin-like protein a               | orf19.4209  | 7830  | CaUBA3     | PROTEIN                                       | FATE [folding modification destination]                                            |
| CA2927 | 0.9 | 0.9 | 0.9 | 0.9 | RAD52      | complemer Nuclear ribonucleoprot                 | orf19.4208  | 7833  | CaRAD52    | CELL CYC                                      | DNA binding                                                                        |
| CA2928 | 0.8 | 1.0 | 1.3 | 1.0 | SME1       | complemer Nuclear ribonucleoprotein E            |             | 7835  | CaSME1     | TRANSCR                                       | RNA binding                                                                        |
| CA2929 | 1.2 | 0.9 | 0.9 | 1.0 | IPF7838    | 10235491..similar to Saccharomy                  | orf19.4206  | 7838  | IPF7838    | CELL CYC                                      | hydrolase activity                                                                 |
| CA2930 | 0.8 | 1.0 | 1.1 | 1.1 | IPF7840    | 10237526..similar to Saccharomy                  | orf19.4204  | 7840  | IPF7840    | PROTEIN I                                     | structural molecule activity                                                       |
| CA2931 | 1.8 | 0.9 | 1.0 | 1.1 | IPF7841    | 10238778..similar to Saccharomy                  | orf19.4203  | 7841  | IPF7841    | CELL CYC                                      | structural molecule activity                                                       |
| CA2932 | 1.7 | 1.1 | 1.0 | 1.0 | NHX1       | complemer NA+H+ antiporter                       | orf19.11677 | 7842  | CaNHX1     | CELLULAF                                      | transporter activity                                                               |
| CA2934 | 0.9 | 1.0 | 1.0 | 1.1 | IPF11515   | 10249547..similar to Saccharomy                  | orf19.3329  | 11515 | IPF11515   | Lipid fatty- $\epsilon$                       | hydrolase activity                                                                 |
| CA2935 | 1.0 | 0.8 | 1.0 | 1.1 | IPF11521   | 10254612..unknown function                       | orf19.3328  | 11521 | IPF11521   | UNCLASSI                                      | transcription regulator activity                                                   |



|        |     |     |     |     |            |                                                    |       |            |                                                                                                         |
|--------|-----|-----|-----|-----|------------|----------------------------------------------------|-------|------------|---------------------------------------------------------------------------------------------------------|
| CA2936 | 0.5 | 1.1 | 1.0 | 0.9 | IPF8326    | 102566835..similar to Saccharomy orf19.3327        | 8326  | IPF8326    | TRANSSCR transferase activity                                                                           |
| CA2937 | 0.4 | 0.7 | 1.1 | 0.9 | RPS21B.3   | 10259199..ribosomal protein S21, 3-prime end       | 8325  | CaRPS21B   | PROTEIN (structural molecule activity                                                                   |
| CA2938 | 1.2 | 1.1 | 0.9 | 1.0 | IPF8321    | 10261346..similar to Saccharomy orf19.3325         | 8321  | IPF8321    | C-compour transferase activity                                                                          |
| CA2939 | 0.6 | 0.5 | 0.7 | 0.9 | TIF1       | 10264139.. translation initiation fac orf19.3324   | 8319  | CaTIF1     | PROTEIN (translation regulator activity                                                                 |
| CA2940 | 0.5 | 0.9 | 0.8 | 1.0 | IPF8318    | 10265728..unknown function orf19.3323              | 8318  | IPF8318    | SUBCELLULAR LOCALISATION                                                                                |
| CA2941 | 1.1 | 1.0 | 0.8 | 1.1 | CVB1       | complemer vacuole biogenesis co orf19.1970         | 6289  | CaCVB1     | No significant S.c. match                                                                               |
| CA2942 | 1.4 | 1.0 | 1.0 | 0.8 | IPF6291    | 10270806..Secretory Stress Resp orf19.1969         | 6291  | IPF6291    | No significant S.c. match                                                                               |
| CA2943 | 1.0 | 0.9 | 1.1 | 0.8 | MAK31      | complemer Involved in stability of L-A dsRNA-cc    | 6293  | CaMAK31    | No significant transferase activity                                                                     |
| CA2944 | 0.8 | 1.0 | 0.9 | 1.0 | IPF6294    | 10272504..unknown function orf19.1968              | 6294  | IPF6294    | No significant S.c. match                                                                               |
| CA2945 | 1.4 | 0.9 | 0.9 | 0.9 | IMG1       | complemer Ribosomal protein, mit orf19.1967        | 6295  | CaIMG1     | ENERGY F structural molecule activity                                                                   |
| CA2946 | 0.9 | 1.1 | 1.4 | 1.0 | IPF6296    | complemer putative methyltransfer orf19.1966       | 6296  | IPF6296    | CLASSIFIC transferase activity                                                                          |
| CA2947 | 0.5 | 0.6 | 0.5 | 1.0 | IPF6298    | complemer unknown function orf19.1964              | 6298  | IPF6298    | No significant S.c. match                                                                               |
| CA2948 | 1.5 | 1.3 | 1.0 | 0.8 | GDS1       | complemer nam9-1 suppressor (b) orf19.1963         | 6301  | CaGDS1     | CLASSIFIC molecular_function unknown                                                                    |
| CA2949 | 1.3 | 1.1 | 1.0 | 0.9 | IPF14506   | complemer unknown function orf19.9516              | 14506 | IPF14506   | No significant S.c. match                                                                               |
| CA2950 | 1.6 | 1.2 | 1.3 | 1.3 | CLN2       | complemer G1/S-SPECIFIC CYCL orf19.9515            | 10874 | CaCLN2     | CELL CYC protein kinase activity,enzyme regulator activity                                              |
| CA2951 | 0.9 | 0.9 | 1.2 | 1.3 | SBP1       | 10299689..RNA binding protein-lik orf19.5854       | 10692 | CaSBP1     | TRANSSCR RNA binding                                                                                    |
| CA2952 | 0.9 | 1.0 | 0.7 | 1.0 | IPF19671   | 10301502..unknown function                         | 19671 | IPF19671   | Lipid fatty-acid and isoprenoid metabolism ""SUBCELLULAR LOCALISATION TRANSPORT FACILITATION            |
| CA2953 | 1.0 | 1.0 | 0.9 | 1.0 | MBP1       | complemer transcription factor (b) orf19.5855      | 10688 | CaMBP1     | CELL CYC DNA binding                                                                                    |
| CA2954 | 0.7 | 1.2 | 0.9 | 1.0 | IPF10685   | complemer unknown function orf19.5856              | 10685 | IPF10685   | SUBCELLULAR LOCALISATION                                                                                |
| CA2955 | 0.7 | 1.1 | 1.0 | 0.9 | IPF15201   | 10306785..Unknown function orf19.5857              | 15201 | IPF15201   | No significant S.c. match                                                                               |
| CA2956 | 0.6 | 0.6 | 1.3 | 0.9 | EGD2       | complemer Nascent polypeptide a: orf19.5858        | 15200 | CaEGD2     | C-compour chaperone activity                                                                            |
| CA2957 | 0.8 | 0.9 | 1.1 | 0.9 | DAL53      | 10309893..allantoate permease (t orf19.5859        | 8598  | CaDAL53    | CELLULAR TRANSPORT AND TRANSPORT MECHANISMS SUBCELLULAR LOCALISATION TRANSPORT FACILITATION             |
| CA2958 | 0.8 | 0.7 | 1.0 | 0.9 | KRE9       | 10313399..cell wall synthesis prot orf19.5861      | 8595  | CaKRE9     | C-compour molecular_function unknown                                                                    |
| CA2959 | 0.9 | 0.8 | 0.8 | 1.0 | IPF8591    | 10315498..putative arginase famil orf19.5862       | 8591  | IPF8591    | Amino acid metabolism Nitrogen and sulphur metabolism SUBCELLULAR LOCALISATION                          |
| CA2960 | 0.8 | 0.9 | 1.0 | 1.0 | IPF8590    | 10317643..unknown function orf19.5863              | 8590  | IPF8590    | No significant S.c. match                                                                               |
| CA2961 | 1.0 | 0.9 | 1.1 | 1.1 | URK1       | complemer uridine kinase (b) orf19.5864            | 8589  | CaURK1     | Nucleotide transferase activity                                                                         |
| CA2962 | 1.1 | 0.8 | 0.8 | 1.1 | PRP2       | 10320357..RNA-dependent ATPa orf19.5865            | 8587  | CaPRP2     | TRANSSCR RNA binding,helicase activity                                                                  |
| CA2963 | 0.6 | 1.1 | 1.1 | 1.0 | GRP3       | complemer dihydroflavonol-4-redu orf19.5611        | 13178 | CaGRP3     | Metabolism oxidoreductase activity                                                                      |
| CA2964 | 1.3 | 1.5 | 1.1 | 1.3 | IPF13176.3 | complemer ornithine carbamoyltra orf19.5610        | 13176 | IPF13176.3 | Amino acid transferase activity                                                                         |
| CA2965 | 1.1 | 1.0 | 1.0 | 0.8 | IPF13174   | complemer unknown function orf19.5609              | 13174 | IPF13174   | No significant S.c. match                                                                               |
| CA2966 | 1.2 | 1.0 | 1.0 | 0.8 | RPC34      | 10334066..DNA-directed RNA pol orf19.5608          | 16279 | CaRPC34    | TRANSSCR nucleotidyltransferase activity                                                                |
| CA2967 | 1.1 | 1.1 | 1.0 | 1.1 | IPF12513   | 10338043..unknown function orf19.5605              | 12513 | IPF12513   | UNCLASSI protein binding                                                                                |
| CA2968 | 0.6 | 1.1 | 0.9 | 0.9 | BMR1       | 10342240..benomyl/methothreoxat orf19.5604         | 16346 | CaBMR1     | CELL RES transporter activity                                                                           |
| CA2969 | 0.9 | 1.1 | 1.0 | 1.1 | IPF19772   | 10345160..unknown function orf19.5602              | 19772 | IPF19772   | No significant S.c. match                                                                               |
| CA2970 | 0.9 | 1.1 | 1.1 | 0.9 | IPF14448   | 10347311..unknown function orf19.5601              | 14448 | IPF14448   | No significant S.c. match                                                                               |
| CA2971 | 1.1 | 1.0 | 0.9 | 1.1 | MDL2.5F    | 10348887..ATP-binding transporte orf19.5600        | 14449 | CaMDL2.5I  | TRANSPORT FACILITATION                                                                                  |
| CA2972 | 1.1 | 1.1 | 1.0 | 0.9 | MDL2.3F    | 10350636..ATP-binding transporte orf19.5599        | 20121 | CaMDL2.3I  | TRANSPORT FACILITATION                                                                                  |
| CA2973 | 0.9 | 0.9 | 0.8 | 0.8 | IPF14452.F | complemer F1-ATPase epsilon subunit (b) orf19.5598 | 14452 | IPF14452.F | No significant S.c. match                                                                               |
| CA2974 | 4.5 | 2.4 | 2.3 | 2.3 | IPF12540   | 10359969..unknown function orf19.8824              | 12540 | IPF12540   | No significant S.c. match                                                                               |
| CA2975 | 0.8 | 0.7 | 0.6 | 0.9 | ARO9       | 10363904..aromatic amino acid ar orf19.8822        | 14677 | CaARO9     | Amino acid transferase activity                                                                         |
| CA2976 | 0.6 | 1.0 | 0.7 | 1.1 | IPF14676   | 10365923..unknown function orf19.8821              | 14676 | IPF14676   | UNCLASSI molecular_function unknown                                                                     |
| CA2977 | 1.3 | 1.1 | 0.9 | 0.8 | HOM3       | complemer Aspartokinase (b) orf19.1235             | 14675 | CaHOM3     | Amino acid transferase activity                                                                         |
| CA2979 | 0.9 | 1.3 | 0.9 | 0.9 | ADE4       | complemer amidophosphoribosyltr orf19.1233         | 13283 | CaADE4     | Nucleotide transferase activity                                                                         |
| CA2980 | 0.6 | 1.0 | 0.8 | 1.2 | GOG5       | 10390348..GDP-mannose transpc orf19.1232           | 13284 | CaGOG5     | CELLULAF transporter activity                                                                           |
| CA2981 | 0.9 | 1.1 | 1.1 | 1.0 | CSE1.5F    | 10392640..Importin-beta-like prote orf19.1231      | 13285 | CaCSE1.5I  | PROTEIN I protein binding                                                                               |
| CA2982 | 1.0 | 0.9 | 1.0 | 0.9 | CSE1.3F    | 10394151..Importin-beta-like prote orf19.8815      | 16520 | CaCSE1.3I  | PROTEIN FATE [folding modification destination] ""CELLULAR TRANSPORT AND TRANSPORT MECHANISMS CONTROL C |
| CA2983 | 1.1 | 0.9 | 1.0 | 1.0 | IPF18396   | complemer unknown function orf19.8814              | 18396 | IPF18396   | No significant S.c. match                                                                               |
| CA2984 | 1.3 | 1.2 | 1.1 | 1.1 | IPF12606.3 | 10397204..unknown function, 3-prime end            | 5109  | IPF12606.3 | UNCLASSIFIED PROTEINS                                                                                   |
| CA2985 | 0.9 | 1.1 | 1.2 | 1.1 | SET1       | 10399009..Chromatin regulatory p orf19.6009        | 5105  | CaSET1     | CELL CYC transferase activity                                                                           |
| CA2986 | 1.0 | 0.8 | 0.6 | 1.0 | CDC5       | 10403402..Cell-cycle protein kinas orf19.6010      | 5102  | CaCDC5     | CELL CYC protein kinase activity                                                                        |
| CA2987 | 0.5 | 1.1 | 0.9 | 1.0 | RPB11.3    | complemer DNA-directed RNA polymerase II su        | 5100  | CaRPB11.3  | TRANSSCR nucleotidyltransferase activity                                                                |
| CA2988 | 1.1 | 1.0 | 1.1 | 0.9 | SIN3.EXO1  | 10407146..Histone deacetylase by homology          | 5097  | CaSIN3.ex  | Lipid fatty-acid and isoprenoid metabolism ""TRANSCRIPTION CELL FATE SUBCELLULAR LOCALISATION           |
| CA2989 | 1.6 | 1.3 | 0.9 | 1.3 | SIN3.EXO1  | 10407748..Histone deacetylase b) orf19.6011        | 5096  | CaSIN3.ex  | Lipid fatty-ε hydrolase activity                                                                        |
| CA2990 | 1.4 | 0.9 | 1.3 | 0.9 | IPF5092    | complemer unknown function orf19.6012              | 5092  | IPF5092    | UNCLASSI molecular_function unknown                                                                     |
| CA2991 | 0.8 | 1.0 | 1.2 | 0.9 | IPF5088.3  | complemer unknown function, 3-pr orf19.6013        | 5088  | IPF5088.3  | UNCLASSI molecular_function unknown                                                                     |
| CA2992 | 0.9 | 0.9 | 1.0 | 1.4 | RRS1       | complemer Regulator for ribosome orf19.6014        | 5085  | CaRRS1     | TRANSSCR molecular_function unknown                                                                     |
| CA2993 | 0.9 | 0.9 | 0.9 | 1.0 | IPF9118    | complemer unknown function orf19.6118              | 9118  | IPF9118    | CELLULAF enzyme regulator activity                                                                      |
| CA2994 | 1.3 | 1.0 | 1.1 | 0.9 | IPF9116    | 10425599..unknown function orf19.6119              | 9116  | IPF9116    | No significant S.c. match                                                                               |
| CA2995 | 1.6 | 1.0 | 1.0 | 0.7 | IPF9113    | 10428585..unknown function orf19.6121              | 9113  | IPF9113    | TRANSSCR molecular_function unknown                                                                     |
| CA2996 | 1.1 | 1.1 | 1.0 | 1.1 | IPF9108    | complemer similar to Saccharomy orf19.6124         | 9108  | IPF9108    | C-compour transcription regulator activity                                                              |
| CA2997 | 1.3 | 0.8 | 1.1 | 1.0 | KGD2       | complemer 2-oxoglutarate dehydr orf19.6126         | 8851  | CaKGD2     | C-compour molecular_function unknown                                                                    |
| CA2998 | 0.6 | 0.5 | 0.8 | 1.0 | LPD1       | 10438250..dihydroliipoamide dehy orf19.6127        | 8847  | CaLPD1     | Amino acid transporter activity                                                                         |
| CA2999 | 1.3 | 1.1 | 1.0 | 0.8 | MRPL8      | 10440104..mitochondrial 60s ribos orf19.6129       | 8844  | CaMRPL8    | PROTEIN (structural molecule activity                                                                   |
| CA3000 | 1.1 | 0.9 | 0.9 | 1.0 | TSC1.5     | 10441073..3-ketosphinganine redi orf19.6131        | 8842  | CaTSC1.5   | Lipid fatty-ε oxidoreductase activity                                                                   |
| CA3001 | 0.6 | 0.9 | 1.2 | 1.2 | IPF8841    | complemer unknown function orf19.6132              | 8841  | IPF8841    | UNCLASSI molecular_function unknown                                                                     |
| CA3002 | 1.1 | 0.9 | 1.1 | 0.9 | PIF1       | complemer mitochondrial DNA hel orf19.6133         | 19673 | CaPIF1     | CELL CYC DNA binding,helicase activity                                                                  |
| CA3003 | 0.9 | 1.4 | 1.0 | 1.3 | IPF15741   | 10448869..similar to Saccharomy orf19.13620        | 15741 | IPF15741   | UNCLASSI molecular_function unknown                                                                     |
| CA3004 | 1.0 | 0.9 | 1.0 | 1.2 | KIN28      | 10452289..cyclin-dependent ser/t orf19.13619       | 15293 | CaKIN28    | CELL CYC protein kinase activity,transcription regulator activity                                       |
| CA3005 | 0.6 | 0.9 | 0.7 | 1.1 | CC43       | 10456995..Cell Division Control -li orf19.13617    | 19967 | CaCC43     | CELL CYCLE AND DNA PROCESSING CELLULAR COMMUNICATION/SIGNAL TRANSDUCTION MECHANISM REGULATI             |
| CA3006 | 0.7 | 1.0 | 1.1 | 0.9 | IPF12152   | complemer Unknown function orf19.13616             | 12152 | IPF12152   | UNCLASSI molecular_function unknown                                                                     |
| CA3007 | 0.9 | 1.4 | 0.9 | 0.9 | IPF12148   | complemer Unknown function orf19.13614             | 12148 | IPF12148   | UNCLASSI molecular_function unknown                                                                     |

|        |     |     |     |     |           |                                               |             |       |           |                                                                                                         |
|--------|-----|-----|-----|-----|-----------|-----------------------------------------------|-------------|-------|-----------|---------------------------------------------------------------------------------------------------------|
| CA3008 | 1.2 | 1.1 | 1.2 | 1.0 | IPF12147  | 10461455..unknown function                    | orf19.13613 | 12147 | IPF12147  | UNCLASSIFIED oxidoreductase activity                                                                    |
| CA3009 | 1.0 | 1.0 | 1.1 | 1.0 | MRPL19    | complemer Ribosomal protein (by               | orf19.13611 | 14569 | CaMRPL19  | PROTEIN structural molecule activity                                                                    |
| CA3010 | 0.9 | 1.0 | 1.3 | 1.0 | IPF14568  | 10467495..unknown function                    | orf19.13610 | 14568 | IPF14568  | UNCLASSIFIED enzyme regulator activity                                                                  |
| CA3011 | 9.6 | 3.9 | 5.3 | 1.2 | CTA1      | 10470262..catalase A, peroxisom               | orf19.6229  | 20124 | CaCTA1    | CELL RES oxidoreductase activity                                                                        |
| CA3012 | 1.3 | 1.0 | 1.0 | 0.8 | IPF14013  | 10472451..unknown function                    | orf19.6227  | 14013 | IPF14013  | No significant S.c. match                                                                               |
| CA3013 | 0.9 | 1.1 | 0.7 | 1.0 | PET117    | complemer cytochrome c oxidase assembly fact  |             | 20125 | CaPET117  | PROTEIN molecular_function unknown                                                                      |
| CA3014 | 1.3 | 0.9 | 1.0 | 0.8 | IPF11915  | 10476184..similar to Saccharomy               | orf19.13605 | 11915 | IPF11915  | CLASSIFIED protein kinase activity,enzyme regulator activity                                            |
| CA3015 | 0.6 | 1.0 | 1.1 | 1.1 | IPF10029  | 10480426..unknown function                    | orf19.11397 | 10029 | IPF10029  | UNCLASSIFIED molecular_function unknown                                                                 |
| CA3016 | 1.2 | 1.2 | 1.0 | 0.9 | IPF10027  | 10482517..unknown function                    | orf19.11396 | 10027 | IPF10027  | PROTEIN SYNTHESIS CELL FATE SUBCELLULAR LOCALISATION                                                    |
| CA3017 | 1.3 | 1.3 | 1.2 | 1.1 | IPF10021  | 10486002..unknown function                    | orf19.11393 | 10021 | IPF10021  | Nitrogen ar DNA binding,transcription regulator activity                                                |
| CA3018 | 0.8 | 0.5 | 0.8 | 1.0 | SAH1      | 10488537..S-adenosyl-L-homocys                | orf19.3911  | 10018 | CaSAH1    | Metabolism hydrolase activity                                                                           |
| CA3019 | 0.9 | 0.9 | 0.9 | 1.2 | IPF15494  | complemer putative ribonuclease (orf19.3910)  |             | 15494 | IPF15494  | Nucleotide metabolism                                                                                   |
| CA3020 | 0.8 | 1.0 | 0.8 | 0.8 | IPF15492  | complemer unknown function                    | orf19.3908  | 15492 | IPF15492  | CELL RESCUE DEFENSE AND VIRULENCE ""SUBCELLULAR LOCALISATION TRANSPORT FACILITATION UNCLASSIFIED        |
| CA3021 | 0.9 | 0.9 | 1.1 | 0.9 | IPF17640  | complemer unknown function                    | orf19.3906  | 17640 | IPF17640  | No significant S.c. match                                                                               |
| CA3022 |     |     |     |     | IPF17642  | complement(10495936..10496577)                |             |       |           |                                                                                                         |
| CA3023 | 1.8 | 1.2 | 1.3 | 1.0 | IPF11508  | 10497887..unknown function                    | orf19.3904  | 11508 | IPF11508  | CELL RESCUE DEFENSE AND VIRULENCE                                                                       |
| CA3024 | 1.2 | 0.7 | 1.2 | 1.0 | IPF11506  | complemer unknown function                    | orf19.3903  | 11506 | IPF11506  | Lipid fatty-acid and isoprenoid metabolism ""SUBCELLULAR LOCALISATION                                   |
| CA3025 | 2.4 | 3.2 | 3.5 | 1.3 | IPF11503  | complemer unknown function                    | orf19.3902  | 11503 | IPF11503  | CELLULAR TRANSPORT AND TRANSPORT MECHANISMS                                                             |
| CA3026 | 0.9 | 1.1 | 1.1 | 0.9 | IPF11499  | complemer unknown function                    | orf19.11382 | 11499 | IPF11499  | No significant S.c. match                                                                               |
| CA3027 | 1.0 | 1.3 | 0.9 | 1.1 | IPF20126  | complemer putative chromosome                 | orf19.11381 | 20126 | IPF20126  | UNCLASSIFIED transporter activity                                                                       |
| CA3028 | 1.1 | 0.9 | 1.2 | 1.1 | IPF18393  | complemer unknown function                    | orf19.11380 | 18393 | IPF18393  | UNCLASSIFIED PROTEINS                                                                                   |
| CA3029 | 2.0 | 1.1 | 1.1 | 0.8 | IPF13825  | 10509253..similarity to serine/thre           | orf19.223   | 13825 | IPF13825  | CLASSIFIED protein kinase activity                                                                      |
| CA3030 | 1.4 | 1.6 | 1.0 | 1.2 | IPF19968  | complemer putative cell wall protei           | orf19.220   | 19968 | IPF19968  | CELL RES structural molecule activity                                                                   |
| CA3031 | 0.6 | 1.0 | 1.0 | 1.1 | IPF12324  | 10520768..unknown function                    | orf19.217   | 12324 | IPF12324  | TRANSCR molecular_function unknown                                                                      |
| CA3032 | 1.1 | 1.4 | 1.2 | 1.0 | IPF12319  | complemer unknown function                    | orf19.216   | 12319 | IPF12319  | CELL RESCUE DEFENSE AND VIRULENCE                                                                       |
| CA3033 | 1.9 | 1.6 | 1.2 | 1.1 | IPF13202  | 10527690..unknown function                    | orf19.215   | 13202 | IPF13202  | UNCLASSIFIED molecular_function unknown                                                                 |
| CA3034 | 0.9 | 1.1 | 1.2 | 1.3 | RPN12     | 10529829..26S proteasome regul                | orf19.213   | 13198 | CaRPN12   | UNCLASSIFIED peptidase activity                                                                         |
| CA3035 | 0.7 | 1.1 | 1.0 | 0.9 | VPS28     | complemer involved in vacuolar tre            | orf19.212   | 13197 | CaVPS28   | CELLULAF molecular_function unknown                                                                     |
| CA3036 | 0.9 | 1.2 | 1.1 | 1.1 | IPF13443  | 10531753..unknown function                    | orf19.211   | 13443 | IPF13443  | No significant S.c. match                                                                               |
| CA3037 | 0.7 | 1.2 | 0.9 | 1.0 | IPF13442  | complemer unknown function                    | orf19.210   | 13442 | IPF13442  | UNCLASSIFIED molecular_function unknown                                                                 |
| CA3038 | 1.0 | 1.0 | 1.0 | 1.1 | IPF13438  | complemer unknown function                    | orf19.209   | 13438 | IPF13438  | CELL FAT molecular_function unknown                                                                     |
| CA3040 | 0.7 | 0.9 | 1.1 | 1.1 | IPF7306   | complemer putative permease (by               | orf19.2425  | 7306  | IPF7306   | C-compour molecular_function unknown                                                                    |
| CA3041 | 1.0 | 1.1 | 0.9 | 1.1 | IPF7303   | complemer unknown function                    | orf19.2423  | 7303  | IPF7303   | TRANSCR molecular_function unknown                                                                      |
| CA3042 | 1.2 | 0.8 | 1.0 | 0.7 | ARC1      | 10548031..G4 nucleic acid binding             | orf19.2422  | 7302  | CaARC1    | TRANSCR RNA binding                                                                                     |
| CA3043 | 1.4 | 1.2 | 0.9 | 0.7 | DOM34     | 10549385..probable involvement                | orf19.2419  | 7299  | CaDOM34   | CELL CYC molecular_function unknown                                                                     |
| CA3044 | 0.9 | 0.9 | 1.2 | 1.0 | IPF7298   | complemer unknown function                    | orf19.2418  | 7298  | IPF7298   | No significant S.c. match                                                                               |
| CA3045 | 0.7 | 0.9 | 0.7 | 0.8 | IPF7297.3 | complemer similar to Saccharomyces cerevisiae |             | 7297  | IPF7297.3 | CELL CYC motor activity                                                                                 |
| CA3046 | 0.8 | 1.0 | 1.3 | 1.1 | IPF7295   | 10552547..unknown function                    | orf19.2417  | 7295  | IPF7295   | CELL CYC molecular_function unknown                                                                     |
| CA3047 | 1.3 | 1.0 | 1.0 | 0.9 | MSE1      | 10555973..Mitochondrial glutamyl              | orf19.9953  | 7294  | CaMSE1    | PROTEIN ligase activity                                                                                 |
| CA3048 | 0.8 | 1.1 | 1.1 | 1.1 | IPF14991  | 10559150..unknown function                    | orf19.9950  | 14991 | IPF14991  | UNCLASSIFIED molecular_function unknown                                                                 |
| CA3049 | 1.5 | 1.0 | 1.1 | 0.7 | IPF14990  | complemer unknown function                    | orf19.9949  | 14990 | IPF14990  | UNCLASSIFIED transporter activity                                                                       |
| CA3050 | 1.0 | 1.0 | 1.0 | 1.0 | IPF13042  | 10561005..similar to Saccharomy               | orf19.9948  | 13042 | IPF13042  | PROTEIN molecular_function unknown                                                                      |
| CA3051 | 0.9 | 1.0 | 1.0 | 1.0 | IPF13043  | 10563863..unknown function                    | orf19.2408  | 13043 | IPF13043  | UNCLASSIFIED molecular_function unknown                                                                 |
| CA3052 | 0.5 | 0.7 | 0.8 | 1.4 | DPS1      | 10564964..aspartyl-tRNA synthet               | orf19.9945  | 13045 | CaDPS1    | PROTEIN ligase activity                                                                                 |
| CA3053 | 1.2 | 0.8 | 0.9 | 0.9 | GTR2      | 10567059..GTP-binding protein (b              | orf19.9944  | 13046 | CaGTR2    | UNCLASSIFIED hydrolase activity                                                                         |
| CA3055 | 1.0 | 1.0 | 0.9 | 1.0 | HIR2      | complemer Histone transcription re            | orf19.11771 | 2951  | CaHIR2    | TRANSCR transcription regulator activity                                                                |
| CA3056 | 1.4 | 0.8 | 1.0 | 0.7 | IPF2953   | complemer similar to Saccharomy               | orf19.4294  | 2953  | IPF2953   | CELLULAF molecular_function unknown                                                                     |
| CA3057 | 0.6 | 0.9 | 0.9 | 1.1 | IPF2954   | 10576198..unknown function                    | orf19.4293  | 2954  | IPF2954   | UNCLASSIFIED molecular_function unknown                                                                 |
| CA3058 | 0.9 | 1.1 | 0.9 | 1.1 | IPF2955   | complemer unknown function                    | orf19.4292  | 2955  | IPF2955   | PROTEIN FATE [folding modification destination] ""CELLULAR TRANSPORT AND TRANSPORT MECHANISMS SUBCELLUL |
| CA3059 | 0.4 | 0.4 | 0.9 | 1.0 | TRR1      | complemer Thioredoxin reductase               | orf19.11766 | 2959  | CaTRR1    | Nitrogen ar transporter activity                                                                        |
| CA3061 | 1.4 | 1.2 | 1.1 | 1.2 | IPF2965   | complemer unknown function                    | orf19.11763 | 2965  | IPF2965   | C-compound and carbohydrate metabolism                                                                  |
| CA3062 | 1.4 | 1.0 | 1.0 | 0.7 | IPF2968   | complemer unknown function                    | orf19.11762 | 2968  | IPF2968   | No significant S.c. match                                                                               |
| CA3063 | 0.8 | 1.3 | 1.1 | 1.2 | IPF2971   | complemer unknown function                    | orf19.4284  | 2971  | IPF2971   | CELL CYC protein kinase activity,enzyme regulator activity                                              |
| CA3064 | 0.9 | 1.2 | 0.9 | 1.0 | IPF2973   | 10589587..unknown function                    | orf19.4283  | 2973  | IPF2973   | PROTEIN FATE [folding modification destination] ""SUBCELLULAR LOCALISATION                              |
| CA3065 | 2.2 | 1.2 | 1.1 | 1.2 | IPF19775  | 10593296..unknown function                    | orf19.11758 | 19775 | IPF19775  | No significant S.c. match                                                                               |
| CA3066 | 2.4 | 1.5 | 1.6 | 1.1 | IPF15813  | 10595073..unknown function                    | orf19.4281  | 15813 | IPF15813  | TRANSCR molecular_function unknown                                                                      |
| CA3067 | 1.2 | 0.8 | 0.6 | 1.0 | IPF15811  | complemer unknown function                    | orf19.11756 | 15811 | IPF15811  | No significant S.c. match                                                                               |
| CA3068 | 1.0 | 0.9 | 1.2 | 1.0 | LIP2      | 10604170..Secretory lipase                    | orf19.4804  | 6120  | CaLIP2    | Other virulence attributes                                                                              |
| CA3069 | 1.2 | 1.0 | 0.9 | 1.3 | IPF6117   | 10606420..unknown function                    | orf19.4805  | 6117  | IPF6117   | UNCLASSIFIED molecular_function unknown                                                                 |
| CA3070 | 1.8 | 1.1 | 1.1 | 1.0 | PPA2      | 10609643..Mitochondrial inorganic             | orf19.4807  | 6114  | CaPPA2    | Phosphate hydrolase activity                                                                            |
| CA3071 | 0.5 | 0.8 | 0.9 | 1.0 | NUP188    | complemer Nucleoporin                         | orf19.4808  | 6113  | CaNUP188  | CELLULAF structural molecule activity                                                                   |
| CA3072 | 1.0 | 0.9 | 1.0 | 1.0 | ERG12     | 10616174..Mevalonate kinase (by               | orf19.4809  | 6109  | CaERG12   | Lipid fatty-εtransferase activity                                                                       |
| CA3073 | 1.7 | 1.2 | 1.2 | 1.0 | IPF6108   | complemer putative tricarboxylate             | orf19.4811  | 6108  | IPF6108   | TRANSPO molecular_function unknown                                                                      |
| CA3074 | 0.9 | 0.5 | 1.0 | 1.0 | IPF6106   | 10618742..similar to Bacillus halo            | orf19.4812  | 6106  | IPF6106   | No significant S.c. match                                                                               |
| CA3075 | 1.8 | 1.2 | 1.1 | 1.0 | IPF6105   | complemer similar to Saccharomy               | orf19.4813  | 6105  | IPF6105   | Nucleotide ligase activity                                                                              |
| CA3076 | 0.8 | 1.1 | 1.1 | 1.1 | IPF6101.3 | 10621306..unknown function, 3-pr              | orf19.4814  | 6101  | IPF6101.3 | No significant S.c. match                                                                               |
| CA3077 |     |     |     |     | YTM1      | 10622006..10623406                            |             |       |           |                                                                                                         |
| CA3078 | 0.9 | 0.9 | 0.9 | 1.1 | IPF19970  | complemer unknown function                    | orf19.4816  | 19970 | IPF19970  | UNCLASSIFIED molecular_function unknown                                                                 |
| CA3079 | 1.1 | 1.0 | 1.0 | 0.7 | RAM2      | 10625422..geranylgeranyltransfer              | orf19.4817  | 15519 | CaRAM2    | Lipid fatty-εtransferase activity                                                                       |
| CA3080 | 1.2 | 1.0 | 1.0 | 1.0 | IPF14634  | complemer APP-binding protein 1               | orf19.4153  | 14634 | IPF14634  | PROTEIN FATE [folding modification destination]                                                         |
| CA3081 | 1.2 | 0.8 | 1.0 | 1.1 | EFT3      | 10638188..translation elongation f            | orf19.11629 | 11638 | CaEFT3    | PROTEIN structural regulator activity                                                                   |

|        |     |     |     |     |            |                                                 |             |       |            |                                                                                         |
|--------|-----|-----|-----|-----|------------|-------------------------------------------------|-------------|-------|------------|-----------------------------------------------------------------------------------------|
| CA3082 |     | 0.9 | 1.1 | 0.9 | IPF11627   | 10644145..unknown function                      | orf19.11627 | 11627 | IPF11627   | No significant S.c. match                                                               |
| CA3083 | 1.1 | 0.9 | 1.1 | 1.1 | IPF11262   | 10644491..unknown function                      | orf19.11626 | 11626 | IPF11262   | Nucleotide molecular_function unknown                                                   |
| CA3084 | 0.2 | 0.4 | 0.6 | 0.9 | IPF11625   | 10645394..unknown function                      | orf19.4149  | 11625 | IPF11625   | No significant S.c. match                                                               |
| CA3085 |     | 1.1 | 1.5 | 1.3 | IPF17086   | 10647065..unknown function                      | orf19.4148  | 17086 | IPF17086   | No significant S.c. match                                                               |
| CA3086 | 0.9 | 1.1 | 0.9 | 0.9 | GLR1       | 10648979..by similarity to S. cerev             | orf19.11623 | 14902 | CaGLR1     | CELL RES transporter activity                                                           |
| CA3087 | 0.8 | 1.2 | 1.0 | 1.0 | SMD3       | complemer core snRNP protein (b                 | orf19.11622 | 14903 | CaSMD3     | TRANSCR RNA binding                                                                     |
| CA3088 | 1.9 | 1.3 | 1.2 | 1.1 | IPF9826    | 10652887..unknown function                      | orf19.11621 | 9826  | IPF9826    | TRANSCR transcription regulator activity                                                |
| CA3089 | 1.4 | 0.9 | 0.9 | 1.1 | IPF9825    | 10656457..unknown function                      |             | 9825  | IPF9825    | UNCLASSI molecular_function unknown                                                     |
| CA3090 | 1.0 | 0.9 | 0.9 | 1.1 | IPF18385   | complemer unknown function                      | orf19.11619 | 18385 | IPF18385   | UNCLASSI molecular_function unknown                                                     |
| CA3091 | 0.9 | 1.0 | 1.0 | 1.0 | IPF9821.5f | 10659481..unknown function, 5-pr                | orf19.11618 | 19600 | IPF9821.5f | TRANSPORT FACILITATION                                                                  |
| CA3092 | 0.4 | 1.0 | 0.9 | 1.1 | IPF9821.3f | 10660040..unknown function, 3-pr                | orf19.11617 | 9821  | IPF9821.3f | TRANSPO transporter activity                                                            |
| CA3093 | 1.3 | 1.0 | 0.9 | 0.7 | TOF1       | complemer Topoisomerase I interz                | orf19.11613 | 9818  | CaTOF1     | CELL CYC molecular_function unknown                                                     |
| CA3094 | 2.1 | 1.8 | 1.3 | 1.4 | IPF11548   | 10671694..serine/threonine protei               | orf19.11335 | 11548 | IPF11548   | CELL RES protein kinase activity                                                        |
| CA3095 | 0.6 | 0.8 | 1.0 | 1.1 | CDC28      | 10674380..CELL DIVISION CONT                    | orf19.3856  | 11549 | CaCDC28    | CELL CYC protein kinase activity                                                        |
| CA3096 | 1.3 | 1.0 | 1.1 | 0.8 | IPF11551   | 10675988..unknown function                      | orf19.3858  | 11551 | IPF11551   | UNCLASSIFIED PROTEINS                                                                   |
| CA3097 | 0.6 | 0.3 | 0.9 | 1.0 | IPF6600    | 10676828..unknown function                      | orf19.3859  | 6600  | IPF6600    | Lipid fatty-oxidoreductase activity                                                     |
| CA3098 | 0.7 | 1.2 | 1.2 | 0.9 | SIS1       | 10678451..heat shock protein (by                | orf19.3861  | 6598  | CaSIS1     | CELL CYC chaperone activity                                                             |
| CA3099 | 0.9 | 1.0 | 1.2 | 1.1 | LST8       | 10679824..required for transport                | orf19.3862  | 6595  | CaLST8     | CELLULAF protein binding                                                                |
| CA3100 | 1.1 | 1.0 | 1.1 | 1.3 | IPF6594    | complemer unknown function                      | orf19.3863  | 6594  | IPF6594    | TRANSCRIPTION SUBCELLULAR LOCALISATION                                                  |
| CA3101 | 0.7 | 1.1 | 1.1 | 0.9 | IPF6593    | complemer similar to Saccharomy                 | orf19.3865  | 6593  | IPF6593    | TRANSCR transcription regulator activity                                                |
| CA3102 | 1.1 | 1.0 |     | 1.1 | RLP7       | 10689617..ribosomal-like proteins               | orf19.3867  | 6586  | CaRLP7     | CLASSIFIC RNA binding                                                                   |
| CA3103 | 1.4 | 1.0 | 1.1 | 0.9 | IPF12086   | 10696183..unknown function                      | orf19.13908 | 12086 | IPF12086   | UNCLASSI molecular_function unknown                                                     |
| CA3104 | 1.2 | 1.5 | 1.4 | 1.1 | IPF12084   | 10697034..unknown function                      | orf19.13907 | 12084 | IPF12084   | UNCLASSI molecular_function unknown                                                     |
| CA3105 | 0.6 | 0.5 | 1.0 | 0.9 | IPF12083   | 10698135..unknown function                      | orf19.6553  | 12083 | IPF12083   | CELLULAR TRANSPORT AND TRANSPORT MECHANISMS SUBCELLULAR LOCALISATION                    |
| CA3106 | 0.6 | 1.0 | 0.8 | 1.0 | IPF11821   | 10699783..unknown function                      | orf19.6552  | 11821 | IPF11821   | SUBCELL oxidoreductase activity                                                         |
| CA3107 | 0.9 | 0.7 | 0.9 | 0.9 | GOS1       | complemer SNARE protein of Golc                 | orf19.6551  | 11824 | CaGOS1     | PROTEIN I transporter activity                                                          |
| CA3108 | 1.1 | 0.9 | 1.0 | 1.0 | IPF11826   | 10702398..unknown function                      | orf19.6550  | 11826 | IPF11826   | UNCLASSI molecular_function unknown                                                     |
| CA3109 | 1.8 | 2.2 | 2.4 | 1.0 | IPF11829   | complemer unknown function                      | orf19.6548  | 11829 | IPF11829   | Nitrogen ar molecular_function unknown                                                  |
| CA3110 | 1.3 | 1.8 | 1.2 | 1.0 | LPI9       | 10706896..Microtubule-associatec                | orf19.6544  | 15433 | CaLPI9     | CLASSIFIC molecular_function unknown                                                    |
| CA3111 | 0.6 | 0.4 | 0.7 | 0.7 | RPL5       | complemer ribosomal protein (by h               | orf19.6541  | 10601 | CaRPL5     | PROTEIN :RNA binding                                                                    |
| CA3112 | 1.1 | 1.2 | 1.0 | 1.2 | PFK2       | complemer 6-phosphofructokinase                 | orf19.6540  | 10598 | CaPFK2     | C-compou phosphorylase activity                                                         |
| CA3113 | 1.0 | 1.3 | 0.9 | 1.2 | IPF15737   | 10717001..similar to Saccharom                  | orf19.13892 | 15737 | IPF15737   | CELL CYC hydrolase activity                                                             |
| CA3114 | 0.8 | 1.0 | 1.1 | 0.9 | IPF18384   | 10719606..unknown function                      |             | 18384 | IPF18384   | No significant S.c. match                                                               |
| CA3115 | 0.5 | 0.4 | 0.2 | 1.0 | ECM33.3    | 10725212..cell wall biogenesis, 3-prime end (by |             | 5366  | CaECM33.3  | CELL CYC molecular_function unknown                                                     |
| CA3116 | 0.7 |     | 1.0 | 0.9 | LAB2       | complemer LIPOATE BIOSYNTHE                     | orf19.3010  | 5364  | CaLAB2     | Metabolism ligase activity                                                              |
| CA3117 | 1.2 | 1.0 | 1.1 | 1.1 | IPF5363    | 10727856..unknown function                      | orf19.3009  | 5363  | IPF5363    | UNCLASSI molecular_function unknown                                                     |
| CA3118 | 0.7 | 0.9 | 1.3 | 1.0 | COQ4       | 10730084..ubiquinone biosynthes                 | orf19.3008  | 5361  | CaCOQ4     | Metabolism molecular_function unknown                                                   |
| CA3119 | 1.4 | 1.2 | 0.8 | 0.7 | IPF5360.3  | 10731552..unknown function, 3-prime end         |             | 5360  | IPF5360.3  | UNCLASSIFIED PROTEINS                                                                   |
| CA3120 | 1.1 | 1.1 | 1.1 | 1.1 | IPF5358    | complemer unknown function                      | orf19.3007  | 5358  | IPF5358    | UNCLASSI molecular_function unknown                                                     |
| CA3121 | 1.3 | 0.9 | 1.0 | 0.9 | GGA1       | 10733426..Arf-binding protein                   | orf19.3006  | 5357  | CaGGA1     | CELLULAF molecular_function unknown                                                     |
| CA3122 | 1.0 | 1.2 | 1.3 | 1.0 | IPF5356    | complemer unknown function                      | orf19.3004  | 5356  | IPF5356    | UNCLASSI molecular_function unknown                                                     |
| CA3123 | 0.4 | 0.5 | 0.5 | 0.7 | RPL6.3     | complemer ribosomal protein, 3-prime end        |             | 5354  | CaRPL6.3   | PROTEIN :RNA binding                                                                    |
| CA3124 | 2.0 | 1.1 | 1.2 | 1.0 | IPF5353.3  | complemer unknown function, 3-pr                | orf19.3003  | 5353  | IPF5353.3  | UNCLASSI molecular_function unknown                                                     |
| CA3125 | 0.7 | 0.9 | 1.2 | 1.0 | IPF8921.5f | complemer unknown function, 5-prime end         |             | 8921  | IPF8921.5f | No significant S.c. match                                                               |
| CA3126 | 1.7 | 3.2 | 1.5 | 1.3 | GCN4       | complemer transcriptional activato              | orf19.1358  | 8919  | CaGCN4     | Amino acid DNA binding                                                                  |
| CA3127 | 0.8 | 0.9 | 0.9 | 1.1 | IPF8915    | complemer unknown function                      | orf19.1359  | 8915  | IPF8915    | UNCLASSI molecular_function unknown                                                     |
| CA3128 | 0.8 | 0.9 | 0.9 | 0.9 | IPF8914    | complemer unknown function                      | orf19.1360  | 8914  | IPF8914    | CELL CYC molecular_function unknown                                                     |
| CA3129 | 0.9 | 0.8 | 1.1 | 1.0 | OST4       | 10756389..oligosaccharyltransferase subunit     |             | 8912  | CaOST4     | No significant S.c. match                                                               |
| CA3130 | 0.8 | 1.0 | 0.9 | 0.9 | TIM23      | 10757192..mitochondrial inner me                | orf19.1361  | 8911  | CaTIM23    | PROTEIN I transporter activity                                                          |
| CA3131 | 0.9 | 1.0 | 1.0 | 0.9 | IPF8910    | complemer unknown function                      | orf19.1362  | 8910  | IPF8910    | CLASSIFICATION NOT YET CLEAR-CUT                                                        |
| CA3132 | 5.0 | 1.4 | 2.3 | 1.2 | IPF8904    | 10761903..unknown function                      | orf19.1363  | 8904  | IPF8904    | UNCLASSI molecular_function unknown                                                     |
| CA3133 | 0.7 | 1.0 | 1.0 | 1.0 | IPF16939   | complemer unknown function                      | orf19.1364  | 16939 | IPF16939   | UNCLASSIFIED PROTEINS                                                                   |
| CA3134 | 0.7 | 1.1 | 1.1 | 0.9 | IPF11499.F | 10765987..unknown function                      | orf19.1365  | 19972 | IPF11499.F | No significant S.c. match                                                               |
| CA3135 | 1.5 | 1.0 | 1.0 | 0.8 | IPF8990    | 10767918..unknown function                      | orf19.1366  | 8990  | IPF8990    | No significant S.c. match                                                               |
| CA3136 | 1.3 | 1.0 | 0.9 | 0.7 | IPF8989    | complemer unknown function                      | orf19.1367  | 8989  | IPF8989    | No signific molecular_function unknown                                                  |
| CA3137 | 1.3 | 1.1 | 0.9 | 0.8 | IPF8976    | 10779028..unknown function                      | orf19.8949  | 8976  | IPF8976    | No significant S.c. match                                                               |
| CA3138 | 1.1 | 0.8 | 0.6 | 1.1 | SAP2       | 10790905..aspartic protease                     | orf19.3708  | 9220  | CaSAP2     | PROTEIN FATE [folding modification destination] ""Other virulence attributes            |
| CA3139 | 0.7 | 1.1 | 1.2 | 1.2 | YHB3       | 10795143..flavo-hemoglobin (by h                | orf19.3710  | 9216  | CaYHB3     | CELL RESCUE DEFENSE AND VIRULENCE ""SUBCELLULAR LOCALISATION                            |
| CA3140 | 1.2 | 1.0 | 1.0 | 0.9 | IPF9214    | 10798230..unknown function                      | orf19.3711  | 9214  | IPF9214    | Metabolism of vitamins cofactors and prosthetic groups                                  |
| CA3141 | 3.1 | 1.8 | 2.9 | 1.3 | IPF9211.3f | complemer unknown function, 3-pr                | orf19.3712  | 9213  | IPF9211.3f | No significant S.c. match                                                               |
| CA3142 | 4.4 | 2.0 | 2.2 | 1.5 | IPF9211.5f | complemer unknown function, 3-pr                | orf19.3713  | 9211  | IPF9211.5f | No significant S.c. match                                                               |
| CA3143 | 1.0 | 0.9 | 1.2 | 0.9 | IPF8295    | 10805134..unknown function                      | orf19.3714  | 8295  | IPF8295    | No significant S.c. match                                                               |
| CA3144 | 1.1 | 0.9 | 0.9 | 0.9 | ASF1       | complemer anti-silencing protein (t             | orf19.3715  | 8293  | CaASF1     | TRANSCR protein binding                                                                 |
| CA3145 | 1.4 | 1.0 | 0.9 | 0.8 | CDC9       | complemer DNA ligase (by homolc                 | orf19.6155  | 9796  | CaCDC9     | CELL CYC ligase activity                                                                |
| CA3146 | 1.3 | 0.9 | 1.0 | 1.0 | IPF9797    | complemer unknown function                      | orf19.6156  | 9797  | IPF9797    | No signific molecular_function unknown                                                  |
| CA3147 | 1.4 | 1.1 | 1.2 | 1.2 | IPF9803    | complemer unknown function                      | orf19.6160  | 9803  | IPF9803    | UNCLASSI molecular_function unknown                                                     |
| CA3148 | 1.4 | 0.9 | 0.9 | 0.8 | IPF9808    | 10820281..similar to Saccharomy                 | orf19.6163  | 9808  | IPF9808    | CELL CYC DNA binding                                                                    |
| CA3149 | 0.9 | 0.8 | 0.9 | 0.9 | KGD1       | 10822581..2-oxoglutarate dehydr                 | orf19.6165  | 19778 | CaKGD1     | C-compou oxidoreductase activity                                                        |
| CA3150 | 1.5 | 1.0 | 1.1 | 0.9 | IPF4035    | complemer unknown function                      | orf19.6166  | 4035  | IPF4035    | Lipid fatty-acid and isoprenoid metabolism                                              |
| CA3151 | 0.5 | 1.1 | 1.0 | 1.3 | IPF4033    | complemer similar to Saccharomy                 | orf19.6167  | 4033  | IPF4033    | C-compou oxidoreductase activity                                                        |
| CA3152 | 0.9 | 1.4 | 1.0 | 1.2 | IPF4032    | 10830274..unknown function                      | orf19.6168  | 4032  | IPF4032    | CELL CYCLE AND DNA PROCESSING CONTROL OF CELLULAR ORGANIZATION SUBCELLULAR LOCALISATION |

|        |      |     |      |     |            |                                                             |                  |                                                                                     |
|--------|------|-----|------|-----|------------|-------------------------------------------------------------|------------------|-------------------------------------------------------------------------------------|
| CA3153 | 16.5 | 5.6 | 34.1 | 4.5 | FRP2       | 10834721..member of the FRP far orf19.6169                  | 4028 CaFRP2      | C-compound and carbohydrate metabolism                                              |
| CA3154 | 2.0  | 1.2 | 1.7  | 1.1 | FUN34.5E   | 10836621..unknown function, 5-prime end                     | 18376 CaFUN34.5E | C-compound and carbohydrate metabolism                                              |
| CA3156 | 1.0  | 1.2 | 0.9  | 1.0 | IPF14455   | 10837414..similar to Saccharomy orf19.1589                  | 14455 IPF14455   | TRANSCR transcription regulator activity                                            |
| CA3157 | 0.5  |     | 0.8  | 1.2 | IPF14456   | complemer unknown function orf19.1588                       | 14456 IPF14456   | UNCLASSI molecular_function unknown                                                 |
| CA3158 | 1.0  | 1.0 | 1.1  | 1.1 | IPF13131.5 | 10841576..unknown function, 3-pr orf19.1587                 | 13131 IPF13131.5 | C-compound and carbohydrate metabolism TRANSPORT FACILITATION                       |
| CA3159 | 1.5  | 1.0 |      | 0.8 | PLC3       | 10843487..phosphatidylinositol ph orf19.1586                | 13130 CaPLC3     | TRANSCRIPTION SUBCELLULAR LOCALISATION                                              |
| CA3160 | 1.4  | 3.7 | 2.2  | 3.2 | ZRT2       | complemer zinc transport protein ( orf19.1585               | 13128 CaZRT2     | REGULATI transporter activity                                                       |
| CA3161 | 1.4  | 1.3 | 1.2  | 0.9 | IPF13121.5 | complemer unknown function, 3-pr orf19.1584                 | 13121 IPF13121.5 | TRANSPORT FACILITATION                                                              |
| CA3162 | 1.4  | 1.1 | 1.1  | 0.8 | HOL5.3F    | complemer member of major facilit orf19.1583                | 13181 CaHOL5.3F  | CELL RESCUE DEFENSE AND VIRULENCE ""TRANSPORT FACILITATION                          |
| CA3163 | 1.1  | 1.2 |      | 1.1 | HOL5.5F    | complemer member of major facilit orf19.1582                | 13183 CaHOL5.5F  | CELL RESCUE DEFENSE AND VIRULENCE ""TRANSPORT FACILITATION                          |
| CA3164 | 1.0  | 1.1 | 1.0  | 0.9 | IPF13187   | 10852889..unknown function orf19.1580                       | 13187 IPF13187   | No significant S.c. match                                                           |
| CA3165 | 1.2  | 1.1 | 1.0  | 1.3 | FMI1       | complemer processing of pre-ribos orf19.1578                | 9638 CaFMI1      | TRANSCR RNA binding                                                                 |
| CA3166 | 1.4  | 1.0 | 1.1  | 0.8 | IPF9634    | complemer probable GATA zinc fir orf19.1577                 | 9634 IPF9634     | UNCLASSI DNA binding,transcription regulator activity                               |
| CA3167 | 1.2  | 1.3 | 1.4  | 1.0 | IPF9632    | complemer unknown function orf19.1576                       | 9632 IPF9632     | UNCLASSIFIED PROTEINS                                                               |
| CA3168 | 1.3  | 0.9 |      | 1.3 | PRS3       | complemer ribose-phosphate pyro orf19.1575                  | 9631 CaPRS3      | Amino acid transferase activity                                                     |
| CA3169 | 1.1  | 1.0 | 1.0  | 1.2 | IPF7686    | 10873121..putative mitochondrial orf19.1395                 | 7686 IPF7686     | Phosphate molecular_function unknown                                                |
| CA3170 | 1.4  | 1.0 | 1.1  | 0.7 | IPF7685    | complemer putative GTPase activ orf19.1396                  | 7685 IPF7685     | UNCLASSI enzyme regulator activity                                                  |
| CA3171 | 1.3  | 1.3 | 1.1  | 1.1 | IPF7681    | 10877654..unknown function orf19.1397                       | 7681 IPF7681     | Lipid fatty-acid and isoprenoid metabolism                                          |
| CA3172 | 0.8  | 1.0 | 1.2  | 1.2 | IPF7676    | 10879160..unknown function orf19.1400                       | 7679 IPF7676     | No significant S.c. match                                                           |
| CA3173 | 0.6  | 0.9 | 1.0  | 1.0 | IPF14145   | complemer unknown function orf19.1401                       | 14145 IPF14145   | No significant S.c. match                                                           |
| CA3174 | 0.6  | 0.8 | 0.9  | 1.2 | CCT2       | 10888438..chaperonin of the TCP orf19.1402                  | 11584 CaCCT2     | UNCLASSI chaperone activity                                                         |
| CA3175 | 0.7  | 1.1 | 1.0  | 1.0 | IPF11587   | 10890905..unknown function orf19.1403                       | 11587 IPF11587   | CELLULAF transporter activity                                                       |
| CA3176 | 0.8  | 1.0 | 1.0  | 1.0 | IPF11588   | complemer unknown function orf19.1404                       | 11588 IPF11588   | UNCLASSIFIED PROTEINS                                                               |
| CA3177 | 0.8  | 0.9 | 0.9  | 1.0 | IPF11589   | complemer similar to Saccharomy orf19.1405                  | 11589 IPF11589   | Phosphate metabolism SUBCELLULAR LOCALISATION                                       |
| CA3178 | 0.9  | 0.9 | 0.8  | 1.0 | IPF19974   | complemer unknown function orf19.1406                       | 19974 IPF19974   | CELL CYCLE AND DNA PROCESSING                                                       |
| CA3179 | 0.9  | 1.1 | 0.9  | 1.0 | YLF2       | 10901693..GTP-binding protein orf19.2128                    | 12246 CaYLF2     | UNCLASSI molecular_function unknown                                                 |
| CA3180 | 0.8  | 1.0 | 0.9  | 1.1 | IPF12244   | complemer unknown function orf19.2131                       | 12244 IPF12244   | UNCLASSI ligase activity                                                            |
| CA3181 | 0.9  | 0.9 | 0.7  | 0.8 | IPF12241   | complemer unknown function orf19.2132                       | 12241 IPF12241   | UNCLASSIFIED PROTEINS                                                               |
| CA3182 | 1.2  | 1.1 | 1.3  | 1.2 | LIP4       | 10908164..secretory lipase orf19.2133                       | 15657 CaLIP4     | Other virulence attributes                                                          |
| CA3183 | 1.9  | 1.3 | 1.1  | 1.0 | TSM1.3F    | complemer component of TFIID cc orf19.2135                  | 15656 CaTSM1.3F  | TRANSCR transcription regulator activity                                            |
| CA3184 | 1.3  | 1.2 | 1.0  | 0.9 | TSM1.5F    | complemer component of TFIID cc orf19.2136                  | 13636 CaTSM1.5F  | TRANSCRIPTION SUBCELLULAR LOCALISATION                                              |
| CA3185 | 1.1  | 0.8 | 0.9  | 0.8 | IPF13637   | complemer unknown function orf19.2137                       | 13637 IPF13637   | No significant S.c. match                                                           |
| CA3186 | 1.1  | 1.2 | 1.1  | 1.1 | ILS1       | 10915617..isoleucyl-tRNA synthet orf19.2138                 | 13644 CaILS1     | PROTEIN :ligase activity                                                            |
| CA3187 | 0.8  | 1.3 | 1.3  | 1.1 | IPF17094   | complemer unknown function orf19.2143                       | 17094 IPF17094   | UNCLASSI molecular_function unknown                                                 |
| CA3188 | 1.2  | 0.8 | 0.9  | 1.2 | IPF11610   | complemer similar to Saccharomy orf19.2146                  | 11610 IPF11610   | TRANSCR transferase activity                                                        |
| CA3189 | 1.5  | 1.1 | 1.0  | 1.0 | IPF11607   | complemer unknown function orf19.2149                       | 11607 IPF11607   | REGULATI molecular_function unknown                                                 |
| CA3190 | 0.6  | 0.6 | 1.4  | 1.3 | IPF11603   | 10926058..unknown function orf19.2150                       | 11603 IPF11603   | ENERGY t transporter activity                                                       |
| CA3191 | 1.5  | 2.7 | 2.0  | 1.0 | IPF11601   | 10927146..unknown function orf19.2151                       | 11601 IPF11601   | CLASSIFIC molecular_function unknown                                                |
| CA3192 | 1.2  | 1.2 | 1.0  | 0.9 | IPF11598   | 10929664..by homology to S. cerv orf19.2154                 | 11598 IPF11598   | C-compound and carbohydrate metabolism ENERGY SUBCELLULAR LOCALISATION              |
| CA3193 | 1.0  | 1.1 | 1.1  | 1.2 | IPF3418    | complemer unknown function orf19.6170                       | 3418 IPF3418     | CELL CYC protein binding                                                            |
| CA3194 | 0.7  | 1.2 | 1.0  | 1.0 | IPF3425    | complemer unknown function orf19.6171                       | 3423 IPF3425     | CELLULAF structural molecule activity                                               |
| CA3195 | 0.8  | 1.0 | 1.2  | 1.1 | IPF3426    | 10936551..unknown function orf19.6173                       | 3426 IPF3426     | C-compou enzyme regulator activity                                                  |
| CA3196 | 0.8  | 1.0 | 0.9  | 1.0 | IPF3428    | complemer unknown function orf19.6175                       | 3428 IPF3428     | UNCLASSI molecular_function unknown                                                 |
| CA3197 | 0.2  | 0.4 | 0.6  | 1.1 | SEC61      | complemer ER protein-translocatic orf19.6176                | 3431 CaSEC61     | PROTEIN t transporter activity                                                      |
| CA3198 | 0.4  | 1.0 | 1.0  | 0.9 | IPF3432    | 10939919..Unknown function orf19.6177                       | 3432 IPF3432     | No significant S.c. match                                                           |
| CA3199 | 1.0  | 1.0 | 1.2  | 1.4 | FBP1       | 10940393..Fructose-1,6-bisphosp orf19.6178                  | 3435 CaFBP1      | C-compou hydrolase activity                                                         |
| CA3200 | 0.5  | 1.0 | 0.9  | 1.0 | IPF3439    | 10941463..unknown function orf19.6180                       | 3439 IPF3439     | UNCLASSI transporter activity                                                       |
| CA3201 | 0.9  | 1.1 | 1.1  | 1.0 | IPF3444.3f | complemer unknown function, 3-pr orf19.6182                 | 3443 IPF3444.3f  | Lipid fatty-acid and isoprenoid metabolism ""TRANSCRIPTION SUBCELLULAR LOCALISATION |
| CA3202 | 1.0  | 0.9 | 0.8  | 1.1 | IPF3444.5f | complemer unknown function, 5-pr orf19.6184                 | 3444 IPF3444.5f  | No significant S.c. match                                                           |
| CA3203 | 1.0  | 0.9 | 1.0  | 0.9 | IPF3445    | 10945425..Unknown function orf19.6183                       | 3445 IPF3445     | PROTEIN t transporter activity                                                      |
| CA3204 | 0.7  | 1.0 | 1.1  | 1.0 | IPF3446    | complemer Unknown function orf19.6186                       | 3446 IPF3446     | UNCLASSIFIED PROTEINS                                                               |
| CA3205 | 1.2  | 1.0 | 0.9  | 1.1 | IPF3448    | 10946634..Unknown function orf19.6185                       | 3448 IPF3448     | No significant S.c. match                                                           |
| CA3206 | 1.0  | 0.9 | 0.8  | 1.1 | IPF3454    | 10947640..unknown function orf19.6187                       | 3454 IPF3454     | No significant S.c. match                                                           |
| CA3207 | 0.9  | 0.8 | 0.8  | 1.2 | IPF3456    | 10948707..unknown function orf19.6189                       | 3456 IPF3456     | UNCLASSI molecular_function unknown                                                 |
| CA3208 | 0.4  | 0.1 | 0.8  | 1.0 | PSA1       | complemer GDP-mannose pyroph orf19.6190                     | 3458 CaPSA1      | C-compou nucleotidyltransferase activity                                            |
| CA3209 | 0.5  | 1.0 | 0.7  | 0.9 | CTA2.5.3F  | complemer transcriptional activator, 3-prime enc orf19.6192 | 3460 CaCTA2.5.3F | No significant S.c. match                                                           |
| CA3211 | 0.6  | 1.0 | 1.1  | 1.1 | IPF19977   | complemer unknown function orf19.6192                       | 19977 IPF19977   | Lipid fatty-acid and isoprenoid metabolism ""SUBCELLULAR LOCALISATION               |
| CA3212 | 1.1  | 1.0 | 0.9  | 1.1 | MEF2       | 10966922..translation elongation f orf19.6208               | 8163 CaMEF2      | PROTEIN :translation regulator activity                                             |
| CA3213 | 0.9  | 1.0 | 1.1  | 0.9 | IPF8160    | 10969537..unknown function orf19.6205                       | 8160 IPF8160     | UNCLASSI molecular_function unknown                                                 |
| CA3214 | 1.3  | 1.4 | 1.1  | 1.5 | PUT3       | complemer putative positive activa orf19.6203               | 8158 CaPUT3      | Amino acid transcription regulator activity                                         |
| CA3215 | 1.3  | 1.0 | 1.0  | 0.8 | HCS1       | complemer putative DNA helicase orf19.6199                  | 13040 CaHCS1     | CELL CYC DNA binding,helicase activity                                              |
| CA3216 | 0.8  | 0.9 | 1.1  | 1.2 | IPF13038   | complemer unknown function orf19.6199                       | 13038 IPF13038   | No signific molecular_function unknown                                              |
| CA3217 | 1.4  | 0.9 | 1.0  | 1.0 | DHH1       | complemer RNA helicase by homc orf19.6197                   | 19979 CaDHH1     | TRANSCR protein binding                                                             |
| CA3218 | 1.4  | 1.2 | 1.0  | 0.8 | IPF10005   | 10989742..unknown function orf19.6196                       | 10005 IPF10005   | No significant S.c. match                                                           |
| CA3219 | 0.8  | 1.2 | 1.0  | 1.2 | IPF10003   | complemer similar to Saccharomy orf19.6195                  | 10003 IPF10003   | Nucleotide RNA binding,hydrolase activity                                           |
| CA3220 | 1.3  | 1.0 | 1.1  | 0.8 | IPF10001   | complemer unknown function orf19.6194                       | 10001 IPF10001   | No significant S.c. match                                                           |
| CA3221 | 1.6  | 1.0 | 0.9  | 0.9 | IPF10000.5 | 10994663..unknown function, 5-pr orf19.6193                 | 10000 IPF10000.5 | CELL CYC protein kinase activity                                                    |
| CA3222 | 0.7  | 1.1 | 1.0  | 0.9 | IPF15883   | complemer unknown function orf19.6283                       | 17135 IPF15883   | Nitrogen and sulphur metabolism REGULATION OF/INTERACTION WITH CELLULAR ENVIRONMENT |
| CA3223 | 1.7  | 0.9 | 0.9  | 0.7 | SRP102     | 10999078..Signal recognition part orf19.6284                | 17133 CaSRP102   | PROTEIN FATE [folding modification destination] ""SUBCELLULAR LOCALISATION          |
| CA3224 | 2.2  | 1.0 |      | 1.3 | GLC7       | complemer Ser/thr phosphoprotein orf19.6285                 | 18366 CaGLC7     | C-compou protein phosphatase activity                                               |
| CA3225 | 0.7  | 1.0 | 1.0  | 1.0 | IPF9329    | 11003785..unknown function orf19.6286                       | 9329 IPF9329     | UNCLASSI molecular_function unknown                                                 |

|        |     |     |     |     |           |                                                 |                 |                                                                                                    |
|--------|-----|-----|-----|-----|-----------|-------------------------------------------------|-----------------|----------------------------------------------------------------------------------------------------|
| CA3226 | 0.7 | 0.6 | 0.8 | 0.9 | RPS27     | 11005478..ribosomal protein S27 (by homology)   | 9327 CaRPS27    | PROTEIN structural molecule activity                                                               |
| CA3227 | 1.2 | 3.5 | 1.8 | 1.6 | AAT21     | complemer aspartate aminotransferase orf19.6287 | 9326 CaAAT21    | Amino acid transferase activity                                                                    |
| CA3228 | 0.8 | 1.0 | 0.9 | 0.8 | IPF9325   | 11007926..unknown function orf19.6288           | 9325 IPF9325    | No significant S.c. match                                                                          |
| CA3229 | 1.2 | 0.9 | 0.9 | 0.9 | FUN30     | complemer helicases of the Snf2/F orf19.6291    | 9324 CaFUN30    | CELL CYC molecular_function unknown                                                                |
| CA3230 | 0.4 | 0.8 | 0.8 | 0.8 | EMP24     | complemer component of the COP orf19.6293       | 9318 CaEMP24    | CELLULAF molecular_function unknown                                                                |
| CA3231 | 0.8 | 1.0 | 1.2 | 0.9 | IPF14348  | complemer unknown function, 3-prime end         | 14348 IPF14348  | No significant S.c. match                                                                          |
| CA3232 | 1.1 | 0.9 | 1.0 | 1.1 | IPF17727  | 11016729..unknown function, 3-prime end         | 14351 IPF17727  | No significant S.c. match                                                                          |
| CA3233 | 1.1 | 0.9 | 1.0 | 1.0 | MYO1      | 11018670..myosin-1 isoform (type orf19.6294     | 10851 CaMYO1    | CELL CYC motor activity                                                                            |
| CA3234 | 1.0 | 1.1 | 1.1 | 1.0 | MAS2      | complemer processing peptidase, orf19.6295      | 10850 CaMAS2    | PROTEIN lpeptidase activity                                                                        |
| CA3235 | 1.1 | 1.0 | 0.9 | 0.8 | SNF8      | 11027752..involved in glucose der orf19.6296    | 15696 CaSNF8    | C-compour molecular_function unknown                                                               |
| CA3236 | 0.9 | 1.1 | 1.0 | 1.2 | DEG1      | complemer pseudouridine synthas orf19.6297      | 15695 CaDEG1    | TRANSCR lyase activity                                                                             |
| CA3237 | 1.3 | 1.1 | 0.9 | 0.9 | SPB4      | 11030097..ATP-dependent RNA t orf19.6298        | 15694 CaSPB4    | TRANSCR RNA binding,helicase activity                                                              |
| CA3239 | 0.3 | 0.5 | 0.6 | 0.9 | IPF10558  | complemer unknown function                      | 10558 IPF10558  | PROTEIN SYNTHESIS ""PROTEIN FATE [folding modification destination] ""SUBCELLULAR LOCALISATION     |
| CA3240 | 1.1 | 1.0 | 1.0 | 1.2 | IPF10559  | 11038512..myosin-like protein (by orf19.4683    | 10559 IPF10559  | CELL CYC molecular_function unknown                                                                |
| CA3241 | 3.2 | 1.5 | 1.9 | 0.9 | IPF7493   | 11046547..putative permease (by orf19.4682      | 7493 IPF7493    | C-compound and carbohydrate metabolism CELLULAR TRANSPORT AND TRANSPORT MECHANISMS SUBCELLULAR LOI |
| CA3242 | 1.3 | 1.1 | 0.9 | 1.1 | RAT1      | 11048860..5 -3 Exoribonuclease orf19.4681       | 7491 CaRAT1     | TRANSCR RNA binding                                                                                |
| CA3243 | 1.0 | 1.2 | 1.0 | 0.8 | IPF7489   | complemer unknown function orf19.4680           | 7489 IPF7489    | No significant S.c. match                                                                          |
| CA3244 | 3.6 | 2.0 | 1.4 | 1.4 | AGP2      | complemer amino-acid permease orf19.4679        | 7487 CaAGP2     | Amino acid transporter activity                                                                    |
| CA3245 | 1.2 | 1.0 | 1.1 | 1.1 | IPF19980  | complemer putative lipase (by hom orf19.4678    | 19980 IPF19980  | Lipid fatty- $\alpha$ hydrolase activity                                                           |
| CA3246 | 1.5 | 1.4 | 1.3 | 1.1 | IPF15830  | complemer unknown function orf19.4677           | 15830 IPF15830  | UNCLASSI molecular_function unknown                                                                |
| CA3247 | 0.9 | 1.0 | 1.0 | 0.6 | IPF15832  | complemer unknown function orf19.4676           | 15832 IPF15832  | UNCLASSI molecular_function unknown                                                                |
| CA3248 | 0.9 | 0.8 | 0.9 | 0.9 | IPF15834  | 11060569..unknown function orf19.4675           | 15834 IPF15834  | No significant S.c. match                                                                          |
| CA3249 | 1.7 | 1.0 | 1.2 | 1.1 | GEF2      | 11068295..Putative voltage-gated orf19.11219    | 9175 CaGEF2     | CELLULAR TRANSPORT AND TRANSPORT MECHANISMS REGULATION OF/INTERACTION WITH CELLULAR ENVIRON        |
| CA3250 | 0.9 | 1.1 | 1.0 | 1.2 | IPF4716   | complemer unknown Function orf19.11220          | 4716 IPF4716    | Nucleotide metabolism CELL CYCLE AND DNA PROCESSING CELLULAR COMMUNICATION/SIGNAL TRANSDUCTION M   |
| CA3251 | 0.8 | 1.2 | 1.1 | 1.1 | IPF4721   | 11076782..unknown Function orf19.3737           | 4721 IPF4721    | UNCLASSIFIED PROTEINS                                                                              |
| CA3252 | 1.2 | 0.9 | 1.1 | 0.8 | IPF4722   | complemer unknown Function orf19.3738           | 4722 IPF4722    | No significant S.c. match                                                                          |
| CA3253 | 0.3 | 0.8 | 0.5 | 1.1 | IPF4724   | complemer unknown Function orf19.11225          | 4724 IPF4724    | No significant S.c. match                                                                          |
| CA3254 | 1.2 | 1.0 | 1.0 | 1.2 | IPF4728   | 11082297..unknown Function orf19.11227          | 4728 IPF4728    | CELL CYCLE AND DNA PROCESSING SUBCELLULAR LOCALISATION                                             |
| CA3255 | 0.8 | 1.1 | 1.0 | 1.1 | IPF4729   | 11083186..unknown Function orf19.3743           | 4729 IPF4729    | No significant S.c. match                                                                          |
| CA3256 | 0.9 | 1.0 | 1.0 | 1.0 | IPF4730   | 11084640..unknown Function orf19.11229          | 4730 IPF4730    | UNCLASSI molecular_function unknown                                                                |
| CA3257 | 2.2 | 1.5 | 1.3 | 1.8 | IFC1      | 11089056..unknown Function orf19.3746           | 4732 CaIFC1     | TRANSPORT FACILITATION                                                                             |
| CA3258 | 1.8 | 1.2 | 1.4 | 1.0 | IFC2      | 11095342..Unknown Function orf19.11233          | 4737 CaIFC2     | TRANSPORT FACILITATION                                                                             |
| CA3259 | 1.1 | 1.0 | 1.2 | 1.0 | IPF7970   | 11100373..unknown function orf19.10206          | 7970 IPF7970    | No significant S.c. match                                                                          |
| CA3260 | 1.2 | 1.2 | 1.0 | 1.3 | IPF7968   | 11101858..unknown function orf19.2693           | 7968 IPF7968    | Nitrogen and sulphur metabolism                                                                    |
| CA3261 | 0.8 | 1.0 | 1.0 | 0.9 | TYS1      | complemer tyrosyl-tRNA synthetas orf19.2694     | 5023 CaTYS1     | PROTEIN lligase activity                                                                           |
| CA3262 | 1.3 | 1.2 | 0.7 | 1.1 | UBR11.3   | 11104759..ubiquitin-protein ligase orf19.2695   | 5026 CaUBR11    | PROTEIN lligase activity                                                                           |
| CA3263 | 1.1 | 1.5 | 1.1 | 1.1 | UBR12     | complemer ubiquitin-protein ligase orf19.2697   | 19781 CaUBR12   | UNCLASSI lligase activity                                                                          |
| CA3264 | 0.9 | 1.1 | 1.1 | 1.0 | IPF5035   | 11116385..unknown function orf19.2698           | 5035 IPF5035    | UNCLASSI molecular_function unknown                                                                |
| CA3265 | 0.7 | 1.1 | 1.0 | 1.0 | ABP1      | complemer actin-binding protein (t orf19.2699   | 5041 CaABP1     | CELL FAT lprotein binding                                                                          |
| CA3266 | 1.3 | 1.0 | 1.0 | 1.0 | IPF5045   | complemer unknown function orf19.2703           | 5045 IPF5045    | UNCLASSI molecular_function unknown                                                                |
| CA3267 | 0.7 | 1.3 | 1.0 | 1.1 | RPS620A   | complemer unknown function orf19.6300           | 20129 RPS620a   | No significant S.c. match                                                                          |
| CA3268 | 0.7 | 1.4 | 1.0 | 1.1 | RPS620B   | complemer unknown function orf19.6301           | 19981 RPS620b   | No significant S.c. match                                                                          |
| CA3269 | 0.8 | 1.0 | 1.0 | 1.0 | IPF12221  | 11134151..unknown function orf19.6302           | 12221 IPF12221  | No significant S.c. match                                                                          |
| CA3270 | 0.8 | 1.1 | 0.9 | 0.8 | LYS5      | complemer L-aminoadipate-semial orf19.6304      | 12222 CaLYS5    | Amino acid transferase activity                                                                    |
| CA3271 | 1.0 | 1.0 | 1.1 | 1.1 | GLY2      | complemer L-threonine aldolase, l orf19.6305    | 12223 CaGLY2    | Amino acid lyase activity                                                                          |
| CA3272 | 0.9 | 1.0 | 1.1 | 1.0 | ALD4      | 11138987..aldehyde dehydrogena orf19.6306       | 12224 CaALD4    | CLASSIFICATION NOT YET CLEAR-CUT                                                                   |
| CA3273 | 1.3 | 1.0 | 1.0 | 1.1 | IPF12227  | 11141508..unknown function, 5-pr orf19.6307     | 19982 IPF12227  | TRANSCRIPTION SUBCELLULAR LOCALISATION                                                             |
| CA3274 | 0.9 | 1.0 | 1.0 | 1.0 | IPF12227  | 11142865..unknown function, 3-pr orf19.6308     | 12227 IPF12227  | No significant S.c. match                                                                          |
| CA3275 | 0.7 | 1.0 | 2.3 | 1.2 | IPF17068  | 11144794..unknown function orf19.6309           | 17068 IPF17068  | No significant S.c. match                                                                          |
| CA3276 | 1.0 | 0.8 | 1.0 | 1.1 | IPF6263   | 11148141..unknown function orf19.6310           | 6263 IPF6263    | No significant S.c. match                                                                          |
| CA3277 | 2.4 | 1.6 | 1.3 | 1.0 | IPF6266   | complemer unknown function orf19.6311           | 6266 IPF6266    | No significant S.c. match                                                                          |
| CA3278 | 0.3 | 0.5 | 0.8 | 0.8 | RPS3      | complemer Ribosomal protein S3, orf19.6312      | 6267 CaRPS3     | PROTEIN structural molecule activity                                                               |
| CA3279 | 1.4 | 1.0 | 1.0 | 0.8 | IPF6268   | complemer unknown function orf19.6313           | 6268 IPF6268    | C-compound and carbohydrate metabolism ""PROTEIN FATE [folding modification destination] ""        |
| CA3280 | 0.6 | 0.7 | 1.0 | 0.8 | IPF6269   | 3 complemer unknown function, 3-prime end       | 6269 IPF6269.3  | No significant S.c. match                                                                          |
| CA3281 | 0.9 | 0.9 | 1.1 | 0.9 | RPB8      | complemer DNA-directed RNA pol orf19.6314       | 6271 CaRPB8     | TRANSCR nucleotidyltransferase activity                                                            |
| CA3282 | 1.2 | 1.1 | 0.8 | 0.8 | IPF6272   | 11159454..unknown function orf19.6315           | 6272 IPF6272    | No significant S.c. match                                                                          |
| CA3283 | 0.8 | 1.1 | 1.2 | 1.1 | IPF6274   | 11160497..unknown function orf19.6316           | 6274 IPF6274    | UNCLASSI molecular_function unknown                                                                |
| CA3284 | 1.4 | 1.0 | 1.0 | 0.8 | ADE6      | 11163386..5 -phosphoribosylform; orf19.6317     | 6279 CaADE6     | Nucleotide ligase activity                                                                         |
| CA3285 | 0.7 | 0.8 | 0.9 | 0.9 | IPF6280   | complemer unknown function orf19.6318           | 6280 IPF6280    | UNCLASSI molecular_function unknown                                                                |
| CA3286 | 1.3 | 1.0 | 1.1 | 1.2 | UBP3.3EO  | 11169385..Ubiquitin-specific prote orf19.6319   | 14298 CaUBP3.3  | TRANSCR peptidase activity                                                                         |
| CA3287 | 0.8 | 0.9 | 1.2 | 1.0 | IPF14295  | complemer putative Sed1p-like cel orf19.6321    | 14295 IPF14295  | No significant S.c. match                                                                          |
| CA3288 | 1.0 | 1.0 | 1.2 | 1.2 | ARD8      | complemer D-arabinitol dehydroge orf19.6322     | 14294 CaARD8    | ENERGY SUBCELLULAR LOCALISATION                                                                    |
| CA3289 | 1.2 | 1.0 | 0.9 | 1.1 | HPA3      | 11173021..histone and other prote orf19.6323    | 14291 CaHPA3    | CELL CYC transferase activity                                                                      |
| CA3290 | 1.2 | 1.4 | 1.0 | 1.2 | IPF5734   | 11173579..unknown function orf19.6324           | 5734 IPF5734    | UNCLASSI molecular_function unknown                                                                |
| CA3291 | 1.0 | 0.9 | 0.9 | 1.0 | IPF5730   | complemer unknown function                      | 5730 IPF5730    | UNCLASSI molecular_function unknown                                                                |
| CA3292 | 1.1 | 0.9 | 1.0 | 1.3 | IPF5729   | 11176175..unknown function orf19.6326           | 5729 IPF5729    | No significant S.c. match                                                                          |
| CA3293 | 0.2 | 0.6 | 0.8 | 0.9 | IPF5726   | 11177065..unknown function orf19.6327           | 5726 IPF5726    | No significant S.c. match                                                                          |
| CA3294 | 1.0 | 0.8 | 0.9 | 0.9 | IPF5725   | complemer unknown function orf19.6328           | 5725 IPF5725    | UNCLASSI molecular_function unknown                                                                |
| CA3295 | 2.1 | 1.2 | 1.3 | 1.1 | IPF5723.E | 11178263..cell surface GPI-ancho orf19.6329     | 5723 IPF5723.ex | No significant S.c. match                                                                          |
| CA3296 | 1.1 | 1.1 | 1.3 | 1.1 | IPF5723.E | 11179639..cell surface GPI-ancho orf19.6336     | 5720 IPF5723.ex | No significant S.c. match                                                                          |
| CA3299 | 0.8 | 1.2 | 0.9 | 1.1 | IPF13777  | complemer unknown function orf19.2317           | 13777 IPF13777  | No significant S.c. match                                                                          |

|        |     |     |     |     |            |                                                 |               |                 |                                                                                                  |
|--------|-----|-----|-----|-----|------------|-------------------------------------------------|---------------|-----------------|--------------------------------------------------------------------------------------------------|
| CA3300 | 0.7 | 1.4 | 0.8 | 1.3 | RTG3       | complemer Probable bHLH/zip tra                 | orf19.2315    | 13780 CaRTG3    | C-compour transcription regulator activity                                                       |
| CA3301 | 1.8 | 1.4 | 1.3 | 0.9 | IPF13782   | complemer unknown function                      | orf19.2314    | 13782 IPF13782  | CONTROL molecular_function unknown                                                               |
| CA3302 | 0.9 | 1.1 | 1.3 | 1.0 | IPF13784   | complemer unknown function                      | orf19.2313    | 13784 IPF13784  | UNCLASSIFIED PROTEINS                                                                            |
| CA3303 | 0.8 | 1.1 | 0.9 | 0.9 | FRE42      | 11198079..ferric reductase (by ho               | orf19.2312    | 15397 CaFRE42   | REGULATION OF/INTERACTION WITH CELLULAR ENVIRONMENT Other virulence attributes                   |
| CA3304 | 0.6 | 0.6 | 1.0 | 1.1 | RPL82      | 11200750..60S ribosomal protein                 | orf19.2311    | 11736 CaRPL82   | PROTEIN SYNTHESIS SUBCELLULAR LOCALISATION                                                       |
| CA3305 | 0.3 | 0.4 | 0.8 | 0.9 | RPL29      | 11202094..ribosomal protein, cytosolic          | (by homc      | 11737 CaRPL29   | No signific structural molecule activity                                                         |
| CA3306 | 0.6 | 0.9 | 1.3 | 1.0 | IPF11738   | 11202754..unknown function                      | orf19.2310    | 11738 IPF11738  | PROTEIN :molecular_function unknown                                                              |
| CA3307 | 0.4 | 0.4 | 0.4 | 0.6 | RPL2.3     | complemer ribosomal protein L8, 3-prime end     | (l            | 11739 CaRPL2.3  | PROTEIN :structural molecule activity                                                            |
| CA3308 | 1.1 | 0.9 | 1.0 | 1.0 | PET127     | 11206167..component of mitochor                 | orf19.9845    | 11742 CaPET127  | PROTEIN :molecular_function unknown                                                              |
| CA3309 | 0.8 | 0.9 | 0.9 | 1.0 | IPF8806    | 11210004..6-phosphofructose-2-k                 | orf19.9844    | 8806 IPF8806    | C-compound and carbohydrate metabolism SUBCELLULAR LOCALISATION                                  |
| CA3310 | 1.2 | 0.9 | 0.9 | 0.8 | PFS2       | complemer Polyadenylation Factor                | orf19.2307    | 8808 CaPFS2     | TRANSCR RNA binding                                                                              |
| CA3311 | 0.8 | 1.1 | 1.2 | 1.1 | IPF8809    | 11213581..unknown function                      | orf19.2306    | 8809 IPF8809    | UNCLASSI molecular_function unknown                                                              |
| CA3312 | 1.2 | 1.0 | 0.9 | 0.8 | IPF8810    | complemer unknown function                      | orf19.2305    | 8810 IPF8810    | PROTEIN I protein binding                                                                        |
| CA3313 | 0.6 | 0.9 | 0.9 | 1.2 | IPF8811    | complemer unknown function                      | orf19.2304    | 8811 IPF8811    | UNCLASSIFIED PROTEINS                                                                            |
| CA3314 | 1.2 | 0.9 | 0.9 | 1.1 | IPF8812    | 11216686..unknown function                      | orf19.2303    | 8812 IPF8812    | TRANSCR RNA binding                                                                              |
| CA3315 | 1.0 | 0.8 | 0.9 | 0.9 | IPF8814    | 11217693..unknown function                      | orf19.2302    | 8814 IPF8814    | No significant S.c. match                                                                        |
| CA3316 | 1.3 | 1.2 | 1.0 | 0.9 | IPF8817    | 11219488..putative proteasome st                | orf19.2301    | 8817 IPF8817    | UNCLASSI molecular_function unknown                                                              |
| CA3317 | 1.0 | 1.0 | 1.2 | 1.0 | URM1       | complemer ubiquitin like protein                | (b orf19.2299 | 8818 CaURM1     | PROTEIN FATE [folding modification destination]                                                  |
| CA3318 | 0.5 | 0.8 | 0.7 | 0.9 | WBP1       | 11221040..Oligosaccharyl transfei               | orf19.2298    | 8820 CaWBP1     | C-compour transferase activity                                                                   |
| CA3319 | 1.6 | 1.2 | 1.1 | 1.1 | DRS25.3E1  | 11223914..Probable ATPase, 3-p                  | orf19.2680    | 6900 CaDRS25.   | TRANSPO transporter activity                                                                     |
| CA3320 | 1.2 | 0.9 | 0.9 | 0.9 | IPF6898    | complemer similar to Saccharomy                 | orf19.2678    | 6898 IPF6898    | CELL CYC protein binding,protein kinase activity                                                 |
| CA3321 | 1.1 | 0.9 | 1.2 | 1.1 | IPF6896.5f | 11231331..unknown function, 5-pr                | orf19.2677    | 6896 IPF6896.5f | ENERGY hydrolase activity                                                                        |
| CA3322 | 1.1 | 0.9 | 0.8 | 1.1 | IPF6895.3f | 11232939..unknown function, 3-prime end         |               | 6895 IPF6895.3f | ENERGY                                                                                           |
| CA3323 | 1.6 | 1.4 | 1.0 | 0.8 | IKI1       | complemer killer toxin insensitive              | orf19.2676    | 6894 CaIKI1     | CLASSIFICtranscription regulator activity                                                        |
| CA3324 | 1.5 | 1.0 | 1.0 | 0.9 | IPF6893    | 11234357..unknown function                      | orf19.2675    | 6893 IPF6893    | TRANSCR RNA binding                                                                              |
| CA3325 | 0.7 | 1.0 | 0.9 | 1.0 | IPF6890    | complemer unknown function                      | orf19.2674    | 6890 IPF6890    | No significant S.c. match                                                                        |
| CA3326 | 1.0 | 0.8 | 0.9 | 0.9 | IPF6889    | 11239385..unknown function                      | orf19.2673    | 6889 IPF6889    | UNCLASSI molecular_function unknown                                                              |
| CA3327 | 1.3 | 0.7 | 0.8 | 1.0 | NCP1       | 11242005..NADPH-cytochrome P                    | orf19.2672    | 10561 CaNCP1    | Lipid fatty-t transporter activity                                                               |
| CA3328 | 1.1 | 1.0 | 1.2 | 1.1 | IPF10564   | 11245061..unknown function                      | orf19.2671    | 10564 IPF10564  | UNCLASSIFIED PROTEINS                                                                            |
| CA3329 | 1.0 | 0.8 | 1.0 | 1.0 | IPF12162   | complemer Unknown function                      | orf19.2670    | 12162 IPF12162  | UNCLASSI molecular_function unknown                                                              |
| CA3330 | 0.9 | 1.0 | 1.0 | 0.9 | POL21.3    | complemer pol polyprotein, revers               | orf19.2669    | 12161 CaPOL21.3 | No significant S.c. match                                                                        |
| CA3331 | 0.9 | 1.0 | 1.1 | 1.1 | POL.3      | complemer Pol part of pCal retrotransposon      |               | 12159 CaPOL.3   | No significant S.c. match                                                                        |
| CA3332 | 0.9 | 1.1 | 0.9 | 0.9 | GAG        | complemer GAG protein of pCal re                | orf19.2668    | 12158 CaGAG     | No significant S.c. match                                                                        |
| CA3333 | 0.9 | 0.7 | 1.0 | 0.9 | CDC48      | 11256925..microsomal ATPase                     | (b orf19.9876 | 8680 CaCDC48    | CELL CYC hydrolase activity                                                                      |
| CA3334 | 1.1 | 0.8 | 0.8 | 0.9 | ALP1       | complemer amino-acid permease                   | orf19.2337    | 8681 CaALP1     | Amino acid metabolism CELLULAR TRANSPORT AND TRANSPORT MECHANISMS SUBCELLULAR LOCALISATION TRAN  |
| CA3335 | 1.2 | 1.0 | 1.0 | 0.7 | IPF8682    | 11262451..unknown function                      | orf19.2336    | 8682 IPF8682    | CELL FATE                                                                                        |
| CA3336 | 0.7 | 0.9 | 1.0 | 1.0 | IPF19983   | complemer unknown function                      | orf19.2335    | 19983 IPF19983  | PROTEIN I molecular_function unknown                                                             |
| CA3337 | 1.0 | 0.9 | 1.2 | 1.0 | IPF13583   | 11264759..unknown function                      | orf19.2334    | 13583 IPF13583  | C-compour molecular_function unknown                                                             |
| CA3338 | 1.0 | 1.3 | 0.8 | 1.0 | IPF13582   | complemer unknown function                      | orf19.2333    | 13582 IPF13582  | UNCLASSI molecular_function unknown                                                              |
| CA3339 | 1.0 | 1.0 | 1.1 | 0.9 | IPF20131   | 11269757..unknown function                      | orf19.2332    | 20131 IPF20131  | CONTROL molecular_function unknown                                                               |
| CA3340 | 1.0 | 1.0 | 1.0 | 1.0 | ADA2       | complemer general transcriptional               | orf19.2331    | 15288 CaADA2    | TRANSCR transcription regulator activity                                                         |
| CA3341 | 0.4 | 0.6 | 0.7 | 0.9 | RPS17.3    | 11273133..Ribosomal protein S17, 3-prime end    |               | 15290 CaRPS17.3 | PROTEIN :structural molecule activity                                                            |
| CA3342 | 1.0 | 1.0 | 0.9 | 1.1 | IPF13361   | 11274016..unknown function                      | orf19.2330    | 13361 IPF13361  | UNCLASSIRNA binding                                                                              |
| CA3343 | 0.7 | 1.2 | 0.9 | 1.0 | IPF13360   | complemer unknown function                      | orf19.2328    | 13360 IPF13360  | No significant S.c. match                                                                        |
| CA3344 | 1.2 | 1.1 | 0.8 | 1.0 | IPF13359   | complemer unknown function                      | orf19.2326    | 13359 IPF13359  | CELL CYC molecular_function unknown                                                              |
| CA3345 | 0.8 | 1.1 | 1.0 | 1.0 | IPF13357   | 11278824..unknown function                      | orf19.2325    | 13357 IPF13357  | TRANSCR transcription regulator activity                                                         |
| CA3346 | 1.1 | 1.1 | 0.8 | 1.2 | IPF13356   | complemer molybdopterin biosyntf                | orf19.2324    | 13356 IPF13356  | Metabolism of vitamins cofactors and prosthetic groups                                           |
| CA3347 | 0.6 | 0.8 | 0.9 | 1.2 | ERP5       | complemer protein involved in membrane trafficl |               | 15563 CaERP5    | PROTEIN I molecular_function unknown                                                             |
| CA3348 | 1.0 | 0.8 | 0.9 | 0.9 | RIO1       | complemer unknown function                      | orf19.2320    | 15559 CaRIO1    | UNCLASSI protein kinase activity                                                                 |
| CA3349 | 1.2 | 1.0 | 0.8 | 0.8 | IPF19588   | 11284820..unknown function                      |               | 19588 IPF19588  | UNCLASSI molecular_function unknown                                                              |
| CA3350 | 1.0 | 1.0 | 1.0 | 0.8 | RPL18A.5   | complemer ribosomal protein S18.e, 5-prime en   |               | 18348 CaRPL18A  | PROTEIN SYNTHESIS SUBCELLULAR LOCALISATION                                                       |
| CA3351 | 1.8 | 1.0 | 1.0 | 0.9 | IPF18347   | 11287619..unknown function                      | orf19.9503    | 18347 IPF18347  | No significant S.c. match                                                                        |
| CA3352 | 1.1 | 0.7 | 1.0 | 1.0 | IPF16194   | complemer unknown function                      | orf19.9501    | 16195 IPF16194  | CLASSIFIC molecular_function unknown                                                             |
| CA3353 | 1.6 | 0.8 | 1.0 | 0.9 | AUR1       | 11290569..aureobasidin-resistanc                | orf19.9500    | 11286 CaAUR1    | lipid fatty-t transferase activity                                                               |
| CA3354 | 1.2 | 1.1 | 1.2 | 0.9 | IPF11281   | 11294397..similar to Saccharomy                 | orf19.9499    | 11281 IPF11281  | CELLULAF signal transducer activity                                                              |
| CA3355 | 0.9 | 0.9 | 1.2 | 1.0 | IPF11277   | 11297435..unknown function                      | orf19.9498    | 11277 IPF11277  | Nucleotide metabolism CELL CYCLE AND DNA PROCESSING CELLULAR COMMUNICATION/SIGNAL TRANSDUCTION M |
| CA3356 | 1.4 | 0.8 | 1.0 | 0.9 | IPF9560    | 11300320..unknown function                      | orf19.9497    | 9560 IPF9560    | CELL RESCUE DEFENSE AND VIRULENCE ""TRANSPORT FACILITATION                                       |
| CA3357 | 0.6 | 0.9 | 0.9 | 1.1 | IPF9562    | complemer similar to Saccharomy                 | orf19.1941    | 9562 IPF9562    | CELL CYC structural molecule activity                                                            |
| CA3358 | 0.6 | 0.9 | 0.8 | 0.9 | IPF19984   | complemer similar to Saccharomy                 | orf19.1940    | 19984 IPF19984  | C-compour molecular_function unknown                                                             |
| CA3359 | 1.2 | 1.2 | 1.3 | 1.0 | IPF9566    | complemer unknown function                      | orf19.1939    | 9566 IPF9566    | UNCLASSI molecular_function unknown                                                              |
| CA3360 | 1.5 | 1.1 | 1.0 | 0.8 | IPF9568    | 11307329..unknown function                      | orf19.9493    | 9568 IPF9568    | No significant S.c. match                                                                        |
| CA3361 | 1.1 | 1.0 | 1.0 | 0.9 | SNF1       | 11308238..serine/threonine protei               | orf19.9491    | 9571 CaSNF1     | C-compour protein kinase activity                                                                |
| CA3362 | 0.8 | 1.2 | 1.1 | 1.1 | IPF9789    | 11313145..unknown function                      | orf19.9489    | 9789 IPF9789    | UNCLASSI molecular_function unknown                                                              |
| CA3363 | 1.4 | 1.1 | 0.9 | 0.8 | FRE32      | 11316949..ferric reductase (by ho               | orf19.9488    | 9791 CaFRE32    | REGULATI oxidoreductase activity                                                                 |
| CA3365 | 0.9 | 0.9 | 0.9 | 1.0 | ALG6       | 11322070..glucosyltransferase (b)               | orf19.1843    | 4661 CaALG6     | C-compour transferase activity                                                                   |
| CA3366 | 1.0 | 1.0 | 1.1 | 1.1 | FRE43      | 11332963..ferric reductase-like (b)             | orf19.9403    | 4664 CaFRE43    | REGULATION OF/INTERACTION WITH CELLULAR ENVIRONMENT Other virulence attributes                   |
| CA3367 | 1.9 | 1.2 | 1.3 | 1.0 | IPF4667    | 11336168..unknown Function                      | orf19.9405    | 4667 IPF4667    | C-compour lyase activity                                                                         |
| CA3368 | 1.2 | 1.2 | 1.2 | 1.0 | IPF4671    | complemer unknown Function                      | orf19.1849    | 4671 IPF4671    | UNCLASSI molecular_function unknown                                                              |
| CA3369 | 1.2 | 1.1 | 1.1 | 0.7 | IPF4672    | 11341348..unknown Function                      | orf19.1850    | 4672 IPF4672    | UNCLASSI protein phosphatase activity                                                            |
| CA3370 | 1.1 | 1.0 | 1.3 | 1.1 | IPF4674    | complemer unknown Function                      | orf19.1852    | 4674 IPF4674    | UNCLASSI molecular_function unknown                                                              |
| CA3372 | 0.1 | 0.2 | 0.3 | 0.9 | HHF22      | complemer histone H4 (by homolo                 | orf19.1854    | 4677 CaHHF22    | TRANSCRIPTION SUBCELLULAR LOCALISATION                                                           |

|        |     |     |     |     |           |                                                |                 |                                                                                                              |
|--------|-----|-----|-----|-----|-----------|------------------------------------------------|-----------------|--------------------------------------------------------------------------------------------------------------|
| CA3373 | 1.5 | 1.0 | 1.0 | 0.8 | SEO1      | 11346465..suppressor of sulfoxyd orf19.1855    | 19985 CaSEO1    | TRANSPORT FACILITATION                                                                                       |
| CA3374 | 0.9 | 1.2 | 0.9 | 1.1 | IPF4683   | complemer unknown function orf19.1856          | 4683 IPF4683    | TRANSCR protein binding                                                                                      |
| CA3375 | 0.9 | 1.1 | 1.1 | 1.0 | IPF4684   | 11351101..unknown function orf19.1857          | 4684 IPF4684    | TRANSCRIPTION SUBCELLULAR LOCALISATION                                                                       |
| CA3376 | 0.9 | 0.6 | 0.7 | 0.9 | LSC2.3EO1 | 11353073..succinate-CoA ligase beta subunit, c | 4686 CaLSC2.3e  | C-compound and carbohydrate metabolism ENERGY                                                                |
| CA3377 | 1.1 | 1.1 | 1.3 | 1.1 | CLF1      | 11357226..pre-mRNA splicing fac orf19.7964     | 8347 CaCLF1     | CELL CYC molecular_function unknown                                                                          |
| CA3378 | 1.1 | 0.7 | 0.9 | 0.9 | RUB1      | complemer ubiquitin-like protein (by homology) | 8348 CaRUB1     | PROTEIN SYNTHESIS ""PROTEIN FATE [folding modification destination] """"CELL RESCUE DEFENSE AND VIRULENCE "" |
| CA3379 | 0.6 | 1.1 | 0.8 | 1.0 | IPF8350   | 11360004..putative methyltransferase orf19.331 | 8350 IPF8350    | PROTEIN ttransferase activity                                                                                |
| CA3380 | 0.9 | 1.2 | 1.0 | 1.0 | MSL5      | 11360855..branch point bridging p orf19.329    | 8351 CaMSL5     | TRANSCR RNA binding                                                                                          |
| CA3381 | 1.7 | 1.2 | 1.5 | 1.1 | NPR2      | 11362697..nitrogen permease reg orf19.328      | 8357 CaNPR2     | Nitrogen ar molecular_function unknown                                                                       |
| CA3382 | 0.5 | 1.0 | 0.7 | 1.1 | HTA3      | 11364932..histone H2A F/Z variar orf19.327     | 8358 CaHTA3     | SUBCELLLLDNA binding                                                                                         |
| CA3383 | 1.0 | 0.9 | 1.0 | 1.0 | IPF8359   | complemer unknown function orf19.326           | 8359 IPF8359    | No significant S.c. match                                                                                    |
| CA3384 | 1.2 | 1.0 | 1.1 | 1.1 | IPF8362   | complemer similar to Saccharomy orf19.325      | 8362 IPF8362    | TRANSCR RNA binding                                                                                          |
| CA3385 | 2.0 | 1.2 | 1.2 | 1.2 | DRS23     | complemer Membrane-spanning Corf19.7955        | 6764 CaDRS23    | TRANSPORT FACILITATION                                                                                       |
| CA3386 | 1.1 | 1.0 | 1.0 | 0.9 | IPF6758   | 11374192..unknown function orf19.7954          | 6758 IPF6758    | No significant S.c. match                                                                                    |
| CA3387 | 0.7 | 1.1 | 1.0 | 0.9 | MUP3      | 11376288..Very low affinity methic orf19.7953  | 6757 CaMUP3     | Amino acid transporter activity                                                                              |
| CA3388 | 1.1 | 1.0 | 0.9 | 0.9 | IPF6755   | complemer unknown function orf19.320           | 6755 IPF6755    | CLASSIFICATION NOT YET CLEAR-CUT                                                                             |
| CA3389 | 0.7 | 1.0 | 1.0 | 0.9 | IPF6754   | 11380356..unknown function orf19.7951          | 6754 IPF6754    | UNCLASSImolecular_function unknown                                                                           |
| CA3390 | 0.8 | 0.9 | 1.1 | 0.9 | CAF17     | 11381000..Component of CCR4 transcriptional    | 6752 CaCAF17    | TRANSCR molecular_function unknown                                                                           |
| CA3391 | 0.6 | 0.8 | 0.9 | 0.9 | PNP1      | 11382811..Purine Nucleoside Phc orf19.7949     | 6750 CaPNP1     | Nucleotide transferase activity                                                                              |
| CA3392 | 0.7 | 0.9 | 0.8 | 0.9 | SEC13     | complemer Protein transport prote orf19.316    | 6749 CaSEC13    | CELLLULAFmolecular_function unknown                                                                          |
| CA3393 | 1.0 | 1.1 | 1.0 | 1.0 | IPF6748   | 11385023..unknown function orf19.315           | 6748 IPF6748    | CELL CYC molecular_function unknown                                                                          |
| CA3394 | 0.7 | 0.9 | 1.1 | 1.1 | IPF6747   | complemer similar to Saccharomy orf19.7946     | 6747 IPF6747    | TRANSCR transcription regulator activity                                                                     |
| CA3395 | 0.9 | 1.1 | 1.0 | 1.0 | IPF13616  | complemer unknown function orf19.3970          | 13616 IPF13616  | UNCLASSImolecular_function unknown                                                                           |
| CA3396 | 1.0 | 0.8 | 0.9 | 1.0 | IPF13617  | 11394387..unknown function orf19.3971          | 13617 IPF13617  | No significant S.c. match                                                                                    |
| CA3397 | 0.6 | 1.0 | 1.2 | 1.0 | IPF13618  | complemer unknown function orf19.3972          | 13618 IPF13618  | PROTEIN Imolecular_function unknown                                                                          |
| CA3398 | 1.0 | 1.0 | 1.0 | 0.8 | IPF13621  | 11396437..unknown function orf19.3973          | 13621 IPF13621  | UNCLASSImolecular_function unknown                                                                           |
| CA3399 | 1.4 | 0.6 | 1.1 | 1.1 | PUT2      | complemer 1-pyrroline-5-carboxyle orf19.3974   | 13622 CaPUT2    | Amino acid oxidoreductase activity                                                                           |
| CA3400 | 0.5 | 1.0 | 1.2 | 0.9 | JNM1      | complemer mitosis protein, involve orf19.3976  | 13623 CaJNM1    | CELL CYC structural molecule activity                                                                        |
| CA3401 | 1.1 | 0.8 | 1.1 | 1.2 | IPF8652   | complemer putative GTP-binding p orf19.3977    | 8652 IPF8652    | UNCLASSImolecular_function unknown                                                                           |
| CA3402 | 0.9 | 1.0 | 1.0 | 1.0 | IPF8651   | 11402277..unknown function orf19.3978          | 8651 IPF8651    | UNCLASSImolecular_function unknown                                                                           |
| CA3403 | 1.3 | 0.9 | 1.1 | 1.1 | IPF8650   | complemer RNA helicase (by hom orf19.3980      | 8650 IPF8650    | CELL RES molecular_function unknown                                                                          |
| CA3404 | 6.1 | 0.5 | 1.7 | 1.1 | MAL31     | complemer maltose permease (by orf19.3981      | 8647 CaMAL31    | C-compour molecular_function unknown                                                                         |
| CA3405 | 1.4 | 0.9 | 0.9 | 0.9 | IPF8644   | 11414245..maltase (by homology) orf19.3982     | 8644 IPF8644    | C-compour hydrolase activity                                                                                 |
| CA3406 | 0.9 | 1.0 | 0.9 | 0.9 | IPF9711   | complemer unknown function orf19.3983          | 9711 IPF9711    | UNCLASSImolecular_function unknown                                                                           |
| CA3407 | 1.1 | 1.0 | 0.8 | 1.0 | IPF9406   | 11426364..unknown function orf19.13571         | 9406 IPF9406    | No significant S.c. match                                                                                    |
| CA3408 | 0.7 | 1.0 | 0.8 | 1.0 | IPF9407   | 11428214..similar to Saccharomy orf19.6151     | 9407 IPF9407    | CELLLULAFstructural molecule activity                                                                        |
| CA3409 | 0.9 | 0.8 | 0.8 | 1.1 | IPF9410   | complemer similar to Saccharomy orf19.6148     | 9410 IPF9410    | CELL CYC structural molecule activity                                                                        |
| CA3410 | 0.9 | 1.0 | 0.9 | 1.0 | IPF9411   | 11433417..unknown function orf19.6147          | 9411 IPF9411    | UNCLASSImolecular_function unknown                                                                           |
| CA3411 | 0.6 | 0.6 | 0.5 | 1.2 | IPF9413   | complemer unknown function orf19.13565         | 9413 IPF9413    | CELL CYC protein kinase activity,enzyme regulator activity                                                   |
| CA3412 | 1.6 | 1.4 | 1.4 | 1.1 | IPF9238   | complemer long chain fatty alcoho orf19.13562  | 9238 IPF9238    | No significant S.c. match                                                                                    |
| CA3413 | 1.2 | 1.0 | 1.0 | 1.0 | IPF9239   | complemer unknown function orf19.6142          | 9239 IPF9239    | No significant S.c. match                                                                                    |
| CA3414 | 1.2 | 0.9 | 1.2 | 1.0 | IPF9240   | complemer probable permease orf19.6141         | 9240 IPF9240    | C-compound and carbohydrate metabolism CELLULAR TRANSPORT AND TRANSPORT MECHANISMS SUBCELLULAR LOI           |
| CA3415 | 4.6 | 1.7 | 2.6 | 1.1 | FRE30.53  | 11443642..Strong similarity to ferr orf19.6140 | 17765 CaFRE30.5 | :REGULATION OF/INTERACTION WITH CELLULAR ENVIRONMENT Other virulence attributes                              |
| CA3416 | 4.6 | 2.0 | 2.7 | 1.3 | FRE30.3   | 11444320..Strong similarity to ferr orf19.6139 | 17763 CaFRE30.3 | :REGULATION OF/INTERACTION WITH CELLULAR ENVIRONMENT Other virulence attributes                              |
| CA3417 | 0.8 | 1.0 | 1.3 | 1.3 | FRE41     | 11446783..ferric reductase transr orf19.6138   | 12773 CaFRE41   | REGULATION OF/INTERACTION WITH CELLULAR ENVIRONMENT Other virulence attributes                               |
| CA3418 | 0.8 | 0.9 | 1.0 | 0.9 | IPF12777  | 11449360..unknown function orf19.6137          | 12777 IPF12777  | TRANSCRIPTION SUBCELLULAR LOCALISATION                                                                       |
| CA3419 | 0.7 | 1.0 | 1.1 | 1.0 | IPF12778  | complemer ribosomal protein, mito orf19.6136   | 12778 IPF12778  | PROTEIN tstructural molecule activity                                                                        |
| CA3420 | 0.7 | 1.0 | 0.9 | 1.0 | SMX4      | 11452544..U6 snRNA-associated Sm-like prote    | 12779 CaSMX4    | TRANSCR RNA binding                                                                                          |
| CA3421 | 0.9 | 1.2 | 0.9 | 1.0 | IPF19782  | complemer unknown function orf19.13554         | 19782 IPF19782  | CELL CYCLE AND DNA PROCESSING CONTROL OF CELLULAR ORGANIZATION SUBCELLULAR LOCALISATION                      |
| CA3422 | 1.1 | 1.0 | 1.0 | 0.8 | IPF17289  | 11454560..unknown function orf19.13553         | 17289 IPF17289  | UNCLASSImolecular_function unknown                                                                           |
| CA3423 | 1.0 | 0.8 | 1.1 | 1.0 | IPF3549   | complemer unknown function orf19.597           | 3549 IPF3549    | Nitrogen and sulphur metabolism                                                                              |
| CA3424 | 0.9 | 1.0 | 1.0 | 0.8 | NOP10     | complemer Nucleolar rRNA processing protein (  | 3544 CaNOP10    | No significcRNA binding                                                                                      |
| CA3425 | 1.3 | 1.1 | 0.9 | 1.2 | IPF11873  | complemer similar to Saccharomy orf19.593      | 11873 IPF11873  | CELLLULAFmolecular_function unknown                                                                          |
| CA3426 | 1.5 | 1.4 | 1.2 | 0.9 | IPF11869  | 11469541..unknown function orf19.592           | 11869 IPF11869  | UNCLASSIttransferase activity                                                                                |
| CA3427 | 0.9 | 1.2 | 1.1 | 1.0 | IPF11865  | complemer unknown function orf19.590           | 11865 IPF11865  | No significant S.c. match                                                                                    |
| CA3428 | 1.1 | 1.4 | 1.6 | 1.4 | VPS21     | complemer GTP-binding protein (b orf19.589     | 11863 CaVPS21   | PROTEIN FATE [folding modification destination] ""CELLULAR TRANSPORT AND TRANSPORT MECHANISMS SUBCELLUL      |
| CA3429 | 1.1 | 1.0 | 1.1 | 0.8 | IPF6380   | 11479667..unknown function orf19.588           | 6380 IPF6380    | UNCLASSImolecular_function unknown                                                                           |
| CA3430 | 0.9 | 0.9 | 1.3 | 1.1 | IPF6382   | complemer unknown function orf19.587           | 6382 IPF6382    | UNCLASSImolecular_function unknown                                                                           |
| CA3431 | 0.8 | 0.8 | 0.9 | 0.8 | FUN9      | 11481359..Protein involved in ves orf19.586    | 6383 CaFUN9     | CELLLULAFmolecular_function unknown                                                                          |
| CA3432 | 0.9 | 1.1 | 1.0 | 1.1 | MRPL17    | complemer ribosomal protein of th orf19.585    | 20133 CaMRPL17  | PROTEIN tstructural molecule activity                                                                        |
| CA3433 | 0.9 | 1.0 | 1.1 | 1.1 | IPF6387.3 | 11484272..unknown function, 3-prime end        | 6387 IPF6387.3  | No significant S.c. match                                                                                    |
| CA3434 | 0.9 | 1.0 | 0.9 | 1.2 | CCP1      | 11486211..Cytochrome-c peroxid orf19.584       | 6390 CaCCP1     | CELL RES oxidoreductase activity                                                                             |
| CA3435 | 0.7 | 1.0 | 1.1 | 0.9 | IPF6391   | 11487140..similarity to mammalia orf19.583     | 6391 IPF6391    | Amino acid oxidoreductase activity                                                                           |
| CA3436 | 1.5 | 1.1 | 1.1 | 0.8 | NRD1      | 11489739..Involved in regulation orf19.581     | 6394 CaNRD1     | TRANSCR RNA binding                                                                                          |
| CA3437 | 0.5 | 0.8 | 0.9 | 0.9 | IPF15925  | complemer unknown function orf19.10505         | 15925 IPF15925  | REGULATION OF/INTERACTION WITH CELLULAR ENVIRONMENT SUBCELLULAR LOCALISATION                                 |
| CA3438 | 0.9 | 1.2 | 1.0 | 1.0 | IPF11330  | 11495433..unknown function orf19.2987          | 11330 IPF11330  | UNCLASSImolecular_function unknown                                                                           |
| CA3439 | 0.5 | 1.1 | 0.8 | 1.0 | IPF11329  | complemer unknown function orf19.2986          | 11329 IPF11329  | No significant S.c. match                                                                                    |
| CA3440 | 1.2 | 1.0 | 0.8 | 0.9 | IPF11328  | 11497940..unknown function orf19.2985          | 11328 IPF11328  | No significant S.c. match                                                                                    |
| CA3441 | 0.4 | 1.0 | 1.0 | 1.0 | MST1      | 11498686..mitochondrial threonyl orf19.2984    | 11327 CaMST1    | SUBCELLLLigase activity                                                                                      |
| CA3442 | 1.2 | 1.0 | 0.8 | 0.9 | IPF11326  | complemer similar to Saccharomy orf19.2983     | 11326 IPF11326  | TRANSCR transcription regulator activity                                                                     |
| CA3443 | 0.3 | 1.0 | 0.9 | 1.0 | IPF11324  | 11501524..unknown function orf19.2982          | 11324 IPF11324  | PROTEIN lenzyme regulator activity                                                                           |

|        |     |     |     |     |            |                                     |                                       |       |            |                                        |                                                           |                                    |
|--------|-----|-----|-----|-----|------------|-------------------------------------|---------------------------------------|-------|------------|----------------------------------------|-----------------------------------------------------------|------------------------------------|
| CA3444 | 1.0 | 1.1 | 1.0 | 1.1 | IPF11323   | 11503175..unknown function          | orf19.2980                            | 11323 | IPF11323   | UNCLASSI                               | molecular_function                                        | unknown                            |
| CA3445 | 0.4 | 1.1 | 1.0 | 1.1 | IPF7325    | 11505637..unknown function          | orf19.2978                            | 7325  | IPF7325    | No significant                         | S.c. match                                                |                                    |
| CA3446 | 0.8 | 1.2 | 1.1 | 1.2 | IPF7324    | 11506679..unknown function          | orf19.2977                            | 7324  | IPF7324    | UNCLASSI                               | molecular_function                                        | unknown                            |
| CA3447 | 0.4 | 1.0 | 1.0 | 1.0 | YPT70      | complemer                           | GTP-binding protein (b orf19.2975     | 7322  | CaYPT70    | CELLULAR                               | TRANSPORT AND TRANSPORT MECHANISMS                        | SUBCELLULAR LOCALISATION           |
| CA3448 | 1.2 | 1.2 | 1.0 | 1.0 | YKT6       | 11509430..Endoplasmic Reticulum     | orf19.2974                            | 7321  | CaYKT6     | PROTEIN I                              | transporter activity                                      |                                    |
| CA3449 | 0.9 | 1.1 | 0.9 | 0.9 | IPF7320    | complemer                           | unknown function orf19.2973           | 7320  | IPF7320    | UNCLASSI                               | transporter activity                                      |                                    |
| CA3450 | 1.0 | 1.2 | 1.1 | 1.2 | PDE2       | complemer                           | Nucleotide phosphodie orf19.2972      | 7318  | CaPDE2     | Nucleotide                             | hydrolase activity                                        |                                    |
| CA3451 | 1.0 | 1.2 | 0.9 | 1.2 | IPF7316    | complemer                           | unknown function orf19.10488          | 7316  | IPF7316    | CELL                                   | CYCLE AND DNA PROCESSING CONTROL OF CELLULAR ORGANIZATION | SUBCELLULAR LOCALISATION           |
| CA3452 | 1.5 | 1.0 | 1.0 | 1.1 | IPF10541   | 11523174..unknown function          | orf19.1253                            | 10541 | IPF10541   | Phosphate                              | DNA binding,transcription regulator activity              |                                    |
| CA3453 | 0.7 | 0.8 | 1.0 | 1.1 | SEC23      | 11525673..Component of COPII c      | orf19.1254                            | 10536 | CaSEC23    | CELLULAF                               | enzyme regulator activity                                 |                                    |
| CA3454 | 1.6 | 1.0 | 1.0 | 1.2 | IPF10533.E | 11529937..unknown function, exo     | orf19.1255                            | 10533 | IPF10533.E | C-compound and carbohydrate metabolism | TRANSCRIPTION                                             | SUBCELLULAR LOCALISATION           |
| CA3455 | 1.2 | 1.1 | 1.1 | 1.0 | IPF10533.E | 11532466..unknown function, exo     | orf19.1256                            | 19641 | IPF10533.E | No significant                         | S.c. match                                                |                                    |
| CA3456 | 1.3 | 1.3 | 1.3 | 1.2 | IPF19986   | complemer                           | unknown function orf19.1259           | 19986 | IPF19986   | SUBCELL                                | molecular_function                                        | unknown                            |
| CA3457 | 1.0 | 1.0 | 1.1 | 1.0 | IPF8521    | complemer                           | unknown function orf19.1260           | 8521  | IPF8521    | TRANSCR                                | RNA binding                                               |                                    |
| CA3459 | 1.0 | 0.9 | 0.9 | 1.0 | CGT1.3F    | 11544397..mRNA capping enzym        | orf19.1261                            | 8518  | CaCGT1.3I  | TRANSCR                                | nucleotidyltransferase activity                           |                                    |
| CA3460 | 1.1 | 0.7 | 0.9 | 1.0 | CFL1       | complemer                           | ferric reductase orf19.1263           | 8516  | CaCFL1     | REGULATION OF/INTERACTION WITH         | CELLULAR ENVIRONMENT                                      | SUBCELLULAR LOCALISATION           |
| CA3461 | 0.2 | 0.5 | 0.3 | 1.2 | CFL2       | complemer                           | ferric reductase (by ho orf19.1264    | 8512  | CaCFL2     | REGULATION OF/INTERACTION WITH         | CELLULAR ENVIRONMENT                                      | Other virulence attributes         |
| CA3462 | 0.7 | 0.9 | 0.8 | 1.1 | IPF14959   | 11556303..similar to Saccharomy     | orf19.1265                            | 14959 | IPF14959   | CELLULAF                               | molecular_function                                        | unknown                            |
| CA3463 | 1.3 | 1.0 | 0.8 | 1.1 | ALG8       | complemer                           | glucosyltransferase (by orf19.1659    | 12530 | CaALG8     | C-compou                               | transferase activity                                      |                                    |
| CA3464 | 0.7 | 1.0 | 0.9 | 0.9 | DBP5       | 11565513..RNA helicase (by hom      | orf19.1661                            | 12528 | CaDBP5     | CLASSIFIC                              | RNA binding,helicase activity                             |                                    |
| CA3465 | 0.8 | 1.0 | 0.9 | 1.1 | MRP1.3F    | complemer                           | Mitochondrial ribosomal protein of th | 18330 | CaMRP1.3   | PROTEIN I                              | structural molecule activity                              |                                    |
| CA3466 | 1.1 | 0.8 | 0.8 | 1.3 | MRP1.5F    | complemer                           | mitochondrial ribosom: orf19.1662     | 12526 | CaMRP1.5   | PROTEIN                                | SYNTHESIS                                                 | SUBCELLULAR LOCALISATION           |
| CA3467 | 0.8 | 1.1 | 0.9 | 0.9 | MNT2       | 11570759..Alpha-1,2-mannosyltra     | orf19.1663                            | 6319  | CaMNT2     | C-compou                               | transferase activity                                      |                                    |
| CA3468 | 1.5 | 1.1 | 0.9 | 0.9 | IPF6318    | complemer                           | beta-glucosidase (by h orf19.1664     | 6318  | IPF6318    | No significant                         | S.c. match                                                |                                    |
| CA3469 | 1.0 | 0.7 | 0.8 | 1.2 | MNT1       | 11577042..Mannosyltransferase ir    | orf19.1665                            | 6315  | CaMNT1     | C-compou                               | transferase activity                                      |                                    |
| CA3470 | 1.3 | 0.9 | 0.8 | 1.1 | IPF6310    | 11580716..unknown function          | orf19.1666                            | 6310  | IPF6310    | No significant                         | S.c. match                                                |                                    |
| CA3471 | 1.1 | 0.9 | 0.8 | 1.0 | IPF6308    | 11582920..unknown function          | orf19.1667                            | 6308  | IPF6308    | UNCLASSIFIED                           | PROTEINS                                                  |                                    |
| CA3472 | 0.7 | 1.0 | 0.9 | 0.9 | IPF6305.E  | 11586885..unknown function, exon 2  |                                       | 6306  | IPF6305.ex | UNCLASSI                               | molecular_function                                        | unknown                            |
| CA3473 | 0.9 | 1.0 | 1.0 | 1.0 | IPF6305.E  | 11587374..unknown function, exo     | orf19.1668                            | 6305  | IPF6305.ex | UNCLASSI                               | molecular_function                                        | unknown                            |
| CA3474 | 1.8 | 1.2 | 1.0 | 0.8 | AFG3       | complemer                           | Member of the Sec18p orf19.1669       | 8090  | CaAFG3     | PROTEIN I                              | peptidase activity                                        |                                    |
| CA3475 | 1.2 | 1.0 | 1.1 | 0.9 | BRO1       | 11592591..required for normal res   | orf19.1670                            | 8087  | CaBRO1     | CELL                                   | RES transporter activity                                  |                                    |
| CA3476 | 1.0 | 1.0 | 1.0 | 1.1 | NUP2.3EO   | 11599995..nucleoporine involved     | orf19.3583                            | 3232  | CaNUP2.3   | CELLULAF                               | structural molecule activity                              |                                    |
| CA3477 | 1.0 | 1.0 | 1.2 | 1.0 | IPF3229    | complemer                           | unknown function orf19.3582           | 3229  | IPF3229    | UNCLASSI                               | transferase activity                                      |                                    |
| CA3478 | 0.7 | 1.0 | 0.9 | 1.0 | IPF3227    | 11602346..similar to Saccharomy     | orf19.3581                            | 3227  | IPF3227    | CELL                                   | CYC molecular_function                                    | unknown                            |
| CA3479 | 0.4 | 0.8 | 0.8 | 1.1 | ATP4       | complemer                           | F1FO-ATPase complex orf19.3579        | 3225  | CaATP4     | ENERGY                                 | C structural molecule activity                            |                                    |
| CA3480 | 0.8 | 1.0 | 1.0 | 1.1 | IPF3224    | complemer                           | unknown function orf19.3578           | 3224  | IPF3224    | No significant                         | S.c. match                                                |                                    |
| CA3481 | 0.7 | 0.8 | 0.8 | 1.0 | IPF3223    | 11605324..unknown function          |                                       | 3223  | IPF3223    | No significant                         | S.c. match                                                |                                    |
| CA3482 | 0.8 | 0.7 | 0.9 | 1.0 | COQ5       | complemer                           | C-methyltransferase (t orf19.3577     | 3222  | CaCOQ5     | Metabolism                             | transferase activity                                      |                                    |
| CA3483 | 0.2 | 0.4 | 0.3 | 0.8 | CDC19      | complemer                           | pyruvate kinase (by ho orf19.3575     | 19988 | CaCDC19    | C-compou                               | transferase activity                                      |                                    |
| CA3484 | 1.2 | 0.9 | 1.0 | 0.8 | IPF3214    | 11610094..HSP-mitochondrial che     | orf19.3574                            | 3214  | IPF3214    | PROTEIN I                              | molecular_function                                        | unknown                            |
| CA3485 | 1.1 | 1.0 | 1.1 | 1.2 | IPF3213    | complemer                           | similar to Saccharomy orf19.3573      | 3213  | IPF3213    | PROTEIN I                              | hydrolase activity                                        |                                    |
| CA3486 | 0.9 | 1.0 | 1.1 | 1.0 | IPF3206    | complemer                           | unknown function orf19.3572           | 3206  | IPF3206    | No significant                         | S.c. match                                                |                                    |
| CA3487 | 1.2 | 1.1 | 1.0 | 1.0 | IPF3203    | complemer                           | unknown function orf19.3569           | 3203  | IPF3203    | UNCLASSI                               | molecular_function                                        | unknown                            |
| CA3488 | 1.0 | 1.0 | 1.0 | 1.1 | IPF3198    | 11623067..unknown function          | orf19.3568                            | 3198  | IPF3198    | UNCLASSI                               | molecular_function                                        | unknown                            |
| CA3489 | 0.7 | 1.2 | 1.0 | 1.1 | IPF3195    | 11625182..unknown function          | orf19.3567                            | 3195  | IPF3195    | Metabolism                             | of vitamins cofactors and prosthetic groups               |                                    |
| CA3490 | 0.8 | 0.9 | 0.9 | 0.9 | IPF3192    | 11626857..unknown function          | orf19.3565                            | 3192  | IPF3192    | UNCLASSIFIED                           | PROTEINS                                                  |                                    |
| CA3491 | 0.8 | 0.9 | 1.1 | 0.9 | RPC40      | 11628235..RNA polymerase (by h      | orf19.3564                            | 3191  | CaRPC40    | TRANSCR                                | nucleotidyltransferase activity                           |                                    |
| CA3492 | 0.9 | 1.0 | 1.0 | 1.0 | IPF3189    | 11630027..unknown function          | orf19.3563                            | 3189  | IPF3189    | No significant                         | S.c. match                                                |                                    |
| CA3493 | 1.0 | 1.3 | 1.5 | 1.5 | CDC7       | complemer                           | serine/threonine protei orf19.3561    | 19635 | CaCDC7     | CELL                                   | CYC protein kinase activity                               |                                    |
| CA3494 | 1.8 | 1.0 | 0.8 | 0.9 | RPB5       | 11634820..DNA-directed RNA pol      | orf19.6340                            | 17067 | CaRPB5     | TRANSCR                                | nucleotidyltransferase activity                           |                                    |
| CA3495 | 0.7 | 1.0 | 1.1 | 1.2 | RIB7       | complemer                           | HTP reductase (By ho) orf19.6341      | 17066 | CaRIB7     | Metabolism                             | HTP hydrolase activity                                    |                                    |
| CA3496 | 1.1 | 0.9 | 0.8 | 0.8 | IPF17064   | complemer                           | unknown function orf19.6342           | 17064 | IPF17064   | No significant                         | S.c. match                                                |                                    |
| CA3497 | 0.7 | 0.7 | 0.9 | 0.9 | FEN11      | 11638516..Fatty acid elongase re    | orf19.6343                            | 18329 | CaFEN11    | C-compou                               | transferase activity                                      |                                    |
| CA3498 | 1.0 | 1.1 | 0.9 | 1.1 | RBK1       | complemer                           | Ribokinase (by homolc orf19.6344      | 15253 | CaRBK1     | C-compou                               | transferase activity                                      |                                    |
| CA3499 | 0.8 | 1.1 | 1.1 | 1.0 | RPG1       | complemer                           | Translation initiation fa orf19.6345  | 15252 | CaRPG1     | CELL                                   | CYC translation regulator activity                        |                                    |
| CA3500 | 1.0 | 0.9 | 0.8 | 1.1 | IPF14487   | complemer                           | unknown function orf19.6346           | 14487 | IPF14487   | UNCLASSI                               | molecular_function                                        | unknown                            |
| CA3501 | 1.1 | 1.1 | 1.1 | 1.0 | CDC40      | 11645515..cell division control pro | orf19.6347                            | 14486 | CaCDC40    | CELL                                   | CYC RNA binding                                           |                                    |
| CA3502 | 0.9 | 1.0 | 0.9 | 1.0 | IPF14485   | complemer                           | unknown function orf19.6348           | 14485 | IPF14485   | No significant                         | S.c. match                                                |                                    |
| CA3503 | 0.7 | 0.9 | 1.1 | 0.8 | IPF15890   | complemer                           | cytoskeletal binding pr orf19.6349    | 15890 | IPF15890   | CELLULAR                               | TRANSPORT AND TRANSPORT MECHANISMS                        | CELL FATE SUBCELLULAR LOCALISATION |
| CA3504 | 0.8 | 1.0 | 1.1 | 1.0 | IPF11369   | 11653630..unknown function          | orf19.6350                            | 11369 | IPF11369   | No significant                         | S.c. match                                                |                                    |
| CA3505 | 0.4 | 0.9 | 0.8 | 0.9 | IPF11372   | 11654824..unknown function          | orf19.6351                            | 11372 | IPF11372   | No significant                         | S.c. match                                                |                                    |
| CA3506 | 0.9 | 0.9 | 1.0 | 1.0 | IFA5       | complemer                           | unknown function orf19.6353           | 11374 | CaIFA5     | Nucleotide                             | metabolism                                                | CELL CYCLE AND DNA PROCESSING      |
| CA3507 | 1.0 | 1.1 | 1.1 | 1.0 | IPF11375   | 11659625..unknown function          | orf19.6354                            | 11375 | IPF11375   | TRANSCRIPTION                          | SUBCELLULAR LOCALISATION                                  |                                    |
| CA3508 | 1.0 | 1.2 | 1.1 | 1.2 | RSA2       | complemer                           | Involved in ribosome b orf19.6355     | 11376 | CaRSA2     | TRANSCR                                | molecular_function                                        | unknown                            |
| CA3509 | 1.1 | 0.8 | 1.0 | 1.1 | PRP6       | 11662111..snRNP(U4/U6)-associ       | orf19.6356                            | 19783 | CaPRP6     | TRANSCR                                | RNA binding                                               |                                    |
| CA3510 | 1.4 | 1.0 | 1.0 | 0.7 | MAD1       | complemer                           | coiled-coil protein invol orf19.6357  | 11251 | CaMAD1     | CELL                                   | CYC molecular_function                                    | unknown                            |
| CA3511 | 0.8 | 1.0 | 1.0 | 0.9 | MMS2       | 11667629..ubiquitin-conjugating e   | orf19.6358                            | 11248 | CaMMS2     | CELL                                   | CYCLE AND DNA PROCESSING                                  |                                    |
| CA3512 | 0.8 | 1.0 | 1.3 | 1.3 | IPF11247   | complemer                           | unknown function orf19.6359           | 11247 | IPF11247   | PROTEIN I                              | molecular_function                                        | unknown                            |
| CA3513 | 1.3 | 1.0 | 0.9 | 0.9 | IPF11246   | 11668915..unknown function          | orf19.6360                            | 11246 | IPF11246   | No significant                         | S.c. match                                                |                                    |
| CA3514 | 1.1 | 1.2 | 1.1 | 1.1 | IPF11245   | complemer                           | similar to Saccharomy orf19.6362      | 11245 | IPF11245   | REGULATI                               | protein binding                                           |                                    |
| CA3515 | 0.9 | 1.3 | 1.0 | 1.0 | MRPL15     | complemer                           | mitochondrial ribosom: orf19.6363     | 11656 | CaMRPL15   | PROTEIN I                              | structural molecule activity                              |                                    |



|        |     |     |     |     |            |                                    |             |       |            |                                                                                                  |
|--------|-----|-----|-----|-----|------------|------------------------------------|-------------|-------|------------|--------------------------------------------------------------------------------------------------|
| CA3517 | 1.3 | 1.0 | 0.9 | 0.9 | IFA22      | 11677479..Unknown function         | orf19.1002  | 15371 | CaIFA22    | CELL CYCLE AND DNA PROCESSING SUBCELLULAR LOCALISATION                                           |
| CA3518 | 1.4 | 1.0 | 1.1 | 0.8 | AMYG2      | 11686305..glucoamylase             | orf19.8614  | 6791  | CaAMYG2    | C-compound and carbohydrate metabolism ENERGY SUBCELLULAR LOCALISATION                           |
| CA3519 | 0.9 | 1.0 | 1.0 | 1.2 | IPF6787    | 11689544..unknown function         | orf19.8613  | 6787  | IPF6787    | No significant S.c. match                                                                        |
| CA3520 | 0.8 | 0.8 | 1.1 | 1.1 | IPF6785    | complemer unknown function         | orf19.997   | 6785  | IPF6785    | No significant S.c. match                                                                        |
| CA3521 | 0.8 | 0.9 | 0.9 | 1.0 | IFA15      | complemer unknown function         | orf19.996   | 6784  | CaIFA15    | Nucleotide metabolism CELL CYCLE AND DNA PROCESSING CELLULAR COMMUNICATION/SIGNAL TRANSDUCTION M |
| CA3522 | 0.8 | 1.1 | 1.2 | 0.9 | IPF20134   | complemer unknown function         | orf19.994   | 20134 | IPF20134   | No significant S.c. match                                                                        |
| CA3523 | 0.9 | 1.0 | 0.9 | 1.0 | IPF20135   | complemer unknown function         | orf19.993   | 20135 | IPF20135   | TRANSCRIPTION SUBCELLULAR LOCALISATION                                                           |
| CA3524 | 0.9 | 1.1 | 1.1 | 1.0 | LKH1.3     | complemer PROBABLE LEUKOTF         | orf19.992   | 6778  | CaLKH1.3   | Lipid fatty-ε peptidase activity                                                                 |
| CA3525 | 0.8 | 1.0 | 1.1 | 0.9 | DJP1       | complemer DnaI-like protein invol  | orf19.8606  | 6776  | CaDJP1     | PROTEIN I chaperone activity                                                                     |
| CA3526 | 1.4 | 0.9 | 1.1 | 0.9 | MRPS5      | complemer Probable ribosomal pr    | orf19.8604  | 9936  | CaMRPS5    | PROTEIN I structural molecule activity                                                           |
| CA3527 | 1.1 | 0.9 | 1.3 | 1.0 | IPF9934    | complemer unknown function         | orf19.8603  | 9934  | IPF9934    | UNCLASSI molecular_function unknown                                                              |
| CA3528 | 2.0 | 1.3 | 1.2 | 1.1 | GLY1       | complemer L-threonine aldolase     | orf19.8601  | 9931  | CaGLY1     | Amino acid metabolism                                                                            |
| CA3529 | 1.4 | 1.0 | 1.0 | 0.9 | IPF9929    | complemer unknown function         | orf19.8600  | 9929  | IPF9929    | UNCLASSI molecular_function unknown                                                              |
| CA3530 | 1.0 | 1.0 | 1.4 | 1.0 | IPF9926    | complemer alkaline phosphatase (   | orf19.984   | 9926  | IPF9926    | Phosphate metabolism SUBCELLULAR LOCALISATION                                                    |
| CA3532 | 0.8 | 1.0 | 1.1 | 0.9 | IPF13448   | complemer similar to Saccharomy    | orf19.6365  | 13448 | IPF13448   | CELLULAF protein phosphatase activity                                                            |
| CA3533 | 1.2 | 1.1 | 1.2 | 1.2 | IPF13450   | 11719589..unknown function         | orf19.6366  | 13450 | IPF13450   | No significant S.c. match                                                                        |
| CA3534 | 0.8 | 0.8 | 0.8 | 0.7 | SSB1       | 11720670..heat shock protein 70    | orf19.6367  | 13454 | CaSSB1     | PROTEIN I chaperone activity                                                                     |
| CA3535 | 1.3 | 1.1 | 1.1 | 1.1 | IPF13458   | complemer unknown function         | orf19.6369  | 13458 | IPF13458   | UNCLASSI protein kinase activity                                                                 |
| CA3536 | 1.3 | 1.2 | 1.2 | 1.0 | IPF5414    | 11724185..unknown function         | orf19.6371  | 5414  | IPF5414    | No significant S.c. match                                                                        |
| CA3537 | 1.6 | 1.2 | 1.0 | 0.8 | PSU1       | complemer suppressor of petit mut  | orf19.6373  | 5418  | CaPSU1     | ENERGY hydrolase activity                                                                        |
| CA3538 | 0.7 | 1.0 | 1.0 | 1.0 | ATP10      | 11728576..F1FO ATPase complex      | orf19.6374  | 5420  | CaATP10    | PROTEIN I molecular_function unknown                                                             |
| CA3539 | 0.8 | 0.4 | 0.5 | 0.9 | RPS22      | 11730432..ribosomal protein by h   | orf19.6375  | 5422  | CaRPS22    | PROTEIN I structural molecule activity                                                           |
| CA3540 | 1.9 | 1.3 | 1.5 | 1.0 | PTC5       | 11731874..Type 2C Protein Phos     | orf19.6376  | 5424  | CaPTC5     | PROTEIN I hydrolase activity                                                                     |
| CA3541 | 1.0 | 0.9 | 1.1 | 1.2 | IPF5425    | complemer similar to Saccharomy    | orf19.6377  | 5425  | IPF5425    | PROTEIN I transferase activity                                                                   |
| CA3542 | 1.3 | 0.9 | 0.9 | 0.9 | IPF5426    | complemer putative methyltransfer  | orf19.6378  | 5426  | IPF5426    | UNCLASSI molecular_function unknown                                                              |
| CA3543 | 0.9 | 1.0 | 1.2 | 1.2 | IPF5428    | 11736291..unknown function         | orf19.6379  | 5428  | IPF5428    | No significant S.c. match                                                                        |
| CA3544 | 1.7 | 0.9 | 1.0 | 1.0 | BPT1.3F    | complemer membrane transporter     | orf19.6382  | 12646 | CaBPT1.3F  | CELL RESCUE DEFENSE AND VIRULENCE ""TRANSPORT FACILITATION                                       |
| CA3545 | 1.5 | 1.3 | 1.2 | 1.1 | BPT1.5F    | complemer membrane transporter     | orf19.6383  | 12648 | CaBPT1.5F  | CELL RESCUE DEFENSE AND VIRULENCE ""TRANSPORT FACILITATION                                       |
| CA3546 | 8.7 | 5.5 | 4.9 | 1.9 | ACO1       | complemer aconitate hydratase (b)  | orf19.6385  | 12652 | CaACO1     | C-compour lyase activity                                                                         |
| CA3547 | 1.1 | 0.6 | 1.0 | 0.9 | ADE13      | complemer adenylosuccinate lyas    | orf19.3870  | 12183 | CaADE13    | Nucleotide lyase activity                                                                        |
| CA3548 | 0.9 | 0.6 | 1.1 | 0.8 | IPF12179   | 11754067..unknown function         | orf19.3872  | 12179 | IPF12179   | UNCLASSI molecular_function unknown                                                              |
| CA3549 | 0.7 | 0.9 | 1.0 | 0.8 | ARC40      | 11755199..subunit of the Arp2/3 c  | orf19.3873  | 12178 | CaARC40    | CELL FATI structural molecule activity                                                           |
| CA3550 | 1.1 | 1.0 | 1.2 | 1.0 | IPF13228   | 11758649..unknown function         | orf19.3874  | 13228 | IPF13228   | No significant S.c. match                                                                        |
| CA3551 | 1.0 | 0.9 | 1.2 | 1.2 | IPF13229   | complemer unknown function         | orf19.3876  | 13229 | IPF13229   | UNCLASSI molecular_function unknown                                                              |
| CA3552 | 1.2 | 1.0 | 1.0 | 1.0 | IPF13231   | 11763102..unknown function         | orf19.3877  | 13231 | IPF13231   | No significant S.c. match                                                                        |
| CA3553 | 1.2 | 0.9 | 1.2 | 1.2 | IFA16.5    | 11764065..unknown function, 5-pr   | orf19.3878  | 13232 | CaIFA16.5  | No significant S.c. match                                                                        |
| CA3554 | 0.9 | 1.0 | 1.1 | 0.9 | IPF7770    | complemer unknown function         | orf19.3881  | 7770  | IPF7770    | UNCLASSI molecular_function unknown                                                              |
| CA3555 | 1.1 | 0.9 | 1.0 | 1.0 | IPF7766    | complemer unknown function         | orf19.3884  | 7766  | IPF7766    | CELLULAR TRANSPORT AND TRANSPORT MECHANISMS                                                      |
| CA3556 | 0.8 | 0.9 | 1.0 | 0.9 | IPF7764    | 11771032..unknown function         | orf19.3885  | 7764  | IPF7764    | No significant S.c. match                                                                        |
| CA3557 | 0.7 | 1.0 | 1.0 | 0.9 | IPF7763    | complemer unknown function         | orf19.3886  | 7763  | IPF7763    | CELL CYCLE AND DNA PROCESSING SUBCELLULAR LOCALISATION                                           |
| CA3558 | 1.6 | 0.9 | 1.0 | 0.8 | IPF7760    | complemer unknown function         | orf19.3887  | 7760  | IPF7760    | No significant S.c. match                                                                        |
| CA3559 | 0.3 | 0.3 | 0.6 | 0.6 | PGI1       | complemer Glucose-6-phosphate i    | orf19.3888  | 7759  | CaPGI1     | C-compour isomerase activity                                                                     |
| CA3560 | 0.8 | 0.9 | 1.0 | 1.1 | CZF1       | 11792323..canal zinc finger protei | orf19.3127  | 10612 | CaCZF1     | No significant S.c. match                                                                        |
| CA3561 | 0.8 | 0.2 | 0.9 | 0.6 | SLY1       | 11794297..hydrophilic suppressor   | orf19.3128  | 10610 | CaSLY1     | CELLULAF protein binding                                                                         |
| CA3562 | 0.5 | 1.0 | 1.2 | 1.0 | IPF7823    | complemer similar to Saccharomy    | orf19.3129  | 7823  | IPF7823    | CELL CYC hydrolase activity                                                                      |
| CA3563 | 1.1 | 1.1 | 1.1 | 1.1 | IPF7819    | complemer unknown function         | orf19.3130  | 7819  | IPF7819    | UNCLASSI molecular_function unknown                                                              |
| CA3564 | 0.4 | 0.8 | 0.9 | 1.0 | IPF7817    | 11799576..putative NADH-depend     | orf19.3131  | 7817  | IPF7817    | ENERGY                                                                                           |
| CA3565 | 1.0 | 0.9 | 0.9 | 1.1 | MSC2       | complemer Probable membrane p      | orf19.3132  | 7815  | CaMSC2     | UNCLASSI transporter activity                                                                    |
| CA3566 | 0.4 | 0.8 | 0.8 | 0.9 | GUT2       | complemer Glycerol-3-phosphate     | orf19.3133  | 7812  | CaGUT2     | C-compour oxidoreductase activity                                                                |
| CA3567 | 1.0 | 0.9 | 1.0 | 1.0 | IPF7804.5F | 11809479..unknown function, 5-pr   | orf19.3134  | 7804  | IPF7804.5F | No significant S.c. match                                                                        |
| CA3568 | 0.8 | 1.0 | 1.1 | 1.0 | IPF7804.3F | 11809962..unknown function, 3-pr   | orf19.3135  | 7802  | IPF7804.3F | UNCLASSI molecular_function unknown                                                              |
| CA3569 | 1.0 | 2.0 | 1.1 | 1.3 | IPF3268    | 11812168..unknown function         | orf19.3136  | 3268  | IPF3268    | CELL CYCLE AND DNA PROCESSING                                                                    |
| CA3570 | 0.8 | 1.1 | 1.0 | 1.1 | NOP1       | complemer Fibrillar                | orf19.3138  | 3267  | CaNOP1     | TRANSCR transferase activity                                                                     |
| CA3571 | 1.1 | 1.1 | 1.0 | 0.9 | IPF3264    | complemer unknown function         | orf19.10651 | 3264  | IPF3264    | Lipid fatty-acid and isoprenoid metabolism                                                       |
| CA3572 | 1.0 | 0.7 | 1.1 | 1.1 | IPF18321   | complemer unknown function         |             | 18321 | IPF18321   | No significant S.c. match                                                                        |
| CA3573 | 0.6 | 1.0 | 1.0 | 1.0 | RFA2       | complemer DNA replication factor   | orf19.2267  | 13308 | CaRFA2     | CELL CYC DNA binding                                                                             |
| CA3574 | 0.9 | 0.9 | 0.9 | 0.9 | IPF19584   | 11822330..unknown function         | orf19.2266  | 19584 | IPF19584   | SUBCELLL protein binding                                                                         |
| CA3575 | 1.3 | 0.9 | 0.9 | 0.9 | IPF11108   | complemer unknown function         | orf19.2265  | 11108 | IPF11108   | CELL CYC molecular_function unknown                                                              |
| CA3576 | 1.0 | 0.8 | 1.1 | 0.9 | IPF11107   | 11826725..probably stearyl-CoA     | orf19.2264  | 11107 | IPF11107   | Lipid fatty-acid and isoprenoid metabolism ""SUBCELLULAR LOCALISATION                            |
| CA3577 | 1.5 | 0.9 | 1.1 | 0.9 | IPF11106   | 11828594..unknown function         | orf19.2263  | 11106 | IPF11106   | No significant S.c. match                                                                        |
| CA3578 | 0.8 | 1.0 | 1.1 | 1.1 | IPF11105   | complemer probable quinone oxid    | orf19.2262  | 11105 | IPF11105   | CLASSIFIC molecular_function unknown                                                             |
| CA3579 | 0.9 | 1.0 | 1.1 | 1.0 | HSH49      | complemer spliceosome-associate    | orf19.2261  | 11104 | CaHSH49    | TRANSCR RNA binding                                                                              |
| CA3580 | 0.9 | 1.0 | 1.1 | 1.0 | IPF16141   | complemer unknown function         | orf19.2260  | 16141 | IPF16141   | UNCLASSIFIED PROTEINS                                                                            |
| CA3581 | 0.8 | 1.0 | 1.1 | 1.1 | IPF16143   | 11833107..unknown function         | orf19.2259  | 16143 | IPF16143   | No significant S.c. match                                                                        |
| CA3582 | 0.4 | 0.9 | 0.9 | 1.0 | IPF15466   | 11834150..unknown function         | orf19.2258  | 15466 | IPF15466   | No significant S.c. match                                                                        |
| CA3583 | 0.9 | 1.0 | 1.0 | 0.8 | IPF20137   | complemer unknown function         | orf19.2257  | 20137 | IPF20137   | UNCLASSI molecular_function unknown                                                              |
| CA3584 | 0.9 | 0.9 | 1.1 | 0.9 | IPF15468   | complemer unknown function         | orf19.2256  | 15468 | IPF15468   | UNCLASSI molecular_function unknown                                                              |
| CA3585 | 2.3 | 1.2 | 1.1 | 1.0 | IFT1       | complemer unknown function         | orf19.2253  | 16720 | CaIFT1     | No significant S.c. match                                                                        |
| CA3586 | 1.2 | 1.1 | 1.0 | 0.8 | IFT3       | complemer Unknown function         | orf19.2252  | 15939 | CaIFT3     | No significant S.c. match                                                                        |
| CA3587 | 1.0 | 1.2 | 1.0 | 1.1 | AAH1       | complemer adenosine deaminase      | orf19.2251  | 10117 | CaAAH1     | Nucleotide hydrolase activity                                                                    |
| CA3588 | 1.1 | 1.1 | 1.0 | 0.9 | SPE3       | complemer putrescine aminoprop     | orf19.2250  | 10115 | CaSPE3     | Secondary transferase activity                                                                   |

|        |     |     |     |     |            |                                              |             |       |            |                                        |                                   |                                              |
|--------|-----|-----|-----|-----|------------|----------------------------------------------|-------------|-------|------------|----------------------------------------|-----------------------------------|----------------------------------------------|
| CA3589 | 0.8 | 0.9 | 1.0 | 1.0 | IPF10113   | 11847040..unknown function                   | orf19.2249  | 10113 | IPF10113   | UNCLASSI                               | molecular_function                | unknown                                      |
| CA3590 | 1.7 | 1.2 | 1.0 | 0.9 | ARE2       | 11849844..acyl-CoA sterol acyltra            | orf19.2248  | 10110 | CaARE2     | Lipid fatty-ε                          | transferase activity              |                                              |
| CA3591 | 1.6 | 1.0 | 1.0 | 0.8 | IFT2       | 11853104..unknown function                   | orf19.2247  | 12902 | CaIFT2     | TRANSPORT                              | FACILITATION                      |                                              |
| CA3592 | 0.8 | 1.0 | 1.3 | 1.0 | IPF12900   | 11854883..unknown function                   | orf19.2246  | 12900 | IPF12900   | UNCLASSI                               | molecular_function                | unknown                                      |
| CA3593 | 1.4 | 1.0 | 1.0 | 0.8 | YPT71      | complemer GTP-binding protein of             | orf19.2245  | 12899 | CaYPT71    | CELLULAF                               | hydrolase activity                |                                              |
| CA3594 | 0.7 | 1.0 | 0.8 | 1.2 | IPF6076.3  | complemer unknown function, 3-pr             | orf19.4922  | 6076  | IPF6076.3  | UNCLASSI                               | enzyme regulator activity         |                                              |
| CA3595 | 1.4 | 0.9 | 1.0 | 0.8 | IPF6079    | complemer putative permease (by              | orf19.4923  | 6079  | IPF6079    | C-compound and carbohydrate metabolism | TRANSPORT FACILITATION            |                                              |
| CA3596 | 1.6 | 1.1 | 1.0 | 0.8 | IPF6085    | 11863395..unknown function                   | orf19.4924  | 6085  | IPF6085    | No significant S.c. match              |                                   |                                              |
| CA3597 | 0.6 | 1.2 | 0.9 | 1.2 | BN11       | complemer regulator of budding (b            | orf19.4927  | 6091  | CaBN11     | CELL CYC                               | protein binding                   |                                              |
| CA3598 | 1.7 | 1.2 | 0.9 | 0.7 | SEC2       | complemer GDP/GTP exchange fa                | orf19.12394 | 6094  | CaSEC2     | CELLULAF                               | enzyme regulator activity         |                                              |
| CA3599 | 0.9 | 1.1 | 1.1 | 1.0 | IPF19785   | 11879559..unknown function                   | orf19.4929  | 19785 | IPF19785   | TRANSCR                                | translation regulator activity    |                                              |
| CA3600 | 1.0 | 0.9 | 0.7 | 0.8 | SPC3       | complemer signal peptidase subur             | orf19.4930  | 15621 | CaSPC3     | PROTEIN I                              | peptidase activity                |                                              |
| CA3601 | 0.6 | 1.1 | 0.8 | 1.0 | IPF15618   | complemer cysteinyl-tRNA synthet             | orf19.4931  | 15618 | IPF15618   | PROTEIN I                              | ligase activity                   |                                              |
| CA3602 | 0.5 | 0.6 | 0.6 | 1.1 | RPL14B.3   | 11887878..ribosomal protein L14B, 3-prime    | enc         | 12937 | CaRPL14B   | PROTEIN I                              | tRNA binding                      |                                              |
| CA3603 | 0.9 | 1.0 | 0.7 | 1.1 | MEF1       | complemer mitochondrial translati            | orf19.4932  | 12940 | CaMEF1     | PROTEIN I                              | translation regulator activity    |                                              |
| CA3604 | 1.1 | 1.0 | 0.9 | 1.0 | IPF12942   | complemer delta-12 fatty acid des            | orf19.4933  | 12942 | IPF12942   | No significant S.c. match              |                                   |                                              |
| CA3605 | 1.1 | 1.0 | 0.9 | 0.9 | IPF3865    | complemer unknown function                   | orf19.22    | 3865  | IPF3865    | SUBCELLULAR                            | LOCALISATION                      |                                              |
| CA3606 | 1.3 | 1.0 | 1.1 | 1.0 | RTA3       | 11902679..Unknown function                   | orf19.23    | 3859  | CaRTA3     | UNCLASSIFIED                           | PROTEINS                          |                                              |
| CA3607 | 0.9 | 1.5 | 1.0 | 1.1 | RTA2       | 11905078..Unknown function                   | orf19.24    | 3858  | CaRTA2     | UNCLASSI                               | transporter activity              |                                              |
| CA3608 | 0.8 | 1.0 | 0.9 | 1.2 | IPF3857    | 11906652..unknown function                   | orf19.25    | 3857  | IPF3857    | UNCLASSI                               | transferase activity              |                                              |
| CA3609 | 1.1 | 1.1 | 1.0 | 0.9 | IPF3856    | 11907851..similar to Saccharomy              | orf19.26    | 3856  | IPF3856    | PROTEIN I                              | enzyme regulator activity         |                                              |
| CA3610 | 0.7 | 1.2 | 1.0 | 1.0 | IPF3854    | 11909848..unknown function                   | orf19.27    | 3854  | IPF3854    | No significant S.c. match              |                                   |                                              |
| CA3611 | 1.2 | 1.0 | 0.8 | 1.0 | IPF3853    | complemer unknown function                   | orf19.28    | 3853  | IPF3853    | Nucleotide                             | transporter activity              |                                              |
| CA3612 | 0.8 | 1.0 | 0.8 | 1.1 | IPF3852    | 11912464..unknown function                   | orf19.29    | 3852  | IPF3852    | CELL CYC                               | molecular_function                | unknown                                      |
| CA3613 | 0.9 | 0.8 | 0.9 | 0.9 | SPF1       | complemer P-type ATPase                      | orf19.30    | 3849  | CaSPF1     | REGULATI                               | transporter activity              |                                              |
| CA3614 | 0.9 | 0.9 | 1.1 | 1.1 | IPF8878    | 11918837..unknown function                   | orf19.31    | 8878  | IPF8878    | CELL RESCUE                            | DEFENSE AND VIRULENCE ""CELL FATE |                                              |
| CA3615 | 1.0 | 1.0 | 1.1 | 1.1 | GIT1       | complemer glycerophosphoinosit               | orf19.34    | 8874  | CaGIT1     | Lipid fatty-ε                          | transporter activity              |                                              |
| CA3616 | 0.5 | 0.7 | 1.1 | 0.9 | ASN1       | 11927767..asparagine synthetase (by homolog) |             | 19994 | CaASN1     | Amino acid                             | ligase activity                   |                                              |
| CA3617 | 1.1 | 0.8 | 1.1 | 1.1 | IPF9069    | 11929978..unknown function                   | orf19.199   | 9069  | IPF9069    | ENERGY                                 |                                   |                                              |
| CA3618 | 1.0 | 0.9 | 1.1 | 1.2 | THO1       | complemer suppressor of the hpr1             | orf19.200   | 20138 | CaTHO1     | UNCLASSI                               | molecular_function                | unknown                                      |
| CA3619 | 0.6 | 1.0 | 0.9 | 0.9 | CDC47.5    | complemer cell division control pro          | orf19.202   | 9065  | CaCDC47.5  | CELL CYC                               | DNA binding                       |                                              |
| CA3620 | 1.6 | 1.1 | 1.1 | 0.9 | IPF9063    | complemer similar to Saccharomy              | orf19.203   | 9063  | IPF9063    | TRANSCR                                | molecular_function                | unknown                                      |
| CA3621 | 1.4 | 1.0 | 0.9 | 0.8 | IPF8942    | 11940739..unknown function                   | orf19.204   | 8942  | IPF8942    | No significant S.c. match              |                                   |                                              |
| CA3622 | 1.2 | 0.9 | 0.9 | 0.9 | IPF12022   | 11947135..extracellular alpha-1,4-           | orf19.7836  | 12022 | IPF12022   | No significant S.c. match              |                                   |                                              |
| CA3623 | 0.9 | 0.5 | 0.9 | 0.9 | IPF15911   | 11952810..unknown function                   | orf19.7838  | 15911 | IPF15911   | No significant S.c. match              |                                   |                                              |
| CA3625 | 2.0 | 0.9 | 1.0 | 1.1 | CYR1.3F    | complemer adenylate cyclase, 3-p             | orf19.12617 | 12339 | CaCYR1.3I  | Nucleotide                             | lyase activity                    |                                              |
| CA3626 | 2.0 | 1.2 | 1.0 | 1.0 | CYR1.5F    | complemer adenylate cyclase, 5-p             | orf19.12615 | 12336 | CaCYR1.5I  | Nucleotide metabolism                  | CELL CYCLE AND DNA PROCESSING     | CELLULAR COMMUNICATION/SIGNAL TRANSDUCTION M |
| CA3627 | 0.6 | 1.0 | 0.8 | 1.0 | IPF18318   | 11965072..unknown function                   | orf19.12613 | 18318 | IPF18318   | UNCLASSI                               | molecular_function                | unknown                                      |
| CA3628 | 1.1 | 0.9 | 1.2 | 1.2 | IPF18316.5 | complemer unknown function, 3-pr             | orf19.12611 | 18317 | IPF18316.5 | Nitrogen and sulphur                   | metabolism                        |                                              |
| CA3629 | 1.0 | 1.0 | 0.8 | 0.9 | IPF18316.5 | complemer unknown function, 5-pr             | orf19.12610 | 18316 | IPF18316.5 | No significant S.c. match              |                                   |                                              |
| CA3630 | 1.7 | 1.2 | 1.2 | 1.0 | IPF8129    | 11970757..unknown function                   | orf19.12609 | 8129  | IPF8129    | No significant S.c. match              |                                   |                                              |
| CA3631 | 1.2 | 1.1 | 1.1 | 1.1 | TIM54      | 11972073..Translocase for the ins            | orf19.12608 | 8130  | CaTIM54    | PROTEIN I                              | transporter activity              |                                              |
| CA3632 | 0.7 | 1.0 | 1.1 | 0.9 | DFR1       | complemer dihydrofolate reductas             | orf19.5142  | 8131  | CaDFR1     | Amino acid oxidoreductase              | activity                          |                                              |
| CA3633 | 0.8 | 0.8 | 1.2 | 1.0 | IFA19      | 11974620..unknown function                   | orf19.5141  | 8136  | CaIFA19    | UNCLASSIFIED                           | PROTEINS                          |                                              |
| CA3634 | 0.7 | 1.0 | 0.8 | 0.8 | IFA25      | 11977577..unknown function                   | orf19.5140  | 8138  | CaIFA25    | Nucleotide metabolism                  | CELL CYCLE AND DNA PROCESSING     | CELLULAR COMMUNICATION/SIGNAL TRANSDUCTION M |
| CA3635 | 1.7 | 1.1 | 1.3 | 1.0 | IFA20      | 11980400..unknown function                   | orf19.5139  | 8140  | CaIFA20    | Nucleotide metabolism                  | CELL CYCLE AND DNA PROCESSING     | CELLULAR COMMUNICATION/SIGNAL TRANSDUCTION M |
| CA3636 | 0.9 | 1.2 | 1.1 | 1.1 | IFA21      | 11983197..unknown function                   | orf19.12603 | 16529 | CaIFA21    | CELL RESCUE                            | DEFENSE AND VIRULENCE             |                                              |
| CA3637 | 1.1 | 0.7 | 0.9 | 1.0 | IPF9255    | complemer unknown function                   | orf19.5136  | 9255  | IPF9255    | UNCLASSI                               | molecular_function                | unknown                                      |
| CA3638 | 1.1 | 0.9 | 0.9 | 1.0 | IPF9252    | 11990889..unknown function                   | orf19.5134  | 9252  | IPF9252    | UNCLASSIFIED                           | PROTEINS                          |                                              |
| CA3639 | 1.2 | 0.8 | 0.8 | 1.1 | IPF9251    | complemer unknown function                   | orf19.5133  | 9251  | IPF9251    | Lipid fatty-ε                          | DNA binding                       |                                              |
| CA3640 | 1.1 | 1.0 | 1.2 | 1.1 | VPS24      | 12002153..endosomal Vps protein              | orf19.2031  | 4120  | CaVPS24    | PROTEIN I                              | molecular_function                | unknown                                      |
| CA3641 | 1.1 | 1.3 | 0.9 | 1.0 | IPF4122    | complemer unknown function                   | orf19.2032  | 4122  | IPF4122    | No significant S.c. match              |                                   |                                              |
| CA3642 | 1.1 | 1.0 | 1.0 | 1.0 | IPF4123    | complemer unknown function                   | orf19.2033  | 4123  | IPF4123    | No significant S.c. match              |                                   |                                              |
| CA3643 | 0.8 | 0.9 | 1.0 | 0.9 | IPF4124    | complemer unknown function                   | orf19.2034  | 4124  | IPF4124    | No significant S.c. match              |                                   |                                              |
| CA3644 | 1.1 | 1.2 | 0.9 | 1.0 | IPF4126    | complemer unknown function                   | orf19.2035  | 4126  | IPF4126    | TRANSPORT                              | FACILITATION                      |                                              |
| CA3645 | 1.0 | 1.0 | 1.1 | 1.1 | IPF4127    | complemer putative dimeric dihydr            | orf19.2036  | 4127  | IPF4127    | No significant S.c. match              |                                   |                                              |
| CA3646 | 0.7 | 1.0 | 1.1 | 0.9 | IPF4128    | complemer unknown function                   | orf19.2037  | 4128  | IPF4128    | No significant S.c. match              |                                   |                                              |
| CA3647 | 1.3 | 1.1 | 1.0 | 1.3 | IPF4129    | 12009894..unknown function                   | orf19.2038  | 4129  | IPF4129    | UNCLASSIFIED                           | PROTEINS                          |                                              |
| CA3648 | 1.1 | 1.1 | 0.9 | 1.0 | MSF1       | complemer phenylalanine-tRNA li              | orf19.2039  | 4131  | CaMSF1     | PROTEIN I                              | ligase activity                   |                                              |
| CA3649 | 0.5 | 1.1 | 1.1 | 0.9 | IPF4132    | complemer unknown function                   | orf19.2040  | 4132  | IPF4132    | Lipid fatty-ε                          | molecular_function                | unknown                                      |
| CA3650 | 0.8 | 1.0 | 0.9 | 1.0 | IPF4134    | 12014907..unknown function                   | orf19.2041  | 4134  | IPF4134    | CELL CYC                               | molecular_function                | unknown                                      |
| CA3651 | 0.5 | 1.0 | 0.8 | 0.9 | MSS1       | complemer Mitochondrial GTPase               | orf19.2042  | 7447  | CaMSS1     | TRANSCRIPTION                          | PROTEIN SYNTHESIS                 | SUBCELLULAR LOCALISATION                     |
| CA3652 | 0.8 | 1.1 | 1.0 | 1.0 | NBP35      | 12018549..Nucleotide-binding pro             | orf19.2043  | 7450  | CaNBP35    | UNCLASSIFIED                           | PROTEINS                          |                                              |
| CA3653 | 0.9 | 0.9 | 1.0 | 0.9 | IPF7451    | 12019654..unknown function                   | orf19.2044  | 7451  | IPF7451    | No significant S.c. match              |                                   |                                              |
| CA3654 | 0.9 | 0.9 | 0.9 | 1.0 | IPF7452    | 12021656..unknown function                   | orf19.2045  | 7452  | IPF7452    | UNCLASSI                               | molecular_function                | unknown                                      |
| CA3655 | 0.9 | 1.2 | 1.0 | 1.2 | POT13      | complemer Acetyl-CoA C-acyltrans             | orf19.2046  | 7453  | CaPOT13    | Lipid fatty-acid and isoprenoid        | metabolism ""ENERGY               | SUBCELLULAR LOCALISATION                     |
| CA3656 | 0.4 | 1.1 | 0.9 | 0.9 | IPF7456    | complemer unknown function                   | orf19.2047  | 7456  | IPF7456    | UNCLASSI                               | molecular_function                | unknown                                      |
| CA3657 | 1.3 | 0.8 | 1.2 | 1.2 | IPF7459    | complemer unknown function                   | orf19.2049  | 7459  | IPF7459    | No significant S.c. match              |                                   |                                              |
| CA3658 | 1.6 | 1.2 | 1.0 | 0.9 | TGL1       | 12028548..Triacylglycerol lipase (l          | orf19.2050  | 7463  | CaTGL1     | Lipid fatty-ε                          | hydrolase activity                |                                              |
| CA3660 | 1.4 | 0.8 | 1.3 | 0.9 | IPF17794   | 12030737..unknown function                   |             | 17994 | IPF17794   | No significant S.c. match              |                                   |                                              |
| CA3661 | 1.5 | 1.0 | 1.0 | 0.9 | IPF17991   | complemer unknown function                   | orf19.6465  | 17991 | IPF17991   | C-compound and carbohydrate            | metabolism                        | SUBCELLULAR LOCALISATION                     |

|        |      |     |     |     |            |                                                |             |       |            |                                                                                                         |
|--------|------|-----|-----|-----|------------|------------------------------------------------|-------------|-------|------------|---------------------------------------------------------------------------------------------------------|
| CA3662 | 1.0  | 1.0 | 1.1 | 0.9 | IPF17021   | 12037174..unknown function                     | orf19.6464  | 17021 | IPF17021   | Nucleotide metabolism                                                                                   |
| CA3663 | 1.3  | 1.1 | 0.7 | 1.1 | IPF11432   | complemer unknown function                     | orf19.6463  | 11432 | IPF11432   | UNCLASSI molecular_function unknown                                                                     |
| CA3664 | 1.4  | 1.0 | 1.0 | 0.9 | IPF11433   | complemer unknown function, 3-pr               | orf19.6462  | 11433 | IPF11433   | UNCLASSI molecular_function unknown                                                                     |
| CA3666 | 0.8  | 1.0 | 1.3 | 0.9 | IPF11435   | complemer unknown function                     | orf19.6461  | 11435 | IPF11435   | ENERGY Cchaperone activity                                                                              |
| CA3667 | 1.8  | 1.1 | 1.0 | 0.9 | IPF16323   | 12043118..similar to Saccharomy                | orf19.6460  | 16323 | IPF16323   | PROTEIN Ihydrolase activity                                                                             |
| CA3668 | 0.5  | 1.0 | 1.0 | 1.1 | DPP3       | complemer Diacylglycerol Pyrophc               | orf19.6459  | 19996 | CaDPP3     | Lipid fatty-εhydrolase activity                                                                         |
| CA3669 | 0.7  | 1.2 | 0.9 | 1.1 | IPF19997   | 12048788..by homology to S. cerevisiae: U6 sn  |             | 19997 | IPF19997   | No significant S.c. match                                                                               |
| CA3670 | 1.3  | 1.0 | 0.8 | 1.1 | IPF13934   | 12049541..unknown function                     | orf19.6458  | 13934 | IPF13934   | No significant S.c. match                                                                               |
| CA3671 | 1.0  | 1.1 | 1.0 | 1.0 | IPF13933   | complemer unknown function                     | orf19.6457  | 13933 | IPF13933   | C-compour molecular_function unknown                                                                    |
| CA3672 | 0.7  | 1.1 | 1.3 | 0.8 | IPF13669   | 12053915..unknown function                     | orf19.6456  | 13669 | IPF13669   | No significant S.c. match                                                                               |
| CA3673 | 0.7  | 0.9 | 0.9 | 0.9 | IPF13667   | complemer unknown function                     | orf19.6455  | 13667 | IPF13667   | UNCLASSI molecular_function unknown                                                                     |
| CA3674 | 1.5  | 1.0 | 1.0 | 0.8 | IPF19529   | 12056759..unknown function, exo                | orf19.6454  | 19529 | IPF19529   | No significant S.c. match                                                                               |
| CA3675 | 0.9  | 1.1 | 1.2 | 1.2 | IPF19529   | 12058245..unknown function, exo                | orf19.6453  | 18311 | IPF19529   | No significant S.c. match                                                                               |
| CA3676 | 0.3  | 0.5 | 0.7 | 0.8 | RBP1       | complemer rapamycin-binding prol               | orf19.6452  | 8077  | CaRBP1     | PROTEIN Iisomerase activity                                                                             |
| CA3677 | 1.1  | 0.9 | 0.9 | 1.1 | SOU3       | 12070103..putative sorbitol utilizat           | orf19.732   | 8391  | CaSOU3     | ENERGY SUBCELLULAR LOCALISATION                                                                         |
| CA3678 | 0.7  | 1.0 | 1.1 | 1.0 | IPF8392    | 12071254..unknown function                     | orf19.731   | 8392  | IPF8392    | CLASSIFIC molecular_function unknown                                                                    |
| CA3679 | 1.0  | 1.2 | 1.1 | 1.2 | IPF20142   | 12073061..unknown function                     | orf19.730   | 20142 | IPF20142   | CELL FATIenzyme regulator activity                                                                      |
| CA3680 | 1.1  | 0.9 | 1.1 | 1.1 | IPF8395    | 12076135..unknown function                     | orf19.729   | 8395  | IPF8395    | No significant S.c. match                                                                               |
| CA3681 | 1.1  | 0.9 | 1.0 | 0.9 | IPF19787   | complemer unknown function                     | orf19.728   | 19787 | IPF19787   | UNCLASSI protein binding                                                                                |
| CA3683 | 1.1  | 1.0 | 0.9 | 1.1 | PPZ1       | complemer ser/thr phosphatase re               | orf19.726   | 13615 | CaPPZ1     | CELL RES protein phosphatase activity                                                                   |
| CA3684 | 1.0  | 1.1 | 1.0 | 1.0 | IPF13613   | 12100562..unknown function                     | orf19.725   | 13613 | IPF13613   | No significant S.c. match                                                                               |
| CA3685 | 1.5  | 1.0 | 1.5 | 1.1 | IPF19540   | complemer unknown function                     | orf19.723   | 19540 | IPF19540   | TRANSCR molecular_function unknown                                                                      |
| CA3686 | 0.4  | 0.9 | 1.0 | 1.0 | IPF4890    | 12111800..unknown function                     | orf19.13642 | 4890  | IPF4890    | TRANSPO transporter activity                                                                            |
| CA3687 | 1.0  | 1.0 | 0.7 | 1.1 | IPF4889    | complemer unknown function                     | orf19.6264  | 4889  | IPF4889    | C-compound and carbohydrate metabolism ENERGY TRANSCRIPTION CELL FATE SUBCELLULAR LOCALISATION          |
| CA3688 | 0.3  | 0.9 | 0.8 | 1.0 | YIP3.3     | 12115214..protein of unknown function, 3-prime |             | 4885  | CaYIP3.3   | CELLULAF molecular_function unknown                                                                     |
| CA3689 | 0.3  | 0.6 | 0.7 | 1.0 | RPS22A     | 12116904..ribosomal protein S15ε               | orf19.6265  | 4882  | CaRPS22A   | PROTEIN Istructural molecule activity                                                                   |
| CA3690 | 0.8  | 0.6 | 0.7 | 1.0 | RPS14B     | 12118211..ribosomal protein (by homology)      |             | 4881  | CaRPS14B   | PROTEIN I:RNA binding                                                                                   |
| CA3691 | 1.0  | 1.0 | 0.9 | 1.0 | IPF4880    | 12118919..unknown function                     | orf19.6266  | 4880  | IPF4880    | TRANSCRIPTION CELL FATE SUBCELLULAR LOCALISATION                                                        |
| CA3692 | 0.5  | 1.1 | 1.0 | 1.0 | IPF4876    | 12122185..unknown function                     | orf19.6267  | 4876  | IPF4876    | No significant S.c. match                                                                               |
| CA3693 | 0.9  | 1.0 | 0.8 | 1.2 | IPF4874    | 12125054..unknown function                     | orf19.6268  | 4874  | IPF4874    | UNCLASSI molecular_function unknown                                                                     |
| CA3694 | 1.0  | 1.0 | 0.8 | 1.0 | IPF4872.3f | complemer unknown function, 3-pr               | orf19.6269  | 4873  | IPF4872.3f | PROTEIN FATE [folding modification destination] ""CELLULAR TRANSPORT AND TRANSPORT MECHANISMS SUBCELLUL |
| CA3695 | 0.9  | 1.1 | 0.8 | 1.1 | IPF4872.5f | complemer unknown function, 5-pr               | orf19.6270  | 4872  | IPF4872.5f | No significant S.c. match                                                                               |
| CA3696 | 0.7  | 1.0 | 0.9 | 1.0 | IPF4868    | 12131198..unknown function                     | orf19.13650 | 4868  | IPF4868    | SUBCELLL molecular_function unknown                                                                     |
| CA3697 | 1.1  | 0.9 | 1.0 | 0.8 | IPF4866    | complemer similar to Saccharomy                | orf19.13651 | 4866  | IPF4866    | PROTEIN Ipeptidase activity                                                                             |
| CA3698 | 0.5  | 1.0 | 0.9 | 0.9 | IPF4861    | 12137078..unknown function                     | orf19.6274  | 4861  | IPF4861    | No significant S.c. match                                                                               |
| CA3699 | 0.9  | 1.1 | 1.0 | 0.9 | IPF4860    | complemer similarity to ribosomal              | orf19.6275  | 4860  | IPF4860    | CLASSIFIC protein kinase activity                                                                       |
| CA3700 | 1.1  | 1.4 | 1.0 | 1.2 | IPF4859    | complemer unknown function                     | orf19.6276  | 4859  | IPF4859    | No significant S.c. match                                                                               |
| CA3701 | 0.8  | 0.7 | 1.0 | 1.1 | IPF11936   | complemer unknown function, 5-pr               | orf19.13656 | 19586 | IPF11936   | No significant S.c. match                                                                               |
| CA3703 | 2.5  | 1.4 | 1.3 | 1.3 | IPF11945   | complemer unknown function                     | orf19.6281  | 11945 | IPF11945   | No significant S.c. match                                                                               |
| CA3704 | 1.0  | 0.8 | 0.9 | 0.9 | IPF5671    | complemer unknown function                     | orf19.4946  | 5671  | IPF5671    | No significant S.c. match                                                                               |
| CA3705 | 1.2  | 0.8 | 0.9 | 1.1 | MSH6       | 12160626..DNA mismatch repair                  | orf19.4945  | 5670  | CaMSH6     | CELL CYC DNA binding                                                                                    |
| CA3706 | 0.7  | 0.7 | 1.0 | 1.0 | PSA2       | complemer mannose-1-phosphate                  | orf19.4943  | 5668  | CaPSA2     | C-compound and carbohydrate metabolism CONTROL OF CELLULAR ORGANIZATION                                 |
| CA3707 | 0.8  | 3.3 | 1.5 | 1.5 | TYE7       | 12170168..Basic helix-loop-helix t             | orf19.4941  | 5663  | CaTYE7     | C-compour DNA binding,transcription regulator activity                                                  |
| CA3708 | 0.8  | 0.8 | 1.0 | 1.0 | HIP1       | 12171574..Histidine permease (by               | orf19.4940  | 7876  | CaHIP1     | Amino acid metabolism CELLULAR TRANSPORT AND TRANSPORT MECHANISMS REGULATION OF/INTERACTION WITI        |
| CA3709 | 0.9  | 1.1 | 1.0 | 0.9 | IPF7880    | 12173743..unknown function                     | orf19.4939  | 7880  | IPF7880    | UNCLASSI molecular_function unknown                                                                     |
| CA3710 | 2.3  | 1.1 | 1.1 | 1.1 | CHS3.5F    | 12180005..chitin-UDP acetyl-gluc               | orf19.4938  | 7886  | CaCHS3.5I  | C-compound and carbohydrate metabolism CELL FATE CONTROL OF CELLULAR ORGANIZATION SUBCELLULAR LOCAL     |
| CA3711 | 1.3  | 1.1 | 1.0 | 1.0 | CHS3.3F    | 12180306..chitin-UDP acetyl-gluc               | orf19.4937  | 7889  | CaCHS3.3I  | C-compour transferase activity                                                                          |
| CA3712 | 0.9  | 0.9 | 0.8 | 1.1 | IPF7891    | complemer unknown function                     | orf19.4936  | 7891  | IPF7891    | No significant S.c. match                                                                               |
| CA3713 | 11.7 | 1.5 | 3.2 | 1.2 | OPS4       | complemer opaque - phase specifi               | orf19.4934  | 15453 | CaOPS4     | No significant S.c. match                                                                               |
| CA3714 | 1.4  | 1.2 | 1.0 | 1.1 | IPF16223   | 12194080..unknown function                     | orf19.11639 | 16223 | IPF16223   | UNCLASSI molecular_function unknown                                                                     |
| CA3715 | 1.3  | 1.0 | 1.0 | 0.8 | IPF6205    | 12197699..unknown function                     | orf19.4164  | 6205  | IPF6205    | UNCLASSIRNA binding                                                                                     |
| CA3716 | 1.3  | 1.2 | 1.2 | 1.0 | IPF6203    | complemer unknown function                     | orf19.11642 | 6203  | IPF6203    | TRANSCRIPTION                                                                                           |
| CA3717 | 1.1  | 1.0 | 1.2 | 0.8 | IPF6192    | 12205742..unknown function                     | orf19.11643 | 6192  | IPF6192    | UNCLASSI molecular_function unknown                                                                     |
| CA3718 | 0.9  | 1.0 | 1.2 | 0.9 | POP7       | complemer Nuclear RNase P subu                 | orf19.11644 | 6191  | CaPOP7     | TRANSCR RNA binding                                                                                     |
| CA3719 | 1.1  | 0.8 | 1.1 | 1.1 | IPF6190    | 12207199..unknown function                     | orf19.11645 | 6190  | IPF6190    | No significant S.c. match                                                                               |
| CA3720 | 1.2  | 0.7 | 1.1 | 1.1 | IFL3       | complemer Unknown function                     | orf19.11646 | 6188  | CaIFL3     | CELL RESCUE DEFENSE AND VIRULENCE ""CELL FATE                                                           |
| CA3721 | 0.8  | 0.9 | 1.0 | 1.1 | IPF6186    | complemer unknown function                     | orf19.11647 | 6186  | IPF6186    | No significant S.c. match                                                                               |
| CA3722 | 1.3  | 1.0 | 1.0 | 0.9 | PHO13      | 12212650..4-nitrophenylphosphat                | orf19.4172  | 6184  | CaPHO13    | Phosphate metabolism SUBCELLULAR LOCALISATION                                                           |
| CA3723 | 1.2  | 1.1 | 1.0 | 1.1 | DPH2       | 12213872..Diphtheria toxin resista             | orf19.4173  | 6183  | CaDPH2     | Amino acid molecular_function unknown                                                                   |
| CA3724 | 1.4  | 1.1 | 1.3 | 1.1 | IPF6181    | complemer similar to Saccharomy                | orf19.4174  | 6181  | IPF6181    | Nucleotide transporter activity                                                                         |
| CA3725 | 1.5  | 1.3 | 1.2 | 0.9 | TOK1.3     | complemer Outward-rectifier potas              | orf19.4175  | 6179  | CaTOK1.3   | CELLULAF transporter activity                                                                           |
| CA3726 | 1.1  | 1.0 | 1.5 | 1.0 | IPF6175    | complemer unknown function                     | orf19.4176  | 6175  | IPF6175    | PROTEIN Istructural molecule activity                                                                   |
| CA3727 | 1.6  | 1.1 | 1.1 | 0.9 | HIS5.3F    | complemer Histidinol-phosphate ai              | orf19.4177  | 6173  | CaHIS5.3f  | Amino acid transferase activity                                                                         |
| CA3729 | 1.0  | 0.9 | 0.9 | 1.0 | IPF11901   | complemer unknown function                     | orf19.4179  | 11901 | IPF11901   | No significant S.c. match                                                                               |
| CA3730 | 1.2  | 1.0 | 1.0 | 0.8 | IPF11900   | 12223031..unknown function                     | orf19.4180  | 11900 | IPF11900   | PROTEIN Itransporter activity                                                                           |
| CA3731 | 0.8  | 0.8 | 1.0 | 1.2 | SPC2       | 12224114..signal peptidase 18 kD               | orf19.4181  | 11899 | CaSPC2     | PROTEIN Iprotein binding                                                                                |
| CA3732 | 0.9  | 1.0 | 1.0 | 0.9 | IPF11898   | complemer unknown function                     | orf19.4182  | 11898 | IPF11898   | UNCLASSIFIED PROTEINS                                                                                   |
| CA3733 | 0.8  | 1.3 | 1.2 | 1.2 | IPF11897   | 12225959..unknown function                     | orf19.11659 | 11897 | IPF11897   | C-compound and carbohydrate metabolism SUBCELLULAR LOCALISATION                                         |
| CA3735 | 1.5  | 0.9 | 1.0 | 0.9 | IPF5534    | 12229437..5-oxo-1,2,5-tricarboxili             | orf19.2184  | 5534  | IPF5534    | UNCLASSIFIED PROTEINS                                                                                   |
| CA3736 | 0.7  | 0.9 | 1.0 | 1.0 | IPF5533    | complemer ABC transporter (by hc               | orf19.2183  | 5533  | IPF5533    | TRANSPO transporter activity,hydrolase activity                                                         |
| CA3737 | 1.9  | 1.3 | 1.2 | 1.3 | BLM3       | 12235622..bleomycin resistance (               | orf19.2182  | 5529  | CaBLM3     | UNCLASSI molecular_function unknown                                                                     |

|        |     |     |     |     |            |                                                |             |       |            |              |                      |                    |            |            |             |              |             |              |
|--------|-----|-----|-----|-----|------------|------------------------------------------------|-------------|-------|------------|--------------|----------------------|--------------------|------------|------------|-------------|--------------|-------------|--------------|
| CA3738 | 1.0 | 1.1 | 1.0 | 0.9 | IPF5526    | complemer unknown function                     | orf19.2180  | 5526  | IPF5526    | UNCLASSI     | molecular_function   | unknown            |            |            |             |              |             |              |
| CA3739 | 0.3 | 0.5 | 0.6 | 1.2 | RPS10.3    | complemer ribosomal protein, 3-prime end (by h |             | 5524  | CaRPS10.3  | PROTEIN      | structural_molecule  | activity           |            |            |             |              |             |              |
| CA3740 | 2.3 | 0.7 | 1.3 | 1.3 | SIT1       | complemer Ferrioxamine B perme                 | orf19.2179  | 5522  | CaSIT1     | CELL         | RES                  | transporter        | activity   |            |             |              |             |              |
| CA3741 | 1.3 | 0.9 | 0.9 | 0.9 | MRS4       | complemer RNA splicing protein a               | orf19.2178  | 5513  | CaMRS4     | TRANSCR      | transporter          | activity           |            |            |             |              |             |              |
| CA3742 | 1.6 | 1.2 | 1.1 | 1.0 | IFM3       | complemer 2-hydroxyacid dehydro                | orf19.2176  | 5511  | CaIFM3     | C-compound   | and                  | carbohydrate       | metabolism |            |             |              |             |              |
| CA3743 | 1.2 | 1.3 | 1.2 | 1.1 | IPF19998   | 12253720..unknown function                     | orf19.2175  | 19998 | IPF19998   | UNCLASSI     | oxidoreductase       | activity           |            |            |             |              |             |              |
| CA3744 | 1.1 | 0.8 | 1.2 | 0.9 | RAD57      | 12255054..DNA-repair like protein              | orf19.2174  | 10144 | CaRAD57    | CELL         | CYC                  | protein            | binding    |            |             |              |             |              |
| CA3745 | 0.9 | 1.1 | 0.9 | 1.0 | MAF1       | 12257282..nuclear protein by hom               | orf19.2173  | 10146 | CaMAF1     | PROTEIN      | I                    | molecular_function | unknown    |            |             |              |             |              |
| CA3746 | 1.9 | 1.0 | 1.1 | 1.1 | ARA1       | 12258916..D-arabinose dehydrog                 | orf19.2172  | 10148 | CaARA1     | C-compou     | oxidoreductase       | activity           |            |            |             |              |             |              |
| CA3747 | 2.2 | 2.5 | 3.6 | 1.1 | IPF10153   | complemer membrane transporter                 | orf19.2170  | 10153 | IPF10153   | UNCLASSI     | molecular_function   | unknown            |            |            |             |              |             |              |
| CA3748 | 1.2 | 0.9 | 0.9 | 1.1 | IPF7385    | 12269447..unknown function                     | orf19.3430  | 7385  | IPF7385    | No           | significant          | S.c.               | match      |            |             |              |             |              |
| CA3749 | 1.1 | 0.9 | 1.2 | 1.0 | IPF7389    | complemer unknown function                     | orf19.3429  | 7389  | IPF7389    | No           | significant          | S.c.               | match      |            |             |              |             |              |
| CA3750 | 1.1 | 1.2 | 1.3 | 1.0 | IPF7377    | 12278199..unknown function                     | orf19.3428  | 7377  | IPF7377    | UNCLASSIFIED | PROTEINS             |                    |            |            |             |              |             |              |
| CA3751 | 1.2 | 1.0 | 0.9 | 0.8 | IPF7378    | 12279864..unknown function                     | orf19.3427  | 7378  | IPF7378    | No           | significant          | S.c.               | match      |            |             |              |             |              |
| CA3752 | 0.3 | 1.0 | 0.8 | 1.0 | TIF51.3    | 12281670..translation initiation fac           | orf19.3426  | 20144 | CaTIF51.3  | UNCLASSI     | translation          | regulator          | activity   |            |             |              |             |              |
| CA3753 | 1.7 | 1.1 | 1.1 | 0.7 | IPF14743   | 12284650..unknown function                     | orf19.3425  | 14743 | IPF14743   | UNCLASSIFIED | PROTEINS             |                    |            |            |             |              |             |              |
| CA3754 | 1.1 | 0.8 |     | 1.1 | TIF3       | 12286967..translation initiation fac           | orf19.3423  | 16643 | CaTIF3     | PROTEIN      | translation          | regulator          | activity   |            |             |              |             |              |
| CA3755 | 1.5 | 1.0 | 1.0 | 0.9 | IPF17743   | 12289536..Unknown function                     |             | 17743 | IPF17743   | TRANSCR      | transcription        | regulator          | activity   |            |             |              |             |              |
| CA3756 | 1.4 | 1.5 | 1.1 | 1.3 | IPF8884    | complemer unknown function                     | orf19.3422  | 8884  | IPF8884    | UNCLASSI     | molecular_function   | unknown            |            |            |             |              |             |              |
| CA3757 | 0.2 | 0.3 | 0.7 | 1.0 | MAE1       | 12300384..mitochondrial malic en               | orf19.3419  | 8888  | CaMAE1     | C-compou     | oxidoreductase       | activity           |            |            |             |              |             |              |
| CA3758 | 1.0 | 0.9 | 0.9 | 1.0 | IPF8889    | complemer putative arginase (by h              | orf19.10922 | 8889  | IPF8889    | Amino        | acid                 | metabolism         | Nitrogen   | and        | sulphur     | metabolism   | SUBCELLULAR | LOCALISATION |
| CA3759 | 1.4 | 1.0 |     | 1.0 | IPF13139   | 12310473..unknown function                     | orf19.2910  | 13139 | IPF13139   | No           | significant          | S.c.               | match      |            |             |              |             |              |
| CA3760 | 0.8 | 0.7 | 0.9 | 0.8 | ERG26      | complemer C-3 sterol dehydrogen                | orf19.2909  | 13138 | CaERG26    | Lipid        | fatty-oxidoreductase | activity           |            |            |             |              |             |              |
| CA3761 | 1.4 | 1.0 | 1.0 | 0.9 | IFR3       | complemer unknown function                     | orf19.2908  | 13137 | CaIFR3     | SUBCELLULAR  | LOCALISATION         |                    |            |            |             |              |             |              |
| CA3762 | 1.0 | 0.9 | 1.2 | 1.0 | IPF13135   | complemer unknown function                     | orf19.2907  | 13135 | IPF13135   | No           | significant          | S.c.               | match      |            |             |              |             |              |
| CA3763 | 1.2 | 1.0 | 1.0 | 1.0 | IPF13070   | complemer unknown function                     | orf19.2906  | 13070 | IPF13070   | No           | significant          | S.c.               | match      |            |             |              |             |              |
| CA3764 | 1.0 | 1.1 | 1.1 | 0.9 | IPF13072   | complemer unknown function                     | orf19.2905  | 13072 | IPF13072   | No           | significant          | S.c.               | match      |            |             |              |             |              |
| CA3765 | 3.5 | 1.4 | 1.7 | 1.0 | IPF18298   | 12321271..unknown function                     | orf19.2904  | 18298 | IPF18298   | Lipid        | fatty-acid           | and                | isoprenoid | metabolism |             |              |             |              |
| CA3766 | 1.5 | 0.9 | 1.0 | 0.9 | IPF18298.3 | 12321970..unknown function, 3-pr               | orf19.2903  | 16014 | IPF18298.3 | No           | significant          | S.c.               | match      |            |             |              |             |              |
| CA3767 | 0.8 | 1.0 | 0.9 | 1.2 | NUP60      | complemer Putative nuclear pore                | orf19.2901  | 13471 | CaNUP60    | CELLULAF     | structural           | molecule           | activity   |            |             |              |             |              |
| CA3768 | 1.0 | 1.0 | 1.0 | 1.0 | IPF13467   | complemer Putative peroxisomal 2               | orf19.2899  | 13467 | IPF13467   | ENERGY       | SUBCELLULAR          | LOCALISATION       |            |            |             |              |             |              |
| CA3769 | 1.3 | 1.1 | 1.2 | 0.9 | IPF13465   | complemer Putative anion transp                | orf19.2898  | 13465 | IPF13465   | CLASSIFIC    | transporter          | activity           |            |            |             |              |             |              |
| CA3770 | 1.1 | 0.8 | 1.0 | 1.0 | SOU2       | 12331220..Sorbitol utilization prote           | orf19.2897  | 13462 | CaSOU2     | ENERGY       | SUBCELLULAR          | LOCALISATION       |            |            |             |              |             |              |
| CA3771 | 0.7 | 1.0 | 1.2 | 1.0 | SOU1       | 12332930..Sorbitol utilization prote           | orf19.2896  | 11150 | CaSOU1     | ENERGY       | SUBCELLULAR          | LOCALISATION       |            |            |             |              |             |              |
| CA3772 | 0.9 | 0.9 | 1.0 | 1.1 | VMA8       | complemer CANAL VACUOLAR A                     | orf19.2895  | 11151 | CaVMA8     | CELLULAF     | transporter          | activity           |            |            |             |              |             |              |
| CA3773 | 0.8 | 1.1 | 5.0 | 1.1 | IPF11153   | 12335071..unknown function                     | orf19.2893  | 11153 | IPF11153   | CELL         | CYC                  | molecular_function | unknown    |            |             |              |             |              |
| CA3774 | 1.3 | 1.0 | 1.0 | 0.8 | IPF10437   | 12340660..budding protein-like (b              | orf19.2892  | 10437 | IPF10437   | CELL         | FAT                  | molecular_function | unknown    |            |             |              |             |              |
| CA3775 | 0.8 | 1.2 | 1.1 | 1.0 | AFG1       | complemer ATPase family gene (b                | orf19.2891  | 10436 | CaAFG1     | CLASSIFIC    | hydrolase            | activity           |            |            |             |              |             |              |
| CA3776 | 1.0 | 1.1 | 0.8 | 1.1 | IPF10435   | complemer unknown function                     | orf19.2890  | 10435 | IPF10435   | UNCLASSIFIED | PROTEINS             |                    |            |            |             |              |             |              |
| CA3777 | 0.9 | 1.2 | 0.9 | 0.9 | IPF10432   | 12347748..unknown function                     | orf19.2889  | 10432 | IPF10432   | UNCLASSI     | molecular_function   | unknown            |            |            |             |              |             |              |
| CA3778 | 1.0 | 1.3 | 1.0 | 1.6 | IPF10431   | complemer unknown function                     | orf19.2888  | 10431 | IPF10431   | No           | significant          | S.c.               | match      |            |             |              |             |              |
| CA3779 | 1.1 | 1.0 | 0.9 | 0.8 | IPF11221   | 12353921..unknown function                     | orf19.5841  | 11221 | IPF11221   | No           | significant          | S.c.               | match      |            |             |              |             |              |
| CA3780 | 0.9 | 1.0 | 0.8 | 0.9 | IPF11222   | complemer unknown function                     | orf19.5840  | 11222 | IPF11222   | No           | significant          | S.c.               | match      |            |             |              |             |              |
| CA3781 | 1.0 | 1.0 | 1.0 | 0.8 | IPF11224   | 12355232..similar to Saccharomy                | orf19.5839  | 11224 | IPF11224   | Lipid        | fatty-transporter    | activity           |            |            |             |              |             |              |
| CA3782 | 0.9 | 0.9 | 1.1 | 1.1 | SER2       | 12356659..phosphoserine phosph                 | orf19.5838  | 11225 | CaSER2     | Amino        | acid                 | hydrolase          | activity   |            |             |              |             |              |
| CA3783 | 1.2 | 1.1 | 1.0 | 0.8 | IPF11226   | complemer unknown function                     | orf19.5837  | 11226 | IPF11226   | UNCLASSI     | molecular_function   | unknown            |            |            |             |              |             |              |
| CA3784 | 0.9 | 0.8 | 1.3 | 1.0 | IPF11229   | complemer similar to Saccharomy                | orf19.5835  | 11229 | IPF11229   | TRANSCR      | molecular_function   | unknown            |            |            |             |              |             |              |
| CA3785 | 0.7 | 1.0 | 1.0 | 1.0 | IPF19788   | 12359996..similar to Saccharomy                | orf19.5834  | 19788 | IPF19788   | TRANSCR      | protein              | binding            |            |            |             |              |             |              |
| CA3786 | 1.2 | 1.3 | 0.9 | 0.9 | UFD1       | 12363355..Ubiquitin fusion degrad              | orf19.5833  | 14267 | CaUFD1     | PROTEIN      | I                    | protein            | binding    |            |             |              |             |              |
| CA3787 | 0.6 | 0.8 | 0.8 | 1.2 | HPT1       | complemer hypoxanthine guanine                 | orf19.5832  | 14266 | CaHPT1     | Nucleotide   | transferase          | activity           |            |            |             |              |             |              |
| CA3788 | 0.5 | 1.1 | 0.9 | 1.0 | IPF16445   | complemer unknown function                     | orf19.5831  | 16445 | IPF16445   | No           | significant          | S.c.               | match      |            |             |              |             |              |
| CA3789 | 1.0 | 1.3 |     | 1.2 | IPF11217   | 12368047..similar to Saccharomy                | orf19.13252 | 11217 | IPF11217   | PROTEIN      | I                    | chaperone          | activity   |            |             |              |             |              |
| CA3790 | 0.9 | 1.5 |     | 1.3 | IPF11215   | 12371174..unknown function                     | orf19.13250 | 11215 | IPF11215   | TRANSCR      | RNA                  | binding            |            |            |             |              |             |              |
| CA3791 | 1.5 | 1.0 | 1.0 | 0.8 | IPF11212   | complemer similar to Saccharomy                | orf19.5827  | 11212 | IPF11212   | CELL         | CYC                  | enzyme             | regulator  | activity   |             |              |             |              |
| CA3792 | 1.1 | 0.9 | 0.8 | 1.0 | UGA5       | complemer GABA-SPECIFIC TRA                    | orf19.5826  | 11211 | CaUGA5     | No           | significant          | S.c.               | match      |            |             |              |             |              |
| CA3793 | 0.9 | 0.9 | 1.3 | 1.1 | IPF5701    | 12377945..unknown function                     |             | 5701  | IPF5701    | No           | signific             | structural         | molecule   | activity   |             |              |             |              |
| CA3794 | 1.0 | 0.8 | 1.0 | 1.0 | NCB2       | complemer Transcriptional repress              | orf19.5825  | 5700  | CaNCB2     | TRANSCR      | transcription        | regulator          | activity   |            |             |              |             |              |
| CA3795 | 1.0 | 0.9 | 1.0 | 1.1 | IPF5699    | complemer Abhydrolase by homol                 | orf19.5824  | 5699  | IPF5699    | UNCLASSIFIED | PROTEINS             |                    |            |            |             |              |             |              |
| CA3796 | 0.6 | 0.6 | 0.9 | 1.1 | SGT2       | complemer small glutamine-rich te              | orf19.5823  | 5697  | CaSGT2     | UNCLASSI     | molecular_function   | unknown            |            |            |             |              |             |              |
| CA3797 | 1.1 | 1.2 | 1.1 | 1.3 | IPF5623    | complemer unknown function                     | orf19.5821  | 5693  | IPF5623    | UNCLASSI     | molecular_function   | unknown            |            |            |             |              |             |              |
| CA3799 | 0.7 | 0.9 | 1.2 | 1.0 | IPF7198    | 12387813..unknown function                     | orf19.10015 | 7198  | IPF7198    | CELL         | CYCLE                | AND                | DNA        | PROCESSING | SUBCELLULAR | LOCALISATION |             |              |
| CA3800 | 0.7 | 0.5 | 0.6 | 0.9 | RPL7A.3    | complemer 60S Ribosomal Protein L7-A, 3-prim   |             | 7197  | CaRPL7A.3  | PROTEIN      | structural           | molecule           | activity   |            |             |              |             |              |
| CA3801 | 1.1 | 1.1 | 1.2 | 0.9 | UGA4       | 12394943..GABA-specific transp                 | orf19.10016 | 7194  | CaUGA4     | No           | signific             | transporter        | activity   |            |             |              |             |              |
| CA3802 | 2.1 | 3.0 | 2.6 | 1.3 | AUT7.EXO   | complemer microtubule-associated protein esse  |             | 12408 | CaAUT7.ex  | PROTEIN      | I                    | protein            | binding    |            |             |              |             |              |
| CA3803 | 1.8 | 1.0 | 1.1 | 0.8 | IPF12407   | 12398139..unknown function                     | orf19.2481  | 12407 | IPF12407   | No           | significant          | S.c.               | match      |            |             |              |             |              |
| CA3804 | 0.7 | 0.6 | 0.9 | 1.0 | RIM1       | 12399164..telomere-binding prote               | orf19.2483  | 12405 | CaRIM1     | No           | significant          | S.c.               | match      |            |             |              |             |              |
| CA3805 | 0.8 | 0.9 | 0.7 | 0.9 | IPF12403   | complemer unknown function                     | orf19.2484  | 12403 | IPF12403   | PROTEIN      | I                    | molecular_function | unknown    |            |             |              |             |              |
| CA3806 | 2.2 | 1.0 | 1.3 | 0.9 | IPF9224    | 12401531..similar to Saccharomy                | orf19.2485  | 9224  | IPF9224    | CELL         | CYC                  | structural         | molecule   | activity   |             |              |             |              |
| CA3807 | 1.1 | 1.2 | 1.1 | 1.0 | IPF9225    | complemer unknown function                     | orf19.2487  | 9225  | IPF9225    | Nucleotide   | molecular_function   | unknown            |            |            |             |              |             |              |
| CA3808 | 1.3 | 1.0 | 1.1 | 1.2 | FAL1       | 12406774..ATP-dependent RNA                    | orf19.2488  | 9226  | CaFAL1     | TRANSCR      | RNA                  | binding            | helicase   | activity   |             |              |             |              |
| CA3809 | 1.1 | 0.8 | 1.0 | 1.0 | KAP123     | 12408257..karyopherin-beta prote               | orf19.2489  | 9227  | CaKAP123   | PROTEIN      | I                    | protein            | binding    |            |             |              |             |              |

|        |     |     |     |     |          |                                                 |                |                                                 |
|--------|-----|-----|-----|-----|----------|-------------------------------------------------|----------------|-------------------------------------------------|
| CA3810 | 1.0 | 0.9 | 1.0 | 0.9 | IPF9230  | 12412100..similar to Saccharomy orf19.2492      | 9230 IPF9230   | CELLULAF signal transducer activity             |
| CA3811 | 0.8 | 1.1 | 1.1 | 0.9 | PET112   | complemer glutamyl-tRNA (GLN) orf19.2494        | 9233 CaPET112  | PROTEIN {molecular_function unknown             |
| CA3812 | 0.9 | 0.9 | 1.2 | 0.9 | GSL22    | complemer 1,3-beta-D-glucan synt orf19.2495     | 4913 CaGSL22   | C-compound and carbohydrate metabolism          |
| CA3813 | 1.3 | 1.6 | 1.4 | 1.5 | FRP1     | 12421523.. member of the FRP far orf19.2496     | 4026 CaFRP1    | C-compound and carbohydrate metabolism          |
| CA3814 | 1.0 | 0.8 |     | 1.3 | IPF4023  | 12423340..unknown function orf19.2498           | 4023 IPF4023   | CELL FAT{molecular_function unknown             |
| CA3815 | 1.0 | 1.1 | 1.0 | 1.0 | CYP7     | complemer peptidyl-prolyl cis-trans orf19.2499  | 4018 CaCYP7    | TRANSCR chaperone activity                      |
| CA3816 | 0.9 | 0.9 | 1.2 | 1.1 | IPF4017  | 12426495..unknown function orf19.2500           | 4017 IPF4017   | No significant S.c. match                       |
| CA3818 | 0.7 | 0.8 | 0.9 | 0.9 | IPF6695  | 12443908..unknown function orf19.5773           | 6995 IPF6695   | UNCLASSI molecular_function unknown             |
| CA3819 | 1.2 | 1.0 | 0.7 | 1.1 | IPF6993  | 12451889..unknown function orf19.5772           | 6993 IPF6993   | UNCLASSI molecular_function unknown             |
| CA3820 | 0.8 | 1.0 | 0.9 | 1.0 | PBP2     | 12453231..PAB1 binding protein ( orf19.5771     | 6992 CaPBP2    | TRANSCR molecular_function unknown              |
| CA3821 | 1.8 | 1.0 | 0.9 | 0.9 | IPF6990  | complemer unknown function orf19.5770           | 6990 IPF6990   | UNCLASSI molecular_function unknown             |
| CA3822 | 0.8 | 0.9 | 0.9 | 1.0 | CUS2     | 12459077..cold sensitive U2 snRN orf19.5767     | 20001 CaCUS2   | TRANSCR RNA binding                             |
| CA3823 | 0.9 | 1.0 | 1.0 | 1.1 | IPF10651 | complemer unknown function orf19.5765           | 10651 IPF10651 | TRANSCR structural molecule activity            |
| CA3824 | 0.7 | 1.1 | 0.9 | 1.0 | SK18     | 12462546..antiviral protein-like (by orf19.5764 | 10653 CaSK18   | CELL CYC translation regulator activity         |
| CA3825 | 1.0 | 0.9 | 0.9 | 1.0 | IPF10654 | complemer D-arabinitol dehydroge orf19.5763     | 10654 IPF10654 | ENERGY SUBCELLULAR LOCALISATION                 |
| CA3826 | 1.0 | 1.0 | 1.0 | 0.8 | IPF20148 | 12466008..unknown function orf19.5762           | 20148 IPF20148 | No significant S.c. match                       |
| CA3827 | 0.2 | 0.3 | 0.3 | 0.4 | IPF10662 | 12469047..unknown function orf19.5760           | 10662 IPF10662 | No significant S.c. match                       |
| CA3828 | 2.1 | 1.3 | 1.2 | 1.2 | SNQ2     | 12471725..multidrug resistance pr orf19.5759    | 13913 CaSNQ2   | Lipid fatty-ε transporter activity              |
| CA3829 | 2.1 | 1.6 | 1.5 | 1.1 | PPQ1     | complemer phosphoprotein phosph orf19.5758      | 13917 CaPPQ1   | PROTEIN SYNTHESIS                               |
| CA3830 | 0.9 | 1.0 | 1.2 | 1.0 | SSF1     | 12479848..mating protein (by hor orf19.6589     | 8195 CaSSF1    | CELL FAT{RNA binding                            |
| CA3831 | 1.2 | 1.0 | 0.9 | 0.8 | VMA22    | complemer vacuolar ATPase asse orf19.6590       | 8194 CaVMA22   | PROTEIN {chaperone activity                     |
| CA3832 | 1.3 | 1.1 | 1.0 | 0.9 | IPF8193  | complemer unknown function orf19.6591           | 8193 IPF8193   | Metabolism hydrolase activity                   |
| CA3833 | 1.1 | 1.0 | 1.1 | 0.9 | IPF8192  | complemer unknown function orf19.6592           | 8192 IPF8192   | No significant S.c. match                       |
| CA3834 | 1.0 | 0.7 |     | 1.2 | PLB3     | 12488494..phospholipase B (by hor orf19.6594    | 8186 CaPLB3    | Lipid fatty-ε hydrolase activity                |
| CA3835 | 0.7 | 1.0 | 1.0 | 1.0 | RTA4     | 12492448..Protein involved in 7-ai orf19.6595   | 8181 CaRTA4    | UNCLASSIFIED PROTEINS                           |
| CA3836 | 1.4 | 1.4 | 0.9 | 1.0 | IPF8179  | 12494486..putative esterase (by hor orf19.6596  | 8179 IPF8179   | Lipid fatty-ε hydrolase activity                |
| CA3838 | 0.7 | 1.0 | 0.9 | 1.0 | LAS17    | complemer actin assembly factor ( orf19.6598    | 12743 CaLAS17  | CELL CYC protein binding                        |
| CA3839 | 1.2 | 1.0 | 0.9 | 0.9 | IPF12744 | 12499739..unknown function orf19.6600           | 12744 IPF12744 | No significant S.c. match                       |
| CA3840 | 0.8 | 0.9 | 0.8 | 0.8 | IPF12745 | 12501409..unknown function orf19.6600           | 12745 IPF12745 | CLASSIFIC molecular_function unknown            |
| CA3841 | 0.9 | 0.9 | 0.9 | 0.9 | IPF16640 | 12503398..unknown function orf19.6601           | 16640 IPF16640 | No significant S.c. match                       |
| CA3842 | 0.2 | 0.9 | 0.6 | 1.5 | YKE2.3   | 12505413..Gim complex component, 3-prime ei     | 7948 CaYKE2.3  | PROTEIN {protein binding                        |
| CA3843 | 1.2 | 1.1 | 0.9 | 1.0 | IPF7947  | complemer unknown function orf19.6602           | 7947 IPF7947   | UNCLASSI molecular_function unknown             |
| CA3844 | 0.6 | 1.0 | 0.9 | 1.2 | IPF7945  | 12508388..unknown function orf19.6604           | 7945 IPF7945   | No significant S.c. match                       |
| CA3845 | 0.6 | 0.9 | 1.0 | 1.2 | IPF7944  | complemer unknown function orf19.6605           | 7944 IPF7944   | UNCLASSI molecular_function unknown             |
| CA3846 | 0.9 | 1.2 | 1.1 | 1.0 | IPF7943  | 12510810..unknown function orf19.6606           | 7943 IPF7943   | No significant S.c. match                       |
| CA3847 | 0.9 | 1.4 | 1.0 | 1.1 | IPF7942  | 12513243..NADH-ubiquinone oxic orf19.6607       | 7942 IPF7942   | No significant S.c. match                       |
| CA3848 | 0.2 | 0.5 | 0.4 | 1.2 | IPF7940  | 12515029..unknown function orf19.6608           | 7940 IPF7940   | No significant S.c. match                       |
| CA3849 | 0.9 | 1.1 | 1.2 | 0.9 | IPF7938  | 12517774..similar to Saccharomy orf19.6610      | 7938 IPF7938   | SUBCELLL structural molecule activity           |
| CA3850 | 1.1 | 1.0 | 0.9 | 1.0 | IPF7932  | 12520919..similar to Saccharomy orf19.6612      | 7932 IPF7932   | ENERGY {molecular_function unknown              |
| CA3851 | 0.7 | 1.0 | 0.5 | 0.9 | CTA21    | 12533211..transcriptional activatic orf19.6112  | 10779 CaCTA21  | No significant S.c. match                       |
| CA3852 | 1.7 | 0.7 | 1.1 | 0.9 | TUP1     | 12534656..general transcription re orf19.6109   | 4657 CaTUP1    | TRANSCR transcription regulator activity        |
| CA3853 | 1.2 | 0.6 | 0.9 | 1.0 | MVD1.3   | 12536361..mevalonate pyrophosp orf19.6105       | 4652 CaMVD1.3  | Lipid fatty-ε lyase activity                    |
| CA3854 | 0.8 | 0.6 | 0.9 | 1.0 | IPF4649  | complemer unknown Function orf19.6102           | 4649 IPF4649   | CELL CYC transcription regulator activity       |
| CA3855 | 0.9 | 1.1 | 1.0 | 1.0 | IPF4645  | 12538088..unknown Function orf19.6103           | 4645 IPF4645   | UNCLASSI molecular_function unknown             |
| CA3856 | 0.9 | 1.1 | 1.2 | 1.0 | IPF4641  | complemer similar to Saccharomy orf19.6100      | 4641 IPF4641   | Lipid fatty-ε transferase activity              |
| CA3857 | 0.8 | 0.8 | 1.0 | 1.2 | CCT8     | 12539831..component of chapero orf19.6099       | 4639 CaCCT8    | PROTEIN {chaperone activity                     |
| CA3858 | 1.0 | 0.8 | 0.9 | 1.2 | TRP1     | complemer phosphoribosylanthran orf19.6096      | 4635 CaTRP1    | Amino acid isomerase activity                   |
| CA3859 | 0.9 | 1.2 | 1.0 | 1.1 | IPF4632  | complemer similar to Saccharomy orf19.6094      | 4632 IPF4632   | CELLULAF molecular_function unknown             |
| CA3860 | 1.2 | 1.5 | 1.3 | 1.2 | KEL1     | 12544763..involved in cell fusion orf19.6092    | 4628 CaKEL1    | REGULATI molecular_function unknown             |
| CA3861 | 1.2 | 1.3 | 1.0 | 0.9 | RIM8     | complemer regulator of PH respon orf19.6091     | 4622 CaRIM8    | UNCLASSIFIED PROTEINS                           |
| CA3862 | 1.2 | 1.0 | 1.1 | 0.9 | NSR1     | complemer nuclear localization sec orf19.6090   | 4616 CaNSR1    | TRANSCR RNA binding                             |
| CA3863 | 0.8 | 1.0 | 1.0 | 1.2 | LEU41    | 12552360..2-isopropylmalalate sy orf19.6086     | 4611 CaLEU41   | Amino acid transferase activity                 |
| CA3864 | 0.3 | 1.1 | 0.7 | 1.5 | RPL16A   | 12554335..ribosomal protein (by hor orf19.6085  | 4609 CaRPL16A  | PROTEIN {RNA binding                            |
| CA3865 | 1.0 | 1.0 | 1.0 | 0.8 | IPF4608  | complemer unknown Function orf19.6084           | 4608 IPF4608   | No significant S.c. match                       |
| CA3866 | 1.2 | 0.9 | 1.0 | 0.8 | IPF4606  | complemer unknown Function orf19.6082           | 4606 IPF4606   | C-compour molecular_function unknown            |
| CA3867 | 0.8 | 0.9 | 1.1 | 1.1 | PHR2     | 12560345..pH-regulated protein 2 orf19.13500    | 4604 CaPHR2    | Lipid fatty-ε transferase activity              |
| CA3868 | 0.7 | 0.9 | 1.3 | 1.0 | CCT1     | complemer component of chapero orf19.401        | 8832 CaCCT1    | PROTEIN {chaperone activity                     |
| CA3869 | 0.9 | 1.3 | 1.0 | 1.2 | IPF8831  | 12568747..unknown function orf19.400            | 8831 IPF8831   | No significant S.c. match                       |
| CA3870 | 0.8 | 1.2 | 0.9 | 1.2 | YPK1     | 12570292..ser/thr-specific protein orf19.399    | 8830 CaYPK1    | CELL CYC protein kinase activity                |
| CA3871 | 1.4 | 1.1 | 1.0 | 0.9 | IPF8828  | complemer unknown function orf19.398            | 8828 IPF8828   | No significant S.c. match                       |
| CA3872 | 1.0 | 1.0 | 1.3 | 0.9 | MRPL28   | 12573281..mitochondrial ribosom: orf19.397      | 8826 CaMRPL28  | PROTEIN {structural molecule activity           |
| CA3873 | 1.2 | 1.0 | 0.8 | 0.8 | IPF8825  | complemer unknown function orf19.396            | 8825 IPF8825   | UNCLASSI molecular_function unknown             |
| CA3874 | 0.3 | 0.7 | 0.5 | 0.3 | ENO1     | 12575400..Enolase I (2-phosphog orf19.395       | 14429 CaENO1   | C-compour lyase activity                        |
| CA3875 | 0.6 | 1.1 | 1.0 | 1.0 | IPF14430 | complemer putative kynureninase orf19.8024      | 14430 IPF14430 | Amino acid hydrolase activity                   |
| CA3876 | 1.2 | 0.9 | 1.0 | 0.9 | APS3     | 12578650..AP-3 complex subunit, orf19.8023      | 7291 CaAPS3    | CELLULAF molecular_function unknown             |
| CA3877 | 0.8 | 1.0 | 0.8 | 1.0 | CBP4     | complemer Ubiquinol--cytochrome orf19.392       | 7290 CaCBP4    | ENERGY {molecular_function unknown              |
| CA3878 | 1.8 | 1.1 | 1.1 | 0.9 | IPF7289  | 12580573..similar to Saccharomy orf19.391       | 7289 IPF7289   | Lipid fatty-ε transcription regulator activity  |
| CA3879 | 0.7 | 0.7 | 0.9 | 1.2 | CDC42    | 12583487..Cell Division Control orf19.390       | 7286 CaCDC42   | CELL CYC signal transducer activity             |
| CA3880 | 0.8 | 1.1 | 0.9 | 1.2 | CAF16    | complemer ABC ATPase (by hom orf19.388          | 7283 CaCAF16   | TRANSCR transporter activity,hydrolase activity |
| CA3881 | 0.8 | 1.1 | 1.1 | 1.1 | GCR3     | complemer Large subunit of the nu orf19.387     | 7281 CaGCR3    | TRANSCR RNA binding                             |
| CA3882 | 0.7 |     | 0.9 | 1.1 | IPF7279  | 12589543..putative cobalamin-de; orf19.386      | 7279 IPF7279   | UNCLASSI transferase activity                   |

|        |     |     |     |     |            |                                               |             |       |            |                                                                                                             |
|--------|-----|-----|-----|-----|------------|-----------------------------------------------|-------------|-------|------------|-------------------------------------------------------------------------------------------------------------|
| CA3883 | 1.1 | 0.7 | 1.0 | 1.1 | GCV2       | 12591452..Glycine decarboxylase               | orf19.8015  | 19789 | CaGCV2     | Amino acid oxidoreductase activity                                                                          |
| CA3884 | 1.0 | 1.2 | 0.9 | 1.1 | IPF6367    | 12595057..unknown function                    | orf19.8014  | 6367  | IPF6367    | UNCLASSI molecular_function unknown                                                                         |
| CA3885 | 1.3 | 1.0 | 0.8 | 1.2 | IPF19790   | 12598744..unknown function                    | orf19.5095  | 19790 | IPF19790   | Lipid fatty-acid and isoprenoid metabolism                                                                  |
| CA3886 | 1.4 | 1.1 | 1.3 | 1.1 | IPF12963   | 12605161..ubiquitin-mediated prot             | orf19.5094  | 12963 | IPF12963   | PROTEIN FATE [folding modification destination]                                                             |
| CA3887 | 1.8 | 0.9 | 1.0 | 0.9 | IPF12964   | complemer similar to Saccharomy               | orf19.5093  | 12964 | IPF12964   | CELL CYC protein binding                                                                                    |
| CA3888 | 0.9 | 0.8 | 1.0 | 0.8 | IPF12967   | 12608994..unknown function                    | orf19.5092  | 12967 | IPF12967   | No significant S.c. match                                                                                   |
| CA3889 | 1.3 | 1.0 | 1.0 | 0.9 | TAD3       | complemer tRNA-specific adenosin              | orf19.5090  | 12969 | CaTAD3     | TRANSCR hydrolase activity                                                                                  |
| CA3890 | 0.9 | 1.2 | 0.8 | 1.2 | TERT2      | 12610665..telomerase reverse tra              | orf19.5089  | 19791 | CaTERT2    | CELL CYC DNA binding,nucleotidyltransferase activity                                                        |
| CA3891 | 1.2 | 1.1 | 1.0 | 1.1 | BUD6       | complemer bud site selection prote            | orf19.5087  | 8707  | CaBUD6     | CELL FATIprotein binding                                                                                    |
| CA3892 | 1.3 | 1.0 | 0.9 | 1.0 | PSE1       | complemer karyopherin-beta prote              | orf19.5085  | 8712  | CaPSE1     | CELLULAFprotein binding                                                                                     |
| CA3893 | 0.6 | 1.1 | 0.9 | 1.1 | FUN11      | complemer putative GTP-binding f              | orf19.5083  | 8715  | CaFUN11    | UNCLASSI molecular_function unknown                                                                         |
| CA3894 | 1.0 | 1.1 | 1.2 | 1.0 | YIF2       | 12621274..general translation fact            | orf19.5081  | 8722  | CaYIF2     | PROTEIN ttranslation regulator activity                                                                     |
| CA3895 | 1.4 | 1.1 | 1.3 | 1.1 | CDR4       | complemer Multidrug resistance pr             | orf19.5079  | 10349 | CaCDR4     | Lipid fatty-acid and isoprenoid metabolism """"CELL RESCUE DEFENSE AND VIRULENCE ""REGULATION OF/INTERACTIO |
| CA3896 | 2.0 | 1.4 | 1.3 | 1.1 | IPF10339   | complemer unknown function                    | orf19.5077  | 10339 | IPF10339   | No significant S.c. match                                                                                   |
| CA3897 | 0.5 | 0.4 | 0.6 | 0.7 | PFY1       | complemer BINDS TO ACTIN                      | orf19.5076  | 16724 | CaPFY1     | CELL FATIprotein binding                                                                                    |
| CA3898 | 0.9 | 1.1 | 1.2 | 0.9 | UBA2       | complemer ubiquitin-activating -like          | orf19.5074  | 10088 | CaUBA2     | TRANSCRIPTION ""PROTEIN FATE [folding modification destination] ""SUBCELLULAR LOCALISATION                  |
| CA3899 | 0.2 | 0.5 | 0.5 | 0.8 | DPM1       | complemer dolichol-phosphate (be              | orf19.5073  | 10089 | CaDPM1     | C-compour transferase activity                                                                              |
| CA3900 | 1.5 | 2.2 | 1.2 | 2.3 | IPF10092   | complemer unknown function                    | orf19.5071  | 10092 | IPF10092   | UNCLASSI molecular_function unknown                                                                         |
| CA3901 | 0.9 | 0.8 | 1.1 | 1.0 | IPF3282.3f | 12643207..hexose transporter, 3-prime end (by | orf19.4401  | 14892 | IPF3282.3f | C-compound and carbohydrate metabolism CELLULAR TRANSPORT AND TRANSPORT MECHANISMS SUBCELLULAR LO           |
| CA3902 | 0.9 | 1.0 | 1.1 | 1.0 | YVH1       | 12643889..protein tyrosine phosph             | orf19.4401  | 14891 | CaYVH1     | CELL CYC protein phosphatase activity                                                                       |
| CA3903 | 0.8 | 0.9 | 1.1 | 0.9 | IPF14890   | complemer unknown function                    | orf19.4400  | 14890 | IPF14890   | No significant S.c. match                                                                                   |
| CA3904 | 1.5 | 1.1 | 1.1 | 0.7 | IPF14888   | complemer unknown function                    | orf19.11877 | 14888 | IPF14888   | PROTEIN t molecular_function unknown                                                                        |
| CA3905 | 0.6 | 1.0 | 0.9 | 1.1 | IPF19792   | complemer unknown function                    | orf19.11876 | 19792 | IPF19792   | UNCLASSI molecular_function unknown                                                                         |
| CA3906 | 1.3 | 1.2 | 1.1 | 0.8 | IPF20149   | complemer unknown function                    | orf19.11874 | 20149 | IPF20149   | ENERGY molecular_function unknown                                                                           |
| CA3907 | 1.3 | 0.8 | 1.0 | 1.1 | IPF3304    | 12651099..similar to Saccharomy               | orf19.11873 | 3304  | IPF3304    | SUBCELLL protein binding                                                                                    |
| CA3908 | 1.1 | 1.0 | 1.0 | 0.9 | IPF3301    | complemer unknown function                    | orf19.4394  | 3301  | IPF3301    | C-compound and carbohydrate metabolism ""PROTEIN FATE [folding modification destination] ""                 |
| CA3909 | 4.9 | 2.6 | 7.1 | 3.5 | CIT1.EXO   | complemer Citrate synthase, exon              | orf19.4393  | 3299  | CaCIT1.ex  | C-compour transferase activity                                                                              |
| CA3910 | 0.6 | 1.1 | 1.0 | 1.0 | IPF3293    | complemer unknown function                    | orf19.4392  | 3293  | IPF3293    | UNCLASSI molecular_function unknown                                                                         |
| CA3911 | 1.4 | 0.9 | 0.7 | 1.2 | IPF3292    | complemer unknown function                    | orf19.4391  | 3292  | IPF3292    | UNCLASSIFIED PROTEINS                                                                                       |
| CA3912 | 1.2 | 1.0 | 1.4 | 0.8 | IPF3288    | complemer unknown function                    | orf19.4390  | 3288  | IPF3288    | No significant S.c. match                                                                                   |
| CA3913 | 1.0 | 1.0 | 1.0 | 1.2 | IPF3283    | complemer unknown function                    | orf19.4388  | 3283  | IPF3283    | TRANSCR transcription regulator activity                                                                    |
| CA3914 | 0.7 | 0.7 | 1.0 | 1.0 | IPF3282    | complemer hexose transporter (by              | orf19.4386  | 3282  | IPF3282    | C-compound and carbohydrate metabolism CELLULAR TRANSPORT AND TRANSPORT MECHANISMS SUBCELLULAR LO           |
| CA3915 | 0.6 | 0.9 | 1.0 | 1.0 | IPF3277    | complemer unknown function                    | orf19.4384  | 3277  | IPF3277    | No significant S.c. match                                                                                   |
| CA3916 | 1.1 | 0.9 | 0.9 | 1.3 | IPF3274    | complemer Unknown function                    | orf19.4383  | 3274  | IPF3274    | UNCLASSI molecular_function unknown                                                                         |
| CA3917 | 0.6 | 0.9 | 0.9 | 1.0 | IPF3273    | complemer similar to Saccharomy               | orf19.4382  | 3273  | IPF3273    | CELLULAFprotein binding                                                                                     |
| CA3918 | 1.5 | 1.0 | 0.9 | 1.1 | VTC2       | complemer putative polyphosphate              | orf19.4381  | 3271  | CaVTC2     | Phosphate molecular_function unknown                                                                        |
| CA3919 | 1.0 | 1.2 | 1.0 | 1.0 | IFC5       | complemer unknown function                    | orf19.5121  | 9728  | CaIFC5     | TRANSPORT FACILITATION                                                                                      |
| CA3920 | 1.0 | 1.0 | 1.2 | 1.0 | SDS24      | complemer Similar to S. cerevisiae            | orf19.5118  | 6359  | CaSDS24    | PROTEIN t molecular_function unknown                                                                        |
| CA3921 | 0.4 | 0.9 | 1.1 | 0.4 | OLE1       | 12697174..Stearoyl-CoA desatura               | orf19.5117  | 6353  | CaOLE1     | Lipid fatty-z oxidoreductase activity                                                                       |
| CA3922 | 1.2 | 0.9 | 1.1 | 0.8 | GRD19      | 12700546..Probable golgi membr                | orf19.5114  | 6349  | CaGRD19    | PROTEIN t protein binding                                                                                   |
| CA3923 | 1.3 | 2.1 | 4.8 | 0.6 | ADH2       | 12702654..alcohol dehydrogenase               | orf19.5113  | 16784 | CaADH2     | C-compour oxidoreductase activity                                                                           |
| CA3924 | 0.5 | 0.5 | 0.7 | 0.8 | TKL1       | complemer transketolase 1                     | orf19.5112  | 13260 | CaTKL1     | Amino acid transferase activity                                                                             |
| CA3925 | 1.3 | 1.1 | 1.1 | 1.1 | IPF13257   | complemer unknown function                    | orf19.5110  | 13257 | IPF13257   | No significant S.c. match                                                                                   |
| CA3926 | 0.9 | 1.3 | 1.1 | 1.0 | IPF16198   | complemer possible regulatory pro             | orf19.5107  | 16198 | IPF16198   | TRANSCR RNA binding                                                                                         |
| CA3927 | 1.3 | 1.1 | 1.0 | 1.1 | DIP2       | 12713649..beta transducin                     | orf19.5106  | 14262 | CaDIP2     | CELL CYC RNA binding                                                                                        |
| CA3928 | 1.1 | 0.8 | 1.1 | 1.3 | GAL11      | 12719361..DNA-directed RNA pol                | orf19.5105  | 12729 | CaGAL11    | C-compour transcription regulator activity                                                                  |
| CA3930 | 0.9 | 0.7 | 1.0 | 0.9 | LPT1.EXO   | 12723309..protein-tyrosine-phosp              | orf19.5104  | 12722 | CaLPT1.ex  | CLASSIFICprotein phosphatase activity                                                                       |
| CA3931 | 1.2 | 1.0 | 1.2 | 1.1 | IPF12719   | 12725059..unknown function                    | orf19.5103  | 12719 | IPF12719   | ENERGY                                                                                                      |
| CA3932 | 1.1 | 0.8 | 1.0 | 1.1 | IPF20150   | complemer unknown function                    | orf19.9561  | 20150 | IPF20150   | No significant S.c. match                                                                                   |
| CA3933 | 1.2 | 1.0 | 1.1 | 1.0 | IPF18281   | 12730007..similar to Saccharomy               | orf19.9560  | 18281 | IPF18281   | SUBCELLL protein binding                                                                                    |
| CA3934 | 1.4 | 0.9 | 1.0 | 0.8 | IPF17119   | 12731697..unknown function                    | orf19.2008  | 17119 | IPF17119   | UNCLASSI molecular_function unknown                                                                         |
| CA3935 | 1.1 | 1.0 | 0.9 | 0.8 | IPF14688   | complemer unknown function                    | orf19.2007  | 14688 | IPF14688   | CELLULAF molecular_function unknown                                                                         |
| CA3936 | 0.8 | 0.9 | 0.9 | 1.0 | COX17      | 12736721..cysteine-rich cytoplasmic protein(b | orf19.9557  | 14687 | CaCOX17    | ENERGY " transporter activity                                                                               |
| CA3937 | 0.7 | 1.2 | 1.0 | 1.2 | IPF14686   | complemer unknown function                    | orf19.9557  | 14686 | IPF14686   | UNCLASSI molecular_function unknown                                                                         |
| CA3938 | 0.9 | 1.5 | 1.0 | 1.4 | IPF4764    | complemer unknown Function                    | orf19.9556  | 4764  | IPF4764    | C-compour protein phosphatase activity                                                                      |
| CA3939 | 1.0 | 1.2 | 1.9 | 1.1 | HNM1       | complemer Choline permease (by                | orf19.9554  | 4757  | CaHNM1     | CELLULAR TRANSPORT AND TRANSPORT MECHANISMS SUBCELLULAR LOCALISATION TRANSPORT FACILITATION                 |
| CA3940 | 0.9 | 1.1 | 1.0 | 1.1 | NIC96      | 12748259..nuclear pore protein (b             | orf19.9553  | 4755  | CaNIC96    | CELLULAF structural molecule activity                                                                       |
| CA3941 | 0.8 | 0.9 | 1.0 | 0.8 | IPF4754    | 12751373..unknown Function                    | orf19.2001  | 4754  | IPF4754    | No significant S.c. match                                                                                   |
| CA3942 | 0.8 | 0.9 | 1.0 | 1.0 | CHL1       | complemer protein of the DEAH bc              | orf19.2000  | 4753  | CaCHL1     | CELL CYC DNA binding,helicase activity                                                                      |
| CA3943 | 0.7 | 1.0 | 1.1 | 0.9 | IPF4751    | 12754865..unknown Function                    | orf19.1999  | 4751  | IPF4751    | No significant S.c. match                                                                                   |
| CA3944 | 0.8 | 0.8 | 0.9 | 1.0 | IPF4750    | 12755828..unknown Function                    | orf19.1998  | 4750  | IPF4750    | CELL CYCLE AND DNA PROCESSING                                                                               |
| CA3945 | 0.9 | 0.8 | 1.2 | 0.8 | CHA12      | 12758897..L-serine/L-threonine de             | orf19.9548  | 4749  | CaCHA12    | Amino acid metabolism                                                                                       |
| CA3946 | 0.5 | 0.9 | 0.9 | 1.0 | MNN2       | complemer Golgi alpha-1,2-mann                | orf19.9547  | 4742  | CaMNN2     | CELL FATE                                                                                                   |
| CA3947 | 1.5 | 1.1 | 1.1 | 0.9 | IPF14768   | 12766735..unknown function                    | orf19.1994  | 14768 | IPF14768   | UNCLASSIFIED PROTEINS                                                                                       |
| CA3948 | 1.1 | 1.2 | 1.2 | 1.1 | RPN9       | 12769144..26S proteasome regul                | orf19.1993  | 14766 | CaRPN9     | PROTEIN t peptidase activity                                                                                |
| CA3949 | 1.3 | 1.0 | 1.1 | 0.9 | SIR21      | complemer regulatory protein (by              | orf19.9544  | 17303 | CaSIR21    | TRANSCRIPTION CELL FATE                                                                                     |
| CA3950 | 0.9 | 0.6 | 0.7 | 0.9 | PTM1       | 12773621..Possibly involved in the            | orf19.9542  | 19793 | CaPTM1     | ENERGY molecular_function unknown                                                                           |
| CA3951 | 1.0 | 1.1 | 0.9 | 0.8 | VAC7.3     | 12796222..Vacuolar protein, 3-pri             | orf19.1409  | 6717  | CaVAC7.3   | PROTEIN t enzyme regulator activity                                                                         |
| CA3952 | 1.4 | 1.0 | 1.1 | 0.8 | IPF6716    | complemer Phenylacetate 2-hydro               | orf19.1411  | 6716  | IPF6716    | Lipid fatty-acid and isoprenoid metabolism """"CELL RESCUE DEFENSE AND VIRULENCE ""SUBCELLULAR LOCALISATION |
| CA3953 | 1.0 | 0.9 | 1.2 | 1.0 | IPF6714    | complement(12800838..12801470                 | orf19.1412  | 6714  | IPF6714    | No significant S.c. match                                                                                   |
| CA3954 | 0.7 | 0.9 | 1.2 | 1.1 | YFH1       | 12801702..Regulates mitochondri               | orf19.1413  | 6713  | CaYFH1     | REGULATIenzyme regulator activity                                                                           |

|        |     |     |     |     |            |                                                |       |            |                                                                                |
|--------|-----|-----|-----|-----|------------|------------------------------------------------|-------|------------|--------------------------------------------------------------------------------|
| CA3955 | 0.8 | 1.0 | 1.0 | 1.0 | IPF6712.5f | 12802958..unknown function, 5-pr orf19.1414    | 6712  | IPF6712.5f | UNCLASSIFIED PROTEINS                                                          |
| CA3956 | 0.8 | 0.9 | 0.9 | 1.0 | IPF6712.3f | 12803598..unknown function, 3-prime end        | 6710  | IPF6712.3f | No significant S.c. match                                                      |
| CA3957 | 1.0 | 0.8 | 1.0 | 1.2 | RBT2       | complemer Repressed by TUP1 pr orf19.1415      | 6709  | CaRBT2     | REGULATION OF/INTERACTION WITH CELLULAR ENVIRONMENT Other virulence attributes |
| CA3958 | 1.0 | 1.0 | 1.2 | 1.1 | COX11      | complemer cytochrome-c oxidase orf19.1416      | 11240 | CaCOX11    | Metabolism molecular_function unknown                                          |
| CA3959 | 0.8 | 1.1 | 1.0 | 1.2 | IPF11236.3 | complemer similar to Saccharomy orf19.1418     | 11238 | IPF11236.3 | CELLULAR TRANSPORT AND TRANSPORT MECHANISMS SUBCELLULAR LOCALISATION           |
| CA3960 | 1.2 | 0.9 | 1.0 | 0.8 | IPF11236.5 | complemer similar to Saccharomy orf19.1419     | 11236 | IPF11236.5 | CELLULAFprotein binding                                                        |
| CA3961 | 1.0 | 1.0 | 1.1 | 1.1 | IPF11235   | 12814339..unknown function orf19.1420          | 11235 | IPF11235   | UNCLASSI molecular_function unknown                                            |
| CA3962 | 1.4 | 1.1 | 0.9 | 0.9 | IPF11234   | complemer similar to saccharomy orf19.1421     | 11234 | IPF11234   | Nitrogen ar hydrolase activity                                                 |
| CA3963 | 1.0 | 1.2 | 1.3 | 1.1 | IPF11233   | 12816247..similar to Saccharomy orf19.1422     | 11233 | IPF11233   | CONTROL hydrolase activity                                                     |
| CA3964 | 1.6 | 1.1 | 1.2 | 1.0 | IPF9370    | complemer unknown function orf19.1424          | 9370  | IPF9370    | UNCLASSI molecular_function unknown                                            |
| CA3965 | 0.5 | 0.9 | 1.0 | 1.1 | IPF9375    | 12822546..unknown function orf19.1426          | 9375  | IPF9375    | UNCLASSIFIED PROTEINS                                                          |
| CA3966 | 1.2 | 0.9 | 1.1 | 0.8 | IPF9376    | complemer unknown function orf19.1427          | 9376  | IPF9376    | TRANSPO transporter activity                                                   |
| CA3967 | 0.9 | 1.1 | 1.2 | 0.9 | IPF9377    | complemer unknown function orf19.1428          | 9377  | IPF9377    | No significant S.c. match                                                      |
| CA3968 | 0.9 | 1.0 | 1.1 | 0.9 | IPF9378    | 12827859..similar to Saccharomy orf19.1429     | 9378  | IPF9378    | CELL CYC molecular_function unknown                                            |
| CA3969 | 1.6 | 1.0 | 1.0 | 0.9 | IPF9379    | 12829925..unknown function orf19.1430          | 9379  | IPF9379    | No significant S.c. match                                                      |
| CA3970 | 1.3 | 1.2 | 1.0 | 1.3 | IPF6497    | complemer unknown function orf19.1542          | 6497  | IPF6497    | C-compour DNA binding                                                          |
| CA3971 | 0.5 | 1.1 | 0.8 | 0.9 | IPF6498    | complemer unknown function orf19.1543          | 6498  | IPF6498    | No significant S.c. match                                                      |
| CA3972 | 0.4 | 1.1 | 1.0 | 0.9 | IPF6504    | 12839665..unknown function orf19.9118          | 6504  | IPF6504    | UNCLASSI molecular_function unknown                                            |
| CA3973 | 0.8 | 0.8 | 1.3 | 1.0 | IPF6505    | complemer unknown function orf19.1545          | 6505  | IPF6505    | UNCLASSI molecular_function unknown                                            |
| CA3974 | 0.8 | 1.0 | 1.0 | 1.0 | IPF6507    | 12841350..unknown function orf19.1546          | 6507  | IPF6507    | UNCLASSI molecular_function unknown                                            |
| CA3975 | 0.8 | 1.0 | 1.0 | 0.8 | IPF20152   | complemer unknown function orf19.1547          | 20152 | IPF20152   | UNCLASSI molecular_function unknown                                            |
| CA3976 | 1.1 | 0.8 | 1.0 | 1.0 | SNU23      | 12843206..RNA binding zinc finge orf19.1548    | 15310 | CaSNU23    | TRANSCR RNA binding                                                            |
| CA3977 | 1.2 | 1.1 | 1.2 | 1.0 | IPF20153   | 12844359..unknown function orf19.1549          | 20153 | IPF20153   | No significant S.c. match                                                      |
| CA3978 | 0.6 | 1.0 | 1.0 | 1.4 | CPR3       | complemer cyclophilin (peptidylpro orf19.1552  | 20154 | CaCPR3     | PROTEIN FATE [folding modification destination] ""SUBCELLULAR LOCALISATION     |
| CA3979 | 1.1 | 1.2 | 1.1 | 1.3 | ENT3.3F    | complemer putative endocytosis ar orf19.1553   | 7127  | CaENT3.3f  | SUBCELLL protein binding                                                       |
| CA3982 | 1.6 | 1.1 | 1.2 | 0.8 | SAC3       | complemer Leucine permease trar orf19.9129     | 7130  | CaSAC3     | Amino acid protein binding                                                     |
| CA3983 | 1.0 | 1.1 | 0.9 | 1.1 | IPF7133.3  | complemer unknown function, 3-pr orf19.9130    | 7133  | IPF7133.3  | UNCLASSI molecular_function unknown                                            |
| CA3984 | 0.9 | 1.0 | 1.1 | 1.3 | HOM2       | complemer Aspartate-semialdehyc orf19.9132     | 7136  | CaHOM2     | Amino acid oxidoreductase activity                                             |
| CA3985 | 1.1 | 0.9 | 0.9 | 0.8 | POB3       | 12855324..Binds DNA polymerast orf19.1560      | 7138  | CaPOB3     | CELL CYC DNA binding                                                           |
| CA3986 | 1.2 | 1.6 | 1.3 | 1.0 | IPF7141    | 12858766..unknown function orf19.1562          | 7141  | IPF7141    | No significant S.c. match                                                      |
| CA3987 | 1.7 | 1.1 | 1.2 | 0.9 | ECM3       | 12860734..Involved in cell wall bic orf19.1563 | 7144  | CaECM3     | CONTROL hydrolase activity                                                     |
| CA3988 | 0.7 | 1.3 | 1.4 | 1.1 | IPF7145    | 12862774..unknown function orf19.1564          | 7145  | IPF7145    | UNCLASSI molecular_function unknown                                            |
| CA3989 | 1.4 | 1.1 | 1.0 | 1.0 | IPF7147    | complemer unknown function orf19.1565          | 7147  | IPF7147    | UNCLASSIFIED PROTEINS                                                          |
| CA3990 | 1.7 | 1.2 | 1.1 | 0.9 | IPF14782   | 12865488..beta-transducin (by ho orf19.1566    | 14782 | IPF14782   | CLASSIFIC molecular_function unknown                                           |
| CA3991 | 1.2 | 1.0 | 1.2 | 0.8 | VAM6.5F    | 12868640..Vacuolar carboxypepti orf19.1567     | 14783 | CaVAM6.5f  | No significant S.c. match                                                      |
| CA3992 | 1.3 | 1.2 | 1.1 | 1.2 | VAM6.3F    | 12870299..Vacuolar carboxypepti orf19.1568     | 19794 | CaVAM6.3f  | PROTEIN I enzyme regulator activity                                            |
| CA3993 | 1.2 | 1.2 | 0.9 | 1.0 | IPF8275    | complemer unknown function orf19.9142          | 8275  | IPF8275    | UNCLASSI molecular_function unknown                                            |
| CA3994 | 1.1 | 0.7 | 1.1 |     | ERG7       | 12875947..lanosterol synthase orf19.9143       | 8270  | CaERG7     | Lipid fatty-ε isomerase activity                                               |
| CA3995 | 1.0 |     | 1.0 | 1.1 | IPF11615.3 | 12879487..RNA-binding protein (by homology)    | 10438 | IPF11615.3 | CLASSIFICATION NOT YET CLEAR-CUT                                               |
| CA3996 | 0.6 | 1.1 | 0.9 | 1.2 | IPF10440   | 12879925..unknown function orf19.1643          | 10440 | IPF10440   | UNCLASSI peptidase activity                                                    |
| CA3997 | 1.0 | 1.0 | 1.0 | 1.1 | LOC1       | complemer putative double-strand orf19.1642    | 10442 | CaLOC1     | UNCLASSI RNA binding                                                           |
| CA3998 | 0.8 | 1.0 | 1.0 | 1.1 | IPF10443   | 12882405..formamidase-like prote orf19.1641    | 10443 | IPF10443   | No significant S.c. match                                                      |
| CA3999 | 0.7 | 1.1 | 1.0 | 0.9 | IPF10447   | complemer unknown function orf19.1637          | 10447 | IPF10447   | No significant S.c. match                                                      |
| CA4000 | 0.6 | 1.0 | 1.0 | 1.0 | IPF4262    | 12890326..similar to Saccharomy orf19.1636     | 4262  | IPF4262    | REGULATI enzyme regulator activity                                             |
| CA4001 | 1.1 | 0.5 | 0.9 | 1.1 | RPL12      | 12892036..ribosomal protein orf19.1635         | 4260  | CaRPL12    | PROTEIN I structural molecule activity                                         |
| CA4002 | 1.3 | 1.1 | 1.0 | 1.1 | IPF4258    | 12893635..unknown function orf19.1634          | 4258  | IPF4258    | Lipid fatty-acid and isoprenoid metabolism                                     |
| CA4003 | 1.6 | 1.3 | 1.0 | 0.9 | IPF4257    | 12895133..unknown function orf19.1633          | 4257  | IPF4257    | UNCLASSI RNA binding                                                           |
| CA4004 | 0.8 | 1.2 | 1.1 | 0.9 | IPF4256    | complemer unknown function orf19.1632          | 4256  | IPF4256    | UNCLASSIFIED PROTEINS                                                          |
| CA4005 | 1.2 | 0.9 | 0.8 | 0.8 | ERG6       | complemer sterol transmethylase orf19.1631     | 4255  | CaERG6     | Lipid fatty-ε transferase activity                                             |
| CA4006 | 1.0 | 1.2 | 1.0 | 0.9 | IPF4253    | complemer unknown function orf19.1630          | 4253  | IPF4253    | TRANSCR molecular_function unknown                                             |
| CA4007 | 0.8 | 1.0 | 1.1 | 1.1 | LAP41      | complemer aminopeptidase yslc p orf19.1628     | 4250  | CaLAP41    | PROTEIN I peptidase activity                                                   |
| CA4008 | 1.1 | 1.1 | 1.1 | 1.0 | DYS1       | complemer deoxyhypusine syntha: orf19.1626     | 4248  | CaDYS1     | Amino acid transferase activity                                                |
| CA4009 | 0.8 | 1.2 | 1.1 | 1.0 | IPF4247    | complemer unknown function orf19.1625          | 4247  | IPF4247    | No significant S.c. match                                                      |
| CA4010 | 1.5 | 1.1 | 0.8 | 1.1 | MAK10.3    | complemer glucose-repressible pr orf19.1624    | 4245  | CaMAK10.3  | ENERGY transferase activity                                                    |
| CA4011 | 1.0 | 1.1 | 1.1 | 1.0 | IPF4240    | complemer similar to Saccharomy orf19.1622     | 4240  | IPF4240    | CELL CYC molecular_function unknown                                            |
| CA4012 | 0.9 | 0.9 | 0.9 | 0.9 | GPA2       | complemer nucleotide-binding regu orf19.1621   | 4239  | CaGPA2     | CELLULAF hydrolase activity                                                    |
| CA4013 | 0.7 | 1.0 | 0.9 | 1.1 | IPF4234    | complemer unknown function orf19.1620          | 4234  | IPF4234    | No significant S.c. match                                                      |
| CA4014 | 1.4 | 1.2 | 0.7 | 1.0 | CTK1       | complemer probable cell division p orf19.1619  | 4233  | CaCTK1     | TRANSCR protein kinase activity                                                |
| CA4015 | 0.8 | 0.9 | 3.4 | 0.9 | IPF12268   | 12926743..unknown function                     | 12268 | IPF12268   | No significant S.c. match                                                      |
| CA4016 |     | 0.4 | 0.5 | 0.9 | GFA1       | complemer glutamine:fructose-6-p orf19.1618    | 12267 | CaGFA1     | C-compour transferase activity                                                 |
| CA4017 | 1.0 | 0.8 | 1.2 | 1.0 | PBN1       | 12937376..protease by homology orf19.3447      | 5328  | CaPBN1     | PROTEIN I molecular_function unknown                                           |
| CA4018 | 1.4 | 1.0 | 1.0 | 0.8 | MOG1       | complemer Ran-Binding Protein by orf19.3446    | 5327  | CaMOG1     | PROTEIN I protein binding                                                      |
| CA4019 | 1.0 | 0.8 | 1.0 | 1.0 | HOC1       | 12939834..GLYCOSYLTRANSFE orf19.3445           | 5326  | CaHOC1     | C-compour transferase activity                                                 |
| CA4020 | 1.6 | 1.1 | 1.0 | 0.9 | IPF5324    | 12942128..putative transporter (by orf19.3444  | 5324  | IPF5324    | CELL RESCUE DEFENSE AND VIRULENCE ""TRANSPORT FACILITATION                     |
| CA4021 | 1.1 | 0.8 | 1.2 | 1.1 | EBP2       | complemer NADPH dehydrogenas orf19.3442        | 5322  | CaEBP2     | ENERGY                                                                         |
| CA4022 | 1.2 | 1.1 | 2.0 | 1.3 | FRP6       | complemer member of the FRP far orf19.3441     | 5321  | CaFRP6     | C-compound and carbohydrate metabolism                                         |
| CA4023 | 1.6 | 1.2 | 1.1 | 0.8 | FRP5       | complemer member of the FRP far orf19.3440     | 7185  | CaFRP5     | C-compound and carbohydrate metabolism                                         |
| CA4024 | 1.2 | 1.6 | 0.9 | 1.3 | IPF7182    | complemer unknown function orf19.3439          | 7182  | IPF7182    | No significant S.c. match                                                      |
| CA4025 | 1.4 | 0.9 | 0.9 | 0.8 | SCJ1       | complemer Mitochondrial and ER I orf19.3438    | 7178  | CaSCJ1     | PROTEIN I chaperone activity                                                   |
| CA4026 | 1.2 | 1.0 | 1.2 | 0.9 | IPF7175    | 12957963..unknown function orf19.3437          | 7175  | IPF7175    | No significant S.c. match                                                      |
| CA4027 | 1.5 | 1.1 | 1.0 | 0.9 | IPF7174    | 12960250..unknown function orf19.3436          | 7174  | IPF7174    | CELL FATE SUBCELLULAR LOCALISATION PROTEIN ACTIVITY REGULATION                 |

|        |     |     |     |     |                                                        |                                                                                                                |
|--------|-----|-----|-----|-----|--------------------------------------------------------|----------------------------------------------------------------------------------------------------------------|
| CA4028 | 1.2 | 1.0 | 1.0 | 0.9 | IPF7171.3f complemer unknown function, 3-pr orf19.3435 | 7173 IPF7171.3f No significant S.c. match                                                                      |
| CA4029 | 2.0 | 1.1 | 1.5 | 0.8 | IPF7171.5f complemer unknown function, 5-pr orf19.3434 | 7171 IPF7171.5f TRANSCR molecular_function unknown                                                             |
| CA4030 | 0.9 | 0.7 | 0.9 | 1.1 | EBP4 12968102..NADPH dehydrogenas orf19.3433           | 19548 CaEBP4 ENERGY transporter activity                                                                       |
| CA4031 | 1.4 | 0.9 | 1.0 | 0.9 | IPF11077 12970024..membrane transporter orf19.3432     | 11077 IPF11077 CELL RESCUE DEFENSE AND VIRULENCE ""TRANSPORT FACILITATION                                      |
| CA4032 | 0.7 | 0.9 |     | 1.2 | IPF11081 12975776..unknown function                    | 11081 IPF11081 No significant S.c. match                                                                       |
| CA4033 | 1.2 | 0.8 | 1.2 | 1.1 | IPF19795 complemer similar to Saccharomy orf19.3431    | 19795 IPF19795 CELL CYC nucleotidyltransferase activity                                                        |
| CA4034 | 0.8 | 0.7 | 0.9 | 1.0 | HSP31 12983964..heat shock protein (by orf19.11148     | 12039 CaHSP31 CELL RESCUE DEFENSE AND VIRULENCE ""REGULATION OF/INTERACTION WITH CELLULAR ENVIRONMENT SUBCE    |
| CA4035 | 1.2 | 1.1 | 0.9 | 0.8 | IPF12040 12985492..unknown function orf19.3665         | 12040 IPF12040 UNCLASSI molecular_function unknown                                                             |
| CA4036 | 0.7 | 1.2 |     | 1.1 | IPF12042 complemer unknown function orf19.3666         | 12042 IPF12042 UNCLASSI molecular_function unknown                                                             |
| CA4037 | 1.4 | 1.1 | 1.0 | 0.8 | KIP31 12988346..kinesin-related protein orf19.3667     | 12044 CaKIP31 CELL CYCLE AND DNA PROCESSING CELLULAR TRANSPORT AND TRANSPORT MECHANISMS SUBCELLULAR LOCA       |
| CA4038 | 0.8 | 0.2 | 0.8 | 0.5 | HGT12 complemer hexose transporter orf19.3668          | 5315 CaHGT12 C-compound and carbohydrate metabolism TRANSPORT FACILITATION                                     |
| CA4039 | 1.8 | 0.9 | 0.7 | 0.9 | SKS1 complemer serine/threonine kinas orf19.3669       | 5304 CaSKS1 C-compour protein kinase activity                                                                  |
| CA4040 | 0.8 | 0.7 | 0.9 | 1.2 | GAL1 complemer galactokinase orf19.3670                | 5296 CaGAL1 C-compour protein binding                                                                          |
| CA4041 | 0.6 | 0.9 | 1.2 | 1.1 | GAL10 13008284..UDP-glucose 4-epimer orf19.3672        | 5294 CaGAL10 C-compour molecular_function unknown                                                              |
| CA4042 | 0.8 | 0.8 | 0.8 | 0.9 | TRS23 13010516..targeting and fusion of orf19.3673     | 5292 CaTRS23 CELLULAF molecular_function unknown                                                               |
| CA4043 | 1.3 | 1.1 | 1.0 | 0.9 | IPF5291 complemer UDP-glucose 4-epimer orf19.3674      | 5291 IPF5291 C-compound and carbohydrate metabolism SUBCELLULAR LOCALISATION                                   |
| CA4044 | 1.1 | 0.8 | 0.9 | 1.3 | GAL7 13012925..UDP-glucose-hexose- orf19.3675          | 9203 CaGAL7 C-compound and carbohydrate metabolism SUBCELLULAR LOCALISATION                                    |
| CA4045 | 0.9 | 1.1 | 0.9 | 0.9 | ABP140 13014486..putative methyltransfer orf19.3676    | 9204 CaABP140 UNCLASSIFIED PROTEINS                                                                            |
| CA4046 | 1.2 | 1.0 | 1.0 | 1.1 | IPF9205 complemer similar to Saccharomy orf19.3677     | 9205 IPF9205 PROTEIN f molecular_function unknown                                                              |
| CA4047 | 0.6 | 1.1 | 0.9 | 1.0 | IPF9206 13017190..unknown function orf19.3678          | 9206 IPF9206 No significant S.c. match                                                                         |
| CA4048 | 0.8 | 0.8 | 0.8 | 1.2 | IPF9207 complemer unknown function orf19.11163         | 9207 IPF9207 UNCLASSI molecular_function unknown                                                               |
| CA4049 | 1.0 | 1.0 | 0.9 | 1.1 | IPF10482.f 13024198..unknown function, exo orf19.8054  | 10482 IPF10482.e CELL RESCUE DEFENSE AND VIRULENCE ""REGULATION OF/INTERACTION WITH CELLULAR ENVIRONMENT SUBCE |
| CA4050 | 1.1 | 1.1 | 1.2 | 1.3 | IPF10482.f 13024939..unknown function, exo orf19.425   | 20007 IPF10482.e UNCLASSI molecular_function unknown                                                           |
| CA4051 | 0.9 | 1.0 | 1.1 | 0.9 | IPF10231.f 13025769..similar to Saccharomy orf19.426   | 10233 IPF10231.e CELL CYCLE AND DNA PROCESSING TRANSCRIPTION SUBCELLULAR LOCALISATION                          |
| CA4052 | 1.1 | 0.9 | 0.8 | 1.0 | IPF10231.f 13027896..similar to Saccharomy orf19.427   | 10231 IPF10231.e TRANSCR molecular_function unknown                                                            |
| CA4053 | 0.8 | 1.2 | 1.1 | 1.1 | IKS1 13033171..PROBABLE SERINE/1 orf19.428             | 7725 CaIKS1 UNCLASSI molecular_function unknown                                                                |
| CA4054 | 1.5 | 1.2 | 1.0 | 1.2 | TRF4 13035598..Topoisomerase l-relate orf19.429        | 7724 CaTRF4 CELL CYC nucleotidyltransferase activity                                                           |
| CA4055 | 0.9 | 1.3 | 1.0 | 0.9 | YPT522 complemer GTP-binding protein of orf19.430      | 7723 CaYPT522 CELLULAR TRANSPORT AND TRANSPORT MECHANISMS SUBCELLULAR LOCALISATION                             |
| CA4056 | 1.9 | 1.3 | 1.2 | 1.1 | IPF7721 13039034..unknown function orf19.431           | 7721 IPF7721 Amino acid metabolism TRANSCRIPTION SUBCELLULAR LOCALISATION UNCLASSIFIED PROTEINS                |
| CA4057 | 1.0 | 1.2 | 1.0 | 1.1 | IPF7719 13041664..unknown function orf19.432           | 7719 IPF7719 UNCLASSI protein binding                                                                          |
| CA4058 | 1.1 | 1.0 | 1.3 | 1.1 | IPF7717 13043295..unknown function orf19.8063          | 7717 IPF7717 C-compour molecular_function unknown                                                              |
| CA4059 | 0.7 | 1.1 | 1.0 | 1.2 | PRD1 13045920..Proteinase (by homolo orf19.8064        | 5940 CaPRD1 PROTEIN I peptidase activity                                                                       |
| CA4060 | 1.0 | 1.5 |     | 1.2 | GRS1 complemer glycine-tRNA ligase (b) orf19.437       | 5937 CaGRS1 PROTEIN I ligase activity                                                                          |
| CA4061 | 0.9 | 1.2 | 1.0 | 1.0 | IPF5935 complemer Unknown function orf19.438           | 5935 IPF5935 UNCLASSI molecular_function unknown                                                               |
| CA4062 | 1.0 | 1.1 | 1.0 | 0.9 | IPF5933 13052447..similar to Saccharomy orf19.439      | 5933 IPF5933 CELL CYC transcription regulator activity                                                         |
| CA4063 | 1.1 | 1.0 | 1.0 | 1.2 | SDH11 13053735..Succinate dehydrogen orf19.440         | 5931 CaSDH11 C-compour oxidoreductase activity                                                                 |
| CA4064 | 0.8 | 1.0 |     | 1.2 | RPT1 13055941..26S PROTEASE REG orf19.441              | 5928 CaRPT1 CELL CYC peptidase activity                                                                        |
| CA4065 | 1.0 | 1.0 | 1.2 | 1.0 | RPC25 complemer DNA-direcred RNA pol orf19.443         | 5926 CaRPC25 TRANSCR nucleotidyltransferase activity                                                           |
| CA4066 | 0.9 | 1.0 | 1.0 | 1.0 | IPF5925 13058238..RNA-binding protein (t orf19.444     | 5925 IPF5925 TRANSCRIPTION SUBCELLULAR LOCALISATION                                                            |
| CA4067 | 1.1 | 0.9 | 0.8 | 1.3 | IPF5924 13058888..unknown function orf19.445           | 5924 IPF5924 UNCLASSI molecular_function unknown                                                               |
| CA4068 | 0.9 | 0.9 | 1.2 | 1.0 | IPF5922 13061155..unknown function orf19.446           | 5922 IPF5922 No significant S.c. match                                                                         |
| CA4069 |     |     |     |     | MHP1 13066468..13068705                                |                                                                                                                |
| CA4070 | 1.2 | 0.9 | 0.9 | 0.8 | IPF2562 complemer unknown function orf19.6623          | 2562 IPF2562 UNCLASSI molecular_function unknown                                                               |
| CA4071 | 1.0 | 0.8 | 1.0 | 0.8 | IPF2561 complemer unknown function orf19.6624          | 2561 IPF2561 CELLULAF enzyme regulator activity                                                                |
| CA4072 | 0.7 | 1.1 |     | 1.0 | IPF2560 13071318..unknown function orf19.6625          | 2560 IPF2560 CELL CYC molecular_function unknown                                                               |
| CA4073 | 1.5 | 1.0 | 1.0 | 0.9 | IPF2559.3 complemer unknown function, 3-pr orf19.6626  | 2559 IPF2559.3 No significant S.c. match                                                                       |
| CA4074 | 0.7 | 1.1 | 1.2 | 1.0 | IPF2557 complemer unknown function orf19.6627          | 2557 IPF2557 UNCLASSI molecular_function unknown                                                               |
| CA4075 | 1.0 | 0.9 | 1.0 | 1.1 | IPF2555 complemer unknown function orf19.6628          | 2555 IPF2555 SUBCELLULAR LOCALISATION                                                                          |
| CA4076 | 0.5 | 1.1 | 1.3 | 0.9 | IPF2542 13075857..putative neutral sphing orf19.6629   | 2542 IPF2542 Lipid fatty-ε hydrolase activity                                                                  |
| CA4077 | 1.9 | 1.1 | 1.1 | 1.6 | ACO2 13079616..aconitate hydratase (b) orf19.6632      | 2530 CaACO2 ENERGY lyase activity                                                                              |
| CA4078 | 1.6 | 0.8 | 1.2 | 1.0 | VMA2 complemer H+-transporting ATPas orf19.6634        | 2528 CaVMA2 CELLULAF transporter activity                                                                      |
| CA4079 | 1.2 |     |     | 1.1 | IPF2527 complemer unknown function orf19.6635          | 2527 IPF2527 No significant S.c. match                                                                         |
| CA4080 | 0.9 | 1.2 | 0.9 | 1.0 | IPF2524 13085887..unknown function orf19.6636          | 2524 IPF2524 UNCLASSI molecular_function unknown                                                               |
| CA4081 | 1.8 | 1.3 | 1.1 | 1.2 | IPF2523 complemer unknown function orf19.6637          | 2523 IPF2523 No significant S.c. match                                                                         |
| CA4082 | 0.9 | 1.2 |     | 1.0 | PTC4 13089027..ser/thr protein phosph orf19.6638       | 15571 CaPTC4 CLASSIFIC protein phosphatase activity                                                            |
| CA4083 | 0.7 | 1.2 | 1.0 | 1.0 | IPF5018 13091134..unknown function orf19.6639          | 5018 IPF5018 UNCLASSIFIED PROTEINS                                                                             |
| CA4084 | 0.8 | 1.0 | 1.0 | 1.1 | TPS1 complemer TREHALOSE-6-PHOS orf19.6640             | 5016 CaTPS1 C-compour transferase activity                                                                     |
| CA4085 | 0.8 | 1.1 | 1.1 | 1.0 | IPF5015 13095177..unknown function orf19.6641          | 5015 IPF5015 No significant S.c. match                                                                         |
| CA4086 | 0.9 | 1.0 | 0.9 | 1.1 | IPF5014 13096360..unknown function orf19.6642          | 5014 IPF5014 CELLULAF molecular_function unknown                                                               |
| CA4087 | 0.8 | 1.1 | 0.9 | 1.0 | IPF5013 complemer similar to Saccharomy orf19.6643     | 5013 IPF5013 Lipid fatty-ε transferase activity                                                                |
| CA4088 | 0.8 | 1.2 | 1.1 | 1.1 | HMO1 13099520..High-mobility protein 1 orf19.6645      | 5011 CaHMO1 SUBCELLL DNA binding,transcription regulator activity                                              |
| CA4089 | 1.2 | 1.2 | 1.1 | 1.0 | IPF5009 complemer unknown function orf19.6648          | 5009 IPF5009 CELL CYC molecular_function unknown                                                               |
| CA4090 | 1.4 | 1.0 | 0.9 | 1.1 | BRF1 complemer TFIIB subunit orf19.6649                | 5007 CaBRF1 TRANSCR transcription regulator activity                                                           |
| CA4091 | 1.7 | 1.0 | 1.1 | 0.9 | IPF5005 13104923..unknown function orf19.6650          | 5005 IPF5005 No significant S.c. match                                                                         |
| CA4092 | 1.5 | 1.0 | 0.8 | 0.9 | DBP8 complemer DEAD box protein ATF orf19.6652         | 5004 CaDBP8 TRANSCR RNA binding,helicase activity                                                              |
| CA4093 | 0.9 | 1.1 | 0.9 | 1.2 | IPF5002 13107433..GTP binding protein (b orf19.6653    | 5002 IPF5002 CLASSIFIC molecular_function unknown                                                              |
| CA4094 | 1.0 | 1.0 | 1.1 | 0.8 | IPF4004 13114300..unknown function orf19.658           | 4004 IPF4004 UNCLASSI molecular_function unknown                                                               |
| CA4095 | 0.8 | 1.0 | 1.1 | 1.0 | IPF4002 complemer unknown function orf19.660           | 4002 IPF4002 No significant S.c. match                                                                         |
| CA4096 | 1.5 | 1.0 | 1.0 |     | KRR1 complemer involved in cell division orf19.661     | 4000 CaKRR1 SUBCELLL molecular_function unknown                                                                |
| CA4097 | 0.9 | 0.8 | 1.2 | 0.9 | GIN4 13124277..ser/thr protein kinase ( orf19.663      | 3994 CaGIN4 CELL CYC protein kinase activity                                                                   |
| CA4098 | 1.3 | 1.0 | 1.0 | 0.9 | IPF3988 complemer unknown function orf19.664           | 3988 IPF3988 CELLULAR TRANSPORT AND TRANSPORT MECHANISMS CELL FATE CONTROL OF CELLULAR ORGANIZATION SUBC       |



|        |     |     |     |     |           |                                              |             |                |                        |                                                                                                        |
|--------|-----|-----|-----|-----|-----------|----------------------------------------------|-------------|----------------|------------------------|--------------------------------------------------------------------------------------------------------|
| CA4099 | 0.9 | 0.9 | 1.2 | 1.0 | IPF3986   | complemer unknown function                   | orf19.665   | 3986 IPF3986   | UNCLASSI               | molecular_function unknown                                                                             |
| CA4100 | 1.4 | 1.0 | 1.0 | 0.9 | IPF3985   | 13131074..unknown function                   | orf19.666   | 3985 IPF3985   | CELL                   | CYC protein binding                                                                                    |
| CA4101 | 0.9 | 1.1 | 1.1 | 0.8 | IPF3984   | 13132115..unknown function                   | orf19.667   | 3984 IPF3984   | No significant S.c.    | match                                                                                                  |
| CA4102 | 1.1 | 0.8 | 0.9 | 1.0 | RPL37B    | complemer Ribosomal protein                  |             | 20156 CaRPL37B | PROTEIN                | 'structural molecule activity                                                                          |
| CA4103 | 0.9 | 0.9 | 1.0 | 1.1 | IPF3980   | 13134897..unknown function                   | orf19.668   | 3980 IPF3980   | UNCLASSI               | DNA binding,transcription regulator activity                                                           |
| CA4104 | 0.8 | 0.9 | 2.5 | 1.2 | IPF20157  | complemer unknown function                   | orf19.669   | 20157 IPF20157 | UNCLASSI               | molecular_function unknown                                                                             |
| CA4105 | 0.6 | 1.0 | 0.9 | 0.8 | SMT3      | 13138818.. Ubiquitin-like protein (t         | orf19.670   | 20158 CaSMT3   | PROTEIN                | FATE [folding modification destination]                                                                |
| CA4107 | 0.9 | 1.2 | 1.2 | 1.0 | IPF3970   | 13140769..unknown function                   | orf19.671   | 3970 IPF3970   | UNCLASSI               | molecular_function unknown                                                                             |
| CA4108 | 0.9 | 1.0 | 1.3 | 1.2 | IPF3968   | 13145290..similar to Saccharomy              | orf19.672   | 3968 IPF3968   | TRANSCR                | RNA binding,helicase activity                                                                          |
| CA4109 | 0.8 | 1.1 | 1.1 | 0.9 | IPF3967   | complemer unknown function                   | orf19.673   | 3967 IPF3967   | ENERGY                 |                                                                                                        |
| CA4110 | 0.9 | 1.2 | 1.1 | 1.2 | IPF3965   | complemer unknown function                   | orf19.674   | 3965 IPF3965   | UNCLASSI               | molecular_function unknown                                                                             |
| CA4111 | 0.4 | 0.9 | 0.9 | 0.9 | IPF3964   | complemer unknown function                   | orf19.675   | 3964 IPF3964   | No significant S.c.    | match                                                                                                  |
| CA4112 | 0.9 | 1.1 | 1.1 | 1.1 | BIM1      | complemer microtubule-binding pr             | orf19.676   | 7699 CaBIM1    | CELL                   | CYC structural molecule activity                                                                       |
| CA4113 | 0.7 | 0.8 | 0.8 | 1.1 | CHO1      | 13154895.. Phosphatidylserine syr            | orf19.677   | 7703 CaCHO1    | Lipid fatty- $\alpha$  | transferase activity                                                                                   |
| CA4114 | 1.0 | 1.2 | 1.0 | 1.1 | IPF7704   | complemer unknown function                   | orf19.679   | 7704 IPF7704   | No significant S.c.    | match                                                                                                  |
| CA4115 | 1.2 | 1.1 | 0.8 | 1.0 | IPF7706   | 13156638..putative plasma memb               | orf19.680   | 7706 IPF7706   | UNCLASSI               | molecular_function unknown                                                                             |
| CA4116 | 0.6 | 0.8 | 0.9 | 1.0 | IDI1      | 13165199.. isopentenyl-diphospha             | orf19.2775  | 11947 CaIDI1   | Lipid fatty- $\alpha$  | isomerase activity                                                                                     |
| CA4117 | 1.9 | 1.3 | 1.2 | 1.0 | LAB5      | 13166539.. lipoic acid synthase (b)          | orf19.2774  | 11949 CaLAB5   | Metabolism of vitamins | cofactors and prosthetic groups ""SUBCELLULAR LOCALISATION                                             |
| CA4118 | 1.4 | 1.0 | 1.2 | 0.8 | IPF11952  | 13168575.. similar to Saccharomy             | orf19.2772  | 11952 IPF11952 | CLASSIFI               | C hydrolase activity                                                                                   |
| CA4119 | 1.3 | 1.2 | 0.9 | 0.8 | BEM3      | 13172328.. GTPase-activating pro             | orf19.2771  | 7085 CaBEM3    | CELL                   | FAT signal transducer activity                                                                         |
| CA4120 | 0.9 | 0.7 | 0.8 | 1.0 | SOD1.3    | complemer Cu,Zn-superoxide dismutase, 3-prir |             | 7082 CaSOD1.3  | CELL                   | RES oxidoreductase activity                                                                            |
| CA4121 | 0.9 | 1.0 | 1.3 | 1.1 | IPF7081   | complemer unknown function                   | orf19.2770  | 7081 IPF7081   | No significant S.c.    | match                                                                                                  |
| CA4122 | 1.5 | 1.0 | 1.1 | 0.8 | PBI2      | 13178853..proteinase B inhibitor 2           | orf19.2769  | 7079 CaPBI2    | PROTEIN                | lenzyme regulator activity                                                                             |
| CA4123 | 3.3 | 2.4 | 2.0 | 1.6 | AMS1      | 13179983..alpha-mannosidase (b)              | orf19.2768  | 7076 CaAMS1    | C-compou               | hydrolase activity                                                                                     |
| CA4124 | 0.2 | 0.5 | 0.1 | 0.2 | IPF20008  | complemer unknown function                   | orf19.2767  | 20008 IPF20008 | No significant S.c.    | match                                                                                                  |
| CA4125 | 0.2 | 0.8 | 0.3 | 1.2 | IPF20161  | 13195669..unknown function                   | orf19.10281 | 20161 IPF20161 | No significant S.c.    | match                                                                                                  |
| CA4126 | 1.2 | 1.0 | 1.0 | 0.9 | IPF6631   | complemer unknown function                   | orf19.2763  | 6631 IPF6631   | UNCLASSIFIED           | PROTEINS                                                                                               |
| CA4127 | 0.2 | 0.7 | 0.3 | 0.8 | IPF6629   | complemer unknown function                   | orf19.2762  | 6629 IPF6629   | CELL                   | RES oxidoreductase activity                                                                            |
| CA4128 | 0.7 | 1.0 | 1.1 | 1.1 | IPF6876   | 13208708..unknown function                   | orf19.11725 | 6876 IPF6876   | No significant S.c.    | match                                                                                                  |
| CA4129 | 0.5 | 0.7 | 1.0 | 1.2 | IPF6878   | complemer unknown function                   | orf19.11723 | 6878 IPF6878   | CLASSIFI               | C hydrolase activity                                                                                   |
| CA4130 | 0.5 | 0.8 | 0.9 | 1.1 | IPF20009  | 13216409.. Unknown function                  | orf19.11720 | 20009 IPF20009 | REGULATI               | molecular_function unknown                                                                             |
| CA4131 | 0.8 | 0.9 | 1.4 | 0.9 | IPF6886   | 13218620..unknown function                   | orf19.11718 | 6886 IPF6886   | UNCLASSI               | protein binding                                                                                        |
| CA4132 | 1.1 | 1.1 | 1.0 | 1.2 | STE20     | 13221889..serine/threonine-specif            | orf19.4242  | 7017 CaSTE20   | REGULATI               | protein kinase activity                                                                                |
| CA4133 | 0.4 | 0.9 | 0.9 | 1.3 | IPF7010.3 | complemer unknown function, 3-pr             | orf19.4241  | 7011 IPF7010.3 | No significant S.c.    | match                                                                                                  |
| CA4134 | 0.6 | 1.0 | 0.6 | 1.1 | COS162    | 13228250..involved in manganese              | orf19.4240  | 7009 CaCOS162  | REGULATI               | molecular_function unknown                                                                             |
| CA4135 | 1.0 | 0.9 | 1.1 | 1.0 | IPF20163  | 13229832..unknown function                   | orf19.4239  | 20163 IPF20163 | No significant S.c.    | match                                                                                                  |
| CA4136 | 1.2 | 1.1 | 0.8 | 1.0 | RET2      | 13232107..Coatomeer complex del              | orf19.4236  | 7005 CaRET2    | CELLULAF               | protein binding                                                                                        |
| CA4137 | 1.1 | 1.0 | 1.2 | 1.0 | CNA1      | complemer cyclic nucleotide phosp            | orf19.4235  | 7003 CaCNA1    | Nucleotide             | hydrolase activity                                                                                     |
| CA4138 | 1.8 | 1.3 | 1.1 | 0.9 | IPF11954  | 13237155..unknown function                   | orf19.4234  | 11954 IPF11954 | UNCLASSI               | molecular_function unknown                                                                             |
| CA4139 | 1.2 | 1.0 | 1.0 | 1.0 | THR4      | complemer threonine synthase (by             | orf19.4233  | 11957 CaTHR4   | Amino acid             | lyase activity                                                                                         |
| CA4140 | 1.8 | 1.2 | 1.1 | 1.0 | IPF11959  | 13240577..unknown function                   | orf19.4232  | 11959 IPF11959 | UNCLASSI               | molecular_function unknown                                                                             |
| CA4141 | 1.1 | 0.9 | 1.3 | 0.9 | PTH2      | complemer proline transport helpe            | orf19.11706 | 16485 CaPTH2   | CLASSIFI               | CATION NOT YET CLEAR-CUT                                                                               |
| CA4142 | 0.5 | 1.2 | 1.0 | 1.0 | PRE4      | complemer 20S proteasome subur               | orf19.11705 | 13337 CaPRE4   | PROTEIN                | I peptidase activity                                                                                   |
| CA4143 | 1.1 | 1.2 | 0.3 | 1.3 | DDP1      | 13251761..diadenosine and dipo               | orf19.4229  | 13339 CaDDP1   | CELL                   | RES hydrolase activity                                                                                 |
| CA4144 | 0.9 | 1.1 | 1.0 | 1.0 | IPF13340  | complemer unknown function                   | orf19.4228  | 13340 IPF13340 | UNCLASSI               | molecular_function unknown                                                                             |
| CA4145 | 1.1 | 1.0 | 1.1 | 0.8 | IPF3130   | complemer unknown function                   | orf19.4227  | 3130 IPF3130   | No significant S.c.    | match                                                                                                  |
| CA4146 | 1.3 | 1.3 | 1.2 | 1.2 | LEU3      | 13256314..Binds to UASs in prom              | orf19.11700 | 3138 CaLEU3    | Amino acid             | transcription regulator activity                                                                       |
| CA4147 | 0.9 | 0.8 | 1.0 | 1.0 | ADE8      | 13263190.. Phosphoribosylglycina             | orf19.13211 | 17327 CaADE8   | Nucleotide             | transferase activity                                                                                   |
| CA4148 | 0.7 | 0.3 | 0.6 | 1.1 | IDH2      | complemer Isocitrate dehydrogena             | orf19.13213 | 6833 CaIDH2    | C-compou               | oxidoreductase activity                                                                                |
| CA4149 | 1.0 | 0.9 | 1.0 | 1.0 | SMP3      | 13266283.. Protein kinase C pathw            | orf19.5792  | 6831 CaSMP3    | CELL                   | CYC molecular_function unknown                                                                         |
| CA4150 | 0.9 | 1.1 | 1.0 | 1.2 | RPT3      | complemer 26S proteasome regul               | orf19.5793  | 6830 CaRPT3    | PROTEIN                | I peptidase activity                                                                                   |
| CA4151 | 0.8 | 1.0 | 1.1 | 1.1 | SHE9      | complemer causes lethality when              | orf19.5796  | 6829 CaSHE9    | UNCLASSI               | molecular_function unknown                                                                             |
| CA4153 | 0.9 | 1.2 | 0.7 | 1.2 | DNLI      | complemer CANAL DNA LIGASE (                 | orf19.5798  | 6823 CaDNLI    | CELL                   | CYC ligase activity                                                                                    |
| CA4154 | 1.1 | 1.6 | 1.4 | 1.4 | IPF20010  | 13277763..unknown function                   | orf19.5799  | 20010 IPF20010 | UNCLASSIFIED           | PROTEINS                                                                                               |
| CA4155 | 0.1 | 0.1 | 0.2 | 0.5 | RNR21     | 13281287..ribonucleoside-diphos              | orf19.5801  | 10991 CaRNR21  | Nucleotide             | oxidoreductase activity                                                                                |
| CA4156 | 1.0 | 0.9 | 0.8 | 0.8 | IPF10990  | 13282933..unknown function                   | orf19.5802  | 10990 IPF10990 | UNCLASSI               | molecular_function unknown                                                                             |
| CA4157 | 1.1 | 1.1 | 1.3 | 1.2 | HYU1      | 13284597..hydantoin utilization pr           | orf19.5804  | 10288 CaHYU1   | Amino acid             | molecular_function unknown                                                                             |
| CA4158 | 1.4 | 1.1 | 0.9 | 0.8 | DLD3      | 13288923..D-lactate ferrycytochro            | orf19.5805  | 10287 CaDLD3   | C-compound             | and carbohydrate metabolism ENERGY SUBCELLULAR LOCALISATION                                            |
| CA4159 | 1.1 | 2.0 | 3.5 | 0.7 | ALD5      | 13293088..aldehyde dehydrogena               | orf19.13228 | 17030 CaALD5   | ENERGY                 | $\alpha$ oxidoreductase activity                                                                       |
| CA4160 | 1.0 | 0.8 | 1.2 | 1.1 | IPF9294   | 13294957..unknown function                   | orf19.5808  | 9294 IPF9294   | UNCLASSI               | transferase activity                                                                                   |
| CA4161 | 1.0 | 1.0 | 1.0 | 1.0 | IPF20164  | complemer putative kynurenine an             | orf19.5809  | 20164 IPF20164 | Nitrogen ar            | hydrolase activity                                                                                     |
| CA4162 | 0.9 | 1.0 | 1.2 | 0.9 | MET1      | complemer siroheme synthase (by              | orf19.5811  | 9300 CaMET1    | Metabolism             | transferase activity                                                                                   |
| CA4163 | 1.0 | 1.0 | 0.9 | 0.9 | IPF9301   | 13300548..unknown function                   | orf19.5812  | 9301 IPF9301   | UNCLASSI               | molecular_function unknown                                                                             |
| CA4164 | 0.9 | 0.7 | 1.1 | 1.2 | IPF9302   | complemer unknown function                   | orf19.13235 | 9302 IPF9302   | UNCLASSI               | molecular_function unknown                                                                             |
| CA4165 | 0.8 | 1.0 | 0.7 | 1.0 | IPF7774   | complemer unknown function                   | orf19.10485 | 7774 IPF7774   | No significant S.c.    | match                                                                                                  |
| CA4166 | 0.5 | 1.1 | 0.8 | 1.0 | TIF34     | complemer Translation initiation fa          | orf19.2967  | 7775 CaTIF34   | PROTEIN                | 'translation regulator activity                                                                        |
| CA4167 | 1.0 | 1.0 | 1.2 | 1.2 | IPF7778   | complemer putative carboxymethyl             | orf19.2966  | 7778 IPF7778   | UNCLASSI               | hydrolase activity                                                                                     |
| CA4168 | 0.8 | 0.7 | 0.8 | 1.0 | IPF7781   | complemer putative pump-driving              | orf19.2965  | 7781 IPF7781   | CELL                   | RES molecular_function unknown                                                                         |
| CA4169 | 1.1 | 1.2 | 0.9 | 0.9 | RSC2      | 13309517..Member of RSC compl                | orf19.2964  | 7783 CaRSC2    | CELL                   | CYC molecular_function unknown                                                                         |
| CA4170 | 1.1 | 0.9 | 1.0 | 1.1 | IPF7784   | 13312164..unknown function                   | orf19.2963  | 7784 IPF7784   | CELL                   | CYCLE AND DNA PROCESSING TRANSCRIPTION ""PROTEIN FATE [folding modification destination] ""CELL FATE S |
| CA4171 | 1.1 | 0.9 | 1.0 | 1.0 | IPF7785   | complemer unknown function                   | orf19.2962  | 7785 IPF7785   | No significant S.c.    | match                                                                                                  |

|        |     |     |     |     |            |                                                    |             |       |            |                                                                                                  |
|--------|-----|-----|-----|-----|------------|----------------------------------------------------|-------------|-------|------------|--------------------------------------------------------------------------------------------------|
| CA4172 | 1.0 | 0.9 | 1.0 | 1.2 | IPF4432    | complemer unknown function                         | orf19.2961  | 4432  | IPF4432    | CELL CYCLE AND DNA PROCESSING TRANSCRIPTION SUBCELLULAR LOCALISATION                             |
| CA4173 | 0.8 | 1.0 | 1.2 | 1.1 | FRS2       | complemer phenylalanine--tRNA li                   | orf19.2960  | 4431  | CaFRS2     | PROTEIN ligase activity                                                                          |
| CA4174 | 0.7 | 1.5 | 1.6 | 1.1 | IPF4119.5  | 13324134..unknown function, 5-prime end            |             | 4430  | IPF4119.5  | CLASSIFICATION NOT YET CLEAR-CUT                                                                 |
| CA4175 | 0.9 | 0.9 | 1.2 |     | IPF4425.RI | 13327113..unknown function                         | orf19.2958  | 4427  | IPF4425.re | UNCLASSIFIED PROTEINS                                                                            |
| CA4176 | 1.8 | 1.0 | 1.1 | 0.8 | IPF4425.RI | 13330464..unknown function                         | orf19.2957  | 4425  | IPF4425.re | UNCLASSIFIED PROTEINS                                                                            |
| CA4177 | 0.9 | 1.0 | 0.9 | 1.1 | MGM101     | 13333161..mitochondrial genome                     | orf19.2956  | 4423  | CaMGM10    | CELL CYC DNA binding                                                                             |
| CA4178 | 1.1 | 1.3 | 1.2 | 1.0 | IPF4421    | complemer unknown function                         | orf19.2954  | 4421  | IPF4421    | No significant S.c. match                                                                        |
| CA4179 | 0.9 | 0.9 | 0.9 | 1.0 | TOM20      | 13335192..mitochondrial outer me                   | orf19.2953  | 4420  | CaTOM20    | PROTEIN Itransporter activity                                                                    |
| CA4180 | 1.0 | 0.9 | 1.1 | 0.9 | EXG2       | 13336189..glucan 1,3-beta-glucos                   | orf19.2952  | 4419  | CaEXG2     | C-compound and carbohydrate metabolism CELL FATE SUBCELLULAR LOCALISATION                        |
| CA4181 | 0.3 | 1.0 | 0.9 | 1.7 | HOM6       | 13337992..homoserine dehydroge                     | orf19.2951  | 4417  | CaHOM6     | Amino acid oxidoreductase activity                                                               |
| CA4182 | 0.7 | 1.0 | 1.1 | 0.9 | IPF19797   | complemer similar to Saccharomy                    | orf19.10466 | 19797 | IPF19797   | CELL CYC molecular_function unknown                                                              |
| CA4183 | 0.9 | 1.1 | 0.9 | 1.1 | SNO1       | complemer hisH-like protein (by hc                 | orf19.10465 | 4408  | CaSNO1     | CELL RES protein binding                                                                         |
| CA4184 | 0.5 | 0.6 | 0.6 | 0.9 | SNZ1       | 13345964..stationary phase protei                  | orf19.2947  | 10248 | CaSNZ1     | CELL CYC protein binding                                                                         |
| CA4185 | 0.9 | 0.8 | 1.0 | 0.9 | HNM4       | complemer Choline permease-like                    | orf19.2946  | 10246 | CaHNM4     | CELLULAR TRANSPORT AND TRANSPORT MECHANISMS SUBCELLULAR LOCALISATION TRANSPORT FACILITATION      |
| CA4186 | 1.0 | 1.2 | 1.0 | 1.1 | PUT4       | 13349485..proline permease                         | orf19.2945  | 10243 | CaPUT4     | Amino acid metabolism TRANSPORT FACILITATION                                                     |
| CA4187 | 1.2 | 0.9 | 1.0 | 0.9 | IPF7524    | 13356397..unknown function                         | orf19.12003 | 7524  | IPF7524    | UNCLASSI molecular_function unknown                                                              |
| CA4188 | 0.8 | 1.0 | 0.9 | 0.9 | IPF7525    | 13357317..unknown function                         | orf19.4529  | 7525  | IPF7525    | No significant S.c. match                                                                        |
| CA4189 | 0.9 | 0.8 | 0.8 | 1.3 | IPF7527    | complemer unknown function                         |             | 7527  | IPF7527    | CELLULAR COMMUNICATION/SIGNAL TRANSDUCTION MECHANISM REGULATION OF/INTERACTION WITH CELLULAF     |
| CA4190 | 0.3 | 1.3 | 0.7 | 0.9 | IPF7530    | complemer ATP-binding-cassette                     | orf19.12006 | 7530  | IPF7530    | TRANSPO transporter activity,hydrolase activity                                                  |
| CA4191 | 1.2 | 1.0 | 1.0 | 1.2 | IPF7531    | complemer unknown function                         | orf19.12007 | 7531  | IPF7531    | UNCLASSI molecular_function unknown                                                              |
| CA4192 | 0.9 | 1.2 | 0.9 | 1.0 | IPF7533    | 13367323..unknown function                         | orf19.4533  | 7533  | IPF7533    | PROTEIN tRNA binding                                                                             |
| CA4193 | 1.1 | 1.1 | 0.9 | 1.2 | IPF7535    | 13369287..unknown function                         | orf19.4534  | 7535  | IPF7535    | UNCLASSI molecular_function unknown                                                              |
| CA4194 | 1.3 | 1.2 | 1.0 | 1.0 | PTR3       | 13371163..transcriptional regulato                 | orf19.4535  | 19799 | CaPTR3     | TRANSCRIPTION                                                                                    |
| CA4195 | 0.9 | 1.1 | 1.0 | 1.0 | CYS4       | 13373807..cystathionine beta-syn                   | orf19.4536  | 8061  | CaCYS4     | Amino acid lyase activity                                                                        |
| CA4196 | 1.1 | 0.8 | 1.0 | 1.2 | DST1       | complemer RNA polymerase II elo                    | orf19.4537  | 8059  | CaDST1     | CELL CYC transcription regulator activity                                                        |
| CA4197 | 0.8 | 0.8 | 1.0 | 1.0 | IPF8057    | 13376497..similar to Saccharomy                    | orf19.4538  | 8057  | IPF8057    | TRANSCR RNA binding                                                                              |
| CA4198 | 1.0 | 0.9 | 1.1 | 1.0 | IPF8055    | 13377995..unknown function                         | orf19.4539  | 8055  | IPF8055    | CELL FATE SUBCELLULAR LOCALISATION PROTEIN ACTIVITY REGULATION                                   |
| CA4199 | 0.9 | 1.0 | 1.3 | 0.8 | UBC8       | 13379302..ubiquitin-conjugating e                  | orf19.4540  | 8054  | CaUBC8     | PROTEIN FATE [folding modification destination]                                                  |
| CA4200 | 0.9 | 0.8 | 1.0 | 1.0 | CCL1       | 13380436..cyclin (by homology)                     | orf19.4542  | 8051  | CaCCL1     | CELL CYC transcription regulator activity                                                        |
| CA4201 | 1.2 | 1.1 | 1.4 | 0.9 | IPF8048    | 13381912..probable succinate-ser                   | orf19.4543  | 8048  | IPF8048    | Amino acid metabolism                                                                            |
| CA4202 | 0.9 | 0.9 | 0.9 | 0.9 | IPF8047    | complemer unknown function                         | orf19.4544  | 8047  | IPF8047    | No significant S.c. match                                                                        |
| CA4203 | 1.0 | 1.0 | 1.0 | 1.0 | SWI4       | complemer transcription factor (by                 | orf19.12020 | 17386 | CaSWI4     | CELL CYCLE AND DNA PROCESSING TRANSCRIPTION SUBCELLULAR LOCALISATION                             |
| CA4204 | 1.9 | 1.7 | 1.9 | 1.2 | HOL4       | 13390282..member of major facilit                  | orf19.12021 | 14750 | CaHOL4     | CELL RESCUE DEFENSE AND VIRULENCE ""TRANSPORT FACILITATION                                       |
| CA4205 | 1.1 | 0.8 | 1.3 | 0.9 | IFA10      | complemer unknown function                         | orf19.12024 | 9076  | CaIFA10    | Nucleotide metabolism CELL CYCLE AND DNA PROCESSING CELLULAR COMMUNICATION/SIGNAL TRANSDUCTION M |
| CA4206 | 1.5 | 0.9 | 1.0 | 0.8 | IPF9079    | complemer Membrane transporter                     | orf19.4550  | 9079  | IPF9079    | CELL RES molecular_function unknown                                                              |
| CA4207 | 7.7 | 1.6 | 1.3 | 1.3 | YAT1       | complemer carnitine acetyltransfer                 | orf19.4551  | 9082  | CaYAT1     | Lipid fatty-ε transferase activity                                                               |
| CA4208 | 1.0 | 1.1 | 1.0 | 0.9 | CHS5.5E0   | complemer chitin biosynthesis, 5-prime end         |             | 18240 | CaCHS5.5   | C-compound and carbohydrate metabolism CELL FATE SUBCELLULAR LOCALISATION                        |
| CA4209 | 1.2 | 1.1 | 1.0 | 1.3 | DEP1.3F    | complemer Regulator of phospholi                   | orf19.8427  | 18239 | CaDEP1.3f  | Lipid fatty-ε molecular_function unknown                                                         |
| CA4210 | 1.0 | 1.2 | 0.9 | 1.0 | DEP1.5F    | complemer Regulator of phospholi                   | orf19.8428  | 18238 | CaDEP1.5f  | No significant S.c. match                                                                        |
| CA4211 | 1.2 | 0.9 | 1.1 | 1.0 | IPF5052    | 13410471..RNA-binding protein (t                   | orf19.809   | 5051  | IPF5052    | UNCLASSIRNA binding                                                                              |
| CA4212 | 0.9 | 1.0 | 1.1 | 1.0 | HFM1       | complemer DNA/RNA helicase by                      | orf19.810   | 5050  | CaHFM1     | TRANSCR DNA binding,helicase activity                                                            |
| CA4213 | 1.1 | 1.0 | 1.3 | 1.1 | IPF5795    | complemer unknown function                         | orf19.811   | 5795  | IPF5795    | UNCLASSI molecular_function unknown                                                              |
| CA4214 | 1.2 | 0.9 | 1.0 | 1.0 | IPF5796    | complemer unknown function                         | orf19.812   | 5796  | IPF5796    | No significant S.c. match                                                                        |
| CA4215 | 1.8 | 0.9 | 1.2 | 1.2 | SSY1       | 13422639..Regulator of transporte                  | orf19.8434  | 5802  | CaSSY1     | Amino acid metabolism TRANSCRIPTION                                                              |
| CA4216 | 1.4 | 1.6 | 1.2 | 1.2 | IPF5806    | 13426650..unknown function                         | orf19.8435  | 5806  | IPF5806    | UNCLASSI molecular_function unknown                                                              |
| CA4217 | 1.3 | 1.1 | 1.0 | 1.1 | IPF5809    | 13433312..unknown function                         | orf19.816   | 5809  | IPF5809    | UNCLASSIFIED PROTEINS                                                                            |
| CA4218 | 1.0 | 1.0 | 0.9 | 0.9 | ACP1       | 13438905..mitochondrial acyl carr                  | orf19.819   | 8766  | CaACP1     | Lipid fatty-acid and isoprenoid metabolism ""SUBCELLULAR LOCALISATION TRANSPORT FACILITATION     |
| CA4219 | 0.8 | 0.9 | 1.0 | 1.1 | SDS22      | 13439771..regulatory subunit for t                 | orf19.820   | 8765  | CaSDS22    | CELL CYC enzyme regulator activity                                                               |
| CA4220 | 0.7 | 2.2 | 1.7 | 1.7 | IPF8762    | 13441293..unknown function                         | orf19.822   | 8762  | IPF8762    | No significant S.c. match                                                                        |
| CA4221 | 1.1 | 1.1 | 0.9 | 1.0 | IPF8760    | 13442052..unknown function                         | orf19.823   | 8760  | IPF8760    | No significant S.c. match                                                                        |
| CA4222 | 0.8 | 0.8 | 1.0 | 1.1 | GCD7       | complemer translation initiation fac               | orf19.825   | 8759  | CaGCD7     | PROTEIN ttranslation regulator activity                                                          |
| CA4223 | 0.8 | 0.9 | 2.6 | 1.0 | IPF8757    | 13444107..unknown function                         | orf19.826   | 8757  | IPF8757    | No significant S.c. match                                                                        |
| CA4224 | 1.2 | 1.0 | 1.0 | 0.9 | IPF8755    | complemer unknown function                         | orf19.827   | 8755  | IPF8755    | No significant S.c. match                                                                        |
| CA4225 | 1.3 | 0.9 | 0.9 | 0.9 | RPL39.3    | complemer ribosomal protein L39, 3-prime end       |             | 8753  | CaRPL39.3  | PROTEIN t:molecular_function unknown                                                             |
| CA4226 | 0.7 | 1.0 | 0.7 | 0.9 | IPF8752    | complemer similar to Saccharomy                    | orf19.828   | 8752  | IPF8752    | PROTEIN t:structural molecule activity                                                           |
| CA4227 | 1.3 | 0.9 | 1.1 | 1.3 | SCH9       | 13452163..strong similarity to S.p                 | orf19.829   | 13426 | CaSCH9     | CELL CYC protein kinase activity                                                                 |
| CA4228 | 0.5 | 0.9 | 1.1 | 0.9 | IPF16057   | 13455459..unknown function                         | orf19.831   | 16057 | IPF16057   | C-compound transcription regulator activity                                                      |
| CA4229 | 1.0 | 1.4 | 1.0 | 1.1 | IPF12480.ε | complemer unknown function, 5-prime end            |             | 12480 | IPF12480.ε | CELLULAR COMMUNICATION/SIGNAL TRANSDUCTION MECHANISM                                             |
| CA4230 | 0.9 | 1.0 | 0.9 | 0.9 | IPF12481   | 13459645..unknown function                         | orf19.513   | 12481 | IPF12481   | CELL CYCLE AND DNA PROCESSING                                                                    |
| CA4231 | 0.6 | 1.0 | 1.0 | 1.0 | SNP3       | 13461408..snRNP-related protein                    | orf19.514   | 12483 | CaSNP3     | TRANSCR RNA binding                                                                              |
| CA4232 | 0.8 | 0.9 | 1.2 | 1.1 | IPF12484   | complemer unknown function                         | orf19.515   | 12484 | IPF12484   | UNCLASSI molecular_function unknown                                                              |
| CA4233 | 1.7 | 1.0 | 1.0 | 0.9 | RFT1       | complemer nuclear division protei                  | orf19.516   | 12486 | CaRFT1     | CELL CYC transporter activity                                                                    |
| CA4234 | 1.3 | 1.0 | 1.1 | 0.8 | HAP3       | 13465254..CCAAT-binding factor                     | orf19.517   | 12488 | CaHAP3     | TRANSCR transcription regulator activity                                                         |
| CA4235 | 1.0 | 1.1 | 1.1 | 1.0 | NCL1       | 13466093..Probable proliferating- <i>orf19.518</i> |             | 8167  | CaNCL1     | TRANSCR transferase activity                                                                     |
| CA4236 | 1.3 | 0.8 | 1.2 | 1.2 | IPF8166    | complemer unknown function                         | orf19.519   | 8166  | IPF8166    | TRANSCR DNA binding,transcription regulator activity                                             |
| CA4237 | 1.8 | 1.2 | 1.2 | 0.9 | IPF6375    | 13469527..unknown function                         | orf19.520   | 6375  | IPF6375    | No significant S.c. match                                                                        |
| CA4238 | 1.6 | 1.2 | 1.0 | 0.8 | PIM1       | 13471159..mitochondrial ATP-dep                    | orf19.522   | 8173  | CaPIM1     | TRANSCR peptidase activity                                                                       |
| CA4239 | 0.7 | 1.1 | 1.1 | 1.1 | IPF8174    | complemer unknown function                         | orf19.524   | 8174  | IPF8174    | No significant S.c. match                                                                        |
| CA4240 | 1.0 | 1.1 | 1.1 | 1.0 | NHP2       | complemer nucleolar rRNA proces                    | orf19.526   | 8176  | CaNHP2     | TRANSCR RNA binding                                                                              |
| CA4241 | 0.9 | 1.1 | 1.2 | 0.9 | IPF8177    | 13477042..unknown function                         | orf19.527   | 8177  | IPF8177    | No significant S.c. match                                                                        |
| CA4242 | 1.1 | 0.9 | 0.9 | 1.1 | SEC26      | complemer beta chain of secretory                  | orf19.528   | 15941 | CaSEC26    | CELLULAF molecular_function unknown                                                              |

|        |     |     |     |     |            |                                               |            |                  |                                                     |                                             |                               |
|--------|-----|-----|-----|-----|------------|-----------------------------------------------|------------|------------------|-----------------------------------------------------|---------------------------------------------|-------------------------------|
| CA4243 | 1.0 | 1.0 | 1.1 | 1.1 | IPF16491   | complemer unknown function                    | orf19.529  | 16491 IPF16491   | C-compound and carbohydrate metabolism              | SUBCELLULAR LOCALISATION                    |                               |
| CA4244 | 1.0 | 0.8 | 1.0 | 1.0 | IPF4305    | 13485139..unknown function                    | orf19.530  | 4305 IPF4305     | No significant S.c. match                           |                                             |                               |
| CA4245 | 1.1 | 1.5 | 1.3 | 1.0 | IPF4303    | complemer unknown function                    | orf19.532  | 4303 IPF4303     | No significant S.c. match                           |                                             |                               |
| CA4246 | 1.0 | 0.9 | 1.0 | 1.0 | IPF4299    | complemer unknown function                    | orf19.535  | 4299 IPF4299     | No significant S.c. match                           |                                             |                               |
| CA4247 | 0.8 | 1.0 | 1.0 | 1.0 | TAF90      | complemer Probable transcription-             | orf19.536  | 4296 CaTAF90     | TRANSCR transcription regulator activity            |                                             |                               |
| CA4248 | 1.1 | 1.0 | 0.6 | 1.1 | IPF4294    | complemer unknown function                    | orf19.537  | 4294 IPF4294     | UNCLASSI molecular_function unknown                 |                                             |                               |
| CA4249 | 0.9 | 1.0 | 1.1 | 0.9 | IPF4293    | 13495440..similar to Saccharomy               | orf19.538  | 4293 IPF4293     | Lipid fatty-e molecular_function unknown            |                                             |                               |
| CA4250 | 2.1 | 0.9 | 1.7 | 1.7 | IPF4292    | complemer bleomycin Hydrolase                 | orf19.539  | 4292 IPF4292     | PROTEIN I transcription regulator activity          |                                             |                               |
| CA4251 | 0.9 | 1.0 | 1.0 | 1.1 | IPF4291    | complemer unknown function                    | orf19.540  | 4291 IPF4291     | CELL CYCLE AND DNA PROCESSING                       | SUBCELLULAR LOCALISATION                    |                               |
| CA4252 | 1.1 | 0.9 | 1.2 | 1.2 | IPF4290    | complemer unknown function                    | orf19.541  | 4290 IPF4290     | No significant S.c. match                           |                                             |                               |
| CA4253 | 0.8 | 0.9 | 1.0 | 1.3 | IPF4288    | complemer unknown function                    |            | 4288 IPF4288     | No significant S.c. match                           |                                             |                               |
| CA4254 | 0.6 | 0.9 | 1.0 | 0.8 | IPF18234.3 | 13504904..Unknown Function, 3-prime end       |            | 18234 IPF18234.3 | UNCLASSIFIED PROTEINS                               |                                             |                               |
| CA4255 | 0.8 | 1.1 | 1.1 | 1.1 | FUM11      | 13505439..fumarate hydratase                  | orf19.543  | 4283 CaFUM11     | ENERGY llyase activity                              |                                             |                               |
| CA4256 | 0.5 | 1.0 | 0.9 | 0.9 | IPF4282    | complemer unknown function                    | orf19.544  | 4282 IPF4282     | TRANSCR RNA binding                                 |                                             |                               |
| CA4257 | 0.8 | 0.9 | 0.9 | 1.1 | PRE6       | 13507748..20S proteasome subunit              |            | 4281 CaPRE6      | PROTEIN I molecular_function unknown                |                                             |                               |
| CA4258 | 1.1 | 0.9 | 0.9 | 1.1 | IPF4279    | complemer unknown function                    | orf19.547  | 4279 IPF4279     | CELL CYC DNA binding                                |                                             |                               |
| CA4259 | 0.5 | 0.6 | 0.9 | 0.9 | CDC10      | complemer cell division control pro           | orf19.548  | 4277 CaCDC10     | C-compour structural molecule activity              |                                             |                               |
| CA4260 | 1.1 | 0.9 | 1.0 | 1.0 | IPF4276    | 13511668..similar to Saccharomy               | orf19.549  | 4276 IPF4276     | PROTEIN I structural molecule activity              |                                             |                               |
| CA4261 | 0.9 | 0.9 | 1.0 | 1.1 | PDX3       | complemer pyridoxamine-phospha                | orf19.550  | 4274 CaPDX3      | Metabolism oxidoreductase activity                  |                                             |                               |
| CA4262 | 1.5 | 1.0 | 1.2 | 1.1 | IPF2275    | complemer unknown function                    | orf19.6654 | 2275 IPF2275     | UNCLASSIFIED PROTEINS                               |                                             |                               |
| CA4263 | 0.5 | 0.9 | 0.9 | 0.9 | IPF2277    | complemer unknown function                    | orf19.6656 | 2277 IPF2277     | REGULATION OF/INTERACTION WITH CELLULAR ENVIRONMENT | SUBCELLULAR LOCALISATION TRANSPORT FACILI   |                               |
| CA4264 | 0.9 | 1.0 | 0.9 | 1.2 | IPF2280    | complemer unknown function                    | orf19.6658 | 2280 IPF2280     | No significant S.c. match                           |                                             |                               |
| CA4265 | 1.5 | 1.5 | 1.3 | 1.0 | GAP6       | 13521030..General amino acid pe               | orf19.6659 | 2282 CaGAP6      | Amino acid metabolism                               | CELLULAR TRANSPORT AND TRANSPORT MECHANISMS | SUBCELLULAR LOCALISATION TRAN |
| CA4266 | 1.4 | 1.2 | 0.9 | 1.1 | IPF2283    | complemer unknown function                    | orf19.6660 | 2283 IPF2283     | UNCLASSI molecular_function unknown                 |                                             |                               |
| CA4267 | 1.3 | 0.9 | 1.1 | 0.9 | IPF2286    | 13526537..unknown function                    | orf19.6661 | 2286 IPF2286     | No significant S.c. match                           |                                             |                               |
| CA4268 | 0.9 | 1.0 | 0.8 | 1.0 | IPF2287    | complemer unknown function                    | orf19.6662 | 2287 IPF2287     | UNCLASSI molecular_function unknown                 |                                             |                               |
| CA4269 | 0.3 | 0.6 | 1.1 | 1.1 | RPS25B     | complemer Cytosolic ribosomal pr              | orf19.6663 | 2288 CaRPS25B    | PROTEIN I structural molecule activity              |                                             |                               |
| CA4270 | 1.0 | 1.3 | 1.0 | 0.9 | NUP2       | 13529973..Nuclear pore protein (t             | orf19.6665 | 2295 CaNUP2      | CELLULAF structural molecule activity               |                                             |                               |
| CA4271 | 1.1 | 0.9 | 1.1 | 1.0 | SAP30      | 13532889..Subunit of the histone              | orf19.6667 | 2297 CaSAP30     | TRANSCR hydrolase activity                          |                                             |                               |
| CA4272 | 0.6 | 1.0 | 1.0 | 0.9 | CUE1       | 13533828..Involved in ubiquitinati            | orf19.6668 | 2299 CaCUE1      | PROTEIN I protein binding                           |                                             |                               |
| CA4273 | 0.8 | 1.0 | 1.1 | 0.9 | CAC2       | complemer Chromatin assembly c                | orf19.6670 | 2301 CaCAC2      | CELL CYC molecular_function unknown                 |                                             |                               |
| CA4274 | 1.2 | 1.0 | 1.0 | 1.2 | LAP42      | 13536542..Aminopeptidase yscI p               | orf19.6671 | 2303 CaLAP42     | PROTEIN FATE [folding modification destination] ""  | SUBCELLULAR LOCALISATION                    |                               |
| CA4275 | 0.8 | 1.1 | 1.0 | 1.0 | MDJ1       | 13538604..Heat shock protein - c              | orf19.6672 | 2305 CaMDJ1      | PROTEIN I chaperone activity                        |                                             |                               |
| CA4276 | 1.2 | 0.8 | 1.2 | 0.9 | HEX1       | 13540810..β-N-acetylglucosaminin              | orf19.6673 | 2308 CaHEX1      | No significant S.c. match                           |                                             |                               |
| CA4277 | 1.2 | 1.1 | 1.1 | 1.1 | BTS1       | 13543155..Geranylgeranyl diphos               | orf19.6674 | 2309 CaBTS1      | Lipid fatty-ztransferase activity                   |                                             |                               |
| CA4278 | 1.0 | 1.2 | 1.0 | 1.0 | IPF2310    | complemer unknown function                    | orf19.6675 | 2310 IPF2310     | No significant S.c. match                           |                                             |                               |
| CA4279 | 1.4 | 1.0 | 1.0 | 0.8 | DPH51      | 13544839..Diphthamide methyltra               | orf19.6676 | 2311 CaDPH51     | Amino acid transferase activity                     |                                             |                               |
| CA4280 | 0.9 | 1.1 | 0.8 | 1.0 | IFJ5       | complemer Unknown function                    | orf19.6678 | 2313 CaIFJ5      | UNCLASSIFIED PROTEINS                               |                                             |                               |
| CA4281 | 1.1 | 1.0 | 1.1 | 1.1 | IPF2314    | complemer unknown function                    | orf19.6679 | 2314 IPF2314     | No significant S.c. match                           |                                             |                               |
| CA4282 | 1.0 | 1.1 | 0.9 | 1.0 | IPF2319    | 13552041..unknown function                    | orf19.6680 | 2319 IPF2319     | TRANSCRIPTION                                       |                                             |                               |
| CA4283 | 1.0 | 0.9 | 1.0 | 1.0 | IFJ4       | 13555358..Unknown function                    | orf19.6681 | 2321 CaIFJ4      | UNCLASSIFIED PROTEINS                               |                                             |                               |
| CA4284 | 1.0 | 1.1 | 1.0 | 1.1 | DPH52.3E   | complemer Diphthamide methyltra               | orf19.6682 | 2322 CaDPH52.3E  | Amino acid metabolism                               |                                             |                               |
| CA4287 | 0.9 | 1.0 | 1.1 | 1.0 | IPF20011.3 | 13557688..similar to Saccharomyces cerevisiae |            | 20012 IPF20011.3 | UNCLASSIFIED PROTEINS                               |                                             |                               |
| CA4288 | 1.0 | 0.9 | 0.9 | 1.0 | IPF6662    | complemer similar to Saccharomy               | orf19.6685 | 6662 IPF6662     | TRANSCR RNA binding                                 |                                             |                               |
| CA4289 | 1.2 | 1.0 | 1.0 | 1.0 | IPF6665    | complemer unknown function                    | orf19.6686 | 6665 IPF6665     | UNCLASSI molecular_function unknown                 |                                             |                               |
| CA4290 | 1.0 | 0.9 | 1.0 | 1.0 | IPF2617    | complemer unknown function                    | orf19.6687 | 2617 IPF2617     | No significant S.c. match                           |                                             |                               |
| CA4291 | 4.0 | 4.8 | 2.0 | 1.4 | IPF2615    | 13568848..unknown function                    | orf19.6688 | 2615 IPF2615     | No significant S.c. match                           |                                             |                               |
| CA4293 | 0.4 | 1.0 | 0.9 | 1.0 | IFA8       | 13571419..Unknown function                    | orf19.6690 | 2611 CaIFA8      | UNCLASSIFIED PROTEINS                               |                                             |                               |
| CA4294 | 1.2 | 1.2 | 1.0 | 1.2 | ERC1       | complemer ethionine resistance pr             | orf19.6691 | 2610 CaERC1      | CELL RES molecular_function unknown                 |                                             |                               |
| CA4295 | 1.0 | 0.9 | 1.1 | 1.0 | MNN7       | 13579767..putative Golgi alpha-1,             | orf19.6692 | 2606 CaMNN7      | CELL FATE                                           |                                             |                               |
| CA4296 | 1.1 | 1.2 | 1.1 | 0.9 | IPF2605    | complemer unknown function                    | orf19.6693 | 2605 IPF2605     | UNCLASSI molecular_function unknown                 |                                             |                               |
| CA4297 | 1.1 | 0.9 | 1.2 | 1.2 | IPF2603    | complemer unknown function                    | orf19.6694 | 2603 IPF2603     | TRANSCRIPTION CELL FATE                             | SUBCELLULAR LOCALISATION                    |                               |
| CA4298 | 0.8 | 0.9 | 0.9 | 0.8 | TIM9       | complemer Mitochondrial inner me              | orf19.6696 | 2599 CaTIM9      | PROTEIN I chaperone activity                        |                                             |                               |
| CA4299 | 0.8 | 1.0 | 1.1 | 0.9 | IPF2598    | complemer unknown function                    | orf19.6698 | 2598 IPF2598     | PROTEIN I ligase activity                           |                                             |                               |
| CA4300 | 1.0 | 0.8 | 0.7 | 1.1 | HIS2       | 13590854..Histidinol phosphatase              | orf19.6699 | 2596 CaHIS2      | Amino acid hydrolase activity                       |                                             |                               |
| CA4301 | 0.7 | 0.9 | 1.4 | 0.9 | IPF2593    | complemer amino acid-tRNA ligas               | orf19.6701 | 2593 IPF2593     | PROTEIN I ligase activity                           |                                             |                               |
| CA4302 | 0.5 | 0.8 | 1.0 | 1.0 | DED81      | 13594793..Asparaginyl-tRNA synt               | orf19.6702 | 2591 CaDED81     | PROTEIN I ligase activity                           |                                             |                               |
| CA4303 | 0.7 | 0.9 | 0.8 | 1.0 | IFB1       | 13596937..unknown function                    | orf19.6703 | 2590 CaIFB1      | CELLULAR TRANSPORT AND TRANSPORT MECHANISMS         | SUBCELLULAR LOCALISATION                    |                               |
| CA4304 | 1.0 | 1.0 | 1.0 | 1.0 | IPF6649    | 13599850..unknown function                    | orf19.6704 | 6649 IPF6649     | CELL CYCLE AND DNA PROCESSING                       | PROTEIN SYNTHESIS                           | SUBCELLULAR LOCALISATION      |
| CA4305 | 0.8 | 0.9 | 0.9 | 1.1 | IPF6654    | 13605657..unknown function                    | orf19.6705 | 6654 IPF6654     | UNCLASSI molecular_function unknown                 |                                             |                               |
| CA4306 | 1.3 | 1.2 | 1.2 | 1.1 | GYP7       | 13609552..GTPase activating prot              | orf19.6706 | 6656 CaGYP7      | CONTROL enzyme regulator activity                   |                                             |                               |
| CA4307 | 1.1 | 1.0 | 1.0 | 0.8 | IPF20013   | 13612322..Unknown function                    | orf19.6707 | 20013 IPF20013   | PROTEIN I hydrolase activity                        |                                             |                               |
| CA4308 | 0.9 | 1.1 | 1.1 | 1.1 | IPF6660    | 13613872..unknown function                    | orf19.6708 | 6660 IPF6660     | UNCLASSIFIED PROTEINS                               |                                             |                               |
| CA4309 | 0.9 | 1.1 | 0.9 | 0.9 | IPF2127.3  | 13616446..unknown function, 3-pr              | orf19.4117 | 2127 IPF2127.3   | No significant S.c. match                           |                                             |                               |
| CA4310 | 1.4 | 1.1 | 0.9 | 0.9 | IPF2125    | complemer unknown function                    | orf19.4116 | 2125 IPF2125     | UNCLASSIFIED PROTEINS                               |                                             |                               |
| CA4311 | 1.8 | 0.9 | 1.0 | 1.1 | FAA23      | 13620672..Long-chain-fatty-acid-              | orf19.4114 | 2123 CaFAA23     | Lipid fatty-acid and isoprenoid metabolism ""       | CELLULAR TRANSPORT AND TRANSPORT MECHANISMS | SUBCELLULAR LO                |
| CA4312 | 1.0 | 1.1 | 0.8 | 1.0 | IPF2122    | complemer similar to thiamin pyro             | orf19.4112 | 2122 IPF2122     | Metabolism molecular_function unknown               |                                             |                               |
| CA4313 | 1.8 | 1.1 | 0.9 | 1.2 | IPF2121    | 13624191..unknown function                    | orf19.4110 | 2121 IPF2121     | CELL CYCLE AND DNA PROCESSING                       | SUBCELLULAR LOCALISATION                    |                               |
| CA4314 | 0.4 | 0.8 | 0.7 | 1.2 | PMT4       | 13627689..Mannosyltransferase (l              | orf19.4109 | 2115 CaPMT4      | C-compour transferase activity                      |                                             |                               |
| CA4315 | 1.2 | 0.9 | 1.1 | 0.8 | PPX1       | 13630268..Exopolyphosphatase (l               | orf19.4107 | 2112 CaPPX1      | Phosphate hydrolase activity                        |                                             |                               |
| CA4316 | 0.9 | 0.9 | 1.1 | 1.1 | IPF2111    | complemer unknown function                    | orf19.4106 | 2111 IPF2111     | UNCLASSI molecular_function unknown                 |                                             |                               |

|        |     |     |     |     |           |                                                        |             |       |            |                           |                                                    |                                               |
|--------|-----|-----|-----|-----|-----------|--------------------------------------------------------|-------------|-------|------------|---------------------------|----------------------------------------------------|-----------------------------------------------|
| CA4317 | 1.3 | 0.9 | 1.0 | 0.8 | IPF2109   | 13632715..unknown function                             | orf19.4105  | 2109  | IPF2109    | UNCLASSI                  | molecular_function                                 | unknown                                       |
| CA4318 | 0.8 | 0.9 | 0.9 | 1.0 | IPF2106   | complemer unknown function                             | orf19.4104  | 2106  | IPF2106    | No significant S.c. match |                                                    |                                               |
| CA4319 | 1.1 | 1.1 | 0.9 | 1.0 | RPN10     | complemer Protein degradation (b)                      | orf19.4102  | 2104  | CaRPN10    | PROTEIN I                 | peptidase activity                                 |                                               |
| CA4320 | 2.3 | 1.2 | 1.2 | 1.0 | ECM17     | complemer Putative sulfite reducta                     | orf19.4099  | 2102  | CaECM17    | Amino acid transporter    | activity                                           |                                               |
| CA4321 | 0.8 | 1.0 | 1.3 | 1.0 | KAR3.53   | 13639735..Kinesin-related protein                      | orf19.4100  | 2100  | CaKAR3.5   | CELL CYC                  | motor activity                                     |                                               |
| CA4322 | 0.9 | 1.0 | 1.0 | 1.1 | IPF2097   | complemer unknown function                             | orf19.4097  | 2097  | IPF2097    | TRANSCRIPTION             |                                                    |                                               |
| CA4323 | 1.4 | 1.1 | 1.0 | 0.8 | IPF2096   | complemer putative acyltransferas                      | orf19.4096  | 2096  | IPF2096    | CLASSIFIC                 | transferase activity                               |                                               |
| CA4324 | 1.3 | 1.0 | 0.9 | 0.7 | IPF2095   | complemer unknown function                             | orf19.4095  | 2095  | IPF2095    | No significant S.c. match |                                                    |                                               |
| CA4325 | 0.9 | 1.1 | 0.8 | 1.2 | IPF2094   | 13646015..unknown function                             | orf19.4094  | 2094  | IPF2094    | No significant S.c. match |                                                    |                                               |
| CA4326 | 1.2 | 1.2 | 1.3 | 1.0 | IPF2093   | 13646785..nuclear protein of unkr                      | orf19.4093  | 2093  | IPF2093    | UNCLASSI                  | molecular_function                                 | unknown                                       |
| CA4327 | 0.9 | 1.1 | 1.2 | 1.1 | IPF2091   | 13648774..unknown function                             | orf19.4092  | 2091  | IPF2091    | UNCLASSI                  | molecular_function                                 | unknown                                       |
| CA4328 | 1.3 | 1.0 | 1.0 | 0.9 | IPF2090   | complemer similar to Saccharomy                        | orf19.4091  | 2090  | IPF2090    | TRANSCR                   | transcription regulator                            | activity                                      |
| CA4329 | 0.8 | 0.9 | 0.8 | 0.9 | VMA21     | complemer Vacuolar H <sup>+</sup> -ATPase assembly (b) |             | 2089  | CaVMA21    | PROTEIN I                 | molecular_function                                 | unknown                                       |
| CA4330 | 1.0 | 1.2 | 1.3 | 1.0 | IPF2087   | 13651418..unknown function                             | orf19.4090  | 2087  | IPF2087    | UNCLASSIFIED              | PROTEINS                                           |                                               |
| CA4331 | 1.0 | 1.1 | 1.0 | 0.8 | IPF2086   | 13653176..unknown function                             | orf19.4089  | 2086  | IPF2086    | CELL CYC                  | chaperone activity                                 |                                               |
| CA4332 | 0.8 | 1.1 | 0.7 | 1.0 | GLO2      | 13654688..Glyoxalase II (hydroxy;                      | orf19.4088  | 2085  | CaGLO2     | Amino acid                | hydrolase activity                                 |                                               |
| CA4333 | 1.1 | 0.9 | 1.1 | 1.1 | IPF2083   | complemer unknown function                             | orf19.4086  | 2083  | IPF2083    | UNCLASSI                  | molecular_function                                 | unknown                                       |
| CA4334 | 1.3 | 1.1 | 0.9 | 0.7 | IPF2082   | 13656458..unknown function                             | orf19.4085  | 2082  | IPF2082    | CELL RESCUE               | DEFENSE AND VIRULENCE ""                           | TRANSPORT FACILITATION                        |
| CA4335 | 0.8 | 1.0 | 1.1 | 1.0 | GAL83     | 13657376..Glucose repression pr                        | orf19.4084  | 2079  | CaGAL83    | C-compou                  | protein kinase activity                            |                                               |
| CA4336 | 1.2 | 1.5 | 0.9 | 1.6 | DDR48     | complemer stress protein (by hom                       | orf19.4082  | 2075  | CaDDR48    | CELL RESCUE               | DEFENSE AND VIRULENCE ""                           | UNCLASSIFIED PROTEINS                         |
| CA4337 | 1.0 | 1.1 | 0.8 | 1.1 | IPF2071   | complemer unknown function                             | orf19.4079  | 2071  | IPF2071    | No significant S.c. match |                                                    |                                               |
| CA4338 | 1.1 | 1.0 | 0.9 | 0.9 | IPF3616   | 13666944..Unknown function                             | orf19.6709  | 3616  | IPF3616    | UNCLASSI                  | molecular_function                                 | unknown                                       |
| CA4339 | 1.7 | 1.2 | 1.0 | 0.8 | IPF3618   | complemer Unknown function                             | orf19.6710  | 3618  | IPF3618    | UNCLASSIFIED              | PROTEINS                                           |                                               |
| CA4340 | 0.7 | 1.1 | 0.9 | 1.2 | IPF3621   | complemer unknown function                             | orf19.6712  | 3621  | IPF3621    | CLASSIFIC                 | molecular_function                                 | unknown                                       |
| CA4341 | 1.3 | 1.1 | 1.3 | 0.9 | IPF3624   | complemer unknown function                             | orf19.6713  | 3624  | IPF3624    | No significant S.c. match |                                                    |                                               |
| CA4342 | 1.1 | 1.1 | 1.2 | 1.2 | IPF3629   | complemer RNA (guanine-N7-) me                         | orf19.6716  | 3629  | IPF3629    | TRANSCR                   | transferase activity                               |                                               |
| CA4343 | 1.1 | 1.1 | 0.8 | 0.8 | IPF3630   | complemer unknown function                             | orf19.6717  | 3630  | IPF3630    | UNCLASSI                  | molecular_function                                 | unknown                                       |
| CA4344 | 0.8 | 1.3 | 0.8 | 1.1 | IPF3631   | 13680189..unknown function                             | orf19.6718  | 3631  | IPF3631    | No significant S.c. match |                                                    |                                               |
| CA4345 | 1.1 | 1.3 | 1.0 | 1.0 | IPF3633.3 | complemer similar to Saccharomy                        | orf19.6719  | 3633  | IPF3633.3  | CELL CYC                  | transcription regulator                            | activity                                      |
| CA4346 | 0.2 | 0.5 | 0.4 | 0.9 | IPF3634   | complemer unknown function                             | orf19.6720  | 3634  | IPF3634    | UNCLASSI                  | molecular_function                                 | unknown                                       |
| CA4347 | 0.7 | 1.0 | 1.1 | 1.1 | IPF3636   | complemer similar to Saccharomy                        | orf19.6722  | 3636  | IPF3636    | CELL CYC                  | DNA binding                                        |                                               |
| CA4348 | 0.9 | 1.1 | 0.8 | 1.2 | IPF3638   | 13689201..unknown function                             | orf19.6723  | 3638  | IPF3638    | UNCLASSIFIED              | PROTEINS                                           |                                               |
| CA4349 | 1.3 | 0.9 | 1.2 | 1.2 | FUM12.5F  | 13691337..Fumarate hydratase, 5                        | orf19.6724  | 3640  | CaFUM12.   | ENERGY                    | SUBCELLULAR LOCALISATION                           |                                               |
| CA4350 | 0.8 | 0.7 | 0.9 | 1.2 | FUM12.53f | 13692040..Fumarate hydratase, internal fragme          |             | 18225 | CaFUM12.   | ENERGY                    | SUBCELLULAR LOCALISATION                           |                                               |
| CA4351 | 0.9 | 0.6 | 1.2 | 1.3 | FUM12.3F  | 13692234..Fumarate hydratase, 3                        | orf19.6725  | 3641  | CaFUM12.   | ENERGY                    | SUBCELLULAR LOCALISATION                           |                                               |
| CA4352 | 0.9 | 1.1 | 1.2 | 1.1 | IPF3642   | 13693048..Unknown function                             | orf19.6726  | 3642  | IPF3642    | TRANSCR                   | DNA binding                                        |                                               |
| CA4353 | 1.2 | 1.1 | 0.9 | 0.9 | IPF3645   | 13694115..similar to Saccharomy                        | orf19.6727  | 3645  | IPF3645    | TRANSCR                   | transferase activity                               |                                               |
| CA4354 | 1.0 | 1.1 | 1.2 | 1.2 | IPF3647   | complemer unknown function                             | orf19.6729  | 3647  | IPF3647    | TRANSCRIPTION             | PROTEIN SYNTHESIS                                  |                                               |
| CA4355 | 1.4 | 1.0 | 1.0 | 0.9 | IPF3649   | complemer unknown function                             | orf19.6730  | 3649  | IPF3649    | UNCLASSI                  | molecular_function                                 | unknown                                       |
| CA4356 | 0.6 | 0.9 | 1.2 | 1.2 | IPF3651   | complemer unknown function                             |             | 3651  | IPF3651    | No significant S.c. match |                                                    |                                               |
| CA4357 | 1.3 | 0.9 | 1.0 | 1.2 | IPF19800  | 13701331..unknown function                             | orf19.6732  | 19800 | IPF19800   | UNCLASSI                  | molecular_function                                 | unknown                                       |
| CA4358 | 1.3 | 1.2 | 1.0 | 0.9 | IPF6067   | complemer putative transcription f                     | orf19.6734  | 6067  | IPF6067    | TRANSCRIPTION             | SUBCELLULAR LOCALISATION                           |                                               |
| CA4359 | 0.9 | 1.1 | 0.9 | 1.2 | IPF6054   | 13713281..unnown function                              | orf19.6736  | 6054  | IPF6054    | UNCLASSI                  | molecular_function                                 | unknown                                       |
| CA4360 | 1.2 | 0.8 | 0.8 | 0.8 | IPF6050   | 13717654..unknown function                             | orf19.6737  | 6050  | IPF6050    | No significant S.c. match |                                                    |                                               |
| CA4361 | 2.0 | 1.6 | 1.4 | 1.0 | IPF16104  | 13723251..unknown function                             | orf19.13096 | 16104 | IPF16104   | TRANSCR                   | molecular_function                                 | unknown                                       |
| CA4362 | 0.9 | 0.9 | 1.1 | 0.7 | ATP2      | 13726192..F1F0-ATPase comple                           | orf19.5653  | 5264  | CaATP2     | ENERGY                    | (transporter                                       | activity                                      |
| CA4363 | 1.3 | 0.8 | 0.9 | 0.8 | STE24     | 13728012..zinc metallo-protease l                      | orf19.5654  | 5265  | CaSTE24    | PROTEIN I                 | peptidase activity                                 |                                               |
| CA4364 | 0.9 | 1.2 | 1.2 | 1.1 | IPF5268.E | complemer choline monooxygenas                         | orf19.5655  | 5266  | IPF5268.ex | No significant S.c. match |                                                    |                                               |
| CA4365 | 1.1 | 0.9 | 1.0 | 1.2 | IPF5268.E | complemer choline monooxygenas                         | orf19.5656  | 5268  | IPF5268.ex | No significant S.c. match |                                                    |                                               |
| CA4366 | 0.9 | 0.9 | 1.0 | 1.0 | SWI1      | complemer Transcription regulatio                      | orf19.5657  | 5271  | CaSWI1     | C-compou                  | transcription regulator                            | activity                                      |
| CA4367 | 1.2 | 1.0 | 0.9 | 0.9 | MNN10     | complemer galactosyltransferase (                      | orf19.5658  | 5272  | CaMNN10    | C-compou                  | transferase activity                               |                                               |
| CA4368 | 0.8 | 1.0 | 1.1 | 1.0 | PEX10.3   | complemer peroxisomal assembly                         | orf19.5660  | 5275  | CaPEX10.3  | PROTEIN I                 | protein binding                                    |                                               |
| CA4369 | 0.6 | 1.1 | 1.0 | 1.1 | TIM11     | complemer subunit e of mitochondrial F1F0-ATF          |             | 5277  | CaTIM11    | ENERGY ""                 | PROTEIN FATE (folding modification destination) "" | CELLULAR TRANSPORT AND TRANSPORT MECHANISMS S |
| CA4370 | 1.2 | 1.3 | 1.1 | 0.9 | IPF5279   | 13737863..unknown function                             | orf19.5661  | 5279  | IPF5279    | ENERGY                    | protein phosphatase activity                       |                                               |
| CA4371 | 1.4 | 1.0 | 1.0 | 0.8 | PEP7      | 13739024..vacuolar segregation p                       | orf19.5662  | 5281  | CaPEP7     | PROTEIN I                 | molecular_function                                 | unknown                                       |
| CA4372 | 1.3 | 1.0 | 1.1 | 0.7 | IPF5282   | complemer unknown function                             | orf19.5663  | 5282  | IPF5282    | UNCLASSI                  | transporter                                        | activity                                      |
| CA4373 | 0.8 | 0.7 | 1.3 | 1.0 | IPF5287   | 13742925..signal transduction pro                      | orf19.5664  | 5287  | IPF5287    | CELL CYC                  | protein binding                                    |                                               |
| CA4374 | 1.2 | 1.0 | 0.9 | 0.9 | IPF5288   | 13744929..Unknown function                             | orf19.5665  | 5288  | IPF5288    | UNCLASSI                  | molecular_function                                 | unknown                                       |
| CA4375 | 0.8 | 0.9 | 1.0 | 0.8 | IPF11309  | 13746058..unknown function                             | orf19.5666  | 11309 | IPF11309   | TRANSCR                   | transcription regulator                            | activity                                      |
| CA4376 | 0.8 | 1.0 | 1.0 | 1.0 | IPF11307  | 13747288..unknown function                             | orf19.5667  | 11307 | IPF11307   | CELL RES                  | transporter                                        | activity                                      |
| CA4377 | 0.8 | 1.0 | 1.0 | 1.0 | IPF11301  | 13749902..unknown function                             | orf19.5669  | 11301 | IPF11301   | SUBCELLULAR               | LOCALISATION                                       |                                               |
| CA4378 | 1.0 | 1.0 | 1.0 | 1.1 | IPF11299  | complemer unknown function                             | orf19.5671  | 11299 | IPF11299   | UNCLASSI                  | molecular_function                                 | unknown                                       |
| CA4379 | 0.9 | 1.0 | 0.9 | 0.9 | MEP2      | 13754336..high affinity low capaci                     | orf19.5672  | 12738 | CaMEP2     | CELLULAF                  | transporter                                        | activity                                      |
| CA4380 | 0.9 | 0.9 | 1.0 | 0.9 | IPF12736  | complemer unknown function                             | orf19.5673  | 12736 | IPF12736   | TRANSPORT                 | FACILITATION                                       |                                               |
| CA4381 | 0.4 | 0.3 | 0.3 | 0.9 | IPF20169  | complemer unknown function                             | orf19.5674  | 20169 | IPF20169   | No significant S.c. match |                                                    |                                               |
| CA4382 | 1.1 | 1.1 | 1.0 | 1.0 | IPF8576   | complemer similar to Saccharomy                        | orf19.5675  | 8576  | IPF8576    | UNCLASSI                  | hydrolase activity                                 |                                               |
| CA4383 | 1.1 | 1.0 | 0.9 | 1.0 | IPF8573   | complemer unknown function                             | orf19.13121 | 8573  | IPF8573    | UNCLASSI                  | molecular_function                                 | unknown                                       |
| CA4384 | 1.0 | 1.1 | 1.1 | 1.1 | DUR34     | 13767917..Urea transport protein                       | orf19.13122 | 8570  | CaDUR34    | REGULATION                | OF/INTERACTION WITH CELLULAR ENVIRONMENT           | SUBCELLULAR LOCALISATION TRANSPORT FACILI     |
| CA4385 | 0.8 | 1.1 | 1.0 | 1.3 | CCT6      | complemer component of chapero                         | orf19.3126  | 14978 | CaCCT6     | PROTEIN I                 | chaperone activity                                 |                                               |
| CA4386 | 0.8 | 0.9 | 1.1 | 1.0 | IPF12412  | 13777240..unknown function                             | orf19.3125  | 12412 | IPF12412   | TRANSCRIPTION             | SUBCELLULAR LOCALISATION                           |                                               |
| CA4387 | 0.8 | 1.0 | 1.2 | 0.9 | MAP1      | complemer methionine aminopepti                        | orf19.3124  | 12414 | CaMAP1     | PROTEIN I                 | peptidase activity                                 |                                               |

|        |     |     |     |     |            |                                                 |                  |                                                                                                             |
|--------|-----|-----|-----|-----|------------|-------------------------------------------------|------------------|-------------------------------------------------------------------------------------------------------------|
| CA4388 | 1.2 | 1.1 | 1.0 | 0.8 | IPF12416.3 | complemer cytidine deaminase, 3-prime end (by   | 12416 IPF12416.3 | Nucleotide hydrolase activity                                                                               |
| CA4389 | 0.9 | 0.9 | 1.0 | 1.2 | RPT5       | 13780287..26S proteasome regul orf19.3123       | 12419 CaRPT5     | PROTEIN lpeptidase activity                                                                                 |
| CA4390 | 1.0 | 0.9 | 1.3 | 1.1 | HOD1       | complemer regulator of G2/M progression (by h   | 12420 CaHOD1     | No significant S.c. match                                                                                   |
| CA4391 | 0.7 | 0.9 | 1.0 | 1.1 | ARR3       | 13782944..involved in arsenite tra orf19.3122   | 12422 CaARR3     | SUBCELLL transporter activity                                                                               |
| CA4392 | 0.9 | 0.9 | 1.1 | 0.9 | IPF12303   | 13784434.. glutathione-S-transfera orf19.3121   | 12303 IPF12303   | Nitrogen and sulphur metabolism                                                                             |
| CA4393 | 1.1 | 0.9 | 0.9 | 0.7 | IPF12300   | 13785662..unknown function orf19.3120           | 12300 IPF12300   | TRANSPORT FACILITATION                                                                                      |
| CA4394 | 0.2 | 0.1 | 0.1 | 0.4 | IPF12297   | complemer mycelial surface antige orf19.3117    | 12297 IPF12297   | No significant S.c. match                                                                                   |
| CA4395 | 0.8 | 1.1 | 1.0 | 1.2 | EXM2       | complemer EXIT with Mitosis (by h orf19.3116    | 12295 CaEXM2     | TRANSCR RNA binding                                                                                         |
| CA4396 | 1.2 | 1.0 | 1.3 | 1.2 | IPF12294   | complemer unknown function orf19.3115           | 12294 IPF12294   | SUBCELLULAR LOCALISATION                                                                                    |
| CA4397 | 1.4 | 1.1 | 1.3 | 1.2 | IPF14369   | 13791307..unknown function orf19.3114           | 14369 IPF14369   | Nucleotide lyase activity                                                                                   |
| CA4398 | 1.7 | 6.2 | 2.2 | 1.7 | ZRT1       | complemer high-affinity zinc transp orf19.3112  | 14367 CaZRT1     | REGULATION OF/INTERACTION WITH CELLULAR ENVIRONMENT TRANSPORT FACILITATION                                  |
| CA4399 | 1.5 | 3.8 | 1.7 | 4.3 | PRA1       | 13794736..pH-regulated antigen orf19.3111       | 14364 CaPRA1     | UNCLASSImolecular_function unknown                                                                          |
| CA4400 | 1.3 | 1.1 | 0.8 | 1.0 | IPF14362   | 13796197..unknown function orf19.3110           | 8781 IPF14362    | UNCLASSIFIED PROTEINS                                                                                       |
| CA4401 | 0.9 | 1.1 | 1.1 | 1.0 | IPF8780    | 13798417..unknown function orf19.3109           | 8780 IPF8780     | No significant S.c. match                                                                                   |
| CA4402 | 1.3 | 1.2 | 0.9 | 0.9 | MGT1       | complemer O6-methylguanine DN.orf19.3108        | 8778 CaMGT1      | CELL CYC DNA binding                                                                                        |
| CA4403 | 1.1 | 1.1 | 0.9 | 1.1 | IPF8777    | complemer unknown function orf19.3107           | 8777 IPF8777     | No significant S.c. match                                                                                   |
| CA4404 | 0.9 | 0.7 | 0.9 | 1.0 | MET16      | 13801316..3-phosphoadenylylsul orf19.3106       | 8775 CaMET16     | Amino acid oxidoreductase activity                                                                          |
| CA4405 | 1.5 | 1.1 | 1.0 | 0.9 | IPF8773    | 13802252..putative cytochrome P.orf19.3105      | 8773 IPF8773     | CELL RESCUE DEFENSE AND VIRULENCE ""CELL FATE CONTROL OF CELLULAR ORGANIZATION                              |
| CA4406 | 1.2 | 1.0 | 1.0 | 0.9 | YDC1       | 13804150..alkaline dihydrocerami orf19.3104     | 8772 CaYDC1      | Lipid fatty-ε hydrolase activity                                                                            |
| CA4407 | 0.9 | 1.8 | 1.2 | 1.3 | RPO31      | 13805409..DNA-directed RNA pol orf19.3103       | 13155 CaRPO31    | TRANSCR nucleotidyltransferase activity                                                                     |
| CA4408 | 1.0 | 0.9 | 0.9 | 0.9 | CTA6.3     | 13809882..unknown function, 3-pr orf19.3102     | 13152 CaCTA6.3   | No significant S.c. match                                                                                   |
| CA4409 | 1.0 | 1.2 | 1.0 | 0.9 | IPF13151   | complemer unknown function orf19.3100           | 13151 IPF13151   | CELLULAR TRANSPORT AND TRANSPORT MECHANISMS SUBCELLULAR LOCALISATION                                        |
| CA4410 | 0.9 | 0.9 | 1.2 | 1.2 | TRP4       | complemer Anthranilate phosphori orf19.3099     | 1754 CaTRP4      | Amino acid transferase activity                                                                             |
| CA4411 | 1.9 | 1.0 | 1.0 | 0.8 | BRR2       | complemer RNA helicase-related f orf19.3098     | 1751 CaBRR2      | TRANSCR RNA binding,helicase activity                                                                       |
| CA4412 | 0.2 | 0.3 | 0.2 | 0.7 | PDA1       | complemer Pyruvate dehydrogena orf19.3097       | 1749 CaPDA1      | C-compour oxidoreductase activity                                                                           |
| CA4413 | 1.2 | 0.7 | 0.9 | 1.1 | MSH2       | complemer DNA mismatch repair orf19.3093        | 1746 CaMSH2      | CELL CYC DNA binding                                                                                        |
| CA4415 | 1.4 | 1.1 | 1.1 | 0.9 | HIK1.3EOC  | 13826051..histidine kinase, 3-prime end         | 11890 CaHIK1.3e  | CELL CYCLE AND DNA PROCESSING TRANSCRIPTION CELLULAR COMMUNICATION/SIGNAL TRANSDUCTION MECH                 |
| CA4416 | 1.2 | 1.4 | 1.3 | 1.2 | IPF11888   | 13830957..unknown function orf19.5180           | 11888 IPF11888   | CELL RES oxidoreductase activity                                                                            |
| CA4417 | 1.3 | 0.9 | 0.8 | 0.8 | LIP5       | complemer Secretory lipase orf19.5179           | 5395 CaLIP5      | Other virulence attributes                                                                                  |
| CA4418 | 0.7 | 0.4 | 0.7 | 1.3 | ERG5       | complemer C-22 sterol desaturase orf19.5178     | 5398 CaERG5      | Lipid fatty-acid and isoprenoid metabolism """"CELL RESCUE DEFENSE AND VIRULENCE ""SUBCELLULAR LOCALISATION |
| CA4419 | 1.3 | 0.9 | 1.0 | 1.1 | IFA6       | 13840496..Unknown function orf19.5177           | 5401 CaIFA6      | UNCLASSIFIED PROTEINS                                                                                       |
| CA4420 | 1.6 | 1.1 | 1.0 | 1.0 | SSM4       | complemer involved in mRNA turn orf19.5175      | 5404 CaSSM4      | TRANSCR ligase activity                                                                                     |
| CA4421 | 0.9 | 1.1 | 1.0 | 0.9 | TAF19      | complemer TBP-associated factor orf19.5174      | 5405 CaTAF19     | TRANSCR transcription regulator activity                                                                    |
| CA4422 | 0.8 | 1.0 | 0.9 | 0.9 | LIP9.EXON  | complemer secretory lipase 9, exo orf19.5173    | 5406 CaLIP9.exc  | Other virulence attributes                                                                                  |
| CA4423 | 1.0 | 1.1 | 1.0 | 1.2 | LIP9.EXON  | complemer secretory lipase 9, exo orf19.5172    | 5407 CaLIP9.ext  | Other virulence attributes                                                                                  |
| CA4424 | 1.1 | 0.6 | 1.0 | 1.0 | PMT1       | complemer mannosyltransferase orf19.5171        | 5408 CaPMT1      | C-compour transferase activity                                                                              |
| CA4425 | 1.4 | 5.0 | 4.0 | 1.1 | ENA21.3    | 13855072..P-type ATPase, 3-prim orf19.5170      | 5411 CaENA21.3   | REGULATION OF/INTERACTION WITH CELLULAR ENVIRONMENT TRANSPORT FACILITATION                                  |
| CA4426 | 1.5 | 1.1 | 1.0 | 1.0 | AMD21      | 13858996..amidase (by homology orf19.5169       | 5587 CaAMD21     | Nitrogen and sulphur metabolism                                                                             |
| CA4427 | 0.8 | 1.0 | 1.3 | 0.9 | IPF5584    | complemer unknown function orf19.5168           | 5584 IPF5584     | UNCLASSImolecular_function unknown                                                                          |
| CA4428 | 0.8 | 1.0 | 0.9 | 0.9 | IFM1       | complemer translation initiation fac orf19.5167 | 5581 CaIFM1      | PROTEIN :RNA binding                                                                                        |
| CA4429 | 1.0 | 1.0 | 0.9 | 0.9 | DBF4       | complemer regulatory subunit for orf19.5166     | 5578 CaDBF4      | CELL CYC protein kinase activity                                                                            |
| CA4430 | 1.4 | 1.1 | 1.1 | 0.8 | IPF5577    | complemer unknown function orf19.5165           | 5577 IPF5577     | UNCLASSImolecular_function unknown                                                                          |
| CA4431 | 1.2 | 0.8 | 1.0 | 0.9 | ECM39      | 13868170..cell wall biogenesis by orf19.5164    | 5575 CaECM39     | CONTROL transferase activity                                                                                |
| CA4432 | 1.7 | 1.1 | 1.1 | 0.9 | IPF5574    | complemer unknown function orf19.5163           | 5574 IPF5574     | CELL CYC molecular_function unknown                                                                         |
| CA4433 | 1.0 | 0.9 | 1.0 | 1.2 | BCK1       | 13873674..serine/threonine protei orf19.5162    | 5572 CaBCK1      | CELL CYC protein kinase activity,signal transducer activity                                                 |
| CA4434 | 0.9 | 0.9 | 0.9 | 0.8 | MRPL49     | complemer ribosomal protein mito orf19.5161     | 5569 CaMRPL49    | PROTEIN :structural molecule activity                                                                       |
| CA4435 | 1.6 | 1.1 | 1.0 | 1.1 | SAP190     | 13879174..phosphatase associate orf19.5160      | 5567 CaSAP190    | CELL CYC protein phosphatase activity                                                                       |
| CA4436 | 2.3 | 1.0 | 1.1 | 0.9 | IPF13868   | complemer unknown function orf19.5159           | 13868 IPF13868   | UNCLASSImolecular_function unknown                                                                          |
| CA4437 | 1.1 | 1.0 | 1.1 | 0.9 | IPF13867   | 13883597..unknown function orf19.5158           | 13867 IPF13867   | CELLULAR TRANSPORT AND TRANSPORT MECHANISMS SUBCELLULAR LOCALISATION                                        |
| CA4438 | 1.4 | 0.9 | 1.1 | 0.8 | IPF13866   | 13884332..unknown function orf19.5157           | 13866 IPF13866   | UNCLASSIFIED PROTEINS                                                                                       |
| CA4439 | 0.6 | 0.7 | 0.7 | 0.9 | IPF13865   | 13885085..unknown function orf19.5156           | 13865 IPF13865   | UNCLASSImolecular_function unknown                                                                          |
| CA4440 | 1.2 | 0.9 | 0.9 | 0.9 | IPF13864   | complemer similar to Saccharomy orf19.5155      | 13864 IPF13864   | C-compour molecular_function unknown                                                                        |
| CA4441 | 1.5 | 3.8 | 1.0 | 1.2 | IPF2268.3  | complemer unknown function, 3-prime end         | 2268 IPF2268.3   | No significant S.c. match                                                                                   |
| CA4442 | 1.7 | 1.1 | 1.4 | 1.4 | IPF3537    | complemer unknown function orf19.6838           | 3537 IPF3537     | ENERGY SUBCELLULAR LOCALISATION                                                                             |
| CA4443 | 1.2 | 1.1 | 1.3 | 0.8 | IPF3535    | complemer unknown function orf19.6840           | 3535 IPF3535     | No significant S.c. match                                                                                   |
| CA4444 | 1.1 | 1.0 | 0.9 | 0.9 | IPF3533    | complemer putative GDP/GTP exc orf19.6842       | 3533 IPF3533     | UNCLASSIenzyme regulator activity                                                                           |
| CA4445 | 1.2 | 0.9 | 0.9 | 1.0 | IPF3530    | 13913089..unknown function orf19.6843           | 3530 IPF3530     | No significant S.c. match                                                                                   |
| CA4446 | 2.0 | 4.5 | 1.4 | 1.3 | ICL1       | 13915305..Isocitrate lyase orf19.6844           | 3527 CaICL1      | C-compour lyase activity                                                                                    |
| CA4447 | 0.9 | 1.0 | 1.1 | 1.0 | IPF3523    | 13917397..unknown function orf19.6845           | 3523 IPF3523     | UNCLASSIFIED PROTEINS                                                                                       |
| CA4448 | 0.9 | 0.9 | 0.9 | 0.9 | PHO85      | complemer Negative regulator of F orf19.6846    | 3522 CaPHO85     | Phosphate protein kinase activity                                                                           |
| CA4449 | 1.2 | 0.9 | 1.0 | 1.0 | IPF3520    | complemer unknown function orf19.6847           | 3520 IPF3520     | UNCLASSImolecular_function unknown                                                                          |
| CA4450 | 1.2 | 1.2 | 1.1 | 1.1 | IPF3518    | complemer similar to Saccharomy orf19.6848      | 3518 IPF3518     | PROTEIN Imolecular_function unknown                                                                         |
| CA4451 | 1.0 | 0.8 | 1.0 | 1.0 | ELC1       | 13925378..Transcription elongatio orf19.6849    | 3516 CaELC1      | CELL CYC transcription regulator activity                                                                   |
| CA4452 | 0.6 | 1.0 | 1.2 | 1.0 | IPF3514    | 13926226..unknown function orf19.6850           | 3514 IPF3514     | UNCLASSImolecular_function unknown                                                                          |
| CA4453 | 0.9 | 1.1 | 1.1 | 0.9 | CHL4       | complemer chromosome segregat orf19.6851        | 15162 CaCHL4     | CELL CYC DNA binding                                                                                        |
| CA4454 | 0.6 | 1.1 | 1.0 | 1.0 | IPF15160   | complemer unknown function orf19.6852           | 15160 IPF15160   | UNCLASSImolecular_function unknown                                                                          |
| CA4455 | 0.9 | 0.9 | 1.2 | 1.0 | IPF8454    | complemer unknown function orf19.6853           | 8454 IPF8454     | No significant S.c. match                                                                                   |
| CA4456 | 1.8 | 1.2 | 1.7 | 1.0 | ATP1.EXO   | 13935906..F1FO-ATPase complex, F1 alpha su      | 8458 CaATP1.ex   | ENERGY CELLULAR TRANSPORT AND TRANSPORT MECHANISMS REGULATION OF/INTERACTION WITH CELLULAR I                |
| CA4457 | 1.0 | 1.4 | 1.3 | 0.5 | ATP1.EXO   | 13936228..F1FO-ATPase complex orf19.6854        | 8460 CaATP1.ex   | ENERGY C transporter activity                                                                               |
| CA4458 | 0.5 | 0.6 | 0.8 | 1.0 | IPF8464    | 13938534..unknown function orf19.6855           | 8464 IPF8464     | No significant S.c. match                                                                                   |
| CA4459 | 1.2 | 0.9 | 0.9 | 0.9 | NSP49.3F   | complemer nucleopopin, 3-prime e orf19.6856     | 8467 CaNSP49.3   | TRANSCR structural molecule activity                                                                        |

|        |     |     |     |     |           |                                                          |                 |                                                                                                          |
|--------|-----|-----|-----|-----|-----------|----------------------------------------------------------|-----------------|----------------------------------------------------------------------------------------------------------|
| CA4460 | 0.8 | 0.9 | 0.9 | 1.1 | NSP49.5F  | complemer nuclear pore protein, 5 orf19.6857             | 8469 CaNSP49.5F | No significant S.c. match                                                                                |
| CA4461 | 0.8 | 0.9 | 0.9 | 0.9 | IPF8470   | complemer unknown function orf19.6858                    | 8470 IPF8470    | UNCLASSI molecular_function unknown                                                                      |
| CA4462 | 1.3 | 1.0 | 1.0 | 0.8 | IPF17251  | complemer unknown function orf19.6859                    | 17251 IPF17251  | No significant S.c. match                                                                                |
| CA4463 | 0.9 | 1.1 | 1.0 | 1.2 | PIS1      | 13947475..CDP diacylglycerol--in orf19.6860              | 9827 CaPIS1     | Lipid fatty- $\epsilon$ transferase activity                                                             |
| CA4464 | 1.4 | 1.0 | 1.0 | 0.9 | IPF9828   | complemer similar to Saccharomy orf19.6861               | 9828 IPF9828    | CELL CYC protein binding                                                                                 |
| CA4465 | 1.2 | 0.9 |     | 1.1 | IPF9829   | complemer unknown function orf19.6862                    | 9829 IPF9829    | UNCLASSI molecular_function unknown                                                                      |
| CA4466 | 1.5 | 1.0 | 1.1 | 0.9 | VPH1      | complemer H+-ATPase V0 domain orf19.6863                 | 9830 CaVPH1     | PROTEIN I transporter activity                                                                           |
| CA4467 | 1.8 | 1.2 | 1.1 | 1.0 | IPF9833   | 13957835..unknown function orf19.6864                    | 9833 IPF9833    | No significant S.c. match                                                                                |
| CA4468 | 1.9 | 1.1 | 1.0 | 0.9 | TOR2.53E1 | 13960608..phosphatidylinositol 3- orf19.1905             | 9721 CaTOR2.5   | Lipid fatty-acid and isoprenoid metabolism ""CELL CYCLE AND DNA PROCESSING CELLULAR COMMUNICATION/SIGNAL |
| CA4469 | 1.6 | 1.0 | 1.4 | 0.9 | TOR2.3F   | 13962745..phosphatidylinositol 3- orf19.1903             | 9719 CaTOR2.3   | Lipid fatty- $\epsilon$ protein binding                                                                  |
| CA4470 | 1.2 | 1.2 |     | 1.1 | IPF9717   | 13967770..unknown function orf19.1902                    | 9717 IPF9717    | UNCLASSI molecular_function unknown                                                                      |
| CA4471 | 0.8 | 1.0 | 1.0 | 1.1 | MCM3      | 13969807..replication initiation prc orf19.1901          | 9716 CaMCM3     | CELL CYC DNA binding                                                                                     |
| CA4472 | 0.9 | 0.8 | 1.2 | 0.9 | IPF6444   | 13972714..putative methyltransfer orf19.1900             | 6444 IPF6444    | UNCLASSI transferase activity                                                                            |
| CA4473 | 1.1 | 0.9 | 1.0 | 0.9 | IPF6447   | 13974538..unknown function orf19.1897                    | 6447 IPF6447    | UNCLASSIFIED PROTEINS                                                                                    |
| CA4474 | 1.2 | 1.4 | 0.6 | 1.1 | SSC1      | 13976149..Mitochondrial heat sho orf19.1896              | 6450 CaSSC1     | PROTEIN I enzyme regulator activity                                                                      |
| CA4475 | 0.9 | 1.0 | 0.9 | 1.0 | IPF6455   | complemer unknown function orf19.1893                    | 6455 IPF6455    | No significant S.c. match                                                                                |
| CA4476 | 1.2 | 1.8 | 1.1 | 1.2 | 01-Apr    | complemer aspartyl protease orf19.1891                   | 6456 CaAPR1     | PROTEIN I peptidase activity                                                                             |
| CA4477 | 1.1 | 1.1 | 1.1 | 1.0 | IPF6459   | 13983877..unknown function orf19.1890                    | 6459 IPF6459    | UNCLASSI molecular_function unknown                                                                      |
| CA4478 | 1.5 | 0.9 | 0.8 | 0.8 | IPF6461   | 13985699..unknown function orf19.1889                    | 6461 IPF6461    | C-compour molecular_function unknown                                                                     |
| CA4479 | 0.6 | 1.2 | 0.7 | 1.1 | URH1      | complemer Uridine ribohydrolase ( orf19.1888             | 6462 CaURH1     | Nucleotide hydrolase activity                                                                            |
| CA4480 | 0.5 | 0.9 | 1.1 | 1.0 | IPF6464   | complemer putative triacylglycerol orf19.1887            | 6464 IPF6464    | Lipid fatty- $\epsilon$ molecular_function unknown                                                       |
| CA4481 | 1.3 | 1.0 |     | 1.0 | IPF9150   | 13992547..similar to Saccharomy orf19.9441               | 9150 IPF9150    | PROTEIN I transcription regulator activity                                                               |
| CA4482 | 0.5 | 1.0 | 1.1 | 0.9 | IPF9154   | 13993921..similar to Saccharomy orf19.1883               | 9154 IPF9154    | SUBCELLL molecular_function unknown                                                                      |
| CA4483 | 0.4 | 1.1 | 0.9 | 0.9 | IPF9156   | 13997689..unknown function orf19.1881                    | 9156 IPF9156    | UNCLASSI molecular_function unknown                                                                      |
| CA4484 | 1.0 | 0.9 | 1.0 | 1.1 | HEM15     | 14000215..ferrochelatase precurs orf19.1880              | 9158 CaHEM15    | Metabolism lyase activity                                                                                |
| CA4485 | 1.1 | 0.9 |     | 1.0 | IPF9160   | complemer similar to Saccharomy orf19.1878               | 9160 IPF9160    | TRANSCR transcription regulator activity                                                                 |
| CA4486 | 1.1 | 1.1 | 1.1 | 1.0 | IPF9162   | 14002693..unknown function orf19.1877                    | 9162 IPF9162    | UNCLASSI molecular_function unknown                                                                      |
| CA4487 | 1.0 | 0.8 | 1.2 | 1.1 | IPF4039   | complemer similar to Saccharomy orf19.1876               | 4039 IPF4039    | CELL CYC RNA binding                                                                                     |
| CA4488 | 1.1 | 0.8 | 1.0 | 1.1 | MEK1.3F   | complemer serine/threonine protei orf19.1875             | 4041 CaMEK1.3   | CELL CYC protein kinase activity                                                                         |
| CA4490 | 1.3 | 1.5 |     | 1.3 | IPF4045   | complemer unknown function orf19.9428                    | 4045 IPF4045    | No significant S.c. match                                                                                |
| CA4491 | 1.0 | 1.0 | 1.0 | 1.2 | SWR1      | 14009069..putative DNA helicase orf19.9427               | 4050 CaSWR1     | TRANSCR helicase activity                                                                                |
| CA4492 | 0.8 | 0.9 | 1.0 | 0.9 | RNR22     | 14015299..ribonucleoside-diphosp orf19.1868              | 4053 CaRNR22    | Nucleotide metabolism CELL CYCLE AND DNA PROCESSING SUBCELLULAR LOCALISATION                             |
| CA4493 | 1.3 | 1.1 | 1.0 | 1.1 | IPF4055   | 14016968..unknown function orf19.1867                    | 4055 IPF4055    | CELL RESCUE DEFENSE AND VIRULENCE ""SUBCELLULAR LOCALISATION                                             |
| CA4494 | 0.6 | 0.9 | 0.9 | 0.9 | VMA1      | 14018455..vacuolar ATPase V1 d orf19.1866                | 4056 CaVMA1     | No signific transporter activity                                                                         |
| CA4495 | 0.7 | 1.1 | 0.9 | 1.1 | IPF4059   | complemer aldehyde dehydrogena orf19.1865                | 4059 IPF4059    | ENERGY C molecular_function unknown                                                                      |
| CA4496 | 0.6 | 1.0 | 0.9 | 0.9 | IPF4062   | complemer unknown function orf19.9420                    | 4062 IPF4062    | UNCLASSI molecular_function unknown                                                                      |
| CA4497 | 0.9 | 1.1 | 1.0 | 0.9 | IPF4064   | 14023894..unknown function orf19.9419                    | 4064 IPF4064    | No significant S.c. match                                                                                |
| CA4498 | 1.0 | 1.1 | 0.8 | 1.3 | IPF11315  | 14026958..unknown function orf19.8143                    | 11315 IPF11315  | CELLULAF molecular_function unknown                                                                      |
| CA4499 | 1.0 | 1.0 | 0.9 | 1.0 | IPF11316  | complemer unknown function orf19.511                     | 11316 IPF11316  | UNCLASSI molecular_function unknown                                                                      |
| CA4500 | 1.1 | 0.6 | 1.0 | 1.2 | IPF11319  | 14033050..unknown function orf19.8141                    | 11319 IPF11319  | UNCLASSIFIED PROTEINS                                                                                    |
| CA4501 | 1.0 | 0.8 | 0.5 | 0.8 | QDR1      | 14035767..putative antibiotic resis orf19.8138           | 16422 CaQDR1    | CELL RES transporter activity                                                                            |
| CA4502 | 0.4 | 0.8 | 0.5 | 0.9 | IPF10391  | complemer Similar to dnaJ protein orf19.8136             | 10391 IPF10391  | CELL CYC enzyme regulator activity                                                                       |
| CA4503 | 1.1 | 1.0 | 1.0 | 0.9 | SRV2      | complemer adenylate cyclase-ass orf19.505                | 10389 CaSRV2    | CELLULAF protein binding                                                                                 |
| CA4504 | 1.3 | 1.4 | 1.1 | 1.1 | ARP5      | 14041534..actin-related protein (b orf19.504             | 10388 CaARP5    | SUBCELLL molecular_function unknown                                                                      |
| CA4505 | 1.2 | 1.4 | 1.2 | 1.0 | NOP2      | complemer nucleolar protein (by h orf19.501              | 15042 CaNOP2    | TRANSCR transferase activity                                                                             |
| CA4506 | 1.6 | 1.0 | 1.1 | 0.9 | GCD10     | 14046116..translation initiation fac orf19.500           | 15038 CaGCD10   | PROTEIN I transferase activity                                                                           |
| CA4507 | 1.2 | 1.0 | 1.2 | 1.0 | IPF20015  | complemer unknown function orf19.499                     | 20015 IPF20015  | UNCLASSI transferase activity                                                                            |
| CA4508 | 0.9 | 1.2 | 0.6 | 1.1 | NAM9      | complemer mitochondrial ribosom: orf19.498               | 8974 CaNAM9     | PROTEIN I structural molecule activity                                                                   |
| CA4509 | 0.7 | 0.9 | 1.1 | 0.9 | IPF8973   | 14050477..unknown function orf19.497                     | 8973 IPF8973    | UNCLASSI molecular_function unknown                                                                      |
| CA4510 | 1.2 | 1.0 | 0.9 | 0.8 | IPF8970   | 14052090..similar to Saccharomy orf19.496                | 8970 IPF8970    | CELL CYCLE AND DNA PROCESSING SUBCELLULAR LOCALISATION                                                   |
| CA4511 | 0.9 | 1.0 | 1.1 | 1.1 | IPF8966   | complemer unknown function orf19.8124                    | 8966 IPF8966    | UNCLASSI transporter activity,RNA binding                                                                |
| CA4512 | 0.4 | 0.4 | 0.6 | 0.7 | RPL15B    | 14057436..ribosomal protein L15. orf19.8123              | 8963 CaRPL15B   | PROTEIN I RNA binding                                                                                    |
| CA4513 | 2.4 | 1.2 | 1.2 | 1.0 | ADE17     | 14058839..5-aminoimidazole-4-ca orf19.492                | 14907 CaADE17   | Nucleotide hydrolase activity                                                                            |
| CA4514 | 0.6 | 0.5 | 0.7 | 1.1 | IPF20016  | 14061041..similar to Saccharomy orf19.491                | 20016 IPF20016  | PROTEIN I transporter activity                                                                           |
| CA4515 | 0.7 | 0.9 | 0.8 | 0.9 | IPF16652  | complemer unknown function orf19.490                     | 16652 IPF16652  | UNCLASSI transferase activity                                                                            |
| CA4516 | 0.9 | 1.0 | 1.0 |     | IPF18207  | 14064587..unknown function orf19.489                     | 18207 IPF18207  | UNCLASSI molecular_function unknown                                                                      |
| CA4517 | 1.5 | 0.6 | 1.1 | 0.8 | MEX67     | 14065491..poly(A)+RNA binding p orf19.488                | 7086 CaMEX67    | TRANSCR protein binding,RNA binding                                                                      |
| CA4518 | 0.8 | 1.0 | 1.0 | 1.0 | SPT14     | 14067741..N-acetylglucosaminyl- $\gamma$ orf19.487       | 7087 CaSPT14    | C-compour transferase activity                                                                           |
| CA4519 | 0.8 | 1.1 | 0.9 | 1.1 | IPF7088   | complemer similar to Saccharomy orf19.486                | 7088 IPF7088    | CELL CYC protein binding                                                                                 |
| CA4520 | 0.8 | 1.1 | 0.9 | 1.0 | CDC31     | 14071993..spindle pole body com orf19.485                | 7089 CaCDC31    | CELL CYC structural molecule activity                                                                    |
| CA4521 | 0.7 | 1.0 |     | 1.2 | MRPL40    | 14073012..Putative mitochondrial orf19.484               | 7091 CaMRPL40   | PROTEIN I structural molecule activity                                                                   |
| CA4522 | 1.5 | 1.1 | 1.1 | 0.8 | RPT4      | complemer 26S proteasome regul orf19.482                 | 7093 CaRPT4     | TRANSCR peptidase activity                                                                               |
| CA4523 | 0.8 | 1.1 | 1.0 | 1.1 | GCD1      | 14075715..translation initiation fac orf19.481           | 7094 CaGCD1     | SUBCELLL translation regulator activity                                                                  |
| CA4524 | 0.8 | 1.0 | 1.0 | 1.3 | IPF7097   | complemer unknown function orf19.480                     | 7097 IPF7097    | UNCLASSI molecular_function unknown                                                                      |
| CA4525 | 0.8 | 0.9 | 0.8 | 0.9 | SEC22     | 14078810..synaptobrevin-type protein transport orf19.479 | 7098 CaSEC22    | CELLULAF transporter activity                                                                            |
| CA4526 | 1.2 | 0.9 | 1.0 | 0.8 | MON1.3    | 14079483..unknown function, 3-pr orf19.8109              | 7100 CaMON1.3   | UNCLASSI molecular_function unknown                                                                      |
| CA4527 | 1.0 | 0.6 | 1.1 | 1.0 | IPF4398   | 14082622..unknown function orf19.9054                    | 4398 IPF4398    | UNCLASSIFIED PROTEINS                                                                                    |
| CA4528 | 0.6 | 0.8 | 0.7 | 1.2 | STT3      | 14085326..oligosaccharyl transfer orf19.1478             | 4396 CaSTT3     | C-compour transferase activity                                                                           |
| CA4529 | 1.8 | 1.1 | 1.4 | 0.9 | IPF4395   | 14088050..unknown function orf19.1477                    | 4395 IPF4395    | UNCLASSI molecular_function unknown                                                                      |
| CA4530 | 0.9 |     | 1.0 | 1.0 | IME4      | complemer positive transcription fe orf19.1476           | 4394 CaIME4     | TRANSCR transferase activity                                                                             |
| CA4531 | 1.0 | 1.0 | 1.3 | 1.0 | SLA1      | complemer cytoskeleton assembly orf19.1474               | 4392 CaSLA1     | PROTEIN I protein binding                                                                                |

|        |     |     |     |     |           |                                                 |              |                |                                                                                                         |
|--------|-----|-----|-----|-----|-----------|-------------------------------------------------|--------------|----------------|---------------------------------------------------------------------------------------------------------|
| CA4532 | 1.7 | 1.1 | 1.3 | 0.9 | IPF4386   | complemer unknown function                      | orf19.1473   | 4386 IPF4386   | CLASSIFICATION NOT YET CLEAR-CUT                                                                        |
| CA4533 | 1.0 | 0.9 | 1.2 | 0.9 | COX4      | complemer cytochrome-c oxidase                  | orf19.1471   | 20017 CaCOX4   | ENERGY ̵oxidoreductase activity                                                                         |
| CA4534 | 0.3 | 0.5 | 0.8 | 1.0 | RPS26A    | 14098607..ribosomal protein S26.                | orf19.1470   | 4380 CaRPS26A  | PROTEIN ̵structural molecule activity                                                                   |
| CA4535 | 1.0 | 0.9 | 1.2 | 1.0 | CDC55     | 14100236..B subunit of protein ph               | orf19.1468   | 4377 CaCDC55   | CELL CYC protein phosphatase activity                                                                   |
| CA4536 | 0.5 | 1.9 | 1.2 | 1.5 | COX13     | complemer cytochrome-c oxidase                  | orf19.1467   | 4376 CaCOX13   | ENERGY ̵enzyme regulator activity                                                                       |
| CA4537 | 1.2 | 1.1 | 1.0 | 0.9 | YNT2      | complemer suppressor of rna12/yr                | orf19.1466   | 4375 CaYNT2    | TRANSCR hydrolase activity                                                                              |
| CA4538 | 0.7 | 0.8 | 0.9 | 0.9 | IPF20018  | complemer unknown function                      | orf19.1465   | 20018 IPF20018 | UNCLASSIFIED PROTEINS                                                                                   |
| CA4539 | 1.3 | 1.2 | 1.2 | 0.9 | IFQ4      | complemer Unknown function                      | orf19.1464   | 6260 CaIFQ4    | UNCLASSIFIED PROTEINS                                                                                   |
| CA4540 | 0.9 | 1.1 | 0.8 | 1.1 | SMP2      | complemer Involved in plasmid ma                | orf19.1462   | 6259 CaSMP2    | ENERGY Cmolecular_function unknown                                                                      |
| CA4541 | 1.3 | 2.8 | 1.5 | 0.9 | IPF6257   | complemer unknown function                      | orf19.1461   | 6257 IPF6257   | No significant S.c. match                                                                               |
| CA4542 | 1.2 | 1.7 | 1.1 | 1.0 | IPF6255   | 14111834..unknown function                      | orf19.1460   | 6255 IPF6255   | UNCLASSIhydrolase activity                                                                              |
| CA4543 | 1.2 | 1.0 | 1.1 | 0.8 | PPE1      | complemer Ribosomal protein of t                | orf19.1459   | 6254 CaPPE1    | PROTEIN ̵hydrolase activity                                                                             |
| CA4544 | 1.3 | 1.0 | 1.0 | 1.0 | IPF6252   | 14115326..similar to Saccharomy                 | orf19.1458   | 6252 IPF6252   | TRANSCR hydrolase activity                                                                              |
| CA4545 | 1.1 | 1.0 | 1.3 | 1.0 | SSL1      | 14116432..TFIIH subunit (transcrij              | orf19.1457   | 6250 CaSSL1    | CELL CYC transcription regulator activity                                                               |
| CA4546 | 1.8 | 1.1 | 1.1 | 0.9 | SPT5      | complemer Transcription elongatio               | orf19.1453   | 6247 CaSPT5    | CELL CYC transcription regulator activity                                                               |
| CA4547 | 1.2 | 0.9 | 1.0 | 1.0 | SRB9      | complemer DNA-directed RNA pol                  | orf19.1451   | 6242 CaSRB9    | C-compour transcription regulator activity                                                              |
| CA4548 | 1.2 | 1.0 | 1.2 | 1.0 | IPF7862   | 14126680..unknown function                      | orf19.1450   | 7862 IPF7862   | PROTEIN FATE [folding modification destination]                                                         |
| CA4549 | 1.1 | 0.9 | 1.2 | 1.1 | IPF7863   | 14128068..unknown function                      | orf19.1449   | 7863 IPF7863   | Nitrogen ar molecular_function unknown                                                                  |
| CA4550 | 1.0 | 0.8 | 0.9 | 1.1 | DYN2.3    | 14129143..Dynein light chain 1, cytosolic, 3-pr |              | 7865 CaDYN2.3  | CELLULAFmotor activity                                                                                  |
| CA4551 | 0.7 | 0.9 | 1.1 | 1.0 | APT1      | complemer adenine phosphoribos                  | orf19.1448   | 7867 CaAPT1    | Nucleotide transferase activity                                                                         |
| CA4552 | 1.3 | 0.9 | 1.0 | 0.9 | IPF7869   | 14130639..unknown function                      | orf19.1447   | 7869 IPF7869   | CONTROL OF CELLULAR ORGANIZATION                                                                        |
| CA4553 | 1.0 | 0.7 | 0.9 | 1.0 | CYB1      | 14136327..G2/Mitotic-specific cyc               | orf19.1446   | 7873 CaCYB1    | CELL CYC protein kinase activity,enzyme regulator activity                                              |
| CA4554 | 0.7 | 1.0 | 1.2 | 1.0 | IPF7874   | 14138304..similar to Saccharomy                 | orf19.1445   | 7874 IPF7874   | TRANSCR molecular_function unknown                                                                      |
| CA4555 | 0.7 | 1.0 | 0.9 | 1.1 | IPF17555  | complemer unknown function, 3-pr                | orf19.9019   | 17555 IPF17555 | CELLULAFprotein binding                                                                                 |
| CA4556 | 0.6 | 1.1 | 1.0 | 1.2 | IPF8044   | complemer similar to Saccharomy                 | orf19.6866   | 8044 IPF8044   | TRANSCR RNA binding                                                                                     |
| CA4557 | 0.7 | 0.9 | 0.9 | 0.8 | IPF8043   | 14144722..unknown function                      | orf19.6867   | 8043 IPF8043   | UNCLASSIFIED PROTEINS                                                                                   |
| CA4558 | 1.0 | 0.8 | 1.1 | 1.0 | GRP5      | 14145467..dihydroflavonol-4-redu                | orf19.6868   | 8042 CaGRP5    | Metabolism of vitamins cofactors and prosthetic groups                                                  |
| CA4559 | 1.7 | 1.0 | 1.2 | 0.8 | IPF8041   | complemer putative mitochondrial                | orf19.6869   | 8041 IPF8041   | PROTEIN FATE [folding modification destination] ""SUBCELLULAR LOCALISATION                              |
| CA4560 | 0.9 | 0.9 | 0.7 | 0.9 | IPF8038   | 14150732..unknown function                      | orf19.6871   | 8038 IPF8038   | UNCLASSImolecular_function unknown                                                                      |
| CA4561 | 0.7 | 0.8 | 0.8 | 1.0 | IPF8031   | complemer unknown function                      | orf19.6872   | 8031 IPF8031   | SUBCELLLmolecular_function unknown                                                                      |
| CA4562 | 0.5 | 0.5 | 0.7 | 1.2 | RPS8A     | complemer ribosomal protein (by h               | orf19.6873   | 6565 CaRPS8A   | PROTEIN ̵structural molecule activity                                                                   |
| CA4563 | 1.5 | 1.0 | 1.1 | 0.8 | IPF6566   | 14158941..unknown function                      |              | 6566 IPF6566   | UNCLASSImolecular_function unknown                                                                      |
| CA4564 | 1.4 | 1.0 | 1.1 | 1.0 | IPF6572   | 14165740..unknown function                      | orf19.6874   | 6572 IPF6572   | CELL CYCLE AND DNA PROCESSING                                                                           |
| CA4565 | 0.8 | 1.0 | 0.9 | 1.2 | VPS35     | 14168313..Protein-sorting protein,              | orf19.6875   | 6573 CaVPS35   | PROTEIN Imolecular_function unknown                                                                     |
| CA4566 |     | 1.4 | 2.9 | 1.3 | IPF19801  | 14172755..unknown function                      | orf19.6877   | 19801 IPF19801 | No significant S.c. match                                                                               |
| CA4567 | 1.3 | 0.8 | 1.0 | 1.1 | IPF9555   | complemer unknown function                      | orf19.6879   | 9555 IPF9555   | TRANSCR RNA binding                                                                                     |
| CA4568 | 0.7 | 1.0 | 0.8 | 1.0 | IPF9554   | 14177046..unknown function                      | orf19.6880   | 9554 IPF9554   | UNCLASSImolecular_function unknown                                                                      |
| CA4569 | 1.1 | 1.1 | 1.1 | 0.9 | IPF9552   | complemer unknown function                      | orf19.6881   | 9552 IPF9552   | TRANSCR RNA binding                                                                                     |
| CA4570 | 0.3 | 0.4 |     | 1.1 | IPF9550   | 14181143..similar to Saccharomy                 | orf19.6882   | 9550 IPF9550   | ENERGY " oxidoreductase activity                                                                        |
| CA4571 | 0.2 | 0.6 | 0.8 | 1.0 | RPL33.3   | complemer ribosomal protein L35a, 3-prime end   |              | 9548 CaRPL33.3 | PROTEIN ̵structural molecule activity                                                                   |
| CA4572 | 1.3 | 0.9 | 1.0 | 1.1 | KES1      | complemer involved in ergosterol l              | orf19.6883   | 9434 CaKES1    | Lipid fatty-acid and isoprenoid metabolism ""CELLULAR TRANSPORT AND TRANSPORT MECHANISMS SUBCELLULAR LO |
| CA4573 | 0.8 | 1.0 | 0.8 | 0.9 | IPF9431   | complemer unknown function                      | orf19.6884   | 9431 IPF9431   | UNCLASSImolecular_function unknown                                                                      |
| CA4574 | 1.2 | 1.1 | 1.0 | 1.2 | IPF9430   | 14188237..similar to Saccharomy                 | orf19.6885   | 9430 IPF9430   | CELL CYC molecular_function unknown                                                                     |
| CA4575 | 1.3 | 1.1 | 1.0 | 1.1 | IPF9428   | 14190289..unknown function                      | orf19.6886   | 9428 IPF9428   | UNCLASSImolecular_function unknown                                                                      |
| CA4576 | 1.1 | 1.0 | 1.4 | 1.1 | IPF9425.3 | 14194146..unknown function, 3-pr                | orf19.6888   | 9425 IPF9425.3 | No significant S.c. match                                                                               |
| CA4577 | 0.5 | 0.8 | 0.9 | 0.9 | MKK2      | complemer Protein kinase of MEK                 | orf19.6889   | 14309 CaMKK2   | CELL CYC protein kinase activity                                                                        |
| CA4578 | 1.3 | 1.0 | 0.9 | 1.2 | RFC1      | complemer DNA replication factor                | orf19.6891   | 14308 CaRFC1   | CELL CYCLE AND DNA PROCESSING SUBCELLULAR LOCALISATION                                                  |
| CA4579 | 1.0 | 1.0 | 1.0 | 1.1 | IPF2234   | 14220274..unknown function                      | orf19.6898   | 2234 IPF2234   | No significant S.c. match                                                                               |
| CA4580 | 0.8 | 1.0 | 1.1 | 0.9 | IPF2233   | complemer unknown function                      |              | 2233 IPF2233   | No significant S.c. match                                                                               |
| CA4581 | 1.4 | 1.2 | 0.9 | 0.8 | IPF2232   | complemer unknown function                      | orf19.6899   | 2232 IPF2232   | UNCLASSIFIED PROTEINS                                                                                   |
| CA4582 | 0.9 | 1.1 | 1.2 | 1.1 | MDM12     | 14224083..Involved in mitochondr                | orf19.6900   | 2231 CaMDM12   | SUBCELLLmolecular_function unknown                                                                      |
| CA4583 | 1.0 | 0.9 | 1.1 | 1.2 | IPF2229   | 14225693..unknown function                      | orf19.6901   | 2229 IPF2229   | UNCLASSImolecular_function unknown                                                                      |
| CA4584 | 0.7 | 1.1 | 1.0 | 1.0 | IPF2228   | complemer similar to Saccharomy                 | orf19.6902   | 2228 IPF2228   | TRANSCR RNA binding,helicase activity                                                                   |
| CA4585 | 0.9 | 1.1 | 0.9 | 0.8 | IPF2227   | complemer unknown function                      | orf19.6903   | 2227 IPF2227   | TRANSCR nucleotidyltransferase activity                                                                 |
| CA4586 | 0.5 | 1.0 |     | 1.0 | GCN3      | 14230237..Translation initiation fa             | orf19.6904   | 2224 CaGCN3    | PROTEIN ̵translation regulator activity                                                                 |
| CA4587 | 0.4 | 1.1 | 0.8 | 1.0 | IPF2223   | complemer unknown function                      | orf19.6905   | 2223 IPF2223   | UNCLASSImolecular_function unknown                                                                      |
| CA4588 | 0.6 | 0.2 | 0.4 | 0.5 | BEL1.EXO  | 14233745..protein of the 40S ribos              | orf19.6906   | 2221 CaBEL1.ex | ENERGY Fmolecular_function unknown                                                                      |
| CA4589 | 0.2 | 0.3 | 0.6 | 0.5 | BEL1.EXO  | 14234532..protein of the 40S ribosomal subunit  |              | 2220 CaBEL1.ex | ENERGY PROTEIN SYNTHESIS SUBCELLULAR LOCALISATION                                                       |
| CA4590 | 0.6 | 0.7 | 0.9 | 1.1 | IPF2218   | complemer unknown function                      | orf19.6907   | 2218 IPF2218   | UNCLASSImolecular_function unknown                                                                      |
| CA4591 | 1.3 | 1.1 | 1.1 | 0.8 | IPF2216   | complemer putative folypolygluta                | orf19.6908   | 2216 IPF2216   | Metabolism ligase activity                                                                              |
| CA4592 | 1.3 | 1.0 | 1.1 | 0.8 | IPF2215   | 14239185..unknown function                      | orf19.6909   | 2215 IPF2215   | TRANSCR transcription regulator activity                                                                |
| CA4593 | 0.9 | 0.9 | 1.0 | 0.9 | IPF2214   | complemer unknown function                      | orf19.6910   | 2214 IPF2214   | UNCLASSIDNA binding                                                                                     |
| CA4594 | 0.9 | 1.0 | 0.9 | 0.8 | IPF2212   | 14241952..unknown function                      | orf19.6912   | 2212 IPF2212   | Lipid fatty-acid and isoprenoid metabolism ""SUBCELLULAR LOCALISATION                                   |
| CA4595 | 1.2 | 1.0 | 1.0 | 1.0 | GCN2      | complemer Ser/thr protein kinase                | (orf19.6913) | 2209 CaGCN2    | PROTEIN ̵protein kinase activity                                                                        |
| CA4596 | 0.9 | 0.8 | 1.3 | 1.2 | MRE11     | 14249502..DNA repair and meiotic                | orf19.6915   | 2205 CaMRE11   | CELL CYC protein binding                                                                                |
| CA4597 | 0.6 | 1.0 | 0.8 | 1.0 | ATP11     | complemer F1FO-ATPase complex                   | orf19.6916   | 2203 CaATP11   | PROTEIN ̵chaperone activity                                                                             |
| CA4598 | 1.1 | 1.0 | 1.0 | 1.0 | IPF20019  | complemer unknown function                      | orf19.6917   | 20019 IPF20019 | UNCLASSImolecular_function unknown                                                                      |
| CA4599 | 1.6 | 1.0 | 1.0 | 0.9 | IPF2200   | 14253886..Unknown function                      | orf19.6918   | 2200 IPF2200   | No significant S.c. match                                                                               |
| CA4600 | 1.4 | 1.1 | 1.0 | 0.9 | IPF2199   | 14257208..unknown function                      | orf19.6919   | 2199 IPF2199   | No significant S.c. match                                                                               |
| CA4601 | 1.9 | 1.2 | 1.4 | 0.9 | IPF2195   | 14261733..unknown function                      | orf19.6920   | 2195 IPF2195   | No significant S.c. match                                                                               |
| CA4602 | 0.6 | 0.9 | 1.0 | 1.2 | IPF6231   | 14266071..unknown function                      | orf19.10802  | 6231 IPF6231   | TRANSCR oxidoreductase activity                                                                         |

|        |     |     |     |     |          |                                      |             |       |          |                                                                                                             |
|--------|-----|-----|-----|-----|----------|--------------------------------------|-------------|-------|----------|-------------------------------------------------------------------------------------------------------------|
| CA4603 | 0.3 | 0.8 | 0.8 | 1.0 | IPF6230  | complemer unknown function           | orf19.10803 | 6230  | IPF6230  | Lipid fatty-ε oxidoreductase activity                                                                       |
| CA4604 | 0.8 | 0.9 | 0.9 | 0.8 | MBF1     | 14267840.. Multiprotein bridging fa  | orf19.3294  | 6228  | CaMBF1   | TRANSCR transcription regulator activity                                                                    |
| CA4605 | 1.5 | 1.0 | 1.0 | 0.8 | IPF6226  | complemer unknown function           | orf19.3295  | 6226  | IPF6226  | UNCLASSIFIED PROTEINS                                                                                       |
| CA4606 | 0.8 | 0.9 | 1.0 | 1.0 | IPF6224  | 14270429.. unknown function          | orf19.3296  | 6224  | IPF6224  | No significant S.c. match                                                                                   |
| CA4607 | 0.9 | 0.9 | 0.9 | 0.8 | IPF6223  | complemer unknown function           | orf19.3297  | 6223  | IPF6223  | UNCLASSI structural molecule activity                                                                       |
| CA4608 | 3.8 | 1.1 | 1.5 | 0.9 | CCH1     | 14273192.. Calcium channel prote     | orf19.3298  | 6222  | CaCCH1   | REGULATI transporter activity                                                                               |
| CA4609 | 1.3 | 1.1 | 1.0 | 0.8 | ZPR1     | complemer Zinc finger protein (by    | orf19.3300  | 6215  | CaZPR1   | UNCLASSI protein binding                                                                                    |
| CA4610 | 1.3 | 0.9 | 1.0 | 1.2 | IPF19802 | 14284224.. similar to Saccharomy     | orf19.3301  | 19802 | IPF19802 | Amino acid protein binding                                                                                  |
| CA4611 | 1.5 | 1.9 | 1.2 | 1.3 | IPF10727 | complemer unknown function           | orf19.3302  | 10727 | IPF10727 | C-compound and carbohydrate metabolism ENERGY SUBCELLULAR LOCALISATION                                      |
| CA4612 | 1.0 | 1.2 | 0.9 | 1.0 | PPM2     | complemer carboxy methyl transfe     | orf19.3303  | 10724 | CaPPM2   | PROTEIN I transferase activity                                                                              |
| CA4613 | 1.4 | 1.1 | 1.0 | 0.8 | IPF7950  | complemer similar to Saccharomy      | orf19.3304  | 7950  | IPF7950  | CELL CYC RNA binding                                                                                        |
| CA4614 | 1.3 | 1.4 | 1.1 | 1.4 | IPF7952  | complemer unknown function           | orf19.3305  | 7952  | IPF7952  | Lipid fatty-acid and isoprenoid metabolism ""TRANSCRIPTION                                                  |
| CA4615 | 1.2 | 1.0 | 1.0 | 0.9 | IPF7955  | complemer DNA binding protein (b     | orf19.3306  | 7955  | IPF7955  | CELL CYC DNA binding                                                                                        |
| CA4616 | 1.0 | 0.9 | 1.0 | 1.0 | IPF5761  | complemer flavin-containing mono     | orf19.3307  | 5761  | IPF5761  | Nitrogen ar oxidoreductase activity                                                                         |
| CA4617 | 0.8 | 1.2 | 1.3 | 1.0 | STB5     | 14302298.. SIN3 binding protein (t   | orf19.3308  | 5760  | CaSTB5   | TRANSCR DNA binding,transcription regulator activity                                                        |
| CA4618 | 0.9 | 1.0 | 1.2 | 1.0 | IPF5757  | 14304763.. unknown function          | orf19.3309  | 5757  | IPF5757  | No significant S.c. match                                                                                   |
| CA4619 | 0.7 | 1.3 | 1.0 | 1.0 | IPF5756  | complemer unknown function           | orf19.3310  | 5756  | IPF5756  | No significant S.c. match                                                                                   |
| CA4620 | 1.4 | 1.0 | 0.9 | 0.9 | IFD3     | 14308373.. OXIDOREDUCTASE (          | orf19.3311  | 5754  | CaIFD3   | C-compound and carbohydrate metabolism ENERGY                                                               |
| CA4621 | 0.6 | 1.0 | 1.0 | 1.0 | IPF5753  | 14309660.. unknown function          | orf19.3312  | 5753  | IPF5753  | UNCLASSI molecular_function unknown                                                                         |
| CA4622 | 0.9 | 1.0 | 1.0 | 1.0 | IPF5751  | complemer TRAPP subunit of 20 k      | orf19.3314  | 5751  | IPF5751  | CELLULAF molecular_function unknown                                                                         |
| CA4623 | 0.7 | 0.6 | 1.0 | 1.0 | CTA9     | 14312715.. Putative transcriptional  | orf19.3315  | 5750  | CaCTA9   | No significant S.c. match                                                                                   |
| CA4624 | 1.2 | 1.0 | 0.9 | 1.0 | IPF5747  | complemer unknown function           | orf19.3318  | 5747  | IPF5747  | UNCLASSI molecular_function unknown                                                                         |
| CA4625 | 0.6 | 1.1 | 1.2 | 1.0 | IPF5742  | 14317478.. thioredoxin-like protein  | orf19.3319  | 5742  | IPF5742  | CELL CYCLE AND DNA PROCESSING ""PROTEIN FATE [folding modification destination] """"CELL RESCUE DEFENSE ANI |
| CA4626 | 0.5 | 1.2 | 1.1 | 1.0 | MRS7     | 14319204.. suppressor splicing de    | orf19.10831 | 5739  | CaMRS7   | UNCLASSI molecular_function unknown                                                                         |
| CA4627 | 1.1 | 0.8 | 0.9 | 0.8 | DUT1     | complemer dUTP pyrophosphatas        | orf19.10832 | 5736  | CaDUT1   | Nucleotide hydrolase activity                                                                               |
| CA4628 | 0.9 | 1.0 | 0.9 | 0.9 | IPF13704 | 14324792.. unknown function          |             | 13704 | IPF13704 | No significant S.c. match                                                                                   |
| CA4629 | 0.9 | 1.2 | 0.9 | 1.2 | IPF13709 | 14329052.. unknown function          | orf19.335   | 13709 | IPF13709 | CELL CYCLE AND DNA PROCESSING ""PROTEIN FATE [folding modification destination] ""SUBCELLULAR LOCALISATION  |
| CA4630 | 1.2 | 0.8 | 1.0 | 1.0 | IPF1537  | complemer putative adrenodoxin a     | orf19.336   | 1537  | IPF1537  | CLASSIFI transporter activity                                                                               |
| CA4631 | 0.8 | 1.1 | 1.0 | 1.3 | VTI1     | complemer v-SNARE involved in        | orf19.337   | 1535  | CaVTI1   | PROTEIN I transporter activity                                                                              |
| CA4632 | 3.6 | 2.6 | 1.7 | 1.5 | IPF1531  | complemer unknown function           | orf19.338   | 1531  | IPF1531  | UNCLASSI molecular_function unknown                                                                         |
| CA4633 | 1.1 | 0.7 | 1.0 | 1.1 | NDH1     | complemer Mitochondrial NADH d       | orf19.339   | 1529  | CaNDH1   | ENERGY I transporter activity                                                                               |
| CA4634 | 1.0 | 1.0 | 0.9 | 1.2 | IPF1526  | complemer unknown function           | orf19.340   | 1526  | IPF1526  | TRANSCR molecular_function unknown                                                                          |
| CA4635 | 1.2 | 1.1 | 1.1 | 1.1 | IPF1524  | complemer putative multidrug resis   | orf19.341   | 1524  | IPF1524  | CELL RESCUE DEFENSE AND VIRULENCE ""TRANSPORT FACILITATION                                                  |
| CA4636 | 1.3 | 0.9 | 1.0 | 0.8 | IPF1520  | complemer unknown function           | orf19.342   | 1520  | IPF1520  | No significant S.c. match                                                                                   |
| CA4637 | 1.7 | 1.0 | 0.9 | 0.8 | IPF1514  | complemer unknown function           | orf19.344   | 1514  | IPF1514  | No significant S.c. match                                                                                   |
| CA4638 | 1.0 | 1.1 | 0.9 | 1.1 | UGA2     | 14352333.. succinate-semialdehyc     | orf19.345   | 1510  | CaUGA2   | Amino acid oxidoreductase activity                                                                          |
| CA4639 | 2.0 | 1.4 | 1.4 | 1.4 | IPF1509  | complemer putative alanine transa    | orf19.346   | 1509  | IPF1509  | Amino acid transferase activity                                                                             |
| CA4640 | 0.8 | 0.9 | 1.3 | 1.0 | IPF1506  | 14358098.. unknown function          | orf19.347   | 1506  | IPF1506  | No significant S.c. match                                                                                   |
| CA4641 | 1.0 | 1.0 | 1.1 | 1.1 | IPF1505  | 14360691.. similar to saccharomy     | orf19.348   | 1505  | IPF1505  | C-compound and carbohydrate metabolism CELL FATE CONTROL OF CELLULAR ORGANIZATION SUBCELLULAR LOCAL         |
| CA4642 | 1.7 | 1.1 | 1.0 | 0.7 | IPF1500  | complemer similar to Saccharomy      | orf19.349   | 1500  | IPF1500  | CONTROL molecular_function unknown                                                                          |
| CA4643 | 0.7 | 1.1 | 1.0 | 0.9 | PRE9     | complemer 20S proteasome subur       | orf19.350   | 1499  | CaPRE9   | PROTEIN I peptidase activity                                                                                |
| CA4644 | 0.8 | 1.3 | 1.0 | 1.1 | IPF1497  | 14366875.. unknown function          | orf19.351   | 1497  | IPF1497  | UNCLASSI molecular_function unknown                                                                         |
| CA4645 | 1.4 | 1.1 | 0.9 | 0.8 | IPF1496  | 14367588.. unknown function          | orf19.352   | 1496  | IPF1496  | UNCLASSIFIED PROTEINS                                                                                       |
| CA4646 | 0.8 | 1.1 | 0.9 | 1.1 | IPF1495  | complemer unknown function           | orf19.353   | 1495  | IPF1495  | PROTEIN FATE [folding modification destination]                                                             |
| CA4647 | 1.3 | 1.0 | 0.8 | 0.8 | IPF1493  | 14370664.. similarity to E.coli X-Pr | orf19.354   | 1493  | IPF1493  | PROTEIN I peptidase activity                                                                                |
| CA4648 | 1.1 | 1.1 | 1.2 | 1.3 | IPF9864  | complemer similar to Saccharomy      | orf19.11914 | 9864  | IPF9864  | SUBCELLL structural molecule activity                                                                       |
| CA4649 | 0.9 | 1.0 | 1.0 | 1.1 | GPX4     | 14386219.. glutathione peroxidase    | orf19.4436  | 9860  | CaGPX4   | CELL RESCUE DEFENSE AND VIRULENCE                                                                           |
| CA4650 | 1.4 | 1.0 | 1.0 | 0.9 | ISW1.3   | complemer ATPase component of        | orf19.11916 | 9859  | CaISW1.3 | TRANSCR hydrolase activity                                                                                  |
| CA4651 | 1.5 | 0.9 | 1.1 | 0.9 | IPF3121  | complemer unknown function           | orf19.11918 | 3121  | IPF3121  | CELL CYC transcription regulator activity                                                                   |
| CA4652 | 0.9 | 0.9 | 1.4 | 1.1 | IPF3105  | complemer Unknown function           | orf19.4439  | 3105  | IPF3105  | No significant S.c. match                                                                                   |
| CA4653 | 1.1 | 1.0 | 0.9 | 0.9 | IPF3102  | complemer similar to Saccharomy      | orf19.4440  | 3102  | IPF3102  | CELLULAF transporter activity                                                                               |
| CA4654 | 1.1 | 0.9 | 1.0 | 1.0 | IPF3101  | 14418332.. unknown function          | orf19.4441  | 3101  | IPF3101  | CELL CYC DNA binding                                                                                        |
| CA4655 | 1.2 | 1.0 | 1.0 | 0.8 | IPF3098  | 14420313.. Putative mannosyltran:    | orf19.4442  | 3098  | IPF3098  | C-compour transferase activity                                                                              |
| CA4656 | 1.0 | 1.1 | 1.3 | 1.1 | IPF3095  | complemer unknown function           | orf19.4443  | 3095  | IPF3095  | REGULATI transferase activity                                                                               |
| CA4657 | 1.1 | 0.9 | 0.8 | 0.8 | IPF3094  | complemer 4-nitrophenyl phosphat     | orf19.4444  | 3094  | IPF3094  | Phosphate hydrolase activity                                                                                |
| CA4658 | 2.1 | 1.6 | 1.3 | 0.9 | IPF3092  | complemer unknown function           | orf19.4445  | 3092  | IPF3092  | No significant S.c. match                                                                                   |
| CA4659 | 1.2 | 1.1 | 1.1 | 1.1 | IPF17754 | 14428084.. low affinity high capaci  | orf19.4446  | 17754 | IPF17754 | CELLULAR TRANSPORT AND TRANSPORT MECHANISMS SUBCELLULAR LOCALISATION TRANSPORT FACILITATION                 |
| CA4660 | 0.8 | 1.0 | 0.9 | 1.0 | YMC1     | complemer mitochondrial carrier p    | orf19.4447  | 6563  | CaYMC1   | CELLULAF transporter activity                                                                               |
| CA4661 | 1.1 | 1.0 | 1.0 | 1.2 | IPF6561  | complemer unknown function           | orf19.4448  | 6561  | IPF6561  | UNCLASSI molecular_function unknown                                                                         |
| CA4662 | 0.8 | 1.0 | 1.1 | 1.1 | LYS7     | complemer Copper chaperone fo        | orf19.4449  | 6557  | CaLYS7   | PROTEIN I chaperone activity                                                                                |
| CA4663 | 1.0 | 0.9 | 0.9 | 1.1 | IPF6554  | 14437834.. unknown function          | orf19.4450  | 6554  | IPF6554  | TRANSCR molecular_function unknown                                                                          |
| CA4665 | 0.8 | 1.2 | 0.9 | 0.9 | IPF6548  | 14440757.. translation elongation f  | orf19.4451  | 6548  | IPF6548  | PROTEIN I translation regulator activity                                                                    |
| CA4666 | 1.2 | 0.9 | 1.1 | 1.1 | IPF6542  | 14445472.. unknown function          | orf19.4455  | 6542  | IPF6542  | UNCLASSI molecular_function unknown                                                                         |
| CA4667 | 0.3 | 0.3 | 0.3 | 0.8 | GAP5     | complemer General amino acid pe      | orf19.4456  | 6541  | CaGAP5   | Amino acid metabolism CELLULAR TRANSPORT AND TRANSPORT MECHANISMS SUBCELLULAR LOCALISATION TRAN             |
| CA4668 | 1.4 | 1.5 | 0.9 | 1.0 | ROM2     | complemer GDP/GTP exchange fe        | orf19.906   | 4544  | CaROM2   | C-compour signal transducer activity                                                                        |
| CA4669 | 0.7 | 0.9 | 1.0 | 1.0 | IPF4537  | 14458495.. putative permease (by     | orf19.905   | 4537  | IPF4537  | TRANSPO transporter activity                                                                                |
| CA4670 | 0.9 | 1.1 | 1.0 | 1.1 | IPF4536  | 14460038.. unknown function          | orf19.904   | 4536  | IPF4536  | Amino acid metabolism SUBCELLULAR LOCALISATION                                                              |
| CA4671 | 0.2 | 0.9 | 0.6 | 1.2 | GPM1     | 14461584.. phosphoglycerate mut      | orf19.903   | 4535  | CaGPM1   | C-compour isomerase activity                                                                                |
| CA4672 | 0.9 | 1.5 | 1.1 | 1.1 | IPF3659  | 14462809.. similar to Saccharomy     | orf19.900   | 3659  | IPF3659  | TRANSCR structural molecule activity                                                                        |
| CA4673 | 1.7 | 1.1 | 0.9 | 0.8 | IPF3661  | 14465338.. unknown function          | orf19.899   | 3661  | IPF3661  | No significant S.c. match                                                                                   |
| CA4674 | 0.8 | 0.9 | 0.8 | 1.0 | HEM2     | 14466704.. Porphobilinogen synth:    | orf19.898   | 3663  | CaHEM2   | Metabolism lyase activity                                                                                   |



|        |     |     |     |     |          |                                               |             |       |           |                                                                                                               |
|--------|-----|-----|-----|-----|----------|-----------------------------------------------|-------------|-------|-----------|---------------------------------------------------------------------------------------------------------------|
| CA4675 | 1.0 | 1.0 |     | 0.9 | IPF3664  | complemer unknown function                    | orf19.897   | 3664  | IPF3664   | CLASSIFICmolecular_function unknown                                                                           |
| CA4676 | 1.2 | 1.2 | 1.4 | 1.0 | HK1      | 14469675..Histidine kinase                    | orf19.896   | 3668  | CaHK1     | C-compound and carbohydrate metabolism CELLULAR COMMUNICATION/SIGNAL TRANSDUCTION MECHANISM ""CELL F          |
| CA4677 | 0.7 | 0.9 | 1.0 | 1.0 | HOG1     | complemer Ser/thr protein kinase              | orf19.895   | 3669  | CaHOG1    | C-compour protein kinase activity,signal transducer activity                                                  |
| CA4678 | 1.0 | 1.0 | 1.0 | 1.0 | IPF3670  | 14478750..unknown function                    | orf19.894   | 3670  | IPF3670   | CELL CYC enzyme regulator activity                                                                            |
| CA4679 | 1.5 | 1.4 | 1.2 | 1.2 | IPF3674  | 14481512..unknown function                    | orf19.893   | 3674  | IPF3674   | No significant S.c. match                                                                                     |
| CA4680 | 1.7 | 1.2 | 0.9 | 0.8 | AMD1     | 14483896..AMP deaminase (by h                 | orf19.891   | 3677  | CaAMD1    | Nucleotide hydrolase activity                                                                                 |
| CA4681 | 0.8 | 1.2 | 0.9 | 1.1 | IPF3679  | 14486567..similar to Saccharomy               | orf19.889   | 3679  | IPF3679   | TRANSCR transferase activity                                                                                  |
| CA4682 | 1.7 | 1.3 | 1.0 | 1.0 | IPF3687  | 14488504..similar to Saccharomy               | orf19.886   | 3687  | IPF3687   | PROTEIN Iprotein binding                                                                                      |
| CA4683 | 1.3 | 1.4 | 1.1 | 1.0 | HSP78.3F | complemer heat shock protein of c             | orf19.884   | 9007  | CaHSP78.3 | {PROTEIN FATE [folding modification destination] """"CELL RESCUE DEFENSE AND VIRULENCE ""SUBCELLULAR LOCALISE |
| CA4684 | 3.4 | 1.6 | 1.3 | 1.0 | HSP78.5F | complemer heat shock protein of c             | orf19.882   | 9010  | CaHSP78.5 | {PROTEIN FATE [folding modification destination] """"CELL RESCUE DEFENSE AND VIRULENCE ""SUBCELLULAR LOCALISE |
| CA4685 | 1.0 | 1.1 | 0.9 | 1.1 | IPF9013  | complemer unknown function                    | orf19.881   | 9013  | IPF9013   | CELL FATImolecular_function unknown                                                                           |
| CA4686 | 1.5 | 0.9 | 1.0 | 0.7 | IPF9015  | 14498374..unknown function                    | orf19.880   | 9015  | IPF9015   | UNCLASSImolecular_function unknown                                                                            |
| CA4687 | 1.0 | 1.1 | 1.1 | 1.0 | IPF9017  | complemer similar to Saccharomy               | orf19.879   | 9017  | IPF9017   | CELLULAFprotein binding                                                                                       |
| CA4688 | 1.4 | 1.0 | 1.0 | 0.9 | NBN1     | 14503979..involved in chromatin r             | orf19.878   | 9018  | CaNBN1    | SUBCELLLenzyme regulator activity                                                                             |
| CA4689 | 0.8 | 1.1 | 1.0 | 1.3 | IPF9020  | 14505254..unknown function                    | orf19.8495  | 9020  | IPF9020   | No significant S.c. match                                                                                     |
| CA4690 | 1.0 | 1.0 | 1.2 | 1.1 | IPF3959  | 14506309..unknown function                    | orf19.8494  | 3959  | IPF3959   | No significant S.c. match                                                                                     |
| CA4691 | 0.9 | 1.0 | 0.9 | 1.0 | IPF3958  | complemer unknown function                    | orf19.874   | 3958  | IPF3958   | UNCLASSIFIED PROTEINS                                                                                         |
| CA4692 | 1.4 | 0.9 | 1.0 | 0.8 | COX6.3   | complemer cytochrome-c oxidase subunit VI, 3- |             | 3955  | CaCOX6.3  | ENERGY Eoxidoreductase activity                                                                               |
| CA4693 | 1.1 | 1.0 | 1.2 | 0.9 | IPF3952  | complemer unknown function                    | orf19.872   | 3952  | IPF3952   | No significant S.c. match                                                                                     |
| CA4694 | 1.1 | 1.2 | 1.3 | 1.2 | IPF3950  | 14514082..unknown function                    | orf19.8490  | 3950  | IPF3950   | CELL CYCLE AND DNA PROCESSING TRANSCRIPTION SUBCELLULAR LOCALISATION                                          |
| CA4695 | 0.9 | 1.1 | 1.0 | 1.0 | IPF4229  | complemer unknown function                    | orf19.6923  | 4229  | IPF4229   | TRANSCR transcription regulator activity                                                                      |
| CA4696 | 0.1 | 0.2 | 0.4 | 0.9 | HTA1     | complemer Histone H2A (by hom                 | orf19.6924  | 4226  | CaHTA1    | TRANSCR DNA binding                                                                                           |
| CA4697 | 0.5 | 0.4 | 0.7 | 1.0 | HTB1     | 14527408..Histone H2B (by homo                | orf19.6925  | 4223  | CaHTB1    | TRANSCR DNA binding                                                                                           |
| CA4698 | 1.8 | 1.3 | 1.3 | 1.1 | CDC25    | complemer cell division cycle prote           | orf19.6926  | 4222  | CaCDC25   | Nitrogen ar enzyme regulator activity                                                                         |
| CA4699 | 0.9 | 0.8 | 1.1 | 0.9 | IPF4220  | 14532785..similar to Saccharomy               | orf19.6927  | 4220  | IPF4220   | PROTEIN Imolecular_function unknown                                                                           |
| CA4700 | 1.9 | 4.1 |     | 1.3 | SAP9     | 14535383..aspartyl proteinase 9 (l            | orf19.6928  | 4215  | CaSAP9    | PROTEIN Ipeptidase activity                                                                                   |
| CA4701 | 1.0 | 1.1 | 1.0 | 1.2 | IPF4214  | complemer unknown function                    | orf19.6929  | 4214  | IPF4214   | UNCLASSImolecular_function unknown                                                                            |
| CA4702 | 1.1 | 1.1 | 1.0 | 1.2 | IPF4213  | 14538736..unknown function                    | orf19.6930  | 4213  | IPF4213   | No significant S.c. match                                                                                     |
| CA4703 | 0.9 | 1.0 | 0.9 | 1.3 | CLP1     | 14539673..probable cleavage/po                | orf19.6931  | 4212  | CaCLP1    | TRANSCR RNA binding                                                                                           |
| CA4704 | 0.8 | 1.2 | 0.9 | 1.1 | RRD2     | complemer hosphotyrosyl phosph                | orf19.6933  | 4207  | CaRRD2    | UNCLASSIprotein phosphatase activity                                                                          |
| CA4705 | 1.0 | 1.0 | 1.2 | 1.1 | IPF4206  | 14542348..unknown function                    | orf19.6934  | 4206  | IPF4206   | CELL RESCUE DEFENSE AND VIRULENCE                                                                             |
| CA4706 | 0.5 | 0.9 | 0.9 | 1.0 | RAD53    | complemer protein kinase                      | orf19.6936  | 4205  | CaRAD53   | CELL CYC protein kinase activity                                                                              |
| CA4707 | 2.2 | 1.2 | 1.2 | 1.2 | PTR21    | complemer peptide transporter                 | orf19.6937  | 4202  | CaPTR21   | CELLULAFtransporter activity                                                                                  |
| CA4708 | 1.1 | 0.9 | 0.8 | 1.0 | MEU1     | complemer regulator of ADH2 exp               | orf19.6938  | 5890  | CaMEU1    | Nucleotide molecular_function unknown                                                                         |
| CA4709 | 1.5 | 1.4 | 1.8 | 1.2 | IPF5895  | complemer unknown function                    | orf19.6941  | 5895  | IPF5895   | UNCLASSItransferase activity                                                                                  |
| CA4710 | 0.6 | 1.1 | 1.0 | 0.8 | ORC3     | 14556103..Origin recognition com              | orf19.6942  | 5897  | CaORC3    | CELL CYC DNA binding                                                                                          |
| CA4711 | 0.9 | 1.3 | 1.1 | 1.0 | PHB1     | 14559208..Prohibitin, antiprolifera           | orf19.6944  | 5903  | CaPHB1    | CELL CYC molecular_function unknown                                                                           |
| CA4712 | 0.9 | 1.2 | 1.0 | 1.2 | GTT1.3   | complemer glutathione S-transfera             | orf19.6947  | 5904  | CaGTT1.3  | CELL RES transferase activity                                                                                 |
| CA4713 | 1.7 | 1.4 | 1.1 | 1.1 | CCC1     | complemer Transmembrane Ca2+ orf              | orf19.6948  | 5909  | CaCCC1    | REGULATI molecular_function unknown                                                                           |
| CA4714 | 1.3 | 1.0 | 0.8 | 1.1 | IPF5912  | complemer unknown function                    | orf19.6950  | 5912  | IPF5912   | UNCLASSImolecular_function unknown                                                                            |
| CA4715 | 1.6 | 1.0 | 1.1 | 1.1 | DPL1     | complemer dihydrosphingosine ph               | orf19.6951  | 16613 | CaDPL1    | Lipid fatty-ylase activity                                                                                    |
| CA4716 | 0.5 | 1.1 | 1.2 | 1.0 | IPF8666  | complemer unknown function                    | orf19.6952  | 8666  | IPF8666   | UNCLASSImolecular_function unknown                                                                            |
| CA4717 | 1.4 | 1.0 | 1.1 | 1.0 | IPF8663  | complemer Unknown function                    | orf19.6953  | 8663  | IPF8663   | UNCLASSImolecular_function unknown                                                                            |
| CA4718 | 0.9 | 1.1 | 1.0 | 1.1 | IPF8661  | complemer unknown function                    | orf19.6955  | 8661  | IPF8661   | UNCLASSI chaperone activity                                                                                   |
| CA4719 | 0.5 | 1.1 | 1.2 | 0.9 | DAL51    | complemer allantoate permease (l              | orf19.6956  | 8658  | CaDAL51   | CELLULAFtransporter activity                                                                                  |
| CA4720 | 0.5 | 1.0 | 1.3 | 1.0 | ECM18    | complemer Involved in cell wall bic           | orf19.6958  | 8656  | CaECM18   | CONTROL molecular_function unknown                                                                            |
| CA4721 | 1.2 | 1.0 | 1.0 | 0.9 | CPP1     | 14583857..probable protein-tyrosi             | orf19.12330 | 15616 | CaCPP1    | CELL CYC protein phosphatase activity                                                                         |
| CA4722 | 0.7 | 0.9 | 1.0 | 1.0 | SAC1     | complemer integral membrane pro               | orf19.12329 | 15617 | CaSAC1    | CELLULAFhydrolase activity                                                                                    |
| CA4723 | 0.9 | 1.2 | 1.0 | 0.9 | IPF18177 | 14589045..Unknown function                    | orf19.12328 | 18177 | IPF18177  | UNCLASSImolecular_function unknown                                                                            |
| CA4724 | 2.2 | 1.4 | 1.3 | 1.0 | PDC2     | 14590781..pyruvate decarboxylas               | orf19.12327 | 16151 | CaPDC2    | C-compour transcription regulator activity                                                                    |
| CA4725 | 0.8 | 0.9 | 1.1 | 1.1 | PET100   | complemer cytochrome-c oxidase assembly pro   |             | 16152 | CaPET100  | ENERGY * chaperone activity                                                                                   |
| CA4726 | 1.2 | 1.1 |     | 1.0 | IPF12255 | 14594135..unknown function                    | orf19.12326 | 12255 | IPF12255  | CLASSIFICmolecular_function unknown                                                                           |
| CA4727 | 1.1 | 1.1 | 1.0 | 0.9 | IPF12253 | complemer unknown function                    |             | 12253 | IPF12253  | No significant S.c. match                                                                                     |
| CA4728 | 1.7 | 1.1 | 0.8 | 1.1 | VPS41.3F | complemer required for the vacuol             | orf19.12322 | 12250 | CaVPS41.3 | {PROTEIN Ienzyme regulator activity                                                                           |
| CA4729 | 1.2 | 1.2 | 1.0 | 1.1 | VPS41.5F | complemer required for the vacuol             | orf19.12321 | 12249 | CaVPS41.5 | {PROTEIN FATE [folding modification destination] ""SUBCELLULAR LOCALISATION                                   |
| CA4730 | 0.9 | 1.0 | 1.3 | 1.0 | IPF7737  | 14600420..unknown function                    | orf19.12320 | 7737  | IPF7737   | No significant S.c. match                                                                                     |
| CA4731 | 1.4 | 1.0 | 1.2 | 0.9 | LIP3     | complemer Secretary lipase                    | orf19.4856  | 7736  | CaLIP3    | Other virulence attributes                                                                                    |
| CA4732 | 0.8 | 1.0 | 0.9 | 0.9 | IPF7733  | 14604926..unknown function                    | orf19.4855  | 7733  | IPF7733   | CLASSIFICmolecular_function unknown                                                                           |
| CA4733 | 1.2 | 1.0 |     | 1.0 | IPF7732  | complemer similar to Saccharomy               | orf19.4853  | 7732  | IPF7732   | TRANSCR transcription regulator activity                                                                      |
| CA4734 | 0.9 | 1.2 | 1.0 | 0.9 | TFA1     | 14608968..Large subunit of transc             | orf19.4851  | 7729  | CaTFA1    | TRANSCR transcription regulator activity                                                                      |
| CA4735 | 1.2 | 0.9 |     | 1.2 | IPF7726  | 14610999..unknown function                    | orf19.4850  | 7726  | IPF7726   | UNCLASSImolecular_function unknown                                                                            |
| CA4736 | 1.1 | 1.0 | 1.3 | 0.9 | IPF4503  | 14613866..unknown function                    | orf19.4849  | 4503  | IPF4503   | TRANSCR molecular_function unknown                                                                            |
| CA4737 | 1.2 | 1.1 | 1.0 | 0.9 | SKI3     | complemer antiviral protein                   | orf19.4848  | 4502  | CaSKI3    | CELL RES translation regulator activity                                                                       |
| CA4738 | 1.0 | 1.3 | 1.2 | 1.0 | IPF4500  | complemer putative GTP-binding p              | orf19.4846  | 4500  | IPF4500   | UNCLASSImolecular_function unknown                                                                            |
| CA4739 | 0.7 | 0.9 | 0.9 | 0.8 | IPF4498  | 14621356..unknown function                    | orf19.4845  | 4498  | IPF4498   | UNCLASSImolecular_function unknown                                                                            |
| CA4740 | 1.1 | 1.4 | 1.4 | 1.0 | IPF4497  | 14622263..unknown function                    | orf19.4844  | 4497  | IPF4497   | UNCLASSImolecular_function unknown                                                                            |
| CA4741 | 1.7 | 1.2 | 1.2 | 1.0 | IPF4496  | 14623971..unknown function                    | orf19.4843  | 4496  | IPF4496   | UNCLASSIoxidoreductase activity                                                                               |
| CA4742 | 1.4 | 1.0 | 1.1 | 0.8 | SHY1     | 14627032..SURF homologue prot                 | orf19.4841  | 4494  | CaSHY1    | ENERGY E chaperone activity                                                                                   |
| CA4743 | 1.1 | 1.0 | 0.9 | 1.2 | IPF4491  | complemer unknown function                    | orf19.4839  | 4491  | IPF4491   | UNCLASSImolecular_function unknown                                                                            |
| CA4744 | 0.9 | 0.8 | 1.0 | 0.9 | IPF4489  | complemer unknown function                    | orf19.4837  | 4489  | IPF4489   | CELL CYC structural molecule activity                                                                         |
| CA4745 | 1.3 | 1.0 |     | 0.8 | URA1     | complemer dihydroorotate dehydr               | orf19.4836  | 4487  | CaURA1    | No significant S.c. match                                                                                     |

|        |     |     |     |     |           |                                    |            |       |           |                                                                                                |
|--------|-----|-----|-----|-----|-----------|------------------------------------|------------|-------|-----------|------------------------------------------------------------------------------------------------|
| CA4746 | 1.2 | 1.0 | 0.9 | 0.9 | IPF4485   | 14632338..unknown function         | orf19.4835 | 4485  | IPF4485   | UNCLASSIRNA binding                                                                            |
| CA4747 | 1.5 | 0.9 | 1.0 | 0.8 | IPF4484   | complemer unknown function         | orf19.4834 | 4484  | IPF4484   | C-compound and carbohydrate metabolism                                                         |
| CA4748 | 6.2 | 4.5 | 3.7 | 1.6 | MLS1      | complemer malate synthase          | orf19.4833 | 4483  | CaMLS1    | C-compour transferase activity                                                                 |
| CA4749 | 0.7 | 0.4 | 0.8 | 0.8 | IPF4481   | complemer unknown function         | orf19.4831 | 4481  | IPF4481   | No significant S.c. match                                                                      |
| CA4750 | 0.9 | 0.9 | 1.0 | 0.8 | IPF4477   | complemer similar to Saccharomy    | orf19.4829 | 4477  | IPF4477   | Lipid fatty-ε molecular_function unknown                                                       |
| CA4751 | 1.0 |     | 1.3 | 1.0 | IPF11473  | complemer unknown function         | orf19.4828 | 11473 | IPF11473  | No significant S.c. match                                                                      |
| CA4752 | 1.5 | 1.5 | 1.1 | 1.5 | ADE12     | complemer adenylosuccinate syntf   | orf19.4827 | 11474 | CaADE12   | Nucleotide ligase activity                                                                     |
| CA4753 | 0.5 | 0.3 | 0.5 | 0.9 | IDH1.3    | complemer isocitrate dehydrogena   | orf19.4826 | 11475 | CaIDH1.3  | C-compour oxidoreductase activity                                                              |
| CA4754 | 1.1 | 0.9 | 1.0 | 0.9 | IPF11479  | 14649594..unknown function         | orf19.4825 | 11479 | IPF11479  | Metabolism molecular_function unknown                                                          |
| CA4755 | 1.3 | 1.1 | 1.1 | 0.9 | IPF11480  | complemer unknown function         | orf19.4824 | 11480 | IPF11480  | No significant S.c. match                                                                      |
| CA4756 | 0.8 | 0.9 | 1.3 | 1.1 | LIP6      | 14653322..Secretory lipase         | orf19.4823 | 11788 | CaLIP6    | Other virulence attributes                                                                     |
| CA4757 | 1.2 | 1.0 | 1.0 | 0.7 | LIP10     | 14655761..Secretory lipase         | orf19.4822 | 11790 | CaLIP10   | Other virulence attributes                                                                     |
| CA4758 | 1.3 | 1.2 | 1.1 | 1.0 | PPR1      | complemer transcription factor reg | orf19.3986 | 9661  | CaPPR1    | Nucleotide DNA binding,transcription regulator activity                                        |
| CA4759 | 0.9 | 1.5 | 1.0 | 1.2 | IPF9655   | 14694521..unknown function         | orf19.3988 | 9655  | IPF9655   | No significant S.c. match                                                                      |
| CA4760 | 0.9 | 1.0 | 1.0 | 0.9 | IPF9652   | 14696524..unknown function         | orf19.3990 | 9652  | IPF9652   | UNCLASSInucleotidyltransferase activity                                                        |
| CA4761 | 1.1 | 1.2 | 1.2 | 1.0 | IPF9650   | complemer lipase family protein cc | orf19.3991 | 9651  | IPF9650   | Lipid fatty-ε hydrolase activity                                                               |
| CA4762 | 0.4 | 0.8 | 0.6 | 0.8 | IPF9647   | complemer similar to Saccharomy    | orf19.3994 | 9647  | IPF9647   | C-compour transferase activity                                                                 |
| CA4763 | 0.9 |     | 1.0 | 1.1 | IPF9645   | complemer similar to Saccharomy    | orf19.3995 | 9645  | IPF9645   | PROTEIN Ipeptidase activity                                                                    |
| CA4764 | 0.6 | 0.9 | 1.2 | 1.0 | GPI10     | 14703600..required for Glycosyl P  | orf19.3996 | 19803 | CaGPI10   | Lipid fatty-ε molecular_function unknown                                                       |
| CA4765 | 0.2 | 0.6 | 0.3 | 0.2 | ADH1      | 14706501..alcohol dehydrogenase    | orf19.3997 | 17060 | CaADH1    | C-compound and carbohydrate metabolism SUBCELLULAR LOCALISATION                                |
| CA4766 | 0.9 | 1.0 | 0.9 | 0.8 | IPF13056  | complemer unknown function         | orf19.3998 | 13056 | IPF13056  | No significant S.c. match                                                                      |
| CA4767 | 1.2 | 1.0 | 1.1 | 0.8 | IPF13054  | 14708705..unknown function         | orf19.3999 | 13054 | IPF13054  | UNCLASSIFIED PROTEINS                                                                          |
| CA4768 | 0.9 | 1.0 | 0.9 | 1.1 | IPF9385   | 14717907..similar to Saccharomy    | orf19.4000 | 9385  | IPF9385   | Nucleotide DNA binding,transcription regulator activity                                        |
| CA4769 | 0.8 | 1.0 | 1.0 | 1.1 | IPF9384   | 14720421..similar to Saccharomy    | orf19.4001 | 9384  | IPF9384   | ENERGY                                                                                         |
| CA4770 | 0.8 | 1.0 | 0.9 | 0.8 | IPF9382.3 | complemer similar to Saccharomy    | orf19.4002 | 9382  | IPF9382.3 | CELL CYC protein kinase activity                                                               |
| CA4771 | 0.7 | 1.0 | 0.8 | 1.0 | IPF3336   | complemer unknown function         | orf19.4003 | 3336  | IPF3336   | CELLULAFmolecular_function unknown                                                             |
| CA4772 | 0.5 | 0.9 | 0.7 | 1.0 | CCT3      | 14726652..Chaperonin (by homok     | orf19.4004 | 3339  | CaCCT3    | PROTEIN I chaperone activity                                                                   |
| CA4773 | 0.6 | 0.9 | 1.1 | 1.0 | IPF3340   | complemer unknown function         | orf19.4005 | 3340  | IPF3340   | UNCLASSItransferase activity                                                                   |
| CA4774 | 0.8 | 1.0 | 0.9 | 1.0 | IPF3341   | 14729142..Unknown function         | orf19.4006 | 3341  | IPF3341   | Metabolism oxidoreductase activity                                                             |
| CA4775 | 1.1 | 1.0 | 1.2 | 1.1 | IPF3342   | complemer Unknown function         | orf19.4007 | 3342  | IPF3342   | UNCLASSImolecular_function unknown                                                             |
| CA4776 | 0.6 | 0.9 | 0.9 | 1.0 | CNB1      | complemer Protein phosphatase, (   | orf19.4009 | 3344  | CaCNB1    | TRANSCR protein phosphatase activity                                                           |
| CA4777 | 0.9 | 0.9 | 1.1 | 0.9 | PAN3      | 14732698..component of the Pab     | orf19.4010 | 3345  | CaPAN3    | TRANSCR RNA binding                                                                            |
| CA4778 | 1.4 | 0.9 | 1.0 | 0.8 | IFJ1      | 14736026..Unknown function         | orf19.4011 | 3348  | CaIFJ1    | UNCLASSIFIED PROTEINS                                                                          |
| CA4779 | 1.1 | 1.0 | 1.3 | 1.3 | IPF3351   | 14738137..unknown function         | orf19.4012 | 3351  | IPF3351   | UNCLASSIprotein kinase activity,enzyme regulator activity                                      |
| CA4780 | 0.6 | 0.8 | 0.9 | 0.8 | IPF3352   | complemer unknown function         | orf19.4013 | 3352  | IPF3352   | UNCLASSImolecular_function unknown                                                             |
| CA4781 | 1.1 | 1.0 | 1.0 | 1.0 | IPF3355   | 14740761..similar to Saccharomy    | orf19.4014 | 3355  | IPF3355   | CELL CYCLE AND DNA PROCESSING REGULATION OF/INTERACTION WITH CELLULAR ENVIRONMENT CELL FATE SL |
| CA4783 | 0.9 | 1.8 | 1.3 | 1.0 | IPF3358   | 14742404..ubiquinol-cytochrome-    | orf19.4016 | 3358  | IPF3358   | ENERGY ε transporter activity,oxidoreductase activity                                          |
| CA4784 | 0.9 | 0.9 | 1.0 | 1.0 | IPF3359   | complemer Unknown function         | orf19.4017 | 3359  | IPF3359   | No significant S.c. match                                                                      |
| CA4785 | 0.5 | 1.1 | 0.9 | 1.1 | IPF3361   | complemer putative mitochondrial   | orf19.4018 | 3361  | IPF3361   | PROTEIN I structural molecule activity                                                         |
| CA4786 | 0.5 | 0.7 |     | 0.6 | IPF3362   | 14747411..Unknown function         | orf19.4019 | 3362  | IPF3362   | UNCLASSImolecular_function unknown                                                             |
| CA4787 | 0.7 | 0.9 | 1.0 | 0.9 | IPF3364   | complemer Unknown function         | orf19.4021 | 3364  | IPF3364   | No significant S.c. match                                                                      |
| CA4788 | 0.6 | 0.9 | 1.0 | 1.1 | SDH42     | complemer succinate dehydrogen     | orf19.4022 | 3365  | CaSDH42   | C-compound and carbohydrate metabolism ENERGY SUBCELLULAR LOCALISATION                         |
| CA4789 | 0.8 | 0.8 | 0.9 | 0.9 | IPF3366   | complemer Mitochondrial ribosom    | orf19.4023 | 3366  | IPF3366   | PROTEIN I structural molecule activity                                                         |
| CA4790 | 1.3 | 1.0 |     | 1.3 | IPF3367   | 14750556..Riboflavin synthase (b)  | orf19.4024 | 3367  | IPF3367   | Metabolism transferase activity                                                                |
| CA4791 | 0.6 | 0.7 | 0.8 | 0.9 | IPF3370   | 14751414..similar to Saccharomy    | orf19.4025 | 3370  | IPF3370   | PROTEIN Ipeptidase activity                                                                    |
| CA4792 | 1.1 | 0.7 | 0.9 | 1.2 | HIS1      | complemer ATP phosphoribosyltra    | orf19.4026 | 3372  | CaHIS1    | Amino acid transferase activity                                                                |
| CA4793 | 0.9 | 1.0 | 1.0 | 0.9 | IPF3375   | complemer similar to Saccharomy    | orf19.4028 | 3375  | IPF3375   | PROTEIN Itransferase activity                                                                  |
| CA4794 | 1.0 |     | 1.0 | 1.1 | SQT1      | 14754614..suppresses dominant-t    | orf19.4029 | 3377  | CaSQT1    | PROTEIN Imolecular_function unknown                                                            |
| CA4795 | 1.3 | 1.0 | 0.9 | 0.8 | IPF3378   | 14756058..similar to Saccharomy    | orf19.4030 | 3378  | IPF3378   | CELL CYC nucleotidyltransferase activity                                                       |
| CA4796 | 1.0 | 1.0 | 1.1 | 1.0 | IPF3380   | complemer unknown function         | orf19.4031 | 3380  | IPF3380   | UNCLASSImolecular_function unknown                                                             |
| CA4797 | 1.3 | 1.0 | 1.0 | 0.8 | PRP22     | complemer RNA-dependent ATPa       | orf19.4033 | 8801  | CaPRP22   | TRANSCR RNA binding,helicase activity                                                          |
| CA4798 | 1.6 | 1.1 | 0.9 | 1.0 | RPN5.3F   | 14763195..subunit of the regulator | orf19.4032 | 8798  | CaRPN5.3I | PROTEIN Ipeptidase activity                                                                    |
| CA4799 | 0.7 | 0.7 | 0.9 | 0.8 | RPN5.5F   | 14763967..subunit of the regulator | orf19.4034 | 8797  | CaRPN5.5I | PROTEIN FATE [folding modification destination] ""SUBCELLULAR LOCALISATION                     |
| CA4800 | 0.6 | 0.6 | 1.3 | 1.3 | IPF8796   | complemer putative GPI-anchore     | orf19.4035 | 8796  | IPF8796   | SUBCELLLmolecular_function unknown                                                             |
| CA4801 | 1.3 | 1.0 | 0.9 | 0.9 | APM1      | 14766973..AP-1 complex subunit,    | orf19.4036 | 8795  | CaAPM1    | PROTEIN Iprotein binding                                                                       |
| CA4802 | 1.1 |     |     | 0.9 | ILV3      | complemer dihydroxyacid dehydra    | orf19.4040 | 8790  | CaILV3    | Amino acid lyase activity                                                                      |
| CA4803 | 1.2 | 1.1 | 1.2 | 0.8 | PEX4      | 14770965..E2 ubiquitin-conjugatin  | orf19.4041 | 7214  | CaPEX4    | PROTEIN FATE [folding modification destination] ""SUBCELLULAR LOCALISATION                     |
| CA4804 | 0.7 | 0.6 | 1.0 | 1.0 | ARO8      | complemer aromatic amino acid a    | orf19.2098 | 1147  | CaARO8    | Amino acid transferase activity                                                                |
| CA4805 | 0.7 | 1.0 | 1.1 | 1.0 | RAD5      | 14775461..DNA helicase (by hom     | orf19.2097 | 1153  | CaRAD5    | CELL CYC hydrolase activity                                                                    |
| CA4806 | 1.1 | 1.9 | 1.4 | 1.2 | IPF1155   | complemer Putative dipeptidase (t  | orf19.2095 | 1155  | IPF1155   | UNCLASSImolecular_function unknown                                                             |
| CA4807 | 1.1 | 1.0 | 1.0 | 1.0 | PDR6      | 14781435..Pleiotropic drug resista | orf19.2094 | 1158  | CAPDR6    | PROTEIN Iprotein binding                                                                       |
| CA4808 | 0.9 | 0.8 | 0.9 | 1.1 | RFA1      | complemer DNA replication factor   | orf19.2093 | 1160  | CaRFA1    | CELL CYC DNA binding                                                                           |
| CA4809 | 1.2 | 1.1 | 1.0 | 1.1 | IPF1162   | complemer Cystathionine beta-lya   | orf19.2092 | 1162  | IPF1162   | Amino acid lyase activity                                                                      |
| CA4810 | 1.4 | 1.0 | 0.9 | 1.2 | IPF1164   | complemer Subunit NUHM of NAD      | orf19.2091 | 1164  | IPF1164   | No significant S.c. match                                                                      |
| CA4811 | 1.2 | 0.9 | 1.1 | 1.1 | ECM16     | complemer RNA helicase (by hom     | orf19.2090 | 1169  | CaECM16   | CONTROL RNA binding,helicase activity                                                          |
| CA4812 | 0.9 | 1.1 | 1.0 | 1.0 | IPF1171   | 14794532..Putative synaptobrevin   | orf19.2089 | 1171  | IPF1171   | PROTEIN Itransporter activity                                                                  |
| CA4813 | 0.9 | 0.8 | 1.1 | 0.8 | DPB4      | complemer DNA-directed DNA pol     | orf19.2088 | 1174  | CaDPB4    | TRANSCR nucleotidyltransferase activity                                                        |
| CA4814 | 1.2 | 0.9 | 0.9 | 0.8 | SAS2      | 14796407..Zinc finger protein invo | orf19.2087 | 1176  | CaSAS2    | CELL CYC transferase activity                                                                  |
| CA4815 | 1.2 | 1.1 | 1.1 | 1.1 | CDH1      | complemer Substrate-specific acti  | orf19.2084 | 20022 | CaCDH1    | CELL CYC enzyme regulator activity                                                             |
| CA4816 | 1.1 | 1.1 | 1.2 | 0.8 | IPF1183   | 14800278..putative aspartyl prote  | orf19.2082 | 1183  | IPF1183   | PROTEIN FATE [folding modification destination]                                                |
| CA4817 | 0.8 | 1.3 | 0.8 | 1.0 | POM152    | 14801845..Nuclear pore membrar     | orf19.2081 | 1191  | CaPOM15I  | CELLULAFstructural molecule activity                                                           |

|        |     |     |     |     |            |                                     |                   |       |            |                                                                                                        |
|--------|-----|-----|-----|-----|------------|-------------------------------------|-------------------|-------|------------|--------------------------------------------------------------------------------------------------------|
| CA4818 | 0.6 | 1.1 | 1.0 | 1.0 | IPF1193    | complemer unknown function          | orf19.2079        | 1193  | IPF1193    | Metabolism molecular_function unknown                                                                  |
| CA4819 | 1.0 | 1.0 |     | 1.1 | IPF1194    | 14806771..Similar to clathrin coat  | orf19.2078        | 1194  | IPF1194    | CELLULAFprotein binding                                                                                |
| CA4820 | 0.9 | 1.0 |     | 1.0 | IPF1196    | 14809301..unknown function Hyp      | orf19.2077        | 1196  | IPF1196    | Amino acid metabolism Nitrogen and sulphur metabolism TRANSCRIPTION SUBCELLULAR LOCALISATION           |
| CA4821 | 1.0 | 1.1 | 1.0 | 1.1 | IPF1197    | 14812123..unknown function          | orf19.2076        | 1197  | IPF1197    | UNCLASSImolecular_function unknown                                                                     |
| CA4822 | 0.7 | 0.7 | 1.2 | 0.9 | DFG5       | 14814010..Required for filament     | orf19.2075        | 1199  | CaDFG5     | CELL FATImolecular_function unknown                                                                    |
| CA4823 | 1.2 | 1.3 | 1.4 | 1.0 | ERC3       | 14815987..ethionine resistance pr   | orf19.2073        | 1203  | CaERC3     | UNCLASSImolecular_function unknown                                                                     |
| CA4824 | 0.9 | 1.1 |     | 1.1 | HNM2       | 14819106..Choline permease (by      | orf19.2072        | 1204  | CaHNM2     | CELLULAFtransporter activity                                                                           |
| CA4825 | 0.9 | 0.9 | 1.0 | 0.9 | IPF1205    | 14821039..unknown function          | orf19.2071        | 1205  | IPF1205    | No significant S.c. match                                                                              |
| CA4826 | 1.3 | 1.1 | 1.0 | 0.9 | IPF1206    | 14822042..unknown function          | orf19.2070        | 1206  | IPF1206    | UNCLASSImolecular_function unknown                                                                     |
| CA4827 | 1.1 | 0.8 | 0.8 | 1.0 | SMF2       | complemer Manganese transporte      | orf19.2069        | 1207  | CaSMF2     | REGULATItransporter activity                                                                           |
| CA4828 | 1.1 | 0.9 | 1.0 | 1.2 | IPF1209    | 14826300..unknown function          | orf19.2068        | 1209  | IPF1209    | UNCLASSIFIED PROTEINS                                                                                  |
| CA4829 | 0.9 | 1.0 | 0.7 | 1.1 | IPF1210    | complemer similar to Saccharomy     | orf19.2067        | 1210  | IPF1210    | Nitrogen ar molecular_function unknown                                                                 |
| CA4830 | 0.5 | 0.7 | 0.8 | 1.1 | ATP8.EXO   | complemer F1F0-ATPase complex,      | Atp8 subuni       | 1211  | CaATP8.ex  | ENERGY ttransporter activity                                                                           |
| CA4831 | 1.1 | 1.2 | 1.3 | 1.1 | IPF1212    | complemer unknown function          | orf19.2066        | 1212  | IPF1212    | UNCLASSItransferase activity                                                                           |
| CA4832 | 0.8 | 1.0 | 1.2 | 1.0 | DAL2       | complemer Allantoinase              | orf19.2065        | 1213  | CaDAL2     | Nitrogen ar hydrolase activity                                                                         |
| CA4833 | 1.2 | 1.1 | 0.9 | 0.8 | IPF1216    | 14832576..unknown function          | orf19.2064        | 1216  | IPF1216    | CELL FATE UNCLASSIFIED PROTEINS                                                                        |
| CA4834 | 0.8 | 0.9 | 0.9 | 1.1 | IPF1217    | 14836185..unknown function          | orf19.2063        | 1217  | IPF1217    | CELL FATE UNCLASSIFIED PROTEINS                                                                        |
| CA4835 | 0.6 | 0.7 | 0.8 | 0.8 | IPF1218    | complemer Similar to superoxide     | orf19.2062        | 1218  | IPF1218    | CELL RESCUE DEFENSE AND VIRULENCE ""SUBCELLULAR LOCALISATION                                           |
| CA4836 | 0.1 | 0.1 | 0.1 | 0.7 | IPF1222    | complemer Similar to superoxide     | orf19.2060        | 1222  | IPF1222    | CELL RESCUE DEFENSE AND VIRULENCE ""SUBCELLULAR LOCALISATION                                           |
| CA4837 | 1.0 | 0.7 | 0.6 | 1.2 | IPF1228    | 14846438..unknown function          | orf19.2059        | 1228  | IPF1228    | No significant S.c. match                                                                              |
| CA4838 | 0.9 | 1.3 | 1.1 | 1.0 | YTA12      | 14848221..Protease of the SEC1      | orf19.2057        | 1231  | CaYTA12    | ENERGY " peptidase activity                                                                            |
| CA4839 | 1.0 | 1.0 | 1.0 | 1.1 | NPL6       | 14850998..Nuclear protein localiz   | orf19.2055        | 1234  | CaNPL6     | PROTEIN Imolecular_function unknown                                                                    |
| CA4840 | 0.9 | 0.9 | 0.8 | 1.0 | IPF1235    | complemer unknown function          | orf19.2054        | 1235  | IPF1235    | PROTEIN FATE [folding modification destination] ""SUBCELLULAR LOCALISATION                             |
| CA4841 | 1.0 | 1.0 | 1.2 | 0.9 | IPF10355   | complemer unknown function          | orf19.3809        | 10355 | IPF10355   | Amino acid transcription regulator activity                                                            |
| CA4842 | 0.9 | 0.9 | 0.9 | 1.0 | MTD1       | complemer methylenetetrahydrofo     | orf19.3810        | 6938  | CaMTD1     | Nucleotide oxidoreductase activity                                                                     |
| CA4843 | 1.3 | 0.9 | 1.2 | 0.8 | GYP1       | complemer GTPase activating prot    | orf19.3811        | 6940  | CaGYP1     | CELLULAFenzyme regulator activity                                                                      |
| CA4844 | 0.7 | 0.7 | 0.8 | 1.0 | PDR13      | complemer Drug resistance           | orf19.3812        | 6943  | CaPDR13    | CELL RES chaperone activity                                                                            |
| CA4845 | 0.8 | 0.9 | 0.9 | 0.9 | IPF6945.5f | 14865030..unknown function, 5-pr    | orf19.3813        | 6945  | IPF6945.5f | No significant S.c. match                                                                              |
| CA4846 |     | 0.9 | 0.7 | 0.9 | IPF6945.3f | 14865835..unknown function, 3-pr    | orf19.3814        | 6946  | IPF6945.3f | No significant S.c. match                                                                              |
| CA4847 | 0.9 | 1.1 | 0.8 | 1.0 | IPF6951    | 14867398..similar to Saccharomy     | orf19.3815        | 6951  | IPF6951    | PROTEIN Ipeptidase activity                                                                            |
| CA4848 | 0.6 | 1.0 | 1.0 | 0.8 | RTS2       | complemer Unknown function          | orf19.3817        | 6953  | CaRTS2     | CELL CYC molecular_function unknown                                                                    |
| CA4849 | 0.9 | 0.9 | 1.0 | 1.0 | IPF6954    | 14871578..unknown function          | orf19.3818        | 6954  | IPF6954    | No significant S.c. match                                                                              |
| CA4850 | 1.0 | 1.2 | 1.2 | 0.9 | CIRT2      | 14873961..Transposase               | orf19.3820        | 3257  | CaCirt2    | CLASSIFICATION NOT YET CLEAR-CUT                                                                       |
| CA4851 | 0.8 | 0.8 | 1.2 | 1.1 | IPF5818    | 14881168..unknown function          | orf19.3821        | 5818  | IPF5818    | No significant S.c. match                                                                              |
| CA4852 | 0.5 | 0.3 | 0.6 | 0.8 | SCS7       | complemer Required for hydroxyla    | orf19.3822        | 5819  | CaSCS7     | Lipid fatty-oxidoreductase activity                                                                    |
| CA4853 |     | 0.8 | 0.9 | 1.0 | IPF5823    | complemer similar to Saccharomy     | orf19.3823        | 5823  | IPF5823    | CELL CYC protein binding                                                                               |
| CA4854 | 0.6 | 0.9 | 0.8 | 1.1 | RCE1       | complemer CAAX PRENYL PROT          | orf19.3825        | 5825  | CaRCE1     | PROTEIN Ipeptidase activity                                                                            |
| CA4855 | 0.6 | 1.2 | 1.0 | 0.9 | IPF5830    | 14894227..unknown function          | orf19.3826        | 5830  | IPF5830    | UNCLASSIFIED PROTEINS                                                                                  |
| CA4856 | 0.7 | 0.9 | 0.9 | 1.0 | IPF15950   | 14896097..unknown function          | orf19.3827        | 15950 | IPF15950   | UNCLASSImolecular_function unknown                                                                     |
| CA4857 | 0.4 | 0.3 | 0.2 | 0.4 | PHR1       | 14899415..GPI-anchored pH resp      | orf19.3829        | 15932 | CaPHR1     | Lipid fatty-acid and isoprenoid metabolism ""CONTROL OF CELLULAR ORGANIZATION SUBCELLULAR LOCALISATION |
| CA4858 | 1.0 | 0.8 | 1.0 | 0.8 | IPF15927.3 | complemer similar to Saccharomy     | orf19.3831        | 15929 | IPF15927.3 | UNCLASSIRNA binding                                                                                    |
| CA4859 | 0.7 | 1.2 | 1.0 | 1.1 | IPF15927.5 | complemer similar to Saccharomy     | orf19.3833        | 15927 | IPF15927.5 | TRANSCR transcription regulator activity                                                               |
| CA4860 | 1.4 | 0.9 |     | 1.0 | IPF19804   | complemer unknown Function          | orf19.3835        | 19804 | IPF19804   | TRANSCRIPTION SUBCELLULAR LOCALISATION                                                                 |
| CA4861 | 0.8 | 1.0 | 0.8 | 1.1 | IPF4094    | 14906755..unknown function          | orf19.3836        | 4094  | IPF4094    | UNCLASSImolecular_function unknown                                                                     |
| CA4862 | 0.2 | 0.5 | 0.7 | 0.7 | EFB1       | 14908222..translation elongation f  | orf19.3838        | 4091  | CaEFB1     | PROTEIN ttranslation regulator activity                                                                |
| CA4863 | 0.7 | 1.1 | 1.0 | 1.1 | IPF4089    | complemer secretory aspartyl prot   | orf19.3839        | 4089  | IPF4089    | PROTEIN FATE [folding modification destination] ""SUBCELLULAR LOCALISATION                             |
| CA4864 | 1.1 | 0.9 | 0.9 | 1.0 | IPF4087    | 14912663..similar to Saccharomy     | orf19.3840        | 4087  | IPF4087    | TRANSCR protein kinase activity                                                                        |
| CA4865 | 1.4 | 1.1 | 1.4 | 1.0 | IPF4085    | 14917806..similar to Saccharomy     | orf19.3841        | 4085  | IPF4085    | PROTEIN Iprotein kinase activity                                                                       |
| CA4866 | 1.0 | 0.9 | 1.1 | 0.9 | IPF4083    | complemer similar to Saccharomy     | orf19.3843        | 4083  | IPF4083    | PROTEIN Itransporter activity                                                                          |
| CA4867 | 0.8 | 1.0 | 0.9 | 0.9 | IPF4080    | complemer similar to Saccharomy     | orf19.3844        | 4080  | IPF4080    | PROTEIN tstructural molecule activity                                                                  |
| CA4868 | 0.8 | 0.8 | 0.9 | 1.1 | IPF4078    | complemer Unknown Function          | orf19.3845        | 4078  | IPF4078    | No significant S.c. match                                                                              |
| CA4869 | 0.8 | 0.9 | 1.1 | 0.9 | LYS4       | 14925418..homoaconitate hydrate     | orf19.3846        | 4077  | CaLYS4     | Amino acid lyase activity                                                                              |
| CA4870 | 2.2 | 0.8 | 0.8 | 1.3 | IPF19568   | 14935736..unknown function          | orf19.6556        | 19568 | IPF19568   | No significant S.c. match                                                                              |
| CA4871 | 1.1 | 0.9 | 1.0 | 1.0 | IPF1680    | complemer probable amidase          | orf19.6557        | 1680  | IPF1680    | Nitrogen ar hydrolase activity                                                                         |
| CA4872 | 1.1 | 1.1 | 0.9 | 1.0 | SEC231     | 14941589..Component of COPII c      | orf19.6558        | 1677  | CaSEC231   | CELLULAR TRANSPORT AND TRANSPORT MECHANISMS SUBCELLULAR LOCALISATION                                   |
| CA4873 | 0.6 | 0.8 | 0.8 | 1.0 | IPF1674.3  | complemer putative transcription    | initiation factor | 1675  | IPF1674.3  | No significant S.c. match                                                                              |
| CA4874 | 1.2 | 1.0 | 0.9 | 1.1 | IPF1674    | complemer putative transcription ir | orf19.6559        | 1674  | IPF1674    | UNCLASSImolecular_function unknown                                                                     |
| CA4875 | 0.2 | 0.4 |     | 1.3 | LAT1       | complemer Dihydroliipoamide S-ac    | orf19.6561        | 1673  | CaLAT1     | C-compour transferase activity                                                                         |
| CA4876 | 0.9 | 1.0 | 1.0 | 1.0 | RNH35      | complemer RNase H (by homology)     | orf19.6562        | 1669  | CaRNH35    | Nucleotide RNA binding                                                                                 |
| CA4877 | 1.2 | 1.1 | 0.9 | 1.1 | IPF1667    | 14950419..unknown function          | orf19.6563        | 1667  | IPF1667    | UNCLASSImolecular_function unknown                                                                     |
| CA4878 | 1.0 | 0.9 | 1.1 | 1.1 | OXA1       | complemer Cytochrome oxidase b      | orf19.6565        | 1663  | CaOXA1     | ENERGY * transporter activity                                                                          |
| CA4879 | 0.9 | 1.0 | 0.9 | 0.9 | IPF1660    | 14954636..unknown function          | orf19.6566        | 1660  | IPF1660    | UNCLASSIFIED PROTEINS                                                                                  |
| CA4880 | 1.1 | 0.8 | 0.9 | 1.1 | RHC18      | complemer Recombination repair      | orf19.6568        | 1656  | CaRHC18    | CELL CYC molecular_function unknown                                                                    |
| CA4881 | 1.0 | 1.0 | 1.2 | 1.1 | IPF1652    | 14960328..putative purine nucleos   | orf19.6569        | 1652  | IPF1652    | No significant S.c. match                                                                              |
| CA4882 | 1.7 | 1.0 |     | 0.9 | IPF1651    | 14962314..purine nucleoside pern    | orf19.6570        | 1651  | IPF1651    | No significant S.c. match                                                                              |
| CA4883 |     | 1.6 | 0.9 | 1.1 | IPF1649    | complemer similar to Saccharomy     | orf19.6573        | 1649  | IPF1649    | CELL CYC signal transducer activity                                                                    |
| CA4884 | 1.3 | 1.1 |     | 1.2 | ALK6       | complemer n-alkane inducible cyt    | orf19.6574        | 1640  | CaALK6     | CELL RESCUE DEFENSE AND VIRULENCE ""CELL FATE CONTROL OF CELLULAR ORGANIZATION                         |
| CA4885 | 0.6 | 0.9 | 0.8 | 1.0 | IPF1636    | complemer similar to Saccharomy     | orf19.6577        | 1636  | IPF1636    | CELL RES transporter activity                                                                          |
| CA4886 | 2.2 | 1.7 | 2.1 | 1.0 | IPF1634    | complemer unknown function          | orf19.6578        | 1634  | IPF1634    | Phosphate metabolism CELLULAR TRANSPORT AND TRANSPORT MECHANISMS REGULATION OF/INTERACTION WITH        |
| CA4887 | 0.8 | 0.7 | 1.0 | 0.9 | IPF1632    | complemer unknown function          | orf19.6579        | 1632  | IPF1632    | No significant S.c. match                                                                              |
| CA4888 | 1.0 | 0.9 | 1.0 | 1.2 | IPF1631    | complemer unknown function          | orf19.6580        | 1631  | IPF1631    | No significant S.c. match                                                                              |

|        |     |     |     |     |           |                                                 |             |       |           |                                             |                                                                                          |
|--------|-----|-----|-----|-----|-----------|-------------------------------------------------|-------------|-------|-----------|---------------------------------------------|------------------------------------------------------------------------------------------|
| CA4889 | 0.8 | 1.0 | 1.1 | 0.8 | IPF1629   | complemer unknown function                      | orf19.6581  | 1629  | IPF1629   | UNCLASSI                                    | molecular_function unknown                                                               |
| CA4890 | 1.2 | 0.8 | 0.9 | 1.1 | PRE10     | 14990263..20S proteasome subur                  | orf19.6582  | 1628  | CaPRE10   | PROTEIN I                                   | peptidase activity                                                                       |
| CA4891 | 0.9 | 0.9 | 1.0 | 0.9 | IPF1627   | 14991363..unknown function                      | orf19.6583  | 1627  | IPF1627   | CELLULAR TRANSPORT AND TRANSPORT MECHANISMS | SUBCELLULAR LOCALISATION                                                                 |
| CA4892 | 1.6 | 1.0 | 1.0 | 0.9 | PRT1      | 14994841.. Translation initiation fa            | orf19.6584  | 1623  | CaPRT1    | CELL                                        | CYC translation regulator activity                                                       |
| CA4893 | 0.8 | 0.9 | 1.0 | 0.9 | IPF1621   | complemer unknown function                      | orf19.6585  | 1621  | IPF1621   | UNCLASSI                                    | molecular_function unknown                                                               |
| CA4894 | 2.6 | 1.3 | 1.7 | 1.1 | IPF1617   | 15003438..unknown function                      | orf19.6586  | 1617  | IPF1617   | No significant S.c. match                   |                                                                                          |
| CA4895 | 0.8 | 1.1 | 0.9 | 1.0 | IPF18161  | complemer unknown function                      | orf19.6587  | 18161 | IPF18161  | UNCLASSI                                    | molecular_function unknown                                                               |
| CA4896 | 1.2 | 1.0 | 1.1 | 0.8 | IPF18160  | 15009072..unknown function                      | orf19.6588  | 18160 | IPF18160  | PROTEIN I                                   | molecular_function unknown                                                               |
| CA4897 | 0.2 | 0.1 | 0.3 | 0.4 | TUB2.3    | 15014118..Beta-tubulin, 3-prime e               | orf19.6034  | 1463  | CaTUB2.3  | CELL                                        | CYC structural molecule activity                                                         |
| CA4898 | 0.7 | 0.6 | 0.9 | 0.9 | IPF1461   | complemer putative NADH dehydr                  | orf19.6035  | 1461  | IPF1461   | No significant S.c. match                   |                                                                                          |
| CA4899 | 1.1 | 0.8 | 1.1 | 1.0 | IPF1460   | complemer unknown function                      | orf19.6036  | 1460  | IPF1460   | TRANSCR                                     | enzyme regulator activity                                                                |
| CA4900 | 1.3 | 0.7 | 1.1 | 0.8 | IFP2      | complemer unknown function                      | orf19.6037  | 1459  | CaIFP2    | No significant S.c. match                   |                                                                                          |
| CA4901 | 0.9 | 0.8 |     | 1.1 | IPF1457   | 15023409..putative transcription a              | orf19.6038  | 1457  | IPF1457   | Nitrogen and sulphur metabolism             | TRANSCRIPTION SUBCELLULAR LOCALISATION                                                   |
| CA4902 | 0.8 | 1.0 | 0.9 | 0.9 | SED5      | 15025486..Syntaxin (by homology                 | orf19.6039  | 1455  | CaSED5    | CELLULAF                                    | transporter activity                                                                     |
| CA4903 | 1.3 | 1.0 |     | 1.2 | SNF7      | 15027036..Class E Vps protein (b                | orf19.6040  | 1454  | CaSNF7    | C-compou                                    | molecular_function unknown                                                               |
| CA4904 | 0.8 | 1.3 | 1.0 | 1.0 | RPO41     | 15028260..Mitochondrial DNA-dir                 | orf19.6041  | 1453  | CaRPO41   | CELL                                        | CYC nucleotidyltransferase activity                                                      |
| CA4905 | 1.3 | 0.9 |     | 1.3 | DLD1      | complemer D-lactate ferricytochr                | orf19.6043  | 1451  | CaDLD1    | C-compound and carbohydrate metabolism      | ENERGY SUBCELLULAR LOCALISATION                                                          |
| CA4906 | 1.3 | 1.1 | 0.9 | 1.1 | MOB2      | complemer Required for maintenai                | orf19.6044  | 1449  | CaMOB2    | No signific                                 | structural molecule activity                                                             |
| CA4907 | 1.0 | 0.8 | 0.9 | 1.0 | PSD1      | complemer Phosphatidylserine de                 | orf19.6045  | 1448  | CaPSD1    | Lipid fatty- $\alpha$                       | lyase activity                                                                           |
| CA4908 | 1.2 | 1.0 |     | 1.1 | IPF1445   | complemer similar to Saccharomy                 | orf19.6046  | 1445  | IPF1445   | CELL                                        | CYC protein binding                                                                      |
| CA4909 | 0.7 | 0.8 | 0.7 | 0.8 | TUF1      | complemer Translation elongation                | orf19.6047  | 1439  | CaTUF1    | PROTEIN I                                   | translation regulator activity                                                           |
| CA4910 | 1.0 | 1.1 | 1.1 | 0.8 | IPF1437   | complemer unknown function                      | orf19.6048  | 1437  | IPF1437   | C-compound and carbohydrate metabolism      | PROTEIN FATE [folding modification destination] SUBCELLULAR LOCALISATI                   |
| CA4911 | 0.9 | 0.9 | 1.0 | 1.1 | IPF1435   | 15045593..unknown function                      | orf19.6049  | 1435  | IPF1435   | CELL                                        | CYC enzyme regulator activity                                                            |
| CA4912 | 0.9 | 1.1 | 0.9 | 1.1 | CNS1      | complemer Cyclophilin Seven Sup                 | orf19.6052  | 1432  | CaCNS1    | UNCLASSI                                    | chaperone activity                                                                       |
| CA4913 | 1.3 | 1.1 | 1.0 | 0.8 | CIS2      | complemer Gamma-glutamyltrans                   | orf19.6053  | 1431  | CaCIS2    | Amino acid transferase                      | activity                                                                                 |
| CA4914 | 1.2 | 1.0 | 0.7 | 1.0 | IPF1428   | 15052039.. Similar to ubiquitin                 | orf19.6054  | 1428  | IPF1428   | PROTEIN FATE                                | [folding modification destination]                                                       |
| CA4915 | 1.4 | 1.0 | 1.0 | 1.0 | IPF1427   | 15054729.. Similar to ubiquitin                 | orf19.6055  | 1427  | IPF1427   | PROTEIN FATE                                | [folding modification destination]                                                       |
| CA4916 | 0.9 | 0.9 | 1.0 | 0.9 | IPF1425   | complemer Hypothetical phosphog                 | orf19.6056  | 1425  | IPF1425   | C-compou                                    | molecular_function unknown                                                               |
| CA4917 | 1.0 | 0.9 | 1.0 | 1.0 | ECM31     | complemer Involved in cell wall bic             | orf19.6057  | 1424  | CaECM31   | Metabolism                                  | transferase activity                                                                     |
| CA4918 | 0.5 | 0.5 | 0.9 | 1.1 | GLO1      | 15059618..Glyoxalase I (by homo                 | orf19.6058  | 1422  | CaGLO1    | Amino acid                                  | lyase activity                                                                           |
| CA4919 | 0.2 | 1.0 |     | 1.0 | TTR1      | 15060920.. Glutaredoxin (by homo                | orf19.6059  | 1421  | CaTTR1    | Nucleotide                                  | transferase activity, oxidoreductase activity                                            |
| CA4920 | 1.2 | 1.0 | 0.9 | 0.9 | GCN20     | 15061459.. Positive effector of Gcr             | orf19.6060  | 1420  | CaGCN20   | PROTEIN I                                   | molecular_function unknown                                                               |
| CA4921 | 1.2 | 1.0 | 1.1 | 0.8 | IPF1416   | 15063906..unknown function                      | orf19.6061  | 1416  | IPF1416   | UNCLASSI                                    | molecular_function unknown                                                               |
| CA4922 | 0.4 | 1.0 | 0.8 | 1.0 | IPF1415   | complemer unknown function                      | orf19.6062  | 1415  | IPF1415   | UNCLASSI                                    | molecular_function unknown                                                               |
| CA4923 | 0.6 | 0.8 | 0.9 | 1.0 | IPF1413.3 | 15066196..unknown function, 3-prime end         |             | 1413  | IPF1413.3 | CLASSIFIC                                   | molecular_function unknown                                                               |
| CA4924 | 0.6 | 1.0 | 0.9 | 1.0 | UBP6.3    | complemer Ubiquitin-specific prote              | orf19.6063  | 1412  | CaUBP6.3  | PROTEIN I                                   | peptidase activity                                                                       |
| CA4925 | 1.5 | 1.1 | 1.1 | 0.8 | IPF1408   | complemer unknown function                      | orf19.6064  | 1408  | IPF1408   | UNCLASSI                                    | molecular_function unknown                                                               |
| CA4926 | 1.3 | 1.1 | 1.1 | 0.8 | IPF1404   | complemer unknown function                      | orf19.6065  | 1404  | IPF1404   | C-compound and carbohydrate metabolism      | ENERGY TRANSCRIPTION CELL FATE SUBCELLULAR LOCALISATION                                  |
| CA4927 | 1.4 | 1.5 | 1.8 | 1.0 | IPF1401   | 15072963..similarity to aldehyde c              | orf19.6066  | 1401  | IPF1401   | CLASSIFIC                                   | molecular_function unknown                                                               |
| CA4928 | 1.7 | 1.0 | 1.2 | 0.9 | IPF1399   | complemer unknown function                      | orf19.6068  | 1399  | IPF1399   | UNCLASSI                                    | molecular_function unknown                                                               |
| CA4929 | 4.2 | 4.4 | 2.0 | 1.8 | ENA22     | complemer P-type ATPase involve                 | orf19.6070  | 1398  | CaENA22   | REGULATI                                    | transporter activity                                                                     |
| CA4930 | 1.1 | 1.2 | 1.1 | 1.1 | IPF8381   | 15082213..similar to Saccharomy                 | orf19.6071  | 8381  | IPF8381   | CELL                                        | CYC transferase activity                                                                 |
| CA4931 | 1.1 | 0.9 |     | 1.2 | IPF8378   | complemer unknown function                      | orf19.6072  | 8378  | IPF8378   | No significant S.c. match                   |                                                                                          |
| CA4932 | 0.9 | 1.2 | 1.2 | 1.0 | IPF8374   | 15087606..unknown function                      | orf19.6073  | 8374  | IPF8374   | Metabolism                                  | oxidoreductase activity                                                                  |
| CA4933 | 1.1 | 0.9 | 0.7 | 1.2 | IPF8372   | complemer unknown function                      | orf19.6074  | 8372  | IPF8372   | UNCLASSI                                    | molecular_function unknown                                                               |
| CA4934 | 0.7 | 1.0 | 1.0 | 0.9 | CDC36     | 15089444..transcription factor (by              | orf19.6075  | 8371  | CaCDC36   | CELL                                        | CYC RNA binding                                                                          |
| CA4935 | 1.0 | 0.9 | 0.8 | 1.0 | VPS29     | complemer vacuolar protein sortin               | orf19.6076  | 8370  | CaVPS29   | PROTEIN I                                   | molecular_function unknown                                                               |
| CA4936 | 1.1 | 1.1 |     | 1.2 | IPF8369   | complemer unknown function                      | orf19.13498 | 8369  | IPF8369   | UNCLASSI                                    | molecular_function unknown                                                               |
| CA4937 | 1.1 | 0.8 | 0.9 | 0.9 | TFP3      | complemer H <sup>+</sup> -ATPase by homolo      | orf19.6538  | 5167  | CaTFP3    | PROTEIN I                                   | transporter activity                                                                     |
| CA4938 | 0.7 | 1.0 | 0.9 | 0.9 | IPF5166   | 15094986..unknown function                      | orf19.6537  | 5166  | IPF5166   | UNCLASSI                                    | molecular_function unknown                                                               |
| CA4939 | 1.5 | 1.0 | 0.9 | 0.9 | IQG1      | 15096398..RAS GTPase-activat                    | orf19.6536  | 5165  | CaIQG1    | CELL                                        | CYC protein binding                                                                      |
| CA4940 | 0.6 | 0.8 | 0.9 | 0.9 | CRN1.3F   | complemer actin-binding protein, 3              | orf19.6535  | 5163  | CaCRN1.3  | No significant S.c. match                   |                                                                                          |
| CA4941 | 0.9 | 1.0 | 0.9 | 0.9 | CRN1.53F  | complemer actin-binding protein, 5-prime end (I |             | 5160  | CaCRN1.5  | SUBCELL                                     | protein binding                                                                          |
| CA4943 | 0.5 | 0.9 | 0.8 | 0.9 | IPF5158   | complemer unknown function                      | orf19.6534  | 5158  | IPF5158   | No significant S.c. match                   |                                                                                          |
| CA4944 | 0.7 | 0.9 | 1.0 | 0.9 | MSK1      | 15104388..lysyl-tRNA synthetase                 | orf19.6533  | 5156  | CaMSK1    | PROTEIN I                                   | ligase activity                                                                          |
| CA4945 | 0.5 | 0.9 | 0.9 | 0.9 | FLX1      | complemer MITOCHONDRIAL FA                      | orf19.6532  | 5154  | CaFLX1    | Metabolism                                  | transporter activity                                                                     |
| CA4946 | 0.5 | 1.1 | 0.9 | 1.0 | TOM71     | complemer Translocase of the outer mitochondr   |             | 5151  | CaTOM71   | PROTEIN I                                   | transporter activity                                                                     |
| CA4947 | 0.4 | 1.1 | 0.8 | 1.1 | NUC2      | 15108686..NADH-UBIQUINONE (orf                  | 19.6531     | 5150  | CaNUC2    | No significant S.c. match                   |                                                                                          |
| CA4948 | 0.8 | 0.9 | 0.9 | 1.0 | IPF5149   | complemer unknown function                      | orf19.6530  | 5149  | IPF5149   | PROTEIN FATE                                | [folding modification destination] CELLULAR TRANSPORT AND TRANSPORT MECHANISMS SUBCELLUL |
| CA4949 | 1.3 | 0.9 | 1.6 | 1.1 | CDC34     | 15113037..Ubiquitin-conjugating e               | orf19.6529  | 5145  | CaCDC34   | Amino acid                                  | ligase activity                                                                          |
| CA4950 | 1.3 | 1.0 | 0.9 | 0.8 | IPF5143   | complemer Unknown function                      | orf19.6528  | 5143  | IPF5143   | No significant S.c. match                   |                                                                                          |
| CA4951 | 0.9 | 0.9 | 0.7 | 1.1 | IPF13607  | complemer unknown function                      | orf19.6527  | 13607 | IPF13607  | UNCLASSI                                    | molecular_function unknown                                                               |
| CA4952 | 0.7 | 0.8 | 1.1 | 1.0 | IPF13609  | 15120425..unknown function                      | orf19.6526  | 13609 | IPF13609  | UNCLASSI                                    | molecular_function unknown                                                               |
| CA4953 | 1.4 | 1.2 | 0.9 | 0.9 | IPF4567.3 | 15121764..unknown function, 3-pr                | orf19.6525  | 4567  | IPF4567.3 | No significant S.c. match                   |                                                                                          |
| CA4954 | 0.6 | 1.2 | 1.0 | 1.6 | TOM40     | complemer mitochondrial import re               | orf19.6524  | 4568  | CaTOM40   | PROTEIN I                                   | transporter activity                                                                     |
| CA4955 | 1.2 | 1.2 | 0.9 | 1.2 | IPF4580   | complemer putative allantoinate per             | orf19.6522  | 4580  | IPF4580   | TRANSPORT                                   | FACILITATION                                                                             |
| CA4956 | 1.4 | 1.0 | 1.0 | 0.9 | IPF4583   | complemer putative allantoinate per             | orf19.6520  | 4583  | IPF4583   | TRANSPO                                     | transporter activity                                                                     |
| CA4957 | 1.2 | 1.1 | 0.9 | 1.2 | IPF4588   | complemer putative aldehyde dehy                | orf19.6518  | 4588  | IPF4588   | CLASSIFIC                                   | ATION NOT YET CLEAR-CUT                                                                  |
| CA4958 | 1.5 | 1.1 | 1.1 | 0.8 | RAD14     | 15140020..nucleotide excision rep               | orf19.6517  | 4591  | CaRAD14   | CELL                                        | CYC DNA binding                                                                          |
| CA4959 | 0.4 | 1.7 | 0.6 | 1.0 | HSP90     | 15141513..heat shock protein                    | orf19.6515  | 4596  | CaHSP90   | CELL                                        | RES chaperone activity                                                                   |
| CA4960 | 5.2 | 4.6 | 4.7 | 1.3 | IPF3912   | complemer unknown function                      | orf19.6514  | 3912  | IPF3912   | TRANSCR                                     | transcription regulator activity                                                         |

|        |     |     |     |     |          |                                                 |            |       |           |                                                                                                             |
|--------|-----|-----|-----|-----|----------|-------------------------------------------------|------------|-------|-----------|-------------------------------------------------------------------------------------------------------------|
| CA4961 | 1.0 | 1.1 | 1.0 | 1.2 | IPF3916  | complemer similar to Saccharomy                 | orf19.6512 | 3916  | IPF3916   | CELLULAF protein binding                                                                                    |
| CA4962 | 1.3 | 1.0 | 1.0 | 0.9 | TRL1     | 15160208..tRNA ligase                           | orf19.6511 | 3918  | CaTRL1    | TRANSCR ligase activity                                                                                     |
| CA4963 | 0.8 | 0.9 | 1.0 | 1.2 | IPF3919  | 15162982..unknown function                      | orf19.6510 | 3919  | IPF3919   | CELL RESCUE DEFENSE AND VIRULENCE                                                                           |
| CA4964 | 1.2 | 1.1 | 0.8 | 0.9 | IPF3920  | 15163666..unknown function                      | orf19.6509 | 3920  | IPF3920   | Nucleotide metabolism ""CELL RESCUE DEFENSE AND VIRULENCE ""SUBCELLULAR LOCALISATION                        |
| CA4965 | 1.1 | 1.1 | 1.1 | 0.9 | IPF3921  | complemer unknown function                      | orf19.6508 | 3921  | IPF3921   | CELLULAF transporter activity                                                                               |
| CA4966 | 1.0 | 1.2 | 1.2 | 1.2 | IPF3923  | 15165775..unknown function                      | orf19.6507 | 3923  | IPF3923   | PROTEIN SYNTHESIS ""PROTEIN FATE [folding modification destination] ""SUBCELLULAR LOCALISATION UNCLASSIFIED |
| CA4967 | 1.1 | 1.1 |     | 0.9 | IPF3927  | 15167052..unknown function                      | orf19.6506 | 3927  | IPF3927   | UNCLASSI molecular_function unknown                                                                         |
| CA4968 | 0.9 | 1.0 | 1.4 | 1.1 | IPF3928  | complemer unknown function                      | orf19.6503 | 3928  | IPF3928   | No significant S.c. match                                                                                   |
| CA4969 | 1.3 | 1.1 | 1.1 | 0.9 | IPF3930  | 15170109..unknown function                      | orf19.6502 | 3930  | IPF3930   | CELL CYC molecular_function unknown                                                                         |
| CA4970 | 1.5 | 1.3 | 1.3 | 1.2 | IPF4696  | 15175492..unknown Function                      | orf19.5282 | 4696  | IPF4696   | UNCLASSIFIED PROTEINS                                                                                       |
| CA4971 | 1.0 | 0.7 |     | 0.8 | IPF4697  | 15177526..similar to Saccharomy                 | orf19.5281 | 4697  | IPF4697   | CELL CYC RNA binding                                                                                        |
| CA4972 | 2.1 | 1.2 | 1.3 | 1.1 | MUP1     | 15182420..High affinity methionin               | orf19.5280 | 4701  | CaMUP1    | Amino acid transporter activity                                                                             |
| CA4973 | 0.9 | 0.9 | 1.0 | 1.0 | IPF4703  | 15184424..unknown Function                      | orf19.5279 | 4703  | IPF4703   | UNCLASSI structural molecule activity                                                                       |
| CA4974 | 1.4 | 0.8 |     | 1.1 | IPF4704  | 15185345..unknown Function                      | orf19.5278 | 4704  | IPF4704   | UNCLASSI molecular_function unknown                                                                         |
| CA4975 | 0.8 | 1.1 | 1.1 | 1.0 | IPF4706  | complemer unknown Function                      | orf19.5277 | 4706  | IPF4706   | Nucleotide molecular_function unknown                                                                       |
| CA4976 | 0.9 | 0.9 | 0.7 | 1.1 | IPF4708  | 15188026..unknown Function                      | orf19.5276 | 4708  | IPF4708   | UNCLASSI protein binding                                                                                    |
| CA4977 | 0.9 | 1.0 | 0.9 | 1.1 | IPF4710  | 15189601..unknown Function                      | orf19.5275 | 4710  | IPF4710   | UNCLASSI molecular_function unknown                                                                         |
| CA4978 | 1.3 | 1.0 | 1.1 | 0.8 | IPF2065  | 15193003..unknown function                      | orf19.5274 | 2065  | IPF2065   | UNCLASSI molecular_function unknown                                                                         |
| CA4979 | 0.9 | 1.1 | 0.9 | 1.0 | IPF2062  | complemer unknown function                      | orf19.5271 | 2062  | IPF2062   | Nucleotide metabolism CELL CYCLE AND DNA PROCESSING CELLULAR COMMUNICATION/SIGNAL TRANSDUCTION M            |
| CA4980 | 1.0 | 1.0 | 1.0 | 1.0 | IPF2059  | 15199221..unknown function                      | orf19.5270 | 2059  | IPF2059   | UNCLASSIFIED PROTEINS                                                                                       |
| CA4981 | 1.0 | 0.9 | 1.0 | 0.9 | IPF2057  | complemer unknown function                      | orf19.5269 | 2057  | IPF2057   | No significant S.c. match                                                                                   |
| CA4982 | 0.9 | 1.0 | 1.1 | 1.1 | NUT2     | 15203161..Negative transcription                | orf19.5268 | 2054  | CaNUT2    | TRANSCR transcription regulator activity                                                                    |
| CA4983 | 1.0 | 0.9 | 0.7 | 1.0 | IPF2053  | 15206221..unknown function                      | orf19.5267 | 2053  | IPF2053   | No significant S.c. match                                                                                   |
| CA4984 | 0.7 | 1.0 | 1.1 | 1.0 | IPF2052  | complemer unknown function                      | orf19.5266 | 2052  | IPF2052   | No significant S.c. match                                                                                   |
| CA4985 | 0.4 | 0.5 | 0.4 | 0.7 | IPF2050  | complemer similar to Saccharomy                 | orf19.5265 | 2050  | IPF2050   | CELL CYC motor activity, structural molecule activity                                                       |
| CA4986 | 0.9 | 0.8 | 1.0 | 1.2 | SER33    | 15215166..Phosphoglycerate deh                  | orf19.5263 | 2046  | CaSER33   | Amino acid oxidoreductase activity                                                                          |
| CA4987 | 0.9 | 0.9 | 1.0 | 1.0 | IPF2045  | 15216737..unknown function                      | orf19.5262 | 2045  | IPF2045   | No significant S.c. match                                                                                   |
| CA4988 | 0.8 | 1.3 | 1.1 | 1.1 | RPN2     | 15217609..Proteasome regulatory                 | orf19.5260 | 2043  | CaRPN2    | TRANSCR peptidase activity, signal transducer activity                                                      |
| CA4989 | 1.1 | 0.7 | 1.0 | 0.9 | IPF2041  | complemer unknown function                      | orf19.5259 | 2041  | IPF2041   | No significant S.c. match                                                                                   |
| CA4990 | 1.3 | 0.8 | 1.0 | 0.9 | IPF2039  | complemer unknown function                      | orf19.5258 | 2039  | IPF2039   | No significant S.c. match                                                                                   |
| CA4991 | 0.5 | 1.0 | 1.1 | 1.0 | LCB4     | 15224113..Sphingolipid long chair               | orf19.5257 | 2037  | CaLCB4    | Lipid fatty-acid and isoprenoid metabolism                                                                  |
| CA4992 | 1.0 | 0.9 | 1.0 | 1.0 | IPF2036  | complemer unknown function                      | orf19.5256 | 2036  | IPF2036   | CELLULAR TRANSPORT AND TRANSPORT MECHANISMS SUBCELLULAR LOCALISATION                                        |
| CA4993 | 1.4 | 1.4 | 1.6 | 1.0 | PXA2     | complemer ABC transporter, pero                 | orf19.5255 | 2034  | CaPXA2    | Lipid fatty-ε transporter activity, hydrolase activity                                                      |
| CA4994 | 1.0 | 1.0 | 1.1 | 1.1 | IPF2033  | complemer unknown function                      | orf19.5254 | 2033  | IPF2033   | No significant S.c. match                                                                                   |
| CA4995 | 0.9 | 1.0 | 0.9 | 0.9 | YAK1     | 15230847..Ser/thr protein kinase                | orf19.5253 | 2032  | CaYAK1    | CELL CYCLE AND DNA PROCESSING SUBCELLULAR LOCALISATION                                                      |
| CA4996 | 1.0 | 1.1 | 1.2 | 0.8 | IPF2029  | complemer unknown function                      | orf19.5251 | 2029  | IPF2029   | TRANSCRIPTION ""CELL RESCUE DEFENSE AND VIRULENCE ""SUBCELLULAR LOCALISATION                                |
| CA4997 | 0.6 | 1.1 | 0.9 | 1.1 | IPF2027  | 15235858..unknown function                      | orf19.5250 | 2027  | IPF2027   | No significant S.c. match                                                                                   |
| CA4998 | 1.1 | 0.9 | 1.3 | 1.1 | IPF2026  | complemer unknown function                      | orf19.5249 | 2026  | IPF2026   | No significant S.c. match                                                                                   |
| CA4999 | 0.8 | 1.0 | 0.8 | 0.8 | IPF2024  | 15237770..unknown function                      | orf19.5248 | 2024  | IPF2024   | CELLULAF molecular_function unknown                                                                         |
| CA5000 | 1.0 | 1.1 | 0.9 | 1.0 | IPF2023  | complemer unknown function                      | orf19.5247 | 2023  | IPF2023   | UNCLASSI molecular_function unknown                                                                         |
| CA5001 | 0.5 | 0.7 | 1.0 | 1.1 | IPF2022  | complemer unknown function                      | orf19.5246 | 2022  | IPF2022   | No significant S.c. match                                                                                   |
| CA5002 | 1.0 | 0.9 | 1.1 | 1.0 | IPF2021  | 15241490..unknown function                      | orf19.5245 | 2021  | IPF2021   | PROTEIN FATE [folding modification destination]                                                             |
| CA5003 | 0.6 | 1.0 | 0.9 | 0.8 | MCD4     | 15243972..Sporulation protein (by               | orf19.5244 | 2019  | CaMCD4    | CELL FATf molecular_function unknown                                                                        |
| CA5004 | 0.9 | 1.0 | 1.3 | 0.9 | TRP3     | 15247113..Anthranilate synthase                 | orf19.5243 | 2018  | CaTRP3    | Amino acid lyase activity                                                                                   |
| CA5005 | 0.7 | 1.0 | 0.9 | 0.9 | CDC62    | 15249204..Cell division control protein (by hom |            | 18149 | CaCDC62   | No significant S.c. match                                                                                   |
| CA5006 | 0.9 | 1.4 | 1.0 | 1.0 | IPF12584 | 15251820..unknown function                      | orf19.5241 | 12584 | IPF12584  | UNCLASSI hydrolase activity                                                                                 |
| CA5007 | 1.3 | 0.9 | 1.0 | 1.1 | IPF12579 | complemer putative phospholipase                | orf19.5239 | 12579 | IPF12579  | Lipid fatty-ε molecular_function unknown                                                                    |
| CA5008 | 1.6 | 1.0 | 1.1 | 0.9 | IPF12577 | complemer unknown function                      | orf19.5238 | 12577 | IPF12577  | No significant S.c. match                                                                                   |
| CA5009 | 0.6 | 1.0 | 1.0 | 1.1 | VPH2     | 15259729..H+-ATPase assembly                    | orf19.5237 | 13946 | CaVPH2    | PROTEIN f molecular_function unknown                                                                        |
| CA5010 | 0.8 | 1.0 | 0.7 | 1.0 | IPF13945 | 15260525..Unknown function                      |            | 13945 | IPF13945  | PROTEIN FATE [folding modification destination] ""CONTROL OF CELLULAR ORGANIZATION                          |
| CA5011 | 0.9 | 1.1 | 1.1 | 1.2 | IPF13944 | 15260959..unknown function                      | orf19.5236 | 13944 | IPF13944  | PROTEIN FATE [folding modification destination] ""CONTROL OF CELLULAR ORGANIZATION                          |
| CA5012 | 1.4 | 1.0 | 1.0 | 0.9 | IPF13943 | complemer Unknown function                      | orf19.5235 | 13943 | IPF13943  | No significant S.c. match                                                                                   |
| CA5013 | 1.3 | 1.5 | 1.1 | 1.2 | IPF13941 | complemer Unknown function                      | orf19.5234 | 13941 | IPF13941  | SUBCELLULAR LOCALISATION TRANSPORT FACILITATION                                                             |
| CA5014 | 1.0 | 0.9 | 1.0 | 0.9 | IPF11120 | complemer similar to Saccharomy                 | orf19.6966 | 11120 | IPF11120  | Lipid fatty-ε transferase activity                                                                          |
| CA5015 | 1.4 | 1.0 | 1.1 | 0.7 | IPF11118 | 15275852..unknown function                      | orf19.6967 | 11118 | IPF11118  | CELLULAR TRANSPORT AND TRANSPORT MECHANISMS SUBCELLULAR LOCALISATION                                        |
| CA5016 | 1.1 | 0.9 | 0.8 | 1.1 | IPF7561  | 15282767..unknown function                      | orf19.6968 | 7561  | IPF7561   | No significant S.c. match                                                                                   |
| CA5017 | 0.5 | 0.9 | 1.3 | 0.9 | IPF7559  | complemer unknown function                      | orf19.6970 | 7559  | IPF7559   | UNCLASSIFIED PROTEINS                                                                                       |
| CA5018 | 1.0 | 0.9 | 1.1 | 1.0 | IPF7558  | 15287768..unknown function                      | orf19.6971 | 7558  | IPF7558   | C-compou transferase activity                                                                               |
| CA5019 | 1.3 | 1.1 | 0.9 | 0.9 | IPF7557  | complemer similar to Saccharomy                 | orf19.6972 | 7557  | IPF7557   | C-compound and carbohydrate metabolism SUBCELLULAR LOCALISATION                                             |
| CA5020 | 1.2 | 1.7 | 1.2 | 1.1 | IPF7556  | complemer similar to Saccharomy                 | orf19.6973 | 7556  | IPF7556   | TRANSCRIPTION ""PROTEIN FATE [folding modification destination] ""SUBCELLULAR LOCALISATION                  |
| CA5021 | 1.1 | 0.5 | 0.6 | 0.9 | YST1.EXO | complemer Ribosomal protein, exc                | orf19.6975 | 7549  | CaYST1.ex | PROTEIN f structural molecule activity                                                                      |
| CA5023 | 1.4 | 1.1 |     | 1.0 | IPF7547  | complemer unknown function                      | orf19.6976 | 7547  | IPF7547   | UNCLASSI molecular_function unknown                                                                         |
| CA5024 | 1.9 | 1.0 | 1.2 | 1.0 | IPF3009  | complemer similar to Saccharomy                 | orf19.6977 | 3009  | IPF3009   | Lipid fatty-ε molecular_function unknown                                                                    |
| CA5025 | 3.0 | 1.7 | 2.3 | 1.2 | AMI3     | 15306272..protein required for nor              | orf19.6979 | 3003  | CaAMI3    | UNCLASSI molecular_function unknown                                                                         |
| CA5026 | 0.8 | 1.1 | 1.0 | 1.1 | IPF3001  | 15310230..serine/threonine protei               | orf19.6980 | 3001  | IPF3001   | CELL RESCUE DEFENSE AND VIRULENCE                                                                           |
| CA5027 | 1.0 | 1.1 | 0.9 | 1.0 | IPF2999  | 15312312..unknown function                      | orf19.6981 | 2999  | IPF2999   | UNCLASSI molecular_function unknown                                                                         |
| CA5028 | 1.4 | 1.0 | 0.8 | 0.8 | IPF2998  | complemer unknown function                      | orf19.6982 | 2998  | IPF2998   | UNCLASSI molecular_function unknown                                                                         |
| CA5029 | 1.1 | 1.3 | 1.1 | 1.3 | IPF2997  | complemer unknown function                      | orf19.6983 | 2997  | IPF2997   | C-compound and carbohydrate metabolism TRANSCRIPTION SUBCELLULAR LOCALISATION                               |
| CA5030 | 1.0 | 1.1 | 1.0 | 1.0 | IPF2988  | 15331189..unknown function                      | orf19.6984 | 2988  | IPF2988   | UNCLASSIFIED PROTEINS                                                                                       |
| CA5031 | 0.9 |     | 1.0 | 1.1 | IPF20023 | 15333873..similar to Saccharomy                 | orf19.6985 | 20023 | IPF20023  | TRANSCR DNA binding                                                                                         |
| CA5032 | 0.9 | 1.0 | 1.0 | 1.1 | IPF2982  | 15338446..unknown function                      | orf19.6986 | 2982  | IPF2982   | UNCLASSIFIED PROTEINS                                                                                       |

|        |      |     |      |     |           |                                                |                |                                                                                                         |
|--------|------|-----|------|-----|-----------|------------------------------------------------|----------------|---------------------------------------------------------------------------------------------------------|
| CA5033 | 1.9  | 1.3 | 1.1  | 1.1 | DNM1      | complemer Dynamin-related protei orf19.6987    | 2980 CaDNM1    | SUBCELLL hydrolase activity                                                                             |
| CA5034 | 0.8  | 0.8 | 0.8  | 0.9 | OST1      | 15344570..oligosaccharyltransfer orf19.6988    | 4532 CaOST1    | C-compou transferase activity                                                                           |
| CA5035 | 0.8  | 0.9 | 1.1  | 1.0 | IPF4531   | complemer unknown function orf19.6989          | 4531 IPF4531   | CLASSIFICATION NOT YET CLEAR-CUT                                                                        |
| CA5036 | 1.6  | 1.1 | 1.0  | 0.9 | CYP52     | complemer Peptidyl-prolyl cis-trans orf19.6990 | 4530 CaCYP52   | PROTEIN FATE [folding modification destination] ""SUBCELLULAR LOCALISATION                              |
| CA5037 | 0.6  | 1.2 | 1.2  | 1.1 | PRE3      | 15347635..20S proteasome subur orf19.6991      | 4529 CaPRE3    | PROTEIN Ipeptidase activity                                                                             |
| CA5038 | 0.9  | 1.1 | 1.1  | 1.0 | QDR2      | 15349554..putative antibiotic resis orf19.6992 | 4526 CaQDR2    | CELL RESCUE DEFENSE AND VIRULENCE ""TRANSPORT FACILITATION                                              |
| CA5039 | 20.9 | 7.0 | 47.6 | 3.3 | GAP2      | complement(15351309..15353075 orf19.6993       | 4523 CaGAP2    | Amino acid transporter activity                                                                         |
| CA5040 | 0.9  | 1.2 | 1.1  | 1.1 | BAT22     | complemer branched chain amino orf19.6994      | 4517 CaBAT22   | Amino acid metabolism SUBCELLULAR LOCALISATION                                                          |
| CA5041 | 1.9  | 1.1 | 1.4  | 0.9 | FRP7      | 15357526..member of the FRP far orf19.6995     | 4516 CaFRP7    | C-compound and carbohydrate metabolism                                                                  |
| CA5042 | 1.0  | 1.3 | 1.0  | 1.2 | IPF4514   | 15359151..putative alpha-1,3-mar orf19.6996    | 4514 IPF4514   | C-compound and carbohydrate metabolism ""PROTEIN FATE [folding modification destination] ""             |
| CA5043 | 0.9  |     | 1.0  | 1.2 | FRP4      | 15361837..member of the FRP far orf19.6997     | 4513 CaFRP4    | C-compound and carbohydrate metabolism                                                                  |
| CA5044 |      |     |      |     | GTT2      | 15363476..15364279                             |                |                                                                                                         |
| CA5045 | 1.0  | 0.9 |      | 1.1 | IPF4510   | 15364750..unknown function orf19.6999          | 4510 IPF4510   | CELL RESCUE DEFENSE AND VIRULENCE                                                                       |
| CA5046 | 1.9  | 1.0 | 1.0  | 1.1 | YCK2      | 15368249..casein kinase I (by hor orf19.7001   | 4506 CaYCK2    | CELL CYC protein kinase activity                                                                        |
| CA5047 | 1.2  | 0.9 | 1.0  | 0.9 | IPF4504   | complemer unknown function orf19.7002          | 4504 IPF4504   | No significant S.c. match                                                                               |
| CA5048 | 0.9  | 0.9 | 1.4  | 1.0 | IPF20024  | complemer unknown function orf19.10530         | 20024 IPF20024 | TRANSCR transcription regulator activity                                                                |
| CA5049 | 0.5  | 0.4 | 0.6  | 0.8 | IPF3714   | complemer similar to Saccharomy orf19.3013     | 3714 IPF3714   | C-compou structural molecule activity                                                                   |
| CA5050 | 0.4  | 1.0 | 0.8  | 0.6 | BMH2      | complemer similar to Saccharomy orf19.3014     | 3712 CaBMH2    | CELL CYC protein binding,DNA binding                                                                    |
| CA5051 | 1.5  | 1.3 | 1.2  | 1.2 | IPF3709   | complemer unknown function orf19.3015          | 3709 IPF3709   | UNCLASSI molecular_function unknown                                                                     |
| CA5052 | 1.2  |     | 1.0  | 0.9 | IPF3708   | 15385817..unknown function orf19.3016          | 3708 IPF3708   | No significant S.c. match                                                                               |
| CA5053 | 0.8  | 1.0 | 1.1  | 1.0 | IPF3707   | complemer unknown function orf19.3018          | 3707 IPF3707   | UNCLASSI DNA binding,transcription regulator activity                                                   |
| CA5054 | 1.2  | 1.1 | 1.0  | 1.1 | IPF3704   | 15387676..unknown function orf19.3019          | 3704 IPF3704   | CELL CYC helicase activity                                                                              |
| CA5055 | 1.2  | 1.2 | 1.1  | 1.1 | IPF3701   | 15390160..unknown function orf19.3021          | 3701 IPF3701   | UNCLASSI molecular_function unknown                                                                     |
| CA5056 | 1.0  | 1.2 | 1.1  | 0.9 | IPF3698   | 15391444..similar to Saccharomy orf19.3022     | 3698 IPF3698   | PROTEIN 'structural molecule activity                                                                   |
| CA5057 | 0.8  | 1.3 | 1.2  | 0.8 | IPF3695   | 15392660..similar to Saccharomy orf19.3023     | 3695 IPF3695   | C-compou transcription regulator activity                                                               |
| CA5058 |      |     |      |     | MAS1      | complement(15394649..15396052)                 |                |                                                                                                         |
| CA5059 | 0.9  | 1.1 | 1.0  | 0.9 | IPF3691   | 15396512..unknown function orf19.3027          | 3691 IPF3691   | SUBCELLULAR LOCALISATION                                                                                |
| CA5060 | 1.7  | 1.7 | 1.1  | 1.2 | IPF3690   | complemer unknown function orf19.3029          | 3690 IPF3690   | CLASSIFIC hydrolase activity                                                                            |
| CA5061 | 1.3  | 1.2 | 1.0  | 1.2 | IPF8495   | complemer unknown function orf19.3030          | 8495 IPF8495   | UNCLASSIFIED PROTEINS                                                                                   |
| CA5062 | 0.8  |     | 0.9  | 1.2 | SEC62     | complemer subunit of ER protein-t orf19.3031   | 8494 CaSEC62   | PROTEIN I protein binding                                                                               |
| CA5063 | 1.1  | 0.9 |      | 1.0 | IPF8493   | complemer putative member of no orf19.3034     | 8493 IPF8493   | TRANSPO transporter activity                                                                            |
| CA5064 | 1.5  | 1.5 |      | 1.2 | CHD1      | 15407747..transcriptional regulato orf19.3035  | 8489 CaCHD1    | TRANSCR transcription regulator activity                                                                |
| CA5065 | 1.1  | 1.1 |      | 0.9 | IPF3584   | 15412520..similar to Saccharomy orf19.3037     | 3584 IPF3584   | TRANSCR RNA binding                                                                                     |
| CA5066 | 1.0  | 0.9 | 0.9  | 0.7 | TPS2      | 15415493..Threalose-6-phosphat orf19.3038      | 3588 CaTPS2    | C-compou hydrolase activity                                                                             |
| CA5067 | 0.7  | 0.8 | 0.8  | 1.1 | IPF3589   | 15418999..putative alcohol acyl tr orf19.3040  | 3589 IPF3589   | CLASSIFIC molecular_function unknown                                                                    |
| CA5068 | 0.9  | 0.9 | 0.9  | 1.1 | IPF3592   | 15421573..unknown function orf19.3041          | 3592 IPF3592   | UNCLASSI molecular_function unknown                                                                     |
| CA5069 | 0.7  | 0.8 | 1.0  | 0.9 | IPF3593   | 15423778..unknown function orf19.3042          | 3593 IPF3593   | No significant S.c. match                                                                               |
| CA5070 | 0.5  | 0.9 | 0.9  | 0.9 | IPF3594   | 15425647..triglyceride lipase (by l orf19.3043 | 3594 IPF3594   | Lipid fatty-ε hydrolase activity                                                                        |
| CA5071 | 0.4  | 0.7 | 0.9  | 0.8 | IPF3597   | complemer similar to Saccharomy orf19.3045     | 3597 IPF3597   | CLASSIFICATION NOT YET CLEAR-CUT                                                                        |
| CA5072 | 1.6  | 1.2 | 1.1  | 1.1 | IPF3598   | complemer similar to Saccharomy orf19.3047     | 3598 IPF3598   | C-compou transcription regulator activity                                                               |
| CA5073 | 1.0  | 1.0 | 1.1  | 1.1 | IPF3603   | complemer unknown function orf19.3048          | 3603 IPF3603   | No significant S.c. match                                                                               |
| CA5074 | 1.1  | 1.0 | 0.8  | 1.0 | IPF3607   | complemer putative serine/threonin orf19.3049  | 3607 IPF3607   | CELL CYC protein kinase activity                                                                        |
| CA5075 | 1.4  | 1.1 | 1.0  | 0.9 | IPF3610   | complemer unknown function orf19.3050          | 3610 IPF3610   | UNCLASSI enzyme regulator activity                                                                      |
| CA5076 | 1.1  | 0.6 |      | 1.1 | IPF15301  | 15442825..unknown function orf19.3051          | 15301 IPF15301 | UNCLASSI molecular_function unknown                                                                     |
| CA5077 | 0.6  |     | 0.9  | 1.1 | YPT1      | 15444263..GTP-binding protein of orf19.3052    | 15299 CaYPT1   | CELLULAF hydrolase activity                                                                             |
| CA5078 | 0.6  |     | 0.6  | 1.3 | IPF15297  | complemer unknown function orf19.3053          | 15297 IPF15297 | No significant S.c. match                                                                               |
| CA5079 | 0.9  | 1.1 |      | 0.9 | RPN3      | 15446623..26S proteasome regul orf19.3054      | 9265 CaRPN3    | PROTEIN I peptidase activity                                                                            |
| CA5080 | 1.0  | 0.9 | 0.9  | 1.1 | IPF9268.3 | 15448391..similar to Saccharomy orf19.3055     | 9268 IPF9268.3 | TRANSCR transcription regulator activity                                                                |
| CA5081 | 0.6  | 1.0 | 0.7  | 1.2 | COQ6      | complemer monooxygenase (by h orf19.3058       | 9273 CaCOQ6    | Metabolism oxidoreductase activity                                                                      |
| CA5082 | 1.5  | 1.4 | 1.0  | 0.8 | SUA70     | complemer TFIIIB subunit (transcrij orf19.3059 | 9274 CaSUA70   | TRANSCR transcription regulator activity                                                                |
| CA5083 | 0.3  | 0.6 | 0.9  | 1.0 | IPF9278   | 15455618..similar to Saccharomy orf19.3060     | 9278 IPF9278   | C-compou transferase activity                                                                           |
| CA5084 | 1.0  | 0.8 | 0.9  | 1.0 | IMP1      | complemer protease, mitochondria orf19.3061    | 9279 CaIMP1    | PROTEIN I peptidase activity                                                                            |
| CA5085 | 0.5  | 1.0 | 0.8  | 1.1 | RPS22.EX1 | complemer ribosomal protein S15a, exon 2 (by l | 9280 CaRPS22.ε | PROTEIN SYNTHESIS SUBCELLULAR LOCALISATION                                                              |
| CA5087 | 1.1  | 1.0 | 0.9  | 1.1 | IPF20025  | complemer unknown function orf19.3062          | 20025 IPF20025 | CELL RES molecular_function unknown                                                                     |
| CA5088 | 1.2  | 0.9 |      | 0.8 | IPF9758   | complemer similar to Saccharomy orf19.3063     | 9758 IPF9758   | CELL CYC nucleotidyltransferase activity                                                                |
| CA5089 | 0.7  | 0.9 | 0.8  | 0.9 | MRPL27    | complemer ribosomal protein (by h orf19.3064   | 9757 CaMRPL27  | PROTEIN 'structural molecule activity                                                                   |
| CA5090 | 1.4  | 1.2 | 1.1  | 0.8 | IFG4      | complemer probable d-amino acid orf19.3065     | 9755 CaIFG4    | No significant S.c. match                                                                               |
| CA5091 | 1.0  | 0.9 | 0.9  | 1.0 | ACF3      | 15467452..endo-1,3-beta-glucana orf19.10584    | 9751 CaACF3    | CLASSIFIC hydrolase activity                                                                            |
| CA5092 | 1.4  | 1.0 | 1.0  | 0.8 | IPF1394   | complemer unknown function orf19.6450          | 1394 IPF1394   | No significant S.c. match                                                                               |
| CA5093 | 1.0  | 1.0 | 1.1  | 1.1 | IPF1390   | complemer unknown function orf19.6449          | 1390 IPF1390   | No significant S.c. match                                                                               |
| CA5094 | 1.1  | 0.9 | 1.0  | 1.2 | IPF1387   | complemer unknown function orf19.6448          | 1387 IPF1387   | No significant S.c. match                                                                               |
| CA5095 | 1.2  | 1.1 | 1.1  | 1.1 | ARF21     | 15479458..GTP-binding protein of orf19.6447    | 1386 CaARF21   | PROTEIN FATE [folding modification destination] ""CELLULAR TRANSPORT AND TRANSPORT MECHANISMS CONTROL C |
| CA5096 | 1.3  | 1.2 | 1.2  | 0.9 | IPF1384   | 15480233..similar to Saccharomy orf19.6445     | 1384 IPF1384   | Lipid fatty-ε isomerase activity                                                                        |
| CA5097 | 1.4  | 1.5 | 1.6  | 1.1 | IPF1382   | 15481253..unknown function orf19.6444          | 1382 IPF1382   | UNCLASSI molecular_function unknown                                                                     |
| CA5098 | 1.5  | 1.1 | 1.0  | 0.8 | IPF1380   | 15483540..delta3-cis-delta2-trans orf19.6443   | 1380 IPF1380   | Lipid fatty-acid and isoprenoid metabolism ""ENERGY SUBCELLULAR LOCALISATION                            |
| CA5099 | 2.3  | 1.3 | 1.5  | 0.9 | PRP8      | complemer U5 snRNP protein, pre orf19.6442     | 1378 CaPRP8    | CELL CYC RNA binding                                                                                    |
| CA5100 | 2.3  | 1.3 | 1.3  | 0.8 | IPF1372   | 15492089..unknown function orf19.6440          | 1372 IPF1372   | UNCLASSI ligase activity                                                                                |
| CA5101 | 1.4  | 0.9 | 0.9  | 0.8 | LCB1      | 15494654..Serine C-palmitoyltran: orf19.6438   | 1370 CaLCB1    | Lipid fatty-ε transferase activity                                                                      |
| CA5102 | 1.0  | 1.1 | 0.9  | 0.9 | CDC23     | complemer Subunit of anaphase-p orf19.6437     | 1368 CaCDC23   | CELL CYC protein binding                                                                                |
| CA5103 | 1.0  | 1.0 | 1.0  | 1.1 | IPF1367   | 15498434..unknown function orf19.6436          | 1367 IPF1367   | No significant S.c. match                                                                               |
| CA5104 | 0.6  | 0.8 | 1.0  | 1.1 | IPF1364   | complemer unknown function orf19.6435          | 1364 IPF1364   | UNCLASSI molecular_function unknown                                                                     |

|        |     |      |     |       |                                           |                                                |                                |                                                                                                            |
|--------|-----|------|-----|-------|-------------------------------------------|------------------------------------------------|--------------------------------|------------------------------------------------------------------------------------------------------------|
| CA5105 | 1.0 | 0.9  | 1.0 | 0.9   | PEX19                                     | 15500780..Required for biogenesis orf19.6434   | 1363 CaPEX19                   | SUBCELLL molecular_function unknown                                                                        |
| CA5106 | 0.9 | 1.1  | 0.9 | 1.0   | AFG2                                      | complemer Member of the Sec18p orf19.6432      | 1361 CaAFG2                    | UNCLASSI hydrolase activity                                                                                |
| CA5107 | 0.8 | 0.9  | 0.9 | 1.1   | IPF1358                                   | 15504327..unknown function orf19.6431          | 1358 IPF1358                   | No significant S.c. match                                                                                  |
| CA5108 | 1.1 | 1.2  | 1.0 | 1.1   | SK12                                      | complemer Antiviral protein and pu orf19.6425  | 1354 CaSK12                    | CELL RES RNA binding,helicase activity,translation regulator activity                                      |
| CA5109 | 0.8 | 0.8  | 1.1 | 1.0   | UBC9                                      | 15508929..E2 ubiquitin-conjugatin orf19.6424   | 1348 CaUBC9                    | CELL CYCLE AND DNA PROCESSING ""PROTEIN FATE [folding modification destination] ""SUBCELLULAR LOCALISATION |
| CA5110 | 0.9 | 0.9  | 1.0 | 1.0   | FBP26                                     | complemer Fructose-2,6-bisphosp orf19.6423     | 1347 CaFBP26                   | C-compour hydrolase activity                                                                               |
| CA5111 | 1.4 | 1.1  | 1.0 | 1.1   | SSY5                                      | 15511240..Involved in sulfonylure:orf19.6422   | 1345 CaSSY5                    | REGULATION OF/INTERACTION WITH CELLULAR ENVIRONMENT                                                        |
| CA5112 | 0.9 | 0.9  | 0.4 | 1.8   | IPF1341                                   | complemer Similarity to mucin prot orf19.6420  | 1341 IPF1341                   | No significant S.c. match                                                                                  |
| CA5113 | 1.2 | 0.9  | 0.9 | 0.8   | IPF20026                                  | complemer unknown function orf19.6418          | 20026 IPF20026                 | UNCLASSI molecular_function unknown                                                                        |
| CA5114 | 0.7 | 1.2  | 1.2 | 1.0   | IPF1334                                   | complemer Conserved hypothetica:orf19.6417     | 1334 IPF1334                   | UNCLASSI molecular_function unknown                                                                        |
| CA5115 | 0.4 | 1.2  | 0.9 | 1.0   | IPF1331                                   | complemer unknown function orf19.6416          | 1331 IPF1331                   | UNCLASSI molecular_function unknown                                                                        |
| CA5116 | 0.2 | 0.5  |     | 0.9   | TPM2.3                                    | complemer Tropomyosin, 3-prime end             | 1325 CaTPM2.3                  | CELL FATfprotein binding                                                                                   |
| CA5117 | 0.7 | 1.1  | 0.9 | 1.0   | IPF1323                                   | 15530494..unknown function orf19.6414          | 1323 IPF1323                   | No significant S.c. match                                                                                  |
| CA5118 | 0.7 | 1.0  | 1.2 | 0.9   | IPF1321                                   | complemer unknown function orf19.6413          | 1321 IPF1321                   | No significant S.c. match                                                                                  |
| CA5119 | 0.8 | 1.0  | 1.2 | 1.0   | IPF1320                                   | complemer unknown function orf19.6411          | 1320 IPF1320                   | UNCLASSI enzyme regulator activity                                                                         |
| CA5120 | 0.7 | 1.2  | 0.9 | 1.1   | YDJ1                                      | complemer Mitochondrial and ER i orf19.6408    | 1317 CaYDJ1                    | CELL CYCLE AND DNA PROCESSING ""PROTEIN FATE [folding modification destination] ""CELLULAR TRANSPORT AND 1 |
| CA5121 | 1.4 | 1.1  | 0.9 | 0.8   | IPF1310                                   | complemer unknown function orf19.6407          | 1310 IPF1310                   | PROTEIN I molecular_function unknown                                                                       |
| CA5122 | 0.4 | 1.1  | 0.9 | 1.1   | IPF1308                                   | 15541942..Similarity to ribosomal orf19.6406   | 1308 IPF1308                   | PROTEIN :molecular_function unknown                                                                        |
| CA5123 | 0.8 | 1.0  | 0.9 | 1.2   | IPF1306                                   | 15543459..unknown function orf19.6405          | 1306 IPF1306                   | UNCLASSI molecular_function unknown                                                                        |
| CA5124 | 1.0 | 1.0  |     | 0.8   | GSH2                                      | complemer Glutathione synthetase orf19.6404    | 1304 CaGSH2                    | Metabolism r ligase activity                                                                               |
| CA5125 | 0.3 | 0.4  | 0.7 | 1.2   | RPP2                                      | 15546934..acidic ribosomal protein by homolog  | 5111 CaRPP2                    | PROTEIN I structural molecule activity                                                                     |
| CA5126 | 0.9 | 0.8  | 0.9 | 1.0   | SLS1                                      | complemer Endoplasmic transloca orf19.6403     | 5113 CaSLS1                    | PROTEIN I molecular_function unknown                                                                       |
| CA5127 | 0.9 | 0.9  | 0.8 | 0.8   | CYS3                                      | complemer cystathionine gamma-l orf19.6402     | 5115 CaCYS3                    | Amino acid lyase activity                                                                                  |
| CA5128 | 0.8 | 1.0  | 5.4 | 1.1   | IPF5118                                   | complemer unknown function orf19.13758         | 5118 IPF5118                   | UNCLASSI molecular_function unknown                                                                        |
| CA5129 | 0.8 | 0.8  | 1.0 | 1.0   | ATS1                                      | complemer similar to Saccharomy:orf19.13757    | 5119 CaATS1                    | SUBCELLL molecular_function unknown                                                                        |
| CA5130 | 0.8 | 1.0  | 0.9 | 1.2   | IFH2                                      | 15553854..Dioxygenase (by homc orf19.13756     | 5121 CaIFH2                    | CELL RESCUE DEFENSE AND VIRULENCE                                                                          |
| CA5131 |     |      |     |       | IPF5124                                   | 15555334..15559494                             |                                |                                                                                                            |
| CA5132 | 0.9 | 1.1  | 0.6 | 0.9   | GTS1                                      | complemer Transcription factor by orf19.6393   | 5128 CaGTS1                    | CELL CYC molecular_function unknown                                                                        |
| CA5133 | 1.4 | 0.9  | 0.9 | 1.1   | IPF5129                                   | complemer unknown function orf19.6392          | 5129 IPF5129                   | No significant S.c. match                                                                                  |
| CA5134 | 1.4 | 0.9  | 1.2 | 1.0   | IPF5131                                   | complemer unknown function orf19.6391          | 5131 IPF5131                   | No significant S.c. match                                                                                  |
| CA5135 | 0.8 | 2.0  | 1.0 | 1.1   | HSP104                                    | 15564334..Heat shock protein (by orf19.13747   | 5137 CaHSP104                  | PROTEIN I chaperone activity                                                                               |
| CA5136 | 1.3 | 0.9  | 1.1 | 1.1   | IPF5139                                   | 15568890..unknown function orf19.13743         | 5139 IPF5139                   | No significant S.c. match                                                                                  |
| CA5137 | 1.0 | 1.6  | 1.1 | 0.9   | IPF1032                                   | 15572535..similar to probable mer orf19.4574   | 1032 IPF1032                   | UNCLASSI molecular_function unknown                                                                        |
| CA5138 | 1.7 | 1.0  | 1.1 | 0.8   | IPF1031                                   | 15574679..Similar to aminoglycos orf19.4575    | 1031 IPF1031                   | CLASSIFIC molecular_function unknown                                                                       |
| CA5139 | 1.1 | 0.9  | 1.3 | 0.9   | IPF1027                                   | 15577328..unknown function orf19.4577          | 1027 IPF1027                   | UNCLASSI signal transducer activity                                                                        |
| CA5140 | 1.0 | 0.9  |     | 0.9   | TIM10                                     | 15580869..Subunit of the Tim22-complex (by hc  | 1024 CaTIM10                   | No significant S.c. match                                                                                  |
| CA5141 | 1.1 | 0.9  | 1.0 | 1.0   | CYT2                                      | complemer holocytochrome-c1 syr orf19.4578     | 1023 CaCYT2                    | Metabolism r lyase activity                                                                                |
| CA5142 |     | 1.0  | 0.8 | 1.0   | IPF1022                                   | complemer similar to Saccharomy:orf19.4579     | 1022 IPF1022                   | UNCLASSI molecular_function unknown                                                                        |
| CA5143 | 0.7 | 0.9  | 0.9 | 1.1   | IPF1020                                   | complemer Weak similarity to N. c orf19.4580   | 1020 IPF1020                   | UNCLASSIFIED PROTEINS                                                                                      |
| CA5144 | 0.6 | 0.9  |     | 1.0   | IPF1019                                   | 15585165..unknown function orf19.4581          | 1019 IPF1019                   | UNCLASSI transferase activity                                                                              |
| CA5145 | 1.1 | 0.9  | 0.9 | 1.0   | SK16                                      | 15586468..3->5 exoribonuclease orf19.4582      | 1018 CaSK16                    | No significant S.c. match                                                                                  |
| CA5146 | 1.1 | 1.0  | 1.1 | 0.9   | YMC2                                      | complemer Carnitine/acylcarnitine orf19.4583   | 1017 CaYMC2                    | CELLULAR TRANSPORT AND TRANSPORT MECHANISMS SUBCELLULAR LOCALISATION                                       |
| CA5147 | 1.3 | 0.3  | 1.0 | 0.8   | PHO12                                     | complemer Acid phosphatase, sec orf19.4584     | 1016 CaPHO12                   | Phosphate metabolism SUBCELLULAR LOCALISATION                                                              |
| CA5148 | 1.0 | 0.8  |     | 1.0   | TFG1                                      | 15590768..RNA pol.II transcription orf19.4585  | 1015 CaTFG1                    | TRANSCR transcription regulator activity                                                                   |
| CA5149 | 0.8 | 1.1  | 1.1 | 1.1   | HGH1                                      | complemer Similar to human HMG orf19.4587      | 1013 CaHGH1                    | UNCLASSI molecular_function unknown                                                                        |
| CA5150 | 0.9 | 1.2  | 1.1 | 1.3   | FMS1                                      | complemer Similar to corticosteroid orf19.4589 | 1011 CaFMS1                    | Metabolism oxidoreductase activity                                                                         |
| CA5151 | 0.3 | 0.3  | 0.4 | 0.9   | IPF1009                                   | complemer Weak similarity to S. c orf19.4590   | 1009 IPF1009                   | TRANSCRIPTION SUBCELLULAR LOCALISATION                                                                     |
| CA5152 | 2.9 | 1.9  | 2.7 | 1.4   | CAT2                                      | complemer carnitine O-acetyltrans orf19.4591   | 1006 CaCAT2                    | Lipid fatty-ε transferase activity                                                                         |
| CA5153 | 1.3 | 0.8  | 0.8 | 1.0   | IPF1003                                   | 15607847..unknown function orf19.4592          | 1003 IPF1003                   | No significant S.c. match                                                                                  |
| CA5154 | 1.3 | 1.6  | 1.4 | 1.1   | RGA2                                      | 15612572..rho-GTPase activating orf19.4593     | 1000 CaRGA2                    | CELL FATf signal transducer activity                                                                       |
| CA5155 | 1.4 | 1.0  | 0.9 | 0.8   | IPF995                                    | complemer unknown function                     | 995 IPF995                     | UNCLASSI molecular_function unknown                                                                        |
| CA5156 | 1.5 | 1.0  | 1.0 | 0.7   | CLC1                                      | 15616949..clathrin light chain (by orf19.4594  | 994 CaCLC1                     | CELLULAF structural molecule activity                                                                      |
| CA5157 | 0.9 | 1.0  | 1.2 | 1.0   | IPF993                                    | complemer unknown function orf19.4595          | 993 IPF993                     | No significant S.c. match                                                                                  |
| CA5158 | 1.3 | 0.9  | 0.7 | 1.0   | IPF992                                    | 15619879..unknown function orf19.4596          | 992 IPF992                     | No significant S.c. match                                                                                  |
| CA5159 | 1.3 | 1.0  | 1.0 | 0.8   | CAP2                                      | complemer F-actin capping protein orf19.4597   | 990 CaCAP2                     | CELL FATf protein binding                                                                                  |
| CA5160 | 6.9 | 19.5 | 1.8 | PHO89 | complemer Na+-coupled phosphat orf19.4599 | 988 CaPHO89                                    | Phosphate transporter activity |                                                                                                            |
| CA5161 | 1.2 | 1.2  | 0.9 | 1.1   | IPF983                                    | 15628986..unknown function orf19.4600          | 983 IPF983                     | UNCLASSI molecular_function unknown                                                                        |
| CA5162 | 0.8 | 0.8  | 1.1 | 1.0   | IPF982                                    | complemer Weakly similar to human dolichol-ph  | 982 IPF982                     | No significant S.c. match                                                                                  |
| CA5163 | 0.8 | 1.0  | 0.9 | 1.2   | TFC1                                      | complemer Transcription initiation orf19.4601  | 6022 CaTFC1                    | TRANSCR transcription regulator activity                                                                   |
| CA5164 | 0.8 | 0.5  | 0.7 | 0.7   | MDH1                                      | 15632903..Mitochondrial malate d orf19.4602    | 6025 CaMDH1                    | C-compour oxidoreductase activity                                                                          |
| CA5165 | 0.7 | 1.1  |     | 1.0   | ARL1                                      | 15634415..GTP-binding protein of orf19.4603    | 6027 CaARL1                    | PROTEIN I hydrolase activity                                                                               |
| CA5166 | 1.1 | 0.6  |     | 1.0   | TYR1                                      | complemer Prephenate dehydroge orf19.4605      | 6029 CaTYR1                    | Amino acid oxidoreductase activity                                                                         |
| CA5167 | 1.2 | 1.0  | 0.9 | 0.9   | ERG8                                      | 15636640..Phosphomevalonate ki orf19.4606      | 6030 CaERG8                    | Lipid fatty-ε transferase activity                                                                         |
| CA5168 | 1.0 | 0.6  | 1.2 | 1.1   | IPF6032                                   | 15638410..unknown function orf19.4607          | 6032 IPF6032                   | UNCLASSIFIED PROTEINS                                                                                      |
| CA5170 | 0.7 | 0.9  | 1.1 | 0.9   | PDC12.EX                                  | 15640027..Pyruvate decarboxylas orf19.4608     | 6036 CaPDC12.                  | (C-compound and carbohydrate metabolism ENERGY SUBCELLULAR LOCALISATION                                    |
| CA5171 | 0.6 | 0.5  |     | 0.9   | IPF6037                                   | 15642439..Similar to Legionella pr orf19.4609  | 6037 IPF6037                   | UNCLASSI molecular_function unknown                                                                        |
| CA5172 | 1.3 | 1.2  | 1.0 | 0.8   | CPS2.5F                                   | 15643464..Carboxypeptidase YSc orf19.4610      | 6038 CaCPS2.5F                 | PROTEIN FATE [folding modification destination] ""SUBCELLULAR LOCALISATION                                 |
| CA5173 | 1.0 | 1.2  | 0.9 | 0.9   | CPS2.3F                                   | 15644533..Carboxypeptidase YSc precursor,      | 18130 CaCPS2.3F                | PROTEIN FATE [folding modification destination] ""SUBCELLULAR LOCALISATION                                 |
| CA5174 | 0.9 | 1.2  | 1.1 | 1.1   | PRS4                                      | 15645480..Ribose-phosphate pyr orf19.4611      | 6040 CaPRS4                    | Nucleotide transferase activity                                                                            |
| CA5175 | 0.8 | 0.7  |     | 1.0   | IPF6041                                   | complemer Similar to Legionella pr orf19.4612  | 6041 IPF6041                   | UNCLASSIFIED PROTEINS                                                                                      |
| CA5176 | 0.8 | 1.1  | 1.0 | 1.1   | IPF6045                                   | complemer unknown function orf19.4614          | 6045 IPF6045                   | UNCLASSI molecular_function unknown                                                                        |

|        |     |     |     |     |            |                                                       |       |            |                                                                                               |                                                   |                                                       |                 |           |          |
|--------|-----|-----|-----|-----|------------|-------------------------------------------------------|-------|------------|-----------------------------------------------------------------------------------------------|---------------------------------------------------|-------------------------------------------------------|-----------------|-----------|----------|
| CA5177 | 1.0 | 0.9 | 1.1 | 1.0 | IPF11101   | 15653368..Weak similarity to C. crorf19.4615          | 11101 | IPF11101   | UNCLASSI                                                                                      | molecular_function                                | unknown                                               |                 |           |          |
| CA5178 | 0.2 | 0.8 | 1.7 | 1.0 | POL30      | complemer Proliferating Cell Nucleorf19.4616          | 20027 | CaPOL30    | CELL                                                                                          | CYC nucleotidyltransferase                        | activity                                              |                 |           |          |
| CA5179 | 0.9 | 1.0 | 1.1 | 1.0 | MAK3       | complemer N-acetyltransferase (b)orf19.4617           | 11098 | CaMAK3     | PROTEIN                                                                                       | Itransferase                                      | activity                                              |                 |           |          |
| CA5180 | 0.5 | 1.8 | 0.8 | 0.7 | FBA1       | 15657313..fructose-bisphosphate orf19.4618            | 11096 | CaFBA1     | C-compour                                                                                     | lyase                                             | activity                                              |                 |           |          |
| CA5181 | 1.3 | 1.0 | 1.0 | 0.8 | TIM12      | complemer subunit of the TIM22-c orf19.4620           | 11094 | CaTIM12    | PROTEIN                                                                                       | Itransporter                                      | activity                                              |                 |           |          |
| CA5182 | 1.0 | 0.8 | 1.1 | 1.0 | IPF11093   | 15659318..weak similarity to pig t orf19.4621         | 11093 | IPF11093   | UNCLASSI                                                                                      | molecular_function                                | unknown                                               |                 |           |          |
| CA5183 | 1.4 | 1.2 | 1.1 | 0.9 | IPF11090.f | 15662288..weak similarity to glute orf19.4622         | 11090 | IPF11090.e | UNCLASSI                                                                                      | molecular_function                                | unknown                                               |                 |           |          |
| CA5184 | 0.9 | 1.0 | 1.2 | 0.9 | IPF11090.f | 15663575..weak similarity to glutenin, exon 2         | 11086 | IPF11090.e | No significant                                                                                | S.c. match                                        |                                                       |                 |           |          |
| CA5185 | 0.3 | 0.5 | 0.5 | 0.5 | NHP6A      | 15666811..nonhistone chromosomal protein rel          | 10163 | CaNHP6A    | CELL                                                                                          | FATIDNA                                           | binding                                               |                 |           |          |
| CA5186 | 1.7 | 1.1 | 1.1 | 0.9 | HRT2       | 15668014.. Similar to SchRT2 (by orf19.4624           | 10162 | CaHRT2     | CLASSIFIC                                                                                     | molecular_function                                | unknown                                               |                 |           |          |
| CA5187 | 0.8 | 0.9 | 0.9 | 1.0 | TOA2       | complemer TFIIA subunit 13.5 kD orf19.4625            | 10160 | CaTOA2     | TRANSCR                                                                                       | transcription regulator                           | activity                                              |                 |           |          |
| CA5188 | 0.9 | 1.0 | 1.0 | 1.0 | TAP42      | 15670275.. Component of the Tor orf19.4626            | 10159 | CaTAP42    | CELL                                                                                          | CYC protein                                       | binding                                               |                 |           |          |
| CA5189 | 2.3 | 1.3 | 1.2 | 0.9 | IPF10158   | complemer Weak similarity to ScN orf19.4627           | 10158 | IPF10158   | TRANSCR                                                                                       | structural molecule                               | activity                                              |                 |           |          |
| CA5190 | 1.0 | 1.0 | 1.1 | 1.2 | IPF10155   | 15675194..unknown function orf19.4628                 | 10155 | IPF10155   | UNCLASSI                                                                                      | molecular_function                                | unknown                                               |                 |           |          |
| CA5191 | 0.9 | 0.9 | 1.0 | 1.2 | IPF19538   | complemer partially similar to Isocitrate dehydro     | 19538 | IPF19538   | C-compound and carbohydrate metabolism                                                        | ENERGY TRANSCRIPTION SUBCELLULAR LOCALISATION     |                                                       |                 |           |          |
| CA5192 | 1.3 | 1.1 | 1.1 | 1.0 | HOK        | 15690495..unknown function orf19.7004                 | 17447 | CaHOK      | No significant                                                                                | S.c. match                                        |                                                       |                 |           |          |
| CA5194 | 1.2 | 1.0 | 1.2 | 1.1 | IPF11756   | 15695156..unknown function orf19.7006                 | 11756 | IPF11756   | No significant                                                                                | S.c. match                                        |                                                       |                 |           |          |
| CA5195 | 0.8 | 1.0 | 0.9 | 0.9 | GRP8       | complemer Similarity to dihydroflav orf19.7009        | 2336  | CaGRP8     | Metabolism of vitamins cofactors and prosthetic groups                                        |                                                   |                                                       |                 |           |          |
| CA5196 | 1.1 | 0.9 | 0.7 | 1.0 | IPF2338    | 15706958..unknown function orf19.7010                 | 2338  | IPF2338    | UNCLASSI                                                                                      | molecular_function                                | unknown                                               |                 |           |          |
| CA5197 | 1.0 | 1.4 | 1.0 | 1.1 | IPF2342    | 15708991..unknown function orf19.7011                 | 2342  | IPF2342    | UNCLASSI                                                                                      | molecular_function                                | unknown                                               |                 |           |          |
| CA5198 | 0.9 | 0.9 | 1.0 | 1.0 | LPA4       | 15712803.. Similar to ribosomal pr orf19.7012         | 2343  | CaLPA4     | PROTEIN                                                                                       | Istructural molecule                              | activity                                              |                 |           |          |
| CA5199 | 0.6 | 0.9 | 1.3 | 0.9 | IPF2334    | complemer unknown function orf19.7013                 | 2344  | IPF2334    | CELL                                                                                          | CYCLE AND DNA PROCESSING SUBCELLULAR LOCALISATION |                                                       |                 |           |          |
| CA5200 | 0.3 | 0.9 | 0.6 | 1.1 | RPL10E     | complemer Ribosomal protein L10 orf19.7015            | 2347  | CaRPL10E   | PROTEIN                                                                                       | Istructural molecule                              | activity                                              |                 |           |          |
| CA5201 | 1.3 | 0.9 | 0.9 | 1.1 | IPF2349    | complemer similar to human sphin orf19.7016           | 2349  | IPF2349    | Lipid fatty- $\alpha$                                                                         | hydrolase                                         | activity                                              |                 |           |          |
| CA5202 | 1.0 | 0.9 | 0.9 | 1.1 | YOX1       | 15721529.. Similar to homoeodm orf19.7017             | 2351  | CaYOX1     | TRANSCR                                                                                       | DNA                                               | binding                                               |                 |           |          |
| CA5203 | 0.3 | 0.7 | 0.8 | 1.0 | RPS18      | complemer Ribosomal protein S18 orf19.7018            | 2353  | CaRPS18    | PROTEIN                                                                                       | Istructural molecule                              | activity                                              |                 |           |          |
| CA5204 | 1.2 | 1.0 | 0.6 | 1.1 | YML6       | complemer Ribosomal protein, mit orf19.7019           | 2354  | CaYML6     | PROTEIN                                                                                       | Istructural molecule                              | activity                                              |                 |           |          |
| CA5205 | 0.7 | 1.1 | 1.1 | 0.9 | KEX1       | complemer Carboxypeptidase- $\alpha$ 1p orf19.7020    | 2356  | CaKEX1     | PROTEIN                                                                                       | Ipeptidase                                        | activity                                              |                 |           |          |
| CA5206 | 0.5 | 1.1 | 0.9 | 0.6 | GPH1       | complemer Glycogen phosphoryla orf19.7021             | 2357  | CaGPH1     | C-compour                                                                                     | transferase                                       | activity                                              |                 |           |          |
| CA5207 | 1.1 | 0.8 | 0.9 | 1.0 | IPF2359    | 15735088..unknown function orf19.7022                 | 2359  | IPF2359    | No significant                                                                                | S.c. match                                        |                                                       |                 |           |          |
| CA5208 | 1.1 | 0.8 | 0.9 | 1.1 | IPF2361    | 15736314..unknown function orf19.7023                 | 2361  | IPF2361    | UNCLASSI                                                                                      | molecular_function                                | unknown                                               |                 |           |          |
| CA5209 | 1.5 | 1.0 | 1.1 | 0.9 | MCM1       | 15738758.. Transcription factor of orf19.7025         | 2363  | CaMCM1     | Amino acid                                                                                    | DNA                                               | binding                                               |                 |           |          |
| CA5210 | 1.0 | 1.0 | 1.2 | 1.2 | IPF2373    | 15748251..unknown function orf19.7027                 | 2373  | IPF2373    | No significant                                                                                | S.c. match                                        |                                                       |                 |           |          |
| CA5211 | 1.3 | 0.9 | 0.9 | 1.0 | IPF18125   | 15750117..similar to glutenin and orf19.7028          | 18125 | IPF18125   | No significant                                                                                | S.c. match                                        |                                                       |                 |           |          |
| CA5212 | 1.0 | 1.0 | 1.0 | 1.0 | IPF3050    | complemer unknown function orf19.7029                 | 3050  | IPF3050    | CLASSIFIC                                                                                     | hydrolase                                         | activity                                              |                 |           |          |
| CA5213 | 0.8 | 0.5 | 0.9 | 0.7 | SSR1       | complemer Secretory Stress Resp orf19.7030            | 3054  | CaSSR1     | No significz                                                                                  | structural molecule                               | activity                                              |                 |           |          |
| CA5214 | 1.1 | 1.5 | 1.2 | 1.2 | IPF19807   | complemer unknown function orf19.7032                 | 19807 | IPF19807   | Amino acid                                                                                    | metabolism                                        | SUBCELLULAR LOCALISATION                              |                 |           |          |
| CA5215 | 0.8 | 0.9 | 0.9 | 1.0 | PPS1       | 15764307..protein tyrosine phospl orf19.7033          | 3063  | CaPPS1     | CELL                                                                                          | CYC protein phosphatase                           | activity                                              |                 |           |          |
| CA5216 | 1.3 | 1.1 | 1.2 | 1.0 | IPF3069    | 15767764..unknown function orf19.7034                 | 3069  | IPF3069    | No significant                                                                                | S.c. match                                        |                                                       |                 |           |          |
| CA5217 | 1.0 | 0.8 | 0.7 | 1.0 | RFC2       | complemer Replication factor (by t orf19.7035         | 3070  | CaRFC2     | CELL                                                                                          | CYC DNA                                           | binding                                               |                 |           |          |
| CA5218 | 0.8 | 1.2 | 1.1 | 1.1 | WHI2       | complemer Growth regulation fact orf19.7036           | 3073  | CaWHI2     | CELL                                                                                          | FATenzyme                                         | regulator                                             | activity        |           |          |
| CA5219 | 1.7 | 1.2 | 1.3 | 1.1 | YAE1       | 15773683..Essential protein orf19.7037                | 3074  | CaYAE1     | UNCLASSI                                                                                      | molecular_function                                | unknown                                               |                 |           |          |
| CA5220 | 0.9 | 1.0 | 1.0 | 0.9 | MVP1.EXC   | complemer Required for vacuolar jorf19.7038           | 3075  | CaMVP1.e   | PROTEIN                                                                                       | I                                                 | molecular_function                                    | unknown         |           |          |
| CA5221 | 1.0 | 1.0 | 1.4 | 0.9 | MVP1.EXC   | complemer Required for vacuolar jorf19.7039           | 3076  | CaMVP1.e   | PROTEIN                                                                                       | FATE [folding modification destination] ""        | CELLULAR TRANSPORT AND TRANSPORT MECHANISMS SUBCELLUL |                 |           |          |
| CA5222 | 1.5 | 1.0 | 1.1 | 0.9 | IPF3079    | complemer similar to Saccharomy orf19.7041            | 3079  | IPF3079    | TRANSCR                                                                                       | RNA                                               | binding                                               |                 |           |          |
| CA5223 | 1.1 | 1.2 | 1.0 | 1.0 | IPF3080    | complemer unknown function (by t orf19.7042           | 3080  | IPF3080    | No significant                                                                                | S.c. match                                        |                                                       |                 |           |          |
| CA5224 | 1.1 | 0.9 | 0.9 | 1.0 | IPF3081    | 15783003..unknown function orf19.7043                 | 3081  | IPF3081    | UNCLASSI                                                                                      | molecular_function                                | unknown                                               |                 |           |          |
| CA5225 | 0.8 | 1.0 | 1.1 | 1.1 | ACB1.EXO   | complemer acyl-coenzyme-A-binding protein, $\epsilon$ | 3082  | CaACB1.e   | Lipid fatty- $\alpha$                                                                         | transporter                                       | activity                                              |                 |           |          |
| CA5226 | 1.9 | 1.3 | 1.3 | 0.9 | RIM15      | complemer Protein kinase involvec orf19.7044          | 3086  | CaRIM15    | TRANSCR                                                                                       | protein kinase                                    | activity                                              |                 |           |          |
| CA5227 | 0.8 | 1.3 | 1.2 | 1.0 | IPF3087    | complemer unknown function orf19.7046                 | 3087  | IPF3087    | Amino acid                                                                                    | DNA                                               | binding                                               |                 |           |          |
| CA5228 | 1.1 | 1.2 | 1.1 | 1.1 | RTF1.3EO   | complemer Regulates DNA binding orf19.7047            | 3088  | CaRTF1.3e  | TRANSCR                                                                                       | transcription regulator                           | activity                                              |                 |           |          |
| CA5229 | 0.8 | 0.9 | 1.1 | 1.1 | IPF10425   | 15795157..unknown function orf19.5035                 | 10425 | IPF10425   | CELL                                                                                          | CYC transcription regulator                       | activity                                              |                 |           |          |
| CA5230 | 1.2 | 0.8 | 0.9 | 0.9 | IPF10424   | complemer unknown function orf19.5034                 | 10424 | IPF10424   | UNCLASSI                                                                                      | molecular_function                                | unknown                                               |                 |           |          |
| CA5231 | 0.8 | 0.9 | 0.9 | 1.1 | IPF10422   | 15799197.. Similar to APG12, com orf19.5033           | 10422 | IPF10422   | PROTEIN                                                                                       | I                                                 | molecular_function                                    | unknown         |           |          |
| CA5232 | 0.8 | 0.6 | 0.7 | 0.7 | SUN42      | complemer Putative cell wall beta- orf19.5032         | 10421 | CaSUN42    | CELL                                                                                          | CYCLE AND DNA PROCESSING CELL FATE                |                                                       |                 |           |          |
| CA5233 | 1.2 | 1.4 | 1.1 | 1.3 | SSK1       | complemer Putative reponse regul orf19.5031           | 3012  | CaSSK1     | C-compour                                                                                     | signal transducer                                 | activity,transcription regulator                      | activity,enzyme | regulator | activity |
| CA5234 | 1.5 | 1.0 | 1.1 | 0.9 | IPF3014    | complemer weak similarity to S. ce orf19.5030         | 3014  | IPF3014    | UNCLASSI                                                                                      | molecular_function                                | unknown                                               |                 |           |          |
| CA5235 | 1.1 | 1.2 | 1.4 | 1.4 | IPF3015    | 15809952.. Similar to E.coli modF orf19.5029          | 3015  | IPF3015    | CELL                                                                                          | CYC transporter                                   | activity,hydrolase                                    | activity        |           |          |
| CA5236 | 1.5 | 1.1 | 1.0 | 1.0 | LCB2       | 15812272.. Palmitoyl transferase ( orf19.5027         | 3017  | CaLCB2     | Lipid fatty- $\alpha$                                                                         | transferase                                       | activity                                              |                 |           |          |
| CA5237 | 3.4 | 1.6 | 1.8 | 1.0 | ZMS1       | 15818471.. Zinc Finger Protein C2 orf19.5026          | 3021  | CaZMS1     | TRANSCR                                                                                       | molecular_function                                | unknown                                               |                 |           |          |
| CA5238 | 2.0 | 1.1 | 1.0 | 0.8 | MET3       | complemer ATP sulfurlyase orf19.5025                  | 3022  | CaMET3     | Amino acid                                                                                    | nucleotidyltransferase                            | activity                                              |                 |           |          |
| CA5239 | 0.4 | 0.2 | 0.4 | 0.6 | GND1       | 15827975.. 6-phosphogluconate di orf19.5024           | 3028  | CaGND1     | C-compour                                                                                     | oxidoreductase                                    | activity                                              |                 |           |          |
| CA5240 | 0.9 | 1.3 | 1.1 | 1.3 | IPF3032    | 15830354..allantoate permease (t orf19.5023           | 3032  | IPF3032    | TRANSPORT                                                                                     | FACILITATION                                      |                                                       |                 |           |          |
| CA5241 | 1.2 | 1.0 | 1.1 | 1.0 | SMF3       | complemer Probable manganese t orf19.5022             | 3034  | CaSMF3     | PROTEIN                                                                                       | FATE [folding modification destination] ""        | CELLULAR TRANSPORT AND TRANSPORT MECHANISMS REGULATIO |                 |           |          |
| CA5242 | 0.6 | 0.9 | 0.9 | 1.3 | PDX1       | 15835165.. Pyruvate dehydrogena orf19.5021            | 3038  | CaPDX1     | C-compour                                                                                     | proteuin                                          | binding                                               |                 |           |          |
| CA5243 | 1.2 | 1.1 | 0.9 | 1.1 | IPF3040    | 15836861..unknown function orf19.5020                 | 3040  | IPF3040    | No significant                                                                                | S.c. match                                        |                                                       |                 |           |          |
| CA5244 | 0.6 | 0.9 | 0.9 | 1.0 | IPF3043    | complemer unknown function orf19.5019                 | 3043  | IPF3043    | No significant                                                                                | S.c. match                                        |                                                       |                 |           |          |
| CA5245 | 1.1 | 0.9 | 1.0 | 1.0 | DUR32      | 15841924.. Urea transport protein orf19.5017          | 3048  | CaDUR32    | REGULATION OF/INTERACTION WITH CELLULAR ENVIRONMENT SUBCELLULAR LOCALISATION TRANSPORT FACILI |                                                   |                                                       |                 |           |          |
| CA5246 | 0.8 | 1.0 | 1.2 | 1.0 | IPF19808   | 15844117..unknown function orf19.5016                 | 19808 | IPF19808   | No significant                                                                                | S.c. match                                        |                                                       |                 |           |          |
| CA5247 | 0.7 | 0.9 | 0.5 | 1.3 | MYO2       | complemer Myosin heavy chain (b orf19.5015            | 13531 | CaMYO2     | CELLULAF                                                                                      | motor                                             | activity                                              |                 |           |          |
| CA5248 | 0.8 | 1.0 | 1.1 | 1.0 | IPF1828    | 15851987..unknown function orf19.5014                 | 1828  | IPF1828    | UNCLASSI                                                                                      | molecular_function                                | unknown                                               |                 |           |          |



|        |     |     |     |     |            |                                                  |                 |                                                                                                             |
|--------|-----|-----|-----|-----|------------|--------------------------------------------------|-----------------|-------------------------------------------------------------------------------------------------------------|
| CA5249 | 1.0 | 0.9 | 0.9 | 1.1 | PCM1       | complemer phosphoacetylglucosar orf19.5013       | 1827 CaPCM1     | C-compour isomerase activity                                                                                |
| CA5250 | 1.2 | 0.9 | 1.0 | 1.1 | IPF1826    | 15854644..unknown function orf19.5012            | 1826 IPF1826    | No significant S.c. match                                                                                   |
| CA5251 | 0.8 | 1.0 | 1.2 | 1.0 | IPF1824    | complemer unknown function orf19.5011            | 1824 IPF1824    | CELL CYC molecular_function unknown                                                                         |
| CA5252 | 0.9 | 0.9 | 1.0 | 0.9 | DIM1       | 15858440..rRNA (adenine-N6,N6- orf19.5010        | 1822 CaDIM1     | TRANSCR transferase activity                                                                                |
| CA5253 | 1.3 | 1.0 | 1.0 | 0.8 | KEL3       | complemer Kelch-repeat protein orf19.5009        | 1821 CaKEL3     | UNCLASSImolecular_function unknown                                                                          |
| CA5254 | 0.8 | 0.9 | 0.8 | 0.9 | IPF1820    | 15861698..unknown function                       | 1820 IPF1820    | UNCLASSIstructural molecule activity                                                                        |
| CA5255 | 0.4 | 0.5 | 0.5 | 1.3 | ACT1       | complemer actin (by homology) orf19.5007         | 1819 CaACT1     | CELL CYC structural molecule activity                                                                       |
| CA5257 | 1.2 | 0.7 | 0.9 | 1.0 | SNC2.EXC   | 15865513..Strong similarity to synaptobrevin, e  | 1811 CaSNC2.e   | PROTEIN Itransporter activity                                                                               |
| CA5258 | 1.1 | 1.4 | 9.8 | 1.1 | GCV3       | 15866499..Glycine decarboxylase orf19.5006       | 1809 CaGCV3     | Amino acid oxidoreductase activity                                                                          |
| CA5259 | 1.6 | 1.3 | 1.4 | 1.2 | OSM2       | complemer Osmotic growth proteir orf19.5005      | 1808 CaOSM2     | ENERGY ""CELL RESCUE DEFENSE AND VIRULENCE ""SUBCELLULAR LOCALISATION                                       |
| CA5260 | 0.9 | 0.9 | 1.1 | 0.9 | RAD54      | complemer DNA-dependent ATPa orf19.5004          | 1807 CaRAD54    | CELL CYC DNA binding                                                                                        |
| CA5261 | 1.1 | 1.2 | 0.6 | 1.1 | IPF1805    | 15872431..unknown function orf19.5003            | 1805 IPF1805    | UNCLASSIenzyme regulator activity,protein binding                                                           |
| CA5262 | 1.8 | 1.1 | 0.7 | 1.1 | IPF1804    | complemer putative transcription f orf19.5001    | 1804 IPF1804    | TRANSCR transcription regulator activity                                                                    |
| CA5263 | 2.1 | 1.3 |     | 0.8 | CYB3       | complemer Lactate dehydrogenasi orf19.5000       | 1801 CaCYB3     | C-compou oxidoreductase activity                                                                            |
| CA5264 | 2.4 | 1.9 |     | 0.9 | IPF1798    | complemer unknown function orf19.4998            | 1798 IPF1798    | Amino acid metabolism TRANSCRIPTION SUBCELLULAR LOCALISATION                                                |
| CA5265 | 0.5 | 1.2 | 0.3 | 1.0 | IPF1792    | 15885491..unknown function orf19.4997            | 1792 IPF1792    | C-compound and carbohydrate metabolism TRANSCRIPTION                                                        |
| CA5266 | 1.0 | 0.9 | 1.2 | 1.0 | IPF1787.3f | complemer unknown function, 3-pr orf19.4996      | 1789 IPF1787.3f | UNCLASSImolecular_function unknown                                                                          |
| CA5267 | 1.3 | 1.1 | 1.0 | 0.9 | IPF1787.5f | complemer unknown function, 5-pr orf19.4995      | 1787 IPF1787.5f | No significant S.c. match                                                                                   |
| CA5268 | 0.9 | 0.9 | 1.1 | 0.9 | SEC18.3F   | complemer vesicular fusion proteir orf19.4994    | 1786 CaSEC18.   | CELLULAFhydrolase activity                                                                                  |
| CA5270 | 1.6 | 0.9 | 1.1 | 0.9 | SEC18.5F   | complemer vesicular fusion proteir orf19.4993    | 1784 CaSEC18.   | CELLULAR TRANSPORT AND TRANSPORT MECHANISMS SUBCELLULAR LOCALISATION                                        |
| CA5271 | 1.2 | 1.1 | 1.0 | 1.0 | IPF1777    | complemer similar to Saccharomy orf19.4991       | 1777 IPF1777    | CELL CYC RNA binding                                                                                        |
| CA5272 | 1.8 | 0.9 | 0.9 | 0.8 | IPF1770    | complemer unknown function orf19.4988            | 1770 IPF1770    | No significant S.c. match                                                                                   |
| CA5273 | 0.8 | 1.1 | 1.1 | 1.0 | NUP49      | 15905616..nuclear pore protein (b orf19.4987     | 1766 CaNUP49    | TRANSCR structural molecule activity                                                                        |
| CA5274 | 1.3 | 1.0 | 1.0 | 0.8 | IPF1764    | complemer similar to Saccharomy orf19.4985       | 1764 IPF1764    | TRANSPO transporter activity                                                                                |
| CA5275 | 1.6 | 1.0 | 0.9 | 0.8 | IPF1760.3f | complemer unknown function, 3-pr orf19.12451     | 1760 IPF1760.3f | C-compound and carbohydrate metabolism                                                                      |
| CA5276 | 1.6 | 0.9 | 0.9 | 1.0 | IPF1759.5f | complemer unknown function, similar to endoch    | 1759 IPF1759.5f | No significant S.c. match                                                                                   |
| CA5277 | 0.5 | 0.9 |     | 1.1 | CTA29.EXI  | 15918562..Protein with putative tr orf19.7127    | 1892 CaCTA29.e  | No significant S.c. match                                                                                   |
| CA5278 | 0.3 | 0.6 | 0.7 | 1.0 | CTA29.EXI  | 15919539..Protein with putative transcription ac | 1893 CaCTA29.e  | No significant S.c. match                                                                                   |
| CA5279 | 1.0 | 0.8 | 0.9 | 1.2 | SYS1       | 15920247..Similar to ypt6 suppres orf19.7128     | 1895 CaSYS1     | CELLULAFmolecular_function unknown                                                                          |
| CA5280 | 1.1 | 1.1 | 1.2 | 1.1 | IPF1899    | 15921443..unknown function orf19.7131            | 1899 IPF1899    | UNCLASSImolecular_function unknown                                                                          |
| CA5281 | 1.6 | 0.9 | 1.0 | 1.0 | SPT6       | complemer Transcription elongatio orf19.7136     | 1910 CaSPT6     | CELL CYC transcription regulator activity                                                                   |
| CA5282 | 0.8 | 1.0 | 1.0 | 1.1 | IPF1911    | complemer unknown function orf19.7139            | 1911 IPF1911    | No significant S.c. match                                                                                   |
| CA5283 | 1.2 | 0.7 |     | 1.0 | IPF1912    | 15927356..putative catechol o-me orf19.7140      | 1912 IPF1912    | No significant S.c. match                                                                                   |
| CA5284 | 1.0 | 1.3 | 1.0 | 1.2 | UFE1       | 15928155..Endoplasmic reticulum orf19.7141       | 1914 CaUFE1     | CELLULAFtransporter activity                                                                                |
| CA5285 | 1.0 | 1.1 | 1.2 | 1.0 | HBS1.3f    | complemer Translation elongation orf19.7144      | 1918 CaHBS1.3f  | PROTEIN imolecular_function unknown                                                                         |
| CA5287 | 0.8 | 1.0 |     | 1.1 | IPF1922    | complemer similar to multidrug res orf19.7148    | 1922 IPF1922    | CELL RESCUE DEFENSE AND VIRULENCE ""TRANSPORT FACILITATION                                                  |
| CA5288 | 0.9 | 1.2 | 1.0 | 1.1 | IPF1928    | 15935369..unknown function orf19.7149            | 1928 IPF1928    | UNCLASSImolecular_function unknown                                                                          |
| CA5289 | 2.4 | 1.5 |     | 0.9 | NRG1       | complemer similar to transcription orf19.7150    | 1932 CaNRG1     | UNCLASSItranscription regulator activity                                                                    |
| CA5290 | 0.8 | 0.9 | 1.2 | 0.9 | IPF1943    | 15953097..similar to Aspergillus (f orf19.7152   | 1943 IPF1943    | Amino acid metabolism                                                                                       |
| CA5291 | 1.2 | 1.2 | 1.1 | 0.8 | LOS1       | 15954470..pre-tRNA splicing prote orf19.7153     | 1945 CaLOS1     | TRANSCR RNA binding,protein binding                                                                         |
| CA5292 | 1.1 | 1.1 | 1.2 | 1.1 | IPF1948    | 15957726..unknown function orf19.7154            | 1948 IPF1948    | UNCLASSImolecular_function unknown                                                                          |
| CA5293 | 1.0 | 1.0 | 1.2 | 0.9 | FAA24      | complemer Long-chain-fatty-acid- orf19.7156      | 1949 CaFAA24    | Lipid fatty-acid and isoprenoid metabolism ""CELLULAR TRANSPORT AND TRANSPORT MECHANISMS SUBCELLULAR LO     |
| CA5294 | 1.0 | 0.8 | 1.0 | 1.0 | IPF1952    | complemer unknown function orf19.7157            | 1952 IPF1952    | No significant S.c. match                                                                                   |
| CA5295 | 1.1 | 0.8 | 1.0 | 1.0 | IPF1954    | complemer putative transporter (b) orf19.7158    | 1954 IPF1954    | TRANSPORT FACILITATION                                                                                      |
| CA5296 | 1.4 | 1.0 | 1.2 | 0.9 | IPF1956    | complemer unknown function orf19.7159            | 1956 IPF1956    | UNCLASSImolecular_function unknown                                                                          |
| CA5297 | 1.1 | 1.0 | 0.9 | 0.8 | YAR1       | 15967930..Ankyrin repeat-contain orf19.7160      | 1957 CaYAR1     | CELL CYC molecular_function unknown                                                                         |
| CA5298 | 0.8 | 0.7 | 0.7 | 1.0 | SUI3       | 15968805.. Translation initiation fa orf19.7161  | 19809 CaSUI3    | PROTEIN itranslation regulator activity                                                                     |
| CA5299 | 1.3 | 1.0 | 1.0 | 0.8 | IPF2190    | complemer putative serine/threonin orf19.7164    | 2190 IPF2190    | CLASSIFICprotein kinase activity                                                                            |
| CA5300 | 1.0 | 0.9 | 1.1 | 1.0 | IPF2189    | 15971542..unknown function orf19.7165            | 2189 IPF2189    | No significant S.c. match                                                                                   |
| CA5301 | 1.1 | 1.0 | 1.0 | 0.9 | IPF2186    | 15973161..unknown function orf19.7166            | 2186 IPF2186    | UNCLASSIFIED PROTEINS                                                                                       |
| CA5302 | 0.8 | 1.0 | 1.0 | 1.0 | IPF20175   | 15975761..unknown function orf19.7167            | 20175 IPF20175  | No significant S.c. match                                                                                   |
| CA5303 | 0.7 | 0.7 |     | 1.0 | IPF2180    | 15977893..unknown function orf19.7170            | 2180 IPF2180    | No significant S.c. match                                                                                   |
| CA5304 | 0.9 | 0.9 | 1.0 | 1.0 | IPF2178    | complemer unknown function orf19.7173            | 2178 IPF2178    | No significant S.c. match                                                                                   |
| CA5305 | 1.4 | 1.1 | 1.2 | 0.8 | IPF2175    | complemer similar to Saccharomy orf19.7175       | 2175 IPF2175    | PROTEIN imolecular_function unknown                                                                         |
| CA5306 | 1.1 | 0.8 | 1.2 | 0.8 | NPT1       | 15981895..Nicotinate phosphoricb orf19.7176      | 2173 CaNPT1     | Metabolism transferase activity                                                                             |
| CA5307 | 1.1 | 1.2 | 0.8 | 1.2 | IPF2172    | 15983406..similar to Saccharomy orf19.7177       | 2172 IPF2172    | PROTEIN Istructural molecule activity                                                                       |
| CA5308 | 1.2 | 1.1 | 1.1 | 0.9 | PRE5       | 15986569..20S proteasome subur orf19.7178        | 2171 CaPRE5     | PROTEIN Ipeptidase activity                                                                                 |
| CA5309 | 1.1 | 1.2 | 1.1 | 1.0 | IPF2170    | complemer similar to saccharomy orf19.7179       | 2170 IPF2170    | PROTEIN FATE [folding modification destination] ""CELLULAR TRANSPORT AND TRANSPORT MECHANISMS ""CELL RES    |
| CA5310 | 0.8 | 1.1 | 1.2 | 0.9 | IPF2167    | complemer unknown function orf19.7181            | 2167 IPF2167    | PROTEIN FATE [folding modification destination] ""SUBCELLULAR LOCALISATION                                  |
| CA5311 | 0.9 | 1.1 | 1.0 | 1.2 | IPF2166    | 15991528..unknown function orf19.7182            | 2166 IPF2166    | UNCLASSImolecular_function unknown                                                                          |
| CA5312 | 1.0 | 1.1 | 1.0 | 0.9 | IPF2165    | complemer unknown function orf19.7183            | 2165 IPF2165    | UNCLASSImolecular_function unknown                                                                          |
| CA5313 | 0.6 | 1.0 | 1.2 | 1.1 | IPF2163    | 15993216..unknown function orf19.7184            | 2163 IPF2163    | UNCLASSIFIED PROTEINS                                                                                       |
| CA5314 | 1.4 | 0.9 | 1.0 | 0.9 | HAT2       | 15993846..Subunit of the major ye orf19.7185     | 2161 CaHAT2     | TRANSCRIPTION ""PROTEIN FATE [folding modification destination] ""SUBCELLULAR LOCALISATION                  |
| CA5315 | 0.9 | 0.9 | 1.2 | 1.1 | CYB2       | 15996981..B-type cyclin orf19.7186               | 2159 CaCYB2     | CELL CYC protein kinase activity,enzyme regulator activity                                                  |
| CA5316 | 1.3 | 1.2 | 1.0 | 0.9 | MAM33      | 15998865..Mitochondrial acidic m orf19.7187      | 2157 CaMAM33    | SUBCELLULImolecular_function unknown                                                                        |
| CA5317 | 0.2 | 0.4 | 0.6 | 1.2 | RPP1B      | 16000013..Acidic ribosomal protei orf19.7188     | 2156 CaRPP1B    | PROTEIN SYNTHESIS SUBCELLULAR LOCALISATION                                                                  |
| CA5318 | 0.7 | 0.9 | 1.2 | 1.1 | OGG1       | complemer 8-oxoguanine DNA gly orf19.7190        | 2154 CaOGG1     | CELL CYC DNA binding                                                                                        |
| CA5319 | 1.6 | 1.2 | 1.1 | 0.9 | IPF2150    | 16002602..similar to protein involv orf19.7193   | 2150 IPF2150    | Amino acid molecular_function unknown                                                                       |
| CA5320 | 1.3 | 0.8 | 1.2 | 1.1 | IPF2147    | 16004783..unknown function orf19.7194            | 2147 IPF2147    | No significant S.c. match                                                                                   |
| CA5321 | 1.3 | 0.9 | 0.9 | 0.8 | RAD6.3     | complemer Ubiquitin protein ligase orf19.7195    | 2145 CaRAD6.3   | CELL CYCLE AND DNA PROCESSING TRANSCRIPTION ""PROTEIN FATE [folding modification destination] ""CELL FATE S |
| CA5322 | 4.4 | 3.6 | 2.8 | 2.2 | PRB1       | complemer Protease B, vacuolar (l orf19.7196     | 2144 CaPRB1     | PROTEIN Ipeptidase activity                                                                                 |

|        |     |     |     |     |           |                                              |            |       |           |                                                                                              |
|--------|-----|-----|-----|-----|-----------|----------------------------------------------|------------|-------|-----------|----------------------------------------------------------------------------------------------|
| CA5323 | 1.1 | 1.1 | 1.4 | 0.9 | IPF2142   | complemer unknown function                   | orf19.7197 | 2142  | IPF2142   | PROTEIN I protein binding                                                                    |
| CA5324 | 1.0 | 0.8 | 0.9 | 0.8 | IPF2140   | complemer unknown function                   | orf19.7198 | 2140  | IPF2140   | UNCLASSI molecular_function unknown                                                          |
| CA5325 | 1.6 | 1.1 | 1.0 | 0.9 | IPF2138   | 16013645..unknown function                   | orf19.7199 | 2138  | IPF2138   | UNCLASSI molecular_function unknown                                                          |
| CA5326 | 1.1 | 1.7 | 1.1 | 1.3 | IPF2137   | 16014422..unknown function                   | orf19.7200 | 2137  | IPF2137   | No significant S.c. match                                                                    |
| CA5327 | 1.7 | 1.4 | 1.1 | 1.0 | SLA2      | complemer Cytoskeleton assembly              | orf19.7201 | 2136  | CaSLA2    | Nucleotide structural molecule activity                                                      |
| CA5328 | 0.8 | 1.1 | 0.9 | 1.2 | RER1      | complemer Required for correct lo            | orf19.7202 | 2132  | CaRER1    | PROTEIN I molecular_function unknown                                                         |
| CA5329 | 1.3 | 1.0 | 1.0 | 0.9 | MRP7      | complemer Mitochondrial ribosom:             | orf19.7203 | 2131  | CaMRP7    | PROTEIN I structural molecule activity                                                       |
| CA5330 | 0.8 | 1.0 | 1.1 | 1.1 | IPF2130   | 16022187..similar to 2-nitropropa            | orf19.7204 | 2130  | IPF2130   | Nitrogen a structural_function unknown                                                       |
| CA5331 | 1.0 | 1.1 | 1.0 | 1.1 | DUR33     | complemer Urea transport protein             | orf19.7205 | 901   | CaDUR33   | REGULATION OF/INTERACTION WITH CELLULAR ENVIRONMENT SUBCELLULAR LOCALISATION TRANSPORT FACIL |
| CA5332 | 0.9 | 1.0 | 1.0 | 1.0 | IPF900.3  | 16026752..unknown function, , 3-             | orf19.7206 | 900   | IPF900.3  | UNCLASSI molecular_function unknown                                                          |
| CA5333 | 1.1 | 1.1 | 1.0 | 1.1 | DOA4      | complemer ubiquitin-specific isope           | orf19.7207 | 899   | CaDOA4    | PROTEIN I peptidase activity                                                                 |
| CA5334 | 1.0 | 1.0 | 0.9 | 1.0 | SMK1      | 16031171..MAP kinase (by homol               | orf19.7208 | 895   | CaSMK1    | CELLULAF protein kinase activity,signal transducer activity                                  |
| CA5335 | 0.8 | 1.1 | 1.0 | 1.0 | IPF894    | 16032418..unknown function                   | orf19.7209 | 894   | IPF894    | CELL FATE SUBCELLULAR LOCALISATION PROTEIN ACTIVITY REGULATION                               |
| CA5336 | 1.0 | 1.0 | 0.9 | 0.9 | IPF893    | 16033135..unknown function                   | orf19.7210 | 893   | IPF893    | UNCLASSI molecular_function unknown                                                          |
| CA5337 | 1.0 | 1.0 | 1.1 | 1.0 | APL1      | 16034302..AP-2 complex subunit,              | orf19.7212 | 891   | CaAPL1    | PROTEIN I molecular_function unknown                                                         |
| CA5338 | 1.2 | 1.1 | 1.0 | 0.9 | IPF889    | complemer ATP-dependent RNA t                | orf19.7213 | 889   | IPF889    | CLASSIFIC helicase activity                                                                  |
| CA5339 | 0.8 | 1.1 | 1.1 | 1.2 | IPF885    | 16040381..glucan 1,3-beta-glucos             | orf19.7214 | 885   | IPF885    | C-compour molecular_function unknown                                                         |
| CA5340 | 1.6 | 1.2 | 1.2 | 0.9 | IPF883    | 16042494..unknown function                   | orf19.7215 | 883   | IPF883    | UNCLASSI RNA binding                                                                         |
| CA5341 | 0.3 | 1.1 | 0.9 | 0.9 | HSP10.3   | 16048241..10 kDa mitochondrial heat shock ch |            | 878   | CaHSP10.3 | PROTEIN I chaperone activity                                                                 |
| CA5342 | 0.5 | 1.0 | 1.0 | 1.2 | YPT521    | 16048974..GTP-binding protein of             | orf19.7216 | 877   | CaYPT521  | PROTEIN I hydrolase activity                                                                 |
| CA5343 | 0.5 | 0.3 | 0.6 | 0.8 | RPL4B     | complemer Ribosomal protein L4B              | orf19.7217 | 875   | CaRPL4B   | PROTEIN I structural molecule activity                                                       |
| CA5344 | 0.8 | 0.7 | 1.0 | 1.0 | PRY2      | complemer putative pathogen rel              | orf19.7218 | 872   | CaPRY2    | CELL FATI molecular_function unknown                                                         |
| CA5345 | 0.6 | 0.3 | 0.2 | 0.8 | FTR1      | 16056888..high affinity iron perme           | orf19.7219 | 868   | CaFTR1    | REGULATI transporter activity                                                                |
| CA5346 | 1.2 | 0.8 |     | 1.1 | IPF867    | complemer unknown function                   | orf19.7221 | 867   | IPF867    | UNCLASSI hydrolase activity                                                                  |
| CA5347 | 1.2 | 0.9 | 1.0 | 1.1 | IPF864    | complemer unknown function                   | orf19.7222 | 864   | IPF864    | UNCLASSI molecular_function unknown                                                          |
| CA5348 | 0.8 | 1.1 |     | 0.8 | IPF863    | 16064221..involved in inositol bios          | orf19.7223 | 863   | IPF863    | C-compour molecular_function unknown                                                         |
| CA5349 | 0.7 | 1.2 | 1.0 | 1.0 | IPF861    | 16066337..unknown function                   | orf19.7224 | 861   | IPF861    | UNCLASSI molecular_function unknown                                                          |
| CA5350 | 0.8 | 1.1 |     | 1.2 | IPF859    | 16068549..unknown function                   | orf19.7225 | 859   | IPF859    | No significant S.c. match                                                                    |
| CA5351 | 1.1 | 1.1 | 1.2 | 1.1 | IPF857    | complemer unknown function                   | orf19.7227 | 857   | IPF857    | UNCLASSI molecular_function unknown                                                          |
| CA5352 | 0.5 | 1.0 | 0.9 | 1.0 | IPF856    | 16070891..unknown function                   | orf19.7228 | 856   | IPF856    | UNCLASSI molecular_function unknown                                                          |
| CA5353 | 1.0 | 0.9 | 1.2 | 1.1 | IML2      | complemer unknown function                   | orf19.7229 | 855   | CaIML2    | UNCLASSI molecular_function unknown                                                          |
| CA5354 | 1.0 | 0.2 | 0.5 | 1.1 | FTR2      | complemer high affinity iron perme           | orf19.7231 | 853   | CaFTR2    | REGULATION OF/INTERACTION WITH CELLULAR ENVIRONMENT SUBCELLULAR LOCALISATION TRANSPORT FACIL |
| CA5355 | 1.0 | 0.9 | 1.0 | 1.0 | IRR1.3f   | complemer cohesin complex subu               | orf19.7232 | 850   | CaIRR1.3f | CELL CYCLE AND DNA PROCESSING SUBCELLULAR LOCALISATION                                       |
| CA5356 | 0.9 | 0.7 | 0.8 | 1.0 | IRR1.5f   | complemer cohesin complex subu               | orf19.7233 | 849   | CaIRR1.5f | CELL CYC protein binding                                                                     |
| CA5357 | 0.9 | 0.9 | 0.9 | 1.0 | RSC8      | 16082295..chromatin remodeling               | orf19.7234 | 848   | CaRSC8    | CELL CYC molecular_function unknown                                                          |
| CA5358 | 1.5 | 1.0 |     | 1.0 | IPF846    | complemer WD-repeat protein, bet             | orf19.7235 | 846   | IPF846    | UNCLASSI molecular_function unknown                                                          |
| CA5359 | 0.6 | 1.1 | 1.2 | 0.9 | TIF35     | complemer translation initiation fac         | orf19.7236 | 842   | CaTIF35   | PROTEIN I translation regulator activity                                                     |
| CA5360 | 1.0 | 1.0 | 1.1 | 1.0 | IPF839    | 16088591..unknown function                   | orf19.7237 | 839   | IPF839    | UNCLASSI molecular_function unknown                                                          |
| CA5361 | 1.2 | 1.2 | 1.0 | 1.1 | NPL3      | complemer nucleolar shuttling prot           | orf19.7238 | 837   | CaNPL3    | TRANSCR RNA binding                                                                          |
| CA5362 | 0.9 | 0.8 |     | 1.1 | IPF836.3  | complemer regulation of G-protein            | orf19.7239 | 836   | IPF836.3  | CELLULAF DNA binding                                                                         |
| CA5363 | 1.9 | 1.3 | 1.1 | 1.1 | NCR1      | complemer Polytopic membrane p               | orf19.7242 | 829   | CaNCR1    | Lipid fatty-ε molecular_function unknown                                                     |
| CA5364 | 0.9 | 0.8 | 0.8 | 0.9 | DCD1      | 16098318..deoxycytidylylate deam             | orf19.7243 | 825   | CaDCD1    | Nucleotide hydrolase activity                                                                |
| CA5365 | 0.8 | 0.9 |     | 0.9 | IPF824    | complemer 2-hydroxyhepta-2,4-die             | orf19.7244 | 824   | IPF824    | UNCLASSI molecular_function unknown                                                          |
| CA5366 | 1.0 | 1.0 | 1.0 | 1.1 | IPF823    | 16100311..tRNA (5-methylaminon               | orf19.7245 | 823   | IPF823    | UNCLASSI transferase activity                                                                |
| CA5367 | 1.5 | 0.9 | 2.9 | 0.8 | RIM101    | complemer Zn finger transcription            | orf19.7247 | 822   | CaRIM101  | CELL CYC transcription regulator activity                                                    |
| CA5368 | 1.5 | 1.0 | 0.9 | 1.0 | IPF5257   | 16105366..unknown function                   | orf19.7250 | 5257  | IPF5257   | UNCLASSIFIED PROTEINS                                                                        |
| CA5369 | 1.0 | 1.1 | 0.9 | 0.9 | WSC4      | complemer Cell wall integrity by hc          | orf19.7251 | 5256  | CaWSC4    | CELL RES signal transducer activity                                                          |
| CA5370 | 1.5 | 1.0 | 0.9 | 0.9 | IPF5248   | complemer unknown function                   | orf19.7254 | 5248  | IPF5248   | UNCLASSI molecular_function unknown                                                          |
| CA5371 | 0.9 | 1.0 | 1.1 | 1.2 | RPC10     | 16110659..DNA-directed RNA pol               | orf19.7255 | 5246  | CaRPC10   | No signific nucleotidyltransferase activity                                                  |
| CA5372 | 1.0 | 1.1 | 1.0 | 1.1 | MLH3      | complemer DNA mismatch repair t              | orf19.7257 | 5245  | CaMLH3    | CELL CYC molecular_function unknown                                                          |
| CA5373 | 1.1 | 1.0 | 0.9 | 0.8 | IPF5243   | 16112726..snRNP (by homology)                | orf19.7256 | 5243  | IPF5243   | TRANSCR RNA binding                                                                          |
| CA5374 | 0.5 | 1.0 | 1.0 | 0.9 | DDI1      | 16113118..Response to DNA alky               | orf19.7258 | 5241  | CaDDI1    | CELL RES protein binding                                                                     |
| CA5375 | 0.9 | 0.8 | 1.2 | 1.2 | IPF5239   | complemer similarity to aldose red           | orf19.7260 | 5239  | IPF5239   | C-compound and carbohydrate metabolism                                                       |
| CA5376 | 0.9 | 0.7 | 1.1 | 1.0 | GDI1      | complemer GDP dissociation inhib             | orf19.7261 | 5237  | CaGDI1    | CELLULAF enzyme regulator activity                                                           |
| CA5377 | 1.1 | 1.0 | 1.2 | 0.9 | IPF5234   | complemer X-Pro dipeptidase (by              | orf19.7263 | 5234  | IPF5234   | PROTEIN I peptidase activity                                                                 |
| CA5378 | 0.9 | 1.0 | 1.1 | 0.9 | MPR1      | 16117776..26S proteasome regul               | orf19.7264 | 5231  | CaMPR1    | PROTEIN I peptidase activity                                                                 |
| CA5379 | 1.5 | 1.0 | 1.1 | 0.8 | IPF5228.5 | 16118769..similar to Saccharomy              | orf19.7265 | 5228  | IPF5228.5 | TRANSCR RNA binding                                                                          |
| CA5380 | 0.9 | 1.1 | 1.0 | 1.0 | IPF5224   | complemer unknown function                   | orf19.7267 | 5224  | IPF5224   | No significant S.c. match                                                                    |
| CA5381 | 0.9 | 0.8 | 1.2 | 1.1 | IPF5222   | complemer arylalkylamine n-acetyl            | orf19.7269 | 5222  | IPF5222   | UNCLASSI molecular_function unknown                                                          |
| CA5382 | 1.2 | 1.3 | 1.3 | 1.0 | IPF5217   | 16122809..unknown function                   | orf19.7270 | 5217  | IPF5217   | No significant S.c. match                                                                    |
| CA5383 | 1.2 | 1.2 | 1.0 | 0.9 | ZORRO1B   | complemer reverse transcriptase, :           | orf19.7273 | 14000 | CaZorro1b | No significant S.c. match                                                                    |
| CA5384 | 0.7 | 1.0 |     | 1.0 | ZORRO1B   | complemer reverse transcriptase, :           | orf19.7274 | 14001 | CaZorro1b | No significant S.c. match                                                                    |
| CA5385 | 0.7 | 1.2 | 1.2 | 1.0 | ZORRO2B   | complemer reverse transcriptase, :           | orf19.7275 | 14003 | CaZorro2b | No significant S.c. match                                                                    |
| CA5386 | 0.6 | 1.2 | 1.2 | 1.2 | ZORRO2B   | complemer Putative gag protein, 5            | orf19.7277 | 14005 | CaZorro2b | No significant S.c. match                                                                    |
| CA5387 | 1.0 | 0.9 | 0.8 | 0.9 | CTA24.3   | complemer transcriptional activator, 3-prime | orf19.7278 | 14006 | CaCTA24.3 | No significant S.c. match                                                                    |
| CA5388 | 0.4 | 0.8 | 0.6 | 2.1 | PET9      | complemer ADP/ATP carrier prote              | orf19.8545 | 6536  | CaPET9    | Nucleotide transporter activity                                                              |
| CA5389 | 0.9 | 1.2 | 1.0 | 0.9 | IFA13     | complemer unknown function                   | orf19.931  | 6533  | CaIFA13   | C-compound and carbohydrate metabolism TRANSCRIPTION SUBCELLULAR LOCALISATION                |
| CA5390 |     |     |     |     | DRS24     | complement(16139225..16144375)               |            |       |           |                                                                                              |
| CA5391 | 0.4 | 1.1 | 1.0 | 1.0 | IPF18109  | 16147634..unknown function                   | orf19.934  | 18109 | IPF18109  | No significant S.c. match                                                                    |
| CA5392 | 2.1 | 1.2 | 1.1 | 1.3 | IPF10571  | 16158605..Unknown function                   | orf19.935  | 10571 | IPF10571  | No significant S.c. match                                                                    |
| CA5393 | 0.8 | 0.9 | 0.9 | 1.0 | IPF9398   | complemer unknown function                   | orf19.936  | 9398  | IPF9398   | No significant S.c. match                                                                    |

|        |     |     |     |     |            |                                               |            |       |            |                                                                                                         |
|--------|-----|-----|-----|-----|------------|-----------------------------------------------|------------|-------|------------|---------------------------------------------------------------------------------------------------------|
| CA5394 | 0.8 | 1.0 | 0.9 | 1.1 | IPF9400    | complemer unknown function                    | orf19.937  | 9400  | IPF9400    | UNCLASSIFIED PROTEINS                                                                                   |
| CA5395 | 1.4 | 0.9 | 1.0 | 0.9 | IPF9401    | complemer unknown function                    | orf19.938  | 9401  | IPF9401    | No significant S.c. match                                                                               |
| CA5396 | 1.2 | 0.9 | 1.1 | 0.9 | NAM7       | complemer nonsense-mediated ml                | orf19.939  | 9662  | CaNAM7     | Nucleotide helicase activity                                                                            |
| CA5397 | 1.3 | 1.1 | 1.0 | 0.9 | IPF9663    | 16175902..similar to Saccharomy               | orf19.940  | 9663  | IPF9663    | CELL FAT1 signal transducer activity                                                                    |
| CA5398 | 0.9 | 0.9 | 0.8 | 1.1 | SEC14      | 16181246..phosphatidylinositol(P              | orf19.941  | 9666  | CaSEC14    | Lipid fatty-ε transporter activity                                                                      |
| CA5399 | 1.2 | 0.9 | 0.8 | 0.9 | KRE62.5F   | 16183259..Glucan synthase subu                | orf19.942  | 1538  | CaKRE62.5  | C-compound and carbohydrate metabolism                                                                  |
| CA5400 | 0.8 | 0.9 | 1.1 | 1.1 | KRE62.3F   | 16185108..Glucan synthase subunit, 3-prime    | orf19.943  | 1539  | CaKRE62.3  | No significant S.c. match                                                                               |
| CA5401 | 1.1 | 0.9 | 1.1 | 0.9 | FET35.3    | 16185517..Cell surface ferroxidas             | orf19.943  | 1540  | CaFET35.3  | CELLULAR TRANSPORT AND TRANSPORT MECHANISMS REGULATION OF/INTERACTION WITH CELLULAR ENVIRON             |
| CA5402 | 1.3 | 1.0 | 1.0 | 1.0 | IFG3.3     | 16188612..probable d-amino acid               | orf19.944  | 1541  | CaIFG3.3   | No significant S.c. match                                                                               |
| CA5403 | 0.9 | 1.0 | 1.1 | 1.1 | IPF1542    | 16189271..unknown function                    | orf19.945  | 1542  | IPF1542    | PROTEIN I protein binding                                                                               |
| CA5404 | 1.1 | 0.9 | 1.2 | 1.1 | MET14      | complemer Adenylylsulfate kinase              | orf19.946  | 1543  | CaMET14    | Amino acid transferase activity                                                                         |
| CA5405 | 0.8 | 1.0 | 0.9 | 1.0 | MRP17      | 16191360..Mitochondrial ribosom               | orf19.947  | 1544  | CaMRP17    | PROTEIN I structural molecule activity                                                                  |
| CA5406 | 1.2 | 1.1 | 0.9 | 0.9 | IPF1547    | 16193043..unknown function                    | orf19.949  | 1547  | IPF1547    | PROTEIN FATE [folding modification destination] ""CELLULAR TRANSPORT AND TRANSPORT MECHANISMS CONTROL C |
| CA5407 | 0.8 | 1.0 | 1.1 | 1.1 | IPF1548    | 16197395..unknown function                    | orf19.951  | 1548  | IPF1548    | No significant S.c. match                                                                               |
| CA5408 | 1.0 | 0.9 | 1.1 | 0.8 | IPF1551    | complemer unknown function                    | orf19.952  | 1551  | IPF1551    | No significant S.c. match                                                                               |
| CA5409 | 0.2 | 0.5 | 0.7 | 0.9 | COF1       | complemer cofilin (by homology)               |            | 1554  | CaCOF1     | PROTEIN I protein binding                                                                               |
| CA5410 | 1.1 | 1.0 | 0.8 | 1.2 | IPF1557    | 16203444..similar to dnaJ proteins            | orf19.954  | 1557  | IPF1557    | PROTEIN FATE [folding modification destination]                                                         |
| CA5411 | 1.1 | 1.0 | 1.1 | 1.1 | IPF1558    | complemer unknown function                    | orf19.955  | 1558  | IPF1558    | No significant S.c. match                                                                               |
| CA5412 | 1.3 | 1.2 | 1.0 | 1.3 | IPF1566    | 16206178..unknown function                    | orf19.956  | 1566  | IPF1566    | UNCLASSI molecular_function unknown                                                                     |
| CA5413 | 0.9 | 0.9 | 1.2 | 1.0 | IPF1567    | complemer mitochondrial ribosomal protein L34 |            | 1567  | IPF1567    | PROTEIN I structural molecule activity                                                                  |
| CA5414 | 0.8 | 1.1 | 0.9 | 1.1 | IPF1568    | 16215716..unknown function                    | orf19.962  | 1568  | IPF1568    | TRANSCR nucleotidyltransferase activity                                                                 |
| CA5415 | 1.2 | 0.9 | 1.0 | 0.9 | SMC4       | 16216486..Stable Maintenance of               | orf19.964  | 1574  | CaSMC4     | CONTROL hydrolase activity                                                                              |
| CA5416 | 0.9 | 1.3 | 1.0 | 1.2 | IPF1576    | complemer unknown function                    | orf19.966  | 1576  | IPF1576    | UNCLASSIFIED PROTEINS                                                                                   |
| CA5417 | 1.3 | 1.0 | 1.1 | 0.8 | NUC1       | 16222130..Nuclease, mitochondri               | orf19.967  | 1578  | CaNUC1     | Nucleotide RNA binding                                                                                  |
| CA5418 | 1.1 | 1.8 | 1.4 | 1.0 | IPF1580    | complemer unknown function                    | orf19.968  | 1580  | IPF1580    | UNCLASSI molecular_function unknown                                                                     |
| CA5419 | 2.3 | 1.2 | 1.5 | 0.9 | PRS1       | complemer Ribose-phosphate pyr                | orf19.969  | 1582  | CaPRS1     | Amino acid transferase activity                                                                         |
| CA5420 | 1.2 | 1.1 | 1.2 | 0.7 | IPF1583    | 16226306..unknown function                    | orf19.970  | 1583  | IPF1583    | UNCLASSI molecular_function unknown                                                                     |
| CA5421 | 1.2 | 1.0 | 1.0 | 0.8 | SKN7       | complemer Transcription factor (by            | orf19.971  | 1586  | CaSKN7     | CELL CYC signal transducer activity,transcription regulator activity,DNA binding                        |
| CA5422 | 1.3 | 0.9 | 1.0 | 0.9 | IPF1588    | 16229370..unknown function                    | orf19.972  | 1588  | IPF1588    | UNCLASSI molecular_function unknown                                                                     |
| CA5423 | 0.7 | 1.1 | 0.9 | 1.1 | ROT2       | complemer Glucosidase II, cataly              | orf19.974  | 1591  | CaROT2     | C-compour hydrolase activity                                                                            |
| CA5424 | 0.9 | 1.5 | 1.1 | 1.1 | IPF1598    | 16233612..unknown function                    | orf19.976  | 1598  | IPF1598    | UNCLASSI ligase activity                                                                                |
| CA5425 | 1.6 | 1.1 | 1.1 | 1.0 | BDF1       | 16236647..sporulation protein (by             | orf19.978  | 1604  | CaBDF1     | TRANSCR transcription regulator activity                                                                |
| CA5426 | 1.0 | 0.4 | 1.1 | 0.9 | FAS1       | 16239835..Fatty-acyl-CoA syntha               | orf19.979  | 1611  | CaFAS1     | Lipid fatty-lyase activity                                                                              |
| CA5427 |     |     |     |     | IPF1615.3f | complement(16245992..16248238)                |            |       |            |                                                                                                         |
| CA5428 | 1.2 | 1.3 | 0.9 | 1.2 | BOI2       | 16251930..budding protein (by ho              | orf19.3230 | 179   | CaBOI2     | CELL FATE                                                                                               |
| CA5429 | 1.0 | 0.8 | 0.9 | 1.1 | CDC27      | 16256263..subunit of anaphase-p               | orf19.3231 | 185   | CaCDC27    | CELL CYC protein binding                                                                                |
| CA5430 | 1.1 | 0.8 | 1.1 | 1.0 | IPF191     | complemer putative permease (by               | orf19.3232 | 191   | IPF191     | TRANSPORT FACILITATION                                                                                  |
| CA5431 | 0.8 | 1.0 | 0.8 | 1.0 | IPF195     | 16266757..unknown function                    | orf19.3233 | 195   | IPF195     | CELLLULAF protein binding                                                                               |
| CA5432 | 1.0 | 1.0 | 1.2 | 0.9 | EBP5       | complemer NADPH dehydrogenas                  | orf19.3234 | 197   | CaEBP5     | ENERGY transporter activity                                                                             |
| CA5433 | 1.5 | 0.9 | 0.9 | 0.8 | SFT1       | 16270617..SNARE-like protein (by              | orf19.3235 | 198   | CaSFT1     | CELLLULAF transporter activity                                                                          |
| CA5434 | 0.8 | 1.0 | 0.9 | 1.0 | IPF199     | complemer F-actin capping protein             | orf19.3235 | 199   | IPF199     | CELL FAT1 protein binding                                                                               |
| CA5435 | 2.3 | 1.1 | 1.1 | 1.0 | UFD4       | complemer ubiquitin fusio                     | orf19.3237 | 204   | CaUFD4     | PROTEIN I ligase activity                                                                               |
| CA5436 | 0.7 | 1.0 | 1.0 | 0.9 | CTF18      | 16284780..chromosome transm                   | orf19.3239 | 217   | CaCTF18    | CELL CYC molecular_function unknown                                                                     |
| CA5437 | 0.8 | 0.8 | 0.8 | 0.8 | ERG27      | 16287570..3-keto sterol reductase             | orf19.3240 | 218   | CaERG27    | Lipid fatty-ε oxidoreductase activity                                                                   |
| CA5438 | 0.7 | 1.1 | 1.0 | 1.2 | IPF223     | complemer unknown function                    | orf19.3241 | 223   | IPF223     | UNCLASSI molecular_function unknown                                                                     |
| CA5439 | 0.8 | 1.2 | 0.9 | 0.9 | TAF25      | 16293173..transcription initiation f          | orf19.3242 | 224   | CaTAF25    | TRANSCR transcription regulator activity                                                                |
| CA5440 | 1.2 | 1.0 | 0.9 | 1.2 | SRP54      | complemer 54 kD signal recognitio             | orf19.3243 | 225   | CaSRP54    | PROTEIN FATE [folding modification destination] ""SUBCELLULAR LOCALISATION                              |
| CA5441 | 0.8 | 1.1 | 0.9 | 1.0 | IPF227     | 16295956..unknown function                    | orf19.3244 | 227   | IPF227     | UNCLASSI molecular_function unknown                                                                     |
| CA5442 | 1.2 | 1.3 | 1.3 | 1.3 | IPF18105.3 | complemer unknown function, 3-pr              | orf19.3245 | 228   | IPF18105.3 | No significant S.c. match                                                                               |
| CA5443 | 1.3 | 1.1 | 1.2 | 1.2 | IPF18105.5 | complemer unknown function, 3-pr              | orf19.3246 | 18105 | IPF18105.5 | No significant S.c. match                                                                               |
| CA5444 | 1.2 | 1.0 | 0.9 | 1.2 | IPF230     | complemer unknown function                    | orf19.3247 | 230   | IPF230     | UNCLASSI molecular_function unknown                                                                     |
| CA5445 | 0.8 | 1.0 | 0.9 | 1.1 | IPF232     | complemer unknown function                    | orf19.3248 | 232   | IPF232     | UNCLASSIFIED PROTEINS                                                                                   |
| CA5446 | 1.2 | 1.0 | 1.1 | 0.8 | LAG1       | complemer longevity-assurance pr              | orf19.3249 | 233   | CaLAG1     | Lipid fatty-ε transporter activity                                                                      |
| CA5447 | 0.8 | 1.0 | 1.0 | 0.9 | IPF234     | 16309970..similar to Saccharomy               | orf19.3250 | 234   | IPF234     | TRANSCR RNA binding                                                                                     |
| CA5448 | 0.8 | 1.0 | 0.9 | 0.9 | ARC19.EX   | 16312095..subunit of the Arp2/3 c             | orf19.3251 | 235   | CaARC19.5  | CELLLULAF structural molecule activity                                                                  |
| CA5449 | 0.9 | 0.8 | 0.9 | 1.0 | DAL81      | complemer Transcriptional activat             | orf19.3252 | 236   | CaDAL81    | Amino acid transcription regulator activity                                                             |
| CA5450 | 0.9 | 1.0 | 1.2 | 1.0 | IPF243     | 16316783..unknown function                    | orf19.3254 | 243   | IPF243     | No significant S.c. match                                                                               |
| CA5451 | 1.5 | 1.2 | 0.9 | 0.7 | SLN1       | 16321174..Two-component signal                | orf19.3256 | 250   | CaSLN1     | C-compour signal transducer activity,protein kinase activity                                            |
| CA5452 | 1.0 | 1.1 | 1.0 | 1.2 | SEC11      | complemer signal peptidase subur              | orf19.3259 | 252   | CaSEC11    | PROTEIN I peptidase activity                                                                            |
| CA5453 | 1.2 | 1.0 | 1.2 | 0.9 | IPF256     | 16328198..control of gene expres              | orf19.3260 | 256   | IPF256     | CELL RES lyase activity                                                                                 |
| CA5454 | 0.8 | 0.9 | 0.8 | 1.1 | IPF257.3   | complemer member of the FRP fa                | orf19.3261 | 257   | IPF257.3   | C-compound and carbohydrate metabolism                                                                  |
| CA5455 | 1.4 | 1.6 | 1.7 | 1.2 | IPF263.3   | complemer member of the FRP fa                | orf19.3263 | 263   | IPF263.3   | C-compound and carbohydrate metabolism                                                                  |
| CA5456 | 0.8 | 1.0 | 1.2 | 1.0 | IPF267     | complemer unknown function                    | orf19.3264 | 267   | IPF267     | CELL CYCLE AND DNA PROCESSING SUBCELLULAR LOCALISATION                                                  |
| CA5457 | 1.4 | 1.1 | 0.9 | 0.9 | TRM1       | complemer N2,N2-dimethylguanin                | orf19.3265 | 272   | CaTRM1     | TRANSCR transferase activity                                                                            |
| CA5458 | 1.0 | 1.0 | 1.4 | 1.1 | IPF274     | complemer unknown function                    | orf19.3266 | 274   | IPF274     | No significant S.c. match                                                                               |
| CA5459 | 0.7 | 1.0 | 0.9 | 1.0 | IPF276     | 16347302..unknown function                    | orf19.3267 | 276   | IPF276     | UNCLASSI molecular_function unknown                                                                     |
| CA5460 | 0.3 | 0.4 | 0.4 | 0.9 | IPF277     | 16348709..human IgE-dependent                 | orf19.3268 | 277   | IPF277     | PROTEIN I molecular_function unknown                                                                    |
| CA5461 | 1.3 | 1.1 | 1.1 | 0.8 | GSL23.5F   | 16350075..1,3-beta-D-glucan synt              | orf19.3269 | 279   | CaGSL23.5  | C-compound and carbohydrate metabolism                                                                  |
| CA5462 | 1.3 | 0.9 | 1.0 | 0.9 | GSL23.3F   | 16352359..1,3-beta-D-glucan synt              | orf19.3270 | 282   | CaGSL23.3  | C-compound and carbohydrate metabolism                                                                  |
| CA5463 | 1.2 | 1.0 | 1.0 | 1.3 | IPF284     | complemer unknown function                    | orf19.3272 | 284   | IPF284     | CELL RESCUE DEFENSE AND VIRULENCE ""CELL FATE                                                           |
| CA5464 | 0.9 | 0.9 | 1.0 | 1.0 | IPF285.5F  | 16356515..unknown function, 5-pr              | orf19.3273 | 285   | IPF285.5F  | UNCLASSI molecular_function unknown                                                                     |

|        |     |     |     |     |            |                                                         |                 |                                                                               |
|--------|-----|-----|-----|-----|------------|---------------------------------------------------------|-----------------|-------------------------------------------------------------------------------|
| CA5465 | 0.9 | 1.0 | 0.9 | 0.9 | IPF285.3F  | 16357131..unknown function, 3-pr orf19.3274             | 286 IPF285.3f   | UNCLASSIFIED PROTEINS                                                         |
| CA5466 | 1.3 | 1.2 | 1.1 | 1.2 | PWP2       | 16358168..periodic tryptophan prc orf19.3276            | 290 CaPWP2      | CELL CYC RNA binding                                                          |
| CA5467 | 2.5 | 1.3 | 1.5 | 0.9 | GSY1       | 16362931..UDP glucose--starch g orf19.3278              | 294 CaGSY1      | C-compou transferase activity                                                 |
| CA5468 | 1.5 | 1.1 | 0.9 | 0.9 | IFF7       | 16365701..unknown function orf19.3279                   | 296 CaIFF7      | UNCLASSIFIED PROTEINS                                                         |
| CA5469 | 1.2 | 1.0 | 0.9 | 0.8 | IPF298     | 16369927..unknown function orf19.3281                   | 298 IPF298      | UNCLASSIMolecular_function unknown                                            |
| CA5470 | 1.0 | 1.0 | 0.9 | 1.0 | IPF300     | 16372420..unknown function orf19.3282                   | 300 IPF300      | UNCLASSIFIED PROTEINS                                                         |
| CA5471 | 0.8 | 1.2 | 1.1 | 1.2 | IPF302     | 16374836..short chain dehydrogei orf19.3283             | 302 IPF302      | Lipid fatty-oxidoreductase activity                                           |
| CA5472 | 0.9 | 1.1 | 1.3 | 1.1 | IPF16948   | complemer unknown function orf19.3285                   | 16948 IPF16948  | UNCLASSIFIED PROTEINS                                                         |
| CA5473 | 0.7 | 1.2 | 1.2 | 1.0 | IPF16947   | 16377090..unknown function orf19.3286                   | 16947 IPF16947  | UNCLASSIMolecular_function unknown                                            |
| CA5474 | 1.3 | 1.0 | 1.1 | 1.1 | IPF16944.  | complemer unknown function, 3-pr orf19.3287             | 16944 IPF16944. | UNCLASSIMolecular_function unknown                                            |
| CA5475 | 0.9 | 0.5 |     | 1.1 | IPF8532    | 16385207..unknown function orf19.5303                   | 8532 IPF8532    | No significant S.c. match                                                     |
| CA5476 | 0.9 | 1.0 | 0.6 | 1.0 | IPF8527    | 16388810..unknown function orf19.5305                   | 8527 IPF8527    | No significant S.c. match                                                     |
| CA5477 | 0.8 | 1.0 | 0.8 | 1.1 | IPF18101   | complemer unknown function orf19.12766                  | 18101 IPF18101  | No significant S.c. match                                                     |
| CA5478 | 1.1 | 1.0 | 1.4 | 1.0 | JEN2       | complemer carboxylic acid transpc orf19.12767           | 8196 CaJEN2     | C-compound and carbohydrate metabolism TRANSPORT FACILITATION                 |
| CA5479 | 1.3 |     | 1.0 | 0.8 | IPF8205    | complemer unknown function orf19.5311                   | 8205 IPF8205    | No significant S.c. match                                                     |
| CA5480 | 0.7 | 1.0 | 1.0 | 1.0 | IPF8210    | complemer unknown function orf19.5312                   | 8210 IPF8210    | Amino acid transcription regulator activity                                   |
| CA5481 | 1.0 | 0.8 | 1.2 | 1.0 | IPF19810   | complemer unknown function orf19.12773                  | 19810 IPF19810  | No significant S.c. match                                                     |
| CA5482 | 0.8 | 1.0 | 0.8 | 1.3 | IPF14094.f | 16424046..repeated protein (10 tir orf19.5315           | 7748 IPF14094.f | No significant S.c. match                                                     |
| CA5483 | 1.1 | 0.8 | 0.8 | 1.1 | IPF817     | complemer unknown function orf19.5316                   | 817 IPF817      | UNCLASSIFIED PROTEINS                                                         |
| CA5484 | 1.3 | 1.1 | 1.2 | 0.9 | RAD1.3F    | complemer UV endonuclease, com orf19.5318               | 815 CaRAD1.3f   | CELL CYC DNA binding                                                          |
| CA5485 | 1.1 | 1.0 | 1.0 | 1.2 | RAD1.53F   | complemer UV endonuclease, com orf19.5319               | 18099 CaRAD1.5f | CELL CYCLE AND DNA PROCESSING SUBCELLULAR LOCALISATION                        |
| CA5486 | 0.7 | 1.1 | 1.2 | 1.2 | IPF813     | 16434892..unknown function orf19.5320                   | 813 IPF813      | No significant S.c. match                                                     |
| CA5487 | 0.9 | 1.0 | 1.2 | 1.0 | MET12      | complemer methylenetetrahydrofo orf19.5321              | 812 CaMET12     | Metabolism oxidoreductase activity                                            |
| CA5488 | 1.2 | 1.0 | 1.0 | 0.8 | IPF810     | complemer unknown function orf19.5322                   | 810 IPF810      | UNCLASSIenzyme regulator activity                                             |
| CA5489 | 1.8 | 1.0 | 1.6 | 0.7 | MDH12      | 16438979..mitochondrial malate d orf19.5323             | 807 CaMDH12     | C-compou oxidoreductase activity                                              |
| CA5490 | 1.8 | 1.0 | 0.9 | 0.8 | KIN3       | complemer G2-specific serine/thre orf19.5325            | 802 CaKIN3      | CLASSIFICprotein kinase activity                                              |
| CA5491 | 1.1 | 1.1 | 1.1 | 0.9 | IPF798     | 16443656..transcriptional regulato orf19.5326           | 798 IPF798      | C-compou transcription regulator activity                                     |
| CA5492 | 1.4 | 1.0 | 1.0 | 1.0 | GCN1.3F    | complemer translational activator, orf19.5328           | 797 CaGCN1.3    | PROTEIN SYNTHESIS SUBCELLULAR LOCALISATION                                    |
| CA5493 | 1.8 | 1.1 | 1.0 | 0.9 | GCN1.5F    | complemer translational activator, orf19.5333           | 793 CaGCN1.5    | PROTEIN {molecular_function unknown                                           |
| CA5494 | 0.3 | 0.4 | 0.8 | 0.9 | IPF85      | complemer similar to Saccharomy orf19.5334              | 785 IPF85       | TRANSCR molecular_function unknown                                            |
| CA5495 | 0.9 | 0.8 | 1.0 | 1.0 | SGS1       | 16453723..ATP-dependent DNA orf19.5335                  | 783 CaSGS1      | CELL CYC DNA binding, helicase activity                                       |
| CA5496 | 0.8 | 1.0 | 1.0 | 1.0 | IPF779     | 16457414..E2 ubiquitin conjugatin orf19.5337            | 779 IPF779      | PROTEIN FATE [folding modification destination]                               |
| CA5497 | 0.3 | 0.9 |     | 1.1 | IPF776     | 16459065..transcriptional activato orf19.5338           | 776 IPF776      | C-compound and carbohydrate metabolism TRANSCRIPTION SUBCELLULAR LOCALISATION |
| CA5498 | 0.5 | 1.0 | 1.0 | 0.9 | IPF772     | 16460511..unknown function orf19.5340                   | 772 IPF772      | PROTEIN {enzyme regulator activity                                            |
| CA5499 | 0.3 | 0.5 |     | 0.6 | RPS4A      | 16462327..ribosomal protein S4 orf19.5341               | 771 CaRPS4A     | PROTEIN {structural molecule activity                                         |
| CA5500 | 0.6 | 1.1 | 0.9 | 1.0 | IPF768     | 16463208..unknown function orf19.5342                   | 768 IPF768      | UNCLASSIMolecular_function unknown                                            |
| CA5501 | 0.8 | 0.9 | 1.0 | 1.1 | MTR2.3     | complemer mRNA transport protein, 3-prime en orf19.5343 | 767 CaMTR2.3    | TRANSCR protein binding                                                       |
| CA5502 | 1.4 | 0.9 | 1.0 | 1.2 | IPF763     | 16467039..putative transcription f orf19.5343           | 763 IPF763      | TRANSCR transcription regulator activity                                      |
| CA5503 | 0.8 | 0.6 | 0.9 | 1.1 | DSK2       | 16468574..ubiquitin-like protein (b orf19.5345          | 761 CaDSK2      | CELL CYCLE AND DNA PROCESSING SUBCELLULAR LOCALISATION                        |
| CA5504 | 0.7 | 1.1 |     | 1.2 | TAF65      | 16469753..subunit of transcription orf19.5346           | 758 CaTAF65     | TRANSCR transcription regulator activity                                      |
| CA5505 | 1.3 | 1.3 | 0.8 | 0.8 | TPS3.3     | 16471311..alpha, alpha-trehalose- orf19.5348            | 753 CaTPS3.3    | C-compou transferase activity                                                 |
| CA5506 | 1.2 | 1.2 | 1.0 | 1.1 | IPF748     | complemer unknown function orf19.5350                   | 748 IPF748      | TRANSCR protein kinase activity                                               |
| CA5507 | 0.9 | 0.9 | 1.1 | 1.1 | TIF11      | 16475396..translation initiation fac orf19.5351         | 747 CaTIF11     | PROTEIN {translation regulator activity                                       |
| CA5508 | 0.6 | 1.0 | 1.1 | 1.2 | IPF745     | complemer unknown function orf19.5352                   | 745 IPF745      | UNCLASSIFIED PROTEINS                                                         |
| CA5509 | 1.3 | 1.1 | 1.2 | 0.9 | IPF743     | 16477379..unknown function orf19.5353                   | 743 IPF743      | TRANSPORT FACILITATION                                                        |
| CA5510 | 1.3 | 0.6 |     | 1.3 | IPF741     | complemer unknown function orf19.5356                   | 741 IPF741      | UNCLASSIMolecular_function unknown                                            |
| CA5511 | 1.2 | 1.2 | 1.2 | 1.0 | AKL1       | complemer serine/threonine protei orf19.5357            | 737 CaAKL1      | CELL CYC protein kinase activity                                              |
| CA5512 | 1.1 | 1.0 | 1.1 | 1.0 | ORC2       | complemer origin recognition comp orf19.5358            | 733 CaORC2      | CELL CYC DNA binding                                                          |
| CA5513 | 0.7 | 1.1 |     | 1.1 | RPC11      | 16485782..RNA polymerase III C1 orf19.5360              | 731 CaRPC11     | TRANSCR nucleotidyltransferase activity                                       |
| CA5514 | 0.8 | 1.1 | 0.9 | 1.0 | IPF730     | complemer unknown function orf19.5362                   | 730 IPF730      | No significant S.c. match                                                     |
| CA5515 | 1.2 | 1.1 |     | 0.8 | SAT2       | complemer putative glycosyl-transi orf19.5363           | 728 CaSAT2      | CELL RES molecular_function unknown                                           |
| CA5516 | 1.0 | 1.0 | 1.2 | 1.0 | IPF726     | 16488869..rna binding protein (by orf19.5364            | 726 IPF726      | CONTROL molecular_function unknown                                            |
| CA5517 | 0.9 | 0.9 | 0.9 | 1.0 | IPF721.3F  | complemer unknown function, 3-pr orf19.5365             | 724 IPF721.3f   | UNCLASSIFIED PROTEINS                                                         |
| CA5518 | 0.9 | 1.1 | 1.0 | 0.9 | IPF721.5F  | complemer unknown function, 5-pr orf19.5366             | 721 IPF721.5f   | UNCLASSIMolecular_function unknown                                            |
| CA5519 | 0.8 | 0.9 | 1.0 | 0.9 | RDH54      | 16494038..helicase required for m orf19.5367            | 718 CaRDH54     | CELL CYC DNA binding                                                          |
| CA5520 | 0.7 | 1.1 | 0.9 | 1.0 | IPF714     | complemer unknown function orf19.5368                   | 714 IPF714      | UNCLASSIMolecular_function unknown                                            |
| CA5521 | 0.9 | 0.9 | 0.9 | 0.9 | HEM12      | complemer uroporphyrinogen decc orf19.5369              | 712 CaHEM12     | Metabolism lyase activity                                                     |
| CA5522 | 1.2 | 1.8 |     | 1.3 | IPF708     | 16499832..unknown function orf19.5370                   | 708 IPF708      | UNCLASSIFIED PROTEINS                                                         |
| CA5523 | 0.9 | 0.8 | 0.8 | 1.0 | NIT2       | complemer Nitrlase (by homology, orf19.7279             | 2865 CaNIT2     | Nitrogen ar hydrolase activity                                                |
| CA5524 | 1.8 | 1.4 | 1.2 | 0.9 | IPF2861    | 16509683..putative pyruvate dehy orf19.7281             | 2861 IPF2861    | Amino acid metabolism                                                         |
| CA5525 | 1.2 | 1.2 | 1.1 | 0.9 | PEX13      | 16512069..Peroxisome import pro orf19.7282              | 2859 CaPEX13    | PROTEIN {protein binding                                                      |
| CA5526 | 1.2 | 1.2 | 1.1 | 1.1 | IPF2857    | complemer unknown function orf19.7284                   | 2857 IPF2857    | UNCLASSIFIED PROTEINS                                                         |
| CA5527 | 1.9 | 1.2 | 1.2 | 0.9 | IPF2856    | complemer unknown function orf19.7285                   | 2856 IPF2856    | UNCLASSIRNA binding                                                           |
| CA5528 | 0.9 | 0.8 |     | 1.1 | RPN7       | complemer Subunit of the regulato orf19.7286            | 2855 CaRPN7     | PROTEIN {peptidase activity                                                   |
| CA5529 | 1.5 | 1.9 | 1.1 | 1.2 | IPF2852    | 16518952..putative acetyl-coenzyn orf19.7288            | 2852 IPF2852    | No significant S.c. match                                                     |
| CA5530 | 0.9 | 1.2 | 1.1 | 0.9 | SPB8       | complemer Suppressor of PAB1 (t orf19.7290              | 2850 CaSPB8     | TRANSCR RNA binding                                                           |
| CA5531 | 1.0 | 1.2 | 1.1 | 0.9 | GCD14      | 16521513..Translational represso orf19.7291             | 2848 CaGCD14    | PROTEIN {transferase activity                                                 |
| CA5532 | 1.0 | 0.9 | 1.0 | 1.0 | ARP2       | 16522913..actin-like protein (by h orf19.7292           | 2847 CaARP2     | CELL CYC structural molecule activity                                         |
| CA5533 | 0.9 | 1.0 | 1.0 | 0.9 | IPF2846    | complemer similar to Saccharomy orf19.7293              | 2846 IPF2846    | CELL CYC protein kinase activity                                              |
| CA5534 | 1.1 | 1.0 | 1.2 | 1.1 | IPF2843    | complemer unknown function orf19.7295                   | 2843 IPF2843    | PROTEIN {protein binding                                                      |
| CA5535 | 1.5 | 3.5 | 2.4 | 1.0 | IPF2839    | complemer unknown function orf19.7296                   | 2839 IPF2839    | No significant S.c. match                                                     |

|        |     |     |     |     |            |                                                |       |            |                                                                                                     |
|--------|-----|-----|-----|-----|------------|------------------------------------------------|-------|------------|-----------------------------------------------------------------------------------------------------|
| CA5536 | 0.9 | 1.1 | 0.9 | 0.8 | IPF2837    | complemer putative cystathionine orf19.7297    | 2837  | IPF2837    | Amino acid lyase activity                                                                           |
| CA5537 | 1.3 | 0.9 | 0.9 | 1.3 | CHS2       | complemer Chitin synthase orf19.7298           | 2836  | CaCHS2     | C-compour transferase activity                                                                      |
| CA5538 | 0.9 | 1.3 | 0.8 | 1.2 | IPF2830    | 16539029..unknown function orf19.7300          | 2830  | IPF2830    | No significant S.c. match                                                                           |
| CA5541 | 0.4 | 0.3 |     | 1.1 | IPF2827    | complemer unknown function orf19.7303          | 2827  | IPF2827    | No significant S.c. match                                                                           |
| CA5542 |     |     |     |     | IPF19812   | complement(16543967..16545445)                 |       |            |                                                                                                     |
| CA5543 | 1.1 | 0.8 |     | 1.0 | IPF5988    | complemer unknown function orf19.7305          | 5988  | IPF5988    | No significant S.c. match                                                                           |
| CA5544 | 0.7 | 1.0 | 0.8 | 0.8 | IPF5987    | complemer unknown function orf19.7306          | 5987  | IPF5987    | UNCLASSI molecular_function unknown                                                                 |
| CA5545 | 0.7 | 0.7 | 1.0 | 1.2 | IPF5986    | complemer similar to cytochrome-t orf19.7307   | 5986  | IPF5986    | ENERGY molecular_function unknown                                                                   |
| CA5546 | 0.3 | 0.1 | 0.4 | 0.8 | TUB1.3     | complemer Alpha-1 tubulin, 3-prim orf19.7308   | 5983  | CaTUB1.3   | CELL CYC structural molecule activity                                                               |
| CA5547 | 2.5 | 2.4 |     | 1.4 | IPF5981    | complemer similar to Saccharomy orf19.7310     | 5981  | IPF5981    | UNCLASSI molecular_function unknown                                                                 |
| CA5548 | 1.0 | 0.8 | 1.0 | 0.9 | IPF5978    | 16557890..unknown function orf19.7311          | 5978  | IPF5978    | No significant S.c. match                                                                           |
| CA5549 | 0.8 | 0.6 | 0.8 | 0.9 | ERG13      | complemer 3-hydroxy-3-methylglu orf19.7312     | 5977  | CaERG13    | Lipid fatty-ε transferase activity                                                                  |
| CA5550 | 0.8 | 0.8 | 1.2 | 0.9 | SSU1       | complemer Sulfite sensitivity prote orf19.7313 | 5976  | CaSSU1     | CELL RES transporter activity                                                                       |
| CA5551 | 0.7 | 0.3 | 0.9 | 0.7 | IPF5972    | 16565046..putative cysteine dioxy orf19.7314   | 5972  | IPF5972    | No significant S.c. match                                                                           |
| CA5552 | 0.7 | 0.9 | 1.2 | 1.0 | IPF5971    | complemer unknown function orf19.7316          | 5971  | IPF5971    | No significant S.c. match                                                                           |
| CA5553 | 1.0 | 0.9 | 0.9 | 0.9 | IPF1960.3f | complemer putative transcriptional orf19.7317  | 5969  | IPF1960.3f | Nitrogen and sulphur metabolism TRANSCRIPTION SUBCELLULAR LOCALISATION                              |
| CA5554 | 1.2 | 0.9 | 0.9 | 0.8 | IPF1960.5f | complemer putative transcriptional orf19.7318  | 1960  | IPF1960.5f | TRANSCRIPTION SUBCELLULAR LOCALISATION                                                              |
| CA5555 | 1.3 | 0.8 | 1.0 | 0.8 | SUC1       | 16568981..Putative zinc finger prc orf19.7319  | 1962  | CaSUC1     | C-compour DNA binding                                                                               |
| CA5556 | 1.7 | 1.3 | 1.2 |     | LIP7       | complemer Secretory lipase orf19.7320          | 1964  | CaLIP7     | Other virulence attributes                                                                          |
| CA5557 | 1.3 | 1.0 | 1.0 | 0.9 | IPF1968    | complemer unknown function orf19.7321          | 1968  | IPF1968    | UNCLASSI molecular_function unknown                                                                 |
| CA5558 | 0.6 | 1.2 | 1.2 | 1.1 | IPF1969    | complemer unknown function orf19.7322          | 1969  | IPF1969    | UNCLASSI molecular_function unknown                                                                 |
| CA5559 | 0.8 | 1.9 | 0.8 | 1.4 | CBP1       | complemer Corticosteroid binding orf19.7323    | 1971  | CaCBP1     | Metabolism of vitamins cofactors and prosthetic groups                                              |
| CA5560 |     | 1.0 | 1.0 | 1.0 | THI13      | 16579519..Pyrimidine precursor b orf19.7324    | 1974  | CaTHI13    | Nucleotide molecular_function unknown                                                               |
| CA5561 | 0.9 | 1.1 | 0.8 | 0.9 | SCO1       | complemer Inner mitochondrial me orf19.7325    | 1975  | CaSCO1     | PROTEIN I molecular_function unknown                                                                |
| CA5562 |     |     |     |     | IPF1977    | 16582043..16583782                             |       |            |                                                                                                     |
| CA5563 | 0.6 | 0.8 | 0.7 | 1.2 | PHO88      | complemer Involved in phosphate orf19.7327     | 1978  | CaPHO88    | Phosphate transporter activity                                                                      |
| CA5564 | 1.1 | 0.8 | 0.9 | 1.1 | IPF1980    | complemer unknown function orf19.7328          | 1980  | IPF1980    | No significant S.c. match                                                                           |
| CA5565 | 0.4 | 0.7 | 0.8 | 0.9 | QR18       | 16588317..E2 ubiquitin-conjugatio orf19.7329   | 1981  | CaQR18     | PROTEIN I ligase activity                                                                           |
| CA5566 | 1.0 | 0.8 | 1.0 | 1.1 | PET18      | complemer Putative transcriptional orf19.7330  | 1983  | CaPET18    | TRANSCR molecular_function unknown                                                                  |
| CA5567 | 1.0 | 0.9 | 1.0 | 1.0 | FCY24      | 16590399..Putative purine-cytosin orf19.7331   | 1985  | CaFCY24    | Nucleotide metabolism TRANSPORT FACILITATION                                                        |
| CA5568 | 1.3 | 1.0 | 1.2 | 1.0 | ELF1       | 16592349..Elongation-like factor orf19.7332    | 1989  | CaELF1     | PROTEIN I transporter activity,hydrolase activity                                                   |
| CA5569 | 0.5 | 1.2 |     | 1.0 | PRE8       | 16596456..20S proteasome subur orf19.7335      | 1990  | CaPRE8     | PROTEIN I peptidase activity                                                                        |
| CA5570 | 1.0 | 0.9 | 1.1 | 1.1 | IPF1992    | complemer putative MFS transport orf19.7336    | 1992  | IPF1992    | CELL RESCUE DEFENSE AND VIRULENCE ""TRANSPORT FACILITATION                                          |
| CA5571 | 0.9 | 0.9 | 1.0 | 0.9 | IPF2001    | 16607554..unknown function orf19.7337          | 2001  | IPF2001    | No significant S.c. match                                                                           |
| CA5572 | 1.0 | 1.1 | 0.8 | 1.2 | BGL22      | complemer endo-beta-1,3-glucana orf19.7339     | 2004  | CaBGL22    | No significant S.c. match                                                                           |
| CA5573 | 1.2 | 1.1 | 0.9 | 0.9 | IPF2005    | complemer unknown function                     | 2005  | IPF2005    | No significant S.c. match                                                                           |
| CA5574 | 1.2 | 1.0 | 1.0 | 0.9 | IPF2007    | complemer unknown function orf19.7341          | 2007  | IPF2007    | No significant S.c. match                                                                           |
| CA5575 | 0.6 | 0.8 | 0.9 |     | IPF19813   | 16624459..unknown function orf19.7342          | 19813 | IPF19813   | PROTEIN FATE [folding modification destination] ""CELL FATE                                         |
| CA5576 | 0.9 | 1.0 | 1.0 | 1.1 | PRP4       | 16629096..pre-mRNA-processing orf19.7343       | 12538 | CaPRP4     | TRANSCR RNA binding                                                                                 |
| CA5577 | 1.1 | 1.0 | 1.0 | 1.1 | IPF12537   | 16630917..unknown function orf19.7344          | 12537 | IPF12537   | UNCLASSI molecular_function unknown                                                                 |
| CA5578 | 0.9 | 1.1 | 1.0 | 0.9 | IPF12536   | complemer unknown function orf19.7345          | 12536 | IPF12536   | UNCLASSI molecular_function unknown                                                                 |
| CA5579 | 1.3 | 1.0 | 1.0 | 1.3 | IPF5661    | complemer unknown function orf19.7125          | 5661  | IPF5661    | No significant S.c. match                                                                           |
| CA5580 | 0.5 | 1.3 | 0.9 | 1.0 | RVS161     | complemer cytoskeletal binding pr orf19.7124   | 5657  | CaRVS161   | CELLULAF protein binding                                                                            |
| CA5581 | 1.2 | 1.5 | 1.1 | 1.2 | RAD3       | complemer DNA helicase/ATPase orf19.7119       | 5649  | CaRAD3     | CELL CYC DNA binding,helicase activity                                                              |
| CA5582 | 1.1 | 1.3 | 0.9 | 0.9 | ADK2       | complemer adenylate kinase, mito orf19.7118    | 5646  | CaADK2     | Nucleotide transferase activity                                                                     |
| CA5583 | 1.0 | 1.1 | 1.1 | 0.9 | IPF5644    | complemer unknown function orf19.7116          | 5644  | IPF5644    | PROTEIN I transcription regulator activity                                                          |
| CA5584 | 0.9 | 1.3 | 0.9 | 0.9 | SAC7       | complemer GAP for RHO1 by hom orf19.7115       | 5642  | CaSAC7     | PROTEIN I signal transducer activity                                                                |
| CA5585 | 1.6 | 0.6 | 1.6 | 0.5 | CSA1       | complemer mycelial surface antige orf19.7114   | 5641  | CaCSA1     | No significant S.c. match                                                                           |
| CA5586 | 4.6 | 3.4 |     | 1.9 | IPF5625    | 16649726..unknown function orf19.7112          | 5625  | IPF5625    | REGULATION OF/INTERACTION WITH CELLULAR ENVIRONMENT Other virulence attributes                      |
| CA5588 | 0.6 | 1.1 | 1.0 | 1.1 | SOD22.3F   | 16651661..superoxide dismutase, 3-prime end    | 5622  | CaSOD22.   | CELL RESCUE DEFENSE AND VIRULENCE ""SUBCELLULAR LOCALISATION                                        |
| CA5589 |     | 0.8 | 1.1 | 1.0 | IPF5621    | 16652423..unknown function orf19.7111          | 5621  | IPF5621    | CONTROL molecular_function unknown                                                                  |
| CA5590 | 0.9 | 0.8 | 0.7 | 1.0 | TAD1       | 16652934..Double-stranded ma s orf19.7110      | 5619  | CaTAD1     | TRANSCR hydrolase activity                                                                          |
| CA5591 | 0.7 | 0.8 | 1.1 | 0.9 | IPF5618    | complemer unknown function orf19.7109          | 5618  | IPF5618    | UNCLASSI molecular_function unknown                                                                 |
| CA5593 | 0.4 | 1.1 | 0.9 | 0.9 | IPF5615    | 16654858..unknown function orf19.7107          | 5615  | IPF5615    | UNCLASSI molecular_function unknown                                                                 |
| CA5594 | 1.5 | 0.9 | 1.6 | 0.9 | IPF19814   | 16656751..folate hydrolase (by ho orf19.7106   | 19814 | IPF19814   | REGULATI molecular_function unknown                                                                 |
| CA5595 | 1.1 | 1.0 | 1.1 | 1.2 | IPF568     | 16659215..similar to Saccharomy orf19.7105     | 568   | IPF568     | CELL CYC enzyme regulator activity                                                                  |
| CA5596 | 0.9 | 1.1 | 1.0 | 1.1 | IPF564     | 16661741..unknown function orf19.7104          | 564   | IPF564     | No significant S.c. match                                                                           |
| CA5597 | 0.8 | 1.0 | 1.0 | 1.0 | IPF563     | 16662817..unknown function orf19.7103          | 563   | IPF563     | UNCLASSI molecular_function unknown                                                                 |
| CA5598 | 0.4 | 1.0 | 0.8 | 1.0 | IPF562     | complemer unknown function orf19.7101          | 562   | IPF562     | SUBCELLL DNA binding                                                                                |
| CA5599 | 0.5 | 1.0 | 0.9 | 0.7 | IPF560     | 16666230..unknown function orf19.7102          | 560   | IPF560     | UNCLASSIFIED PROTEINS                                                                               |
| CA5600 | 0.7 | 0.8 | 0.9 | 1.1 | IPF559     | 16667458..unknown function orf19.7100          | 559   | IPF559     | TRANSPO transporter activity                                                                        |
| CA5601 | 1.0 | 1.1 | 1.2 | 1.0 | IPF556     | 16669489..transcriptional regulato orf19.7098  | 556   | IPF556     | TRANSCR molecular_function unknown                                                                  |
| CA5602 | 0.8 | 0.8 |     | 1.0 | IPF554     | complemer RNA binding protein (b orf19.7097    | 554   | IPF554     | TRANSCRIPTION                                                                                       |
| CA5603 | 1.5 | 0.8 | 1.0 | 0.8 | IPF553     | complemer unknown function orf19.7096          | 553   | IPF553     | UNCLASSI molecular_function unknown                                                                 |
| CA5604 | 0.9 | 0.8 | 1.0 | 1.1 | IPF549     | 16674186..unknown function orf19.7095          | 549   | IPF549     | UNCLASSI molecular_function unknown                                                                 |
| CA5605 | 1.0 | 0.5 |     | 1.0 | SNF31      | 16677266..high-affinity glucose tr orf19.7094  | 546   | CaSNF31    | C-compound and carbohydrate metabolism CELLULAR TRANSPORT AND TRANSPORT MECHANISMS REGULATION OF/II |
| CA5606 | 0.9 | 0.9 | 1.1 | 1.1 | STL2.3F    | complemer sugar transporter, 3-prime end (by h | 542   | CaSTL2.3f  | C-compound and carbohydrate metabolism SUBCELLULAR LOCALISATION TRANSPORT FACILITATION              |
| CA5607 | 0.9 | 1.0 | 0.9 | 0.9 | STL2.5F    | complemer sugar transporter, 5-pr orf19.7093   | 541   | CaSTL2.5f  | C-compound and carbohydrate metabolism SUBCELLULAR LOCALISATION TRANSPORT FACILITATION              |
| CA5608 | 0.9 | 1.2 | 0.9 | 1.1 | IPF539     | 16681988..unknown function orf19.7092          | 539   | IPF539     | UNCLASSI molecular_function unknown                                                                 |
| CA5609 | 1.2 | 0.8 | 0.9 | 1.1 | IPF538     | complemer unknown function orf19.7091          | 538   | IPF538     | No significant S.c. match                                                                           |
| CA5610 | 0.8 | 1.0 | 0.9 | 0.9 | PMR1       | complemer calcium/mangenease F orf19.7089      | 534   | CaPMR1     | CELLULAF transporter activity                                                                       |

|        |     |     |     |     |           |                                             |            |                |                                                                                                         |
|--------|-----|-----|-----|-----|-----------|---------------------------------------------|------------|----------------|---------------------------------------------------------------------------------------------------------|
| CA5611 | 0.8 | 1.0 | 1.2 | 1.0 | SUA5      | complemer translation initiation prc        | orf19.7088 | 529 CaSUA5     | PROTEIN {molecular_function unknown}                                                                    |
| CA5612 | 1.6 | 1.1 | 1.1 | 0.9 | KAP114    | complemer putative RAN-binding r            | orf19.7086 | 527 CaKAP114   | PROTEIN {protein binding}                                                                               |
| CA5613 | 0.8 | 1.9 | 1.1 | 1.0 | IPF525    | complemer unknown function                  | orf19.7085 | 525 IPF525     | No significant S.c. match                                                                               |
| CA5614 | 0.6 | 0.7 | 0.8 | 0.7 | IPF522    | 16694750..unknown function                  | orf19.7084 | 522 IPF522     | No significant S.c. match                                                                               |
| CA5615 | 1.1 | 1.0 | 0.9 | 0.8 | IPF520    | 16695958..unknown function                  | orf19.7083 | 520 IPF520     | CELL CYC molecular_function unknown                                                                     |
| CA5616 | 1.0 | 1.0 |     | 0.8 | PET8      | 16697116..mitochondrial carrier p           | orf19.7082 | 519 CaPET8     | CELLULAF transporter activity                                                                           |
| CA5617 | 1.2 | 1.6 | 1.1 | 1.0 | SPL1      | 16698157..tRNA splicing protein             | orf19.7081 | 518 CaSPL1     | REGULATI lyase activity                                                                                 |
| CA5618 | 0.8 | 0.8 | 0.9 | 1.1 | LEU2      | 16699837..isopropyl malate dehy             | orf19.7080 | 516 CaLEU2     | Amino acid oxidoreductase activity                                                                      |
| CA5619 | 0.9 | 0.9 | 1.0 | 1.1 | IPF514    | complemer similar to Saccharomy             | orf19.7079 | 514 IPF514     | CELL FAT {molecular_function unknown}                                                                   |
| CA5620 |     | 0.9 |     | 1.0 | IPF511    | complemer unknown function                  | orf19.7078 | 511 IPF511     | No significant S.c. match                                                                               |
| CA5621 | 1.2 | 1.0 |     | 1.1 | FRE7      | 16706280..Ferric reductase trans            | orf19.7077 | 507 CaFRE7     | REGULATI oxidoreductase activity                                                                        |
| CA5622 | 1.0 | 0.8 |     | 1.1 | GBP2.3    | complemer single-strand telomeric           | orf19.7076 | 506 CaGBP2.3   | PROTEIN tRNA binding                                                                                    |
| CA5623 | 1.1 | 0.9 | 0.8 | 1.2 | IPF502    | complemer unknown function                  | orf19.7074 | 502 IPF502     | UNCLASSI molecular_function unknown                                                                     |
| CA5624 | 1.0 | 1.0 | 1.0 | 1.1 | IPF501    | 16711299..unknown function                  | orf19.7073 | 501 IPF501     | UNCLASSIFIED PROTEINS                                                                                   |
| CA5625 | 1.4 | 1.0 | 1.0 | 0.8 | PEL1      | complemer CDP-diacylglycerol-ser            | orf19.7072 | 499 CaPEL1     | Lipid fatty-ε transferase activity                                                                      |
| CA5626 | 1.0 | 1.1 |     | 1.2 | IPF498    | 16715125..unknown function                  | orf19.7071 | 498 IPF498     | Phosphate metabolism CELLULAR TRANSPORT AND TRANSPORT MECHANISMS REGULATION OF/INTERACTION WITH         |
| CA5627 | 0.8 | 0.8 | 1.0 | 1.1 | IPF495    | complemer unknown function                  | orf19.7069 | 495 IPF495     | UNCLASSI transferase activity                                                                           |
| CA5628 | 1.0 | 0.8 | 0.9 | 1.1 | MAC1      | 16718263..putative metal-binding            | orf19.7068 | 492 CaMAC1     | TRANSCRIPTION                                                                                           |
| CA5629 | 0.7 | 1.1 | 1.1 | 1.0 | CTR9      | 16719856..required for G1 cyclin            | orf19.7067 | 489 CaCTR9     | CELL CYC DNA binding                                                                                    |
| CA5630 | 0.6 | 1.0 | 0.9 | 1.0 | IPF486    | complemer unknown function                  | orf19.7065 | 486 IPF486     | UNCLASSI DNA binding                                                                                    |
| CA5631 | 1.0 | 0.9 | 0.9 | 1.1 | GLN4      | complemer glutaminyl-tRNA synth             | orf19.7064 | 485 CaGLN4     | PROTEIN {ligase activity}                                                                               |
| CA5632 | 0.6 | 1.1 | 0.9 | 0.9 | IPF480    | complemer unknown function                  | orf19.7063 | 480 IPF480     | UNCLASSI molecular_function unknown                                                                     |
| CA5633 | 1.0 | 1.3 | 1.0 | 1.0 | RPA135    | 16727850..DNA-directed RNA pol              | orf19.7062 | 479 CaRPA135   | TRANSCR nucleotidyltransferase activity                                                                 |
| CA5634 | 1.0 | 1.0 | 0.9 | 1.1 | IPF477    | complemer unknown function                  | orf19.7061 | 477 IPF477     | UNCLASSI molecular_function unknown                                                                     |
| CA5635 | 0.8 | 0.9 | 0.8 | 0.9 | IPF474    | 16732607..unknown Function                  | orf19.7060 | 474 IPF474     | No significant S.c. match                                                                               |
| CA5636 | 0.9 | 0.9 | 0.9 | 0.8 | IPF473    | complemer unknown Function                  | orf19.7059 | 473 IPF473     | UNCLASSI molecular_function unknown                                                                     |
| CA5637 | 0.8 | 0.9 | 1.0 | 1.1 | IPF472    | complemer unknown Function                  | orf19.7058 | 472 IPF472     | UNCLASSI molecular_function unknown                                                                     |
| CA5638 | 1.1 | 1.1 | 1.1 | 1.1 | IPF470    | 16737308..putative glutamine-tRN            | orf19.7057 | 470 IPF470     | PROTEIN {transferase activity}                                                                          |
| CA5639 | 0.8 | 1.0 | 0.9 | 0.8 | DIP53.EXC | complemer dicarboxylic amino aci            | orf19.7056 | 469 CaDIP53.e  | No significant S.c. match                                                                               |
| CA5641 | 0.7 | 0.7 | 0.8 | 1.0 | GAC1      | complemer ser/thr phosphoprotein            | orf19.7053 | 461 CaGAC1     | C-compour protein phosphatase activity                                                                  |
| CA5642 | 1.3 | 1.1 | 0.9 | 0.7 | INP52     | complemer phosphatidylinositol ph           | orf19.7052 | 451 CaINP52    | Lipid fatty-ε hydrolase activity                                                                        |
| CA5643 | 0.6 | 1.0 | 1.0 | 0.9 | IPF448    | 16762240..unknown function                  | orf19.7051 | 448 IPF448     | UNCLASSI molecular_function unknown                                                                     |
| CA5644 | 1.1 | 0.8 | 0.6 | 1.3 | IPF447    | 16763058..unknown function                  | orf19.7050 | 447 IPF447     | UNCLASSI molecular_function unknown                                                                     |
| CA5645 | 1.5 | 1.3 | 1.1 | 1.0 | CYB5      | 16764907..Cytochrome b5 (by hoi             | orf19.7049 | 443 CaCYB5     | Lipid fatty-ε transporter activity                                                                      |
| CA5646 | 0.7 | 0.6 | 0.8 | 0.9 | RPS28B.3  | 16767339..Ribosomal protein S28B (S33B) (YS |            | 440 CaRPS28B   | UNCLASSI structural molecule activity                                                                   |
| CA5647 | 1.3 | 1.0 | 1.1 | 0.8 | RTF1.5EO  | 16768246..Nuclear protein regulat           | orf19.7048 | 439 CaRTF1.5e  | TRANSCRIPTION SUBCELLULAR LOCALISATION                                                                  |
| CA5648 | 1.4 | 1.1 | 1.0 | 0.8 | UBC6      | 16770989..E2 ubiquitin-conjugat             | orf19.7347 | 7116 CaUBC6    | PROTEIN FATE [folding modification destination] ""CELL FATE SUBCELLULAR LOCALISATION                    |
| CA5649 | 0.9 | 1.3 | 1.0 | 1.1 | CHS4      | 16776234..Chitin synthase regulat           | orf19.7349 | 7112 CaCHS4    | C-compour enzyme regulator activity                                                                     |
| CA5650 | 0.5 | 0.7 | 0.8 | 0.9 | IPF7109   | 16780282..unknown function                  | orf19.7350 | 7109 IPF7109   | UNCLASSI molecular_function unknown                                                                     |
| CA5651 | 0.8 | 1.0 | 1.1 | 1.2 | KIP3      | complemer Kinesin-related protein           | orf19.7353 | 7105 CaKIP3    | CELL CYC motor activity                                                                                 |
| CA5652 | 0.9 | 0.8 | 1.0 | 1.2 | IPF19815  | complemer longevity-assurance pr            | orf19.7354 | 19815 IPF19815 | CELL FATE                                                                                               |
| CA5653 | 1.1 | 1.0 | 1.1 | 1.2 | SSN8      | complemer C-type cyclin associate           | orf19.7355 | 15544 CaSSN8   | C-compour transcription regulator activity                                                              |
| CA5654 | 1.0 | 0.7 | 0.7 | 0.9 | IPF15543  | complemer unknown function                  | orf19.7356 | 15543 IPF15543 | No significant S.c. match                                                                               |
| CA5655 | 1.3 | 1.1 | 1.1 | 1.2 | IPF18080  | 16791138..unknown function                  | orf19.7357 | 18080 IPF18080 | UNCLASSI ligase activity                                                                                |
| CA5656 | 1.3 | 1.0 | 0.9 | 0.9 | IPF14683  | complemer unknown function                  | orf19.7358 | 14683 IPF14683 | UNCLASSI molecular_function unknown                                                                     |
| CA5657 | 1.0 | 1.1 | 1.3 | 0.9 | IPF14682  | complemer putative transcription f          | orf19.7359 | 14682 IPF14682 | TRANSCR DNA binding,transcription regulator activity                                                    |
| CA5658 | 0.8 | 1.0 | 0.6 | 1.0 | IPF1242   | complemer unknown function                  | orf19.7360 | 1242 IPF1242   | UNCLASSI molecular_function unknown                                                                     |
| CA5659 | 1.0 | 0.9 | 1.2 | 1.2 | SEN54     | 16799988..tRNA splicing endonuc             | orf19.7361 | 1243 CaSEN54   | TRANSCR RNA binding                                                                                     |
| CA5660 | 0.6 | 1.0 | 0.7 | 1.1 | SKN1.3    | complemer Glucan synthase subui             | orf19.7362 | 1245 CaSKN1.3  | C-compound and carbohydrate metabolism CELL FATE CONTROL OF CELLULAR ORGANIZATION SUBCELLULAR LOCAL     |
| CA5661 | 0.8 | 1.0 | 1.3 | 1.0 | KRE6      | 16807297..Glucan synthase subui             | orf19.7363 | 1249 CaKRE6    | C-compour hydrolase activity                                                                            |
| CA5662 | 0.9 | 1.0 | 1.0 | 1.1 | IPF1250   | 16811045..Flavin-containing mon             | orf19.7364 | 1250 IPF1250   | Nitrogen and sulphur metabolism                                                                         |
| CA5663 | 0.6 | 1.2 | 0.9 | 1.1 | IPF1251   | 16813355..unknown function                  | orf19.7365 | 1251 IPF1251   | UNCLASSI molecular_function unknown                                                                     |
| CA5664 | 1.0 | 1.1 | 0.9 | 1.1 | IPF1252   | complemer Conserved hypothetic              | orf19.7366 | 1252 IPF1252   | UNCLASSI molecular_function unknown                                                                     |
| CA5665 | 1.0 | 1.0 | 1.0 | 1.0 | UBP1      | complemer Ubiquitin-specific prote          | orf19.7367 | 1255 CaUBP1    | PROTEIN ipeptidase activity                                                                             |
| CA5666 | 1.2 | 0.7 | 0.8 | 1.2 | PUB1      | complemer Major polyadenylated f            | orf19.7368 | 1257 CaPUB1    | TRANSCRIPTION SUBCELLULAR LOCALISATION                                                                  |
| CA5667 | 1.2 | 0.4 | 1.0 | 1.1 | IPF1259   | 16823061..Conserved hypothetic              | orf19.7369 | 1259 IPF1259   | UNCLASSI transferase activity                                                                           |
| CA5668 | 1.2 | 0.7 | 1.0 | 1.2 | IPF1261   | 16824896..unknown function                  | orf19.7370 | 1261 IPF1261   | UNCLASSI molecular_function unknown                                                                     |
| CA5669 | 1.1 | 1.0 | 1.2 | 1.1 | IPF1264   | 16826657..unknown function, Asn             | orf19.7371 | 1264 IPF1264   | TRANSCRIPTION SUBCELLULAR LOCALISATION                                                                  |
| CA5670 | 0.8 | 0.9 | 1.1 | 0.9 | IPF1266   | 16830467..Probable transcription            | orf19.7372 | 1266 IPF1266   | Lipid fatty-acid and isoprenoid metabolism ""TRANSCRIPTION SUBCELLULAR LOCALISATION                     |
| CA5671 | 1.1 | 1.0 | 1.2 | 1.0 | CTA4      | 16835029..Probable transcription            | orf19.7374 | 1269 CaCTA4    | Lipid fatty-ε DNA binding                                                                               |
| CA5672 | 1.1 | 0.9 | 0.9 | 1.0 | IPF1271   | complemer Small nuclear ribonuck            | orf19.7375 | 1271 IPF1271   | TRANSCRIPTION ""PROTEIN FATE [folding modification destination] ""                                      |
| CA5673 | 0.9 | 1.0 | 0.8 | 1.1 | IPF1272   | 16838990..unknown function                  | orf19.7376 | 1272 IPF1272   | TRANSCRIPTION                                                                                           |
| CA5674 | 1.0 | 0.8 |     | 0.9 | IPF1274   | 16841646..similar to Saccharomy             | orf19.7377 | 1274 IPF1274   | CELL CYC protein binding                                                                                |
| CA5675 | 1.5 | 1.1 | 1.0 | 0.9 | SIS2      | complemer Involved in cell cycle-s          | orf19.7378 | 1276 CaSIS2    | CELL CYC lyase activity,enzyme regulator activity                                                       |
| CA5676 | 2.1 | 1.3 |     | 1.1 | FAA22     | complemer Long-chain-fatty-acid--           | orf19.7379 | 1278 CaFAA22   | Lipid fatty-acid and isoprenoid metabolism ""CELLULAR TRANSPORT AND TRANSPORT MECHANISMS SUBCELLULAR LO |
| CA5677 | 0.5 | 1.0 | 0.9 | 1.2 | IPF1286   | complemer unknown function                  | orf19.7380 | 1286 IPF1286   | No significant S.c. match                                                                               |
| CA5678 | 1.4 | 0.8 | 1.1 | 0.9 | IPF1292   | 16863716..unknown function Hypr             | orf19.7381 | 1292 IPF1292   | Amino acid metabolism Nitrogen and sulphur metabolism TRANSCRIPTION SUBCELLULAR LOCALISATION            |
| CA5680 | 0.9 | 0.5 | 0.8 | 0.8 | CAM1.EXC  | 16867852..translation elongation f          | orf19.7382 | 1299 CaCAM1.e  | PROTEIN SYNTHESIS SUBCELLULAR LOCALISATION                                                              |
| CA5681 | 0.9 | 0.9 | 0.7 | 0.9 | MNN9      | 16869877..Required for complex f            | orf19.7383 | 1301 CaMNN9    | C-compour transferase activity                                                                          |
| CA5682 | 1.5 | 1.2 | 1.2 | 1.1 | NOG1      | 16871390..Nucleolar G-protein (b)           | orf19.7384 | 1302 CaNOG1    | UNCLASSI hydrolase activity                                                                             |
| CA5683 | 1.4 | 1.1 | 1.1 | 0.8 | IPF3333   | 16874917..unknown function                  | orf19.7385 | 3333 IPF3333   | UNCLASSI molecular_function unknown                                                                     |

|        |     |     |     |     |            |                                                    |            |       |            |                                                                                                             |
|--------|-----|-----|-----|-----|------------|----------------------------------------------------|------------|-------|------------|-------------------------------------------------------------------------------------------------------------|
| CA5684 | 1.1 | 1.1 | 1.0 | 1.1 | IPF3331    | complemer unknown function                         | orf19.7386 | 3331  | IPF3331    | ENERGY " molecular_function unknown                                                                         |
| CA5685 | 1.6 | 1.2 | 1.2 | 1.2 | HPA1       | 16877752..RNA polymerase II-ass                    | orf19.7387 | 3330  | CaHPA1     | CELL CYC transcription regulator activity                                                                   |
| CA5686 | 1.4 | 0.9 | 1.0 | 1.1 | IPF3329    | complemer similar to Saccharomy                    | orf19.7388 | 3329  | IPF3329    | C-compour protein kinase activity                                                                           |
| CA5687 | 0.9 | 0.9 | 1.1 | 0.9 | REV3.5F    | 16881763..DNA-directed DNA pol                     | orf19.7389 | 3327  | CaREV3.5f  | CELL CYC nucleotidyltransferase activity                                                                    |
| CA5689 | 0.7 | 1.1 | 1.2 | 0.9 | REV3.3F    | 16885545..DNA-directed DNA pol                     | orf19.7390 | 3325  | CaREV3.3f  | CELL CYCLE AND DNA PROCESSING SUBCELLULAR LOCALISATION                                                      |
| CA5690 | 1.3 | 0.8 | 0.8 | 1.0 | OCH1       | complemer Alpha-1,6-mannosyltra                    | orf19.7391 | 3324  | CaOCH1     | C-compour transferase activity                                                                              |
| CA5691 | 2.9 | 1.2 |     | 1.1 | DED1       | complemer RNA helicase (by hom                     | orf19.7392 | 3320  | CaDED1     | TRANSCR RNA binding                                                                                         |
| CA5692 | 1.2 | 0.9 | 0.7 | 1.1 | UTR1       | complemer Associated with ferric r                 | orf19.7393 | 3316  | CaUTR1     | REGULATItransferase activity                                                                                |
| CA5693 | 0.9 | 0.9 | 1.1 | 0.9 | GDA1       | complemer Golgi guanosine diphos                   | orf19.7394 | 3313  | CaGDA1     | PROTEIN hydrolase activity                                                                                  |
| CA5694 | 1.1 | 0.9 |     | 1.0 | IPF3311    | 16898207..unknown function                         | orf19.7396 | 3311  | IPF3311    | No significant S.c. match                                                                                   |
| CA5695 | 0.8 | 1.0 | 1.2 | 1.0 | IPF3310    | 16900279..unknown function                         | orf19.7397 | 3310  | IPF3310    | UNCLASSImolecular_function unknown                                                                          |
| CA5696 | 1.4 | 0.9 | 0.9 | 1.1 | IPF3309.3f | complemer unknown function, 3-prorf                | orf19.7398 | 3309  | IPF3309.3f | UNCLASSIFIED PROTEINS                                                                                       |
| CA5697 | 0.7 | 0.1 | 0.6 | 0.8 | IPF18076.3 | complemer thiol-specific antioxidant-like protein, |            | 18076 | IPF18076.3 | CELL RESCUE DEFENSE AND VIRULENCE ""SUBCELLULAR LOCALISATION                                                |
| CA5699 | 0.8 | 1.0 | 1.2 | 1.0 | ALS7       | complemer agglutinin-like protein                  | orf19.7400 | 19816 | CaALS7     | SUBCELLULAR LOCALISATION Other virulence attributes                                                         |
| CA5700 | 0.9 | 1.0 | 1.0 | 0.9 | IPF2630    | 16916566..unknown function                         |            | 2630  | IPF2630    | No significant S.c. match                                                                                   |
| CA5701 | 1.0 | 1.0 | 1.2 | 1.1 | ISW2       | 16917025..Chromatin remodeling                     | orf19.7401 | 2633  | CaISW2     | TRANSCR hydrolase activity                                                                                  |
| CA5702 | 1.1 | 0.9 | 0.9 | 1.0 | PCH1       | complemer Putative ATPase (by h                    | orf19.7402 | 2639  | CaPCH1     | CELL CYC transferase activity                                                                               |
| CA5703 | 1.1 | 0.8 | 1.0 | 0.9 | IPF2463    | complemer unknown function                         | orf19.7403 | 2643  | IPF2463    | UNCLASSImolecular_function unknown                                                                          |
| CA5704 | 0.7 | 1.0 | 1.0 | 1.2 | CHA11      | complemer L-serine/L-threonine de                  | orf19.7404 | 2644  | CaCHA11    | Amino acid lyase activity                                                                                   |
| CA5705 | 1.1 | 0.9 |     | 1.0 | IPF2645    | 16929431..unknown function                         | orf19.7405 | 2645  | IPF2645    | No significant S.c. match                                                                                   |
| CA5706 | 0.8 | 1.0 | 1.0 | 1.1 | IPF2649    | 16930675..unknown function                         | orf19.7406 | 2649  | IPF2649    | REGULATION OF/INTERACTION WITH CELLULAR ENVIRONMENT Other virulence attributes                              |
| CA5707 | 0.6 | 0.4 | 0.7 | 0.9 | ERV25      | complemer Component of COPII-corf                  | orf19.7409 | 2651  | CaERV25    | CELLULAFmolecular_function unknown                                                                          |
| CA5708 | 1.0 | 0.8 | 0.9 | 1.1 | MRPL39     | 16933753..Mitochondrial 60S ribosomal protein      |            | 2652  | CaMRPL39   | PROTEIN structural molecule activity                                                                        |
| CA5709 | 1.0 | 0.9 | 1.1 | 1.1 | IPF2653    | complemer unknown function                         | orf19.7410 | 2653  | IPF2653    | UNCLASSImolecular_function unknown                                                                          |
| CA5710 | 0.9 | 0.9 | 1.1 | 0.9 | OAC1       | 16937716..Mitochondrial oxaloace                   | orf19.7411 | 2654  | CaOAC1     | CELLULAF transporter activity                                                                               |
| CA5711 | 1.2 | 1.1 | 1.1 | 0.8 | MUB1       | 16939227..Regulation of bud site                   | orf19.7412 | 2656  | CaMUB1     | CELL FATfmolecular_function unknown                                                                         |
| CA5712 | 1.2 | 1.0 | 0.8 | 0.9 | IPF2657    | 16941769..unknown function                         | orf19.7413 | 2657  | IPF2657    | CELL CYC molecular_function unknown                                                                         |
| CA5713 | 1.3 | 1.0 | 1.1 | 0.8 | ALS6       | 16946732..agglutinin-like protein                  | orf19.7414 | 2663  | CaALS6     | CELL FATE SUBCELLULAR LOCALISATION Other virulence attributes                                               |
| CA5714 | 0.1 | 0.3 | 0.2 | 1.0 | IPF2431    | 16952072..similar to Saccharomy                    | orf19.7417 | 2431  | IPF2431    | CELL RES oxidoreductase activity                                                                            |
| CA5715 | 0.4 | 0.9 | 0.8 | 0.9 | HNT2       | 16952914..Diadenosine polyphos                     | orf19.7419 | 2434  | CaHNT2     | Nucleotide hydrolase activity                                                                               |
| CA5716 | 0.8 | 1.1 | 1.1 | 1.1 | MED6       | 16953576..RNA polymerase II tra                    | orf19.7420 | 2436  | CaMED6     | TRANSCR transcription regulator activity                                                                    |
| CA5717 | 0.3 | 1.0 | 0.8 | 1.0 | CYP51      | complemer Cyclophilin - peptidylpr                 | orf19.7421 | 2438  | CaCYP51    | PROTEIN isomerase activity                                                                                  |
| CA5718 | 0.9 | 1.1 | 1.1 | 1.1 | LCP5       | complemer Ngg1p interacting prote                  | orf19.7422 | 2440  | CaLCP5     | TRANSCR RNA binding                                                                                         |
| CA5719 | 1.6 | 1.1 | 0.9 | 0.8 | IPF2441    | 16956623..unknown function                         | orf19.7424 | 2441  | IPF2441    | UNCLASSImolecular_function unknown                                                                          |
| CA5720 | 0.7 | 1.1 | 0.8 | 1.1 | UNG1       | complemer Uracil-DNA glycosylas                    | orf19.7425 | 2442  | CaUNG1     | CELL CYC DNA binding                                                                                        |
| CA5721 | 0.9 | 0.9 | 1.0 | 1.2 | IPF2443    | complemer similar to Saccharomy                    | orf19.7426 | 2443  | IPF2443    | C-compour transferase activity                                                                              |
| CA5722 | 0.7 | 1.2 | 0.9 | 1.2 | IPF2446    | complemer unknown function                         | orf19.7427 | 2446  | IPF2446    | UNCLASSImolecular_function unknown                                                                          |
| CA5723 | 1.0 | 1.1 | 0.8 | 1.1 | APN1       | 16962169..AP endonuclease, exo                     | orf19.7428 | 2448  | CaAPN1     | CELL CYC DNA binding                                                                                        |
| CA5724 | 2.4 | 1.1 | 1.2 | 0.7 | NUP116     | 16963243..nuclear pore protein (b                  | orf19.7433 | 19817 | CaNUP116   | TRANSCR structural molecule activity                                                                        |
| CA5725 | 0.9 | 1.1 | 0.8 | 1.1 | GLG2       | 16967618..Self-glucosylating initia                | orf19.7434 | 2460  | CaGLG2     | C-compound and carbohydrate metabolism ENERGY                                                               |
| CA5726 | 0.9 | 0.9 |     | 1.1 | AAF1       | 16976907..Adhesion and aggrega                     | orf19.7436 | 2468  | CaAAF1     | No significant S.c. match                                                                                   |
| CA5727 | 0.9 | 0.9 | 1.0 | 1.0 | ECM15      | complemer Involved in cell wall biogenesis and i   |            | 2469  | CaECM15    | C-compour molecular_function unknown                                                                        |
| CA5728 | 0.9 | 1.1 | 0.8 | 1.2 | IPF2471    | 16981597..maltose acetyltransfer                   | orf19.7437 | 2471  | IPF2471    | C-compour transferase activity                                                                              |
| CA5729 | 1.1 | 1.3 | 0.9 | 1.1 | UBA1       | 16982761..Ubiquitin-activating en                  | orf19.7438 | 2475  | CaUBA1     | PROTEIN FATE [folding modification destination] """"CELL RESCUE DEFENSE AND VIRULENCE ""SUBCELLULAR LOCALIS |
| CA5730 | 0.8 | 1.1 |     | 1.1 | HST6       | complemer ATP binding cassette f                   | orf19.7440 | 2479  | CaHST6     | CELLULAF transporter activity,hydrolase activity                                                            |
| CA5731 | 1.1 | 1.1 | 1.0 | 1.2 | IPF2870    | complemer unknown function                         | orf19.7441 | 2870  | IPF2870    | UNCLASSIFIED PROTEINS                                                                                       |
| CA5733 | 0.8 | 1.0 |     | 0.9 | IPF2873    | 16991767..unknown function                         | orf19.7443 | 2873  | IPF2873    | No significant S.c. match                                                                                   |
| CA5734 | 1.1 | 1.0 | 0.8 | 0.8 | IPF20029   | complemer unknown function                         | orf19.7444 | 20029 | IPF20029   | UNCLASSImolecular_function unknown                                                                          |
| CA5735 | 1.4 | 0.7 |     | 1.2 | IPF2878    | 16996010..unknown function                         | orf19.7445 | 2878  | IPF2878    | PROTEIN Imolecular_function unknown                                                                         |
| CA5736 | 0.7 | 0.9 | 0.9 | 0.9 | OPI3       | complemer Methylene-fatty-acyl-pl                  | orf19.7446 | 2880  | CaOPI3     | Lipid fatty-ε transferase activity                                                                          |
| CA5737 | 3.2 | 1.5 | 1.6 | 1.1 | JEN1       | 17001627..Carboxylic acid transp                   | orf19.7447 | 2882  | CaJEN1     | C-compour transporter activity                                                                              |
| CA5738 | 0.8 | 1.0 | 1.0 | 0.9 | LYS9       | 17003715..Lysine biosynthesis (b)                  | orf19.7448 | 2883  | CaLYS9     | Amino acid oxidoreductase activity                                                                          |
| CA5739 | 1.1 | 1.0 | 1.0 | 1.0 | IPF2884    | complemer unknown function                         | orf19.7449 | 2884  | IPF2884    | UNCLASSImolecular_function unknown                                                                          |
| CA5740 | 0.7 | 1.0 | 0.9 | 1.2 | IPF20030   | 17007896..unknown function                         | orf19.7450 | 20030 | IPF20030   | UNCLASSImolecular_function unknown                                                                          |
| CA5741 | 0.9 | 1.0 | 1.0 | 0.9 | IPF2891    | 17010126..unknown function                         |            | 2891  | IPF2891    | No significant S.c. match                                                                                   |
| CA5742 | 1.6 | 1.1 | 1.3 | 0.9 | FUN31      | 17010633..Serine/threonine kinas                   | orf19.7451 | 2894  | CaFUN31    | UNCLASSIprotein kinase activity                                                                             |
| CA5743 | 0.9 | 0.9 | 1.0 | 1.0 | IPF2895    | 17015039..unknown function                         | orf19.7452 | 2895  | IPF2895    | UNCLASSIDNA binding                                                                                         |
| CA5744 | 0.8 | 0.9 | 1.1 | 1.0 | IPF2898    | 17017475..unknown function                         | orf19.7453 | 2898  | IPF2898    | No significant S.c. match                                                                                   |
| CA5745 | 0.8 | 0.8 | 1.0 | 1.1 | TAF60      | complemer TATA-binding protein-ε                   | orf19.7454 | 2900  | CaTAF60    | TRANSCR transcription regulator activity                                                                    |
| CA5746 | 1.3 | 1.0 | 1.0 | 0.8 | IPF2902    | complemer unknown function                         | orf19.7455 | 2902  | IPF2902    | UNCLASSIFIED PROTEINS                                                                                       |
| CA5747 | 0.9 | 0.8 | 0.8 | 1.0 | IPF2903    | complemer unknown function                         | orf19.7456 | 2903  | IPF2903    | No significant S.c. match                                                                                   |
| CA5748 | 1.1 | 1.1 | 1.1 | 0.9 | IPF2905    | complemer unknown function                         | orf19.7457 | 2905  | IPF2905    | No significant S.c. match                                                                                   |
| CA5749 | 1.4 | 0.9 | 1.0 | 1.0 | IPF2908    | complemer unknown function                         | orf19.7459 | 2908  | IPF2908    | CELL CYC molecular_function unknown                                                                         |
| CA5750 | 0.6 | 0.9 | 0.7 | 1.0 | CHS21      | complemer Chitin synthase (by ho                   | orf19.5384 | 11660 | CaCHS21    | C-compound and carbohydrate metabolism CELL CYCLE AND DNA PROCESSING CELL FATE SUBCELLULAR LOCALISAT        |
| CA5751 | 1.5 | 0.9 | 1.0 | 1.1 | VPS8       | complemer Vacuolar sorting protei                  | orf19.5387 | 11663 | CaVPS8     | PROTEIN Imolecular_function unknown                                                                         |
| CA5752 | 0.9 | 1.1 | 1.0 | 1.0 | IPF1055    | 17040426..unknown function                         | orf19.5388 | 1055  | IPF1055    | CELL CYC DNA binding,transcription regulator activity                                                       |
| CA5753 | 0.9 | 1.1 | 1.2 | 0.9 | FKH1       | 17043418..Fork head protein type                   | orf19.5389 | 1059  | CaFKH1     | TRANSCR DNA binding,transcription regulator activity                                                        |
| CA5754 | 1.1 | 0.9 | 0.9 | 1.2 | IPF1060    | 17045114..unknown function, Asn                    | orf19.5390 | 1060  | IPF1060    | No significant S.c. match                                                                                   |
| CA5755 | 1.1 | 1.0 | 1.1 | 1.1 | IPF1063    | complemer Spliceosomal protein S                   | orf19.5391 | 1063  | IPF1063    | TRANSCR RNA binding                                                                                         |
| CA5756 | 0.7 | 0.9 | 1.1 | 1.0 | IPF1065    | complemer unknown function                         | orf19.5392 | 1065  | IPF1065    | CELL RESCUE DEFENSE AND VIRULENCE ""TRANSPORT FACILITATION                                                  |
| CA5757 | 0.5 | 0.8 | 0.9 | 1.0 | IPF1067    | complemer Putative glutamate dec                   | orf19.5393 | 1067  | IPF1067    | No significant S.c. match                                                                                   |

|        |     |     |     |     |            |                                              |       |            |                                                                                                                  |
|--------|-----|-----|-----|-----|------------|----------------------------------------------|-------|------------|------------------------------------------------------------------------------------------------------------------|
| CA5758 | 0.9 | 0.9 | 1.0 | 0.9 | IPF1069    | complemer similar to Saccharomy orf19.5395   | 1069  | IPF1069    | ENERGY molecular_function unknown                                                                                |
| CA5759 | 0.7 | 1.1 | 0.9 | 0.9 | PET191.3   | 17059892..Assembly of cytochrome oxidase, 3- | 1071  | CaPET191   | ENERGY " molecular_function unknown                                                                              |
| CA5760 | 1.1 | 0.8 | 0.9 | 0.9 | IPF1072    | complemer unknown function orf19.5397        | 1072  | IPF1072    | UNCLASSI molecular_function unknown                                                                              |
| CA5761 | 1.0 | 1.0 | 0.8 | 1.1 | IFF11      | complemer unknown function orf19.5399        | 1076  | CaIFF11    | No significant S.c. match                                                                                        |
| CA5762 | 1.0 | 0.8 | 1.0 | 1.2 | IPF1084.3  | complemer unknown function, 3-pr orf19.5401  | 1084  | IPF1084.3  | SUBCELLULAR LOCALISATION                                                                                         |
| CA5763 | 0.7 | 0.9 | 0.9 | 1.2 | IFF10.5    | complemer unknown function, 5-pr orf19.5404  | 1089  | CaIFF10.5  | No significant S.c. match                                                                                        |
| CA5764 | 1.3 | 1.1 | 0.9 | 1.1 | IPF20031   | 17073688..similar to Saccharomy orf19.5406   | 20031 | IPF20031   | PROTEIN I protein phosphatase activity                                                                           |
| CA5765 | 1.1 | 1.2 | 0.8 | 1.2 | SOF1       | 17075690..Involved in 18S pre-rR orf19.5407  | 1095  | CaSOF1     | TRANSCR RNA binding                                                                                              |
| CA5766 | 1.7 | 1.2 | 1.2 | 0.9 | IPF1097    | 17078448..serine/threonine protei orf19.5408 | 1097  | IPF1097    | UNCLASSI protein kinase activity                                                                                 |
| CA5767 | 0.8 | 1.1 | 1.1 | 0.9 | IPF1098    | 17080829..unknown function orf19.5409        | 1098  | IPF1098    | UNCLASSI molecular_function unknown                                                                              |
| CA5768 | 0.8 | 0.9 | 0.9 | 1.2 | PAC1       | 17082296..Similarity to human LIS orf19.5410 | 1099  | CaPAC1     | UNCLASSI molecular_function unknown                                                                              |
| CA5769 | 1.0 | 1.0 | 1.3 | 1.0 | UBC12      | complemer E2 ubiquitin-conjugatn orf19.5411  | 1101  | CaUBC12    | PROTEIN FATE [folding modification destination]                                                                  |
| CA5770 | 0.9 | 1.0 | 1.0 | 1.0 | IPF1103    | complemer unknown function orf19.5412        | 1103  | IPF1103    | CONTROL molecular_function unknown                                                                               |
| CA5771 | 1.3 | 1.0 | 1.1 | 0.9 | IPF1104    | 17085835..similar to Saccharomy orf19.5413   | 1104  | IPF1104    | UNCLASSI molecular_function unknown                                                                              |
| CA5772 | 1.0 | 1.1 | 1.2 | 1.0 | ESA1       | complemer Histone acetyltransferz orf19.5416 | 1107  | CaESA1     | CELL CYC transferase activity                                                                                    |
| CA5773 | 1.3 | 1.3 | 1.2 | 0.9 | DOT5       | 17089881..Derepression of telome orf19.5417  | 1111  | CaDOT5     | TRANSCR oxidoreductase activity                                                                                  |
| CA5774 | 0.8 | 0.7 | 0.9 | 0.9 | IPF1113    | complemer unknown function orf19.5418        | 1113  | IPF1113    | UNCLASSI molecular_function unknown                                                                              |
| CA5775 | 1.2 | 0.9 | 0.9 | 0.7 | ATP5       | complemer F1FO-ATPase complex orf19.5419     | 1114  | CaATP5     | ENERGY C structural molecule activity                                                                            |
| CA5776 | 1.2 | 1.1 | 0.9 | 0.8 | RML2       | 17093624..Ribosomal L2 protein, orf19.5420   | 1116  | CaRML2     | PROTEIN I structural molecule activity                                                                           |
| CA5777 | 0.9 | 1.1 | 0.7 | 1.0 | IPF1118    | complemer unknown function orf19.5422        | 1118  | IPF1118    | No significant S.c. match                                                                                        |
| CA5778 | 1.4 | 0.9 | 1.0 | 0.9 | IPF1119    | complemer unknown function orf19.5423        | 1119  | IPF1119    | CELL CYC DNA binding,nucleotidyltransferase activity                                                             |
| CA5779 | 0.9 | 1.1 | 0.8 | 1.2 | IPF1121    | complemer unknown function orf19.5425        | 1121  | IPF1121    | UNCLASSI RNA binding                                                                                             |
| CA5780 | 1.5 | 1.2 | 1.1 | 0.7 | IPF1123    | 17099376..unknown function orf19.5426        | 1123  | IPF1123    | UNCLASSI molecular_function unknown                                                                              |
| CA5781 | 1.3 | 1.1 | 0.7 | 1.1 | IPF1126    | complemer unknown function orf19.5428        | 1126  | IPF1126    | CELL RES transporter activity                                                                                    |
| CA5782 | 1.3 | 1.0 | 1.1 | 0.9 | IPF1127    | 17103226..unknown function orf19.5429        | 1127  | IPF1127    | UNCLASSI molecular_function unknown                                                                              |
| CA5783 | 0.9 | 0.9 | 1.0 | 0.8 | IPF1128    | 17105376..unknown function orf19.5430        | 1128  | IPF1128    | No significant S.c. match                                                                                        |
| CA5784 | 0.8 | 1.0 | 1.0 | 1.0 | IPF1129    | complemer unknown function orf19.5431        | 1129  | IPF1129    | No significant S.c. match                                                                                        |
| CA5785 | 0.8 | 1.0 | 1.2 | 1.1 | TPT1       | complemer tRNA 2 -phosphotransi orf19.5432   | 1133  | CaTPT1     | TRANSCR transferase activity                                                                                     |
| CA5786 | 1.1 | 1.0 | 1.0 | 0.9 | IPF1134    | complemer unknown function orf19.5433        | 1134  | IPF1134    | UNCLASSI molecular_function unknown                                                                              |
| CA5787 | 0.7 | 1.2 | 0.9 | 1.0 | IPF1136    | complemer unknown function orf19.5436        | 1136  | IPF1136    | UNCLASSI RNA binding                                                                                             |
| CA5788 | 1.0 | 0.9 | 0.9 | 0.9 | RHR2       | complemer DL-glycerol phosphata orf19.5437   | 1139  | CaRHR2     | C-compour hydrolase activity                                                                                     |
| CA5789 | 0.8 | 1.1 | 0.9 | 1.0 | IPF1143    | 17115378..Probable zinc-finger pr orf19.5438 | 1143  | IPF1143    | TRANSCR DNA binding                                                                                              |
| CA5790 | 1.2 | 0.9 | 0.8 | 1.1 | IPF1144    | complemer unknown function orf19.5439        | 1144  | IPF1144    | CELL CYCLE AND DNA PROCESSING SUBCELLULAR LOCALISATION                                                           |
| CA5791 | 0.5 | 1.2 | 0.9 | 0.9 | RPT2       | complemer 26S proteasome regul orf19.5440    | 4196  | CaRPT2     | No significc peptidase activity                                                                                  |
| CA5792 | 1.1 | 0.9 | 1.0 | 1.1 | IPF4195    | 17119905..similar to Saccharomy orf19.5441   | 4195  | IPF4195    | CELL CYC peptidase activity                                                                                      |
| CA5793 | 0.9 | 1.2 | 0.9 | 0.9 | IPF4192    | 17122664..unknown function orf19.5442        | 4192  | IPF4192    | UNCLASSIFIED PROTEINS                                                                                            |
| CA5794 | 1.0 | 0.8 | 1.0 | 1.2 | IPF4191    | 17124254..unknown function orf19.5443        | 4191  | IPF4191    | Amino acid oxidoreductase activity                                                                               |
| CA5795 | 0.8 | 1.0 | 1.0 | 1.0 | TIM44      | 17125726..mitochondrial inner me orf19.5444  | 4189  | CaTIM44    | PROTEIN I transporter activity                                                                                   |
| CA5796 | 1.2 | 1.0 | 1.1 | 1.2 | GLO3       | 17127143..zinc finger protein orf19.5445     | 4185  | CaGLO3     | CELL CYC enzyme regulator activity                                                                               |
| CA5797 | 1.9 | 2.0 | 2.2 | 0.9 | IPF4182    | 17128513..unknown function orf19.5446        | 4182  | IPF4182    | No significant S.c. match                                                                                        |
| CA5798 | 2.3 | 1.4 | 1.5 | 1.0 | IPF4181    | complemer putative permease (by orf19.5447   | 4181  | IPF4181    | C-compound and carbohydrate metabolism ""Lipid fatty-acid and isoprenoid metabolism ""CELLULAR TRANSPORT AND TRA |
| CA5799 | 0.9 | 1.0 | 1.0 | 0.9 | IPF4176    | 17131743..unknown function orf19.5449        | 4176  | IPF4176    | UNCLASSIFIED PROTEINS                                                                                            |
| CA5800 | 1.1 | 1.1 | 1.0 | 1.2 | IPF4175    | 17132515..mitochondrial respirato orf19.5450 | 4175  | IPF4175    | TRANSCR oxidoreductase activity                                                                                  |
| CA5801 | 1.3 | 0.9 | 1.1 | 1.0 | DAL1       | 17133747..allantoinase orf19.5454            | 4171  | CaDAL1     | Nitrogen ar hydrolase activity                                                                                   |
| CA5802 | 1.1 | 0.9 | 0.9 | 0.9 | IPF4164    | 17135626..similar to Saccharomy orf19.5455   | 4164  | IPF4164    | CELL FATI molecular_function unknown                                                                             |
| CA5803 | 1.0 | 0.9 | 0.9 | 1.1 | IPF4163    | 17136031..unknown function orf19.5457        | 4163  | IPF4163    | UNCLASSI molecular_function unknown                                                                              |
| CA5804 | 1.4 | 1.0 | 0.9 | 1.0 | IPF4160    | 17137539..unknown function orf19.5459        | 4160  | IPF4160    | SUBCELLL molecular_function unknown                                                                              |
| CA5805 | 0.9 | 1.2 | 1.1 | 1.1 | IPF4153    | 17139185..similar to Saccharomy orf19.5463   | 4153  | IPF4153    | CELLULAF molecular_function unknown                                                                              |
| CA5806 | 0.9 | 0.9 | 1.0 | 1.0 | IPF4149    | complemer unknown function orf19.5465        | 4149  | IPF4149    | SUBCELLL molecular_function unknown                                                                              |
| CA5807 | 0.6 | 0.2 | 0.7 | 1.0 | RPS24      | complemer ribosomal protein S24. orf19.5466  | 4146  | CaRPS24    | PROTEIN I structural molecule activity                                                                           |
| CA5810 | 1.4 | 1.0 | 1.2 | 0.9 | IPF4137.3f | complemer unknown function, 3-prime end      | 19666 | IPF4137.3f | No significant S.c. match                                                                                        |
| CA5811 | 1.1 | 1.0 | 0.8 | 0.8 | IPF2690.5f | 17150621..unknown function, 5-pr orf19.5469  | 2690  | IPF2690.5f | No significant S.c. match                                                                                        |
| CA5812 | 1.2 | 1.0 | 1.1 | 1.1 | IPF2690.3f | 17153754..unknown function, 3-pr orf19.5474  | 2681  | IPF2690.3f | No significant S.c. match                                                                                        |
| CA5813 | 0.9 | 1.0 | 0.9 | 0.9 | IPF2522    | 17159664..unknown function orf19.7460        | 2522  | IPF2522    | UNCLASSI molecular_function unknown                                                                              |
| CA5814 | 1.0 | 1.0 | 0.9 | 0.9 | IPF2521    | complemer putative protease (by h orf19.7463 | 2521  | IPF2521    | PROTEIN I peptidase activity                                                                                     |
| CA5815 | 0.8 | 1.0 | 0.9 | 1.1 | IPF2517    | complemer putative protease (by h orf19.7464 | 2517  | IPF2517    | PROTEIN FATE [folding modification destination]                                                                  |
| CA5816 | 0.9 | 1.1 | 1.0 | 1.0 | ACC1       | complemer acetyl-coenzyme-A car orf19.7466   | 2516  | CaACC1     | Lipid fatty-z ligase activity                                                                                    |
| CA5817 | 1.3 | 1.2 | 1.1 | 0.8 | IPF2511    | complemer unknown function orf19.7468        | 2511  | IPF2511    | UNCLASSI molecular_function unknown                                                                              |
| CA5818 | 1.9 | 2.5 | 1.7 | 1.1 | ARG1       | 17175287..argininosuccinate syntl orf19.7469 | 2508  | CaARG1     | Amino acid ligase activity                                                                                       |
| CA5819 | 1.4 | 1.1 | 1.2 | 1.0 | IFF4       | complemer Unknown function orf19.7472        | 2507  | CaIFF4     | CELL CYCLE AND DNA PROCESSING CELL FATE                                                                          |
| CA5820 | 1.0 | 1.1 | 1.0 | 0.9 | IPF2500    | 17182862..unknown function orf19.7473        | 2500  | IPF2500    | No significant S.c. match                                                                                        |
| CA5821 | 1.2 | 1.1 | 1.0 | 1.1 | PHO81      | complemer Cyclin-dependent kina orf19.7475   | 2499  | CaPHO81    | Phosphate enzyme regulator activity                                                                              |
| CA5822 | 0.6 | 1.1 | 0.9 | 1.0 | YRB1       | complemer GTPase-activating pro orf19.7477   | 2494  | CaYRB1     | TRANSCR protein binding                                                                                          |
| CA5823 | 1.0 | 1.0 | 0.8 | 1.0 | COQ1       | complemer Hexaprenyl pyrophosp orf19.7478    | 2493  | CaCOQ1     | Lipid fatty-z transferase activity                                                                               |
| CA5824 | 1.1 | 1.3 | 1.3 | 1.4 | NTH1       | complemer Neutral trehalase orf19.7479       | 2490  | CaNTH1     | C-compour hydrolase activity                                                                                     |
| CA5825 | 1.2 | 1.2 | 0.9 | 1.0 | IPF2489    | complemer unknown function orf19.7480        | 2489  | IPF2489    | No significant S.c. match                                                                                        |
| CA5826 | 2.0 | 1.8 | 1.8 | 0.8 | MDH11      | 17198457..Malate dehydrogenase orf19.7481    | 2486  | CaMDH11    | C-compound and carbohydrate metabolism ENERGY SUBCELLULAR LOCALISATION                                           |
| CA5827 | 1.2 | 1.0 | 1.0 | 1.1 | IPF2485    | complemer unknown function orf19.7482        | 2485  | IPF2485    | CELLULAR TRANSPORT AND TRANSPORT MECHANISMS CONTROL OF CELLULAR ORGANIZATION                                     |
| CA5828 | 2.0 | 1.6 | 1.0 | 1.4 | CRM1       | 17201081..Nuclear export factor orf19.7483   | 2484  | CaCRM1     | TRANSCR protein binding                                                                                          |
| CA5829 | 1.3 | 1.0 | 0.9 | 0.8 | ADE1       | 17204785..phosphoribosyl-amidoi orf19.7484   | 2482  | CaADE1     | Nucleotide ligase activity                                                                                       |
| CA5830 | 0.7 | 1.1 | 0.9 | 0.9 | MRPL9      | complemer Mitochondrial ribosom: orf19.7485  | 2480  | CaMRPL9    | PROTEIN I structural molecule activity                                                                           |



|        |     |     |     |     |            |                                                |                  |                                                                                                                       |
|--------|-----|-----|-----|-----|------------|------------------------------------------------|------------------|-----------------------------------------------------------------------------------------------------------------------|
| CA5831 | 1.0 | 1.2 | 1.0 | 1.0 | MRPL6      | complemer ribosomal protein L6 p orf19.7486    | 438 CaMRPL6      | PROTEIN structural molecule activity                                                                                  |
| CA5833 | 1.0 | 1.1 | 0.9 | 1.1 | IMP3       | complemer U3 small nucleolar ribc orf19.7488   | 436 CaIMP3       | TRANSCR RNA binding                                                                                                   |
| CA5834 | 0.8 | 1.2 | 1.0 | 1.1 | LRG1       | 17214014..GTPase-activating pro orf19.7489     | 434 CaLRG1       | CELL FAT enzyme regulator activity                                                                                    |
| CA5835 | 0.9 | 0.9 | 1.1 | 0.9 | IPF429     | 17218782..unknown function                     | 429 IPF429       | UNCLASSI molecular_function unknown                                                                                   |
| CA5836 | 0.9 | 1.1 | 1.1 | 1.0 | IPF428     | complemer transport protein (by h orf19.7490   | 428 IPF428       | UNCLASSI molecular_function unknown                                                                                   |
| CA5837 | 0.6 | 1.0 | 1.0 | 1.0 | IPF426     | complemer unknown function orf19.7491          | 426 IPF426       | CLASSIFI C molecular_function unknown                                                                                 |
| CA5838 | 0.9 | 0.9 | 1.0 | 1.0 | IPF424     | 17222636..unknown function orf19.7492          | 424 IPF424       | UNCLASSI molecular_function unknown                                                                                   |
| CA5839 | 1.4 | 1.1 | 0.8 | 0.8 | IPF423     | complemer unknown function orf19.7494          | 423 IPF423       | UNCLASSI molecular_function unknown                                                                                   |
| CA5840 | 0.9 | 1.0 | 1.1 | 1.0 | EBP6       | complemer NADPH dehydrogenas orf19.7495        | 421 CaEBP6       | ENERGY                                                                                                                |
| CA5841 | 0.8 | 0.9 | 1.3 | 1.3 | IPF420     | complemer unknown function orf19.7497          | 420 IPF420       | UNCLASSI protein binding                                                                                              |
| CA5842 | 1.1 | 1.1 | 1.3 | 0.9 | LEU1       | 17234862..3-isopropylmalate dehy orf19.7498    | 417 CaLEU1       | Amino acid lyase activity                                                                                             |
| CA5843 | 1.3 | 1.2 | 1.1 | 0.8 | IPF416     | complemer unknown function orf19.7499          | 416 IPF416       | UNCLASSI nucleotidyltransferase activity                                                                              |
| CA5844 | 0.9 | 1.8 | 1.3 | 0.9 | PXA1       | 17240440..long chain fatty acid A orf19.7500   | 414 CaPXA1       | Lipid fatty-ε transporter activity,hydrolase activity                                                                 |
| CA5845 | 1.1 | 0.8 | 1.1 | 1.1 | NAP1       | 17243186..nucleosome assembly orf19.7501       | 412 CaNAP1       | CELL CYC protein binding                                                                                              |
| CA5846 | 0.7 | 1.8 | 1.0 | 1.2 | IPF409     | 17249939..unknown function orf19.7502          | 409 IPF409       | C-compound and carbohydrate metabolism CELLULAR TRANSPORT AND TRANSPORT MECHANISMS REGULATION OF/ I                   |
| CA5847 | 1.0 | 0.9 | 0.9 | 1.0 | CDA2       | complemer chitin deacetylase (by l orf19.7503  | 408 CaCDA2       | C-compour hydrolase activity                                                                                          |
| CA5848 | 0.9 | 1.3 | 1.2 | 0.9 | IPF407     | complemer unknown function orf19.7504          | 407 IPF407       | UNCLASSI molecular_function unknown                                                                                   |
| CA5849 | 1.2 | 1.0 | 1.1 | 1.3 | IPF404.5F  | 17257630..unknown function, 5-p orf19.7506     | 404 IPF404.5f    | SUBCELLULAR LOCALISATION                                                                                              |
| CA5850 | 1.0 | 1.2 | 1.1 | 1.1 | IPF404.3F  | 17258777..unknown function, 3-p orf19.7507     | 403 IPF404.3f    | No significant S.c. match                                                                                             |
| CA5851 | 1.3 | 1.4 | 1.0 | 1.0 | KIN2       | complemer ser/thr protein kinase ( orf19.7510  | 402 CaKIN2       | SUBCELL protein kinase activity                                                                                       |
| CA5852 | 0.9 | 0.6 | 1.0 | 1.1 | ATP17.3    | complemer F1F0-ATPase complex, F1 delta sub    | 396 CaATP17.3    | ENERGY   transporter activity                                                                                         |
| CA5853 | 0.9 | 0.9 | 1.1 | 0.9 | LSM6       | complemer U6 snRNA-associated Sm-like prote    | 395 CaLSM6       | TRANSCR RNA binding                                                                                                   |
| CA5854 | 0.9 | 1.2 | 0.9 | 1.1 | IPF393     | complemer similar to Saccharomy orf19.7511     | 393 IPF393       | CELLULAF structural molecule activity                                                                                 |
| CA5855 | 1.7 | 1.1 | 1.1 | 1.0 | ALK3       | complemer n-alkane inducible cyt orf19.7512    | 389 CaALK3       | CELL RESCUE DEFENSE AND VIRULENCE ""CELL FATE CONTROL OF CELLULAR ORGANIZATION                                        |
| CA5856 | 0.9 | 1.2 | 1.2 | 1.0 | ALK2       | complemer n-alkane inducible cyt orf19.7513    | 387 CaALK2       | CELL RESCUE DEFENSE AND VIRULENCE ""CELL FATE CONTROL OF CELLULAR ORGANIZATION                                        |
| CA5857 | 3.0 | 0.5 | 1.4 | 1.0 | PCK1       | complemer phosphoenolpyruvate (orf19.7514      | 385 CaPCK1       | C-compour lyase activity                                                                                              |
| CA5858 | 0.7 | 1.1 | 1.2 | 1.0 | IPF380     | complemer unknown function orf19.7516          | 380 IPF380       | No significant S.c. match                                                                                             |
| CA5859 | 1.0 | 1.0 | 1.2 | 1.1 | CHT1       | 17281907..endochitinase 1 precu orf19.7517     | 377 CaCHT1       | C-compound and carbohydrate metabolism CELL CYCLE AND DNA PROCESSING SUBCELLULAR LOCALISATION                         |
| CA5860 | 1.2 | 0.9 | 1.0 | 1.1 | IPF376     | complemer transcriptional regulato orf19.7518  | 376 IPF376       | TRANSCRIPTION ""CELL RESCUE DEFENSE AND VIRULENCE ""SUBCELLULAR LOCALISATION                                          |
| CA5861 | 0.8 | 1.1 | 1.2 | 0.9 | IPF373     | 17285363..unknown function orf19.7519          | 373 IPF373       | No significant S.c. match                                                                                             |
| CA5862 | 1.9 | 2.0 | 1.4 | 1.4 | POT11      | 17286419..peroxysomal 3-ketoacy orf19.7520     | 372 CaPOT11      | Lipid fatty-ε transferase activity                                                                                    |
| CA5863 | 1.3 | 1.0 | 1.2 | 1.1 | IPF370     | complemer unknown function orf19.7521          | 370 IPF370       | No significant S.c. match                                                                                             |
| CA5864 | 1.2 | 1.0 | 1.0 | 0.8 | IPF364     | 17292399..transaminase type I (b orf19.7522    | 364 IPF364       | Nitrogen and sulphur metabolism                                                                                       |
| CA5865 | 0.7 | 1.2 | 0.9 | 1.0 | MKC1       | 17294244..ser/thr protein kinase c orf19.7523  | 363 CaMKC1       | CELL CYC protein kinase activity,signal transducer activity                                                           |
| CA5866 | 1.0 | 1.4 | 0.7 | 1.2 | IPF361     | complemer unknown function orf19.7527          | 361 IPF361       | No significant S.c. match                                                                                             |
| CA5867 | 0.9 | 1.5 | 1.1 | 1.1 | EPL1       | 17299106..DNA-binding protein (t orf19.7529    | 355 CaEPL1       | UNCLASSI transferase activity                                                                                         |
| CA5868 | 0.8 | 0.7 | 1.1 | 1.1 | IPF351     | 17301483..unknown function orf19.7531          | 351 IPF351       | UNCLASSI molecular_function unknown                                                                                   |
| CA5869 | 0.8 | 1.1 | 0.9 | 1.0 | MIS12      | complemer mitochondrial C1-tetra orf19.7534    | 349 CaMIS12      | Amino acid metabolism Nucleotide metabolism C-compound and carbohydrate metabolism ""Metabolism of vitamins cofactors |
| CA5870 | 0.9 | 1.1 | 1.0 | 1.0 | IPF345     | complemer FH1/FH2 involved in c orf19.7537     | 345 IPF345       | CELL CYCLE AND DNA PROCESSING CELL FATE SUBCELLULAR LOCALISATION                                                      |
| CA5871 | 0.7 | 0.7 | 0.8 | 0.9 | PIF2       | 17309819..DNA helicase (by hom orf19.7538      | 336 CaPIF2       | CELL CYC DNA binding,helicase activity                                                                                |
| CA5872 | 0.7 | 1.0 | 1.3 | 1.0 | IPF333     | complemer unknown function orf19.7539          | 333 IPF333       | No significant S.c. match                                                                                             |
| CA5873 | 1.6 | 1.1 | 1.0 | 1.0 | IPF331     | 17314831..GPI-anchored cell surf orf19.7542    | 331 IPF331       | No significant S.c. match                                                                                             |
| CA5874 | 1.5 | 1.0 | 1.0 | 0.8 | CTA23      | complemer transcriptional activatio orf19.7544 | 328 CaCTA23      | No significant S.c. match                                                                                             |
| CA5875 | 1.0 | 1.1 | 2.0 | 1.1 | IPF324.3   | 17319171..unknown function, , 3-p orf19.7545   | 324 IPF324.3     | No significant S.c. match                                                                                             |
| CA5876 | 1.8 | 1.3 | 1.1 | 1.1 | IPF12082.5 | 17327332..bumetanide-sensitive t orf19.6833    | 12082 IPF12082.5 | REGULATI transporter activity                                                                                         |
| CA5877 | 1.5 | 0.9 | 1.2 | 1.2 | IPF12082.5 | 17329088..bumetanide-sensitive t orf19.6832    | 12080 IPF12082.5 | REGULATION OF/ INTERACTION WITH CELLULAR ENVIRONMENT TRANSPORT FACILITATION                                           |
| CA5878 | 1.3 | 1.6 | 1.2 | 1.2 | PRP5       | 17331400..pre-mRNA processing orf19.6831       | 12079 CaPRP5     | TRANSCR RNA binding,helicase activity                                                                                 |
| CA5879 | 0.9 | 1.0 | 0.9 | 1.1 | IPF12076   | 17334373..enoyl CoA hydratase (l orf19.6830    | 12076 IPF12076   | CLASSIFICATION NOT YET CLEAR-CUT                                                                                      |
| CA5880 | 1.5 | 1.0 | 1.1 | 0.9 | IPF12074   | 17335442..unknown function orf19.6829          | 12074 IPF12074   | Phosphate molecular_function unknown                                                                                  |
| CA5881 | 0.8 | 1.0 | 1.0 | 1.0 | SSS1       | 17337707..ER protein-translocase complex sub   | 2429 CaSSS1      | PROTEIN  transporter activity                                                                                         |
| CA5882 | 0.9 | 1.2 | 0.9 | 1.1 | RRP1       | 17338576..Involved in processing orf19.6828    | 20032 CaRRP1     | TRANSCR molecular_function unknown                                                                                    |
| CA5883 | 0.4 | 1.1 | 0.9 | 0.9 | IPF2425    | 17339844..unknown function orf19.6827          | 2425 IPF2425     | TRANSCR protein binding                                                                                               |
| CA5884 | 1.0 | 1.0 | 0.9 | 0.9 | SLF1       | complemer Copper homeostasis p orf19.6826      | 2424 CaSLF1      | PROTEIN  RNA binding                                                                                                  |
| CA5885 | 0.8 | 1.4 | 1.1 | 1.1 | IPF2419    | 17345064..unknown function orf19.6824          | 2419 IPF2419     | No significant S.c. match                                                                                             |
| CA5886 | 1.0 | 0.9 | 1.0 | 1.1 | IPF2417    | complemer unknown function orf19.6822          | 2417 IPF2417     | UNCLASSI molecular_function unknown                                                                                   |
| CA5887 | 0.7 | 1.0 | 1.0 | 0.8 | IPF2415    | 17348282..similar to Saccharomy orf19.6821     | 2415 IPF2415     | CELL CYC protein binding                                                                                              |
| CA5888 | 1.1 | 1.0 | 1.1 | 1.1 | IPF2414    | complemer unknown function orf19.6820          | 2414 IPF2414     | TRANSCRIPTION                                                                                                         |
| CA5889 | 0.9 | 1.0 | 1.2 | 0.9 | IPF2409    | complemer RNA-dependent ATPa orf19.6818        | 2409 IPF2409     | CLASSIFI Chelicase activity                                                                                           |
| CA5890 | 1.2 | 1.0 | 1.6 | 1.0 | FCR1       | 17364525..Zinc cluster transcripti orf19.6817  | 2404 CaFCR1      | TRANSCRIPTION                                                                                                         |
| CA5891 | 1.2 | 1.2 | 1.1 | 1.3 | IPF2400    | complemer putative aldehyde redu orf19.6816    | 2400 IPF2400     | C-compour oxidoreductase activity                                                                                     |
| CA5892 | 0.2 | 0.6 | 0.8 | 0.6 | GAP1       | 17370939..Glyceraldehyde-3-phos orf19.6814     | 2397 CaGAP1      | C-compour oxidoreductase activity                                                                                     |
| CA5893 | 0.7 | 1.0 | 0.8 | 1.1 | IPF2392    | 17372227..unknown function orf19.6813          | 2392 IPF2392     | No significant S.c. match                                                                                             |
| CA5894 | 0.5 | 0.6 | 0.6 | 0.9 | PMT2       | 17373364..O-D-mannosyltransfer orf19.6812      | 2391 CaPMT2      | C-compour transferase activity                                                                                        |
| CA5895 | 1.1 | 0.9 | 1.2 | 0.9 | ISA2       | 17376082..Mitochondrial protein r orf19.6811   | 2389 CaISA2      | REGULATI molecular_function unknown                                                                                   |
| CA5896 | 1.2 | 0.9 | 1.1 | 1.3 | TPD3       | complemer Ser/thr protein phosph orf19.6810    | 2388 CaTPD3      | CELL CYC protein phosphatase activity                                                                                 |
| CA5897 | 1.5 | 0.9 | 0.9 | 1.0 | IPF2384    | 17380149..unknown function orf19.6809          | 2384 IPF2384     | ENERGY  molecular_function unknown                                                                                    |
| CA5898 | 1.8 | 1.4 | 1.1 | 1.1 | IPF2383    | complemer unknown function orf19.6808          | 2383 IPF2383     | No significant S.c. match                                                                                             |
| CA5899 | 3.5 | 1.0 | 1.8 | 0.9 | IPF2382    | 17381350..unknown function orf19.6807          | 2382 IPF2382     | PROTEIN FATE [folding modification destination] ""CELLULAR TRANSPORT AND TRANSPORT MECHANISMS                         |
| CA5900 | 1.2 | 2.3 | 0.9 | 1.3 | IPF2379    | complemer unknown function orf19.6806          | 2379 IPF2379     | No significant S.c. match                                                                                             |
| CA5901 | 0.9 | 0.8 | 1.2 | 1.1 | IPF2374    | 17388033..unknown function orf19.6805          | 2374 IPF2374     | UNCLASSI molecular_function unknown                                                                                   |
| CA5902 | 0.7 | 1.1 | 1.0 | 1.0 | SRP68      | 17391904..SIGNAL RECOGNITIC orf19.6804         | 5941 CaSRP68     | PROTEIN FATE [folding modification destination] ""SUBCELLULAR LOCALISATION                                            |

|        |     |     |     |     |           |                                                |       |           |                                                                                                                   |
|--------|-----|-----|-----|-----|-----------|------------------------------------------------|-------|-----------|-------------------------------------------------------------------------------------------------------------------|
| CA5903 | 0.9 | 0.8 | 0.7 | 1.1 | IPF5942   | 17393983..transmembrane sugar orf19.6803       | 5942  | IPF5942   | UNCLASSI transporter activity                                                                                     |
| CA5904 | 0.8 | 1.0 | 1.1 | 0.9 | IPF5944   | 17395480..Unknown function orf19.6802          | 5944  | IPF5944   | UNCLASSI molecular_function unknown                                                                               |
| CA5905 | 1.2 | 0.8 | 0.7 | 1.1 | RPD32     | 17396909..histone deacetylase B orf19.6801     | 5946  | CaRPD32   | Phosphate hydrolase activity                                                                                      |
| CA5906 | 0.8 | 1.0 | 0.9 | 0.9 | IPF5949   | 17399353..unknown function orf19.6800          | 5949  | IPF5949   | UNCLASSIFIED PROTEINS                                                                                             |
| CA5907 | 1.2 | 0.9 | 1.0 | 1.4 | SSN6      | 17404006..transcriptional repressorf19.6798    | 5957  | CaSSN6    | TRANSCR transcription regulator activity                                                                          |
| CA5908 | 1.0 | 0.8 | 1.2 | 1.0 | IPF5960   | complemer unknown function orf19.6797          | 5960  | IPF5960   | No significant S.c. match                                                                                         |
| CA5909 | 1.1 | 0.9 | 1.0 | 1.1 | YSA1      | complemer sugar-nucleotide hydrc orf19.6796    | 5962  | CaYSA1    | Nucleotide hydrolase activity                                                                                     |
| CA5910 | 0.6 | 1.0 | 1.0 | 0.9 | IPF5964   | 17411494..unknown function orf19.6795          | 5964  | IPF5964   | No significant S.c. match                                                                                         |
| CA5911 | 1.2 | 1.6 | 1.4 | 1.4 | IPF5965   | 17412612..NADH-ubiquinone oxid orf19.6794      | 5965  | IPF5965   | No significant S.c. match                                                                                         |
| CA5912 | 0.5 | 1.6 | 1.6 | 1.0 | IPF5966   | complemer unknown function orf19.6793          | 5966  | IPF5966   | No significant S.c. match                                                                                         |
| CA5913 | 0.8 | 1.2 | 0.9 | 1.0 | RRD1      | 17416297..Phosphotyrosyl phosph orf19.6792     | 10731 | CaRRD1    | CELL CYC protein phosphatase activity                                                                             |
| CA5914 | 1.8 | 3.5 | 3.0 | 1.8 | HHT3      | 17418335..histone H3 orf19.6791                | 10733 | CaHHT3    | TRANSCRIPTION SUBCELLULAR LOCALISATION                                                                            |
| CA5915 | 1.1 | 1.0 | 1.1 | 1.0 | IPF10735  | complemer similar to Saccharomy orf19.6790     | 10735 | IPF10735  | TRANSCR RNA binding                                                                                               |
| CA5916 | 0.8 | 0.9 | 0.9 | 0.9 | IPF19818  | 17424240..similar to Saccharomy orf19.6789     | 19818 | IPF19818  | CELL CYC structural molecule activity                                                                             |
| CA5917 | 0.9 | 0.8 | 1.0 | 0.8 | IPF8923   | 17428344..unknown function orf19.6788          | 8923  | IPF8923   | CELLULAR TRANSPORT AND TRANSPORT MECHANISMS SUBCELLULAR LOCALISATION                                              |
| CA5918 | 0.4 | 0.6 | 0.9 | 1.0 | ERV14     | 17429739..membrane protein orf19.6787          | 8924  | CaERV14   | CELLULAF molecular_function unknown                                                                               |
| CA5919 | 0.9 | 0.9 | 0.9 | 0.8 | IPF8926.3 | complemer unknown function, 3-pr orf19.6786    | 8926  | IPF8926.3 | No significant S.c. match                                                                                         |
| CA5920 | 0.2 | 0.2 | 0.6 | 0.8 | RPS12     | complemer acidic ribosomal protei orf19.6785   | 8927  | CaRPS12   | PROTEIN 'structural molecule activity                                                                             |
| CA5921 | 0.9 | 1.1 | 0.9 | 1.0 | IPF8930   | 17433971..unknown function orf19.6784          | 8930  | IPF8930   | No significant S.c. match                                                                                         |
| CA5922 | 2.0 | 1.1 | 1.1 | 0.9 | MRS6      | complemer geranylgeranyltransfer orf19.6783    | 8931  | CaMRS6    | Lipid fatty-εenzyme regulator activity                                                                            |
| CA5923 | 1.4 | 0.9 | 0.9 | 0.7 | IFQ2      | complemer Unknown function orf19.6782          | 2825  | CaIFQ2    | No significant S.c. match                                                                                         |
| CA5924 | 0.9 | 1.1 | 1.0 | 1.1 | IPF2822   | complemer unknown function orf19.6781          | 2822  | IPF2822   | No significant S.c. match                                                                                         |
| CA5925 | 1.9 | 1.3 | 1.1 | 1.0 | MET8      | 17448528..Siroheme synthase (b) orf19.6780     | 2818  | CaMET8    | Amino acid lyase activity                                                                                         |
| CA5926 | 0.7 | 0.9 | 1.0 | 1.0 | PRO2      | complemer Proline biosynthetic en orf19.6779   | 2817  | CaPRO2    | Amino acid oxidoreductase activity                                                                                |
| CA5927 | 2.0 | 1.2 | 1.2 | 1.1 | DRS22     | 17451300..Membrane-spanning Corf19.6778        | 2816  | CaDRS22   | CELLULAF hydrolase activity                                                                                       |
| CA5928 | 0.9 | 1.0 | 1.3 | 0.8 | IPF2815   | 17456300..unknown function orf19.6777          | 2815  | IPF2815   | No significant S.c. match                                                                                         |
| CA5929 | 1.0 | 1.2 | 1.1 | 1.1 | GCD2      | 17457337..Translation initiation fa orf19.6776 | 2813  | CaGCD2    | PROTEIN 'translation regulator activity                                                                           |
| CA5930 | 1.1 | 1.2 | 1.2 | 1.0 | ECM29.EX  | complemer Involved in cell wall bic orf19.6773 | 2810  | CaECM29   | CONTROL OF CELLULAR ORGANIZATION UNCLASSIFIED PROTEINS                                                            |
| CA5931 | 1.2 | 1.0 | 1.1 | 0.8 | ECM29.EX  | complemer Involved in cell wall bic orf19.6772 | 2807  | CaECM29   | CONTROL OF CELLULAR ORGANIZATION UNCLASSIFIED PROTEINS                                                            |
| CA5932 | 1.2 | 0.9 | 0.9 | 0.8 | UBI4      | complemer Polyubiquitin orf19.6771             | 2805  | CaUBI4    | No significant S.c. match                                                                                         |
| CA5933 | 0.8 | 1.1 | 1.0 | 1.0 | IPF2804   | complemer unknown function orf19.6770          | 2804  | IPF2804   | UNCLASSI protein binding                                                                                          |
| CA5934 | 1.1 | 1.2 | 1.4 | 1.2 | IPF2802   | 17469283..unknown function orf19.6769          | 2802  | IPF2802   | UNCLASSI molecular_function unknown                                                                               |
| CA5935 | 1.7 | 1.1 | 1.3 | 0.9 | IPF2798   | 17471697..unknown function orf19.6766          | 2798  | IPF2798   | TRANSCR RNA binding                                                                                               |
| CA5936 | 1.3 | 1.9 | 1.4 | 2.1 | IPF2795   | complemer unknown function orf19.6763          | 2795  | IPF2795   | CELL CYCLE AND DNA PROCESSING                                                                                     |
| CA5937 | 1.1 | 1.2 | 1.0 | 1.2 | IPF2784   | 17479036..unknown function orf19.6760          | 2784  | IPF2784   | CELL FATI molecular_function unknown                                                                              |
| CA5938 | 1.4 | 1.2 | 1.1 | 1.1 | IPF3481   | 17481199..unknown function orf19.6759          | 3482  | IPF3481   | CELL FATE                                                                                                         |
| CA5939 | 0.9 | 1.2 | 0.9 | 1.1 | IPF3484   | 17483668..aldo/keto reductase (b) orf19.6758   | 3484  | IPF3484   | C-compound and carbohydrate metabolism SUBCELLULAR LOCALISATION                                                   |
| CA5940 | 1.3 | 1.0 | 1.1 | 0.7 | IPF3485   | 17484974..aldo/keto reductase (b) orf19.6757   | 3485  | IPF3485   | C-compour oxidoreductase activity                                                                                 |
| CA5941 | 0.3 | 1.0 | 0.9 | 0.9 | IPF3486   | 17486121..unknown function orf19.6756          | 3486  | IPF3486   | UNCLASSI enzyme regulator activity                                                                                |
| CA5942 | 0.8 | 0.9 | 1.0 | 1.0 | DLD2      | 17487290..D-lactate ferrycytochro orf19.6755   | 3488  | CaDLD2    | C-compour oxidoreductase activity                                                                                 |
| CA5943 | 0.7 | 1.2 | 0.9 | 1.0 | IPF3490   | 17489734..unknown function orf19.6754          | 3490  | IPF3490   | No significant S.c. match                                                                                         |
| CA5944 | 0.9 | 0.9 | 1.0 | 1.1 | IPF3491   | 17490890..unknown function orf19.6753          | 3491  | IPF3491   | UNCLASSI molecular_function unknown                                                                               |
| CA5945 | 1.0 | 0.8 | 0.9 | 1.1 | IPF3492   | complemer unknown function orf19.6752          | 3492  | IPF3492   | PROTEIN 'structural molecule activity                                                                             |
| CA5946 | 0.7 | 0.9 | 1.3 | 0.9 | IPF3493   | 17492307..unknown function orf19.6751          | 3493  | IPF3493   | TRANSCR transferase activity                                                                                      |
| CA5947 | 1.0 | 0.8 | 1.1 | 1.1 | KRS1      | complemer Lysyl-tRNA synthetase orf19.6749     | 3495  | CaKRS1    | PROTEIN 'ligase activity                                                                                          |
| CA5948 | 0.7 | 1.2 | 0.8 | 1.0 | IPF3496   | 17495321..unknown function orf19.6748          | 3496  | IPF3496   | No significant S.c. match                                                                                         |
| CA5949 | 0.8 | 1.1 | 1.4 | 1.0 | IPF3498   | 17496843..unknown function orf19.6747          | 3498  | IPF3498   | UNCLASSI molecular_function unknown                                                                               |
| CA5950 | 0.4 | 0.9 | 0.6 | 0.4 | TP11      | 17498034..Triose phosphate isom orf19.6745     | 3499  | CaTP11    | C-compour isomerase activity                                                                                      |
| CA5951 | 0.5 | 1.0 | 1.2 | 1.0 | IPF3500   | complemer unknown function orf19.6744          | 3500  | IPF3500   | CELL CYC molecular_function unknown                                                                               |
| CA5952 | 0.9 | 0.9 | 1.2 | 1.0 | IPF3503   | 17500349..similar to Saccharomy orf19.6742     | 3503  | IPF3503   | TRANSCR protein phosphatase activity                                                                              |
| CA5953 | 0.7 | 0.5 | 0.9 | 0.8 | IPF3506   | 17503763..unknown function orf19.6741          | 3506  | IPF3506   | UNCLASSIFIED PROTEINS                                                                                             |
| CA5954 | 0.9 | 1.1 | 1.3 | 1.1 | IPF3508   | 17505368..unknown function orf19.6740          | 3508  | IPF3508   | TRANSCR RNA binding                                                                                               |
| CA5955 | 0.9 | 1.1 | 0.9 | 0.9 | IPF3510   | 17506855..unknown function orf19.6739          | 3510  | IPF3510   | C-compour molecular_function unknown                                                                              |
| CA5956 | 0.8 | 1.1 | 0.8 | 1.1 | VAN1      | 17509387..Vanadate resistance p orf19.6738     | 3512  | CaVAN1    | CELL CYC transferase activity                                                                                     |
| CA5957 | 0.9 | 1.1 | 0.8 | 1.1 | RRP3.3EO  | 17511492..RNA-dependent ATPa orf19.7546        | 17103 | CaRRP3.3  | TRANSCR RNA binding,helicase activity                                                                             |
| CA5958 | 1.3 | 0.9 | 1.0 | 0.8 | PIB1      | complemer phosphatidylinositol(3) orf19.7547   | 17102 | CaPIB1    | Lipid fatty-ε ligase activity                                                                                     |
| CA5959 | 1.2 | 1.1 | 1.0 | 0.9 | SRB7      | 17514692..DNA-directed RNA pol orf19.7548      | 12936 | CaSRB7    | TRANSCR transcription regulator activity                                                                          |
| CA5960 | 0.8 | 1.0 | 1.0 | 1.1 | PMT5      | complemer protein mannosyltransf orf19.7549    | 12934 | CaPMT5    | C-compound and carbohydrate metabolism ""PROTEIN FATE [folding modification destination] ""SUBCELLULAR LOCALISATI |
| CA5961 | 1.1 | 0.9 | 1.0 | 0.8 | IFA14     | complemer unknown function orf19.7550          | 12930 | CaIFA14   | No significant S.c. match                                                                                         |
| CA5962 | 1.1 | 0.5 | 1.0 | 0.9 | ALO1      | 17532037..D-arabinono-1,4-lactor orf19.7551    | 967   | CaALO1    | C-compour oxidoreductase activity                                                                                 |
| CA5963 | 1.4 | 0.9 | 1.0 | 0.8 | IPF966    | complemer unknown function orf19.7552          | 966   | IPF966    | UNCLASSI RNA binding                                                                                              |
| CA5964 | 0.8 | 0.9 | 1.1 | 1.1 | IPF963    | 17537148..unknown function orf19.7553          | 963   | IPF963    | No significant S.c. match                                                                                         |
| CA5965 | 1.3 | 0.9 | 1.0 | 0.8 | IPF961    | 17538370..drug resistance protein orf19.7554   | 961   | IPF961    | CELL RESCUE DEFENSE AND VIRULENCE ""TRANSPORT FACILITATION                                                        |
| CA5966 | 0.8 | 1.1 | 1.1 | 1.1 | IPF959    | complemer unknown function orf19.7556          | 959   | IPF959    | No significant S.c. match                                                                                         |
| CA5967 | 1.1 | 1.2 | 1.4 | 0.9 | IPF955    | 17542095..member of the AAA A1 orf19.7558      | 955   | IPF955    | PROTEIN 'molecular_function unknown                                                                               |
| CA5968 | 0.8 | 0.6 | 1.0 | 1.2 | IPF946    | 17547457..unknown function orf19.7561          | 946   | IPF946    | No significant S.c. match                                                                                         |
| CA5969 | 0.9 | 0.9 | 1.0 | 0.9 | BET2      | complemer beta subunit of geranyl orf19.7563   | 941   | CaBET2    | Lipid fatty-ε transferase activity                                                                                |
| CA5970 | 0.9 | 1.0 | 1.1 | 0.8 | DPB2      | complemer DNA-directed DNA pol orf19.7564      | 940   | CaDPB2    | CELL CYC nucleotidyltransferase activity                                                                          |
| CA5971 | 1.2 | 1.0 | 1.3 | 1.2 | GNP2      | 17560024..high affinity glutamine orf19.7565   | 937   | CaGNP2    | Amino acid metabolism TRANSPORT FACILITATION                                                                      |
| CA5972 | 2.2 | 0.8 | 1.4 | 1.0 | GNP1      | 17564170..high affinity glutamine orf19.7566   | 934   | CaGNP1    | Amino acid metabolism TRANSPORT FACILITATION                                                                      |
| CA5973 | 0.9 | 0.8 | 1.1 | 1.0 | IPF931    | 17566719..unknown function orf19.7567          | 931   | IPF931    | UNCLASSI molecular_function unknown                                                                               |

|        |     |     |     |     |           |                                      |             |               |                                                                                                          |
|--------|-----|-----|-----|-----|-----------|--------------------------------------|-------------|---------------|----------------------------------------------------------------------------------------------------------|
| CA5974 | 1.4 | 0.8 | 1.2 | 1.1 | IPF930    | 17568313..unknown function           | orf19.7568  | 930 IPF930    | CELL FATI molecular_function unknown                                                                     |
| CA5975 | 0.7 | 1.2 | 1.1 | 0.9 | SIK1      | complemer nucleolar protein invol    | orf19.7569  | 929 CaSIK1    | TRANSCR molecular_function unknown                                                                       |
| CA5976 | 1.5 | 1.5 | 1.1 | 0.9 | IPF928    | complemer zinc-finger transcription  | orf19.7570  | 928 IPF928    | Nitrogen ar transcription regulator activity                                                             |
| CA5977 | 1.1 | 0.9 | 0.8 | 1.0 | UBC4.3    | 17575390..E2 ubiquitin-conjugatin    | orf19.7571  | 926 CaUBC4.3  | PROTEIN FATE [folding modification destination] ""CELLULAR TRANSPORT AND TRANSPORT MECHANISMS ""CELL RES |
| CA5978 | 0.5 | 1.1 | 1.1 | 1.1 | SPT7      | 17576602..transcription factor, me   | orf19.7572  | 925 CaSPT7    | TRANSCR structural molecule activity                                                                     |
| CA5979 | 1.1 | 1.2 | 1.0 | 1.0 | IPF921    | 17581159..BTB domain and Anka        | orf19.7574  | 921 IPF921    | TRANSCRIPTION CELLULAR TRANSPORT AND TRANSPORT MECHANISMS CELL FATE SUBCELLULAR LOCALISATION             |
| CA5980 | 1.0 | 1.0 | 1.1 | 1.2 | IPF918    | complemer unknown function           | orf19.7576  | 918 IPF918    | No significant S.c. match                                                                                |
| CA5981 | 0.8 | 1.1 | 1.1 | 1.0 | MSS51     | complemer involved in maturation     | orf19.7577  | 917 CaMSS51   | PROTEIN t molecular_function unknown                                                                     |
| CA5982 | 0.3 | 1.0 | 0.8 | 0.9 | IPF915    | complemer unknown function           | orf19.7578  | 915 IPF915    | SUBCELLL transporter activity                                                                            |
| CA5983 | 0.5 | 0.7 | 0.8 | 0.9 | IPF913    | 17589318..unknown function           | orf19.7579  | 913 IPF913    | No significant S.c. match                                                                                |
| CA5984 | 1.2 | 0.9 |     | 1.1 | CUS1      | 17591992..spliceosome associate      | orf19.7581  | 911 CaCUS1    | TRANSCR protein binding,RNA binding                                                                      |
| CA5985 | 1.5 | 1.2 | 1.0 | 0.8 | IPF907    | complemer unknown function           | orf19.7583  | 907 IPF907    | Lipid fatty-acid and isoprenoid metabolism ""TRANSCRIPTION SUBCELLULAR LOCALISATION                      |
| CA5986 | 1.0 | 1.2 | 0.9 | 0.9 | INO1      | complemer myo-inositol-1-phosphor    | orf19.7585  | 904 CaINO1    | C-compour isomerase activity                                                                             |
| CA5987 | 0.9 | 0.8 | 1.0 | 1.0 | CHT3      | 17603077..chitinase 3 precursor      | orf19.7586  | 696 CaCHT3    | C-compour hydrolase activity                                                                             |
| CA5988 | 1.0 | 0.8 | 1.0 | 1.1 | IPF693    | complemer unknown function           | orf19.7588  | 693 IPF693    | UNCLASSI molecular_function unknown                                                                      |
| CA5989 | 1.1 | 0.9 |     | 1.3 | IPF692    | 17605943..unknown function           | orf19.7589  | 692 IPF692    | No significant S.c. match                                                                                |
| CA5990 | 2.3 | 2.4 | 1.5 | 0.9 | IPF690.5F | 17607238..NADH dehydrogenase         | orf19.7590  | 690 IPF690.5f | No significant S.c. match                                                                                |
| CA5991 | 1.9 | 1.0 | 1.4 | 1.0 | IPF690.3F | 17607789..NADH dehydrogenase         | orf19.7591  | 689 IPF690.3f | No significant S.c. match                                                                                |
| CA5992 | 8.8 | 5.9 | 5.2 | 1.4 | FAA4      | 17613862..long-chain fatty acid--    | Corf19.7592 | 20033 CaFAA4  | Lipid fatty-ε ligase activity                                                                            |
| CA5993 | 2.2 | 1.3 | 1.3 | 1.2 | ASP1      | complemer L-asparaginase (by ho      | orf19.7593  | 679 CaASP1    | Amino acid hydrolase activity                                                                            |
| CA5994 | 1.1 | 1.0 | 0.9 | 1.1 | IPF677    | 17618102..unknown function           | orf19.7594  | 677 IPF677    | No significant S.c. match                                                                                |
| CA5995 | 0.6 | 1.0 | 0.7 | 1.0 | IPF676    | complemer unknown function           | orf19.7595  | 676 IPF676    | No significant S.c. match                                                                                |
| CA5996 | 1.2 | 0.9 | 1.0 | 0.9 | IPF673    | 17620784..unknown function           | orf19.7596  | 673 IPF673    | ENERGY                                                                                                   |
| CA5998 | 1.0 | 1.0 | 1.1 | 1.1 | IPF670    | 17622301..unknown function           | orf19.7598  | 670 IPF670    | PROTEIN f molecular_function unknown                                                                     |
| CA5999 | 1.2 | 1.1 | 1.0 | 0.9 | IPF668    | 17625718..unknown function           | orf19.7599  | 668 IPF668    | UNCLASSI RNA binding                                                                                     |
| CA6000 | 0.3 | 0.6 | 0.5 | 1.0 | FDH11.3   | complemer glutathione-dependent      | orf19.7600  | 666 CaFDH11.3 | C-compour oxidoreductase activity                                                                        |
| CA6001 | 0.8 | 1.0 | 1.3 | 0.9 | IPF662    | 17629811..unknown function           | orf19.7601  | 662 IPF662    | UNCLASSI transferase activity                                                                            |
| CA6002 | 0.6 | 0.8 | 0.8 | 1.0 | IPF661    | complemer unknown function           | orf19.7602  | 661 IPF661    | UNCLASSI enzyme regulator activity                                                                       |
| CA6003 | 0.7 | 1.1 | 1.0 | 0.9 | IPF660    | 17632391..unknown function           | orf19.7603  | 660 IPF660    | UNCLASSI molecular_function unknown                                                                      |
| CA6005 | 0.7 | 1.2 | 1.0 | 1.0 | PUP1      | complemer 20S proteasom ebeta2       | orf19.7605  | 654 CaPUP1    | PROTEIN f peptidase activity                                                                             |
| CA6006 | 1.1 | 1.0 |     | 1.0 | IPF652    | 17638868..unknown function           | orf19.7606  | 652 IPF652    | No significant S.c. match                                                                                |
| CA6007 | 1.3 | 1.2 |     | 1.2 | IPF650    | 17640920..unknown function           | orf19.7608  | 650 IPF650    | No significant S.c. match                                                                                |
| CA6008 | 0.7 | 1.0 | 0.8 | 1.0 | IPF647    | 17642972..unknown function           | orf19.7609  | 647 IPF647    | No significant S.c. match                                                                                |
| CA6009 | 0.7 | 0.3 | 0.7 | 0.9 | IPF643    | 17648191..similar to Saccharomy      | orf19.7610  | 643 IPF643    | CELL CYC protein phosphatase activity                                                                    |
| CA6010 | 0.3 | 0.4 | 0.8 | 0.7 | TRX1      | complemer thioredoxin (by homolo     | orf19.7611  | 640 CaTRX1    | CELL CYC oxidoreductase activity                                                                         |
| CA6011 | 0.8 | 1.0 | 1.0 | 1.0 | CTM1      | complemer cytochrome c methyltr      | orf19.7612  | 639 CaCTM1    | PROTEIN f transferase activity                                                                           |
| CA6012 | 1.1 | 1.2 | 1.1 | 1.2 | HCR1      | 17655504..putative translation init  | orf19.7613  | 638 CaHCR1    | TRANSCR translation regulator activity                                                                   |
| CA6013 | 0.7 | 1.2 | 0.9 | 0.9 | IPF635    | complemer unknown function           | orf19.7614  | 635 IPF635    | No significant S.c. match                                                                                |
| CA6014 | 0.8 | 1.0 | 1.1 | 1.0 | TRS31     | 17657803..targeting complex (TR      | orf19.7615  | 634 CaTRS31   | CELLULAF molecular_function unknown                                                                      |
| CA6015 | 0.8 | 1.2 | 0.9 | 1.1 | ARD1      | 17658711..protein N-acetyltransfe    | orf19.7617  | 631 CaARD1    | Lipid fatty-ε transferase activity                                                                       |
| CA6016 | 0.8 | 1.3 | 0.9 | 1.0 | IPF630    | complemer unknown function           | orf19.7618  | 630 IPF630    | UNCLASSI chaperone activity                                                                              |
| CA6017 | 1.1 | 1.3 | 0.8 | 1.1 | IPF629    | 17661145..unknown function           | orf19.7619  | 629 IPF629    | UNCLASSIFIED PROTEINS                                                                                    |
| CA6018 | 1.4 | 1.0 | 0.8 | 0.9 | IPF627    | complemer unknown function           | orf19.7620  | 627 IPF627    | TRANSCR molecular_function unknown                                                                       |
| CA6019 | 0.9 | 0.9 | 1.0 | 0.8 | IPF625    | 17664248..unknown function           | orf19.7621  | 625 IPF625    | UNCLASSI molecular_function unknown                                                                      |
| CA6020 | 1.3 | 1.1 | 0.9 | 0.8 | SPT3      | complemer transcription factor       | orf19.7622  | 624 CaSPT3    | TRANSCR transcription regulator activity                                                                 |
| CA6021 | 1.0 | 0.8 | 0.9 | 0.9 | BFR2      | complemer involved in protein tran   | orf19.7624  | 621 CaBFR2    | CELLULAF molecular_function unknown                                                                      |
| CA6022 | 1.1 | 0.8 | 0.9 | 0.9 | IPF618    | 17670702..GPI-anchored cell surf     | orf19.7625  | 618 IPF618    | No significant S.c. match                                                                                |
| CA6023 | 0.9 | 1.0 | 1.2 | 1.1 | CDC33     | 17671599..translation initiation fac | orf19.7626  | 616 CaCDC33   | PROTEIN t translation regulator activity                                                                 |
| CA6024 | 1.0 | 1.4 | 1.0 | 1.6 | IPF615    | complemer unknown function           | orf19.7627  | 615 IPF615    | CELL FATI molecular_function unknown                                                                     |
| CA6025 | 0.8 | 0.9 | 1.0 | 0.9 | IPF614    | 17673364..unknown function           | orf19.7629  | 614 IPF614    | UNCLASSI molecular_function unknown                                                                      |
| CA6026 | 1.3 | 0.9 | 1.0 | 0.9 | IPF610    | complemer unknown function           | orf19.7631  | 610 IPF610    | UNCLASSI DNA binding                                                                                     |
| CA6027 | 0.9 | 0.9 | 0.7 | 1.2 | IPF609    | 17677515..unknown function           | orf19.7632  | 609 IPF609    | TRANSCRIPTION SUBCELLULAR LOCALISATION                                                                   |
| CA6028 | 0.7 | 1.1 | 0.9 | 1.1 | IPF607    | complemer unknown function           | orf19.7634  | 607 IPF607    | CELL CYC molecular_function unknown                                                                      |
| CA6029 | 1.1 | 1.3 | 1.3 | 1.0 | DRS1      | 17682130..ATP dependent RNA h        | orf19.7635  | 603 CaDRS1    | TRANSCR RNA binding,helicase activity                                                                    |
| CA6030 | 1.3 | 1.0 | 1.0 | 0.9 | YHB2      | complemer flavohemoprotein (by h     | orf19.7637  | 599 CaYHB2    | CELL RESCUE DEFENSE AND VIRULENCE ""SUBCELLULAR LOCALISATION                                             |
| CA6031 | 1.9 | 1.1 | 1.1 | 0.9 | PRO1      | 17687109..glutamate 5-kinase (by     | orf19.7638  | 597 CaPRO1    | Amino acid transferase activity                                                                          |
| CA6032 | 0.8 | 1.2 | 1.1 | 1.0 | IPF596    | 17688451..similar to Saccharomy      | orf19.7642  | 596 IPF596    | PROTEIN f molecular_function unknown                                                                     |
| CA6033 | 0.6 | 0.8 | 1.0 | 1.1 | COQ2      | complemer para-hydroxybenzoate       | orf19.7643  | 592 CaCOQ2    | Metabolism transporter activity                                                                          |
| CA6034 | 1.2 | 1.2 | 0.9 | 1.2 | APC11     | complemer subunit of the anaphas     | orf19.7644  | 590 CaAPC11   | CELL CYC protein binding                                                                                 |
| CA6035 | 0.8 | 1.1 | 1.0 | 1.2 | BPL1      | complemer biotin holocarboxylase     | orf19.7645  | 589 CaBPL1    | Metabolism ligase activity                                                                               |
| CA6036 | 0.7 | 1.0 | 0.8 | 1.0 | IPF585    | 17694470..unknown function           | orf19.7646  | 585 IPF585    | UNCLASSI molecular_function unknown                                                                      |
| CA6037 | 1.1 | 0.9 | 1.0 | 1.0 | ERC4      | 17695567..ethionine resistance pr    | orf19.7648  | 582 CaERC4    | UNCLASSIFIED PROTEINS                                                                                    |
| CA6038 | 0.9 | 0.9 | 1.0 | 1.1 | LTV1      | 17697084..low-temperature viabili    | orf19.7650  | 579 CaLTV1    | CELL RES molecular_function unknown                                                                      |
| CA6039 | 1.2 | 1.0 | 0.8 | 1.1 | CKA1      | 17698544..casein kinase II, cataly   | orf19.7652  | 576 CaCKA1    | CELL CYC protein kinase activity                                                                         |
| CA6040 | 0.9 | 1.0 | 0.7 | 1.1 | CPR6      | 17700062..cyclophylin (by homolo     | orf19.7654  | 574 CaCPR6    | TRANSCR chaperone activity                                                                               |
| CA6041 | 0.7 | 1.4 | 1.2 | 1.0 | RPO21     | 17701754..DNA-directed RNA pol       | orf19.7655  | 572 CaRPO21   | TRANSCR nucleotidyltransferase activity                                                                  |
| CA6042 | 0.8 | 1.1 | 1.3 | 1.0 | IPF4924   | 17707077..unknown function           | orf19.7657  | 4924 IPF4924  | TRANSCR RNA binding                                                                                      |
| CA6043 | 1.2 | 0.8 | 1.0 | 1.1 | RFC4      | 17707814..DNA replication factor     | orf19.7658  | 4926 CaRFC4   | CELL CYC DNA binding                                                                                     |
| CA6044 | 0.7 | 1.1 |     | 0.9 | IPF4928   | complemer similar to Saccharomy      | orf19.7660  | 4928 IPF4928  | CELLULAF protein binding                                                                                 |
| CA6045 | 1.0 | 1.1 | 1.0 | 1.0 | IPF4929   | 17710477..similar to Saccharomy      | orf19.7661  | 4929 IPF4929  | CELL CYC DNA binding,helicase activity                                                                   |
| CA6046 | 0.8 | 1.1 | 1.2 | 0.9 | IPF4931   | complemer unknown function           | orf19.7662  | 4931 IPF4931  | TRANSPO molecular_function unknown                                                                       |

|        |     |     |     |     |           |                                     |              |       |           |                                                                                                                        |
|--------|-----|-----|-----|-----|-----------|-------------------------------------|--------------|-------|-----------|------------------------------------------------------------------------------------------------------------------------|
| CA6047 | 0.9 | 1.1 |     | 1.1 | IPF4933   | 17713493..unknown function          | orf19.7663   | 4933  | IPF4933   | CELL CYC molecular_function unknown                                                                                    |
| CA6048 | 1.0 | 0.9 | 1.0 | 1.0 | IPF4934   | complemer unknown function          | orf19.7664   | 4934  | IPF4934   | TRANSCR molecular_function unknown                                                                                     |
| CA6049 | 0.9 | 0.8 | 0.9 | 0.9 | IPF4935   | complemer unknown function          | orf19.7665   | 4935  | IPF4935   | UNCLASSI molecular_function unknown                                                                                    |
| CA6050 | 0.4 | 1.0 | 0.8 | 0.7 | IPF4939   | 17715579..similar to Saccharomy     | orf19.7666   | 4939  | IPF4939   | TRANSPORT FACILITATION                                                                                                 |
| CA6051 | 1.5 | 1.1 | 1.1 | 0.9 | IPF4940   | complemer unknown function          | orf19.7667   | 4940  | IPF4940   | C-compour hydrolase activity                                                                                           |
| CA6052 | 3.4 | 1.1 | 1.6 | 1.0 | IPF4942   | 17718141..similar to Saccharomy     | orf19.7668   | 4942  | IPF4942   | C-compour hydrolase activity                                                                                           |
| CA6053 | 1.0 | 0.8 |     | 1.3 | IPF4949   | complemer unknown function          | orf19.7670   | 4949  | IPF4949   | UNCLASSI molecular_function unknown                                                                                    |
| CA6054 | 0.7 | 0.9 | 0.9 | 1.1 | IPF4952   | complemer unknown function          | orf19.7672   | 4952  | IPF4952   | UNCLASSI molecular_function unknown                                                                                    |
| CA6055 | 0.9 | 0.9 | 1.0 | 1.0 | SMD1      | 17723811..snRNA-associated pro      | orf19.7673   | 4953  | CaSMD1    | TRANSCRIPTION SUBCELLULAR LOCALISATION                                                                                 |
| CA6056 | 0.8 | 0.8 |     | 0.8 | IPF4955   | complemer similar to Saccharomy     | orf19.7675   | 4955  | IPF4955   | No significestructural molecule activity                                                                               |
| CA6057 | 0.6 | 0.5 | 0.9 | 0.5 | IPF4959   | complemer D-xylulose reductase      | ( orf19.7676 | 4959  | IPF4959   | C-compour oxidoreductase activity                                                                                      |
| CA6058 | 0.9 | 0.5 | 1.0 | 0.9 | ATP16     | complemer F1F0-ATPase complex       | orf19.7678   | 4961  | CaATP16   | ENERGY C transporter activity                                                                                          |
| CA6059 | 0.5 | 1.0 | 0.6 | 1.1 | CTA26     | complemer transcriptional activator | orf19.7680   | 20034 | CaCTA26   | No significant S.c. match                                                                                              |
| CA6060 | 0.8 | 1.1 | 1.1 | 1.1 | IPF8301   | 17728176..unknown function          | orf19.6008   | 8301  | IPF8301   | UNCLASSI molecular_function unknown                                                                                    |
| CA6061 | 1.3 | 1.4 | 1.1 | 1.1 | IPF8302   | 17732246..unknown function          | orf19.6007   | 8302  | IPF8302   | Lipid fatty-acid and isoprenoid metabolism                                                                             |
| CA6062 | 1.4 | 1.6 | 1.3 | 1.0 | IPF8307   | 17734108..putative permease (by     | orf19.6005   | 8307  | IPF8307   | C-compound and carbohydrate metabolism                                                                                 |
| CA6063 | 1.3 | 0.9 | 1.1 | 1.0 | IPF8311   | 17738610..unknown function          | orf19.6003   | 8311  | IPF8311   | UNCLASSI molecular_function unknown                                                                                    |
| CA6064 | 0.8 | 0.4 | 0.7 | 0.7 | RPL81     | 17740884..60S ribosomal protein     | orf19.6002   | 8312  | CaRPL81   | PROTEIN 'structural molecule activity                                                                                  |
| CA6065 | 1.0 | 0.9 | 0.9 | 0.9 | SAP3      | complemer secreted aspartyl prote   | orf19.6001   | 8313  | CaSAP3    | PROTEIN FATE [folding modification destination] ""Other virulence attributes                                           |
| CA6066 | 2.4 | 3.8 | 2.7 | 1.8 | CDR1      | complemer multidrug resistance pr   | orf19.6000   | 9739  | CaCDR1    | Lipid fatty-transporter activity                                                                                       |
| CA6067 | 1.2 | 0.9 | 0.8 | 0.9 | DYN1      | 17751047..dynein heavy chain, cy    | orf19.5999   | 19819 | CaDYN1    | CELL CYC motor activity                                                                                                |
| CA6068 | 0.5 | 0.5 |     | 1.1 | RPS19A.3  | complemer ribosomal protein S19.e,  | 3-prime en   | 4849  | CaRPS19A  | PROTEIN 'structural molecule activity                                                                                  |
| CA6069 | 0.4 | 0.9 | 0.8 | 1.0 | IPF4847   | 17766009..unknown function          | orf19.5995   | 4847  | IPF4847   | UNCLASSI peptidase activity                                                                                            |
| CA6070 | 1.4 | 0.8 | 1.0 | 1.0 | IPF4842   | complemer similar to Saccharomy     | orf19.5994   | 4842  | IPF4842   | CELLULAF hydrolase activity                                                                                            |
| CA6071 | 0.8 | 0.8 | 1.2 | 0.9 | IPF4835   | complemer zinc finger protein (by   | orf19.5992   | 4835  | IPF4835   | Amino acid metabolism TRANSCRIPTION SUBCELLULAR LOCALISATION UNCLASSIFIED PROTEINS                                     |
| CA6072 | 1.2 | 0.9 | 1.1 | 1.1 | DBP10     | 17787135..Putative ATP-depende      | orf19.5991   | 6     | CaDBP10   | TRANSCR RNA binding,helicase activity                                                                                  |
| CA6073 | 0.9 | 0.9 | 0.9 | 1.0 | HRP1      | complemer Nuclear polyadenylate     | orf19.5989   | 9     | CaHRP1    | TRANSCR RNA binding                                                                                                    |
| CA6074 | 0.9 |     |     | 1.1 | IPF11     | 17792199..unknown function          | orf19.5987   | 11    | IPF11     | UNCLASSI transferase activity                                                                                          |
| CA6075 | 0.8 |     | 1.4 | 1.0 | THI4      | 17793918..Thiazole biosynthetic     | orf19.5986   | 14    | CaTHI4    | Metabolism molecular_function unknown                                                                                  |
| CA6076 | 0.7 | 0.9 | 0.9 | 1.0 | PAC10.3   | 17795269..Non-native Actin Bind     | orf19.5985   | 15    | CaPAC10.  | CELL CYC protein binding                                                                                               |
| CA6077 | 0.8 | 1.2 | 0.9 | 1.2 | IPF16     | complemer unknown function          | orf19.5984   | 16    | IPF16     | UNCLASSI molecular_function unknown                                                                                    |
| CA6079 | 0.2 | 0.3 | 0.3 | 0.7 | RPL18.EXI | 17797253..Ribosomal Protein RPL     | orf19.5982   | 20    | CaRPL18.ε | PROTEIN 'structural molecule activity                                                                                  |
| CA6080 | 1.1 | 1.0 | 0.9 | 0.8 | IPF21     | 17798643..unknown function          | orf19.5980   | 21    | IPF21     | UNCLASSIFIED PROTEINS                                                                                                  |
| CA6081 | 1.2 | 0.9 | 1.0 | 0.9 | IPF24     | complemer reductase (by homolog     | orf19.5978   | 24    | IPF24     | UNCLASSIFIED PROTEINS                                                                                                  |
| CA6082 | 1.2 | 0.9 | 1.1 | 1.1 | CEM1      | complemer 3-oxoacyl-lacyl-carrier-  | orf19.5977   | 25    | CaCEM1    | Lipid fatty-transporter activity                                                                                       |
| CA6083 | 0.9 | 0.9 | 6.0 | 1.0 | IPF26     | complemer unknown function          | orf19.5976   | 26    | IPF26     | UNCLASSI molecular_function unknown                                                                                    |
| CA6084 | 6.9 | 2.3 |     | 1.4 | IPF29     | complemer zinc finger protein (by   | orf19.5975   | 29    | IPF29     | C-compound and carbohydrate metabolism                                                                                 |
| CA6085 | 2.2 | 1.0 | 1.4 | 0.9 | IPF32     | 17809845..similar to Saccharomy     | orf19.5974   | 32    | IPF32     | SUBCELLL molecular_function unknown                                                                                    |
| CA6086 | 0.8 | 1.0 | 1.1 | 1.1 | PHB2      | complemer Mitochondrial protein,    | orf19.5973   | 33    | CaPHB2    | CELL CYC molecular_function unknown                                                                                    |
| CA6087 | 0.9 | 1.0 | 0.8 | 1.0 | YHV1      | complemer unknown function          | orf19.5971   | 36    | CaYHV1    | UNCLASSI molecular_function unknown                                                                                    |
| CA6088 | 0.8 | 1.0 | 1.1 | 0.8 | HPR5      | 17816175..ATP-dependent DNA b       | orf19.5970   | 37    | CaHPR5    | CELL CYC DNA binding,helicase activity                                                                                 |
| CA6089 | 0.8 | 0.9 | 0.9 | 0.9 | RD11      | complemer Rho GDP dissociation      | orf19.5968   | 40    | CaRD11    | CELL FAT signal transducer activity                                                                                    |
| CA6090 | 1.0 | 0.8 | 0.9 | 1.1 | IPF44     | complemer unknown function          | orf19.5967   | 44    | IPF44     | UNCLASSI molecular_function unknown                                                                                    |
| CA6091 | 1.0 | 1.4 | 1.0 | 1.5 | UFD2      | 17822692..Ubiquitin fusion degrad   | orf19.5965   | 46    | CaUFD2    | PROTEIN FATE [folding modification destination]                                                                        |
| CA6092 | 0.2 | 0.7 | 0.8 | 0.9 | RPL35.3   | complemer Ribosomal protein L35A,   | 3-prime en   | 47    | CaRPL35.: | PROTEIN 'structural molecule activity                                                                                  |
| CA6093 | 0.4 | 0.7 | 0.6 | 1.1 | ARF22     | complemer GTP-binding protein of    | orf19.5964   | 50    | CaARF22   | PROTEIN I hydrolase activity                                                                                           |
| CA6094 | 1.3 | 1.1 | 1.0 | 0.9 | IPF53     | complemer unknown function          | orf19.5963   | 53    | IPF53     | UNCLASSI molecular_function unknown                                                                                    |
| CA6095 | 3.3 | 1.7 | 2.3 | 1.1 | SNF3      | 17831851..High affinity glucose tr  | orf19.5962   | 55    | CaSNF3    | C-compour signal transducer activity                                                                                   |
| CA6096 | 1.4 | 1.6 | 0.9 | 1.1 | IPF56     | 17834497..similar to Saccharomy     | orf19.5961   | 56    | IPF56     | PROTEIN I molecular_function unknown                                                                                   |
| CA6097 | 3.4 | 1.5 | 2.0 | 1.4 | NCE102    | 17837654..secretion of proteins th  | orf19.5960   | 59    | CaNCE102  | CELLULAF molecular_function unknown                                                                                    |
| CA6098 | 1.4 | 1.3 | 0.9 | 1.3 | IPF61     | complemer unknown function          | orf19.5959   | 61    | IPF61     | PROTEIN :RNA binding                                                                                                   |
| CA6099 | 1.7 | 1.3 | 1.0 | 1.2 | CDR2      | complemer Candida albicans drug     | orf19.5958   | 63    | CaCDR2    | Lipid fatty-acid and isoprenoid metabolism """"CELL RESCUE DEFENSE AND VIRULENCE ""REGULATION OF/INTERACTIO            |
| CA6100 | 0.9 | 0.6 | 0.9 | 0.9 | IPF66     | complemer unknown function          | orf19.5956   | 66    | IPF66     | UNCLASSI molecular_function unknown                                                                                    |
| CA6101 | 1.0 | 1.1 | 0.9 | 1.0 | SPO70.3F  | complemer involved in meiosis and   | sporulation, | 68    | CaSPO70.: | CELL CYCLE AND DNA PROCESSING ""PROTEIN FATE [folding modification destination] ""SUBCELLULAR LOCALISATION             |
| CA6102 | 1.0 | 1.0 | 0.8 | 0.9 | SPO70.5F  | complemer involved in meiosis an    | orf19.5954   | 70    | CaSPO70.: | CELL FAT molecular_function unknown                                                                                    |
| CA6103 | 1.3 | 1.1 | 0.7 | 1.4 | SFP1      | complemer zinc finger protein (by   | orf19.5953   | 72    | CaSFP1    | CELL CYC DNA binding,transcription regulator activity                                                                  |
| CA6104 | 0.6 | 0.6 | 0.6 | 1.1 | IPF65     | 17856243..unknown function          | orf19.5952   | 75    | IPF65     | UNCLASSIFIED PROTEINS                                                                                                  |
| CA6105 | 1.5 | 1.0 | 1.2 | 1.1 | FAS2.5F   | 17858538..fatty-acyl-CoA synthas    | orf19.5951   | 76    | CaFAS2.5f | Lipid fatty-acid and isoprenoid metabolism """"PROTEIN FATE [folding modification destination] ""SUBCELLULAR LOCALISAT |
| CA6106 | 0.6 | 1.2 | 1.2 | 1.0 | FAS2.53F  | 17860953..fatty-acyl-CoA synthase,  | alpha chair  | 77    | CaFAS2.5: | Lipid fatty-acid and isoprenoid metabolism """"PROTEIN FATE [folding modification destination] ""SUBCELLULAR LOCALISAT |
| CA6107 | 0.8 | 0.5 | 1.1 | 0.8 | FAS2.3F   | 17861433..fatty-acyl-CoA synthas    | orf19.5949   | 80    | CaFAS2.3f | Lipid fatty-oxidoreductase activity,transferase activity                                                               |
| CA6108 | 1.4 | 1.4 | 1.2 | 1.0 | SEC7      | 17864532..Guanine nucleotide ex     | orf19.5947   | 85    | CaSEC7    | CELLULAF enzyme regulator activity                                                                                     |
| CA6109 | 1.2 | 0.9 | 1.2 | 0.9 | IPF89.3   | 17870899..unknown function, 3-prime | end          | 89    | IPF89.3   | C-compour DNA binding                                                                                                  |
| CA6110 | 1.8 | 1.3 | 1.2 | 0.9 | IPF91     | 17872156..unknown function          | orf19.5943   | 91    | IPF91     | UNCLASSI molecular_function unknown                                                                                    |
| CA6111 | 1.5 | 1.1 | 0.9 | 0.9 | IPF96     | complemer C3HC4 type zinc finge     | orf19.5942   | 96    | IPF96     | UNCLASSI molecular_function unknown                                                                                    |
| CA6112 | 0.7 | 0.8 | 1.0 | 0.9 | IPF97     | 17875727..unknown function          | orf19.5941   | 97    | IPF97     | CELLULAF molecular_function unknown                                                                                    |
| CA6113 | 1.3 | 1.1 | 1.0 | 0.8 | IPF100.3  | 17877348..zinc finger protein, 3-pi | orf19.5940   | 100   | IPF100.3  | Amino acid metabolism TRANSCRIPTION SUBCELLULAR LOCALISATION UNCLASSIFIED PROTEINS                                     |
| CA6114 | 1.3 | 1.2 | 1.0 | 0.9 | SEN1      | 17879931..positive effector of tRN  | orf19.5938   | 110   | CaSEN1    | TRANSCR RNA binding,helicase activity                                                                                  |
| CA6115 | 1.1 | 1.0 | 0.8 | 1.2 | IPF112    | complemer unknown function          | orf19.5935   | 112   | IPF112    | CELL CYCLE AND DNA PROCESSING SUBCELLULAR LOCALISATION                                                                 |
| CA6116 | 0.9 | 1.1 | 1.0 | 1.0 | TOP3      | 17888645..DNA topoisomerase III     | orf19.5934   | 116   | CaTOP3    | CELL CYC isomerase activity                                                                                            |
| CA6117 | 0.8 | 1.0 | 0.9 | 1.1 | IPF122    | 17893301..unknown function          | orf19.5933   | 122   | IPF122    | No significant S.c. match                                                                                              |
| CA6118 | 1.1 | 1.1 |     | 0.9 | IPF126    | 17895351..unknown function          | orf19.5932   | 126   | IPF126    | UNCLASSI molecular_function unknown                                                                                    |

|        |     |     |     |     |            |                                                |                 |                                                                                                         |
|--------|-----|-----|-----|-----|------------|------------------------------------------------|-----------------|---------------------------------------------------------------------------------------------------------|
| CA6119 | 1.4 | 1.0 | 1.0 | 0.8 | ARV1       | complemer involved in sterol uptak orf19.5931  | 128 CaARV1      | SUBCELLL molecular_function unknown                                                                     |
| CA6120 | 1.2 | 1.0 | 1.1 | 0.9 | IPF132     | complemer unknown function orf19.5930          | 132 IPF132      | TRANSCRIPTION CELLULAR TRANSPORT AND TRANSPORT MECHANISMS SUBCELLULAR LOCALISATION                      |
| CA6121 | 0.5 | 1.1 | 0.9 | 1.0 | IPF33      | 17900332..unknown function orf19.5929          | 133 IPF33       | No significant S.c. match                                                                               |
| CA6122 | 0.6 | 0.4 | 0.8 | 0.9 | RPP2B      | complemer acidic ribosomal protei orf19.5928   | 134 CaRPP2B     | PROTEIN tstructural molecule activity                                                                   |
| CA6123 | 0.3 | 1.1 | 0.6 | 1.1 | RPS15.3    | 17902660..40S ribosomal protein orf19.5927     | 135 CaRPS15.3   | PROTEIN tstructural molecule activity                                                                   |
| CA6124 | 0.5 | 0.9 | 1.0 | 1.1 | ARG11      | 17903567..mitochondrial amino acorf19.5926     | 137 CaARG11     | Amino acid transporter activity                                                                         |
| CA6125 | 0.9 | 1.1 | 1.2 | 1.1 | IPF138     | complemer unknown function orf19.5925          | 138 IPF138      | UNCLASSI molecular_function unknown                                                                     |
| CA6126 | 0.7 | 1.0 | 1.1 | 0.9 | IPF143     | complemer unknown function orf19.5924          | 143 IPF143      | TRANSCRIPTION ""CELL RESCUE DEFENSE AND VIRULENCE ""SUBCELLULAR LOCALISATION                            |
| CA6127 | 1.2 | 1.0 | 1.2 | 1.1 | IPF149     | complemer peroxisomal membrani orf19.5921      | 149 IPF149      | CELLULAR TRANSPORT AND TRANSPORT MECHANISMS TRANSPORT FACILITATION                                      |
| CA6128 | 1.1 | 1.0 | 1.0 | 1.1 | IPF152     | complemer unknown function orf19.5919          | 152 IPF152      | UNCLASSI molecular_function unknown                                                                     |
| CA6129 | 1.2 | 0.9 | 1.3 | 1.1 | YRA1.EXO   | complemer RNA annealing protein, exon 2 (by h  | 155 CaYRA1.e)   | TRANSCR molecular_function unknown                                                                      |
| CA6131 | 1.0 | 1.2 | 0.9 | 1.2 | IPF4369    | complemer similar to Saccharomy orf19.5917     | 4369 IPF4369    | TRANSCRIPTION                                                                                           |
| CA6132 | 0.8 | 1.0 | 1.0 | 1.0 | DUR35.5F   | 17927011..Urea transport protein, orf19.5916   | 4365 CaDUR35.   | REGULATION OF/INTERACTION WITH CELLULAR ENVIRONMENT SUBCELLULAR LOCALISATION TRANSPORT FACILITATION     |
| CA6133 | 1.4 | 0.9 |     | 1.1 | DUR35.3F   | 17927715..Urea transport protein, orf19.5915   | 4364 CaDUR35.   | REGULATION OF/INTERACTION WITH CELLULAR ENVIRONMENT SUBCELLULAR LOCALISATION TRANSPORT FACILITATION     |
| CA6134 | 1.4 | 1.2 | 0.8 | 0.8 | MAK21      | complemer Ribosome biogenesis p orf19.5912     | 4362 CaMAK21    | PROTEIN t molecular_function unknown                                                                    |
| CA6135 | 1.1 | 0.8 | 1.1 | 1.2 | CMK1       | 17933003..Ca2+/calmodulin-depe orf19.5911      | 4358 CaCMK1     | CELLULAR COMMUNICATION/SIGNAL TRANSDUCTION MECHANISM CELL FATE SUBCELLULAR LOCALISATION                 |
| CA6137 | 1.2 | 1.2 | 0.9 | 0.9 | IPF4356    | complemer unknown function orf19.5910          | 4356 IPF4356    | TRANSCR molecular_function unknown                                                                      |
| CA6138 | 0.9 | 1.4 | 1.0 | 1.4 | IPF4351    | 17942827..unknown function orf19.5908          | 4351 IPF4351    | TRANSCR transcription regulator activity                                                                |
| CA6139 | 1.0 | 1.1 | 0.7 | 1.2 | ADE2       | 17949698..phosphoribosylaminoir orf19.5906     | 1883 CaADE2     | Nucleotide lyase activity                                                                               |
| CA6140 | 1.0 | 0.8 |     | 1.0 | IPF1882    | complemer unknown function orf19.5905          | 1882 IPF1882    | CELL FATt molecular_function unknown                                                                    |
| CA6141 | 0.4 | 1.0 | 0.7 | 0.9 | RPL19A.3   | 17952958..Ribosomal protein L19 orf19.5904     | 1881 CaRPL19A   | PROTEIN t structural molecule activity                                                                  |
| CA6142 | 0.7 | 0.8 | 0.8 | 1.2 | IPF1879    | complemer unknown function orf19.5903          | 1879 IPF1879    | SUBCELLL molecular_function unknown                                                                     |
| CA6143 | 1.1 | 1.0 |     | 1.1 | IPF1873    | 17959419..putative GTP-binding p orf19.5902    | 1873 IPF1873    | Nucleotide metabolism C-compound and carbohydrate metabolism CELL CYCLE AND DNA PROCESSING CELLULAR COM |
| CA6144 | 0.8 | 1.2 | 1.1 | 1.1 | PKC1       | complemer Ser/thr protein kinase (orf19.5901   | 1872 CaPKC1     | CELL CYC protein kinase activity                                                                        |
| CA6145 | 1.0 | 1.1 | 1.0 | 1.1 | IPF1869    | complemer unknown function orf19.5897          | 1869 IPF1869    | UNCLASSI molecular_function unknown                                                                     |
| CA6146 | 1.1 | 1.1 | 1.2 | 1.1 | IPF1863    | 17968356..unknown function orf19.5896          | 1863 IPF1863    | ENERGY molecular_function unknown                                                                       |
| CA6147 | 1.1 | 1.0 | 1.2 | 1.0 | IPF1862.5f | 17969397..unknown function, 5-pr orf19.5895    | 1862 IPF1862.5f | UNCLASSIFIED PROTEINS                                                                                   |
| CA6148 | 0.6 | 0.9 | 0.8 | 0.8 | IPF1862.3f | 17969860..unknown function, 3-pr orf19.5894    | 1861 IPF1862.3f | UNCLASSI molecular_function unknown                                                                     |
| CA6149 | 1.3 | 2.6 |     | 1.4 | RIP1       | complemer Ubiquinol cytochrome- orf19.5893     | 1859 CARIP1     | ENERGY t transporter activity, oxidoreductase activity                                                  |
| CA6150 | 0.7 | 0.7 | 0.9 | 1.0 | IPF1857    | complemer similar to Saccharomy orf19.5892     | 1857 IPF1857    | TRANSCR ligase activity                                                                                 |
| CA6151 | 1.3 | 1.0 | 0.8 | 1.0 | IPF1853    | 17975894..unknown function orf19.5890          | 1853 IPF1853    | No significant S.c. match                                                                               |
| CA6152 | 0.7 | 0.9 | 0.9 | 1.0 | NUP85      | 17979392..Nuclear pore protein (t orf19.5887   | 1850 CaNUP85    | TRANSCR structural molecule activity                                                                    |
| CA6153 | 0.2 | 0.4 |     | 1.0 | CUP5       | complemer Vacuolar H+-ATPase ( orf19.5886      | 1849 CaCUP5     | CELLULAR TRANSPORT AND TRANSPORT MECHANISMS ""CELL RESCUE DEFENSE AND VIRULENCE ""REGULATION            |
| CA6154 | 0.9 | 1.2 | 1.0 | 1.0 | IPF1848    | 17983285..similar to Saccharomy orf19.5885     | 1848 IPF1848    | TRANSCR RNA binding                                                                                     |
| CA6155 | 1.3 | 1.1 | 1.1 | 1.0 | IPF1846    | 17983986..unknown function orf19.5884          | 1846 IPF1846    | UNCLASSI molecular_function unknown                                                                     |
| CA6156 | 1.4 | 0.9 | 1.0 | 1.1 | GEF1.3F    | complemer Voltage-gated chloride orf19.5881    | 1844 CaGEF1.3f  | CELLULAR TRANSPORT AND TRANSPORT MECHANISMS REGULATION OF/INTERACTION WITH CELLULAR ENVIRON             |
| CA6157 | 1.4 | 1.1 | 1.1 | 1.1 | GEF1.5F    | complemer Voltage-gated chloride orf19.5880    | 1841 CaGEF1.5f  | CELLULAF transporter activity                                                                           |
| CA6158 | 0.7 | 1.0 | 1.3 | 1.0 | IPF1839    | 17990466..putative 1-Acyl dihydro orf19.5879   | 1839 IPF1839    | C-compound and carbohydrate metabolism CELL FATE                                                        |
| CA6159 | 0.8 | 1.1 | 1.1 | 0.9 | IPF1837    | complemer unknown function orf19.5877          | 1837 IPF1837    | C-compour transferase activity                                                                          |
| CA6160 | 1.3 | 1.3 | 1.1 | 1.0 | IPF1835    | 17993845..unknown function orf19.5876          | 1835 IPF1835    | No significant S.c. match                                                                               |
| CA6161 | 0.8 | 1.3 | 1.1 | 1.1 | IPF1834    | complemer probable syntaxin (by orf19.5875     | 1834 IPF1834    | PROTEIN t transporter activity                                                                          |
| CA6162 | 0.8 | 1.0 | 1.1 | 1.1 | IPF1833    | 17995827..similar to opaque phas orf19.5874    | 1833 IPF1833    | No significant S.c. match                                                                               |
| CA6163 | 0.9 | 0.9 | 0.9 | 1.1 | POL1       | 17997165..DNA-directed DNA pol orf19.5873      | 1832 CaPOL1     | CELL CYC nucleotidyltransferase activity                                                                |
| CA6164 | 1.0 | 1.0 | 0.9 | 0.9 | SNF5.5F    | 18001869..Component of SWI/SN orf19.5872       | 14342 CaSNF5.5f | No significant S.c. match                                                                               |
| CA6165 | 0.9 | 1.0 | 1.0 | 1.1 | SNF5.3F    | 18002327..Component of SWI/SN orf19.5871       | 14343 CaSNF5.3f | C-compour transcription regulator activity                                                              |
| CA6166 | 0.6 | 0.9 | 1.0 | 1.2 | CTP1       | 18007015..Citrate transport protei orf19.13291 | 18048 CaCTP1    | C-compour transporter activity                                                                          |

empty:30.11.20

empty:21.15.20

YDR381ca-S. cerevisiae gene

empty:7.19.20

empty:9.1.20

empty:1.19.20

empty:20.5.20

YDR320ca-S. cerevisiae gene

LexA\_BDmarker

empty:13.5.20

empty:32.9.20

empty:25.9.20

empty:17.7.20

empty:25.11.20

empty:10.15.20

empty:5.15.20

empty:8.1.20

empty:8.1.19

empty:12.5.20

empty:31.9.20

empty:24.9.20

empty:16.7.20

empty:16.7.19

empty:14.11.20

empty:26.13.20
