# Supplementary material for: Genome-wide analysis of Candida albicans gene expression patterns during infection of the mammalian kidney
Source: PubMed Central journal article supplement (PMC2698078; doi:10.1016/j.fgb.2008.10.012), 2009-02
Supplement: mmc5.pdf [file mmc5.pdf]

**UP - SC5314 in vivo (58 genes)**

|          |             | RK1  | RK2 | RK3  | RK4 |                                                                        |
|----------|-------------|------|-----|------|-----|------------------------------------------------------------------------|
| DIP51    | CA2204      | 24.4 | 3.9 | 11.6 | 1.5 | dicarboxylic amino acid permease, 5-prime end (by homology)            |
| GAP2     | CA5039      | 20.9 | 7.0 | 47.6 | 3.3 | transporter activity                                                   |
| FRP2     | CA3153      | 16.5 | 5.6 | 34.1 | 4.5 | Related to <i>S. cerevisiae</i> Fun34p                                 |
| IPF14618 | orf19.6079  | 16.1 | 3.0 | 7.5  | 1.6 | unknown function                                                       |
| FRP3     | CA0415      | 14.6 | 7.9 | 26.4 | 4.5 | Related to <i>S. cerevisiae</i> Fun34p                                 |
| PHO89    | CA5160      | 10.4 | 6.9 | 19.5 | 1.8 | Na <sup>+</sup> -coupled phosphate transport (by homology)             |
| ACS1     | CA0848      | 10.1 | 5.1 | 47.9 | 4.0 | acetyl-coenzyme-A synthetase (by homology)                             |
| CTA1     | CA3011      | 9.6  | 3.9 | 5.3  | 1.2 | catalase A, peroxisomal(by homology)                                   |
| CAN2     | CA1191      | 8.9  | 7.2 | 6.1  | 2.5 | amino acid permease (by homology)                                      |
| FAA4     | CA5992      | 8.8  | 5.9 | 5.2  | 1.4 | long-chain fatty acid--CoA ligase and synthetase 4 (by homology)       |
| ACO1     | CA3546      | 8.7  | 5.5 | 4.9  | 1.9 | aconitate hydratase (by homology)                                      |
| IPF17652 | orf19.6078  | 7.6  | 4.8 | 9.6  | 1.5 | reverse transcriptase, 3-prime end (by homology)                       |
| IPF10196 | orf19.2752  | 7.5  | 3.0 | 3.6  | 1.3 | unknown function                                                       |
| IPF19142 | orf19.11467 | 7.0  | 2.7 | 3.1  | 1.0 | unknown function                                                       |
| MLS1     | CA4748      | 6.2  | 4.5 | 3.7  | 1.6 | malate synthase                                                        |
| PHO84    | CA0083      | 6.0  | 5.3 | 6.8  | 2.5 | high-affinity inorganic phosphate/H <sup>+</sup> symporter by homology |
| ALS2     | CA0413      | 5.8  | 3.2 | 3.2  | 1.5 | agglutinin-like protein, 3-prime end                                   |
| IPF15781 | orf19.8335  | 5.5  | 5.7 | 3.3  | 1.8 | unknown function                                                       |
| POX4     | CA1572      | 5.3  | 4.0 | 3.1  | 1.6 | peroxisomal fatty acyl-CoA oxidase (by homology)                       |
| IPF3912  | orf19.6514  | 5.2  | 4.6 | 4.7  | 1.3 | unknown function                                                       |
| IPF14282 | orf19.2296  | 5.1  | 3.5 | 2.6  | 1.1 | Similar to mucin proteins (by homology)                                |
| ALS4     | CA1528      | 5.1  | 3.3 | 3.2  | 1.6 | agglutinin-like protein, 3-prime end                                   |
| CIT1     | CA3909      | 4.9  | 2.6 | 7.1  | 3.5 | Citrate synthase, exon 2                                               |
| DIP51    | CA2203      | 4.7  | 4.9 | 7.5  | 1.6 | dicarboxylic amino acid permease, 3-prime end (by homology)            |
| FRE30    | CA3416      | 4.6  | 2.0 | 2.7  | 1.3 | Strong similarity to ferric reductase Fre2p, 3-prime end (by homology) |
| IPF5625  | orf19.7112  | 4.6  | 3.4 | 2.9  | 1.9 | unknown function                                                       |
| IPF12540 | orf19.8824  | 4.5  | 2.4 | 3.2  | 2.3 | unknown function                                                       |
| ALS1     | CA0316      | 4.4  | 4.7 | 3.1  | 1.3 | agglutinin-like protein, 3-prime end                                   |
| IPF9211  | orf19.3713  | 4.4  | 2.0 | 2.2  | 1.5 | unknown function, 3-prime end                                          |
| PRB1     | CA5322      | 4.4  | 3.6 | 2.8  | 2.2 | Protease B, vacuolar (by homology)                                     |
| ENA22    | CA4929      | 4.2  | 4.4 | 2.0  | 1.8 | P-type ATPase involved in Na <sup>+</sup> efflux (by homology)         |
| RIM11    | CA1465      | 4.1  | 2.6 | 2.3  | 1.2 | Ser/thr protein kinase (by homology)                                   |
| IPF2615  | orf19.6688  | 4.0  | 4.8 | 2.0  | 1.4 | unknown function                                                       |
| IFC4     | CA0442      | 4.0  | 3.9 | 2.4  | 1.8 | unknown function                                                       |
| IPF7715  | orf19.8300  | 3.9  | 2.8 | 2.9  | 1.2 | unknown function                                                       |
| IPF4820  | orf19.10861 | 3.9  | 6.6 | 3.3  | 1.2 | putativecomplex I intermediate associated protein CIA30 (by homology)  |

|          |             |     |     |     |     |                                                                              |
|----------|-------------|-----|-----|-----|-----|------------------------------------------------------------------------------|
| CDR11    | CA0610      | 3.4 | 2.4 | 2.6 | 1.1 | multidrug resistance protein, 5-prime end (by homology)                      |
| AMS1     | CA4123      | 3.3 | 2.4 | 2.0 | 1.6 | alpha-mannosidase (by homology)                                              |
| IPF9496  | orf19.2809  | 3.3 | 4.1 | 2.4 | 1.3 | carnitine O-acetyltransferase (by homology)                                  |
| GDH2     | CA1775      | 3.2 | 2.2 | 2.1 | 1.1 | NAD-specific glutamate dehydrogenase (NAD) (by homology)                     |
| CDR11    | CA0609      | 3.0 | 3.9 | 2.0 | 1.8 | multidrug resistance protein, 3-prime end (by homology)                      |
| SDH12    | CA2470      | 2.8 | 2.1 | 2.2 | 1.1 | Succinate dehydrogenase (by homology)                                        |
| IPF15119 | orf19.9109  | 2.8 | 2.5 | 1.6 | 1.3 | unknown function                                                             |
| PHO84    | CA1782      | 2.8 | 3.4 | 2.6 | 2.0 | Inorganic phosphate transport protein, 3-prime end (by homology)             |
| IPF3937  | orf19.8487  | 2.6 | 2.4 | 2.0 | 0.9 | Unknown function                                                             |
| IPF17190 | orf19.11350 | 2.5 | 2.1 | 2.6 | 1.3 | unknown function                                                             |
| IPF9167  | orf19.2737  | 2.5 | 2.7 | 2.0 | 1.2 | unknown function                                                             |
| IPF11503 | orf19.3902  | 2.4 | 3.2 | 3.5 | 1.3 | unknown function                                                             |
| CDR1     | CA6066      | 2.4 | 3.8 | 2.7 | 1.8 | multidrug resistance protein (by homology)                                   |
| IPF20056 | orf19.2659  | 2.4 | 1.3 | 6.6 | 3.1 | unknown function                                                             |
| IPF13398 | orf19.7708  | 2.3 | 2.1 | 2.8 | 0.8 | protein kinase (by homology)                                                 |
| IPF5681  | orf19.12417 | 2.3 | 2.3 | 2.3 | 1.0 | unknown function                                                             |
| IPF10153 | orf19.2170  | 2.2 | 2.5 | 3.6 | 1.1 | membrane transporter by homology                                             |
| IPF15013 | orf19.13071 | 2.2 | 3.4 | 2.3 | 1.1 | pyruvate decarboxylase regulatory protein (by homology)                      |
| IPF12799 | orf19.2515  | 2.1 | 4.1 | 3.7 | 1.8 | unknown function                                                             |
| AUT7     | CA3802      | 2.1 | 3.0 | 2.6 | 1.3 | microtubule-associated protein essential for autophagy, exon 2 (by homology) |
| KSP1     | CA1288      | 2.0 | 2.1 | 2.2 | 0.9 | SERINE/THREONINE-PROTEIN KINASE by homology                                  |
| ZRT2     | CA3160      | 1.4 | 3.7 | 2.2 | 3.2 | zinc transport protein (by homology)                                         |
