# Supplementary material for: Genome-wide analysis of Candida albicans gene expression patterns during infection of the mammalian kidney
Source: PubMed Central journal article supplement (PMC2698078; doi:10.1016/j.fgb.2008.10.012), 2009-02
Supplement: mmc6.pdf [file mmc6.pdf]

**DOWN - SC5314 in vivo (49 genes)**

|          |            | RK1  | RK2  | RK3  | RK4  |                                                                |
|----------|------------|------|------|------|------|----------------------------------------------------------------|
| HXT62    | CA1067     | 0.07 | 0.14 | 0.12 | 0.19 | sugar transporter                                              |
| HYR1     | CA1576     | 0.10 | 0.01 | 0.26 | 0.13 | hyphally regulated protein                                     |
| SOD5     | CA4836     | 0.11 | 0.12 | 0.10 | 0.68 | Similar to superoxide dismutase (by homology)                  |
| IPF1222  | orf19.2060 | 0.11 | 0.12 | 0.10 | 0.68 | Similar to superoxide dismutase (by homology)                  |
| IPF2431  | orf19.7417 | 0.11 | 0.27 | 0.20 | 1.02 | similar to <i>S. cerevisiae</i> Tsa1p (by homology)            |
| ECE1     | CA1402     | 0.11 | 0.07 | 0.02 | 0.07 | Cell Elongation Protein                                        |
| RNR21    | CA4155     | 0.12 | 0.11 | 0.16 | 0.55 | ribonucleoside-diphosphate reductase (by homology)             |
| HHF22    | CA3372     | 0.13 | 0.18 | 0.35 | 0.92 | histone H4 (by homology)                                       |
| HTA1     | CA4696     | 0.14 | 0.25 | 0.36 | 0.92 | Histone H2A (by homology)                                      |
| PDA1     | CA4412     | 0.15 | 0.29 | 0.24 | 0.72 | Pyruvate dehydrogenase alpha chain (by homology)               |
| CDC19    | CA3483     | 0.16 | 0.36 | 0.28 | 0.84 | pyruvate kinase (by homology)                                  |
| RPL18    | CA6079     | 0.16 | 0.29 | 0.34 | 0.72 | Ribosomal Protein RPL18B (large subunit), exon 2 (by homology) |
| ALS10    | CA0448     | 0.16 | 0.06 | 0.07 | 0.10 | agglutinin like protein                                        |
| RPS13    | CA1304     | 0.16 | 0.41 | 0.49 | 0.90 | ribosomal protein, 3-prime end (by homology)                   |
| IPF12297 | orf19.3117 | 0.16 | 0.06 | 0.11 | 0.39 | mycelial surface antigen (by homology)                         |
| SEC61    | CA3197     | 0.17 | 0.45 | 0.59 | 1.06 | ER protein-translocation complex subunit                       |
| ERG251   | CA0875     | 0.17 | 0.18 | 0.26 | 0.82 | C-4 sterol methyl oxidase (by homology)                        |
| IPF16646 | orf19.1782 | 0.17 | 0.60 | 0.26 | 0.95 | unknown function                                               |
| IPF3634  | orf19.6720 | 0.17 | 0.50 | 0.37 | 0.88 | unknown function                                               |
| ADH1     | CA4765     | 0.19 | 0.56 | 0.32 | 0.21 | alcohol dehydrogenase (by homology)                            |
| IPF10662 | orf19.5760 | 0.20 | 0.25 | 0.32 | 0.39 | unknown function                                               |
| CFL2     | CA3461     | 0.21 | 0.46 | 0.33 | 1.22 | ferric reductase (by homology)                                 |
| TUB2.3   | CA4897     | 0.21 | 0.09 | 0.27 | 0.39 | Beta-tubulin, 3-prime end                                      |
| IPF7940  | orf19.6608 | 0.23 | 0.52 | 0.43 | 1.16 | unknown function                                               |
| IPF15870 | orf19.2685 | 0.23 | 0.06 | 0.06 | 0.40 | unknown function                                               |
| IPF20008 | orf19.2767 | 0.23 | 0.50 | 0.14 | 0.17 | unknown function                                               |
| BEL1     | CA4589     | 0.24 | 0.28 | 0.59 | 0.48 | protein of the 40S ribosomal subunit (by homology)             |
| SUN41    | CA0883     | 0.25 | 0.11 | 0.11 | 0.14 | Putative cell wall beta-glucosidase (by homology)              |
| RPS21    | CA1715     | 0.26 | 0.34 | 0.43 | 0.79 | ribosomal protein (by homology)                                |
| GAP5     | CA4667     | 0.26 | 0.31 | 0.33 | 0.81 | General amino acid permease (by homology)                      |
| HXX2     | CA0127     | 0.27 | 0.28 | 0.36 | 0.54 | hexokinase II, 3-prime end (by homology)                       |
| IPF277   | orf19.3268 | 0.27 | 0.40 | 0.43 | 0.94 | human histamine-releasing factor homolog (by homology)         |
| IPF14171 | orf19.3149 | 0.28 | 0.75 | 0.46 | 0.37 | unknown function                                               |
| TUB1     | CA5546     | 0.29 | 0.08 | 0.36 | 0.77 | Alpha-1 tubulin, 3-prime end                                   |
| CLN21    | CA1582     | 0.30 | 0.27 | 0.39 | 0.99 | G1 cyclin (by homology)                                        |
| HXT5     | CA1069     | 0.30 | 0.45 | 0.58 | 0.29 | sugar transporter, 3-prime end                                 |

|          |            |      |      |      |      |                                                               |
|----------|------------|------|------|------|------|---------------------------------------------------------------|
| IPF1009  | orf19.4590 | 0.31 | 0.26 | 0.43 | 0.91 | Weak similarity to <i>S. cerevisiae</i> RFX1                  |
| PHR1     | CA4857     | 0.36 | 0.26 | 0.23 | 0.42 | GPI-anchored pH responsive glycosyl transferase               |
| GND1     | CA5239     | 0.36 | 0.24 | 0.44 | 0.65 | 6-phosphogluconate dehydrogenase                              |
| IPF2050  | orf19.5265 | 0.37 | 0.47 | 0.42 | 0.71 | similar to <i>S.s cerevisiae</i> Kip1p (by homology)          |
| FET34    | CA1431     | 0.37 | 0.20 | 0.25 | 0.79 | iron transport multicopper oxidase, 3-prime end (by homology) |
| ACH1     | CA0345     | 0.38 | 0.32 | 0.38 | 0.99 | acetyl-coenzyme-A hydrolase (by homology)                     |
| IPF20169 | orf19.5674 | 0.39 | 0.28 | 0.28 | 0.89 | unknown function                                              |
| LSC1     | CA0791     | 0.43 | 0.19 | 0.32 | 0.71 | succinate-CoA ligase / synthetase (by homology)               |
| RBT5     | CA2558     | 0.43 | 0.56 | 0.32 | 0.30 | repressed by TUP1 protein 5                                   |
| ERG3     | CA1956     | 0.43 | 0.20 | 0.46 | 0.85 | C5,6 desaturase                                               |
| HXT61    | CA1070     | 0.43 | 0.38 | 0.78 | 0.46 | sugar transporter                                             |
| RPL2     | CA3307     | 0.44 | 0.37 | 0.44 | 0.64 | ribosomal protein L8, 3-prime end (by homology)               |
| HGT11    | CA1506     | 1.37 | 0.28 | 0.46 | 0.44 | hexose transporter                                            |
