# Supplementary material for: Genome-wide analysis of Candida albicans gene expression patterns during infection of the mammalian kidney
Source: PubMed Central journal article supplement (PMC2698078; doi:10.1016/j.fgb.2008.10.012), 2009-02
Supplement: mmc8.pdf [file mmc8.pdf]

**UP - CAI4 in vivo (4 genes)**

|       |        | Rabbit 1 |      | Rabbit 2 |      | Rabbit 3 |      |                                       |
|-------|--------|----------|------|----------|------|----------|------|---------------------------------------|
|       |        | RK1A     | RK1B | RK2A     | RK2B | RK3A     | RK3B |                                       |
| HSP12 | CA0627 | 2.29     | 4.56 | 2.68     | 2.75 | 1.48     | 1.82 | Heat shock protein (by homology)      |
| DDR48 | CA4336 | 1.20     | 1.20 | 4.44     | 5.43 | 2.21     | 3.22 | stress protein (by homology)          |
| PDC11 | CA2474 | 1.13     | 0.60 | 2.86     | 4.01 | 2.34     | 3.53 | Pyruvate decarboxylase (by homology)  |
| GPM1  | CA4671 | 0.98     | 0.65 | 2.71     | 3.50 | 2.38     | 2.20 | phosphoglycerate mutase (by homology) |
