# Supplementary material for: Genome-wide analysis of Candida albicans gene expression patterns during infection of the mammalian kidney
Source: PubMed Central journal article supplement (PMC2698078; doi:10.1016/j.fgb.2008.10.012), 2009-02
Supplement: mmc9.pdf [file mmc9.pdf]

**DOWN - CAI4 in vivo (5 genes)**

|         |           | Rabbit 1 |      | Rabbit 2 |      | Rabbit 3 |      |                                               |
|---------|-----------|----------|------|----------|------|----------|------|-----------------------------------------------|
|         |           | RK1A     | RK1B | RK2A     | RK2B | RK3A     | RK3B |                                               |
| PCK1    | CA5857    | 1.08     | 0.48 | 0.38     | 0.18 | 0.55     | 0.49 | phosphoenolpyruvate carboxykinase             |
| IPF8762 | orf19.822 | 1.05     | 0.59 | 0.25     | 0.33 | 0.39     | 0.11 | unknown function                              |
| SOD5    | CA4836    | 0.77     | 0.15 | 0.10     | 0.06 | 0.16     | 0.06 | Similar to superoxide dismutase (by homology) |
| ADH1    | CA4765    | 0.12     | 0.33 | 0.56     | 0.39 | 0.22     | 0.20 | alcohol dehydrogenase (by homology)           |
| ECE1    | CA1402    | 0.10     | 0.22 | 0.48     | 0.27 | 0.29     | 0.19 | Cell Elongation Protein                       |
