# Supplementary material for: Genome-wide analysis of Candida albicans gene expression patterns during infection of the mammalian kidney
Source: PubMed Central journal article supplement (PMC2698078; doi:10.1016/j.fgb.2008.10.012), 2009-02
Supplement: mmc10.pdf [file mmc10.pdf]

## Comparison of NGY152 expression profiles in different kidneys

### Same Animals

| Kidneys     | Correlation Coefficient |
|-------------|-------------------------|
| 1A X 1B     | 0.51                    |
| 2A X 2B     | 0.67                    |
| 3A X 3B     | 0.55                    |
| <b>Mean</b> | <b>0.58</b>             |
| <b>SD</b>   | <b>0.08</b>             |

### Different Animals

| Kidneys     | Correlation Coefficient |
|-------------|-------------------------|
| 1B X 2A     | 0.04                    |
| 1A X 2A     | 0.05                    |
| 1A X 2B     | 0.06                    |
| 1A X 3A     | 0.08                    |
| 1A X 3B     | 0.11                    |
| 1B X 2A     | 0.62                    |
| 1B X 2B     | 0.07                    |
| 1B X 3A     | 0.04                    |
| 1B X 3B     | 0.11                    |
| 2A X 3A     | 0.48                    |
| 2A X 3B     | 0.52                    |
| 2B X 3A     | 0.10                    |
| 2B X 3B     | 0.64                    |
| <b>Mean</b> | <b>0.23</b>             |
| <b>SD</b>   | <b>0.24</b>             |
