# Supplementary material for: Genome-wide analysis of Candida albicans gene expression patterns during infection of the mammalian kidney
Source: PubMed Central journal article supplement (PMC2698078; doi:10.1016/j.fgb.2008.10.012), 2009-02
Supplement: mmc11.pdf [file mmc11.pdf]

## Gene expression versus virulence phenotype

\*\* Virulence phenotype as annotated in CGD (August 2007)

| Gene          | Gene product                       | Fold expression <i>in vivo</i> |      |      |      | Virulence **                         | First author    | Journal                               | Volume page no.   | Date |
|---------------|------------------------------------|--------------------------------|------|------|------|--------------------------------------|-----------------|---------------------------------------|-------------------|------|
| AAF1          | unknown function                   | 0.85                           | 0.88 | 1.10 | 1.10 | attenuated                           | Rieg            | Infection and Immunity                | 67(7), 3193       | 1999 |
| ACE2          | cell separation factor             | 1.14                           | 1.09 | 1.03 | 1.06 | attenuated                           | Kelly           | Molecular Microbiology                | 53(3), 969        | 2004 |
| ADE2          | phosphoribosylamino-               | 1.03                           | 1.12 | 0.70 | 1.19 | attenuated                           | Kirsch          | Infection and Immunity                | 59(9), 3297       | 1991 |
| ALO1          | D-arabinono-1,4-lactone            | 1.06                           | 0.53 | 1.01 | 0.93 | attenuated                           | Huh             | Infection and Immunity                | 69(6), 3939       | 2001 |
| ALS1          | surface adhesin                    | 4.41                           | 4.65 | 3.13 | 1.28 | attenuated                           | Fu              | Molecular Microbiology                | 44(1), 61         | 2002 |
| AQY1          | aquaporin                          | 1.06                           | 1.63 | 1.21 | 1.08 | normal                               | Carbrey         | Yeast                                 | 18(15), 1391      | 2001 |
| ARN1 / SIT1   | Iron transporter                   | 2.34                           | 0.75 | 1.27 | 1.26 | normal                               | Chuan-Jiong Hu  |                                       |                   | 2002 |
| ASH1          | transcription factor               | 1.35                           | 0.91 | 0.99 | 1.20 | attenuated                           | Inglis          | Molecular and Celular Biology         | 22(24), 8669      | 2002 |
| BGL2          | 1-3 b-glucosyltransferase          | 0.95                           | 1.08 | 0.82 | 1.15 | attenuated                           | Sarthy          | Microbiology                          | 143(Pt 2), 367    | 1997 |
| BIG1          | b-1,6-glucan biosynthesis          | 0.99                           | 0.90 | 1.22 |      | attenuated                           | Umeyama         | Infection and Immunity                | 74(4), 2373       | 2006 |
| BNI1          | formin                             | 0.62                           | 1.25 | 0.94 | 1.23 | attenuated                           | Li              | Eukaryotic Cell                       | 118(Pt. 12), 2637 | 2005 |
| CAP1          | adenyl cyclase regulator           | 1.47                           | 1.72 | 1.51 | 1.32 | attenuated                           | Bahn            | Journal of Bacteriology               | 183(10), 3211     | 2001 |
| CDC10         | septin                             | 0.50                           | 0.59 | 0.91 | 0.91 | attenuated                           | Warenda         | Infection and Immunity                | 71(7), 4045       | 2003 |
| CDC11         | septin                             | 0.90                           | 0.81 | 0.78 | 0.83 | attenuated                           | Warenda         | Infection and Immunity                | 71(7), 4045       | 2003 |
| CDC24         | GDP:GTP exchange factor            | 1.68                           | 1.31 | 1.25 | 0.88 | attenuated                           | Bassilana       | Eukaryotic Cell                       | 2(1), 9           | 2003 |
| CDC35 / CYR1  | adenyl cyclase regulator           | 2.02                           | 0.93 | 0.97 | 1.09 | attenuated                           | Rocha           | Molecular Biology of the Cell         | 12(11), 3631      | 2001 |
| CDC42         | G-protein (GTPase)                 | 0.70                           | 0.72 | 0.91 | 1.18 | attenuated                           | Bassilana       | Eukaryotic Cell                       | 2(1), 9           | 2003 |
| CEK1 / ERK1   | MAP kinase                         | 1.01                           | 0.94 | 0.94 | 0.92 | attenuated                           | Csank           | Infection and Immunity                | 66(6), 2713       | 1998 |
| CHS1          | chitin synthase                    | 0.81                           | 0.88 | 1.06 | 0.80 | attenuated                           | Munro           | Molecular Microbiology                | 39(5), 1414       | 2001 |
| CHS2          | chitin synthase                    | 1.30                           | 0.89 | 0.90 | 1.25 | normal                               | Gow             | PNAS                                  | 91(13), 6216      | 1994 |
| CHS3          | chitin synthase                    | 1.28                           | 1.05 | 1.03 | 1.02 | attenuated                           | Bulawa          | PNAS                                  | 92(23), 10570     | 1995 |
|               |                                    |                                |      |      |      | attenuated in model of oropharyngeal |                 |                                       |                   |      |
| CKA2          | protein kinase                     | 0.84                           | 0.86 | 1.04 | 1.00 | candidiasis                          | Chiang          | Cellular Microbiology                 |                   | 2006 |
| CLA4          | ser/thr protein kinase             | 1.20                           | 0.93 | 0.91 | 1.16 | attenuated                           | Leberer         | Current Biology                       | 7(8), 539         | 1997 |
| CNA1 / CMP1   | calcineurin A                      | 1.07                           | 1.01 | 1.16 | 1.00 | attenuated                           | Sanglard        | Molecular Microbiology                | 48(4), 959        | 2003 |
| CNB1          | calcineurin B                      | 0.58                           | 0.85 | 0.92 | 1.00 | attenuated                           | Blankenship     | Eukaryotic Cell                       | 2(3), 422         | 2003 |
| COS1 / NIK1   | histidine kinase                   | 1.45                           | 1.61 | 1.12 | 1.26 | attenuated                           | Selitrechnikoff | Medical Mycology                      | 39(1), 69         | 2001 |
| CPH1          | regulatory cascade                 | 1.05                           | 1.04 | 1.02 | 1.22 | normal                               | Csank           | Infection and Immunity                | 66(6), 2713       | 1998 |
| CPP1          | protein phosphatase                | 1.22                           | 0.98 | 1.00 | 0.93 | attenuated                           | Csank           | Molecular Biology of the Cell         | 8(12), 2539       | 1997 |
| CRH11         | cell wall protein                  | 0.22                           | 0.16 | 0.57 | 0.91 | attenuated                           | Pardini         | Journal of Biological Chemistry       |                   | 2006 |
| CRH12         | cell wall protein                  | 0.88                           | 0.87 | 1.03 | 1.19 | attenuated                           | Pardini         | Journal of Biological Chemistry       |                   | 2006 |
| CRK1          | Cdc2 kinase                        | 1.79                           | 1.22 | 1.07 | 0.85 | attenuated                           | Chen            | Molecular and Celular Biology         | 20(23), 8696      | 2000 |
| CRZ1          | calcineurin dependent zinc finger  | 1.05                           | 1.13 | 1.28 | 0.89 | normal                               | Onyewu          | Infection and Immunity                | 72(12), 7330      | 2004 |
| CSF4 / UTR2   | glycosidase                        | 1.01                           | 1.09 | 0.92 | 1.00 | attenuated                           | Alberti-Segui   | Yeast                                 | 21(4), 285        | 2004 |
| CSH1 / IFO4   | cell surface hydrophobicity        | 0.54                           | 0.93 | 0.97 | 0.88 | attenuated                           | Singleton       | FEMS Microbiology Letters             | 244(2), 373       | 2005 |
| CSH3 / SHR3   | ER packaging chaperone             | 1.52                           | 0.94 | 0.90 | 0.85 | attenuated                           | Martínez P      | Molecular Microbiology                | 51(2), 371        | 2004 |
| CSP37         | 37 kDa surface protein             | 1.72                           | 1.91 | 1.10 | 0.94 | attenuated                           | Sentandreu      | Journal of Bacteriology               | 179(15), 4654     | 1997 |
| CST20 / STE20 | MEKK kinase                        | 1.06                           | 1.09 | 1.04 | 1.17 | attenuated                           | Leberer         | PNAS                                  | 93(23), 13217     | 1996 |
| CTA1          | catalase                           | 9.63                           | 3.90 | 5.31 | 1.23 | attenuated                           | Wysong          | Infection and Immunity                | 66(5), 1953       | 1998 |
| DAC1 / NAG2   | N-acetyl GlcNH2 catabm             | 0.80                           | 1.30 | 0.97 | 1.09 | attenuated                           | Singh           | Infection and Immunity                | 69(12), 7898      | 2001 |
| ECM33         | surface protein                    | 0.53                           | 0.43 | 0.24 | 1.05 | attenuated                           | Martinez-Lopez  | Microbiology                          | 150(Pt 10), 3341  | 2004 |
| EFG1          | transcription factor               | 1.90                           | 1.82 | 1.55 | 1.06 | attenuated                           | Lo              | Cell                                  | 90(5), 939        | 1997 |
| ERG3          | ergosterol synthesis               | 0.43                           | 0.20 | 0.46 | 0.85 | attenuated                           | Chau            | Antimicrobial Agents and Chemotherapy | 49(9), 3636       | 2005 |
| ESS1 / PIN1   | peptidyl-prolyl cis/trans isomeras | 0.80                           | 0.86 | 0.79 | 1.03 | attenuated                           | Li              | Biochemistry                          | 44(16), 6180      | 2005 |
| FAD2          | fatty acid synthase                | 1.49                           | 1.03 | 1.17 | 0.88 | normal                               | Murayama        | Microbiology                          | 152(Pt 5), 1551   | 2006 |
| FAD3          | fatty acid synthase                | 1.10                           | 0.99 | 0.90 | 1.01 | normal                               | Murayama        | Microbiology                          | 152(Pt 5), 1551   | 2006 |
| FAS2          | fatty acid synthase                | 0.78                           | 0.53 | 1.08 | 0.83 | attenuated                           | Zhao            | Infection and Immunity                | 65(2), 829        | 1997 |

|                           |                                  |      |      |      |      |                                                                                               |              |                                     |                  |      |
|---------------------------|----------------------------------|------|------|------|------|-----------------------------------------------------------------------------------------------|--------------|-------------------------------------|------------------|------|
| <i>FBA1</i>               | fructose-1,6-biphosphate aldolas | 0.50 | 1.76 | 0.80 | 0.72 | partial attenuation                                                                           | Rodaki       | Eukaryotic Cell                     | 5(8), 1371       | 2006 |
| <i>FET3</i>               | iron transport protein           | 1.11 | 1.04 | 1.02 | 1.01 | normal                                                                                        | Eck          | Microbiology                        | 145(Pt9), 2415   | 1999 |
| <i>FLO8</i>               | transcription factor             | 4.46 | 1.05 | 1.37 | 0.96 | avirulent                                                                                     | Cao          | Molecular Biology of the Cell       | 17(1), 295       | 2006 |
| <i>FOX2</i>               | b-oxidation                      |      |      |      |      | attenuated                                                                                    | Piekarska    | Eukaryotic Cell                     | 5(11), 1847      | 2006 |
| <i>FTR1</i>               | high affinity iron permease      | 0.58 | 0.30 | 0.19 | 0.80 | attenuated                                                                                    | Ramanan      | Science                             | 288(5468), 1062  | 2000 |
| <i>FTR2</i>               | high affinity iron permease      | 1.05 | 0.21 | 0.50 | 1.06 | normal                                                                                        | Ramanan      | Science                             | 288(5468), 1062  | 2000 |
| <i>GAT1</i>               | transcription factor             | 1.12 | 0.86 | 0.99 | 1.02 | attenuated                                                                                    | Limjindaporn | Molecular Microbiology              | 50(3), 993       | 2003 |
| <i>GNA1</i>               | gln-6-P acetyl transferase       | 0.74 | 1.02 | 1.84 | 1.05 | attenuated                                                                                    | Mio          | Microbiology                        | 146(Pt 7), 1753  | 2000 |
| <i>GPI7</i>               | transcription factor             | 1.49 | 1.05 | 1.09 | 0.85 | attenuated                                                                                    | Richard      | Molecular Microbiology              | 44(3), 841       | 2002 |
| <i>HEM3</i>               | uroporphyrin I synthase          | 2.27 | 1.13 | 1.26 | 1.16 | attenuated                                                                                    | Kirsch       | Infection and Immunity              | 59(9), 3297      | 1991 |
| <i>HGT4 / SNF3 / GSP1</i> | glucose sensor                   | 3.26 | 1.71 | 2.30 | 1.12 | slower than normal                                                                            | Brown        | Eukaryotic Cell                     | 5(10), 1726      | 2006 |
| <i>HK1</i>                | histidine kinase                 | 1.44 | 1.08 | 1.09 | 0.94 | attenuated                                                                                    | Calera       | Infection and Immunity              | 68(2), 518       | 1999 |
| <i>HOG1</i>               | MAP kinase                       | 0.73 | 0.92 | 1.05 | 1.03 | attenuated                                                                                    | Alonso-Monge | Journal of Bacteriology             | 181(10), 3058    | 1999 |
| <i>HSL1</i>               | protein kinase                   | 0.65 | 0.91 | 1.00 | 1.07 | attenuated                                                                                    | Umeyama      | Molecular Microbiology              | 55(2), 381       | 2005 |
| <i>HST1</i>               | regulatory cascade               |      |      |      |      | normal                                                                                        | Csank        | Infection and Immunity              | 66(6), 2713      | 1998 |
| <i>HST7 / STE7</i>        | MEK kinase                       | 1.05 | 0.88 | 1.03 | 0.93 | normal                                                                                        | Leberer      | PNAS                                | 93(23), 13217    | 1996 |
| <i>HWP1</i>               | transglutaminase                 | 0.38 | 0.96 | 0.03 | 0.95 | attenuated                                                                                    | Staab        | Science                             | 283(5407), 1535  | 1999 |
| <i>ICL1</i>               | isocitrate lyase                 | 1.96 | 4.54 | 1.42 | 1.26 | attenuated                                                                                    | Lorenz       | Nature                              | 412(6842), 83    | 2001 |
| <i>INT1</i>               | surface protein                  | 0.66 | 0.89 | 0.88 | 1.30 | attenuated                                                                                    | Gale         | Science                             | 279:1355-1358    | 1998 |
| <i>IRO1</i>               | possible transcription factor    | 0.55 | 1.17 | 0.92 | 1.04 | attenuated                                                                                    | Chibana      | Microbiology and Immunology         | 49(10), 937      | 2005 |
| <i>IRS4</i>               | immunogenic protein              | 1.38 | 0.99 | 1.10 | 1.02 | partial attenuation                                                                           | Badrane      | Microbiology                        | 151(pt 9), 2923  | 2005 |
| <i>KEX2</i>               | kexin (subtilase)                | 0.92 | 1.18 | 0.90 | 1.15 | attenuated                                                                                    | Newport      | The Journal of Biological Chemistry | 278(3), 1713     | 2003 |
|                           | UDP-glucose:glycoprotein         |      |      |      |      |                                                                                               |              |                                     |                  |      |
| <i>KRE5</i>               | glucosyltransferase              | 1.27 | 0.97 | 1.12 | 0.93 | attenuated                                                                                    | Herrero      | Eukaryotic Cell                     | 3(6), 1423       | 2004 |
| <i>LIG4 / CDC9</i>        | DNA ligase                       | 0.87 | 1.16 | 0.69 | 1.22 | attenuated                                                                                    | Andaluz      | Infection and Immunity              | 69(1), 137       | 2001 |
| <i>MAD2</i>               | spindle assembly factor          | 0.83 | 1.04 | 1.08 | 0.82 | attenuated                                                                                    | Bai          | Molecular Microbiology              | 45(1), 31        | 2002 |
| <i>MDR1</i>               | membrane efflux pump             | 1.77 | 1.16 | 1.03 | 0.78 | attenuated                                                                                    | Becker       | Infection and Immunity              | 63(11), 4515     | 1995 |
| <i>MIG1</i>               | DNA-binding protein              | 1.01 | 0.86 | 1.05 | 1.12 | normal                                                                                        | Zaragoza     | Journal of Bacteriology             | 182(2), 320      | 2000 |
| <i>MIT1</i>               | inositol P-ceramide/             | 1.20 | 1.31 | 1.24 | 1.10 | attenuated                                                                                    | Mille        | The Journal of Biological Chemistry | 279(46), 47952   | 2004 |
| <i>MKC1</i>               | MAP kinase                       | 0.74 | 1.17 | 0.86 | 0.97 | attenuated                                                                                    | Diez-Orejas  | Infection and Immunity              | 65(2), 833       | 1997 |
|                           | iron regulated a1,2-mannosyl     |      |      |      |      |                                                                                               |              |                                     |                  |      |
| <i>MNN5</i>               | transferase                      | 1.22 | 0.87 |      | 1.24 | attenuated                                                                                    | Bai          | Eukaryotic Cell                     | 5(2), 238        | 2006 |
| <i>MNT1</i>               | a1,2-mannosyl transferase        | 0.97 | 0.69 | 0.76 | 1.15 | attenuated                                                                                    | Buurman      | PNAS                                | 95(13), 7670     | 1998 |
| <i>MNT2</i>               | mannosyl transferases            | 0.78 | 1.11 |      | 0.94 | attenuated                                                                                    | Munro        | The Journal of Biological Chemistry | 280(2), 1051     | 2005 |
| <i>NAG2</i>               | NAGP deacetylase                 | 0.80 | 1.30 | 0.97 | 1.09 | attenuated                                                                                    | Yamada-Okabe | FEMS Microbiology Letters           | 212(1), 15       | 2002 |
| <i>NAG5 / HXK1</i>        | NAG kinase                       | 1.20 | 1.24 | 0.97 | 0.94 | attenuated                                                                                    | Yamada-Okabe | FEMS Microbiology Letters           | 212(1), 15       | 2002 |
| <i>NIK1 / COS1</i>        | histidine kinase                 | 1.45 | 1.61 | 1.12 | 1.26 | attenuated                                                                                    | Yamada-Okabe | Journal of Bacteriology             | 181(23), 7243    | 1999 |
| <i>NMT1</i>               | N-myristoyl transferase          | 1.04 | 1.06 | 1.01 | 1.13 | attenuated                                                                                    | Weinberg     | Molecular Microbiology              | 16(2), 241       | 1995 |
| <i>NOT4 / MOT2 / SIG1</i> | transcription factor             | 1.00 | 1.00 | 1.08 | 0.93 | attenuated                                                                                    | Krueger      | Microbiology                        | 150(Pt 1), 229   | 2004 |
|                           |                                  |      |      |      |      | attenuated only in<br>intravenous infection of<br>neutropenic and<br>immunosuppressed<br>mice |              |                                     |                  |      |
| <i>NOT5</i>               | immunogenic protein              | 0.90 | 1.26 | 1.07 | 0.96 |                                                                                               | Cheng        | Infection and Immunity              | 73(11), 7190     | 2005 |
| <i>NRG1</i>               | transcriptional repressor        | 2.43 | 1.49 |      | 0.92 | attenuated                                                                                    | Murad        | The EMBO Journal                    | 20(17), 4742     | 2001 |
| <i>NTC1 / NTH1</i>        | neutral trehalase                | 1.10 | 1.26 | 1.29 | 1.38 | normal                                                                                        | Eck          | Microbiology                        | 143(Pt 12), 3747 | 1997 |
| <i>PEX5</i>               | b-oxidation                      | 1.43 | 1.92 | 1.10 | 0.93 | normal                                                                                        | Piekarska    | Eukaryotic Cell                     | 5(11), 1847      | 2006 |
| <i>PHR1</i>               | pH-regulated expression          | 0.36 | 0.26 | 0.23 | 0.42 | attenuated                                                                                    | Ghannoum     | Infection and Immunity              | 63(11), 4528     | 1995 |
| <i>PHR2</i>               | pH-regulated expression          | 0.81 | 0.92 | 1.06 | 1.05 | normal                                                                                        | De Bernardis | Infection and Immunity              | 66(7), 3317      | 1998 |
| <i>PLB1</i>               | phospholipase B                  | 0.88 | 1.01 |      | 1.00 | attenuated                                                                                    | Leidich      | The Journal of Biological Chemistry | 273(40), 26078   | 1998 |
| <i>PLC2</i>               | phospholipase C                  |      |      |      |      | normal                                                                                        | Kunze        | Microbiology                        | 151(Pt 10), 3381 | 2005 |
| <i>PLC3</i>               | phospholipase C                  | 1.54 | 0.97 |      | 0.80 | normal                                                                                        | Kunze        | Microbiology                        | 151(Pt 10), 3381 | 2005 |
| <i>PLD1 / SPO14</i>       | phospholipase D                  | 1.49 | 1.56 | 0.85 | 0.95 | attenuated                                                                                    | Hube         | Microbiology                        | 147(Pt 4), 879   | 2001 |
| <i>PMR1</i>               | P-type ATPase                    | 0.80 | 0.95 | 0.93 | 0.91 | attenuated                                                                                    | Bates        | The Journal of Biological Chemistry | 280(24), 23408   | 2005 |

|                                   |                             |      |      |      |      |                       |              |                                     |                    |      |
|-----------------------------------|-----------------------------|------|------|------|------|-----------------------|--------------|-------------------------------------|--------------------|------|
| <i>PMT1</i>                       | protein-O-mannosylation     | 1.08 | 0.63 |      | 0.96 | attenuated            | Timpel       | The Journal of Biological Chemistry | 273(33), 20837     | 1998 |
| <i>PMT2</i>                       | protein-O-mannosylation     | 0.50 | 0.64 | 0.64 | 0.94 | attenuated            | Rouabhia     | Infection and Immunity              | 73(8), 4571        | 2005 |
| <i>PMT4</i>                       | protein-O-mannosylation     | 0.41 | 0.85 | 0.67 | 1.18 | attenuated            | Rouabhia     | Infection and Immunity              | 73(8), 4571        | 2005 |
| <i>PMT5</i>                       | protein-O-mannosylation     | 0.76 | 1.01 | 0.97 | 1.08 | attenuated            | Rouabhia     | Infection and Immunity              | 73(8), 4571        | 2005 |
| <i>PMT6</i>                       | protein-O-mannosylation     | 0.66 | 0.81 | 1.11 | 1.01 | attenuated            | Rouabhia     | Infection and Immunity              | 73(8), 4571        | 2005 |
|                                   |                             |      |      |      |      |                       |              |                                     |                    |      |
|                                   |                             |      |      |      |      | 1x10(6) and 1.5x10(6) |              |                                     |                    |      |
| <i>RAD52</i>                      | homologous recombination    | 0.93 | 0.85 | 0.92 | 0.92 | cells                 | Chauhan      | Infection and Immunity              | 73(12), 8069       | 2005 |
| <i>RAS1</i>                       | regulates gene expression   | 1.16 | 1.50 | 1.23 | 1.09 | attenuated            | Leberer      | Molecular Microbiology              | 42(3), 673         | 2001 |
| <i>RBT1</i>                       | hypha-specific wall protein | 0.31 | 0.56 | 1.02 | 1.31 | attenuated            | Braun        | Genetics                            | 156(1), 31         | 2000 |
| <i>RBT4</i>                       | unknown function            | 0.30 | 0.59 | 0.22 | 0.90 | attenuated            | Braun        | Genetics                            | 156(1), 31         | 2000 |
| <i>RBT5</i>                       | unknown function            | 0.43 | 0.56 | 0.32 | 0.30 | attenuated            | Braun        | Genetics                            | 156(1), 31         | 2000 |
| <i>RFG1 / ROX1</i>                | transcription factor        | 0.89 | 0.83 | 0.99 | 0.83 | attenuated            | Kadosh       | Molecular and Celular Biology       | 21(7), 2496        | 2001 |
| <i>RIM101</i>                     | transcription factor        | 1.51 | 0.94 | 2.86 | 0.83 | attenuated            | Davis        | Infection and Immunity              | 68(10), 5953       | 2000 |
| <i>RIM8</i>                       | transcription factor        | 1.16 | 1.27 | 0.97 | 0.90 | attenuated            | Davis        | Infection and Immunity              | 68(10), 5953       | 2000 |
| <i>RSR1</i>                       | GTPase                      | 0.72 | 0.99 | 1.20 | 1.00 | attenuated            | Yaar         | Microbiology                        | 143(Pt 9), 3033    | 1997 |
| <i>SAP1</i>                       | aspartyl proteinase         | 0.86 | 0.91 | 1.09 | 1.14 | attenuated            | Hube         | Infection and Immunity              | 65(9), 3529        | 1997 |
| <i>SAP2</i>                       | aspartyl proteinase         | 1.07 | 0.78 | 0.62 | 1.11 | attenuated            | Hube         | Infection and Immunity              | 65(9), 3529        | 1997 |
| <i>SAP3</i>                       | aspartyl proteinase         | 0.98 | 0.87 | 0.88 | 0.93 | attenuated            | Hube         | Infection and Immunity              | 65(9), 3529        | 1997 |
| <i>SAP4</i>                       | SAP4-6 KO                   | 0.94 | 0.85 | 1.15 | 1.00 | attenuated            | Sanglard     | Infection and Immunity              | 65(9), 3539        | 1997 |
| <i>SAP5</i>                       | SAP4-6 KO                   | 0.95 | 0.89 | 1.24 | 0.88 | attenuated            | Sanglard     | Infection and Immunity              | 65(9), 3539        | 1997 |
| <i>SAP6</i>                       | SAP4-6 KO                   | 0.96 | 0.92 | 1.06 | 1.01 | attenuated            | Sanglard     | Infection and Immunity              | 65(9), 3539        | 1997 |
| <i>SET1</i>                       | methyltransferase           | 0.92 | 1.14 | 1.22 | 1.09 | partial attenuation   | Raman        | Molecular Microbiology              | 60(3), 697         | 2006 |
| <i>SIT4</i>                       | protein phosphatase         | 1.15 | 1.01 | 1.15 | 1.14 | attenuated            | Lee          | Molecular Microbiology              | 51(3), 691         | 2004 |
| <i>SLN1</i>                       | histidine kinase            | 1.48 | 1.21 | 0.92 | 0.72 | attenuated            | Yamada-Okabe | Journal of Bacteriology             | 181(23), 7243      | 1999 |
| <i>SNF1</i>                       | essential for viability     | 1.12 | 1.04 | 0.99 | 0.87 | normal                | Petter       | Infection and Immunity              | 65(12), 4909       | 1997 |
| <i>SOD1</i>                       | superoxide dismutase        | 0.85 | 0.74 | 0.82 | 0.95 | attenuated            | Hwang        | Microbiology                        | 148(Pt 11), 3705   | 2002 |
| <i>SOD5 / PGA3</i>                | superoxide dismutase        | 0.11 | 0.12 | 0.10 | 0.68 | attenuated            | Martchenko   | Molecular Biology of the Cell       | 15(2), 456         | 2004 |
| <i>SPA2</i>                       | cell polarity regulator     | 1.07 | 1.19 | 1.15 | 1.11 | attenuated            | Zheng        | Molecular Microbiology              | 49(5), 1391        | 2003 |
| <i>SPT3</i>                       | transcriptional activator   | 1.32 | 1.05 | 0.87 | 0.76 | attenuated            | Laprade      | Genetics                            | 161(2), 509        | 2002 |
| <i>SSK1</i>                       | 2-component response reg.   | 1.16 | 1.35 | 1.14 | 1.25 | attenuated            | Calera       | Infection and Immunity              | 67(8), 4280        | 2000 |
| <i>SSN6</i>                       | transcriptional corepressor | 1.22 | 0.85 | 0.97 | 1.41 | attenuated            | Hwang        | Microbiology                        | 47(4), 1029        | 2003 |
| <i>SWI1</i>                       | chromatin remodelling       | 0.89 | 0.92 |      | 1.01 | attenuated            | Mao          | FEBS Letters                        | 580 (11), 2615     | 2006 |
| <i>TEC1</i>                       | hyphal transcription factor | 0.95 | 1.42 | 0.95 | 1.36 | attenuated            | Schweizer    | Molecular Microbiology              | 38 (3), 435        | 2000 |
| <i>TOP1</i>                       | topoisomerase               | 0.75 | 1.04 | 1.07 | 0.92 | attenuated            | Jiang        | Microbiology                        | 143 ( Pt 2), 377   | 1997 |
| <i>TPK1</i>                       | protein kinase A subunit    | 1.14 | 0.96 | 1.00 | 1.07 | normal                | Park         |                                     |                    | 2005 |
| <i>TPK2</i>                       | protein kinase A subunit    | 0.71 | 0.84 | 0.88 | 1.03 | attenuated            | Sonneborn    | Molecular Microbiology              | 35 (2) 386         | 2000 |
| <i>TPS1</i>                       | trehalose phos. synthase    | 0.76 | 0.96 | 0.96 | 1.07 | attenuated            | Zaragoza     | Journal of Bacteriology             | 182(2), 320        | 1998 |
| <i>TPS2</i>                       | trehaloseP phosphatase      | 1.01 | 0.93 | 0.88 | 0.66 | attenuated            | Van Dijk     | Infection and Immunity              | 70 (4) 1772        | 2002 |
| <i>TUP1</i>                       | transcriptional repressor   | 1.68 | 0.68 | 1.11 | 0.95 | attenuated            | Murad        | The EMBO Journal                    | 20(17), 4742       | 2001 |
| <i>URA3</i>                       | nucleotide synthesis        | 1.51 | 0.96 | 0.95 | 0.83 | attenuated            | Kirsch       | Infection and Immunity              | 59(9), 3297        | 1991 |
| <i>UTR2</i>                       | cell wall protein           | 1.02 | 1.11 | 0.93 | 1.01 | attenuated            | Pardini      | Journal of Biological Chemistry     | 281 (52), 40399    | 2006 |
| <i>VAC1 / PEP7</i>                | vesicle transport           | 1.44 | 1.03 | 1.05 | 0.85 | attenuated            | Franke       | Microbiology                        | 152 (Pt 10), 3111  | 2006 |
| <i>VMA7</i>                       | vacuolar ATPase             | 0.81 | 1.21 | 1.05 | 0.94 | attenuated            | Poltermann   | Microbiology                        | 151 (Pt 5) 1645    | 2005 |
| <i>VPS28</i>                      | endocytic coponents         | 0.71 | 1.13 | 1.03 | 0.95 | attenuated            | Cornet       | Infection and Immunity              | 73 (12), 7977      | 2005 |
| <i>VPS32 / SNF7</i>               | endocytic components        | 1.25 | 0.97 |      | 1.17 | attenuated            | Cornet       | Infection and Immunity              | 73 (12), 7977      | 2005 |
| <i>VPS34</i>                      | P-inositol-3-kinase         | 0.91 | 1.21 |      | 1.17 | attenuated            | Bruckmann    | Microbiology                        | 146 ( Pt 11), 2755 | 2000 |
| <i>XOG1 / EXG1</i>                | exoglucanase                | 0.56 | 1.03 | 0.91 | 1.20 | normal                | Gonzalez     | Microbiology                        | 143 ( Pt 9), 3023  | 1997 |
| <i>YHB1</i>                       | flavohe moglobin            | 1.41 | 1.67 |      | 1.11 | attenuated            | Hromatka     | Molecular Biology of the Cell       | 16, 10, 4814       | 2005 |
| <i>YVH1</i>                       | protein phosphatase         | 0.89 | 1.00 | 0.77 | 1.03 | attenuated            | Hanaoka      | Microbiology                        | 151 (Pt 7), 2223   | 2005 |
| <i>YWP1 / PGA24 / FLO1 / TEP1</i> | putative cell wall protein  | 1.77 | 1.11 | 1.29 | 1.12 | normal                | Granger      | Microbiology                        | 151 (Pt 5), 1631   | 2005 |
