# Supplementary material for: Genome-wide analysis of Candida albicans gene expression patterns during infection of the mammalian kidney
Source: PubMed Central journal article supplement (PMC2698078; doi:10.1016/j.fgb.2008.10.012), 2009-02
Supplement: mmc12.pdf [file mmc12.pdf]

## PCR primers used in this study

| <b>Primer</b> | <b>Sequence (5' to 3')</b> |
|---------------|----------------------------|
| EFB1-5'       | gctgctaaaggtccaaaacc       |
| EFB1-3'       | catcccatggttgacatcc        |
| DIP51.5F-5'   | cagctcataatgcagaagaagg     |
| DIP51.5F-3'   | agaagacctgttcccaatgc       |
| FAA4-5'       | gaccgaaacttgctaatgc        |
| FAA4-3'       | ttgatcccaccaaagtacc        |
| CTA1-5'       | ttggccacacaagaaatacc       |
| CTA1-3'       | agcagcttgtcaacttcagc       |
| FRP3-5'       | gtttgaattggccgttg          |
| FRP3-3'       | acttgaatagcagcccaagc       |
| IPF14618-5'   | aggaccaactcttttgagg        |
| IPF14618-3'   | cagcagcttcagtgacaagg       |
