# Supplementary material for: Genome-wide analysis of Candida albicans gene expression patterns during infection of the mammalian kidney
Source: PubMed Central journal article supplement (PMC2698078; doi:10.1016/j.fgb.2008.10.012), 2009-02

## Microarray data comparing growth in RPMI and YPD in vitro

Genome-wide comparisons of *in vivo*-grown and YPD-grown *C. albicans* cells.

Functional categories containing up-regulated genes in each comparison are shown:

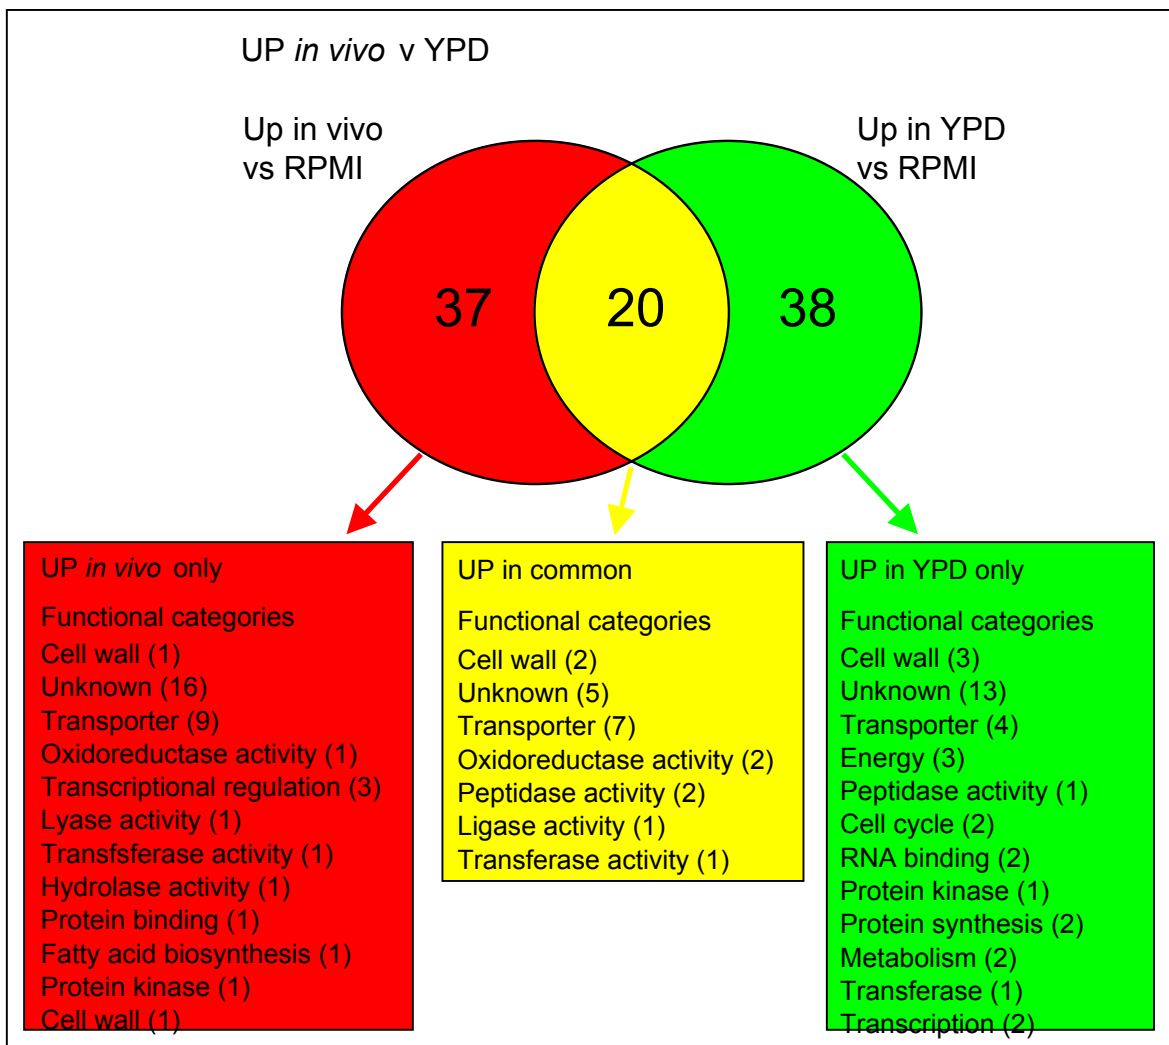

Supplement: mmc13.pdf [file mmc13.pdf]
