# Supplementary material for: Genome-wide analysis of Candida albicans gene expression patterns during infection of the mammalian kidney
Source: PubMed Central journal article supplement (PMC2698078; doi:10.1016/j.fgb.2008.10.012), 2009-02

### Integrity of RNA preps from fungal cells infecting kidney

The integrity of RNA preparations from fungal cells isolated from rabbit kidneys was confirmed by agarose gel electrophoresis:

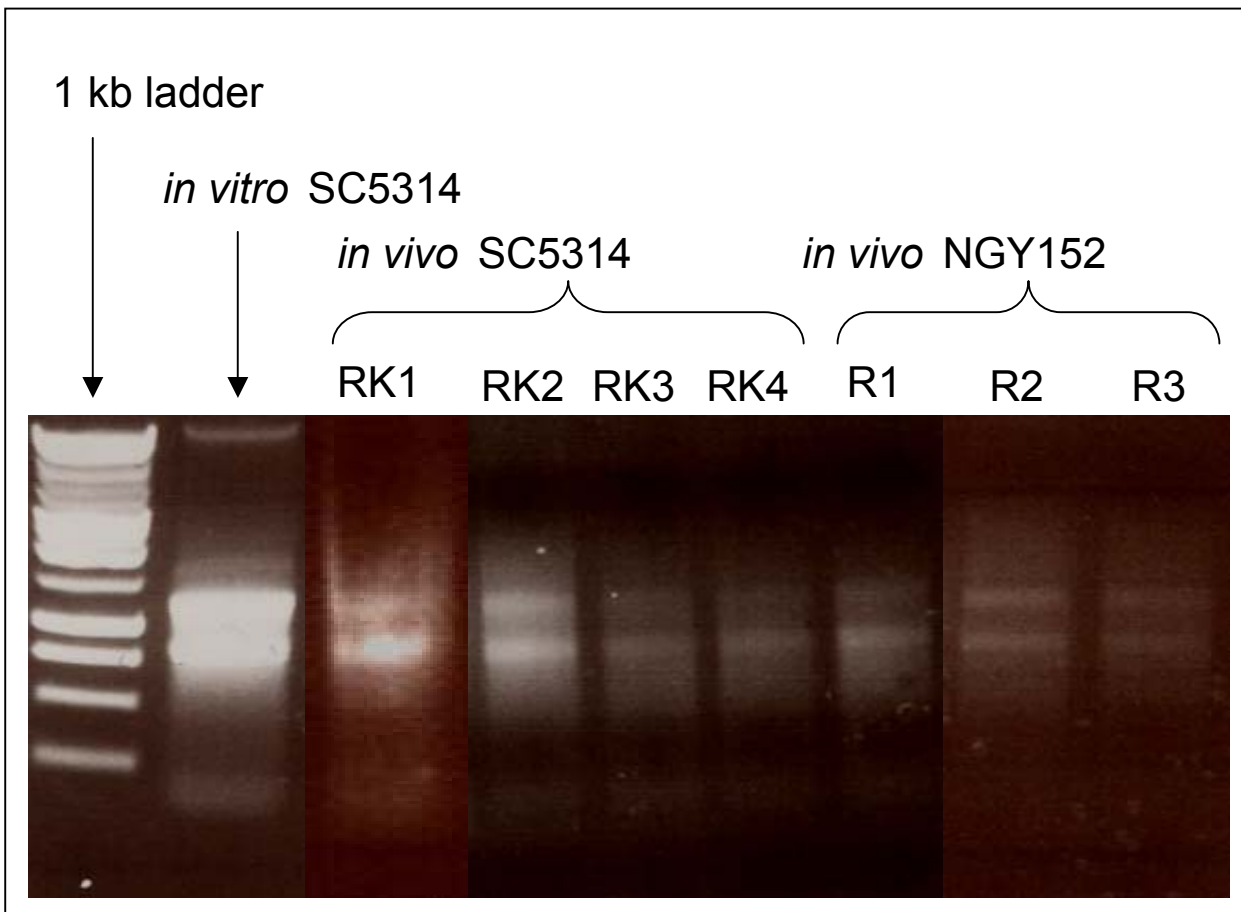

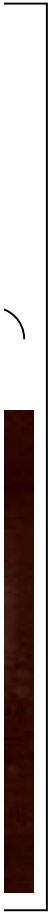

Supplement: mmc14.pdf [file mmc14.pdf]
