# Supplementary material for: Genome-wide analysis of Candida albicans gene expression patterns during infection of the mammalian kidney
Source: PubMed Central journal article supplement (PMC2698078; doi:10.1016/j.fgb.2008.10.012), 2009-02

qRT-PCR of transcript levels in SC5314 and NGY152

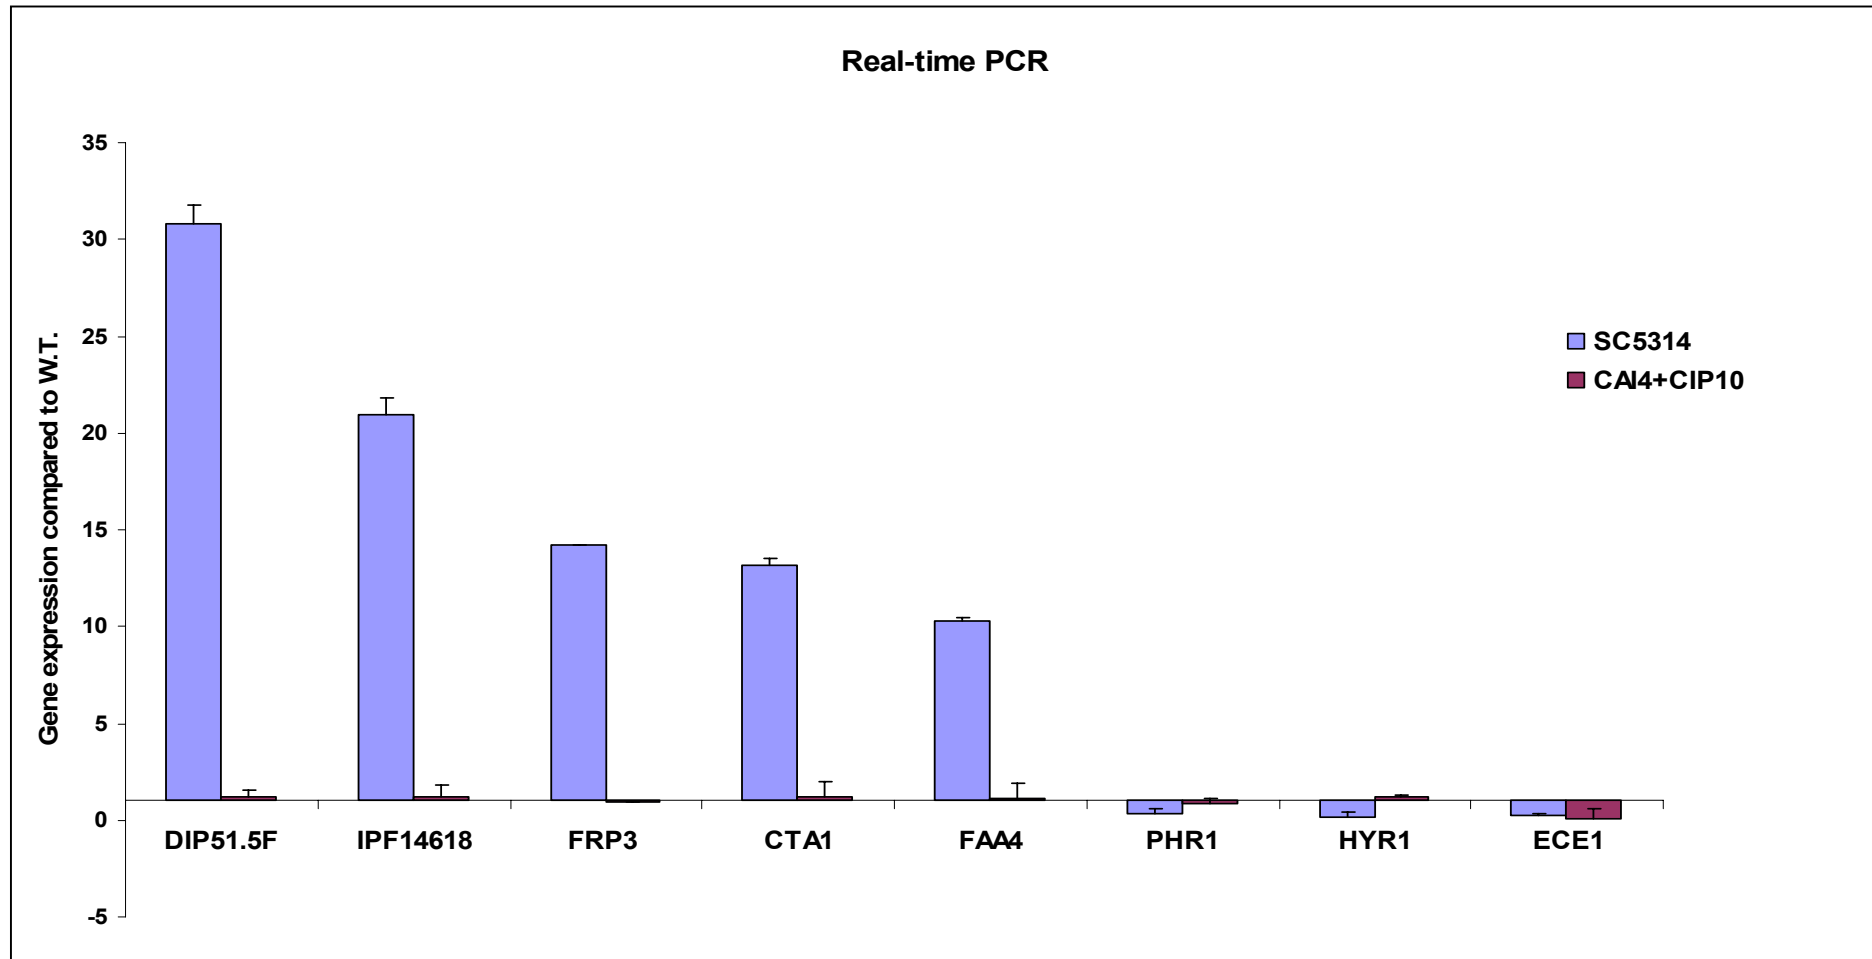

Supplement: mmc15.pdf [file mmc15.pdf]
