# Supplementary material for: Genome-wide analysis of Candida albicans gene expression patterns during infection of the mammalian kidney
Source: Fungal Genet Biol. 2009 Feb;46(2):210–9. doi: 10.1016/j.fgb.2008.10.012 (PMC2698078; doi:10.1016/j.fgb.2008.10.012)
Supplement: Supplementary Data 7 [file mmc7.pdf]

All Genes

Regulation of NGY152 genes in rabbit kidney versus NGY152 genes in RPMI 1640

| Rabbit<br>Kidney | 1<br>RK1A | 1<br>RK1B | 2<br>RK2A | 2<br>RK2B | 3<br>RK3A | 3<br>RK3B | File Name (RK1-April)(RK2-April)(CAI4+CIP1CAI4+CIP1CAI4+CIP1C_38 RV Dexcel.txt | Systematic Normalized                                     | Normalized | Normalized | Normalized | Normalized | Normalized | Common | Map   | Description Function | C. albicans orf19.#                                       | IPF#  | Name       | MIPS Category                                                                       | GO molecular function          |
|------------------|-----------|-----------|-----------|-----------|-----------|-----------|--------------------------------------------------------------------------------|-----------------------------------------------------------|------------|------------|------------|------------|------------|--------|-------|----------------------|-----------------------------------------------------------|-------|------------|-------------------------------------------------------------------------------------|--------------------------------|
| CA0001           | 1.1       | 1.0       | 1.0       | 0.9       | 1.1       | 1.0       | IPF19501                                                                       | complemer unknown function                                |            |            |            |            |            |        | 19501 | IPF19501             | 23221..246 component of the anaphase prom                 | 19501 | IPF19501   | No significant S.c. match                                                           |                                |
| CA0002           | 0.9       | 0.9       | 1.0       | 1.0       | 1.1       | 1.0       | DOC1                                                                           | 31023..322 putative zinc amino peptidase (by homology)    |            |            |            |            |            |        | 12212 | CaDOC1               | 23221..246 component of the anaphase prom                 | 12212 | CaDOC1     | CELL CYCLE AND DNA PROCESSING ""PROTEIN FATE [folding modification destination]     | enzyme regulator activity      |
| CA0003           | 1.1       | 1.1       | 1.0       | 1.0       | 1.2       | 1.0       | IPF19484                                                                       | 64471..654 unknown function                               |            |            |            |            |            |        | 19484 | IPF19484             | 31023..322 putative zinc amino peptidase (by homology)    | 19484 | IPF19484   | PROTEIN FATE [folding modification destination]                                     |                                |
| CA0005           | 1.0       | 1.0       | 0.8       | 0.7       | 0.9       | 0.9       | IPF14994                                                                       | 78709..797 unknown function                               |            |            |            |            |            |        | 14994 | IPF14994             | 64471..654 unknown function                               | 14994 | IPF14994   | UNCLASSIFIED PROTEINS                                                               | molecular_function unknown     |
| CA0006           | 1.0       | 1.0       | 1.0       | 1.1       | 1.0       | 0.9       | IPF2072                                                                        | complemer unknown function                                |            |            |            |            |            |        | 2072  | IPF2072              | 78709..797 unknown function                               | 2072  | IPF2072    | UNCLASSIFIED PROTEINS                                                               | molecular_function unknown     |
| CA0007           | 1.0       | 1.0       | 1.0       | 1.0       | 1.0       | 1.0       | IPF12061                                                                       | complemer 1,4-butanediol diacrylate esterase              |            |            |            |            |            |        | 12061 | IPF12061             | complemer unknown function                                | 12061 | IPF12061   | No significant S.c. match                                                           |                                |
| CA0008           | 1.0       | 1.1       | 1.0       | 1.0       | 1.0       | 1.0       | IPF12110                                                                       | complemer 1,4-butanediol diacrylate esterase              |            |            |            |            |            |        | 12110 | IPF12110             | complemer 1,4-butanediol diacrylate esterase              | 12110 | IPF12110   | No significant S.c. match                                                           |                                |
| CA0009           | 0.9       | 1.0       | 1.0       | 1.0       | 1.0       | 1.0       | IPF11382                                                                       | complemer unknown function                                |            |            |            |            |            |        | 11382 | IPF11382             | complemer unknown function                                | 11382 | IPF11382   | No significant S.c. match                                                           |                                |
| CA0010           | 1.1       | 1.0       | 1.2       | 1.1       | 1.2       | 1.0       | IPF16036                                                                       | 130706..13 similar to Saccharomyces cerevisi              |            |            |            |            |            |        | 16036 | IPF16036             | 130706..13 similar to Saccharomyces cerevisi              | 16036 | IPF16036   | PROTEIN FATE [folding modification destination]                                     | transporter activity           |
| CA0011           | 1.0       | 1.0       | 1.0       | 1.0       | 0.9       | 1.0       | IPF17430                                                                       | complemer possible zinc protease (by homolo               |            |            |            |            |            |        | 17430 | IPF17430             | complemer possible zinc protease (by homolo               | 17430 | IPF17430   | PROTEIN FATE [folding modification destination]                                     | molecular_function unknown     |
| CA0012           | 1.0       | 1.1       | 1.0       | 1.1       | 1.1       | 1.0       | IPF19448                                                                       | 153218..15 similar to Saccharomyces cerevisi              |            |            |            |            |            |        | 19448 | IPF19448             | 153218..15 similar to Saccharomyces cerevisi              | 19448 | IPF19448   | Lipid fatty-acid and isoprenoid metabolism                                          | transferase activity           |
| CA0013           | 1.0       | 1.0       | 0.9       | 0.9       | 1.0       | 1.0       | MAK32                                                                          | 164949..16 sugar kinase (by homology)                     |            |            |            |            |            |        | 14749 | CaMAK32              | 164949..16 sugar kinase (by homology)                     | 14749 | CaMAK32    | TRANSPOSABLE ELEMENTS VIRAL AND PLASMID PROTEINS                                    | molecular_function unknown     |
| CA0014           | 1.0       | 1.0       | 1.0       | 0.9       | 1.0       | 1.0       | IPF13368                                                                       | complemer unknown function                                |            |            |            |            |            |        | 13368 | IPF13368             | complemer unknown function                                | 13368 | IPF13368   | No significant S.c. match                                                           |                                |
| CA0015           | 1.0       | 0.9       | 1.0       | 1.0       | 1.0       | 1.0       | PHO87.5EOC                                                                     | 180249..18 Member of the phosphate permea                 |            |            |            |            |            |        | 19824 | CaPHO87              | 180249..18 Member of the phosphate permea                 | 19824 | CaPHO87    | Phosphate metabolism REGULATION OF/INTERACTION WITH CELLULAR ENVIRONMENT TRANSPOR   |                                |
| CA0016           | 1.0       | 0.9       | 1.0       | 1.0       | 0.9       | 1.0       | CAN5.5                                                                         | 196184..19 basic-amino-acid permease, 5-prime end (by l   |            |            |            |            |            |        | 14582 | CaCAN5.5             | 196184..19 basic-amino-acid permease, 5-prime end (by l   | 14582 | CaCAN5.5   | No significant S.c. match                                                           |                                |
| CA0017           | 1.0       | 1.0       | 0.9       | 1.0       | 0.9       | 1.0       | IPF17811                                                                       | 208654..20 unknown function                               |            |            |            |            |            |        | 17811 | IPF17811             | 208654..20 unknown function                               | 17811 | IPF17811   | No significant S.c. match                                                           |                                |
| CA0018           | 1.1       | 1.1       | 1.0       | 1.0       | 1.0       | 1.0       | IPF19435                                                                       | complemer unknown function                                |            |            |            |            |            |        | 19435 | IPF19435             | complemer unknown function                                | 19435 | IPF19435   | No significant S.c. match                                                           |                                |
| CA0019           | 1.0       | 1.0       | 1.0       | 1.0       | 0.9       | 1.0       | IPF17799                                                                       | 229761..23 unknown function                               |            |            |            |            |            |        | 17799 | IPF17799             | 229761..23 unknown function                               | 17799 | IPF17799   | UNCLASSIFIED PROTEINS                                                               | molecular_function unknown     |
| CA0020           | 0.9       | 0.9       | 1.0       | 1.0       | 1.0       | 1.0       | IPF7046                                                                        | complemer unknown function                                |            |            |            |            |            |        | 7046  | IPF7046              | complemer unknown function                                | 7046  | IPF7046    | UNCLASSIFIED PROTEINS                                                               | protein binding                |
| CA0021           | 1.1       | 1.1       | 0.9       | 1.0       | 1.2       | 1.1       | IPF19425                                                                       | complemer unknown function                                |            |            |            |            |            |        | 19425 | IPF19425             | complemer unknown function                                | 19425 | IPF19425   | No significant S.c. match                                                           |                                |
| CA0022           | 1.0       | 1.0       | 1.0       | 1.0       | 1.1       | 1.0       | IPF19421                                                                       | complemer unknown function                                |            |            |            |            |            |        | 19421 | IPF19421             | complemer unknown function                                | 19421 | IPF19421   | No significant S.c. match                                                           |                                |
| CA0023           | 1.0       | 1.0       | 1.1       | 1.0       | 1.1       | 0.9       | IPF6922                                                                        | complemer unknown function                                |            |            |            |            |            |        | 6922  | IPF6922              | complemer unknown function                                | 6922  | IPF6922    | No significant S.c. match                                                           |                                |
| CA0024           | 1.0       | 1.0       | 0.9       | 1.0       | 1.0       | 1.0       | RPC31.5EOC                                                                     | 271877..27 DNA-directed RNA polymerase III, orf19.1034    |            |            |            |            |            |        | 14908 | CaRPC31.             | 271877..27 DNA-directed RNA polymerase III, orf19.1034    | 14908 | CaRPC31.   | No significant S.c. match                                                           |                                |
| CA0025           | 1.1       | 1.0       | 1.0       | 1.0       | 1.1       | 1.0       | IPF17945                                                                       | 281103..28 unknown function                               |            |            |            |            |            |        | 17945 | IPF17945             | 281103..28 unknown function                               | 17945 | IPF17945   | No significant S.c. match                                                           |                                |
| CA0026           | 1.1       | 1.0       | 1.0       | 1.0       | 0.9       | 1.0       | IPF16843                                                                       | complemer unknown function                                |            |            |            |            |            |        | 16843 | IPF16843             | complemer unknown function                                | 16843 | IPF16843   | UNCLASSIFIED PROTEINS                                                               | molecular_function unknown     |
| CA0027           | 1.0       | 1.1       | 1.0       | 1.0       | 1.0       | 1.0       | RCL1                                                                           | 345150..34 RNA 3'-terminal phosphate cyclas               |            |            |            |            |            |        | 9148  | CaRCL1               | 345150..34 RNA 3'-terminal phosphate cyclas               | 9148  | CaRCL1     | TRANSCRIPTION                                                                       | molecular_function unknown     |
| CA0028           | 1.0       | 1.0       | 0.9       | 1.0       | 1.1       | 1.0       | IPF15345                                                                       | 350274..35 peptidyl-IRNA-hydrolase (by homo               |            |            |            |            |            |        | 15345 | IPF15345             | 350274..35 peptidyl-IRNA-hydrolase (by homo               | 15345 | IPF15345   | No significant S.c. match                                                           |                                |
| CA0029           | 1.0       | 1.0       | 0.9       | 1.0       | 0.9       | 1.0       | PET56                                                                          | complemer ribosomal RNA methylase (by hon                 |            |            |            |            |            |        | 13421 | CaPET56              | complemer ribosomal RNA methylase (by hon                 | 13421 | CaPET56    | TRANSCRIPTION SUBCELLULAR LOCALISATION                                              | transferase activity           |
| CA0030           | 1.0       | 1.0       | 0.9       | 1.0       | 1.1       | 1.0       | IPF17790                                                                       | 367177..36 unknown function                               |            |            |            |            |            |        | 17790 | IPF17790             | 367177..36 unknown function                               | 17790 | IPF17790   | TRANSCRIPTION SUBCELLULAR LOCALISATION                                              | RNA binding                    |
| CA0031           | 1.0       | 0.8       | 0.9       | 0.9       | 0.9       | 1.1       | COX7                                                                           | complemer Subunit VII of cytochrome c oxidas              |            |            |            |            |            |        | 15250 | CaCOX7               | complemer Subunit VII of cytochrome c oxidas              | 15250 | CaCOX7     | ENERGY ""PROTEIN FATE [folding modification destination]                            | oxidoreductase activity        |
| CA0032           | 1.0       | 1.1       | 0.9       | 1.0       | 1.1       | 1.0       | IPF15248                                                                       | complemer zinc finger protein (by homology)               |            |            |            |            |            |        | 15248 | IPF15248             | complemer zinc finger protein (by homology)               | 15248 | IPF15248   | UNCLASSIFIED PROTEINS                                                               | molecular_function unknown     |
| CA0034           | 1.0       | 1.0       | 1.0       | 1.0       | 0.9       | 1.0       | IPF8016                                                                        | complemer unknown function                                |            |            |            |            |            |        | 8016  | IPF8016              | complemer unknown function                                | 8016  | IPF8016    | No significant S.c. match                                                           |                                |
| CA0035           | 0.9       | 1.0       | 1.0       | 1.1       | 1.1       | 1.1       | PRC3                                                                           | 418049..41 Carboxypeptidase Y precursor (by orf19.1001    |            |            |            |            |            |        | 7205  | CaPRC3               | 418049..41 Carboxypeptidase Y precursor (by orf19.1001    | 7205  | CaPRC3     | PROTEIN FATE [folding modification destination]                                     | peptidase activity             |
| CA0036           | 1.3       | 1.2       | 1.0       | 1.0       | 1.1       | 1.1       | IPF19377                                                                       | 437969..43 unknown function                               |            |            |            |            |            |        | 19377 | IPF19377             | 437969..43 unknown function                               | 19377 | IPF19377   | No significant S.c. match                                                           |                                |
| CA0037           | 1.0       | 0.8       | 1.1       | 1.6       | 1.2       | 1.1       | IPF17652.3                                                                     | 443186..44 reverse transcriptase, 3-prime end orf19.6078  |            |            |            |            |            |        | 17652 | IPF17652.            | 443186..44 reverse transcriptase, 3-prime end orf19.6078  | 17652 | IPF17652.  | No significant S.c. match                                                           |                                |
| CA0038           | 1.1       | 1.3       | 1.0       | 0.9       | 1.0       | 1.0       | CYC1                                                                           | 451363..45 cytochrome-c isoform 1                         |            |            |            |            |            |        | 17424 | CaCYC1               | 451363..45 cytochrome-c isoform 1                         | 17424 | CaCYC1     | ENERGY SUBCELLULAR LOCALISATION                                                     | transporter activity           |
| CA0039           | 1.0       | 1.0       | 1.1       | 1.0       | 1.0       | 1.0       | IPF3998                                                                        | 466972..46 unknown function                               |            |            |            |            |            |        | 3998  | IPF3998              | 466972..46 unknown function                               | 3998  | IPF3998    | No significant S.c. match                                                           |                                |
| CA0040           | 1.0       | 1.0       | 0.9       | 1.0       | 1.0       | 1.0       | IPF15632                                                                       | complemer unknown function                                |            |            |            |            |            |        | 15632 | IPF15632             | complemer unknown function                                | 15632 | IPF15632   | No significant S.c. match                                                           |                                |
| CA0041           | 1.1       | 1.1       | 1.0       | 1.0       | 1.1       | 1.0       | IPF10360                                                                       | complemer unknown function                                |            |            |            |            |            |        | 10360 | IPF10360             | complemer unknown function                                | 10360 | IPF10360   | UNCLASSIFIED PROTEINS                                                               | molecular_function unknown     |
| CA0043           | 1.0       | 1.0       | 1.0       | 1.1       | 0.9       | 1.0       | HRD1                                                                           | 498030..49 Involved in degradation of Hmg2p               |            |            |            |            |            |        | 17505 | CaHRD1               | 498030..49 Involved in degradation of Hmg2p               | 17505 | CaHRD1     | PROTEIN FATE [folding modification destination]                                     | ligase activity                |
| CA0044           | 1.0       | 1.1       | 1.0       | 1.0       | 1.0       | 1.0       | IPF17347                                                                       | complemer unknown function                                |            |            |            |            |            |        | 17347 | IPF17347             | complemer unknown function                                | 17347 | IPF17347   | TRANSCRIPTION                                                                       |                                |
| CA0045           | 0.8       | 0.8       | 1.1       | 1.0       | 1.2       | 1.2       | IPF8985.5EOC                                                                   | complemer unknown function, 5-prime end                   |            |            |            |            |            |        | 8985  | IPF8985.5            | complemer unknown function, 5-prime end                   | 8985  | IPF8985.5  | No significant S.c. match                                                           |                                |
| CA0046           | 1.0       | 1.0       | 1.0       | 1.0       | 0.9       | 1.0       | IPF14850                                                                       | complemer Hypothetical protein                            |            |            |            |            |            |        | 14850 | IPF14850             | complemer Hypothetical protein                            | 14850 | IPF14850   | No significant S.c. match                                                           |                                |
| CA0047           | 1.0       | 0.9       | 0.9       | 1.0       | 1.0       | 1.0       | PTC2                                                                           | 556497..55 Protein phosphatase type 2C (by l              |            |            |            |            |            |        | 17818 | CaPTC2               | 556497..55 Protein phosphatase type 2C (by l              | 17818 | CaPTC2     | CLASSIFICATION NOT YET CLEAR-CUT                                                    | protein phosphatase activity   |
| CA0048           | 1.0       | 1.0       | 1.0       | 0.9       | 1.0       | 1.0       | TIF4631                                                                        | complemer mRNA cap-binding protein (by hon                |            |            |            |            |            |        | 17394 | CaTIF4631            | complemer mRNA cap-binding protein (by hon                | 17394 | CaTIF4631  | PROTEIN SYNTHESIS SUBCELLULAR LOCALISATION                                          | translation regulator activity |
| CA0049           | 1.0       | 1.1       | 1.1       | 1.0       | 1.0       | 1.0       | IPF3908                                                                        | 586067..58 unknown function                               |            |            |            |            |            |        | 3908  | IPF3908              | 586067..58 unknown function                               | 3908  | IPF3908    | UNCLASSIFIED PROTEINS                                                               |                                |
| CA0050           | 0.9       | 0.9       | 1.0       | 1.1       | 0.9       | 1.0       | CTA25                                                                          | 595830..59 transcriptional activation                     |            |            |            |            |            |        | 10947 | CaCTA25              | 595830..59 transcriptional activation                     | 10947 | CaCTA25    | No significant S.c. match                                                           |                                |
| CA0051           | 1.1       | 1.0       | 1.0       | 1.1       | 1.0       | 0.8       | IPF4443                                                                        | 607166..60 unknown function                               |            |            |            |            |            |        | 4443  | IPF4443              | 607166..60 unknown function                               | 4443  | IPF4443    | No significant S.c. match                                                           |                                |
| CA0052           | 1.1       | 1.1       | 1.1       | 1.0       | 1.0       | 1.1       | IPF19567                                                                       | complemer Unknown function                                |            |            |            |            |            |        | 19567 | IPF19567             | complemer Unknown function                                | 19567 | IPF19567   | UNCLASSIFIED PROTEINS                                                               | molecular_function unknown     |
| CA0053           | 1.0       | 0.9       | 1.0       | 1.1       | 1.0       | 1.1       | IFA16                                                                          | 621045..62 unknown function                               |            |            |            |            |            |        | 19573 | CaIFA16              | 621045..62 unknown function                               | 19573 | CaIFA16    | Nucleotide metabolism CELL CYCLE AND DNA PROCESSING CELLULAR COMMUNICATION/SIGNAL T |                                |
| CA0054           | 1.0       | 1.0       | 1.0       | 0.9       | 1.0       | 0.9       | RIB4.3                                                                         | complemer 6,7-dimethyl-8-ribityllumazine synthase, 3-prin |            |            |            |            |            |        | 4908  | CaRIB4.3             | complemer 6,7-dimethyl-8-ribityllumazine synthase, 3-prin | 4908  | CaRIB4.3   | Metabolism of vitamins cofactors and prosthetic groups                              | isomerase activity             |
| CA0055           | 1.1       | 1.0       | 1.0       | 1.0       | 1.0       | 1.0       | IPF12442                                                                       | complemer unknown function                                |            |            |            |            |            |        | 12442 | IPF12442             | complemer unknown function                                | 12442 | IPF12442   | UNCLASSIFIED PROTEINS                                                               | molecular_function unknown     |
| CA0056           | 1.0       | 1.1       | 1.0       | 1.0       | 1.1       | 0.9       | IPF15839                                                                       | complemer unknown function                                |            |            |            |            |            |        | 15839 | IPF15839             | complemer unknown function                                | 15839 | IPF15839   | No significant S.c. match                                                           |                                |
| CA0057           | 1.0       | 1.0       | 1.0       | 1.0       | 1.0       | 1.0       | IPF3767                                                                        | complemer unknown function                                |            |            |            |            |            |        | 3767  | IPF3767              | complemer unknown function                                | 3767  | IPF3767    | UNCLASSIFIED PROTEINS                                                               | molecular_function unknown     |
| CA0058           | 0.9       | 1.0       | 1.0       | 1.1       | 1.0       | 1.0       | IPF3770                                                                        | 691896..69 similar to Saccharomyces cerevisiae Kar3p kii  |            |            |            |            |            |        | 3770  | IPF3770              | 691896..69 similar to Saccharomyces cerevisiae Kar3p kii  | 3770  | IPF3770    | CELL CYCLE AND DNA PROCESSING ""PROTEIN FATE [folding modification destination]     | CELLULAR T                     |
| CA0059           | 1.1       | 1.0       | 0.9       | 1.0       | 1.1       | 1.0       | IPF17840                                                                       | 694776..69 unknown function                               |            |            |            |            |            |        | 17840 | IPF17840             | 694776..69 unknown function                               | 17840 | IPF17840   | UNCLASSIFIED PROTEINS                                                               |                                |
| CA0060           | 1.0       | 1.0       | 1.0       | 1.0       | 1.0       | 1.0       | IPF13661                                                                       | complemer unknown function                                |            |            |            |            |            |        | 13661 | IPF13661             | complemer unknown function                                | 13661 | IPF13661   | UNCLASSIFIED PROTEINS                                                               | molecular_function unknown     |
| CA0061           | 1.0       | 1.0       | 1.1       | 1.0       | 1.0       | 1.0       | IPF19315.3F                                                                    | complemer unknown function, 3-prime end                   |            |            |            |            |            |        | 19316 | IPF19315.            | complemer unknown function, 3-prime end                   | 19316 | IPF19315.  | No significant S.c. match                                                           |                                |
| CA0062           | 1.1       | 1.1       | 1.1       | 1.1       | 1.0       | 1.0       | IPF19315.5F                                                                    | complemer unknown function, 5-prime end                   |            |            |            |            |            |        | 19315 | IPF19315.            | complemer unknown function, 5-prime end                   | 19315 | IPF19315.  | No significant S.c. match                                                           |                                |
| CA0063           | 0.9       | 0.9       | 1.0       | 1.1       | 1.1       | 1.0       | IPF19310.3F                                                                    | 719768..72 unknown function, 3-prime end                  |            |            |            |            |            |        | 19310 | IPF19310.            | 719768..72 unknown function, 3-prime end                  | 19310 | IPF19310.  | No significant S.c. match                                                           |                                |
| CA0064           | 1.0       | 1.0       | 1.0       | 1.1       | 1.1       | 1.0       | IPF19308.3F                                                                    | complemer unknown function, 3-prime end                   |            |            |            |            |            |        | 19308 | IPF19308.            | complemer unknown function, 3-prime end                   | 19308 | IPF19308.  | No significant S.c. match                                                           |                                |
| CA0066           | 1.0       | 0.9       | 1.0       | 1.0       | 1.0       | 1.1       | IPF15051                                                                       | 751455..75 unknown function                               |            |            |            |            |            |        | 15051 | IPF15051             | 751455..75 unknown function                               | 15051 | IPF15051   | No significant S.c. match                                                           |                                |
| CA0067           | 1.1       | 1.1       | 1.0       | 1.1       | 0.9       | 1.0       | IPF13904                                                                       | 756390..75 farnesyl cysteine carboxyl-methyltr            |            |            |            |            |            |        | 13904 | IPF13904             | 756390..75 farnesyl cysteine carboxyl-methyltr            | 13904 | IPF13904</ |                                                                                     |                                |

|        |     |     |     |     |     |     |              |                                                         |             |       |            |                                                                      |                                                              |
|--------|-----|-----|-----|-----|-----|-----|--------------|---------------------------------------------------------|-------------|-------|------------|----------------------------------------------------------------------|--------------------------------------------------------------|
| CA0069 | 1.0 | 0.9 | 1.0 | 0.9 | 1.0 | 1.0 | IPF19295.5EC | 767511..76 unknown function, internal fragmer           | orf19.6468  | 19295 | IPF19295.5 | No significant S.c. match                                            |                                                              |
| CA0070 | 1.1 | 1.0 | 0.9 | 1.0 | 1.1 | 1.1 | IPF19295.3F  | 768787..77 unknown function, 3-prime end                | orf19.6469  | 19294 | IPF19295.3 | UNCLASSIFIED PROTEINS                                                |                                                              |
| CA0071 | 1.0 | 1.0 | 1.0 | 1.0 | 1.0 | 1.0 | IPF19290.3   | complemer unknown function, 3-prime end                 | orf19.621   | 19290 | IPF19290.3 | No significant S.c. match                                            |                                                              |
| CA0072 | 1.0 | 1.1 | 1.0 | 1.0 | 1.1 | 1.1 | IPF19283.3F  | complemer unknown function, 3-prime end                 | orf19.625   | 19284 | IPF19283.3 | No significant S.c. match                                            |                                                              |
| CA0073 | 1.0 | 1.0 | 1.0 | 1.0 | 1.1 | 1.0 | IPF19283.5F  | complemer unknown function, 5-prime end                 |             | 19283 | IPF19283.5 | No significant S.c. match                                            |                                                              |
| CA0074 | 1.0 | 1.0 | 1.2 | 1.0 | 1.1 | 1.1 | IFD7         | 786781..78 Putative aryl-alcohol dehydrogenase          | orf19.629   | 17480 | CaIFD7     | C-compound and carbohydrate metabolism                               | ENERGY                                                       |
| CA0075 | 1.0 | 1.0 | 1.0 | 1.0 | 1.0 | 1.0 | IFA24.3      | 789556..79 unknown function, 3-prime end                | orf19.9164  | 17205 | CaIFA24.3  | UNCLASSIFIED PROTEINS                                                |                                                              |
| CA0076 | 1.1 | 1.0 | 1.0 | 1.0 | 1.0 | 1.1 | IPF8866      | complemer unknown function                              | orf19.4906  | 8866  | IPF8866    | No significant S.c. match                                            |                                                              |
| CA0077 | 1.0 | 1.1 | 1.0 | 1.1 | 1.0 | 1.0 | IPF1239      | 801371..80 unknown function                             |             | 1239  | IPF1239    | PROTEIN FATE [folding modification destination]                      | ""SUBCELLULAR LOCALISATION                                   |
| CA0078 | 0.9 | 0.9 | 1.0 | 1.1 | 1.0 | 1.0 | CTA27        | complemer transcriptional activation                    |             | 17380 | CaCTA27    | No significant S.c. match                                            |                                                              |
| CA0079 | 0.9 | 1.0 | 1.0 | 1.1 | 1.0 | 1.0 | IPF14323     | complemer unknown function                              | orf19.4730  | 14323 | IPF14323   | UNCLASSIFIED PROTEINS                                                | molecular_function unknown                                   |
| CA0080 | 1.0 | 1.0 | 1.1 | 1.1 | 1.1 | 1.1 | IPF11378     | 826422..82 unknown function                             | orf19.632   | 11378 | IPF11378   | No significant S.c. match                                            |                                                              |
| CA0081 | 1.0 | 1.0 | 1.0 | 1.0 | 1.0 | 1.0 | IPF11379     | complemer unknown function                              | orf19.633   | 11379 | IPF11379   | No significant S.c. match                                            |                                                              |
| CA0083 | 1.2 | 1.4 | 1.2 | 1.5 | 1.3 | 1.3 | PHO84        | complemer high-affinity inorganic phosphate/t           | orf19.655   | 5438  | CaPHO84    | Phosphate metabolism                                                 | CELLULAR TRANSPORT AND TRANSPORT MECHANISMS REGULATION OF/IN |
| CA0084 | 1.1 | 1.0 | 1.1 | 1.1 | 1.0 | 1.1 | NAB3         | complemer polyadenylated RNA-binding prote              | orf19.12971 | 4338  | CaNAB3     | TRANSCRIPTION SUBCELLULAR LOCALISATION                               | molecular_function unknown                                   |
| CA0085 | 1.1 | 1.2 | 1.0 | 1.1 | 1.1 | 1.0 | IPF16201     | 851158..85 unknown function                             | orf19.693   | 16201 | IPF16201   | No significant S.c. match                                            |                                                              |
| CA0086 | 1.1 | 0.9 | 1.0 | 1.0 | 1.0 | 1.0 | IPF16598     | complemer unknown function                              | orf19.7781  | 16598 | IPF16598   | Lipid fatty-acid and isoprenoid metabolism                           | transferase activity                                         |
| CA0087 | 0.9 | 1.0 | 1.0 | 1.1 | 1.0 | 1.1 | SMF11        | 858028..85 manganese transporter (by homol              | orf19.4690  | 14122 | CaSMF11    | PROTEIN FATE [folding modification destination]                      | ""CELLULAR TRANSPORT AND TRANSPORT MECHAN                    |
| CA0088 | 1.0 | 1.0 | 1.0 | 0.9 | 1.0 | 1.0 | IPF7349      | 866183..86 similar to Saccharomyces unnam               | orf19.579   | 7349  | IPF7349    | Metabolism of vitamins cofactors and prosthetic groups               | transferase activity                                         |
| CA0089 | 0.9 | 0.9 | 1.0 | 1.1 | 1.0 | 1.0 | MRPL3        | complemer ribosomal protein of the large sub            | orf19.5064  | 19552 | CaMRPL3    | PROTEIN SYNTHESIS SUBCELLULAR LOCALISATION                           | structural molecule activity                                 |
| CA0090 | 1.0 | 1.0 | 0.9 | 1.1 | 1.0 | 1.1 | UBP13        | 875277..87 ubiquitin carboxyl-terminal hydrola          | orf19.2026  | 4114  | CaUBP13    | PROTEIN FATE [folding modification destination]                      | peptidase activity                                           |
| CA0092 | 1.0 | 1.0 | 1.0 | 1.0 | 0.9 | 0.9 | IPF8268.3F   | 890368..89 member of the FRP family of prote            | orf19.1571  | 8269  | IPF8268.3f | C-compound and carbohydrate metabolism                               |                                                              |
| CA0093 | 0.9 | 0.9 | 1.0 | 1.0 | 1.0 | 1.0 | IPF19980.REF | complemer putative lipase (by homology)                 | orf19.7747  | 10462 | IPF19980.r | Lipid fatty-acid and isoprenoid metabolism                           |                                                              |
| CA0094 | 1.0 | 1.0 | 0.9 | 1.0 | 1.0 | 1.0 | IPF12819     | 932035..93 unknown function                             | orf19.3213  | 12819 | IPF12819   | UNCLASSIFIED PROTEINS                                                |                                                              |
| CA0095 | 1.0 | 0.9 | 1.0 | 1.0 | 0.9 | 0.9 | ALG11        | 936850..93 required for asparagine-linked olig          | orf19.3468  | 19249 | CaALG11    | C-compound and carbohydrate metabolism                               | ""PROTEIN FATE [folding mtransferase activity                |
| CA0096 | 1.0 | 1.0 | 1.1 | 0.9 | 1.0 | 1.0 | IPF13409     | complemer unknown function                              | orf19.751   | 13409 | IPF13409   | UNCLASSIFIED PROTEINS                                                | molecular_function unknown                                   |
| CA0097 | 0.8 | 1.0 | 1.0 | 1.1 | 1.0 | 1.1 | IPF13290     | 949021..94 unknown function                             | orf19.5314  | 13290 | IPF13290   | PROTEIN SYNTHESIS SUBCELLULAR LOCALISATION                           |                                                              |
| CA0098 | 1.0 | 1.0 | 1.0 | 1.1 | 1.0 | 1.0 | IPF16479     | 954432..95 unknown function                             | orf19.2319  | 16479 | IPF16479   | UNCLASSIFIED PROTEINS                                                | molecular_function unknown                                   |
| CA0100 | 1.1 | 0.9 | 1.0 | 1.0 | 1.0 | 1.0 | IPF11569     | complemer unknown function                              | orf19.7682  | 11569 | IPF11569   | No significant S.c. match                                            |                                                              |
| CA0101 | 1.0 | 1.0 | 1.0 | 0.9 | 1.0 | 0.9 | IPF10105     | complemer RNA polymerase-like (by homolog               | orf19.232   | 10105 | IPF10105   | TRANSCRIPTION SUBCELLULAR LOCALISATION                               | transcription regulator activity                             |
| CA0102 | 1.0 | 0.9 | 1.0 | 0.9 | 1.0 | 1.0 | IPF16695     | complemer unknown function                              | orf19.736   | 16695 | IPF16695   | C-compound and carbohydrate metabolism                               | TRANSCRIPTION SUBCELLtranscription regulator activity        |
| CA0103 | 1.0 | 1.0 | 0.9 | 0.9 | 1.0 | 1.1 | IPF17515     | 1017198..1 unknown function                             | orf19.749   | 17515 | IPF17515   | PROTEIN FATE [folding modification destination]                      | ""CELLULAR TRANSPORT AND TRANSPORT MECHAN                    |
| CA0104 | 1.0 | 1.0 | 1.1 | 0.9 | 1.1 | 1.0 | RBT4         | complemer repressed by TUP1 prc repressed               | orf19.1358; | 8153  | CaRBT4     | CELL FATE Hypha-specific                                             |                                                              |
| CA0105 | 0.9 | 0.9 | 1.1 | 0.9 | 1.0 | 1.0 | IPF17529.3   | complemer unknown function, 3-prime end                 | orf19.786   | 17529 | IPF17529.3 | No significant S.c. match                                            |                                                              |
| CA0106 | 0.9 | 1.0 | 1.0 | 0.9 | 1.0 | 1.0 | IPF16308     | complemer unknown function                              | orf19.1133; | 16308 | IPF16308   | No significant S.c. match                                            |                                                              |
| CA0107 | 1.0 | 1.1 | 1.0 | 0.9 | 0.9 | 1.0 | POL3.5EOC    | complemer DNA Polymerase III, 5-prime end               | orf19.5183  | 17951 | CaPOL3.5c  | CELL CYCLE AND DNA PROCESSING SUBCELLULAR LOCALISATIO                | nucleotidyltransferase activity                              |
| CA0108 | 1.1 | 1.2 | 1.1 | 1.1 | 1.2 | 1.1 | HIK1.5EOC    | 1035652..1 histidine kinase, 5-prime end                | orf19.5181  | 19235 | CaHIK1.5e  | C-compound and carbohydrate metabolism                               | CELLULAR COMMUNICATION/SIGNAL TRANSDUCTION ME                |
| CA0109 | 1.0 | 1.0 | 1.0 | 1.0 | 0.8 | 1.0 | IPF13723     | complemer unknown function                              | orf19.7892  | 13723 | IPF13723   | No significant S.c. match                                            |                                                              |
| CA0110 | 0.9 | 1.0 | 1.0 | 1.0 | 1.1 | 1.1 | IPF17190     | 1043744..1 unknown function                             | orf19.11351 | 17190 | IPF17190   | No significant S.c. match                                            |                                                              |
| CA0111 | 0.9 | 1.0 | 1.0 | 1.0 | 1.0 | 0.8 | IPF16830     | 1049792..1 similar to Saccharomyces cerevisi            | orf19.4151  | 16830 | IPF16830   | Lipid fatty-acid and isoprenoid metabolism                           | ""CELL CYCLE AND DNA PRhydrolase activity                    |
| CA0112 | 1.0 | 1.1 | 0.9 | 1.0 | 1.1 | 1.0 | IPF17358     | complemer unknown function                              | orf19.5754  | 17358 | IPF17358   | UNCLASSIFIED PROTEINS                                                | molecular_function unknown                                   |
| CA0113 | 1.0 | 0.9 | 1.0 | 0.9 | 1.0 | 1.0 | AUT2         | 1070596..1 anchor protein mediateing attachm            | orf19.9938  | 14934 | CaAUT2     | PROTEIN FATE [folding modification destination]                      | ""CELLULAR TRANSPprotein binding                             |
| CA0114 | 1.0 | 1.1 | 1.1 | 1.0 | 1.0 | 1.0 | SSU72        | 1072101..1 suppressor of cs mutant of sua7(b            | orf19.9939  | 14932 | CaSSU72    | TRANSCRIPTION SUBCELLULAR LOCALISATION                               | protein phosphatase activity                                 |
| CA0116 | 0.9 | 0.9 | 1.0 | 0.9 | 0.9 | 1.0 | IPF17975     | 1082630..1 unknown function                             | orf19.915   | 17975 | IPF17975   | No significant S.c. match                                            |                                                              |
| CA0117 | 0.9 | 1.0 | 1.0 | 1.0 | 1.0 | 1.0 | IPF19231     | 1085355..1 unknown function                             | orf19.916   | 19231 | IPF19231   | UNCLASSIFIED PROTEINS                                                | molecular_function unknown                                   |
| CA0118 | 1.1 | 1.0 | 1.0 | 1.0 | 1.0 | 1.0 | IPF16430.3   | 1088771..1 similar to Saccharomyces cerevisiae Qcr6p ut |             | 16430 | IPF16430.3 | ENERGY SUBCELLULAR LOCALISATION                                      | transporter activity,oxidoreductase                          |
| CA0119 | 1.0 | 1.0 | 1.0 | 1.0 | 1.0 | 0.9 | RMT2         | 1092915..1 N-delta-arginine methyltransferase           | orf19.920   | 16809 | CaRMT2     | Amino acid metabolism                                                | transferase activity                                         |
| CA0120 | 1.1 | 1.0 | 1.0 | 0.9 | 0.9 | 1.0 | IPF19593     | complemer similar to Saccharomyces cerevisiae Ulp1p Sr  |             | 19593 | IPF19593   | PROTEIN FATE [folding modification destination]                      | peptidase activity                                           |
| CA0121 | 1.0 | 1.0 | 1.0 | 1.0 | 1.0 | 1.0 | IPF17048     | 1104885..1 unknown function                             | orf19.983   | 17048 | IPF17048   | UNCLASSIFIED PROTEINS                                                | molecular_function unknown                                   |
| CA0122 | 0.9 | 1.0 | 0.9 | 1.0 | 1.0 | 1.0 | SNF4         | complemer Nuclear regulatory protein (by hom            | orf19.1319  | 6988  | CaSNF4     | C-compound and carbohydrate metabolism                               | TRANSCRIPTION ""CELL R enzyme regulator activity             |
| CA0123 | 0.8 | 1.0 | 0.8 | 0.9 | 1.0 | 1.1 | MXR1         | 1122583..1 methionine sulfoxide reductase               | orf19.9576  | 4117  | CaMXR1     | Amino acid metabolism                                                | ""CELL RESCUE DEFENSE AND VIRULENCE oxidoreductase activity  |
| CA0124 | 1.0 | 1.0 | 0.9 | 1.1 | 1.0 | 0.9 | RFC5         | 1123567..1 DNA replication factor C (by homo            | orf19.9577  | 4118  | CaRFC5     | CELL CYCLE AND DNA PROCESSING SUBCELLULAR LOCALISATIO                | molecular_function unknown                                   |
| CA0125 | 1.0 | 0.9 | 1.0 | 1.0 | 1.0 | 1.0 | IPF4119      | complemer unknown function                              | orf19.9578  | 4119  | IPF4119    | No significant S.c. match                                            |                                                              |
| CA0126 | 1.0 | 1.0 | 0.9 | 1.0 | 1.2 | 1.1 | IPF4284      | complemer unknown function                              | orf19.8177  | 4284  | IPF4284    | UNCLASSIFIED PROTEINS                                                | molecular_function unknown                                   |
| CA0127 | 0.9 | 0.5 | 1.2 | 1.2 | 1.2 | 1.6 | HXX2.3F      | complemer hexokinase II, 3-prime end (by hor            | orf19.8176  | 4286  | CaHXX2.3f  | C-compound and carbohydrate metabolism                               | ENERGY SUBCELLULAR Ltransferase activity                     |
| CA0129 | 1.1 | 1.1 | 1.0 | 1.0 | 1.0 | 0.9 | IPF10495     | complemer unknown function                              | orf19.246   | 10495 | IPF10495   | UNCLASSIFIED PROTEINS                                                | molecular_function unknown                                   |
| CA0130 | 1.1 | 1.0 | 1.0 | 1.0 | 1.0 | 1.0 | IPF4470      | complemer unknown function                              | orf19.3533  | 4470  | IPF4470    | UNCLASSIFIED PROTEINS                                                | molecular_function unknown                                   |
| CA0131 | 1.0 | 1.0 | 1.0 | 1.0 | 1.0 | 1.0 | IPF13402     | complemer unknown function                              | orf19.36    | 13402 | IPF13402   | UNCLASSIFIED PROTEINS                                                | molecular_function unknown                                   |
| CA0132 | 1.1 | 1.2 | 1.0 | 1.0 | 1.0 | 1.0 | SPT10        | 1160657..1 Transcription regulatory protein (b)         | orf19.2361  | 16032 | CaSPT10    | TRANSCRIPTION SUBCELLULAR LOCALISATION                               | transferase activity                                         |
| CA0133 | 1.0 | 1.0 | 1.0 | 1.0 | 1.0 | 1.1 | IPF3746      | 1166485..1 unknown function                             | orf19.1007  | 3746  | IPF3746    | TRANSCRIPTION                                                        | transferase activity                                         |
| CA0136 | 0.9 | 1.0 | 1.0 | 1.0 | 0.9 | 1.0 | IFH1         | complemer Dioxxygenase (by homology)                    | orf19.9207  | 10444 | CaIFH1     | CELL RESCUE DEFENSE AND VIRULENCE                                    |                                                              |
| CA0137 | 1.0 | 1.0 | 1.0 | 1.1 | 1.0 | 1.0 | SEC232       | 1186849..1 Component of COPII coat (by hom              | orf19.9206  | 10446 | CaSEC232   | CELLULAR TRANSPORT AND TRANSPORT MECHANISMS SUBCELLULAR LOCALISATION |                                                              |
| CA0138 | 1.2 | 1.6 | 0.7 | 0.6 | 0.8 | 0.8 | INH1         | 1195101..1 Inhibitor of mitochondrial ATPase            |             | 7584  | CaINH1     | No significant S.c. match                                            |                                                              |
| CA0139 | 0.9 | 0.9 | 1.0 | 1.0 | 0.9 | 1.0 | RUD3         | 1204769..1 Suppressor of uso1-1 transport de            | orf19.1418; | 17098 | CaRUD3     | CELLULAR TRANSPORT AND TRANSPORT MECHANISMS SUBCELL                  | molecular_function unknown                                   |
| CA0140 | 1.0 | 1.0 | 1.0 | 1.0 | 1.1 | 1.1 | MDM1.3       | complemer intermediate filament protein, 3-pri          | orf19.1009' | 19597 | CaMDM1.3   | CELL CYCLE AND DNA PROCESSING SUBCELLULAR LOCALISATIO                | structural molecule activity                                 |
| CA0141 | 1.1 | 1.0 | 1.0 | 1.0 | 1.0 | 1.0 | IPF17520.53E | 1228742..1 unknown function, internal fragmer           | orf19.1021  | 17520 | IPF17520.5 | No significant S.c. match                                            |                                                              |
| CA0142 | 1.0 | 1.0 | 1.0 | 1.0 | 0.9 | 1.0 | CSL4         | 1235322..1 Involved in kinetochore-related fun          | orf19.1026  | 17757 | CaCSL4     | Nucleotide metabolism                                                | RNA binding                                                  |
| CA0143 | 1.0 | 1.0 | 1.0 | 1.0 | 1.0 | 1.1 | IPF19195.5F  | 1265314..1 putative amino acid or GABA perr             | orf19.153   | 19195 | IPF19195.5 | Lipid fatty-acid and isoprenoid metabolism                           | ""TRANSPORT FACILITATION                                     |
| CA0144 | 0.8 | 0.9 | 1.1 | 1.0 | 0.9 | 1.0 | IPF19195.3F  | 1265891..1 putative amino acid or GABA perr             | orf19.151   | 17861 | IPF19195.3 | Lipid fatty-acid and isoprenoid metabolism                           | ""TRANSPORT FACILITATIO                                      |
| CA0145 | 1.0 | 1.0 | 1.0 | 1.0 | 1.0 | 1.1 | IPF11449     | 1272911..1 unknown function                             |             | 11449 | IPF11449   | No significant S.c. match                                            |                                                              |
| CA0146 | 1.0 | 1.0 | 1.0 | 0.9 | 1.0 | 1.0 | IPF9689      | 1274376..1 unknown function                             | orf19.1113; | 9689  | IPF9689    | No significant S.c. match                                            |                                                              |
| CA0147 | 1.0 | 1.0 | 1.0 | 1.0 | 1.0 | 1.1 | IPF9690      | complemer unknown function                              | orf19.1113; | 9690  | IPF9690    | UNCLASSIFIED PROTEINS                                                |                                                              |

|        |     |     |     |     |     |     |              |                                                              |                  |                                                                                            |                                      |
|--------|-----|-----|-----|-----|-----|-----|--------------|--------------------------------------------------------------|------------------|--------------------------------------------------------------------------------------------|--------------------------------------|
| CA0148 | 1.0 | 0.9 | 1.1 | 1.0 | 1.0 | 1.0 | POP1         | 1278472..1 protein component of ribonuclease orf19.2404      | 14929 CaPOP1     | TRANSCRIPTION SUBCELLULAR LOCALISATION                                                     | RNA binding                          |
| CA0149 | 1.0 | 1.0 | 1.0 | 1.0 | 1.0 | 1.1 | VPS34        | 1288898..1 1-phosphatidylinositol :phosphatid orf19.6243     | 17276 CaVPS34    | Lipid fatty-acid and isoprenoid metabolism ""CELLULAR TRANSPORT A protein kinase activity  |                                      |
| CA0150 | 1.0 | 1.0 | 1.0 | 1.0 | 1.0 | 0.9 | CDC123       | 1296609..1 similar to Saccharomyces cerevisi orf19.10231     | 6404 CDC123      | CELL CYCLE AND DNA PROCESSING                                                              | molecular_function unknown           |
| CA0151 | 1.0 | 1.0 | 1.0 | 1.0 | 1.0 | 1.0 | IPF15923.5EC | complemer unknown function, 5-prime end orf19.177            | 15923 IPF15923.5 | CELL CYCLE AND DNA PROCESSING CELL FATE SUBCELLULAR LOCALISATION                           |                                      |
| CA0152 | 1.1 | 1.0 | 1.0 | 1.0 | 1.0 | 1.1 | IPF16368.3F  | complemer unknown function, 3-prime end orf19.254            | 16370 IPF16368.3 | No significant S.c. match                                                                  |                                      |
| CA0153 | 1.0 | 1.0 | 1.0 | 1.2 | 1.1 | 1.1 | IPF16368.5F  | complemer Unknown function, 5-prime end orf19.255            | 16368 IPF16368.5 | No significant S.c. match                                                                  |                                      |
| CA0154 | 1.1 | 1.1 | 1.0 | 1.0 | 1.1 | 1.1 | CPH1         | complemer Transcription factor Ste12-like torf19.4433        | 5536 CaCPH1      | TRANSCRIPTION REGULATION OF/INTERACTION WITH CELLULAR DNA binding,transcription regulato   |                                      |
| CA0155 | 1.1 | 1.0 | 1.0 | 1.0 | 1.0 | 1.1 | RPT6         | complemer 26S proteasome regulatory subun orf19.11071        | 13102 CaRPT6     | CELL CYCLE AND DNA PROCESSING ""PROTEIN FATE [folding modifi peptidase activity            |                                      |
| CA0156 | 1.1 | 1.3 | 1.3 | 1.2 | 1.1 | 1.1 | SCW1         | 1355380..1 glucanase (by homolog mannopro orf19.9345         | 15898 CaSCW1     | CLASSIFICATION NOT YET CLEAR-CUT                                                           | hydrolase activity                   |
| CA0157 | 1.0 | 1.0 | 1.1 | 1.0 | 0.9 | 1.1 | IPF19178.3F  | complemer unknown function, 3-prime end orf19.1073           | 19179 IPF19178.3 | No significant S.c. match                                                                  |                                      |
| CA0158 | 1.0 | 1.0 | 1.0 | 1.0 | 1.0 | 1.0 | IPF19178.5EC | complemer unknown function, 3-prime end orf19.1073           | 19178 IPF19178.5 | No significant S.c. match                                                                  |                                      |
| CA0159 | 1.0 | 1.0 | 1.0 | 1.0 | 1.0 | 1.0 | TUB4.3       | complemer gamma-tubulin, 3-prime end orf19.1238              | 12541 CaTUB4.3   | CELL CYCLE AND DNA PROCESSING SUBCELLULAR LOCALISATION structural molecule activity        |                                      |
| CA0160 | 1.0 | 0.9 | 1.0 | 1.1 | 1.0 | 0.9 | GAP7.5EOC    | complemer general amino acid permease, 5-p orf19.10701       | 11171 CaGAP7.5   | Amino acid metabolism CELLULAR TRANSPORT AND TRANSPORT MECHANISMS SUBCELLULAR LO           |                                      |
| CA0161 | 1.0 | 1.0 | 0.9 | 1.0 | 1.0 | 1.1 | RMS1         | complemer (putative) transcriptional regulator orf19.1017    | 10588 CaRMS1     | TRANSCRIPTION SUBCELLULAR LOCALISATION                                                     | molecular_function unknown           |
| CA0162 | 0.9 | 1.0 | 1.0 | 1.0 | 1.1 | 1.0 | IPF19168     | complemer unknown function orf19.5616                        | 19168 IPF19168   | No significant S.c. match                                                                  |                                      |
| CA0163 | 1.1 | 1.1 | 1.0 | 1.1 | 1.0 | 1.1 | AYR2         | 1387498..1 1-acyl dihydroxyacetone phosphat orf19.5615       | 15021 CaAYR2     | C-compound and carbohydrate metabolism CELL FATE                                           |                                      |
| CA0164 | 1.0 | 1.0 | 0.9 | 1.0 | 1.0 | 1.0 | IPF11694     | complemer similar to Saccharomyces cerevisi orf19.4335       | 11694 IPF11694   | TRANSPORT FACILITATION                                                                     | transporter activity                 |
| CA0165 | 1.0 | 1.0 | 1.0 | 1.0 | 1.0 | 1.0 | IPF19165.3   | complemer unknown function, 3-prime end orf19.1073           | 19165 IPF19165.3 | No significant S.c. match                                                                  |                                      |
| CA0166 | 1.0 | 1.0 | 1.0 | 1.0 | 1.0 | 1.1 | IPF19161.53E | complemer unknown function, internal fragment orf19.1075     | 19161 IPF19161.5 | No significant S.c. match                                                                  |                                      |
| CA0167 | 1.0 | 1.1 | 1.0 | 1.1 | 1.0 | 1.0 | IPF19160     | complemer unknown function orf19.1075                        | 19160 IPF19160   | No significant S.c. match                                                                  |                                      |
| CA0169 | 1.0 | 1.0 | 0.9 | 0.9 | 0.9 | 1.0 | RBT7         | complemer repressed by TUP1 orf19.10191                      | 14885 CaRBT7     | Nucleotide metabolism                                                                      |                                      |
| CA0170 | 1.0 | 0.9 | 1.1 | 1.0 | 0.9 | 1.0 | IPF15959     | 1442925..1 unknown function orf19.1105                       | 15959 IPF15959   | No significant S.c. match                                                                  |                                      |
| CA0171 | 0.9 | 0.5 | 1.1 | 0.8 | 1.0 | 0.7 | IPF15957     | complemer unknown function orf19.1126                        | 15957 IPF15957   | No significant S.c. match                                                                  |                                      |
| CA0172 | 1.0 | 1.1 | 1.1 | 1.0 | 1.0 | 1.0 | IPF19154     | 1451467..1 unknown function orf19.1127                       | 19154 IPF19154   | No significant S.c. match                                                                  |                                      |
| CA0173 | 0.9 | 1.0 | 1.1 | 1.0 | 1.0 | 1.0 | IPF6913      | complemer unknown function orf19.1127                        | 6913 IPF6913     | SUBCELLULAR LOCALISATION                                                                   |                                      |
| CA0174 | 0.9 | 1.0 | 1.1 | 1.1 | 0.9 | 0.9 | IPF11182.3EC | 1458377..1 unknown function, 3-prime end orf19.9970          | 11182 IPF11182.3 | UNCLASSIFIED PROTEINS                                                                      | hydrolase activity                   |
| CA0175 | 1.2 | 1.1 | 1.0 | 1.1 | 1.1 | 1.1 | NPL4         | complemer nuclear protein localization factor orf19.9970     | 19684 CaNPL4     | PROTEIN FATE [folding modification destination] ""CELLULAR TRANSP                          | protein binding,structural molecule  |
| CA0176 | 1.0 | 1.0 | 1.1 | 1.1 | 1.1 | 0.9 | IPF11388     | complemer unknown function orf19.8267                        | 11388 IPF11388   | UNCLASSIFIED PROTEINS                                                                      | DNA binding                          |
| CA0177 | 0.9 | 1.0 | 0.9 | 1.0 | 1.0 | 1.0 | IFL2         | 1473706..1 unknown function orf19.8268                       | 20048 CaIFL2     | CELL RESCUE DEFENSE AND VIRULENCE ""CELL FATE                                              |                                      |
| CA0178 | 0.9 | 1.1 | 1.0 | 1.1 | 1.0 | 1.0 | CDC6         | complemer Cell division control prc CDC6 prote orf19.1270    | 2017 CaCDC6      | CELL CYCLE AND DNA PROCESSING CONTROL OF CELLULAR ORC                                      | protein binding                      |
| CA0179 | 1.0 | 1.0 | 0.9 | 1.0 | 1.0 | 1.0 | DCP1         | 1486194..1 mRNA decapping enzyme (by hon orf19.423           | 10483 CaDCP1     | TRANSCRIPTION                                                                              | hydrolase activity                   |
| CA0180 | 1.0 | 1.0 | 1.1 | 1.0 | 1.0 | 1.0 | SPT20        | 1487158..1 transcription factor, member of the orf19.422     | 10486 CaSPT20    | TRANSCRIPTION SUBCELLULAR LOCALISATION                                                     | transcription regulator activity     |
| CA0181 | 1.1 | 1.0 | 1.1 | 1.0 | 1.0 | 1.1 | NOT3         | complemer unknown function orf19.2012                        | 15994 CaNOT3     | TRANSCRIPTION SUBCELLULAR LOCALISATION                                                     |                                      |
| CA0182 | 1.0 | 1.0 | 1.1 | 1.1 | 1.0 | 1.1 | IFI1         | 1504556..1 unknown function orf19.1130                       | 6166 CaIFI1      | CLASSIFICATION NOT YET CLEAR-CUT                                                           |                                      |
| CA0183 | 1.1 | 1.0 | 0.9 | 1.2 | 1.0 | 1.0 | CAP1         | 1525251..1 transcriptional activator Cap1 [Can orf19.9191    | 4242 CaCAP1      | TRANSCRIPTION ""CELL RESCUE DEFENSE AND VIRULENCE ""SUE DNA binding,transcription regulato |                                      |
| CA0184 | 1.1 | 1.2 | 1.0 | 1.0 | 1.0 | 1.0 | IPF19142     | complemer unknown function orf19.1146                        | 19142 IPF19142   | UNCLASSIFIED PROTEINS                                                                      |                                      |
| CA0185 | 1.0 | 1.1 | 1.0 | 1.1 | 1.1 | 1.1 | PLB4.5F      | 1545784..1 Phospholipase, 5-prime end (by hcorf19.9017       | 15731 CaPLB4.5f  | Lipid fatty-acid and isoprenoid metabolism ""Other virulence attributes                    |                                      |
| CA0186 | 1.0 | 0.9 | 1.1 | 1.0 | 1.0 | 1.0 | PLB4.3F      | 1546979..1 phospholipase, 3-prime end (by hcorf19.9018       | 15733 CaPLB4.3f  | Lipid fatty-acid and isoprenoid metabolism ""Other virulence attributes                    |                                      |
| CA0187 | 1.0 | 1.0 | 1.0 | 0.9 | 0.9 | 1.0 | IPF15734     | 1548674..1 unknown function orf19.9467                       | 15734 IPF15734   | No significant S.c. match                                                                  |                                      |
| CA0188 | 1.0 | 1.0 | 1.1 | 1.2 | 1.1 | 1.1 | IPF15442     | 1550839..1 unknown function orf19.9467                       | 15442 IPF15442   | UNCLASSIFIED PROTEINS                                                                      | molecular_function unknown           |
| CA0189 | 1.0 | 1.1 | 1.1 | 0.9 | 1.0 | 1.0 | IPF12201     | 1556912..1 Na+-nucleoside cotransporter (by orf19.11601      | 12201 IPF12201   | No significant S.c. match                                                                  |                                      |
| CA0190 | 1.1 | 1.1 | 1.1 | 1.0 | 1.0 | 1.0 | IPF14773     | 1564584..1 unknown function orf19.11071                      | 14773 IPF14773   | UNCLASSIFIED PROTEINS                                                                      | molecular_function unknown           |
| CA0191 | 1.0 | 1.0 | 1.0 | 1.0 | 1.0 | 1.0 | PEX7         | 1568044..1 peroxisomal import protein (by horf19.89          | 9594 CaPEX7      | PROTEIN FATE [folding modification destination] ""CELLULAR TRANSP                          | signal transducer activity           |
| CA0192 | 1.0 | 1.1 | 1.0 | 1.0 | 1.0 | 0.9 | IPF15134     | 1577818..1 Unknown function orf19.1177                       | 15134 IPF15134   | SUBCELLULAR LOCALISATION                                                                   | molecular_function unknown           |
| CA0193 | 1.0 | 1.0 | 1.0 | 0.9 | 0.9 | 1.0 | IPF6493      | 1583508..1 unknown function orf19.1541                       | 6493 IPF6493     | UNCLASSIFIED PROTEINS                                                                      |                                      |
| CA0194 | 1.0 | 0.9 | 1.0 | 1.0 | 1.0 | 1.0 | IPF16228     | 1589730..1 unknown function orf19.1140                       | 16228 IPF16228   | UNCLASSIFIED PROTEINS                                                                      | hydrolase activity                   |
| CA0195 | 1.1 | 1.1 | 1.0 | 1.1 | 1.0 | 1.0 | IPF12688     | 1590754..1 unknown function orf19.1140                       | 12688 IPF12688   | Amino acid metabolism Nucleotide metabolism Purine ribonucleotide m                        | molecular_function unknown           |
| CA0196 | 1.1 | 1.1 | 1.0 | 1.0 | 1.0 | 1.0 | IPF15799     | 1598544..1 unknown function orf19.1651                       | 15799 IPF15799   | UNCLASSIFIED PROTEINS                                                                      |                                      |
| CA0197 | 1.0 | 1.0 | 1.0 | 1.0 | 1.0 | 1.0 | IPF9787      | complemer similar to Saccharomyces cerevisi orf19.1934       | 9787 IPF9787     | TRANSCRIPTION                                                                              | DNA binding                          |
| CA0198 | 1.0 | 1.2 | 1.0 | 1.0 | 1.0 | 1.1 | IPF19685     | 1609514..1 unknown function orf19.9227                       | 19685 IPF19685   | UNCLASSIFIED PROTEINS                                                                      | molecular_function unknown           |
| CA0199 | 1.0 | 1.1 | 1.1 | 1.1 | 1.1 | 1.1 | KAP104       | complemer karyopherin-beta protein (by homo orf19.3556       | 16463 CaKAP104   | CELLULAR TRANSPORT AND TRANSPORT MECHANISMS SUBCELL nucleotidyltransferase activity        |                                      |
| CA0200 | 1.3 | 1.7 | 1.0 | 1.1 | 1.0 | 1.1 | IPF15119     | complemer unknown function orf19.9109                        | 15119 IPF15119   | CELLULAR TRANSPORT AND TRANSPORT MECHANISMS TRANSP                                         | transporter activity                 |
| CA0201 | 1.0 | 1.0 | 1.0 | 1.1 | 1.0 | 1.1 | IPF15116     | complemer Unknown function orf19.9108                        | 15116 IPF15116   | UNCLASSIFIED PROTEINS                                                                      | molecular_function unknown           |
| CA0202 | 1.0 | 0.9 | 1.0 | 1.0 | 0.9 | 0.9 | IPF19126     | complemer putative aminoacid transporter (by orf19.1210      | 19126 IPF19126   | TRANSPORT FACILITATION UNCLASSIFIED PROTEINS                                               | transporter activity                 |
| CA0203 | 1.0 | 1.0 | 1.0 | 1.0 | 1.0 | 1.0 | MID1         | 1638166..1 involved in Ca2+ influx during mati orf19.1072    | 12820 CaMID1     | REGULATION OF/INTERACTION WITH CELLULAR ENVIRONMENT C                                      | transporter activity                 |
| CA0204 | 1.0 | 1.1 | 1.1 | 1.1 | 1.2 | 1.0 | IKI3         | 1641499..1 killer toxin insensitive protein 3 (by orf19.1222 | 15693 CaIKI3     | CLASSIFICATION NOT YET CLEAR-CUT                                                           | transcription regulator activity     |
| CA0205 | 1.0 | 0.9 | 1.1 | 1.0 | 1.0 | 1.0 | DBF2         | complemer putative ser/thr protein kinase by lorf19.1223     | 13853 CaDBF2     | CELL CYCLE AND DNA PROCESSING TRANSCRIPTION                                                | protein kinase activity              |
| CA0206 | 1.1 | 1.0 | 1.0 | 1.0 | 1.0 | 1.0 | IPF14089     | 1675193..1 putative serine/threonine protein k orf19.1029    | 14089 IPF14089   | ENERGY CELL CYCLE AND DNA PROCESSING SUBCELLULAR LOCALISATION                              |                                      |
| CA0207 | 1.0 | 0.9 | 1.0 | 1.0 | 1.0 | 1.0 | IPF18002     | 1695412..1 Unknown function orf19.1226                       | 18002 IPF18002   | UNCLASSIFIED PROTEINS                                                                      |                                      |
| CA0208 | 1.0 | 0.9 | 1.0 | 1.0 | 0.9 | 1.0 | IPF19850     | 1697550..1 unknown function orf19.1227                       | 19850 IPF19850   | Amino acid metabolism TRANSCRIPTION SUBCELLULAR LOCALISATION UNCLASSIFIED PROTEINS         |                                      |
| CA0209 | 1.0 | 1.0 | 1.0 | 1.0 | 1.0 | 1.1 | HAP2         | 1699253..1 CCAAT-binding factor subunit (by orf19.1228       | 16519 CaHAP2     | TRANSCRIPTION SUBCELLULAR LOCALISATION                                                     | transcription regulator activity     |
| CA0210 | 1.0 | 1.0 | 0.9 | 0.9 | 1.0 | 1.1 | IPF4328      | complemer unknown function orf19.1297                        | 4328 IPF4328     | UNCLASSIFIED PROTEINS                                                                      | molecular_function unknown           |
| CA0211 | 1.1 | 1.0 | 1.1 | 0.9 | 1.0 | 0.9 | IPF4326      | complemer unknown function orf19.12971                       | 4326 IPF4326     | No significant S.c. match                                                                  |                                      |
| CA0212 | 1.0 | 1.0 | 1.1 | 0.9 | 0.9 | 1.0 | IPF4325      | 1705735..1 unknown function orf19.12961                      | 4325 IPF4325     | No significant S.c. match                                                                  |                                      |
| CA0213 | 0.9 | 1.0 | 1.0 | 1.0 | 1.0 | 1.0 | CDS1         | complemer CDP-diacylglycerol synthase (by horf19.1279        | 16312 CaCDS1     | Lipid fatty-acid and isoprenoid metabolism ""SUBCELLULAR LOCALISA                          | nucleotidyltransferase activity      |
| CA0214 | 1.0 | 1.0 | 1.0 | 1.0 | 1.0 | 0.9 | SCT11        | 1727719..1 Suppresses a choline-transport miorf19.1289       | 9596 CaSCT11     | TRANSPORT FACILITATION                                                                     | transferase activity                 |
| CA0215 | 1.0 | 0.9 | 1.0 | 1.1 | 1.0 | 1.0 | IPF15350     | 1733843..1 putative zinc finger transcription fa orf19.2745  | 15350 IPF15350   | Amino acid metabolism Nitrogen and sulphur metabolism ""Lipid fatty-a                      | transcription regulator activity,DNA |
| CA0216 | 1.1 | 1.0 | 1.0 | 0.9 | 0.9 | 1.0 | IPF11681     | complemer unknown function orf19.1682                        | 11681 IPF11681   | No significant S.c. match                                                                  |                                      |
| CA0217 | 0.9 | 1.0 | 1.0 | 1.0 | 1.0 | 1.0 | MNN4         | 1752492..1 regulates the mannosylphosphoryl orf19.849        | 19522 CaMNN4     | PROTEIN FATE [folding modification destination]                                            | molecular_function unknown           |
| CA0218 | 1.1 | 1.0 | 1.1 | 1.0 | 1.0 | 0.9 | IPF15294     | 1765941..1 unknown function orf19.6238                       | 15294 IPF15294   | No significant S.c. match                                                                  |                                      |
| CA0219 | 1.0 | 1.0 | 1.0 | 1.0 | 1.0 | 0.8 | YAP3         | complemer transcription factor of abZip transcr orf19.3193   | 19852 CaYAP3     | TRANSCRIPTION SUBCELLULAR LOCALISATION                                                     | DNA binding,transcription regulato   |
| CA0220 | 0.9 | 1.0 | 0.9 | 1.1 | 1.0 | 1.0 | ABZ1         | complemer para-aminobenzoate synthase (by orf19.1291         | 10474 CaABZ1     | Metabolism of vitamins cofactors and prosthetic groups                                     | lyase activity                       |

|        |     |     |     |     |     |     |              |                                                    |             |       |            |                                                                                      |                                           |
|--------|-----|-----|-----|-----|-----|-----|--------------|----------------------------------------------------|-------------|-------|------------|--------------------------------------------------------------------------------------|-------------------------------------------|
| CA0221 | 1.0 | 1.0 | 0.9 | 1.0 | 1.0 | 0.9 | PUS4         | 1785176..1 pseudouridine synthase (by homolo       | orf19.9509  | 16835 | CaPUS4     | Nucleotide metabolism CELL CYCLE AND DNA PROCESSING TRANS                            | lyase activity                            |
| CA0222 | 1.0 | 1.1 | 1.0 | 1.0 | 1.0 | 1.0 | IPF12141     | 1786478..1 unknown function                        | orf19.9508  | 12141 | IPF12141   | UNCLASSIFIED PROTEINS                                                                |                                           |
| CA0223 | 1.0 | 0.9 | 1.1 | 1.0 | 1.0 | 1.0 | VAS1         | complemer valyl-tRNA synthetase (by homolo         | orf19.1295  | 13980 | CaVAS1     | PROTEIN SYNTHESIS SUBCELLULAR LOCALISATION                                           | ligase activity                           |
| CA0224 | 1.0 | 1.1 | 1.0 | 1.0 | 1.1 | 1.1 | PRP31        | complemer pre-mRNA splicing protein (by hono       | orf19.1296  | 13982 | CaPRP31    | TRANSCRIPTION SUBCELLULAR LOCALISATION                                               | RNA binding                               |
| CA0225 | 0.9 | 1.0 | 1.0 | 1.1 | 1.0 | 1.0 | NUP84        | complemer nuclear pore protein (by homology        | orf19.1298  | 16027 | CaNUP84    | CELLULAR TRANSPORT AND TRANSPORT MECHANISMS CELL FA1                                 | structural molecule activity              |
| CA0226 | 1.1 | 0.9 | 1.0 | 1.0 | 1.1 | 1.0 | IPF16024     | 1805331..1 unknown function                        | orf19.1297  | 16024 | IPF16024   | UNCLASSIFIED PROTEINS                                                                |                                           |
| CA0227 | 1.0 | 1.0 | 1.0 | 1.1 | 1.0 | 1.0 | PHO23        | complemer Involved in transcriptional regulatio    | orf19.9328  | 6854  | CaPHO23    | TRANSCRIPTION                                                                        | hydrolase activity                        |
| CA0228 | 1.0 | 1.0 | 0.9 | 1.0 | 1.0 | 1.0 | IPT1         | complemer Mannosyl diphosphorylinositol cer        | orf19.1223  | 11674 | CaIPT1     | Lipid fatty-acid and isoprenoid metabolism ""                                        | CONTROL OF CELLULAR (transferase activity |
| CA0229 | 1.1 | 1.2 | 1.1 | 1.0 | 1.0 | 1.0 | IPF8147      | 1820547..1 unknown function                        | orf19.1358  | 8147  | IPF8147    | CELL FATE                                                                            |                                           |
| CA0230 | 1.0 | 1.0 | 1.0 | 0.9 | 1.1 | 1.0 | TOM37        | 1826653..1 Mitochondrial outer membrane imp        | orf19.1532  | 17420 | CaTOM37    | No significant S.c. match                                                            |                                           |
| CA0231 | 1.1 | 1.1 | 0.9 | 1.0 | 1.1 | 1.0 | RAD23        | complemer nucleotide excision repair protein       | (orf19.1494 | 16846 | CaRAD23    | CELL CYCLE AND DNA PROCESSING CONTROL OF CELLULAR OR                                 | DNA binding                               |
| CA0232 | 1.0 | 1.1 | 1.0 | 1.0 | 1.0 | 1.0 | IFA1         | 1837394..1 Unknown function                        | orf19.156   | 15128 | CaIFA1     | Nucleotide metabolism CELL CYCLE AND DNA PROCESSING CELLULAR COMMUNICATION/SIGNAL T  |                                           |
| CA0233 | 1.0 | 1.0 | 1.0 | 1.0 | 1.0 | 1.0 | URE2         | 1840615..1 Nitrogen catabolite repression regi     | orf19.7794  | 15126 | CaURE2     | Nitrogen and sulphur metabolism                                                      | transcription regulator activity          |
| CA0234 | 1.0 | 1.0 | 1.0 | 1.0 | 1.0 | 1.0 | IFA3         | 1842051..1 unknown function                        | orf19.7793  | 19598 | CaIFA3     | UNCLASSIFIED PROTEINS                                                                | molecular_function unknown                |
| CA0235 | 1.0 | 1.0 | 1.0 | 1.0 | 1.0 | 1.0 | HIS3         | complemer imidazole glycerol phosphate dehy        | orf19.7813  | 13420 | CaHIS3     | Amino acid metabolism SUBCELLULAR LOCALISATION                                       | lyase activity                            |
| CA0236 | 1.0 | 1.0 | 1.0 | 1.0 | 1.0 | 0.9 | MDM10        | 1853443..1 Involved in mitochondrial morphol       | orf19.7814  | 13419 | CaMDM10    | SUBCELLULAR LOCALISATION                                                             | molecular_function unknown                |
| CA0237 | 1.0 | 1.0 | 1.0 | 1.0 | 1.0 | 1.0 | IPF13416     | complemer Unknown function                         | orf19.7818  | 13416 | IPF13416   | SUBCELLULAR LOCALISATION                                                             | molecular_function unknown                |
| CA0238 | 0.9 | 1.1 | 1.0 | 1.1 | 1.1 | 1.0 | PHA2.3       | complemer prephenate dehydratase, 3-prime          | orf19.7864  | 10101 | CaPHA2.3   | Amino acid metabolism SUBCELLULAR LOCALISATION                                       | lyase activity                            |
| CA0239 | 1.0 | 1.0 | 1.0 | 1.0 | 0.9 | 0.9 | RPL9B        | complemer RPL9B ribosomal protein L9 by hor        | orf19.236   | 10099 | CaRPL9B    | PROTEIN SYNTHESIS SUBCELLULAR LOCALISATION                                           | structural molecule activity              |
| CA0241 | 1.1 | 1.1 | 1.0 | 1.0 | 1.0 | 1.0 | IPF15630     | complemer unknown function                         | orf19.3470  | 15630 | IPF15630   | UNCLASSIFIED PROTEINS                                                                | molecular_function unknown                |
| CA0242 | 1.1 | 1.0 | 1.0 | 1.1 | 1.0 | 0.9 | IPF12047     | complemer unknown function                         | orf19.3471  | 12047 | IPF12047   | No significant S.c. match                                                            |                                           |
| CA0243 | 0.9 | 0.9 | 1.1 | 1.0 | 1.0 | 1.0 | BSD2         | complemer Metal homeostasis protein (by hono       | orf19.5869  | 15266 | CaBSD2     | REGULATION OF/INTERACTION WITH CELLULAR ENVIRONMENT S                                | molecular_function unknown                |
| CA0244 | 0.9 | 1.1 | 1.1 | 1.0 | 1.1 | 1.0 | IPF19082     | 1890894..1 unknown function                        |             | 19082 | IPF19082   | No significant S.c. match                                                            |                                           |
| CA0245 | 1.0 | 0.9 | 1.0 | 1.0 | 0.9 | 1.0 | POL5         | 1892763..1 DNA polymerase V (by homology)          | orf19.1304  | 17372 | CaPOL5     | CLASSIFICATION NOT YET CLEAR-CUT                                                     | nucleotidyltransferase activity           |
| CA0246 | 1.2 | 1.1 | 1.0 | 0.9 | 1.0 | 0.9 | IPF14452.REF | 1896228..1 F1-ATPase epsilon subunit (by homology) |             | 17243 | IPF14452.r | No significant S.c. match                                                            |                                           |
| CA0247 | 0.9 | 0.9 | 1.0 | 1.0 | 1.0 | 1.0 | RIB21        | 1900939..1 DRAP deaminase (by homology)            | orf19.2788  | 7263  | CaRIB21    | Metabolism of vitamins cofactors and prosthetic groups                               |                                           |
| CA0248 | 1.0 | 0.9 | 1.1 | 1.0 | 0.9 | 0.9 | IPF7262      | complemer unknown function                         | orf19.2789  | 7262  | IPF7262    | No significant S.c. match                                                            |                                           |
| CA0249 | 1.2 | 1.1 | 1.0 | 1.0 | 1.1 | 1.0 | IPF19617     | 1906767..1 unknown function                        | orf19.1350  | 19617 | IPF19617   | No significant S.c. match                                                            |                                           |
| CA0250 | 0.9 | 1.0 | 1.0 | 1.1 | 1.1 | 0.9 | IPF17661     | complemer unknown function                         | orf19.1348  | 17661 | IPF17661   | No significant S.c. match                                                            |                                           |
| CA0251 | 1.0 | 1.0 | 1.0 | 1.0 | 1.0 | 1.0 | IPF9146      | complemer unknown function                         | orf19.1362  | 9146  | IPF9146    | No significant S.c. match                                                            |                                           |
| CA0252 | 1.0 | 0.9 | 1.1 | 1.1 | 1.0 | 1.1 | SBP1.5EOC    | complemer RNA binding protein-like, 5-prime        | orf19.1327  | 19078 | CaSBP1.5   | No significant S.c. match                                                            |                                           |
| CA0253 | 1.1 | 1.1 | 1.0 | 0.9 | 0.9 | 1.1 | FIL1         | 1921259..1 Putative mitochondrial ribosome r       | orf19.477   | 7101  | CaFIL1     | PROTEIN SYNTHESIS SUBCELLULAR LOCALISATION                                           | translation regulator activity            |
| CA0254 | 1.0 | 1.0 | 1.0 | 1.0 | 1.0 | 1.0 | IPF14968     | 1939294..1 unknown function                        | orf19.3461  | 14968 | IPF14968   | No significant S.c. match                                                            |                                           |
| CA0255 | 1.0 | 1.0 | 1.0 | 1.1 | 1.0 | 1.1 | IPF16558.3   | 1941150..1 putative transcription initiation fact  | orf19.735   | 16558 | IPF16558.  | CELL CYCLE AND DNA PROCESSING TRANSCRIPTION SUBCELLULAR LOCALISATION                 |                                           |
| CA0256 | 1.0 | 0.9 | 1.0 | 1.0 | 1.0 | 1.0 | IPF10309     | 1948932..1 unknown function                        | orf19.2278  | 10309 | IPF10309   | UNCLASSIFIED PROTEINS                                                                | molecular_function unknown                |
| CA0257 | 1.0 | 1.1 | 1.1 | 1.0 | 1.1 | 1.0 | IPF10079     | complemer unknown function                         | orf19.2280  | 10084 | IPF10079   | C-compound and carbohydrate metabolism ENERGY TRANSCRIPTION SUBCELLULAR LOCALISATION |                                           |
| CA0258 | 1.0 | 1.0 | 1.0 | 1.1 | 0.9 | 1.0 | IPF17112     | 1962316..1 thiosulfate sulfurtransferase (by h     | orf19.1356  | 17112 | IPF17112   | Nitrogen and sulphur metabolism ""CELL RESCUE DEFENSE AND VIR                        | transferase activity                      |
| CA0259 | 1.0 | 0.9 | 1.0 | 1.0 | 1.0 | 1.0 | SOL1         | complemer multicopy suppressor of los1-1           | orf19.1355  | 17111 | CaSOL1     | TRANSCRIPTION UNCLASSIFIED PROTEINS                                                  | molecular_function unknown                |
| CA0260 | 1.0 | 1.0 | 1.0 | 1.0 | 1.0 | 1.0 | IPF13683     | 1973066..1 unknown function                        | orf19.2547  | 13683 | IPF13683   | No significant S.c. match                                                            |                                           |
| CA0261 | 1.0 | 1.0 | 1.1 | 1.0 | 1.1 | 0.9 | LYS22        | 1981734..1 Homocitrate synthase (by homolo         | orf19.8394  | 3880  | CaLYS22    | Amino acid metabolism C-compound and carbohydrate metabolism SUE                     | transferase activity                      |
| CA0262 | 1.1 | 0.9 | 1.0 | 0.8 | 1.0 | 1.1 | IPF20054     | 1986390..1 unknown function                        | orf19.1407  | 20054 | IPF20054   | UNCLASSIFIED PROTEINS                                                                | molecular_function unknown                |
| CA0263 | 1.0 | 0.9 | 1.1 | 1.2 | 1.2 | 1.0 | GLK1         | complemer aldohexose specific glucokinase (        | torf19.1408 | 8388  | CaGLK1     | C-compound and carbohydrate metabolism ENERGY CELLULAR TRAN                          | transferase activity                      |
| CA0264 | 1.0 | 1.0 | 1.0 | 1.0 | 1.0 | 1.0 | IPF8434      | 1992595..1 unknown function                        |             | 8434  | IPF8434    | No significant S.c. match                                                            |                                           |
| CA0265 | 1.1 | 1.0 | 0.7 | 0.5 | 1.0 | 1.1 | STI1         | 2002146..2 stress-induced protein (by homolo       | orf19.1070  | 9198  | CaSTI1     | CELL RESCUE DEFENSE AND VIRULENCE ""CELL FATE                                        | chaperone activity                        |
| CA0266 | 0.9 | 1.0 | 1.0 | 1.0 | 0.9 | 0.9 | IPF17773     | complemer unknown function not specified [Candida  |             | 17773 | IPF17773   | No significant S.c. match                                                            |                                           |
| CA0267 | 0.9 | 1.0 | 1.0 | 1.1 | 1.0 | 1.0 | IPF12262     | 2020672..2 extracellular alpha-1,4-glucan (by      | orf19.9183  | 12262 | IPF12262   | No significant S.c. match                                                            |                                           |
| CA0268 | 1.1 | 1.1 | 1.0 | 1.4 | 1.3 | 1.3 | PUF2.EXON2   | complemer RNA-binding protein, exon 2 (by ho       | orf19.4262  | 15191 | CaPUF2.e   | CELL CYCLE AND DNA PROCESSING                                                        | RNA binding                               |
| CA0269 | 1.0 | 1.0 | 1.1 | 1.0 | 1.0 | 1.0 | PUF2.EXON1   | complemer RNA-binding protein (by homology         | orf19.4263  | 15189 | CaPUF2.e)  | No significant S.c. match                                                            |                                           |
| CA0270 | 1.1 | 0.9 | 1.1 | 1.0 | 1.2 | 0.9 | PRB2         | complemer Protease B, vacuolar (by homolo          | orf19.9783  | 12896 | CaPRB2     | PROTEIN FATE [folding modification destination] ""SUBCELLULAR LOCALISATION           |                                           |
| CA0271 | 1.1 | 1.1 | 0.9 | 1.0 | 1.0 | 0.9 | IPF12897     | complemer putative oxidoreductase (by homol        | orf19.9785  | 12897 | IPF12897   | C-compound and carbohydrate metabolism                                               |                                           |
| CA0272 | 1.0 | 1.0 | 1.0 | 1.0 | 0.9 | 1.0 | DPB11        | complemer DNA polymerase II complex (by h          | orf19.1434  | 17695 | CaDPB11    | CELL CYCLE AND DNA PROCESSING SUBCELLULAR LOCALISATIO                                | nucleotidyltransferase activity           |
| CA0273 | 1.2 | 0.9 | 1.0 | 1.0 | 1.0 | 1.1 | IPF19066     | 2039965..2 unknown function                        | orf19.1433  | 19066 | IPF19066   | UNCLASSIFIED PROTEINS                                                                |                                           |
| CA0274 | 1.1 | 1.1 | 1.0 | 0.9 | 1.0 | 1.0 | IPF15153     | 2045228..2 unknown function                        | orf19.1328  | 15153 | IPF15153   | CELL RESCUE DEFENSE AND VIRULENCE ""SUBCELLULAR LOCALISATION                         |                                           |
| CA0275 | 0.9 | 1.1 | 1.0 | 0.9 | 1.0 | 1.0 | NTA1         | complemer Amino-terminal amidase (by homo          | orf19.8470  | 14821 | CaNTA1     | PROTEIN FATE [folding modification destination] ""SUBCELLULAR LOC                    | hydrolase activity                        |
| CA0276 | 1.1 | 1.1 | 1.0 | 1.0 | 1.0 | 1.0 | IPF15015     | 2056178..2 unknown function                        | orf19.1305  | 15015 | IPF15015   | No significant S.c. match                                                            |                                           |
| CA0277 | 1.0 | 0.8 | 0.8 | 0.5 | 0.8 | 0.9 | RNH1         | 2059216..2 ribonuclease H (by homology)            | orf19.1305  | 12328 | CaRNH1     | Nucleotide metabolism CONTROL OF CELLULAR ORGANIZATION                               |                                           |
| CA0278 | 0.9 | 0.9 | 1.0 | 1.1 | 1.0 | 1.0 | IPF15772     | complemer unknown function                         |             | 15772 | IPF15772   | No significant S.c. match                                                            |                                           |
| CA0279 | 1.1 | 1.0 | 1.0 | 1.0 | 1.0 | 0.9 | IPF10568     | 2076229..2 unknown function                        | orf19.1440  | 10568 | IPF10568   | No significant S.c. match                                                            |                                           |
| CA0280 | 1.0 | 1.0 | 0.9 | 1.0 | 1.0 | 0.9 | IPF10566     | 2078226..2 unknown function                        | orf19.1439  | 10566 | IPF10566   | CELLULAR COMMUNICATION/SIGNAL TRANSDUCTION MECHANISM                                 | transferase activity                      |
| CA0281 | 1.0 | 1.0 | 1.0 | 1.0 | 0.9 | 0.9 | IPF10564.3   | complemer unknown function, 3-prime end            | orf19.1438  | 10565 | IPF10564.  | No significant S.c. match                                                            |                                           |
| CA0282 | 1.0 | 1.0 | 1.1 | 1.0 | 1.1 | 1.0 | IPF17417     | 2086004..2 Unknown function                        | orf19.1216  | 17417 | IPF17417   | CELL RESCUE DEFENSE AND VIRULENCE ""SUBCELLULAR LOCALISATION TRANSPORT FACILITAT     |                                           |
| CA0283 | 1.0 | 1.0 | 0.9 | 1.0 | 0.9 | 1.0 | IPF18034     | 2087607..2 Unknown function                        |             | 18034 | IPF18034   | UNCLASSIFIED PROTEINS                                                                |                                           |
| CA0284 | 1.0 | 1.0 | 1.1 | 1.1 | 1.2 | 1.0 | IPF14657     | 2093067..2 unknown function                        | orf19.1441  | 14657 | IPF14657   | No significant S.c. match                                                            |                                           |
| CA0285 | 0.9 | 1.0 | 1.0 | 1.0 | 1.0 | 1.0 | IPF14392     | 2100169..2 unknown function                        | orf19.1535  | 14392 | IPF14392   | No significant S.c. match                                                            |                                           |
| CA0286 | 1.0 | 1.2 | 2.1 | 2.2 | 1.3 | 1.3 | IPF14618     | complemer unknown function                         | orf19.6079  | 14618 | IPF14618   | No significant S.c. match                                                            |                                           |
| CA0287 | 1.0 | 1.1 | 1.0 | 1.1 | 1.0 | 1.0 | IPF14615     | 2105364..2 unknown function                        | orf19.6080  | 14615 | IPF14615   | CELL CYCLE AND DNA PROCESSING                                                        |                                           |
| CA0288 | 1.0 | 1.0 | 1.1 | 1.1 | 1.0 | 1.0 | IPF14614     | 2107184..2 unknown function                        |             | 14614 | IPF14614   | No significant S.c. match                                                            |                                           |
| CA0289 | 1.0 | 1.0 | 1.0 | 0.9 | 1.0 | 1.0 | IPF13333     | complemer unknown function                         | orf19.1590  | 13333 | IPF13333   | No significant S.c. match                                                            |                                           |
| CA0290 | 1.0 | 1.0 | 1.0 | 1.0 | 1.0 | 1.2 | POT14        | complemer acetyl-CoA acetyltransferase (by ho      | orf19.1591  | 13331 | CaPOT14    | Lipid fatty-acid and isoprenoid metabolism ""SUBCELLULAR LOCALISA                    | transferase activity                      |
| CA0291 | 1.0 | 0.9 | 1.0 | 0.9 | 0.9 | 1.0 | IPF13328     | 2112387..2 unknown function                        | orf19.1592  | 13328 | IPF13328   | UNCLASSIFIED PROTEINS                                                                | molecular_function unknown                |
| CA0292 | 1.0 | 1.0 | 1.0 | 0.9 | 1.0 | 1.0 | IPF19855     | complemer unknonw function                         | orf19.1384  | 19855 | IPF19855   | No significant S.c. match                                                            |                                           |
| CA0293 | 1.0 | 1.0 | 1.0 | 1.0 | 1.0 | 0.9 | IPF6624      | complemer unknown function                         | orf19.6489  | 6624  | IPF6624    | UNCLASSIFIED PROTEINS                                                                | molecular_function unknown                |

|        |     |     |     |     |     |     |             |                                                         |             |            |       |            |                                                                                     |                                  |  |
|--------|-----|-----|-----|-----|-----|-----|-------------|---------------------------------------------------------|-------------|------------|-------|------------|-------------------------------------------------------------------------------------|----------------------------------|--|
| CA0294 | 1.0 | 1.0 | 1.0 | 1.0 | 1.0 | 1.0 | IPF16061    | 2125621..2 unknown function                             | hypothetic  | orf19.9322 | 16061 | IPF16061   | UNCLASSIFIED PROTEINS                                                               | isomerase activity               |  |
| CA0295 | 1.0 | 1.0 | 1.0 | 1.0 | 1.0 | 1.0 | IPF15033    | complemer unknown function                              |             | orf19.1595 | 15033 | IPF15033   | UNCLASSIFIED PROTEINS                                                               | molecular_function unknown       |  |
| CA0296 | 0.9 | 0.9 | 1.0 | 1.1 | 1.1 | 1.0 | IFA11       | complemer Unknown function                              |             | orf19.1596 | 15031 | CaIFA11    | Nucleotide metabolism CELL CYCLE AND DNA PROCESSING CELLULAR COMMUNICATION/SIGNAL T |                                  |  |
| CA0297 | 0.9 | 0.9 | 1.0 | 0.9 | 1.1 | 1.0 | CDC53       | 2137417..2 Cell division control protein (by hom        | orf19.1674  |            | 14223 | CaCDC53    | Amino acid metabolism C-compound and carbohydrate metabolism CEL                    | structural molecule activity     |  |
| CA0298 | 1.0 | 0.9 | 1.0 | 1.0 | 1.0 | 1.0 | PPT1        | complemer Protein ser/thr phosphatase                   | orf19.1673  |            | 14222 | CaPPT1     | CLASSIFICATION NOT YET CLEAR-CUT                                                    | protein phosphatase activity     |  |
| CA0299 | 1.0 | 1.0 | 1.0 | 1.0 | 1.0 | 1.0 | IPF3765     | 2142629..2 unknown function                             | orf19.1597  |            | 3765  | IPF3765    | UNCLASSIFIED PROTEINS                                                               | molecular_function unknown       |  |
| CA0300 | 0.9 | 0.9 | 1.0 | 1.0 | 1.0 | 1.0 | ERG24       | complemer C-14 sterol reductase (by homolog             | orf19.1598  |            | 3764  | CaERG24    | Lipid fatty-acid and isoprenoid metabolism                                          | oxidoreductase activity          |  |
| CA0301 | 1.0 | 1.0 | 1.0 | 1.0 | 1.0 | 1.0 | IPF19688    | complemer unknown function                              | orf19.1606  |            | 19688 | IPF19688   | No significant S.c. match                                                           |                                  |  |
| CA0302 | 1.0 | 1.0 | 1.0 | 1.0 | 0.9 | 1.0 | MEP3        | 2164073..2 low affinity high capacity ammoniu           | orf19.9181  |            | 12620 | CaMEP3     | TRANSPORT FACILITATION                                                              | transporter activity             |  |
| CA0303 | 0.9 | 0.9 | 1.0 | 1.0 | 0.9 | 1.1 | IPF17507    | complemer putative glutathione S-transferase            | orf19.8339  |            | 17507 | IPF17507   | Nitrogen and sulphur metabolism                                                     |                                  |  |
| CA0304 | 1.1 | 1.1 | 1.0 | 1.0 | 1.0 | 1.0 | IPF12829    | complemer unknown function                              | orf19.8340  |            | 12829 | IPF12829   | UNCLASSIFIED PROTEINS                                                               | molecular_function unknown       |  |
| CA0305 | 1.0 | 0.9 | 1.0 | 0.9 | 1.0 | 1.1 | INO80       | 2176470..2 DNA helicase (by homology)                   | orf19.1734  |            | 13578 | CaINO80    | TRANSCRIPTION                                                                       | hydrolase activity               |  |
| CA0306 | 1.0 | 1.1 | 1.0 | 1.0 | 1.0 | 1.0 | HEM3        | 2181626..2 porphobilinogen deaminase                    | orf19.1742  |            | 15629 | CaHEM3     | Metabolism of vitamins cofactors and prosthetic groups ""SUBCELLULAF                | transferase activity             |  |
| CA0307 | 1.1 | 1.0 | 1.0 | 1.0 | 0.9 | 0.9 | IPF4719     | complemer similar to Saccharomyces cerevisi             | orf19.3736  |            | 4719  | IPF4719    | CELL CYCLE AND DNA PROCESSING TRANSCRIPTION CELL FATE                               | transcription regulator activity |  |
| CA0308 | 0.9 | 0.9 | 1.0 | 1.0 | 0.9 | 0.9 | RHK1        | complemer Mannosyltransferase (by homolog               | orf19.8693  |            | 17442 | CaRHK1     | C-compound and carbohydrate metabolism ""PROTEIN FATE [folding m                    | transferase activity             |  |
| CA0309 | 0.9 | 0.9 | 0.9 | 0.9 | 0.9 | 1.0 | IPF16935    | complemer unknown function                              | orf19.1091  |            | 16935 | IPF16935   | PROTEIN FATE [folding modification destination]                                     | molecular_function unknown       |  |
| CA0310 | 1.0 | 1.0 | 1.0 | 1.0 | 1.0 | 1.0 | PEX11       | complemer peroxisomal membrane protein - por            | orf19.8690  |            | 19049 | CaPEX11    | SUBCELLULAR LOCALISATION                                                            | molecular_function unknown       |  |
| CA0311 | 1.0 | 1.1 | 1.1 | 1.2 | 1.1 | 1.2 | DAK2.3EOC   | 2199549..2 dihydroxyacetone kinase, 3-prime end (by hor |             |            | 19048 | CaDAK2.3   | C-compound and carbohydrate metabolism ""CELL RESCUE DEFENSE AND VIRULENCE ""       |                                  |  |
| CA0312 | 0.9 | 1.0 | 1.0 | 1.0 | 1.1 | 1.0 | IPF6396     | complemer unknown function                              | orf19.8211  |            | 6396  | IPF6396    | UNCLASSIFIED PROTEINS                                                               | molecular_function unknown       |  |
| CA0315 | 0.9 | 0.9 | 1.0 | 0.9 | 1.2 | 1.0 | ALS9.5EOC   | complemer agglutinin-like protein, 5-prime encor        | orf19.5742  |            | 19856 | CaALS9.5   | SUBCELLULAR LOCALISATION Other virulence attributes                                 |                                  |  |
| CA0316 | 1.0 | 1.0 | 1.0 | 1.0 | 1.0 | 1.1 | ALS1.3EOC   | complemer agglutinin-like protein, 3-prime encor        | orf19.5741  |            | 13002 | CaALS1.3   | SUBCELLULAR LOCALISATION Other virulence attributes                                 |                                  |  |
| CA0317 | 1.0 | 1.1 | 1.0 | 1.0 | 1.1 | 1.0 | SSD1        | 2223396..2 Protein phosphatase (by homology             | orf19.3959  |            | 5791  | CaSSD1     | CELL CYCLE AND DNA PROCESSING ""CELL RESCUE DEFENSE AND RNA binding                 |                                  |  |
| CA0318 | 1.1 | 1.0 | 1.0 | 0.9 | 1.0 | 0.9 | FOL2        | 2227680..2 GTP cyclohydrolase (by homology              | orf19.3957  |            | 5793  | CaFOL2     | Metabolism of vitamins cofactors and prosthetic groups                              | hydrolase activity               |  |
| CA0319 | 0.8 | 0.9 | 1.1 | 1.0 | 1.0 | 1.0 | IPF15244.3F | complemer unknown function, 3-prime end                 |             |            | 19858 | IPF15244.3 | No significant S.c. match                                                           |                                  |  |
| CA0321 | 0.9 | 1.0 | 1.1 | 1.0 | 0.9 | 1.0 | APL2        | 2234514..2 AP-1 complex subunit, beta1-adap             | orf19.7861  |            | 15242 | CaAPL2     | PROTEIN FATE [folding modification destination] ""CELLULAR TRANSP                   | protein binding                  |  |
| CA0322 | 1.1 | 1.0 | 1.0 | 1.0 | 1.0 | 1.0 | RPS9B       | 2242781..2 Ribosomal protein                            | orf19.8459  |            | 3402  | CaRPS9B    | PROTEIN SYNTHESIS SUBCELLULAR LOCALISATION                                          | structural molecule activity     |  |
| CA0323 | 1.0 | 0.9 | 1.0 | 1.2 | 1.1 | 1.1 | CDC95       | 2245800..2 translation initiation factor 6 (eIF6)       | orf19.9378  |            | 12555 | CaCDC95    | PROTEIN SYNTHESIS SUBCELLULAR LOCALISATION                                          | molecular_function unknown       |  |
| CA0324 | 1.0 | 1.0 | 1.1 | 1.0 | 1.0 | 1.0 | STT4        | 2247127..2 Phosphatidylinositol-4-kinase (by f          | orf19.9377  |            | 14337 | CaSTT4     | Lipid fatty-acid and isoprenoid metabolism ""CELL CYCLE AND DNA PR                  | transferase activity             |  |
| CA0325 | 0.9 | 0.9 | 1.0 | 0.8 | 0.9 | 1.0 | IPF15222    | complemer Unknown function                              | orf19.3781  |            | 15222 | IPF15222   | UNCLASSIFIED PROTEINS                                                               |                                  |  |
| CA0326 | 0.9 | 1.0 | 0.9 | 1.1 | 1.0 | 1.0 | IPF15220    | 2255216..2 Unknown function                             | orf19.3780  |            | 15220 | IPF15220   | No significant S.c. match                                                           |                                  |  |
| CA0327 | 1.0 | 1.0 | 1.0 | 1.1 | 1.0 | 0.9 | IPF15217.5F | 2256723..2 WD-repeat protein, 5-prime end (b            | orf19.3779  |            | 15219 | IPF15217.5 | SUBCELLULAR LOCALISATION                                                            |                                  |  |
| CA0328 | 1.1 | 1.0 | 1.1 | 0.9 | 1.0 | 1.0 | IPF15217.3F | 2257498..2 WD-repeat protein, 3-prime end (b            | orf19.3778  |            | 15217 | IPF15217.3 | SUBCELLULAR LOCALISATION                                                            | molecular_function unknown       |  |
| CA0329 | 0.9 | 1.0 | 1.0 | 1.1 | 0.9 | 1.0 | IMG2        | 2258435..2 Required for Integrity of Mitochon           | orf19.3777  |            | 15216 | CaIMG2     | CONTROL OF CELLULAR ORGANIZATION                                                    | structural molecule activity     |  |
| CA0330 | 0.9 | 1.0 | 1.0 | 1.1 | 1.0 | 1.2 | BAT21       | complemer branched-chain amino acid transa              | orf19.797   |            | 5075  | CaBAT21    | Amino acid metabolism SUBCELLULAR LOCALISATION                                      | transferase activity             |  |
| CA0331 | 1.0 | 1.0 | 1.0 | 1.0 | 1.0 | 0.8 | ANC1        | 2264913..2 TFIIF subunit, transcription initia          | orf19.798   |            | 5074  | CaANC1     | Phosphate metabolism C-compound and carbohydrate metabolism CELL                    | transcription regulator activity |  |
| CA0332 | 1.1 | 1.0 | 1.0 | 1.0 | 1.1 | 1.0 | FEN2        | 2271840..2 allantate permease transporter (t            | orf19.1298  |            | 14381 | CaFEN2     | Amino acid metabolism Nitrogen and sulphur metabolism C-compound                    | transporter activity             |  |
| CA0334 | 1.0 | 1.0 | 1.0 | 1.0 | 1.0 | 1.0 | IPF19562    | complemer unknown function                              | orf19.7824  |            | 19562 | IPF19562   | No significant S.c. match                                                           |                                  |  |
| CA0335 | 1.0 | 0.9 | 0.9 | 1.0 | 1.0 | 1.0 | IFA2        | 2277979..2 unknown function                             | orf19.7825  |            | 16389 | CaIFA2     | Nucleotide metabolism CELL CYCLE AND DNA PROCESSING CELLULAR COMMUNICATION/SIGNAL T |                                  |  |
| CA0336 | 0.9 | 1.1 | 1.0 | 1.0 | 1.1 | 1.0 | IPF9869     | 2284147..2 unknown function                             | orf19.1371  |            | 9869  | IPF9869    | TRANSCRIPTION SUBCELLULAR LOCALISATION                                              |                                  |  |
| CA0337 | 1.1 | 1.0 | 1.0 | 1.1 | 1.0 | 1.0 | IPF9867     | complemer unknown function                              | orf19.1370  |            | 9867  | IPF9867    | No significant S.c. match                                                           |                                  |  |
| CA0338 | 1.0 | 1.0 | 0.9 | 1.0 | 1.0 | 0.9 | IPF13252    | 2291654..2 unknown function                             | orf19.3378  |            | 13252 | IPF13252   | No significant S.c. match                                                           |                                  |  |
| CA0339 | 1.0 | 0.9 | 1.0 | 1.0 | 1.0 | 1.0 | IPF13247    | 2293360..2 unknown function                             | orf19.3376  |            | 13247 | IPF13247   | No significant S.c. match                                                           |                                  |  |
| CA0340 | 0.9 | 0.9 | 1.0 | 0.9 | 1.0 | 0.9 | IPF19859    | 2295931..2 unknown function                             | orf19.3375  |            | 19859 | IPF19859   | No significant S.c. match                                                           |                                  |  |
| CA0341 | 1.1 | 1.0 | 1.1 | 1.0 | 1.1 | 1.0 | XKS1        | 2298575..2 xylulokinase (by homology)                   | orf19.1788  |            | 10472 | CaXKS1     | C-compound and carbohydrate metabolism                                              | transferase activity             |  |
| CA0342 | 0.9 | 1.0 | 1.0 | 1.0 | 1.0 | 1.0 | IPF10470    | 2300711..2 unknown function                             | orf19.1789  |            | 10470 | IPF10470   | UNCLASSIFIED PROTEINS                                                               | molecular_function unknown       |  |
| CA0343 | 1.0 | 0.9 | 1.0 | 1.0 | 1.1 | 1.0 | LYS1.5EOC   | 2302869..2 saccharopine dehydrogenase, 5-prime end (b   |             |            | 10469 | CaLYS1.5   | Amino acid metabolism SUBCELLULAR LOCALISATION                                      | oxidoreductase activity          |  |
| CA0344 | 1.0 | 0.9 | 1.1 | 1.0 | 1.0 | 1.0 | IFF1.3EOC   | complemer Unknown function, 3-prime end                 | orf19.1346  |            | 16164 | CaIFF1.3   | No significant S.c. match                                                           |                                  |  |
| CA0345 | 1.1 | 0.9 | 0.8 | 0.7 | 0.7 | 0.9 | ACH1        | complemer acetyl-coenzyme-A hydrolase (by               | orf19.1068  |            | 12009 | CaACH1     | Lipid fatty-acid and isoprenoid metabolism ""CELL FATE SUBCELLULAF                  | hydrolase activity               |  |
| CA0346 | 1.0 | 1.0 | 1.1 | 1.2 | 1.2 | 1.1 | ROX1        | 2327367..2 Possible heme-dependenc                      | orf19.1034  |            | 19029 | CaROX1     | Metabolism of vitamins cofactors and prosthetic groups ""TRANSCRIPTI                | DNA binding                      |  |
| CA0347 |     |     |     |     |     |     | FOX2        | 2337294..2340014                                        |             |            |       |            |                                                                                     |                                  |  |
| CA0348 | 1.0 | 1.1 | 1.0 | 1.0 | 1.0 | 1.0 | IFK1        | complemer probable monooxygenase (by homc               | orf19.9098  |            | 15750 | CaIFK1     | No significant S.c. match                                                           |                                  |  |
| CA0349 | 1.0 | 1.1 | 1.0 | 1.0 | 1.0 | 1.0 | IPF19026    | complemer unknown function                              | orf19.1813  |            | 19026 | IPF19026   | UNCLASSIFIED PROTEINS                                                               | molecular_function unknown       |  |
| CA0350 | 1.1 | 1.0 | 1.0 | 1.0 | 1.0 | 0.9 | SNU114      | complemer snRNP-specific protein (by homol              | orf19.7784  |            | 16740 | CaSNU114   | PROTEIN SYNTHESIS                                                                   | RNA binding,helicase activity    |  |
| CA0351 | 0.9 | 0.9 | 0.9 | 1.0 | 1.0 | 1.0 | RPB4.3F     | complemer DNA-directed RNA polymerase II,               | orf19.145   |            | 19621 | CaRPB4.3   | TRANSCRIPTION ""CELL RESCUE DEFENSE AND VIRULENCE ""SUB                             | nucleotidyltransferase activity  |  |
| CA0352 | 1.1 | 1.2 | 1.0 | 1.0 | 1.0 | 1.0 | RPB4.5F     | complemer DNA-directed RNA polymerase II,               | orf19.146   |            | 19620 | CaRPB4.5   | TRANSCRIPTION ""CELL RESCUE DEFENSE AND VIRULENCE ""SUBCELLULAR LOCALISATION        |                                  |  |
| CA0353 | 1.2 | 1.1 | 0.9 | 1.0 | 1.0 | 1.0 | YAK1.3F     | complemer serine/threonine protein kinase, 3-           | orf19.147   |            | 16043 | CaYAK1.3   | CELL CYCLE AND DNA PROCESSING SUBCELLULAR LOCALISATIO                               | protein kinase activity          |  |
| CA0354 | 0.9 | 1.0 | 1.2 | 1.1 | 1.0 | 1.0 | YAK1.5F     | complemer serine/threonine protein kinase, 5-           | orf19.7788  |            | 16042 | CaYAK1.5   | No significant S.c. match                                                           |                                  |  |
| CA0355 | 1.2 | 1.1 | 1.0 | 1.1 | 1.2 | 1.1 | IPF2535     | complemer unknown function                              | orf19.1395  |            | 2535  | IPF2535    | No significant S.c. match                                                           |                                  |  |
| CA0356 | 0.9 | 0.9 | 1.0 | 1.1 | 1.0 | 1.0 | IPF2532     | 2378711..2 unknown function                             | orf19.1395; |            | 2532  | IPF2532    | UNCLASSIFIED PROTEINS                                                               | molecular_function unknown       |  |
| CA0357 | 0.9 | 1.0 | 1.0 | 1.0 | 0.9 | 1.1 | FCY22       | complemer purine-cytosine permease (by hor              | orf19.333   |            | 12764 | CaFCY22    | Nucleotide metabolism CELLULAR TRANSPORT AND TRANSPORT M                            | transporter activity             |  |
| CA0358 | 0.9 | 0.8 | 1.0 | 1.1 | 1.0 | 0.9 | IPF17488.5F | 2397615..2 unknown function, 5-prime end                | orf19.1818  |            | 17488 | IPF17488.5 | No significant S.c. match                                                           |                                  |  |
| CA0359 | 1.0 | 1.0 | 1.0 | 1.0 | 1.0 | 0.9 | IPF17488.3F | 2398456..2 unknown function, 3-prime end                | orf19.1820  |            | 17489 | IPF17488.3 | No significant S.c. match                                                           |                                  |  |
| CA0360 | 1.0 | 1.0 | 1.0 | 1.0 | 0.9 | 1.0 | IPF2328     | complemer unknown function                              | orf19.8720  |            | 2328  | IPF2328    | No significant S.c. match                                                           |                                  |  |
| CA0361 | 1.0 | 1.0 | 0.9 | 1.0 | 1.0 | 0.9 | IPF2326     | 2404599..2 unknown function                             | orf19.1124  |            | 2326  | IPF2326    | No significant S.c. match                                                           |                                  |  |
| CA0362 | 0.8 | 2.5 | 0.7 | 0.6 | 0.4 | 1.2 | TEF1        | complemer translation elongation factor eEF1            | orf19.9009  |            | 9732  | CaTEF1     | PROTEIN SYNTHESIS SUBCELLULAR LOCALISATION                                          | translation regulator activity   |  |
| CA0363 | 1.0 | 1.0 | 1.0 | 0.9 | 1.0 | 1.0 | SPR3        | 2414124..2 sporulation-specific septin (by hor          | orf19.1524  |            | 16732 | CaSPR3     | CELL FATE SUBCELLULAR LOCALISATION                                                  |                                  |  |
| CA0364 | 1.0 | 1.0 | 1.0 | 1.0 | 1.0 | 1.0 | IPF15983    | 2416756..2 unknown function                             | orf19.1525  |            | 15983 | IPF15983   | Nucleotide metabolism                                                               | molecular_function unknown       |  |
| CA0365 | 1.0 | 1.0 | 1.0 | 1.0 | 1.0 | 1.0 | IPF15177    | complemer Unknown function                              | orf19.750   |            | 15177 | IPF15177   | No significant S.c. match                                                           |                                  |  |
| CA0366 | 1.1 | 1.1 | 1.0 | 1.0 | 1.0 | 1.0 | IPF19017    | 2443661..2 unknown function                             | orf19.8931  |            | 19017 | IPF19017   | No significant S.c. match                                                           |                                  |  |
| CA0367 | 1.0 | 0.9 | 0.9 | 1.0 | 1.0 | 1.0 | TIM22       | complemer Mitochondrial import inner membr              | orf19.1352  |            | 16416 | CaTIM22    | PROTEIN FATE [folding modification destination] ""CELLULAR TRANSP                   | transporter activity             |  |
| CA0368 | 1.2 | 1.1 | 1.0 | 1.0 | 1.0 | 1.1 | IPF11646    | 2446413..2 unknown function                             | orf19.1353  |            | 11646 | IPF11646   | No significant S.c. match                                                           |                                  |  |
| CA0369 | 1.0 | 1.0 | 1.0 | 0.9 | 0.9 | 1.0 | IPF13675    | complemer unknown function                              | orf19.1656  |            | 13675 | IPF13675   | UNCLASSIFIED PROTEINS                                                               |                                  |  |

|        |     |     |     |     |     |     |              |                                                      |             |       |            |                                                                                              |                                                 |
|--------|-----|-----|-----|-----|-----|-----|--------------|------------------------------------------------------|-------------|-------|------------|----------------------------------------------------------------------------------------------|-------------------------------------------------|
| CA0370 | 1.0 | 1.0 | 1.0 | 0.9 | 0.9 | 1.1 | IPF13678     | complemer unknown function                           |             | 13678 | IPF13678   | CLASSIFICATION NOT YET CLEAR-CUT                                                             | molecular_function unknown                      |
| CA0371 | 1.0 | 1.0 | 0.9 | 1.1 | 1.0 | 1.1 | IPF19578     | complemer unknown function                           | orf19.1087  | 19578 | IPF19578   | No significant S.c. match                                                                    |                                                 |
| CA0372 | 1.1 | 1.0 | 1.0 | 1.0 | 1.1 | 1.1 | IPF10062     | complemer unknown function                           | orf19.1086  | 10062 | IPF10062   | UNCLASSIFIED PROTEINS                                                                        | molecular_function unknown                      |
| CA0373 | 0.9 | 0.9 | 0.9 | 0.9 | 0.9 | 1.0 | IPF7655.5EOC | complemer unknown function, 5-prime end              |             | 7655  | IPF7655.5€ | No significant S.c. match                                                                    |                                                 |
| CA0374 | 1.0 | 0.9 | 1.0 | 1.1 | 1.0 | 0.9 | IFK3         | complemer Probable monooxygenase (by hon             | orf19.8477  | 7651  | CaIFK3     | No significant S.c. match                                                                    |                                                 |
| CA0375 | 0.9 | 1.0 | 1.0 | 1.1 | 0.9 | 1.0 | CRH11        | 2480849..2 Probable membrane protein (by h           | orf19.2706  | 14360 | CaCRH11    | SUBCELLULAR LOCALISATION                                                                     | molecular_function unknown                      |
| CA0376 | 1.0 | 0.9 | 1.0 | 1.0 | 0.9 | 1.0 | QCCR9        | 2482622..2 ubiquinol--cytochrome-c reducta           | subunit 9(t | 14357 | CaQCCR9    | ENERGY SUBCELLULAR LOCALISATION                                                              | transporter activity,oxidoreductase             |
| CA0377 | 1.0 | 0.9 | 1.0 | 1.0 | 1.0 | 1.1 | IPF14356     | 2483232..2 unknown function                          | orf19.2708  | 14356 | IPF14356   | UNCLASSIFIED PROTEINS                                                                        | molecular_function unknown                      |
| CA0378 | 1.0 | 1.0 | 1.0 | 0.9 | 1.0 | 1.0 | IPF3178      | complemer Unknown function                           | orf19.3170  | 3178  | IPF3178    | UNCLASSIFIED PROTEINS                                                                        | molecular_function unknown                      |
| CA0379 | 1.0 | 0.9 | 1.0 | 1.0 | 1.0 | 1.2 | SSP120       | 2494755..2 secretory protein (by homology)           | orf19.3173  | 12012 | CaSSP120   | CELLULAR TRANSPORT AND TRANSPORT MECHANISMS SUBCELL                                          | molecular_function unknown                      |
| CA0380 | 1.2 | 1.2 | 1.1 | 1.1 | 1.0 | 1.0 | IPF14109     | 2512372..2 unknown function                          | orf19.2451  | 14109 | IPF14109   | No significant S.c. match                                                                    |                                                 |
| CA0381 | 1.0 | 1.0 | 1.2 | 1.0 | 1.0 | 1.0 | IPF16047     | complemer unknown function                           | orf19.2825  | 16047 | IPF16047   | UNCLASSIFIED PROTEINS                                                                        | molecular_function unknown                      |
| CA0382 | 1.0 | 1.1 | 1.0 | 1.0 | 1.0 | 1.0 | IPF16030     | 2528963..2 similar to Saccharomyces cerevisi         | orf19.1842  | 16030 | IPF16030   | CELL FATE SUBCELLULAR LOCALISATION                                                           | signal transducer activity                      |
| CA0383 | 1.1 | 1.1 | 1.0 | 1.0 | 1.0 | 1.0 | IPF16028     | 2533990..2 unknown function                          | orf19.1841  | 16028 | IPF16028   | Lipid fatty-acid and isoprenoid metabolism ""                                                | CELL CYCLE AND DNA PROCESSING PROTEIN SYNTHESI  |
| CA0384 | 1.0 | 0.9 | 1.0 | 1.1 | 1.0 | 1.0 | PCL1         | 2549651..2 cyclin, G1/S-specific (by homology        | orf19.1017; | 16634 | CaPCL1     | CELL CYCLE AND DNA PROCESSING                                                                | protein kinase activity,enzyme regi             |
| CA0385 | 1.0 | 0.9 | 1.0 | 1.1 | 1.1 | 1.0 | IPF4071      | complemer unknown function                           | orf19.1861  | 4071  | IPF4071    | CELL CYCLE AND DNA PROCESSING SUBCELLULAR LOCALISATION                                       |                                                 |
| CA0386 | 1.0 | 1.0 | 0.9 | 1.0 | 1.1 | 0.7 | IPF4065      | 2557981..2 unknown function                          | orf19.1862  | 4065  | IPF4065    | UNCLASSIFIED PROTEINS                                                                        | molecular_function unknown                      |
| CA0387 | 0.9 | 0.9 | 1.0 | 0.9 | 0.9 | 1.0 | IPF10318.5EC | complemer unknown function, 5-prime end              |             | 14475 | IPF10318.€ | No significant S.c. match                                                                    |                                                 |
| CA0388 | 1.1 | 1.1 | 1.0 | 1.1 | 1.2 | 1.1 | IPF14468     | 2564217..2 unknown function                          | orf19.1907  | 14468 | IPF14468   | UNCLASSIFIED PROTEINS                                                                        | molecular_function unknown                      |
| CA0389 | 1.0 | 1.0 | 1.0 | 1.0 | 0.9 | 1.0 | IPF14465     | complemer unknown function                           | orf19.1910  | 14465 | IPF14465   | No significant S.c. match                                                                    |                                                 |
| CA0390 | 1.0 | 1.0 | 1.0 | 1.0 | 1.0 | 1.0 | DCG1         | complemer involved in nitrogen-catabolite            | orf19.244   | 10499 | CaDCG1     | Nitrogen and sulphur metabolism CONTROL OF CELLULAR ORGANIZ                                  | molecular_function unknown                      |
| CA0391 | 0.9 | 0.9 | 1.0 | 0.9 | 0.9 | 0.9 | DDC1         | 2572793..2 DNA damage checkpoint protein, c          | orf19.7875  | 10496 | CaDDC1     | CELL CYCLE AND DNA PROCESSING ""CELL RESCUE DEFENSE AN                                       | molecular_function unknown                      |
| CA0393 | 1.1 | 1.0 | 1.0 | 1.0 | 0.9 | 0.9 | IPF12758.3F  | complemer unknown function, 3-prime end              |             | 12759 | IPF12758.€ | No significant S.c. match                                                                    |                                                 |
| CA0394 | 1.1 | 1.1 | 1.0 | 1.0 | 1.0 | 1.0 | IPF12758.5F  | complemer unknown function, 5-prime end              | orf19.7966  | 12758 | IPF12758.€ | No significant S.c. match                                                                    |                                                 |
| CA0395 | 1.0 | 1.0 | 1.0 | 0.9 | 1.0 | 1.0 | SEF11.5EOC   | complemer Putative transcription factor, 5-prin      | orf19.1926  | 15112 | CaSEF11.€  | TRANSCRIPTION CELL FATE SUBCELLULAR LOCALISATION                                             |                                                 |
| CA0396 | 1.1 | 1.0 | 1.0 | 1.0 | 0.9 | 1.0 | SNM1         | 2596774..2 RNA binding protein of RNase MR           | orf19.1927  | 15109 | CaSNM1     | No significant S.c. match                                                                    |                                                 |
| CA0397 | 1.0 | 1.0 | 1.0 | 1.1 | 1.1 | 1.1 | FRE31        | complemer Ferric reductase (by homology)             | orf19.1930  | 15107 | CaFRE31    | REGULATION OF/INTERACTION WITH CELLULAR ENVIRONMENT O                                        | oxidoreductase activity                         |
| CA0398 | 0.9 | 1.0 | 1.0 | 1.1 | 1.1 | 0.9 | ARO2         | 2602824..2 chorismate synthase (by homology)         | orf19.1986  | 14673 | CaARO2     | Amino acid metabolism SUBCELLULAR LOCALISATION                                               | lyase activity                                  |
| CA0399 | 1.1 | 0.9 | 0.9 | 0.9 | 1.0 | 1.0 | CDC45        | complemer Chromosomal DNA replication initi          | orf19.1988  | 14671 | CaCDC45    | CELL CYCLE AND DNA PROCESSING SUBCELLULAR LOCALISATION                                       | DNA binding                                     |
| CA0400 | 1.0 | 1.1 | 1.0 | 1.0 | 1.0 | 1.0 | IPF7423.3EOC | 2608466..2 similar to Saccharomyces cerevisi         | orf19.6223  | 11910 | IPF7423.3€ | CELL FATE                                                                                    |                                                 |
| CA0401 | 1.0 | 1.0 | 1.1 | 1.1 | 1.1 | 1.0 | RTA1         | complemer unknown function                           | orf19.6224  | 11914 | CaRTA1     | UNCLASSIFIED PROTEINS                                                                        |                                                 |
| CA0402 | 0.9 | 0.9 | 0.9 | 1.0 | 1.1 | 1.0 | IPF15225     | complemer Sorting nexin-like protein (by hom         | orf19.1990  | 15225 | IPF15225   | PROTEIN FATE [folding modification destination]                                              |                                                 |
| CA0403 | 0.9 | 1.0 | 1.0 | 0.9 | 0.9 | 1.0 | IPF15224     | complemer unknown function                           | orf19.1989  | 15224 | IPF15224   | UNCLASSIFIED PROTEINS                                                                        | molecular_function unknown                      |
| CA0404 | 0.9 | 1.0 | 1.0 | 1.1 | 0.9 | 1.0 | LYS14        | 2624704..2 transcription factor involved in lys      | orf19.5548  | 14435 | CaLYS14    | Amino acid metabolism TRANSCRIPTION SUBCELLULAR LOCALISAT                                    | transcription regulator activity                |
| CA0405 | 1.0 | 1.0 | 1.1 | 1.1 | 1.0 | 1.0 | IPF19862.3F  | complemer unknown function, 3-prime end              | orf19.1299; | 19861 | IPF19862.€ | No significant S.c. match                                                                    |                                                 |
| CA0407 |     |     |     |     |     |     | SAC6.3F      | complement(2627330..2627737)                         |             | 8093  | CaSAC6.5I  | CELLULAR TRANSPORT AND TRANSPORT MECHANISMS CELL FAT                                         | protein binding                                 |
| CA0408 | 1.1 | 1.0 | 1.0 | 1.1 | 0.9 | 1.2 | SAC6.5F      | complemer actin filament bundling protein, fim       | orf19.5544  | 15067 | CaPHO80    | Phosphate metabolism TRANSCRIPTION SUBCELLULAR LOCALISAT                                     | protein kinase activity,enzyme regi             |
| CA0409 | 1.0 | 1.1 | 0.9 | 1.0 | 1.0 | 0.9 | PHO80        | 2633763..2 Cyclin (by homology)                      | orf19.5755  | 15065 | IPF15065   | UNCLASSIFIED PROTEINS                                                                        | molecular_function unknown                      |
| CA0410 | 1.0 | 0.9 | 1.0 | 1.0 | 1.1 | 1.1 | IPF15065     | complemer unknown function                           | orf19.1318I | 17676 | IPF17676   | SUBCELLULAR LOCALISATION                                                                     | protein binding                                 |
| CA0411 | 0.9 | 0.9 | 0.9 | 1.0 | 1.0 | 1.1 | IPF17676     | 2640129..2 similar to Saccharomyces cerevisi         | orf19.1507  | 18994 | CaALS2     | Other virulence attributes                                                                   |                                                 |
| CA0413 | 1.1 | 1.2 | 1.0 | 1.0 | 1.0 | 1.0 | ALS2         | 2649386..2 agglutinin-like protein, 3-prime en       | orf19.2122  | 4068  | IPF4068    | No significant S.c. match                                                                    |                                                 |
| CA0414 | 0.9 | 0.9 | 0.9 | 1.1 | 1.1 | 1.0 | IPF4068      | complemer reverse transcriptase                      | orf19.2164  | 16160 | CaFRP3     | C-compound and carbohydrate metabolism                                                       | transporter activity                            |
| CA0415 | 1.4 | 1.7 | 1.0 | 1.1 | 1.1 | 1.0 | FRP3         | 2666833..2 member of the FRP family of prote         | orf19.1224  | 17492 | IPF17492   | No significant S.c. match                                                                    |                                                 |
| CA0416 | 1.0 | 0.9 | 1.0 | 1.0 | 1.0 | 1.1 | IPF17492     | complemer unknown function                           | orf19.1225  | 6529  | CaUBC13    | PROTEIN FATE [folding modification destination]                                              |                                                 |
| CA0417 | 1.0 | 1.1 | 1.0 | 0.9 | 1.0 | 0.9 | UBC13        | 2678425..2 E2 ubiquitin-conjugating enzyme (         | orf19.2225  | 9051  | IPF9051.5€ | CELL CYCLE AND DNA PROCESSING ""PROTEIN FATE [folding modification destination]              | ""CONTROL O                                     |
| CA0418 | 1.0 | 1.0 | 1.0 | 1.1 | 1.0 | 1.0 | IPF9051.5EOC | complemer unknown function, 5-prime end              | orf19.2227  | 19864 | IPF19864   | CELL FATE SUBCELLULAR LOCALISATION                                                           | protein binding                                 |
| CA0419 | 1.0 | 1.0 | 1.0 | 0.9 | 1.0 | 0.9 | IPF19864     | 2683154..2 unknown function                          | orf19.2228  | 9048  | IPF9048    | UNCLASSIFIED PROTEINS                                                                        | molecular_function unknown                      |
| CA0420 | 1.1 | 1.0 | 1.0 | 1.0 | 1.0 | 0.9 | IPF9048      | complemer unknown function                           | orf19.2229  | 9047  | IPF9047    | UNCLASSIFIED PROTEINS                                                                        | DNA binding,transcription regulato              |
| CA0421 | 1.0 | 1.0 | 1.0 | 0.9 | 1.0 | 1.0 | IPF9047      | 2686402..2 unknown function                          | orf19.2230  | 9046  | IPF9046    | No significant S.c. match                                                                    |                                                 |
| CA0422 | 1.0 | 1.1 | 1.0 | 1.0 | 0.9 | 1.2 | IPF9046      | complemer unknown function                           | orf19.2231  | 15273 | IPF15273   | Amino acid metabolism Nitrogen and sulphur metabolism ""                                     | Lipid fatty-acid and isoprenoid metabolism ""CE |
| CA0423 | 1.0 | 0.9 | 1.0 | 0.9 | 0.9 | 1.1 | IPF15273     | complemer unknown function                           | orf19.9381  | 10795 | IPF10795   | TRANSCRIPTION ""CELL RESCUE DEFENSE AND VIRULENCE ""REGULATION OF/INTERACTION WIT            |                                                 |
| CA0424 | 1.0 | 1.1 | 1.0 | 1.0 | 1.1 | 1.0 | IPF10795     | complemer putative transcription factor (by ho       | orf19.2356  | 11679 | CaPPH21    | C-compound and carbohydrate metabolism CELL CYCLE AND DNA PR                                 | protein phosphatase activity                    |
| CA0425 | 1.0 | 1.1 | 1.0 | 1.0 | 1.1 | 1.0 | PPH21        | 2710813..2 protein ser/thr phosphatase PP2A-         | orf19.9252  | 11996 | CaCFT1     | TRANSCRIPTION SUBCELLULAR LOCALISATION                                                       | RNA binding                                     |
| CA0426 | 0.9 | 1.1 | 1.1 | 1.0 | 1.0 | 1.0 | CFT1         | complemer pre-mRNA 3 -end processing fact            | orf19.2760  | 11995 | IPF11995   | Lipid fatty-acid and isoprenoid metabolism                                                   | transferase activity                            |
| CA0427 | 1.0 | 1.0 | 1.1 | 0.9 | 0.9 | 1.0 | IPF11995     | 2720571..2 unknown function                          | orf19.2761  | 14829 | CaILV2     | Amino acid metabolism SUBCELLULAR LOCALISATION                                               | transferase activity                            |
| CA0428 | 1.2 | 1.0 | 1.0 | 1.0 | 1.0 | 1.1 | ILV2         | 2723926..2 acetolactate synthase (by homolo          | orf19.1613  | 14827 | IPF14827   | No significant S.c. match                                                                    |                                                 |
| CA0429 | 1.0 | 0.9 | 1.0 | 0.9 | 1.0 | 1.1 | IPF14827     | complemer unknown function                           | orf19.1611  | 7928  | CaPRC1     | PROTEIN FATE [folding modification destination]                                              | ""SUBCELLULAR LOC                               |
| CA0430 | 1.0 | 1.1 | 1.0 | 1.2 | 1.0 | 1.1 | PRC1         | complemer Carboxypeptidase Y pr carboxypep           | orf19.1339  | 7927  | IPF7927    | C-compound and carbohydrate metabolism                                                       | molecular_function unknown                      |
| CA0431 | 1.1 | 1.1 | 1.1 | 1.1 | 1.0 | 1.0 | IPF7927      | 2734025..2 putative aldose reductase (by hom         | orf19.1340  | 7926  | IPF7926    | CLASSIFICATION NOT YET CLEAR-CUT                                                             |                                                 |
| CA0432 | 1.1 | 0.9 | 1.1 | 1.0 | 0.9 | 1.0 | IPF7926      | 2735092..2 putative protein kinase (by homolo        | orf19.1341  | 7924  | CaSHM1     | Nucleotide metabolism Purine ribonucleotide metabolism ""                                    | Lipid fatty-ac transferase activity             |
| CA0433 | 1.1 | 1.0 | 1.0 | 0.9 | 1.1 | 1.1 | SHM1         | 2736327..2 Serine hydroxymethyltlserine hydr         | orf19.1342  | 13577 | IPF13577   | No significant S.c. match                                                                    |                                                 |
| CA0434 | 1.0 | 1.0 | 1.0 | 1.0 | 1.0 | 0.9 | IPF13577     | complemer unknown function                           | orf19.9303  | 15411 | CaUGP1     | C-compound and carbohydrate metabolism ENERGY ""PROTEIN FATE nucleotidyltransferase activity |                                                 |
| CA0435 | 1.0 | 1.0 | 1.1 | 1.2 | 1.1 | 1.2 | UGP1         | 2743481..2 UTP--glucose-1-phosphate uridyly          | orf19.9305  | 15412 | CaRBL2     | CELL CYCLE AND DNA PROCESSING SUBCELLULAR LOCALISATIO                                        | chaperone activity                              |
| CA0436 | 0.9 | 0.9 | 1.0 | 0.9 | 0.9 | 0.9 | RBL2         | complemer Beta-tubulin binding protein (by homology) |             | 15414 | CaDIT1     | CELL FATE                                                                                    |                                                 |
| CA0437 | 1.0 | 1.0 | 1.0 | 0.9 | 1.0 | 1.0 | DIT1         | complemer Spore wall maturation protein (by l        | orf19.9308  | 19618 | CaSTE4.5€  | CELLULAR COMMUNICATION/SIGNAL TRANSDUCTION MECHANISM                                         | hydrolase activity                              |
| CA0438 | 1.0 | 1.0 | 1.0 | 1.0 | 1.0 | 0.9 | STE4.5EOC    | complemer GTP-binding protein beta subunit           | orf19.8419  | 12478 | IPF12478   | UNCLASSIFIED PROTEINS                                                                        | molecular_function unknown                      |
| CA0439 | 1.0 | 1.1 | 1.0 | 1.1 | 1.0 | 1.0 | IPF12478     | 2757659..2 unknown function                          | orf19.1301I | 12473 | IPF12473   | No significant S.c. match                                                                    |                                                 |
| CA0440 | 1.0 | 1.0 | 0.9 | 0.9 | 1.0 | 1.1 | IPF12473     | 2759972..2 unknown function                          | orf19.5571  | 12472 | IPF12472   | C-compound and carbohydrate metabolism ""PROTEIN FATE [folding modification destination]     | ""CONTROL                                       |
| CA0441 | 0.9 | 1.0 | 1.0 | 1.0 | 1.0 | 1.1 | IPF12472     | complemer unknown function                           | orf19.1301I | 2066  | CaIFC4     | TRANSPORT FACILITATION                                                                       |                                                 |
| CA0442 | 1.0 | 1.4 | 1.0 | 1.0 | 1.0 | 1.0 | IFC4         | 2766149..2 unknown function                          | orf19.2292  | 19691 | CaSPB1     | TRANSCRIPTION PROTEIN SYNTHESIS SUBCELLULAR LOCALISAT                                        | transferase activity                            |
| CA0443 | 1.0 | 1.0 | 1.0 | 1.0 | 1.0 | 0.9 | SPB1         | complemer Putative methyltransferase by hon          | orf19.7727  | 16249 | IPF17429.€ | CELLULAR TRANSPORT AND TRANSPORT MECHANISMS SUBCELL                                          | molecular_function unknown                      |
| CA0444 | 1.1 | 1.0 | 0.9 | 1.1 | 1.0 | 1.0 | IPF17429.3F  | complemer similar to Saccharomyces cerevisi          | orf19.75    |       |            |                                                                                              |                                                 |

|        |     |     |     |     |     |     |             |                                                 |                     |       |             |                                                           |                                                               |
|--------|-----|-----|-----|-----|-----|-----|-------------|-------------------------------------------------|---------------------|-------|-------------|-----------------------------------------------------------|---------------------------------------------------------------|
| CA0445 | 1.0 | 1.0 | 1.0 | 0.9 | 1.0 | 1.0 | IPF17429.5F | complemer similar to Saccharomyces cerevisi     | orf19.7725          | 17429 | IPF17429.5F | UNCLASSIFIED PROTEINS                                     |                                                               |
| CA0446 | 1.0 | 1.0 | 1.1 | 1.1 | 1.2 | 1.2 | IPF14282    | complemer Similar to mucin proteins (by hom     | orf19.2296          | 14282 | IPF14282    | No significant S.c. match                                 |                                                               |
| CA0447 | 1.1 | 1.0 | 0.9 | 1.1 | 1.0 | 0.9 | IPF14275    | complemer Probable ADP-ribosylation factors     | orf19.2297          | 14275 | IPF14275    | PROTEIN FATE [folding modification destination]           | ***CELLULAR TRANSP                                            |
| CA0448 | 0.6 | 0.5 | 1.1 | 1.6 | 1.1 | 1.1 | ALS10       | 2802350..2 agglutinin like protein              | orf19.2355          | 12997 | CaALS10     | CELL FATE SUBCELLULAR LOCALISATION                        | Other virulence attributes                                    |
| CA0449 | 1.0 | 1.0 | 1.0 | 1.0 | 1.0 | 1.0 | MOT2.3      | complemer transcriptional repressor, 3-prime    | orf19.2379          | 9357  | CaMOT2.3    | UNCLASSIFIED PROTEINS                                     | transcription regulator activity                              |
| CA0450 | 0.8 | 1.0 | 1.0 | 1.0 | 0.9 | 1.0 | IPF9353     | 2818634..2 unknown function                     | orf19.2378          | 9353  | IPF9353     | TRANSPORT FACILITATION                                    | molecular_function unknown                                    |
| CA0451 | 1.0 | 1.0 | 0.9 | 1.0 | 1.0 | 1.0 | IPF13556    | 2822970..2 unknown function                     | orf19.8882          | 13556 | IPF13556    | No significant S.c. match                                 |                                                               |
| CA0452 | 1.1 | 1.0 | 1.0 | 1.0 | 1.0 | 1.0 | IPF13554    | 2824363..2 Hypothetical acidic protein          | orf19.8881          | 13554 | IPF13554    | UNCLASSIFIED PROTEINS                                     |                                                               |
| CA0453 | 1.0 | 0.9 | 1.0 | 1.1 | 1.0 | 1.0 | IPF13552    | complemer putative methyltransferase (by ho     | orf19.8880          | 13552 | IPF13552    | UNCLASSIFIED PROTEINS                                     | transferase activity                                          |
| CA0454 | 1.0 | 1.0 | 1.0 | 0.9 | 1.0 | 1.0 | RPN6        | 2826397..2 subunit of the regulatory particle   | orf19.8879          | 13551 | CaRPN6      | PROTEIN FATE [folding modification destination]           | ***SUBCELLULAR LOC                                            |
| CA0455 | 0.9 | 0.4 | 1.0 | 1.1 | 1.0 | 1.0 | TCA5A       | 2830521..2 polypeptide of Tca5 ret polyprotein  | orf19.2427          | 11655 | CaTca5a     | UNCLASSIFIED PROTEINS                                     | structural molecule activity                                  |
| CA0457 | 1.2 | 1.2 | 1.1 | 1.1 | 1.1 | 1.0 | IPF15604    | 2842182..2 transcription factor (by homology)   | orf19.2432          | 15604 | IPF15604    | Lipid fatty-acid and isoprenoid metabolism                | ***TRANSCRIPTION CELLUL                                       |
| CA0458 | 1.0 | 1.0 | 0.9 | 1.0 | 1.1 | 1.0 | IPF15601    | 2843873..2 unknown function                     | orf19.2433          | 15601 | IPF15601    | No significant S.c. match                                 | transcription regulator activity                              |
| CA0459 | 1.0 | 1.0 | 0.9 | 1.0 | 1.1 | 0.9 | HOL3        | 2846242..2 member of major facilitator superf   | orf19.2517          | 4969  | CaHOL3      | CELL RESCUE DEFENSE AND VIRULENCE                         | ***TRANSPORT FACILITATION                                     |
| CA0460 | 1.0 | 1.0 | 1.0 | 1.0 | 1.0 | 0.9 | SEC17       | complemer transport vesicle fusion protein (by  | orf19.2518          | 4971  | CaSEC17     | CELLULAR TRANSPORT AND TRANSPORT MECHANISMS               | CONTRO transporter activity                                   |
| CA0461 | 1.0 | 1.0 | 1.0 | 1.0 | 1.0 | 0.9 | IPF4972     | 2849425..2 unknown function                     | orf19.2519          | 4972  | IPF4972     | CELL CYCLE AND DNA PROCESSING SUBCELLULAR LOCALISATION    | molecular_function unknown                                    |
| CA0462 | 1.1 | 1.0 | 0.9 | 0.9 | 1.0 | 1.0 | MRPS28      | complemer ribosomal protein (by homology)       | orf19.2520          | 4973  | CaMRPS28    | PROTEIN SYNTHESIS SUBCELLULAR LOCALISATION                | RNA binding                                                   |
| CA0463 | 0.9 | 1.0 | 1.0 | 1.0 | 0.9 | 0.9 | IPF18979    | complemer unknown function                      | orf19.7797          | 18979 | IPF18979    | Metabolism of vitamins cofactors and prosthetic groups    |                                                               |
| CA0464 | 1.2 | 1.1 | 1.0 | 1.0 | 1.0 | 1.0 | IPF14116    | 2853561..2 unknown function                     | orf19.7798          | 14116 | IPF14116    | UNCLASSIFIED PROTEINS                                     | hydrolase activity                                            |
| CA0465 | 1.1 | 1.0 | 1.0 | 1.0 | 1.0 | 1.1 | IPF14113    | 2856442..2 unknown function                     | orf19.7800          | 14113 | IPF14113    | TRANSCRIPTION                                             | molecular_function unknown                                    |
| CA0466 | 1.0 | 1.0 | 1.0 | 0.9 | 1.0 | 1.0 | URA4        | complemer dihydroorotase (by homology)          | orf19.1977          | 8687  | CaURA4      | Nucleotide metabolism                                     | hydrolase activity                                            |
| CA0467 | 0.9 | 1.0 | 1.1 | 1.0 | 0.9 | 1.0 | TRX2        | complemer thioredoxin (by homology)             | orf19.1976          | 8686  | CaTRX2      | CELL CYCLE AND DNA PROCESSING                             | ***PROTEIN FATE [folding modification destination]            |
| CA0468 | 1.0 | 1.0 | 1.0 | 1.0 | 1.1 | 1.0 | DIB1        | 2866091..2 Component of the U4/U6.U5 snRNP      | orf19.9531          | 8685  | CaDIB1      | CELL CYCLE AND DNA PROCESSING                             | RNA binding                                                   |
| CA0469 | 1.0 | 1.0 | 0.9 | 1.0 | 0.9 | 1.0 | IPF18977    | 2869617..2 similar to Saccharomyces cerevisi    | orf19.2621          | 18977 | IPF18977    | TRANSCRIPTION SUBCELLULAR LOCALISATION                    | RNA binding                                                   |
| CA0470 | 1.0 | 0.9 | 0.9 | 1.0 | 1.1 | 1.0 | YPT32       | complemer small GTP-binding protein essenti     | orf19.2622          | 12928 | CaYPT32     | CELLULAR TRANSPORT AND TRANSPORT MECHANISMS               | SUBCELL hydrolase activity                                    |
| CA0471 | 1.0 | 1.0 | 0.9 | 0.9 | 1.0 | 1.0 | ECM22       | complemer putative protein involved in cell wa  | orf19.2623          | 12926 | CaECM22     | Lipid fatty-acid and isoprenoid metabolism                | ***TRANSCRIPTION                                              |
| CA0472 | 0.9 | 1.0 | 0.9 | 1.0 | 1.1 | 0.9 | STL1        | 2879598..2 sugar transporter (by homology)      | orf19.1317          | 19866 | CaSTL1      | C-compound and carbohydrate metabolism                    | SUBCELLULAR LOCALISATION                                      |
| CA0473 | 1.0 | 1.0 | 1.0 | 1.0 | 1.0 | 0.9 | GRP1        | 2886031..2 dihydroflavonol-4-reductases (by     | orf19.1224          | 12888 | CaGRP1      | Metabolism of vitamins cofactors and prosthetic groups    | transporter activity                                          |
| CA0474 | 1.0 | 1.1 | 1.0 | 1.0 | 1.1 | 1.0 | IPF12887    | complemer Putative multidrug protein (by hom    | orf19.1224          | 12887 | IPF12887    | TRANSPORT FACILITATION                                    |                                                               |
| CA0475 | 1.1 | 0.9 | 1.0 | 1.0 | 1.0 | 1.1 | IPF2580     | 2891145..2 unknown function                     | orf19.8085          | 2580  | IPF2580     | TRANSCRIPTION SUBCELLULAR LOCALISATION                    | transcription regulator activity                              |
| CA0476 | 1.0 | 1.0 | 0.9 | 1.0 | 1.0 | 1.0 | UBP2        | complemer Ubiquitin-specific proteinase (by     | orf19.8088          | 2578  | CaUBP2      | PROTEIN FATE [folding modification destination]           | ***SUBCELLULAR LOC                                            |
| CA0477 | 1.2 | 1.1 | 1.0 | 1.0 | 1.1 | 1.0 | IPF13839    | 2901451..2 unknown function                     | orf19.6017          | 13839 | IPF13839    | No significant S.c. match                                 | peptidase activity                                            |
| CA0478 | 1.1 | 1.1 | 1.0 | 1.0 | 0.9 | 1.0 | YAE8        | 2903317..2 GTP-binding protein (by homology     | orf19.1343          | 13843 | CaYAE8      | PROTEIN FATE [folding modification destination]           | ***CELLULAR TRANSP                                            |
| CA0479 | 0.9 | 1.0 | 1.0 | 1.0 | 1.0 | 1.1 | IPF16191    | 2912423..2 similar to Saccharomyces cerevisi    | orf19.2630          | 16191 | IPF16191    | CELL CYCLE AND DNA PROCESSING SUBCELLULAR LOCALISATION    | protein binding                                               |
| CA0480 | 1.0 | 1.0 | 1.1 | 1.0 | 1.0 | 0.9 | IPF8610     | complemer permease (by homology)                | orf19.2633          | 8610  | IPF8610     | C-compound and carbohydrate metabolism                    | CELLULAR TRANSPORT AND TRANSPORT MECHANISMS                   |
| CA0481 | 0.9 | 1.0 | 1.0 | 1.0 | 1.0 | 1.0 | STE14       | 2922192..2 farnesyl cystein carboxyl-methyltr   | orf19.7766          | 14764 | CaSTE14     | Lipid fatty-acid and isoprenoid metabolism                | ****PROTEIN FATE [folding m                                   |
| CA0482 | 1.1 | 1.1 | 1.0 | 1.1 | 1.0 | 1.1 | IPF14763    | complemer delta-12 fatty acid desaturase (by    | orf19.7765          | 14763 | IPF14763    | No significant S.c. match                                 | transferase activity                                          |
| CA0483 | 1.1 | 1.0 | 0.9 | 1.0 | 1.0 | 1.0 | SEC9        | complemer transport protein (by homology)       | orf19.7764          | 19868 | CaSEC9      | CELLULAR TRANSPORT AND TRANSPORT MECHANISMS               | CELL FA1 transporter activity                                 |
| CA0484 | 1.0 | 0.9 | 1.3 | 1.1 | 1.1 | 1.0 | IPF19622    | 2928945..2 unknown function                     | orf19.7762          | 19622 | IPF19622    | No significant S.c. match                                 |                                                               |
| CA0485 | 1.0 | 0.9 | 1.0 | 0.9 | 1.0 | 1.0 | IPF17574    | 2936416..2 Unknown function                     | orf19.1103          | 17574 | IPF17574    | UNCLASSIFIED PROTEINS                                     | molecular_function unknown                                    |
| CA0486 | 0.9 | 1.0 | 1.0 | 1.0 | 1.0 | 1.0 | IPF15540    | 2949943..2 unknown function                     | orf19.258           | 13725 | IPF15540    | No significant S.c. match                                 |                                                               |
| CA0487 | 1.1 | 1.0 | 0.9 | 0.9 | 1.0 | 1.0 | IPF13724    | 2951078..2 unknown function                     | orf19.259           | 13724 | IPF13724    | No significant S.c. match                                 |                                                               |
| CA0488 | 1.1 | 1.0 | 1.0 | 1.0 | 0.9 | 0.9 | SEC59       | complemer Dolichol kinase (by homology)         | orf19.261           | 13722 | CaSEC59     | Lipid fatty-acid and isoprenoid metabolism                | ***CELL FATE SUBCELLULAF                                      |
| CA0489 | 1.0 | 0.9 | 1.0 | 1.1 | 1.0 | 1.1 | IPF6960     | 2957473..2 unknown function                     | orf19.2636          | 6960  | IPF6960     | UNCLASSIFIED PROTEINS                                     | transferase activity                                          |
| CA0490 | 1.1 | 1.1 | 1.0 | 1.0 | 1.0 | 1.0 | COS161      | 2958234..2 involved in manganese homeostas      | orf19.2637          | 6961  | CaCOS161    | REGULATION OF/INTERACTION WITH CELLULAR ENVIRONMENT       | SUBCELLULAR LOCALISATION                                      |
| CA0491 | 1.0 | 1.0 | 1.0 | 1.0 | 1.1 | 1.0 | IPF18966    | 2965098..2 unknown function                     |                     | 18966 | IPF18966    | No significant S.c. match                                 |                                                               |
| CA0492 | 1.0 | 0.9 | 1.1 | 1.1 | 1.1 | 1.0 | SNU71       | complemer Associated with U1 snRNP (by ho       | orf19.9068          | 14405 | CaSNU71     | TRANSCRIPTION SUBCELLULAR LOCALISATION                    | RNA binding                                                   |
| CA0493 | 1.1 | 1.0 | 1.0 | 1.0 | 1.0 | 1.0 | PRP39.3     | 2967769..2 pre-mRNA splicing factor, 3-prime    | orf19.1492          | 14401 | CaPRP39.3   | TRANSCRIPTION SUBCELLULAR LOCALISATION                    | RNA binding                                                   |
| CA0494 | 1.0 | 1.1 | 1.0 | 0.9 | 1.0 | 0.9 | RAD7        | complemer nucleotide excision repair protein    | orf19.9070          | 14400 | CaRAD7      | CELL CYCLE AND DNA PROCESSING SUBCELLULAR LOCALISATION    | DNA binding                                                   |
| CA0495 | 2.5 | 3.9 | 0.8 | 0.7 | 0.6 | 1.0 | IPF20056    | 2975622..2 unknown function                     | orf19.2659          | 20057 | IPF20056    | UNCLASSIFIED PROTEINS                                     | molecular_function unknown                                    |
| CA0496 | 1.0 | 1.0 | 1.0 | 1.1 | 1.0 | 1.0 | IPF11644    | complemer unknown function                      | orf19.2660          | 11644 | IPF11644    | UNCLASSIFIED PROTEINS                                     | transferase activity                                          |
| CA0498 | 1.0 | 0.9 | 1.0 | 1.1 | 0.9 | 1.0 | CTA211.3F   | 2982842..2 transcriptional activator, 3-prime e | orf19.2661          | 11534 | CaCTA211    | No significant S.c. match                                 |                                                               |
| CA0499 | 1.0 | 1.1 | 1.1 | 1.0 | 1.0 | 0.9 | IFA9        | 2983962..2 unknown function                     | orf19.2663          | 11533 | CaIfA9      | Nucleotide metabolism                                     | CELL CYCLE AND DNA PROCESSING CELLULAR COMMUNICATION/SIGNAL T |
| CA0500 | 1.0 | 1.1 | 1.0 | 1.1 | 1.0 | 1.0 | IPF20058    | 2997081..2 unknown function                     | orf19.4793          | 20058 | IPF20058    | UNCLASSIFIED PROTEINS                                     | molecular_function unknown                                    |
| CA0501 | 1.1 | 1.1 | 1.0 | 1.0 | 1.1 | 1.1 | IPF16501    | complemer unknown function                      | orf19.1225          | 16501 | IPF16501    | TRANSCRIPTION CELLULAR TRANSPORT AND TRANSPORT MECHANISMS | SUBCELLULAR LOCALIS                                           |
| CA0502 | 1.0 | 0.9 | 1.1 | 1.1 | 1.1 | 1.1 | IPF16761    | 3004358..3 unknown function                     | orf19.2664          | 16761 | IPF16761    | TRANSPOSABLE ELEMENTS VIRAL AND PLASMID                   | PROTEINS molecular_function unknown                           |
| CA0503 | 1.1 | 1.0 | 1.0 | 1.0 | 1.0 | 1.0 | PMT6        | complemer protein mannosyltransf protein mar    | orf19.3802          | 9088  | CaPMT6      | C-compound and carbohydrate metabolism                    | ***PROTEIN FATE [folding modification destination]            |
| CA0504 | 1.1 | 1.0 | 1.0 | 1.0 | 1.0 | 0.9 | IPF16466    | complemer unknown function                      | orf19.2778          | 16466 | IPF16466    | UNCLASSIFIED PROTEINS                                     | molecular_function unknown                                    |
| CA0505 | 1.0 | 0.9 | 1.0 | 0.9 | 0.9 | 1.0 | IPF11988.3  | complemer unknown function, 3-prime end         |                     | 18957 | IPF11988.3  | No significant S.c. match                                 |                                                               |
| CA0506 | 1.0 | 1.0 | 1.1 | 1.0 | 1.0 | 1.0 | IPF11988    | complemer unknown function                      | orf19.3626          | 11988 | IPF11988    | Amino acid metabolism                                     | molecular_function unknown                                    |
| CA0507 | 1.0 | 1.0 | 1.0 | 1.0 | 1.0 | 1.0 | IPF11989    | complemer unknown function                      | orf19.3625          | 11989 | IPF11989    | PROTEIN FATE [folding modification destination]           |                                                               |
| CA0508 | 1.0 | 1.1 | 1.0 | 1.1 | 1.0 | 1.0 | IPF11991    | complemer similar to Saccharomyces cerevisi     | orf19.1110          | 11991 | IPF11991    | Nucleotide metabolism                                     | TRANSCRIPTION SUBCELLULAR LOCALISATION                        |
| CA0509 | 1.1 | 1.1 | 1.1 | 0.9 | 1.1 | 1.0 | CDC24       | 3045005..3 GTP/GDP exchange fa                  | unnamed porf19.1068 | 19624 | CaCDC24     | CELL CYCLE AND DNA PROCESSING REGULATION OF/INTERACTIO    | signal transducer activity                                    |
| CA0510 | 1.1 | 1.1 | 1.0 | 1.0 | 1.0 | 1.0 | ETF1        | 3048333..3 ETF-UBIQUINONE OXIDOREDU             | orf19.1068          | 16916 | CaETF1      | ENERGY                                                    | oxidoreductase activity                                       |
| CA0511 | 0.9 | 0.9 | 1.0 | 1.0 | 1.0 | 1.0 | IPF13975    | 3057583..3 unknown function                     | orf19.4953          | 13975 | IPF13975    | UNCLASSIFIED PROTEINS                                     | molecular_function unknown                                    |
| CA0512 | 1.0 | 1.0 | 1.0 | 1.1 | 0.9 | 1.0 | VMA16       | complemer H+-ATPase 23 KD subunit, vacuol       | orf19.4954          | 13974 | CaVMA16     | SUBCELLULAR LOCALISATION TRANSPORT FACILITATION           | transporter activity                                          |
| CA0513 | 1.0 | 0.9 | 1.1 | 0.9 | 0.9 | 1.0 | IPF13972    | 3060211..3 unknown function                     | orf19.4955          | 13972 | IPF13972    | CELL CYCLE AND DNA PROCESSING CELL FATE                   | molecular_function unknown                                    |
| CA0514 | 0.9 | 1.0 | 1.0 | 1.2 | 1.1 | 1.0 | BEM1        | 3064900..3 bud emergence mediator (by hom       | orf19.4645          | 13602 | CaBEM1      | CELL CYCLE AND DNA PROCESSING CELL FATE SUBCELLULAR LOC   | protein binding                                               |
| CA0516 | 0.9 | 1.0 | 1.0 | 1.0 | 0.9 | 1.0 | IPF11526    | 3073275..3 unknown function                     | orf19.2804          | 11526 | IPF11526    | No significant S.c. match                                 |                                                               |
| CA0517 | 1.0 | 1.0 | 1.1 | 1.0 | 0.9 | 1.0 | HEM13       | complemer by homology S. cerev.: coproporpt     | orf19.2803          | 11525 | CaHEM13     | Metabolism of vitamins cofactors and prosthetic groups    | ***SUBCELLULAF                                                |
| CA0519 | 1.1 | 1.1 | 1.1 | 1.0 | 1.1 | 0.9 | MRPL10.3    | 3081012..3 ribosomal protein, 3-prime end (by   | orf19.1101          | 19871 | CaMRPL10.3  | PROTEIN SYNTHESIS SUBCELLULAR LOCALISATION                | structural molecule activity                                  |
| CA0520 | 1.1 | 1.0 | 1.1 | 0.9 | 0.9 | 1.0 | IPF4466     | complemer unknown function                      | orf19.3531          | 4466  | IPF4466     | UNCLASSIFIED PROTEINS                                     |                                                               |

|        |     |     |     |     |     |     |              |                                                          |            |       |           |                                                                                           |                                  |
|--------|-----|-----|-----|-----|-----|-----|--------------|----------------------------------------------------------|------------|-------|-----------|-------------------------------------------------------------------------------------------|----------------------------------|
| CA0521 | 1.0 | 1.0 | 0.9 | 1.0 | 1.0 | 0.9 | CKA2         | 3083229..3 casein kinase II alpha chain (by homol        | orf19.3530 | 4465  | CaCKA2    | CELL CYCLE AND DNA PROCESSING TRANSCRIPTION SUBCELLUL                                     | protein kinase activity          |
| CA0522 | 1.0 | 1.0 | 1.0 | 1.0 | 1.0 | 1.0 | IPF4463      | complemer unknown function                               | orf19.1101 | 4463  | IPF4463   | CELLULAR TRANSPORT AND TRANSPORT MECHANISMS SUBCELLULAR LOCALISATION                      | TRANSP                           |
| CA0523 | 0.9 | 1.0 | 1.0 | 1.0 | 1.1 | 1.0 | IPF4459      | 3087654..3 unknown function                              | orf19.1101 | 4459  | IPF4459   | UNCLASSIFIED PROTEINS                                                                     | molecular_function unknown       |
| CA0524 | 1.1 | 1.0 | 1.0 | 0.9 | 1.0 | 1.0 | CYT12        | 3089174..3 cytochrome-c1 (by homology)                   | orf19.1101 | 18952 | CaCYT12   | ENERGY SUBCELLULAR LOCALISATION                                                           |                                  |
| CA0525 | 1.1 | 1.1 | 1.0 | 1.0 | 0.9 | 1.0 | MSB1         | 3093273..3 Morphogenesis-related protein (by orf19.8726  |            | 6172  | CaMSB1    | CELL FATE                                                                                 | molecular_function unknown       |
| CA0526 | 1.0 | 1.1 | 1.0 | 0.9 | 1.0 | 1.1 | BUB3         | complemer cell cycle arrest protein (by homol            | orf19.2655 | 10586 | CaBUB3    | CELL CYCLE AND DNA PROCESSING                                                             | molecular_function unknown       |
| CA0528 | 0.9 | 1.0 | 1.1 | 1.0 | 1.0 | 1.0 | ANP1         | complemer Golgi mannosyltransferase (by hor              | orf19.3622 | 5178  | CaANP1    | PROTEIN FATE [folding modification destination] ""SUBCELLULAR LOC                         | transferase activity             |
| CA0529 | 0.9 | 1.0 | 1.0 | 1.1 | 1.0 | 1.0 | SMC2         | complemer chromosome segregation protein (orf19.3623     |            | 11993 | CaSMC2    | CELL CYCLE AND DNA PROCESSING PROTEIN SYNTHESIS SUBCE                                     | DNA binding                      |
| CA0530 | 1.0 | 1.0 | 1.0 | 1.0 | 1.0 | 1.0 | IPF19633.3EC | 3132995..3 similar to Saccharomyces cerevisi             | orf19.8685 | 19634 | IPF19633. | TRANSCRIPTION CELL FATE SUBCELLULAR LOCALISATION                                          | RNA binding                      |
| CA0531 | 1.0 | 1.0 | 1.1 | 1.0 | 0.9 | 1.1 | UBC1         | 3139627..3 ubiquitin-conjugating enzyme by h             | orf19.8686 | 10066 | CaUBC1    | PROTEIN FATE [folding modification destination] ""CELLULAR TRANSPORT AND TRANSPORT MECHAN |                                  |
| CA0532 | 1.0 | 1.0 | 1.0 | 1.0 | 1.1 | 1.0 | IRE1         | 3142571..3 protein kinase (by homology)                  | orf19.5068 | 16157 | CaIRE1    | Lipid fatty-acid and isoprenoid metabolism ""CELL CYCLE AND DNA PR                        | protein kinase activity          |
| CA0533 | 1.0 | 1.0 | 1.0 | 1.0 | 1.1 | 1.1 | IPF19872     | complemer unknown function                               | orf19.5067 | 19872 | IPF19872  | UNCLASSIFIED PROTEINS                                                                     | molecular_function unknown       |
| CA0534 | 0.9 | 0.9 | 1.0 | 0.9 | 0.8 | 0.9 | IPF15607     | 3147427..3 unknown function                              | orf19.5066 | 15607 | IPF15607  | UNCLASSIFIED PROTEINS                                                                     | molecular_function unknown       |
| CA0535 | 1.0 | 1.0 | 0.9 | 0.9 | 1.0 | 0.9 | IPF15606     | 3150263..3 similar to Saccharomyces cerevisi             | orf19.5065 | 15606 | IPF15606  | PROTEIN FATE [folding modification destination] ""CONTROL OF CELL                         | molecular_function unknown       |
| CA0536 | 1.0 | 1.0 | 1.0 | 0.9 | 1.0 | 0.9 | PANC.3       | 3153095..3 pantothenate synthetase, 3-prime              | orf19.2815 | 18946 | CaPANC.3  | Metabolism of vitamins cofactors and prosthetic groups                                    | ligase activity                  |
| CA0537 | 1.0 | 1.1 | 1.0 | 1.0 | 1.0 | 0.9 | PRP16        | complemer RNA-dependent ATPase (by hom                   | orf19.2818 | 19698 | CaPRP16   | TRANSCRIPTION SUBCELLULAR LOCALISATION                                                    | RNA binding,helicase activity    |
| CA0538 | 1.1 | 1.0 | 0.9 | 1.0 | 1.0 | 1.0 | IPF10901     | 3157112..3 unknown function                              | orf19.2819 | 10901 | IPF10901  | No significant S.c. match                                                                 |                                  |
| CA0539 | 1.0 | 1.1 | 1.1 | 1.0 | 1.0 | 1.0 | NUP57        | complemer nuclear pore protein (by homology              | orf19.2820 | 10900 | CaNUP57   | CELLULAR TRANSPORT AND TRANSPORT MECHANISMS SUBCELL                                       | structural molecule activity     |
| CA0540 | 1.1 | 1.0 | 1.0 | 0.9 | 1.0 | 0.9 | IPF10896     | complemer NADH dehydrogenase (ubiquinon                  | orf19.2821 | 10896 | IPF10896  | No significant S.c. match                                                                 |                                  |
| CA0541 | 0.9 | 1.0 | 0.9 | 1.0 | 1.1 | 0.9 | IPF14574     | complemer unknown function                               | orf19.1083 | 14574 | IPF14574  | UNCLASSIFIED PROTEINS                                                                     | molecular_function unknown       |
| CA0543 | 0.9 | 1.0 | 1.0 | 1.0 | 1.0 | 1.1 | IPF3255      | complemer similar to Saccharomyces cerevisi              | orf19.2867 | 3255  | IPF3255   | PROTEIN FATE [folding modification destination] ""SUBCELLULAR LOC                         | transporter activity             |
| CA0544 | 1.0 | 1.1 | 1.0 | 1.0 | 0.9 | 1.0 | IPF3252      | 3175336..3 unknown function                              | orf19.2868 | 3252  | IPF3252   | No significant S.c. match                                                                 |                                  |
| CA0545 | 0.9 | 0.9 | 1.0 | 1.0 | 1.1 | 1.0 | IPF3251      | 3176156..3 unknown function                              | orf19.2869 | 3251  | IPF3251   | No significant S.c. match                                                                 |                                  |
| CA0546 | 1.0 | 1.0 | 1.0 | 1.0 | 1.0 | 1.1 | IPF3250      | 3176959..3 unknown function                              | orf19.2870 | 3250  | IPF3250   | No significant S.c. match                                                                 |                                  |
| CA0548 | 0.9 | 1.0 | 1.1 | 1.1 | 1.0 | 1.1 | PHO87        | 3183582..3 Member of the phosphate permea                | orf19.2454 | 14853 | CaPHO87   | Phosphate metabolism REGULATION OF/INTERACTION WITH CELLUI                                | transporter activity             |
| CA0549 | 1.0 | 1.0 | 1.1 | 1.0 | 1.0 | 1.0 | IPF14031     | 3188241..3 putative secreted aspartic proteas            | orf19.852  | 14031 | IPF14031  | PROTEIN FATE [folding modification destination] ""SUBCELLULAR LOCALISATION                |                                  |
| CA0550 | 1.0 | 1.1 | 1.1 | 1.0 | 1.0 | 1.0 | IPF14030     | complemer unknown function                               | orf19.851  | 14030 | IPF14030  | PROTEIN FATE [folding modification destination]                                           |                                  |
| CA0551 | 1.1 | 0.9 | 0.8 | 0.9 | 0.9 | 0.8 | CDC37        | complemer Cell division control prc Cdc37 [Car           | orf19.5531 | 4339  | CaCDC37   | CELL CYCLE AND DNA PROCESSING ""PROTEIN FATE [folding modifi                              | chaperone activity               |
| CA0552 | 1.0 | 1.0 | 1.0 | 1.0 | 1.1 | 1.0 | IPF4343      | complemer similar to Saccharomyces cerevisi              | orf19.5533 | 4343  | IPF4343   | PROTEIN FATE [folding modification destination] ""CELLULAR TRANSP                         | enzyme regulator activity        |
| CA0553 | 1.0 | 0.9 | 1.0 | 1.0 | 1.1 | 1.0 | IPF16653     | complemer unknown function                               | orf19.5534 | 16653 | IPF16653  | UNCLASSIFIED PROTEINS                                                                     | molecular_function unknown       |
| CA0554 | 1.1 | 1.1 | 1.0 | 1.0 | 1.0 | 1.0 | HAS1         | 3205905..3 ATP-DEPENDENT RNA HELICAS                     | orf19.1144 | 5784  | CaHAS1    | CELL CYCLE AND DNA PROCESSING                                                             | molecular_function unknown       |
| CA0555 | 1.0 | 1.0 | 1.0 | 0.9 | 1.0 | 1.0 | HYS2         | 3207834..3 DNA-directed DNA polymerase de                | orf19.3960 | 5785  | CaHYS2    | CELL CYCLE AND DNA PROCESSING SUBCELLULAR LOCALISATIO                                     | nucleotidyltransferase activity  |
| CA0556 | 1.0 | 1.0 | 1.0 | 1.0 | 0.9 | 0.9 | IPF15920     | complemer zinc-finger containing protein (by hor         | orf19.4972 | 15920 | IPF15920  | TRANSCRIPTION SUBCELLULAR LOCALISATION                                                    |                                  |
| CA0557 | 1.0 | 1.0 | 1.2 | 1.3 | 1.1 | 1.2 | HYR1.53      | 3223440..3 Hyphally regulated protein, internal fragment |            | 7957  | CaHYR1.5  | Hypha-specific No significant S.c. match                                                  |                                  |
| CA0558 | 0.9 | 0.9 | 0.7 | 0.5 | 0.8 | 0.4 | GPX2         | 3225137..3 glutathione peroxidase (by homol              | orf19.85   | 13205 | CaGPX2    | CELL RESCUE DEFENSE AND VIRULENCE                                                         |                                  |
| CA0559 | 1.0 | 0.9 | 0.9 | 1.0 | 1.1 | 0.9 | GPX1         | 3227250..3 glutathione peroxidase (by homol              | orf19.86   | 13207 | CaGPX1    | CELL RESCUE DEFENSE AND VIRULENCE                                                         | oxidoreductase activity          |
| CA0560 | 1.0 | 1.0 | 1.0 | 1.0 | 0.9 | 0.9 | GPX3         | 3229232..3 glutathione peroxidase (by homol              | orf19.87   | 13211 | CaGPX3    | CELL RESCUE DEFENSE AND VIRULENCE                                                         |                                  |
| CA0561 | 1.0 | 0.9 | 1.0 | 1.0 | 1.1 | 1.0 | CIN4         | complemer GTP-binding protein                            | orf19.2925 | 15237 | CaCIN4    | CELL CYCLE AND DNA PROCESSING SUBCELLULAR LOCALISATION                                    |                                  |
| CA0562 | 1.0 | 1.0 | 1.1 | 1.0 | 1.0 | 1.0 | PSO2         | 3232781..3 Interstrand crosslink repair protein          | orf19.2926 | 15236 | CaPSO2    | CELL CYCLE AND DNA PROCESSING SUBCELLULAR LOCALISATIO                                     | DNA binding                      |
| CA0563 | 1.0 | 1.1 | 1.0 | 0.9 | 0.9 | 0.9 | MNN11        | complemer Mannosyltransferase complex con                | orf19.2927 | 14216 | CaMNN11   | PROTEIN FATE [folding modification destination]                                           | transferase activity             |
| CA0565 | 1.1 | 1.0 | 1.0 | 0.9 | 1.1 | 1.1 | IPF13526     | complemer unknown function                               | orf19.6250 | 13526 | IPF13526  | CELLULAR TRANSPORT AND TRANSPORT MECHANISMS                                               | molecular_function unknown       |
| CA0566 | 1.1 | 1.1 | 1.0 | 1.0 | 1.0 | 1.0 | IPF13522     | 3242173..3 unknown function                              | orf19.6252 | 13522 | IPF13522  | SUBCELLULAR LOCALISATION                                                                  | transcription regulator activity |
| CA0567 | 1.3 | 1.7 | 0.7 | 0.6 | 0.7 | 1.2 | RPS23        | complemer Ribosomal function S23 (by homol               | orf19.1363 | 13519 | CaRPS23   | PROTEIN SYNTHESIS SUBCELLULAR LOCALISATION                                                | structural molecule activity     |
| CA0568 | 0.9 | 1.0 | 1.0 | 1.0 | 1.0 | 1.0 | APS2         | 3246330..3 AP-2 complex subunit, sigma2 sut              | orf19.8729 | 16570 | CaAPS2    | PROTEIN FATE [folding modification destination] ""CELLULAR TRANSP                         | molecular_function unknown       |
| CA0569 | 0.9 | 0.9 | 1.0 | 1.1 | 1.0 | 1.0 | CDC8         | complemer dTMP kinase (by homology)                      | orf19.8730 | 16571 | CaCDC8    | Nucleotide metabolism SUBCELLULAR LOCALISATION                                            | transferase activity             |
| CA0570 | 1.0 | 1.0 | 1.0 | 1.0 | 1.1 | 1.1 | SVL3         | 3250629..3 Involved in vacuole function (by h            | orf19.8732 | 17015 | CaSVL3    | CELL FATE                                                                                 | molecular_function unknown       |
| CA0571 | 1.0 | 0.9 | 1.0 | 0.9 | 1.0 | 1.0 | CDC43        | 3256714..3 geranylgeranyltransfer:geranylger             | orf19.9369 | 14866 | CaCDC43   | Lipid fatty-acid and isoprenoid metabolism ""CELL CYCLE AND DNA PR                        | signal transducer activity       |
| CA0572 | 1.1 | 1.1 | 0.9 | 1.0 | 1.0 | 0.9 | IPF14864     | 3258387..3 unknown function                              | orf19.9370 | 18938 | IPF14864  | CELLULAR TRANSPORT AND TRANSPORT MECHANISMS SUBCELL                                       | transporter activity             |
| CA0573 | 1.1 | 1.2 | 1.0 | 1.1 | 1.0 | 1.1 | PEX14        | 3259960..3 peroxisomal protein (by homology)             | orf19.9371 | 15186 | CaPEX14   | PROTEIN FATE [folding modification destination] ""CELLULAR TRANSP                         | protein binding                  |
| CA0574 | 1.0 | 1.0 | 1.0 | 1.0 | 1.0 | 1.1 | IPF15183     | 3262553..3 unknown function                              | orf19.9373 | 15183 | IPF15183  | No significant S.c. match                                                                 |                                  |
| CA0575 | 1.0 | 1.0 | 1.0 | 1.0 | 1.0 | 1.0 | IPF15178     | 3264478..3 Unknown function                              | orf19.1808 | 15178 | IPF15178  | No significant S.c. match                                                                 |                                  |
| CA0576 | 1.0 | 1.0 | 1.0 | 1.0 | 1.1 | 1.0 | NPR1         | 3271396..3 nitrogen permease reactivator prot            | orf19.6232 | 12521 | CaNPR1    | Nitrogen and sulphur metabolism CELLULAR TRANSPORT AND TRANSPORT MECHANISMS               |                                  |
| CA0577 | 1.0 | 1.0 | 1.1 | 1.0 | 1.0 | 1.0 | IPF16051     | 3276393..3 unknown function                              | orf19.3068 | 16051 | IPF16051  | TRANSCRIPTION                                                                             |                                  |
| CA0578 | 1.0 | 0.9 | 1.1 | 1.0 | 1.0 | 1.0 | IPF9605      | 3283180..3 similar to Saccharomyces cerevisi             | orf19.3071 | 9605  | IPF9605   | CELL CYCLE AND DNA PROCESSING                                                             | protein phosphatase activity     |
| CA0579 | 1.0 | 1.1 | 1.0 | 1.1 | 1.0 | 1.0 | IPF3184.EXO1 | 3296789..3 unknown function, exon 1                      | orf19.3560 | 3184  | IPF3184.e | UNCLASSIFIED PROTEINS                                                                     |                                  |
| CA0580 | 1.0 | 1.0 | 1.0 | 1.0 | 1.0 | 1.0 | IPF3184.EXO1 | 3297542..3 unknown function, exon 2                      | orf19.3559 | 3182  | IPF3184.e | UNCLASSIFIED PROTEINS                                                                     | structural molecule activity     |
| CA0581 | 1.0 | 1.0 | 1.0 | 1.0 | 1.0 | 1.0 | IPF3181      | 3298373..3 similar to Saccharomyces cerevisi             | orf19.3558 | 3181  | IPF3181   | CELLULAR TRANSPORT AND TRANSPORT MECHANISMS                                               | molecular_function unknown       |
| CA0582 | 0.9 | 1.0 | 1.0 | 1.0 | 1.0 | 0.9 | IPF3180      | 3299065..3 unknown function                              | orf19.1104 | 3180  | IPF3180   | UNCLASSIFIED PROTEINS                                                                     | molecular_function unknown       |
| CA0583 | 0.9 | 1.0 | 1.0 | 1.1 | 1.0 | 1.2 | GSH1.EXON2   | complemer gamma-glutamylcysteine syntheta                | orf19.1252 | 12218 | CaGSH1.e  | CELL RESCUE DEFENSE AND VIRULENCE                                                         | ligase activity                  |
| CA0584 | 1.0 | 1.0 | 1.0 | 1.1 | 1.0 | 1.0 | GSH1.EXON1   | complemer Gamma-glutamylcysteine syntheta                | orf19.1252 | 18932 | CaGSH1.e  | CELL RESCUE DEFENSE AND VIRULENCE                                                         |                                  |
| CA0585 | 1.1 | 1.1 | 0.9 | 1.0 | 1.0 | 1.1 | ADE5.7       | complemer phosphoribosylamine-glycine ligas              | orf19.1252 | 13495 | CaADE5.7  | Nucleotide metabolism Purine ribonucleotide metabolism                                    | ligase activity                  |
| CA0586 | 1.1 | 1.0 | 1.1 | 1.0 | 0.9 | 1.1 | IPF13493     | 3310418..3 Unknown function                              | orf19.1252 | 17932 | IPF13493  | PROTEIN FATE [folding modification destination] ""CELLULAR TRANSPORT AND TRANSPORT MECHAN |                                  |
| CA0587 | 0.9 | 1.0 | 1.0 | 1.0 | 1.0 | 1.1 | SPO14.5EOC   | complemer phospholipase D, 5-prime end                   | orf19.8753 | 13085 | CaSPO14.  | Lipid fatty-acid and isoprenoid metabolism ""CELL CYCLE AND DNA PR                        | hydrolase activity               |
| CA0588 | 1.0 | 1.0 | 1.0 | 1.0 | 1.0 | 1.0 | IPF13081     | complemer unknown function                               | orf19.1162 | 13081 | IPF13081  | No significant S.c. match                                                                 |                                  |
| CA0589 | 1.0 | 1.1 | 1.0 | 1.0 | 1.0 | 1.0 | IPF13080     | complemer unknown function                               |            | 13080 | IPF13080  | UNCLASSIFIED PROTEINS                                                                     |                                  |
| CA0590 | 1.1 | 0.9 | 1.0 | 1.0 | 0.9 | 1.0 | IPF13079     | 3317420..3 unknown function                              | orf19.8756 | 13079 | IPF13079  | UNCLASSIFIED PROTEINS                                                                     | molecular_function unknown       |
| CA0591 | 1.0 | 1.1 | 0.9 | 1.0 | 1.0 | 0.9 | ALS3.5EOC    | complemer agglutinin-like protein, 5-prime enc           | orf19.1816 | 12561 | CaALS3.5e | CELL FATE SUBCELLULAR LOCALISATION Hypha-specific                                         | signal transducer activity       |
| CA0592 | 1.0 | 1.0 | 1.0 | 1.1 | 1.0 | 0.9 | IPF8862      | complemer unknown function                               | orf19.1237 | 8862  | IPF8862   | No significant S.c. match                                                                 |                                  |
| CA0593 | 0.9 | 1.0 | 1.0 | 1.0 | 1.0 | 0.9 | ARP6         | 3333180..3 actin-related protein (by homology            | orf19.4904 | 8861  | CaARP6    | SUBCELLULAR LOCALISATION                                                                  | molecular_function unknown       |
| CA0594 | 1.0 | 0.9 | 0.9 | 0.9 | 1.0 | 0.9 | IPF8860      | complemer similar to Saccharomyces cerevisi              | orf19.1236 | 8860  | IPF8860   | Lipid fatty-acid and isoprenoid metabolism                                                | hydrolase activity               |
| CA0595 | 1.1 | 1.0 | 1.0 | 1.0 | 1.0 | 1.0 | IPF8856      | complemer unknown function                               | orf19.1236 | 8856  | IPF8856   | UNCLASSIFIED PROTEINS                                                                     |                                  |
| CA0596 | 1.0 | 1.2 | 1.0 | 1.0 | 1.0 | 0.9 | IPF9706      | 3349430..3 unknown function                              | orf19.1234 | 9706  | IPF9706   | UNCLASSIFIED PROTEINS                                                                     | molecular_function unknown       |

|        |     |     |     |     |     |     |              |                                                       |               |                |                                                           |                                                       |
|--------|-----|-----|-----|-----|-----|-----|--------------|-------------------------------------------------------|---------------|----------------|-----------------------------------------------------------|-------------------------------------------------------|
| CA0597 | 1.0 | 1.1 | 1.0 | 1.0 | 1.0 | 0.9 | IPF9704      | 3352289..3 similar to Saccharomyces cerevisi          | orf19.1234    | 9704 IPF9704   | TRANSCRIPTION SUBCELLULAR LOCALISATION                    | transcription regulator activity                      |
| CA0598 | 1.0 | 1.0 | 1.0 | 1.0 | 0.9 | 1.0 | IPF9703      | complemer unknown function                            | orf19.1234    | 9703 IPF9703   | No significant S.c. match                                 |                                                       |
| CA0599 | 1.0 | 1.1 | 1.1 | 1.0 | 1.0 | 0.9 | IPF12428     | 3357819..3 unknown function                           | orf19.1018    | 12428 IPF12428 | UNCLASSIFIED PROTEINS                                     | RNA binding                                           |
| CA0600 | 1.1 | 0.8 | 1.0 | 1.0 | 1.0 | 1.1 | MSN5.5F      | 3359459..3 Importin-beta family member requi          | orf19.2666    | 12426 CaMSN5.5 | CELLULAR TRANSPORT AND TRANSPORT MECHANISMS CELL FA1      | protein binding                                       |
| CA0601 | 1.1 | 1.0 | 0.9 | 1.0 | 1.0 | 0.9 | MSN5.3F      | 3361884..3 Importin-beta family member requi          | orf19.1018    | 18929 CaMSN5.3 | CELLULAR TRANSPORT AND TRANSPORT MECHANISMS CELL FATE     |                                                       |
| CA0602 | 0.9 | 1.0 | 1.0 | 1.0 | 1.0 | 1.0 | CTA22        | 3369449..3 Protein with putative transcription        | orf19.3074    | 1708 CaCTA22   | No significant S.c. match                                 |                                                       |
| CA0603 | 1.0 | 0.9 | 1.0 | 0.9 | 1.0 | 1.1 | IPF1709      | complemer unknown function                            | orf19.3076    | 1709 IPF1709   | CLASSIFICATION NOT YET CLEAR-CUT                          | molecular_function unknown                            |
| CA0604 | 0.9 | 0.9 | 1.0 | 0.9 | 0.9 | 1.0 | VID21        | 3370884..3 unknown function                           | orf19.3077    | 1713 CaVID21   | UNCLASSIFIED PROTEINS                                     | molecular_function unknown                            |
| CA0605 | 1.0 | 1.0 | 1.0 | 0.9 | 1.0 | 1.1 | UTR2         | 3376805..3 1,3-1,4-beta-glucanase (by homok           | orf19.9240    | 8080 CaUTR2    | CONTROL OF CELLULAR ORGANIZATION                          | molecular_function unknown                            |
| CA0606 | 1.1 | 1.0 | 0.9 | 0.9 | 0.9 | 1.1 | COP1         | 3378711..3 coatomer complex alpha chain of            | orf19.9241    | 8079 CaCOP1    | CELLULAR TRANSPORT AND TRANSPORT MECHANISMS SUBCELL       | molecular_function unknown                            |
| CA0609 | 1.0 | 0.9 | 0.9 | 0.8 | 1.0 | 0.8 | CDR11.3F     | complemer multidrug resistance protein, 3-prir        | orf19.919     | 12978 CaCDR11  | Lipid fatty-acid and isoprenoid metabolism                | *****CELL RESCUE DEFENSE AND VIRULENCE *****REGULATIO |
| CA0610 | 1.0 | 1.0 | 1.0 | 1.0 | 1.1 | 0.9 | CDR11.5F     | complemer multidrug resistance protein, 5-prir        | orf19.8533    | 12975 CaCDR11  | Lipid fatty-acid and isoprenoid metabolism                | *****CELL RESCUE DEFENSE AND VIRULENCE *****REGULATIO |
| CA0611 | 0.9 | 1.0 | 1.0 | 1.0 | 0.9 | 1.0 | IPF17542     | 3400215..3 unknown function                           | orf19.1302    | 17542 IPF17542 | No significant S.c. match                                 |                                                       |
| CA0612 | 1.0 | 0.9 | 1.0 | 0.9 | 0.9 | 1.0 | IPF17545     | complemer unknown function                            | orf19.5579    | 17545 IPF17545 | No significant S.c. match                                 |                                                       |
| CA0614 | 1.0 | 1.0 | 1.1 | 0.9 | 1.0 | 0.9 | IPF19700     | 3410866..3 unknown function                           | orf19.1600    | 19700 IPF19700 | No significant S.c. match                                 |                                                       |
| CA0615 | 1.2 | 1.1 | 0.8 | 0.9 | 1.0 | 1.2 | RPL3         | 3413519..3 60S large subunit ribosomal protei         | orf19.1601    | 6742 CaRPL3    | PROTEIN SYNTHESIS SUBCELLULAR LOCALISATION                | structural molecule activity                          |
| CA0616 | 0.9 | 0.9 | 1.0 | 1.0 | 1.0 | 1.0 | PHO11        | complemer Secreted acid phosphatase                   | orf19.2619    | 7796 CaPHO11   | Phosphate metabolism                                      | ***Metabolism of vitamins cofactors and prosthetic    |
| CA0617 | 1.0 | 1.0 | 1.1 | 1.1 | 0.9 | 1.0 | MET2         | complemer Homoserine O-acetyltransferase              | orf19.2618    | 7797 CaMET2    | Amino acid metabolism SUBCELLULAR LOCALISATION            | transferase activity                                  |
| CA0618 | 1.0 | 1.0 | 1.0 | 1.0 | 1.0 | 1.1 | UGT51        | complemer UDP-glucose:sterol glucosyltransf           | orf19.2616    | 7800 CaUGT51   | Lipid fatty-acid and isoprenoid metabolism                | transferase activity                                  |
| CA0619 | 1.0 | 1.0 | 1.1 | 1.0 | 1.1 | 1.0 | IPF18924     | 3427421..3 unknown function                           | orf19.3146    | 18924 IPF18924 | No significant S.c. match                                 |                                                       |
| CA0620 | 1.0 | 1.0 | 1.0 | 0.9 | 0.8 | 0.9 | IPF17998     | 3428371..3 unknown function                           | orf19.3147    | 17998 IPF17998 | No significant S.c. match                                 |                                                       |
| CA0621 | 1.0 | 1.0 | 1.0 | 1.0 | 1.0 | 1.0 | IPF17999     | complemer unknown function                            | orf19.3148    | 17999 IPF17999 | No significant S.c. match                                 |                                                       |
| CA0622 | 0.2 | 0.7 | 0.6 | 0.4 | 0.5 | 0.4 | IPF14171     | complemer unknown function                            | orf19.3149    | 14171 IPF14171 | UNCLASSIFIED PROTEINS                                     | molecular_function unknown                            |
| CA0623 | 1.0 | 0.9 | 0.9 | 1.0 | 1.0 | 1.0 | MS54.3       | 3440139..3 phosphatidylinositol-4-phosphate           | orf19.3153    | 15141 CaMSS4.3 | Lipid fatty-acid and isoprenoid metabolism                | ***CELLULAR COMMUNICATION                             |
| CA0624 | 0.9 | 0.9 | 1.0 | 1.0 | 1.0 | 0.8 | IPF312       | 3442861..3 unknown function                           | orf19.3154    | 15139 IPF312   | UNCLASSIFIED PROTEINS                                     | molecular_function unknown                            |
| CA0625 | 1.0 | 1.0 | 1.0 | 1.0 | 1.1 | 1.0 | IPF19637     | 3448212..3 unknown function                           |               | 19638 IPF19637 | No significant S.c. match                                 |                                                       |
| CA0626 | 1.0 | 1.0 | 1.0 | 1.0 | 1.1 | 0.9 | IPF3161      | complemer Unknown function                            | orf19.3161    | 3161 IPF3161   | UNCLASSIFIED PROTEINS                                     | transcription regulator activity                      |
| CA0627 | 2.3 | 4.6 | 2.7 | 2.8 | 1.5 | 1.8 | HSP12        | complemer Heat shock protein (by homology)            | orf19.3160    | 3160 CaHSP12   | C-compound and carbohydrate metabolism                    | ***Lipid fatty-acid and isopren                       |
| CA0628 | 1.0 | 0.9 | 1.0 | 1.0 | 0.9 | 1.0 | IPF3878      | 3458867..3 unknown function                           | orf19.773     | 3878 IPF3878   | UNCLASSIFIED PROTEINS                                     | molecular_function unknown                            |
| CA0629 | 1.0 | 0.9 | 1.0 | 1.0 | 1.0 | 1.0 | IPF3876      | 3460112..3 unknown function                           | orf19.775     | 3876 IPF3876   | REGULATION OF/INTERACTION WITH CELLULAR ENVIRONMENT       |                                                       |
| CA0630 | 1.0 | 0.9 | 1.1 | 1.0 | 1.0 | 1.0 | IPF3875.5EOC | 3463174..3 unknown function, 5-prime end              | orf19.776     | 3875 IPF3875.5 | CELL CYCLE AND DNA PROCESSING CELL FATE                   |                                                       |
| CA0631 | 0.9 | 0.9 | 1.0 | 1.0 | 0.9 | 1.0 | IPF11698     | 3468528..3 similar to Saccharomyces cerevisi          | orf19.1181    | 11698 IPF11698 | TRANSPORT FACILITATION                                    | transporter activity                                  |
| CA0632 | 1.2 | 1.1 | 1.1 | 0.9 | 0.9 | 1.0 | RPS5         | complemer ribosomal protein S5.e (by homolo           | orf19.1181    | 11696 CaRPS5   | PROTEIN SYNTHESIS SUBCELLULAR LOCALISATION                | structural molecule activity                          |
| CA0633 | 1.0 | 1.0 | 1.0 | 1.0 | 1.0 | 1.0 | IPF16269     | complemer unknown function                            | orf19.9340    | 16269 IPF16269 | UNCLASSIFIED PROTEINS                                     | molecular_function unknown                            |
| CA0634 | 1.1 | 1.1 | 1.0 | 1.0 | 1.0 | 1.0 | IPF16267     | 3477624..3 unknown function                           | orf19.1772    | 16267 IPF16267 | UNCLASSIFIED PROTEINS                                     | molecular_function unknown                            |
| CA0635 | 1.1 | 1.0 | 1.0 | 1.1 | 1.0 | 1.0 | IPF9036      | complemer similar to Saccharomyces cerevisi           | orf19.9342    | 9036 IPF9036   | Nitrogen and sulphur metabolism                           | C-compound and carbohydrate metab                     |
| CA0636 | 1.2 | 1.0 | 1.0 | 1.2 | 1.1 | 1.3 | FDH4.3F      | complemer Formate dehydrogenase, 3-prime end (by hon  |               | 18026 CaFDH4.3 | ENERGY                                                    | DNA binding                                           |
| CA0639 | 1.0 | 1.0 | 1.0 | 1.0 | 1.0 | 1.0 | FDH13.3F     | complemer Putative formate dehydrogenase, 3-prime end |               | 18922 CaFDH13  | ENERGY                                                    |                                                       |
| CA0641 | 1.0 | 0.9 | 1.0 | 1.0 | 1.1 | 1.1 | IPF15977     | complemer unknown function                            | orf19.4698    | 15977 IPF15977 | No significant S.c. match                                 |                                                       |
| CA0642 | 1.0 | 0.9 | 1.0 | 0.9 | 1.1 | 1.1 | ERG25        | complemer C-4 sterol methyl oxide C-4 methyl          | orf19.3732    | 9179 CaERG25   | Lipid fatty-acid and isoprenoid metabolism                | ***SUBCELLULAR LOCALISATION                           |
| CA0643 | 1.0 | 1.0 | 1.0 | 0.9 | 0.9 | 1.0 | IDP2         | complemer isocitrate dehydrogenase, cytosol           | orf19.3733    | 9177 CaIDP2    | C-compound and carbohydrate metabolism                    | ENERGY SUBCELLULAR LOCALISATION                       |
| CA0644 | 0.9 | 0.9 | 1.0 | 1.0 | 0.9 | 1.0 | IPF17131     | 3520884..3 unknown function                           | orf19.69      | 17131 IPF17131 | No significant S.c. match                                 |                                                       |
| CA0645 | 1.0 | 1.0 | 1.0 | 1.0 | 1.0 | 1.0 | IPF18917.5EC | 3523342..3 unknown function, 5-prime end              |               | 18917 IPF18917 | PROTEIN FATE [folding modification destination]           | ***CELLULAR TRANSPORT AND TRANSPORT MECHANISMS        |
| CA0646 | 0.9 | 1.0 | 1.0 | 1.0 | 1.1 | 0.8 | IPF19702     | 3524828..3 unknown function                           | orf19.1180    | 19702 IPF19702 | No significant S.c. match                                 |                                                       |
| CA0647 | 1.0 | 0.9 | 1.1 | 1.1 | 1.0 | 1.1 | IPF19706     | complemer unknown function                            | orf19.4334    | 19706 IPF19706 | No significant S.c. match                                 |                                                       |
| CA0648 | 1.1 | 0.9 | 1.0 | 1.0 | 1.0 | 1.0 | IPF12399     | 3540983..3 unknown function                           | orf19.3210    | 12399 IPF12399 | No significant S.c. match                                 |                                                       |
| CA0649 | 1.1 | 1.0 | 1.0 | 1.0 | 1.0 | 1.0 | RFC3         | complemer DNA replication factor C, 40 kDa            | orf19.3211    | 12401 CaRFC3   | CELL CYCLE AND DNA PROCESSING SUBCELLULAR LOCALISATION    | DNA binding                                           |
| CA0650 | 1.0 | 1.0 | 1.1 | 1.0 | 0.9 | 1.0 | IPF11566     | 3546264..3 unknown function                           | orf19.11      | 11566 IPF11566 | No significant S.c. match                                 |                                                       |
| CA0651 | 1.0 | 0.9 | 1.1 | 0.9 | 1.0 | 1.0 | ALK8         | 3547768..3 n-alkane inducible cytochrome P-4          | orf19.10      | 11568 CaALK8   | CELL RESCUE DEFENSE AND VIRULENCE                         | ***CELL FATE CONTROL OF CELLULAR ORGANIZATION         |
| CA0652 | 0.9 | 1.0 | 1.0 | 1.1 | 1.1 | 1.2 | SHP1         | complemer potential regulatory subunit for Glc        | orf19.1008    | 11553 CaSHP1   | ENERGY CELL CYCLE AND DNA PROCESSING                      | PROTEIN SYNTHESIS                                     |
| CA0653 | 1.1 | 0.9 | 1.0 | 1.7 | 1.1 | 1.3 | MET6         | complemer BY HOMOMOLOGY TO S.CEREV.: 5                | orf19.1008    | 11555 CaMET6   | Amino acid metabolism SUBCELLULAR LOCALISATION            | UNCLASSIFIED                                          |
| CA0654 | 0.8 | 1.0 | 1.0 | 1.1 | 1.0 | 1.1 | IPF11550.3F  | complemer Ca2+-transporting P-type ATPase,            | orf19.1008    | 11557 IPF11550 | CELLULAR TRANSPORT AND TRANSPORT MECHANISMS               | REGULATION OF/INTERACTION WITH CELL                   |
| CA0655 | 1.0 | 0.9 | 1.0 | 0.9 | 1.0 | 1.0 | IPF11560.5F  | complemer Ca2+-transporting P-type ATPase,            | orf19.1008    | 11560 IPF11560 | CELLULAR TRANSPORT AND TRANSPORT MECHANISMS               | REGULATION OF/INTERACTION WITH CELL                   |
| CA0656 | 1.0 | 0.9 | 1.0 | 0.9 | 1.0 | 1.0 | IPF12470     | complemer unknown function                            | orf19.5573    | 12470 IPF12470 | No significant S.c. match                                 |                                                       |
| CA0657 | 1.0 | 0.9 | 0.9 | 1.0 | 1.0 | 1.0 | IPF19877     | 3576492..3 putative cysteine synthase (by hon         | orf19.5574    | 19877 IPF19877 | Amino acid metabolism                                     | lyase activity                                        |
| CA0658 | 1.1 | 1.0 | 1.0 | 1.0 | 1.0 | 0.9 | IPF16505     | complemer Unknown function                            | orf19.5575    | 16505 IPF16505 | UNCLASSIFIED PROTEINS                                     | molecular_function unknown                            |
| CA0659 | 1.0 | 1.0 | 1.0 | 1.0 | 0.9 | 1.0 | IPF16189.3F  | complemer panthotenate kinase, 3-prime end            | orf19.5576    | 16507 IPF16189 | UNCLASSIFIED PROTEINS                                     |                                                       |
| CA0660 | 1.0 | 1.0 | 1.0 | 0.9 | 1.0 | 1.0 | IPF16189.5F  | complemer panthotenate kinase, 5-prime end            | orf19.5577    | 16189 IPF16189 | UNCLASSIFIED PROTEINS                                     | transferase activity                                  |
| CA0661 | 1.0 | 1.1 | 1.1 | 1.0 | 1.0 | 0.9 | APG7         | 3586042..3 component of the autophagic syst           | orf19.8326    | 12207 CaAPG7   | CONTROL OF CELLULAR ORGANIZATION SUBCELLULAR LOCALISATION |                                                       |
| CA0662 | 1.0 | 1.0 | 1.0 | 1.0 | 1.0 | 1.0 | SPC97        | 3588160..3 spindle pole body component (by            | orf19.708     | 12206 CaSPC97  | CELL CYCLE AND DNA PROCESSING SUBCELLULAR LOCALISATION    | structural molecule activity                          |
| CA0663 | 1.0 | 1.0 | 1.0 | 1.0 | 1.0 | 1.0 | PUP2         | complemer 20S proteasome subunit(alpha5)              | (orf19.709    | 12205 CaPUP2   | CELL CYCLE AND DNA PROCESSING                             | ***PROTEIN FATE [folding modifi                       |
| CA0664 | 1.0 | 0.9 | 1.1 | 1.0 | 0.9 | 1.3 | LSC2.3EOC1   | complemer succinate-CoA ligase beta subunit           | orf19.710     | 12204 CaLSC2.3 | C-compound and carbohydrate metabolism                    | ENERGY                                                |
| CA0665 | 1.0 | 0.9 | 1.1 | 1.1 | 1.0 | 1.1 | INT1         | 3593265..3 integrin-like protein alp integrin-like    | orf19.1173    | 19580 CaINT1   | CELL FATE SUBCELLULAR LOCALISATION                        | Other virulence attributes                            |
| CA0666 | 1.0 | 1.0 | 1.0 | 0.9 | 1.0 | 1.0 | FIP1         | 3598777..3 Component of pre-mRNA polyade              | orf19.1173    | 18911 CaFIP1   | TRANSCRIPTION SUBCELLULAR LOCALISATION                    | RNA binding                                           |
| CA0667 | 1.0 | 1.1 | 1.0 | 1.0 | 1.0 | 1.0 | TIF5         | complemer Translation initiation factor eIF5          | (b orf19.1173 | 15194 CaTIF5   | PROTEIN SYNTHESIS SUBCELLULAR LOCALISATION                | translation regulator activity,enzym                  |
| CA0669 | 1.1 | 1.0 | 1.0 | 1.0 | 1.0 | 1.0 | IPF5918      | 3603864..3 unknown function                           | orf19.448     | 5918 IPF5918   | UNCLASSIFIED PROTEINS                                     | molecular_function unknown                            |
| CA0670 | 1.0 | 0.9 | 0.9 | 0.7 | 1.0 | 0.9 | IPF5915      | 3606013..3 phosphatidyl synthase (by homolo           | orf19.449     | 5915 IPF5915   | UNCLASSIFIED PROTEINS                                     | molecular_function unknown                            |
| CA0671 | 1.1 | 1.1 | 1.0 | 1.0 | 1.0 | 1.1 | GRP4         | complemer putative reductase (by homology)            | orf19.1066    | 15555 CaGRP4   | Metabolism of vitamins cofactors and prosthetic groups    |                                                       |
| CA0672 | 0.9 | 1.0 | 1.0 | 0.9 | 1.1 | 1.0 | GRP6         | complemer Putative reductase (by homology)            | orf19.3151    | 15804 CaGRP6   | Metabolism of vitamins cofactors and prosthetic groups    |                                                       |
| CA0673 | 1.2 | 1.2 | 1.0 | 1.0 | 1.1 | 1.0 | AMO2         | complemer amine oxidase (by homology)                 | orf19.3152    | 15803 CaAMO2   | CELL CYCLE AND DNA PROCESSING                             |                                                       |
| CA0674 | 1.1 | 1.3 | 0.9 | 0.9 | 1.0 | 0.9 | IPF19608     | complemer unknown function                            | orf19.8770    | 19608 IPF19608 | No significant S.c. match                                 |                                                       |
| CA0675 | 0.9 | 0.9 | 1.1 | 0.9 | 1.0 | 1.0 | IPF13098     | 3623987..3 unknown function                           | orf19.8771    | 13098 IPF13098 | UNCLASSIFIED PROTEINS                                     | molecular_function unknown                            |

|        |     |     |     |     |     |     |              |                                                                |                       |                  |                                                                                   |                                                 |
|--------|-----|-----|-----|-----|-----|-----|--------------|----------------------------------------------------------------|-----------------------|------------------|-----------------------------------------------------------------------------------|-------------------------------------------------|
| CA0676 | 1.0 | 1.0 | 1.0 | 1.0 | 1.0 | 1.0 | IPF13097     | 3625442..3 unknown function                                    | orf19.8772            | 13097 IPF13097   | Lipid fatty-acid and isoprenoid metabolism                                        | ""CELL CYCLE AND DNA PROCESSING CELL FATE       |
| CA0677 | 0.9 | 1.0 | 1.0 | 1.0 | 1.0 | 1.0 | IPF13095     | complemer unknown function                                     | hypotheticaorf19.8773 | 13095 IPF13095   | CELLULAR TRANSPORT AND TRANSPORT MECHANISMS                                       | CONTRO transporter activity                     |
| CA0678 | 1.0 | 0.9 | 1.0 | 0.9 | 1.1 | 1.2 | IPF13094     | 3627562..3 unknown function                                    | orf19.8774            | 13094 IPF13094   | UNCLASSIFIED PROTEINS                                                             | molecular_function unknown                      |
| CA0679 | 1.0 | 1.0 | 1.0 | 1.0 | 1.0 | 0.9 | IPF13885.REF | 3629816..3 unknown function, 5-prime end                       |                       | 13092 IPF13885.r | No significant S.c. match                                                         |                                                 |
| CA0680 | 1.0 | 1.0 | 1.0 | 1.0 | 1.0 | 0.9 | IPF14511.5F  | 3632428..3 unknown function, 5-prime end                       | orf19.1216!           | 14511 IPF14511.! | UNCLASSIFIED PROTEINS                                                             | hydrolase activity                              |
| CA0681 | 0.9 | 1.0 | 1.0 | 1.1 | 1.0 | 1.0 | IPF14511.3F  | 3633712..3 unknown function, 3-prime end                       | orf19.1217!           | 14513 IPF14511.! | UNCLASSIFIED PROTEINS                                                             |                                                 |
| CA0682 | 1.1 | 1.0 | 1.1 | 1.1 | 1.1 | 1.0 | IPF14514     | complemer unknown function                                     | orf19.1217            | 14514 IPF14514   | TRANSCRIPTION                                                                     | transcription regulator activity                |
| CA0683 | 1.0 | 0.9 | 0.9 | 0.9 | 0.8 | 1.0 | IPF14519     | 3636213..3 unknown function                                    | orf19.1217:           | 14519 IPF14519   | No significant S.c. match                                                         |                                                 |
| CA0684 | 1.0 | 1.0 | 1.0 | 1.0 | 0.9 | 1.0 | IPF4450      | complemer unknown function                                     | orf19.1217:           | 4450 IPF4450     | No significant S.c. match                                                         |                                                 |
| CA0685 | 1.0 | 1.0 | 1.2 | 1.0 | 1.0 | 1.0 | ADO1         | complemer adenosine kinase (by homology)                       | orf19.1303:           | 6804 CaADO1      | Nucleotide metabolism Purine ribonucleotide metabolism                            | transferase activity                            |
| CA0686 | 1.1 | 1.3 | 1.1 | 1.0 | 1.0 | 1.1 | IPF162       | complemer sulphate transporter (by homology)                   | orf19.3222            | 162 IPF162       | UNCLASSIFIED PROTEINS                                                             | molecular_function unknown                      |
| CA0687 | 1.0 | 1.0 | 1.1 | 1.0 | 1.1 | 1.0 | CPA2         | 3660069..3 arginine-specific carbamoylphosph                   | orf19.3221            | 4967 CaCPA2      | Amino acid metabolism SUBCELLULAR LOCALISATION                                    | ligase activity                                 |
| CA0688 | 1.0 | 1.0 | 1.0 | 1.1 | 1.0 | 1.0 | IPF10555.3EC | 3664415..3 unknown function, 3-prime end                       | orf19.1215!           | 18902 IPF10555.! | C-compound and carbohydrate metabolism ENERGY                                     |                                                 |
| CA0689 | 1.0 | 1.0 | 1.0 | 0.9 | 0.9 | 0.9 | IPF14119     | 3669098..3 unknown function                                    | orf19.1215:           | 14119 IPF14119   | No significant S.c. match                                                         |                                                 |
| CA0690 | 1.0 | 1.0 | 0.9 | 1.0 | 1.1 | 1.1 | IPF18901.3   | 3671035..3 unknown function, 3-prime end                       |                       | 18901 IPF18901.! | No significant S.c. match                                                         |                                                 |
| CA0691 | 1.2 | 1.0 | 0.9 | 1.1 | 1.1 | 1.1 | CIRT4A       | 3682647..3 Transposase (by homology)                           | orf19.1035:           | 15077 CaCirt4a   | No significant S.c. match                                                         |                                                 |
| CA0692 | 1.0 | 1.0 | 1.1 | 1.0 | 1.1 | 1.0 | PGM2         | 3684723..3 Phosphoglucumutase (by homology)                    | orf19.1035!           | 15073 CaPGM2     | C-compound and carbohydrate metabolism ENERGY SUBCELLULAR LOCALISATION            | isomerase activity                              |
| CA0693 | 1.1 | 1.0 | 1.0 | 1.0 | 1.0 | 1.0 | IPF12606.5EC | complemer unknown function, 5-prime end                        | orf19.3288            | 12606 IPF12606.! | UNCLASSIFIED PROTEINS                                                             | molecular_function unknown                      |
| CA0694 | 0.9 | 1.1 | 1.0 | 1.0 | 1.0 | 1.0 | IPF12603     | complemer unknown function                                     | orf19.3289            | 12603 IPF12603   | No significant S.c. match                                                         |                                                 |
| CA0695 | 1.0 | 1.1 | 1.0 | 1.0 | 1.0 | 1.0 | IPF12601     | 3697815..3 unknown function                                    | orf19.3290            | 12601 IPF12601   | No significant S.c. match                                                         |                                                 |
| CA0696 | 1.0 | 1.0 | 1.0 | 0.9 | 1.1 | 1.0 | HMT1         | 3699135..3 hnRNP methyltransferase (by homology)               | orf19.3291            | 12599 CaHMT1     | PROTEIN FATE [folding modification destination]                                   | ""SUBCELLULAR LOCALISATION transferase activity |
| CA0697 | 1.0 | 1.1 | 1.0 | 1.0 | 1.0 | 1.0 | VTC4         | complemer putative polyphosphate synthetase                    | orf19.3363            | 15753 CaVTC4     | UNCLASSIFIED PROTEINS                                                             | molecular_function unknown                      |
| CA0700 | 1.0 | 1.1 | 1.1 | 1.1 | 0.9 | 1.1 | SHR3         | 3709534..3 endoplasmatic reticulum membrane                    | orf19.3366            | 10396 CaSHR3     | PROTEIN FATE [folding modification destination]                                   | ""CELLULAR COMMUNICATION chaperone activity     |
| CA0701 | 1.0 | 1.1 | 1.1 | 0.9 | 1.0 | 0.9 | IPF10397     | 3710871..3 unknown function                                    |                       | 10397 IPF10397   | No significant S.c. match                                                         |                                                 |
| CA0702 | 1.1 | 1.0 | 1.0 | 1.0 | 1.0 | 1.0 | IPF11812     | 3712258..3 unknown function                                    | orf19.1043!           | 11812 IPF11812   | CELLULAR TRANSPORT AND TRANSPORT MECHANISMS CELL FATE                             | molecular_function unknown                      |
| CA0703 | 0.9 | 0.9 | 1.0 | 1.0 | 0.9 | 1.0 | IPF11807     | complemer unknown function                                     | orf19.2914            | 11807 IPF11807   | No significant S.c. match                                                         |                                                 |
| CA0704 | 1.0 | 1.0 | 1.0 | 0.9 | 1.0 | 1.0 | IPF11806     | 3716310..3 similar to Saccharomyces cerevisiae                 | orf19.2915            | 11806 IPF11806   | PROTEIN FATE [folding modification destination]                                   | hydrolase activity                              |
| CA0705 | 1.1 | 1.0 | 1.0 | 0.9 | 1.0 | 1.0 | IPF11804     | 3718709..3 unknown function                                    | orf19.1043:           | 11804 IPF11804   | No significant S.c. match                                                         |                                                 |
| CA0706 | 1.2 | 1.2 | 0.9 | 1.3 | 1.0 | 1.3 | IPF7715      | 3720359..3 unknown function                                    | orf19.8300            | 7715 IPF7715     | CELL FATE                                                                         |                                                 |
| CA0707 | 1.0 | 0.9 | 1.0 | 1.0 | 0.9 | 1.0 | IPF7711      | complemer related to Neurospora crassa AP-1orf19.8298          |                       | 7711 IPF7711     | No significant S.c. match                                                         |                                                 |
| CA0709 | 1.0 | 0.9 | 1.0 | 1.0 | 1.0 | 1.0 | ZORRO2A.3F   | complemer Reverse transcriptase, 3-prime end                   | orf19.3387            | 3477 CaZorro2a   | CELL CYCLE AND DNA PROCESSING                                                     |                                                 |
| CA0711 | 1.0 | 1.0 | 1.0 | 0.9 | 1.0 | 1.0 | VMA5         | complemer H+-ATPase V1 domain 42 KD subunit                    | orf19.9712            | 13718 CaVMA5     | PROTEIN FATE [folding modification destination]                                   | ""CELLULAR TRANSPORT transporter activity       |
| CA0712 | 1.0 | 1.0 | 1.0 | 1.0 | 1.1 | 1.0 | IPF13717     | 3739000..3 unknown function                                    | orf19.2167            | 13717 IPF13717   | UNCLASSIFIED PROTEINS                                                             | molecular_function unknown                      |
| CA0713 | 0.9 | 0.9 | 1.0 | 1.0 | 1.0 | 1.0 | IFJ2         | complemer Unknown function                                     | orf19.2168            | 13715 CaIFJ2     | UNCLASSIFIED PROTEINS                                                             | molecular_function unknown                      |
| CA0714 | 1.0 | 1.1 | 1.1 | 1.0 | 1.0 | 1.0 | IPF9480      | 3748514..3 unknown function                                    | hypotheticaorf19.3394 | 9480 IPF9480     | UNCLASSIFIED PROTEINS                                                             |                                                 |
| CA0715 | 0.9 | 1.0 | 1.0 | 1.0 | 1.0 | 1.0 | DBP9         | complemer dead box helicase dead box homology                  | orf19.3393            | 9477 CaDBP9      | CLASSIFICATION NOT YET CLEAR-CUT                                                  | RNA binding,helicase activity                   |
| CA0716 | 0.9 | 1.0 | 1.0 | 1.1 | 1.0 | 1.0 | DOG2         | complemer 2-deoxyglucose-6-phosphate putative 2-oxo            | orf19.3392            | 9474 CaDOG2      | Phosphate metabolism C-compound and carbohydrate metabolism                       | hydrolase activity                              |
| CA0717 | 1.0 | 1.0 | 1.0 | 1.0 | 1.0 | 1.0 | IPF9785      | 3755079..3 unknown function                                    | orf19.3453            | 9785 IPF9785     | CELL FATE PROTEIN ACTIVITY REGULATION                                             |                                                 |
| CA0718 | 0.9 | 1.0 | 1.0 | 1.0 | 0.9 | 1.1 | IPF9782      | complemer unknown function                                     | orf19.3455            | 9782 IPF9782     | TRANSCRIPTION                                                                     | transporter activity                            |
| CA0719 | 1.0 | 1.0 | 1.0 | 1.0 | 1.0 | 1.0 | IPF9779.5    | 3759945..3 serine/threonine protein kinase, 5-oxo              | orf19.3456            | 9779 IPF9779.5   | CELL CYCLE AND DNA PROCESSING CELL FATE                                           |                                                 |
| CA0720 | 1.0 | 1.0 | 1.0 | 1.0 | 0.9 | 1.0 | IPF17932     | complemer unknown function                                     | orf19.3457            | 17933 IPF17932   | UNCLASSIFIED PROTEINS                                                             | DNA binding                                     |
| CA0721 | 1.2 | 1.1 | 0.9 | 0.9 | 1.0 | 0.9 | IPF10429     | 3766761..3 unknown function                                    | orf19.1040!           | 10429 IPF10429   | UNCLASSIFIED PROTEINS                                                             | molecular_function unknown                      |
| CA0722 | 1.0 | 1.0 | 1.0 | 1.0 | 1.0 | 1.0 | ERK1         | complemer mitogen-activated protein kinase                     | orf19.1040:           | 14791 CaERK1     | REGULATION OF/INTERACTION WITH CELLULAR ENVIRONMENT C                             | protein kinase activity,signal transduction     |
| CA0723 | 1.0 | 1.0 | 0.9 | 0.9 | 1.0 | 1.0 | PRI2         | complemer DNA-directed DNA polymerase alpha                    | orf19.2885            | 14788 CaPRI2     | CELL CYCLE AND DNA PROCESSING SUBCELLULAR LOCALISATION                            | nucleotidyltransferase activity                 |
| CA0724 | 1.1 | 1.0 | 1.0 | 1.0 | 1.1 | 1.0 | IPF13398     | complemer protein kinase (by homology)                         | orf19.7708            | 13398 IPF13398   | UNCLASSIFIED PROTEINS                                                             |                                                 |
| CA0725 | 1.0 | 1.0 | 0.9 | 0.8 | 0.9 | 0.8 | IPF20063     | 3788443..3 unknown function                                    | orf19.1749            | 20063 IPF20063   | No significant S.c. match                                                         |                                                 |
| CA0727 | 1.0 | 1.1 | 1.0 | 0.9 | 1.0 | 1.0 | IPF7347      | complemer unknown function                                     | orf19.1121:           | 7347 IPF7347     | UNCLASSIFIED PROTEINS                                                             | molecular_function unknown                      |
| CA0728 | 1.0 | 1.0 | 1.1 | 1.0 | 1.2 | 1.0 | IPF7345      | 3795607..3 unknown function                                    | orf19.1121:           | 7345 IPF7345     | UNCLASSIFIED PROTEINS                                                             | molecular_function unknown                      |
| CA0729 | 1.1 | 1.0 | 1.0 | 1.0 | 1.0 | 0.9 | IPF7338      | 3800930..3 unknown function                                    | orf19.1121!           | 7338 IPF7338     | No significant S.c. match                                                         |                                                 |
| CA0730 | 1.1 | 1.0 | 1.0 | 1.0 | 1.1 | 1.0 | IPF7334      | 3804299..3 unknown function                                    | orf19.1120!           | 7334 IPF7334     | UNCLASSIFIED PROTEINS                                                             | molecular_function unknown                      |
| CA0731 | 1.1 | 1.2 | 0.9 | 1.1 | 1.0 | 1.1 | IPF7333      | complemer unknown function                                     | orf19.1120!           | 7333 IPF7333     | CLASSIFICATION NOT YET CLEAR-CUT                                                  | DNA binding,transcription regulator             |
| CA0732 | 1.0 | 1.0 | 1.0 | 1.0 | 1.0 | 1.0 | IPF9000      | complemer unknown function                                     | orf19.4636            | 9000 IPF9000     | No significant S.c. match                                                         |                                                 |
| CA0733 | 1.1 | 1.0 | 1.0 | 1.0 | 1.0 | 1.0 | NIP1         | 3809260..3 translation initiation factor subunit               | orf19.4635            | 8998 CaNIP1      | PROTEIN SYNTHESIS SUBCELLULAR LOCALISATION                                        | translation regulator activity                  |
| CA0734 | 1.0 | 1.0 | 1.0 | 0.9 | 1.0 | 1.0 | IPF8996      | 3812285..3 unknown function                                    | orf19.4634            | 8996 IPF8996     | UNCLASSIFIED PROTEINS                                                             | molecular_function unknown                      |
| CA0735 | 1.0 | 1.0 | 1.1 | 1.0 | 1.1 | 1.0 | IPF8995      | 3813827..3 unknown function                                    | orf19.4633            | 8995 IPF8995     | CLASSIFICATION NOT YET CLEAR-CUT                                                  | oxidoreductase activity                         |
| CA0736 | 1.1 | 1.0 | 1.0 | 1.0 | 0.9 | 1.1 | RPL20B       | complemer ribosomal protein (by homology)                      | orf19.4632            | 8994 CaRPL20B    | PROTEIN SYNTHESIS SUBCELLULAR LOCALISATION                                        | structural molecule activity                    |
| CA0737 | 1.0 | 1.0 | 1.0 | 1.0 | 1.0 | 1.1 | SEC16.53F.EC | 3817616..3 Multidomain vesicle coat protein, internal fragment |                       | 19510 CaSEC16.!  | C-compound and carbohydrate metabolism SUBCELLULAR LOCALISATION                   |                                                 |
| CA0738 | 0.9 | 1.0 | 0.9 | 1.0 | 1.1 | 1.0 | SEC16.3F     | 3820133..3 Multidomain vesicle coat protein, 3-oxo             | orf19.1181!           | 14620 CaSEC16.!  | No significant S.c. match                                                         |                                                 |
| CA0739 | 1.0 | 1.0 | 1.0 | 0.9 | 1.0 | 1.0 | IPF18885     | complemer similar to Saccharomyces cerevisiae                  | orf19.1181!           | 18885 IPF18885   | CLASSIFICATION NOT YET CLEAR-CUT                                                  | hydrolase activity                              |
| CA0740 | 1.0 | 0.9 | 0.9 | 0.9 | 1.0 | 1.0 | IPF3262.3    | 3832587..3 unknown function, 3-prime end                       |                       | 3262 IPF3262.3   | PROTEIN FATE [folding modification destination]                                   | ""SUBCELLULAR LOCALISATION chaperone activity   |
| CA0741 | 1.1 | 1.0 | 1.0 | 1.1 | 1.0 | 1.0 | IPF3261      | 3833641..3 unknown function                                    | orf19.3141            | 3261 IPF3261     | SUBCELLULAR LOCALISATION                                                          | molecular_function unknown                      |
| CA0742 | 0.9 | 0.9 | 1.0 | 1.0 | 1.0 | 1.0 | IPF3259      | complemer unknown function                                     | orf19.3142            | 3259 IPF3259     | No significant S.c. match                                                         |                                                 |
| CA0743 | 1.0 | 1.0 | 1.0 | 1.0 | 1.0 | 1.0 | RNA14.3EOC   | 3839805..3 component of pre-mRNA 3'-end processing factor      |                       | 14917 CaRNA14.!  | TRANSCRIPTION SUBCELLULAR LOCALISATION                                            | RNA binding                                     |
| CA0744 | 0.9 | 0.9 | 1.0 | 1.0 | 1.0 | 1.1 | IPF14919     | 3841658..3 unknown function                                    | orf19.9105            | 14919 IPF14919   | No significant S.c. match                                                         |                                                 |
| CA0745 | 0.9 | 1.0 | 1.0 | 1.0 | 0.9 | 1.0 | MTF1         | complemer RNA polymerase specific factor, major                | orf19.9104            | 14920 CaMTF1     | CELL CYCLE AND DNA PROCESSING TRANSCRIPTION SUBCELLULAR LOCALISATION              | transcription regulator activity                |
| CA0746 | 1.0 | 0.9 | 1.1 | 1.0 | 1.0 | 0.9 | IPF14921     | 3845097..3 unknown function                                    | orf19.1527            | 14921 IPF14921   | No significant S.c. match                                                         |                                                 |
| CA0747 | 1.1 | 1.1 | 1.0 | 1.0 | 1.1 | 1.0 | SNF2         | complemer component of SWI/SNF global transcription factor     | orf19.9102            | 15319 CaSNF2     | C-compound and carbohydrate metabolism TRANSCRIPTION CELL FATE                    | transcription regulator activity                |
| CA0748 | 1.0 | 1.2 | 1.1 | 1.1 | 1.1 | 0.9 | TFS1         | complemer cdc25-dependent nutrient- and amino acid             | orf19.1974            | 6281 CaTFS1      | CELL CYCLE AND DNA PROCESSING REGULATION OF/INTERACTION WITH CELLULAR ENVIRONMENT | enzyme regulator activity                       |
| CA0749 | 1.1 | 1.0 | 0.9 | 0.9 | 0.9 | 1.0 | HAP5         | complemer CCAAT-binding factor subunit (by homology)           | orf19.1973            | 6283 CaHAP5      | TRANSCRIPTION SUBCELLULAR LOCALISATION                                            | transcription regulator activity                |
| CA0750 | 1.0 | 1.0 | 1.0 | 1.0 | 1.1 | 1.1 | IPF6284      | complemer unknown function                                     | orf19.1972            | 6284 IPF6284     | UNCLASSIFIED PROTEINS                                                             | molecular_function unknown                      |
| CA0751 | 1.0 | 0.9 | 0.9 | 1.0 | 0.9 | 1.0 | IPF6286      | 3858216..3 unknown function                                    | orf19.1971            | 6286 IPF6286     | TRANSCRIPTION                                                                     |                                                 |
| CA0752 | 1.1 | 1.1 | 1.0 | 1.0 | 1.0 | 1.0 | MNN22        | 3864361..3 Golgi alpha-1,2-mannosyltransferase                 | orf19.1128:           | 10363 CaMNN22    | CELL FATE                                                                         |                                                 |

|        |     |     |     |     |     |     |               |                                                               |                     |       |            |                                                                                                                        |                                                                      |
|--------|-----|-----|-----|-----|-----|-----|---------------|---------------------------------------------------------------|---------------------|-------|------------|------------------------------------------------------------------------------------------------------------------------|----------------------------------------------------------------------|
| CA0753 | 1.0 | 1.0 | 1.0 | 1.0 | 0.9 | 1.0 | IPF10359      | complemer unknown function                                    | orf19.1128          | 10359 | IPF10359   | UNCLASSIFIED PROTEINS                                                                                                  | molecular_function unknown                                           |
| CA0754 | 1.1 | 1.0 | 1.0 | 1.0 | 0.9 | 1.0 | IPF15880      | complemer unknown function                                    | orf19.3486          | 15880 | IPF15880   | No significant S.c. match                                                                                              |                                                                      |
| CA0755 | 0.9 | 0.9 | 1.0 | 1.0 | 1.1 | 1.1 | IPF14861      | 3877364..3 unknown function                                   | orf19.3487          | 14861 | IPF14861   | No significant S.c. match                                                                                              |                                                                      |
| CA0756 | 1.0 | 1.1 | 1.0 | 1.0 | 1.0 | 1.0 | IPF14859      | 3878814..3 acyl-coenzyme-A dehydrogenase                      | orf19.3488          | 14859 | IPF14859   | No significant S.c. match                                                                                              |                                                                      |
| CA0757 | 1.1 | 1.0 | 1.0 | 1.0 | 0.9 | 0.9 | GAP7.3EOC     | 3903803..3 general amino-acid permease, 3-prime end           |                     | 11170 | CaGAP7.3   | Amino acid metabolism                                                                                                  | CELLULAR TRANSPORT AND TRANSPORT MECHANISMS SUBCELLULAR LOCALISATION |
| CA0758 | 1.0 | 1.1 | 1.0 | 1.0 | 1.0 | 1.0 | PAP11         | complemer poly(A) polymerase by unknown                       | [orf19.3197         | 19882 | CaPAP11    | TRANSCRIPTION SUBCELLULAR LOCALISATION                                                                                 | nucleotidyltransferase activity                                      |
| CA0759 | 1.1 | 1.0 | 1.0 | 1.0 | 1.1 | 1.1 | IPF11167      | 3907343..3 unknown function                                   | unknown [orf19.3198 | 11167 | IPF11167   | Lipid fatty-acid and isoprenoid metabolism                                                                             |                                                                      |
| CA0760 | 1.0 | 1.0 | 1.0 | 1.0 | 1.0 | 1.1 | IPF11161.3    | 3913153..3 unknown function, 3-prime end                      | orf19.3201          | 11161 | IPF11161.3 | CELL FATE SUBCELLULAR LOCALISATION UNCLASSIFIED PROTEIN                                                                | transcription regulator activity                                     |
| CA0761 | 1.0 | 1.0 | 0.9 | 0.9 | 0.9 | 1.0 | IPF8267       | complemer P-type ATPase                                       | orf19.9146          | 8267  | IPF8267    | TRANSPORT FACILITATION                                                                                                 | molecular_function unknown                                           |
| CA0762 | 1.0 | 1.0 | 1.2 | 1.0 | 1.0 | 0.9 | TAF67         | 3920176..3 TFIID subunit (by homology)                        | orf19.9147          | 15686 | CaTAF67    | TRANSCRIPTION SUBCELLULAR LOCALISATION                                                                                 | transcription regulator activity                                     |
| CA0763 | 1.0 | 1.0 | 0.9 | 1.0 | 1.1 | 1.1 | RPL11         | complemer 60S ribosomal protein (by homology)                 | orf19.2232          | 9044  | CaRPL11    | PROTEIN SYNTHESIS SUBCELLULAR LOCALISATION                                                                             | structural molecule activity                                         |
| CA0764 | 1.0 | 0.9 | 1.1 | 0.9 | 1.1 | 1.0 | PRE2          | complemer 20S proteasome subunit (beta5)                      | orf19.2233          | 9042  | CaPRE2     | CELL CYCLE AND DNA PROCESSING ""PROTEIN FATE [folding modification]                                                    | peptidase activity                                                   |
| CA0765 | 1.0 | 1.0 | 0.9 | 1.0 | 1.0 | 1.0 | IPF9040.3EOC  | complemer similar to Saccharomyces cerevisiae                 | orf19.9778          | 9040  | IPF9040.3  | TRANSCRIPTION SUBCELLULAR LOCALISATION                                                                                 | DNA binding,transcription regulator activity                         |
| CA0766 | 1.2 | 1.2 | 1.0 | 1.1 | 1.1 | 1.2 | IPF15335      | 3933411..3 unknown function                                   | orf19.1243          | 15335 | IPF15335   | No significant S.c. match                                                                                              |                                                                      |
| CA0767 | 1.1 | 1.1 | 1.0 | 0.9 | 0.9 | 1.0 | KEM1.3        | 3936597..3 multifunctional nuclease, 3-prime end              | orf19.1243          | 13214 | CaKEM1.3   | Nucleotide metabolism                                                                                                  | CELL CYCLE AND DNA PROCESSING TRANS DNA binding                      |
| CA0768 | 1.0 | 1.1 | 1.0 | 1.0 | 1.0 | 0.8 | COX19         | complemer Protein required for cytochrome c                   | orf19.1243          | 13215 | CaCOX19    | No significant S.c. match                                                                                              | transporter activity                                                 |
| CA0769 | 1.1 | 1.0 | 1.1 | 1.5 | 1.2 | 1.2 | IPF10967      | complemer unknown function                                    | orf19.2826          | 10967 | IPF10967   | No significant S.c. match                                                                                              |                                                                      |
| CA0770 | 0.9 | 0.9 | 1.0 | 0.9 | 0.9 | 1.0 | IPF10963      | 3951799..3 similar to Saccharomyces cerevisiae                | orf19.1034          | 10963 | IPF10963   | SUBCELLULAR LOCALISATION                                                                                               | structural molecule activity                                         |
| CA0771 | 0.9 | 0.9 | 1.0 | 1.0 | 1.0 | 1.0 | IPF11977      | complemer aspartic proteinase (by homology)                   | orf19.853           | 11977 | IPF11977   | PROTEIN FATE [folding modification destination] ""SUBCELLULAR LOCALISATION                                             |                                                                      |
| CA0772 | 1.0 | 0.9 | 1.0 | 1.0 | 1.0 | 0.9 | UGA11.EXON    | complemer 4-aminobutyrate aminotransferase, exon 2 (by        |                     | 11976 | CaUGA11    | Amino acid metabolism                                                                                                  | Nitrogen and sulphur metabolism                                      |
| CA0773 | 1.0 | 1.0 | 1.1 | 1.0 | 0.9 | 1.0 | UGA11.EXON    | complemer 4-aminobutyrate aminotransferase                    | orf19.854           | 11975 | CaUGA11    | Amino acid metabolism                                                                                                  | Nitrogen and sulphur metabolism                                      |
| CA0774 | 1.0 | 1.1 | 1.0 | 1.0 | 1.0 | 1.0 | IPF11974      | complemer unknown function                                    | orf19.855           | 11974 | IPF11974   | No significant S.c. match                                                                                              |                                                                      |
| CA0775 | 0.9 | 0.8 | 1.1 | 1.0 | 0.9 | 1.0 | IFK2          | complemer probable monooxygenase (by homology)                | orf19.856           | 11973 | CaIFK2     | No significant S.c. match                                                                                              |                                                                      |
| CA0777 | 0.9 | 0.9 | 1.1 | 1.0 | 1.1 | 1.0 | IPF11777      | 3968540..3 unknown function                                   | orf19.4778          | 11777 | IPF11777   | Amino acid metabolism                                                                                                  | TRANSCRIPTION SUBCELLULAR LOCALISATION UNCLASSIFIED PROTEINS         |
| CA0778 | 1.0 | 0.9 | 1.0 | 0.9 | 1.0 | 1.1 | IPF12884      | complemer unknown function                                    | orf19.4779          | 12884 | IPF12884   | CELL RESCUE DEFENSE AND VIRULENCE ""TRANSPORT FACILITATION                                                             | molecular_function unknown                                           |
| CA0779 | 1.0 | 1.0 | 1.1 | 1.0 | 1.0 | 1.0 | IPF20065      | complemer similar to Saccharomyces cerevisiae                 | orf19.3491          | 20065 | IPF20065   | CELL CYCLE AND DNA PROCESSING SUBCELLULAR LOCALISATION                                                                 | DNA binding                                                          |
| CA0780 | 1.1 | 1.0 | 1.0 | 1.0 | 0.9 | 1.0 | CIRT1A        | 3982286..3 transposase                                        | orf19.3492          | 3762  | CaCirt1a   | No significant S.c. match                                                                                              |                                                                      |
| CA0781 | 1.0 | 1.1 | 1.1 | 0.9 | 1.0 | 1.0 | CAR1.3EOC     | 3985861..3 arginase, 3-prime end (by homology)                | orf19.1141          | 16256 | CaCAR1.3   | Amino acid metabolism                                                                                                  | Nitrogen and sulphur metabolism                                      |
| CA0782 | 1.3 | 1.8 | 1.2 | 1.5 | 1.1 | 1.2 | IPF16253      | 3987286..3 unknown function                                   | orf19.1141          | 16253 | IPF16253   | No significant S.c. match                                                                                              |                                                                      |
| CA0783 | 1.1 | 1.0 | 1.1 | 1.0 | 1.1 | 0.8 | ACR1          | 3990073..3 Succinate-fumarate transporter (by homology)       | orf19.3931          | 14601 | CaACR1     | C-compound and carbohydrate metabolism                                                                                 | CELLULAR TRANSPORT AND TRANSPORT MECHANISMS SUBCELLULAR LOCALISATION |
| CA0784 | 1.0 | 1.1 | 1.0 | 1.0 | 1.1 | 1.0 | YUH1.3        | 3991413..3 Putative ubiquitin carboxyl-terminal hydrolase     | orf19.3930          | 14602 | CaYUH1.3   | PROTEIN FATE [folding modification destination] ""SUBCELLULAR LOCALISATION                                             |                                                                      |
| CA0785 | 1.1 | 1.0 | 0.9 | 0.9 | 0.9 | 1.0 | IPF14603      | complemer unknown function                                    | orf19.1141          | 14603 | IPF14603   | UNCLASSIFIED PROTEINS                                                                                                  | molecular_function unknown                                           |
| CA0786 | 0.9 | 1.0 | 1.0 | 1.1 | 1.0 | 1.0 | IPF7473       | 3996026..3 unknown function                                   | orf19.2446          | 7473  | IPF7473    | UNCLASSIFIED PROTEINS                                                                                                  | molecular_function unknown                                           |
| CA0787 | 1.0 | 1.0 | 0.9 | 1.0 | 0.9 | 1.0 | IPF7472       | complemer unknown function                                    | orf19.2447          | 7472  | IPF7472    | UNCLASSIFIED PROTEINS                                                                                                  | transferase activity                                                 |
| CA0788 | 1.0 | 1.0 | 1.0 | 1.0 | 1.0 | 0.9 | IPF14107      | complemer unknown function                                    | orf19.9985          | 14107 | IPF14107   | No significant S.c. match                                                                                              |                                                                      |
| CA0789 | 1.0 | 0.9 | 0.9 | 1.0 | 0.9 | 1.0 | ESP1          | complemer Required for sister chromatid separation            | orf19.3356          | 14196 | CaESP1     | CELL CYCLE AND DNA PROCESSING SUBCELLULAR LOCALISATION                                                                 | peptidase activity                                                   |
| CA0790 | 1.0 | 1.1 | 1.0 | 1.0 | 1.0 | 0.8 | IPF14193      | complemer unknown function                                    | orf19.3357          | 14193 | IPF14193   | UNCLASSIFIED PROTEINS                                                                                                  | molecular_function unknown                                           |
| CA0791 | 1.0 | 0.9 | 1.0 | 1.0 | 1.0 | 1.0 | LSC1          | complemer succinate-CoA ligase / synthetase                   | orf19.3358          | 14191 | CaLSC1     | C-compound and carbohydrate metabolism                                                                                 | ENERGY                                                               |
| CA0792 | 1.0 | 1.0 | 1.0 | 0.9 | 1.0 | 0.9 | DIT2          | 4015047..4 putative cytochrome P450                           | orf19.554           | 20066 | CaDIT2     | CELL RESCUE DEFENSE AND VIRULENCE ""CELL FATE CONTROL OF CELLULAR ORGANIZATION                                         |                                                                      |
| CA0793 | 0.9 | 0.9 | 1.0 | 1.0 | 1.1 | 1.1 | IPF16273      | 4016707..4 similar to Saccharomyces cerevisiae                | orf19.553           | 16273 | IPF16273   | CELL RESCUE DEFENSE AND VIRULENCE ""TRANSPORT FACILITATION                                                             | transporter activity                                                 |
| CA0794 | 1.0 | 1.0 | 1.1 | 1.0 | 1.0 | 1.0 | IPF15639      | 4018478..4 unknown function                                   | orf19.552           | 15639 | IPF15639   | TRANSCRIPTION FACILITATION                                                                                             | molecular_function unknown                                           |
| CA0795 | 1.0 | 0.9 | 1.0 | 1.0 | 1.0 | 0.9 | IPF15641      | complemer unknown function                                    | orf19.8186          | 15641 | IPF15641   | TRANSCRIPTION SUBCELLULAR LOCALISATION                                                                                 |                                                                      |
| CA0796 | 1.1 | 0.9 | 0.9 | 1.0 | 1.0 | 1.1 | ALR1          | 4025800..4 divalent cation transporter                        | orf19.9175          | 13562 | CaALR1     | CELLULAR TRANSPORT AND TRANSPORT MECHANISMS ""CELL RESCUE DEFENSE AND VIRULENCE                                        | transporter activity                                                 |
| CA0797 | 0.9 | 1.0 | 1.0 | 1.0 | 1.0 | 1.0 | IPF13564      | 4029562..4 putative arylsulfatase (by homology)               | orf19.1608          | 13564 | IPF13564   | No significant S.c. match                                                                                              |                                                                      |
| CA0798 | 1.0 | 1.0 | 1.0 | 1.0 | 1.0 | 1.1 | IPF13565      | complemer unknown function                                    | orf19.9177          | 13565 | IPF13565   | UNCLASSIFIED PROTEINS                                                                                                  | molecular_function unknown                                           |
| CA0799 | 0.9 | 1.0 | 1.1 | 1.1 | 1.0 | 1.0 | IPF14825      | complemer unknown function                                    | orf19.9178          | 13567 | IPF14825   | No significant S.c. match                                                                                              |                                                                      |
| CA0800 | 0.9 | 1.1 | 1.0 | 1.1 | 1.0 | 0.9 | IPF14064      | 4037327..4 similar to Saccharomyces cerevisiae                | orf19.3494          | 14064 | IPF14064   | SUBCELLULAR LOCALISATION                                                                                               | protein binding                                                      |
| CA0801 | 1.0 | 1.1 | 1.0 | 1.0 | 1.0 | 1.2 | CHC1          | complemer clathrin heavy chain (by homology)                  | orf19.3496          | 14063 | CaCHC1     | PROTEIN FATE [folding modification destination] ""CELLULAR TRANSPORT AND TRANSPORT MECHANISMS SUBCELLULAR LOCALISATION | structural molecule activity                                         |
| CA0802 | 1.0 | 1.1 | 1.0 | 1.1 | 1.1 | 1.0 | IPF14060      | complemer unknown function                                    | orf19.3498          | 14060 | IPF14060   | UNCLASSIFIED PROTEINS                                                                                                  |                                                                      |
| CA0803 | 1.0 | 1.1 | 1.0 | 1.0 | 1.0 | 1.0 | IFL4          | 4047742..4 unknown function                                   | orf19.3512          | 12574 | CaIFL4     | CELL RESCUE DEFENSE AND VIRULENCE ""SUBCELLULAR LOCALISATION                                                           |                                                                      |
| CA0804 | 1.1 | 0.9 | 1.0 | 1.0 | 1.1 | 1.0 | BNA1          | 4049307..4 3-hydroxyanthranilic acid dioxygenase              | orf19.3515          | 12570 | CaBNA1     | Amino acid metabolism                                                                                                  | ""Metabolism of vitamins cofactors and prosthetic factors            |
| CA0805 | 0.9 | 1.0 | 0.9 | 1.1 | 1.0 | 1.0 | IPF12568      | complemer unknown function                                    | orf19.3516          | 12568 | IPF12568   | No significant S.c. match                                                                                              |                                                                      |
| CA0806 | 1.1 | 0.9 | 1.1 | 0.9 | 1.0 | 1.0 | IPF12567      | 4050879..4 unknown function                                   | orf19.3517          | 12567 | IPF12567   | UNCLASSIFIED PROTEINS                                                                                                  | molecular_function unknown                                           |
| CA0807 | 0.9 | 1.0 | 1.0 | 0.9 | 1.0 | 1.0 | IPF12564      | 4053164..4 ADP/ATP carrier proteins (by homology)             | orf19.3518          | 12564 | IPF12564   | CELLULAR TRANSPORT AND TRANSPORT MECHANISMS SUBCELLULAR LOCALISATION                                                   | transporter activity                                                 |
| CA0808 | 1.0 | 0.9 | 1.0 | 1.0 | 0.9 | 1.0 | SUA71         | 4054757..4 TFIIB subunit (transcription initiation)           | orf19.3519          | 12563 | CaSUA71    | TRANSCRIPTION SUBCELLULAR LOCALISATION                                                                                 |                                                                      |
| CA0810 | 1.0 | 1.0 | 1.0 | 1.0 | 0.9 | 1.1 | RRN3          | 4062688..4 RNA polymerase I specific transcription factor     | orf19.1923          | 19708 | CaRRN3     | TRANSCRIPTION SUBCELLULAR LOCALISATION                                                                                 | transcription regulator activity                                     |
| CA0811 | 0.9 | 1.0 | 1.0 | 1.0 | 1.0 | 1.0 | IPF17625      | complemer putative cell wall protein of the PIR               | orf19.1920          | 17625 | IPF17625   | CELL RESCUE DEFENSE AND VIRULENCE ""SUBCELLULAR LOCALISATION                                                           |                                                                      |
| CA0812 | 1.0 | 1.0 | 1.1 | 0.9 | 1.0 | 0.8 | IPF3348       | complemer unknown function                                    | orf19.1917          | 16243 | IPF3348    | UNCLASSIFIED PROTEINS                                                                                                  |                                                                      |
| CA0813 | 1.1 | 1.1 | 1.1 | 1.0 | 1.0 | 0.9 | MPP10         | complemer component of the U3 small nuclear ribonucleoprotein | orf19.1915          | 16234 | CaMPP10    | TRANSCRIPTION SUBCELLULAR LOCALISATION                                                                                 | molecular_function unknown                                           |
| CA0814 | 1.0 | 1.1 | 1.1 | 1.0 | 1.0 | 0.9 | IPF16233      | complemer unknown function                                    | orf19.1914          | 16233 | IPF16233   | No significant S.c. match                                                                                              |                                                                      |
| CA0815 | 0.9 | 0.9 | 0.9 | 1.0 | 1.1 | 1.0 | IPF16231      | 4069461..4 unknown function                                   | orf19.1913          | 16231 | IPF16231   | No significant S.c. match                                                                                              |                                                                      |
| CA0817 | 1.0 | 1.0 | 0.7 | 0.8 | 0.9 | 0.9 | IPF6339       | 4087533..4 unknown function                                   | orf19.1023          | 6399  | IPF6339    | No significant S.c. match                                                                                              |                                                                      |
| CA0819 | 1.0 | 1.0 | 1.0 | 1.0 | 1.0 | 1.1 | VPS1          | complemer member of the dynamin family of GTPases             | orf19.1949          | 19610 | CaVPS1     | PROTEIN FATE [folding modification destination] ""SUBCELLULAR LOCALISATION                                             | hydrolase activity                                                   |
| CA0820 | 0.9 | 1.0 | 1.0 | 0.9 | 0.9 | 1.0 | IPF12138      | complemer unknown function                                    | orf19.1950          | 18864 | IPF12138   | UNCLASSIFIED PROTEINS                                                                                                  | hydrolase activity                                                   |
| CA0821 | 1.0 | 0.8 | 1.1 | 1.0 | 1.0 | 1.0 | IPF16795      | 4104298..4 glyceraldehyde-3-phosphate dehydrogenase           | orf19.2989          | 16795 | IPF16795   | C-compound and carbohydrate metabolism                                                                                 | oxidoreductase activity                                              |
| CA0822 | 1.0 | 1.0 | 1.0 | 1.1 | 1.1 | 1.0 | EXG1          | complemer glucan 1,3-beta-glucosyltransferase                 | orf19.2990          | 14073 | CaEXG1     | C-compound and carbohydrate metabolism                                                                                 | CELL FATE SUBCELLULAR LOCALISATION                                   |
| CA0823 | 1.0 | 1.0 | 1.0 | 1.0 | 0.9 | 1.0 | IPF11987.3EOC | 4112204..4 unknown function, 3-prime end                      | orf19.692           | 11987 | IPF11987.3 | No significant S.c. match                                                                                              |                                                                      |
| CA0824 | 1.1 | 1.0 | 1.1 | 1.1 | 1.1 | 1.1 | GPD2          | 4114960..4 Glycerol 3-phosphate dehydrogenase                 | orf19.691           | 11982 | CaGPD2     | C-compound and carbohydrate metabolism                                                                                 | ""CELL RESCUE DEFENSE AND VIRULENCE ""REGULATION                     |
| CA0825 | 1.0 | 0.9 | 1.0 | 1.1 | 1.1 | 1.0 | PLB2          | complemer phospholipase B                                     | orf19.8309          | 11981 | CaPLB2     | Lipid fatty-acid and isoprenoid metabolism                                                                             | ""SUBCELLULAR LOCALISATION Other virulence attributes                |
| CA0826 | 1.0 | 1.1 | 1.1 | 1.0 | 1.0 | 0.9 | IPF19885      | 4118749..4 unknown function                                   | orf19.8308          | 19885 | IPF19885   | No significant S.c. match                                                                                              |                                                                      |
| CA0827 | 1.0 | 1.0 | 1.0 | 1.0 | 1.0 | 0.9 | IPF18859      | 4122110..4 unknown function                                   | orf19.7884          | 18859 | IPF18859   | UNCLASSIFIED PROTEINS                                                                                                  | molecular_function unknown                                           |
| CA0828 | 1.0 | 1.0 | 1.5 | 1.9 | 1.3 | 1.4 | IPF17186      | 4124295..4 unknown function                                   | orf19.7882          | 17186 | IPF17186   | UNCLASSIFIED PROTEINS                                                                                                  | molecular_function unknown                                           |

|        |     |      |     |     |     |     |              |                                                            |                  |                                                                                              |
|--------|-----|------|-----|-----|-----|-----|--------------|------------------------------------------------------------|------------------|----------------------------------------------------------------------------------------------|
| CA0829 | 1.0 | 1.0  | 1.0 | 0.9 | 1.0 | 1.0 | SLC1         | 4125941..4 fatty acyltransferase (by homology orf19.250    | 19886 CaSLC1     | Lipid fatty-acid and isoprenoid metabolism ""SUBCELLULAR LOCALISA' transferase activity      |
| CA0830 | 1.0 | 1.0  | 1.0 | 0.9 | 1.0 | 1.0 | APL5         | complemer AP-3 complex subunit, gamma-ad:orf19.7879        | 14699 CaAPL5     | CELLULAR TRANSPORT AND TRANSPORT MECHANISMS molecular_function unknown                       |
| CA0831 | 1.0 | 1.0  | 1.1 | 1.0 | 1.1 | 1.0 | IPF10493.5EC | 4130615..4 unknown function, 5-prime end orf19.7878        | 14701 IPF10493.5 | No significant S.c. match                                                                    |
| CA0832 | 1.0 | 1.0  | 1.0 | 1.1 | 1.1 | 1.1 | IPF14225     | complemer unknown function orf19.9244                      | 14225 IPF14225   | UNCLASSIFIED PROTEINS molecular_function unknown                                             |
| CA0833 | 0.9 | 1.0  | 0.9 | 1.1 | 1.0 | 1.0 | IPF12501     | 4136657..4 unknown function orf19.9245                     | 12501 IPF12501   | UNCLASSIFIED PROTEINS molecular_function unknown                                             |
| CA0834 | 1.0 | 1.0  | 1.0 | 1.0 | 1.1 | 1.1 | IPF12498.3F  | complemer unknown function, 3-prime end orf19.1677         | 12499 IPF12498.3 | No significant S.c. match                                                                    |
| CA0835 | 0.9 | 0.9  | 0.9 | 1.0 | 0.9 | 1.0 | IPF12498.53F | complemer unknown function, internal fragment              | 12498 IPF12498.5 | No significant S.c. match                                                                    |
| CA0836 | 1.0 | 1.1  | 1.1 | 1.0 | 1.0 | 1.0 | IPF12495.5F  | 4140843..4 unknown function, 5-prime end orf19.9248        | 12495 IPF12495.5 | No significant S.c. match                                                                    |
| CA0837 | 1.0 | 0.9  | 1.0 | 1.1 | 0.9 | 1.0 | IPF12495.3F  | 4141422..4 unknown function, 3-prime end                   | 12494 IPF12495.3 | No significant S.c. match                                                                    |
| CA0838 | 1.0 | 1.0  | 1.0 | 1.1 | 1.0 | 1.2 | TFP1         | complemer vacuolar ATPase subunit (by hom orf19.9249       | 12493 CaTFP1     | PROTEIN FATE [folding modification destination] ""CELLULAR TRANSP DNA binding                |
| CA0839 | 1.0 | 0.9  | 1.2 | 1.1 | 1.0 | 1.0 | IPF12492     | complemer unknown function                                 | 12492 IPF12492   | PROTEIN FATE [folding modification destination] ""SUBCELLULAR LOCALISATION                   |
| CA0840 | 0.9 | 1.0  | 1.1 | 1.3 | 1.1 | 1.3 | IFD1         | 4146777..4 Putative aryl-alcohol dehydrogenase orf19.8650  | 18856 CaIFD1     | C-compound and carbohydrate metabolism ENERGY                                                |
| CA0841 | 1.1 | 1.0  | 1.0 | 1.0 | 1.0 | 1.0 | IPF15638     | complemer unknown function orf19.8652                      | 15638 IPF15638   | No significant S.c. match                                                                    |
| CA0842 | 1.0 | 1.0  | 1.1 | 0.9 | 0.9 | 1.0 | IPF15633     | complemer similar to Saccharomyces cerevisi: orf19.1053    | 15633 IPF15633   | CELLULAR TRANSPORT AND TRANSPORT MECHANISMS SUBCELL molecular_function unknown               |
| CA0843 | 1.0 | 1.0  | 1.1 | 1.0 | 1.1 | 1.0 | IPF18853     | complemer unknown function orf19.8656                      | 18853 IPF18853   | UNCLASSIFIED PROTEINS molecular_function unknown                                             |
| CA0844 | 0.9 | 0.7  | 1.0 | 0.9 | 1.0 | 1.0 | CDC3         | complemer Cell division control protein orf19.8657         | 16098 CaCDC3     | CELL CYCLE AND DNA PROCESSING CELL FATE SUBCELLULAR LOCAL structural molecule activity       |
| CA0845 | 1.0 | 1.0  | 1.0 | 1.0 | 1.0 | 1.0 | IPF16314     | complemer unknown function orf19.7896                      | 16314 IPF16314   | No significant S.c. match                                                                    |
| CA0846 | 1.0 | 1.0  | 1.0 | 1.0 | 1.0 | 1.0 | SMC3         | complemer required for structural maintenance orf19.7895   | 12682 CaSMC3     | CELL CYCLE AND DNA PROCESSING CONTROL OF CELLULAR ORC hydrolase activity                     |
| CA0848 | 3.6 | 13.6 | 1.0 | 0.9 | 1.0 | 1.0 | ACS1         | 4172674..4 acetyl-coenzyme-A synthetase (by orf19.1743     | 15005 CaACS1     | C-compound and carbohydrate metabolism ENERGY CONTROL OF CE ligase activity                  |
| CA0849 | 1.0 | 1.0  | 1.0 | 1.0 | 1.0 | 1.0 | HEM4         | complemer uroporphyrinogen III syuoporphyr orf19.9311      | 15006 CaHEM4     | Metabolism of vitamins cofactors and prosthetic groups lyase activity                        |
| CA0850 | 1.0 | 1.0  | 1.0 | 1.0 | 0.9 | 0.9 | IPF16671     | 4177044..4 unknown function hypothetica orf19.9312         | 16671 IPF16671   | No significant S.c. match                                                                    |
| CA0851 | 1.1 | 1.1  | 1.0 | 1.0 | 1.0 | 1.0 | IPF16670     | 4177799..4 unknown function hypothetica orf19.9313         | 16670 IPF16670   | UNCLASSIFIED PROTEINS molecular_function unknown                                             |
| CA0852 | 1.0 | 1.1  | 0.9 | 0.9 | 1.0 | 1.0 | KIP2         | 4179505..4 Kinesin-related protein kinesin-like orf19.9315 | 10752 CaKIP2     | CELL CYCLE AND DNA PROCESSING CELLULAR TRANSPORT AND motor activity                          |
| CA0853 | 1.2 | 1.2  | 1.0 | 1.0 | 1.0 | 1.0 | IPF19640     | 4182073..4 unknown function orf19.9316                     | 19639 IPF19640   | No significant S.c. match                                                                    |
| CA0854 | 1.0 | 1.0  | 1.0 | 1.0 | 0.9 | 1.0 | IPF8854      | complemer similar to Saccharomyces cerevisi: orf19.4900    | 8854 IPF8854     | C-compound and carbohydrate metabolism ""PROTEIN FATE [folding m transferase activity        |
| CA0855 | 1.0 | 0.9  | 1.1 | 1.0 | 1.0 | 1.1 | AMYG1        | complemer glucoamylase glucoamyla orf19.4899               | 8948 CaAMYG1     | C-compound and carbohydrate metabolism ENERGY SUBCELLULAR LOCALISATION                       |
| CA0856 | 1.0 | 1.1  | 1.0 | 1.1 | 1.0 | 0.9 | IFL1         | 4203810..4 unknown function orf19.1194                     | 14489 CaIFL1     | CELL RESCUE DEFENSE AND VIRULENCE ""CELL FATE                                                |
| CA0857 | 0.9 | 1.0  | 1.0 | 1.0 | 1.1 | 0.9 | SEN15        | 4205571..4 tRNA splicing endonuclease delta orf19.4464     | 14490 CaSEN15    | No significant S.c. match                                                                    |
| CA0858 | 0.9 | 0.9  | 1.0 | 1.1 | 1.0 | 1.1 | IPF14493     | complemer unknown function orf19.4465                      | 14493 IPF14493   | No significant S.c. match                                                                    |
| CA0859 | 1.0 | 1.1  | 1.0 | 1.0 | 1.1 | 1.0 | IPF14495.3   | complemer similar to Saccharomyces cerevisi: orf19.1194    | 14495 IPF14495.3 | PROTEIN FATE [folding modification destination] transferase activity                         |
| CA0860 | 1.0 | 0.9  | 1.0 | 1.0 | 0.9 | 1.0 | IPF17272     | 4213479..4 unknown function orf19.3522                     | 17272 IPF17272   | No significant S.c. match                                                                    |
| CA0861 | 1.0 | 1.0  | 1.0 | 1.0 | 0.9 | 1.0 | CRK1.3F      | complemer Protein kinase, 3-prime CDC2-relat orf19.3523    | 17271 CaCRK1.3   | No significant S.c. match                                                                    |
| CA0862 | 1.0 | 1.0  | 0.9 | 1.0 | 1.0 | 0.9 | CRK1.5F      | complemer Protein kinase, 5-prime CDC2-relat orf19.3524    | 17267 CaCRK1.5   | CELL CYCLE AND DNA PROCESSING CELL FATE protein kinase activity                              |
| CA0863 | 1.1 | 1.1  | 0.9 | 0.8 | 1.0 | 1.0 | ITR2         | complemer Myo-inositol transporter (by homol orf19.3526    | 4456 CaITR2      | C-compound and carbohydrate metabolism ""Lipid fatty-acid and isopren transporter activity   |
| CA0864 | 0.9 | 1.2  | 1.0 | 0.9 | 1.0 | 0.9 | CYT1         | complemer cytochrome-c1 (by homology) orf19.3527           | 4458 CaCYT1      | ENERGY SUBCELLULAR LOCALISATION transporter activity                                         |
| CA0865 | 1.0 | 1.0  | 1.0 | 1.0 | 1.0 | 0.9 | IFM2         | 4224960..4 Glycerate-formate-dehydrogenase orf19.3584      | 14777 CaIFM2     | C-compound and carbohydrate metabolism                                                       |
| CA0866 | 1.0 | 0.9  | 1.0 | 1.0 | 1.0 | 1.0 | IPF14775     | complemer unknown function orf19.3585                      | 14775 IPF14775   | UNCLASSIFIED PROTEINS molecular_function unknown                                             |
| CA0867 | 1.0 | 1.0  | 1.0 | 1.1 | 1.0 | 1.0 | IPF14773.EXC | complemer unknown function, exon 2 orf19.3586              | 14774 IPF14773.5 | No significant S.c. match                                                                    |
| CA0869 | 1.0 | 1.0  | 1.0 | 1.1 | 1.0 | 1.0 | IPF14772     | 4228888..4 unknown function orf19.3589                     | 14772 IPF14772   | CELL CYCLE AND DNA PROCESSING SUBCELLULAR LOCALISATION DNA binding                           |
| CA0870 | 1.1 | 1.2  | 1.0 | 1.1 | 1.2 | 1.2 | IPP1         | 4230096..4 inorganic pyrophosphatase (by ho orf19.3590     | 19604 CaIPP1     | Phosphate metabolism SUBCELLULAR LOCALISATION hydrolase activity                             |
| CA0871 | 1.0 | 1.0  | 1.0 | 1.0 | 1.1 | 1.1 | APE3         | 4231613..4 aminopeptidase (by homology) orf19.3591         | 16625 CaAPE3     | PROTEIN FATE [folding modification destination] ""SUBCELLULAR LOC peptidase activity         |
| CA0872 | 1.0 | 1.0  | 1.0 | 0.9 | 1.0 | 1.0 | IPF13100     | complemer unknown function orf19.3592                      | 13100 IPF13100   | PROTEIN FATE [folding modification destination] ""SUBCELLULAR LOC chaperone activity         |
| CA0873 | 1.0 | 1.0  | 0.9 | 1.0 | 1.0 | 1.0 | BUL1         | 4237825..4 Ubiquitin ligase binding protein orf19.1209     | 9241 CaBUL1      | PROTEIN FATE [folding modification destination] protein binding                              |
| CA0874 | 1.0 | 0.9  | 1.1 | 1.0 | 1.0 | 1.1 | CPA1         | 4241368..4 Arginine-specific carbamoylphosph orf19.1210    | 11885 CaCPA1     | Amino acid metabolism SUBCELLULAR LOCALISATION ligase activity                               |
| CA0875 | 1.1 | 0.9  | 1.0 | 1.0 | 1.0 | 0.9 | ERG251       | 4244711..4 C-4 sterol methyl oxidase (by hom orf19.1210    | 8993 CaERG251    | Lipid fatty-acid and isoprenoid metabolism ""SUBCELLULAR LOCALISATION                        |
| CA0876 | 1.0 | 1.0  | 1.0 | 1.0 | 1.0 | 1.0 | VMA6         | 4247506..4 H+-ATPase V0 domain 36 KD subor orf19.7996      | 19887 CaVMA6     | PROTEIN FATE [folding modification destination] ""CELLULAR TRANSP transporter activity       |
| CA0877 | 1.1 | 1.0  | 1.0 | 1.0 | 1.0 | 1.1 | CNH1.5F      | 4249699..4 Na+/H+ antiporter, 5-prime end (borf19.8000     | 10959 CaCNH1.5   | REGULATION OF/INTERACTION WITH CELLULAR ENVIRONMENT Ti transporter activity                  |
| CA0878 | 1.0 | 1.0  | 1.0 | 0.9 | 1.0 | 0.9 | CNH1.3F      | 4251525..4 Na+/H+ antiporter, 3-prime end (borf19.8001     | 18845 CaCNH1.3   | REGULATION OF/INTERACTION WITH CELLULAR ENVIRONMENT TRANSPORT FACILITATION                   |
| CA0879 | 0.9 | 0.9  | 1.0 | 0.9 | 1.1 | 0.9 | IPF19542.5F  | 4252167..4 unknown function, 5-prime end orf19.8003        | 19542 IPF19542.5 | Amino acid metabolism TRANSCRIPTION SUBCELLULAR LOCALISATION                                 |
| CA0880 | 1.0 | 1.0  | 1.1 | 1.0 | 1.0 | 1.1 | IPF19542.3F  | 4253029..4 unknown function, 3-prime end orf19.372         | 16966 IPF19542.3 | UNCLASSIFIED PROTEINS molecular_function unknown                                             |
| CA0881 | 0.9 | 1.0  | 0.9 | 0.9 | 1.1 | 1.0 | IPF16965     | complemer unknown function orf19.8006                      | 16965 IPF16965   | CLASSIFICATION NOT YET CLEAR-CUT molecular_function unknown                                  |
| CA0882 | 1.0 | 1.0  | 1.0 | 1.0 | 1.0 | 1.0 | PHR3         | 4257794..4 surface glycoprotein (b PHR3p [Ca orf19.8010    | 12107 CaPHR3     | CLASSIFICATION NOT YET CLEAR-CUT molecular_function unknown                                  |
| CA0883 | 0.7 | 0.5  | 1.0 | 0.7 | 0.9 | 0.6 | SUN41        | 4266853..4 Putative cell wall beta-glucosidase orf19.3642  | 14577 CaSUN41    | CELL CYCLE AND DNA PROCESSING CELL FATE molecular_function unknown                           |
| CA0884 | 0.9 | 0.9  | 0.9 | 0.9 | 0.9 | 0.9 | CAN5         | complemer amino acid permease (by homology orf19.3641      | 19550 CaCAN5     | Amino acid metabolism CELLULAR TRANSPORT AND TRANSPORT MECHANISMS SUBCELLULAR LO             |
| CA0885 | 1.0 | 1.0  | 1.1 | 1.2 | 1.1 | 1.1 | IPF12381     | 4273724..4 unknown function orf19.1389                     | 12381 IPF12381   | TRANSCRIPTION RNA binding                                                                    |
| CA0886 | 1.0 | 1.0  | 1.0 | 1.0 | 1.0 | 1.1 | IPF12382     | 4276766..4 unknown function orf19.1388                     | 12382 IPF12382   | SUBCELLULAR LOCALISATION molecular_function unknown                                          |
| CA0887 | 1.0 | 1.1  | 0.9 | 1.0 | 1.0 | 1.0 | IPF12383     | complemer unknown function orf19.1387                      | 12383 IPF12383   | UNCLASSIFIED PROTEINS molecular_function unknown                                             |
| CA0888 | 1.1 | 1.0  | 1.0 | 1.1 | 0.9 | 1.0 | BET1         | 4278785..4 involved in ER-Golgi transport (by orf19.1386   | 12385 CaBET1     | CELLULAR TRANSPORT AND TRANSPORT MECHANISMS SUBCELL transporter activity                     |
| CA0889 | 1.0 | 1.0  | 1.0 | 1.0 | 1.0 | 1.0 | IPF11767     | 4284439..4 mitochondrial carrier protein (by hcorf19.4733  | 11767 IPF11767   | CELLULAR TRANSPORT AND TRANSPORT MECHANISMS SUBCELLULAR LOCALISATION TRANSP                  |
| CA0890 | 0.9 | 1.1  | 1.0 | 0.9 | 0.9 | 1.0 | IPF11766     | 4285793..4 unknown function orf19.4734                     | 11766 IPF11766   | PROTEIN FATE [folding modification destination]                                              |
| CA0891 | 1.0 | 0.9  | 1.1 | 1.0 | 1.0 | 0.9 | IPF11764     | 4287107..4 unknown function orf19.4735                     | 11764 IPF11764   | UNCLASSIFIED PROTEINS molecular_function unknown                                             |
| CA0892 | 1.0 | 1.0  | 1.0 | 0.9 | 0.9 | 1.1 | PHO8.5       | 4288986..4 repressible alkaline phosphatase, orf19.4736    | 19888 CaPHO8.5   | Phosphate metabolism SUBCELLULAR LOCALISATION hydrolase activity                             |
| CA0893 | 1.0 | 1.0  | 0.9 | 0.8 | 1.0 | 1.1 | IPF13517     | 4294111..4 unknown function orf19.5752                     | 13517 IPF13517   | UNCLASSIFIED PROTEINS molecular_function unknown                                             |
| CA0894 | 1.0 | 1.0  | 1.0 | 1.0 | 0.9 | 1.0 | ORM1         | 4296932..4 unknown function orf19.5751                     | 13514 CaORM1     | UNCLASSIFIED PROTEINS molecular_function unknown                                             |
| CA0895 | 1.2 | 1.0  | 1.2 | 1.1 | 1.1 | 1.2 | SHM2         | 4299044..4 Serine hydroxymethyltransferase orf19.5750      | 15120 CaSHM2     | Nucleotide metabolism Purine ribonucleotide metabolism ""Lipid fatty-ac transferase activity |
| CA0896 | 1.0 | 0.9  | 0.7 | 0.4 | 0.9 | 0.8 | SBA1         | 4300930..4 Hsp90 (Ninety) Associated Co-cha orf19.5749     | 15122 CaSBA1     | PROTEIN FATE [folding modification destination] ""CELL FATE chaperone activity               |
| CA0897 | 1.0 | 0.9  | 1.0 | 0.9 | 1.0 | 1.0 | IPF4902      | 4304092..4 unknown function orf19.8043                     | 4902 IPF4902     | No significant S.c. match                                                                    |
| CA0898 | 1.0 | 0.9  | 1.0 | 0.9 | 1.0 | 1.0 | SSH1.3       | complemer involved in co-translational pathwa orf19.412    | 4903 CaSSH1.3    | PROTEIN FATE [folding modification destination] ""SUBCELLULAR LOC transporter activity       |
| CA0899 | 1.0 | 1.0  | 1.1 | 1.1 | 0.9 | 1.0 | IPF4905      | complemer unknown function orf19.411                       | 4905 IPF4905     | No significant S.c. match                                                                    |
| CA0900 | 0.9 | 1.0  | 1.0 | 1.0 | 0.9 | 0.9 | IPF12031     | 4316540..4 unknown function hypothetica orf19.3411         | 12031 IPF12031   | Metabolism of vitamins cofactors and prosthetic groups molecular_function unknown            |
| CA0901 | 1.0 | 1.0  | 1.0 | 1.0 | 1.0 | 1.0 | IPF12033     | 4317758..4 unknown function orf19.3412                     | 12033 IPF12033   | UNCLASSIFIED PROTEINS hydrolase activity                                                     |
| CA0902 | 1.0 | 1.0  | 1.0 | 1.0 | 1.0 | 0.9 | IPF12034     | complemer unknown function orf19.3413                      | 12034 IPF12034   | No significant S.c. match                                                                    |

|        |     |     |     |     |     |     |              |                                                                |                  |                                                                                                    |                                       |
|--------|-----|-----|-----|-----|-----|-----|--------------|----------------------------------------------------------------|------------------|----------------------------------------------------------------------------------------------------|---------------------------------------|
| CA0903 | 1.2 | 1.2 | 1.1 | 1.0 | 1.1 | 1.0 | IPF4401      | 4323951..4 putative succinate dehydrogenase orf19.1480         | 4401 IPF4401     | ENERGY                                                                                             | molecular_function unknown            |
| CA0904 | 1.1 | 1.0 | 1.2 | 1.1 | 1.1 | 1.0 | IPF4403      | complemer unknown function orf19.1481                          | 4403 IPF4403     | No significant S.c. match                                                                          |                                       |
| CA0905 | 1.1 | 1.2 | 1.1 | 1.0 | 1.0 | 1.0 | IPF4405      | 4328219..4 unknown function orf19.1482                         | 4405 IPF4405     | No significant S.c. match                                                                          |                                       |
| CA0906 | 1.0 | 1.0 | 1.0 | 1.0 | 0.9 | 1.0 | IPF4406      | complemer unknown function orf19.1483                          | 4406 IPF4406     | UNCLASSIFIED PROTEINS                                                                              | molecular_function unknown            |
| CA0907 | 1.0 | 1.0 | 1.0 | 1.0 | 1.0 | 1.0 | IPF19889     | 4329345..4 Unknown Function orf19.1484                         | 19889 IPF19889   | No significant S.c. match                                                                          |                                       |
| CA0908 | 1.1 | 1.0 | 1.1 | 0.9 | 1.0 | 1.0 | MRPL31       | complemer Mitochondrial ribosomal protein orf19.1485           | 6016 CaMRPL31    | PROTEIN SYNTHESIS SUBCELLULAR LOCALISATION                                                         | structural molecule activity          |
| CA0910 | 1.1 | 1.1 | 0.9 | 0.9 | 1.0 | 1.1 | MRPL16       | 4342281..4 ribosomal protein orf19.9569                        | 4102 CaMRPL16    | PROTEIN SYNTHESIS SUBCELLULAR LOCALISATION                                                         | structural molecule activity          |
| CA0911 | 0.9 | 1.0 | 1.0 | 1.0 | 1.1 | 1.0 | IPF14814     | complemer unknown function orf19.9568                          | 14814 IPF14814   | PROTEIN FATE [folding modification destination]                                                    | molecular_function unknown            |
| CA0912 | 1.0 | 1.0 | 1.0 | 1.0 | 1.0 | 1.0 | RPA49        | 4344552..4 DNA-directed RNA polymerase A orf19.9567            | 14813 CaRPA49    | TRANSCRIPTION SUBCELLULAR LOCALISATION                                                             | nucleotidyltransferase activity       |
| CA0913 | 1.0 | 1.1 | 1.1 | 1.0 | 0.9 | 1.0 | IPF14810     | complemer unknown function orf19.9566                          | 14810 IPF14810   | Lipid fatty-acid and isoprenoid metabolism ""CELL CYCLE AND DNA PR                                 | molecular_function unknown            |
| CA0914 | 1.1 | 1.0 | 1.0 | 1.0 | 1.0 | 1.1 | SRA1         | complemer cAMP dependent prote cAMP-depe orf19.9565            | 19590 CaSRA1     | C-compound and carbohydrate metabolism TRANSCRIPTION ""CELL R enzyme regulator activity            |                                       |
| CA0915 | 1.0 | 0.8 | 0.7 | 0.4 | 0.6 | 0.7 | KAR2         | 4350772..4 dnaK-type molecular chaperone (torf19.9564          | 15827 CaKAR2     | CELL CYCLE AND DNA PROCESSING ""PROTEIN FATE [folding modifi                                       | chaperone activity                    |
| CA0916 | 1.0 | 1.1 | 1.0 | 1.0 | 1.0 | 0.8 | LYS2         | complemer L-aminoadipate-semial alpha-amin orf19.2970          | 19710 CaLYS2     | Amino acid metabolism SUBCELLULAR LOCALISATION                                                     | oxidoreductase activity               |
| CA0917 | 0.9 | 1.0 | 1.0 | 1.0 | 1.0 | 1.0 | RAD16        | complemer nucleotide excision repair protein (orf19.2969       | 15502 CaRAD16    | CELL CYCLE AND DNA PROCESSING SUBCELLULAR LOCALISATIO                                              | hydrolase activity                    |
| CA0918 | 1.0 | 0.9 | 0.9 | 1.0 | 1.0 | 1.0 | IPF17881     | complemer cyclin (by homology) orf19.1041                      | 17881 IPF17881   | TRANSCRIPTION SUBCELLULAR LOCALISATION                                                             | protein kinase activity,enzyme regi   |
| CA0919 | 1.6 | 2.1 | 0.9 | 0.8 | 0.9 | 0.7 | POR1         | complemer mitochondrial outer membrane pororf19.1042           | 12994 CaPOR1     | CELLULAR TRANSPORT AND TRANSPORT MECHANISMS SUBCELL                                                | transporter activity                  |
| CA0920 | 1.1 | 1.0 | 1.0 | 1.0 | 1.0 | 1.0 | IPF18833     | 4367748..4 unknown function orf19.1043                         | 18833 IPF18833   | No significant S.c. match                                                                          |                                       |
| CA0921 | 0.9 | 1.0 | 1.0 | 1.0 | 1.0 | 1.0 | IPF12992     | 4368845..4 unknown function orf19.1043                         | 12992 IPF12992   | UNCLASSIFIED PROTEINS                                                                              | molecular_function unknown            |
| CA0922 | 1.0 | 1.0 | 1.0 | 0.9 | 1.0 | 1.0 | IPF12991     | complemer unknown function orf19.1045                          | 12991 IPF12991   | TRANSCRIPTION                                                                                      | RNA binding                           |
| CA0923 | 1.1 | 1.0 | 1.0 | 1.0 | 1.0 | 0.9 | IPF12987     | 4370933..4 unknown function orf19.1047                         | 12987 IPF12987   | UNCLASSIFIED PROTEINS                                                                              | molecular_function unknown            |
| CA0924 | 0.9 | 1.0 | 1.3 | 1.9 | 1.3 | 1.4 | IFD5         | 4374190..4 Putative aryl-alcohol dehydrogena orf19.1048        | 17049 CaIFD5     | C-compound and carbohydrate metabolism ENERGY                                                      |                                       |
| CA0925 | 1.0 | 1.0 | 1.0 | 1.0 | 1.0 | 1.0 | IPF17050     | complemer unknown function orf19.1049                          | 17050 IPF17050   | ENERGY                                                                                             |                                       |
| CA0926 | 0.9 | 1.0 | 1.0 | 1.1 | 0.9 | 1.1 | IPF11335     | 4381652..4 Member of the phosphate permea orf19.3663           | 11335 IPF11335   | Phosphate metabolism REGULATION OF/INTERACTION WITH CELLU                                          | transporter activity                  |
| CA0927 | 0.9 | 1.0 | 1.1 | 1.0 | 1.0 | 1.1 | IPF11332     | 4385006..4 unknown function orf19.3661                         | 11332 IPF11332   | PROTEIN FATE [folding modification destination]                                                    | peptidase activity                    |
| CA0928 | 1.0 | 0.9 | 1.0 | 1.0 | 1.0 | 1.1 | IPF19891     | 4388461..4 unknown function orf19.8192                         | 19891 IPF19891   | No significant S.c. match                                                                          |                                       |
| CA0929 | 1.0 | 1.0 | 1.0 | 0.9 | 1.0 | 0.9 | GUT1         | complemer Glycerol kinase (by homology) orf19.558              | 3751 CaGUT1      | C-compound and carbohydrate metabolism                                                             | transferase activity                  |
| CA0930 | 1.1 | 1.0 | 1.1 | 1.0 | 0.9 | 1.0 | ZORRO1A      | complemer Putative reverse trans reverse tra orf19.559         | 3750 CaZorro1a   | CELL CYCLE AND DNA PROCESSING CELLULAR TRANSPORT AND TRANSPORT MECHANISMS SUE                      |                                       |
| CA0931 | 1.1 | 1.0 | 1.0 | 0.9 | 1.0 | 1.0 | IPF3748      | complemer unknown function orf19.562                           | 3748 IPF3748     | CELL CYCLE AND DNA PROCESSING CONTROL OF CELLULAR ORGANIZATION SUBCELLULAR LO                      |                                       |
| CA0932 | 1.0 | 0.9 | 1.0 | 1.0 | 1.0 | 1.0 | EPT1         | complemer alcohol phosphatidyl transferase (lorf19.3695        | 8065 CaEPT1      | Lipid fatty-acid and isoprenoid metabolism ""CELLULAR TRANSPORT A transferase activity             |                                       |
| CA0933 | 0.9 | 0.9 | 1.0 | 1.1 | 1.0 | 1.1 | ATM1         | complemer ATP-binding cassette transporter (orf19.8678         | 14199 CaATM1     | CELLULAR TRANSPORT AND TRANSPORT MECHANISMS REGULA                                                 | transporter activity,hydrolase activi |
| CA0934 | 0.9 | 1.0 | 1.0 | 1.0 | 1.0 | 1.1 | IPF14203.3F  | complemer similarity to several transaminases orf19.1078       | 14202 IPF14203.3 | Amino acid metabolism Nitrogen and sulphur metabolism                                              |                                       |
| CA0935 | 1.0 | 0.9 | 0.9 | 1.0 | 1.0 | 1.0 | IPF14203.5F  | complemer similarity to several transaminases orf19.1079       | 14203 IPF14203.5 | Amino acid metabolism Nitrogen and sulphur metabolism                                              | transferase activity                  |
| CA0936 | 1.1 | 1.0 | 1.0 | 1.0 | 0.9 | 0.9 | IPF16291     | 4422849..4 unknown function orf19.1080                         | 16291 IPF16291   | No significant S.c. match                                                                          |                                       |
| CA0937 | 1.0 | 0.9 | 1.0 | 1.0 | 1.0 | 1.0 | IPF19892     | 4425035..4 unknown function orf19.8683                         | 19892 IPF19892   | No significant S.c. match                                                                          |                                       |
| CA0938 | 1.0 | 0.8 | 0.8 | 0.7 | 0.9 | 1.0 | COX12        | 4425874..4 cytochrome-c oxidase, subunit VIB (by homok         | 16288 CaCOX12    | ENERGY ""PROTEIN FATE [folding modification destination] ""SUBCELL                                 | oxidoreductase activity               |
| CA0939 | 1.0 | 1.0 | 1.0 | 1.1 | 1.0 | 0.9 | DBP6         | complemer RNA helicase required for 60S rib orf19.3704         | 8614 CaDBP6      | TRANSCRIPTION ""PROTEIN FATE [folding modification destination] ""C                                | RNA binding,helicase activity         |
| CA0940 | 1.0 | 1.0 | 1.0 | 1.0 | 1.0 | 0.9 | IPF8616      | 4429583..4 similar to Saccharomyces cerevisiae Rsm19p          | 8616 IPF8616     | PROTEIN SYNTHESIS                                                                                  | structural molecule activity          |
| CA0941 | 0.9 | 1.0 | 1.0 | 1.0 | 1.0 | 1.1 | IPF8617      | complemer unknown function orf19.3705                          | 8617 IPF8617     | UNCLASSIFIED PROTEINS                                                                              | protein phosphatase activity          |
| CA0942 | 1.0 | 0.9 | 0.9 | 1.0 | 1.1 | 1.0 | IPF8619      | 4432166..4 unknown function orf19.3706                         | 8619 IPF8619     | PROTEIN FATE [folding modification destination]                                                    |                                       |
| CA0943 | 0.6 | 0.3 | 0.9 | 1.0 | 1.0 | 0.9 | YHB1         | complemer flavohemoglobin (by homology) orf19.3707             | 8621 CaYHB1      | CELL RESCUE DEFENSE AND VIRULENCE ""SUBCELLULAR LOCAL                                              | molecular_function unknown            |
| CA0944 | 1.1 | 1.0 | 1.0 | 1.1 | 1.1 | 1.0 | IPF10280     | complemer unknown function orf19.8852                          | 10280 IPF10280   | No significant S.c. match                                                                          |                                       |
| CA0945 | 1.0 | 1.1 | 1.1 | 0.9 | 0.9 | 1.1 | IPF10278     | 4442823..4 DNA-J - like protein (by homology) orf19.8853       | 10278 IPF10278   | PROTEIN FATE [folding modification destination]                                                    |                                       |
| CA0946 | 1.0 | 1.0 | 1.1 | 1.1 | 1.1 | 1.0 | IPF10277     | 4444560..4 unknown function orf19.1270                         | 10277 IPF10277   | UNCLASSIFIED PROTEINS                                                                              | molecular_function unknown            |
| CA0947 | 1.0 | 1.0 | 1.1 | 1.0 | 1.0 | 1.1 | CFL3         | 4445719..4 ferric reductase-like protein orf19.1272            | 10273 CaCFL3     | REGULATION OF/INTERACTION WITH CELLULAR ENVIRONMENT Other virulence attributes                     |                                       |
| CA0948 | 1.0 | 1.0 | 1.1 | 0.9 | 1.0 | 1.0 | IPF10270     | complemer unknown function orf19.1272                          | 10270 IPF10270   | UNCLASSIFIED PROTEINS                                                                              | molecular_function unknown            |
| CA0949 | 1.0 | 1.1 | 0.9 | 1.1 | 1.0 | 1.0 | IPF10269     | 4450250..4 Gim complex component-like by hiorf19.8859          | 10269 IPF10269   | CELL CYCLE AND DNA PROCESSING ""PROTEIN FATE [folding modifi                                       | protein binding                       |
| CA0950 | 0.9 | 1.0 | 0.9 | 0.9 | 1.0 | 1.0 | IPF3737      | complemer similar to Saccharomyces cerevisi orf19.1012         | 3737 IPF3737     | PROTEIN FATE [folding modification destination] ""CELLULAR TRANSP                                  | protein binding                       |
| CA0951 | 1.0 | 1.1 | 1.0 | 1.0 | 1.0 | 1.0 | MNN6         | 4458347..4 putative golgi alpha-1,2-mannosyl orf19.1011        | 3740 CaMNN6      | CELL FATE                                                                                          | transferase activity                  |
| CA0952 | 1.0 | 1.0 | 1.0 | 0.9 | 1.0 | 1.0 | MNT3.3EOC    | complemer Putative mannosyltransferase, 3-prime end orf19.1144 | 19564 CaMNT3.3   | C-compound and carbohydrate metabolism ""PROTEIN FATE [folding modification destination] ""SUBCELL |                                       |
| CA0953 | 1.0 | 1.0 | 0.9 | 1.0 | 1.1 | 1.1 | IPF13166.3EC | 4462120..4 unknown function, 3-prime end orf19.1144            | 13166 IPF13166.3 | C-compound and carbohydrate metabolism                                                             |                                       |
| CA0954 | 0.9 | 0.9 | 1.0 | 1.0 | 1.0 | 1.0 | IPF13162     | 4468223..4 unknown function orf19.1142                         | 13162 IPF13162   | UNCLASSIFIED PROTEINS                                                                              | transporter activity                  |
| CA0955 | 1.0 | 1.0 | 1.0 | 1.0 | 1.0 | 0.9 | IPF13160     | complemer unknown function orf19.1140                          | 13160 IPF13160   | UNCLASSIFIED PROTEINS                                                                              |                                       |
| CA0956 | 0.9 | 1.0 | 1.0 | 1.0 | 1.0 | 1.0 | IPF14914     | 4484183..4 putative ankyrin (by homology) orf19.1219           | 14914 IPF14914   | UNCLASSIFIED PROTEINS                                                                              | hydrolase activity                    |
| CA0957 | 1.0 | 1.0 | 1.1 | 1.0 | 1.0 | 0.9 | IPF14322     | 4489509..4 unknown function orf19.6248                         | 14322 IPF14322   | UNCLASSIFIED PROTEINS                                                                              | molecular_function unknown            |
| CA0958 | 1.0 | 0.9 | 1.0 | 1.0 | 1.1 | 1.0 | SEC24        | complemer component of COPII coat of ER-G orf19.1219           | 14321 CaSEC24    | CELLULAR TRANSPORT AND TRANSPORT MECHANISMS SUBCELL                                                | protein binding                       |
| CA0959 | 1.0 | 0.9 | 0.9 | 1.3 | 1.1 | 1.1 | SAM2         | complemer S-adenosylmethionine synthetase orf19.657            | 15535 CaSAM2     | Amino acid metabolism                                                                              | transferase activity                  |
| CA0960 | 1.0 | 0.9 | 1.0 | 1.0 | 1.0 | 1.0 | DPP1         | complemer Diacylglycerol Pyrophosphate Pho orf19.8271          | 5432 CaDPP1      | Lipid fatty-acid and isoprenoid metabolism ""CELL CYCLE AND DNA PROCESSING CELL FATE               |                                       |
| CA0961 | 1.1 | 1.1 | 0.9 | 1.0 | 1.0 | 0.9 | IPF18822     | 4509850..4 unknown function orf19.3720                         | 18822 IPF18822   | C-compound and carbohydrate metabolism CELL CYCLE AND DNA PROCESSING CELLULAR TRANSP               |                                       |
| CA0962 | 1.2 | 1.1 | 1.0 | 1.0 | 1.0 | 0.9 | IPF9145      | complemer unknown function orf19.6245                          | 9145 IPF9145     | No significant S.c. match                                                                          |                                       |
| CA0963 | 1.0 | 1.0 | 1.1 | 1.0 | 1.0 | 1.0 | IPF9143      | complemer similar to Saccharomyces cerevisi orf19.6246         | 9143 IPF9143     | PROTEIN FATE [folding modification destination]                                                    | transferase activity                  |
| CA0964 | 1.0 | 0.9 | 1.0 | 1.1 | 0.9 | 1.0 | IPF9141      | complemer similar to Saccharomyces cerevisi orf19.6247         | 9141 IPF9141     | CELL CYCLE AND DNA PROCESSING SUBCELLULAR LOCALISATIO                                              | DNA binding                           |
| CA0965 | 1.1 | 1.1 | 0.9 | 1.0 | 1.0 | 1.0 | IPF9139      | 4524296..4 unknown function orf19.6248                         | 9139 IPF9139     | No significant S.c. match                                                                          |                                       |
| CA0966 | 1.2 | 1.0 | 1.0 | 1.0 | 0.9 | 0.9 | IPF9136.5EOC | 4526750..4 potassium transporter, 5-prime en orf19.6249        | 9136 IPF9136.5   | CELL RESCUE DEFENSE AND VIRULENCE ""TRANSPORT FACILITATION                                         |                                       |
| CA0968 | 1.0 | 1.0 | 1.0 | 1.0 | 0.9 | 1.0 | SAP6         | 4534813..4 secreted aspartyl prote aspartyl pr orf19.1298      | 12747 CaSAP6     | PROTEIN FATE [folding modification destination] ""CELL FATE SUBCELLULAR LOCALISATION Other vir     |                                       |
| CA0969 | 1.1 | 1.1 | 1.0 | 1.0 | 0.9 | 1.0 | IPF9132      | 4538352..4 unknown function orf19.1298                         | 9132 IPF9132     | UNCLASSIFIED PROTEINS                                                                              | molecular_function unknown            |
| CA0970 | 1.0 | 1.0 | 1.1 | 1.1 | 1.0 | 0.9 | IPF10894     | complemer unknown function orf19.1034                          | 10894 IPF10894   | CELLULAR TRANSPORT AND TRANSPORT MECHANISMS SUBCELL                                                | protein binding                       |
| CA0971 | 1.0 | 1.1 | 1.0 | 0.9 | 0.9 | 1.0 | IPF11428     | complemer unknown function orf19.6470                          | 11428 IPF11428   | CELL RESCUE DEFENSE AND VIRULENCE ""REGULATION OF/INTERACTION WITH CELLULAR ENV                    |                                       |
| CA0972 | 1.3 | 1.8 | 1.3 | 1.1 | 1.1 | 1.1 | CYP1         | 4559821..4 cyclophilin (peptidylprolyl isomeras orf19.6472     | 17713 CaCYP1     | PROTEIN FATE [folding modification destination] ""CELL RESCUE DE                                   | isomerase activity                    |
| CA0973 | 1.0 | 1.0 | 0.9 | 1.1 | 1.0 | 1.0 | IPF12662     | complemer unknown function orf19.6474                          | 12662 IPF12662   | No significant S.c. match                                                                          |                                       |
| CA0975 | 1.0 | 0.9 | 1.0 | 1.0 | 1.1 | 1.1 | IPF18811     | complemer unknown function orf19.1108                          | 18811 IPF18811   | No significant S.c. match                                                                          |                                       |
| CA0976 | 1.1 | 1.0 | 0.9 | 1.0 | 1.0 | 1.1 | PEX17        | 4567179..4 Peroxisomal peripheral membrane orf19.1108          | 17165 CaPEX17    | No significant S.c. match                                                                          |                                       |
| CA0977 | 1.0 | 1.0 | 1.1 | 1.1 | 1.1 | 1.0 | IPF18810     | 4568339..4 unknown function orf19.1108                         | 18810 IPF18810   | UNCLASSIFIED PROTEINS                                                                              | molecular_function unknown            |

|        |     |     |     |     |     |     |              |                                                 |            |       |            |                                                                                       |                                     |
|--------|-----|-----|-----|-----|-----|-----|--------------|-------------------------------------------------|------------|-------|------------|---------------------------------------------------------------------------------------|-------------------------------------|
| CA0978 | 1.0 | 1.1 | 1.1 | 1.0 | 1.0 | 1.0 | IPF16222     | 4570643..4 unknown function                     | orf19.3603 | 16222 | IPF16222   | UNCLASSIFIED PROTEINS                                                                 | molecular_function unknown          |
| CA0979 | 1.0 | 1.1 | 1.1 | 1.0 | 1.0 | 1.0 | IPF19713     | 4573238..4 unknown function                     | orf19.3601 | 19713 | IPF19713   | CELL CYCLE AND DNA PROCESSING CONTROL OF CELLULAR ORGANIZATION                        |                                     |
| CA0980 | 1.0 | 1.0 | 1.0 | 1.0 | 1.0 | 1.0 | IPF17655     | 4575038..4 unknown function                     | orf19.3600 | 17655 | IPF17655   | No significant S.c. match                                                             |                                     |
| CA0981 | 1.1 | 1.1 | 1.0 | 1.0 | 1.1 | 1.0 | GAP4         | complemer general amino acid permease (by       | orf19.1799 | 19644 | CaGAP4     | Amino acid metabolism CELLULAR TRANSPORT AND TRANSPORT MECHANISMS SUBCELLULAR LO      |                                     |
| CA0982 | 1.0 | 1.0 | 1.0 | 1.0 | 1.0 | 1.0 | IPF7397      | complemer unknown function                      | orf19.1800 | 7397  | IPF7397    | UNCLASSIFIED PROTEINS                                                                 | molecular_function unknown          |
| CA0983 | 1.0 | 1.0 | 1.0 | 0.9 | 1.0 | 0.9 | CBR1         | complemer Cytochrome-b5 reductase (by hom       | orf19.1801 | 7398  | CaCBR1     | ENERGY SUBCELLULAR LOCALISATION                                                       | transporter activity                |
| CA0984 | 1.0 | 1.0 | 1.0 | 0.9 | 1.0 | 1.0 | IPF7400      | complemer unknown function                      | orf19.1802 | 7400  | IPF7400    | UNCLASSIFIED PROTEINS                                                                 | molecular_function unknown          |
| CA0985 | 1.0 | 1.0 | 1.0 | 1.1 | 0.9 | 1.0 | IPF4815      | 4598955..4 unknown Function                     | orf19.3351 | 4815  | IPF4815    | No significant S.c. match                                                             |                                     |
| CA0986 | 0.9 | 1.0 | 1.0 | 1.0 | 1.1 | 1.1 | IPF4814      | complemer similar to Saccharomyces cerevisi     | orf19.3350 | 4814  | IPF4814    | PROTEIN SYNTHESIS SUBCELLULAR LOCALISATION                                            | structural molecule activity        |
| CA0987 | 1.0 | 1.0 | 1.0 | 1.1 | 1.0 | 1.1 | RPB140       | 4601325..4 DNA-dependent RNA pDNA-deper         | orf19.3349 | 4811  | CaRPB140   | TRANSCRIPTION SUBCELLULAR LOCALISATION                                                | nucleotidyltransferase activity     |
| CA0988 | 0.9 | 0.9 | 1.1 | 1.0 | 1.0 | 1.0 | PMI40        | complemer mannose-6-phosphate mannose-6         | orf19.8968 | 19894 | CaPMI40    | C-compound and carbohydrate metabolism SUBCELLULAR LOCALISATION                       | isomerase activity                  |
| CA0989 | 1.0 | 1.0 | 1.0 | 1.0 | 1.0 | 0.9 | IPF11069     | 4610365..4 unknown function                     | orf19.1391 | 11069 | IPF11069   | No significant S.c. match                                                             |                                     |
| CA0990 | 1.0 | 1.0 | 1.0 | 1.1 | 0.9 | 1.1 | IPF11068     | complemer unknown function                      | orf19.1392 | 11068 | IPF11068   | PROTEIN FATE [folding modification destination]                                       | oxidoreductase activity, isomerase  |
| CA0991 | 0.9 | 1.0 | 1.0 | 0.9 | 1.0 | 0.9 | IPF11065     | complemer unknown function                      | orf19.8971 | 11065 | IPF11065   | Metabolism of vitamins cofactors and prosthetic groups ""CELLULAR TR                  | transporter activity                |
| CA0992 | 1.0 | 1.1 | 1.0 | 1.0 | 1.0 | 1.0 | IPF11063     | 4615600..4 unknown function                     | orf19.8972 | 11063 | IPF11063   | UNCLASSIFIED PROTEINS                                                                 | molecular_function unknown          |
| CA0993 | 1.0 | 1.0 | 1.0 | 1.0 | 1.0 | 0.9 | IPF11059     | 4618933..4 unknown function                     | orf19.8973 | 11059 | IPF11059   | No significant S.c. match                                                             |                                     |
| CA0994 | 0.9 | 1.0 | 1.0 | 1.0 | 0.9 | 1.0 | IPF10077     | complemer 3-oxoacid CoA-transferase by hom      | orf19.2281 | 10077 | IPF10077   | No significant S.c. match                                                             |                                     |
| CA0995 | 1.0 | 1.1 | 1.1 | 1.0 | 1.0 | 1.1 | IPF10074     | complemer unknown function                      | orf19.9822 | 10074 | IPF10074   | No significant S.c. match                                                             |                                     |
| CA0996 | 1.0 | 1.0 | 1.0 | 0.9 | 0.9 | 1.0 | IPF10071     | complemer catabolic 3-dehydroquinase (by ho     | orf19.9823 | 10071 | IPF10071   | No significant S.c. match                                                             |                                     |
| CA0997 | 0.9 | 1.0 | 1.1 | 0.9 | 0.9 | 0.9 | IPF9998      | 4626016..4 unknown function                     | orf19.9824 | 9998  | IPF9998    | No significant S.c. match                                                             |                                     |
| CA0998 | 1.0 | 1.0 | 0.9 | 1.0 | 1.1 | 1.0 | IPF12369     | 4630065..4 Putative dipeptidase (by homology    | orf19.1184 | 12369 | IPF12369   | UNCLASSIFIED PROTEINS                                                                 |                                     |
| CA0999 | 1.0 | 1.0 | 1.0 | 1.1 | 1.0 | 1.1 | IPF12368     | complemer unknown function                      | orf19.1184 | 12368 | IPF12368   | TRANSCRIPTION                                                                         |                                     |
| CA1000 | 1.1 | 1.3 | 0.9 | 0.8 | 0.9 | 1.0 | IPF6011      | complemer unknown function                      | orf19.9061 | 6011  | IPF6011    | No significant S.c. match                                                             |                                     |
| CA1001 | 1.0 | 0.9 | 1.0 | 1.3 | 1.0 | 1.2 | IPF6006      | complemer unknown function                      | orf19.9065 | 6006  | IPF6006    | No significant S.c. match                                                             |                                     |
| CA1002 | 1.0 | 1.0 | 1.0 | 1.0 | 1.1 | 0.9 | ROK1.3       | 4651226..4 RNA helicase, 3-prime DEAD box       | orf19.3756 | 8903  | CaROK1.3   | TRANSCRIPTION                                                                         | RNA binding, helicase activity      |
| CA1003 | 1.2 | 1.1 | 1.0 | 1.0 | 1.0 | 0.9 | ATP20        | complemer F1F0-ATPase complex, G subunit        | orf19.3757 | 8902  | CaATP20    | ENERGY SUBCELLULAR LOCALISATION                                                       | structural molecule activity        |
| CA1004 | 1.0 | 1.0 | 1.0 | 1.1 | 1.0 | 1.1 | IPF8901      | complemer unknown function                      | orf19.3758 | 8901  | IPF8901    | UNCLASSIFIED PROTEINS                                                                 | molecular_function unknown          |
| CA1005 | 1.1 | 1.1 | 1.0 | 1.0 | 1.0 | 1.1 | LPG7         | 4656011..4 probable membrane protein (by h      | orf19.3759 | 8898  | CaLPG7     | TRANSCRIPTION                                                                         | transcription regulator activity    |
| CA1007 | 1.1 | 1.0 | 1.0 | 1.1 | 1.0 | 0.9 | DLH1.3F      | 4657823..4 meiotic recombination protein, 3-p   | orf19.3760 | 8895  | CaDLH1.3F  | CELL CYCLE AND DNA PROCESSING SUBCELLULAR LOCALISATION                                | DNA binding                         |
| CA1008 | 1.0 | 1.0 | 1.0 | 1.0 | 1.0 | 1.0 | IPF14083     | complemer similarity to Saccharomyces cerev     | orf19.6254 | 14083 | IPF14083   | UNCLASSIFIED PROTEINS                                                                 | transporter activity                |
| CA1009 | 1.0 | 1.0 | 1.0 | 1.0 | 1.0 | 0.9 | IPF14084     | complemer unknown function                      | orf19.6255 | 14084 | IPF14084   | UNCLASSIFIED PROTEINS                                                                 | molecular_function unknown          |
| CA1010 | 1.1 | 1.0 | 1.0 | 1.0 | 1.0 | 1.0 | GLT1.3EOC    | complemer glutamate synthase (NAPDPH), 3-       | orf19.6257 | 19715 | CaGLT1.3   | Amino acid metabolism Nitrogen and sulphur metabolism                                 | oxidoreductase activity             |
| CA1011 | 1.0 | 1.0 | 0.9 | 1.0 | 1.0 | 1.0 | SRP101       | 4673540..4 signal recognition particle receptor | orf19.1143 | 19895 | CaSRP101   | PROTEIN FATE [folding modification destination] ""SUBCELLULAR LOCALISATION            |                                     |
| CA1012 | 1.0 | 1.0 | 1.0 | 1.0 | 1.0 | 1.0 | PSD2.5F      | 4675908..4 phosphatidylserine decarboxylase     | orf19.1143 | 14208 | CaPSD2.5F  | Lipid fatty-acid and isoprenoid metabolism ""SUBCELLULAR LOCALISATION                 | lyase activity                      |
| CA1014 | 1.0 | 1.0 | 1.0 | 1.0 | 1.0 | 1.0 | MES1         | complemer methionyl-tRNA synthetase (by ho      | orf19.1143 | 15550 | CaMES1     | PROTEIN SYNTHESIS SUBCELLULAR LOCALISATION                                            | ligase activity                     |
| CA1015 | 1.0 | 1.0 | 1.0 | 1.0 | 1.0 | 1.0 | IPF15547     | 4682821..4 putative glutamyl-tRNA amidotrans    | orf19.1143 | 15547 | IPF15547   | Nitrogen and sulphur metabolism                                                       | hydrolase activity                  |
| CA1016 | 1.0 | 1.0 | 1.1 | 0.9 | 1.0 | 1.0 | IPF11142     | complemer unknown function                      | orf19.473  | 11142 | IPF11142   | CELL RESCUE DEFENSE AND VIRULENCE ""TRANSPORT FACILIT                                 | transporter activity                |
| CA1017 | 1.0 | 0.9 | 1.0 | 0.9 | 0.9 | 1.0 | IPF11144     | complemer unknown function                      | orf19.8105 | 11144 | IPF11144   | UNCLASSIFIED PROTEINS                                                                 | molecular_function unknown          |
| CA1018 | 1.0 | 1.1 | 1.0 | 1.0 | 1.1 | 0.9 | IPF13479.3EC | 4696683..4 unknown function, 3-prime end        | orf19.3768 | 13479 | IPF13479.3 | C-compound and carbohydrate metabolism TRANSCRIPTION SUBCELLULAR LOCALISATION         | molecular_function unknown          |
| CA1019 | 1.0 | 0.9 | 0.9 | 1.0 | 0.9 | 0.9 | IPF13485     | 4700804..4 unknown function                     | orf19.3769 | 13485 | IPF13485   | TRANSPORT FACILITATION                                                                | molecular_function unknown          |
| CA1020 | 0.9 | 0.9 | 1.0 | 1.0 | 0.9 | 1.0 | IPF4824      | complemer unknown function                      | orf19.1086 | 4824  | IPF4824    | UNCLASSIFIED PROTEINS                                                                 | molecular_function unknown          |
| CA1022 | 1.2 | 1.4 | 1.1 | 1.1 | 1.1 | 1.1 | IPF4820      | complemer putativecomplex I intermediate ass    | orf19.1086 | 4820  | IPF4820    | No significant S.c. match                                                             |                                     |
| CA1023 | 1.0 | 1.1 | 1.0 | 1.0 | 1.0 | 1.1 | IPF4817      | 4722193..4 unknown Function                     | orf19.1086 | 4817  | IPF4817    | CLASSIFICATION NOT YET CLEAR-CUT                                                      |                                     |
| CA1024 | 1.1 | 1.2 | 1.0 | 0.9 | 0.9 | 0.9 | CAR1         | complemer arginase by homology                  | orf19.3934 | 10187 | CaCAR1     | Amino acid metabolism Nitrogen and sulphur metabolism SUBCELLUL                       | hydrolase activity                  |
| CA1025 | 1.0 | 1.1 | 1.0 | 1.1 | 1.0 | 1.1 | IPF10184     | 4728318..4 unknown function                     | orf19.3936 | 10184 | IPF10184   | UNCLASSIFIED PROTEINS                                                                 | molecular_function unknown          |
| CA1026 | 1.0 | 1.0 | 1.0 | 1.0 | 1.0 | 1.0 | IPF19645.EXC | 4732034..4 unknown function, exon 1             | orf19.3937 | 19646 | IPF19645.€ | UNCLASSIFIED PROTEINS                                                                 |                                     |
| CA1027 | 1.2 | 1.1 | 1.0 | 1.0 | 1.1 | 1.0 | IPF19645.EXC | 4732648..4 unknown function, exon 2             |            | 19645 | IPF19645.€ | UNCLASSIFIED PROTEINS                                                                 | molecular_function unknown          |
| CA1028 | 0.9 | 1.0 | 0.9 | 1.1 | 1.1 | 1.0 | IPF6488      | 4743360..4 unknown function                     | orf19.1539 | 6488  | IPF6488    | No significant S.c. match                                                             |                                     |
| CA1029 | 1.0 | 1.1 | 1.0 | 1.6 | 1.2 | 1.3 | TLG2         | 4746077..4 Syntaxin family of t-SNAREs (by h    | orf19.9112 | 14397 | CaTLG2     | PROTEIN FATE [folding modification destination] ""CELLULAR TRANSP                     | transporter activity                |
| CA1030 | 1.1 | 1.0 | 1.0 | 1.1 | 1.0 | 1.1 | ZRC1         | complemer Zinc and cadmium resistance prot      | orf19.9111 | 14395 | CaZRC1     | CELLULAR TRANSPORT AND TRANSPORT MECHANISMS ""CELL RI                                 | transporter activity                |
| CA1031 | 1.1 | 1.0 | 1.0 | 0.9 | 1.0 | 1.0 | IPF17469     | 4752283..4 unknown function                     | orf19.3848 | 17469 | IPF17469   | No significant S.c. match                                                             |                                     |
| CA1032 | 0.8 | 0.9 | 0.9 | 1.1 | 1.0 | 1.0 | IPF19896     | complemer unknown function                      | orf19.3852 | 19896 | IPF19896   | No significant S.c. match                                                             |                                     |
| CA1033 | 1.0 | 1.2 | 1.0 | 1.0 | 1.0 | 1.0 | MAD2         | complemer spindle checkpoint complex subun      | orf19.8642 | 17891 | CaMAD2     | CELL CYCLE AND DNA PROCESSING                                                         | molecular_function unknown          |
| CA1034 | 1.0 | 1.1 | 1.0 | 1.1 | 1.0 | 1.0 | BET4.EXON2   | 4776433..4 alpha subunit of geranylgeranyl tr   | orf19.8641 | 17890 | CaBET4.€   | Lipid fatty-acid and isoprenoid metabolism """"PROTEIN FATE [folding m                | transferase activity                |
| CA1035 | 0.9 | 1.1 | 1.0 | 1.1 | 1.1 | 1.1 | IFI2.3F      | complemer unknown function, 3-prime end         | orf19.1038 | 13751 | CaIFI2.3f  | No significant S.c. match                                                             |                                     |
| CA1037 | 1.0 | 1.1 | 1.0 | 1.0 | 1.0 | 1.0 | MNS1         | complemer Alpha1,2-mannosidase (by homol        | orf19.8638 | 6163  | CaMNS1     | C-compound and carbohydrate metabolism ""PROTEIN FATE [folding m                      | hydrolase activity                  |
| CA1038 | 1.0 | 1.1 | 1.0 | 1.1 | 1.0 | 1.0 | IPF6159      | 4784798..4 unknown function                     | orf19.8637 | 6159  | IPF6159    | TRANSCRIPTION SUBCELLULAR LOCALISATION                                                | DNA binding, transcription regulato |
| CA1039 | 1.1 | 1.0 | 1.0 | 0.9 | 1.0 | 1.0 | IPF4012      | 4791807..4 Unknown Function                     | orf19.2501 | 4012  | IPF4012    | UNCLASSIFIED PROTEINS                                                                 | molecular_function unknown          |
| CA1040 | 1.0 | 0.9 | 0.9 | 1.0 | 1.0 | 0.8 | IPF4010      | complemer unknown function                      | orf19.2503 | 4010  | IPF4010    | No significant S.c. match                                                             |                                     |
| CA1041 | 0.9 | 1.0 | 1.0 | 1.0 | 1.1 | 1.0 | BMS1         | 4795951..4 probable membrane protein involv     | orf19.2504 | 4009  | CaBMS1     | TRANSCRIPTION                                                                         |                                     |
| CA1042 | 1.0 | 1.0 | 1.0 | 1.1 | 1.1 | 1.0 | IPF18784     | 4802829..4 unknown function                     | orf19.2506 | 18784 | IPF18784   | No significant S.c. match                                                             |                                     |
| CA1043 | 1.2 | 1.2 | 1.1 | 1.0 | 1.0 | 1.1 | TOM6         | complemer mitochondrial outer membrane im       | orf19.9219 | 15801 | CaTOM6     | PROTEIN FATE [folding modification destination] ""CELLULAR TRANSP                     | transporter activity                |
| CA1044 | 1.1 | 1.0 | 1.0 | 1.0 | 1.0 | 1.1 | RNA1         | 4804962..4 GTPase activating protein (by hom    | orf19.9218 | 11621 | CaRNA1     | TRANSCRIPTION SUBCELLULAR LOCALISATION                                                | enzyme regulator activity           |
| CA1045 | 1.1 | 1.0 | 1.1 | 1.0 | 0.9 | 1.0 | IPF11620     | 4806328..4 similar to Saccharomyces cerevisi    | orf19.1648 | 11620 | IPF11620   | CELL CYCLE AND DNA PROCESSING SUBCELLULAR LOCALISATION                                | protein binding                     |
| CA1046 | 1.0 | 1.0 | 1.1 | 1.1 | 0.9 | 1.0 | IPF11617     | complemer unknown function                      | orf19.1647 | 11617 | IPF11617   | CELL CYCLE AND DNA PROCESSING CELL FATE                                               | transferase activity                |
| CA1047 | 0.9 | 1.0 | 0.9 | 1.0 | 1.0 | 1.0 | IPF11615     | 4811687..4 RNA-binding proteins (by homolog     | orf19.9215 | 11615 | IPF11615   | CLASSIFICATION NOT YET CLEAR-CUT                                                      | RNA binding                         |
| CA1048 | 1.0 | 1.0 | 1.1 | 1.1 | 1.0 | 1.0 | IPF15394     | complemer unknown function                      | orf19.3899 | 15394 | IPF15394   | UNCLASSIFIED PROTEINS                                                                 | DNA binding                         |
| CA1049 | 1.0 | 1.0 | 0.9 | 1.0 | 1.0 | 1.0 | TLG1         | 4818309..4 tSNARE that affects a Late Golgi     | orf19.3898 | 15393 | CaTLG1     | PROTEIN FATE [folding modification destination] ""CELLULAR TRANSP                     | transporter activity                |
| CA1050 | 1.0 | 1.1 | 1.1 | 1.0 | 1.1 | 0.9 | IPF19897     | complemer unknown function                      | orf19.3897 | 19897 | IPF19897   | No significant S.c. match                                                             |                                     |
| CA1051 | 0.9 | 0.9 | 1.0 | 1.1 | 1.1 | 1.1 | CHT2         | 4824049..4 chitinase 2 precursor                | orf19.3895 | 15860 | CaCHT2     | C-compound and carbohydrate metabolism CELL CYCLE AND DNA PROCESSING SUBCELLULAR LOCA |                                     |
| CA1052 | 1.0 | 1.0 | 1.0 | 1.1 | 1.0 | 0.8 | IPF15861     | 4826085..4 unknown function                     | orf19.3894 | 15861 | IPF15861   | No significant S.c. match                                                             |                                     |
| CA1053 | 1.0 | 1.0 | 1.0 | 1.0 | 0.9 | 1.0 | SCW11.3EOC   | complemer glucanase gene family member, 3-      | orf19.3893 | 15862 | CaSCW11.   | CLASSIFICATION NOT YET CLEAR-CUT                                                      | hydrolase activity                  |

|        |     |     |     |     |     |     |              |                                                             |            |       |           |                                                                                             |                                  |
|--------|-----|-----|-----|-----|-----|-----|--------------|-------------------------------------------------------------|------------|-------|-----------|---------------------------------------------------------------------------------------------|----------------------------------|
| CA1054 | 1.0 | 1.0 | 0.9 | 1.0 | 1.0 | 1.0 | SAS3         | 4831154..4 silencing protein (by homology)                  | orf19.2540 | 16878 | CaSAS3    | TRANSCRIPTION CELL FATE                                                                     | transferase activity             |
| CA1055 | 1.0 | 1.0 | 0.9 | 1.0 | 0.9 | 1.0 | IPF17504     | complemer unknown function                                  | orf19.2541 | 17504 | IPF17504  | UNCLASSIFIED PROTEINS                                                                       | molecular_function unknown       |
| CA1056 | 0.9 | 1.0 | 1.0 | 1.0 | 1.0 | 1.0 | IPF17503     | 4835212..4 protein folding and stabilization (by orf19.2542 | orf19.2542 | 17503 | IPF17503  | PROTEIN FATE [folding modification destination]                                             |                                  |
| CA1057 | 1.0 | 1.0 | 1.0 | 1.0 | 1.0 | 1.0 | IPF17031     | 4836330..4 unknown function                                 | orf19.2544 | 17031 | IPF17031  | UNCLASSIFIED PROTEINS                                                                       | hydrolase activity               |
| CA1058 | 1.0 | 0.9 | 1.1 | 0.9 | 1.0 | 1.0 | DOT6         | complemer involved in derepression of telome orf19.2545     | orf19.2545 | 19898 | CaDOT6    | TRANSCRIPTION SUBCELLULAR LOCALISATION UNCLASSIFIED PF                                      | molecular_function unknown       |
| CA1059 | 1.0 | 1.1 | 1.0 | 0.9 | 1.0 | 1.0 | TRP2         | complemer anthranilate synthase component lorf19.1008       | orf19.1008 | 13684 | CaTRP2    | Amino acid metabolism SUBCELLULAR LOCALISATION                                              | lyase activity                   |
| CA1060 | 1.1 | 1.0 | 1.0 | 1.0 | 1.0 | 1.0 | IPF11460     | complemer unknown function                                  | orf19.267  | 11460 | IPF11460  | TRANSCRIPTION                                                                               | DNA binding                      |
| CA1061 | 1.0 | 1.0 | 1.0 | 0.9 | 0.9 | 1.0 | IPF19720.3EC | 4860128..4 unknown function, 3-prime end                    | orf19.1211 | 19720 | IPF19720  | No significant S.c. match                                                                   |                                  |
| CA1062 | 1.0 | 1.1 | 1.0 | 1.0 | 1.0 | 1.0 | IPF14165     | complemer unknown function                                  | orf19.4642 | 14165 | IPF14165  | No significant S.c. match                                                                   |                                  |
| CA1063 | 0.9 | 1.0 | 1.0 | 1.0 | 0.9 | 1.0 | NMT1         | 4866803..4 N-myristoyltransferase                           | orf19.4641 | 15592 | CaNMT1    | Lipid fatty-acid and isoprenoid metabolism *****PROTEIN FATE [folding m                     | transferase activity             |
| CA1064 | 1.0 | 1.0 | 1.1 | 1.0 | 1.1 | 1.1 | PWP1         | 4868492..4 beta-transducin superfamily (by hcorf19.1211     | orf19.1211 | 15595 | CaPWP1    | UNCLASSIFIED PROTEINS                                                                       | molecular_function unknown       |
| CA1065 | 1.1 | 1.0 | 1.0 | 0.9 | 1.0 | 1.1 | IPF9002      | complemer unknown function                                  | orf19.1210 | 9002  | IPF9002   | No significant S.c. match                                                                   |                                  |
| CA1066 | 1.0 | 1.1 | 1.0 | 1.0 | 1.0 | 1.0 | IPF9001      | 4871411..4 unknown function                                 | orf19.1210 | 9001  | IPF9001   | UNCLASSIFIED PROTEINS                                                                       | molecular_function unknown       |
| CA1067 | 0.7 | 0.9 | 2.1 | 1.5 | 1.3 | 1.8 | HXT62        | 4876157..4 sugar transporter                                | orf19.2023 | 4109  | CaHXT62   | C-compound and carbohydrate metabolism CELLULAR TRANSPORT A                                 | transporter activity             |
| CA1069 | 0.9 | 1.0 | 1.4 | 1.2 | 1.0 | 0.9 | HXT5.3F      | 4880221..4 sugar transporter, 3-prime end                   | orf19.2021 | 18773 | CaHXT5.3F | C-compound and carbohydrate metabolism CELLULAR TRANSPORT AND TRANSPORT MECHANISMS S        |                                  |
| CA1070 | 0.8 | 0.5 | 1.2 | 1.0 | 1.0 | 0.9 | HXT61        | 4881908..4 sugar transporter                                | orf19.2020 | 4104  | CaHXT61   | C-compound and carbohydrate metabolism CELLULAR TRANSPORT A                                 | transporter activity             |
| CA1071 | 1.0 | 1.0 | 1.0 | 1.0 | 1.0 | 1.0 | IPF16624     | complemer unknown function                                  | orf19.2534 | 16624 | IPF16624  | UNCLASSIFIED PROTEINS                                                                       | molecular_function unknown       |
| CA1072 | 0.9 | 1.0 | 1.1 | 1.0 | 1.0 | 0.9 | SBH1         | 4891168..4 involved in translocation into the ER (by homo   | orf19.2533 | 4995  | CaSBH1    | PROTEIN FATE [folding modification destination] ***CELLULAR TRANSP                          | transporter activity             |
| CA1073 | 1.0 | 1.1 | 1.0 | 1.0 | 1.0 | 1.0 | PRORS.3F     | complemer prolyl-tRNA synthetase prolyl-tRNA orf19.2533     | orf19.2533 | 4994  | CaPRORS   | PROTEIN SYNTHESIS                                                                           | ligase activity                  |
| CA1074 | 1.0 | 1.0 | 1.0 | 1.0 | 1.0 | 1.1 | PRORS.5F     | complemer prolyl-tRNA synthetase, 5-prime end orf19.2532    | orf19.2532 | 4992  | CaPRORS   | PROTEIN SYNTHESIS                                                                           |                                  |
| CA1075 | 1.3 | 1.2 | 1.5 | 1.4 | 1.1 | 1.2 | IPF4991      | complemer putative membrane prc putative me orf19.2531      | orf19.2531 | 4991  | IPF4991   | CELLULAR TRANSPORT AND TRANSPORT MECHANISMS SUBCELLULAR LOCALISATION                        |                                  |
| CA1076 | 1.0 | 1.0 | 0.9 | 1.0 | 1.0 | 1.0 | IPF19721     | complemer similar to Saccharomyces cerevisi orf19.2239      | orf19.2239 | 19721 | IPF19721  | CELL CYCLE AND DNA PROCESSING                                                               | enzyme regulator activity        |
| CA1077 | 1.0 | 1.0 | 1.0 | 1.0 | 1.0 | 1.0 | IPF13694     | complemer unknown function                                  | orf19.2238 | 13694 | IPF13694  | CELL CYCLE AND DNA PROCESSING                                                               |                                  |
| CA1078 | 0.9 | 0.9 | 1.0 | 1.0 | 1.0 | 1.0 | SPR1         | complemer exo-1,3-beta-glucanase precursor orf19.2237       | orf19.2237 | 19900 | CaSPR1    | C-compound and carbohydrate metabolism CELL FATE SUBCELLULAR LOCALISATION                   |                                  |
| CA1079 | 1.0 | 1.1 | 1.0 | 1.0 | 1.0 | 0.9 | LIP1         | 4913733..4 Secretory lipase                                 | orf19.4821 | 14712 | CaLIP1    | Other virulence attributes                                                                  |                                  |
| CA1080 | 1.0 | 1.0 | 1.0 | 0.9 | 1.0 | 1.0 | IPF14710     | complemer unknown function                                  | orf19.4820 | 14710 | IPF14710  | UNCLASSIFIED PROTEINS                                                                       | molecular_function unknown       |
| CA1081 | 1.0 | 1.0 | 1.0 | 1.1 | 1.0 | 1.0 | IPF14797.3   | complemer unknown function, 3-prime end                     |            | 14799 | IPF14797  | No significant S.c. match                                                                   |                                  |
| CA1082 | 1.0 | 1.1 | 1.0 | 1.0 | 1.0 | 0.9 | IPF14797     | complemer unknown function                                  | orf19.4818 | 14797 | IPF14797  | No significant S.c. match                                                                   |                                  |
| CA1083 | 1.0 | 1.0 | 1.0 | 1.0 | 1.0 | 1.0 | IPF1034      | complemer Similarity to transcription factors               | orf19.1204 | 1034  | IPF1034   | TRANSCRIPTION                                                                               |                                  |
| CA1084 | 1.2 | 1.2 | 1.0 | 1.0 | 1.1 | 1.0 | IPF1036      | complemer unknown function                                  | orf19.4571 | 1036  | IPF1036   | No significant S.c. match                                                                   |                                  |
| CA1085 | 1.2 | 1.1 | 1.0 | 1.0 | 1.1 | 1.0 | IPF1038      | complemer unknown function                                  | orf19.4570 | 1038  | IPF1038   | No significant S.c. match                                                                   |                                  |
| CA1086 | 1.0 | 1.1 | 1.0 | 1.1 | 1.0 | 1.0 | IPF1039      | 4932510..4 unknown function                                 | orf19.1203 | 1039  | IPF1039   | No significant S.c. match                                                                   |                                  |
| CA1087 | 1.0 | 1.0 | 1.0 | 1.0 | 1.0 | 1.0 | MYO5         | complemer Myosin I (by homology)                            | orf19.8357 | 14461 | CaMYO5    | CELLULAR TRANSPORT AND TRANSPORT MECHANISMS CELL FA1                                        | motor activity                   |
| CA1088 | 1.0 | 1.0 | 1.0 | 1.1 | 1.0 | 1.0 | IPF13319     | complemer unknown function                                  | orf19.740  | 13319 | IPF13319  | TRANSCRIPTION SUBCELLULAR LOCALISATION                                                      |                                  |
| CA1089 | 1.2 | 1.2 | 1.1 | 1.1 | 1.1 | 1.0 | IPF13799     | 4947538..4 unknown function                                 | orf19.3945 | 13799 | IPF13799  | UNCLASSIFIED PROTEINS                                                                       | molecular_function unknown       |
| CA1090 | 1.1 | 1.1 | 1.1 | 1.0 | 1.1 | 1.0 | COX18        | complemer protein required for activity of mito orf19.3946  | orf19.3946 | 13798 | CaCOX18   | ENERGY ***PROTEIN FATE [folding modification destination] ***SUBCELL                        | molecular_function unknown       |
| CA1091 | 1.2 | 1.2 | 0.9 | 1.0 | 1.1 | 1.0 | SPT4         | 4950243..4 transcription elongation protein (by orf19.3947  | orf19.3947 | 13796 | CaSPT4    | CELL CYCLE AND DNA PROCESSING TRANSCRIPTION SUBCELLUL                                       | transcription regulator activity |
| CA1092 | 1.0 | 1.0 | 1.0 | 1.0 | 0.9 | 1.1 | YTA7         | complemer 26S proteasome subunit (by homo orf19.3949        | orf19.3949 | 13795 | CaYTA7    | PROTEIN FATE [folding modification destination] ***SUBCELLULAR LOC                          | hydrolase activity               |
| CA1093 | 1.0 | 0.9 | 1.1 | 1.0 | 1.0 | 1.0 | MSM1         | complemer mitochondrial methionyl-tRNA syn orf19.3950       | orf19.3950 | 19722 | CaMSM1    | PROTEIN SYNTHESIS SUBCELLULAR LOCALISATION                                                  | ligase activity                  |
| CA1094 | 1.0 | 0.9 | 1.0 | 1.0 | 1.0 | 1.0 | YIP1         | complemer golgi membrane protein (by homol orf19.3951       | orf19.3951 | 16770 | CaYIP1    | CELLULAR TRANSPORT AND TRANSPORT MECHANISMS SUBCELL                                         | molecular_function unknown       |
| CA1095 | 1.0 | 1.0 | 1.0 | 1.0 | 1.1 | 1.0 | SMC1         | 4962077..4 Chromosomal ATPase family mem orf19.4367         | orf19.4367 | 7580  | CaSMC1    | CELL CYCLE AND DNA PROCESSING SUBCELLULAR LOCALISATION                                      | DNA binding                      |
| CA1096 | 1.0 | 1.0 | 1.0 | 1.0 | 1.0 | 0.9 | IPF7578      | complemer unknown function                                  | orf19.4366 | 7578  | IPF7578   | No significant S.c. match                                                                   |                                  |
| CA1097 | 1.0 | 1.0 | 1.0 | 1.0 | 1.0 | 1.0 | IPF7575      | 4969468..4 putative endo-exonuclease (by hor orf19.4365     | orf19.4365 | 7575  | IPF7575   | TRANSCRIPTION SUBCELLULAR LOCALISATION                                                      |                                  |
| CA1098 | 1.0 | 0.6 | 1.0 | 0.9 | 1.0 | 1.0 | IPF12316     | complemer unknown function                                  |            | 12316 | IPF12316  | No significant S.c. match                                                                   |                                  |
| CA1099 | 1.0 | 0.9 | 0.9 | 1.1 | 1.0 | 1.0 | IPF12312     | complemer unknown function                                  | orf19.1253 | 12312 | IPF12312  | No significant S.c. match                                                                   |                                  |
| CA1100 | 1.0 | 1.0 | 0.9 | 1.0 | 1.0 | 1.1 | IPF5681      | complemer unknown function                                  | orf19.1241 | 5681  | IPF5681   | No significant S.c. match                                                                   |                                  |
| CA1101 | 1.0 | 0.9 | 0.9 | 1.0 | 1.0 | 0.9 | IPF5678      | complemer Unknown function                                  | orf19.1241 | 5678  | IPF5678   | No significant S.c. match                                                                   |                                  |
| CA1102 | 1.0 | 1.0 | 1.0 | 1.0 | 1.0 | 1.0 | AKR1         | 4994071..4 ankryrin repeat-containing protein t orf19.4950  | orf19.4950 | 5675  | CaAKR1    | REGULATION OF/INTERACTION WITH CELLULAR ENVIRONMENT C                                       | transferase activity             |
| CA1103 | 1.0 | 1.0 | 0.9 | 1.0 | 1.0 | 0.9 | IPF5673      | 4997664..4 similar to Saccharomyces cerevisi orf19.1241     | orf19.1241 | 5673  | IPF5673   | Nucleotide metabolism                                                                       | hydrolase activity               |
| CA1104 | 0.9 | 0.9 | 0.9 | 0.8 | 0.9 | 0.8 | IPF18761     | complemer unknown function                                  |            | 18761 | IPF18761  | UNCLASSIFIED PROTEINS                                                                       | molecular_function unknown       |
| CA1105 | 1.0 | 1.0 | 0.9 | 0.9 | 0.9 | 1.0 | IPF18760.3   | complemer unknown function, 3-prime end                     |            | 18760 | IPF18760  | No significant S.c. match                                                                   |                                  |
| CA1106 | 1.0 | 1.1 | 1.0 | 0.9 | 0.9 | 1.0 | IPF11270     | complemer unknown function                                  | orf19.1269 | 11270 | IPF11270  | UNCLASSIFIED PROTEINS                                                                       | RNA binding                      |
| CA1107 | 1.0 | 1.0 | 1.0 | 1.0 | 0.9 | 1.0 | IPF11271     | complemer by homology to S. cerevisiae: ATP19 subun         | orf19.1269 | 11271 | IPF11271  | ENERGY CELLULAR TRANSPORT AND TRANSPORT MECHANISMS                                          | transporter activity             |
| CA1108 | 1.1 | 1.0 | 0.9 | 0.9 | 0.9 | 0.9 | IPF11273     | 5006572..5 unknown function                                 | orf19.1269 | 11273 | IPF11273  | No significant S.c. match                                                                   |                                  |
| CA1109 | 1.1 | 1.1 | 1.0 | 1.0 | 0.9 | 1.0 | MRPS9        | complemer ribosomal protein S9 small subunit orf19.5230     | orf19.5230 | 11274 | CaMRPS9   | PROTEIN SYNTHESIS SUBCELLULAR LOCALISATION                                                  | structural molecule activity     |
| CA1110 | 1.0 | 1.0 | 1.0 | 1.1 | 1.0 | 1.0 | DIS3         | 5009476..53 --5 exoribonuclease required for orf19.5229     | orf19.5229 | 10406 | CaDIS3    | CELL CYCLE AND DNA PROCESSING TRANSCRIPTION SUBCELLUL                                       | RNA binding                      |
| CA1111 | 1.0 | 0.8 | 1.5 | 1.5 | 1.3 | 1.2 | RIB3         | complemer 3,4-dihydroxy-2-butanone 4-phosph orf19.1269      | orf19.1269 | 10407 | CaRIB3    | Metabolism of vitamins cofactors and prosthetic groups                                      |                                  |
| CA1112 | 1.1 | 1.0 | 1.0 | 1.0 | 0.9 | 0.9 | IPF18758.5EC | complemer unknown function, 5-prime end                     | orf19.2282 | 18758 | IPF18758  | No significant S.c. match                                                                   |                                  |
| CA1113 | 0.9 | 1.0 | 1.0 | 1.0 | 1.0 | 1.0 | IPF9996      | 5018610..5 unknown function                                 | orf19.2285 | 9996  | IPF9996   | C-compound and carbohydrate metabolism                                                      |                                  |
| CA1114 | 1.0 | 1.0 | 1.0 | 1.0 | 1.1 | 1.0 | IPF9995      | 5020524..5 unknown function                                 | orf19.2286 | 9995  | IPF9995   | UNCLASSIFIED PROTEINS                                                                       | molecular_function unknown       |
| CA1115 | 0.9 | 1.0 | 1.0 | 1.0 | 1.0 | 1.0 | RPA12        | complemer DNA-directed RNA polymerase I (lorf19.2287        | orf19.2287 | 9993  | CaRPA12   | TRANSCRIPTION SUBCELLULAR LOCALISATION                                                      | nucleotidyltransferase activity  |
| CA1116 | 1.0 | 1.0 | 1.0 | 0.9 | 0.9 | 1.0 | CCT5         | 5022582..5 T-complex protein 1, epsilon subu orf19.2288     | orf19.2288 | 9991  | CaCCT5    | PROTEIN FATE [folding modification destination] ***SUBCELLULAR LOC                          | chaperone activity               |
| CA1117 | 1.0 | 1.1 | 1.0 | 0.9 | 1.0 | 1.1 | ARP3         | 5024605..5 actin related protein (by homology orf19.2289    | orf19.2289 | 9988  | CaARP3    | CELLULAR TRANSPORT AND TRANSPORT MECHANISMS SUBCELL                                         | structural molecule activity     |
| CA1118 | 1.0 | 1.0 | 0.9 | 1.0 | 0.9 | 1.0 | IPF9987      | 5026113..5 similar to phosphatidylinositol kina orf19.2290  | orf19.2290 | 9987  | IPF9987   | Lipid fatty-acid and isoprenoid metabolism ***CELL CYCLE AND DNA PROCESSING CELLULAR COMMUN |                                  |
| CA1119 | 1.0 | 1.0 | 1.1 | 1.0 | 0.9 | 1.0 | IPF7669.3    | 5028852..5 unknown function, 3-prime end                    |            | 7669  | IPF7669   | UNCLASSIFIED PROTEINS                                                                       |                                  |
| CA1120 | 1.0 | 0.7 | 1.1 | 1.1 | 1.1 | 1.2 | IPF7666      | complemer unknown function                                  | orf19.4056 | 7666  | IPF7666   | UNCLASSIFIED PROTEINS                                                                       |                                  |
| CA1121 | 0.9 | 0.9 | 1.1 | 1.0 | 1.1 | 1.1 | IPF6730      | complemer Unknown function                                  | orf19.1604 | 6730  | IPF6730   | UNCLASSIFIED PROTEINS                                                                       | molecular_function unknown       |
| CA1122 | 1.0 | 1.0 | 0.8 | 1.0 | 1.0 | 1.0 | PMS1.3       | complemer DNA mismatch repair protein, 3-pr orf19.1605      | orf19.1605 | 6724  | CaPMS1.3  | CELL CYCLE AND DNA PROCESSING SUBCELLULAR LOCALISATION                                      | DNA binding                      |
| CA1123 | 1.0 | 1.0 | 1.0 | 1.0 | 1.1 | 1.1 | IPF19723     | complemer similar to Saccharomyces cerevisi orf19.6261      | orf19.6261 | 19723 | IPF19723  | CELLULAR TRANSPORT AND TRANSPORT MECHANISMS                                                 | molecular_function unknown       |
| CA1124 | 0.9 | 1.0 | 1.0 | 1.1 | 1.0 | 1.0 | UBP12        | complemer ubiquitin C-terminal hydrolase (by orf19.6260     | orf19.6260 | 12859 | CaUBP12   | PROTEIN FATE [folding modification destination]                                             | peptidase activity               |
| CA1125 | 1.0 | 1.0 | 1.0 | 1.1 | 1.0 | 1.0 | RRP43        | complemer rRNA processing protein (by homc orf19.6259       | orf19.6259 | 12854 | CaRRP43   | TRANSCRIPTION                                                                               | RNA binding                      |
| CA1126 | 1.1 | 1.0 | 1.1 | 1.0 | 1.0 | 1.0 | ECM18.3EOC   | 5081283..5 cell wall biogenesis, 3-prime end ( orf19.3607   | orf19.3607 | 5203  | CaECM18   | UNCLASSIFIED PROTEINS                                                                       |                                  |

|        |     |     |     |     |     |     |              |                                                                      |                  |                                                                                                                        |                                  |
|--------|-----|-----|-----|-----|-----|-----|--------------|----------------------------------------------------------------------|------------------|------------------------------------------------------------------------------------------------------------------------|----------------------------------|
| CA1127 | 0.9 | 1.0 | 1.0 | 1.1 | 1.0 | 1.0 | MSH3         | complemer DNA mismatch repair by homology orf19.3608                 | 5201 CaMSH3      | CELL CYCLE AND DNA PROCESSING SUBCELLULAR LOCALISATION                                                                 | DNA binding                      |
| CA1128 | 0.9 | 1.0 | 1.0 | 1.0 | 0.9 | 1.1 | IPF5198      | 5086718..5 unknown function orf19.3609                               | 5198 IPF5198     | UNCLASSIFIED PROTEINS                                                                                                  | RNA binding                      |
| CA1129 | 1.0 | 1.0 | 1.0 | 1.0 | 1.0 | 1.0 | IPF5197      | 5088566..5 unknown function orf19.3610                               | 5197 IPF5197     | No significant S.c. match                                                                                              |                                  |
| CA1130 | 1.0 | 1.0 | 1.0 | 0.9 | 0.9 | 0.6 | NAG1         | complemer Glucosamine-6-phosphat orf19.9703                          | 2719 CaNAG1      | No significant S.c. match                                                                                              |                                  |
| CA1131 | 0.8 | 0.9 | 1.0 | 1.0 | 1.0 | 0.9 | NAG2         | 5093929..5 N-acetyl-glucosamine-1-phosphat orf19.9704                | 20073 CaNAG2     | No significant S.c. match                                                                                              |                                  |
| CA1132 | 1.0 | 1.0 | 1.0 | 1.0 | 1.1 | 0.9 | IPF2710.REP1 | complemer putative permease (by CaNAG3) orf19.9705                   | 2717 IPF2710.re  | CELL RESCUE DEFENSE AND VIRULENCE ""TRANSPORT FACILITATION                                                             |                                  |
| CA1133 | 0.9 | 0.9 | 0.9 | 1.0 | 1.0 | 1.0 | IPF2710.REP1 | complemer putative permease (by CaNAG4) orf19.9706                   | 2710 IPF2710.re  | CELL RESCUE DEFENSE AND VIRULENCE ""TRANSPORT FACILITATION                                                             |                                  |
| CA1134 | 1.0 | 1.0 | 1.0 | 1.0 | 1.0 | 1.0 | IPF2702      | 5100522..5 unknown function orf19.2163                               | 2702 IPF2702     | UNCLASSIFIED PROTEINS                                                                                                  | molecular_function unknown       |
| CA1135 | 1.0 | 1.0 | 1.1 | 1.0 | 1.1 | 0.9 | IMP2         | 5107351..5 mitochondrial inner membrane protein orf19.1981           | 8699 CalIMP2     | CELL CYCLE AND DNA PROCESSING ""PROTEIN FATE [folding modification] peptidase activity                                 |                                  |
| CA1136 | 1.0 | 1.1 | 1.0 | 1.1 | 1.0 | 1.0 | IFN2         | complemer glycerophosphoinositol transporter orf19.1980              | 8698 CalFN2      | Lipid fatty-acid and isoprenoid metabolism ""SUBCELLULAR LOCALISATION TRANSPORT FACILITATION                           |                                  |
| CA1137 | 1.0 | 1.1 | 0.9 | 1.0 | 1.0 | 1.0 | IFN1         | complemer glycerophosphoinositol transporter orf19.1979              | 8694 CalFN1      | Lipid fatty-acid and isoprenoid metabolism ""SUBCELLULAR LOCALISATION TRANSPORT FACILITATION                           |                                  |
| CA1138 | 1.1 | 1.1 | 0.9 | 1.0 | 0.9 | 1.1 | IFN3         | complemer glycerophosphoinositol transporter orf19.1978              | 8692 CalFN3      | Lipid fatty-acid and isoprenoid metabolism ""SUBCELLULAR LOCALISATION TRANSPORT FACILITATION                           |                                  |
| CA1139 | 1.0 | 1.1 | 1.0 | 1.1 | 1.1 | 0.9 | IPF9466      | complemer unknown function orf19.4066                                | 9466 IPF9466     | PROTEIN FATE [folding modification destination] ""CELLULAR TRANSPORT AND TRANSPORT MECHANISMS SUBCELLULAR LOCALISATION |                                  |
| CA1140 | 1.0 | 0.9 | 1.0 | 1.0 | 1.1 | 1.0 | IPF17322.3F  | complemer unknown function, 3-prime end orf19.4068                   | 9462 IPF17322.3  | C-compound and carbohydrate metabolism TRANSCRIPTION CELL FATE SUBCELLULAR LOCALISATION                                |                                  |
| CA1141 | 1.0 | 1.0 | 1.0 | 1.1 | 1.0 | 1.0 | IPF17322.5F  | complemer unknown function, 5-prime end orf19.4069                   | 9461 IPF17322.5  | No significant S.c. match                                                                                              |                                  |
| CA1142 | 1.0 | 1.0 | 1.0 | 1.0 | 1.0 | 0.9 | IPF9459      | complemer unknown function orf19.4070                                | 9459 IPF9459     | No significant S.c. match                                                                                              |                                  |
| CA1144 | 1.0 | 1.0 | 1.0 | 1.0 | 1.0 | 1.0 | SPS19        | 5135926..5 peroxisomal 2,4-dienoyl-CoA reductase orf19.1116          | 19650 CaSPS19    | ENERGY SUBCELLULAR LOCALISATION                                                                                        | oxidoreductase activity          |
| CA1145 | 1.1 | 1.0 | 1.0 | 1.0 | 1.0 | 1.0 | GCS1         | 5137053..5 ADP-ribosylation factor GTPase-activator orf19.1116       | 10382 CaGCS1     | CELL CYCLE AND DNA PROCESSING CELLULAR TRANSPORT AND TRANSPORT MECHANISMS SUBCELLULAR LOCALISATION                     |                                  |
| CA1146 | 1.0 | 1.0 | 1.0 | 1.0 | 1.0 | 1.0 | CWH8         | complemer putative required protein for full levoglucosan orf19.3682 | 10381 CaCWH8     | PROTEIN FATE [folding modification destination] ""CONTROL OF CELL HYDROLASE ACTIVITY                                   |                                  |
| CA1147 | 1.0 | 1.0 | 1.0 | 1.0 | 1.0 | 0.9 | KAP95        | complemer karyopherin-beta protein (by homology) orf19.1116          | 10376 CaKAP95    | PROTEIN FATE [folding modification destination] ""CELLULAR TRANSPORT FACILITATION                                      |                                  |
| CA1148 | 0.9 | 1.0 | 1.0 | 0.9 | 0.9 | 0.9 | CAN1         | 5149963..5 amino acid permease (basic amino acid) orf19.97           | 10466 CaCAN1     | Amino acid metabolism CELLULAR TRANSPORT AND TRANSPORT MECHANISMS SUBCELLULAR LOCALISATION                             |                                  |
| CA1149 | 1.1 | 1.0 | 1.1 | 1.0 | 1.0 | 1.0 | MET223       | complemer protein ser/thr phosphatase (by homology) orf19.99         | 10464 CaMET223   | Amino acid metabolism ""CELL RESCUE DEFENSE AND VIRULENCE ""                                                           |                                  |
| CA1150 | 0.8 | 0.9 | 1.1 | 1.1 | 1.0 | 1.0 | RIM9         | 5154830..5 regulator for sporulation and invasion orf19.101          | 10461 CaRIM9     | CELL FATE                                                                                                              |                                  |
| CA1151 | 0.9 | 1.0 | 1.0 | 0.9 | 0.9 | 1.0 | IPF10459     | complemer unknown function orf19.102                                 | 10459 IPF10459   | CELL CYCLE AND DNA PROCESSING SUBCELLULAR LOCALISATION                                                                 |                                  |
| CA1152 | 1.0 | 1.0 | 1.1 | 1.0 | 0.9 | 1.0 | IPF10457     | 5157592..5 nuclear fusion protein-like (by homology) orf19.103       | 10457 IPF10457   | CELL FATE SUBCELLULAR LOCALISATION                                                                                     |                                  |
| CA1153 | 1.0 | 1.0 | 1.0 | 1.0 | 1.0 | 1.0 | IPF10455     | 5158194..5 unknown function orf19.104                                | 10455 IPF10455   | CELL CYCLE AND DNA PROCESSING                                                                                          |                                  |
| CA1154 | 1.1 | 1.0 | 1.1 | 1.0 | 1.0 | 1.0 | MET221       | 5159447..5 protein ser/thr phosphatase (by homology) orf19.105       | 10454 CaMET221   | Amino acid metabolism ""CELL RESCUE DEFENSE AND VIRULENCE ""                                                           | hydrolase activity               |
| CA1155 | 0.9 | 1.0 | 1.0 | 1.1 | 1.0 | 1.1 | JA2          | complemer ATP-dependent RNA helicases-like orf19.107                 | 10452 CaJA2      | TRANSCRIPTION                                                                                                          | RNA binding, helicase activity   |
| CA1156 | 1.1 | 1.1 | 1.1 | 1.1 | 1.1 | 1.0 | RLR1         | 5165198..5 hypothetical regulatory protein (by homology) orf19.4123  | 10133 CaRLR1     | TRANSCRIPTION PROTEIN SYNTHESIS                                                                                        |                                  |
| CA1157 | 1.0 | 1.0 | 1.0 | 1.0 | 1.0 | 1.0 | PZF1         | complemer TFIIIA (transcription initiation factor) orf19.4125        | 13278 CaPZF1     | TRANSCRIPTION SUBCELLULAR LOCALISATION                                                                                 | transcription regulator activity |
| CA1158 | 1.1 | 1.0 | 0.9 | 1.0 | 1.0 | 1.0 | IPF13275     | 5172792..5 unknown function orf19.4127                               | 13275 IPF13275   | SUBCELLULAR LOCALISATION                                                                                               | molecular_function unknown       |
| CA1159 | 1.1 | 1.0 | 1.0 | 1.0 | 1.0 | 1.0 | IPF13423     | complemer unknown function orf19.4128                                | 13423 IPF13423   | UNCLASSIFIED PROTEINS                                                                                                  |                                  |
| CA1160 | 1.0 | 1.1 | 1.0 | 1.0 | 1.0 | 1.0 | IPF10262     | 5182142..5 unknown function orf19.2726                               | 10262 IPF10262   | UNCLASSIFIED PROTEINS                                                                                                  | molecular_function unknown       |
| CA1161 | 1.0 | 1.0 | 1.0 | 1.0 | 0.9 | 1.0 | GRX3         | 5183340..5 glutaredoxin-like protein orf19.2727                      | 10259 CaGRX3     | PROTEIN FATE [folding modification destination] ""CELL RESCUE DEFENSE AND VIRULENCE ""                                 | oxidoreductase activity          |
| CA1162 | 1.1 | 1.0 | 1.0 | 0.9 | 1.0 | 1.0 | IPF10258     | complemer similar to Saccharomyces cerevisiae orf19.2728             | 10258 IPF10258   | CELL CYCLE AND DNA PROCESSING                                                                                          | DNA binding                      |
| CA1163 | 0.9 | 1.0 | 1.0 | 1.0 | 1.1 | 1.0 | IPF15357     | complemer unknown function orf19.2730                                | 20076 IPF15357   | TRANSCRIPTION                                                                                                          | transcription regulator activity |
| CA1164 | 1.1 | 1.0 | 1.0 | 1.0 | 1.1 | 1.0 | ARP8         | 5191111..5 actin-related protein (by homology) orf19.1086            | 14479 CaARP8     | SUBCELLULAR LOCALISATION                                                                                               | molecular_function unknown       |
| CA1165 | 0.9 | 0.9 | 1.1 | 1.2 | 1.0 | 1.0 | IPF19902     | 5196466..5 unknown function orf19.1086                               | 19902 IPF19902   | No significant S.c. match                                                                                              |                                  |
| CA1166 | 1.0 | 0.9 | 1.0 | 0.9 | 1.0 | 0.9 | IFO1         | 5204897..5 Unknown function orf19.1780                               | 16648 CalFO1     | UNCLASSIFIED PROTEINS                                                                                                  |                                  |
| CA1167 | 1.0 | 1.1 | 1.0 | 1.0 | 1.0 | 0.9 | IPF16646     | 5206503..5 unknown function orf19.1782                               | 16646 IPF16646   | UNCLASSIFIED PROTEINS                                                                                                  | molecular_function unknown       |
| CA1168 | 0.7 | 0.7 | 0.8 | 0.8 | 0.9 | 0.7 | IPF13017     | complemer unknown function orf19.1785                                | 13017 IPF13017   | No significant S.c. match                                                                                              |                                  |
| CA1169 | 1.0 | 0.9 | 0.9 | 1.1 | 1.0 | 0.9 | IPF16120.3EC | 5217924..5 unknown function, 3-prime end orf19.2751                  | 13270 IPF16120.3 | TRANSPORT FACILITATION                                                                                                 |                                  |
| CA1170 | 0.9 | 0.9 | 1.0 | 1.1 | 1.1 | 1.0 | IPF13268     | complemer unknown function orf19.2749                                | 13268 IPF13268   | UNCLASSIFIED PROTEINS                                                                                                  | molecular_function unknown       |
| CA1171 | 1.0 | 1.0 | 1.0 | 0.9 | 1.0 | 1.0 | IPF13264     | 5222162..5 zinc-finger transcription factor of the orf19.2748        | 13264 IPF13264   | Amino acid metabolism Nitrogen and sulphur metabolism TRANSCRIPTION SUBCELLULAR LOCALISATION                           |                                  |
| CA1172 | 1.0 | 1.1 | 1.0 | 1.1 | 1.1 | 1.2 | RGT1         | 5228722..5 Regulator of glucose-induced genes orf19.2747             | 14445 CaRGT1     | C-compound and carbohydrate metabolism TRANSCRIPTION SUBCELLULAR LOCALISATION                                          | DNA binding                      |
| CA1173 | 1.0 | 1.0 | 1.1 | 1.0 | 1.0 | 1.0 | IPF14254     | complemer unknown function orf19.4768                                | 14254 IPF14254   | No significant S.c. match                                                                                              |                                  |
| CA1174 | 0.9 | 1.0 | 1.1 | 1.0 | 1.0 | 0.9 | IPF14255     | complemer unknown function orf19.4767                                | 14255 IPF14255   | TRANSCRIPTION                                                                                                          |                                  |
| CA1175 | 1.2 | 1.2 | 1.0 | 1.1 | 1.0 | 0.9 | ARG81        | 5242145..5 transcription factor possibly involved in orf19.4766      | 14033 CaARG81    | Amino acid metabolism Nitrogen and sulphur metabolism TRANSCRIPTION TRANSCRIPTION FACILITATION                         | transcription regulator activity |
| CA1176 | 1.0 | 1.0 | 1.0 | 1.1 | 1.1 | 1.1 | CHS5         | 5250988..5 Chitin biosynthesis protein Chs5p [Ca] orf19.807          | 5058 CaCHS5      | C-compound and carbohydrate metabolism CELL FATE SUBCELLULAR LOCALISATION                                              | molecular_function unknown       |
| CA1177 | 1.0 | 1.0 | 1.1 | 1.1 | 1.1 | 1.0 | VMA7         | complemer vacuolar ATPase (by homology) orf19.806                    | 5061 CaVMA7      | CELLULAR TRANSPORT AND TRANSPORT MECHANISMS SUBCELLULAR LOCALISATION                                                   | transporter activity             |
| CA1178 | 1.0 | 0.9 | 0.9 | 1.0 | 1.0 | 1.0 | IPF5062      | 5253582..5 unknown function orf19.805                                | 5062 IPF5062     | UNCLASSIFIED PROTEINS                                                                                                  | molecular_function unknown       |
| CA1179 | 1.0 | 1.0 | 0.9 | 0.9 | 1.0 | 1.0 | IPF5064      | complemer ADP/ATP carrier protein (by homology) orf19.804            | 5064 IPF5064     | Nucleotide metabolism CELLULAR TRANSPORT AND TRANSPORT MECHANISMS SUBCELLULAR LOCALISATION                             | transporter activity             |
| CA1180 | 0.9 | 0.9 | 1.0 | 1.0 | 1.0 | 1.1 | UGA12.3F     | complemer 4-aminobutyrate aminotransferase orf19.803                 | 19652 CaUGA12    | Amino acid metabolism Nitrogen and sulphur metabolism                                                                  |                                  |
| CA1181 | 1.2 | 1.2 | 1.0 | 1.1 | 1.0 | 1.0 | UGA12.5F     | complemer 4-aminobutyrate aminotransferase orf19.802                 | 19651 CaUGA12    | Amino acid metabolism Nitrogen and sulphur metabolism                                                                  |                                  |
| CA1182 | 1.0 | 1.0 | 1.1 | 1.1 | 1.1 | 1.0 | IPF19724     | 5258815..5 similar to Saccharomyces cerevisiae orf19.801             | 19724 IPF19724   | SUBCELLULAR LOCALISATION                                                                                               | DNA binding                      |
| CA1183 | 1.0 | 1.0 | 0.9 | 0.9 | 1.0 | 1.0 | IPF14805     | complemer acetyl-coenzyme A transporter (by homology) orf19.1126     | 14805 IPF14805   | UNCLASSIFIED PROTEINS                                                                                                  | molecular_function unknown       |
| CA1184 | 1.0 | 1.0 | 1.0 | 1.0 | 0.9 | 1.0 | IPF14802     | 5268529..5 unknown function orf19.1126                               | 14802 IPF14802   | UNCLASSIFIED PROTEINS                                                                                                  | molecular_function unknown       |
| CA1185 | 0.9 | 1.0 | 1.0 | 0.8 | 1.0 | 1.0 | IPF19903     | complemer unknown function orf19.1126                                | 19903 IPF19903   | No significant S.c. match                                                                                              |                                  |
| CA1186 | 1.0 | 1.0 | 1.0 | 1.0 | 1.0 | 1.0 | IPF6930      | 5272287..5 unknown function orf19.3785                               | 6930 IPF6930     | PROTEIN FATE [folding modification destination]                                                                        |                                  |
| CA1187 | 1.0 | 0.9 | 1.0 | 1.0 | 0.9 | 1.0 | QRI7         | complemer putative glycoprotease (by homology) orf19.1126            | 19904 CaQRI7     | PROTEIN FATE [folding modification destination]                                                                        | molecular_function unknown       |
| CA1188 | 1.0 | 1.0 | 0.9 | 1.0 | 1.0 | 1.2 | RPL30.3      | complemer RNA binding, 3-prime end (by homology) orf19.1126          | 6920 CaRPL30.3   | PROTEIN SYNTHESIS SUBCELLULAR LOCALISATION                                                                             | structural molecule activity     |
| CA1189 | 1.0 | 1.0 | 1.0 | 0.9 | 1.0 | 1.1 | RPL24A       | 5276914..5 ribosomal protein L24 (by homology) orf19.1126            | 18743 CaRPL24A   | PROTEIN SYNTHESIS SUBCELLULAR LOCALISATION                                                                             | RNA binding                      |
| CA1190 | 1.1 | 1.0 | 1.1 | 1.1 | 1.1 | 1.2 | CIP1         | 5280520..5 Cadmium induced protein (by homology) orf19.7761          | 11929 CaCIP1     | No significant S.c. match                                                                                              |                                  |
| CA1191 | 1.2 | 1.6 | 1.0 | 1.0 | 1.0 | 1.0 | CAN2         | 5283094..5 amino acid permease (by homology) orf19.111               | 11927 CaCAN2     | Amino acid metabolism CELLULAR TRANSPORT AND TRANSPORT MECHANISMS SUBCELLULAR LOCALISATION                             | transporter activity             |
| CA1192 | 1.0 | 1.1 | 1.0 | 1.0 | 1.1 | 1.0 | IPF11926     | complemer unknown function orf19.111                                 | 11926 IPF11926   | No significant S.c. match                                                                                              |                                  |
| CA1193 | 1.0 | 0.9 | 1.0 | 1.0 | 0.9 | 1.1 | MSY1         | complemer tyrosyl-tRNA synthetase 8 by homology orf19.7756           | 11923 CaMSY1     | PROTEIN SYNTHESIS SUBCELLULAR LOCALISATION                                                                             | ligase activity                  |
| CA1194 | 1.0 | 1.0 | 1.1 | 1.0 | 1.0 | 1.0 | MET222       | complemer protein ser/thr phosphatase (by homology) orf19.7752       | 17216 CaMET222   | Amino acid metabolism ""CELL RESCUE DEFENSE AND VIRULENCE ""                                                           |                                  |
| CA1195 | 0.9 | 1.0 | 0.9 | 1.1 | 1.0 | 0.9 | KAR5         | complemer nuclear fusion protein-like (by homology) orf19.7750       | 17213 CaKAR5     | CELL FATE SUBCELLULAR LOCALISATION                                                                                     | molecular_function unknown       |
| CA1196 | 1.0 | 1.0 | 1.0 | 1.0 | 1.1 | 1.1 | IPF10394     | complemer unknown function orf19.1087                                | 10394 IPF10394   | No significant S.c. match                                                                                              |                                  |
| CA1197 | 1.1 | 1.1 | 1.0 | 1.0 | 1.0 | 1.1 | IFG1         | complemer probable d-amino acid oxidase (by homology) orf19.1087     | 10395 CalFG1     | No significant S.c. match                                                                                              |                                  |
| CA1198 | 1.0 | 0.9 | 1.0 | 1.0 | 0.9 | 1.0 | IPF10399     | 5299982..5 unknown function orf19.1087                               | 10399 IPF10399   | UNCLASSIFIED PROTEINS                                                                                                  | structural molecule activity     |
| CA1199 | 1.1 | 0.9 | 1.1 | 0.9 | 1.0 | 1.0 | IPF10404     | 5304747..5 unknown function orf19.1087                               | 10404 IPF10404   | UNCLASSIFIED PROTEINS                                                                                                  | molecular_function unknown       |

|        |     |     |     |     |     |     |             |                                                          |            |                |                                                                                           |                                        |
|--------|-----|-----|-----|-----|-----|-----|-------------|----------------------------------------------------------|------------|----------------|-------------------------------------------------------------------------------------------|----------------------------------------|
| CA1200 | 1.1 | 1.0 | 1.0 | 1.0 | 0.9 | 1.0 | IPF10223    | complemer putative serine/threonine kinase               | orf19.1233 | 10223 IPF10223 | CELL CYCLE AND DNA PROCESSING                                                             | protein kinase activity                |
| CA1201 | 0.9 | 0.9 | 0.9 | 1.0 | 1.0 | 1.0 | IPF19906    | 5315004..5 unknown function                              | orf19.4869 | 19906 IPF19906 | Nitrogen and sulphur metabolism                                                           | TRANSCRIPTION SUBCELLULAR LOCALISATION |
| CA1202 | 1.0 | 1.1 | 1.0 | 1.0 | 1.0 | 1.1 | DBP3        | 5316825..5 ATP-dependent RNA helicase (HE                | orf19.1233 | 10215 CaDBP3   | TRANSCRIPTION SUBCELLULAR LOCALISATION                                                    | RNA binding,helicase activity          |
| CA1203 | 0.9 | 1.0 | 1.0 | 1.0 | 0.9 | 0.9 | IPF3937     | complemer Unknown function                               | orf19.8487 | 3937 IPF3937   | No significant S.c. match                                                                 |                                        |
| CA1204 | 0.9 | 1.0 | 1.0 | 0.9 | 1.0 | 1.0 | IPF14524    | 5328163..5 unknown function                              | orf19.8486 | 14524 IPF14524 | REGULATION OF INTERACTION WITH CELLULAR ENVIRONMENT                                       | oxidoreductase activity                |
| CA1205 | 1.0 | 1.2 | 1.0 | 0.9 | 1.0 | 1.0 | SSK2        | complemer MAP kinase kinase kinase of the                | orf19.1125 | 13431 CaSSK2   | CELL RESCUE DEFENSE AND VIRULENCE ""REGULATION OF/INTE                                    | protein kinase activity,signal trans   |
| CA1206 | 1.0 | 0.9 | 1.0 | 1.1 | 0.9 | 1.1 | HUB1        | 5339823..5 Ubiquitin-like modifier (by homology)         |            | 15404 CaHUB1   | UNCLASSIFIED PROTEINS                                                                     |                                        |
| CA1207 | 1.0 | 0.9 | 1.0 | 0.9 | 0.9 | 1.0 | PPG1        | complemer Phosphoprotein phosphatase PPC                 | orf19.1125 | 18739 CaPPG1   | ENERGY                                                                                    | protein phosphatase activity           |
| CA1208 | 0.9 | 1.0 | 0.9 | 1.1 | 1.0 | 1.0 | IPF17195    | 5342795..5 unknown function                              | orf19.1125 | 17195 IPF17195 | TRANSCRIPTION SUBCELLULAR LOCALISATION                                                    |                                        |
| CA1209 | 0.9 | 1.0 | 1.0 | 1.0 | 1.0 | 1.2 | ARG8        | complemer acetylornithine aminotransferase (             | orf19.1125 | 13486 CaARG8   | Amino acid metabolism                                                                     | SUBCELLULAR LOCALISATION               |
| CA1210 | 0.9 | 0.9 | 1.0 | 1.0 | 1.1 | 1.1 | IPF7030     | 5350146..5 unknown function                              | orf19.7778 | 7030 IPF7030   | TRANSCRIPTION ""CELL RESCUE DEFENSE AND VIRULENCE ""SUE                                   | hydrolase activity                     |
| CA1211 | 1.0 | 1.0 | 1.0 | 1.0 | 1.0 | 1.0 | IPF7031.3   | complemer unknown function, 3-prime end                  |            | 7031 IPF7031.3 | UNCLASSIFIED PROTEINS                                                                     | molecular_function unknown             |
| CA1212 | 0.9 | 0.9 | 1.0 | 1.1 | 1.0 | 0.9 | IPF7033     | complemer unknown function                               | orf19.7777 | 7033 IPF7033   | TRANSCRIPTION SUBCELLULAR LOCALISATION                                                    | RNA binding                            |
| CA1213 | 0.9 | 0.9 | 1.0 | 0.9 | 0.9 | 0.9 | VPS15.5F    | 5353439..5 serine/threonine protein kinase, 5-           | orf19.7776 | 7035 CaVPS15.5 | PROTEIN FATE [folding modification destination] ""CELLULAR TRANSP                         | protein kinase activity                |
| CA1214 | 1.0 | 0.9 | 1.0 | 1.0 | 1.0 | 1.1 | VPS15.53F   | 5355345..5 serine/threonine protein kinase, int          | orf19.129  | 7038 CaVPS15.5 | PROTEIN FATE [folding modification destination] ""CELLULAR TRANSPORT AND TRANSPORT MECHAN |                                        |
| CA1215 | 1.0 | 1.0 | 1.1 | 1.1 | 1.0 | 1.1 | VPS15.3F    | 5356875..5 serine/threonine protein kinase, 3-           | orf19.7773 | 7041 CaVPS15.3 | PROTEIN FATE [folding modification destination] ""CELLULAR TRANSPORT AND TRANSPORT MECHAN |                                        |
| CA1216 | 0.9 | 1.0 | 1.0 | 0.9 | 1.0 | 1.0 | EBP1        | 5359651..5 NADPH dehydrogenas estrog                     | orf19.7772 | 7044 CaEBP1    | ENERGY                                                                                    |                                        |
| CA1217 | 1.0 | 1.0 | 1.0 | 1.0 | 0.9 | 1.0 | IPF13909    | complemer Unknown function                               | orf19.7770 | 13909 IPF13909 | No significant S.c. match                                                                 |                                        |
| CA1218 | 1.0 | 1.1 | 1.0 | 1.0 | 1.1 | 1.0 | CDC20       | complemer anaphase promoting complex subor               | orf19.7769 | 13908 CaCDC20  | CELL CYCLE AND DNA PROCESSING ""PROTEIN FATE [folding modif                               | enzyme regulator activity              |
| CA1219 | 1.0 | 1.0 | 0.9 | 1.1 | 1.0 | 1.2 | PRC2        | complemer carboxypeptidase y precursor , se              | orf19.4135 | 14986 CaPRC2   | PROTEIN FATE [folding modification destination] ""SUBCELLULAR LOCALISATION                |                                        |
| CA1220 | 1.0 | 1.0 | 1.0 | 1.0 | 0.9 | 1.0 | IPF14985    | 5372398..5 unknown function                              | orf19.4134 | 14985 IPF14985 | UNCLASSIFIED PROTEINS                                                                     | molecular_function unknown             |
| CA1221 | 1.0 | 1.0 | 1.0 | 1.0 | 1.0 | 1.0 | IPF14872    | 5373766..5 unknown function                              | orf19.4133 | 14872 IPF14872 | UNCLASSIFIED PROTEINS                                                                     | molecular_function unknown             |
| CA1222 | 1.0 | 1.0 | 0.9 | 1.1 | 1.0 | 1.0 | IPF14871    | complemer unknown function                               | orf19.4132 | 14871 IPF14871 | No significant S.c. match                                                                 |                                        |
| CA1223 | 1.0 | 1.1 | 1.0 | 1.0 | 1.0 | 0.9 | IPF14870    | 5376671..5 unknown function                              | orf19.4131 | 14870 IPF14870 | UNCLASSIFIED PROTEINS                                                                     | molecular_function unknown             |
| CA1224 | 1.0 | 0.9 | 1.0 | 0.9 | 1.0 | 1.1 | IPF15662    | complemer unknown function                               | orf19.4156 | 15662 IPF15662 | No significant S.c. match                                                                 |                                        |
| CA1225 | 1.1 | 1.1 | 0.9 | 1.0 | 1.0 | 1.0 | SPS20       | complemer peroxisomal 2,4-dienoyl-CoA redu               | orf19.4157 | 15661 CaSPS20  | ENERGY SUBCELLULAR LOCALISATION                                                           |                                        |
| CA1226 | 1.0 | 1.0 | 1.1 | 0.9 | 1.0 | 1.0 | IPF15660    | complemer putative mitochondrial carrier (by             | orf19.4159 | 15660 IPF15660 | CELLULAR TRANSPORT AND TRANSPORT MECHANISMS                                               | transporter activity                   |
| CA1227 | 1.1 | 1.2 | 1.0 | 1.5 | 1.1 | 1.1 | IPF16082    | 5392948..5 unknown function                              | orf19.4160 | 16082 IPF16082 | PROTEIN FATE [folding modification destination]                                           | molecular_function unknown             |
| CA1228 | 1.0 | 1.1 | 1.0 | 1.0 | 1.0 | 0.9 | IPF16081    | complemer unknown function                               | orf19.4161 | 16081 IPF16081 | UNCLASSIFIED PROTEINS                                                                     | molecular_function unknown             |
| CA1229 | 0.9 | 1.0 | 1.1 | 1.0 | 1.0 | 1.0 | MLH1        | 5395673..5 DNA mismatch repair protein (by               | orf19.4162 | 15970 CaMLH1   | CELL CYCLE AND DNA PROCESSING SUBCELLULAR LOCALISATION                                    | DNA binding                            |
| CA1230 | 1.0 | 1.4 | 1.0 | 0.8 | 1.0 | 1.0 | SSA4        | 5401884..5 cahsp70 mRNA for heat shock                   | orf19.4980 | 11819 CaSSA4   | CELL RESCUE DEFENSE AND VIRULENCE ""SUBCELLULAR LOCAL                                     | chaperone activity                     |
| CA1231 | 0.9 | 0.9 | 1.1 | 1.0 | 1.0 | 1.0 | IPF11817    | complemer unknown function                               | orf19.4981 | 11817 IPF11817 | TRANSPORT FACILITATION                                                                    | molecular_function unknown             |
| CA1232 | 1.0 | 1.0 | 1.1 | 1.0 | 0.9 | 1.1 | IPF11815    | complemer similar to Saccharomyces cerevisi              | orf19.4982 | 11815 IPF11815 | Lipid fatty-acid and isoprenoid metabolism                                                |                                        |
| CA1233 | 0.9 | 1.0 | 1.1 | 1.0 | 1.0 | 1.0 | IPF11814    | complemer unknown function                               | orf19.4983 | 11814 IPF11814 | No significant S.c. match                                                                 |                                        |
| CA1234 | 1.0 | 1.0 | 1.0 | 1.0 | 1.0 | 1.0 | IPF18732    | 5413276..5 histidine-rich glycoprotein precurs           | orf19.8330 | 18732 IPF18732 | No significant S.c. match                                                                 |                                        |
| CA1235 | 1.0 | 0.9 | 0.9 | 0.9 | 0.9 | 0.9 | IPF20079    | complemer unknown function                               | orf19.8332 | 20079 IPF20079 | UNCLASSIFIED PROTEINS                                                                     | molecular_function unknown             |
| CA1236 | 1.1 | 1.0 | 1.0 | 1.0 | 1.0 | 1.0 | YPT6        | 5418379..5 GTP-binding protein of the rab                | orf19.8333 | 15785 CaYPT6   | CELLULAR TRANSPORT AND TRANSPORT MECHANISMS SUBCELL                                       | hydrolase activity                     |
| CA1237 | 1.1 | 1.0 | 1.2 | 1.2 | 1.0 | 1.1 | IPF15784    | complemer unknown function                               | orf19.8334 | 15784 IPF15784 | No significant S.c. match                                                                 |                                        |
| CA1238 | 1.4 | 1.4 | 1.3 | 2.2 | 1.5 | 1.4 | IPF15781    | 5420640..5 unknown function                              | orf19.8335 | 15781 IPF15781 | No significant S.c. match                                                                 |                                        |
| CA1239 | 1.2 | 1.1 | 0.9 | 0.9 | 0.9 | 0.8 | HSP60       | 5422161..5 Heat Shock Protein 60 (HSP60)                 | orf19.717  | 14025 CaHSP60  | PROTEIN FATE [folding modification destination] ""CELL RESCUE DE                          | chaperone activity                     |
| CA1240 | 1.0 | 1.0 | 1.0 | 1.0 | 1.0 | 1.0 | IPF14026    | 5424324..5 similar to Saccharomyces cerevisi             | orf19.8337 | 14026 IPF14026 | TRANSCRIPTION SUBCELLULAR LOCALISATION                                                    | transcription regulator activity       |
| CA1241 | 1.0 | 1.0 | 0.9 | 0.9 | 0.9 | 0.9 | LIP8        | complemer Secretory lipase secretory li                  | orf19.8925 | 7914 CaLIP8    | Other virulence attributes                                                                |                                        |
| CA1242 | 0.8 | 1.0 | 1.0 | 1.1 | 1.0 | 1.0 | IPF19908    | 5452014..5 unknown function                              | orf19.1344 | 19908 IPF19908 | No significant S.c. match                                                                 |                                        |
| CA1243 | 1.1 | 1.1 | 1.1 | 1.1 | 0.9 | 1.0 | IPF7922     | complemer unknown function                               | orf19.8923 | 7922 IPF7922   | Amino acid metabolism C-compound and carbohydrate metabolism TRA                          | transcription regulator activity       |
| CA1244 | 1.0 | 0.9 | 1.1 | 0.9 | 1.0 | 1.0 | IPF12767    | 5465047..5 unknown function                              | orf19.2624 | 12767 IPF12767 | No significant S.c. match                                                                 |                                        |
| CA1245 | 1.1 | 1.0 | 1.1 | 1.0 | 1.0 | 1.1 | IMH3.EXON2  | complemer IMP dehydrogenase, e#NOM?                      | orf19.7689 | 3873 CaIMH3.ex | Nucleotide metabolism Purine ribonucleotide metabolism                                    | oxidoreductase activity                |
| CA1246 | 1.0 | 1.1 | 1.2 | 1.2 | 1.2 | 1.2 | IMH3.EXON1  | complemer IMP dehydrogenase, exon 1                      | orf19.19   | 3872 CaIMH3.ex | Nucleotide metabolism Purine ribonucleotide metabolism                                    |                                        |
| CA1247 | 1.0 | 1.0 | 1.0 | 1.1 | 0.9 | 1.1 | IPF3870     | complemer similar to Saccharomyces cerevisi              | orf19.20   | 3870 IPF3870   | CELL RESCUE DEFENSE AND VIRULENCE ""SUBCELLULAR LOCAL                                     | protein phosphatase activity           |
| CA1248 | 1.0 | 1.1 | 1.1 | 1.0 | 1.0 | 1.0 | IPF3866     | complemer unknown function                               | orf19.7692 | 3866 IPF3866   | SUBCELLULAR LOCALISATION                                                                  | molecular_function unknown             |
| CA1249 | 1.0 | 0.9 | 1.0 | 1.0 | 1.0 | 1.0 | SPE4        | 5482001..5 spermine synthase (by homology)               | orf19.4960 | 9628 CaSPE4    | Secondary metabolism                                                                      | transferase activity                   |
| CA1250 | 1.0 | 1.0 | 1.1 | 0.9 | 1.0 | 1.0 | IPF9626     | 5483727..5 unknown function                              | orf19.1242 | 9626 IPF9626   | No significant S.c. match                                                                 |                                        |
| CA1251 | 0.9 | 1.0 | 1.0 | 1.0 | 1.0 | 1.0 | IPF9624     | complemer similar to Saccharomyces cerevisi              | orf19.1242 | 9624 IPF9624   | CONTROL OF CELLULAR ORGANIZATION                                                          | molecular_function unknown             |
| CA1252 | 1.0 | 1.1 | 1.0 | 1.2 | 1.1 | 1.2 | RPN1        | 5489006..5 26S proteasome regulatory subun               | orf19.1242 | 9623 CaRPN1    | PROTEIN FATE [folding modification destination] ""SUBCELLULAR LOC                         | peptidase activity,signal transduce    |
| CA1253 | 0.9 | 0.9 | 1.1 | 1.2 | 1.0 | 1.2 | FDH3.3F     | complemer formate dehydrogenase, 3-prime e               | orf19.1774 | 9034 CaFDH3.3  | ENERGY                                                                                    |                                        |
| CA1255 | 1.0 | 1.0 | 1.0 | 1.0 | 1.1 | 0.9 | IPF9030     | 5497238..5 unknown function                              | orf19.1776 | 9030 IPF9030   | UNCLASSIFIED PROTEINS                                                                     | nucleotidyltransferase activity        |
| CA1256 | 1.1 | 1.1 | 1.0 | 1.0 | 1.0 | 1.1 | UBP15       | complemer ubiquitin-specific protease (by                | orf19.1777 | 9029 CaUBP15   | PROTEIN FATE [folding modification destination]                                           | peptidase activity                     |
| CA1257 | 1.0 | 0.9 | 1.0 | 1.0 | 1.0 | 0.9 | IPF18725    | complemer unknown function                               | orf19.1067 | 18725 IPF18725 | UNCLASSIFIED PROTEINS                                                                     | molecular_function unknown             |
| CA1258 | 1.0 | 0.9 | 1.0 | 1.1 | 1.1 | 1.0 | RPN8        | 5510003..5 26S proteasome regulatory subun               | orf19.1067 | 18724 CaRPN8   | PROTEIN FATE [folding modification destination] ""SUBCELLULAR LOC                         | peptidase activity                     |
| CA1259 | 1.0 | 0.9 | 1.0 | 1.1 | 0.9 | 1.0 | IPF3174     | 5511244..5 Farnesyl transferase (by homology)            | orf19.1067 | 3174 IPF3174   | Lipid fatty-acid and isoprenoid metabolism ""Metabolism of vitamins cof                   | transferase activity                   |
| CA1260 | 1.0 | 1.0 | 1.1 | 1.0 | 0.9 | 1.0 | IPF3170     | 5512965..5 unknown function                              | orf19.3166 | 3170 IPF3170   | UNCLASSIFIED PROTEINS                                                                     | molecular_function unknown             |
| CA1261 | 1.1 | 1.0 | 1.0 | 1.0 | 1.1 | 1.2 | IPF9887.3EO | 5519470..5 unknown function, 3-prime end                 | orf19.1240 | 9887 IPF9887.3 | UNCLASSIFIED PROTEINS                                                                     | molecular_function unknown             |
| CA1262 | 1.0 | 1.1 | 1.0 | 1.0 | 1.0 | 1.0 | MDR1        | 5527606..5 Mac1p interacting protein (by                 | orf19.1244 | 9881 CaMDR1    | TRANSCRIPTION ""CELL RESCUE DEFENSE AND VIRULENCE ""                                      | enzyme regulator activity              |
| CA1263 | 1.2 | 1.1 | 1.0 | 1.0 | 1.0 | 1.1 | IPF9880     | complemer unknown function                               | orf19.1246 | 9880 IPF9880   | No significant S.c. match                                                                 |                                        |
| CA1264 | 0.9 | 1.0 | 1.0 | 1.2 | 1.1 | 1.1 | STH1        | complemer helicase related protein by homolo             | orf19.239  | 10096 CaSTH1   | CELL CYCLE AND DNA PROCESSING TRANSCRIPTION SUBCELLUL                                     | DNA binding,helicase activity          |
| CA1265 | 0.9 | 0.9 | 1.0 | 1.0 | 1.0 | 1.0 | IPF10510    | 5542480..5 unknown function                              | orf19.240  | 10510 IPF10510 | UNCLASSIFIED PROTEINS                                                                     |                                        |
| CA1266 | 1.0 | 1.0 | 1.0 | 1.0 | 1.0 | 1.0 | SAP8        | complemer aspartic protease                              | orf19.242  | 10508 CaSAP8   | PROTEIN FATE [folding modification destination] ""SUBCELLULAR LOCALISATION                | Other virulence attribut               |
| CA1267 | 1.0 | 0.9 | 1.1 | 1.0 | 1.1 | 1.0 | YSY6        | 5546802..5 protein involved in the secretory pathway, by |            | 10503 CaYSY6   | PROTEIN FATE [folding modification destination] ""CELLULAR TRANSPORT AND TRANSPORT MECHAN |                                        |
| CA1268 | 1.0 | 1.0 | 1.0 | 1.0 | 0.9 | 1.0 | IPF14693    | complemer unknown function                               | orf19.3159 | 14693 IPF14693 | UNCLASSIFIED PROTEINS                                                                     | molecular_function unknown             |
| CA1269 | 1.1 | 1.1 | 1.0 | 1.0 | 1.0 | 1.0 | IPF19726    | 5552779..5 unknown function                              | orf19.1066 | 19726 IPF19726 | UNCLASSIFIED PROTEINS                                                                     | molecular_function unknown             |
| CA1270 | 1.1 | 0.9 | 0.9 | 1.0 | 1.0 | 0.9 | IPF13504    | 5558228..5 unknown function                              | orf19.1066 | 13504 IPF13504 | No significant S.c. match                                                                 |                                        |
| CA1271 | 1.0 | 0.9 | 0.9 | 1.0 | 1.0 | 1.0 | HIT1        | 5569225..5 required for growth at high temper            | orf19.2723 | 6402 CaHIT1    | CELL RESCUE DEFENSE AND VIRULENCE                                                         | molecular_function unknown             |
| CA1272 | 1.0 | 1.0 | 1.1 | 1.0 | 0.9 | 1.0 | CGR1        | complemer Cell growth protein (by homology)              | orf19.2722 | 18718 CaCGR1   | UNCLASSIFIED PROTEINS                                                                     | molecular_function unknown             |

|        |     |     |     |     |     |     |              |                                                        |             |       |            |                                                                                                          |                                               |
|--------|-----|-----|-----|-----|-----|-----|--------------|--------------------------------------------------------|-------------|-------|------------|----------------------------------------------------------------------------------------------------------|-----------------------------------------------|
| CA1273 | 1.0 | 1.0 | 1.0 | 1.0 | 1.1 | 1.0 | CCT4         | 5572601..5 Component of chaperonin-contain             | orf19.2720  | 6406  | CaCCT4     | PROTEIN FATE [folding modification destination] ""SUBCELLULAR LOC                                        | chaperone activity                            |
| CA1274 | 1.0 | 1.0 | 1.1 | 1.0 | 1.1 | 1.0 | SAS10        | complemer Involved in silencing (by homology           | orf19.2717  | 6410  | CaSAS10    | TRANSCRIPTION SUBCELLULAR LOCALISATION                                                                   | RNA binding                                   |
| CA1275 | 1.0 | 1.0 | 1.0 | 1.0 | 1.0 | 1.0 | RPC53        | 5576302..5 DNA-directed RNA polymerase III             | orf19.2715  | 19910 | CaRPC53    | TRANSCRIPTION SUBCELLULAR LOCALISATION                                                                   | nucleotidyltransferase activity               |
| CA1277 | 1.1 | 1.0 | 1.0 | 1.0 | 1.0 | 1.1 | IPF10837     | 5581353..5 unknown function                            | orf19.3630  | 10837 | IPF10837   | TRANSCRIPTION                                                                                            | transferase activity                          |
| CA1278 | 1.0 | 1.0 | 0.9 | 1.0 | 1.0 | 1.0 | IPF10835     | 5584841..5 unknown function                            | orf19.3629  | 10835 | IPF10835   | UNCLASSIFIED PROTEINS                                                                                    | molecular_function unknown                    |
| CA1279 | 1.1 | 1.0 | 1.0 | 1.0 | 1.1 | 1.0 | RSP5         | 5588206..5 ubiquitin-protein ligase (by homol          | orf19.3628  | 10833 | CaRSP5     | PROTEIN FATE [folding modification destination] ""CELL RESCUE DE                                         | ligase activity                               |
| CA1280 | 0.9 | 1.0 | 1.0 | 1.0 | 1.0 | 1.0 | IPF10828     | 5591405..5 unknown function                            | orf19.3627  | 10828 | IPF10828   | UNCLASSIFIED PROTEINS                                                                                    |                                               |
| CA1281 | 1.0 | 1.1 | 1.0 | 1.1 | 1.0 | 0.9 | IPF10171.EXC | complemer unknown function, exon 3                     | orf19.645   | 10174 | IPF10171.ε | C-compound and carbohydrate metabolism                                                                   | CELLULAR TRANSPORT AND TRANSPORT MECHANISMS S |
| CA1282 | 1.1 | 1.0 | 1.1 | 0.9 | 1.0 | 1.0 | IPF10171.EXC | complemer unknown function, exon 2                     |             | 10173 | IPF10171.ε | C-compound and carbohydrate metabolism                                                                   | CONTROL OF CELLULAR ORGANIZATION TRANSPORT FA |
| CA1283 | 0.9 | 0.9 | 1.0 | 1.0 | 0.8 | 0.9 | IPF10171.EXC | complemer unknown function, exon 1                     | orf19.644   | 10171 | IPF10171.ε | C-compound and carbohydrate metabolism                                                                   | CELLULAR TRANSPORT AND TRANSPORT MECHANISMS F |
| CA1284 | 0.9 | 1.0 | 1.0 | 1.0 | 0.9 | 0.9 | IPF10168.3   | 5603150..5 unknown function, 3-prime end               | orf19.8257  | 10168 | IPF10168.ε | CELL CYCLE AND DNA PROCESSING CELL FATE                                                                  | molecular_function unknown                    |
| CA1285 | 0.9 | 0.8 | 1.0 | 0.9 | 1.0 | 0.9 | SKP1         | 5610067..5 kinetochore protein complex CBF3            | orf19.1190  | 5549  | CaSKP1     | Amino acid metabolism C-compound and carbohydrate metabolism                                             | CEL protein binding                           |
| CA1286 | 1.0 | 1.0 | 1.0 | 1.1 | 1.0 | 1.0 | IPF5546      | 5611387..5 unknown function                            | orf19.1190  | 5546  | IPF5546    | CELL CYCLE AND DNA PROCESSING TRANSCRIPTION SUBCELLULAR LOCALISATION                                     |                                               |
| CA1287 | 1.1 | 1.0 | 1.1 | 1.0 | 1.0 | 1.0 | IPF5545      | complemer unknown function                             | orf19.4430  | 5545  | IPF5545    | PROTEIN FATE [folding modification destination]                                                          | molecular_function unknown                    |
| CA1288 | 0.8 | 1.0 | 0.9 | 0.9 | 1.0 | 1.1 | KSP1         | 5616957..5 SERINE/THREONINE-PROTEIN                    | orf19.4432  | 5540  | CaKSP1     | SUBCELLULAR LOCALISATION                                                                                 | protein kinase activity                       |
| CA1289 | 0.9 | 1.0 | 1.0 | 1.1 | 1.0 | 1.0 | ZUO1         | 5623854..5 Zuo1in, a putative Z-DNA binding            | (orf19.1022 | 16213 | CaZUO1     | SUBCELLULAR LOCALISATION                                                                                 | chaperone activity                            |
| CA1290 | 0.9 | 1.0 | 1.0 | 1.0 | 1.0 | 1.2 | IPF16212     | complemer unknown function                             | orf19.2710  | 16212 | IPF16212   | C-compound and carbohydrate metabolism                                                                   | enzyme regulator activity                     |
| CA1291 | 0.9 | 1.0 | 1.1 | 1.0 | 1.0 | 1.0 | IPF16752     | complemer unknown function                             | orf19.2711  | 16752 | IPF16752   | TRANSCRIPTION                                                                                            | transcription regulator activity              |
| CA1292 | 1.0 | 1.1 | 1.1 | 1.0 | 1.1 | 1.0 | SRB2.3       | 5629009..5 DNA-directed RNA polymerase II holoenzyme   |             | 6419  | CaSRB2.3   | TRANSCRIPTION SUBCELLULAR LOCALISATION                                                                   | transcription regulator activity              |
| CA1293 | 1.1 | 1.0 | 0.9 | 1.1 | 1.0 | 1.1 | HCA4         | 5630031..5 Can suppress the U14 snoRNA rRor            | orf19.2712  | 6418  | CaHCA4     | TRANSCRIPTION CONTROL OF CELLULAR ORGANIZATION                                                           | RNA binding,helicase activity                 |
| CA1294 | 1.0 | 1.0 | 1.0 | 1.1 | 1.0 | 1.0 | MSH5.3F      | complemer Meiosis-specific protein, 3-prime e          | orf19.1022  | 6415  | CaMSH5.3   | CELL CYCLE AND DNA PROCESSING SUBCELLULAR LOCALISATION                                                   | molecular_function unknown                    |
| CA1296 | 1.0 | 1.0 | 1.0 | 1.1 | 1.0 | 1.0 | IPF18712     | 5635451..5 unknown function                            |             | 18712 | IPF18712   | UNCLASSIFIED PROTEINS                                                                                    |                                               |
| CA1297 | 1.0 | 1.0 | 1.0 | 1.0 | 1.0 | 1.1 | ACF2         | 5637459..5 endo-1,3-beta-glucanase                     | orf19.3417  | 14734 | CaACF2     | PROTEIN FATE [folding modification destination] ""CONTROL OF CELL                                        | hydrolase activity                            |
| CA1298 | 1.1 | 0.9 | 0.9 | 1.1 | 0.9 | 1.0 | RPL32        | 5640699..5 ribosomal protein L32                       |             | 12449 | CaRPL32    | PROTEIN SYNTHESIS SUBCELLULAR LOCALISATION                                                               | structural molecule activity                  |
| CA1299 | 1.0 | 1.0 | 1.0 | 1.0 | 1.0 | 1.0 | PTK2         | complemer serine /threonine protein kinase in          | orf19.3415  | 12448 | CaPTK2     | CELLULAR TRANSPORT AND TRANSPORT MECHANISMS REGULA                                                       | protein kinase activity                       |
| CA1300 | 1.0 | 1.0 | 1.0 | 1.0 | 1.0 | 1.0 | SLY41        | 5650076..5 vesicular transport (by homology)           | orf19.4199  | 12346 | CaSLY41    | CELLULAR TRANSPORT AND TRANSPORT MECHANISMS                                                              | molecular_function unknown                    |
| CA1301 | 1.0 | 1.0 | 1.0 | 1.0 | 0.9 | 1.0 | YHM2         | complemer mtDNA stabilizing protein (by hom            | orf19.4197  | 12348 | CaYHM2     | CELL CYCLE AND DNA PROCESSING SUBCELLULAR LOCALISATION                                                   | transporter activity                          |
| CA1302 | 0.9 | 0.9 | 1.0 | 0.9 | 0.9 | 1.0 | FCA1.3       | 5654565..5 cytosine deaminase, 3 cytosine deaminase [C |             | 13513 | CaFCA1.3   | Nucleotide metabolism                                                                                    | hydrolase activity                            |
| CA1303 | 0.9 | 1.0 | 1.0 | 1.1 | 1.0 | 1.0 | TFB4         | complemer component of RNA polymerase tra              | orf19.4194  | 13511 | CaTFB4     | CELL CYCLE AND DNA PROCESSING TRANSCRIPTION SUBCELLUL                                                    | transcription regulator activity              |
| CA1304 | 1.0 | 1.0 | 0.7 | 0.9 | 1.0 | 1.1 | RPS13.3      | complemer ribosomal protein, 3-prime end (by homology) |             | 13509 | CaRPS13.3  | PROTEIN SYNTHESIS SUBCELLULAR LOCALISATION                                                               | structural molecule activity                  |
| CA1305 | 0.9 | 0.9 | 1.0 | 1.1 | 1.0 | 0.9 | IPF13508     | complemer unknown function                             | orf19.4193  | 13508 | IPF13508   | UNCLASSIFIED PROTEINS                                                                                    | molecular_function unknown                    |
| CA1306 | 1.0 | 1.0 | 1.0 | 1.0 | 0.9 | 1.0 | CDC14.3      | 5659135..5 protein phosphatase, 3-prime end            | orf19.4192  | 13507 | CaCDC14.3  | CELL CYCLE AND DNA PROCESSING                                                                            | protein phosphatase activity                  |
| CA1307 | 0.9 | 0.9 | 1.0 | 1.1 | 1.0 | 1.0 | IPF13506.3   | complemer unknown function, 3-prime end                |             | 13506 | IPF13506.ε | No significant S.c. match                                                                                |                                               |
| CA1308 | 1.0 | 1.0 | 1.0 | 1.0 | 1.0 | 1.0 | IPF8642      | 5663134..5 unknown function                            | orf19.1145  | 8642  | IPF8642    | UNCLASSIFIED PROTEINS                                                                                    |                                               |
| CA1309 | 0.9 | 0.9 | 1.0 | 1.0 | 1.1 | 1.0 | IPF8627      | 5671739..5 unknown function                            | orf19.1145  | 8627  | IPF8627    | TRANSCRIPTION SUBCELLULAR LOCALISATION                                                                   |                                               |
| CA1310 | 1.0 | 0.9 | 1.1 | 0.9 | 1.0 | 1.0 | IPF14232     | 5675956..5 unknown function                            | orf19.1111  | 14232 | IPF14232   | No significant S.c. match                                                                                |                                               |
| CA1311 | 1.0 | 1.0 | 1.0 | 0.9 | 1.0 | 0.9 | IPF14233     | 5678043..5 Putative tranthyretin precursor (b          | orf19.3633  | 14233 | IPF14233   | UNCLASSIFIED PROTEINS                                                                                    |                                               |
| CA1312 | 0.9 | 0.9 | 1.0 | 1.1 | 1.0 | 1.0 | IPF14241     | complemer unknown function                             | orf19.1111  | 14241 | IPF14241   | No significant S.c. match                                                                                |                                               |
| CA1313 | 0.9 | 1.0 | 1.0 | 1.1 | 1.0 | 1.0 | IPF14126     | 5686766..5 unknown function                            | orf19.3638  | 14126 | IPF14126   | No significant S.c. match                                                                                |                                               |
| CA1314 | 1.0 | 1.1 | 1.1 | 1.0 | 0.9 | 0.9 | MAG1         | complemer 3-methyladenine DNA glycosylase              | orf19.3639  | 14127 | CaMAG1     | CELL CYCLE AND DNA PROCESSING SUBCELLULAR LOCALISATION                                                   | DNA binding                                   |
| CA1315 | 0.9 | 1.0 | 0.9 | 1.0 | 1.1 | 1.0 | URA2.5EOC    | complemer multifunctional pyrimidine biosynth          | orf19.9896  | 10801 | CaURA2.5   | Nucleotide metabolism SUBCELLULAR LOCALISATION                                                           | transferase activity                          |
| CA1316 | 0.9 | 1.0 | 1.0 | 1.0 | 1.0 | 0.9 | IPF14587.3   | 5701736..5 unknown function, 3-prime end               |             | 14587 | IPF14587.ε | No significant S.c. match                                                                                |                                               |
| CA1318 | 1.0 | 1.0 | 1.1 | 1.0 | 1.0 | 0.8 | IPF3147      | complemer Nuclear valosin-containing protein           | orf19.4219  | 3147  | IPF3147    | CLASSIFICATION NOT YET CLEAR-CUT                                                                         | helicase activity                             |
| CA1319 | 1.0 | 1.0 | 0.9 | 0.9 | 0.9 | 0.9 | IPF3144      | complemer unknown function                             | orf19.4220  | 3144  | IPF3144    | UNCLASSIFIED PROTEINS                                                                                    | molecular_function unknown                    |
| CA1320 | 1.0 | 1.1 | 0.9 | 1.0 | 1.0 | 1.0 | IPF3143      | complemer similar to Saccharomyces cerevisi            | orf19.4221  | 3143  | IPF3143    | CELL CYCLE AND DNA PROCESSING TRANSCRIPTION CELL FATE                                                    | DNA binding                                   |
| CA1321 | 1.0 | 1.1 | 1.1 | 1.1 | 1.0 | 0.9 | IPF3141      | 5715614..5 similar to Saccharomyces cerevisi           | orf19.4222  | 3141  | IPF3141    | PROTEIN FATE [folding modification destination] ""REGULATION OF/IN enzyme regulator activity             |                                               |
| CA1322 | 1.0 | 1.0 | 1.0 | 1.0 | 1.1 | 1.1 | GCD11        | complemer Translation initiation factor eIF2 (b        | orf19.4223  | 3140  | CaGCD11    | TRANSCRIPTION PROTEIN SYNTHESIS SUBCELLULAR LOCALISATION                                                 | translation regulator activity                |
| CA1323 | 1.0 | 1.0 | 0.9 | 1.0 | 0.9 | 0.9 | IPF6675      | complemer unknown function                             | orf19.1309  | 6675  | IPF6675    | No significant S.c. match                                                                                |                                               |
| CA1324 | 1.0 | 1.0 | 0.9 | 1.0 | 1.0 | 1.0 | IPF6676      | 5723687..5 polytopic membrane protein involv           | orf19.1308  | 6676  | IPF6676    | CELL RESCUE DEFENSE AND VIRULENCE ""TRANSPORT FACILITA                                                   | molecular_function unknown                    |
| CA1325 | 1.0 | 1.0 | 1.0 | 1.0 | 1.0 | 1.0 | IPF6678      | complemer unknown function                             | orf19.1307  | 6678  | IPF6678    | UNCLASSIFIED PROTEINS                                                                                    |                                               |
| CA1326 | 1.1 | 1.0 | 1.0 | 1.0 | 1.1 | 1.0 | IPF6679      | complemer unknown function                             | orf19.1306  | 6679  | IPF6679    | No significant S.c. match                                                                                |                                               |
| CA1327 | 1.1 | 1.0 | 1.0 | 1.0 | 1.0 | 1.0 | IPF6680      | complemer unknown function                             | orf19.1305  | 6680  | IPF6680    | UNCLASSIFIED PROTEINS                                                                                    | transferase activity                          |
| CA1328 | 0.9 | 1.0 | 1.0 | 1.0 | 0.9 | 1.0 | RRP4         | 5730636..53 ->5 exoribonuclease required fo            | orf19.1304  | 6682  | CaRRP4     | No significant S.c. match                                                                                |                                               |
| CA1329 | 1.1 | 1.1 | 1.0 | 1.2 | 1.1 | 1.0 | MRF2         | complemer peptide chain release factor,                | orf19.1303  | 19626 | CaMRF2     | PROTEIN SYNTHESIS SUBCELLULAR LOCALISATION                                                               | translation regulator activity                |
| CA1330 | 0.9 | 0.9 | 1.0 | 0.9 | 1.0 | 1.0 | IPF11713     | 5738047..5 unknown function                            | orf19.8744  | 11713 | IPF11713   | Lipid fatty-acid and isoprenoid metabolism ""Metabolism of vitamins cofactors and prosthetic groups ""PF |                                               |
| CA1331 | 1.1 | 1.0 | 1.0 | 1.0 | 1.1 | 1.0 | IPF11714     | complemer unknown function                             |             | 11714 | IPF11714   | No significant S.c. match                                                                                |                                               |
| CA1332 | 1.1 | 1.0 | 1.0 | 1.0 | 1.0 | 0.9 | IPF11716     | 5740711..5 unknown function                            | orf19.1150  | 11716 | IPF11716   | Nitrogen and sulphur metabolism TRANSCRIPTION SUBCELLULAR LOCALISATION                                   |                                               |
| CA1333 | 1.2 | 1.1 | 1.0 | 1.1 | 1.0 | 1.1 | MRF1         | complemer mitochondrial respiratory function           | orf19.8742  | 11717 | CaMRF1     | TRANSCRIPTION SUBCELLULAR LOCALISATION                                                                   |                                               |
| CA1334 | 1.0 | 1.0 | 1.1 | 1.0 | 1.0 | 1.0 | IPF19912     | complemer unknown function                             | orf19.8740  | 19912 | IPF19912   | CELL RESCUE DEFENSE AND VIRULENCE ""CELL FATE                                                            |                                               |
| CA1335 | 1.1 | 1.1 | 1.0 | 1.0 | 0.9 | 1.0 | TRA1         | 5749821..5 phosphatidylinositol kinase by hom          | orf19.3451  | 5342  | CaTRA1     | TRANSCRIPTION                                                                                            | transferase activity                          |
| CA1336 | 1.1 | 1.1 | 1.1 | 1.0 | 1.0 | 1.0 | IPF5334.EXO  | complemer unknown function, exon 2                     |             | 5335  | IPF5334.ε  | UNCLASSIFIED PROTEINS                                                                                    | molecular_function unknown                    |
| CA1338 | 1.0 | 0.9 | 1.0 | 0.8 | 0.9 | 1.0 | IPF5333      | 5758841..5 unknown function                            | orf19.1095  | 5333  | IPF5333    | UNCLASSIFIED PROTEINS                                                                                    | molecular_function unknown                    |
| CA1339 | 1.0 | 0.9 | 0.9 | 0.9 | 1.0 | 1.1 | IPF5330      | 5762965..5 unknown function                            | orf19.1095  | 5330  | IPF5330    | No significant S.c. match                                                                                |                                               |
| CA1340 | 0.9 | 1.0 | 1.0 | 1.0 | 1.0 | 1.0 | VPS4         | 5770457..5 vacuolar sorting protein by homol           | orf19.4339  | 11343 | CaVPS4     | PROTEIN FATE [folding modification destination] ""CELLULAR TRANSP                                        | hydrolase activity                            |
| CA1341 | 0.9 | 0.9 | 1.0 | 1.0 | 1.0 | 1.0 | IPF11344     | complemer unknown function                             | orf19.4340  | 11344 | IPF11344   | CELLULAR TRANSPORT AND TRANSPORT MECHANISMS REGULATION OF/INTERACTION WITH CEI                           |                                               |
| CA1342 | 1.0 | 1.0 | 1.0 | 0.9 | 1.0 | 1.0 | IPF11347     | complemer unknown function                             |             | 11347 | IPF11347   | No significant S.c. match                                                                                |                                               |
| CA1343 | 1.0 | 1.0 | 1.0 | 1.0 | 0.9 | 0.9 | IPF14624     | 5779872..5 unknown function                            |             | 14624 | IPF14624   | No significant S.c. match                                                                                |                                               |
| CA1344 | 1.0 | 1.0 | 1.1 | 1.0 | 0.9 | 0.9 | IPF14623     | 5780307..5 unknown function                            | orf19.4342  | 14623 | IPF14623   | CELLULAR TRANSPORT AND TRANSPORT MECHANISMS                                                              | transcription regulator activity              |
| CA1345 | 1.0 | 1.0 | 1.0 | 1.1 | 1.1 | 1.1 | IPF6003      | 5788850..5 similar to Saccharomyces cerevisi           | orf19.1490  | 6003  | IPF6003    | CELL FATE SUBCELLULAR LOCALISATION                                                                       | signal transducer activity                    |
| CA1346 | 1.0 | 1.0 | 1.0 | 1.0 | 1.1 | 1.0 | KRE2.3F      | complemer secretory pathway protein, 3-prime end       |             | 18700 | CaKRE2.3   | No significant S.c. match                                                                                |                                               |
| CA1349 | 1.1 | 1.1 | 1.1 | 1.1 | 1.1 | 1.1 | PRP12        | 5804530..5 involved in early maturation of pre         | orf19.4351  | 12922 | CaPRP12    | TRANSCRIPTION SUBCELLULAR LOCALISATION                                                                   | hydrolase activity                            |
| CA1350 | 1.0 | 1.0 | 1.0 | 0.9 | 1.0 | 1.1 | MCM2         | complemer replication licensing factor (by hom         | orf19.4354  | 15306 | CaMCM2     | CELL CYCLE AND DNA PROCESSING SUBCELLULAR LOCALISATION                                                   | DNA binding                                   |

|        |     |     |     |     |     |     |             |                                                         |             |       |              |                                                                                                                        |                                     |
|--------|-----|-----|-----|-----|-----|-----|-------------|---------------------------------------------------------|-------------|-------|--------------|------------------------------------------------------------------------------------------------------------------------|-------------------------------------|
| CA1351 | 1.0 | 1.0 | 1.0 | 1.0 | 1.0 | 1.0 | PCL2        | complemer G1/S specific cyclin                          | orf19.403   | 8834  | CaPCL2       | CELL CYCLE AND DNA PROCESSING                                                                                          | protein kinase activity,enzyme regi |
| CA1352 | 0.9 | 1.0 | 1.1 | 1.2 | 1.1 | 1.0 | VCX1        | complemer Ca2+-transport by homology                    | orf19.405   | 16576 | CaVCX1       | CELLULAR TRANSPORT AND TRANSPORT MECHANISMS REGULATED BY TRANSPORTER ACTIVITY                                          | transporter activity                |
| CA1353 | 1.0 | 1.0 | 1.0 | 0.9 | 0.9 | 1.1 | ERG1        | complemer squalene epoxidase                            | orf19.406   | 19729 | CaERG1       | Lipid fatty-acid and isoprenoid metabolism ""SUBCELLULAR LOCALISATION                                                  | oxidoreductase activity             |
| CA1354 | 1.1 | 1.0 | 1.0 | 1.0 | 1.0 | 1.0 | GCD6        | complemer translation initiation factor- like protein   | orf19.407   | 10142 | CaGCD6       | PROTEIN SYNTHESIS SUBCELLULAR LOCALISATION                                                                             | translation regulator activity      |
| CA1355 | 1.0 | 0.6 | 0.7 | 0.8 | 1.0 | 0.5 | IPF10138.3F | complemer unknown function, 3-prime end                 | orf19.408   | 10140 | IPF10138.3F  | No significant S.c. match                                                                                              |                                     |
| CA1356 | 0.7 | 0.6 | 1.0 | 0.9 | 1.0 | 0.9 | IPF10138.5F | complemer unknown function, 5-prime end                 | orf19.409   | 10138 | IPF10138.5F  | UNCLASSIFIED PROTEINS                                                                                                  | molecular_function unknown          |
| CA1357 | 1.1 | 1.0 | 1.1 | 1.0 | 1.0 | 1.0 | ARH1        | 5829588..5.adrenodoxin reductase and ferredoxin         | orf19.410   | 10134 | CaARH1       | Lipid fatty-acid and isoprenoid metabolism ""SUBCELLULAR LOCALISATION                                                  | transporter activity                |
| CA1358 | 1.1 | 1.0 | 1.1 | 0.9 | 1.0 | 1.0 | NIF3        | complemer Ngg1p-interacting factor 3 (by homology)      | orf19.4406  | 11837 | CaNIF3       | TRANSCRIPTION                                                                                                          | molecular_function unknown          |
| CA1359 | 1.0 | 1.0 | 1.0 | 1.0 | 1.0 | 1.0 | IPF11842    | complemer unknown function                              | orf19.4405  | 11842 | IPF11842     | CELL CYCLE AND DNA PROCESSING                                                                                          |                                     |
| CA1360 | 1.0 | 1.0 | 1.0 | 0.9 | 1.0 | 1.0 | IPF14598    | 5844203..5.unknown function                             | orf19.4404  | 14598 | IPF14598     | No significant S.c. match                                                                                              |                                     |
| CA1361 | 1.0 | 1.0 | 1.0 | 1.0 | 0.9 | 1.0 | PEP5        | 5846748..5.vacuolar biogenesis protein vacuolar protein | orf19.4403  | 11853 | CaPEP5       | PROTEIN FATE [folding modification destination] ""CELLULAR TRANSPORT AND TRANSPORT MECHANISMS SUBCELLULAR LOCALISATION | molecular_function unknown          |
| CA1362 | 1.1 | 1.0 | 1.1 | 1.0 | 0.9 | 1.0 | PEX3        | complemer PEROXISOMAL MEMBRANE PROTEIN                  | orf19.4426  | 5552  | CaPEX3       | CELLULAR TRANSPORT AND TRANSPORT MECHANISMS SUBCELLULAR LOCALISATION                                                   | molecular_function unknown          |
| CA1363 | 1.2 | 1.0 | 1.0 | 1.1 | 1.0 | 1.0 | IPF5556     | 5857554..5.acid phosphatase (by homology)               | orf19.4424  | 5556  | IPF5556      | No significant S.c. match                                                                                              |                                     |
| CA1364 | 1.1 | 1.0 | 0.9 | 1.0 | 1.1 | 1.1 | IPF5561     | 5859512..5.unknown function                             | orf19.4423  | 5561  | IPF5561      | UNCLASSIFIED PROTEINS                                                                                                  |                                     |
| CA1365 | 1.0 | 1.1 | 1.0 | 1.0 | 1.0 | 1.1 | IPF11849    | 5867837..5.unknown function                             | orf19.4459  | 11849 | IPF11849     | UNCLASSIFIED PROTEINS                                                                                                  |                                     |
| CA1366 | 1.1 | 1.1 | 0.9 | 1.1 | 1.0 | 1.0 | IPF11847    | 5871971..5.unknown function                             | orf19.4457  | 11847 | IPF11847     | PROTEIN FATE [folding modification destination] ""CELL FATE SUBCELLULAR LOCALISATION                                   | protein binding                     |
| CA1367 | 1.0 | 1.0 | 1.1 | 1.0 | 1.0 | 0.9 | IPF16755    | 5882980..5.unknown function                             | orf19.4966  | 16755 | IPF16755     | C-compound and carbohydrate metabolism CELLULAR TRANSPORT AND TRANSPORT MECHANISMS SUBCELLULAR LOCALISATION            | transporter activity                |
| CA1368 | 1.1 | 0.9 | 1.0 | 1.0 | 1.0 | 1.1 | IPF15969    | complemer unknown function                              | orf19.4965  | 15969 | IPF15969     | No significant S.c. match                                                                                              |                                     |
| CA1369 | 0.9 | 0.9 | 1.0 | 1.0 | 1.0 | 1.1 | IPF15968    | complemer unknown function                              | orf19.4964  | 15968 | IPF15968     | UNCLASSIFIED PROTEINS                                                                                                  | molecular_function unknown          |
| CA1370 | 1.0 | 0.9 | 1.0 | 1.0 | 1.0 | 1.0 | TC11        | complemer protein phosphatase Two C-Interactant         | orf19.4963  | 15966 | CaTC11       | UNCLASSIFIED PROTEINS                                                                                                  | molecular_function unknown          |
| CA1371 | 1.0 | 1.0 | 1.0 | 1.0 | 1.0 | 1.1 | IPF19731    | 5890450..5.unknown function                             | orf19.4962  | 19731 | IPF19731     | UNCLASSIFIED PROTEINS                                                                                                  | molecular_function unknown          |
| CA1372 | 1.0 | 1.0 | 0.9 | 1.0 | 1.0 | 1.1 | IPF15844    | complemer similar to Saccharomyces cerevisiae           | orf19.4961  | 15844 | IPF15844     | TRANSCRIPTION                                                                                                          | transcription regulator activity    |
| CA1373 | 1.0 | 0.9 | 1.0 | 0.8 | 1.0 | 0.8 | AGP1        | complemer asparagine and glutamine permease             | orf19.8784  | 7152  | CaAGP1       | Amino acid metabolism TRANSPORT FACILITATION                                                                           | transporter activity                |
| CA1374 | 0.9 | 1.1 | 0.9 | 1.0 | 0.9 | 1.0 | MIP1        | complemer Mitochondrial intermediate peptidase          | orf19.1195  | 7154  | CaMIP1       | PROTEIN FATE [folding modification destination] ""REGULATION OF/IN PROTEIN FOLDING                                     | peptidase activity                  |
| CA1375 | 1.0 | 1.0 | 1.0 | 1.0 | 1.0 | 1.0 | IPF7158     | 5903699..5.putative serine/threonine kinase             | orf19.8787  | 7158  | IPF7158      | CLASSIFICATION NOT YET CLEAR-CUT                                                                                       | protein kinase activity             |
| CA1376 | 0.9 | 1.0 | 1.0 | 1.0 | 1.1 | 0.9 | IPF7159     | complemer unknown function                              | orf19.8789  | 7159  | IPF7159      | UNCLASSIFIED PROTEINS                                                                                                  | molecular_function unknown          |
| CA1377 | 1.0 | 1.1 | 1.0 | 1.0 | 1.1 | 1.0 | IPF18690    | complemer unknown function                              | orf19.461   | 18690 | IPF18690     | No significant S.c. match                                                                                              |                                     |
| CA1378 | 1.0 | 1.0 | 1.0 | 1.0 | 1.0 | 1.0 | ERK2        | 5912192..5.mitogen-activated protein kinase (l)         | orf19.460   | 2568  | CaERK2       | CELL CYCLE AND DNA PROCESSING REGULATION OF/INTERACTION WITH CELLULAR ENVIRONMENT                                      |                                     |
| CA1380 | 1.0 | 1.0 | 1.0 | 1.0 | 0.9 | 1.0 | BCS1        | complemer mitochondrial protein of the CDC4             | orf19.458   | 2574  | CaBCS1       | PROTEIN FATE [folding modification destination] ""SUBCELLULAR LOCALISATION                                             | hydrolase activity                  |
| CA1381 | 1.0 | 1.1 | 0.9 | 1.0 | 0.9 | 1.0 | IPF8420     | complemer unknown function                              | orf19.929   | 8420  | IPF8420      | CELL RESCUE DEFENSE AND VIRULENCE ""TRANSPORT FACILITATION                                                             |                                     |
| CA1382 | 1.0 | 1.0 | 1.1 | 1.0 | 1.0 | 0.9 | IPF8421     | complemer unknown function                              | orf19.928   | 8421  | IPF8421      | No significant S.c. match                                                                                              |                                     |
| CA1383 | 0.9 | 1.0 | 1.0 | 1.1 | 1.0 | 1.0 | IPF8422     | 5926369..5.unknown function                             | orf19.927   | 8422  | IPF8422      | UNCLASSIFIED PROTEINS                                                                                                  | molecular_function unknown          |
| CA1384 | 1.0 | 1.0 | 1.0 | 1.0 | 0.9 | 1.0 | IPF8423     | complemer similar to Saccharomyces cerevisiae           | orf19.926   | 8423  | IPF8423      | Nucleotide metabolism CELL CYCLE AND DNA PROCESSING                                                                    | hydrolase activity,DNA binding      |
| CA1385 | 1.0 | 1.0 | 1.0 | 1.0 | 1.0 | 1.0 | IPF8424     | complemer unknown function                              | orf19.925   | 8424  | IPF8424      | TRANSCRIPTION                                                                                                          |                                     |
| CA1386 | 1.1 | 0.9 | 1.0 | 1.0 | 1.0 | 1.0 | THR1        | complemer homoserine kinase                             | orf19.923   | 8426  | CaTHR1       | Amino acid metabolism                                                                                                  | transferase activity                |
| CA1387 | 1.0 | 1.0 | 1.0 | 1.1 | 1.0 | 1.0 | ERG16       | complemer cytochrome P450 lanosterol cytochrome         | orf19.922   | 8427  | CaERG16      | Lipid fatty-acid and isoprenoid metabolism ""CELL RESCUE DEFENSE AND VIRULENCE                                         | oxidoreductase activity             |
| CA1388 | 0.9 | 0.9 | 1.0 | 1.0 | 1.0 | 1.0 | IPF16514    | complemer unknown function                              | orf19.921   | 16514 | IPF16514     | No significant S.c. match                                                                                              |                                     |
| CA1389 | 1.0 | 0.9 | 1.0 | 0.9 | 1.0 | 1.0 | PLP2        | 5939493..5.Might regulate Ste4p in pheromone response   | orf19.9338  | 17476 | CaPLP2       | CELL FATE                                                                                                              | enzyme regulator activity           |
| CA1390 | 1.0 | 1.0 | 1.1 | 0.9 | 0.9 | 0.8 | IPF17474    | 5940747..5.unknown function                             | orf19.1768  | 17474 | IPF17474     | CELL CYCLE AND DNA PROCESSING ""PROTEIN FATE [folding modification destination] ""SUBCELLULAR LOCALISATION             |                                     |
| CA1391 | 1.0 | 1.0 | 1.0 | 1.0 | 1.0 | 1.0 | IPF6151     | 5942778..5.unknown function                             |             | 6151  | IPF6151      | CELL CYCLE AND DNA PROCESSING SUBCELLULAR LOCALISATION                                                                 |                                     |
| CA1392 | 1.1 | 1.2 | 1.0 | 0.9 | 1.1 | 1.0 | IPF6149     | 5944903..5.similar to Saccharomyces cerevisiae          | orf19.1767  | 6149  | IPF6149      | PROTEIN FATE [folding modification destination]                                                                        | peptidase activity                  |
| CA1393 | 0.9 | 1.0 | 1.0 | 1.1 | 1.0 | 1.0 | IFO3        | 5948144..5.Similar to Streptomyces coelicolor           | orf19.1766  | 6146  | CaIFO3       | CELL FATE                                                                                                              |                                     |
| CA1394 | 1.0 | 1.1 | 1.0 | 1.0 | 1.0 | 1.0 | IFO2        | 5952440..5.unknown function                             | orf19.9334  | 19560 | CaIFO2       | UNCLASSIFIED PROTEINS                                                                                                  |                                     |
| CA1395 | 1.0 | 1.1 | 1.0 | 1.0 | 1.0 | 1.1 | IPF17558    | 5956966..5.unknown function                             | orf19.9332  | 17558 | IPF17558     | SUBCELLULAR LOCALISATION                                                                                               |                                     |
| CA1396 | 0.9 | 1.0 | 1.1 | 1.0 | 1.0 | 1.0 | IPF8075     | 5961207..5.unknown function                             | orf19.3701  | 8075  | IPF8075      | UNCLASSIFIED PROTEINS                                                                                                  | molecular_function unknown          |
| CA1397 | 1.0 | 0.9 | 1.0 | 0.9 | 1.0 | 1.1 | TOM72       | 5963697..5.mitochondrial import receptor (by homology)  | orf19.3700  | 8073  | CaTOM72      | PROTEIN FATE [folding modification destination] ""CELLULAR TRANSPORT AND TRANSPORT MECHANISMS SUBCELLULAR LOCALISATION | transporter activity                |
| CA1398 | 0.9 | 0.9 | 1.0 | 1.1 | 1.1 | 0.9 | IPF19913    | 5965945..5.unknown function                             | orf19.3699  | 19913 | IPF19913     | CELLULAR COMMUNICATION/SIGNAL TRANSDUCTION MECHANISMS SUBCELLULAR LOCALISATION                                         | hydrolase activity                  |
| CA1399 | 1.0 | 0.9 | 1.0 | 1.0 | 1.0 | 1.0 | IPF8069     | complemer unknown function                              | orf19.3698  | 8069  | IPF8069      | UNCLASSIFIED PROTEINS                                                                                                  | molecular_function unknown          |
| CA1400 | 1.0 | 1.0 | 1.0 | 0.9 | 0.9 | 1.0 | IPF8067     | 5968669..5.unknown function                             | orf19.3697  | 8067  | IPF8067      | UNCLASSIFIED PROTEINS                                                                                                  | molecular_function unknown          |
| CA1401 | 1.0 | 0.9 | 1.0 | 1.1 | 1.0 | 1.0 | TOM22       | 5971836..5.mitochondrial outer membrane import          | orf19.3696  | 8066  | CaTOM22      | PROTEIN FATE [folding modification destination] ""CELLULAR TRANSPORT AND TRANSPORT MECHANISMS SUBCELLULAR LOCALISATION | transporter activity                |
| CA1402 | 0.1 | 0.2 | 0.5 | 0.3 | 0.3 | 0.2 | ECE1        | 5996321..5.Cell Elongation Protein                      | orf19.3374  | 14152 | CaECE1       | Hypha-specific No significant S.c. match                                                                               |                                     |
| CA1403 | 0.9 | 1.0 | 0.9 | 0.9 | 0.9 | 0.9 | IPF14155    | 5997783..5.similar to Saccharomyces cerevisiae          | orf19.3373  | 14155 | IPF14155     | CELL CYCLE AND DNA PROCESSING CELL FATE                                                                                | RNA binding                         |
| CA1404 | 1.0 | 1.0 | 1.0 | 1.0 | 1.0 | 1.1 | IPF19554.5F | 5999907..6.unknown function, 5-prime end                | orf19.3372  | 19554 | IPF19554.5F  | UNCLASSIFIED PROTEINS                                                                                                  | peptidase activity                  |
| CA1405 | 0.9 | 0.9 | 1.1 | 1.0 | 1.0 | 0.9 | IPF19554.3F | 6000571..6.unknown function, 3-prime end                | orf19.3371  | 15627 | IPF19554.3F  | No significant S.c. match                                                                                              |                                     |
| CA1406 | 1.0 | 1.1 | 1.0 | 1.0 | 1.0 | 0.9 | DOT4        | 6002515..6.derepression of telomeric silencing          | orf19.3370  | 15624 | CaDOT4       | TRANSCRIPTION ""PROTEIN FATE [folding modification destination] ""                                                     | peptidase activity                  |
| CA1407 | 1.0 | 1.0 | 1.0 | 1.0 | 1.1 | 0.9 | UAPC        | 6017274..6.purine permease (by homology)                | orf19.2882  | 10516 | CaUAPC       | No significant S.c. match                                                                                              |                                     |
| CA1408 | 1.0 | 1.0 | 0.9 | 1.1 | 1.0 | 0.9 | IPF10513    | 6020500..6.unknown function                             | orf19.2883  | 10513 | IPF10513     | No significant S.c. match                                                                                              |                                     |
| CA1409 | 0.9 | 1.0 | 0.9 | 1.0 | 1.1 | 1.1 | SPT16       | complemer general chromatin factor (by homology)        | orf19.2884  | 10512 | CaSPT16      | CELL CYCLE AND DNA PROCESSING SUBCELLULAR LOCALISATION                                                                 | transcription regulator activity    |
| CA1410 | 0.9 | 1.0 | 1.0 | 1.0 | 1.1 | 1.0 | GAT1        | 6031344..6.nitrogen regulation (by homology)            | orf19.1275  | 12290 | CaGAT1       | Nitrogen and sulphur metabolism TRANSCRIPTION SUBCELLULAR LOCALISATION                                                 | transcription regulator activity    |
| CA1411 | 1.1 | 0.9 | 0.8 | 0.7 | 0.9 | 0.7 | IPF11858    | complemer unknown function                              | orf19.1277  | 11858 | IPF11858     | No significant S.c. match                                                                                              |                                     |
| CA1412 | 0.9 | 1.0 | 0.9 | 1.0 | 1.0 | 0.9 | IPF11854    | complemer unknown function                              | orf19.1278  | 11854 | IPF11854     | No significant S.c. match                                                                                              |                                     |
| CA1413 | 1.0 | 1.0 | 1.0 | 0.9 | 1.0 | 1.0 | MTR3        | 6040777..6Involved in mRNA transport (by homology)      | orf19.1268  | 16693 | CaMTR3       | TRANSCRIPTION SUBCELLULAR LOCALISATION                                                                                 | RNA binding                         |
| CA1414 | 1.0 | 1.0 | 1.0 | 1.0 | 1.0 | 1.0 | CHO2        | complemer phosphatidylethanolamine N-methyltransferase  | orf19.169   | 19594 | CaCHO2       | Lipid fatty-acid and isoprenoid metabolism ""SUBCELLULAR LOCALISATION                                                  | transferase activity                |
| CA1415 | 0.9 | 1.0 | 1.0 | 0.8 | 0.9 | 1.0 | DBP2.EXON2  | complemer ATP-dependent RNA helicase of                 | orf19.170   | 18681 | CaDBP2.exon2 | TRANSCRIPTION SUBCELLULAR LOCALISATION                                                                                 |                                     |
| CA1416 | 1.0 | 1.0 | 1.0 | 1.0 | 1.1 | 1.0 | DBP2.EXON1  | complemer ATP-dependent RNA helicase of                 | orf19.171   | 17362 | CaDBP2.exon1 | TRANSCRIPTION SUBCELLULAR LOCALISATION                                                                                 | RNA binding,helicase activity       |
| CA1417 | 1.0 | 1.0 | 1.0 | 1.0 | 1.0 | 0.9 | IPF16126    | complemer similar to Saccharomyces cerevisiae           | orf19.172   | 16126 | IPF16126     | TRANSCRIPTION SUBCELLULAR LOCALISATION                                                                                 | nucleotidyltransferase activity     |
| CA1418 | 1.0 | 1.0 | 1.0 | 0.9 | 1.0 | 1.0 | IPF16124    | complemer zinc-finger containing protein (by homology)  | orf19.173   | 16124 | IPF16124     | TRANSCRIPTION SUBCELLULAR LOCALISATION                                                                                 | DNA binding                         |
| CA1419 | 1.0 | 1.0 | 0.9 | 1.1 | 1.1 | 1.1 | IPF17296    | complemer unknown function                              | orf19.175   | 17296 | IPF17296     | CELL CYCLE AND DNA PROCESSING SUBCELLULAR LOCALISATION                                                                 |                                     |
| CA1420 | 1.0 | 1.0 | 1.0 | 1.1 | 1.0 | 1.1 | RNT1        | complemer Ribonuclease III (by homology)                | orf19.1127  | 14250 | CaRNT1       | TRANSCRIPTION SUBCELLULAR LOCALISATION                                                                                 | RNA binding                         |
| CA1421 | 1.0 | 1.1 | 1.0 | 1.1 | 1.0 | 1.1 | MRPL11      | 6063038..6.Mitochondrial ribosomal protein (b)          | orf19.11271 | 14249 | CaMRPL11     | PROTEIN SYNTHESIS SUBCELLULAR LOCALISATION                                                                             | structural molecule activity        |
| CA1422 | 1.0 | 1.0 | 1.0 | 1.0 | 1.0 | 1.1 | IPF14248    | 6064228..6.putative methyltransferase (by homology)     | orf19.3798  | 14248 | IPF14248     | UNCLASSIFIED PROTEINS                                                                                                  | protein binding                     |
| CA1423 | 0.9 | 1.0 | 1.0 | 1.0 | 1.1 | 1.0 | IPF14247    | complemer unknown function                              | orf19.3799  | 14247 | IPF14247     | CELLULAR LOCALISATION                                                                                                  | molecular_function unknown          |

|        |     |     |     |     |     |     |              |                                                          |             |                  |                                                                                  |                                       |
|--------|-----|-----|-----|-----|-----|-----|--------------|----------------------------------------------------------|-------------|------------------|----------------------------------------------------------------------------------|---------------------------------------|
| CA1424 | 1.1 | 1.0 | 1.0 | 1.0 | 1.0 | 1.0 | IPF9090      | complemer unknown function                               | orf19.1128; | 9090 IPF9090     | No significant S.c. match                                                        |                                       |
| CA1426 | 1.0 | 1.0 | 1.1 | 1.0 | 1.1 | 1.0 | ALS11.3F     | 6081393..6agglutinin-like protein, 3-prime encor         | orf19.1316f | 9917 CaALS11.3F  | SUBCELLULAR LOCALISATION Other virulence attributes                              |                                       |
| CA1427 | 1.0 | 1.1 | 1.0 | 1.1 | 0.9 | 1.0 | IPF9914      | 6084925..6alanyl-tRNA synthetase (by homol               | orf19.5746  | 9914 IPF9914     | PROTEIN SYNTHESIS SUBCELLULAR LOCALISATION                                       | ligase activity                       |
| CA1428 | 1.0 | 1.1 | 1.0 | 1.1 | 1.0 | 1.0 | MRP4         | complemer Ribosomal protein of the small sub             | orf19.1317f | 15124 CaMRP4     | PROTEIN SYNTHESIS SUBCELLULAR LOCALISATION                                       | RNA binding,structural molecule ac    |
| CA1429 | 1.0 | 1.0 | 0.9 | 1.0 | 0.9 | 1.0 | IPF15123     | 6089555..6 unknown function                              | orf19.1317  | 15123 IPF15123   | No significant S.c. match                                                        |                                       |
| CA1430 | 1.0 | 0.9 | 1.1 | 1.0 | 1.0 | 0.9 | IPF14331     | 6096149..6Probable extracellular alpha-1,4-gl            | orf19.3380  | 14331 IPF14331   | No significant S.c. match                                                        |                                       |
| CA1431 | 0.9 | 0.4 | 0.8 | 1.3 | 1.1 | 0.9 | FET34.3EOC   | 6109997..6iron transport multicopper oxidase             | orf19.1206  | 12467 CaFET34.3  | CELLULAR TRANSPORT AND TRANSPORT MECHANISMS REGULATION OF/INTERACTION WITH CEI   |                                       |
| CA1432 | 1.0 | 1.0 | 1.0 | 0.9 | 1.0 | 1.0 | APM3         | 6111900..6AP-3 complex subunit, mu3 subun                | orf19.1204  | 12465 CaAPM3     | CELLULAR TRANSPORT AND TRANSPORT MECHANISMS                                      | molecular_function unknown            |
| CA1433 | 1.0 | 1.1 | 1.0 | 0.9 | 1.0 | 0.9 | IPF12464     | complemer unknown function                               |             | 12464 IPF12464   | No significant S.c. match                                                        |                                       |
| CA1434 | 1.1 | 1.1 | 1.1 | 1.0 | 1.0 | 1.0 | SNI2         | 6114195..6Sec9 interacting protein (by homol             | orf19.1203  | 12463 CaSNI2     | CELLULAR TRANSPORT AND TRANSPORT MECHANISMS CELL FAT                             | molecular_function unknown            |
| CA1435 | 1.0 | 1.0 | 1.0 | 1.0 | 1.1 | 0.9 | IPF7166      | 6117655..6 unknown function                              | orf19.1202  | 7166 IPF7166     | CELLULAR TRANSPORT AND TRANSPORT MECHANISMS SUBCELLULAR LOCALISATION             |                                       |
| CA1436 | 1.1 | 1.0 | 1.0 | 1.0 | 1.0 | 0.9 | IPF7165      | complemer similar to Saccharomyces cerevisi              | orf19.1201  | 7165 IPF7165     | PROTEIN SYNTHESIS                                                                | ligase activity                       |
| CA1437 | 1.0 | 1.0 | 0.9 | 1.0 | 1.0 | 0.9 | IPF7163      | 6120582..6 unknown function                              | orf19.1200  | 7163 IPF7163     | No significant S.c. match                                                        |                                       |
| CA1438 | 1.0 | 1.0 | 1.1 | 1.1 | 1.0 | 1.2 | NOP58        | 6122042..6 nucleolar protein required for pre-1          | orf19.1199  | 7161 CaNOP58     | TRANSCRIPTION SUBCELLULAR LOCALISATION                                           | molecular_function unknown            |
| CA1439 | 1.1 | 1.0 | 1.0 | 1.1 | 1.1 | 1.2 | IPF19602     | complemer similar to Saccharomyces cerevisi              | orf19.4488  | 19602 IPF19602   | C-compound and carbohydrate metabolism TRANSCRIPTION CELL FA                     | transcription regulator activity      |
| CA1440 | 0.9 | 1.1 | 1.1 | 1.2 | 1.0 | 1.2 | RPL17B       | 6132795..6RPL17B ribosomal protein L17.e                 | orf19.4490  | 4772 CaRPL17B    | PROTEIN SYNTHESIS SUBCELLULAR LOCALISATION                                       | structural molecule activity          |
| CA1441 | 1.0 | 1.0 | 0.9 | 1.0 | 1.0 | 0.9 | QCR8         | 6134541..6ubiquinol-cytochrome-c reductase chain VIII (t |             | 4774 CaQCR8      | ENERGY SUBCELLULAR LOCALISATION                                                  | transporter activity,oxidoreductase   |
| CA1442 | 1.1 | 0.9 | 1.0 | 1.0 | 1.1 | 1.0 | ERG20        | complemer farnesyl-pyrophosphate synthetase              | orf19.4491  | 4775 CaERG20     | Lipid fatty-acid and isoprenoid metabolism ""SUBCELLULAR LOCALISA                | transferase activity                  |
| CA1443 | 1.1 | 1.0 | 1.1 | 1.0 | 1.0 | 1.1 | IPF4776      | complemer unknown Function                               | orf19.4492  | 4776 IPF4776     | TRANSCRIPTION                                                                    | molecular_function unknown            |
| CA1444 | 1.0 | 1.0 | 1.0 | 1.0 | 1.0 | 1.0 | KTR2         | complemer mannosyltransferase (by homolog                | orf19.4494  | 4778 CaKTR2      | C-compound and carbohydrate metabolism SUBCELLULAR LOCALISA                      | transferase activity                  |
| CA1445 | 1.0 | 1.0 | 0.9 | 1.0 | 1.0 | 1.1 | MRP51        | 6142233..6Mitochondrial ribosomal protein of             | orf19.185   | 13417 CaMRP51    | PROTEIN SYNTHESIS SUBCELLULAR LOCALISATION                                       | structural molecule activity          |
| CA1446 | 1.1 | 1.1 | 1.0 | 0.9 | 1.0 | 1.0 | YAL011       | complemer mitochondrial transit peptide (by ho           | orf19.190   | 15052 CaYAL011   | SUBCELLULAR LOCALISATION                                                         |                                       |
| CA1447 | 1.0 | 1.0 | 1.0 | 1.0 | 1.0 | 1.0 | NRK1         | complemer Cdc31p-interacting ser/thr protein             | orf19.191   | 15055 CaNRK1     | CELL CYCLE AND DNA PROCESSING CONTROL OF CELLULAR ORGANIZATION                   |                                       |
| CA1448 | 1.0 | 1.0 | 1.0 | 1.0 | 1.1 | 1.0 | IPF14728     | complemer unknown function                               | orf19.192   | 14728 IPF14728   | No significant S.c. match                                                        |                                       |
| CA1449 | 1.0 | 1.1 | 1.0 | 1.0 | 0.9 | 0.8 | IPF14730.5EC | 6153650..6 unknown function, 5-prime end                 | orf19.193   | 14730 IPF14730.5 | No significant S.c. match                                                        |                                       |
| CA1450 | 1.0 | 0.9 | 1.0 | 1.1 | 1.0 | 1.0 | IPF6474      | complemer unknown function                               | orf19.4414  | 6474 IPF6474     | TRANSCRIPTION SUBCELLULAR LOCALISATION                                           |                                       |
| CA1452 | 1.0 | 1.0 | 1.1 | 1.0 | 0.9 | 1.0 | REV1         | 6158529..6DNA repair protein (by homology)               | orf19.4412  | 6472 CaREV1      | CELL CYCLE AND DNA PROCESSING                                                    | nucleotidyltransferase activity       |
| CA1453 | 0.9 | 1.0 | 0.9 | 1.1 | 1.0 | 1.0 | HOS1         | 6162044..6Putative histon deacetylase (by ho             | orf19.4411  | 6469 CaHOS1      | TRANSCRIPTION                                                                    | hydrolase activity                    |
| CA1454 | 1.1 | 1.1 | 1.0 | 1.1 | 1.0 | 0.9 | ALG1         | complemer beta-1,4-mannosyltransferase (by               | orf19.4410  | 19918 CaALG1     | C-compound and carbohydrate metabolism ""PROTEIN FATE [folding m                 | transferase activity                  |
| CA1455 | 1.0 | 1.1 | 1.1 | 1.0 | 0.9 | 1.0 | IPF15081     | 6165189..6phosphodiesterase (by homology)                | orf19.4409  | 15081 IPF15081   | UNCLASSIFIED PROTEINS                                                            | molecular_function unknown            |
| CA1456 | 1.1 | 1.0 | 1.0 | 1.0 | 1.0 | 0.9 | IPF11835.3EC | complemer unknown function                               |             | 15083 IPF11835.3 | No significant S.c. match                                                        |                                       |
| CA1457 | 1.0 | 1.0 | 1.1 | 0.9 | 0.9 | 0.9 | IPF8287      | 6171083..6 unknown function                              | orf19.612   | 8287 IPF8287     | UNCLASSIFIED PROTEINS                                                            | molecular_function unknown            |
| CA1458 | 1.3 | 0.5 | 3.5 | 2.1 | 1.7 | 2.9 | IPF6342      | 6191478..6 unknown function                              | orf19.1106  | 6342 IPF6342     | No significant S.c. match                                                        |                                       |
| CA1459 | 1.1 | 1.1 | 1.0 | 1.1 | 1.0 | 1.0 | IPF6340      | 6194741..6 unknown function                              | orf19.1107  | 6340 IPF6340     | UNCLASSIFIED PROTEINS                                                            |                                       |
| CA1460 | 1.0 | 0.9 | 1.0 | 1.0 | 1.0 | 1.0 | HAM1         | complemer Controls 6-N-hydroxylaminopurine               | orf19.1108  | 6339 CaHAM1      | CELL RESCUE DEFENSE AND VIRULENCE                                                | molecular_function unknown            |
| CA1461 | 1.0 | 1.0 | 1.0 | 1.0 | 1.0 | 0.9 | IPF6338      | complemer unknown function                               | orf19.1109  | 6338 IPF6338     | No significant S.c. match                                                        |                                       |
| CA1462 | 0.9 | 1.0 | 1.1 | 1.1 | 1.0 | 1.0 | THI80        | complemer Thiamin pyrophosphokinase (by ho               | orf19.8707  | 6335 CaTHI80     | Metabolism of vitamins cofactors and prosthetic groups                           | transferase activity                  |
| CA1464 | 1.0 | 1.0 | 1.0 | 1.2 | 1.1 | 1.2 | PYC2.EXON2   | 6201408..6Pyruvate carboxylase 2 (by homol               | orf19.789   | 15167 CaPYC2.e   | C-compound and carbohydrate metabolism ENERGY SUBCELLULAR L                      | ligase activity                       |
| CA1465 | 1.0 | 1.0 | 1.0 | 1.0 | 0.9 | 1.0 | RIM11        | complemer Ser/thr protein kinase (by homolog             | orf19.791   | 18668 CaRIM11    | CELL CYCLE AND DNA PROCESSING TRANSCRIPTION SUBCELLULAR LOCALISATION             |                                       |
| CA1466 | 1.1 | 1.3 | 1.0 | 1.1 | 1.0 | 1.0 | IPF13324     | complemer unknown function                               | orf19.8411  | 13324 IPF13324   | No significant S.c. match                                                        |                                       |
| CA1467 | 1.0 | 1.0 | 1.1 | 1.0 | 1.0 | 0.9 | IPF5082      | complemer similar to Saccharomyces cerevisi              | orf19.8412  | 5082 IPF5082     | CELL CYCLE AND DNA PROCESSING                                                    | protein kinase activity               |
| CA1468 | 0.9 | 0.9 | 1.0 | 0.9 | 0.9 | 1.0 | SRB10        | complemer cyclin-dependent kinase by homol               | orf19.794   | 5080 CaSRB10     | C-compound and carbohydrate metabolism CELL CYCLE AND DNA PR                     | protein kinase activity,transcription |
| CA1469 | 1.0 | 1.0 | 1.0 | 1.0 | 1.0 | 1.0 | IPF5078      | complemer unknown function                               | orf19.8414  | 5078 IPF5078     | PROTEIN FATE [folding modification destination]                                  | signal transducer activity            |
| CA1470 | 1.0 | 0.9 | 1.0 | 1.0 | 1.1 | 0.9 | IPF17942     | 6214621..6 unknown function                              | orf19.8415  | 17942 IPF17942   | CELL FATE                                                                        | transcription regulator activity      |
| CA1471 | 1.0 | 0.9 | 1.0 | 1.1 | 1.0 | 1.1 | ALS2.3FEOC   | complemer agglutinin-like protein, 3-prime encor         | orf19.1098  | 15450 CaALS2.3f  | SUBCELLULAR LOCALISATION Other virulence attributes                              |                                       |
| CA1474 | 1.0 | 0.9 | 1.0 | 1.0 | 1.0 | 0.9 | IPF10208     | complemer chloride channel-like protein (by ho           | orf19.1096  | 10208 IPF10208   | CELLULAR TRANSPORT AND TRANSPORT MECHANISMS REGULATION OF/INTERACTION WITH CEI   |                                       |
| CA1475 | 1.0 | 1.0 | 1.0 | 1.1 | 1.1 | 0.9 | GLE2         | 6231541..6nuclear pore complex structure an              | orf19.1095  | 10209 CaGLE2     | TRANSCRIPTION CELLULAR TRANSPORT AND TRANSPORT MECH                              | structural molecule activity          |
| CA1476 | 1.0 | 1.0 | 1.0 | 1.0 | 1.0 | 1.1 | IPF10214     | 6235149..6 unknown function                              | orf19.1093  | 10214 IPF10214   | No significant S.c. match                                                        |                                       |
| CA1477 | 1.0 | 0.9 | 1.1 | 0.9 | 1.0 | 1.0 | YME1         | complemer family of ATPases                              | orf19.1252  | 14644 CaYME1     | PROTEIN FATE [folding modification destination] ""SUBCELLULAR LOC                | peptidase activity                    |
| CA1478 | 0.9 | 0.9 | 1.0 | 1.0 | 1.0 | 1.0 | IPF16426     | 6245915..6similar to human BRRN1 (by hom                 | orf19.1251  | 16426 IPF16426   | CELL CYCLE AND DNA PROCESSING                                                    | molecular_function unknown            |
| CA1479 | 1.0 | 1.0 | 1.0 | 1.0 | 1.1 | 1.1 | IPF16428     | complemer unknown function                               | orf19.1250  | 16428 IPF16428   | UNCLASSIFIED PROTEINS                                                            | molecular_function unknown            |
| CA1480 | 0.9 | 1.1 | 1.0 | 1.0 | 1.0 | 1.0 | HIS6         | 6249378..65 Pro-FAR isomerase                            | orf19.1249  | 15577 CaHIS6     | Amino acid metabolism UNCLASSIFIED PROTEINS                                      | isomerase activity                    |
| CA1481 | 1.0 | 1.0 | 1.0 | 1.0 | 1.0 | 1.0 | RPB3         | complemer DNA-directed RNA-polymerase II                 | orf19.8832  | 15576 CaRPB3     | TRANSCRIPTION SUBCELLULAR LOCALISATION                                           | nucleotidyltransferase activity       |
| CA1482 | 1.0 | 1.1 | 1.1 | 1.0 | 1.0 | 0.9 | IPF15575     | 6251477..6 unknown function                              | orf19.8831  | 15575 IPF15575   | No significant S.c. match                                                        |                                       |
| CA1483 | 1.0 | 1.0 | 0.9 | 1.0 | 1.1 | 0.9 | YHC3         | complemer involved in cellular pH homeostasi             | orf19.4059  | 10526 CaYHC3     | CLASSIFICATION NOT YET CLEAR-CUT                                                 | molecular_function unknown            |
| CA1484 | 1.0 | 1.0 | 1.0 | 0.9 | 1.0 | 1.0 | ARO4         | 6259877..63-dehydro-deoxyphosphoheptonat                 | orf19.4060  | 10524 CaARO4     | Amino acid metabolism SUBCELLULAR LOCALISATION                                   | transferase activity                  |
| CA1485 | 0.9 | 1.0 | 1.0 | 1.1 | 1.0 | 1.0 | IPF20082     | complemer unknown function                               | orf19.4061  | 20082 IPF20082   | UNCLASSIFIED PROTEINS                                                            | molecular_function unknown            |
| CA1486 | 1.0 | 1.1 | 1.0 | 0.9 | 1.0 | 1.0 | IPF10521     | complemer unknown function                               | orf19.4062  | 10521 IPF10521   | No significant S.c. match                                                        |                                       |
| CA1487 | 1.1 | 1.1 | 1.1 | 1.0 | 0.9 | 1.1 | GPT1         | complemer polyamine transporter PUTATIVE                 | orf19.4063  | 10519 CaGPT1     | No significant S.c. match                                                        |                                       |
| CA1488 | 1.1 | 1.1 | 1.0 | 1.0 | 1.0 | 1.0 | IPF17402     | 6267628..6 unknown function                              | orf19.4064  | 17402 IPF17402   | SUBCELLULAR LOCALISATION UNCLASSIFIED PROTEINS                                   | transferase activity                  |
| CA1489 | 1.2 | 1.1 | 0.9 | 0.8 | 1.0 | 1.2 | ATP3.3       | complemer F1F0-ATPase complex, F1 gamm                   | orf19.1073  | 163 CaATP3.3     | ENERGY CELLULAR TRANSPORT AND TRANSPORT MECHANISMS                               | transporter activity                  |
| CA1490 | 1.0 | 0.9 | 1.0 | 0.9 | 1.0 | 1.0 | IPF165       | complemer unknown function                               |             | 165 IPF165       | No significant S.c. match                                                        |                                       |
| CA1491 | 1.1 | 1.0 | 1.0 | 1.0 | 1.0 | 1.0 | IPF166       | 6273822..6 unknown function                              | orf19.3225  | 166 IPF166       | TRANSPORT FACILITATION                                                           | molecular_function unknown            |
| CA1492 | 1.2 | 1.1 | 1.0 | 1.0 | 1.0 | 1.1 | IPF168       | 6277773..6 unknown function                              | orf19.3226  | 168 IPF168       | UNCLASSIFIED PROTEINS                                                            | molecular_function unknown            |
| CA1493 | 1.0 | 1.1 | 1.0 | 1.0 | 1.0 | 1.1 | FTH2         | 6279115..6iron transporter (by homology)                 | orf19.3227  | 170 CaFTH2       | REGULATION OF/INTERACTION WITH CELLULAR ENVIRONMENT TRANSPORT FACILITATION Other |                                       |
| CA1494 | 1.0 | 0.9 | 1.0 | 0.9 | 0.9 | 1.0 | IPF171       | complemer unknown function                               | orf19.3228  | 171 IPF171       | UNCLASSIFIED PROTEINS                                                            | molecular_function unknown            |
| CA1495 | 1.1 | 1.1 | 1.0 | 1.0 | 1.0 | 1.0 | IPF9686      | 6289847..6similar to Saccharomyces cerevisi              | orf19.3647  | 9686 IPF9686     | CELLULAR TRANSPORT AND TRANSPORT MECHANISMS SUBCELL                              | protein binding                       |
| CA1496 | 0.4 | 0.7 | 1.0 | 1.0 | 0.9 | 1.1 | CTR1         | complemer copper transport protei copper tran            | orf19.3646  | 9685 CaCTR1      | CELLULAR TRANSPORT AND TRANSPORT MECHANISMS REGULA                               | transporter activity                  |
| CA1497 | 1.0 | 1.0 | 1.0 | 1.0 | 1.1 | 1.0 | IPF9683      | complemer unknown function                               | orf19.3644  | 9683 IPF9683     | TRANSCRIPTION                                                                    |                                       |
| CA1498 | 1.0 | 1.1 | 1.0 | 1.0 | 1.1 | 1.0 | IPF12371     | complemer extracellular alpha-1,4-glucan gluc            | orf19.3643  | 12371 IPF12371   | TRANSCRIPTION                                                                    |                                       |
| CA1499 | 1.2 | 1.1 | 1.1 | 1.0 | 1.0 | 1.0 | IPF6521.3EOC | 6303710..6similar to Saccharomyces cerevisiae            | Tao3p tr    | 13224 IPF6521.3e | TRANSCRIPTION SUBCELLULAR LOCALISATION                                           |                                       |
| CA1500 | 1.0 | 1.0 | 1.0 | 0.9 | 1.1 | 0.8 | IPF13221     | 6308626..6 unknown function                              | orf19.1697  | 13221 IPF13221   | UNCLASSIFIED PROTEINS                                                            | molecular_function unknown            |

|        |     |     |     |     |     |     |              |                                                 |            |       |              |                                                                                           |                                                                                    |
|--------|-----|-----|-----|-----|-----|-----|--------------|-------------------------------------------------|------------|-------|--------------|-------------------------------------------------------------------------------------------|------------------------------------------------------------------------------------|
| CA1501 | 1.0 | 1.0 | 1.1 | 0.9 | 0.9 | 0.9 | IPF13217     | complemer unknown function                      | orf19.9265 | 13217 | IPF13217     | UNCLASSIFIED PROTEINS                                                                     | molecular_function unknown                                                         |
| CA1502 | 1.1 | 1.6 | 0.9 | 0.8 | 1.0 | 1.1 | RPS7A        | complemer ribosomal protein (by homology)       | orf19.9267 | 13662 | CaRPS7A      | PROTEIN SYNTHESIS SUBCELLULAR LOCALISATION                                                | structural molecule activity                                                       |
| CA1503 | 1.1 | 1.0 | 0.9 | 1.0 | 0.9 | 1.0 | RK11         | 6315794..6 D-ribose-5-phosphate ketol-isome     | orf19.9268 | 13663 | CaRK11       | C-compound and carbohydrate metabolism                                                    | ENERGY SUBCELLULAR LOCALISATION isomerase activity                                 |
| CA1504 | 1.0 | 1.0 | 1.0 | 1.1 | 0.9 | 1.2 | ARF3         | complemer GTP-binding protein of the ARF fa     | orf19.1702 | 13664 | CaARF3       | PROTEIN FATE [folding modification destination]                                           | ""CELLULAR TRANSPORT AND TRANSPORT MECHANISMS SUBCELLULAR LOCALISATION             |
| CA1505 | 1.0 | 1.1 | 1.0 | 1.0 | 0.9 | 1.0 | POT1         | 6319848..6 Acetyl-CoA C-acyltransferase, per    | orf19.9271 | 17552 | CaPOT1       | Lipid fatty-acid and isoprenoid metabolism                                                | ""ENERGY SUBCELLULAR LOCALISATION                                                  |
| CA1506 | 1.0 | 0.9 | 0.9 | 0.8 | 1.0 | 1.0 | HGT11        | 6323821..6 hexose transporter hexose trar       | orf19.4527 | 9983  | CaHGT11      | C-compound and carbohydrate metabolism                                                    | TRANSPORT FACILITATION molecular_function unknown                                  |
| CA1507 | 1.0 | 1.0 | 1.0 | 1.0 | 1.0 | 1.0 | HSP30        | 6328488..6 heat shock protein (by homology)     | orf19.4526 | 9978  | CaHSP30      | CELL RESCUE DEFENSE AND VIRULENCE                                                         | ""REGULATION OF/INTEIN chaperone activity                                          |
| CA1508 | 1.0 | 1.0 | 1.1 | 0.9 | 1.0 | 0.9 | IPF9977      | 6329966..6 unknown function                     | orf19.4525 | 9977  | IPF9977      | UNCLASSIFIED PROTEINS                                                                     | molecular_function unknown                                                         |
| CA1509 | 1.0 | 1.0 | 1.0 | 1.0 | 1.0 | 1.0 | IPF19920.3   | complemer unknown function, 3-prime end         | orf19.4524 | 19920 | IPF19920.3   | Amino acid metabolism TRANSCRIPTION SUBCELLULAR LOCALISATION                              |                                                                                    |
| CA1510 | 1.0 | 1.0 | 1.0 | 0.9 | 1.0 | 1.0 | IPF9973      | 6333605..6 similar to Saccharomyces cerevisi    | orf19.4523 | 9973  | IPF9973      | Metabolism of vitamins cofactors and prosthetic groups                                    | ligase activity                                                                    |
| CA1511 | 1.1 | 1.0 | 1.0 | 1.0 | 1.0 | 1.0 | IPF9972.3EOC | complemer unknown function, 3-prime end         | orf19.4522 | 9972  | IPF9972.3EOC | ENERGY                                                                                    | molecular_function unknown                                                         |
| CA1512 | 0.9 | 0.9 | 1.1 | 1.0 | 1.0 | 0.9 | IPF15255     | 6341070..6 unknown function                     | orf19.4884 | 15255 | IPF15255     | CLASSIFICATION NOT YET CLEAR-CUT                                                          | molecular_function unknown                                                         |
| CA1513 | 1.1 | 1.1 | 1.0 | 1.1 | 0.9 | 1.1 | MIR1         | 6346913..6 phosphate transport protein, mitoc   | orf19.4885 | 7536  | CaMIR1       | Phosphate metabolism CELLULAR TRANSPORT AND TRANSPORT MECHANISMS SUBCELLULAR LOCALISATION | transporter activity                                                               |
| CA1514 | 1.0 | 1.0 | 1.1 | 1.0 | 1.0 | 1.0 | IPF7539      | 6349709..6 unknown function                     | orf19.4886 | 7539  | IPF7539      | No significant S.c. match                                                                 |                                                                                    |
| CA1515 | 1.0 | 1.0 | 1.0 | 1.0 | 1.0 | 0.9 | ECM21.3      | complemer Involved in cell wall biogenesis an   | orf19.1235 | 18663 | CaECM21.3    | CONTROL OF CELLULAR ORGANIZATION                                                          | molecular_function unknown                                                         |
| CA1516 | 1.0 | 1.0 | 1.0 | 1.0 | 1.1 | 1.0 | IPF16764     | 6355294..6 unknown function                     | orf19.4796 | 16764 | IPF16764     | PROTEIN SYNTHESIS SUBCELLULAR LOCALISATION                                                |                                                                                    |
| CA1517 | 1.0 | 1.0 | 1.0 | 1.0 | 0.9 | 1.1 | IPF11045     | complemer unknown function                      | orf19.4798 | 11045 | IPF11045     | UNCLASSIFIED PROTEINS                                                                     | molecular_function unknown                                                         |
| CA1518 | 1.1 | 1.0 | 1.0 | 1.0 | 1.0 | 1.2 | IPF11040     | 6360312..6 similar to Schizosaccharomyces por   | orf19.4799 | 11040 | IPF11040     | CELL CYCLE AND DNA PROCESSING                                                             | RNA binding                                                                        |
| CA1519 | 1.0 | 1.0 | 1.1 | 1.1 | 1.0 | 1.0 | RIM20        | 6362353..6 Rim101 activating protein            | orf19.4800 | 11037 | CaRIM20      | UNCLASSIFIED PROTEINS                                                                     | molecular_function unknown                                                         |
| CA1520 | 1.0 | 1.0 | 1.0 | 1.0 | 1.0 | 1.0 | IPF11035     | 6364914..6 similar to Saccharomyces cerevisi    | orf19.4801 | 11035 | IPF11035     | TRANSCRIPTION SUBCELLULAR LOCALISATION                                                    | transferase activity                                                               |
| CA1521 | 1.0 | 1.0 | 1.0 | 0.9 | 1.0 | 1.0 | FTH1         | complemer iron transporter                      | orf19.4802 | 11034 | CaFTH1       | REGULATION OF/INTERACTION WITH CELLULAR ENVIRONMENT                                       | ""molecular_function unknown                                                       |
| CA1522 | 1.0 | 1.0 | 1.1 | 1.1 | 1.0 | 1.0 | IPF6916      | complemer unknown function                      | orf19.3791 | 6916  | IPF6916      | No significant S.c. match                                                                 |                                                                                    |
| CA1523 | 1.1 | 1.1 | 1.0 | 1.0 | 1.1 | 1.0 | PAT1         | 6372742..6 Topoisomerase II-associated prote    | orf19.3792 | 6915  | CaPAT1       | CELL CYCLE AND DNA PROCESSING TRANSCRIPTION SUBCELLULAR LOCALISATION                      | molecular_function unknown                                                         |
| CA1524 | 1.0 | 1.0 | 1.0 | 1.0 | 1.1 | 1.0 | SUR1         | 6380868..6 Suppressor of ROK1 suppressor        | orf19.3794 | 6909  | CaSUR1       | TRANSCRIPTION SUBCELLULAR LOCALISATION                                                    | DNA binding                                                                        |
| CA1525 | 0.9 | 0.9 | 1.0 | 0.9 | 1.0 | 1.0 | AGP3         | 6383816..6 amino acid-permease (by homolo       | orf19.3795 | 6906  | CaAGP3       | Amino acid metabolism TRANSPORT FACILITATION                                              | transporter activity                                                               |
| CA1526 | 1.0 | 1.1 | 0.9 | 1.1 | 1.3 | 1.2 | IPF13815     | 6398814..6 unknown function                     | orf19.4553 | 13815 | IPF13815     | No significant S.c. match                                                                 |                                                                                    |
| CA1528 | 1.1 | 1.2 | 1.1 | 1.0 | 0.9 | 0.9 | ALS4.3F      | 6408890..6 agglutinin-like protein, 3-prime en  | orf19.4556 | 13009 | CaALS4.3F    | C-compound and carbohydrate metabolism                                                    | SUBCELLULAR LOCALISATION Other virulence attributes                                |
| CA1529 | 0.9 | 1.0 | 1.0 | 1.0 | 0.9 | 1.0 | SPC105       | 6411436..6 Spindle pole body protein (by hom    | orf19.4557 | 15446 | CaSPC105     | SUBCELLULAR LOCALISATION                                                                  | structural molecule activity                                                       |
| CA1530 | 1.0 | 1.0 | 0.9 | 0.9 | 1.0 | 1.0 | ALG2.5       | 6418468..6 mannosyltransferase, 5-prime end     | orf19.1221 | 9503  | CaALG2.5     | C-compound and carbohydrate metabolism                                                    | ""PROTEIN FATE [folding modification destination] transferase activity             |
| CA1531 | 1.0 | 0.9 | 1.0 | 0.9 | 1.0 | 1.0 | RVS167       | complemer (putative) cytoskeletal protein (by l | orf19.1220 | 9505  | CaRVS167     | CELL FATE SUBCELLULAR LOCALISATION                                                        | protein binding                                                                    |
| CA1532 | 1.0 | 0.9 | 1.0 | 1.0 | 1.1 | 1.0 | IPF9507      | 6421659..6 unknown function                     | orf19.8806 | 9507  | IPF9507      | UNCLASSIFIED PROTEINS                                                                     | molecular_function unknown                                                         |
| CA1533 | 1.0 | 1.0 | 0.9 | 1.0 | 1.0 | 1.0 | IPF9510      | complemer unknown function                      | orf19.8803 | 9510  | IPF9510      | No significant S.c. match                                                                 |                                                                                    |
| CA1534 | 1.0 | 1.0 | 1.1 | 1.0 | 1.0 | 1.1 | MAP2         | 6428609..6 methionine aminopeptidase (by ho     | orf19.1214 | 9511  | CaMAP2       | PROTEIN SYNTHESIS ""PROTEIN FATE [folding modification destination] peptidase activity    |                                                                                    |
| CA1535 | 1.1 | 1.0 | 1.0 | 1.0 | 1.0 | 1.0 | IPF9515      | 6432481..6 similar to Saccharomyces cerevisi    | orf19.8800 | 9515  | IPF9515      | C-compound and carbohydrate metabolism                                                    | TRANSCRIPTION SUBCELLULAR LOCALISATION protein binding                             |
| CA1536 | 1.1 | 1.0 | 1.0 | 1.0 | 1.0 | 1.1 | SOK1         | 6443209..6 high copy suppressor of a cyclic     | orf19.451  | 13595 | CaSOK1       | TRANSCRIPTION SUBCELLULAR LOCALISATION                                                    | molecular_function unknown                                                         |
| CA1537 | 1.0 | 0.9 | 1.2 | 1.0 | 1.0 | 1.1 | IPF17483     | complemer unknown function                      | orf19.450  | 17483 | IPF17483     | No significant S.c. match                                                                 |                                                                                    |
| CA1538 | 0.8 | 1.0 | 1.0 | 1.0 | 1.0 | 1.0 | ID11.3EOC    | complemer Isopentenyl-diphosphate delta-isor    | orf19.4558 | 1053  | CaID11.3EOC  | Lipid fatty-acid and isoprenoid metabolism                                                | ""SUBCELLULAR LOCALISATION                                                         |
| CA1539 | 1.0 | 0.6 | 0.9 | 1.1 | 1.0 | 1.1 | BFR1         | 6456504..6 Similar to Saccharomyces cerevisi    | orf19.4560 | 1051  | CaBFR1       | CELL CYCLE AND DNA PROCESSING CELL FATE                                                   | RNA binding                                                                        |
| CA1540 | 1.1 | 1.0 | 1.0 | 1.0 | 1.0 | 1.0 | IPF1047      | 6458249..6 unknown function                     | orf19.4563 | 1047  | IPF1047      | UNCLASSIFIED PROTEINS                                                                     | molecular_function unknown                                                         |
| CA1541 | 1.1 | 1.1 | 1.0 | 1.1 | 0.9 | 1.0 | BGL21        | 6460091..6 endo-beta-1,3-glucanase (by hom      | orf19.4565 | 1046  | CaBGL21      | C-compound and carbohydrate metabolism                                                    | SUBCELLULAR LOCALISATION hydrolase activity                                        |
| CA1542 | 0.9 | 0.9 | 1.1 | 1.0 | 1.0 | 1.1 | ROT11        | 6461381..6 Putative membrane protein            | orf19.4566 | 1044  | CaROT11      | CELL CYCLE AND DNA PROCESSING                                                             |                                                                                    |
| CA1543 | 1.1 | 1.0 | 0.9 | 1.1 | 1.0 | 1.0 | IPF1043      | 6462725..6 Similar to hydroxyquinol 1,2-diox    | orf19.4567 | 1043  | IPF1043      | No significant S.c. match                                                                 |                                                                                    |
| CA1544 | 1.0 | 1.0 | 1.0 | 1.0 | 1.0 | 1.0 | IPF1040      | 6464496..6 Similar to transcriptional activator | orf19.4568 | 1040  | IPF1040      | C-compound and carbohydrate metabolism                                                    | TRANSCRIPTION SUBCELLULAR LOCALISATION                                             |
| CA1545 | 1.0 | 0.9 | 1.1 | 1.0 | 1.0 | 1.1 | CDR3.5EOC    | complemer ABC transporter, multidrug resista    | orf19.1313 | 14709 | CaCDR3.5EOC  | Lipid fatty-acid and isoprenoid metabolism                                                | ""CELL RESCUE DEFENSE AND VIRULENCE ""REGULATION OF/INTEIN                         |
| CA1546 | 1.1 | 1.0 | 1.1 | 1.1 | 1.1 | 1.1 | IPF6671      | 6475739..6 unknown function                     | orf19.8891 | 6671  | IPF6671      | UNCLASSIFIED PROTEINS                                                                     | molecular_function unknown                                                         |
| CA1547 |     |     |     |     |     |     | IPF6672      | complement(6478315..6480216)                    |            |       |              |                                                                                           |                                                                                    |
| CA1548 | 0.9 | 0.9 | 1.1 | 1.0 | 1.1 | 1.3 | IPF8746      | 6485521..6 putative alpha-1,3-mannosyltransf    | orf19.4279 | 8746  | IPF8746      | C-compound and carbohydrate metabolism                                                    | ""PROTEIN FATE [folding modification destination] ""SUBCELLULAR LOCALISATION       |
| CA1549 | 1.0 | 0.9 | 0.9 | 0.9 | 1.0 | 1.0 | IPF8744      | 6488638..6 unknown function                     | orf19.4278 | 8744  | IPF8744      | TRANSCRIPTION SUBCELLULAR LOCALISATION                                                    | molecular_function unknown                                                         |
| CA1550 | 1.0 | 1.0 | 1.0 | 1.0 | 1.0 | 1.0 | IPF8741.5F   | 6491170..6 unknown function, 5-prime end        | orf19.4276 | 8742  | IPF8741.5F   | No significant S.c. match                                                                 |                                                                                    |
| CA1551 | 1.0 | 0.9 | 1.0 | 1.0 | 1.0 | 1.0 | IPF8741.3F   | 6492327..6 unknown function, 3-prime end        | orf19.4275 | 8741  | IPF8741.3F   | CELL CYCLE AND DNA PROCESSING TRANSCRIPTION SUBCELLULAR LOCALISATION                      | protein binding                                                                    |
| CA1552 | 0.9 | 1.0 | 0.9 | 0.9 | 0.9 | 0.9 | PUT1         | complemer proline oxidase (by homology)         | orf19.4274 | 8739  | CaPUT1       | Amino acid metabolism SUBCELLULAR LOCALISATION                                            | oxidoreductase activity                                                            |
| CA1553 | 0.9 | 1.0 | 1.0 | 1.0 | 1.0 | 1.0 | IPF14081     | complemer unknown function                      | orf19.1714 | 14081 | IPF14081     | No significant S.c. match                                                                 |                                                                                    |
| CA1554 | 1.0 | 1.0 | 0.9 | 1.0 | 1.0 | 1.0 | GEA2.3F      | complemer GTP/GDP exchange factor, 3-prim       | orf19.1713 | 14077 | CaGEA2.3F    | CELLULAR TRANSPORT AND TRANSPORT MECHANISMS SUBCELLULAR LOCALISATION                      | enzyme regulator activity                                                          |
| CA1556 | 1.1 | 1.0 | 1.1 | 1.1 | 1.0 | 1.0 | END3         | 6505531..6 required for endocytosis and cytos   | orf19.1711 | 15676 | CaEND3       | CELLULAR TRANSPORT AND TRANSPORT MECHANISMS CELL FATE                                     | protein binding                                                                    |
| CA1557 | 1.0 | 0.9 | 1.1 | 0.9 | 0.8 | 1.1 | IPF15677     | complemer probable NADH-ubiquinone oxidor       | orf19.1710 | 15677 | IPF15677     | No significant S.c. match                                                                 |                                                                                    |
| CA1558 | 1.2 | 1.1 | 1.0 | 1.1 | 1.0 | 1.0 | IPF15679     | complemer lipid transfer protein (by homology)  | orf19.1709 | 15679 | IPF15679     | No significant S.c. match                                                                 |                                                                                    |
| CA1559 | 1.0 | 1.0 | 0.9 | 1.0 | 1.0 | 1.1 | IPF16533     | 6510839..6 unknown function                     | orf19.1708 | 16533 | IPF16533     | No significant S.c. match                                                                 |                                                                                    |
| CA1560 | 1.0 | 0.9 | 1.1 | 0.9 | 0.9 | 0.9 | MET18        | complemer Involved in NER repair and RNA p      | orf19.1706 | 16088 | CaMET18      | CELL CYCLE AND DNA PROCESSING TRANSCRIPTION SUBCELLULAR LOCALISATION                      | transcription regulator activity                                                   |
| CA1561 | 1.0 | 1.1 | 1.1 | 1.0 | 1.1 | 0.9 | POT12        | complemer peroxysomal 3-ketoacyl-CoA thiol      | orf19.1704 | 16087 | CaPOT12      | Lipid fatty-acid and isoprenoid metabolism                                                | ""ENERGY SUBCELLULAR LOCALISATION                                                  |
| CA1563 | 1.0 | 1.1 | 1.1 | 1.0 | 1.0 | 1.0 | IPF13855     | 6535766..6 unknown function                     | orf19.4713 | 13855 | IPF13855     | No significant S.c. match                                                                 |                                                                                    |
| CA1564 | 1.1 | 1.0 | 1.5 | 1.6 | 1.2 | 1.6 | GAD1         | complemer Glutamate decarboxylase (by hom       | orf19.1153 | 7609  | CaGAD1       | Amino acid metabolism                                                                     | lyase activity                                                                     |
| CA1565 | 1.0 | 1.0 | 0.9 | 0.9 | 1.0 | 1.0 | EGD1         | complemer GAL4 DNA-binding enhancer prote       | orf19.1154 | 7610  | CaEGD1       | C-compound and carbohydrate metabolism                                                    | TRANSCRIPTION ""PROTEIN FATE [folding modification destination] chaperone activity |
| CA1566 | 0.9 | 1.0 | 0.9 | 1.0 | 1.0 | 1.1 | DPP2         | 6543266..6 Diacylglycerol pyrophosphate pho     | orf19.1155 | 7611  | CaDPP2       | Lipid fatty-acid and isoprenoid metabolism                                                | ""CELL CYCLE AND DNA PROCESSING CELL FATE                                          |
| CA1567 | 1.0 | 1.0 | 0.9 | 0.9 | 1.0 | 0.9 | IPF7613      | 6544566..6 unknown function                     | orf19.1156 | 7613  | IPF7613      | CELL RESCUE DEFENSE AND VIRULENCE                                                         | ""SUBCELLULAR LOCALISATION                                                         |
| CA1568 | 1.0 | 1.0 | 1.1 | 1.1 | 1.0 | 1.0 | IPF7615      | complemer unknown function                      | orf19.1158 | 7615  | IPF7615      | UNCLASSIFIED PROTEINS                                                                     |                                                                                    |
| CA1569 | 1.1 | 1.1 | 1.0 | 1.0 | 1.0 | 1.1 | IPF7616      | 6546850..6 putative homoserine O-acetyltrans    | orf19.1159 | 7616  | IPF7616      | Amino acid metabolism SUBCELLULAR LOCALISATION                                            |                                                                                    |
| CA1570 | 1.1 | 1.0 | 0.9 | 1.0 | 1.1 | 1.0 | IPF7617      | complemer unknown function                      | orf19.1160 | 7617  | IPF7617      | UNCLASSIFIED PROTEINS                                                                     | molecular_function unknown                                                         |
| CA1571 | 1.1 | 1.0 | 1.0 | 1.0 | 0.9 | 1.1 | SPO14.3EOC   | complemer phospholipase D, 3-prime end          |            | 7619  | CaSPO14.3EOC | Lipid fatty-acid and isoprenoid metabolism                                                | ""CELL CYCLE AND DNA PROCESSING CELL FATE                                          |
| CA1572 | 1.2 | 1.7 | 1.0 | 0.9 | 1.0 | 1.0 | POX4         | 6553045..6 peroxisomal fatty acyl-CoA oxidas    | orf19.9221 | 15088 | CaPOX4       | Lipid fatty-acid and isoprenoid metabolism                                                | ""ENERGY SUBCELLULAR LOCALISATION oxidoreductase activity                          |
| CA1573 | 1.0 | 1.0 | 1.0 | 1.0 | 1.0 | 1.0 | IPF15087     | 6555631..6 unknown function                     | orf19.1653 | 15087 | IPF15087     | UNCLASSIFIED PROTEINS                                                                     |                                                                                    |
| CA1574 | 1.1 | 1.2 | 1.0 | 1.0 | 1.1 | 0.9 | PXP2         | complemer acyl-CoA oxidase peroxisomal (by      | orf19.1655 | 13474 | CaPXP2       | Lipid fatty-acid and isoprenoid metabolism                                                | ""ENERGY SUBCELLULAR LOCALISATION                                                  |
| CA1576 | 0.9 | 1.0 | 1.5 | 1.5 | 1.3 | 1.1 | HYR1         | 6570537..6 hyphally regulated prot hyphally re  | orf19.1244 | 19734 | CaHYR1       | Hypha-specific No significant S.c. match                                                  |                                                                                    |

|        |     |     |     |     |     |     |              |                                                             |                  |                                                                                |                                     |
|--------|-----|-----|-----|-----|-----|-----|--------------|-------------------------------------------------------------|------------------|--------------------------------------------------------------------------------|-------------------------------------|
| CA1577 | 1.0 | 1.1 | 1.0 | 1.0 | 1.0 | 1.0 | KNS1         | 6578007..6Ser/thr protein kinase (by homologorf19.12441     | 11410 CaKNS1     | CLASSIFICATION NOT YET CLEAR-CUT                                               | protein kinase activity             |
| CA1578 | 1.0 | 1.0 | 0.9 | 1.1 | 1.0 | 1.0 | NUM11        | complemer nuclear migration protein (by homcorf19.4715      | 8243 CaNUM11     | CELL CYCLE AND DNA PROCESSING                                                  | protein binding                     |
| CA1579 | 1.2 | 1.1 | 1.0 | 1.0 | 1.1 | 1.1 | GDH3         | complemer NADP-glutamate dehydrogenase (orf19.4716          | 8236 CaGDH3      | Amino acid metabolism Nitrogen and sulphur metabolism SUBCELLULAR LOCALISATION | oxidoreductase activity             |
| CA1580 | 1.0 | 1.1 | 1.0 | 1.1 | 1.0 | 1.1 | TRP5         | 6591781..6tryptophan synthase (by homologorf19.4718         | 8232 CaTRP5      | Amino acid metabolism SUBCELLULAR LOCALISATION                                 | lyase activity                      |
| CA1581 | 1.1 | 1.1 | 1.1 | 1.1 | 1.1 | 1.0 | CWH41.3EOC   | complemer ER glucosidase I, 3-prime end (byorf19.4719       | 8229 CaCWH41     | C-compound and carbohydrate metabolism CONTROL OF CELLULAR C                   | hydrolase activity                  |
| CA1582 | 0.9 | 0.8 | 1.0 | 1.0 | 1.0 | 1.0 | CLN21        | 6600806..6G1 cyclin (by homology)                           | 15332 CaCLN21    | CELL CYCLE AND DNA PROCESSING SUBCELLULAR LOCALISATION                         | protein kinase activity,enzyme regi |
| CA1583 | 1.0 | 1.0 | 1.0 | 1.0 | 1.0 | 1.0 | ROT1         | 6605304..6Suppressor of TOR2 mutations (byorf19.6029        | 18655 CaROT1     | CELL CYCLE AND DNA PROCESSING                                                  | molecular_function unknown          |
| CA1584 | 1.1 | 1.1 | 1.0 | 1.0 | 1.0 | 0.9 | IPF15824     | complemer unknown function                                  | 15824 IPF15824   | No significant S.c. match                                                      |                                     |
| CA1585 | 1.1 | 1.1 | 1.0 | 1.1 | 1.2 | 1.0 | VPS27        | 6607805..6Vacuolar protein sorting (by homologorf19.6031    | 15825 CaVPS27    | PROTEIN FATE [folding modification destination] ""CELLULAR TRANSP              | protein binding                     |
| CA1586 | 1.0 | 1.0 | 1.0 | 1.0 | 1.0 | 1.0 | ODC1         | 6611062..6Ornithine decarboxylase                           | 1466 CaODC1      | Secondary metabolism CONTROL OF CELLULAR ORGANIZATION                          | lyase activity                      |
| CA1587 | 1.0 | 1.1 | 1.1 | 1.0 | 1.0 | 1.1 | CMP2         | 6613123..6Calcineurin B, catalytic subunit (byorf19.6033    | 1465 CaCMP2      | TRANSCRIPTION CELL FATE SUBCELLULAR LOCALISATION                               | protein phosphatase activity        |
| CA1588 | 1.0 | 1.1 | 1.0 | 1.0 | 1.0 | 1.0 | SPT8         | 6619516..6transcriptional adaptor or co-activeorf19.1178    | 16990 CaSPT8     | TRANSCRIPTION SUBCELLULAR LOCALISATION                                         | transcription regulator activity    |
| CA1589 | 1.0 | 1.0 | 1.0 | 0.9 | 1.0 | 1.1 | IPF16988     | complemer unknown function                                  | 16988 IPF16988   | No significant S.c. match                                                      |                                     |
| CA1590 | 1.0 | 1.1 | 0.9 | 1.0 | 1.0 | 0.9 | IPF14665     | complemer unknown function                                  | 14665 IPF14665   | UNCLASSIFIED PROTEINS                                                          | enzyme regulator activity           |
| CA1591 | 1.0 | 1.0 | 1.0 | 1.0 | 1.0 | 1.0 | IPF14663     | 6625398..6unknown function                                  | 14663 IPF14663   | UNCLASSIFIED PROTEINS                                                          |                                     |
| CA1592 | 1.1 | 1.0 | 1.0 | 0.9 | 1.1 | 1.1 | IPF14662     | complemer D-xylose reductase (by homology)orf19.4317        | 14662 IPF14662   | C-compound and carbohydrate metabolism ""CELL RESCUE DEFENSE                   | oxidoreductase activity             |
| CA1593 | 1.0 | 1.0 | 1.0 | 1.1 | 1.1 | 1.0 | MIG1         | complemer transcriptional regulator                         | 11048 CaMIG1     | C-compound and carbohydrate metabolism TRANSCRIPTION SUBCELL                   | transcription regulator activity    |
| CA1594 | 1.0 | 1.0 | 1.0 | 1.0 | 1.0 | 1.0 | IPF11051     | complemer unknown function                                  | 11051 IPF11051   | No significant S.c. match                                                      |                                     |
| CA1595 | 1.0 | 1.0 | 0.9 | 1.1 | 1.1 | 1.0 | IPF9544      | 6636402..6unknown function                                  | 9544 IPF9544     | UNCLASSIFIED PROTEINS                                                          | molecular_function unknown          |
| CA1596 | 1.1 | 1.1 | 1.0 | 1.0 | 0.9 | 1.0 | FAA21        | 6640140..6long-chain-fatty-acid-CoA ligase (torf19.272      | 9539 CaFAA21     | Lipid fatty-acid and isoprenoid metabolism ""CELLULAR TRANSPORT A              | ligase activity                     |
| CA1597 | 0.9 | 0.9 | 1.0 | 1.1 | 1.0 | 1.1 | IPF9538      | complemer unknown function                                  | 9538 IPF9538     | ENERGY SUBCELLULAR LOCALISATION                                                |                                     |
| CA1598 | 1.0 | 1.0 | 1.0 | 1.0 | 1.0 | 1.0 | SES1         | complemer seryl-tRNA synthetase seryl-tRNA orf19.7901       | 9534 CaSES1      | No significant S.c. match                                                      | ligase activity                     |
| CA1599 | 0.9 | 1.0 | 1.0 | 1.0 | 1.0 | 0.9 | IPF11452     | 6646907..6unknown function                                  | 11452 IPF11452   | CELL CYCLE AND DNA PROCESSING                                                  | molecular_function unknown          |
| CA1600 | 0.9 | 1.0 | 1.1 | 1.1 | 0.9 | 0.9 | CTR2         | 6650213..6copper transport protein (by homo orf19.4720      | 15729 CaCTR2     | CELLULAR TRANSPORT AND TRANSPORT MECHANISMS REGULA                             | transporter activity                |
| CA1601 | 0.9 | 1.0 | 1.0 | 1.0 | 1.0 | 1.0 | IPF15728     | 6651071..6unknown function                                  | 15728 IPF15728   | No significant S.c. match                                                      |                                     |
| CA1602 | 1.0 | 0.9 | 1.0 | 1.0 | 1.1 | 1.1 | RTG1         | 6652812..6basic helix-loop-helix transcription orf19.4722   | 13658 CaRTG1     | C-compound and carbohydrate metabolism TRANSCRIPTION SUBCELL                   | transcription regulator activity    |
| CA1603 | 1.0 | 1.0 | 1.0 | 1.0 | 0.9 | 1.0 | FAD1         | complemer flavin adenine dinucleotide (FAD) orf19.4723      | 13656 CaFAD1     | Metabolism of vitamins cofactors and prosthetic groups ""SUBCELLULAR           | nucleotidyltransferase activity     |
| CA1604 | 1.0 | 1.0 | 1.1 | 1.0 | 1.0 | 1.0 | IPF13653     | complemer unknown function                                  | 13653 IPF13653   | TRANSCRIPTION SUBCELLULAR LOCALISATION                                         | RNA binding                         |
| CA1605 | 1.0 | 1.0 | 1.0 | 0.9 | 1.0 | 1.0 | SWI6         | 6656250..6Transcription factor (by homology)orf19.4725      | 17885 CaSWI6     | CELL CYCLE AND DNA PROCESSING TRANSCRIPTION CONTROL C                          | protein binding                     |
| CA1606 | 0.9 | 0.9 | 1.0 | 1.1 | 1.1 | 1.0 | NCS1         | complemer Calcium binding protein (by homolog orf19.4726    | 16484 CaNCS1     | CELLULAR COMMUNICATION/SIGNAL TRANSDUCTION MECHANISM                           |                                     |
| CA1607 | 1.0 | 1.0 | 1.0 | 1.0 | 0.9 | 1.0 | IPF14916     | 6659506..6unknown function                                  | 16483 IPF14916   | UNCLASSIFIED PROTEINS                                                          | molecular_function unknown          |
| CA1608 | 1.0 | 1.1 | 1.0 | 1.0 | 1.0 | 0.9 | TES12        | complemer Thiosterase (by homology)                         | 5877 CaTES12     | Lipid fatty-acid and isoprenoid metabolism ""SUBCELLULAR LOCALISA              | hydrolase activity                  |
| CA1609 | 1.1 | 1.0 | 1.0 | 0.9 | 0.9 | 0.9 | TES11        | complemer Thiosterase (by homology)                         | 5879 CaTES11     | Lipid fatty-acid and isoprenoid metabolism ""SUBCELLULAR LOCALISATION          |                                     |
| CA1610 | 0.9 | 1.0 | 0.9 | 1.0 | 1.0 | 1.0 | LAS1         | 6667577..6cell morphogenesis, cytoskeletal rorf19.4120      | 5882 CaLAS1      | CELL CYCLE AND DNA PROCESSING CELL FATE SUBCELLULAR LC                         | molecular_function unknown          |
| CA1611 | 0.9 | 0.9 | 1.0 | 1.1 | 1.1 | 1.0 | SPO72        | 6669692..6required for sporulation (by homologorf19.4119    | 12198 CaSPO72    | CELL CYCLE AND DNA PROCESSING CELL FATE                                        | molecular_function unknown          |
| CA1612 | 1.0 | 1.0 | 1.0 | 1.0 | 1.0 | 1.0 | IFJ6         | complemer unknown function                                  | 12814 CaIFJ6     | No significant S.c. match                                                      |                                     |
| CA1613 | 1.0 | 0.9 | 1.0 | 1.0 | 1.0 | 0.9 | IPF19735     | complemer unknown function                                  | 19735 IPF19735   | UNCLASSIFIED PROTEINS                                                          |                                     |
| CA1614 | 0.9 | 1.0 | 1.0 | 1.1 | 1.0 | 0.9 | IPF18645     | complemer unknown function                                  | 18645 IPF18645   | UNCLASSIFIED PROTEINS                                                          |                                     |
| CA1615 | 1.0 | 1.0 | 0.9 | 1.1 | 1.0 | 0.9 | IPF14540     | 6689569..6putative multidrug protein (by homologorf19.3218  | 14540 IPF14540   | TRANSPORT FACILITATION                                                         | molecular_function unknown          |
| CA1616 | 1.0 | 1.0 | 1.0 | 0.9 | 0.9 | 1.1 | IPF14538     | 6693378..6unknown function                                  | 14538 IPF14538   | UNCLASSIFIED PROTEINS                                                          |                                     |
| CA1617 | 1.0 | 1.0 | 0.9 | 1.1 | 1.0 | 1.0 | IPF14536     | 6695614..6unknown function                                  | 14536 IPF14536   | UNCLASSIFIED PROTEINS                                                          | molecular_function unknown          |
| CA1618 | 1.0 | 1.0 | 1.0 | 0.9 | 1.0 | 1.1 | RRP45        | complemer Protein component of the exosomeorf19.1155        | 2068 CaRRP45     | TRANSCRIPTION                                                                  | RNA binding                         |
| CA1619 | 1.1 | 1.0 | 1.0 | 1.0 | 1.1 | 1.0 | IPF2067      | complemer Required for mannosylation of sphorf19.1155       | 2067 IPF2067     | Lipid fatty-acid and isoprenoid metabolism ""CELL FATE                         | transferase activity                |
| CA1620 | 0.9 | 1.0 | 1.0 | 1.1 | 1.0 | 0.8 | MET10        | 6704455..6Sulfite reductase flavin-binding sutorf19.4076    | 13194 CaMET10    | Amino acid metabolism Nitrogen and sulphur metabolism                          | transporter activity                |
| CA1621 | 1.0 | 1.0 | 1.0 | 0.9 | 0.9 | 1.0 | IFF6         | 6711242..6unknown function                                  | 19647 CaIFF6     | No significant S.c. match                                                      |                                     |
| CA1622 | 0.9 | 1.0 | 1.1 | 1.0 | 1.0 | 1.0 | IPF10045     | 6715191..6similar to Saccharomyces cerevisiorf19.470        | 10045 IPF10045   | TRANSCRIPTION                                                                  | transcription regulator activity    |
| CA1623 | 1.0 | 1.1 | 1.0 | 1.1 | 1.0 | 1.0 | STE7         | complemer MAP Kinase Kinase                                 | 10048 CaSTE7     | REGULATION OF/INTERACTION WITH CELLULAR ENVIRONMENT C                          | protein kinase activity             |
| CA1624 | 1.0 | 0.8 | 1.1 | 1.3 | 1.1 | 1.1 | IPF10055     | complemer unknown function                                  | 10055 IPF10055   | No significant S.c. match                                                      |                                     |
| CA1625 | 1.3 | 1.1 | 1.0 | 1.1 | 1.2 | 1.1 | IPF6156      | 6732538..6similar to C.elegans LIM homeoborf19.1034         | 6156 IPF6156     | UNCLASSIFIED PROTEINS                                                          |                                     |
| CA1626 | 1.0 | 1.0 | 1.0 | 1.0 | 1.0 | 1.0 | STR2         | complemer O-succinylhomoserine (thiol)-lyaseorf19.1033      | 6155 CaSTR2      | Amino acid metabolism                                                          | transferase activity                |
| CA1627 | 1.1 | 1.2 | 1.0 | 1.1 | 1.2 | 1.1 | SKO1.3       | 6736495..6Cre-binding bzp protein, 3-prime orf19.1032       | 6153 CaSKO1.3    | TRANSCRIPTION SUBCELLULAR LOCALISATION                                         | transcription regulator activity    |
| CA1628 | 0.9 | 1.0 | 1.0 | 1.1 | 1.0 | 1.0 | HMG1         | complemer 3-hydroxy-3-methylglutaryl-coenzorf19.1031        | 19736 CaHMG1     | Lipid fatty-acid and isoprenoid metabolism ""SUBCELLULAR LOCALISA              | oxidoreductase activity             |
| CA1629 | 1.0 | 1.0 | 0.9 | 1.0 | 1.1 | 1.0 | NPI46        | complemer proline cis-trans isomerase (by homologorf19.1030 | 14314 CaNPI46    | PROTEIN FATE [folding modification destination]                                | isomerase activity                  |
| CA1630 | 0.9 | 0.9 | 1.0 | 1.0 | 1.0 | 1.0 | RPP1         | 6745236..6required for processing of tRNA arorf19.1029      | 14315 CaRPP1     | TRANSCRIPTION SUBCELLULAR LOCALISATION                                         | RNA binding                         |
| CA1631 | 1.0 | 1.1 | 0.9 | 1.0 | 1.0 | 1.0 | IPF19582     | complemer unknown function                                  | 19582 IPF19582   | UNCLASSIFIED PROTEINS                                                          | transcription regulator activity    |
| CA1632 | 1.1 | 1.1 | 1.0 | 0.9 | 1.0 | 0.9 | IPF10181     | 6750184..6similar to Saccharomyces cerevisiorf19.1142       | 10823 IPF10181   | UNCLASSIFIED PROTEINS                                                          | structural molecule activity        |
| CA1633 | 0.9 | 1.0 | 1.0 | 1.1 | 0.9 | 1.0 | IPF10180     | complemer unknown function                                  | 10822 IPF10180   | No significant S.c. match                                                      |                                     |
| CA1634 | 1.1 | 1.1 | 1.0 | 1.0 | 1.0 | 0.9 | IPF10179     | 6752178..6unknown function                                  | 10820 IPF10179   | UNCLASSIFIED PROTEINS                                                          | molecular_function unknown          |
| CA1635 | 1.0 | 1.0 | 0.9 | 1.0 | 1.1 | 1.0 | URA7         | complemer CTP synthase 1 (by homology)                      | 10815 CaURA7     | Nucleotide metabolism CONTROL OF CELLULAR ORGANIZATION                         | ligase activity                     |
| CA1636 | 0.9 | 0.9 | 1.0 | 1.0 | 1.0 | 1.0 | IPF20086     | complemer unknown function                                  | 20086 IPF20086   | UNCLASSIFIED PROTEINS                                                          | molecular_function unknown          |
| CA1637 | 0.9 | 0.9 | 0.7 | 0.7 | 0.9 | 1.1 | RPL43A.3     | complemer ribosomal protein, 3-prime end (by homology,      | 20087 CaRPL43A   | PROTEIN SYNTHESIS SUBCELLULAR LOCALISATION                                     | structural molecule activity        |
| CA1638 | 1.0 | 1.0 | 1.1 | 1.0 | 1.1 | 0.9 | GRR1         | complemer Required for glucose repression aorf19.3944       | 14608 CaGRR1     | C-compound and carbohydrate metabolism CELL CYCLE AND DNA PR                   | protein binding                     |
| CA1639 | 0.9 | 1.0 | 1.0 | 1.0 | 1.0 | 0.9 | IPF18641.EXC | 6763994..6unknown function, exon 1                          | 18641 IPF18641.ε | UNCLASSIFIED PROTEINS                                                          |                                     |
| CA1640 | 0.9 | 0.9 | 1.1 | 1.2 | 0.9 | 1.0 | IPF18641.EXC | 6765639..6unknown function, exon 2                          | 18640 IPF18641.ε | UNCLASSIFIED PROTEINS                                                          |                                     |
| CA1641 | 0.9 | 1.0 | 1.0 | 1.0 | 0.9 | 1.1 | NHP10.3F     | complemer unknown function, 3-prime end                     | 9350 CaNHP10.3   | CLASSIFICATION NOT YET CLEAR-CUT                                               | molecular_function unknown          |
| CA1642 | 0.9 | 0.9 | 1.0 | 1.0 | 1.1 | 1.1 | NHP1.5F      | complemer unknown function, 5-prime end                     | 9349 CaNHP1.5    | CLASSIFICATION NOT YET CLEAR-CUT                                               |                                     |
| CA1643 | 0.9 | 1.0 | 1.0 | 0.9 | 0.9 | 0.9 | IPF9347      | 6769829..6unknown function                                  | 9347 IPF9347     | No significant S.c. match                                                      |                                     |
| CA1644 | 0.9 | 0.9 | 1.0 | 1.1 | 0.9 | 1.0 | IPF9345      | complemer unknown function                                  | 9345 IPF9345     | No significant S.c. match                                                      |                                     |
| CA1645 | 1.1 | 1.2 | 1.0 | 1.0 | 1.0 | 1.0 | PMC1         | 6774913..6Ca2+-transporting P-type ATPase                   | 9340 CaPMC1      | CELLULAR TRANSPORT AND TRANSPORT MECHANISMS REGULA                             | transporter activity                |
| CA1646 | 0.9 | 1.0 | 1.0 | 1.1 | 1.0 | 1.0 | IPF9336.3EOC | complemer unknown function, 3-prime end                     | 9336 IPF9336.3ε  | No significant S.c. match                                                      |                                     |
| CA1647 | 1.0 | 0.9 | 1.0 | 1.1 | 1.0 | 1.0 | IPF16663     | 6783732..6unknown function                                  | 16663 IPF16663   | UNCLASSIFIED PROTEINS                                                          | protein binding                     |
| CA1648 | 1.1 | 1.0 | 1.0 | 1.0 | 1.0 | 1.0 | IPF16662     | complemer unknown function                                  | 16662 IPF16662   | TRANSCRIPTION SUBCELLULAR LOCALISATION                                         | RNA binding                         |

|        |     |     |     |     |     |     |             |                                                           |            |                  |                                                                                                                      |                                             |
|--------|-----|-----|-----|-----|-----|-----|-------------|-----------------------------------------------------------|------------|------------------|----------------------------------------------------------------------------------------------------------------------|---------------------------------------------|
| CA1649 | 1.0 | 1.0 | 0.9 | 1.0 | 1.0 | 0.9 | LAB1        | 6785702.6Lipoate biosynthesis by homology                 | orf19.5566 | 5392 CaLAB1      | UNCLASSIFIED PROTEINS                                                                                                | molecular_function unknown                  |
| CA1650 | 0.9 | 1.0 | 1.0 | 1.0 | 0.9 | 0.9 | IPF5389     | 6788276.63-hydroxyisobutyrate dehydrogenase               | orf19.5565 | 5389 IPF5389     | No significant S.c. match                                                                                            |                                             |
| CA1651 | 1.0 | 0.9 | 1.0 | 1.0 | 1.0 | 0.9 | RNH1.EXON2  | complemer Ribonuclease H, exon 2 (by homo                 | orf19.5564 | 18639 CaRNH1.e   | Nucleotide metabolism CONTROL OF CELLULAR ORGANIZATION                                                               |                                             |
| CA1652 | 1.0 | 1.0 | 1.0 | 0.9 | 1.0 | 1.0 | RNH1.EXON1  | complemer Ribonuclease H, exon 1 (by homo                 | orf19.5563 | 5387 CaRNH1.e    | Nucleotide metabolism CONTROL OF CELLULAR ORGANIZATION                                                               | RNA binding                                 |
| CA1653 | 1.0 | 1.1 | 1.0 | 1.1 | 1.1 | 1.1 | STE23       | complemer protease involved in a-factor proce             | orf19.5561 | 5385 CaSTE23     | PROTEIN FATE [folding modification destination] ""CELL FATE                                                          | peptidase activity                          |
| CA1654 | 1.0 | 0.9 | 1.0 | 1.0 | 1.0 | 1.0 | IPF19660    | complemer unknown function                                | orf19.5559 | 19661 IPF19660   | UNCLASSIFIED PROTEINS                                                                                                | molecular_function unknown                  |
| CA1655 | 1.0 | 0.9 | 1.1 | 1.1 | 1.0 | 1.1 | CCO2        | complemer putative copper-transporting ATPa               | orf19.4328 | 12705 CaCCC2     | REGULATION OF/INTERACTION WITH CELLULAR ENVIRONMENT                                                                  | S transporter activity                      |
| CA1656 | 0.9 | 1.0 | 1.0 | 1.0 | 1.0 | 1.0 | IPF16019    | complemer unknown function                                | orf19.4326 | 16019 IPF16019   | TRANSCRIPTION                                                                                                        | RNA binding                                 |
| CA1657 | 1.1 | 1.0 | 1.1 | 1.0 | 1.1 | 0.9 | IPF16022    | 6810308.6 unknown function                                | orf19.4325 | 16022 IPF16022   | UNCLASSIFIED PROTEINS                                                                                                |                                             |
| CA1658 | 1.0 | 1.1 | 1.0 | 1.0 | 1.0 | 1.0 | IPF19924    | complemer unknown function                                | orf19.4324 | 19924 IPF19924   | No significant S.c. match                                                                                            |                                             |
| CA1659 | 1.1 | 1.1 | 1.0 | 0.9 | 0.9 | 1.0 | IPF11054    | 6814609.6 unknown function                                | orf19.4323 | 11054 IPF11054   | UNCLASSIFIED PROTEINS                                                                                                | molecular_function unknown                  |
| CA1660 | 1.0 | 1.0 | 1.0 | 1.0 | 1.0 | 1.0 | DAP2        | complemer dipeptidyl aminopeptidase B (by h               | orf19.4322 | 11053 CaDAP2     | PROTEIN FATE [folding modification destination] ""SUBCELLULAR LOCALISATION                                           | peptidase activity                          |
| CA1662 | 1.0 | 1.0 | 1.0 | 1.0 | 1.0 | 1.0 | RPL28.3F    | 6820892.6 Ribosomal protein, 3-prime end (by homology     |            | 7308 CaRPL28.3   | PROTEIN SYNTHESIS SUBCELLULAR LOCALISATION                                                                           | RNA binding                                 |
| CA1663 | 1.0 | 0.9 | 1.0 | 1.0 | 1.0 | 1.0 | IPF7309     | 6821859.6 unknown function                                | orf19.2864 | 7309 IPF7309     | UNCLASSIFIED PROTEINS                                                                                                | molecular_function unknown                  |
| CA1664 | 1.1 | 1.1 | 1.0 | 0.9 | 1.0 | 1.0 | ERV1.3      | 6823051.6 Mitochondrial biogenesis and regulation of cel  |            | 7312 CaERV1.3    | CELL CYCLE AND DNA PROCESSING SUBCELLULAR LOCALISATION                                                               | oxidoreductase activity                     |
| CA1665 | 1.1 | 1.0 | 1.1 | 1.0 | 1.0 | 0.9 | RIB1        | 6826003.6 GTP cyclohydrolase II by homolog                | orf19.2862 | 18635 CaRIB1     | Metabolism of vitamins cofactors and prosthetic groups                                                               | hydrolase activity                          |
| CA1666 | 1.0 | 1.0 | 1.1 | 1.1 | 1.0 | 1.1 | SRP40       | 6827174.6 rRNA I and II suppressor (by homol              | orf19.2859 | 19740 CaSRP40    | TRANSCRIPTION SUBCELLULAR LOCALISATION                                                                               | chaperone activity                          |
| CA1667 | 1.0 | 1.0 | 0.9 | 1.0 | 1.0 | 1.1 | SSL2        | 6828822.6 by homology to S. cerevisiae: DNA               | orf19.2857 | 11402 CaSSL2     | CELL CYCLE AND DNA PROCESSING TRANSCRIPTION SUBCELLULAR LOCALISATION                                                 | DNA binding, helicase activity              |
| CA1668 | 1.0 | 0.9 | 1.0 | 1.1 | 1.1 | 1.1 | IPF11396    | complemer unknown function                                | orf19.2853 | 11396 IPF11396   | UNCLASSIFIED PROTEINS                                                                                                |                                             |
| CA1669 | 1.0 | 1.0 | 1.1 | 1.0 | 0.9 | 1.1 | IPF11393    | 6832844.6 unknown function                                | orf19.2852 | 11393 IPF11393   | PROTEIN SYNTHESIS SUBCELLULAR LOCALISATION                                                                           | structural molecule activity                |
| CA1670 | 0.9 | 1.0 | 1.0 | 1.0 | 1.1 | 1.0 | IPF11392    | 6834063.6 unknown function                                | orf19.2851 | 11392 IPF11392   | Amino acid metabolism CELLULAR TRANSPORT AND TRANSPORT MECHANISMS SUBCELLULAR LOCALISATION                           |                                             |
| CA1671 | 1.0 | 1.0 | 1.0 | 1.1 | 0.9 | 1.0 | IPF11391    | complemer unknown function                                |            | 11391 IPF11391   | No significant S.c. match                                                                                            |                                             |
| CA1672 | 0.9 | 1.0 | 0.9 | 1.0 | 1.0 | 1.1 | IPF5196     | complemer unknown function                                | orf19.1109 | 5196 IPF5196     | No significant S.c. match                                                                                            |                                             |
| CA1673 | 1.0 | 1.0 | 1.1 | 1.3 | 1.1 | 1.1 | PST2        | 6840216.6 1,4-benzoquinone reductase by h                 | orf19.3612 | 5195 CaPST2      | UNCLASSIFIED PROTEINS                                                                                                | molecular_function unknown                  |
| CA1674 | 0.9 | 0.9 | 1.1 | 1.1 | 1.0 | 1.1 | PAF1        | 6841165.6 DNA-directed RNA polymerase II                  | orf19.3613 | 5194 CaPAF1      | TRANSCRIPTION SUBCELLULAR LOCALISATION                                                                               | transcription regulator activity            |
| CA1675 | 1.1 | 1.0 | 1.0 | 1.0 | 1.0 | 0.9 | IPF5192     | complemer unknown function                                | orf19.3615 | 5192 IPF5192     | UNCLASSIFIED PROTEINS                                                                                                | molecular_function unknown                  |
| CA1676 | 1.0 | 1.0 | 1.0 | 1.2 | 1.0 | 1.0 | ERG9        | complemer farnesyl-diphosphate f:squalene s               | orf19.3616 | 5191 CaERG9      | Lipid fatty-acid and isoprenoid metabolism ""SUBCELLULAR LOCALISATION                                                | transferase activity                        |
| CA1677 | 1.0 | 1.1 | 1.0 | 1.0 | 1.0 | 1.0 | GTR1        | complemer GTP-binding protein by homology                 | orf19.3617 | 5189 CaGTR1      | Phosphate metabolism                                                                                                 | hydrolase activity                          |
| CA1678 | 1.0 | 0.9 | 0.9 | 1.1 | 1.0 | 1.1 | IPF5185     | complemer putative cell wall protein (by homo             | orf19.3618 | 5185 IPF5185     | SUBCELLULAR LOCALISATION                                                                                             |                                             |
| CA1679 | 0.9 | 0.9 | 1.0 | 1.0 | 0.9 | 1.0 | IPF5180.3E  | complemer unknown function, 3-prime end                   |            | 18631 IPF5180.3e | No significant S.c. match                                                                                            |                                             |
| CA1680 | 1.0 | 1.0 | 0.9 | 1.1 | 1.0 | 1.1 | IPF15649    | complemer unknown function                                | orf19.4913 | 15649 IPF15649   | UNCLASSIFIED PROTEINS                                                                                                | molecular_function unknown                  |
| CA1681 | 1.0 | 1.1 | 1.0 | 1.1 | 1.0 | 1.0 | IPF12676    | 6863796.6 unknown function                                | orf19.4914 | 12676 IPF12676   | No significant S.c. match                                                                                            | molecular_function unknown                  |
| CA1682 | 1.2 | 1.2 | 1.0 | 1.0 | 1.1 | 1.0 | CIRT3       | complemer Putative transposase                            | orf19.4918 | 18629 CaCirt3    | No significant S.c. match                                                                                            |                                             |
| CA1683 | 0.9 | 0.9 | 1.0 | 0.9 | 0.9 | 0.9 | CIRT        | 6871560.6 Probable transposase                            | orf19.4919 | 18628 CaCirt     | No significant S.c. match                                                                                            |                                             |
| CA1684 | 1.0 | 1.0 | 1.0 | 1.0 | 1.0 | 1.2 | IPF6070     | 6873866.6 unknown function                                | orf19.4921 | 6070 IPF6070     | No significant S.c. match                                                                                            |                                             |
| CA1685 | 1.0 | 1.0 | 1.0 | 0.9 | 1.0 | 1.2 | IPF12270    | 6878314.6 unknown function                                | orf19.3660 | 12270 IPF12270   | No significant S.c. match                                                                                            |                                             |
| CA1686 | 1.0 | 1.0 | 1.1 | 1.0 | 1.1 | 1.1 | IPF12272    | complemer unknown function                                | orf19.3659 | 12272 IPF12272   | UNCLASSIFIED PROTEINS                                                                                                | molecular_function unknown                  |
| CA1687 | 1.0 | 1.0 | 1.0 | 1.1 | 1.0 | 1.1 | IPF12275    | 6880909.6 unknown function                                | orf19.3658 | 12275 IPF12275   | UNCLASSIFIED PROTEINS                                                                                                | molecular_function unknown                  |
| CA1688 | 1.0 | 1.0 | 1.1 | 1.0 | 0.9 | 1.0 | COX15       | complemer cytochrome oxidase assembly factor              | orf19.3656 | 13028 CaCOX15    | ENERGY ""PROTEIN FATE [folding modification destination] ""SUBCELLULAR LOCALISATION                                  | molecular_function unknown                  |
| CA1689 | 0.9 | 1.0 | 1.1 | 1.1 | 1.0 | 0.9 | IPF13030    | 6884979.6 unknown function                                | orf19.3655 | 13030 IPF13030   | No significant S.c. match                                                                                            |                                             |
| CA1690 | 1.1 | 1.0 | 1.0 | 1.1 | 0.9 | 1.1 | FAT1        | 6888232.6 very long-chain fatty acyl-CoA syn              | orf19.3653 | 13033 CaFAT1     | Lipid fatty-acid and isoprenoid metabolism ""SUBCELLULAR LOCALISATION                                                | ligase activity, transporter activity       |
| CA1691 | 1.1 | 0.9 | 3.0 | 2.5 | 1.9 | 2.0 | PGK1        | complemer Phosphoglycerate kinase                         | orf19.3651 | 17009 CaPGK1     | C-compound and carbohydrate metabolism ENERGY SUBCELLULAR LOCALISATION                                               | transferase activity                        |
| CA1692 | 0.9 | 1.0 | 1.0 | 0.9 | 0.9 | 1.0 | IPF17055.3E | 68893728.6 unknown function, 3-prime end                  | orf19.5036 | 17055 IPF17055.3 | UNCLASSIFIED PROTEINS                                                                                                | transporter activity                        |
| CA1693 | 0.9 | 1.0 | 1.0 | 1.0 | 1.0 | 0.9 | IPF17054    | complemer unknown function                                | orf19.5037 | 17054 IPF17054   | No significant S.c. match                                                                                            |                                             |
| CA1694 | 1.0 | 1.1 | 1.1 | 1.0 | 0.9 | 0.9 | TRM3        | 6897030.6 2-O-ribose methyltransferase (by                | orf19.5038 | 12305 CaTRM3     | TRANSCRIPTION                                                                                                        | transferase activity                        |
| CA1695 | 1.0 | 1.0 | 1.0 | 1.0 | 1.1 | 1.0 | RRP42       | complemer rRNA processing protein (by hom                 | orf19.5039 | 12306 CaRRP42    | TRANSCRIPTION                                                                                                        | RNA binding                                 |
| CA1696 | 1.0 | 1.0 | 1.1 | 1.1 | 1.1 | 1.0 | ASM4        | 6903004.6 similar to Saccharomyces cerevisi               | orf19.5040 | 12310 CaASM4     | CELL CYCLE AND DNA PROCESSING                                                                                        | structural molecule activity                |
| CA1697 | 0.9 | 1.0 | 1.0 | 1.0 | 1.0 | 0.9 | IPF16758    | 6907195.6 unknown function                                | orf19.5043 | 16758 IPF16758   | CELLULAR TRANSPORT AND TRANSPORT MECHANISMS SUBCELLULAR LOCALISATION                                                 |                                             |
| CA1698 | 1.1 | 1.0 | 1.0 | 0.9 | 1.0 | 1.0 | IPF15681    | 6911160.6 unknown function                                | orf19.5045 | 15681 IPF15681   | No significant S.c. match                                                                                            |                                             |
| CA1699 | 1.1 | 1.0 | 1.0 | 1.0 | 1.1 | 1.0 | RAM1.3F     | complemer protein farnesyltransferase, beta subunit, 3-pr |            | 19535 CaRAM1.3   | Lipid fatty-acid and isoprenoid metabolism ""PROTEIN FATE [folding modification destination] ""CELLULAR LOCALISATION | transferase activity                        |
| CA1700 | 1.0 | 1.0 | 1.0 | 1.1 | 1.0 | 0.9 | RAM1.5F     | complemer protein farnesyltransferase, beta s             | orf19.5046 | 19534 CaRAM1.5   | Lipid fatty-acid and isoprenoid metabolism ""PROTEIN FATE [folding m                                                 | transferase activity                        |
| CA1701 | 1.0 | 1.0 | 1.0 | 0.9 | 1.0 | 0.9 | CFL11       | 6919083.6 Ferric reductase (by homology)                  | orf19.701  | 7992 CaCFL11     | REGULATION OF/INTERACTION WITH CELLULAR ENVIRONMENT                                                                  | Other virulence attributes                  |
| CA1702 | 1.0 | 1.0 | 1.0 | 1.0 | 1.0 | 1.0 | HEL1        | complemer DNA helicase I (by homology)                    | orf19.702  | 7990 CaHEL1      | CELL CYCLE AND DNA PROCESSING CONTROL OF CELLULAR ORGANIZATION                                                       | DNA binding, helicase activity, RNA binding |
| CA1703 | 1.0 | 1.1 | 1.0 | 1.0 | 1.0 | 1.1 | IPF7987     | complemer unknown function                                | orf19.703  | 7987 IPF7987     | UNCLASSIFIED PROTEINS                                                                                                | hydrolase activity                          |
| CA1704 | 1.0 | 1.1 | 1.0 | 1.0 | 1.0 | 1.1 | SOL3        | complemer weak multicopy suppressor of los1               | orf19.704  | 19927 CaSOL3     | TRANSCRIPTION                                                                                                        | molecular_function unknown                  |
| CA1705 | 1.0 | 1.0 | 0.9 | 1.0 | 1.1 | 1.0 | GCN5        | complemer Histone acetyltransferase (by hom               | orf19.705  | 7983 CaGCN5      | CELL CYCLE AND DNA PROCESSING TRANSCRIPTION                                                                          | transferase activity                        |
| CA1706 | 1.0 | 1.1 | 1.0 | 1.0 | 1.1 | 1.0 | NMD3        | 6928772.6 rRNA binding (by homology)                      | orf19.706  | 7981 CaNMD3      | TRANSCRIPTION                                                                                                        | protein binding, RNA binding                |
| CA1708 | 1.0 | 1.0 | 0.9 | 1.1 | 1.0 | 1.0 | IPF7543     | 6936155.6 unknown function                                | orf19.4888 | 7543 IPF7543     | No significant S.c. match                                                                                            |                                             |
| CA1709 | 1.1 | 1.0 | 1.0 | 1.0 | 1.0 | 0.9 | HOL2        | complemer Multidrug-resistance protein subfa              | orf19.4889 | 7544 CaHOL2      | CELL RESCUE DEFENSE AND VIRULENCE ""TRANSPORT FACILITATION                                                           | transporter activity                        |
| CA1710 | 0.9 | 1.0 | 1.0 | 1.0 | 1.0 | 1.1 | CLA4        | complemer protein kinase homolog (by homol                | orf19.4890 | 16297 CaCLA4     | CELL CYCLE AND DNA PROCESSING CONTROL OF CELLULAR ORGANIZATION                                                       | protein kinase activity                     |
| CA1711 | 1.0 | 1.0 | 1.0 | 1.1 | 1.1 | 1.0 | POX18       | complemer Lipid-transfer protein (by homology)            | orf19.1084 | 17142 CaPOX18    | No significant S.c. match                                                                                            |                                             |
| CA1712 | 1.1 | 1.0 | 1.0 | 1.2 | 1.0 | 1.0 | ABC1        | 6950284.6 ubiquinol--cytochrome-c reductase               | orf19.1084 | 14939 CaABC1     | ENERGY ""PROTEIN FATE [folding modification destination] ""SUBCELLULAR LOCALISATION                                  | chaperone activity                          |
| CA1713 | 1.0 | 1.0 | 1.0 | 1.1 | 1.1 | 1.0 | IPF19743    | 6952488.6 unknown function                                | orf19.3332 | 19743 IPF19743   | UNCLASSIFIED PROTEINS                                                                                                | molecular_function unknown                  |
| CA1714 | 0.9 | 1.0 | 1.0 | 0.9 | 0.9 | 1.0 | NAB2        | 6955882.6 Nuclear poly(A)-RNA-binding prote               | orf19.3333 | 14410 CaNAB2     | TRANSCRIPTION SUBCELLULAR LOCALISATION                                                                               | RNA binding                                 |
| CA1715 | 0.9 | 1.1 | 1.0 | 1.0 | 1.0 | 1.1 | RPS21       | complemer ribosomal protein (by homology)                 | orf19.3334 | 14407 CaRPS21    | PROTEIN SYNTHESIS SUBCELLULAR LOCALISATION                                                                           | structural molecule activity                |
| CA1716 | 1.2 | 1.4 | 1.1 | 1.3 | 1.2 | 1.2 | IPF17237    | 6959696.6 unknown function                                | orf19.3335 | 17237 IPF17237   | No significant S.c. match                                                                                            |                                             |
| CA1717 | 1.0 | 1.0 | 1.0 | 0.9 | 1.0 | 1.0 | IPF9315     | complemer putative CCAAT-binding factor                   | orf19.4647 | 9315 IPF9315     | TRANSCRIPTION SUBCELLULAR LOCALISATION                                                                               |                                             |
| CA1718 | 0.9 | 1.0 | 1.0 | 1.0 | 1.0 | 1.0 | IPF9312     | complemer unknown function                                | orf19.4649 | 9312 IPF9312     | TRANSCRIPTION SUBCELLULAR LOCALISATION                                                                               |                                             |
| CA1719 | 1.1 | 0.9 | 1.0 | 1.0 | 0.9 | 0.9 | ILV6        | complemer acetolactate synthase, regulatory               | orf19.1211 | 9306 CaILV6      | Amino acid metabolism SUBCELLULAR LOCALISATION                                                                       | enzyme regulator activity                   |
| CA1720 | 1.0 | 1.0 | 1.0 | 1.1 | 1.0 | 1.1 | IPF15581    | complemer unknown function                                | orf19.1212 | 15581 IPF15581   | No significant S.c. match                                                                                            |                                             |
| CA1722 | 1.0 | 1.0 | 1.0 | 1.0 | 1.0 | 1.0 | TEF41       | 6987263.6 Probable translation elongation fac             | orf19.2652 | 16861 CaTEF41    | PROTEIN SYNTHESIS SUBCELLULAR LOCALISATION                                                                           |                                             |
| CA1723 | 1.0 | 1.0 | 0.9 | 1.0 | 1.1 | 1.0 | TEF4        | 6988340.6 translation elongation factor eEF1              | orf19.2651 | 16860 CaTEF4     | PROTEIN SYNTHESIS SUBCELLULAR LOCALISATION                                                                           | translation regulator activity              |

|        |     |     |     |     |     |     |              |                                                         |       |            |                                                                      |                                    |
|--------|-----|-----|-----|-----|-----|-----|--------------|---------------------------------------------------------|-------|------------|----------------------------------------------------------------------|------------------------------------|
| CA1724 | 1.0 | 1.0 | 1.1 | 1.0 | 0.9 | 1.0 | MRP10        | complemer Mitochondrial ribosomal protein (by homology) | 18618 | CaMRP10    | PROTEIN SYNTHESIS SUBCELLULAR LOCALISATION                           | structural molecule activity       |
| CA1725 | 1.0 | 1.0 | 1.0 | 1.0 | 1.0 | 0.9 | IPF15985     | complemer unknown function                              | 15985 | IPF15985   | No significant S.c. match                                            |                                    |
| CA1726 | 1.0 | 1.1 | 1.0 | 1.0 | 1.1 | 1.0 | IPF13021     | complemer unknown function                              | 13021 | IPF13021   | TRANSCRIPTION SUBCELLULAR LOCALISATION                               |                                    |
| CA1727 | 1.1 | 1.0 | 1.0 | 1.0 | 0.9 | 0.9 | IPF8448      | complemer unknown function                              | 8448  | IPF8448    | No significant S.c. match                                            |                                    |
| CA1728 | 0.9 | 0.9 | 1.0 | 1.0 | 1.0 | 1.0 | WHI3         | complemer Putative RNA binding protein (by homology)    | 8447  | CaWHI3     | CELL FATE                                                            | RNA binding                        |
| CA1729 | 0.9 | 1.0 | 1.0 | 1.0 | 1.0 | 1.1 | IPF8440      | 7008772..7 similar to Saccharomyces cerevisiae          | 8440  | IPF8440    | CELLULAR TRANSPORT AND TRANSPORT MECHANISMS SUBCELL                  | molecular_function unknown         |
| CA1730 | 0.9 | 1.0 | 1.0 | 1.0 | 1.0 | 1.0 | IPF8439      | 7009648..7 unknown function                             | 8439  | IPF8439    | UNCLASSIFIED PROTEINS                                                | molecular_function unknown         |
| CA1731 | 1.1 | 1.0 | 1.0 | 1.0 | 1.0 | 1.1 | IPF8437      | complemer putative DNA-directed RNA polym               | 8437  | IPF8437    | CELL CYCLE AND DNA PROCESSING TRANSCRIPTION SUBCELLULAR LOCALISATION |                                    |
| CA1732 | 0.9 | 1.0 | 1.0 | 1.0 | 1.1 | 1.0 | ECM42        | 7014851..7 Acetylornithine acetyltransferase (          | 3933  | CaECM42    | Amino acid metabolism SUBCELLULAR LOCALISATION                       | transferase activity               |
| CA1733 | 1.0 | 1.0 | 1.1 | 1.0 | 1.0 | 1.0 | IPF3931      | complemer Unknown function                              | 3931  | IPF3931    | UNCLASSIFIED PROTEINS                                                |                                    |
| CA1734 | 1.1 | 1.0 | 1.0 | 1.0 | 0.9 | 0.9 | IPF4988      | complemer unknown function                              | 4988  | IPF4988    | No significant S.c. match                                            |                                    |
| CA1735 | 1.0 | 1.1 | 1.1 | 1.0 | 1.0 | 1.0 | IPF4986      | complemer similar to Saccharomyces cerevisiae           | 4986  | IPF4986    | TRANSCRIPTION SUBCELLULAR LOCALISATION                               | transcription regulator activity   |
| CA1736 | 1.0 | 1.0 | 1.0 | 0.9 | 1.0 | 1.0 | IPF4983      | 7024104..7 unknown function                             | 4983  | IPF4983    | UNCLASSIFIED PROTEINS                                                | molecular_function unknown         |
| CA1737 | 1.0 | 0.9 | 1.0 | 0.9 | 1.1 | 1.0 | LYS12        | complemer homo-isocitrate dehydrogenase (b              | 4979  | CaLYS12    | Amino acid metabolism                                                | oxidoreductase activity            |
| CA1738 | 0.9 | 1.0 | 0.9 | 0.8 | 0.9 | 0.9 | MGE1         | complemer heat shock protein (by homology)              | 4977  | CaMGE1     | PROTEIN FATE [folding modification destination]                      | chaperone activity                 |
| CA1739 | 0.9 | 1.0 | 1.0 | 1.0 | 1.0 | 1.0 | IPF4976      | complemer unknown function                              | 4976  | IPF4976    | No significant S.c. match                                            |                                    |
| CA1740 | 1.0 | 0.9 | 1.0 | 1.0 | 1.0 | 1.1 | SMI1         | 7034065..7 beta-1,3-glucan synthesis protein            | 12215 | CaSMI1     | C-compound and carbohydrate metabolism SUBCELLULAR LOCALISA          | molecular_function unknown         |
| CA1741 | 1.0 | 1.1 | 1.0 | 1.1 | 0.9 | 1.0 | IPF12213     | complemer unknown function                              | 12213 | IPF12213   | No significant S.c. match                                            |                                    |
| CA1742 | 1.0 | 1.0 | 1.0 | 1.1 | 1.0 | 1.0 | IPF12210     | complemer quinolate phosphoribosyltransfer              | 12210 | IPF12210   | Metabolism of vitamins cofactors and prosthetic groups               | transferase activity               |
| CA1743 | 1.0 | 1.0 | 1.0 | 1.0 | 1.0 | 1.0 | IPF12209     | 7040457..7 similar to Saccharomyces cerevisiae          | 12209 | IPF12209   | CELL CYCLE AND DNA PROCESSING                                        | transferase activity               |
| CA1744 | 1.1 | 1.1 | 1.0 | 0.9 | 1.1 | 0.9 | IPF10889     | complemer unknown function                              | 10889 | IPF10889   | TRANSPORT FACILITATION                                               | transporter activity               |
| CA1745 | 1.0 | 1.0 | 1.0 | 1.0 | 1.0 | 1.0 | IPF10888     | 7042767..7 unknown function                             | 10888 | IPF10888   | No significant S.c. match                                            |                                    |
| CA1746 | 1.0 | 1.0 | 1.0 | 1.0 | 0.9 | 1.0 | IPF10886     | complemer unknown function                              | 10886 | IPF10886   | PROTEIN SYNTHESIS SUBCELLULAR LOCALISATION                           | molecular_function unknown         |
| CA1747 | 1.0 | 1.0 | 1.0 | 1.1 | 1.0 | 1.1 | IPF10884     | 7047421..7 unknown function                             | 10884 | IPF10884   | UNCLASSIFIED PROTEINS                                                | molecular_function unknown         |
| CA1748 | 1.0 | 1.1 | 1.1 | 0.9 | 0.9 | 1.0 | IPF8257      | 7052065..7 unknown function                             | 8257  | IPF8257    | No significant S.c. match                                            |                                    |
| CA1749 | 1.0 | 1.0 | 1.0 | 1.0 | 0.9 | 0.9 | IPF8257.3F   | 7055194..7 unknown function, 3-prime end                | 8253  | IPF8257.3f | No significant S.c. match                                            |                                    |
| CA1750 | 1.1 | 1.1 | 1.0 | 0.9 | 0.9 | 1.0 | IPF8252      | complemer unknown function                              | 8252  | IPF8252    | CELL CYCLE AND DNA PROCESSING SUBCELLULAR LOCALISATION               |                                    |
| CA1751 | 1.1 | 1.1 | 1.0 | 1.0 | 1.0 | 0.9 | ARO3.EXON2   | complemer 3-deoxy-D-arabinohepi3-deoxy-D-               | 8248  | CaARO3.e   | Amino acid metabolism SUBCELLULAR LOCALISATION                       | transferase activity               |
| CA1752 | 1.0 | 1.0 | 0.9 | 1.0 | 1.0 | 1.0 | UBP14        | complemer Ubiquitin-specific protease (by hom           | 8246  | CaUBP14    | Lipid fatty-acid and isoprenoid metabolism                           | peptidase activity                 |
| CA1753 | 1.1 | 1.1 | 1.0 | 1.0 | 1.0 | 1.0 | IPF8245      | 7064004..7 putative chitinase                           | 8245  | IPF8245    | C-compound and carbohydrate metabolism                               | molecular_function unknown         |
| CA1754 | 0.9 | 0.9 | 0.9 | 1.1 | 1.0 | 1.1 | IPF16320     | 7068168..7 Unknown function                             | 16320 | IPF16320   | UNCLASSIFIED PROTEINS                                                | molecular_function unknown         |
| CA1755 | 1.0 | 1.0 | 1.1 | 0.9 | 0.9 | 1.1 | PDI1         | complemer protein disulfide-isomerase precu             | 16217 | CaPDI1     | Lipid fatty-acid and isoprenoid metabolism                           | oxidoreductase activity, isomerase |
| CA1756 | 0.9 | 1.1 | 1.0 | 1.0 | 1.0 | 1.1 | IPF14562     | complemer unknown function                              | 14562 | IPF14562   | No significant S.c. match                                            |                                    |
| CA1757 | 1.0 | 0.9 | 1.1 | 1.0 | 1.0 | 1.0 | IPF14559.5F  | 7075780..7 unknown function, 5-prime end                | 14559 | IPF14559.5 | No significant S.c. match                                            |                                    |
| CA1758 | 0.9 | 1.0 | 0.9 | 1.0 | 1.0 | 1.0 | IPF14559.3F  | 7076649..7 unknown function, 3-prime end                | 14556 | IPF14559.3 | TRANSCRIPTION REGULATION OF/INTERACTION WITH CELLULAR                | RNA binding                        |
| CA1759 | 1.1 | 1.3 | 0.9 | 1.0 | 1.0 | 1.0 | IPF14744     | complemer unknown function                              | 14744 | IPF14744   | UNCLASSIFIED PROTEINS                                                | molecular_function unknown         |
| CA1760 | 1.0 | 1.0 | 1.0 | 0.9 | 1.0 | 1.0 | IPF17914.3EC | complemer unknown function                              | 17914 | IPF17914.3 | CONTROL OF CELLULAR ORGANIZATION                                     |                                    |
| CA1761 | 0.9 | 0.9 | 0.9 | 0.9 | 0.9 | 1.0 | IPF7602      | 7085435..7 oxidoreductase (by homology)                 | 7602  | IPF7602    | Lipid fatty-acid and isoprenoid metabolism                           |                                    |
| CA1762 | 1.0 | 0.9 | 0.9 | 0.9 | 0.9 | 1.0 | IPF20014     | 7086420..7 oxidoreductase by homology                   | 19928 | IPF20014   | Lipid fatty-acid and isoprenoid metabolism                           | molecular_function unknown         |
| CA1763 | 1.1 | 1.0 | 1.0 | 1.0 | 1.0 | 1.1 | URA6         | 7087454..7 Uridine-monophosphate kinase(by              | 7599  | CaURA6     | Nucleotide metabolism SUBCELLULAR LOCALISATION                       | transferase activity               |
| CA1764 | 1.0 | 0.9 | 0.9 | 0.9 | 1.0 | 1.0 | IPF7596      | 7088486..7 similar to Saccharomyces cerevisiae          | 7596  | IPF7596    | TRANSCRIPTION                                                        | isomerase activity                 |
| CA1765 | 1.1 | 1.0 | 1.0 | 1.0 | 1.1 | 1.1 | APE2         | 7089585..7 aminopeptidase yscI                          | 7593  | CaAPE2     | Amino acid metabolism ""PROTEIN FATE [folding modification destinati | peptidase activity                 |
| CA1766 | 0.9 | 1.0 | 0.9 | 1.0 | 1.0 | 1.1 | NOP4         | 7092793..7 Nucleolar protein                            | 7589  | CaNOP4     | TRANSCRIPTION SUBCELLULAR LOCALISATION                               | RNA binding                        |
| CA1767 | 1.1 | 1.1 | 1.1 | 1.0 | 1.0 | 1.0 | SIT4         | complemer Ser/thr protein phosphatase                   | 7586  | CaSIT4     | CELL CYCLE AND DNA PROCESSING CELL FATE                              | protein phosphatase activity       |
| CA1768 | 1.0 | 1.0 | 0.9 | 0.9 | 1.0 | 1.0 | IPF7585      | 7096998..7 unknown function                             | 7585  | IPF7585    | PROTEIN SYNTHESIS                                                    | structural molecule activity       |
| CA1769 | 1.0 | 1.0 | 1.0 | 0.9 | 0.9 | 1.0 | IPF7581      | 7099629..7 unknown function                             | 19744 | IPF7581    | No significant S.c. match                                            |                                    |
| CA1770 | 1.0 | 1.0 | 0.9 | 1.1 | 1.0 | 1.0 | IPF12457     | 7104740..7 unknown function                             | 12457 | IPF12457   | UNCLASSIFIED PROTEINS                                                | molecular_function unknown         |
| CA1771 | 1.1 | 1.0 | 1.0 | 1.0 | 1.1 | 1.0 | SEH1         | complemer nuclear pore protein (by homology)            | 12458 | CaSEH1     | CELLULAR TRANSPORT AND TRANSPORT MECHANISMS CELL FA                  | structural molecule activity       |
| CA1772 | 1.0 | 1.0 | 1.0 | 0.9 | 1.0 | 1.0 | ALG7         | 7107522..7 UDP-N-acetylglucosamine-1-phos               | 12460 | CaALG7     | Phosphate metabolism C-compound and carbohydrate metabolism CELL     | transferase activity               |
| CA1773 | 0.9 | 1.1 | 1.1 | 1.1 | 1.0 | 1.0 | VRP1         | 7109211..7 verprolin (by homology)                      | 12461 | CaVRP1     | CELLULAR TRANSPORT AND TRANSPORT MECHANISMS CELL FA                  | protein binding                    |
| CA1774 | 0.9 | 1.0 | 1.0 | 1.0 | 1.0 | 1.0 | IPF7498      | complemer unknown function                              | 7498  | IPF7498    | UNCLASSIFIED PROTEINS                                                | molecular_function unknown         |
| CA1775 | 0.9 | 1.1 | 0.9 | 0.6 | 0.8 | 0.9 | GDH2         | complemer NAD-specific glutamate dehydroge              | 19745 | CaGDH2     | Amino acid metabolism Nitrogen and sulphur metabolism SUBCELLUL      | oxidoreductase activity            |
| CA1776 | 0.9 | 1.0 | 1.0 | 1.1 | 1.0 | 0.9 | IPF14704     | complemer unknown function                              | 14704 | IPF14704   | UNCLASSIFIED PROTEINS                                                |                                    |
| CA1777 | 1.0 | 1.0 | 1.1 | 1.0 | 1.0 | 0.9 | IPF14706     | complemer unknown function                              | 14706 | IPF14706   | No significant S.c. match                                            |                                    |
| CA1778 | 1.1 | 1.1 | 1.1 | 1.0 | 1.0 | 1.0 | IPF13810.3   | complemer unknown function, 3-prime end                 | 13810 | IPF13810.3 | No significant S.c. match                                            |                                    |
| CA1779 | 1.0 | 0.6 | 0.8 | 0.7 | 0.9 | 0.9 | IPF14510     | 7131977..7 unknown function                             | 14510 | IPF14510   | UNCLASSIFIED PROTEINS                                                | molecular_function unknown         |
| CA1780 | 1.0 | 1.1 | 1.0 | 1.0 | 1.0 | 0.9 | IPF14509     | 7134782..7 unknown function                             | 14509 | IPF14509   | UNCLASSIFIED PROTEINS                                                |                                    |
| CA1781 | 0.9 | 1.0 | 1.1 | 1.0 | 1.0 | 1.1 | IPF14508     | complemer unknown function                              | 14508 | IPF14508   | UNCLASSIFIED PROTEINS                                                | molecular_function unknown         |
| CA1782 | 1.1 | 1.6 | 1.4 | 1.5 | 1.3 | 1.3 | PHO84.3EOC   | 7138851..7 Inorganic phosphate transport prot           | 7638  | CaPHO84.   | Phosphate metabolism CELLULAR TRANSPORT AND TRANSPORT MI             | transporter activity               |
| CA1783 | 0.9 | 0.9 | 1.0 | 1.0 | 1.0 | 0.9 | IPF7635      | complemer unknown function                              | 7635  | IPF7635    | No significant S.c. match                                            |                                    |
| CA1784 | 1.1 | 1.1 | 1.0 | 1.0 | 1.0 | 1.0 | ARO7         | complemer chorismate mutase (by homology)               | 7632  | CaARO7     | Amino acid metabolism SUBCELLULAR LOCALISATION                       | isomerase activity                 |
| CA1785 | 1.0 | 1.0 | 0.9 | 0.9 | 1.0 | 0.9 | IPF7631      | complemer unknown function                              | 7631  | IPF7631    | UNCLASSIFIED PROTEINS                                                | molecular_function unknown         |
| CA1786 | 1.0 | 1.0 | 1.0 | 1.1 | 1.1 | 1.1 | IPF7629      | complemer unknown function                              | 7629  | IPF7629    | No significant S.c. match                                            |                                    |
| CA1787 | 1.0 | 1.0 | 1.0 | 1.0 | 1.0 | 0.9 | IFH3         | complemer Dioxxygenase (by homology)                    | 19929 | CaIFH3     | CELL RESCUE DEFENSE AND VIRULENCE                                    | oxidoreductase activity            |
| CA1788 | 1.0 | 1.0 | 1.0 | 0.9 | 0.9 | 1.0 | USO1.3       | complemer Cytoskeletal-related transport prot           | 7623  | CaUSO1.3   | UNCLASSIFIED PROTEINS                                                | molecular_function unknown         |
| CA1789 | 1.0 | 1.1 | 1.0 | 0.9 | 1.1 | 1.1 | GAR1         | 7154269..7 Nucleolar rRNA processing proteir            | 7621  | CaGAR1     | TRANSCRIPTION SUBCELLULAR LOCALISATION                               | RNA binding                        |
| CA1790 | 1.1 | 1.0 | 1.1 | 1.0 | 1.0 | 1.0 | IPF13971     | 7156384..7 unknown function                             | 13971 | IPF13971   | UNCLASSIFIED PROTEINS                                                | molecular_function unknown         |
| CA1791 | 0.9 | 0.9 | 1.1 | 1.1 | 1.0 | 1.1 | IPF13967     | 7158856..7 unknown function                             | 13967 | IPF13967   | UNCLASSIFIED PROTEINS                                                |                                    |
| CA1792 | 1.1 | 0.9 | 1.0 | 1.0 | 1.0 | 1.0 | IPF13966     | complemer unknown function                              | 13966 | IPF13966   | UNCLASSIFIED PROTEINS                                                | molecular_function unknown         |
| CA1793 | 1.0 | 0.9 | 1.0 | 1.1 | 1.0 | 0.9 | IPF18608.5F  | 7162049..7 unknown function, 5-prime end                | 18608 | IPF18608.5 | CLASSIFICATION NOT YET CLEAR-CUT                                     |                                    |
| CA1794 | 1.0 | 1.0 | 1.0 | 0.9 | 1.0 | 0.9 | IPF18608.3F  | 7162608..7 unknown function, 3-prime end                | 11262 | IPF18608.3 | CLASSIFICATION NOT YET CLEAR-CUT                                     | molecular_function unknown         |
| CA1795 | 0.9 | 1.0 | 1.1 | 1.0 | 1.0 | 1.0 | IPF11261     | complemer unknown function                              | 11261 | IPF11261   | UNCLASSIFIED PROTEINS                                                | molecular_function unknown         |

|        |     |     |     |     |     |     |              |                                                  |             |                  |                                                                                             |                                    |
|--------|-----|-----|-----|-----|-----|-----|--------------|--------------------------------------------------|-------------|------------------|---------------------------------------------------------------------------------------------|------------------------------------|
| CA1796 | 1.0 | 1.0 | 0.9 | 1.0 | 1.0 | 1.0 | IPF11259     | complemer unknown function                       | orf19.5210  | 11259 IPF11259   | TRANSCRIPTION                                                                               | DNA binding,transcription regulato |
| CA1797 | 1.0 | 1.0 | 1.0 | 1.0 | 1.0 | 1.2 | NUM12        | 7171839..7 nuclear migration protein (by hom     | orf19.2924  | 15988 CaNUM12    | CELL CYCLE AND DNA PROCESSING                                                               |                                    |
| CA1798 | 1.0 | 0.9 | 0.9 | 1.0 | 1.0 | 1.0 | IPF11448     | complemer unknown function                       | orf19.2923  | 11448 IPF11448   | UNCLASSIFIED PROTEINS                                                                       |                                    |
| CA1799 | 0.9 | 1.0 | 1.0 | 1.0 | 1.0 | 1.0 | IPF11446     | complemer unknown function                       | orf19.2922  | 11446 IPF11446   | No significant S.c. match                                                                   |                                    |
| CA1800 | 1.0 | 0.9 | 1.0 | 1.0 | 1.0 | 1.0 | IPF11445     | 7179826..7 similar to Saccharomyces cerevisi     | orf19.2921  | 11445 IPF11445   | CELL CYCLE AND DNA PROCESSING SUBCELLULAR LOCALISATIO                                       | chaperone activity                 |
| CA1801 | 1.0 | 1.0 | 1.0 | 1.0 | 1.1 | 1.0 | IPF11444     | complemer unknown function                       | orf19.2920  | 11444 IPF11444   | UNCLASSIFIED PROTEINS                                                                       | RNA binding                        |
| CA1802 | 1.1 | 1.0 | 1.0 | 1.0 | 0.9 | 1.0 | IPF11443     | complemer unknown function                       | orf19.2919  | 11443 IPF11443   | CELL CYCLE AND DNA PROCESSING ""CELL RESCUE DEFENSE AND                                     | RNA binding,helicase activity      |
| CA1803 | 0.9 | 1.0 | 1.0 | 1.0 | 1.0 | 1.0 | IPF16748     | complemer unknown function                       | orf19.2917  | 16748 IPF16748   | CELLULAR TRANSPORT AND TRANSPORT MECHANISMS                                                 | molecular_function unknown         |
| CA1804 | 1.0 | 1.0 | 1.0 | 1.0 | 1.0 | 0.8 | TAF17        | 7190946..7 TFIID and SAGA subunit (by hom        | orf19.1111  | 6333 CaTAF17     | TRANSCRIPTION SUBCELLULAR LOCALISATION                                                      | transcription regulator activity   |
| CA1805 | 1.0 | 1.0 | 1.1 | 1.0 | 1.0 | 0.9 | IPF6332      | 7191994..7 similar to Saccharomyces cerevisi     | orf19.1112  | 6332 IPF6332     | C-compound and carbohydrate metabolism                                                      | molecular_function unknown         |
| CA1806 | 1.0 | 1.0 | 1.1 | 1.0 | 1.0 | 0.9 | IPF6329      | 7194761..7 unknown function                      | orf19.1113  | 6329 IPF6329     | No significant S.c. match                                                                   |                                    |
| CA1807 | 1.0 | 1.0 | 1.0 | 1.1 | 1.0 | 1.1 | IPF6328      | complemer unknown function                       | orf19.1114  | 6328 IPF6328     | UNCLASSIFIED PROTEINS                                                                       | molecular_function unknown         |
| CA1808 | 1.0 | 1.1 | 1.0 | 1.0 | 1.1 | 1.0 | GUK1         | complemer Guanylate kinase (by homology)         | orf19.1115  | 6326 CaGUK1      | Nucleotide metabolism                                                                       | transferase activity               |
| CA1809 | 0.9 | 1.0 | 1.0 | 0.9 | 0.9 | 0.8 | IPF6325      | 7198001..7 unknown function                      | orf19.1116  | 6325 IPF6325     | No significant S.c. match                                                                   |                                    |
| CA1810 | 1.0 | 1.0 | 0.9 | 1.0 | 1.0 | 1.1 | FDH2         | 7199805..7 Formate dehydrogenase (by hom         | orf19.1117  | 6323 CaFDH2      | ENERGY                                                                                      |                                    |
| CA1811 | 1.0 | 1.0 | 1.0 | 1.0 | 1.0 | 1.0 | MTR10        | 7201350..7 Involved in nuclear protein import    | orf19.1119  | 6321 CaMTR10     | TRANSCRIPTION CELLULAR TRANSPORT AND TRANSPORT MECHANISMS SUBCELLULAR LOCALIS               |                                    |
| CA1812 | 1.0 | 1.1 | 1.1 | 1.1 | 0.9 | 1.0 | IPF13879     | complemer unknown function                       | orf19.1120  | 13879 IPF13879   | No significant S.c. match                                                                   |                                    |
| CA1814 | 1.0 | 1.0 | 0.9 | 1.0 | 1.0 | 1.1 | TRA1.5EOC    | complemer ATM/Mec1/TOR1+2-related, 5-prir        | orf19.139   | 14787 CaTRA1.5   | TRANSCRIPTION                                                                               |                                    |
| CA1815 | 0.9 | 0.9 | 1.0 | 1.0 | 1.0 | 0.9 | IPF18606     | complemer unknown function                       | orf19.138   | 18606 IPF18606   | CELL FATE SUBCELLULAR LOCALISATION                                                          | molecular_function unknown         |
| CA1816 | 1.0 | 1.0 | 1.0 | 1.0 | 0.9 | 1.0 | IPF7020      | 7219916..7 unknown function                      | orf19.136   | 7020 IPF7020     | CELL RESCUE DEFENSE AND VIRULENCE ""TRANSPORT FACILITA                                      | molecular_function unknown         |
| CA1817 | 0.9 | 0.9 | 1.1 | 1.1 | 0.9 | 1.1 | IPF7021      | complemer similar to Saccharomyxunnamed          | porf19.135  | 7021 IPF7021     | CELLULAR TRANSPORT AND TRANSPORT MECHANISMS SUBCELL                                         | molecular_function unknown         |
| CA1818 | 1.1 | 1.0 | 0.9 | 1.1 | 1.0 | 1.1 | IPF7023.3    | complemer unknown function, 3-prime end          | orf19.134   | 7023 IPF7023.3   | No significant S.c. match                                                                   |                                    |
| CA1819 | 1.2 | 1.1 | 1.0 | 1.1 | 1.0 | 1.0 | IPF16549     | 7233471..7 Unknown function                      | orf19.4273  | 16549 IPF16549   | TRANSCRIPTION SUBCELLULAR LOCALISATION                                                      | molecular_function unknown         |
| CA1820 | 1.0 | 1.0 | 1.0 | 1.0 | 1.0 | 1.0 | IPF9529      | complemer probable mannosyltransferase (by       | orf19.4270  | 9529 IPF9529     | C-compound and carbohydrate metabolism ""PROTEIN FATE [folding modification destination] "" |                                    |
| CA1821 | 1.1 | 1.0 | 0.9 | 1.0 | 1.0 | 1.0 | IPF9527      | 7240345..7 unknown function                      | orf19.4269  | 9527 IPF9527     | UNCLASSIFIED PROTEINS                                                                       |                                    |
| CA1822 | 1.0 | 1.0 | 1.1 | 0.9 | 1.0 | 1.0 | IPF9525      | 7242308..7 unknown function                      | orf19.4268  | 9525 IPF9525     | UNCLASSIFIED PROTEINS                                                                       | RNA binding                        |
| CA1823 | 1.0 | 1.0 | 0.9 | 1.0 | 1.0 | 0.9 | IPF9522.5F   | 7244770..7 septin, 5-prime end (by homology)     | orf19.4267  | 9524 IPF9522.5f  | C-compound and carbohydrate metabolism CELL CYCLE AND DNA PROCESSING CELL FATE SUBCELL      |                                    |
| CA1825 | 1.0 | 1.0 | 1.0 | 1.0 | 0.9 | 1.0 | IPF9522.3F   | 7245596..7 septin, 3-prime end (by homology)     | orf19.4266  | 9522 IPF9522.3f  | CELL CYCLE AND DNA PROCESSING CELL FATE SUBCELLULAR LOCALISATION                            |                                    |
| CA1826 | 0.9 | 1.0 | 1.0 | 1.0 | 1.0 | 1.0 | UAP1         | complemer UDP-N-acetylglucosan UDP-N-ace         | orf19.4265  | 9521 CaUAP1      | CONTROL OF CELLULAR ORGANIZATION                                                            | nucleotidyltransferase activity    |
| CA1827 | 1.0 | 1.0 | 1.0 | 1.0 | 1.1 | 1.0 | IPF9520      | complemer unknown function                       | orf19.1174i | 9520 IPF9520     | No significant S.c. match                                                                   |                                    |
| CA1828 | 0.9 | 1.1 | 1.0 | 1.0 | 1.1 | 1.1 | CDC22.3EOC   | 7252360..7 DNA Polymerase III, 3-prime end       |             | 17179 CaCDC22.   | CELL CYCLE AND DNA PROCESSING SUBCELLULAR LOCALISATION                                      |                                    |
| CA1829 | 1.0 | 1.1 | 1.0 | 1.0 | 1.0 | 0.9 | IPF17177.3F  | complemer similar to Saccharomyxregulator o      | orf19.5184  | 17178 IPF17177.3 | TRANSCRIPTION CELLULAR TRANSPORT AND TRANSPORT MECH                                         | signal transducer activity         |
| CA1830 | 1.0 | 1.0 | 1.0 | 1.2 | 1.2 | 1.2 | IPF17177.5F  | complemer similar to Saccharomyces cerevisi      | orf19.5185  | 17177 IPF17177.5 | TRANSCRIPTION CELLULAR TRANSPORT AND TRANSPORT MECHANISMS CELL FATE SUBCELLUL               |                                    |
| CA1831 | 1.1 | 1.1 | 1.0 | 1.0 | 0.9 | 1.0 | CHS1         | complemer Chitin synthase (by hcchitin synth     | orf19.5188  | 6129 CaCHS1      | C-compound and carbohydrate metabolism CELL FATE SUBCELLULARtransferase activity            |                                    |
| CA1832 | 1.0 | 1.0 | 0.9 | 1.0 | 1.1 | 1.0 | IPF17727     | complemer unknown function                       | orf19.5190  | 17727 IPF17727   | CELL CYCLE AND DNA PROCESSING CELLULAR TRANSPORT AND TRANSPORT MECHANISMS CEL               |                                    |
| CA1834 | 1.2 | 0.8 | 1.1 | 1.6 | 1.2 | 1.3 | PFK1         | complemer 6-phosphofructokinasephosphofru        | orf19.3967  | 5769 CaPFK1      | C-compound and carbohydrate metabolism ENERGY SUBCELLULAR L+transferase activity            |                                    |
| CA1835 | 1.0 | 0.9 | 1.0 | 1.2 | 1.0 | 1.0 | CRH12        | complemer Cell wall protein (by homology)        | orf19.3966  | 5772 CaCRH12     | SUBCELLULAR LOCALISATION                                                                    |                                    |
| CA1836 | 1.0 | 1.0 | 1.0 | 1.0 | 1.0 | 1.0 | IPF5773      | 7279135..7 unknown function                      | orf19.3965  | 5773 IPF5773     | No significant S.c. match                                                                   |                                    |
| CA1837 | 1.1 | 1.0 | 0.9 | 1.0 | 1.1 | 1.0 | IPF5776      | complemer ash2-trithorax family protein (by h    | orf19.3964  | 5776 IPF5776     | UNCLASSIFIED PROTEINS                                                                       | transcription regulator activity   |
| CA1838 | 1.0 | 1.0 | 1.0 | 0.9 | 1.0 | 1.0 | IPF5777      | complemer unknown function                       | orf19.3963  | 5777 IPF5777     | UNCLASSIFIED PROTEINS                                                                       | molecular_function unknown         |
| CA1839 | 1.2 | 1.1 | 0.9 | 1.1 | 1.0 | 1.0 | IPF4435      | 7284774..7 unknown function                      | orf19.4711  | 4435 IPF4435     | UNCLASSIFIED PROTEINS                                                                       | molecular_function unknown         |
| CA1840 | 0.9 | 1.0 | 0.9 | 1.1 | 1.0 | 1.0 | IFP3         | complemer Unknown function                       | orf19.4707  | 4440 CaIFP3      | No significant S.c. match                                                                   |                                    |
| CA1841 | 1.1 | 1.1 | 1.0 | 1.0 | 0.9 | 1.1 | CCA1         | 7291739..7 tRNA nucleotidyltransferase (by h     | orf19.4705  | 4444 CaCCA1      | TRANSCRIPTION SUBCELLULAR LOCALISATION                                                      | nucleotidyltransferase activity    |
| CA1842 | 0.9 | 1.1 | 1.0 | 1.1 | 1.1 | 1.0 | ARO1         | 7293668..7 arom pentafunctional enzyme (by       | orf19.4704  | 4446 CaARO1      | Amino acid metabolism SUBCELLULAR LOCALISATION                                              | transferase activity               |
| CA1843 | 1.0 | 1.0 | 1.0 | 0.9 | 0.9 | 1.0 | IPF11364     | complemer unknown function                       | orf19.635   | 11384 IPF11364   | No significant S.c. match                                                                   |                                    |
| CA1844 | 1.0 | 1.0 | 1.0 | 1.1 | 1.0 | 1.0 | IFL5.3       | complemer unknown function, 3-prime end          | orf19.654   | 19930 CaIFL5.3   | CELL RESCUE DEFENSE AND VIRULENCE ""CELL FATE                                               |                                    |
| CA1845 | 1.0 | 1.1 | 1.0 | 1.0 | 0.9 | 0.9 | IPF11123     | 7311134..7 similar to Saccharomyces cerevisi     | orf19.637   | 11123 IPF11123   | ENERGY SUBCELLULAR LOCALISATION                                                             | oxidoreductase activity            |
| CA1846 | 1.3 | 1.3 | 1.2 | 1.3 | 1.2 | 1.4 | FDH12        | 7313358..7 Formate dehydrogenase (by hom         | orf19.638   | 11124 CaFDH12    | ENERGY                                                                                      | oxidoreductase activity            |
| CA1847 | 1.1 | 1.0 | 1.0 | 1.0 | 0.9 | 0.9 | IPF11127     | 7314688..7 unknown function                      | orf19.639   | 11127 IPF11127   | UNCLASSIFIED PROTEINS                                                                       |                                    |
| CA1848 | 1.0 | 1.0 | 0.9 | 1.0 | 0.9 | 1.0 | IPF11128     | complemer unknown function                       |             | 11128 IPF11128   | PROTEIN SYNTHESIS SUBCELLULAR LOCALISATION                                                  | structural molecule activity       |
| CA1849 | 1.0 | 1.0 | 0.9 | 1.1 | 0.9 | 1.0 | IPF19932     | complemer unknown function                       | orf19.640   | 19932 IPF19932   | UNCLASSIFIED PROTEINS                                                                       |                                    |
| CA1850 | 1.1 | 1.0 | 1.1 | 1.0 | 0.9 | 1.0 | IPF14630     | 7317320..7 unknown function                      | orf19.641   | 14630 IPF14630   | PROTEIN FATE [folding modification destination]                                             | molecular_function unknown         |
| CA1851 | 1.0 | 1.0 | 1.0 | 1.0 | 1.0 | 1.0 | SAP155       | complemer Cell cycle protein, interacts with Si  | orf19.642   | 14629 CaSAP155   | CELL CYCLE AND DNA PROCESSING CELL FATE                                                     |                                    |
| CA1852 | 0.9 | 1.0 | 1.0 | 1.0 | 1.0 | 0.9 | IPF13885.REF | 7322082..7 unknown function, 5-prime end         |             | 14628 IPF13885.r | No significant S.c. match                                                                   |                                    |
| CA1853 | 1.0 | 1.1 | 1.0 | 1.0 | 1.1 | 0.9 | LYP1         | 7325015..7 lysine-specific high-affinity permea  | orf19.651   | 16499 CaLYP1     | Amino acid metabolism CELLULAR TRANSPORT AND TRANSPORT MECHANISMS SUBCELLULAR LOI           |                                    |
| CA1854 | 1.1 | 1.1 | 1.0 | 1.0 | 1.0 | 1.0 | IPF12611     | 7327934..7 unknown function                      | orf19.649   | 12611 IPF12611   | UNCLASSIFIED PROTEINS                                                                       | molecular_function unknown         |
| CA1855 | 1.2 | 1.4 | 1.1 | 1.3 | 1.1 | 1.1 | GLN1         | 7336170..7 glutamate-ammonia ligase (by hor      | orf19.646   | 15149 CaGLN1     | Amino acid metabolism Nitrogen and sulphur metabolism SUBCELLUL/Ligase activity             |                                    |
| CA1856 | 1.0 | 1.0 | 1.0 | 1.1 | 1.1 | 1.1 | IPF13689     | 7343526..7 unknown function                      | orf19.9081  | 13689 IPF13689   | No significant S.c. match                                                                   |                                    |
| CA1857 | 1.0 | 1.0 | 0.9 | 1.0 | 1.0 | 1.0 | IPF15348     | 7345494..7 unknown function                      | orf19.9080  | 15348 IPF15348   | UNCLASSIFIED PROTEINS                                                                       |                                    |
| CA1858 | 1.0 | 1.0 | 1.0 | 1.1 | 1.1 | 0.9 | IPF15344     | 7349681..7 unknown function                      | orf19.9076  | 15344 IPF15344   | UNCLASSIFIED PROTEINS                                                                       |                                    |
| CA1859 | 0.9 | 0.9 | 1.0 | 0.9 | 1.0 | 1.1 | IPF19614     | 7358890..7 putative transcription factor similar | orf19.9073  | 19614 IPF19614   | TRANSCRIPTION                                                                               |                                    |
| CA1860 | 0.9 | 1.1 | 1.0 | 1.0 | 1.0 | 1.0 | UTR4         | 7361856..7 unknown function                      | orf19.9072  | 16638 CaUTR4     | Amino acid metabolism                                                                       | molecular_function unknown         |
| CA1861 | 1.0 | 0.9 | 1.0 | 1.0 | 1.0 | 1.0 | RAD32        | 7364965..7 DNA repair protein (by homology)      | orf19.866   | 15212 CaRAD32    | CELL CYCLE AND DNA PROCESSING                                                               | nucleotidyltransferase activity    |
| CA1862 | 1.0 | 1.1 | 1.0 | 1.0 | 1.1 | 1.1 | NMD2         | complemer Nonsense-mediated mRNA decay           | orf19.864   | 7641 CaNMD2      | Nucleotide metabolism PROTEIN SYNTHESIS SUBCELLULAR LOCAL                                   | protein binding                    |
| CA1863 | 0.9 | 0.9 | 1.0 | 1.0 | 0.9 | 1.0 | MRPL35       | complemer Ribosomal protein of the large sub     | orf19.863   | 7643 CaMRPL35    | PROTEIN SYNTHESIS SUBCELLULAR LOCALISATION                                                  | structural molecule activity       |
| CA1864 | 0.9 | 0.9 | 1.0 | 1.0 | 1.0 | 0.9 | IPF7644      | complemer unknown function                       | orf19.862   | 7644 IPF7644     | No significant S.c. match                                                                   |                                    |
| CA1865 | 1.0 | 1.0 | 0.9 | 1.1 | 0.9 | 0.9 | IPF7646      | complemer putative transcription factor (by ho   | orf19.861   | 7646 IPF7646     | TRANSCRIPTION SUBCELLULAR LOCALISATION                                                      |                                    |
| CA1866 | 1.1 | 1.1 | 1.0 | 1.1 | 1.0 | 1.0 | IPF7647      | 7374630..7 unknown function                      | orf19.860   | 7647 IPF7647     | No significant S.c. match                                                                   |                                    |
| CA1868 | 1.0 | 1.0 | 1.0 | 1.0 | 0.9 | 1.0 | IPF14501.3EC | 7380194..7 putative G-protein, -transducin typ   | orf19.9992  | 18597 IPF14501.3 | UNCLASSIFIED PROTEINS                                                                       | molecular_function unknown         |
| CA1869 | 1.2 | 1.2 | 1.1 | 1.1 | 1.2 | 1.1 | IPF15822     | complemer unknown function                       | orf19.9993  | 15822 IPF15822   | No significant S.c. match                                                                   |                                    |
| CA1870 | 1.0 | 1.0 | 1.0 | 1.1 | 1.1 | 0.9 | IPF16981.EXC | complemer unknown function, exon 2               | orf19.9994  | 16981 IPF16981.ε | UNCLASSIFIED PROTEINS                                                                       |                                    |
| CA1871 | 1.0 | 0.9 | 1.0 | 1.1 | 1.0 | 1.0 | IPF16981.EXC | complemer unknown function, exon 1               | orf19.9995  | 18595 IPF16981.ε | UNCLASSIFIED PROTEINS                                                                       | molecular_function unknown         |

|        |     |     |     |     |     |     |             |                                                         |             |       |            |                                                                                      |                                                       |
|--------|-----|-----|-----|-----|-----|-----|-------------|---------------------------------------------------------|-------------|-------|------------|--------------------------------------------------------------------------------------|-------------------------------------------------------|
| CA1872 | 1.0 | 1.0 | 1.0 | 1.0 | 1.0 | 1.0 | IPF6700     | complemer unknown function                              | orf19.2459  | 6700  | IPF6700    | No significant S.c. match                                                            |                                                       |
| CA1873 | 1.0 | 1.0 | 1.0 | 1.1 | 1.0 | 0.9 | IPF6696     | complemer unknown function                              | orf19.9997  | 6696  | IPF6696    | No significant S.c. match                                                            |                                                       |
| CA1874 | 1.0 | 0.9 | 1.0 | 1.0 | 0.9 | 0.9 | TPK2        | 7401744..7 cAMP-dependent protein kinase 2              | orf19.2277  | 10304 | CaTPK2     | TRANSCRIPTION REGULATION OF/INTERACTION WITH CELLULAR                                | protein kinase activity                               |
| CA1875 | 1.1 | 1.0 | 1.1 | 1.0 | 1.0 | 1.2 | RPB9        | complemer DNA-directed RNA polymerase II                | (orf19.2276 | 10302 | CaRPB9     | TRANSCRIPTION SUBCELLULAR LOCALISATION                                               | nucleotidyltransferase activity                       |
| CA1876 | 1.0 | 1.1 | 1.0 | 1.0 | 1.1 | 1.1 | IPF10301    | 7404401..7 putative 60S ribosomal protein L7            | orf19.2275  | 10301 | IPF10301   | PROTEIN SYNTHESIS SUBCELLULAR LOCALISATION                                           | molecular_function unknown                            |
| CA1877 | 0.9 | 1.0 | 1.0 | 1.0 | 1.0 | 1.0 | IPF10300    | complemer unknown function                              | orf19.2274  | 10300 | IPF10300   | No significant S.c. match                                                            |                                                       |
| CA1878 | 1.0 | 1.0 | 1.0 | 1.0 | 1.1 | 1.0 | IPF10298    | 7407778..7 unknown function                             | orf19.2272  | 10298 | IPF10298   | UNCLASSIFIED PROTEINS                                                                | transcription regulator activity                      |
| CA1879 | 1.0 | 1.0 | 1.1 | 1.0 | 1.0 | 1.1 | SMF12       | complemer manganese transporter (by homolo              | orf19.2270  | 19747 | CaSMF12    | PROTEIN FATE [folding modification destination]                                      | TRANSP transporter activity                           |
| CA1880 | 1.1 | 1.1 | 1.0 | 1.0 | 1.0 | 0.9 | IPF13316    | complemer unknown function                              | orf19.2269  | 13316 | IPF13316   | UNCLASSIFIED PROTEINS                                                                | molecular_function unknown                            |
| CA1881 | 1.0 | 1.0 | 0.9 | 1.0 | 1.1 | 1.0 | RCK2        | 7416783..7 Ca/calmodulin-dependent ser/thr              | orf19.9808  | 19933 | CaRCK2     | ENERGY CELL CYCLE AND DNA PROCESSING SUBCELLULAR LOC                                 | protein kinase activity                               |
| CA1882 | 1.0 | 1.0 | 1.0 | 0.9 | 1.1 | 1.0 | IPF19934    | complemer unknown function                              | orf19.9755  | 19934 | IPF19934   | No significant S.c. match                                                            |                                                       |
| CA1883 | 0.9 | 1.0 | 1.0 | 1.1 | 1.1 | 1.1 | IPF5479     | 7424011..7 unknown function                             | orf19.2209  | 5479  | IPF5479    | UNCLASSIFIED PROTEINS                                                                |                                                       |
| CA1884 | 1.1 | 1.1 | 1.0 | 1.1 | 1.1 | 1.1 | IPF5486     | 7427257..7 unknown function                             | orf19.2208  | 5486  | IPF5486    | No significant S.c. match                                                            |                                                       |
| CA1886 | 1.0 | 1.0 | 1.0 | 1.1 | 1.0 | 1.1 | RHO2.3F     | 7432655..7 GTP-binding protein of the RHO subfamily, 3- |             | 5490  | CaRHO2.3   | C-compound and carbohydrate metabolism CELLULAR COMMUNICATION/SIGNAL TRANSDUCTION ME |                                                       |
| CA1887 | 1.0 | 1.0 | 1.1 | 1.1 | 0.9 | 0.9 | IPF5496     | 7434209..7 unknown function                             | orf19.2204  | 5496  | IPF5496    | UNCLASSIFIED PROTEINS                                                                | molecular_function unknown                            |
| CA1888 | 1.0 | 1.0 | 0.9 | 1.0 | 0.9 | 0.9 | IPF18594    | complemer unknown function                              | orf19.9748  | 18594 | IPF18594   | C-compound and carbohydrate metabolism ENERGY                                        |                                                       |
| CA1889 | 1.0 | 1.0 | 1.0 | 0.9 | 0.9 | 0.9 | CBP6        | 7437555..7 Apo-cytochrome B pre-mRNA processing prot    |             | 18593 | CaCBP6     | TRANSCRIPTION PROTEIN SYNTHESIS SUBCELLULAR LOCALISAT                                | molecular_function unknown                            |
| CA1891 | 1.1 | 1.0 | 1.0 | 1.0 | 1.0 | 1.0 | IPF10196    | 7443681..7 unknown function                             | orf19.2752  | 10196 | IPF10196   | C-compound and carbohydrate metabolism TRANSCRIPTION SUBCELL                         | DNA binding,transcription regulato                    |
| CA1892 | 1.1 | 1.1 | 1.0 | 1.0 | 1.0 | 1.1 | IPF10197    | complemer Similarity to transcription                   | orf19.2753  | 10197 | IPF10197   | TRANSCRIPTION                                                                        |                                                       |
| CA1893 | 1.0 | 1.0 | 1.0 | 1.0 | 1.0 | 1.0 | TIM13       | 7452428..7 subunit of mitochondrial protein im          | orf19.2754  | 10200 | CaTIM13    | PROTEIN FATE [folding modification destination]                                      | transporter activity                                  |
| CA1894 | 1.1 | 1.1 | 1.0 | 1.0 | 1.0 | 1.0 | PRE7.EXON1  | 7453387..7 putative subunit of 20S proteasom            | orf19.2755  | 10202 | CaPRE7.e   | PROTEIN FATE [folding modification destination]                                      | "SUBCELLULAR LOC peptidase activity                   |
| CA1895 | 1.0 | 1.0 | 1.1 | 1.0 | 1.0 | 1.0 | PRE7.EXON2  | 7453894..7 subunit of 20S proteasome, exon 2 (by homol  |             | 12004 | CaPRE7.e   | PROTEIN FATE [folding modification destination]                                      | "SUBCELLULAR LOCALISATION                             |
| CA1896 | 0.9 | 0.9 | 1.0 | 1.0 | 1.0 | 0.9 | ERD2        | complemer ER lumen protein retaining recepto            | orf19.2756  | 12003 | CaERD2     | PROTEIN FATE [folding modification destination]                                      | "CELLULAR TRANSPORT AND TRANSPORT MECHAN              |
| CA1897 | 1.0 | 1.0 | 1.0 | 0.9 | 1.0 | 1.0 | IPF12002    | complemer unknown function                              | orf19.1027  | 12002 | IPF12002   | CELL CYCLE AND DNA PROCESSING SUBCELLULAR LOCALISATION                               |                                                       |
| CA1898 | 1.0 | 1.0 | 1.0 | 1.0 | 0.9 | 0.9 | IPF11998    | 7457401..7 unknown function                             | orf19.1027  | 11998 | IPF11998   | No significant S.c. match                                                            |                                                       |
| CA1899 | 1.0 | 0.9 | 1.0 | 1.0 | 1.0 | 1.0 | HDA1        | 7461699..7 Histone deacetylase (by homology or          | orf19.2606  | 15480 | CaHDA1     | CELL CYCLE AND DNA PROCESSING TRANSCRIPTION                                          | "PROTEIN I hydrolase activity                         |
| CA1900 | 1.1 | 1.0 | 1.0 | 1.0 | 1.0 | 1.0 | ARK1        | complemer actin regulating serine/threonine kio         | orf19.2605  | 14133 | CaARK1     | CELL CYCLE AND DNA PROCESSING SUBCELLULAR LOCALISATION                               |                                                       |
| CA1901 | 1.0 | 1.0 | 1.0 | 0.9 | 1.0 | 1.1 | IPF14135    | 7467022..7 unknown function                             | orf19.2604  | 14135 | IPF14135   | UNCLASSIFIED PROTEINS                                                                | molecular_function unknown                            |
| CA1902 | 1.0 | 1.0 | 1.0 | 1.0 | 1.0 | 1.0 | OPT1        | 7470380..7 oligopeptide transporter                     | orf19.2602  | 14139 | CaOPT1     | CELL FATE TRANSPORT FACILITATION                                                     | transporter activity                                  |
| CA1903 | 1.0 | 1.0 | 1.0 | 1.0 | 1.0 | 0.9 | IPF2754     | complemer unknown function                              |             | 2754  | IPF2754    | No significant S.c. match                                                            |                                                       |
| CA1904 | 1.0 | 1.0 | 1.0 | 0.9 | 1.0 | 1.0 | GRX5        | complemer Glutaredoxin                                  | orf19.1029  | 7275  | CaGRX5     | PROTEIN FATE [folding modification destination]                                      | """"CELL RESCUE DE oxidoreductase activity            |
| CA1905 | 1.0 | 1.0 | 1.0 | 1.1 | 0.9 | 1.0 | IPF7274     | 7478916..7 unknown function                             | orf19.2783  | 7274  | IPF7274    | CELL RESCUE DEFENSE AND VIRULENCE                                                    | "SUBCELLULAR LOCALISATION                             |
| CA1906 | 1.0 | 1.0 | 1.0 | 1.0 | 1.0 | 1.0 | IPF7271     | 7480500..7 unknown function                             | orf19.2784  | 7271  | IPF7271    | No significant S.c. match                                                            |                                                       |
| CA1907 | 0.9 | 1.1 | 0.9 | 0.9 | 1.1 | 1.2 | ATP7        | complemer F1F0-ATPase complex, FO D sub                 | orf19.2785  | 7270  | CaATP7     | ENERGY CELLULAR TRANSPORT AND TRANSPORT MECHANISMS                                   | structural molecule activity                          |
| CA1908 | 1.0 | 0.9 | 1.0 | 1.0 | 0.9 | 1.0 | APL3        | 7482636..7 AP-2 complex subunit, alpha-adap             | orf19.2786  | 7268  | CaAPL3     | PROTEIN FATE [folding modification destination]                                      | "CELLULAR TRANSP molecular_function unknown           |
| CA1909 | 0.9 | 1.0 | 0.9 | 1.0 | 1.0 | 1.0 | IPF20091    | 7487008..7 unknown function                             | orf19.1030  | 20091 | IPF20091   | CELL FATE                                                                            |                                                       |
| CA1910 | 1.0 | 0.9 | 1.0 | 1.0 | 1.0 | 0.9 | IPF7260     | complemer unknown function                              | orf19.1030  | 7260  | IPF7260    | UNCLASSIFIED PROTEINS                                                                | transferase activity                                  |
| CA1911 | 1.0 | 1.1 | 1.0 | 1.1 | 1.0 | 1.2 | SSE1        | 7500200..7 heat shock protein of HSP70 famil            | orf19.2435  | 13776 | CaSSE1     | CELL RESCUE DEFENSE AND VIRULENCE                                                    | "REGULATION OF/INTEI chaperone activity               |
| CA1912 | 0.9 | 1.0 | 1.0 | 1.2 | 1.1 | 1.1 | SKY1        | 7503972..7 SRPK1 like protein kinase (by hom            | orf19.2436  | 13772 | CaSKY1     | UNCLASSIFIED PROTEINS                                                                | protein kinase activity                               |
| CA1913 | 1.0 | 0.9 | 0.9 | 1.1 | 1.1 | 1.1 | ARC35       | 7506384..7 subunit of the Arp2/3 complex inv            | orf19.2437  | 16563 | CaARC35    | CELLULAR TRANSPORT AND TRANSPORT MECHANISMS SUBCELL                                  | structural molecule activity                          |
| CA1914 | 1.0 | 1.0 | 1.0 | 0.9 | 0.9 | 0.9 | IPF16564    | complemer putative mitochondrial ribosomal p            | orf19.2438  | 16564 | IPF16564   | PROTEIN SYNTHESIS                                                                    | molecular_function unknown                            |
| CA1915 | 1.1 | 1.1 | 0.9 | 0.9 | 1.0 | 0.9 | IPF16565    | 7508297..7 unknown function                             | orf19.2439  | 16565 | IPF16565   | Lipid fatty-acid and isoprenoid metabolism                                           | "SUBCELLULAR LOCALISATION TRANSPORT FACILITATION      |
| CA1916 | 1.1 | 1.1 | 1.0 | 1.0 | 1.0 | 1.0 | IPF16566.3  | 7509360..7 unknown function, 3-prime end                |             | 16566 | IPF16566.3 | No significant S.c. match                                                            | transporter activity,oxidoreductase                   |
| CA1917 | 0.9 | 1.0 | 1.0 | 1.0 | 1.0 | 1.0 | IPF7479.3F  | complemer unknown function, 3-prime end                 | orf19.2440  | 7479  | IPF7479.3f | UNCLASSIFIED PROTEINS                                                                |                                                       |
| CA1918 | 0.9 | 1.0 | 1.1 | 1.1 | 1.0 | 1.1 | IPF7479.5F  | complemer unknown function, 5-prime end                 | orf19.2441  | 7478  | IPF7479.5f | No significant S.c. match                                                            |                                                       |
| CA1919 | 1.0 | 1.0 | 1.0 | 0.9 | 1.0 | 0.9 | IPF7477     | 7512539..7 unknown function                             | orf19.2442  | 7477  | IPF7477    | No significant S.c. match                                                            |                                                       |
| CA1920 | 1.0 | 0.9 | 0.9 | 1.0 | 0.9 | 1.0 | IPF7476     | complemer similar to Saccharomyces cerevisi             | orf19.2443  | 7476  | IPF7476    | CELLULAR COMMUNICATION/SIGNAL TRANSDUCTION MECHANISM                                 | enzyme regulator activity                             |
| CA1921 | 1.0 | 0.9 | 1.0 | 1.1 | 1.0 | 1.1 | IPF7475     | complemer similar to Saccharomyces cerevisi             | orf19.2444  | 7475  | IPF7475    | CELLULAR TRANSPORT AND TRANSPORT MECHANISMS CONTRO                                   | molecular_function unknown                            |
| CA1922 | 0.9 | 0.9 | 0.9 | 0.8 | 0.9 | 0.9 | DIP52       | complemer Dicarboxylic amino acid permease              | orf19.2445  | 7474  | CaDIP52    | Amino acid metabolism SUBCELLULAR LOCALISATION TRANSPORT FACILITATION                |                                                       |
| CA1923 | 1.0 | 0.9 | 1.0 | 1.0 | 1.0 | 1.0 | IPF9130     | complemer unknown function                              | orf19.5539  | 9130  | IPF9130    | No significant S.c. match                                                            |                                                       |
| CA1924 | 1.0 | 0.8 | 1.0 | 1.0 | 1.1 | 1.0 | IPF9126     | 7531935..7 unknown function                             | orf19.5537  | 9126  | IPF9126    | CELL RESCUE DEFENSE AND VIRULENCE                                                    | "SUBCELLULAR LOCAL signal transducer activity         |
| CA1925 | 1.1 | 1.0 | 1.0 | 0.9 | 0.9 | 1.0 | IPF18587    | 7540351..7 putative methyltransferase (by hom           | orf19.8372  | 18587 | IPF18587   | CELL CYCLE AND DNA PROCESSING SUBCELLULAR LOCALISATION                               |                                                       |
| CA1926 | 1.0 | 0.9 | 1.0 | 1.1 | 1.1 | 1.1 | IPF13407    | complemer Unknown function                              | orf19.8373  | 13407 | IPF13407   | C-compound and carbohydrate metabolism                                               | "PROTEIN FATE [folding modification destination]"     |
| CA1927 | 1.1 | 1.1 | 1.1 | 1.1 | 1.1 | 1.2 | YBN5        | complemer Putative purine nucleotide-binding            | orf19.754   | 13405 | CaYBN5     | UNCLASSIFIED PROTEINS                                                                | molecular_function unknown                            |
| CA1928 | 1.0 | 1.0 | 1.1 | 1.1 | 1.0 | 1.0 | MRPL37      | 7545977..7 Mitochondrial ribosomal protein Yr           | orf19.755   | 13404 | CaMRPL37   | PROTEIN SYNTHESIS SUBCELLULAR LOCALISATION                                           | structural molecule activity                          |
| CA1929 | 0.9 | 1.0 | 1.0 | 0.9 | 1.0 | 0.9 | SAP7        | complemer secreted aspartyl proteinase 7                | orf19.8376  | 19935 | CaSAP7     | PROTEIN FATE [folding modification destination]                                      | "Other virulence attributes                           |
| CA1930 | 0.9 | 1.0 | 1.0 | 1.0 | 1.0 | 1.0 | IPF3906.3   | 7553342..7 unknown function, 3-prime end                | orf19.758   | 3906  | IPF3906.3  | UNCLASSIFIED PROTEINS                                                                | signal transducer activity                            |
| CA1931 | 1.0 | 1.0 | 0.9 | 1.0 | 1.0 | 1.0 | IPF3905     | complemer similar to Saccharomyces cerevisi             | orf19.759   | 3905  | IPF3905    | CELLULAR TRANSPORT AND TRANSPORT MECHANISMS SUBCELL                                  | molecular_function unknown                            |
| CA1932 | 1.0 | 1.1 | 1.0 | 0.8 | 1.0 | 1.0 | IPF3903     | 7557161..7 unknown function                             | orf19.760   | 3903  | IPF3903    | PROTEIN SYNTHESIS SUBCELLULAR LOCALISATION                                           | structural molecule activity                          |
| CA1933 | 1.1 | 1.0 | 0.9 | 1.0 | 1.0 | 1.0 | IPF18586    | complemer Unknown function                              | orf19.8381  | 18586 | IPF18586   | No significant S.c. match                                                            |                                                       |
| CA1934 | 1.0 | 1.0 | 1.0 | 1.0 | 0.9 | 1.0 | YAP1802.3EO | 7561674..7 cytoskeletal adaptor, member of AP180 protei |             | 8015  | CaYAP180   | PROTEIN FATE [folding modification destination]                                      | "CELLULAR TRANSPORT AND TRANSPORT MECHAN              |
| CA1935 | 1.1 | 1.0 | 1.0 | 1.1 | 1.0 | 1.0 | IPF19936    | complemer unknown function                              | orf19.4185  | 19936 | IPF19936   | UNCLASSIFIED PROTEINS                                                                | protein phosphatase activity                          |
| CA1936 | 1.0 | 1.0 | 1.0 | 1.0 | 1.0 | 0.9 | PCT1        | 7564083..7 cholinephosphate cytidyltransfer             | orf19.4186  | 8007  | CaPCT1     | Lipid fatty-acid and isoprenoid metabolism                                           | "SUBCELLULAR LOCALISA nucleotidyltransferase activity |
| CA1937 | 0.9 | 1.0 | 1.0 | 1.0 | 1.0 | 1.0 | MMM1        | 7565694..7 mitochondrial outer membrane pro             | orf19.4187  | 8006  | CaMMM1     | SUBCELLULAR LOCALISATION                                                             | molecular_function unknown                            |
| CA1938 | 1.0 | 1.0 | 1.0 | 1.1 | 1.0 | 1.1 | NMD5        | 7567805..7 putative Nam7p/Upf1p-interacting             | orf19.4188  | 8002  | CaNMD5     | Nucleotide metabolism                                                                | protein binding                                       |
| CA1939 | 1.0 | 0.9 | 1.0 | 1.0 | 1.0 | 0.9 | IPF8000     | 7572102..7 unknown function                             | orf19.4189  | 8000  | IPF8000    | No significant S.c. match                                                            |                                                       |
| CA1940 | 1.0 | 1.1 | 1.0 | 1.0 | 1.0 | 1.0 | IPF7999     | complemer unknown function                              | orf19.4190  | 7999  | IPF7999    | UNCLASSIFIED PROTEINS                                                                | molecular_function unknown                            |
| CA1941 | 1.0 | 1.1 | 1.1 | 0.9 | 1.0 | 1.0 | IPF7998     | 7574570..7 Ribosomal protein L24 (by homolo             | orf19.4191  | 7998  | IPF7998    | PROTEIN SYNTHESIS                                                                    | molecular_function unknown                            |
| CA1942 | 1.0 | 0.9 | 1.0 | 1.1 | 1.0 | 1.0 | HCT5.3EOC   | complemer #N/A                                          |             | 7996  | CaHCT5.3   | TRANSCRIPTION                                                                        |                                                       |
| CA1943 |     |     |     |     |     |     | IPF11759    | 7577262..7579019                                        |             |       |            |                                                                                      |                                                       |
| CA1944 | 1.0 | 1.0 | 1.0 | 1.0 | 1.0 | 1.0 | IPF10645    | 7579486..7 unknown function                             | orf19.4738  | 10645 | IPF10645   | UNCLASSIFIED PROTEINS                                                                | molecular_function unknown                            |
| CA1945 | 1.0 | 1.0 | 1.0 | 1.0 | 0.9 | 1.1 | MSS116      | complemer RNA helicase of the DEAD box far              | orf19.4739  | 10643 | CaMSS116   | TRANSCRIPTION SUBCELLULAR LOCALISATION                                               | RNA binding,helicase activity                         |

|        |     |     |     |     |     |     |              |                                                                     |                  |                                                                         |                                 |
|--------|-----|-----|-----|-----|-----|-----|--------------|---------------------------------------------------------------------|------------------|-------------------------------------------------------------------------|---------------------------------|
| CA1946 | 0.9 | 1.0 | 1.0 | 1.0 | 1.0 | 0.8 | IPF19937     | complemer putative peptidyl-tRNA hydrolases orf19.4740              | 19937 IPF19937   | PROTEIN SYNTHESIS                                                       | hydrolase activity              |
| CA1947 | 0.9 | 0.9 | 0.9 | 1.1 | 1.0 | 1.0 | IPF10637     | 7585182..7 starvation protein -like (by homolo                      | 10637 IPF10637   | SUBCELLULAR LOCALISATION                                                |                                 |
| CA1948 | 1.1 | 1.1 | 1.0 | 1.0 | 0.9 | 1.0 | IPF14022     | complemer ATPase family gene (by homology orf19.1220                | 14022 IPF14022   | CLASSIFICATION NOT YET CLEAR-CUT                                        |                                 |
| CA1949 | 1.0 | 1.1 | 1.0 | 1.0 | 1.0 | 0.9 | IPF14021     | complemer dual specificity phosphatase (PTP,orf19.1220              | 14021 IPF14021   | CLASSIFICATION NOT YET CLEAR-CUT                                        | hydrolase activity              |
| CA1950 | 1.3 | 1.2 | 1.0 | 1.0 | 1.0 | 1.0 | IPF14019     | complemer unknown function orf19.1220                               | 14019 IPF14019   | UNCLASSIFIED PROTEINS                                                   | molecular_function unknown      |
| CA1951 | 1.0 | 1.1 | 1.1 | 0.9 | 0.9 | 1.0 | HEM14        | 7593736..7 Mitochondrial protoporphyrinogen orf19.1220              | 19663 CaHEM14    | Metabolism of vitamins cofactors and prosthetic groups ""SUBCELLULAF    | oxidoreductase activity         |
| CA1952 | 1.0 | 1.0 | 1.0 | 1.0 | 1.0 | 1.1 | IFP1         | 7599449..7 Unknown function orf19.762                               | 3901 CaIFP1      | No significant S.c. match                                               |                                 |
| CA1953 | 1.0 | 1.0 | 1.0 | 0.9 | 1.0 | 1.0 | IPF3899      | complemer similar to Saccharomyces cerevisi orf19.763               | 3899 IPF3899     | CELL CYCLE AND DNA PROCESSING TRANSCRIPTION SUBCELLULRNA binding        |                                 |
| CA1954 | 1.0 | 0.9 | 1.0 | 1.0 | 0.9 | 0.8 | IPF3897.5F   | 7602644..7 unknown function, 5-prime end orf19.764                  | 18581 IPF3897.5f | UNCLASSIFIED PROTEINS                                                   | molecular_function unknown      |
| CA1955 | 1.0 | 1.0 | 1.1 | 1.0 | 1.0 | 1.1 | IPF3897.3F   | 7603593..7 unknown function, 3-prime end orf19.765                  | 3897 IPF3897.3f  | UNCLASSIFIED PROTEINS                                                   |                                 |
| CA1956 | 1.0 | 0.9 | 1.0 | 1.1 | 1.1 | 1.1 | ERG3         | 7606896..7 C5,6 desaturase C5,6 desat orf19.767                     | 3890 CaERG3      | Lipid fatty-acid and isoprenoid metabolism ""SUBCELLULAR LOCALISA'      | oxidoreductase activity         |
| CA1957 | 0.9 | 1.0 | 0.9 | 0.9 | 1.0 | 1.1 | IPF3887      | 7609190..7 similar to Saccharomyces cerevisi orf19.768              | 3887 IPF3887     | REGULATION OF/INTERACTION WITH CELLULAR ENVIRONMENT C                   | molecular_function unknown      |
| CA1958 | 0.9 | 1.0 | 1.1 | 1.1 | 0.9 | 1.1 | IFE1         | complemer Unknown function orf19.769                                | 3885 CaIFE1      | C-compound and carbohydrate metabolism ENERGY                           | oxidoreductase activity         |
| CA1959 | 0.9 | 1.0 | 1.0 | 1.1 | 1.0 | 1.0 | IFD2         | complemer putative oxidoreductase (by homol orf19.771               | 3883 CaIFD2      | C-compound and carbohydrate metabolism ENERGY                           | oxidoreductase activity         |
| CA1960 | 1.1 | 1.0 | 1.0 | 1.0 | 1.1 | 1.0 | IPF15232     | 7617490..7 unknown function orf19.2400                              | 15232 IPF15232   | UNCLASSIFIED PROTEINS                                                   | molecular_function unknown      |
| CA1961 | 0.9 | 0.9 | 1.0 | 1.0 | 1.1 | 1.0 | IPF14284     | complemer putative dnaJ-like protein (by hom orf19.2399             | 15229 IPF14284   | PROTEIN FATE [folding modification destination]                         | molecular_function unknown      |
| CA1962 | 0.9 | 0.9 | 0.9 | 0.9 | 1.0 | 0.8 | IPF14285     | complemer unknown function orf19.2398                               | 14285 IPF14285   | No significant S.c. match                                               |                                 |
| CA1963 | 1.0 | 1.1 | 0.9 | 1.0 | 1.0 | 1.0 | IPF14040     | 7627840..7 probable transporter (by homology orf19.2397             | 14040 IPF14040   | TRANSPORT FACILITATION                                                  |                                 |
| CA1964 | 1.0 | 1.0 | 1.0 | 1.1 | 1.1 | 1.1 | IFR2         | 7630467..7 unknown function orf19.2396                              | 14036 CaIFR2     | SUBCELLULAR LOCALISATION                                                |                                 |
| CA1965 | 1.1 | 1.1 | 1.0 | 1.0 | 1.0 | 1.0 | IPF14035     | complemer Similar to serine/threonine protein orf19.2395            | 14035 IPF14035   | CELL CYCLE AND DNA PROCESSING CELL FATE                                 | protein kinase activity         |
| CA1966 | 1.0 | 1.1 | 0.9 | 1.0 | 1.0 | 0.9 | IFR4         | complemer unknown function orf19.2394                               | 11494 CaiFR4     | SUBCELLULAR LOCALISATION                                                | oxidoreductase activity         |
| CA1967 | 1.0 | 1.0 | 1.2 | 1.1 | 1.0 | 1.0 | IPF10866     | 7638111..7 similar to Saccharomyces cerevisi orf19.5219             | 10866 IPF10866   | Nucleotide metabolism SUBCELLULAR LOCALISATION                          | enzyme regulator activity       |
| CA1968 | 0.9 | 1.0 | 1.0 | 0.9 | 1.0 | 1.0 | IPF10864     | complemer similar to Saccharomyces cerevisi orf19.5220              | 10864 IPF10864   | CELL CYCLE AND DNA PROCESSING                                           | hydrolase activity              |
| CA1969 | 1.0 | 1.0 | 1.0 | 1.0 | 1.0 | 1.0 | IPF18579.3F  | complemer unknown function, 3-prime end orf19.5221                  | 10863 IPF18579.3 | UNCLASSIFIED PROTEINS                                                   | molecular_function unknown      |
| CA1970 | 1.0 | 0.9 | 1.0 | 0.9 | 1.0 | 1.1 | IPF18579.5F  | complemer unknown function, 5-prime end orf19.5222                  | 18579 IPF18579.5 | No significant S.c. match                                               |                                 |
| CA1971 | 1.0 | 1.0 | 1.1 | 1.0 | 1.1 | 1.0 | PKH2         | 7651993..7 Ser/Thr protein kinase(by homolog orf19.5224             | 10418 CaPKH2     | UNCLASSIFIED PROTEINS                                                   | protein kinase activity         |
| CA1972 | 1.0 | 1.0 | 0.9 | 1.1 | 1.0 | 1.1 | RPL27A       | 7656496..7 ribosomal protein L27 ribosomal protein L27   orf19.5226 | 10412 CaRPL27A   | PROTEIN SYNTHESIS SUBCELLULAR LOCALISATION                              | structural molecule activity    |
| CA1973 | 1.0 | 1.0 | 1.1 | 1.1 | 1.0 | 1.0 | WRS1         | 7657314..7 tryptophan--tRNA ligase orf19.5226                       | 10411 CaWRS1     | PROTEIN SYNTHESIS SUBCELLULAR LOCALISATION                              | ligase activity                 |
| CA1974 | 1.0 | 1.1 | 1.1 | 1.1 | 1.0 | 1.0 | IPF10410     | complemer unknown function orf19.5227                               | 10410 IPF10410   | UNCLASSIFIED PROTEINS                                                   | molecular_function unknown      |
| CA1975 | 0.9 | 0.9 | 1.1 | 1.0 | 1.0 | 1.1 | PLB1         | complemer phospholipase B phospholip. orf19.689                     | 9584 CaPLB1      | Lipid fatty-acid and isoprenoid metabolism ""Other virulence attributes |                                 |
| CA1976 | 1.0 | 1.0 | 1.1 | 1.0 | 1.0 | 1.1 | IPF9582      | 7666057..7 similar to Saccharomyces cerevisi orf19.688              | 9582 IPF9582     | PROTEIN SYNTHESIS SUBCELLULAR LOCALISATION                              | structural molecule activity    |
| CA1977 | 1.0 | 0.9 | 0.8 | 0.7 | 0.9 | 0.9 | RPL25.3      | 7667499..7 ribosomal protein L23a, 3-prime end (by hom orf19.687    | 9581 CaRPL25.3   | PROTEIN SYNTHESIS SUBCELLULAR LOCALISATION                              | RNA binding                     |
| CA1978 | 0.9 | 1.0 | 1.0 | 1.0 | 1.0 | 1.0 | IPF9580      | complemer unknown function orf19.687                                | 9580 IPF9580     | No significant S.c. match                                               |                                 |
| CA1979 | 1.0 | 0.9 | 1.1 | 1.2 | 1.1 | 1.1 | IPF9577      | 7670060..7 unknown function orf19.686                               | 9577 IPF9577     | UNCLASSIFIED PROTEINS                                                   | molecular_function unknown      |
| CA1980 | 1.0 | 0.9 | 1.0 | 1.0 | 1.0 | 1.0 | YHM1         | complemer member of the mitochondrial carrier orf19.685             | 16978 CaYHM1     | CELLULAR TRANSPORT AND TRANSPORT MECHANISMS SUBCELL                     | transporter activity            |
| CA1981 | 1.0 | 1.0 | 1.2 | 1.1 | 1.1 | 1.1 | IPF9470      | 7674421..7 similar to Saccharomyces cerevisi orf19.684              | 9470 IPF9470     | TRANSCRIPTION SUBCELLULAR LOCALISATION                                  | protein binding                 |
| CA1982 | 1.1 | 1.1 | 1.0 | 0.9 | 1.0 | 1.0 | ADK1         | complemer adenylate kinase, cytosolic (by hor orf19.683             | 20093 CaADK1     | Nucleotide metabolism SUBCELLULAR LOCALISATION                          | transferase activity            |
| CA1983 | 1.0 | 1.0 | 1.0 | 1.0 | 1.2 | 1.2 | ILV5         | complemer ketol-acid reducto-isomerase (by horf19.7733              | 9595 CaILV5      | Amino acid metabolism SUBCELLULAR LOCALISATION                          | oxidoreductase activity         |
| CA1984 | 1.0 | 1.0 | 1.0 | 1.0 | 0.9 | 1.0 | IPF9592      | 7685772..7 unknown function orf19.7736                              | 9592 IPF9592     | UNCLASSIFIED PROTEINS                                                   |                                 |
| CA1985 | 1.1 | 1.0 | 1.0 | 0.9 | 1.0 | 1.0 | IPF9591      | complemer unknown function orf19.91                                 | 9591 IPF9591     | UNCLASSIFIED PROTEINS                                                   | molecular_function unknown      |
| CA1986 | 1.0 | 1.0 | 1.0 | 1.0 | 0.9 | 1.0 | IPF14899     | complemer unknown function orf19.92                                 | 14899 IPF14899   | UNCLASSIFIED PROTEINS                                                   | molecular_function unknown      |
| CA1987 | 1.0 | 1.2 | 0.8 | 0.7 | 0.9 | 0.8 | IPF14895     | 7693851..7 unknown function orf19.7739                              | 14895 IPF14895   | UNCLASSIFIED PROTEINS                                                   | molecular_function unknown      |
| CA1988 | 0.9 | 0.9 | 1.0 | 1.1 | 1.0 | 1.0 | IPF19749     | complemer unknown function orf19.94                                 | 19749 IPF19749   | No significant S.c. match                                               |                                 |
| CA1989 | 1.0 | 1.0 | 1.1 | 1.0 | 0.9 | 0.9 | IPF16596     | complemer unknown function orf19.95                                 | 16596 IPF16596   | No significant S.c. match                                               |                                 |
| CA1990 | 1.1 | 1.0 | 1.1 | 1.1 | 0.9 | 1.0 | TOP1         | complemer CANAL DNA TOPOISOMERASE orf19.7742                        | 17557 CaTOP1     | CELL CYCLE AND DNA PROCESSING TRANSCRIPTION SUBCELLUL                   | isomerase activity              |
| CA1991 | 1.0 | 0.9 | 1.1 | 1.0 | 1.0 | 1.0 | IPF6617.REP  | 7702053..7 unknown function, repeated protei orf19.1383             | 6619 IPF6617.re  | UNCLASSIFIED PROTEINS                                                   |                                 |
| CA1992 | 1.0 | 0.9 | 1.1 | 1.0 | 1.0 | 1.0 | IPF6617.REP  | 7703699..7 unknown function, repeated protei orf19.6484             | 6617 IPF6617.re  | No significant S.c. match                                               |                                 |
| CA1993 | 1.0 | 1.0 | 1.0 | 1.0 | 1.0 | 1.0 | IPF6614      | 7704943..7 unknown function orf19.6482                              | 6614 IPF6614     | PROTEIN SYNTHESIS SUBCELLULAR LOCALISATION                              |                                 |
| CA1994 | 0.9 | 1.0 | 0.9 | 1.1 | 1.1 | 1.1 | IPF6613      | 7705947..7 unknown function orf19.6481                              | 6613 IPF6613     | CLASSIFICATION NOT YET CLEAR-CUT                                        | peptidase activity              |
| CA1995 | 1.0 | 0.9 | 1.0 | 1.0 | 0.9 | 1.0 | IPF6612      | complemer unknown function orf19.6480                               | 6612 IPF6612     | UNCLASSIFIED PROTEINS                                                   | transporter activity            |
| CA1996 | 0.9 | 1.0 | 1.0 | 0.9 | 0.9 | 0.9 | SEC1         | 7710748..7 transport protein orf19.6479                             | 6609 CaSEC1      | CELLULAR TRANSPORT AND TRANSPORT MECHANISMS SUBCELL                     | protein binding                 |
| CA1997 | 1.1 | 1.0 | 1.0 | 1.0 | 1.1 | 1.1 | YCF1         | 7713550..7 Glutathione S-conjugate transport orf19.6478             | 6607 CaYCF1      | CELLULAR TRANSPORT AND TRANSPORT MECHANISMS ""CELL R                    | transporter activity            |
| CA1998 | 1.1 | 1.0 | 1.0 | 1.0 | 1.0 | 1.0 | IPF6605      | complemer unknown function orf19.6477                               | 6605 IPF6605     | UNCLASSIFIED PROTEINS                                                   | protein binding                 |
| CA1999 | 1.0 | 1.1 | 1.1 | 1.0 | 1.0 | 1.0 | IPF19513     | complemer unknown function orf19.1383                               | 19513 IPF19513   | UNCLASSIFIED PROTEINS                                                   | molecular_function unknown      |
| CA2000 | 1.0 | 1.0 | 1.0 | 1.0 | 1.0 | 0.9 | IPF11796     | 7724290..7 unknown function orf19.2791                              | 11796 IPF11796   | No significant S.c. match                                               |                                 |
| CA2001 | 0.9 | 0.8 | 1.0 | 1.1 | 1.1 | 1.1 | IPF17074     | 7729908..7 unknown function orf19.2792                              | 17074 IPF17074   | UNCLASSIFIED PROTEINS                                                   | molecular_function unknown      |
| CA2002 | 0.9 | 1.0 | 1.0 | 1.0 | 1.0 | 1.0 | IPF16470     | complemer unknown function orf19.2794                               | 16470 IPF16470   | UNCLASSIFIED PROTEINS                                                   | isomerase activity              |
| CA2003 | 1.0 | 1.0 | 1.0 | 1.0 | 1.0 | 1.0 | IPF16471     | 7734019..7 unknown function orf19.2795                              | 16471 IPF16471   | TRANSCRIPTION                                                           | RNA binding                     |
| CA2004 | 1.0 | 1.1 | 1.0 | 1.0 | 1.1 | 1.0 | POL12        | 7735550..7 DNA-directed DNA polymerase al orf19.2796                | 15718 CaPOL12    | CELL CYCLE AND DNA PROCESSING SUBCELLULAR LOCALISATIO                   | nucleotidy/transferase activity |
| CA2005 | 0.9 | 0.9 | 1.1 | 1.0 | 1.0 | 1.1 | IPF11802     | 7737793..7 unknown function orf19.2797                              | 11802 IPF11802   | UNCLASSIFIED PROTEINS                                                   |                                 |
| CA2006 | 0.9 | 1.0 | 1.0 | 1.0 | 1.0 | 1.1 | IPF11801     | 7739903..7 unknown function orf19.2798                              | 11801 IPF11801   | UNCLASSIFIED PROTEINS                                                   | helicase activity               |
| CA2007 | 0.9 | 1.0 | 1.1 | 1.0 | 1.0 | 1.0 | GPI8         | 7742136..7 essential for GPI anchor attachme orf19.2799             | 11799 CaGPI8     | Lipid fatty-acid and isoprenoid metabolism """"PROTEIN FATE [folding m  | hydrolase activity              |
| CA2008 | 1.0 | 1.1 | 1.0 | 1.1 | 1.0 | 1.0 | IPF1742.3F.E | 7744454..7 unknown function, 3-prime end orf19.3089                 | 1740 IPF1742.3f  | No significant S.c. match                                               |                                 |
| CA2009 | 1.1 | 1.1 | 1.0 | 1.0 | 1.0 | 1.0 | IPF1732      | 7747497..7 intramitochondrial protein sorting ( orf19.3089          | 1732 IPF1732     | PROTEIN FATE [folding modification destination] ""SUBCELLULAR LOC       | molecular_function unknown      |
| CA2010 | 1.0 | 1.0 | 1.0 | 1.0 | 1.0 | 1.0 | IPF1731      | 7748288..7 unknown function orf19.3088                              | 1731 IPF1731     | REGULATION OF/INTERACTION WITH CELLULAR ENVIRONMENT C                   | molecular_function unknown      |
| CA2011 | 1.0 | 0.9 | 0.9 | 0.9 | 1.1 | 1.1 | RPS31        | 7749911..7 Ubiquitin fusion protein orf19.3087                      | 1727 CaRPS31     | PROTEIN SYNTHESIS ""PROTEIN FATE [folding modification destinatic       | structural molecule activity    |
| CA2012 | 1.0 | 1.1 | 1.0 | 1.0 | 1.0 | 1.0 | SEC10        | 7750545..7 Required for exocytosis (by homol orf19.3086             | 1725 CaSEC10     | CELLULAR TRANSPORT AND TRANSPORT MECHANISMS SUBCELL                     | protein binding                 |
| CA2013 | 1.0 | 1.0 | 1.0 | 0.9 | 1.0 | 1.0 | CDC1         | complemer Cell division control protein (by hor orf19.3083          | 1720 CaCDC1      | CELL CYCLE AND DNA PROCESSING REGULATION OF/INTERACTIO                  | molecular_function unknown      |
| CA2014 | 0.9 | 0.9 | 1.0 | 1.0 | 1.0 | 1.0 | IPF1717      | complemer similar to Saccharomyces cerevisi orf19.1059              | 1717 IPF1717     | CELL CYCLE AND DNA PROCESSING SUBCELLULAR LOCALISATIO                   | protein kinase activity         |
| CA2015 | 0.9 | 0.9 | 1.0 | 1.0 | 1.0 | 1.0 | IPF3416      | 7762798..7 unknown function orf19.8468                              | 14806 IPF3416    | No significant S.c. match                                               |                                 |
| CA2016 | 1.1 | 0.9 | 1.0 | 0.9 | 0.9 | 1.0 | IPF3415      | 7764256..7 similar to Saccharomyces cerevisi orf19.8467             | 3415 IPF3415     | PROTEIN FATE [folding modification destination] ""SUBCELLULAR LOC       | peptidase activity              |
| CA2017 | 1.2 | 1.1 | 1.0 | 1.0 | 1.1 | 1.2 | IPF3414      | complemer putative serine/threonine protein k orf19.846             | 3414 IPF3414     | CLASSIFICATION NOT YET CLEAR-CUT                                        | protein kinase activity         |

|        |     |     |     |     |     |     |            |                                                           |                  |                                                                                        |                                      |
|--------|-----|-----|-----|-----|-----|-----|------------|-----------------------------------------------------------|------------------|----------------------------------------------------------------------------------------|--------------------------------------|
| CA2018 | 1.0 | 0.9 | 1.0 | 1.0 | 1.0 | 1.0 | STE11      | complemer ser/thr protein kinase of the MEKK orf19.844    | 3412 CaSTE11     | REGULATION OF/INTERACTION WITH CELLULAR ENVIRONMENT C                                  | protein kinase activity,signal trans |
| CA2019 | 1.0 | 1.0 | 1.0 | 1.0 | 1.1 | 1.1 | IPF3409    | complemer unknown function orf19.8463                     | 3409 IPF3409     | UNCLASSIFIED PROTEINS                                                                  | molecular_function unknown           |
| CA2020 | 0.9 | 1.0 | 1.1 | 1.1 | 1.1 | 0.9 | IPF16901   | complemer unknown function orf19.8462                     | 16901 IPF16901   | No significant S.c. match                                                              |                                      |
| CA2021 | 1.0 | 1.1 | 1.0 | 1.0 | 1.1 | 1.0 | IPF17283   | complemer unknown function orf19.4907                     | 17283 IPF17283   | UNCLASSIFIED PROTEINS                                                                  | molecular_function unknown           |
| CA2022 | 1.1 | 1.0 | 1.1 | 1.1 | 1.0 | 1.2 | CBK1       | complemer serine/threonine protein kinase (by orf19.4909  | 9611 CaCBK1      | CLASSIFICATION NOT YET CLEAR-CUT                                                       | protein kinase activity              |
| CA2023 | 1.1 | 1.2 | 0.9 | 0.8 | 1.2 | 1.1 | RPL42.3    | complemer ribosomal protein L36a, 3-prime end (by hom     | 9613 CaRPL42.3   | PROTEIN SYNTHESIS SUBCELLULAR LOCALISATION UNCLASSIFIED                                | structural molecule activity         |
| CA2024 | 1.0 | 1.0 | 1.0 | 1.0 | 1.0 | 1.0 | IPF9616    | complemer unknown function orf19.4910                     | 9616 IPF9616     | No significant S.c. match                                                              |                                      |
| CA2025 | 1.0 | 1.0 | 1.0 | 1.0 | 0.9 | 0.9 | IPF9618    | 7791388..7 unknown function orf19.4911                    | 9618 IPF9618     | No significant S.c. match                                                              |                                      |
| CA2026 | 1.1 | 1.1 | 1.0 | 0.9 | 0.9 | 1.0 | IPF9777    | 7796233..7 unknown function orf19.1096                    | 9777 IPF9777     | UNCLASSIFIED PROTEINS                                                                  | molecular_function unknown           |
| CA2027 | 1.0 | 1.0 | 1.0 | 1.0 | 1.1 | 1.0 | MCK1       | complemer ser/thr/tyr protein kinase (by homo orf19.1096  | 9776 CaMCK1      | CELL CYCLE AND DNA PROCESSING CELL FATE                                                | protein kinase activity              |
| CA2028 | 0.9 | 1.0 | 1.0 | 1.0 | 1.1 | 1.0 | IPF18561.3 | complemer unknown function, , 3-prime end orf19.1096      | 18561 IPF18561.3 | No significant S.c. match                                                              |                                      |
| CA2029 | 0.9 | 1.0 | 1.0 | 1.0 | 1.1 | 1.0 | SAR1.3     | 7804767..7 GTP-binding protein of the ARF fa orf19.1096   | 13117 CaSAR1.3   | CELLULAR TRANSPORT AND TRANSPORT MECHANISMS SUBCELL                                    | hydrolase activity                   |
| CA2030 | 1.0 | 1.1 | 1.1 | 1.0 | 1.0 | 1.1 | IPF13116   | 7806274..7 unknown function orf19.3463                    | 13116 IPF13116   | UNCLASSIFIED PROTEINS                                                                  | hydrolase activity                   |
| CA2031 | 1.1 | 1.0 | 1.0 | 1.0 | 1.1 | 1.1 | RPL10A     | complemer L10A ribosomal protein orf19.3465               | 13114 CaRPL10A   | PROTEIN SYNTHESIS SUBCELLULAR LOCALISATION                                             | structural molecule activity         |
| CA2032 | 1.0 | 1.0 | 1.0 | 1.0 | 1.0 | 1.0 | IPF13112   | 7809533..7 unknown function orf19.3466                    | 13112 IPF13112   | UNCLASSIFIED PROTEINS                                                                  |                                      |
| CA2033 | 1.0 | 1.0 | 0.9 | 1.1 | 1.0 | 1.0 | SEC27      | complemer coatomer complex beta chain (be orf19.1097      | 16985 CaSEC27    | CELLULAR TRANSPORT AND TRANSPORT MECHANISMS SUBCELL                                    | molecular_function unknown           |
| CA2034 | 1.1 | 1.1 | 0.9 | 1.0 | 1.0 | 1.0 | SGD1.3F    | complemer Involved in HOG pathway, 3-prime end (by ho     | 18558 CaSGD1.3   | REGULATION OF/INTERACTION WITH CELLULAR ENVIRONMENT                                    |                                      |
| CA2035 | 1.0 | 1.0 | 0.9 | 1.0 | 1.1 | 0.9 | SGD1.5F    | complemer Involved in HOG pathway, 5-prime orf19.1184     | 7574 CaSGD1.5    | REGULATION OF/INTERACTION WITH CELLULAR ENVIRONMENT                                    | molecular_function unknown           |
| CA2036 | 1.1 | 1.0 | 1.0 | 1.1 | 1.0 | 0.9 | MSP1       | 7823690..740 kDa putative membrane-spann orf19.4362       | 7571 CaMSP1      | PROTEIN FATE [folding modification destination] ""CELLULAR TRANSP                      | hydrolase activity                   |
| CA2037 | 1.0 | 1.0 | 1.2 | 1.0 | 1.0 | 1.0 | IFF3       | complemer unknown function orf19.1183                     | 20094 CaIFF3     | UNCLASSIFIED PROTEINS                                                                  |                                      |
| CA2038 | 0.9 | 1.0 | 1.0 | 1.0 | 1.0 | 1.0 | IPF17510   | complemer unknown function orf19.1183                     | 17510 IPF17510   | UNCLASSIFIED PROTEINS                                                                  | molecular_function unknown           |
| CA2039 | 1.0 | 1.0 | 1.1 | 1.0 | 1.1 | 0.9 | IPF12947   | 7830501..7 unknown function orf19.1183                    | 12947 IPF12947   | UNCLASSIFIED PROTEINS                                                                  | molecular_function unknown           |
| CA2040 | 1.1 | 1.1 | 1.0 | 1.0 | 1.1 | 0.9 | IPF12946   | complemer unknown function orf19.4356                     | 12946 IPF12946   | C-compound and carbohydrate metabolism TRANSPORT FACILITATIO                           | molecular_function unknown           |
| CA2041 | 0.9 | 1.0 | 1.0 | 1.1 | 1.1 | 1.0 | IPF12944   | 7836414..7 unknown function orf19.1044                    | 12944 IPF12944   | No significant S.c. match                                                              |                                      |
| CA2042 | 1.0 | 0.9 | 1.0 | 0.9 | 1.1 | 1.0 | IPF14219   | complemer probable membrane protein (by hcorf19.1044      | 14219 IPF14219   | UNCLASSIFIED PROTEINS                                                                  | molecular_function unknown           |
| CA2043 | 1.1 | 1.0 | 1.0 | 1.1 | 1.1 | 1.0 | GSL21      | complemer 1,3-beta-D-glucan synthase subun orf19.2929     | 10681 CaGSL21    | C-compound and carbohydrate metabolism SUBCELLULAR LOCALISAT                           | transferase activity                 |
| CA2044 | 1.0 | 1.0 | 1.0 | 1.0 | 1.1 | 1.0 | IPF10668   | complemer unknown function orf19.1044                     | 10668 IPF10668   | UNCLASSIFIED PROTEINS                                                                  | translation regulator activity       |
| CA2045 | 1.0 | 1.0 | 1.0 | 1.0 | 0.9 | 0.9 | IPF8107    | complemer unknown function orf19.1045                     | 10665 IPF8107    | UNCLASSIFIED PROTEINS                                                                  | molecular_function unknown           |
| CA2046 | 1.0 | 1.0 | 1.0 | 1.1 | 1.0 | 1.0 | IPF8108    | complemer unknown function orf19.1045                     | 8108 IPF8108     | UNCLASSIFIED PROTEINS                                                                  | molecular_function unknown           |
| CA2047 | 1.1 | 1.0 | 0.8 | 0.9 | 1.1 | 1.2 | RPL10      | 7856908..7 Ribosomal protein L10 (by homolo orf19.1045    | 8109 CaRPL10     | CELL CYCLE AND DNA PROCESSING PROTEIN SYNTHESIS ""PROT                                 | structural molecule activity         |
| CA2049 | 0.9 | 0.9 | 0.9 | 0.9 | 0.9 | 0.9 | IPF12982   | complemer unknown function orf19.1314                     | 12982 IPF12982   | No significant S.c. match                                                              |                                      |
| CA2050 | 1.0 | 1.0 | 1.1 | 1.1 | 1.0 | 1.0 | IPF11023   | complemer unknown function orf19.1314                     | 11023 IPF11023   | No significant S.c. match                                                              |                                      |
| CA2051 | 1.1 | 1.1 | 1.0 | 0.9 | 1.0 | 1.0 | PXP5       | complemer acyl-coenzyme A oxidase I precursor orf19.5723  | 11025 CaPXP5     | Lipid fatty-acid and isoprenoid metabolism ""ENERGY SUBCELLULAR LOCALISATION           |                                      |
| CA2052 | 1.0 | 1.0 | 1.0 | 1.0 | 0.9 | 1.0 | IPF11027   | 7867877..7 unknown function orf19.5722                    | 11027 IPF11027   | TRANSCRIPTION                                                                          | molecular_function unknown           |
| CA2053 | 0.9 | 1.0 | 0.9 | 0.9 | 0.9 | 1.0 | IPF11029   | complemer unknown function orf19.5720                     | 11029 IPF11029   | TRANSPORT FACILITATION                                                                 |                                      |
| CA2055 | 1.0 | 1.0 | 1.0 | 1.1 | 1.0 | 1.0 | SAP4       | 7877137..7 secreted aspartyl prote secreted as orf19.5716 | 8099 CaSAP4      | PROTEIN FATE [folding modification destination] ""Other virulence attributes           |                                      |
| CA2056 | 1.0 | 1.1 | 1.0 | 1.0 | 1.0 | 1.0 | URA5       | 7881609..7 Orotate phosphoribosyltransferase orf19.2555   | 7845 CaURA5      | Nucleotide metabolism                                                                  | transferase activity                 |
| CA2057 | 1.1 | 1.0 | 1.0 | 1.0 | 1.0 | 0.9 | SEC65      | complemer Recognition particle su Sec65 [Car orf19.2557   | 7847 CaSEC65     | PROTEIN FATE [folding modification destination] ""SUBCELLULAR LOC                      | molecular_function unknown           |
| CA2058 | 1.0 | 1.0 | 1.0 | 0.9 | 1.1 | 1.0 | IPF7848    | 7883632..7 unknown function orf19.2558                    | 7848 IPF7848     | No significant S.c. match                                                              |                                      |
| CA2059 | 1.1 | 1.0 | 0.9 | 1.1 | 1.0 | 1.0 | CDC4       | complemer CANAL CELL DIVISION CONTR orf19.2559            | 7849 CaCDC4      | CELL CYCLE AND DNA PROCESSING CELL FATE SUBCELLULAR LOC                                | protein binding                      |
| CA2060 | 1.1 | 1.1 | 1.0 | 1.0 | 1.1 | 1.1 | CDC61.3F   | complemer Cytosolic leucyl-tRNA synthetase, orf19.2560    | 7853 CaCDC61.3   | PROTEIN SYNTHESIS SUBCELLULAR LOCALISATION                                             |                                      |
| CA2061 | 1.0 | 1.0 | 1.0 | 1.0 | 1.0 | 1.0 | CDC61.5F   | complemer Cytosolic leucyl-tRNA :cytosolic le orf19.2562  | 7856 CaCDC61.5   | PROTEIN SYNTHESIS SUBCELLULAR LOCALISATION                                             | ligase activity                      |
| CA2062 | 1.1 | 1.0 | 1.0 | 1.0 | 0.9 | 0.9 | IPF7858    | complemer similar to Saccharomyces cerevisi orf19.2563    | 7858 IPF7858     | TRANSCRIPTION SUBCELLULAR LOCALISATION                                                 | RNA binding                          |
| CA2063 | 1.0 | 1.0 | 1.0 | 1.1 | 1.1 | 1.0 | IPF7859    | 7895146..7 unknown function orf19.2564                    | 7859 IPF7859     | No significant S.c. match                                                              |                                      |
| CA2064 | 1.2 | 1.1 | 1.0 | 0.9 | 0.9 | 1.0 | IPF13024   | complemer unknown function orf19.1016                     | 13024 IPF13024   | TRANSCRIPTION SUBCELLULAR LOCALISATION                                                 |                                      |
| CA2065 | 1.1 | 1.0 | 1.1 | 1.0 | 1.1 | 0.9 | QCR2       | 7905191..7 Ubiquinol--cytochrome-c reductase orf19.2644   | 6978 CaQCR2      | ENERGY ""PROTEIN FATE [folding modification destination] ""SUBCELL                     | transporter activity,oxidoreductase  |
| CA2066 | 1.0 | 1.0 | 0.9 | 1.0 | 1.0 | 0.9 | RPO26      | 7906716..7 DNA-directed RNA polymerase I, orf19.2643      | 6977 CaRPO26     | TRANSCRIPTION SUBCELLULAR LOCALISATION                                                 | nucleotidyltransferase activity      |
| CA2067 | 1.1 | 1.0 | 1.0 | 1.0 | 1.0 | 1.0 | IPF6976    | complemer unknown function orf19.2642                     | 6976 IPF6976     | CELL CYCLE AND DNA PROCESSING CELLULAR TRANSPORT AND TRANSPORT MECHANISMS CELL         |                                      |
| CA2068 | 1.0 | 1.0 | 0.9 | 0.9 | 1.0 | 1.0 | ARP1       | 7908123..7 centractin (by homology) orf19.2641            | 6975 CaARP1      | CELL CYCLE AND DNA PROCESSING CELLULAR TRANSPORT AND structural molecule activity      |                                      |
| CA2069 | 1.0 | 1.0 | 1.0 | 1.0 | 1.0 | 1.1 | FUR1       | complemer Uracil phosphoribosyltransferase (orf19.2640    | 6973 CaFUR1      | Nucleotide metabolism SUBCELLULAR LOCALISATION                                         | transferase activity                 |
| CA2070 | 1.6 | 1.1 | 0.9 | 1.0 | 1.0 | 1.0 | IPF6971.3  | complemer unknown function, 3-prime end orf19.2639        | 6972 IPF6971.3   | No significant S.c. match                                                              |                                      |
| CA2071 | 1.0 | 1.0 | 1.1 | 1.0 | 1.0 | 1.0 | IPF6971.53 | complemer unknown function, internal fragment orf19.2639  | 6971 IPF6971.53  | TRANSCRIPTION SUBCELLULAR LOCALISATION                                                 | RNA binding                          |
| CA2072 | 1.0 | 1.0 | 1.0 | 1.0 | 1.0 | 1.0 | IPF6970    | complemer unknown function orf19.1016                     | 6970 IPF6970     | PROTEIN SYNTHESIS SUBCELLULAR LOCALISATION                                             | structural molecule activity         |
| CA2073 | 1.1 | 1.0 | 1.0 | 1.0 | 0.9 | 0.9 | IPF6967    | 7915229..7 unknown function orf19.1016                    | 6967 IPF6967     | No significant S.c. match                                                              |                                      |
| CA2074 | 0.9 | 0.9 | 1.0 | 0.9 | 1.0 | 1.0 | IPF3733    | 7918556..7 unknown function orf19.5287                    | 3733 IPF3733     | C-compound and carbohydrate metabolism TRANSCRIPTION CELL FATE SUBCELLULAR LOCALISATIO |                                      |
| CA2075 | 0.5 | 0.3 | 0.7 | 0.6 | 0.8 | 0.2 | IFE2       | 7921959..7 Unknown function orf19.5288                    | 3735 CaIFE2      | C-compound and carbohydrate metabolism                                                 |                                      |
| CA2076 | 1.0 | 0.9 | 0.9 | 0.9 | 1.0 | 1.0 | ERO1       | 7930054..7 Required for protein disulfide bond orf19.4871 | 13354 CaERO1     | PROTEIN FATE [folding modification destination] ""SUBCELLULAR LOC                      | transporter activity                 |
| CA2077 | 1.0 | 1.0 | 1.0 | 1.0 | 0.9 | 1.0 | IPF13353   | 7932518..7 unknown function orf19.4872                    | 13353 IPF13353   | No significant S.c. match                                                              |                                      |
| CA2078 | 1.1 | 1.1 | 1.0 | 1.0 | 0.9 | 1.0 | IPF13352   | complemer unknown function orf19.4873                     | 13352 IPF13352   | No significant S.c. match                                                              |                                      |
| CA2079 | 1.0 | 1.0 | 1.0 | 1.1 | 1.0 | 1.0 | MNN3       | complemer Golgi alpha-1,2-mannosyltransfera orf19.4874    | 13350 CaMNN3     | CELL FATE                                                                              |                                      |
| CA2080 | 0.9 | 1.0 | 0.9 | 1.0 | 0.9 | 0.9 | IPF9693    | 7938813..7 unknown function orf19.4875                    | 9693 IPF9693     | UNCLASSIFIED PROTEINS                                                                  | molecular_function unknown           |
| CA2081 | 0.9 | 0.9 | 1.0 | 1.0 | 1.1 | 1.1 | IPF9699    | complemer unknown function orf19.4878                     | 9699 IPF9699     | UNCLASSIFIED PROTEINS                                                                  | molecular_function unknown           |
| CA2082 | 1.1 | 1.0 | 1.0 | 0.9 | 1.1 | 1.0 | NTF2       | complemer nuclear transport facto nuclear transport facto | 9700 CaNTF2      | CELLULAR TRANSPORT AND TRANSPORT MECHANISMS SUBCELL                                    | protein binding                      |
| CA2083 | 1.0 | 1.0 | 1.0 | 1.0 | 1.1 | 1.0 | IPF3384.5F | 7950724..7 similar to Saccharomyces cerevisi orf19.832    | 3384 IPF3384.5F  | Secondary metabolism                                                                   | transferase activity                 |
| CA2084 | 0.9 | 1.0 | 1.0 | 0.9 | 0.8 | 1.0 | IPF3384.3F | 7953392..7 similar to Saccharomyces cerevisi orf19.833    | 3385 IPF3384.3F  | Secondary metabolism                                                                   |                                      |
| CA2085 | 0.9 | 0.9 | 1.0 | 0.9 | 0.9 | 0.9 | IPF3388    | 7954273..7 unknown function orf19.834                     | 3388 IPF3388     | C-compound and carbohydrate metabolism                                                 |                                      |
| CA2086 | 0.9 | 1.1 | 1.0 | 1.1 | 1.0 | 0.9 | IPF3392    | 7957232..7 unknown function orf19.835                     | 3392 IPF3392     | UNCLASSIFIED PROTEINS                                                                  | molecular_function unknown           |
| CA2087 | 0.8 | 0.9 | 1.0 | 1.0 | 0.9 | 1.1 | IPF3393    | complemer unknown function orf19.836                      | 3393 IPF3393     | No significant S.c. match                                                              |                                      |
| CA2088 | 1.0 | 0.9 | 1.0 | 1.0 | 1.0 | 1.0 | IPF3394    | 7961096..7 unknown function orf19.837                     | 3394 IPF3394     | TRANSCRIPTION SUBCELLULAR LOCALISATION                                                 | RNA binding                          |
| CA2089 | 1.0 | 1.0 | 1.0 | 1.0 | 1.0 | 1.0 | GNA1       | complemer Acetyltransferase acetyltrans orf19.837         | 3395 CaGNA1      | CELL CYCLE AND DNA PROCESSING SUBCELLULAR LOCALISATIO                                  | transferase activity                 |
| CA2090 | 1.1 | 1.0 | 1.0 | 1.0 | 0.9 | 1.0 | IPF3398.3  | 7963718..7 unknown function, 3-prime end orf19.839        | 3398 IPF3398.3   | No significant S.c. match                                                              |                                      |
| CA2091 | 1.0 | 1.0 | 1.1 | 0.9 | 1.0 | 1.0 | IPF3401    | complemer unknown function orf19.839                      | 3401 IPF3401     | UNCLASSIFIED PROTEINS                                                                  | molecular_function unknown           |

|        |     |     |     |     |     |     |              |                                                                          |       |            |                                                                                                                           |
|--------|-----|-----|-----|-----|-----|-----|--------------|--------------------------------------------------------------------------|-------|------------|---------------------------------------------------------------------------------------------------------------------------|
| CA2092 | 1.1 | 1.0 | 0.9 | 1.1 | 0.9 | 1.1 | RPL21A.3     | 7968235..7 Ribosomal protein, 3-prime end (b orf19.840                   | 3404  | CaRPL21A   | PROTEIN SYNTHESIS SUBCELLULAR LOCALISATION UNCLASSIFIED structural molecule activity                                      |
| CA2093 | 1.0 | 0.9 | 0.9 | 1.1 | 0.9 | 1.1 | IPF3406      | 7969031..7 unknown function orf19.841                                    | 3406  | IPF3406    | CELL CYCLE AND DNA PROCESSING SUBCELLULAR LOCALISATION molecular_function unknown                                         |
| CA2094 | 1.0 | 1.1 | 1.0 | 1.1 | 0.9 | 0.9 | IPF11493     | complemer unknown function orf19.9929                                    | 11493 | IPF11493   | TRANSCRIPTION                                                                                                             |
| CA2095 | 1.0 | 1.1 | 1.0 | 1.0 | 1.0 | 1.0 | IPF11492     | complemer unknown function orf19.2392                                    | 11492 | IPF11492   | No significant S.c. match                                                                                                 |
| CA2096 | 1.0 | 1.0 | 1.1 | 1.0 | 0.8 | 1.0 | IPF11491     | 7975446..7 unknown function orf19.2391                                   | 11491 | IPF11491   | UNCLASSIFIED PROTEINS molecular_function unknown                                                                          |
| CA2097 | 1.0 | 1.1 | 1.0 | 1.0 | 1.0 | 1.0 | IPF11489     | complemer unknown function orf19.2389                                    | 11489 | IPF11489   | CELL CYCLE AND DNA PROCESSING SUBCELLULAR LOCALISATION molecular_function unknown                                         |
| CA2098 | 1.0 | 1.0 | 1.1 | 1.0 | 1.0 | 1.0 | IPF11487     | complemer unknown function orf19.2387                                    | 11487 | IPF11487   | UNCLASSIFIED PROTEINS molecular_function unknown                                                                          |
| CA2099 | 0.9 | 0.9 | 1.0 | 1.0 | 1.1 | 1.1 | IPF11484     | 7979812..7 unknown function orf19.2386                                   | 11484 | IPF11484   | UNCLASSIFIED PROTEINS RNA binding                                                                                         |
| CA2100 | 0.9 | 0.9 | 1.0 | 1.0 | 1.0 | 1.1 | KT112        | complemer involved in resistance to K.lactis orf19.2385                  | 9366  | CaKT112    | CELL RESCUE DEFENSE AND VIRULENCE enzyme regulator activity                                                               |
| CA2101 | 1.1 | 1.0 | 1.0 | 1.0 | 1.0 | 1.0 | IPF9364      | 7981669..7 unknown function orf19.2384                                   | 9364  | IPF9364    | UNCLASSIFIED PROTEINS hydrolase activity                                                                                  |
| CA2102 | 0.9 | 0.8 | 1.0 | 0.9 | 0.8 | 0.9 | IPF9363      | complemer similar to Saccharomyces cerevisi orf19.2383                   | 9363  | IPF9363    | CELL CYCLE AND DNA PROCESSING SUBCELLULAR LOCALISATION DNA binding                                                        |
| CA2103 | 1.0 | 0.9 | 1.0 | 1.0 | 1.0 | 1.0 | ISM1         | 7984853..7 isoleucyl-tRNA synthetase (by hon orf19.9918                  | 9361  | CaISM1     | PROTEIN SYNTHESIS SUBCELLULAR LOCALISATION ligase activity                                                                |
| CA2104 | 1.0 | 1.0 | 1.0 | 1.0 | 1.1 | 1.0 | IPF19939     | 7988103..7 unknown function orf19.9917                                   | 19939 | IPF19939   | No significant S.c. match                                                                                                 |
| CA2105 | 1.0 | 0.9 | 1.0 | 1.0 | 1.2 | 1.0 | IPF10711     | 7993256..7 unknown function orf19.3694                                   | 10711 | IPF10711   | UNCLASSIFIED PROTEINS                                                                                                     |
| CA2106 | 1.1 | 1.0 | 1.0 | 0.9 | 1.0 | 1.0 | IPF10714     | 7997299..7 similar to pH-regulated (PHR) prot orf19.3693                 | 10714 | IPF10714   | CONTROL OF CELLULAR ORGANIZATION molecular_function unknown                                                               |
| CA2107 | 1.1 | 1.0 | 1.1 | 0.9 | 0.9 | 1.0 | IPF10716     | complemer unknown function orf19.3691                                    | 10716 | IPF10716   | UNCLASSIFIED PROTEINS molecular_function unknown                                                                          |
| CA2108 | 1.1 | 1.1 | 1.1 | 1.4 | 0.9 | 1.1 | RPL26A.3     | 8001738..8 ribosomal protein, 3-prime end (by homology) orf19.3690       | 10719 | CaRPL26A   | PROTEIN SYNTHESIS SUBCELLULAR LOCALISATION RNA binding                                                                    |
| CA2109 | 1.1 | 1.1 | 1.1 | 1.1 | 1.0 | 1.0 | IPF13749.5F  | 8003001..8 unknown function, 5-prime end orf19.3690                      | 13749 | IPF13749.5 | C-compound and carbohydrate metabolism ENERGY molecular_function unknown                                                  |
| CA2110 | 1.2 | 1.2 | 1.0 | 0.9 | 1.0 | 1.0 | IPF13749.3F  | 8004053..8 unknown function, 3-prime end orf19.3689                      | 18544 | IPF13749.3 | C-compound and carbohydrate metabolism ENERGY                                                                             |
| CA2111 | 1.1 | 1.1 | 1.1 | 1.0 | 1.1 | 1.1 | IPF13748     | 8004941..8 Unknown function orf19.3688                                   | 13748 | IPF13748   | UNCLASSIFIED PROTEINS molecular_function unknown                                                                          |
| CA2112 | 0.9 | 1.0 | 1.0 | 1.1 | 1.0 | 1.0 | PFD1         | complemer Prefoldin subunit 1 (by homology) orf19.3687                   | 13747 | CaPFD1     | PROTEIN FATE [folding modification destination] chaperone activity                                                        |
| CA2113 | 1.0 | 1.1 | 1.0 | 1.0 | 0.8 | 0.9 | ATP12        | 8005890..8 F1FO-ATPase complex assembly orf19.3686                       | 13746 | CaATP12    | PROTEIN FATE [folding modification destination] ""SUBCELLULAR LOCALISATION chaperone activity                             |
| CA2114 | 0.9 | 1.0 | 1.0 | 1.1 | 1.0 | 1.0 | IPF13744     | 8007912..8 protein involved in regulation of ca orf19.3685               | 13744 | IPF13744   | C-compound and carbohydrate metabolism molecular_function unknown                                                         |
| CA2115 | 1.1 | 1.0 | 0.9 | 0.9 | 1.0 | 1.0 | IPF8030      | 8014628..8 unknown function orf19.8911                                   | 8030  | IPF8030    | CELL CYCLE AND DNA PROCESSING molecular_function unknown                                                                  |
| CA2116 | 1.0 | 1.0 | 1.0 | 0.9 | 0.9 | 1.0 | SNG4         | complemer Drug transporter (by homology) orf19.1332                      | 8028  | CaSNG4     | CELL RESCUE DEFENSE AND VIRULENCE                                                                                         |
| CA2117 | 1.0 | 1.1 | 1.0 | 0.9 | 1.1 | 1.0 | SNG3         | 8018926..8 Drug transporter (by homology) orf19.1333                     | 8025  | CaSNG3     | CELL RESCUE DEFENSE AND VIRULENCE ""TRANSPORT FACILITATION                                                                |
| CA2118 | 1.0 | 0.9 | 1.1 | 1.0 | 0.8 | 1.0 | IPF8024      | 8023334..8 unknown function orf19.1334                                   | 8024  | IPF8024    | No significant S.c. match                                                                                                 |
| CA2119 | 1.0 | 1.0 | 0.9 | 0.9 | 1.0 | 1.0 | MTR4         | 8025570..8 RNA Helicase (by homology) orf19.8915                         | 8020  | CaMTR4     | TRANSCRIPTION CELLULAR TRANSPORT AND TRANSPORT MECH.RNA binding,helicase activity                                         |
| CA2120 | 1.0 | 1.0 | 1.0 | 1.0 | 1.1 | 1.0 | PUP3         | 8029039..8 PRCT yeast proteasome component (by hom orf19.8918            | 8017  | CaPUP3     | PROTEIN FATE [folding modification destination] ""SUBCELLULAR LOCALISATION peptidase activity                             |
| CA2121 | 1.0 | 1.0 | 1.0 | 1.1 | 1.0 | 1.0 | IPF7930      | 8030927..8 unknown function orf19.8918                                   | 7930  | IPF7930    | UNCLASSIFIED PROTEINS molecular_function unknown                                                                          |
| CA2122 | 1.0 | 1.1 | 1.1 | 1.2 | 1.0 | 1.1 | CPY1.3F      | complemer Carboxypeptidase Y precursor, 3-prime end orf19.8919           | 18540 | CaCPY1.3   | PROTEIN FATE [folding modification destination] ""SUBCELLULAR LOCALISATION                                                |
| CA2124 | 1.0 | 1.0 | 1.0 | 1.1 | 1.1 | 1.1 | IPF10490     | complemer unknown function orf19.8049                                    | 10490 | IPF10490   | No significant S.c. match                                                                                                 |
| CA2125 | 1.0 | 1.0 | 1.0 | 1.0 | 1.1 | 1.0 | IPF4893      | 8040201..8 unknown function orf19.418                                    | 4893  | IPF4893    | UNCLASSIFIED PROTEINS protein binding                                                                                     |
| CA2126 | 1.0 | 0.8 | 1.0 | 1.0 | 1.0 | 1.0 | IPF4896      | 8045299..8 unknown function orf19.417                                    | 4896  | IPF4896    | CELLULAR TRANSPORT AND TRANSPORT MECHANISMS transporter activity                                                          |
| CA2127 | 0.9 | 0.9 | 1.0 | 1.0 | 1.0 | 1.0 | IPF4897      | complemer unknown function orf19.416                                     | 4897  | IPF4897    | No significant S.c. match                                                                                                 |
| CA2128 | 1.0 | 1.0 | 1.0 | 0.9 | 0.9 | 1.0 | IPF4898      | complemer unknown function orf19.415                                     | 4898  | IPF4898    | UNCLASSIFIED PROTEINS molecular_function unknown                                                                          |
| CA2129 | 1.2 | 1.1 | 1.0 | 1.0 | 1.0 | 1.0 | IPF4899      | 8048921..8 unknown function orf19.414                                    | 4899  | IPF4899    | UNCLASSIFIED PROTEINS structural molecule activity                                                                        |
| CA2130 | 0.9 | 1.0 | 1.0 | 1.0 | 1.0 | 1.0 | RPS27A       | complemer ribosomal protein S27.e (by homology) orf19.5211               | 4901  | CaRPS27A   | PROTEIN SYNTHESIS SUBCELLULAR LOCALISATION                                                                                |
| CA2131 | 1.0 | 1.0 | 1.0 | 1.0 | 0.9 | 1.0 | IDP1         | complemer isocitrate dehydrogenase, cytosolic orf19.5211                 | 5863  | CaIDP1     | C-compound and carbohydrate metabolism ENERGY SUBCELLULAR LOCALISATION                                                    |
| CA2132 | 1.0 | 0.9 | 1.0 | 1.1 | 1.0 | 0.9 | IPF5865      | 8057765..8 unknown function orf19.5212                                   | 5865  | IPF5865    | CELL CYCLE AND DNA PROCESSING DNA binding                                                                                 |
| CA2133 | 0.9 | 1.0 | 1.1 | 1.1 | 1.1 | 1.1 | IPF5866      | 8059498..8 unknown function orf19.5213                                   | 5866  | IPF5866    | TRANSCRIPTION SUBCELLULAR LOCALISATION                                                                                    |
| CA2134 | 1.0 | 1.2 | 0.8 | 0.7 | 1.0 | 0.9 | COX8         | complemer CYTOCHROME C OXIDASE (by homology) orf19.5213                  | 5867  | CaCOX8     | ENERGY SUBCELLULAR LOCALISATION oxidoreductase activity                                                                   |
| CA2135 | 1.0 | 1.0 | 0.8 | 1.1 | 1.0 | 0.9 | COX9         | 8062863..8 CYTOCHROME C OXIDASE (by homology) orf19.5214                 | 5868  | CaCOX9     | ENERGY ""PROTEIN FATE [folding modification destination] ""SUBCELLULAR LOCALISATION oxidoreductase activity               |
| CA2136 | 1.1 | 1.0 | 1.0 | 1.0 | 0.9 | 0.9 | VPS33        | complemer VACUOLAR PROTEIN SORTING orf19.5214                            | 5870  | CaVPS33    | PROTEIN FATE [folding modification destination] ""CELLULAR TRANSPORT AND TRANSPORT MECHANISM                              |
| CA2137 | 1.0 | 1.1 | 0.9 | 1.0 | 1.0 | 1.0 | ARP9         | 8076550..8 actin-related protein (by homology) orf19.2507                | 15652 | CaARP9     | SUBCELLULAR LOCALISATION transcription regulator activity                                                                 |
| CA2139 | 1.1 | 1.0 | 1.0 | 1.0 | 1.0 | 1.0 | IPF15654.EXC | complemer unknown function, exon 1 orf19.2509                            | 15654 | IPF15654.ε | No significant S.c. match                                                                                                 |
| CA2140 | 1.2 | 1.2 | 1.0 | 1.1 | 1.0 | 1.0 | IPF19665     | complemer unknown function orf19.1004i                                   | 19665 | IPF19665   | CELL CYCLE AND DNA PROCESSING SUBCELLULAR LOCALISATION chaperone activity                                                 |
| CA2141 | 1.1 | 1.2 | 1.0 | 1.0 | 1.1 | 1.0 | IPF19664     | complemer unknown function orf19.1004i                                   | 19664 | IPF19664   | CELL CYCLE AND DNA PROCESSING SUBCELLULAR LOCALISATION                                                                    |
| CA2142 | 1.0 | 1.0 | 1.0 | 1.0 | 1.0 | 1.0 | MRPL33       | 8084879..8 ribosomal protein of the large subunit, mitochond orf19.1004i | 15872 | CaMRPL33   | PROTEIN SYNTHESIS SUBCELLULAR LOCALISATION structural molecule activity                                                   |
| CA2143 | 1.0 | 0.9 | 1.1 | 1.0 | 0.9 | 1.0 | IPF12803     | 8087503..8 unknown function orf19.1004i                                  | 12803 | IPF12803   | No significant S.c. match                                                                                                 |
| CA2144 | 1.0 | 0.9 | 1.0 | 0.9 | 1.0 | 1.1 | IPF12802     | complemer unknown function orf19.2513                                    | 12802 | IPF12802   | PROTEIN FATE [folding modification destination] ""SUBCELLULAR LOCALISATION                                                |
| CA2145 | 0.9 | 0.9 | 0.9 | 1.1 | 1.0 | 1.0 | IPF12800     | 8090630..8 unknown function orf19.2514                                   | 12800 | IPF12800   | PROTEIN FATE [folding modification destination]                                                                           |
| CA2146 | 1.2 | 1.3 | 1.1 | 1.2 | 1.1 | 1.1 | IPF12799     | complemer unknown function orf19.2515                                    | 12799 | IPF12799   | No significant S.c. match                                                                                                 |
| CA2147 | 1.0 | 1.0 | 1.0 | 1.0 | 1.0 | 1.1 | IPF18533     | 8095958..8 unknown function orf19.2516                                   | 18533 | IPF18533   | Lipid fatty-acid and isoprenoid metabolism """"PROTEIN FATE [folding modification destination] ""SUBCELLULAR LOCALISATION |
| CA2148 | 1.0 | 1.0 | 1.0 | 1.0 | 1.0 | 1.0 | AUT1         | complemer similar to Saccharomyces cerevisi orf19.6020                   | 10762 | CaAUT1     | PROTEIN FATE [folding modification destination] ""CELLULAR TRANSPORT AND TRANSPORT MECHANISM molecular_function unknown   |
| CA2149 | 1.0 | 1.1 | 1.1 | 1.0 | 1.0 | 1.0 | IPF10761     | complemer unknown function orf19.6021                                    | 10761 | IPF10761   | No significant S.c. match                                                                                                 |
| CA2150 | 1.0 | 1.0 | 1.0 | 1.0 | 1.0 | 0.9 | IPF19940     | 8108317..8 unknown function orf19.6022                                   | 19940 | IPF19940   | No significant S.c. match                                                                                                 |
| CA2151 | 0.9 | 1.0 | 1.0 | 1.0 | 1.0 | 0.9 | ERC2         | complemer ethionine resistance protein (by homology) orf19.6023          | 7898  | CaERC2     | UNCLASSIFIED PROTEINS                                                                                                     |
| CA2152 | 1.0 | 1.0 | 1.0 | 1.0 | 1.0 | 1.0 | IPF7899      | complemer unknown function orf19.6024                                    | 7899  | IPF7899    | No significant S.c. match                                                                                                 |
| CA2153 | 1.0 | 1.0 | 1.0 | 1.0 | 1.0 | 1.0 | IPF7900      | complemer unknown function orf19.6025                                    | 7900  | IPF7900    | UNCLASSIFIED PROTEINS molecular_function unknown                                                                          |
| CA2154 | 1.0 | 1.0 | 1.0 | 1.0 | 1.0 | 1.0 | ERG2         | 8115702..8 C-8 sterol isomerase orf19.6026                               | 7901  | CaERG2     | Lipid fatty-acid and isoprenoid metabolism ""SUBCELLULAR LOCALISATION isomerase activity                                  |
| CA2155 | 1.0 | 1.0 | 1.0 | 1.0 | 1.0 | 0.9 | IPF7903      | complemer unknown function orf19.6027                                    | 7903  | IPF7903    | CELL CYCLE AND DNA PROCESSING CELL FATE SUBCELLULAR LOCALISATION structural molecule activity                             |
| CA2156 | 0.9 | 0.9 | 0.9 | 1.0 | 0.9 | 1.0 | IPF8535      | complemer unknown function orf19.5302                                    | 8535  | IPF8535    | No significant S.c. match                                                                                                 |
| CA2157 | 1.0 | 1.0 | 1.0 | 1.0 | 0.9 | 1.1 | IPF8537      | complemer similar to Saccharomyces cerevisi orf19.5300                   | 8537  | IPF8537    | SUBCELLULAR LOCALISATION molecular_function unknown                                                                       |
| CA2158 | 0.9 | 1.0 | 1.0 | 1.1 | 1.1 | 1.1 | ECM1         | complemer involved in cell wall biosynthesis (torf19.5299                | 8538  | CaECM1     | CONTROL OF CELLULAR ORGANIZATION                                                                                          |
| CA2159 | 0.9 | 1.0 | 1.0 | 1.1 | 1.0 | 1.0 | IPF19753     | complemer similar to Saccharomyces cerevisi orf19.5297                   | 19753 | IPF19753   | CELL CYCLE AND DNA PROCESSING TRANSCRIPTION SUBCELLULAR LOCALISATION transcription regulator activity                     |
| CA2160 | 1.0 | 1.0 | 1.0 | 1.0 | 1.0 | 1.0 | IPF15664     | 8131953..8 unknown function orf19.5296                                   | 15664 | IPF15664   | UNCLASSIFIED PROTEINS molecular_function unknown                                                                          |
| CA2161 | 1.0 | 1.0 | 1.1 | 1.0 | 0.9 | 0.9 | IPF11876     | 8133201..8 unknown function orf19.5295                                   | 11876 | IPF11876   | No significant S.c. match                                                                                                 |
| CA2162 | 1.1 | 1.1 | 1.1 | 1.0 | 1.3 | 1.3 | PDB1         | complemer pyruvate dehydrogenase (by homology) orf19.5294                | 11877 | CaPDB1     | C-compound and carbohydrate metabolism ENERGY SUBCELLULAR LOCALISATION oxidoreductase activity                            |
| CA2163 | 1.0 | 1.0 | 1.0 | 1.1 | 1.1 | 1.2 | IPF11879     | 8137348..8 unknown function orf19.5293                                   | 11879 | IPF11879   | No significant S.c. match                                                                                                 |
| CA2164 | 1.1 | 1.1 | 1.1 | 1.0 | 1.2 | 1.2 | AXL2         | complemer similar to saccharomyces cerevisi orf19.5292                   | 11881 | CaAXL2     | CELL FATE SUBCELLULAR LOCALISATION molecular_function unknown                                                             |
| CA2165 | 1.0 | 1.0 | 1.0 | 1.0 | 1.0 | 1.1 | IPF17024     | complemer unknown function orf19.5291                                    | 17024 | IPF17024   | Lipid fatty-acid and isoprenoid metabolism molecular_function unknown                                                     |

|        |     |     |     |     |     |     |             |                                                          |            |       |              |                                                 |                                                   |                                                     |
|--------|-----|-----|-----|-----|-----|-----|-------------|----------------------------------------------------------|------------|-------|--------------|-------------------------------------------------|---------------------------------------------------|-----------------------------------------------------|
| CA2166 | 1.0 | 0.9 | 1.0 | 0.9 | 1.0 | 1.0 | FEN12       | 8148907..8 Probable subunit of 1,3-beta-glucanase        | orf19.908  | 4547  | CaFEN12      | C-compound and carbohydrate metabolism          | ""Lipid fatty-acid and isoprenoid metabolism      | ""CELL FATE SUBCELLULAR LOCALISATION                |
| CA2167 | 0.9 | 0.9 | 1.1 | 1.1 | 0.9 | 1.1 | IPF4553     | 8153414..8 unknown function                              | orf19.909  | 4553  | IPF4553      | Amino acid metabolism                           | TRANSCRIPTION                                     | molecular_function unknown                          |
| CA2168 | 0.9 | 1.0 | 1.0 | 1.0 | 0.9 | 0.9 | IPF4558     | complemer similar to Saccharomyces cerevisiae            | orf19.910  | 4558  | IPF4558      | TRANSCRIPTION                                   | ""PROTEIN FATE [folding modification destination] | ""RNA binding                                       |
| CA2169 | 1.0 | 1.1 | 1.1 | 1.2 | 1.1 | 1.1 | IPF4563.5F  | 8159313..8 similar to saccharomyces cerevisiae           | orf19.911  | 4563  | IPF4563.5F   | CELL CYCLE AND DNA PROCESSING                   |                                                   |                                                     |
| CA2170 | 1.1 | 1.1 | 1.0 | 1.1 | 1.1 | 1.0 | IPF4563.3F  | 8164556..8 similar to saccharomyces cerevisiae           | orf19.912  | 18528 | IPF4563.3F   | CELL CYCLE AND DNA PROCESSING                   |                                                   |                                                     |
| CA2171 | 1.1 | 1.1 | 1.0 | 1.2 | 1.0 | 1.0 | PEP1.3      | 8166543..8 Vacuolar protein sorting/targeting            | orf19.3767 | 15204 | CaPEP1.3     | PROTEIN FATE [folding modification destination] | ""CELLULAR TRANSPORT AND TRANSPORT MECHANISMS     |                                                     |
| CA2172 | 1.1 | 1.0 | 1.0 | 1.0 | 1.0 | 1.0 | IPF15377    | 8173047..8 probable membrane protein involved in         | orf19.3765 | 15377 | IPF15377     | UNCLASSIFIED PROTEINS                           | molecular_function unknown                        |                                                     |
| CA2173 | 1.0 | 0.9 | 1.0 | 1.0 | 1.0 | 0.9 | IPF18527    | 8177798..8 unknown function                              | orf19.3764 | 18527 | IPF18527     | CELL CYCLE AND DNA PROCESSING                   | CELLULAR TRANSPORT AND                            | molecular_function unknown                          |
| CA2174 | 1.0 | 1.0 | 1.0 | 0.9 | 1.0 | 1.0 | IPF20096    | complemer unknown function                               | orf19.3763 | 20096 | IPF20096     | No significant S.c. match                       |                                                   |                                                     |
| CA2175 | 1.1 | 1.1 | 1.0 | 1.0 | 1.0 | 1.0 | IPF8892     | 8181927..8 unknown function                              | orf19.3762 | 8892  | IPF8892      | No significant S.c. match                       |                                                   |                                                     |
| CA2176 | 1.1 | 1.1 | 1.0 | 1.0 | 1.0 | 1.0 | CDC54       | complemer cell division control protein (by homology)    | orf19.1124 | 8893  | CaCDC54      | CELL CYCLE AND DNA PROCESSING                   | SUBCELLULAR LOCALISATION                          | DNA binding                                         |
| CA2177 | 1.0 | 0.9 | 1.0 | 1.0 | 1.1 | 1.0 | ROD1        | complemer O-dinitrobenzene, calcium and zinc             | orf19.9084 | 19576 | CaROD1       | CELL RESCUE DEFENSE AND VIRULENCE               |                                                   | molecular_function unknown                          |
| CA2178 | 1.1 | 1.0 | 1.0 | 1.1 | 0.9 | 0.9 | IPF9282     | complemer unknown function                               | orf19.1510 | 9282  | IPF9282      | UNCLASSIFIED PROTEINS                           |                                                   | molecular_function unknown                          |
| CA2179 | 1.0 | 0.9 | 1.0 | 1.0 | 1.1 | 1.0 | FAB1        | complemer phosphatidylinositol 3- $\gamma$ -phosphatidyl | orf19.9088 | 9288  | CaFAB1       | Lipid fatty-acid and isoprenoid metabolism      | ""PROTEIN FATE [folding modification destination] | molecular_function unknown                          |
| CA2180 |     |     |     |     |     |     | IPF9290     | 8207665..8208687                                         |            |       |              |                                                 |                                                   |                                                     |
| CA2181 | 1.0 | 1.0 | 1.0 | 1.0 | 1.1 | 1.0 | ECM331      | 8218869..8 involved in cell wall biogenesis              | orf19.4255 | 6869  | CaECM331     | CELL CYCLE AND DNA PROCESSING                   | CELL FATE                                         | molecular_function unknown                          |
| CA2182 | 0.9 | 1.1 | 1.0 | 1.0 | 1.0 | 1.0 | IPF6871     | complemer unknown function                               | orf19.4253 | 6871  | IPF6871      | Nucleotide metabolism                           | SUBCELLULAR LOCALISATION                          |                                                     |
| CA2183 | 1.1 | 1.2 | 1.0 | 1.0 | 1.1 | 1.0 | IPF6872     | 8223014..8 serine/threonine protein kinase (by homology) | orf19.4252 | 6872  | IPF6872      | CLASSIFICATION NOT YET CLEAR-CUT                |                                                   | protein kinase activity                             |
| CA2184 | 1.0 | 1.1 | 1.0 | 1.0 | 0.9 | 0.9 | IPF6874.3   | complemer unknown function, 3-prime end                  | orf19.4251 | 6874  | IPF6874.3    | No significant S.c. match                       |                                                   |                                                     |
| CA2185 | 1.2 | 1.1 | 1.0 | 1.1 | 1.0 | 1.1 | IPF6880     | 8228949..8 unknown function                              | orf19.4247 | 6880  | IPF6880      | No significant S.c. match                       |                                                   |                                                     |
| CA2186 | 1.0 | 1.0 | 0.9 | 0.7 | 1.0 | 1.0 | IPF6881     | complemer putative phosphatidyl synthase                 | orf19.4246 | 6881  | IPF6881      | UNCLASSIFIED PROTEINS                           |                                                   |                                                     |
| CA2187 | 1.1 | 1.0 | 1.0 | 1.0 | 1.1 | 1.0 | IPF11667    | 8241456..8 unknown function                              | orf19.4771 | 11667 | IPF11667     | PROTEIN FATE [folding modification destination] |                                                   |                                                     |
| CA2188 | 1.1 | 1.0 | 1.0 | 1.0 | 1.1 | 1.1 | SSU81       | complemer protein involved in the SHO1 pathway           | orf19.4772 | 19612 | CaSSU81      | CELL RESCUE DEFENSE AND VIRULENCE               | ""REGULATION OF/INTEGRIN                          | signal transducer activity                          |
| CA2189 | 0.9 | 0.3 | 1.0 | 1.1 | 1.1 | 1.1 | AOX2        | 8249622..8 alternative oxidase (by homology)             | orf19.4773 | 9420  | CaAOX2       | No significant S.c. match                       |                                                   |                                                     |
| CA2190 | 0.9 | 0.9 | 1.1 | 1.0 | 1.0 | 1.1 | AOX1        | 8252054..8 alternative oxidase (by homology)             | orf19.4774 | 9418  | CaAOX1       | No significant S.c. match                       |                                                   |                                                     |
| CA2191 | 1.0 | 1.1 | 1.0 | 1.0 | 1.0 | 1.0 | IPF9417     | 8255108..8 similar to Saccharomyces cerevisiae           | orf19.4775 | 9417  | IPF9417      | CELL CYCLE AND DNA PROCESSING                   | TRANSCRIPTION                                     | ""CELL RESCUE DEFENSE AND VIRULENCE                 |
| CA2193 | 1.0 | 0.9 | 1.0 | 1.0 | 1.0 | 1.0 | IPF14273    | 8268453..8 Probable ser/thr protein kinase (by homology) | orf19.1182 | 14273 | IPF14273     | CLASSIFICATION NOT YET CLEAR-CUT                |                                                   | protein kinase activity, signal transducer activity |
| CA2194 | 1.0 | 0.9 | 1.0 | 1.0 | 1.0 | 1.0 | RGR1        | 8271407..8 DNA-directed RNA polymerase II (by homology)  | orf19.1182 | 14271 | CaRGR1       | C-compound and carbohydrate metabolism          | ENERGY TRANSCRIPTION                              | transcription regulator activity                    |
| CA2195 | 1.1 | 1.0 | 1.0 | 1.0 | 1.1 | 1.1 | IPF18517.3F | complemer unknown function, 3-prime end                  | orf19.1182 | 16819 | IPF18517.3F  | UNCLASSIFIED PROTEINS                           |                                                   | molecular_function unknown                          |
| CA2196 | 1.0 | 1.1 | 1.0 | 1.0 | 1.1 | 1.0 | IPF18517.5F | complemer unknown function, 5-prime end                  | orf19.1182 | 18517 | IPF18517.5F  | No significant S.c. match                       |                                                   |                                                     |
| CA2197 | 1.0 | 0.9 | 1.0 | 1.0 | 1.0 | 1.0 | IPF8110     | 8290521..8 unknown function                              | orf19.2936 | 8110  | IPF8110      | No significant S.c. match                       |                                                   |                                                     |
| CA2198 | 1.1 | 1.0 | 1.2 | 1.0 | 1.0 | 1.0 | PMM1        | 8291882..8 phosphomannomutase                            | orf19.2937 | 8112  | CaPMM1       | C-compound and carbohydrate metabolism          | ""PROTEIN FATE [folding modification destination] | isomerase activity                                  |
| CA2199 | 1.0 | 1.0 | 0.9 | 1.0 | 1.0 | 0.9 | IPF8113     | complemer unknown function                               | orf19.2938 | 8113  | IPF8113      | UNCLASSIFIED PROTEINS                           |                                                   | molecular_function unknown                          |
| CA2200 | 1.0 | 1.0 | 1.0 | 1.0 | 1.0 | 1.0 | IPF8114     | 8295006..8 unknown function                              | orf19.2939 | 8114  | IPF8114      | UNCLASSIFIED PROTEINS                           |                                                   | molecular_function unknown                          |
| CA2201 | 1.0 | 0.9 | 1.1 | 1.0 | 0.9 | 1.0 | BOS1        | 8295935..8 ER-to-Golgi v-SNARE (by homology)             | orf19.2940 | 19943 | CaBOS1       | CELLULAR TRANSPORT AND TRANSPORT MECHANISMS     | SUBCELLULAR LOCALISATION                          | transporter activity                                |
| CA2202 | 1.0 | 1.1 | 1.1 | 0.9 | 1.1 | 1.1 | SCW4        | 8298078..8 cell wall glucanase (by homology)             | orf19.2941 | 8122  | CaSCW4       | CLASSIFICATION NOT YET CLEAR-CUT                |                                                   |                                                     |
| CA2203 | 1.2 | 1.1 | 1.1 | 1.0 | 1.0 | 1.1 | DIP51.3F    | complemer dicarboxylic amino acid permease               | orf19.2942 | 8123  | CaDIP51.3F   | Amino acid metabolism                           | SUBCELLULAR LOCALISATION                          | TRANSPORT                                           |
| CA2204 | 1.1 | 1.3 | 1.0 | 1.0 | 1.0 | 1.1 | DIP51.5F    | complemer dicarboxylic amino acid permease               | orf19.2943 | 10236 | CaDIP51.5F   | Amino acid metabolism                           | SUBCELLULAR LOCALISATION                          | TRANSPORT FACILITATION                              |
| CA2205 | 1.2 | 1.1 | 1.0 | 1.0 | 0.9 | 1.0 | SEO2        | complemer suppressor of sulfoxide ethionine              | orf19.8319 | 12176 | CaSEO2       | TRANSPORT FACILITATION                          |                                                   | transporter activity                                |
| CA2206 | 1.0 | 1.0 | 1.0 | 1.1 | 0.9 | 1.0 | IPF12173    | 8311220..8 unknown function                              | orf19.698  | 12173 | IPF12173     | UNCLASSIFIED PROTEINS                           |                                                   | molecular_function unknown                          |
| CA2207 | 1.0 | 1.0 | 1.1 | 1.0 | 1.0 | 1.0 | IPF12169    | complemer unknown function                               | orf19.8316 | 12169 | IPF12169     | UNCLASSIFIED PROTEINS                           |                                                   | molecular_function unknown                          |
| CA2208 | 1.0 | 0.9 | 1.0 | 1.0 | 1.0 | 1.0 | IPF17255    | complemer similar to Saccharomyces cerevisiae            | orf19.696  | 17255 | IPF17255     | CELLULAR COMMUNICATION/SIGNAL TRANSDUCTION      | MECHANISMS                                        | signal transducer activity                          |
| CA2209 | 1.1 | 1.1 | 1.0 | 1.0 | 1.0 | 1.0 | IPF18512    | 8327154..8 unknown function                              | orf19.695  | 18512 | IPF18512     | CELLULAR COMMUNICATION/SIGNAL TRANSDUCTION      | MECHANISMS                                        | enzyme regulator activity                           |
| CA2210 | 1.0 | 0.9 | 1.0 | 1.0 | 1.0 | 1.0 | MSL1        | complemer U2 snRNA-associated protein (by homology)      | orf19.4748 | 13925 | CaMSL1       | TRANSCRIPTION                                   | ""PROTEIN FATE [folding modification destination] | ""RNA binding                                       |
| CA2211 | 1.0 | 1.0 | 0.9 | 0.9 | 1.0 | 1.1 | IPF13921    | 8337732..8 Unknown function                              | orf19.4749 | 13921 | IPF13921     | Lipid fatty-acid and isoprenoid metabolism      | ""PROTEIN FATE [folding modification destination] | ""CELLULAR TRANSPORT AND TRANSPORT MECHANISMS       |
| CA2212 | 1.0 | 0.9 | 1.0 | 1.0 | 1.1 | 1.1 | IPF13919    | complemer unknown function                               | orf19.4750 | 13919 | IPF13919     | UNCLASSIFIED PROTEINS                           |                                                   |                                                     |
| CA2213 | 0.9 | 1.0 | 1.0 | 1.0 | 1.0 | 0.9 | IPF16405    | 8342422..8 similar to saccharomyces cerevisiae           | orf19.4751 | 16405 | IPF16405     | UNCLASSIFIED PROTEINS                           |                                                   | structural molecule activity                        |
| CA2214 | 1.0 | 1.2 | 1.0 | 1.2 | 1.2 | 1.1 | IPF9939     | complemer similar to Saccharomyces cerevisiae            | orf19.4752 | 9939  | IPF9939      | C-compound and carbohydrate metabolism          | TRANSCRIPTION                                     | ""CELLULAR TRANSPORT AND TRANSPORT MECHANISMS       |
| CA2215 | 1.0 | 1.0 | 0.9 | 1.1 | 1.1 | 1.0 | PFK26       | 8352093..8 6-phosphofructose-2-kinase (by homology)      | orf19.4753 | 9943  | CaPFK26      | C-compound and carbohydrate metabolism          | SUBCELLULAR LOCALISATION                          | transferase activity                                |
| CA2216 | 0.9 | 1.0 | 1.0 | 1.1 | 1.0 | 1.0 | IPF6235     | 8359756..8 Candida albicans Tca2 retrotransposon         | orf19.5372 | 6235  | IPF6235      | No significant S.c. match                       |                                                   |                                                     |
| CA2217 | 1.0 | 1.0 | 0.9 | 1.1 | 1.1 | 1.1 | POLO        | 8360866..8 polypolyprotein, reverse transcriptase        | orf19.5373 | 6237  | CaPOLO       | UNCLASSIFIED PROTEINS                           |                                                   |                                                     |
| CA2218 | 1.1 | 1.0 | 1.1 | 1.1 | 1.1 | 1.0 | IPF18508    | complemer unknown function                               | orf19.5375 | 18508 | IPF18508     | No significant S.c. match                       |                                                   |                                                     |
| CA2219 | 1.0 | 1.1 | 1.0 | 1.0 | 1.0 | 1.0 | CAT8        | complemer transcription factor involved in               | orf19.1256 | 9674  | CaCAT8       | C-compound and carbohydrate metabolism          | ENERGY TRANSCRIPTION                              | transcription regulator activity                    |
| CA2220 | 1.1 | 1.1 | 1.0 | 1.0 | 1.1 | 0.9 | NTG1        | 8371878..8 endonuclease III-like g Ntg1                  | orf19.5098 | 9671  | CaNTG1       | CELL CYCLE AND DNA PROCESSING                   |                                                   | DNA binding                                         |
| CA2221 | 1.0 | 1.0 | 1.0 | 1.0 | 1.1 | 1.2 | IPF9670     | complemer membrane transporter MRP-like                  | orf19.5100 | 9670  | IPF9670      | CELL RESCUE DEFENSE AND VIRULENCE               | ""TRANSPORT FACILITATION                          |                                                     |
| CA2222 | 1.0 | 1.2 | 1.1 | 1.0 | 1.0 | 1.0 | CCR4        | 8379374..8 glucose-repressible alcohol dehydrogenase     | orf19.5101 | 13962 | CaCCR4       | Amino acid metabolism                           | C-compound and carbohydrate metabolism            | TRANSCRIPTION                                       |
| CA2223 | 1.0 | 0.9 | 1.0 | 1.1 | 1.0 | 1.1 | PLB5        | complemer putative phospholipase                         | orf19.1256 | 13965 | CaPLB5       | Lipid fatty-acid and isoprenoid metabolism      | ""Other virulence attributes                      |                                                     |
| CA2224 | 1.1 | 1.0 | 1.0 | 1.0 | 1.1 | 1.0 | UGA6.3EOC   | 8387122..8 GABA-specific transport protein, 3-prime end  |            | 19944 | CaUGA6.3     | No significant S.c. match                       |                                                   |                                                     |
| CA2225 | 0.9 | 0.3 | 0.9 | 1.1 | 1.0 | 0.3 | SUR2        | 8389970..8 Hydroxylation of C-4 of the sphingolipid      | orf19.5818 | 5688  | CaSUR2       | Lipid fatty-acid and isoprenoid metabolism      | ""SUBCELLULAR LOCALISATION                        | oxidoreductase activity                             |
| CA2226 | 0.9 | 1.0 | 1.0 | 1.0 | 1.1 | 1.0 | BET3.EXON2  | 8391526..8 targeting and fusion of ER to Golgi           | orf19.5817 | 5686  | CaBET3.EXON2 | CELLULAR TRANSPORT AND TRANSPORT MECHANISMS     | SUBCELLULAR LOCALISATION                          | molecular_function unknown                          |
| CA2227 | 0.9 | 1.0 | 0.9 | 1.0 | 1.0 | 1.0 | EBP7        | complemer NADPH DEHYDROGENASE by homology                | orf19.5816 | 5684  | CaEBP7       | ENERGY                                          |                                                   |                                                     |
| CA2228 | 1.1 | 1.0 | 1.0 | 1.0 | 0.9 | 1.0 | SCT12       | 8394867..8 Suppresses a choline-transport mutation       | orf19.5815 | 5683  | CaSCT12      | TRANSPORT FACILITATION                          |                                                   |                                                     |
| CA2229 | 1.0 | 1.0 | 1.0 | 1.0 | 1.0 | 1.0 | IPF5682     | 8397606..8 unknown function                              | orf19.5814 | 5682  | IPF5682      | No significant S.c. match                       |                                                   |                                                     |
| CA2230 | 1.0 | 1.0 | 1.0 | 1.0 | 1.0 | 1.0 | IPF10936    | 8403208..8 unknown function                              | orf19.3928 | 10936 | IPF10936     | TRANSCRIPTION                                   | SUBCELLULAR LOCALISATION                          |                                                     |
| CA2231 | 1.0 | 1.1 | 1.0 | 0.9 | 1.1 | 0.9 | IPF10934    | complemer similar to Saccharomyces cerevisiae            | orf19.3926 | 10934 | IPF10934     | Nucleotide metabolism                           |                                                   | RNA binding                                         |
| CA2232 | 0.9 | 0.9 | 1.0 | 1.1 | 1.0 | 1.0 | IPF10929    | 8406777..8 unknown function                              | orf19.3925 | 10929 | IPF10929     | CELL CYCLE AND DNA PROCESSING                   | CELL FATE                                         | SUBCELLULAR LOCALISATION                            |
| CA2233 | 0.9 | 0.9 | 1.0 | 1.0 | 1.0 | 1.0 | IFJ3        | 8409384..8 unknown function                              | orf19.3924 | 10924 | CaIFJ3       | UNCLASSIFIED PROTEINS                           |                                                   |                                                     |
| CA2234 | 0.9 | 1.0 | 1.0 | 1.0 | 0.9 | 1.1 | IPF10922    | 8411631..8 unknown function                              | orf19.3923 | 10922 | IPF10922     | No significant S.c. match                       |                                                   |                                                     |
| CA2235 | 1.1 | 1.0 | 0.9 | 1.0 | 1.0 | 1.0 | MPD1        | complemer disulfide isomerase related protein            | orf19.3920 | 12689 | CaMPD1       | PROTEIN FATE [folding modification destination] | ""SUBCELLULAR LOCALISATION                        | oxidoreductase activity, isomerase activity         |
| CA2236 | 1.0 | 1.0 | 1.1 | 1.1 | 1.0 | 1.2 | IFA23       | 8417177..8 unknown function                              | orf19.3919 | 12694 | CaIFA23      | CELL CYCLE AND DNA PROCESSING                   | SUBCELLULAR LOCALISATION                          |                                                     |
| CA2237 | 1.0 | 1.0 | 1.1 | 1.1 | 1.0 | 0.9 | IPF10032.3F | complemer unknown function, 3-prime end                  | orf19.3917 | 12695 | IPF10032.3F  | TRANSCRIPTION                                   | SUBCELLULAR LOCALISATION                          |                                                     |
| CA2238 | 0.9 | 1.0 | 0.9 | 0.9 | 1.0 | 1.0 | IPF10032.5F | complemer unknown function, 5-prime end                  | orf19.3916 | 10032 | IPF10032.5F  | UNCLASSIFIED PROTEINS                           |                                                   | molecular_function unknown                          |

|        |     |     |     |        |     |     |              |                                                             |       |            |                                                                                                        |
|--------|-----|-----|-----|--------|-----|-----|--------------|-------------------------------------------------------------|-------|------------|--------------------------------------------------------------------------------------------------------|
| CA2240 | 1.1 | 1.0 | 1.1 | 1.1    | 0.9 | 1.0 | CRD2         | 8423295..8Cu-binding metallothio Cu-binding metallothio     | 17996 | CaCRD2     | No significant S.c. match                                                                              |
| CA2241 | 1.1 | 1.0 | 0.9 | 1.0    | 1.0 | 1.0 | IFQ1.3F      | complemer Unknown function, 3-prime end orf19.4674          | 7422  | CaIFQ1.3F  | No significant S.c. match                                                                              |
| CA2242 | 0.9 | 0.8 | 0.9 | 0.9    | 0.9 | 0.9 | IFQ1.5F      | complemer Unknown function, 5-prime end orf19.4673          | 7421  | CaIFQ1.5F  | No significant S.c. match                                                                              |
| CA2243 | 1.1 | 1.0 | 1.1 | 1.0    | 1.1 | 1.0 | IPF7414      | 8431030..8putative transcription factor (by ho orf19.4670   | 7414  | IPF7414    | C-compound and carbohydrate metabolism TRANSCRIPTION                                                   |
| CA2244 | 1.1 | 1.1 | 0.9 | 0.9    | 0.9 | 1.0 | AAT22        | complemer aspartate aminotransferase (by ho orf19.4669      | 7410  | CaAAT22    | Amino acid metabolism Nitrogen and sulphur metabolism SUBCELLULAR LOCALISATION                         |
| CA2245 | 1.0 | 1.0 | 1.0 | 1.0    | 1.0 | 1.1 | IPF7409      | complemer unknown function orf19.4668                       | 7409  | IPF7409    | C-compound and carbohydrate metabolism SUBCELLULAR LOCALISATION                                        |
| CA2246 | 1.1 | 1.0 | 1.1 | 1.0    | 1.0 | 1.0 | IPF7405      | complemer unknown function orf19.4666                       | 7405  | IPF7405    | No significant S.c. match                                                                              |
| CA2247 | 0.9 | 1.0 | 1.1 | 1.0    | 1.0 | 1.0 | IPF7404      | complemer unknown function orf19.1213!                      | 7404  | IPF7404    | No significant S.c. match                                                                              |
| CA2248 | 1.1 | 0.9 | 1.0 | 1.0    | 1.0 | 0.9 | IPF11469     | 8445367..8 unknown function orf19.9902                      | 11469 | IPF11469   | No significant S.c. match                                                                              |
| CA2249 | 1.0 | 1.0 | 1.0 | 1.0    | 1.0 | 1.0 | POL2         | complemer DNA-directed DNA polymerase epsilon orf19.2365    | 14265 | CaPOL2     | CELL CYCLE AND DNA PROCESSING SUBCELLULAR LOCALISATION nucleotidyltransferase activity                 |
| CA2250 | 1.0 | 1.1 | 1.0 | 1.0    | 1.1 | 1.0 | MIS11        | 8455731..8 mitochondrial C1-tetrahydrofolate orf19.2364     | 12851 | CaMIS11    | Amino acid metabolism Nucleotide metabolism Purine ribonucleotide metabolism ligase activity           |
| CA2251 | 1.0 | 1.0 | 1.0 | 0.9    | 1.1 | 1.1 | IPF12845     | 8459213..8 unknown function orf19.2363                      | 12845 | IPF12845   | PROTEIN FATE [folding modification destination] molecular_function unknown                             |
| CA2252 | 0.9 | 1.0 | 1.1 | 1.0    | 0.9 | 1.0 | IPF12844     | complemer unknown function orf19.9898                       | 12844 | IPF12844   | UNCLASSIFIED PROTEINS molecular_function unknown                                                       |
| CA2253 | 0.9 | 1.0 | 1.0 | 1.0    | 0.9 | 1.0 | IPF15485     | 8469219..8 unknown function orf19.1959                      | 15485 | IPF15485   | UNCLASSIFIED PROTEINS molecular_function unknown                                                       |
| CA2254 | 1.0 | 0.9 | 1.0 | 1.0    | 1.0 | 0.9 | IPF15487     | 8470616..8 unknown function orf19.1958                      | 15487 | IPF15487   | No significant S.c. match                                                                              |
| CA2255 | 1.1 | 1.0 | 0.9 | 1.0    | 1.0 | 1.0 | CYC3         | 8477757..8 cytochrome C heme ly: cytochrome orf19.1957      | 13303 | CaCYC3     | Metabolism of vitamins cofactors and prosthetic groups """"PROTEIN FA' lyase activity                  |
| CA2256 | 1.0 | 1.0 | 1.0 | 1.0    | 1.0 | 1.0 | IPF14757     | complemer unknown function orf19.1956                       | 14757 | IPF14757   | UNCLASSIFIED PROTEINS molecular_function unknown                                                       |
| CA2257 | 1.1 | 0.9 | 1.0 | 1.0    | 1.0 | 1.0 | SHR5         | 8481948..8 RAS suppressor (by homology) orf19.1955          | 14758 | CaSHR5     | Nucleotide metabolism C-compound and carbohydrate metabolism CELL transferase activity                 |
| CA2258 | 1.0 | 1.0 | 1.0 | 1.0    | 0.9 | 0.9 | IFR1         | 8486422..8 Unknown function orf19.1763                      | 17956 | CaIFR1     | SUBCELLULAR LOCALISATION                                                                               |
| CA2259 | 1.0 | 0.9 | 1.1 | 0.9    | 0.9 | 1.0 | IPF6845      | complemer unknown function orf19.1762                       | 6845  | IPF6845    | UNCLASSIFIED PROTEINS protein phosphatase activity                                                     |
| CA2260 | 0.9 | 0.9 | 0.9 | 1.0    | 1.0 | 1.0 | OST2         | 8488973..8 Oligosaccharyltransferase epsilon orf19.1761     | 6848  | CaOST2     | C-compound and carbohydrate metabolism ""PROTEIN FATE [folding m transferase activity                  |
| CA2261 | 1.0 | 1.0 | 1.1 | 1.0    | 1.1 | 1.1 | RAS1         | complemer GTP-binding protein (b Ras1p [Car orf19.1760      | 6849  | CaRAS1     | Nucleotide metabolism C-compound and carbohydrate metabolism CELL hydrolase activity                   |
| CA2262 | 1.0 | 1.0 | 1.0 | 1.0    | 1.0 | 1.0 | IPF6857      | 8495988..8 putative transcriptional regulator (L orf19.1757 | 6857  | IPF6857    | Amino acid metabolism Nitrogen and sulphur metabolism TRANSCRIPTION DNA binding                        |
| CA2263 | 1.0 | 0.8 | 1.0 | 1.0    | 1.0 | 1.0 | GPD1         | 8500901..8 Glycerol-3-phosphate dehydrogen orf19.1756       | 6860  | CaGPD1     | C-compound and carbohydrate metabolism SUBCELLULAR LOCALISATION oxidoreductase activity                |
| CA2265 | 1.0 | 1.0 | 0.9 | 1.0    | 1.0 | 1.1 | CMK2         | complemer Ca2+/calmodulin-dependent ser/thor orf19.1754     | 6866  | CaCMK2     | CELLULAR COMMUNICATION/SIGNAL TRANSDUCTION MECHANISM protein kinase activity                           |
| CA2266 | 1.0 | 1.0 | 1.0 | 1.0    | 1.0 | 1.1 | HEM1         | 8508965..8 5-aminolevulinic acid synthase orf19.1013;       | 2755  | CaHEM1     | Metabolism of vitamins cofactors and prosthetic groups ""SUBCELLULAR transferase activity              |
| CA2267 | 1.0 | 1.0 | 1.0 | 1.1    | 0.9 | 1.0 | IFU1.5F      | 8511139..8 Unknown function, 5-p conserved orf19.2600       | 2757  | CaIFU1.5F  | CELL CYCLE AND DNA PROCESSING SUBCELLULAR LOCALISATION structural molecule activity                    |
| CA2268 | 1.0 | 0.9 | 1.0 | 1.0    | 1.0 | 1.0 | IFU1.3F      | 8513229..8 Unknown function, 3-prime end                    | 18497 | CaIFU1.3F  | No significant S.c. match                                                                              |
| CA2269 | 1.1 | 1.0 | 1.0 | 1.1    | 1.0 | 1.0 | YOR100       | 8514491..8 Putative mitochondrial putative mi orf19.2599    | 2761  | CaYOR100   | CELLULAR TRANSPORT AND TRANSPORT MECHANISMS transporter activity                                       |
| CA2270 | 1.0 | 1.0 | 1.1 | 1.2    | 1.2 | 1.0 | VMA4         | 8515783..8 H+-transporting ATPase vacuolar A' orf19.2598    | 2763  | CaVMA4     | PROTEIN FATE [folding modification destination] ""CELLULAR TRANSP transporter activity                 |
| CA2271 | 1.0 | 0.9 | 1.0 | 1.0    | 1.0 | 1.0 | MRS2         | 8516787..8 Mitochondrial RNA splicing protein orf19.2597    | 2765  | CaMRS2     | TRANSCRIPTION SUBCELLULAR LOCALISATION transporter activity                                            |
| CA2272 | 1.0 | 1.0 | 1.0 | 1.0    | 1.0 | 1.0 | RPA43        | complemer DNA-directed RNA polymerase I, orf19.2594         | 19945 | CaRPA43    | TRANSCRIPTION SUBCELLULAR LOCALISATION nucleotidyltransferase activity                                 |
| CA2273 | 1.0 | 1.0 | 1.0 | 1.1    | 0.9 | 1.0 | BIO2         | 8520374..8 biotin synthetase (by homology) orf19.2593       | 2771  | CaBIO2     | Metabolism of vitamins cofactors and prosthetic groups transferase activity                            |
| CA2274 | 1.0 | 1.0 | 1.1 | 1.0    | 0.9 | 1.0 | BIO3         | complemer DAPA aminotransferase (by homo orf19.2591         | 2774  | CaBIO3     | Metabolism of vitamins cofactors and prosthetic groups transferase activity                            |
| CA2275 | 1.0 | 0.9 | 1.0 | 1.0    | 0.9 | 1.0 | BIO4         | 8523604..8 dethiobiotin synthetase (by homo orf19.2590      | 2776  | CaBIO4     | Metabolism of vitamins cofactors and prosthetic groups ligase activity                                 |
| CA2276 | 1.0 | 1.1 | 1.0 | 1.1    | 1.0 | 0.9 | HN3          | 8524466..8 Choline permease (by homology) orf19.2587        | 2781  | CaHN3      | CELLULAR TRANSPORT AND TRANSPORT MECHANISMS SUBCELLULAR LOCALISATION TRANSP                            |
| CA2277 | 1.1 | 1.0 | 1.0 | 1.0    | 1.0 | 1.0 | DRS21        | complemer Membrane-spanning Ca-ATPase (orf19.783            | 10810 | CaDRS21    | TRANSPORT FACILITATION transporter activity                                                            |
| CA2278 | 0.9 | 0.9 | 1.0 | 1.1    | 1.0 | 1.0 | IPF10806     | 8533188..8 unknown function orf19.782                       | 10806 | IPF10806   | Lipid fatty-acid and isoprenoid metabolism ""SUBCELLULAR LOCALISA' molecular_function unknown          |
| CA2279 | 1.1 | 1.1 | 1.0 | 1.1    | 1.0 | 0.9 | DUR31        | 8536333..8 Urea transport protein (by homolo orf19.781      | 10804 | CaDUR31    | REGULATION OF/INTERACTION WITH CELLULAR ENVIRONMENT S transporter activity                             |
| CA2280 | 0.9 | 1.0 | 1.0 | 0.9    | 1.0 | 1.1 | DUR1,2       | 8539570..8 urea amidolyase (by homology) orf19.780          | 9766  | CaDUR1,2   | Amino acid metabolism Nitrogen and sulphur metabolism Nucleotide m hydrolase activity, ligase activity |
| CA2281 | 1.1 | 1.0 | 1.0 | 1.0    | 1.0 | 1.0 | HAT1         | 8545321..8 histone acetyltransferase (by homo orf19.779     | 9767  | CaHAT1     | PROTEIN FATE [folding modification destination] ""SUBCELLULAR LOC transferase activity                 |
| CA2282 | 0.9 | 1.1 | 1.0 | 0.9    | 1.0 | 1.0 | IPF14438     | 8548850..8 unknown function orf19.1299!                     | 12637 | IPF14438   | No significant S.c. match                                                                              |
| CA2283 | 1.0 | 1.1 | 1.1 | 1.1    | 1.1 | 1.1 | MRT4         | 8549818..8 required for mRNA decay (by hom orf19.1299!      | 12634 | CaMRT4     | Nucleotide metabolism TRANSCRIPTION PROTEIN SYNTHESIS molecular_function unknown                       |
| CA2284 | 1.0 | 1.0 | 1.0 | 1.0    | 1.0 | 1.0 | MIF2         | complemer required for normal chromosome sorf19.5551        | 12632 | CaMIF2     | CELL CYCLE AND DNA PROCESSING SUBCELLULAR LOCALISATION DNA binding                                     |
| CA2285 | 1.0 | 1.1 | 0.9 | 0.9    | 1.1 | 1.0 | IPF12629     | complemer unknown function orf19.5552                       | 12629 | IPF12629   | UNCLASSIFIED PROTEINS molecular_function unknown                                                       |
| CA2286 | 1.0 | 1.0 | 0.9 | 1.0    | 1.0 | 1.0 | IPF5369      | 8555844..8 unknown function orf19.5553                      | 5369  | IPF5369    | UNCLASSIFIED PROTEINS molecular_function unknown                                                       |
| CA2287 | 1.0 | 1.0 | 0.9 | 0.9    | 1.0 | 1.0 | IPF5373      | complemer unknown function orf19.5555                       | 5373  | IPF5373    | C-compound and carbohydrate metabolism SUBCELLULAR LOCALISATION                                        |
| CA2288 | 1.0 | 1.0 | 1.0 | 1.0    | 1.0 | 1.0 | IPF5376      | 8563102..8 unknown function orf19.5557                      | 5376  | IPF5376    | PROTEIN FATE [folding modification destination]                                                        |
| CA2289 | 1.0 | 0.9 | 1.0 | 0.9    | 1.0 | 1.1 | RBF1.3       | complemer RPG-BOX-BINDING F.Rbf1 [Cand orf19.1300!          | 5380  | CaRBF1.3   | No significant S.c. match                                                                              |
| CA2290 | 1.0 | 1.0 | 1.0 | 1.0    | 1.0 | 1.0 | IPF16300     | complemer putative aldehyde dehydrogenase orf19.742         | 16300 | IPF16300   | CLASSIFICATION NOT YET CLEAR-CUT                                                                       |
| CA2291 | 1.0 | 1.1 | 1.1 | 1.1    | 0.9 | 1.0 | IPF9740      | complemer oligo-1,4 -1,4-glucantransferase / orf19.744      | 9743  | IPF9740    | C-compound and carbohydrate metabolism ENERGY transferase activity                                     |
| CA2292 | 1.0 | 0.9 | 1.1 | 1.0    | 0.9 | 0.9 | VAC8         | 8585630..8 required for vacuole inheritance ar orf19.745    | 9747  | CaVAC8     | PROTEIN FATE [folding modification destination] ""CONTROL OF CELL protein binding                      |
| CA2293 | 1.0 | 1.0 | 1.0 | 1.0    | 1.0 | 1.1 | IPF9748      | complemer unknown function orf19.746                        | 9748  | IPF9748    | UNCLASSIFIED PROTEINS molecular_function unknown                                                       |
| CA2294 | 1.0 | 1.1 | 1.0 | 1.1    | 1.1 | 1.0 | IPF19946     | complemer similar to Saccharomyces cerevisi orf19.747       | 19946 | IPF19946   | SUBCELLULAR LOCALISATION hydrolase activity                                                            |
| CA2295 | 1.0 | 1.0 | 1.0 | 1.1    | 1.0 | 1.1 | HOS2         | complemer putative histone deacetylase (by h orf19.5377     | 8228  | CaHOS2     | CELL CYCLE AND DNA PROCESSING ""PROTEIN FATE [folding modi hydrolase activity                          |
| CA2296 | 0.9 | 1.1 | 1.0 | 1.0    | 1.0 | 1.0 | SL1          | 8601515..8 Proteasome subunit YC7alpha (by orf19.5378       | 8226  | CaSL1      | PROTEIN FATE [folding modification destination] ""SUBCELLULAR LOC peptidase activity                   |
| CA2297 | 1.0 | 0.9 | 0.9 | 0.9    | 1.1 | 1.0 | ERG4         | complemer sterol C-24 reductase (by homolog orf19.5379      | 8225  | CaERG4     | Lipid fatty-acid and isoprenoid metabolism oxidoreductase activity                                     |
| CA2298 | 1.0 | 1.1 | 1.0 | 1.0    | 1.0 | 1.0 | IPF8224      | complemer unknown function orf19.5380                       | 8224  | IPF8224    | Amino acid metabolism TRANSCRIPTION SUBCELLULAR LOCALISATION UNCLASSIFIED PROTEINS                     |
| CA2299 | 1.0 | 1.0 | 1.0 | 1.1    | 0.9 | 1.0 | IPF8222      | complemer unknown function orf19.5381                       | 8222  | IPF8222    | TRANSCRIPTION RNA binding                                                                              |
| CA2300 | 1.1 | 1.0 | 1.0 | 1.3    | 1.1 | 1.3 | PMA1         | complemer plasma membrane H+-adenosine orf19.5383           | 8215  | CaPMA1     | REGULATION OF/INTERACTION WITH CELLULAR ENVIRONMENT S transporter activity                             |
| CA2302 | 1.1 | 1.0 | 1.0 | 1.1    | 1.1 | 0.9 | IPF6518      | 8629553..8 unknown function orf19.1691                      | 6518  | IPF6518    | UNCLASSIFIED PROTEINS                                                                                  |
| CA2303 | 1.0 | 0.9 | 1.0 | 1.0    | 1.1 | 1.1 | TOS1         | complemer putative Anchor subunit of a-agglu orf19.1690     | 6517  | CaTOS1     | UNCLASSIFIED PROTEINS molecular_function unknown                                                       |
| CA2304 | 1.0 | 1.0 | 1.0 | 1.0    | 1.0 | 1.0 | PRP43        | 8636365..8 RNA-dependent ATPase (by homo orf19.1687         | 6512  | CaPRP43    | TRANSCRIPTION SUBCELLULAR LOCALISATION RNA binding, helicase activity                                  |
| CA2305 | 1.1 | 1.0 | 1.0 | 1.0    | 0.9 | 1.0 | MPA43        | 8639114..8 Unknown function orf19.1686                      | 6511  | CaMPA43    | UNCLASSIFIED PROTEINS molecular_function unknown                                                       |
| CA2306 | 0.9 | 1.0 | 1.0 | 1.1    | 1.1 | 1.1 | IPF6510      | 8641469..8 unknown function orf19.1685                      | 6510  | IPF6510    | TRANSCRIPTION SUBCELLULAR LOCALISATION                                                                 |
| CA2307 | 1.0 | 1.0 | 0.9 | 1.0    | 1.0 | 1.1 | IPF18488.5EC | 8642940..8 unknown function, 5-prime end                    | 18488 | IPF18488.5 | No significant S.c. match                                                                              |
| CA2308 | 1.0 | 1.0 | 1.0 | 1.0    | 0.9 | 1.0 | IPF9874.3    | 8649277..8 similar to Saccharomyces cerevisi orf19.8953     | 9874  | IPF9874.3  | Lipid fatty-acid and isoprenoid metabolism ""CELLULAR COMMUNICATI hydrolase activity                   |
| CA2309 | 1.0 | 1.0 | 1.0 | 1.0    | 1.0 | 1.1 | IPF9875      | complemer unknown function orf19.1374                       | 9875  | IPF9875    | PROTEIN FATE [folding modification destination]                                                        |
| CA2310 | 1.1 | 1.1 | 1.0 | 1.0    | 1.1 | 1.0 | LEU42        | complemer 2-isopropylmalalate synthase (by l orf19.1375     | 9877  | CaLEU42    | Amino acid metabolism SUBCELLULAR LOCALISATION                                                         |
| CA2311 | 1.1 | 0.9 | 0.9 | by 0.9 | 1.0 | 1.1 | SSO2         | complemer syntxin (by homology) orf19.1376                  | 16993 | CaSSO2     | CELLULAR TRANSPORT AND TRANSPORT MECHANISMS SUBCELL transporter activity                               |
| CA2312 | 1.0 | 1.0 | 1.0 | 1.0    | 1.0 | 1.0 | IPF16498     | 8658174..8 similar to Saccharomyces cerevisi orf19.1377     | 16498 | IPF16498   | Amino acid metabolism TRANSCRIPTION CELL FATE SUBCELLULAR transferase activity                         |
| CA2313 | 1.0 | 1.0 | 1.0 | 0.9    | 1.0 | 1.0 | ERF3         | complemer translation release factor 3 orf19.1378           | 19754 | CaERF3     | CELL CYCLE AND DNA PROCESSING PROTEIN SYNTHESIS SUBCE translation regulator activity                   |

|        |     |     |     |     |     |     |              |                                                                   |            |       |              |                                                                   |                                                                      |
|--------|-----|-----|-----|-----|-----|-----|--------------|-------------------------------------------------------------------|------------|-------|--------------|-------------------------------------------------------------------|----------------------------------------------------------------------|
| CA2314 | 0.8 | 0.9 | 0.8 | 0.8 | 1.0 | 0.8 | IPF14545     | 8662058..8 unknown function                                       | orf19.1381 | 14545 | IPF14545     | SUBCELLULAR LOCALISATION                                          | molecular_function unknown                                           |
| CA2315 | 1.1 | 1.0 | 1.0 | 1.0 | 1.0 | 1.0 | YEA4         | complemer Golgi uridine diphosphate-N-acetyl transferase          | orf19.8962 | 14544 | CaYEA4       | C-compound and carbohydrate metabolism                            | PROTEIN FATE [folding m transporter activity]                        |
| CA2316 | 1.0 | 0.9 | 1.0 | 1.0 | 1.0 | 1.0 | IPF14542     | 8664812..8 unknown function                                       | orf19.8963 | 14542 | IPF14542     | No significant S.c. match                                         |                                                                      |
| CA2317 | 0.9 | 0.9 | 1.0 | 1.0 | 1.1 | 1.0 | IPF13586     | complemer unknown function                                        | orf19.5479 | 13586 | IPF13586     | No significant S.c. match                                         |                                                                      |
| CA2318 | 1.1 | 1.0 | 1.0 | 1.1 | 1.1 | 0.9 | ILV1         | 8672919..8 Threonine dehydratase (by homology)                    | orf19.5480 | 16147 | CaILV1       | Amino acid metabolism                                             | SUBCELLULAR LOCALISATION lyase activity                              |
| CA2319 | 1.0 | 1.0 | 1.0 | 1.0 | 1.0 | 1.0 | GUF1         | complemer GTP-binding protein (by homology)                       | orf19.5483 | 19755 | CaGUF1       | PROTEIN SYNTHESIS                                                 | hydrolase activity                                                   |
| CA2320 | 1.0 | 1.0 | 1.0 | 0.9 | 1.0 | 1.0 | SER1         | complemer phosphoserine transaminase (by homology)                | orf19.5484 | 10985 | CaSER1       | Amino acid metabolism                                             | Metabolism of vitamins cofactors and prosthetic transferase activity |
| CA2321 | 1.0 | 0.9 | 1.0 | 1.0 | 1.0 | 0.9 | MEC3         | complemer G2-specific checkpoint protein (by homology)            | orf19.5485 | 10984 | CaMEC3       | CELL CYCLE AND DNA PROCESSING                                     | CONTROL OF CELLULAR ORGANIZATION DNA binding                         |
| CA2322 | 1.0 | 1.0 | 1.0 | 1.0 | 1.0 | 1.1 | YSH1         | 8679334..8 component of pre-mRNA polyadenylation                  | orf19.5486 | 10981 | CaYSH1       | TRANSCRIPTION SUBCELLULAR LOCALISATION                            | RNA binding                                                          |
| CA2323 | 1.0 | 1.0 | 0.9 | 1.0 | 0.9 | 0.9 | SMD2         | 8682305..8 U1 snRNP protein of the Sm class protein (by homology) | orf19.5487 | 10980 | CaSMD2       | TRANSCRIPTION SUBCELLULAR LOCALISATION                            | RNA binding                                                          |
| CA2324 | 1.0 | 1.0 | 1.0 | 0.9 | 1.0 | 1.1 | CDC46        | complemer cell division control protein (by homology)             | orf19.5487 | 10979 | CaCDC46      | CELL CYCLE AND DNA PROCESSING                                     | SUBCELLULAR LOCALISATION DNA binding                                 |
| CA2325 | 1.1 | 1.0 | 1.0 | 1.0 | 1.0 | 0.9 | IPF10977     | 8685237..8 unknown function                                       | orf19.5488 | 10977 | IPF10977     | CLASSIFICATION NOT YET CLEAR-CUT                                  | molecular_function unknown                                           |
| CA2326 | 1.1 | 1.1 | 0.9 | 1.0 | 1.0 | 1.0 | NUBM         | 8689792..8 nucleotide-binding respiratory complex                 | orf19.1197 | 4781  | CaNUBM       | No significant S.c. match                                         |                                                                      |
| CA2327 | 0.9 | 1.0 | 1.0 | 1.0 | 1.0 | 1.0 | IPF4782      | 8692371..8 probable membrane protein (by homology)                | orf19.1197 | 4782  | IPF4782      | UNCLASSIFIED PROTEINS                                             | molecular_function unknown                                           |
| CA2328 | 0.8 | 1.0 | 1.0 | 1.0 | 1.1 | 1.0 | MED8         | complemer transcriptional regulation mediator                     | orf19.1197 | 4783  | CaMED8       | TRANSCRIPTION SUBCELLULAR LOCALISATION                            | transcription regulator activity                                     |
| CA2329 | 1.0 | 0.9 | 0.9 | 0.8 | 1.0 | 0.9 | IPF4784      | 8694636..8 unknown function                                       | orf19.4498 | 4784  | IPF4784      | No significant S.c. match                                         |                                                                      |
| CA2330 | 1.0 | 1.0 | 1.0 | 1.0 | 1.0 | 1.0 | RIM2         | complemer mitochondrial carrier protein (by homology)             | orf19.4499 | 4785  | CaRIM2       | ENERGY CELLULAR TRANSPORT AND TRANSPORT MECHANISMS                | transporter activity                                                 |
| CA2331 | 1.1 | 1.1 | 1.0 | 0.9 | 1.0 | 1.0 | MOT1         | complemer transcriptional accessory protein                       | orf19.4502 | 4789  | CaMOT1       | TRANSCRIPTION SUBCELLULAR LOCALISATION                            | hydrolase activity                                                   |
| CA2332 | 1.1 | 0.9 | 1.0 | 1.1 | 1.2 | 1.0 | IPF4792      | complemer unknown function                                        | orf19.1197 | 4792  | IPF4792      | No significant S.c. match                                         |                                                                      |
| CA2333 | 1.0 | 0.9 | 0.9 | 1.0 | 1.1 | 0.9 | ADH4         | complemer probable alcohol dehydrogenase (by homology)            | orf19.1198 | 4794  | CaADH4       | C-compound and carbohydrate metabolism                            | ENERGY SUBCELLULAR LOCALISATION UNCLASSIFIED PF                      |
| CA2334 | 1.1 | 1.0 | 1.0 | 1.0 | 1.0 | 1.0 | ADH3         | complemer probable alcohol dehydrogenase (by homology)            | orf19.1198 | 4795  | CaADH3       | C-compound and carbohydrate metabolism                            | ENERGY SUBCELLULAR LOCALISATION UNCLASSIFIED PF                      |
| CA2335 | 1.1 | 0.9 | 1.1 | 1.2 | 1.1 | 1.1 | LYS21        | complemer homocitrate synthase (by homology)                      | orf19.1198 | 18482 | CaLYS21      | Amino acid metabolism                                             | C-compound and carbohydrate metabolism SUBCELLULAR LOCALISATION      |
| CA2336 | 0.9 | 1.0 | 1.1 | 1.2 | 1.2 | 1.2 | IPF13383.53E | complemer unknown function, internal fragment                     | orf19.2353 | 13383 | IPF13383.53E | UNCLASSIFIED PROTEINS                                             | molecular_function unknown                                           |
| CA2337 | 1.0 | 1.0 | 1.0 | 1.0 | 1.0 | 0.9 | IPF13379     | 8716095..8 unknown function                                       | orf19.2352 | 13379 | IPF13379     | UNCLASSIFIED PROTEINS                                             | molecular_function unknown                                           |
| CA2338 | 0.9 | 1.0 | 1.0 | 1.0 | 1.0 | 1.0 | NIT3         | complemer nitrilase (by homology)                                 | orf19.2351 | 13378 | CaNIT3       | Nitrogen and sulphur metabolism                                   | hydrolase activity                                                   |
| CA2339 | 1.0 | 1.0 | 1.0 | 1.1 | 1.0 | 1.0 | IPF13377     | complemer unknown function                                        | orf19.2350 | 13377 | IPF13377     | CELL RESCUE DEFENSE AND VIRULENCE                                 | TRANSPORT FACILITATION                                               |
| CA2340 | 0.9 | 1.0 | 0.9 | 1.0 | 1.0 | 1.0 | MNN5         | complemer Golgi alpha-1,2-mannosyltransferase                     | orf19.2347 | 15847 | CaMNN5       | CELL FATE                                                         |                                                                      |
| CA2341 | 1.1 | 1.0 | 1.0 | 1.1 | 1.1 | 1.0 | IPF13838     | 8723633..8 unknown function                                       | orf19.2346 | 13838 | IPF13838     | UNCLASSIFIED PROTEINS                                             | molecular_function unknown                                           |
| CA2342 | 1.1 | 1.0 | 1.0 | 1.2 | 1.1 | 1.1 | IPF13836     | complemer probable heat shock protein (by homology)               | orf19.2344 | 13836 | IPF13836     | No significant S.c. match                                         |                                                                      |
| CA2343 | 1.0 | 1.1 | 1.0 | 1.0 | 1.0 | 0.9 | IPF8671      | 8728909..8 unknown function                                       | orf19.2343 | 8671  | IPF8671      | PROTEIN FATE [folding modification destination]                   | CELLULAR TRANSPORT protein binding                                   |
| CA2344 | 1.0 | 1.0 | 1.1 | 1.0 | 1.0 | 0.9 | SFT2         | 8730585..8 similar to Saccharomyces cerevisiae                    | orf19.2342 | 8674  | CaSFT2       | SUBCELLULAR LOCALISATION                                          | molecular_function unknown                                           |
| CA2345 | 0.9 | 1.0 | 0.9 | 1.0 | 1.0 | 1.0 | HNT1         | complemer similarity to protein kinase C                          | orf19.2341 | 8675  | CaHNT1       | Nucleotide metabolism                                             | hydrolase activity                                                   |
| CA2346 | 1.0 | 1.0 | 1.1 | 1.0 | 1.0 | 1.0 | SEF1         | complemer Putative transcription factor1                          | orf19.3753 | 7790  | CaSEF1       | TRANSCRIPTION CELL FATE SUBCELLULAR LOCALISATION                  | molecular_function unknown                                           |
| CA2347 | 0.8 | 0.8 | 0.9 | 0.8 | 1.0 | 0.9 | RAD51        | complemer DNA repair protein by homology                          | orf19.3752 | 7787  | CaRAD51      | CELL CYCLE AND DNA PROCESSING                                     | CELL FATE SUBCELLULAR LOCALISATION DNA binding                       |
| CA2348 | 1.1 | 0.9 | 1.0 | 1.1 | 1.0 | 1.0 | IPF12811     | 8745975..8 putative serine/threonine kinase                       | orf19.3751 | 12811 | IPF12811     | CLASSIFICATION NOT YET CLEAR-CUT                                  | protein kinase activity                                              |
| CA2349 | 1.0 | 1.0 | 0.9 | 1.0 | 1.0 | 1.1 | IFC3         | complemer Unknown function                                        | orf19.3749 | 12812 | CaIFC3       | TRANSPORT FACILITATION                                            | transporter activity                                                 |
| CA2350 | 0.9 | 1.1 | 1.0 | 1.1 | 1.0 | 0.9 | CWH41.5E     | complemer ER glucosidase I, 5-prime end (by homology)             | orf19.4421 | 15907 | CaCWH41      | C-compound and carbohydrate metabolism                            | CONTROL OF CELLULAR ORGANIZATION SUBCELLULAR LOCALISATION            |
| CA2351 | 1.0 | 1.0 | 1.0 | 1.1 | 1.1 | 0.9 | IPF19947     | 8754287..8 unknown function                                       | orf19.4420 | 19947 | IPF19947     | TRANSCRIPTION SUBCELLULAR LOCALISATION                            | transcription regulator activity                                     |
| CA2352 | 1.1 | 1.0 | 0.9 | 0.9 | 1.0 | 1.0 | FMT1         | 8757080..8 Methionyl-tRNA Transformylase (by homology)            | orf19.4418 | 6482  | CaFMT1       | TRANSCRIPTION SUBCELLULAR LOCALISATION                            | transferase activity                                                 |
| CA2353 | 1.0 | 1.1 | 1.0 | 1.1 | 1.0 | 1.0 | VPS13        | complemer involved in regulating membrane transport               | orf19.4416 | 19756 | CaVPS13      | PROTEIN FATE [folding modification destination]                   | molecular_function unknown                                           |
| CA2354 | 1.0 | 1.0 | 1.0 | 1.0 | 0.9 | 1.0 | IPF18480     | complemer unknown function                                        | orf19.1189 | 18480 | IPF18480     | No significant S.c. match                                         |                                                                      |
| CA2355 | 1.0 | 1.0 | 1.0 | 1.0 | 1.0 | 1.1 | TPK1         | complemer cAMP-dependent protein kinase 2                         | orf19.1235 | 12285 | CaTPK1       | TRANSCRIPTION REGULATION OF/INTERACTION WITH CELLULAR ENVIRONMENT |                                                                      |
| CA2356 | 1.0 | 1.0 | 0.9 | 1.1 | 1.0 | 1.1 | IPF12282     | complemer unknown function                                        | orf19.4893 | 12282 | IPF12282     | No significant S.c. match                                         |                                                                      |
| CA2357 | 0.9 | 1.0 | 1.0 | 1.0 | 1.0 | 1.0 | IPF8957      | complemer unknown function                                        | orf19.4894 | 8957  | IPF8957      | UNCLASSIFIED PROTEINS                                             | molecular_function unknown                                           |
| CA2358 | 0.9 | 0.9 | 1.1 | 0.9 | 0.9 | 1.0 | IPF8953      | complemer unknown function                                        | orf19.4895 | 8953  | IPF8953      | No significant S.c. match                                         |                                                                      |
| CA2359 | 0.9 | 0.9 | 1.0 | 1.1 | 1.1 | 1.1 | IPF8952      | complemer similar to Saccharomyces cerevisiae                     | orf19.4896 | 8952  | IPF8952      | TRANSCRIPTION SUBCELLULAR LOCALISATION                            | nucleotidyltransferase activity                                      |
| CA2360 | 0.9 | 0.9 | 0.9 | 0.9 | 1.0 | 1.0 | IPF8951      | complemer unknown function                                        | orf19.4897 | 8951  | IPF8951      | Lipid fatty-acid and isoprenoid metabolism                        | transporter activity                                                 |
| CA2361 | 1.0 | 1.0 | 0.9 | 0.9 | 1.1 | 1.2 | IPF8950      | complemer unknown function                                        | orf19.1236 | 8950  | IPF8950      | UNCLASSIFIED PROTEINS                                             | molecular_function unknown                                           |
| CA2362 | 1.0 | 1.2 | 1.1 | 1.0 | 1.1 | 0.9 | IPF10595     | 8796680..8 unknown function                                       | orf19.1287 | 10595 | IPF10595     | No significant S.c. match                                         |                                                                      |
| CA2363 | 1.0 | 1.0 | 1.0 | 1.0 | 1.0 | 0.9 | IPF10590     | 8804440..8 unknown function                                       | orf19.1285 | 10590 | IPF10590     | UNCLASSIFIED PROTEINS                                             | molecular_function unknown                                           |
| CA2364 | 1.0 | 1.0 | 1.0 | 1.1 | 1.1 | 1.0 | MEC1         | complemer cell cycle checkpoint protein (by homology)             | orf19.8870 | 19757 | CaMEC1       | CELL CYCLE AND DNA PROCESSING                                     | transferase activity                                                 |
| CA2365 | 1.2 | 1.3 | 1.0 | 1.0 | 1.1 | 1.1 | CKS1         | complemer cyclin-dependent kinases regulator                      | orf19.1282 | 10371 | CaCKS1       | CELL CYCLE AND DNA PROCESSING                                     | enzyme regulator activity                                            |
| CA2366 | 1.0 | 1.1 | 0.9 | 1.0 | 1.0 | 0.9 | IPF10373     | complemer unknown function                                        | orf19.1281 | 10373 | IPF10373     | UNCLASSIFIED PROTEINS                                             | molecular_function unknown                                           |
| CA2367 | 1.1 | 1.2 | 0.8 | 0.8 | 1.2 | 1.0 | SUI1         | complemer translation initiation factor 3 (eIF3)                  | orf19.8867 | 10374 | CaSUI1       | PROTEIN SYNTHESIS SUBCELLULAR LOCALISATION                        | translation regulator activity                                       |
| CA2368 | 0.9 | 1.0 | 1.0 | 1.0 | 1.0 | 1.1 | RPA190       | 8820119..8 DNA-directed RNA polymerase I (by homology)            | orf19.1839 | 10842 | CaRPA190     | TRANSCRIPTION SUBCELLULAR LOCALISATION                            | nucleotidyltransferase activity                                      |
| CA2369 | 1.1 | 1.1 | 1.0 | 1.2 | 1.0 | 1.1 | TBP1         | complemer TATA-binding protein (by homology)                      | orf19.1837 | 10845 | CaTBP1       | TRANSCRIPTION SUBCELLULAR LOCALISATION                            | PF DNA binding                                                       |
| CA2370 | 0.9 | 1.0 | 0.9 | 1.0 | 1.0 | 0.9 | APN2         | complemer AP endonuclease, exonuclease III (by homology)          | orf19.1836 | 10847 | CaAPN2       | CELL CYCLE AND DNA PROCESSING                                     | hydrolase activity                                                   |
| CA2371 | 1.0 | 0.9 | 1.0 | 0.9 | 1.0 | 0.9 | IPF10333     | 8830210..8 unknown function                                       | orf19.1835 | 10333 | IPF10333     | CELL FATE                                                         | protein binding                                                      |
| CA2372 | 1.0 | 1.0 | 1.0 | 1.0 | 0.9 | 1.0 | IPF10335     | 8832527..8 unknown function                                       | orf19.1834 | 10335 | IPF10335     | CELLULAR TRANSPORT AND TRANSPORT MECHANISMS                       | SUBCELLULAR LOCALISATION                                             |
| CA2373 | 1.0 | 1.0 | 1.1 | 1.0 | 1.0 | 1.0 | CBF5         | complemer centromere/ microtubule binding protein                 | orf19.1833 | 10336 | CaCBF5       | CELL CYCLE AND DNA PROCESSING                                     | TRANSCRIPTION CELL FATE lyase activity                               |
| CA2374 | 1.0 | 1.0 | 1.0 | 0.9 | 1.1 | 1.0 | FCY23        | complemer Putative purine-cytosine transport                      | orf19.9390 | 10337 | CaFCY23      | Nucleotide metabolism                                             | TRANSPORT FACILITATION                                               |
| CA2375 | 0.9 | 1.0 | 1.0 | 1.0 | 1.0 | 1.0 | IPF15504     | complemer unknown function                                        | orf19.2211 | 15504 | IPF15504     | UNCLASSIFIED PROTEINS                                             | molecular_function unknown                                           |
| CA2376 | 0.9 | 1.0 | 0.9 | 1.0 | 1.0 | 1.0 | IPF15506     | complemer unknown function                                        | orf19.2213 | 15506 | IPF15506     | UNCLASSIFIED PROTEINS                                             | molecular_function unknown                                           |
| CA2377 | 1.0 | 1.0 | 1.0 | 1.0 | 1.0 | 1.0 | MRPL7        | complemer Ribosomal protein of the large subunit                  | orf19.2214 | 15259 | CaMRPL7      | PROTEIN SYNTHESIS SUBCELLULAR LOCALISATION                        | structural molecule activity                                         |
| CA2378 | 1.1 | 1.0 | 1.0 | 1.0 | 1.0 | 1.0 | GLE1         | 8849231..8 RNA export mediator (by homology)                      | orf19.2215 | 15261 | CaGLE1       | TRANSCRIPTION CELLULAR TRANSPORT AND TRANSPORT MECHANISMS         | molecular_function unknown                                           |
| CA2379 | 1.1 | 1.0 | 1.0 | 1.0 | 1.0 | 1.0 | IPF4073      | complemer similar to Saccharomyces cerevisiae                     | orf19.2216 | 4073  | IPF4073      | CELL CYCLE AND DNA PROCESSING                                     | structural molecule activity                                         |
| CA2380 | 1.0 | 1.0 | 1.0 | 1.0 | 1.1 | 1.0 | IPF4072      | 8855132..8 unknown function                                       | orf19.2217 | 4072  | IPF4072      | No significant S.c. match                                         |                                                                      |
| CA2381 | 1.0 | 0.9 | 1.0 | 1.0 | 1.1 | 1.0 | YCK3.3F      | complemer casein kinase I, 3-prime end (by homology)              | orf19.2221 | 11642 | CaYCK3.3F    | No significant S.c. match                                         |                                                                      |
| CA2383 | 0.9 | 0.9 | 1.0 | 1.1 | 1.1 | 1.0 | IPF18474     | complemer unknown function                                        |            | 18474 | IPF18474     | No significant S.c. match                                         |                                                                      |
| CA2384 | 1.0 | 0.9 | 1.1 | 1.1 | 1.0 | 1.1 | MDL1         | complemer ATP-DEPENDENT PE yeast MDL                              | orf19.2615 | 7801  | CaMDL1       | TRANSPORT FACILITATION                                            | transporter activity                                                 |
| CA2385 | 1.0 | 1.0 | 1.0 | 1.0 | 1.1 | 1.2 | RSR1.3       | complemer GTP-binding protein, 3 Rsr1p [Canor]                    | orf19.2614 | 8507  | CaRSR1.3     | CELL FATE SUBCELLULAR LOCALISATION                                | signal transducer activity                                           |
| CA2386 | 1.1 | 1.2 | 1.2 | 1.2 | 1.1 | 1.0 | ECM41.3      | complemer involved in cell wall biogenesis and                    | orf19.2613 | 8505  | CaECM41.3    | CONTROL OF CELLULAR ORGANIZATION                                  | molecular_function unknown                                           |

|        |     |     |     |     |     |     |              |                                                    |             |            |            |                                                                        |                                  |  |
|--------|-----|-----|-----|-----|-----|-----|--------------|----------------------------------------------------|-------------|------------|------------|------------------------------------------------------------------------|----------------------------------|--|
| CA2387 | 1.0 | 0.9 | 1.0 | 0.9 | 0.9 | 1.0 | IPF8504      | 8879599..8 unknown function                        | orf19.2612  | 8504       | IPF8504    | TRANSCRIPTION SUBCELLULAR LOCALISATION                                 |                                  |  |
| CA2388 | 0.9 | 1.0 | 1.0 | 0.9 | 1.0 | 1.0 | MCM6         | complemer component of MCM initiator compl         | orf19.2611  | 8502       | CaMCM6     | CELL CYCLE AND DNA PROCESSING SUBCELLULAR LOCALISATIO                  | DNA binding                      |  |
| CA2389 | 1.0 | 1.0 | 1.1 | 1.0 | 0.9 | 1.1 | IPF8500      | 8883552..8 unknown function                        | orf19.2610  | 8500       | IPF8500    | TRANSCRIPTION SUBCELLULAR LOCALISATION                                 |                                  |  |
| CA2390 | 1.0 | 0.9 | 1.0 | 0.9 | 0.9 | 1.0 | CET1         | 8884285..8 mRNA 5 -triphosphata:#NOM?              | orf19.2609  | 8499       | CaCET1     | TRANSCRIPTION                                                          | hydrolase activity               |  |
| CA2391 | 0.8 | 0.6 | 1.0 | 0.9 | 1.2 | 1.0 | ADH5         | 8887692..8 probable alcohol dehydrogenase (        | orf19.2608  | 15671      | CaADH5     | C-compound and carbohydrate metabolism ENERGY SUBCELLULAR LOCALISATION |                                  |  |
| CA2392 | 1.0 | 1.0 | 1.0 | 0.9 | 0.9 | 1.0 | IPF15672     | complemer unknown function                         | orf19.1013  | 15672      | IPF15672   | ENERGY                                                                 |                                  |  |
| CA2393 | 1.0 | 1.0 | 0.9 | 0.9 | 1.1 | 1.1 | RHO3         | complemer GTP-binding protein of the rho fam       | orf19.1101  | 6422       | CaRHO3     | CELL FATE                                                              | signal transducer activity       |  |
| CA2394 | 1.0 | 1.0 | 1.0 | 0.9 | 1.0 | 1.1 | IPF6424      | complemer unknown function                         | orf19.1101  | 6424       | IPF6424    | UNCLASSIFIED PROTEINS                                                  |                                  |  |
| CA2395 | 1.1 | 1.0 | 1.0 | 1.0 | 1.0 | 0.9 | IPF6425      | complemer unknown function                         | orf19.3536  | 6425       | IPF6425    | UNCLASSIFIED PROTEINS                                                  | transferase activity             |  |
| CA2396 | 0.9 | 1.0 | 1.1 | 0.9 | 0.9 | 1.0 | IPF6428      | complemer unknown function                         | orf19.3537  | 6428       | IPF6428    | UNCLASSIFIED PROTEINS                                                  | molecular_function unknown       |  |
| CA2397 | 1.0 | 1.0 | 1.1 | 1.0 | 0.9 | 1.0 | CFL12        | 8896757..8 Strong similarity to ferric reductase   | orf19.3538  | 6430       | CaCFL12    | REGULATION OF/INTERACTION WITH CELLULAR ENVIRONMENT                    | Other virulence attributes       |  |
| CA2398 | 1.0 | 1.0 | 1.1 | 1.0 | 0.9 | 1.0 | IPF6431      | complemer unknown function                         | orf19.3539  | 6431       | IPF6431    | UNCLASSIFIED PROTEINS                                                  | molecular_function unknown       |  |
| CA2399 | 0.9 | 1.2 | 0.9 | 1.0 | 1.0 | 0.9 | MAK5         | 8900492..8 ATP-dependent RNA helicase (by          | orf19.3540  | 6433       | CaMAK5     | TRANSCRIPTION SUBCELLULAR LOCALISATION                                 | RNA binding,helicase activity    |  |
| CA2400 | 1.1 | 1.1 | 1.1 | 0.9 | 1.0 | 1.0 | SUP45        | complemer Translational release factor (by ho      | orf19.3541  | 6434       | CaSUP45    | PROTEIN SYNTHESIS SUBCELLULAR LOCALISATION                             | translation regulator activity   |  |
| CA2401 | 1.1 | 1.2 | 1.1 | 1.0 | 1.0 | 1.1 | LEM3         | 8904584..8 cell division cycle mutant (by hom      | orf19.3542  | 6435       | CaLEM3     | UNCLASSIFIED PROTEINS                                                  | transcription regulator activity |  |
| CA2402 | 1.1 | 1.1 | 1.0 | 1.0 | 1.0 | 1.0 | IPF6437      | complemer unknown function                         | orf19.3543  | 6437       | IPF6437    | No significant S.c. match                                              |                                  |  |
| CA2403 | 1.0 | 1.2 | 1.0 | 1.0 | 1.0 | 0.9 | IPF6438      | 8906519..8 unknown function                        | orf19.3544  | 6438       | IPF6438    | Lipid fatty-acid and isoprenoid metabolism                             | molecular_function unknown       |  |
| CA2405 | 1.0 | 1.1 | 1.0 | 1.0 | 1.0 | 1.0 | IPF3844      | 8915133..8 unknown function                        | orf19.301   | 3844       | IPF3844    | No significant S.c. match                                              |                                  |  |
| CA2406 | 1.0 | 1.0 | 1.0 | 1.0 | 1.1 | 0.9 | AIP2         | complemer actin interacting protein 2 (by hom      | orf19.300   | 3840       | CaAIP2     | SUBCELLULAR LOCALISATION                                               | oxidoreductase activity          |  |
| CA2407 | 1.0 | 1.1 | 1.1 | 1.1 | 1.1 | 1.1 | ECM14        | 8920404..8 carboxypeptidase involved in cell       | orf19.299   | 3838       | CaECM14    | CONTROL OF CELLULAR ORGANIZATION                                       | molecular_function unknown       |  |
| CA2408 | 1.0 | 1.0 | 1.0 | 0.9 | 1.0 | 1.1 | IPF3833      | complemer unknown function                         | orf19.296   | 3833       | IPF3833    | No significant S.c. match                                              |                                  |  |
| CA2409 | 1.0 | 1.1 | 1.0 | 1.0 | 1.0 | 1.0 | IPF19948     | 8925564..8 unknown function                        | orf19.291   | 19948      | IPF19948   | UNCLASSIFIED PROTEINS                                                  | molecular_function unknown       |  |
| CA2411 | 1.0 | 1.0 | 1.0 | 1.0 | 0.9 | 1.0 | IFI3.3       | complemer Unknown function, 3-prime end            | orf19.4483  | 17915      | CaIFI3.3   | CLASSIFICATION NOT YET CLEAR-CUT                                       |                                  |  |
| CA2412 | 1.0 | 1.0 | 1.0 | 0.9 | 1.0 | 0.9 | IPF13755     | 8932229..8 unknown function                        | orf19.4481  | 13755      | IPF13755   | No significant S.c. match                                              |                                  |  |
| CA2413 | 1.1 | 1.1 | 1.0 | 1.0 | 1.2 | 1.0 | IPF13756.5F  | 8933487..8 unknown function, 5-prime end           | orf19.4480  | 13756      | IPF13756.5 | UNCLASSIFIED PROTEINS                                                  |                                  |  |
| CA2414 | 1.1 | 1.1 | 1.1 | 1.0 | 1.0 | 1.0 | IPF13756.3F  | 8934104..8 unknown function, 3-prime end           | orf19.4479  | 13757      | IPF13756.3 | UNCLASSIFIED PROTEINS                                                  | molecular_function unknown       |  |
| CA2415 | 1.0 | 1.0 | 1.1 | 1.0 | 1.0 | 1.0 | MSD1         | complemer Aspartyl-tRNA synthetase, mitochr        | orf19.4478  | 17203      | CaMSD1     | PROTEIN SYNTHESIS SUBCELLULAR LOCALISATION                             | ligase activity                  |  |
| CA2416 | 1.1 | 1.1 | 2.4 | 3.0 | 1.3 | 2.0 | IFD4         | 8938685..8 Putative aryl-alcohol dehydrogena       | orf19.4477  | 14374      | CaIFD4     | C-compound and carbohydrate metabolism ENERGY                          |                                  |  |
| CA2418 | 1.0 | 1.0 | 1.0 | 1.0 | 1.1 | 1.0 | MNT4         | 8942665..8 putative mannosyltransferase            | orf19.4475  | 14377      | CaMNT4     | C-compound and carbohydrate metabolism ""PROTEIN FATE [folding m       | transferase activity             |  |
| CA2419 | 1.0 | 1.0 | 1.0 | 0.9 | 1.0 | 0.9 | IPF14379     | complemer unknown function                         | orf19.4474  | 14379      | IPF14379   | UNCLASSIFIED PROTEINS                                                  | molecular_function unknown       |  |
| CA2420 | 0.9 | 1.1 | 1.0 | 1.0 | 1.1 | 1.1 | SPC19        | complemer spindle pole body protein (by hom        | orf19.4473  | 15002      | CaSPC19    | SUBCELLULAR LOCALISATION                                               | structural molecule activity     |  |
| CA2421 | 1.0 | 1.0 | 1.0 | 1.0 | 1.0 | 1.0 | IPF14998     | 8947627..8 unknown function                        | orf19.4471  | 14998      | IPF14998   | UNCLASSIFIED PROTEINS                                                  | molecular_function unknown       |  |
| CA2422 | 0.9 | 0.9 | 1.0 | 1.0 | 1.1 | 1.0 | IPF14997     | 8950699..8 unknown function                        | orf19.1195  | 14997      | IPF14997   | No significant S.c. match                                              |                                  |  |
| CA2423 | 1.0 | 1.0 | 1.0 | 1.0 | 0.9 | 1.0 | SDH41        | complemer succinate dehydrogenase membr            | orf19.1194  | 19574      | CaSDH41    | C-compound and carbohydrate metabolism ENERGY SUBCELLULAR L            | oxidoreductase activity          |  |
| CA2424 | 1.1 | 1.0 | 1.1 | 1.0 | 1.0 | 1.0 | IPF18468     | complemer unknown function                         | orf19.1194  | 18468      | IPF18468   | No significant S.c. match                                              |                                  |  |
| CA2425 | 1.0 | 1.1 | 1.1 | 0.9 | 1.0 | 1.0 | IPF9907      | 8956615..8 similar to Saccharomyces cerevisi       | orf19.1091  | 9907       | IPF9907    | CELLULAR TRANSPORT AND TRANSPORT MECHANISMS SUBCELL                    | molecular_function unknown       |  |
| CA2426 | 0.9 | 1.0 | 1.1 | 1.0 | 1.0 | 1.1 | IPF9901      | 8959480..8 similar to Saccharomyzinc finger        | orf19.3407  | 9901       | IPF9901    | CELL CYCLE AND DNA PROCESSING ""PROTEIN FATE [folding modifi           | DNA binding                      |  |
| CA2427 | 1.0 | 1.0 | 1.1 | 1.1 | 1.0 | 1.0 | IPF9898      | complemer probable formate dehy transporter        | orf19.3406  | 9898       | IPF9898    | ENERGY                                                                 | transporter activity             |  |
| CA2428 | 1.0 | 1.0 | 1.0 | 1.1 | 1.0 | 0.9 | IPF9894.3    | complemer unknown function, 3-pr possible zir      | orf19.3405  | 9894       | IPF9894.3  | No significant S.c. match                                              |                                  |  |
| CA2429 | 0.9 | 0.9 | 1.0 | 0.9 | 1.0 | 1.0 | IPF9890      | 8965711..8 unknown function                        | hypothetica | orf19.3404 | 9890       | IPF9890                                                                | UNCLASSIFIED PROTEINS            |  |
| CA2430 | 1.0 | 1.0 | 1.0 | 1.0 | 1.0 | 0.9 | IPF12950     | complemer unknown function                         | hypothetica | orf19.3402 | 12950      | IPF12950                                                               | No significant S.c. match        |  |
| CA2431 | 1.0 | 1.0 | 1.0 | 0.9 | 1.0 | 1.1 | IPF12951     | 8968605..8 unknown function                        | orf19.3401  | 12951      | IPF12951   | UNCLASSIFIED PROTEINS                                                  | molecular_function unknown       |  |
| CA2432 | 0.9 | 1.0 | 1.0 | 1.0 | 1.0 | 1.0 | COQ3         | complemer 3,4-dihydroxy-5-hexaprenylbenzo          | orf19.3400  | 12953      | CaCOQ3     | Metabolism of vitamins cofactors and prosthetic groups ""SUBCELLULA    | transferase activity             |  |
| CA2433 | 0.9 | 1.0 | 1.0 | 1.0 | 1.0 | 0.9 | IPF12959     | 8970442..8 unknown function                        | orf19.3399  | 12959      | IPF12959   | UNCLASSIFIED PROTEINS                                                  | molecular_function unknown       |  |
| CA2434 | 1.0 | 1.0 | 0.8 | 0.6 | 0.9 | 1.0 | IPF9484      | complemer unknown function                         | conserved   | orf19.3396 | 9484       | IPF9484                                                                | UNCLASSIFIED PROTEINS            |  |
| CA2435 | 1.0 | 1.0 | 1.0 | 1.0 | 0.9 | 0.9 | IPF9483      | complemer probable permease (by hypothetica        | orf19.1089  | 9483       | IPF9483    | CELL RESCUE DEFENSE AND VIRULENCE ""TRANSPORT FACILITA                 | transporter activity             |  |
| CA2436 | 1.0 | 1.0 | 1.0 | 1.1 | 1.0 | 1.0 | IPF5500      | 8979991..8 unknown function                        | orf19.2200  | 5500       | IPF5500    | UNCLASSIFIED PROTEINS                                                  | molecular_function unknown       |  |
| CA2437 | 1.1 | 1.0 | 0.9 | 1.0 | 1.0 | 1.0 | PHO86        | complemer inorganic phosphate transporter by       | orf19.2199  | 5501       | CaPHO86    | Phosphate metabolism REGULATION OF/INTERACTION WITH CELLUI             | molecular_function unknown       |  |
| CA2438 | 1.0 | 1.0 | 1.0 | 1.0 | 1.0 | 1.0 | IPF5505      | 8983829..8 unknown function                        | orf19.2198  | 5505       | IPF5505    | UNCLASSIFIED PROTEINS                                                  |                                  |  |
| CA2439 | 1.0 | 1.1 | 1.0 | 1.0 | 1.0 | 1.0 | IPF7514      | 8986955..8 unknown function                        | orf19.2197  | 7514       | IPF7514    | Nitrogen and sulphur metabolism                                        |                                  |  |
| CA2440 | 1.0 | 1.0 | 0.9 | 1.0 | 1.1 | 1.0 | IPF7513      | 8989114..8 unknown function                        | orf19.2196  | 7513       | IPF7513    | UNCLASSIFIED PROTEINS                                                  | molecular_function unknown       |  |
| CA2441 | 1.0 | 1.0 | 1.0 | 1.0 | 0.9 | 1.0 | APM4         | 8990760..8 AP-2 complex subunit, mu2 subun         | orf19.2194  | 7509       | CaAPM4     | PROTEIN FATE [folding modification destination] ""CELLULAR TRANSP      | molecular_function unknown       |  |
| CA2442 | 1.0 | 1.0 | 1.0 | 1.0 | 1.0 | 1.0 | PR55         | 8992474..8 Phosphoribosylpyrophosphate syn         | orf19.2193  | 7507       | CaPR55     | Amino acid metabolism Nucleotide metabolism Purine ribonucleotide m    | transferase activity             |  |
| CA2443 |     |     |     |     |     |     | YAF9         | 8997489..8998253                                   |             |            |            |                                                                        |                                  |  |
| CA2444 | 0.9 | 1.0 | 1.0 | 1.1 | 0.9 | 1.1 | IPF13883     | complemer Unknown function                         | orf19.5502  | 13883      | IPF13883   | No significant S.c. match                                              |                                  |  |
| CA2445 | 2.6 | 1.0 | 1.0 | 0.9 | 1.0 | 1.0 | IPF13885     | 8999951..9 unknown function                        | orf19.5503  | 13885      | IPF13885   | No significant S.c. match                                              |                                  |  |
| CA2446 | 0.9 | 1.1 | 1.0 | 1.1 | 1.0 | 0.9 | IPF2582      | 9002148..9 unknown function                        | orf19.5504  | 2582       | IPF2582    | UNCLASSIFIED PROTEINS                                                  | molecular_function unknown       |  |
| CA2447 | 1.0 | 1.0 | 1.0 | 1.0 | 1.0 | 1.0 | HIS7         | 9005393..9 Histidine biosynthesis imidazole        | gorf19.5505 | 2583       | CaHIS7     | Amino acid metabolism                                                  | transferase activity             |  |
| CA2448 | 0.9 | 1.0 | 1.1 | 1.1 | 1.1 | 1.1 | PLC1         | 9007674..9 1-phosphatidylinositol- phospholip      | orf19.5506  | 2586       | CaPLC1     | Lipid fatty-acid and isoprenoid metabolism ""CELL CYCLE AND DNA PR     | hydrolase activity               |  |
| CA2449 | 1.0 | 0.9 | 1.0 | 1.0 | 1.0 | 1.1 | ENP1         | 9011266..9 Essential nuclear protein (by hom       | orf19.5507  | 2587       | CaENP1     | PROTEIN FATE [folding modification destination] ""SUBCELLULAR LOC      | RNA binding                      |  |
| CA2450 | 0.9 | 1.0 | 1.0 | 1.0 | 1.0 | 1.0 | IPF2589      | complemer unknown function                         | orf19.5508  | 2589       | IPF2589    | UNCLASSIFIED PROTEINS                                                  |                                  |  |
| CA2451 | 1.0 | 1.0 | 1.0 | 1.1 | 1.0 | 1.0 | IFB2         | complemer unknown function                         | orf19.5509  | 6648       | CaIFB2     | TRANSPORT FACILITATION                                                 |                                  |  |
| CA2452 | 1.0 | 1.0 | 1.0 | 1.0 | 1.0 | 1.1 | IPF9955      | complemer unknown function                         | orf19.1099  | 9955       | IPF9955    | No significant S.c. match                                              |                                  |  |
| CA2453 | 1.0 | 1.0 | 1.0 | 1.0 | 1.0 | 1.0 | IPF9950      | 9026533..9 unknown function                        | orf19.1099  | 9950       | IPF9950    | UNCLASSIFIED PROTEINS                                                  | molecular_function unknown       |  |
| CA2454 | 1.0 | 1.1 | 0.8 | 0.9 | 0.8 | 1.1 | RPL23B.3     | 9030804..9 ribosomal protein L23.e, 3-prime e      | orf19.3504  | 9946       | CaRPL23B   | PROTEIN SYNTHESIS SUBCELLULAR LOCALISATION                             | structural molecule activity     |  |
| CA2455 | 1.0 | 0.8 | 0.9 | 1.1 | 1.0 | 1.0 | IPF12228     | complemer unknown function                         | orf19.3505  | 12228      | IPF12228   | UNCLASSIFIED PROTEINS                                                  | molecular_function unknown       |  |
| CA2456 | 1.0 | 1.0 | 1.0 | 1.1 | 1.0 | 1.1 | DBR1         | complemer lariat-debranching enzyme (by hor        | orf19.3506  | 12230      | CaDBR1     | Nucleotide metabolism CELL FATE SUBCELLULAR LOCALISATION               | RNA binding                      |  |
| CA2457 | 1.0 | 1.0 | 1.0 | 1.1 | 1.0 | 1.1 | MCR1         | complemer NADH-cytochrome-b5 reductase (           | orf19.3507  | 12231      | CaMCR1     | ENERGY SUBCELLULAR LOCALISATION                                        | transporter activity             |  |
| CA2458 | 0.9 | 1.0 | 0.9 | 1.0 | 1.0 | 1.0 | IPF12233     | 9038767..9 unknown function                        | orf19.3508  | 12233      | IPF12233   | UNCLASSIFIED PROTEINS                                                  | molecular_function unknown       |  |
| CA2459 | 0.9 | 1.0 | 1.0 | 1.1 | 1.0 | 1.0 | IPF12234.5EC | 9040121..9 unknown function, 5-prime end           | orf19.3509  | 12234      | IPF12234.5 | No significant S.c. match                                              |                                  |  |
| CA2460 | 1.0 | 1.0 | 1.0 | 1.0 | 1.0 | 1.0 | LYS1.3EOC    | 9040950..9 Saccharopine dehydrogenase, 3-prime end |             | 18465      | CaLYS1.3e  | Amino acid metabolism SUBCELLULAR LOCALISATION                         |                                  |  |
| CA2461 | 1.0 | 1.0 | 1.0 | 1.1 | 1.0 | 1.0 | MAK11        | complemer involved in cell growth and replicat     | orf19.1791  | 8738       | CaMAK11    | CELL FATE                                                              | molecular_function unknown       |  |

|        |     |     |     |     |     |     |              |                                                       |                        |       |            |                                                                                               |                                    |
|--------|-----|-----|-----|-----|-----|-----|--------------|-------------------------------------------------------|------------------------|-------|------------|-----------------------------------------------------------------------------------------------|------------------------------------|
| CA2462 | 1.0 | 1.0 | 1.0 | 1.0 | 1.0 | 0.9 | CDC16        | 9042988..9subunit of anaphase-promoting co            | orf19.1792             | 8736  | CaCDC16    | CELL CYCLE AND DNA PROCESSING ""PROTEIN FATE [folding modif                                   | protein binding                    |
| CA2463 | 1.0 | 1.1 | 0.9 | 1.0 | 0.9 | 0.9 | IPF8730      | 9048173..9 unknown function                           | orf19.1793             | 8730  | IPF8730    | UNCLASSIFIED PROTEINS                                                                         | molecular_function unknown         |
| CA2464 | 1.0 | 1.0 | 1.0 | 1.0 | 0.9 | 1.1 | IPF8727      | complemer unknown function                            | orf19.1794             | 8727  | IPF8727    | No significant S.c. match                                                                     |                                    |
| CA2465 | 1.0 | 1.0 | 1.1 | 1.0 | 0.9 | 1.0 | IPF8726      | 9052094..9 unknown function                           | orf19.1795             | 8726  | IPF8726    | Nucleotide metabolism                                                                         | RNA binding                        |
| CA2466 | 1.0 | 1.0 | 1.0 | 1.0 | 1.0 | 1.0 | IPF8725      | complemer unknown function                            |                        | 8725  | IPF8725    | No significant S.c. match                                                                     |                                    |
| CA2467 | 1.1 | 1.0 | 1.0 | 1.0 | 1.1 | 1.1 | IPF8724      | 9055895..9 unknown function                           | orf19.1796             | 8724  | IPF8724    | C-compound and carbohydrate metabolism                                                        | oxidoreductase activity            |
| CA2468 | 1.0 | 1.0 | 1.0 | 1.1 | 1.0 | 1.0 | IPF8723      | complemer unknown function                            | orf19.1797             | 8723  | IPF8723    | No significant S.c. match                                                                     |                                    |
| CA2469 | 1.0 | 1.0 | 1.0 | 1.0 | 1.0 | 1.0 | IPF7393      | complemer unknown function                            | orf19.9364             | 7393  | IPF7393    | UNCLASSIFIED PROTEINS                                                                         |                                    |
| CA2470 | 1.0 | 1.0 | 1.0 | 1.0 | 1.0 | 1.0 | SDH12        | 9069926..9 Succinate dehydrogenase (by hom            | orf19.1038             | 3247  | CaSDH12    | C-compound and carbohydrate metabolism ENERGY SUBCELLULAR LOCALISATION                        |                                    |
| CA2471 | 1.0 | 0.9 | 1.0 | 1.0 | 1.1 | 1.0 | TOP2         | complemer Topoisomerase II                            | topoisomer orf19.2873  | 3245  | CaTOP2     | CELL CYCLE AND DNA PROCESSING SUBCELLULAR LOCALISATION isomerase activity                     |                                    |
| CA2472 | 1.0 | 1.0 | 1.0 | 1.0 | 0.9 | 1.0 | IPF3239      | complemer unknown function                            | orf19.2875             | 3239  | IPF3239    | PROTEIN FATE [folding modification destination] ""CELLULAR TRANSPORT AND TRANSPORT MECHAN     |                                    |
| CA2473 | 1.0 | 1.0 | 1.1 | 1.1 | 1.1 | 1.1 | CBF1         | complemer putative centromere bi putative ce          | orf19.2876             | 3238  | CaCBF1     | Amino acid metabolism Nitrogen and sulphur metabolism CELL CYCLE DNA binding                  |                                    |
| CA2474 | 1.1 | 0.6 | 2.9 | 4.0 | 2.3 | 3.5 | PDC11        | 9080267..9 Pyruvate decarboxylase (by homo            | orf19.2877             | 3234  | CaPDC11    | C-compound and carbohydrate metabolism ENERGY SUBCELLULAR LOCALISATION                        |                                    |
| CA2475 | 1.0 | 1.0 | 1.0 | 1.0 | 1.0 | 1.0 | IPF3233      | complemer unknown function                            | orf19.2878             | 3233  | IPF3233    | No significant S.c. match                                                                     |                                    |
| CA2476 | 0.9 | 0.9 | 1.0 | 1.0 | 1.0 | 1.1 | IFF5         | 9085007..9 unknown function                           | orf19.1039             | 15521 | CaIFF5     | C-compound and carbohydrate metabolism SUBCELLULAR LOCALISATION                               |                                    |
| CA2477 | 0.9 | 1.0 | 1.0 | 1.1 | 1.0 | 1.0 | IPF16016     | complemer unknown function                            | Mnn4p [Ca orf19.1039]  | 16016 | IPF16016   | UNCLASSIFIED PROTEINS                                                                         |                                    |
| CA2478 | 0.9 | 1.0 | 1.0 | 1.1 | 0.9 | 1.0 | DAL52        | 9098997..9 allantoate permease (by homology           | orf19.3208             | 14177 | CaDAL52    | CELLULAR TRANSPORT AND TRANSPORT MECHANISMS SUBCELLULAR LOCALISATION TRANSP                   |                                    |
| CA2479 | 0.9 | 0.9 | 1.0 | 1.0 | 1.0 | 0.9 | CCN1         | complemer G1 cyclin                                   | orf19.3207             | 15597 | CaCCN1     | CELL CYCLE AND DNA PROCESSING ""CELL RESCUE DEFENSE AND VIRULENCE ""CELL FATE SUE             |                                    |
| CA2480 | 1.0 | 1.0 | 1.1 | 1.1 | 1.1 | 1.1 | CCT7         | complemer component of chaperonin-containi            | orf19.1071             | 9837  | CaCCT7     | PROTEIN FATE [folding modification destination] ""SUBCELLULAR LOCALISATION chaperone activity |                                    |
| CA2481 | 1.1 | 1.2 | 1.0 | 1.1 | 1.0 | 1.0 | MRPL36       | 9107958..9 ribosomal protein YmL36 precursor          | orf19.3205             | 9838  | CaMRPL36   | PROTEIN SYNTHESIS SUBCELLULAR LOCALISATION                                                    | structural molecule activity       |
| CA2482 | 1.1 | 1.1 | 1.0 | 1.1 | 1.0 | 1.0 | IPF9841      | complemer unknown function                            | orf19.3204             | 9841  | IPF9841    | CELL CYCLE AND DNA PROCESSING CONTROL OF CELLULAR ORGANIZATION SUBCELLULAR LO                 |                                    |
| CA2483 | 1.0 | 1.1 | 1.0 | 1.0 | 1.0 | 0.9 | IPF19758     | complemer unknown function                            | orf19.3203             | 19758 | IPF19758   | UNCLASSIFIED PROTEINS                                                                         | protein binding                    |
| CA2484 | 1.0 | 1.1 | 1.0 | 1.1 | 1.0 | 0.9 | IPF9846      | 9114239..9 unknown function                           | orf19.1071             | 9846  | IPF9846    | UNCLASSIFIED PROTEINS                                                                         |                                    |
| CA2485 | 1.0 | 1.1 | 1.0 | 1.0 | 1.0 | 1.1 | PAP12        | 9117478..9 poly(A) polymerase                         | poly A poly orf19.1071 | 8850  | CaPAP12    | TRANSCRIPTION SUBCELLULAR LOCALISATION                                                        |                                    |
| CA2486 | 1.2 | 1.1 | 1.0 | 0.9 | 1.1 | 1.0 | IPF9851      | complemer unknown function                            | unknown [C orf19.1071] | 9851  | IPF9851    | TRANSCRIPTION CELL FATE SUBCELLULAR LOCALISATION                                              | transcription regulator activity   |
| CA2487 | 1.0 | 1.0 | 1.1 | 1.0 | 1.0 | 0.9 | PIK1         | complemer phosphatidylinositol 4-l                    | unknown [C orf19.1071] | 9853  | CaPIK1     | Lipid fatty-acid and isoprenoid metabolism ""CELL CYCLE AND DNA PR transferase activity       |                                    |
| CA2488 | 1.0 | 1.1 | 1.0 | 1.0 | 1.1 | 1.0 | IPF17706     | 9125155..9 Unknown function                           | unknown [C orf19.1070] | 17706 | IPF17706   | No significant S.c. match                                                                     |                                    |
| CA2489 | 1.0 | 1.2 | 1.1 | 1.0 | 1.0 | 1.1 | IPF7217      | complemer unknown function                            | orf19.1152             | 7217  | IPF7217    | TRANSCRIPTION                                                                                 |                                    |
| CA2490 | 0.9 | 1.0 | 1.0 | 1.2 | 1.1 | 1.1 | MUM2         | complemer ubiquitin C-terminal hydrolase (by          | orf19.4044             | 7220  | CaMUM2     | CELL CYCLE AND DNA PROCESSING CELL FATE                                                       | molecular_function unknown         |
| CA2491 | 1.0 | 1.0 | 1.0 | 1.0 | 1.0 | 1.0 | IPF7221      | complemer unknown function                            | orf19.4046             | 7221  | IPF7221    | No significant S.c. match                                                                     |                                    |
| CA2492 | 1.0 | 1.0 | 1.0 | 1.0 | 1.0 | 0.9 | IPF7224      | 9132913..9 putative telomere elongation prote         | orf19.4045             | 7224  | IPF7224    | CELL CYCLE AND DNA PROCESSING                                                                 | molecular_function unknown         |
| CA2493 | 0.9 | 0.9 | 1.0 | 1.0 | 1.0 | 1.0 | IPF7227      | 9134845..9 putative fatty acid desaturase (by         | lorf19.4048            | 7227  | IPF7227    | Lipid fatty-acid and isoprenoid metabolism """"CELL RESCUE DEFENSE AND VIRULENCE ""REGULATIO  |                                    |
| CA2494 | 1.1 | 1.0 | 1.1 | 1.0 | 1.0 | 0.9 | HTS1         | complemer histidine tRNA synthetase (by hom           | orf19.4051             | 7230  | CaHTS1     | PROTEIN SYNTHESIS SUBCELLULAR LOCALISATION                                                    | ligase activity                    |
| CA2495 | 1.0 | 1.0 | 1.0 | 1.1 | 1.0 | 1.0 | CTA24        | complemer transcriptional regulation (by hom          | orf19.4054             | 7233  | CaCTA24    | No significant S.c. match                                                                     |                                    |
| CA2496 | 1.0 | 1.1 | 1.0 | 1.1 | 1.1 | 1.1 | IPF3468      | complemer unknown function                            | orf19.4055             | 3468  | IPF3468    | No significant S.c. match                                                                     |                                    |
| CA2497 | 1.1 | 1.0 | 1.1 | 1.0 | 1.0 | 1.1 | TEL1.3EOC    | 9147927..9 Putative phosphatidylinositol kinas        | orf19.5580             | 15888 | CaTEL1.3e  | Lipid fatty-acid and isoprenoid metabolism ""CELL CYCLE AND DNA PR transferase activity       |                                    |
| CA2498 | 0.9 | 1.1 | 1.0 | 1.1 | 1.0 | 1.1 | VPS181       | 9153846..9 vacuolar membrane pr Vps18 prot            | orf19.5584             | 19951 | CaVPS181   | PROTEIN FATE [folding modification destination] ""CELLULAR TRANSP                             | protein binding                    |
| CA2499 | 1.0 | 1.0 | 1.1 | 0.9 | 1.0 | 1.0 | SAP5         | 9158571..9 secreted aspartyl prote                    | orf19.5585             | 6816  | CaSAP5     | PROTEIN FATE [folding modification destination] ""Other virulence attributes                  |                                    |
| CA2500 | 1.3 | 1.0 | 1.0 | 1.0 | 1.0 | 0.9 | FIG4         | complemer suppressor of sac1 mutation (by ho          | orf19.5586             | 6814  | CaFIG4     | CELLULAR TRANSPORT AND TRANSPORT MECHANISMS REGULA                                            | hydrolase activity                 |
| CA2501 | 0.9 | 0.9 | 0.9 | 1.0 | 0.9 | 1.0 | IPF6812      | complemer unknown function                            | orf19.5587             | 6812  | IPF6812    | UNCLASSIFIED PROTEINS                                                                         | protein binding                    |
| CA2502 | 1.0 | 1.0 | 1.1 | 1.0 | 1.0 | 1.0 | IPF20103     | 9166929..9 unknown function                           | orf19.5588             | 20103 | IPF20103   | No significant S.c. match                                                                     |                                    |
| CA2503 | 0.9 | 1.0 | 1.0 | 1.0 | 0.9 | 1.0 | IPF6803.5F   | 9171868..9 unknown function, 5-prime end              | orf19.5592             | 6803  | IPF6803.5f | UNCLASSIFIED PROTEINS                                                                         |                                    |
| CA2504 | 1.1 | 1.1 | 1.0 | 1.0 | 1.0 | 1.0 | IPF6803.3F   | 9173034..9 unknown function, 3-prime end              | orf19.5593             | 6801  | IPF6803.3f | No significant S.c. match                                                                     |                                    |
| CA2505 | 0.9 | 1.0 | 1.0 | 1.1 | 1.1 | 1.0 | IPF6796      | 9175569..9 unknown function                           | orf19.5595             | 6796  | IPF6796    | CELL FATE SUBCELLULAR LOCALISATION                                                            | RNA binding                        |
| CA2506 | 1.0 | 0.9 | 1.0 | 1.1 | 1.0 | 1.0 | IPF6794      | complemer unknown function                            | orf19.5596             | 6794  | IPF6794    | TRANSCRIPTION                                                                                 |                                    |
| CA2507 | 1.0 | 1.0 | 1.1 | 1.0 | 1.0 | 1.0 | IPF18459.3EC | 9179867..9 aldehyde dehydrogenase, 3-prime end (by ho | orf19.5597             | 18459 | IPF18459.3 | CLASSIFICATION NOT YET CLEAR-CUT                                                              |                                    |
| CA2508 | 0.9 | 1.0 | 1.0 | 1.1 | 1.0 | 1.1 | BET5         | 9181124..9 targeting and fusion of ER to Golg         | orf19.302              | 1468  | CaBET5     | CELLULAR TRANSPORT AND TRANSPORT MECHANISMS SUBCELL                                           | molecular_function unknown         |
| CA2509 | 0.9 | 1.0 | 1.0 | 1.0 | 1.1 | 1.0 | IPF1471      | 9182324..9 aminotriazole resistance protein (bo       | orf19.304              | 1471  | IPF1471    | CELL RESCUE DEFENSE AND VIRULENCE ""TRANSPORT FACILITA                                        | molecular_function unknown         |
| CA2510 | 1.0 | 1.0 | 0.9 | 1.2 | 1.0 | 1.0 | IPF1472      | 9184056..9 unknown function                           | orf19.305              | 1472  | IPF1472    | TRANSPORT FACILITATION                                                                        |                                    |
| CA2511 | 0.9 | 1.0 | 1.0 | 1.0 | 0.9 | 0.9 | IPF1474      | 9185635..9 myosin-like protein                        | orf19.306              | 1474  | IPF1474    | CELLULAR TRANSPORT AND TRANSPORT MECHANISMS SUBCELLULAR LOCALISATION                          |                                    |
| CA2512 | 1.0 | 1.0 | 1.0 | 1.0 | 1.0 | 0.9 | HF11         | complemer Putative transcriptional coactivator        | orf19.307              | 1476  | CaHF11     | TRANSCRIPTION SUBCELLULAR LOCALISATION                                                        | transcription regulator activity   |
| CA2513 | 1.0 | 0.9 | 1.1 | 1.0 | 0.9 | 1.0 | SNG1         | 9190417..9 Involved in nitroguanidine resistan        | orf19.308              | 1478  | CaSNG1     | CELL RESCUE DEFENSE AND VIRULENCE ""TRANSPORT FACILITA                                        | molecular_function unknown         |
| CA2514 | 1.1 | 1.0 | 1.0 | 1.0 | 0.9 | 0.9 | FUR4         | complemer Probable uracile or allantoin perm          | orf19.313              | 1484  | CaFUR4     | CELLULAR TRANSPORT AND TRANSPORT MECHANISMS SUBCELL                                           | transporter activity               |
| CA2515 | 1.0 | 1.0 | 0.9 | 1.0 | 1.0 | 1.0 | IPF19759     | 9200705..9 Unknown function                           | orf19.5510             | 19759 | IPF19759   | TRANSCRIPTION SUBCELLULAR LOCALISATION                                                        | molecular_function unknown         |
| CA2516 | 1.1 | 1.0 | 0.9 | 1.0 | 0.9 | 1.0 | IPF4301      | complemer unknown function                            | orf19.5513             | 4310  | IPF4301    | TRANSCRIPTION                                                                                 | transcription regulator activity   |
| CA2517 | 1.1 | 1.0 | 1.0 | 1.0 | 0.9 | 1.0 | IPF4311      | 9205609..9 unknown function                           | orf19.5514             | 4311  | IPF4311    | No significant S.c. match                                                                     |                                    |
| CA2518 | 1.1 | 1.0 | 1.0 | 1.0 | 1.0 | 1.0 | CBP3         | complemer involved in cytochrome-c reductas           | orf19.5515             | 4312  | CaCBP3     | PROTEIN FATE [folding modification destination] ""SUBCELLULAR LOC                             | molecular_function unknown         |
| CA2519 | 1.0 | 1.1 | 0.9 | 0.9 | 1.0 | 1.0 | SRP72        | 9207788..9 signal recognition particle protein        | orf19.5516             | 4313  | CaSRP72    | PROTEIN FATE [folding modification destination] ""SUBCELLULAR LOCALISATION                    |                                    |
| CA2520 | 1.1 | 1.0 | 1.1 | 0.9 | 1.0 | 1.2 | IPF20104     | 9211001..9 alcohol dehydrogenase (by homok            | orf19.5517             | 20104 | IPF20104   | C-compound and carbohydrate metabolism ENERGY                                                 | oxidoreductase activity            |
| CA2521 | 1.1 | 1.0 | 0.9 | 1.0 | 1.0 | 1.0 | IPF4317      | complemer unknown function                            | orf19.5518             | 4317  | IPF4317    | No significant S.c. match                                                                     |                                    |
| CA2522 | 1.0 | 0.9 | 1.0 | 1.0 | 1.0 | 1.0 | GCV1         | complemer glycine cleavage T protein (by hom          | orf19.5519             | 4318  | CaGCV1     | Amino acid metabolism SUBCELLULAR LOCALISATION                                                | oxidoreductase activity            |
| CA2523 | 1.1 | 0.9 | 0.9 | 1.0 | 1.0 | 1.0 | IPF4319      | complemer unknown function                            | orf19.5520             | 4319  | IPF4319    | No significant S.c. match                                                                     |                                    |
| CA2524 | 1.0 | 1.0 | 1.0 | 0.8 | 1.0 | 1.0 | IPF4322      | 9217494..9 unknown function                           | orf19.5521             | 4322  | IPF4322    | REGULATION OF/INTERACTION WITH CELLULAR ENVIRONMENT T                                         | molecular_function unknown         |
| CA2525 | 1.0 | 1.1 | 1.0 | 1.0 | 0.9 | 0.9 | IPF4324.3    | complemer unknown function, 3-prime end               | orf19.5522             | 4324  | IPF4324.3  | No significant S.c. match                                                                     |                                    |
| CA2526 | 1.0 | 1.0 | 1.1 | 1.0 | 0.9 | 1.0 | SEC20        | complemer secretory pathway prot Sec20p [C            | orf19.5526             | 4329  | CaSEC20    | PROTEIN FATE [folding modification destination] ""CELLULAR TRANSP                             | transporter activity               |
| CA2527 | 1.0 | 1.0 | 1.1 | 1.0 | 1.1 | 1.1 | IPF4331      | 9223521..9 unknown function                           | orf19.5527             | 4331  | IPF4331    | ENERGY                                                                                        | RNA binding                        |
| CA2528 | 0.9 | 1.0 | 1.0 | 1.0 | 1.0 | 1.0 | MOB1         | complemer required for completion of mitosis          | orf19.5528             | 4332  | CaMOB1     | CELL CYCLE AND DNA PROCESSING TRANSCRIPTION                                                   | enzyme regulator activity          |
| CA2530 | 1.0 | 0.9 | 1.0 | 1.0 | 0.9 | 1.0 | IPF12782     | 9229267..9 unknown function                           | orf19.3176             | 12782 | IPF12782   | UNCLASSIFIED PROTEINS                                                                         | molecular_function unknown         |
| CA2531 | 0.8 | 0.9 | 1.0 | 1.0 | 1.0 | 1.0 | RIB2         | complemer DRAP deaminase (by homology)                | orf19.3177             | 12784 | CaRIB2     | Metabolism of vitamins cofactors and prosthetic groups                                        | lyase activity                     |
| CA2532 | 1.0 | 1.1 | 1.0 | 1.0 | 1.0 | 1.0 | PRP9         | complemer pre-mRNA splicing factor                    | orf19.3178             | 20105 | CaPRP9     | TRANSCRIPTION SUBCELLULAR LOCALISATION                                                        | RNA binding                        |
| CA2533 | 0.9 | 1.0 | 1.1 | 0.9 | 0.9 | 1.0 | IPF12790     | 9234610..9 inositol polyphosphate 5-phosphat          | orf19.3180             | 12790 | IPF12790   | Lipid fatty-acid and isoprenoid metabolism                                                    | hydrolase activity                 |
| CA2534 | 1.0 | 1.0 | 1.0 | 0.9 | 1.0 | 1.1 | IPF12793     | complemer similar to Saccharomyces cerevisi           | orf19.3182             | 12793 | IPF12793   | TRANSCRIPTION PROTEIN SYNTHESIS                                                               | DNA binding,transcription regulato |

|        |     |     |     |     |     |     |            |                                                                  |       |            |                                                                                             |                                 |
|--------|-----|-----|-----|-----|-----|-----|------------|------------------------------------------------------------------|-------|------------|---------------------------------------------------------------------------------------------|---------------------------------|
| CA2535 | 0.9 | 1.0 | 0.9 | 1.0 | 0.9 | 0.9 | NCE11      | 9237807..9involved in non-classical protein export pathwa        | 20106 | CaNCE11    | CELLULAR TRANSPORT AND TRANSPORT MECHANISMS                                                 |                                 |
| CA2536 | 1.1 | 1.0 | 1.0 | 1.0 | 1.0 | 0.9 | IPF20107   | complemer unknown function orf19.3183                            | 20107 | IPF20107   | PROTEIN FATE [folding modification destination]                                             | molecular_function unknown      |
| CA2537 | 1.0 | 1.0 | 1.0 | 1.0 | 1.0 | 0.9 | IPF20108   | 9238983..9similar to Saccharomyces cerevisi:orf19.3184           | 20108 | IPF20108   | SUBCELLULAR LOCALISATION                                                                    |                                 |
| CA2538 | 1.1 | 1.0 | 1.1 | 1.0 | 1.1 | 1.1 | NAT1       | complemer Protein N-acetyltransferase subun orf19.3185           | 15324 | CaNAT1     | Lipid fatty-acid and isoprenoid metabolism ""PROTEIN SYNTHESIS ""PFtransferase activity     |                                 |
| CA2539 | 1.0 | 1.0 | 1.0 | 1.0 | 1.0 | 1.1 | IPF9188    | 9243131..9unknown function orf19.3187                            | 9188  | IPF9188    | TRANSCRIPTION ""CELL RESCUE DEFENSE AND VIRULENCE ""SUBCELLULAR LOCALISATION                |                                 |
| CA2541 | 0.9 | 1.0 | 1.1 | 1.1 | 1.1 | 1.1 | IPF9191.3F | 9247480..9unknown function, 3-prime end orf19.3188               | 9191  | IPF9191.3f | TRANSCRIPTION ""CELL RESCUE DEFENSE AND VIRULENCE ""SUBCELLULAR LOCALISATION                |                                 |
| CA2542 | 1.0 | 1.0 | 0.9 | 1.1 | 1.1 | 1.0 | IPF16067   | 9251849..9unknown function orf19.3190                            | 16067 | IPF16067   | TRANSCRIPTION ""CELL RESCUE DEFENSE AND VIRULENCE ""SUBCELLULAR LOCALISATION                |                                 |
| CA2543 | 1.1 | 1.0 | 1.0 | 0.9 | 1.0 | 1.0 | IPF16925   | 9257179..9unknown function orf19.2828                            | 16925 | IPF16925   | PROTEIN FATE [folding modification destination] ""SUBCELLULAR LOCALISATION                  |                                 |
| CA2544 | 1.0 | 1.0 | 1.0 | 0.9 | 1.0 | 1.1 | IPF16924   | 9258342..9unknown function orf19.2829                            | 16924 | IPF16924   | UNCLASSIFIED PROTEINS                                                                       | molecular_function unknown      |
| CA2545 | 1.1 | 1.0 | 1.1 | 1.0 | 1.0 | 0.9 | RRP9       | 9259154..9U3 small nucleolar ribonucleoproteorf19.2830           | 15036 | CaRRP9     | TRANSCRIPTION                                                                               | RNA binding                     |
| CA2546 | 1.1 | 1.0 | 1.0 | 1.0 | 1.0 | 1.1 | RPC31      | complemer DNA-directed RNA polymerase III orf19.2831             | 15034 | CaRPC31    | TRANSCRIPTION SUBCELLULAR LOCALISATION                                                      | nucleotidyltransferase activity |
| CA2547 | 1.0 | 0.9 | 0.9 | 1.0 | 1.0 | 1.0 | IPF14911   | 9265854..9unknown function orf19.2832                            | 14911 | IPF14911   | UNCLASSIFIED PROTEINS                                                                       | molecular_function unknown      |
| CA2548 | 1.0 | 0.9 | 0.9 | 1.0 | 1.0 | 0.9 | IPF9101    | complemer unknown function orf19.2833                            | 9101  | IPF9101    | No significant S.c. match                                                                   |                                 |
| CA2549 | 1.0 | 1.0 | 1.0 | 1.0 | 1.0 | 1.1 | RPD31      | complemer histone deacetylase B histone deorf19.2834             | 9100  | CaRPD31    | Phosphate metabolism CELL CYCLE AND DNA PROCESSING TRANSCRIPTION CELL FATE SUBCELL          |                                 |
| CA2550 | 1.1 | 1.0 | 1.0 | 1.0 | 1.0 | 1.0 | IPF9099    | complemer similar to Saccharomyces cerevisi:orf19.2835           | 9099  | IPF9099    | PROTEIN FATE [folding modification destination]                                             |                                 |
| CA2551 | 1.0 | 1.0 | 1.0 | 0.9 | 1.0 | 1.0 | IPF9098    | 9275206..9unknown function orf19.2836                            | 9098  | IPF9098    | No significant S.c. match                                                                   |                                 |
| CA2552 | 1.0 | 0.9 | 1.0 | 1.0 | 1.0 | 1.0 | ALG5       | complemer dolichol-P-glucose synthetase (by orf19.2837           | 9097  | CaALG5     | C-compound and carbohydrate metabolism ""PROTEIN FATE [folding mtransferase activity        |                                 |
| CA2553 | 0.9 | 1.0 | 1.0 | 1.0 | 1.0 | 1.0 | IPF9096    | complemer probable mannosidase (by homolcorf19.2838              | 9096  | IPF9096    | No significant S.c. match                                                                   |                                 |
| CA2554 | 1.0 | 0.9 | 0.9 | 1.1 | 1.0 | 1.0 | CIRT4B     | 9280201..9probable transposase (by homologorf19.2839             | 9095  | CaCirt4b   | CELL CYCLE AND DNA PROCESSING SUBCELLULAR LOCALISATION                                      |                                 |
| CA2555 | 0.9 | 1.0 | 1.1 | 1.0 | 1.1 | 1.0 | IPF12105   | complemer unknown function orf19.5633                            | 12105 | IPF12105   | C-compound and carbohydrate metabolism ENERGY SUBCELLULAR LOCALISATION                      |                                 |
| CA2556 | 0.9 | 0.8 | 0.9 | 0.9 | 1.1 | 0.5 | FRE5       | complemer ferric reductase transmembrane ccorf19.5634            | 12102 | CaFRE5     | REGULATION OF/INTERACTION WITH CELLULAR ENVIRONMENT Other virulence attributes              |                                 |
| CA2557 | 1.0 | 1.0 | 0.8 | 0.7 | 1.0 | 0.6 | IPF12101   | 9287725..9mycelial surface antigen precursororf19.5635           | 12101 | IPF12101   | No significant S.c. match                                                                   |                                 |
| CA2558 | 0.2 | 0.7 | 0.8 | 0.7 | 0.5 | 0.5 | RBT5       | 9289637..9repressed by TUP1 protein 5 orf19.5636                 | 19952 | CaRBT5     | No significant S.c. match                                                                   |                                 |
| CA2559 | 1.0 | 0.9 | 1.0 | 1.0 | 1.0 | 1.0 | HIS4       | complemer Histidine biosynthesis trifunctionalorf19.5639         | 12359 | CaHIS4     | Amino acid metabolism                                                                       | oxidoreductase activity         |
| CA2560 | 1.1 | 1.0 | 1.0 | 0.9 | 1.0 | 1.0 | PEX5       | complemer peroxisomal targeting signal receporf19.5640           | 12357 | CaPEX5     | PROTEIN FATE [folding modification destination] ""CELLULAR TRANSPsignal transducer activity |                                 |
| CA2561 | 0.9 | 1.1 | 0.9 | 1.0 | 1.0 | 1.0 | CAR2       | complemer ornithine aminotransferase (by hororf19.5641           | 12355 | CaCAR2     | Amino acid metabolism Nitrogen and sulphur metabolism SUBCELLULtransferase activity         |                                 |
| CA2562 | 1.1 | 1.0 | 1.0 | 0.9 | 1.0 | 1.0 | IPF19953   | 9297454..9unknown function orf19.5642                            | 19953 | IPF19953   | No significant S.c. match                                                                   |                                 |
| CA2563 | 1.0 | 1.0 | 1.0 | 1.0 | 1.0 | 1.0 | ECM7       | 9298071..9cell wall biogenesis and architectuorf19.5643          | 12129 | CaECM7     | CONTROL OF CELLULAR ORGANIZATION                                                            | molecular_function unknown      |
| CA2564 | 1.1 | 1.2 | 1.1 | 1.1 | 1.1 | 1.0 | IPF12127   | 9299670..9unknown function orf19.5644                            | 12127 | IPF12127   | UNCLASSIFIED PROTEINS                                                                       | molecular_function unknown      |
| CA2565 | 1.0 | 1.0 | 1.0 | 1.2 | 1.1 | 1.1 | MET15      | complemer O-acetylhomoserine O-acetylserinorf19.5645             | 12125 | CaMET15    | Amino acid metabolism SUBCELLULAR LOCALISATION                                              | transferase activity            |
| CA2566 | 0.9 | 1.0 | 1.1 | 1.1 | 1.0 | 1.0 | IPF12122   | 9302509..9unknown function orf19.5646                            | 12122 | IPF12122   | UNCLASSIFIED PROTEINS                                                                       | molecular_function unknown      |
| CA2567 | 1.0 | 0.9 | 1.0 | 1.0 | 1.0 | 1.0 | SUB2.3F    | complemer Involved in pre-mRNA splicing, 3-prorf19.5647          | 12120 | CaSUB2.3f  | TRANSCRIPTION                                                                               | protein binding                 |
| CA2569 | 1.1 | 1.0 | 1.0 | 1.0 | 1.1 | 1.1 | IPF12117   | complemer unknown function orf19.5648                            | 12117 | IPF12117   | No significant S.c. match                                                                   |                                 |
| CA2570 | 1.0 | 1.0 | 1.0 | 1.0 | 1.1 | 0.9 | PRO3       | complemer delta 1-pyrroline-5-carboxylate redorf19.5650          | 12114 | CaPRO3     | Amino acid metabolism SUBCELLULAR LOCALISATION                                              | oxidoreductase activity         |
| CA2571 | 1.1 | 1.2 | 1.0 | 0.9 | 1.0 | 0.9 | IPF13769   | 9309333..9unknown function orf19.1359f                           | 13769 | IPF13769   | TRANSPORT FACILITATION                                                                      | transporter activity            |
| CA2572 | 1.0 | 0.9 | 1.0 | 1.1 | 0.9 | 1.0 | IPF13766   | 9311002..9unknown function orf19.6211                            | 13766 | IPF13766   | CELL CYCLE AND DNA PROCESSING ""PROTEIN FATE [folding modification destination] ""SUBCELLUL |                                 |
| CA2573 | 1.1 | 1.1 | 1.1 | 1.0 | 1.2 | 1.2 | SUI2       | complemer translation initiation factor eIF2, alporf19.6213      | 13764 | CaSUI2     | PROTEIN SYNTHESIS SUBCELLULAR LOCALISATION                                                  | translation regulator activity  |
| CA2574 | 1.0 | 1.0 | 1.1 | 1.1 | 1.0 | 1.0 | ATH1       | 9315495..9acid trehalase, vacuolar orf19.6214                    | 19760 | CaATH1     | C-compound and carbohydrate metabolism ENERGY ""CELL RESCUE [hydrolyase activity            |                                 |
| CA2575 | 1.0 | 1.1 | 1.0 | 0.9 | 0.9 | 1.0 | SEC31      | complemer Component of the COPII coat of Eorf19.6217             | 7439  | CaSEC31    | CELLULAR TRANSPORT AND TRANSPORT MECHANISMS SUBCELLstructural molecule activity             |                                 |
| CA2576 | 1.1 | 1.0 | 0.9 | 1.0 | 1.1 | 1.0 | IPF7432    | 9323625..9unknown function orf19.6219                            | 7432  | IPF7432    | No significant S.c. match                                                                   |                                 |
| CA2577 | 1.1 | 1.0 | 0.9 | 1.0 | 1.0 | 1.1 | IPF7430    | 9325294..9unknown function orf19.6220                            | 7430  | IPF7430    | UNCLASSIFIED PROTEINS                                                                       | molecular_function unknown      |
| CA2578 | 1.0 | 1.0 | 1.1 | 1.1 | 1.0 | 1.1 | MMD1.3     | 9328479..9Maintenance of mitochondrial DNA, 3-prime eorf19.6221  | 7427  | CaMMD1.3   | CONTROL OF CELLULAR ORGANIZATION                                                            | molecular_function unknown      |
| CA2579 | 1.2 | 1.2 | 0.8 | 0.8 | 0.9 | 1.0 | RPL34B.3   | 9329645..9Ribosomal protein L34.e, 3-prime end (by honorf19.6222 | 7424  | CaRPL34B   | PROTEIN SYNTHESIS SUBCELLULAR LOCALISATION                                                  | structural molecule activity    |
| CA2581 | 1.1 | 1.1 | 1.0 | 1.0 | 1.0 | 1.0 | IPF9450    | 9330479..9unknown function orf19.4370                            | 9450  | IPF9450    | No significant S.c. match                                                                   |                                 |
| CA2582 | 1.0 | 0.9 | 1.0 | 1.0 | 1.0 | 1.0 | TAL1       | 9335898..9transaldolase (by homology) orf19.4371                 | 9448  | CaTAL1     | C-compound and carbohydrate metabolism ENERGY SUBCELLULAR Ltransferase activity             |                                 |
| CA2583 | 1.0 | 0.9 | 1.1 | 1.1 | 0.9 | 0.9 | IPF9445    | complemer unknown function orf19.4372                            | 9445  | IPF9445    | TRANSPORT FACILITATION                                                                      |                                 |
| CA2584 | 0.9 | 1.0 | 1.0 | 1.0 | 1.0 | 1.0 | IPF9440    | complemer similar to Saccharomyces cerevisi:orf19.4373           | 9440  | IPF9440    | CLASSIFICATION NOT YET CLEAR-CUT                                                            | transferase activity            |
| CA2585 | 1.0 | 1.0 | 1.0 | 1.0 | 1.0 | 1.0 | IPF9438    | complemer similar to Saccharomyces cerevisi:orf19.4374           | 9438  | IPF9438    | TRANSCRIPTION SUBCELLULAR LOCALISATION                                                      | RNA binding                     |
| CA2586 | 1.0 | 1.0 | 1.1 | 1.0 | 1.0 | 1.0 | IPF9435    | 9343175..9unknown function orf19.4375                            | 9435  | IPF9435    | UNCLASSIFIED PROTEINS                                                                       | transferase activity            |
| CA2587 | 1.1 | 1.1 | 0.9 | 1.0 | 1.0 | 1.1 | RPS30.3    | complemer 40S ribosomal protein S30, 3-prime end (by horf19.4376 | 15100 | CaRPS30.3  | PROTEIN SYNTHESIS SUBCELLULAR LOCALISATION                                                  | structural molecule activity    |
| CA2588 | 1.0 | 1.0 | 1.0 | 0.9 | 0.9 | 1.0 | IPF15098   | complemer Unknown function orf19.4376                            | 15098 | IPF15098   | No significant S.c. match                                                                   |                                 |
| CA2589 | 0.9 | 0.9 | 1.0 | 1.1 | 1.1 | 1.1 | KRE1       | complemer secretory pathway protein orf19.4377                   | 13702 | CaKRE1     | No significant S.c. match                                                                   |                                 |
| CA2590 | 1.0 | 1.0 | 1.0 | 0.9 | 1.0 | 1.0 | PPH3.3B    | complemer protein serine/threonine phosphatorf19.4378            | 12918 | CaPPH3.3f  | CELL FATE                                                                                   |                                 |
| CA2591 | 1.0 | 1.0 | 1.0 | 1.0 | 1.0 | 1.0 | IPF18448.3 | 9357618..9unknown function, 3-prime end orf19.60                 | 18448 | IPF18448.3 | SUBCELLULAR LOCALISATION UNCLASSIFIED PROTEINS                                              |                                 |
| CA2592 | 1.1 | 0.9 | 1.0 | 1.1 | 1.0 | 1.0 | IPF18447   | complemer putative zinc-finger protein (by honorf19.59           | 18447 | IPF18447   | UNCLASSIFIED PROTEINS                                                                       | molecular_function unknown      |
| CA2593 | 1.0 | 1.0 | 1.0 | 1.1 | 1.0 | 1.0 | RRP6       | 9359514..9involved in 5.8S rRNA processing orf19.58              | 12827 | CaRRP6     | UNCLASSIFIED PROTEINS                                                                       | RNA binding                     |
| CA2594 | 1.0 | 1.0 | 1.0 | 1.0 | 1.0 | 1.0 | IPF12824   | 9362616..9unknown function orf19.57                              | 12824 | IPF12824   | UNCLASSIFIED PROTEINS                                                                       | DNA binding                     |
| CA2595 | 1.0 | 1.0 | 1.1 | 1.0 | 0.9 | 1.0 | ARG2       | 9363451..9acetylglutamate synthase (by homorf19.56               | 12823 | CaARG2     | Amino acid metabolism                                                                       | transferase activity            |
| CA2596 | 1.1 | 1.1 | 1.0 | 1.0 | 1.0 | 1.1 | IPF19546   | 9365758..9unknown function orf19.55                              | 19546 | IPF19546   | UNCLASSIFIED PROTEINS                                                                       | molecular_function unknown      |
| CA2597 | 1.0 | 1.0 | 1.1 | 1.0 | 1.0 | 1.0 | IFQ3       | complemer unknown function orf19.54                              | 13148 | CaIFQ3     | No significant S.c. match                                                                   |                                 |
| CA2598 | 1.1 | 1.0 | 1.0 | 1.0 | 0.9 | 1.0 | IPF13142   | 9371688..9unknown function orf19.53                              | 13142 | IPF13142   | No significant S.c. match                                                                   |                                 |
| CA2599 | 0.9 | 1.0 | 1.0 | 1.0 | 0.9 | 1.0 | IPF11176   | 9373658..9similar to Saccharomyces cerevisi:orf19.52             | 11176 | IPF11176   | CELLULAR TRANSPORT AND TRANSPORT MECHANISMS REGULamolecular_function unknown                |                                 |
| CA2600 | 0.9 | 1.1 | 1.0 | 0.9 | 0.9 | 1.0 | IPF11177   | complemer similar to Saccharomyces cerevisi:orf19.51             | 11177 | IPF11177   | PROTEIN SYNTHESIS CONTROL OF CELLULAR ORGANIZATION                                          | molecular_function unknown      |
| CA2601 | 0.9 | 0.9 | 1.0 | 1.0 | 1.0 | 1.0 | IPF11181   | 9381355..9unknown function orf19.50                              | 11181 | IPF11181   | PROTEIN FATE [folding modification destination]                                             | ligase activity                 |
| CA2602 | 1.0 | 1.0 | 1.0 | 1.0 | 1.0 | 1.1 | IPF5473    | complemer unknown function orf19.5679                            | 5473  | IPF5473    | PROTEIN FATE [folding modification destination]                                             |                                 |
| CA2603 | 1.0 | 1.0 | 1.0 | 0.9 | 0.9 | 1.0 | IPF5471    | complemer unknown function orf19.5680                            | 5471  | IPF5471    | No significant S.c. match                                                                   |                                 |
| CA2604 | 1.0 | 1.0 | 1.0 | 1.0 | 1.0 | 1.1 | IPF5469    | complemer unknown function orf19.5681                            | 5469  | IPF5469    | No significant S.c. match                                                                   |                                 |
| CA2605 | 1.1 | 1.0 | 1.0 | 1.0 | 1.0 | 1.1 | SRP1       | 9388143..9.alpha importin by homology orf19.5682                 | 5468  | CaSRP1     | PROTEIN FATE [folding modification destination] ""CELLULAR TRANSPprotein binding            |                                 |
| CA2606 | 0.9 | 1.0 | 1.1 | 1.1 | 1.0 | 1.1 | IPF5466    | 9389917..9unknown function orf19.5683                            | 5466  | IPF5466    | UNCLASSIFIED PROTEINS                                                                       | molecular_function unknown      |
| CA2607 | 0.9 | 0.9 | 0.9 | 0.9 | 0.8 | 0.8 | MRPL38     | 9390697..9ribosomal protein of the large suborf19.5684           | 5464  | CaMRPL38   | PROTEIN SYNTHESIS SUBCELLULAR LOCALISATION                                                  | structural molecule activity    |
| CA2608 | 1.0 | 1.0 | 1.0 | 1.1 | 1.0 | 0.9 | THS1       | 9391498..9threonyl tRNA synthetase by homcorf19.5685             | 5462  | CaTHS1     | Nucleotide metabolism PROTEIN SYNTHESIS SUBCELLULAR LOCALigase activity                     |                                 |
| CA2609 | 1.1 | 1.0 | 1.0 | 1.0 | 1.0 | 1.1 | IPF5457    | 9395086..9similar to Saccharomyces cerevisi:orf19.5689           | 5457  | IPF5457    | PROTEIN FATE [folding modification destination] ""CELLULAR TRANSPmolecular_function unknown |                                 |

|        |     |     |     |     |     |     |              |                                                              |                |                                                                                            |                                    |
|--------|-----|-----|-----|-----|-----|-----|--------------|--------------------------------------------------------------|----------------|--------------------------------------------------------------------------------------------|------------------------------------|
| CA2610 | 1.0 | 1.0 | 0.9 | 0.8 | 1.0 | 1.1 | CDC11        | complemer septin by homology septin [Canorf19.5691           | 5456 CaCDC11   | C-compound and carbohydrate metabolism CELL CYCLE AND DNA PR                               | structural molecule activity       |
| CA2611 | 0.9 | 0.9 | 0.9 | 1.0 | 1.0 | 1.0 | IPF5453      | 9397365..9 unknown function orf19.5692                       | 5453 IPF5453   | No significant S.c. match                                                                  |                                    |
| CA2612 | 1.0 | 1.1 | 1.1 | 1.0 | 0.9 | 1.0 | GAA1         | 9399699..9 required for attachment of GPI anc orf19.5693     | 5450 CaGAA1    | Lipid fatty-acid and isoprenoid metabolism """"PROTEIN FATE [folding m                     | hydrolase activity                 |
| CA2613 | 1.0 | 1.1 | 1.0 | 1.0 | 1.0 | 1.0 | IPF5446      | complemer putative ribosomal protein (by hom orf19.5698      | 5446 IPF5446   | PROTEIN SYNTHESIS                                                                          | structural molecule activity       |
| CA2614 | 1.2 | 0.8 | 0.6 | 0.9 | 0.8 | 0.7 | CTA241.EXON  | complemer transcriptional activator, exon 2                  | 5444 CaCTA241  | No significant S.c. match                                                                  |                                    |
| CA2615 | 1.0 | 1.0 | 1.1 | 1.0 | 0.9 | 1.0 | CTA241.EXON  | complemer transcriptional activator, exon 1 orf19.5700       | 5443 CaCTA241  | No significant S.c. match                                                                  |                                    |
| CA2616 | 1.0 | 1.0 | 1.0 | 1.0 | 0.9 | 1.0 | IPF3540      | 9407379..9 unknown function orf19.2814                       | 3540 IPF3540   | No significant S.c. match                                                                  |                                    |
| CA2617 | 1.0 | 1.0 | 1.0 | 1.0 | 0.9 | 0.9 | IPF3539      | complemer unknown function orf19.2813                        | 3539 IPF3539   | No significant S.c. match                                                                  |                                    |
| CA2618 | 0.9 | 1.0 | 1.1 | 1.1 | 0.9 | 1.1 | SNG2         | complemer drug transporter (by homology) orf19.2812          | 19762 CaSNG2   | CELL RESCUE DEFENSE AND VIRULENCE ""TRANSPORT FACILITATION                                 |                                    |
| CA2619 | 1.0 | 1.0 | 1.0 | 1.0 | 1.1 | 0.9 | IPF9490      | complemer amino acid permease (by homology orf19.2810        | 9490 IPF9490   | Amino acid metabolism CELLULAR TRANSPORT AND TRANSPORT MECHANISMS SUBCELLULAR LO           |                                    |
| CA2620 | 1.0 | 1.2 | 1.0 | 1.1 | 1.0 | 1.0 | IPF9496      | complemer carnitine O-acetyltrans putative ca orf19.2809     | 9496 IPF9496   | C-compound and carbohydrate metabolism ""Lipid fatty-acid and isopren-transferase activity |                                    |
| CA2621 | 1.0 | 1.1 | 1.0 | 1.2 | 1.0 | 1.0 | IPF9499      | complemer probable transcription factor (by h orf19.2808     | 9499 IPF9499   | C-compound and carbohydrate metabolism ENERGY TRANSCRIPTION SUBCELLULAR LOCALISATION       |                                    |
| CA2622 | 1.0 | 1.0 | 1.0 | 1.0 | 0.9 | 1.0 | PER3.EXON2   | complemer peroxisomal import protein, exon 2 orf19.2806      | 11531 CaPER3.e | No significant S.c. match                                                                  |                                    |
| CA2623 | 1.0 | 1.1 | 1.0 | 1.1 | 1.0 | 1.0 | PER3.EXON1   | complemer peroxisomal import protein, exon 1 orf19.1032      | 19631 CaPER3.e | No significant S.c. match                                                                  |                                    |
| CA2624 | 1.0 | 1.0 | 1.0 | 1.1 | 0.9 | 0.9 | ARG81.3EOC   | 9436131..9 transcription factor possibly involved in arginin | 17734 CaARG81  | Amino acid metabolism Nitrogen and sulphur metabolism TRANSCRIPTION SUBCELLULAR LOCALISAT  |                                    |
| CA2625 | 1.0 | 1.0 | 1.0 | 1.0 | 1.0 | 1.1 | IPF10919     | 9438459..9 Similar to Flo1p (by homology) orf19.1222         | 10919 IPF10919 | CONTROL OF CELLULAR ORGANIZATION                                                           | molecular_function unknown         |
| CA2626 | 1.0 | 1.0 | 1.0 | 1.0 | 1.1 | 1.0 | PAN2         | complemer component of Pab1p-stimulated p orf19.4764         | 10918 CaPAN2   | TRANSCRIPTION PROTEIN SYNTHESIS                                                            | RNA binding                        |
| CA2627 | 1.0 | 1.1 | 1.0 | 1.0 | 1.0 | 1.0 | IPF10916     | 9444414..9 unknown function orf19.4763                       | 10916 IPF10916 | UNCLASSIFIED PROTEINS                                                                      | molecular_function unknown         |
| CA2628 | 1.1 | 1.0 | 1.0 | 1.0 | 1.0 | 1.1 | SIR22        | complemer canal regulatory protein (by homol orf19.1222      | 10913 CaSIR22  | TRANSCRIPTION CELL FATE                                                                    | hydrolase activity                 |
| CA2629 | 1.1 | 1.0 | 1.0 | 1.0 | 1.0 | 1.0 | IPF10911     | 9448317..9 unknown function orf19.1222                       | 18440 IPF10911 | UNCLASSIFIED PROTEINS                                                                      | transferase activity               |
| CA2630 | 1.0 | 1.3 | 1.0 | 1.0 | 1.0 | 0.9 | COX5A        | 9450350..9 cytochrome-c oxidase chain V.A p orf19.1222       | 10910 CaCOX5A  | ENERGY SUBCELLULAR LOCALISATION                                                            | oxidoreductase activity            |
| CA2631 | 1.0 | 1.1 | 1.0 | 0.9 | 1.0 | 1.0 | IPF14389     | complemer ubiquinone oxidoreductase subuni orf19.4758        | 14389 IPF14389 | No significant S.c. match                                                                  |                                    |
| CA2632 | 1.1 | 1.1 | 1.1 | 1.1 | 1.1 | 0.7 | NAR1         | complemer Yeast nuclear architecture related orf19.4757      | 14388 CaNAR1   | UNCLASSIFIED PROTEINS                                                                      | oxidoreductase activity            |
| CA2633 | 0.9 | 0.9 | 1.0 | 1.0 | 1.0 | 1.0 | KEX2         | 9457875..9 Kexin precursor (KEX2 protease) orf19.4755        | 13063 CaKEX2   | PROTEIN FATE [folding modification destination] ""CELL FATE SUBCEL                         | peptidase activity                 |
| CA2634 | 1.1 | 1.0 | 1.5 | 1.9 | 1.4 | 1.4 | ZWF1         | 9462347..9 glucose-6-phosphate dehydrogen orf19.1221         | 13060 CaZWF1   | C-compound and carbohydrate metabolism ENERGY ""CELL RESCUE [oxidoreductase activity       |                                    |
| CA2635 | 1.0 | 1.0 | 1.0 | 0.9 | 0.9 | 1.0 | CKB22        | 9466876..9 Casein kinase II, beta subunit (by orf19.4297     | 2946 CaCKB22   | TRANSCRIPTION SUBCELLULAR LOCALISATION                                                     | protein kinase activity            |
| CA2636 | 1.1 | 1.0 | 1.0 | 1.0 | 0.9 | 1.0 | MSW1         | 9468015..9 Mitochondrial tryptophanyl-tRNA s orf19.4299      | 2944 CaMSW1    | PROTEIN SYNTHESIS SUBCELLULAR LOCALISATION                                                 | ligase activity                    |
| CA2637 | 0.9 | 1.0 | 1.0 | 1.0 | 1.0 | 0.9 | IPF19954     | 9470178..9 unknown function orf19.4301                       | 19954 IPF19954 | No significant S.c. match                                                                  |                                    |
| CA2638 | 1.0 | 1.0 | 1.0 | 0.9 | 1.0 | 1.1 | GAP3         | complemer General amino acid pe Gap1 prote orf19.4304        | 2936 CaGAP3    | Amino acid metabolism CELLULAR TRANSPORT AND TRANSPORT MECHANISMS SUBCELLULAR LO           |                                    |
| CA2639 | 1.0 | 1.0 | 1.0 | 0.9 | 0.9 | 1.0 | IPF2932      | complemer unknown function orf19.4305                        | 2932 IPF2932   | CELLULAR TRANSPORT AND TRANSPORT MECHANISMS SUBCELLULAR LOCALISATION                       |                                    |
| CA2640 | 1.0 | 1.0 | 0.9 | 0.9 | 1.0 | 0.9 | IPF2930      | 9476075..9 Suppressor of PAB1 (by homology)                  | 2930 IPF2930   | TRANSCRIPTION                                                                              |                                    |
| CA2641 | 1.0 | 1.0 | 1.1 | 1.0 | 1.0 | 0.9 | IPF2929      | complemer unknown function orf19.4306                        | 2929 IPF2929   | UNCLASSIFIED PROTEINS                                                                      | molecular_function unknown         |
| CA2642 | 1.0 | 1.0 | 1.0 | 0.9 | 0.9 | 1.0 | FTI1         | 9477448..9 Rad52 inhibitor (by homology) orf19.4307          | 2927 CaFTI1    | PROTEIN FATE [folding modification destination] ""CELLULAR TRANSP                          | molecular_function unknown         |
| CA2643 | 1.1 | 1.0 | 1.1 | 1.1 | 1.2 | 1.0 | HSL1         | complemer Ser/thr protein kinase that interact orf19.4308    | 2926 CaHSL1    | CELL CYCLE AND DNA PROCESSING CELL FATE SUBCELLULAR LC                                     | protein kinase activity            |
| CA2644 | 1.0 | 0.9 | 1.1 | 1.3 | 1.3 | 1.3 | GRP2         | complemer Reductase (by homology) orf19.4309                 | 2918 CaGRP2    | Metabolism of vitamins cofactors and prosthetic groups                                     |                                    |
| CA2645 | 0.9 | 1.0 | 0.7 | 0.5 | 0.7 | 0.9 | YNK1         | 9488422..9 Nucleoside diphosphate kinase (b orf19.4311       | 2914 CaYNK1    | Nucleotide metabolism SUBCELLULAR LOCALISATION                                             | transferase activity               |
| CA2646 | 1.0 | 1.1 | 1.1 | 1.0 | 1.0 | 1.0 | IPF13089     | 9493426..9 unknown function orf19.1185                       | 13899 IPF13089 | UNCLASSIFIED PROTEINS                                                                      | molecular_function unknown         |
| CA2647 | 1.0 | 1.0 | 1.0 | 1.1 | 0.9 | 1.1 | IPF13088     | 9494709..9 unknown function orf19.1186                       | 13088 IPF13088 | UNCLASSIFIED PROTEINS                                                                      |                                    |
| CA2648 | 1.0 | 1.0 | 1.0 | 1.0 | 1.1 | 1.1 | IPF9062      | 9497177..9 unknown function orf19.1187                       | 9062 IPF9062   | CLASSIFICATION NOT YET CLEAR-CUT                                                           | DNA binding,transcription regulato |
| CA2649 | 1.0 | 1.0 | 1.0 | 1.0 | 0.9 | 1.0 | IPF9057      | 9504384..9 unknown function orf19.1189                       | 9057 IPF9057   | CELL CYCLE AND DNA PROCESSING SUBCELLULAR LOCALISATION                                     |                                    |
| CA2650 | 1.0 | 1.0 | 1.0 | 1.0 | 1.0 | 1.0 | STV1         | complemer H+-ATPase V0 domain (by homol orf19.1190           | 13604 CaSTV1   | PROTEIN FATE [folding modification destination] ""CELLULAR TRANSPORT AND TRANSPORT MECHAN  |                                    |
| CA2651 | 1.0 | 1.0 | 1.1 | 1.0 | 0.9 | 1.0 | HRD3         | 9511782..9 involved in HMG-CoA reductase d orf19.1191        | 13605 CaHRD3   | PROTEIN FATE [folding modification destination]                                            | ligase activity                    |
| CA2652 | 1.0 | 1.1 | 1.0 | 1.0 | 1.0 | 1.0 | DNA2         | complemer DNA helicase (by homology) orf19.1192              | 15025 CaDNA2   | CELL CYCLE AND DNA PROCESSING SUBCELLULAR LOCALISATIO                                      | DNA binding,helicase activity      |
| CA2653 | 1.0 | 1.0 | 0.9 | 1.0 | 1.0 | 1.0 | IPF8472.3EOC | 9519932..9 unknown function, 3-prime end orf19.5701          | 8472 IPF8472.3 | UNCLASSIFIED PROTEINS                                                                      | protein binding                    |
| CA2654 | 1.0 | 1.0 | 1.1 | 1.0 | 0.9 | 0.9 | IPF8474      | complemer unknown function orf19.5702                        | 8474 IPF8474   | UNCLASSIFIED PROTEINS                                                                      | molecular_function unknown         |
| CA2655 | 1.0 | 1.0 | 0.9 | 0.9 | 1.0 | 1.0 | IPF8477      | 9526218..9 unknown function orf19.5704                       | 8477 IPF8477   | UNCLASSIFIED PROTEINS                                                                      | molecular_function unknown         |
| CA2656 | 1.0 | 1.0 | 1.0 | 1.0 | 1.0 | 1.0 | NAM2         | complemer mitochondrial leucine-- nuclear enc orf19.5705     | 19955 CaNAM2   | TRANSCRIPTION PROTEIN SYNTHESIS SUBCELLULAR LOCALISAT                                      | RNA binding                        |
| CA2657 | 1.0 | 1.1 | 1.0 | 0.9 | 1.1 | 1.0 | IPF8486      | 9531702..9 unknown function orf19.5710                       | 8486 IPF8486   | TRANSCRIPTION CELLULAR TRANSPORT AND TRANSPORT MECHANISMS SUBCELLULAR LOCALIS              |                                    |
| CA2658 | 0.9 | 1.0 | 1.0 | 1.0 | 0.9 | 1.0 | IPF8105      | 9538183..9 unknown function orf19.5711                       | 8105 IPF8105   | Lipid fatty-acid and isoprenoid metabolism                                                 | transporter activity               |
| CA2659 | 1.1 | 1.0 | 0.9 | 0.9 | 0.9 | 1.0 | NDH2         | 9540741..9 NADH dehydrogenase (by homolo orf19.5713          | 8102 CaNDH2    | ENERGY SUBCELLULAR LOCALISATION                                                            |                                    |
| CA2660 | 1.0 | 1.1 | 1.1 | 1.0 | 1.0 | 1.0 | SAP1         | complemer secreted aspartyl prote secreted as orf19.5714     | 8101 CaSAP1    | PROTEIN FATE [folding modification destination] ""Other virulence attributes               |                                    |
| CA2661 | 0.9 | 0.9 | 0.8 | 1.0 | 1.0 | 1.0 | AAT1         | 9551732..9 aspartate aminotransferase (by ho orf19.3554      | 14258 CaAAT1   | Amino acid metabolism Nitrogen and sulphur metabolism SUBCELLULAR LOCALISATION             |                                    |
| CA2662 | 0.9 | 1.0 | 1.0 | 1.0 | 1.1 | 1.1 | IPF17139     | 9553708..9 unknown function orf19.3553                       | 17139 IPF17139 | UNCLASSIFIED PROTEINS                                                                      | RNA binding                        |
| CA2663 | 0.9 | 0.9 | 0.9 | 0.9 | 0.9 | 1.1 | NUP133       | 9555106..9 nuclear pore protein (by homology orf19.3552      | 13373 CaNUP133 | TRANSCRIPTION CELLULAR TRANSPORT AND TRANSPORT MECH                                        | structural molecule activity       |
| CA2664 | 1.0 | 1.0 | 1.0 | 1.0 | 1.1 | 1.0 | IPF13370     | complemer unknown function orf19.3551                        | 13370 IPF13370 | UNCLASSIFIED PROTEINS                                                                      | structural molecule activity       |
| CA2665 | 1.0 | 1.0 | 1.1 | 1.0 | 1.0 | 0.9 | CDC21        | complemer thymidylate synthase (by homolog orf19.3549        | 13364 CaCDC21  | Nucleotide metabolism SUBCELLULAR LOCALISATION                                             | transferase activity               |
| CA2666 | 1.0 | 1.0 | 1.1 | 1.0 | 1.0 | 0.9 | IPF16995     | complemer unknown function orf19.3548                        | 16995 IPF16995 | UNCLASSIFIED PROTEINS                                                                      | molecular_function unknown         |
| CA2667 | 0.9 | 1.0 | 1.1 | 1.0 | 1.0 | 0.9 | IPF16996     | 9563566..9 unknown function orf19.3547                       | 16996 IPF16996 | UNCLASSIFIED PROTEINS                                                                      | molecular_function unknown         |
| CA2668 | 0.9 | 1.0 | 1.0 | 1.0 | 0.9 | 1.0 | IPF17553     | complemer similar to Saccharomyces cerevisi orf19.3546       | 17553 IPF17553 | CELLULAR TRANSPORT AND TRANSPORT MECHANISMS SUBCELL                                        | protein binding                    |
| CA2669 | 1.1 | 1.0 | 1.0 | 0.9 | 1.0 | 1.0 | IPF17494.3EC | complemer unknown function, 3-prime end                      | 17494 IPF17494 | No significant S.c. match                                                                  |                                    |
| CA2670 | 0.9 | 1.0 | 1.1 | 1.0 | 1.0 | 1.0 | MAK16        | 9569686..9 nuclear viral propagation protein (torf19.5500    | 5859 CaMAK16   | CELL CYCLE AND DNA PROCESSING SUBCELLULAR LOCALISATION                                     | molecular_function unknown         |
| CA2671 | 0.9 | 0.9 | 1.0 | 1.0 | 1.1 | 1.1 | IPF5856      | 9571354..9 4-hydroxyphenylpyruvate dioxyger orf19.5499       | 5856 IPF5856   | No significant S.c. match                                                                  |                                    |
| CA2672 | 0.9 | 0.9 | 1.0 | 0.9 | 0.9 | 1.0 | EFH1         | complemer Transcription regulator orf19.5498                 | 5855 CaEFH1    | TRANSCRIPTION CELLULAR COMMUNICATION/SIGNAL TRANSDUCTION MECHANISM CELL FATE S             |                                    |
| CA2673 | 1.1 | 1.0 | 1.0 | 0.9 | 1.0 | 1.0 | IPF5849      | 9580118..9 unknown function orf19.5496                       | 5849 IPF5849   | TRANSPORT FACILITATION                                                                     |                                    |
| CA2674 | 1.0 | 1.0 | 1.0 | 1.0 | 1.0 | 0.9 | IPF5846      | complemer unknown function orf19.5495                        | 5846 IPF5846   | UNCLASSIFIED PROTEINS                                                                      |                                    |
| CA2675 | 1.1 | 1.0 | 1.0 | 1.1 | 1.1 | 1.0 | GSP1         | 9589303..9 GTP-binding protein (b small G-prc orf19.5493     | 5839 CaGSP1    | TRANSCRIPTION CELLULAR TRANSPORT AND TRANSPORT MECH                                        | hydrolase activity                 |
| CA2676 | 0.9 | 1.0 | 1.0 | 1.0 | 0.9 | 0.9 | YHC1         | complemer SMALL NUCLEAR RIBONUCLEO orf19.5492                | 5838 CaYHC1    | TRANSCRIPTION SUBCELLULAR LOCALISATION                                                     | RNA binding                        |
| CA2677 | 1.0 | 1.0 | 0.9 | 1.1 | 1.0 | 1.0 | ATP14.EXON2  | 9591635..9 F1F0-ATPase complex, subunit h, exon 2 (by        | 5835 CaATP14.ε | ENERGY CELLULAR TRANSPORT AND TRANSPORT MECHANISMS                                         | transporter activity               |
| CA2678 | 0.9 | 1.0 | 1.0 | 1.1 | 1.0 | 1.1 | IPF5834      | 9592274..9 unknown function orf19.1294                       | 5834 IPF5834   | CELL CYCLE AND DNA PROCESSING CONTROL OF CELLULAR ORGANIZATION SUBCELLULAR LO              |                                    |
| CA2679 | 1.0 | 1.1 | 1.0 | 1.0 | 1.0 | 1.1 | IFU5         | 9594892..9 Unknown function orf19.2568                       | 19956 CaIFU5   | UNCLASSIFIED PROTEINS                                                                      | molecular_function unknown         |
| CA2680 | 1.1 | 1.0 | 1.0 | 1.0 | 1.1 | 1.1 | MC14         | 9595886..9 NADH dehydrogenase nadh-ubiqu orf19.2570          | 2728 CaMC14    | No significant S.c. match                                                                  |                                    |
| CA2681 | 1.2 | 1.0 | 1.0 | 1.1 | 1.1 | 1.1 | SEC4         | complemer GTP-binding protein Sec4p [Car orf19.2571          | 2730 CaSEC4    | CELLULAR TRANSPORT AND TRANSPORT MECHANISMS CELL FATE                                      | hydrolase activity                 |

|        |     |     |     |     |     |     |              |                                                             |                  |                                                                                           |                                    |
|--------|-----|-----|-----|-----|-----|-----|--------------|-------------------------------------------------------------|------------------|-------------------------------------------------------------------------------------------|------------------------------------|
| CA2682 | 1.0 | 1.0 | 1.0 | 0.9 | 1.0 | 0.9 | FRS1         | complemer Phenylalanyl-tRNA syr phenylalan; orf19.2573      | 2731 CaFRS1      | PROTEIN SYNTHESIS SUBCELLULAR LOCALISATION                                                | ligase activity                    |
| CA2683 | 1.0 | 1.0 | 1.0 | 1.1 | 1.0 | 1.0 | IFU4         | complemer Unknown function conserved orf19.2574             | 2734 CaiFU4      | UNCLASSIFIED PROTEINS                                                                     | molecular_function unknown         |
| CA2684 | 0.9 | 1.0 | 1.0 | 1.0 | 1.0 | 1.0 | IFU3         | 9603952..9 Unknown function conserved orf19.2575            | 2736 CaiFU3      | CLASSIFICATION NOT YET CLEAR-CUT                                                          | molecular_function unknown         |
| CA2685 | 1.0 | 1.0 | 1.0 | 1.1 | 1.1 | 1.1 | MSH4         | complemer DNA mismatch repair ;DNA mism;orf19.2579          | 2741 CaMSH4      | CELL CYCLE AND DNA PROCESSING SUBCELLULAR LOCALISATION                                    | DNA binding                        |
| CA2686 | 1.0 | 0.9 | 1.0 | 1.1 | 1.0 | 1.0 | HST2         | complemer Transcription regulator transcriptio orf19.2580   | 2743 CaHST2      | TRANSCRIPTION                                                                             | hydrolase activity                 |
| CA2687 | 1.0 | 1.0 | 1.0 | 1.0 | 1.0 | 1.0 | IFU6.3F      | complemer Unknown function, 3-prime end orf19.1011;         | 18435 CaiFU6.3f  | No significant S.c. match                                                                 |                                    |
| CA2688 | 1.0 | 1.0 | 1.0 | 0.9 | 0.9 | 1.0 | IFU6.5F      | complemer Putative ortholog of S. conserved orf19.2581      | 2744 CaiFU6.5f   | Metabolism of vitamins cofactors and prosthetic groups                                    |                                    |
| CA2689 | 1.0 | 1.1 | 1.1 | 1.1 | 1.0 | 1.1 | IFU2         | 9610078..9 Unknown function conserved orf19.2582            | 2746 CaiFU2      | UNCLASSIFIED PROTEINS                                                                     | molecular_function unknown         |
| CA2690 | 0.9 | 1.0 | 0.9 | 1.0 | 1.0 | 0.9 | PTR2.EXON2   | complemer Peptide transporter for di- and tripeptides, exo  | 2747 CaPTR2.e    | No significant S.c. match                                                                 |                                    |
| CA2691 | 0.9 | 1.0 | 1.0 | 1.0 | 1.1 | 1.0 | PTR2.EXON1   | complemer Peptide transporter for peptide trarorf19.2583    | 2749 CaPTR2.e    | CELLULAR TRANSPORT AND TRANSPORT MECHANISMS SUBCELLULAR LOCALISATION TRANSP               |                                    |
| CA2692 | 0.9 | 0.9 | 1.0 | 1.0 | 0.9 | 1.1 | IPF9173.3F   | complemer similar to Saccharomyces cerevisi;orf19.1024i     | 10250 IPF9173.3f | PROTEIN FATE [folding modification destination] ""CELLULAR TRANSPORT AND TRANSPORT MECHAN |                                    |
| CA2693 | 1.0 | 1.0 | 0.9 | 1.1 | 0.9 | 0.9 | IPF9173.5F   | complemer similar to Saccharomyces cerevisi;orf19.1024i     | 9173 IPF9173.5f  | PROTEIN FATE [folding modification destination] ""CELLULAR TRANSP                         | molecular_function unknown         |
| CA2694 | 1.0 | 1.0 | 1.0 | 1.0 | 1.1 | 1.0 | IPF9171      | complemer unknown function orf19.1024i                      | 9171 IPF9171     | CLASSIFICATION NOT YET CLEAR-CUT                                                          |                                    |
| CA2695 | 1.0 | 0.9 | 1.0 | 0.9 | 0.9 | 0.9 | IPF9070      | 9624821..9 similar to Saccharomyces cerevisi;orf19.2735     | 9170 IPF9070     | TRANSCRIPTION SUBCELLULAR LOCALISATION                                                    | RNA binding                        |
| CA2696 | 1.0 | 0.9 | 1.0 | 1.0 | 1.1 | 1.0 | IPF9169      | 9626418..9 similar to Saccharomyces cerevisi;orf19.2736     | 9169 IPF9169     | TRANSCRIPTION SUBCELLULAR LOCALISATION                                                    | transcription regulator activity   |
| CA2697 | 1.0 | 1.0 | 0.9 | 1.2 | 1.1 | 1.3 | IPF9167      | 9627997..9 unknown function orf19.2737                      | 9167 IPF9167     | UNCLASSIFIED PROTEINS                                                                     |                                    |
| CA2698 | 0.9 | 0.9 | 1.0 | 1.1 | 1.0 | 1.0 | SUL1         | 9632399..9 High-affinity sulfate transport proteorf19.1025; | 14417 CaSUL1     | Amino acid metabolism REGULATION OF/INTERACTION WITH CELLU                                | transporter activity               |
| CA2699 | 1.1 | 1.0 | 1.0 | 1.0 | 1.0 | 1.0 | RLF2         | 9635300..9 chromatin assembly complex, sub orf19.1025;      | 19958 CaRLF2     | CELL CYCLE AND DNA PROCESSING ""PROTEIN FATE [folding modifi                              | molecular_function unknown         |
| CA2700 | 1.1 | 1.1 | 1.0 | 1.0 | 1.0 | 1.0 | IPF14414.EXC | 9637300..9 unknown function, exon 1 orf19.1025;             | 17364 IPF14414.ε | No significant S.c. match                                                                 |                                    |
| CA2701 | 1.1 | 1.0 | 0.9 | 1.0 | 1.0 | 1.0 | IPF14414.EXC | 9638870..9 unknown function, exon 2 orf19.1025;             | 15360 IPF14414.ε | TRANSCRIPTION SUBCELLULAR LOCALISATION                                                    |                                    |
| CA2702 | 1.1 | 1.0 | 1.0 | 1.0 | 1.0 | 1.0 | EMP70        | 9644624..9 Endosomal protein (by homology) orf19.1026i      | 14444 CaEMP70    | CELLULAR TRANSPORT AND TRANSPORT MECHANISMS SUBCELL                                       | transporter activity               |
| CA2703 | 1.0 | 1.0 | 1.0 | 1.1 | 1.0 | 1.0 | IPF12193     | 9653983..9 unknown function orf19.4655                      | 12193 IPF12193   | TRANSPORT FACILITATION                                                                    |                                    |
| CA2704 | 1.1 | 1.1 | 1.0 | 1.0 | 1.1 | 0.9 | IPF12195     | complemer unknown function orf19.4656                       | 12195 IPF12195   | No significant S.c. match                                                                 |                                    |
| CA2705 | 1.0 | 0.9 | 1.1 | 1.0 | 1.0 | 0.9 | NEM1         | complemer required for nuclear morphology (t orf19.4657     | 12196 CaNEM1     | CELL CYCLE AND DNA PROCESSING CELL FATE CONTROL OF CEL                                    | molecular_function unknown         |
| CA2706 | 1.0 | 1.0 | 1.0 | 1.0 | 1.0 | 1.0 | IPF11006     | complemer unknown function orf19.4658                       | 11006 IPF11006   | UNCLASSIFIED PROTEINS                                                                     |                                    |
| CA2707 | 1.1 | 1.0 | 1.0 | 1.0 | 1.1 | 1.0 | IPF11003     | 9666525..9 by homology pre-mrna splicing facorf19.4659      | 11003 IPF11003   | TRANSCRIPTION ""PROTEIN FATE [folding modification destination] ""                        | RNA binding                        |
| CA2708 | 1.0 | 1.1 | 1.2 | 1.3 | 1.0 | 1.2 | RPS6A        | complemer ribosomal protein S6 (by homology;orf19.4660      | 11001 CaRPS6A    | PROTEIN SYNTHESIS SUBCELLULAR LOCALISATION                                                | structural molecule activity       |
| CA2709 | 0.9 | 1.0 | 1.0 | 1.0 | 0.9 | 0.9 | IPF4828      | complemer by homology to S. cerevisiae YEA;orf19.4662       | 4828 IPF4828     | TRANSCRIPTION CELL FATE SUBCELLULAR LOCALISATION                                          | DNA binding                        |
| CA2710 | 1.0 | 0.8 | 0.9 | 0.9 | 0.9 | 0.8 | IPF7403      | complemer unknown function orf19.4664                       | 7403 IPF7403     | UNCLASSIFIED PROTEINS                                                                     | molecular_function unknown         |
| CA2711 | 1.1 | 1.0 | 1.0 | 1.0 | 1.0 | 0.9 | TFB3         | complemer Transcription/repair factor (by homorf19.8198     | 18427 CaTFB3     | CELL CYCLE AND DNA PROCESSING TRANSCRIPTION ""PROTEIN I                                   | transcription regulator activity   |
| CA2712 | 0.9 | 1.0 | 1.0 | 1.1 | 1.1 | 1.0 | SPE2         | complemer by homology to S. cerevisiae adenorf19.8199       | 11572 CaSPE2     | Secondary metabolism ""CELL RESCUE DEFENSE AND VIRULENCE 'lyase activity                  |                                    |
| CA2713 | 0.9 | 0.9 | 1.0 | 0.9 | 1.1 | 1.0 | IFF8         | 9680874..9 unknown function orf19.570                       | 11578 CalFF8     | No significant S.c. match                                                                 |                                    |
| CA2714 | 0.9 | 1.1 | 1.0 | 0.9 | 1.0 | 1.0 | IFF2         | 9687390..9 unknown function orf19.575                       | 7360 CalFF2      | UNCLASSIFIED PROTEINS                                                                     |                                    |
| CA2715 | 1.1 | 1.0 | 1.0 | 1.0 | 1.0 | 1.0 | CTF8         | 9691912..9 putative) kinetochore protein (by h orf19.576    | 7354 CaCTF8      | UNCLASSIFIED PROTEINS                                                                     | molecular_function unknown         |
| CA2716 | 1.0 | 1.0 | 1.0 | 1.1 | 1.0 | 1.0 | IPF7353      | complemer unknown function orf19.577                        | 7353 IPF7353     | UNCLASSIFIED PROTEINS                                                                     | molecular_function unknown         |
| CA2717 | 0.9 | 1.0 | 1.0 | 0.9 | 0.9 | 1.0 | MSB3         | 9696404..9 GTPase-activating protein for Sec;orf19.8209     | 7351 CaMSB3      | UNCLASSIFIED PROTEINS                                                                     | enzyme regulator activity          |
| CA2718 | 0.9 | 1.1 | 1.0 | 1.0 | 0.9 | 1.0 | IPF7374      | 9704761..9 unknown function orf19.1084;                     | 7374 IPF7374     | No significant S.c. match                                                                 |                                    |
| CA2719 | 0.9 | 1.0 | 1.0 | 1.0 | 1.0 | 1.0 | SOD2         | complemer Manganese-superoxide manganese orf19.3340         | 7368 CaSOD2      | CELL RESCUE DEFENSE AND VIRULENCE ""SUBCELLULAR LOCAL                                     | oxidoreductase activity            |
| CA2720 | 1.0 | 1.0 | 1.0 | 1.0 | 1.1 | 1.1 | IPF7366      | complemer Arginyl-tRNA synthetase orf19.3341                | 7366 IPF7366     | PROTEIN SYNTHESIS SUBCELLULAR LOCALISATION                                                | ligase activity                    |
| CA2721 | 1.1 | 1.0 | 0.9 | 1.0 | 1.0 | 1.0 | IPF4799      | 9714328..9 unknown Function orf19.3342                      | 4799 IPF4799     | UNCLASSIFIED PROTEINS                                                                     | molecular_function unknown         |
| CA2722 | 1.0 | 1.0 | 1.0 | 1.0 | 0.9 | 1.0 | IPF4801      | 9716406..9 similar to Saccharomyces cerevisi;orf19.3344     | 4801 IPF4801     | PROTEIN FATE [folding modification destination]                                           | molecular_function unknown         |
| CA2723 | 0.9 | 1.0 | 1.0 | 1.1 | 1.0 | 1.1 | IPF4805      | 9718368..9 unknown Function orf19.3345                      | 4805 IPF4805     | PROTEIN FATE [folding modification destination]                                           | ligase activity                    |
| CA2724 | 0.9 | 0.9 | 1.0 | 0.9 | 1.0 | 0.9 | RPB7         | complemer DNA-directed RNA pol RNA polymorf19.1085i         | 4809 CaRPB7      | TRANSCRIPTION ""CELL RESCUE DEFENSE AND VIRULENCE ""SU                                    | nucleotidyltransferase activity    |
| CA2725 | 0.9 | 1.0 | 1.1 | 0.9 | 1.0 | 1.0 | MRPL23A      | 9724136..9 mitochondrial ribosomal protein L2orf19.1085i    | 4810 CaMRPL2     | PROTEIN SYNTHESIS SUBCELLULAR LOCALISATION                                                | structural molecule activity       |
| CA2727 | 1.0 | 1.0 | 1.0 | 1.2 | 1.1 | 1.0 | IPF10318     | complemer similar to Saccharomyces cerevisi;orf19.2119      | 10318 IPF10318   | CELL CYCLE AND DNA PROCESSING                                                             | DNA binding,transcription regulato |
| CA2728 | 1.0 | 1.1 | 1.1 | 0.9 | 1.0 | 1.0 | IPF10322     | 9728491..9 putative mitochondrial carrier proteorf19.9665   | 10322 IPF10322   | Nucleotide metabolism CELLULAR TRANSPORT AND TRANSPORT M                                  | transporter activity               |
| CA2729 | 1.0 | 1.0 | 1.0 | 1.1 | 1.0 | 1.1 | NAT2         | complemer N-acetyltransferase for N-terminal orf19.9664     | 10323 CaNAT2     | PROTEIN SYNTHESIS ""PROTEIN FATE [folding modification destinatio                         | transferase activity               |
| CA2730 | 1.0 | 1.1 | 0.9 | 1.0 | 1.0 | 1.0 | IPF10325     | complemer molybdopterin-converting factor byorf19.9663      | 10325 IPF10325   | Metabolism of vitamins cofactors and prosthetic groups                                    | molecular_function unknown         |
| CA2731 | 1.0 | 1.0 | 1.1 | 1.1 | 1.0 | 1.0 | URIC         | complemer uricase (urate oxidase) (by homolcorf19.2114      | 10326 CaURIC     | No significant S.c. match                                                                 |                                    |
| CA2732 | 1.0 | 1.0 | 1.0 | 1.0 | 1.0 | 1.0 | IPF10327     | complemer unknown function orf19.2113                       | 10327 IPF10327   | UNCLASSIFIED PROTEINS                                                                     | molecular_function unknown         |
| CA2733 | 1.1 | 1.0 | 1.0 | 1.0 | 1.1 | 1.1 | PRP18        | 9734529..9 U5 snRNA-associated protein (by orf19.2112       | 10329 CaPRP18    | TRANSCRIPTION SUBCELLULAR LOCALISATION                                                    | protein binding                    |
| CA2734 | 1.0 | 1.0 | 0.9 | 0.9 | 1.0 | 1.0 | RPL38        | 9735515..9 ribosomal protein L38 (by homology)              | 10330 CaRPL38    | PROTEIN SYNTHESIS SUBCELLULAR LOCALISATION                                                | structural molecule activity       |
| CA2735 | 1.0 | 1.0 | 1.0 | 1.0 | 1.0 | 1.0 | TFG2         | complemer transcription initiation factor TFIIF orf19.2111  | 19765 CaTFG2     | TRANSCRIPTION SUBCELLULAR LOCALISATION                                                    | transcription regulator activity   |
| CA2736 | 1.0 | 1.1 | 1.0 | 0.9 | 0.9 | 1.0 | ATE1         | 9737124..9 arginyl tRNA transferase (by homcorf19.2110      | 15421 CaATE1     | Amino acid metabolism ""PROTEIN FATE [folding modification destinatio                     | transferase activity               |
| CA2737 | 1.1 | 0.9 | 1.1 | 1.1 | 1.0 | 1.1 | IPF15423     | complemer putative superoxide dismutase (by orf19.2108      | 15423 IPF15423   | No significant S.c. match                                                                 |                                    |
| CA2738 | 1.1 | 0.7 | 0.2 | 0.7 | 0.5 | 0.1 | STF2         | 9740300..9 ATP synthase regulatory factor (by homology)     | 15425 CaSTF2     | PROTEIN FATE [folding modification destination]                                           | molecular_function unknown         |
| CA2739 | 1.0 | 1.0 | 1.0 | 1.0 | 1.1 | 1.0 | MUQ1         | complemer choline phosphate cytidylyltransfer orf19.2107    | 10634 CaMUQ1     | Lipid fatty-acid and isoprenoid metabolism                                                | nucleotidyltransferase activity    |
| CA2740 | 1.0 | 1.1 | 1.1 | 1.0 | 1.0 | 1.0 | IPF10633     | complemer unknown function orf19.2106                       | 10633 IPF10633   | UNCLASSIFIED PROTEINS                                                                     | molecular_function unknown         |
| CA2741 | 1.0 | 1.0 | 1.1 | 1.0 | 1.0 | 1.1 | IPF10632     | complemer unknown function orf19.2105                       | 10632 IPF10632   | UNCLASSIFIED PROTEINS                                                                     | molecular_function unknown         |
| CA2742 | 1.0 | 1.0 | 1.1 | 0.9 | 1.0 | 1.0 | JAC1         | 9743500..9 molecular chaperone (by homolog orf19.2104       | 10631 CaJAC1     | ENERGY ""PROTEIN FATE [folding modification destination] ""SUBCELL                        | chaperone activity                 |
| CA2743 | 1.1 | 1.0 | 1.0 | 1.0 | 1.0 | 1.0 | CKB21        | complemer Casein kinase II, beta subunit (by orf19.2102     | 10630 CaCKB21    | TRANSCRIPTION SUBCELLULAR LOCALISATION                                                    | protein kinase activity            |
| CA2744 | 1.1 | 1.0 | 1.0 | 0.9 | 1.0 | 1.0 | IPF10626     | 9745477..9 unknown function orf19.2101                      | 10626 IPF10626   | UNCLASSIFIED PROTEINS                                                                     | molecular_function unknown         |
| CA2745 | 1.0 | 1.0 | 1.0 | 1.1 | 1.0 | 1.0 | HIR1         | complemer Histone transcription regulator (by orf19.9647    | 10625 CaHIR1     | TRANSCRIPTION SUBCELLULAR LOCALISATION                                                    | transcription regulator activity   |
| CA2746 | 1.0 | 1.1 | 0.9 | 1.0 | 1.0 | 0.9 | IPF19766     | 9749207..9 unknown function orf19.9646                      | 19766 IPF19766   | Lipid fatty-acid and isoprenoid metabolism ""CONTROL OF CELLULAR ORGANIZATION             |                                    |
| CA2747 | 1.0 | 1.0 | 1.0 | 0.9 | 1.0 | 1.0 | IPF11467     | complemer unknown function unnamed porf19.2367              | 11467 IPF11467   | UNCLASSIFIED PROTEINS                                                                     | molecular_function unknown         |
| CA2748 | 1.0 | 1.0 | 1.1 | 1.1 | 1.0 | 1.0 | IPF11466     | 9756151..9 unknown function orf19.2368                      | 11466 IPF11466   | CELLULAR TRANSPORT AND TRANSPORT MECHANISMS                                               | protein binding                    |
| CA2749 | 1.0 | 1.0 | 1.0 | 1.0 | 1.0 | 1.0 | IPF11465     | complemer unknown function orf19.2369                       | 11465 IPF11465   | CELL CYCLE AND DNA PROCESSING TRANSCRIPTION CELL FATE                                     | DNA binding                        |
| CA2750 | 0.9 | 1.1 | 1.0 | 1.0 | 1.0 | 1.0 | ATX1         | 9759522..9 antioxidant protein and metal homeostasis fac    | 11464 CaATX1     | CELL RESCUE DEFENSE AND VIRULENCE ""REGULATION OF/INTEI                                   | chaperone activity                 |
| CA2751 | 1.0 | 0.9 | 1.0 | 1.0 | 1.0 | 1.0 | IPF19558     | complemer unknown function orf19.2370                       | 19558 IPF19558   | UNCLASSIFIED PROTEINS                                                                     | molecular_function unknown         |
| CA2752 | 1.1 | 1.0 | 1.1 | 1.0 | 1.0 | 1.0 | IPF6238      | 9768682..9 GAG protein of retrotransposon pcorf19.2374      | 6238 IPF6238     | No significant S.c. match                                                                 |                                    |
| CA2753 | 0.9 | 1.0 | 1.0 | 1.0 | 1.0 | 1.0 | IPF16806     | 9772787..9 unknown function orf19.1306;                     | 16806 IPF16806   | UNCLASSIFIED PROTEINS                                                                     | protein binding                    |
| CA2754 | 1.0 | 1.0 | 1.0 | 1.0 | 1.1 | 1.0 | VPS45        | complemer vacuolar protein sorting-associatcorf19.1306;     | 12432 CaVPS45    | PROTEIN FATE [folding modification destination] ""CELLULAR TRANSP                         | chaperone activity                 |

|        |     |     |     |     |     |     |           |                                                         |                       |       |           |                                                                        |                                              |
|--------|-----|-----|-----|-----|-----|-----|-----------|---------------------------------------------------------|-----------------------|-------|-----------|------------------------------------------------------------------------|----------------------------------------------|
| CA2755 | 1.0 | 1.0 | 0.9 | 0.9 | 1.0 | 1.0 | 1FA12     | 9777121..9 unknown function                             | orf19.1306            | 12435 | Ca1FA12   | No significant S.c. match                                              |                                              |
| CA2756 | 1.0 | 0.9 | 1.0 | 1.0 | 1.1 | 1.0 | IPF18418  | 9779713..9 unknown function                             | hypothetic orf19.1306 | 18418 | IPF18418  | UNCLASSIFIED PROTEINS                                                  | molecular_function unknown                   |
| CA2757 | 1.0 | 1.0 | 1.0 | 1.0 | 1.0 | 1.1 | IPF19767  | complemer unknown function                              | orf19.1306            | 19767 | IPF19767  | UNCLASSIFIED PROTEINS                                                  | molecular_function unknown                   |
| CA2758 | 1.1 | 1.0 | 1.1 | 1.0 | 1.1 | 1.1 | GLC3      | complemer 1,4-glucan branching enzyme (by               | orf19.1306            | 16449 | CaGLC3    | C-compound and carbohydrate metabolism                                 | ENERGY SUBCELLULAR LOCALISATION              |
| CA2759 | 1.3 | 1.1 | 1.0 | 1.0 | 1.1 | 0.9 | ARP4      | complemer actin-related protein (by homology            | orf19.1306            | 13789 | CaARP4    | CONTROL OF CELLULAR ORGANIZATION                                       | SUBCELLULAR LOCALISATION                     |
| CA2760 | 0.9 | 1.0 | 1.0 | 1.2 | 1.3 | 1.0 | IPF13790  | complemer Unknown function                              | orf19.1307            | 13790 | IPF13790  | No significant S.c. match                                              |                                              |
| CA2761 | 1.1 | 0.9 | 0.7 | 0.7 | 1.0 | 0.9 | IPF15013  | 9793468..9 pyruvate decarboxylase regulatory            | orf19.1307            | 15013 | IPF15013  | No significant S.c. match                                              |                                              |
| CA2762 | 1.0 | 1.0 | 1.0 | 1.0 | 1.0 | 0.9 | IPF15012  | 9795542..9 pre mRNA splicing factor (by hom             | orf19.1307            | 15012 | IPF15012  | UNCLASSIFIED PROTEINS                                                  | RNA binding                                  |
| CA2763 | 1.1 | 1.1 | 1.0 | 1.1 | 1.0 | 1.0 | DIC1.3    | 9797980..9 dicarboxylate carrier protein, 3-pr          | orf19.5628            | 16773 | CaDIC1.3  | Phosphate metabolism C-compound and carbohydrate metabolism            | CELL transporter activity                    |
| CA2764 | 1.1 | 1.3 | 1.0 | 0.9 | 1.0 | 1.1 | QCR7      | complemer ubiquinol--cytochrome-c reductase             | orf19.5629            | 16775 | CaQCR7    | ENERGY ""PROTEIN FATE [folding modification destination] ""            | SUBCELL transporter activity, oxidoreductase |
| CA2765 | 0.9 | 1.0 | 1.0 | 1.0 | 1.0 | 1.0 | APA2      | complemer ATP adenyllyltransferase II (by hom           | orf19.1307            | 18417 | CaAPA2    | Nucleotide metabolism                                                  | hydrolase activity                           |
| CA2766 | 1.0 | 1.0 | 1.1 | 1.0 | 1.0 | 0.9 | IPF18416  | 9801246..9 unknown function                             | orf19.1307            | 18416 | IPF18416  | No significant S.c. match                                              |                                              |
| CA2767 | 1.2 | 1.3 | 1.0 | 1.0 | 1.0 | 1.0 | TOA1      | complemer transcription initiation factor IIA (by       | orf19.2682            | 14884 | CaTOA1    | TRANSCRIPTION SUBCELLULAR LOCALISATION                                 | transcription regulator activity             |
| CA2768 | 1.0 | 0.9 | 1.0 | 1.0 | 1.0 | 1.0 | IPF17011  | complemer similar to Saccharomyces cerevisi             | orf19.2684            | 17011 | IPF17011  | CELL CYCLE AND DNA PROCESSING                                          | molecular_function unknown                   |
| CA2769 | 0.9 | 0.9 | 1.3 | 1.4 | 1.2 | 1.0 | IPF15870  | complemer unknown function                              | orf19.2685            | 15870 | IPF15870  | No significant S.c. match                                              |                                              |
| CA2770 | 1.0 | 1.0 | 1.1 | 1.0 | 1.1 | 1.0 | CPS1      | 9815697..9 Carboxypeptidase YSCS precursor              | orf19.2686            | 7980  | CaCPS1    | Nitrogen and sulphur metabolism ""PROTEIN FATE [folding modification   | peptidase activity                           |
| CA2771 | 1.0 | 1.0 | 1.0 | 0.9 | 0.9 | 1.0 | RPB10     | complemer DNA-directed RNA polymerase II (by homolog    |                       | 7977  | CaRPB10   | TRANSCRIPTION SUBCELLULAR LOCALISATION                                 | nucleotidyltransferase activity              |
| CA2772 | 1.1 | 1.1 | 1.0 | 1.0 | 1.0 | 1.0 | IPF20112  | 9818217..9 unknown function                             | orf19.2688            | 20112 | IPF20112  | CELL CYCLE AND DNA PROCESSING SUBCELLULAR LOCALISATION                 | RNA binding                                  |
| CA2773 | 1.1 | 1.0 | 1.0 | 1.0 | 1.1 | 1.1 | MGM1      | complemer GTPase                                        | orf19.2690            | 7974  | CaMGM1    | SUBCELLULAR LOCALISATION                                               | hydrolase activity                           |
| CA2774 | 1.0 | 1.1 | 1.0 | 1.0 | 0.9 | 0.9 | TFC4      | 9827896..9 transcription factor IIIC chain TFC          | orf19.274             | 10122 | CaTFC4    | TRANSCRIPTION SUBCELLULAR LOCALISATION                                 | transcription regulator activity             |
| CA2775 | 1.1 | 1.0 | 1.0 | 1.1 | 1.0 | 1.0 | POP5      | 9831324..9 subunit of RNase P- like by homolog          | orf19.275             | 10123 | CaPOP5    | CELL CYCLE AND DNA PROCESSING TRANSCRIPTION SUBCELLUL                  | RNA binding                                  |
| CA2776 | 1.1 | 1.0 | 1.0 | 1.0 | 1.1 | 1.0 | IPF10124  | complemer Alcohol acetyltransferase (by homolog         | orf19.276             | 10124 | IPF10124  | UNCLASSIFIED PROTEINS                                                  | molecular_function unknown                   |
| CA2777 | 1.0 | 1.0 | 1.0 | 0.9 | 0.9 | 0.9 | THI6      | 9833961..9 thiamin-phosphate pyrophosphory              | orf19.277             | 10126 | CaTHI6    | Metabolism of vitamins cofactors and prosthetic groups                 | transferase activity                         |
| CA2778 | 1.0 | 1.0 | 1.0 | 1.0 | 1.0 | 1.0 | MTR       | complemer neutral amino acid permease-like              | orf19.278             | 10127 | CaMTR     | UNCLASSIFIED PROTEINS                                                  |                                              |
| CA2779 | 1.0 | 1.0 | 1.0 | 1.1 | 0.9 | 0.9 | IPF3836   | 9837627..9 unknown function                             | orf19.279             | 19768 | IPF3836   | UNCLASSIFIED PROTEINS                                                  | hydrolase activity                           |
| CA2780 | 1.1 | 0.9 | 1.0 | 0.9 | 1.0 | 1.0 | IPF3831   | 9838807..9 unknown function                             | orf19.281             | 3798  | IPF3831   | No significant S.c. match                                              |                                              |
| CA2781 | 0.9 | 1.0 | 1.0 | 1.1 | 1.0 | 1.1 | IPF3821   | 9840046..9 unknown function                             | orf19.284             | 3805  | IPF3821   | No significant S.c. match                                              |                                              |
| CA2782 | 1.4 | 1.8 | 0.9 | 0.9 | 1.0 | 0.9 | IPF3806   | 9840952..9 unknown function                             | orf19.285             | 3806  | IPF3806   | UNCLASSIFIED PROTEINS                                                  | molecular_function unknown                   |
| CA2783 | 0.9 | 0.9 | 1.1 | 1.1 | 1.0 | 1.1 | IPF3808   | 9841819..9 unknown function                             | orf19.286             | 3808  | IPF3808   | PROTEIN FATE [folding modification destination]                        |                                              |
| CA2784 | 1.0 | 1.0 | 1.0 | 1.0 | 1.0 | 1.0 | IPF3810   | complemer unknown function                              | orf19.287             | 3810  | IPF3810   | No significant S.c. match                                              |                                              |
| CA2785 | 0.9 | 0.9 | 0.9 | 1.0 | 1.0 | 1.1 | MET13     | complemer Methylene tetrahydrofolate reduct             | orf19.288             | 3814  | CaMET13   | Amino acid metabolism ""Metabolism of vitamins cofactors and prostheti | structural molecule activity                 |
| CA2786 | 1.0 | 1.0 | 1.0 | 1.0 | 1.0 | 1.0 | KRE5.3EOC | complemer UDP-glucose:glycoprotein glucosyl             | orf19.290             | 3818  | CaKRE5.3  | C-compound and carbohydrate metabolism                                 | CELL FATE SUBCELLULAR transferase activity   |
| CA2787 | 1.1 | 1.1 | 1.1 | 1.1 | 1.2 | 1.1 | EFG1      | 9858262..9 Enhanced filamentous putative tra            | orf19.8243            | 3577  | CaEFG1    | TRANSCRIPTION CELLULAR COMMUNICATION/SIGNAL TRANSDUC                   | DNA binding, transcription regulato          |
| CA2788 | 1.0 | 1.0 | 1.0 | 1.0 | 1.0 | 1.0 | RAD26     | complemer DNA repair and recombination pro              | orf19.8240            | 3569  | CaRAD26   | CELL CYCLE AND DNA PROCESSING SUBCELLULAR LOCALISATIO                  | hydrolase activity                           |
| CA2789 | 0.9 | 1.1 | 1.0 | 0.9 | 1.0 | 1.0 | IPF3567   | 9865948..9 unknown function                             | orf19.606             | 3567  | IPF3567   | UNCLASSIFIED PROTEINS                                                  | molecular_function unknown                   |
| CA2790 | 1.0 | 1.1 | 1.0 | 1.0 | 1.0 | 1.2 | IPF3562   | 9869139..9 Unknown function                             | orf19.604             | 3562  | IPF3562   | Metabolism of vitamins cofactors and prosthetic groups                 |                                              |
| CA2791 | 1.0 | 1.1 | 1.1 | 1.0 | 0.9 | 0.9 | IMP4      | 9871684..9 Ribonucleoprotein (by homology)              | orf19.603             | 3560  | CaIMP4    | TRANSCRIPTION                                                          | RNA binding                                  |
| CA2792 | 1.0 | 0.9 | 1.0 | 1.0 | 1.1 | 0.9 | TRK1.3F   | complemer Potassium transporter, 3-prime en             | orf19.602             | 3559  | CaTRK1.3  | CELLULAR TRANSPORT AND TRANSPORT MECHANISMS SUBCELLULAR LOCALISATION   | TRANSPOR                                     |
| CA2793 | 1.0 | 0.9 | 1.0 | 1.0 | 1.0 | 0.9 | TRK1.5F   | complemer Potassium transporter, potassium              | orf19.8233            | 3557  | CaTRK1.5  | CELLULAR TRANSPORT AND TRANSPORT MECHANISMS SUBCELL                    | transporter activity                         |
| CA2794 | 0.9 | 1.0 | 1.0 | 1.0 | 1.0 | 1.0 | IPF8408   | 9887619..9 unknown function                             | orf19.1724            | 8408  | IPF8408   | No significant S.c. match                                              |                                              |
| CA2795 | 0.9 | 1.0 | 1.0 | 1.0 | 1.0 | 1.0 | IPF8407   | 9888306..9 unknown function                             | orf19.1723            | 8407  | IPF8407   | UNCLASSIFIED PROTEINS                                                  | molecular_function unknown                   |
| CA2796 | 1.2 | 1.3 | 1.0 | 0.9 | 1.0 | 1.1 | IPF8405   | complemer similar to Saccharomyces cerevisi             | orf19.1721            | 8405  | IPF8405   | CELLULAR TRANSPORT AND TRANSPORT MECHANISMS                            | molecular_function unknown                   |
| CA2797 | 0.9 | 1.0 | 1.0 | 1.0 | 1.0 | 1.0 | IPF8404   | 9891254..9 putative helicase (by homology)              | orf19.1720            | 8404  | IPF8404   | CELL CYCLE AND DNA PROCESSING                                          | helicase activity                            |
| CA2798 | 1.0 | 1.1 | 1.0 | 1.0 | 1.0 | 0.9 | IPF8402   | complemer similar to Saccharomyces cerevisi             | orf19.1719            | 8402  | IPF8402   | C-compound and carbohydrate metabolism                                 | CELL FATE SUBCELLULAR hydrolase activity     |
| CA2799 | 0.9 | 1.0 | 0.9 | 1.0 | 1.0 | 1.1 | IPF19769  | 9899194..9 unknown function                             | orf19.1718            | 19769 | IPF19769  | No significant S.c. match                                              |                                              |
| CA2800 | 1.0 | 0.9 | 1.0 | 1.0 | 1.0 | 0.9 | IPF11366  | 9902499..9 unknown function                             | orf19.1717            | 11366 | IPF11366  | No significant S.c. match                                              |                                              |
| CA2801 | 1.0 | 1.1 | 1.1 | 1.0 | 1.0 | 1.0 | URA3      | complemer orotidine-5 -monophosphate decar              | orf19.1716            | 11364 | CaURA3    | Nucleotide metabolism                                                  | lyase activity                               |
| CA2802 | 1.0 | 1.0 | 1.1 | 1.2 | 1.2 | 1.2 | IPF11363  | complemer unknown function                              | orf19.9283            | 11363 | IPF11363  | No significant S.c. match                                              |                                              |
| CA2803 | 1.1 | 1.1 | 1.0 | 1.2 | 1.0 | 1.0 | IPF11711  | 9909449..9 ubiquitin-protein ligase (by homolog         | orf19.5776            | 11711 | IPF11711  | CELL CYCLE AND DNA PROCESSING                                          | ligase activity                              |
| CA2804 | 0.9 | 1.0 | 0.9 | 0.9 | 1.0 | 1.0 | IPF19961  | complemer unknown function                              | orf19.5777            | 19961 | IPF19961  | UNCLASSIFIED PROTEINS                                                  | molecular_function unknown                   |
| CA2805 | 1.0 | 0.9 | 0.9 | 0.9 | 1.1 | 1.0 | RNR1      | 9914611..9 ribonucleoside-diphosphate reduct            | orf19.5779            | 11704 | CaRNR1    | Nucleotide metabolism                                                  | CELL CYCLE AND DNA PROCESSING                |
| CA2806 | 1.1 | 1.1 | 1.0 | 0.9 | 1.0 | 0.9 | IPF11702  | 9918043..9 unknown function                             | orf19.5780            | 11702 | IPF11702  | UNCLASSIFIED PROTEINS                                                  | oxidoreductase activity                      |
| CA2807 | 1.2 | 1.2 | 1.1 | 1.1 | 1.2 | 1.1 | IPF11965  | 9920339..9 unknown function                             | orf19.5782            | 11965 | IPF11965  | UNCLASSIFIED PROTEINS                                                  | molecular_function unknown                   |
| CA2808 | 1.0 | 1.0 | 1.0 | 1.0 | 1.0 | 1.0 | IPF11966  | complemer unknown function                              | orf19.5783            | 11966 | IPF11966  | UNCLASSIFIED PROTEINS                                                  | hydrolase activity                           |
| CA2809 | 0.9 | 1.1 | 0.9 | 1.0 | 1.0 | 1.1 | AMO1      | complemer amine oxidase (by homology)                   | orf19.5784            | 11969 | CaAMO1    | No significant S.c. match                                              |                                              |
| CA2810 | 1.1 | 1.2 | 1.1 | 1.0 | 1.1 | 1.1 | EFT2      | complemer translation elongation f translation          | orf19.5788            | 6840  | CaEFT2    | PROTEIN SYNTHESIS SUBCELLULAR LOCALISATION                             | translation regulator activity               |
| CA2811 | 1.2 | 1.4 | 1.5 | 1.7 | 1.2 | 1.3 | RPS10     | complemer Ribosomal protein 10 ribosomal                | orf19.1052            | 5347  | CaRPS10   | PROTEIN SYNTHESIS SUBCELLULAR LOCALISATION                             | structural molecule activity                 |
| CA2812 | 1.1 | 1.0 | 1.0 | 1.0 | 1.1 | 0.9 | TEM1      | 9937411..9 GTP-binding protein of the RAS su            | orf19.1051            | 5346  | CaTEM1    | CELL CYCLE AND DNA PROCESSING CELLULAR COMMUNICATION                   | protein binding                              |
| CA2813 | 0.9 | 0.9 | 1.0 | 1.1 | 1.0 | 1.0 | ORC1      | 9938442..9 Origin recognition com origin reco           | orf19.1051            | 5612  | CaORC1    | CELL CYCLE AND DNA PROCESSING TRANSCRIPTION                            | CELL FATE                                    |
| CA2814 | 1.0 | 0.9 | 0.9 | 0.9 | 1.0 | 1.0 | IPF5607   | 9941036..9 unknown function                             | orf19.2998            | 5607  | IPF5607   | UNCLASSIFIED PROTEINS                                                  | molecular_function unknown                   |
| CA2815 | 1.0 | 1.0 | 1.0 | 1.0 | 1.0 | 1.0 | IPF5604   | complemer unknown function                              | orf19.2996            | 5604  | IPF5604   | CONTROL OF CELLULAR ORGANIZATION                                       | molecular_function unknown                   |
| CA2816 | 0.9 | 0.9 | 1.0 | 1.0 | 1.0 | 1.0 | IPF5601   | complemer unknown function                              | orf19.2995            | 5601  | IPF5601   | UNCLASSIFIED PROTEINS                                                  | molecular_function unknown                   |
| CA2817 | 1.0 | 1.1 | 0.9 | 0.9 | 1.0 | 1.1 | RPS16.3   | complemer ribosomal protein, 3-pr 40S ribosomal protein |                       | 5598  | CaRPS16.3 | PROTEIN SYNTHESIS SUBCELLULAR LOCALISATION                             | structural molecule activity                 |
| CA2818 | 1.1 | 1.4 | 0.9 | 1.0 | 1.0 | 1.0 | RPL13     | 9948383..9 Ribosomal protein ribosomal                  | orf19.2994            | 5596  | CaRPL13   | PROTEIN SYNTHESIS SUBCELLULAR LOCALISATION                             | structural molecule activity                 |
| CA2819 | 1.1 | 1.5 | 0.8 | 1.3 | 1.0 | 0.9 | RPA1      | complemer 60S ribosomal protein 60S acidic              | orf19.2992            | 5594  | CaRPA1    | PROTEIN SYNTHESIS SUBCELLULAR LOCALISATION                             | structural molecule activity                 |
| CA2820 | 1.0 | 0.9 | 1.2 | 1.0 | 0.9 | 1.0 | HOL1      | complemer member of major facilit transport             | orf19.2991            | 5592  | CaHOL1    | CELL RESCUE DEFENSE AND VIRULENCE ""TRANSPORT FACILITATION             |                                              |
| CA2821 | 1.0 | 1.1 | 1.0 | 1.0 | 1.0 | 1.1 | CDR3.3EOC | 9955198..9 Opaque-specific ABC transporter, 3-prime enc |                       | 17152 | CaCDR3.3  | SUBCELLULAR LOCALISATION TRANSPORT FACILITATION                        |                                              |
| CA2822 | 1.0 | 1.0 | 1.0 | 1.0 | 1.1 | 1.0 | IPF14550  | 9957534..9 unknown function                             | orf19.1314            | 17153 | IPF14550  | UNCLASSIFIED PROTEINS                                                  |                                              |
| CA2823 | 1.1 | 1.0 | 0.9 | 0.9 | 1.0 | 1.0 | IPF14554  | 9960135..9 similar to Saccharomyces cerevisi            | orf19.1317            | 14554 | IPF14554  | Lipid fatty-acid and isoprenoid metabolism                             |                                              |
| CA2824 | 1.1 | 1.0 | 1.0 | 1.0 | 0.9 | 1.0 | IPF17888  | complemer unknown function                              | orf19.1318            | 17888 | IPF17888  | UNCLASSIFIED PROTEINS                                                  | molecular_function unknown                   |
| CA2825 | 1.0 | 1.0 | 1.1 | 1.0 | 1.0 | 1.0 | HWP1      | complemer Hyphal wall protein                           | orf19.1321            | 12916 | CaHWP1    | C-compound and carbohydrate metabolism                                 | SUBCELLULAR LOCALISATION Hypha-specific      |
| CA2826 | 1.1 | 1.1 | 1.0 | 1.0 | 0.9 | 1.0 | APL6      | complemer AP-3 complex subunit, beta3-adap              | orf19.1323            | 12906 | CaAPL6    | CELLULAR TRANSPORT AND TRANSPORT MECHANISMS SUBCELL                    | molecular_function unknown                   |

|        |     |     |     |     |     |     |              |                                                           |            |       |            |                                                       |                                                                |
|--------|-----|-----|-----|-----|-----|-----|--------------|-----------------------------------------------------------|------------|-------|------------|-------------------------------------------------------|----------------------------------------------------------------|
| CA2827 | 1.0 | 1.0 | 1.1 | 1.1 | 1.0 | 1.0 | RAD2         | complemer structure-specific nuclease of the              | orf19.1324 | 19770 | CaRAD2     | CELL CYCLE AND DNA PROCESSING SUBCELLULAR LOCALISATIO | DNA binding                                                    |
| CA2828 | 1.0 | 1.0 | 1.0 | 1.0 | 0.9 | 1.0 | IPF17026     | 9974890..unknown function                                 | orf19.1325 | 17026 | IPF17026   | Amino acid metabolism                                 | CELL CYCLE AND DNA PROCESSING CONTROL OF CELLULAR ORGANIZATI   |
| CA2829 | 1.0 | 0.9 | 0.9 | 1.0 | 0.9 | 1.1 | IFA7         | complemer unknown function                                | orf19.1326 | 14593 | CaIFA7     | Nucleotide metabolism                                 | CELL CYCLE AND DNA PROCESSING CELLULAR COMMUNICATION/SIGNAL T  |
| CA2830 | 1.0 | 1.0 | 1.0 | 1.0 | 1.0 | 1.0 | RBT1         | 9982188..repressed by TUP1 protein 1                      | orf19.1327 | 15385 | CaRBT1     | Hypha-specific                                        | No significant S.c. match                                      |
| CA2831 | 0.9 | 0.9 | 1.1 | 1.0 | 1.0 | 1.0 | IPF15706     | complemer unknown function                                | orf19.4783 | 15706 | IPF15706   | €                                                     | No significant S.c. match                                      |
| CA2832 | 1.1 | 1.1 | 1.1 | 1.0 | 1.0 | 1.0 | CRD1         | 9988871..9 Cu-transporting P1-type ATPase                 | orf19.4784 | 19962 | CaCRD1     | REGULATION OF/INTERACTION WITH CELLULAR ENVIRONMENT   | SUBCELLULAR LOCALISATION TF                                    |
| CA2833 | 1.0 | 0.9 | 0.9 | 1.0 | 1.0 | 1.0 | PTC1         | complemer protein serine/threonine phosphate              | orf19.4785 | 19963 | CaPTC1     | C-compound and carbohydrate metabolism                | ""CELL RESCUE DEFENSE protein phosphatase activity             |
| CA2834 | 1.0 | 1.0 | 1.1 | 1.0 | 0.9 | 1.0 | IPF12093     | 9994618..9 unknown function                               | orf19.4786 | 12093 | IPF12093   | UNCLASSIFIED PROTEINS                                 |                                                                |
| CA2835 | 1.0 | 1.0 | 1.0 | 1.0 | 1.0 | 1.0 | IPF12091     | 9996734..9 Unknown function                               | orf19.4787 | 12091 | IPF12091   | CELL CYCLE AND DNA PROCESSING                         | ""PROTEIN FATE [folding modification destination] ""CELLULAR T |
| CA2836 | 1.0 | 1.1 | 1.0 | 0.9 | 1.0 | 1.1 | ARG5.6       | complemer acetylglutamate kinase and acetyl               | orf19.4788 | 12088 | CaARG5.6   | Amino acid metabolism                                 | SUBCELLULAR LOCALISATION                                       |
| CA2837 | 1.0 | 1.0 | 1.0 | 1.1 | 1.0 | 1.0 | IPF8340      | complemer unknown function                                | orf19.4789 | 8340  | IPF8340    | No significant S.c. match                             | oxidoreductase activity,transferase                            |
| CA2838 | 1.1 | 1.0 | 1.0 | 1.0 | 1.0 | 1.0 | IPF8339      | complemer unknown function                                | orf19.4791 | 8339  | IPF8339    | No significant S.c. match                             |                                                                |
| CA2839 | 1.0 | 0.8 | 1.0 | 1.1 | 1.0 | 1.1 | IPF8336      | complemer unknown function                                | orf19.4792 | 8336  | IPF8336    | No significant S.c. match                             |                                                                |
| CA2841 | 1.0 | 1.0 | 1.0 | 1.0 | 1.0 | 0.9 | IPF12981     | 10012740..unknown function                                | orf19.5727 | 12981 | IPF12981   | No significant S.c. match                             |                                                                |
| CA2842 | 1.0 | 1.0 | 0.9 | 0.9 | 1.0 | 0.9 | ALK5.3F      | complemer n-alkane-inducible cytochrome P-450, 3-prime    | orf19.5728 | 18405 | CaALK5.3F  | CELL RESCUE DEFENSE AND VIRULENCE                     | ""CELL FATE CONTROL OF CELLULAR ORGANIZATION                   |
| CA2843 | 1.0 | 1.0 | 1.0 | 1.0 | 1.0 | 1.0 | ALK5.5F      | complemer n-alkane-inducible cytochrome P-4               | orf19.5728 | 13156 | CaALK5.5F  | CELL RESCUE DEFENSE AND VIRULENCE                     | ""CELL FATE CONTROL OF CELLULAR ORGANIZATION                   |
| CA2844 | 0.9 | 1.0 | 0.9 | 1.0 | 1.0 | 1.0 | IPF13158     | 10021410..unknown function                                | orf19.5729 | 13158 | IPF13158   | Amino acid metabolism                                 | TRANSCRIPTION SUBCELLULAR LOCALISATION                         |
| CA2845 | 1.0 | 1.0 | 1.1 | 0.9 | 1.0 | 1.1 | IPF10782     | complemer unknown function                                | orf19.5730 | 10782 | IPF10782   | UNCLASSIFIED PROTEINS                                 | molecular_function unknown                                     |
| CA2846 | 1.1 | 1.0 | 0.9 | 1.0 | 1.0 | 1.1 | PAD1         | 10025559..phenylacrylic acid decarboxylase                | orf19.5731 | 10783 | CaPAD1     | CELL RESCUE DEFENSE AND VIRULENCE                     | lyase activity                                                 |
| CA2847 | 1.0 | 1.0 | 1.1 | 1.1 | 1.1 | 1.0 | IPF10785.EXC | 10026553..unknown function, exon 1                        | orf19.5732 | 10785 | IPF10785.€ | UNCLASSIFIED PROTEINS                                 | hydrolase activity                                             |
| CA2848 | 1.0 | 1.0 | 1.0 | 1.1 | 1.0 | 1.1 | IPF10785.EXC | 10028105..unknown function, exon 2                        | orf19.5733 | 10786 | IPF10785.€ | UNCLASSIFIED PROTEINS                                 |                                                                |
| CA2849 | 1.0 | 1.0 | 0.9 | 1.0 | 1.0 | 1.0 | POP2         | complemer required for glucose derepression               | orf19.5734 | 10787 | CaPOP2     | C-compound and carbohydrate metabolism                | TRANSCRIPTION CELL FA' RNA binding                             |
| CA2850 | 1.0 | 1.0 | 1.0 | 0.9 | 1.0 | 1.0 | CDC50        | complemer cell division cycle mutant (by hom              | orf19.5735 | 10789 | CaCDC50    | CELL CYCLE AND DNA PROCESSING                         | transcription regulator activity                               |
| CA2852 | 1.0 | 1.0 | 1.0 | 1.1 | 1.0 | 1.0 | ALS5         | complemer agglutinin-like protein agglutinin-I            | orf19.5736 | 19771 | CaALS5     | CELL FATE SUBCELLULAR LOCALISATION                    | Other virulence attributes                                     |
| CA2853 | 1.0 | 0.9 | 0.9 | 1.1 | 0.9 | 1.0 | IPF17057     | 10043344..unknown function                                | orf19.1070 | 17057 | IPF17057   | UNCLASSIFIED PROTEINS                                 | molecular_function unknown                                     |
| CA2854 | 1.1 | 1.1 | 1.0 | 1.0 | 1.0 | 1.2 | RPN4         | complemer 26S proteasome subunit (by hom                  | orf19.1069 | 7070  | CaRPN4     | PROTEIN FATE [folding modification destination]       | ""SUBCELLULAR LOC                                              |
| CA2855 | 1.0 | 1.0 | 1.0 | 1.0 | 1.0 | 1.0 | GPM2         | complemer phosphoglycerate mutase (by hom                 | orf19.1067 | 7065  | CaGPM2     | C-compound and carbohydrate metabolism                | ENERGY SUBCELLULAR LOCALISATION                                |
| CA2856 | 0.9 | 0.9 | 1.0 | 1.0 | 1.0 | 1.1 | IPF7062      | 10050750..unknown function                                | orf19.1066 | 7062  | IPF7062    | UNCLASSIFIED PROTEINS                                 | molecular_function unknown                                     |
| CA2857 | 1.0 | 1.0 | 1.1 | 1.1 | 1.0 | 1.0 | SSA1         | 10052114..Heat shock protein of HSP70 fami                | orf19.1065 | 7060  | CaSSA1     | CELL RESCUE DEFENSE AND VIRULENCE                     | ""SUBCELLULAR LOCALISATION                                     |
| CA2858 | 1.2 | 1.1 | 1.1 | 1.3 | 1.2 | 1.4 | ACS2         | 10056401..acetyl-coenzyme-A synthetase (by                | orf19.1064 | 7057  | CaACS2     | C-compound and carbohydrate metabolism                | ENERGY                                                         |
| CA2859 | 1.0 | 1.0 | 1.0 | 1.0 | 0.9 | 1.0 | IPF7056      | 10058692..unknown function                                | orf19.1063 | 7056  | IPF7056    | UNCLASSIFIED PROTEINS                                 | molecular_function unknown                                     |
| CA2860 | 1.0 | 1.0 | 1.1 | 1.0 | 0.9 | 1.2 | IPF7054      | 10060272..unknown function                                | orf19.1062 | 7054  | IPF7054    | No significant S.c. match                             |                                                                |
| CA2861 | 1.1 | 0.9 | 0.7 | 1.1 | 1.0 | 1.3 | HHT21        | complemer Histone H3                                      | orf19.1061 | 7053  | CaHHT21    | TRANSCRIPTION SUBCELLULAR LOCALISATION                | DNA binding                                                    |
| CA2862 | 1.0 | 0.8 | 0.5 | 1.1 | 0.8 | 1.2 | HHF21        | 10063170..histone H4                                      | orf19.1059 | 7050  | CaHHF21    | TRANSCRIPTION SUBCELLULAR LOCALISATION                | DNA binding                                                    |
| CA2863 | 1.0 | 1.0 | 1.0 | 1.0 | 1.0 | 1.1 | IPF20117     | complemer unknown function                                | orf19.1058 | 20117 | IPF20117   | UNCLASSIFIED PROTEINS                                 | peptidase activity                                             |
| CA2864 | 1.1 | 1.0 | 1.0 | 1.0 | 0.9 | 1.0 | IPF17234.3   | 10065092..unknown function, 3-prime end                   | orf19.1057 | 17234 | IPF17234.3 | No significant S.c. match                             |                                                                |
| CA2866 | 1.0 | 1.0 | 1.0 | 1.2 | 1.0 | 1.0 | RHO1         | complemer GTP-binding protein of the rho sub              | orf19.2843 | 11690 | CaRHO1     | C-compound and carbohydrate metabolism                | CELLULAR COMMUNICATI                                           |
| CA2867 | 1.0 | 0.9 | 1.0 | 0.9 | 1.0 | 1.0 | IPF11688     | 10079064..similar to Saccharomyces cerevisi               | orf19.2844 | 11688 | IPF11688   | PROTEIN FATE [folding modification destination]       | ""CELLULAR TRANSP                                              |
| CA2868 | 1.0 | 1.0 | 1.0 | 1.0 | 1.0 | 1.1 | IPF20118     | 10082128..unknown function                                | orf19.2846 | 20118 | IPF20118   | No significant S.c. match                             |                                                                |
| CA2869 | 1.0 | 1.0 | 1.1 | 1.0 | 1.1 | 0.8 | RPC82        | complemer DNA-directed RNA polymerase III,                | orf19.2847 | 15457 | CaRPC82    | TRANSCRIPTION SUBCELLULAR LOCALISATION                | nucleotidyltransferase activity                                |
| CA2870 | 1.0 | 1.0 | 1.0 | 0.9 | 1.0 | 1.0 | OPT2.53F     | 10084983..Oligopeptide transporter, internal fragment (by | orf19.2847 | 17923 | CaOPT2.53F | TRANSPORT FACILITATION                                |                                                                |
| CA2871 | 1.0 | 1.1 | 0.9 | 1.0 | 1.0 | 1.1 | OPT2.3F      | 10085454..Oligopeptide transporter, 3-prime               | orf19.2847 | 17924 | CaOPT2.3F  | TRANSPORT FACILITATION                                |                                                                |
| CA2872 | 0.9 | 1.0 | 1.0 | 1.2 | 1.2 | 1.0 | APG13        | 10088575..probable component of the autoph                | orf19.2848 | 10707 | CaAPG13    | PROTEIN FATE [folding modification destination]       | ""CELLULAR TRANSP                                              |
| CA2873 | 1.0 | 1.1 | 1.1 | 1.0 | 1.0 | 1.0 | AQY1         | complemer similarity to plasma membrane an                | orf19.2849 | 10705 | CaAQY1     | TRANSPORT FACILITATION                                | transporter activity                                           |
| CA2874 | 1.0 | 0.9 | 1.0 | 0.9 | 0.9 | 1.0 | IPF4999      | 10101550..unknown function                                | orf19.5843 | 4999  | IPF4999    | No significant S.c. match                             |                                                                |
| CA2875 | 1.0 | 0.9 | 1.0 | 1.0 | 1.0 | 0.9 | MEI5         | 10105914..meiotic protein (by homology)                   | orf19.5844 | 19696 | CaMEI5     | CELL CYCLE AND DNA PROCESSING                         | molecular_function unknown                                     |
| CA2876 | 1.0 | 1.0 | 1.0 | 0.9 | 1.0 | 0.9 | RNR2         | 10106787..Ribonucleotide reductase (by hom                | orf19.5845 | 3774  | CaRNR2     | Nucleotide metabolism                                 | CELL CYCLE AND DNA PROCESSING                                  |
| CA2877 | 1.1 | 1.0 | 0.9 | 1.0 | 1.0 | 0.9 | TFB2         | complemer Transcription/repair factor (by hom             | orf19.5846 | 3776  | CaTFB2     | CELL CYCLE AND DNA PROCESSING                         | TRANSCRIPTION SUBCELLU                                         |
| CA2878 | 1.0 | 1.0 | 0.9 | 1.0 | 1.0 | 1.0 | RET1         | 10111192..DNA-directed RNA polymerase III                 | orf19.5847 | 3777  | CaRET1     | TRANSCRIPTION SUBCELLULAR LOCALISATION                | nucleotidyltransferase activity                                |
| CA2879 | 1.1 | 0.9 | 0.9 | 0.7 | 0.9 | 1.0 | IPF3779      | 10115248..unknown function                                | orf19.5848 | 3779  | IPF3779    | UNCLASSIFIED PROTEINS                                 |                                                                |
| CA2880 | 1.0 | 1.0 | 1.0 | 1.0 | 1.0 | 1.0 | IPF3781      | 10117617..unknown function                                | orf19.5849 | 3781  | IPF3781    | TRANSCRIPTION SUBCELLULAR LOCALISATION                | DNA binding,transcription regulato                             |
| CA2881 | 1.1 | 1.0 | 1.0 | 1.0 | 1.0 | 1.0 | RAD4         | complemer Excision repair protein (by homolo              | orf19.5850 | 3784  | CaRAD4     | CELLULAR TRANSPORT AND TRANSPORT MECHANISMS CONTRO    | molecular_function unknown                                     |
| CA2882 | 1.0 | 1.0 | 1.0 | 1.0 | 0.9 | 1.0 | STE13        | complemer type IV dipeptidyl aminopeptidase               | orf19.5851 | 3786  | CaSTE13    | PROTEIN FATE [folding modification destination]       | ""CELL FATE SUBCEL                                             |
| CA2883 | 1.1 | 1.0 | 1.0 | 1.1 | 1.1 | 1.1 | IPF3790      | 10125186..unknown function                                | orf19.5852 | 3790  | IPF3790    | CELLULAR TRANSPORT AND TRANSPORT MECHANISMS           | CELLULAR LOCALISATION                                          |
| CA2884 | 1.1 | 1.1 | 0.9 | 1.0 | 0.9 | 1.1 | IPF7201      | complemer similar to Saccharomyces cerevisi               | orf19.2476 | 7201  | IPF7201    | CONTROL OF CELLULAR ORGANIZATION                      | molecular_function unknown                                     |
| CA2885 | 1.0 | 1.0 | 1.0 | 1.0 | 1.0 | 1.0 | IPF7204      | complemer unknown function                                | orf19.2475 | 7204  | IPF7204    | No significant S.c. match                             |                                                                |
| CA2886 | 1.0 | 1.0 | 1.0 | 1.1 | 1.0 | 0.9 | IPF7207      | 10141237..unknown function                                | orf19.2473 | 7207  | IPF7207    | UNCLASSIFIED PROTEINS                                 | DNA binding                                                    |
| CA2887 | 1.0 | 1.0 | 1.0 | 0.9 | 1.0 | 0.9 | IPF13631     | complemer unknown function                                | orf19.2472 | 13631 | IPF13631   | No significant S.c. match                             |                                                                |
| CA2888 | 1.0 | 1.0 | 0.9 | 0.9 | 1.0 | 1.0 | GIM5         | 10144589..Gim complex component (by hom                   | orf19.2471 | 13630 | CaGIM5     | PROTEIN FATE [folding modification destination]       | ""CONTROL OF CELL                                              |
| CA2889 | 0.9 | 0.9 | 1.0 | 1.0 | 1.1 | 1.0 | IPF13628     | complemer putative DNA repair protein (by ho              | orf19.2469 | 13628 | IPF13628   | CELL CYCLE AND DNA PROCESSING                         | SUBCELLULAR LOCALISATIO                                        |
| CA2890 | 0.9 | 1.0 | 1.0 | 1.0 | 0.9 | 0.9 | IPF13626     | 10146672..Putative methyltransferase (by hor              | orf19.2468 | 13626 | IPF13626   | UNCLASSIFIED PROTEINS                                 | transferase activity                                           |
| CA2891 | 1.0 | 1.0 | 1.0 | 1.0 | 1.0 | 1.0 | IFS4         | 10148151..Pirin protein (by homology)                     | orf19.2467 | 6686  | CaIFS4     | No significant S.c. match                             |                                                                |
| CA2892 | 1.0 | 1.0 | 1.0 | 1.0 | 1.1 | 1.0 | IPF6688      | 10149496..unknown function                                | orf19.2465 | 6688  | IPF6688    | No significant S.c. match                             |                                                                |
| CA2893 | 1.0 | 0.9 | 0.9 | 1.0 | 1.0 | 0.9 | IFS3         | 10151006..Unknown function                                | orf19.2463 | 6690  | CaIFS3     | UNCLASSIFIED PROTEINS                                 |                                                                |
| CA2894 | 1.0 | 1.0 | 1.0 | 1.0 | 1.0 | 1.1 | IFS2         | 10152524..Unknown function                                | orf19.2462 | 6691  | CaIFS2     | No significant S.c. match                             |                                                                |
| CA2895 | 1.0 | 1.0 | 1.0 | 1.0 | 1.1 | 1.0 | IFS1         | 10154280..Unknown function                                | orf19.2461 | 6694  | CaIFS1     | UNCLASSIFIED PROTEINS                                 |                                                                |
| CA2896 | 0.9 | 0.9 | 1.1 | 1.0 | 1.0 | 1.0 | IPF14981     | complemer unknown function                                | orf19.3483 | 14981 | IPF14981   | UNCLASSIFIED PROTEINS                                 | molecular_function unknown                                     |
| CA2897 | 1.0 | 1.1 | 1.1 | 1.0 | 1.1 | 1.0 | IPF14979     | complemer similar to Saccharomyces cerevisi               | orf19.3482 | 14979 | IPF14979   | Nucleotide metabolism                                 | hydrolase activity                                             |
| CA2898 | 1.0 | 0.9 | 0.9 | 0.9 | 1.1 | 1.0 | IPF15646     | complemer putative ATP-dependent RNA heli                 | orf19.3481 | 15646 | IPF15646   | UNCLASSIFIED PROTEINS                                 | RNA binding,helicase activity                                  |
| CA2899 | 1.0 | 1.0 | 1.0 | 1.0 | 0.9 | 1.0 | IPF17681     | 10164782..similar to Saccharomyces cerevisi               | orf19.3480 | 17681 | IPF17681   | CLASSIFICATION NOT YET CLEAR-CUT                      | structural molecule activity                                   |
| CA2900 | 1.0 | 1.0 | 1.1 | 1.0 | 1.0 | 0.9 | NIP7         | complemer required for efficient 60S ribosome             | orf19.3478 | 11733 | CaNIP7     | TRANSCRIPTION SUBCELLULAR LOCALISATION                | molecular_function unknown                                     |
| CA2901 | 1.0 | 0.9 | 1.0 | 1.0 | 1.1 | 1.0 | PUS1         | 10167784..pseudouridine synthase 1 (by hom                | orf19.3477 | 11730 | CaPUS1     | Nucleotide metabolism                                 | TRANSCRIPTION SUBCELLULAR LOCALISAT                            |

|        |     |     |     |     |     |     |              |                                                         |            |       |              |                                                                                                          |                                           |
|--------|-----|-----|-----|-----|-----|-----|--------------|---------------------------------------------------------|------------|-------|--------------|----------------------------------------------------------------------------------------------------------|-------------------------------------------|
| CA2902 | 1.0 | 1.0 | 1.0 | 1.0 | 1.1 | 0.9 | HRR25        | complemer casein kinase I (by homology)                 | orf19.3476 | 11729 | CaHRR25      | CELL CYCLE AND DNA PROCESSING SUBCELLULAR LOCALISATION                                                   | protein kinase activity                   |
| CA2903 | 0.8 | 0.8 | 0.7 | 0.5 | 0.6 | 0.7 | IPF11725     | complemer unknown function                              | orf19.1097 | 11725 | IPF11725     | No significant S.c. match                                                                                |                                           |
| CA2904 | 1.0 | 1.1 | 1.1 | 1.1 | 1.0 | 1.0 | IPL1         | 10177676..Ser/thr protein kinase (by homology)          | orf19.3474 | 12051 | CaPL1        | CELL CYCLE AND DNA PROCESSING                                                                            | protein kinase activity                   |
| CA2905 | 0.9 | 0.9 | 1.1 | 1.0 | 1.1 | 1.0 | IPF12049     | complemer unknown function                              | orf19.1097 | 12049 | IPF12049     | UNCLASSIFIED PROTEINS                                                                                    | molecular_function unknown                |
| CA2906 | 1.0 | 1.0 | 1.0 | 1.0 | 1.0 | 1.0 | IPF15523     | complemer unknown function                              | orf19.4521 | 15523 | IPF15523     | CLASSIFICATION NOT YET CLEAR-CUT                                                                         | oxidoreductase activity                   |
| CA2907 | 0.9 | 1.0 | 1.0 | 1.0 | 1.0 | 1.0 | IPF15525     | complemer putative gluconokinase (by homology)          | orf19.4520 | 15525 | IPF15525     | C-compound and carbohydrate metabolism                                                                   | molecular_function unknown                |
| CA2908 | 1.0 | 0.9 | 1.0 | 1.0 | 0.9 | 1.1 | SUV3         | complemer ATP-dependent RNA helicase, mitochondrial     | orf19.4519 | 15527 | CaSUV3       | Nucleotide metabolism TRANSCRIPTION PROTEIN SYNTHESIS SUBCELLULAR LOCALISATION                           | RNA binding,helicase activity             |
| CA2909 | 1.1 | 1.0 | 0.9 | 1.1 | 1.0 | 0.9 | IPF11424     | 10190600..unknown function                              | orf19.4518 | 11424 | IPF11424     | UNCLASSIFIED PROTEINS                                                                                    | protein kinase activity                   |
| CA2910 | 0.9 | 1.1 | 1.0 | 1.0 | 1.1 | 1.0 | IPF11421     | 10193868..unknown function                              | orf19.4517 | 11421 | IPF11421     | No significant S.c. match                                                                                |                                           |
| CA2911 | 1.0 | 0.9 | 1.0 | 1.0 | 1.0 | 1.1 | MET7         | complemer folylpolyglutamate synthetase                 | orf19.4516 | 11419 | CaMET7       | Metabolism of vitamins cofactors and prosthetic groups                                                   | ligase activity                           |
| CA2912 | 0.9 | 0.9 | 0.9 | 0.9 | 0.9 | 0.9 | IPF11206     | 10197825..unknown function                              | orf19.4515 | 11206 | IPF11206     | CELL RESCUE DEFENSE AND VIRULENCE TRANSCRIPTION FACILITATION                                             |                                           |
| CA2913 | 1.1 | 1.0 | 1.0 | 1.0 | 0.9 | 1.0 | IPF11205     | 10199936..unknown function                              | orf19.4513 | 11205 | IPF11205     | Lipid fatty-acid and isoprenoid metabolism TRANSCRIPTION FACILITATION                                    |                                           |
| CA2914 | 1.0 | 0.9 | 1.0 | 1.1 | 1.1 | 1.0 | IFA17.5F     | 10201694..unknown function, 5-prime end                 | orf19.4512 | 11203 | CaIFA17.5F   | No significant S.c. match                                                                                |                                           |
| CA2915 | 1.1 | 1.0 | 1.0 | 1.1 | 1.0 | 1.0 | IFA17.3F     | 10202423..unknown function, 3-prime end                 | orf19.4511 | 11201 | CaIFA17.3F   | Nucleotide metabolism CELL CYCLE AND DNA PROCESSING CELLULAR COMMUNICATION/SIGNAL TRANSDUCTION           |                                           |
| CA2916 | 0.9 | 1.0 | 0.9 | 1.1 | 1.1 | 1.0 | IFA4         | 10204695..unknown function                              | orf19.4510 | 11199 | CaIFA4       | Nucleotide metabolism CELL CYCLE AND DNA PROCESSING CELLULAR COMMUNICATION/SIGNAL TRANSDUCTION           |                                           |
| CA2917 | 1.1 | 1.0 | 1.0 | 1.0 | 1.0 | 1.0 | IPF16173.5F  | 10207753..Unknown function, 5-prime end                 | orf19.4509 | 16177 | IPF16173.5F  | No significant S.c. match                                                                                |                                           |
| CA2918 | 1.0 | 1.0 | 1.0 | 1.1 | 0.9 | 0.9 | IPF16173.3F  | 10208060..unknown function, 3-prime end                 | orf19.4508 | 16174 | IPF16173.3F  | No significant S.c. match                                                                                |                                           |
| CA2919 | 1.0 | 1.0 | 1.0 | 1.0 | 1.1 | 1.0 | IFA18.3      | 10208768..unknown function, 3-prime end                 | orf19.4507 | 16173 | CaIFA18.3    | Nucleotide metabolism CELL CYCLE AND DNA PROCESSING CELLULAR COMMUNICATION/SIGNAL TRANSDUCTION           |                                           |
| CA2920 | 1.1 | 0.4 | 1.4 | 2.1 | 1.5 | 1.6 | FET5         | complemer multicopy oxidase (by homology)               | orf19.4215 | 17039 | CaFET5       | CELLULAR TRANSPORT AND TRANSPORT MECHANISMS REGULATION OF/INTERACTION WITH CELL CYCLE AND DNA PROCESSING |                                           |
| CA2921 | 1.0 | 1.0 | 1.0 | 1.0 | 1.0 | 1.0 | IPF17037     | complemer unknown function                              | orf19.4214 | 17037 | IPF17037     | ENERGY                                                                                                   |                                           |
| CA2922 | 0.9 | 0.9 | 1.1 | 1.1 | 1.0 | 1.1 | FET31        | complemer cell surface ferroxidase multicopy            | orf19.1168 | 17035 | CaFET31      | CELLULAR TRANSPORT AND TRANSPORT MECHANISMS REGULATION OF/INTERACTION WITH CELL CYCLE AND DNA PROCESSING |                                           |
| CA2923 | 0.9 | 1.0 | 1.1 | 1.1 | 1.1 | 1.2 | FET32        | complemer cell surface ferroxidase (by homology)        | orf19.1168 | 11905 | CaFET32      | CELLULAR TRANSPORT AND TRANSPORT MECHANISMS REGULATION OF/INTERACTION WITH CELL CYCLE AND DNA PROCESSING |                                           |
| CA2924 | 0.9 | 0.9 | 1.0 | 1.1 | 1.0 | 1.1 | FET33        | complemer cell surface ferroxidase (by homology)        | orf19.1168 | 11908 | CaFET33      | CELLULAR TRANSPORT AND TRANSPORT MECHANISMS REGULATION OF/INTERACTION WITH CELL CYCLE AND DNA PROCESSING | oxidoreductase activity                   |
| CA2925 | 1.0 | 1.0 | 1.0 | 1.0 | 1.1 | 0.9 | IPF7827      | 10229638..unknown function                              | orf19.4210 | 7827  | IPF7827      | UNCLASSIFIED PROTEINS                                                                                    | molecular_function unknown                |
| CA2926 | 1.0 | 1.0 | 0.9 | 1.0 | 1.0 | 1.0 | UBA3         | complemer Ubiquitin-like protein activating enzyme      | orf19.4209 | 7830  | CaUBA3       | PROTEIN FATE [folding modification destination]                                                          |                                           |
| CA2927 | 1.0 | 0.9 | 1.0 | 1.1 | 1.1 | 1.0 | RAD52        | complemer Nuclear ribonucleoprotein E                   | orf19.4208 | 7833  | CaRAD52      | CELL CYCLE AND DNA PROCESSING CELL FATE SUBCELLULAR LOCALISATION                                         | DNA binding                               |
| CA2928 | 1.1 | 1.0 | 1.0 | 1.1 | 1.1 | 0.9 | SME1         | complemer Nuclear ribonucleoprotein E                   | orf19.4208 | 7835  | CaSME1       | TRANSCRIPTION SUBCELLULAR LOCALISATION                                                                   | RNA binding                               |
| CA2929 | 0.9 | 0.9 | 1.0 | 0.9 | 1.0 | 1.0 | IPF7838      | 10235491..similar to Saccharomyces cerevisiae           | orf19.4206 | 7838  | IPF7838      | CELL CYCLE AND DNA PROCESSING                                                                            | hydrolase activity                        |
| CA2930 | 1.1 | 1.0 | 1.0 | 1.0 | 1.0 | 0.9 | IPF7840      | 10237526..similar to Saccharomyces cerevisiae           | orf19.4204 | 7840  | IPF7840      | PROTEIN SYNTHESIS SUBCELLULAR LOCALISATION                                                               | structural molecule activity              |
| CA2931 | 1.1 | 1.0 | 0.9 | 1.0 | 1.0 | 1.0 | IPF7841      | 10238778..similar to Saccharomyces cerevisiae           | orf19.4203 | 7841  | IPF7841      | CELL CYCLE AND DNA PROCESSING SUBCELLULAR LOCALISATION                                                   | structural molecule activity              |
| CA2932 | 1.1 | 1.1 | 1.0 | 1.0 | 1.0 | 1.0 | NHX1         | complemer NA+-H+ antiporter                             | orf19.1167 | 7842  | CaNHX1       | CELLULAR TRANSPORT AND TRANSPORT MECHANISMS REGULATION OF/INTERACTION WITH CELL CYCLE AND DNA PROCESSING | transporter activity                      |
| CA2934 | 1.0 | 0.9 | 1.0 | 1.0 | 1.1 | 1.0 | IPF11515     | 10249547..similar to Saccharomyces cerevisiae           | orf19.3329 | 11515 | IPF11515     | Lipid fatty-acid and isoprenoid metabolism TRANSCRIPTION FACILITATION                                    | hydrolase activity                        |
| CA2935 | 1.0 | 1.0 | 1.0 | 1.0 | 1.0 | 1.0 | IPF11521     | 10254612..unknown function                              | orf19.3328 | 11521 | IPF11521     | UNCLASSIFIED PROTEINS                                                                                    | transcription regulator activity          |
| CA2936 | 1.0 | 1.0 | 0.9 | 1.0 | 1.0 | 1.0 | IPF8326      | 10256835..similar to Saccharomyces cerevisiae           | orf19.3327 | 8326  | IPF8326      | TRANSCRIPTION SUBCELLULAR LOCALISATION                                                                   | transferase activity                      |
| CA2937 | 1.0 | 1.0 | 0.9 | 0.8 | 1.0 | 1.1 | RPS21B.3     | 10259199..ribosomal protein S21, ribosomal protein S21  | orf19.3326 | 8325  | CaRPS21B.3   | PROTEIN SYNTHESIS SUBCELLULAR LOCALISATION                                                               | structural molecule activity              |
| CA2938 | 0.9 | 0.9 | 1.1 | 1.4 | 1.3 | 1.3 | IPF8321      | 10261346..similar to Saccharomyces cerevisiae           | orf19.3325 | 8321  | IPF8321      | C-compound and carbohydrate metabolism ENERGY                                                            | transferase activity                      |
| CA2939 | 1.1 | 1.1 | 0.9 | 0.9 | 0.9 | 1.0 | TIF1         | 10264139..translation initiation factor                 | orf19.3324 | 8319  | CaTIF1       | PROTEIN SYNTHESIS SUBCELLULAR LOCALISATION                                                               | translation regulator activity            |
| CA2940 | 0.9 | 1.0 | 0.9 | 1.0 | 1.0 | 0.9 | IPF8318      | 10265728..unknown function                              | orf19.3323 | 8318  | IPF8318      | SUBCELLULAR LOCALISATION                                                                                 |                                           |
| CA2941 | 1.0 | 1.0 | 1.0 | 1.0 | 1.0 | 1.0 | CVB1         | complemer vacuole biogenesis core                       | orf19.1970 | 6289  | CaCVB1       | No significant S.c. match                                                                                |                                           |
| CA2942 | 1.0 | 1.0 | 0.9 | 0.9 | 1.0 | 1.0 | IPF6291      | 10270806..Secretory Stress Response protein             | orf19.1969 | 6291  | IPF6291      | No significant S.c. match                                                                                |                                           |
| CA2943 | 1.0 | 1.0 | 1.0 | 1.0 | 1.0 | 1.0 | MAK31        | complemer Involved in stability of L-A dsRNA-containing | orf19.1968 | 6293  | CaMAK31      | No significant S.c. match                                                                                | transferase activity                      |
| CA2944 | 0.9 | 1.0 | 1.1 | 1.2 | 1.0 | 1.0 | IPF6294      | 10272504..unknown function                              | orf19.1968 | 6294  | IPF6294      | No significant S.c. match                                                                                |                                           |
| CA2945 | 1.0 | 1.0 | 1.0 | 1.0 | 1.0 | 1.0 | IMG1         | complemer Ribosomal protein, mitochondrial              | orf19.1967 | 6295  | CaIMG1       | ENERGY PROTEIN SYNTHESIS SUBCELLULAR LOCALISATION                                                        | structural molecule activity              |
| CA2946 | 1.0 | 1.1 | 1.1 | 1.0 | 1.0 | 1.0 | IPF6296      | complemer putative methyltransferase (by homology)      | orf19.1966 | 6296  | IPF6296      | CLASSIFICATION NOT YET CLEAR-CUT                                                                         | transferase activity                      |
| CA2947 | 1.1 | 1.1 | 1.0 | 1.1 | 1.0 | 0.9 | IPF6298      | complemer unknown function                              | orf19.1964 | 6298  | IPF6298      | No significant S.c. match                                                                                |                                           |
| CA2948 | 1.1 | 1.0 | 1.0 | 0.9 | 0.9 | 1.1 | GDS1         | complemer nam9-1 suppressor (by homology)               | orf19.1963 | 6301  | CaGDS1       | CLASSIFICATION NOT YET CLEAR-CUT                                                                         | molecular_function unknown                |
| CA2949 | 1.0 | 1.0 | 1.1 | 1.0 | 0.9 | 1.0 | IPF14506     | complemer unknown function                              | orf19.9516 | 14506 | IPF14506     | No significant S.c. match                                                                                |                                           |
| CA2950 | 1.0 | 1.0 | 1.1 | 1.1 | 1.1 | 1.1 | CLN2         | complemer G1/S-SPECIFIC CYCLIN G1 cyclin [orf19.9515]   | orf19.9515 | 10874 | CaCLN2       | CELL CYCLE AND DNA PROCESSING TRANSCRIPTION FACILITATION                                                 | protein kinase activity,enzyme regulation |
| CA2951 | 1.0 | 0.9 | 1.1 | 1.2 | 1.1 | 1.2 | SBP1         | 10299689..RNA binding protein-like (by homology)        | orf19.5854 | 10692 | CaSBP1       | TRANSCRIPTION SUBCELLULAR LOCALISATION                                                                   | RNA binding                               |
| CA2952 | 0.9 | 0.9 | 1.0 | 1.0 | 0.9 | 1.0 | IPF19671     | 10301502..unknown function                              | orf19.5855 | 19671 | IPF19671     | Lipid fatty-acid and isoprenoid metabolism TRANSCRIPTION FACILITATION                                    |                                           |
| CA2953 | 1.0 | 1.0 | 1.0 | 1.1 | 1.1 | 1.0 | MBP1         | complemer transcription factor (by homology)            | orf19.5855 | 10688 | CaMBP1       | CELL CYCLE AND DNA PROCESSING TRANSCRIPTION SUBCELLULAR LOCALISATION                                     | DNA binding                               |
| CA2954 | 1.0 | 1.0 | 1.0 | 1.0 | 0.9 | 1.1 | IPF10685     | complemer unknown function                              | orf19.5856 | 10685 | IPF10685     | SUBCELLULAR LOCALISATION                                                                                 |                                           |
| CA2955 | 1.0 | 0.9 | 1.1 | 0.9 | 1.0 | 1.0 | IPF15201     | 10306785..Unknown function                              | orf19.5857 | 15201 | IPF15201     | No significant S.c. match                                                                                |                                           |
| CA2956 | 1.1 | 1.1 | 0.8 | 0.9 | 1.0 | 1.1 | EGD2         | complemer Nascent polypeptide associated core           | orf19.5858 | 15200 | CaEGD2       | C-compound and carbohydrate metabolism TRANSCRIPTION SUBCELLULAR LOCALISATION                            | chaperone activity                        |
| CA2957 | 1.1 | 1.0 | 1.0 | 1.1 | 1.0 | 1.0 | DAL53        | 10309893..allantoate permease (by homology)             | orf19.5859 | 8598  | CaDAL53      | CELLULAR TRANSPORT AND TRANSPORT MECHANISMS SUBCELLULAR LOCALISATION TRANSPORT FACILITATION              |                                           |
| CA2958 | 1.1 | 1.0 | 1.0 | 1.0 | 1.1 | 1.1 | KRE9         | 10313399..cell wall synthesis protein                   | orf19.5861 | 8595  | CaKRE9       | C-compound and carbohydrate metabolism CELL FATE SUBCELLULAR LOCALISATION                                | molecular_function unknown                |
| CA2959 | 1.0 | 1.0 | 1.1 | 1.0 | 0.9 | 1.0 | IPF8591      | 10315498..putative arginase family member               | orf19.5862 | 8591  | IPF8591      | Amino acid metabolism Nitrogen and sulphur metabolism SUBCELLULAR LOCALISATION                           |                                           |
| CA2960 | 1.1 | 1.0 | 0.9 | 1.0 | 0.9 | 1.0 | IPF8590      | 10317643..unknown function                              | orf19.5863 | 8590  | IPF8590      | No significant S.c. match                                                                                |                                           |
| CA2961 | 1.1 | 1.0 | 0.9 | 1.0 | 1.0 | 0.9 | URK1         | complemer uridine kinase (by homology)                  | orf19.5864 | 8589  | CaURK1       | Nucleotide metabolism                                                                                    | transferase activity                      |
| CA2962 | 0.9 | 1.0 | 1.0 | 0.9 | 1.0 | 1.0 | PRP2         | 10320357..RNA-dependent ATPase (by homology)            | orf19.5865 | 8587  | CaPRP2       | TRANSCRIPTION SUBCELLULAR LOCALISATION                                                                   | RNA binding,helicase activity             |
| CA2963 | 1.0 | 1.0 | 1.0 | 1.0 | 1.0 | 1.0 | GRP3         | complemer dihydroflavonol-4-reductases (by homology)    | orf19.5611 | 13178 | CaGRP3       | Metabolism of vitamins cofactors and prosthetic groups                                                   | oxidoreductase activity                   |
| CA2964 | 1.0 | 1.0 | 0.9 | 1.1 | 1.0 | 1.0 | IPF13176.3   | complemer ornithine carbamoyltransferase, 3-oxo         | orf19.5610 | 13176 | IPF13176.3   | Amino acid metabolism SUBCELLULAR LOCALISATION                                                           | transferase activity                      |
| CA2965 | 1.0 | 1.1 | 1.0 | 1.0 | 0.9 | 0.9 | IPF13174     | complemer unknown function                              | orf19.5609 | 13174 | IPF13174     | No significant S.c. match                                                                                |                                           |
| CA2966 | 0.9 | 0.9 | 1.1 | 1.0 | 0.9 | 0.9 | RPC34        | 10334066..DNA-directed RNA polymerase III               | orf19.5608 | 16279 | CaRPC34      | TRANSCRIPTION CONTROL OF CELLULAR ORGANIZATION SUBCELLULAR LOCALISATION                                  | nucleotidyltransferase activity           |
| CA2967 | 1.1 | 1.0 | 1.0 | 1.0 | 1.0 | 1.0 | IPF12513     | 10338043..unknown function                              | orf19.5605 | 12513 | IPF12513     | UNCLASSIFIED PROTEINS                                                                                    | protein binding                           |
| CA2968 | 0.9 | 1.0 | 1.1 | 1.0 | 1.0 | 1.0 | BMR1         | 10342240..benomyl/methothrexate resistance              | orf19.5604 | 16346 | CaBMR1       | CELL RESCUE DEFENSE AND VIRULENCE TRANSCRIPTION FACILITATION                                             | transporter activity                      |
| CA2969 | 1.0 | 1.0 | 1.1 | 1.0 | 1.0 | 1.0 | IPF19772     | 10345160..unknown function                              | orf19.5602 | 19772 | IPF19772     | No significant S.c. match                                                                                |                                           |
| CA2970 | 1.1 | 1.0 | 1.0 | 1.0 | 1.0 | 0.9 | IPF14448     | 10347311..unknown function                              | orf19.5601 | 14448 | IPF14448     | No significant S.c. match                                                                                |                                           |
| CA2971 | 1.0 | 1.0 | 1.0 | 1.0 | 1.0 | 1.0 | MDL2.5F      | 10348887..ATP-binding transporter, 5-prime end          | orf19.5600 | 14449 | CaMDL2.5F    | TRANSPORT FACILITATION                                                                                   |                                           |
| CA2972 | 1.0 | 1.0 | 1.1 | 1.0 | 1.0 | 1.0 | MDL2.3F      | 10350636..ATP-binding transporter, 3-prime end          | orf19.5599 | 20121 | CaMDL2.3F    | TRANSPORT FACILITATION                                                                                   |                                           |
| CA2973 | 1.1 | 1.0 | 0.9 | 0.8 | 0.9 | 1.1 | IPF14452.REF | complemer F1-ATPase epsilon subunit (by homology)       | orf19.8824 | 14452 | IPF14452.REF | No significant S.c. match                                                                                |                                           |
| CA2974 | 1.0 | 1.0 | 1.0 | 1.0 | 1.0 | 1.0 | IPF12540     | 10359969..unknown function                              | orf19.8824 | 12540 | IPF12540     | No significant S.c. match                                                                                |                                           |

|        |     |     |     |     |     |     |              |                                                        |             |       |            |                                                                                              |                                       |
|--------|-----|-----|-----|-----|-----|-----|--------------|--------------------------------------------------------|-------------|-------|------------|----------------------------------------------------------------------------------------------|---------------------------------------|
| CA2975 | 0.9 | 0.9 | 1.0 | 0.9 | 0.9 | 1.1 | ARO9         | 10363904..aromatic amino acid aminotransferor          | orf19.8822  | 14677 | CaARO9     | Amino acid metabolism                                                                        | transferase activity                  |
| CA2976 | 1.0 | 0.9 | 1.0 | 1.1 | 1.0 | 1.1 | IPF14676     | 10365923..unknown function                             | orf19.8821  | 14676 | IPF14676   | UNCLASSIFIED PROTEINS                                                                        | molecular_function unknown            |
| CA2977 | 0.9 | 1.0 | 1.0 | 0.9 | 1.0 | 0.9 | HOM3         | complemer Aspartokinase (by homology)                  | orf19.1235  | 14675 | CaHOM3     | Amino acid metabolism                                                                        | transferase activity                  |
| CA2979 | 1.0 | 0.9 | 1.0 | 1.0 | 1.0 | 1.1 | ADE4         | complemer amidophosphoribosyltransferase (             | orf19.1233  | 13283 | CaADE4     | Nucleotide metabolism Purine ribonucleotide metabolism                                       | transferase activity                  |
| CA2980 | 0.9 | 0.9 | 1.0 | 1.0 | 0.9 | 1.0 | GOG5         | 10390348..GDP-mannose transporter (by hor              | orf19.1232  | 13284 | CaGOG5     | CELLULAR TRANSPORT AND TRANSPORT MECHANISMS                                                  | transporter activity                  |
| CA2981 | 1.0 | 0.9 | 1.0 | 0.9 | 1.0 | 1.1 | CSE1.5F      | 10392640..Importin-beta-like protein, 5-prime          | orf19.1231  | 13285 | CaCSE1.5f  | PROTEIN FATE [folding modification destination] ""CELLULAR TRANSP                            | protein binding                       |
| CA2982 | 0.9 | 1.0 | 1.0 | 1.0 | 0.9 | 1.0 | CSE1.3F      | 10394151..Importin-beta-like protein, 3-prime          | orf19.8815  | 16520 | CaCSE1.3f  | PROTEIN FATE [folding modification destination] ""CELLULAR TRANSPORT AND TRANSPORT MECHAN    |                                       |
| CA2983 | 1.0 | 1.0 | 1.1 | 1.1 | 1.0 | 1.0 | IPF18396     | complemer unknown function                             | orf19.8814  | 18396 | IPF18396   | No significant S.c. match                                                                    |                                       |
| CA2984 | 0.9 | 0.9 | 1.1 | 1.1 | 1.1 | 1.1 | IPF12606.3EC | 10397204..unknown function, 3-prime end                |             | 5109  | IPF12606.3 | UNCLASSIFIED PROTEINS                                                                        |                                       |
| CA2985 | 1.0 | 1.0 | 1.0 | 0.9 | 1.1 | 1.0 | SET1         | 10399009..Chromatin regulatory protein (by h           | orf19.6009  | 5105  | CaSET1     | CELL CYCLE AND DNA PROCESSING CELL FATE CONTROL OF CEI                                       | transferase activity                  |
| CA2986 | 0.9 | 0.9 | 1.0 | 0.9 | 1.0 | 1.0 | CDC5         | 10403402..Cell-cycle protein kinase (by hom            | orf19.6010  | 5102  | CaCDC5     | CELL CYCLE AND DNA PROCESSING SUBCELLULAR LOCALISATIO                                        | protein kinase activity               |
| CA2987 | 1.0 | 1.0 | 1.0 | 1.0 | 1.1 | 0.9 | RPB11.3      | complemer DNA-directed RNA polymerase II subunit, 3-pr |             | 5100  | CaRPB11.1  | TRANSCRIPTION SUBCELLULAR LOCALISATION                                                       | nucleotidyltransferase activity       |
| CA2988 | 1.0 | 1.0 | 1.0 | 1.0 | 1.0 | 0.9 | SIN3.EXON2   | 10407146..Histone deacetylase by homology              |             | 5097  | CaSIN3.ex  | Lipid fatty-acid and isoprenoid metabolism ""TRANSCRIPTION CELL FATE SUBCELLULAR LOCALISATIO |                                       |
| CA2989 | 1.0 | 1.0 | 0.9 | 1.0 | 1.0 | 1.1 | SIN3.EXON3   | 10407748..Histone deacetylase by homology              | orf19.6011  | 5096  | CaSIN3.ex  | Lipid fatty-acid and isoprenoid metabolism ""TRANSCRIPTION CELL FA                           | hydrolase activity                    |
| CA2990 | 1.0 | 1.0 | 1.0 | 1.1 | 1.1 | 1.1 | IPF5092      | complemer unknown function                             | orf19.6012  | 5092  | IPF5092    | UNCLASSIFIED PROTEINS                                                                        | molecular_function unknown            |
| CA2991 | 1.0 | 1.0 | 1.0 | 1.0 | 1.0 | 1.0 | IPF5088.3    | complemer unknown function, 3-prime end                | orf19.6013  | 5088  | IPF5088.3  | UNCLASSIFIED PROTEINS                                                                        | molecular_function unknown            |
| CA2992 | 0.9 | 1.0 | 0.9 | 1.0 | 0.9 | 1.0 | RRS1         | complemer Regulator for ribosome synthesis             | (orf19.6014 | 5085  | CaRRS1     | TRANSCRIPTION                                                                                | molecular_function unknown            |
| CA2993 | 1.0 | 1.0 | 1.1 | 1.1 | 1.1 | 1.0 | IPF9118      | complemer unknown function                             | orf19.6118  | 9118  | IPF9118    | CELLULAR TRANSPORT AND TRANSPORT MECHANISMS                                                  | enzyme regulator activity             |
| CA2994 | 1.1 | 1.0 | 1.0 | 1.0 | 1.0 | 1.0 | IPF9116      | 10425599..unknown function                             | orf19.6119  | 9116  | IPF9116    | No significant S.c. match                                                                    |                                       |
| CA2995 | 1.1 | 0.9 | 1.1 | 1.0 | 0.9 | 0.9 | IPF9113      | 10428585..unknown function                             | orf19.6121  | 9113  | IPF9113    | TRANSCRIPTION                                                                                | molecular_function unknown            |
| CA2996 | 1.0 | 1.0 | 1.0 | 1.0 | 1.0 | 1.0 | IPF9108      | complemer similar to Saccharomyces cerevisi            | orf19.6124  | 9108  | IPF9108    | C-compound and carbohydrate metabolism CELL CYCLE AND DNA PR                                 | transcription regulator activity      |
| CA2997 | 1.0 | 1.1 | 1.0 | 1.1 | 1.0 | 1.0 | KGD2         | complemer 2-oxoglutarate dehydrogenase cor             | orf19.6126  | 8851  | CaKGD2     | C-compound and carbohydrate metabolism ENERGY SUBCELLULAR L                                  | molecular_function unknown            |
| CA2998 | 1.0 | 0.9 | 1.0 | 1.0 | 1.0 | 0.9 | LPD1         | 10438250..dihydrolipoamide dehydrogenase               | (orf19.6127 | 8847  | CaLPD1     | Amino acid metabolism ENERGY SUBCELLULAR LOCALISATION                                        | transporter activity                  |
| CA2999 | 1.0 | 1.1 | 1.0 | 0.9 | 1.0 | 0.9 | MRPL8        | 10440104..mitochondrial 60S ribosomal subu             | orf19.6129  | 8844  | CaMRPL8    | PROTEIN SYNTHESIS SUBCELLULAR LOCALISATION                                                   | structural molecule activity          |
| CA3000 | 1.0 | 1.0 | 1.0 | 1.0 | 1.0 | 1.0 | TSC1.5       | 10441073..3-ketosphinganine reductase, 5-pr            | orf19.6131  | 8842  | CaTSC1.5   | Lipid fatty-acid and isoprenoid metabolism                                                   | oxidoreductase activity               |
| CA3001 | 1.0 | 1.1 | 1.0 | 1.0 | 1.0 | 1.1 | IPF8841      | complemer unknown function                             | orf19.6132  | 8841  | IPF8841    | UNCLASSIFIED PROTEINS                                                                        | molecular_function unknown            |
| CA3002 | 1.1 | 1.0 | 0.9 | 0.9 | 1.0 | 1.0 | PIF1         | complemer mitochondrial DNA helicase (by h             | orf19.6133  | 19673 | CaPIF1     | CELL CYCLE AND DNA PROCESSING SUBCELLULAR LOCALISATIO                                        | DNA binding,helicase activity         |
| CA3003 | 1.1 | 1.0 | 1.0 | 1.0 | 1.1 | 1.1 | IPF15741     | 10448869..similar to Saccharomyces cerevisi            | orf19.1362f | 15741 | IPF15741   | UNCLASSIFIED PROTEINS                                                                        | molecular_function unknown            |
| CA3004 | 1.0 | 0.9 | 0.9 | 1.0 | 1.0 | 1.0 | KIN28        | 10452289..cyclin-dependent ser/thr protein ki          | orf19.1361f | 15293 | CaKIN28    | CELL CYCLE AND DNA PROCESSING TRANSCRIPTION SUBCELLUL                                        | protein kinase activity,transcription |
| CA3005 | 0.9 | 0.9 | 1.0 | 1.0 | 1.0 | 1.0 | CC43         | 10456995..Cell Division Control -like (by hom          | orf19.1361f | 19967 | CaCC43     | CELL CYCLE AND DNA PROCESSING CELLULAR COMMUNICATION/SIGNAL                                  | TRANSDUCTION MECH                     |
| CA3006 | 1.0 | 1.0 | 1.0 | 1.0 | 1.0 | 1.0 | IPF12152     | complemer Unknown function                             | orf19.1361f | 12152 | IPF12152   | UNCLASSIFIED PROTEINS                                                                        | molecular_function unknown            |
| CA3007 | 1.0 | 1.0 | 1.0 | 1.0 | 1.0 | 1.0 | IPF12148     | complemer Unknown function                             | orf19.1361f | 12148 | IPF12148   | UNCLASSIFIED PROTEINS                                                                        | molecular_function unknown            |
| CA3008 | 1.0 | 1.0 | 1.0 | 1.1 | 0.9 | 0.9 | IPF12147     | 10461455..unknown function                             | orf19.1361f | 12147 | IPF12147   | UNCLASSIFIED PROTEINS                                                                        | oxidoreductase activity               |
| CA3009 | 1.0 | 1.0 | 1.1 | 1.1 | 1.0 | 1.1 | MRPL19       | complemer Ribosomal protein (by homology)              | orf19.1361f | 14569 | CaMRPL19   | PROTEIN SYNTHESIS SUBCELLULAR LOCALISATION                                                   | structural molecule activity          |
| CA3010 | 1.0 | 1.0 | 1.0 | 1.0 | 1.0 | 1.0 | IPF14568     | 10467495..unknown function                             | orf19.1361f | 14568 | IPF14568   | UNCLASSIFIED PROTEINS                                                                        | enzyme regulator activity             |
| CA3011 | 1.2 | 1.2 | 1.0 | 1.0 | 1.0 | 1.0 | CTA1         | 10470262..catalase A, peroxisomal(by homol             | orf19.6229  | 20124 | CaCTA1     | CELL RESCUE DEFENSE AND VIRULENCE ""SUBCELLULAR LOCAL                                        | oxidoreductase activity               |
| CA3012 | 1.0 | 1.0 | 0.9 | 1.0 | 1.0 | 1.0 | IPF14013     | 10472451..unknown function                             | orf19.6227  | 14013 | IPF14013   | No significant S.c. match                                                                    |                                       |
| CA3013 | 1.0 | 1.0 | 1.0 | 1.1 | 0.9 | 1.0 | PET117       | complemer cytochrome c oxidase assembly factor (by hor |             | 20125 | CaPET117   | PROTEIN FATE [folding modification destination] ""SUBCELLULAR LOC                            | molecular_function unknown            |
| CA3014 | 1.1 | 0.9 | 1.0 | 1.0 | 1.0 | 1.1 | IPF11915     | 10476184..similar to Saccharomyces cerevisi            | orf19.1360f | 11915 | IPF11915   | CLASSIFICATION NOT YET CLEAR-CUT                                                             | protein kinase activity,enzyme regi   |
| CA3015 | 0.9 | 1.1 | 1.1 | 1.0 | 1.0 | 1.1 | IPF10029     | 10480426..unknown function                             | orf19.1139f | 10029 | IPF10029   | UNCLASSIFIED PROTEINS                                                                        | molecular_function unknown            |
| CA3016 | 1.0 | 1.0 | 1.1 | 1.0 | 1.1 | 1.0 | IPF10027     | 10482517..unknown function                             | orf19.1139f | 10027 | IPF10027   | PROTEIN SYNTHESIS CELL FATE SUBCELLULAR LOCALISATION                                         |                                       |
| CA3017 | 1.1 | 1.0 | 1.0 | 1.1 | 1.1 | 1.0 | IPF10021     | 10486002..unknown function                             | orf19.1139f | 10021 | IPF10021   | Nitrogen and sulphur metabolism TRANSCRIPTION SUBCELLULAR LC                                 | DNA binding,transcription regulato    |
| CA3018 | 1.0 | 1.0 | 1.1 | 1.0 | 1.0 | 1.1 | SAH1         | 10488537..S-adenosyl-L-homocysteine hydro              | orf19.3911  | 10018 | CaSAH1     | Metabolism of vitamins cofactors and prosthetic groups                                       | hydrolase activity                    |
| CA3019 | 0.9 | 1.0 | 1.0 | 1.0 | 1.0 | 1.0 | IPF15494     | complemer putative ribonuclease (by homolog            | orf19.3910  | 15494 | IPF15494   | Nucleotide metabolism                                                                        |                                       |
| CA3020 | 0.9 | 1.0 | 1.0 | 0.9 | 0.9 | 1.0 | IPF15492     | complemer unknown function                             | orf19.3908  | 15492 | IPF15492   | CELL RESCUE DEFENSE AND VIRULENCE ""SUBCELLULAR LOCALISATION                                 | TRANSPORT FACILITAT                   |
| CA3021 | 1.0 | 1.1 | 1.0 | 1.1 | 0.9 | 1.0 | IPF17640     | complemer unknown function                             | orf19.3906  | 17640 | IPF17640   | No significant S.c. match                                                                    |                                       |
| CA3022 |     |     |     |     |     |     | IPF17642     | complement(10495936..10496577)                         |             |       |            |                                                                                              |                                       |
| CA3023 | 1.0 | 1.0 | 0.9 | 1.0 | 1.0 | 1.0 | IPF11508     | 10497887..unknown function                             | orf19.3904  | 11508 | IPF11508   | CELL RESCUE DEFENSE AND VIRULENCE                                                            |                                       |
| CA3024 | 1.2 | 1.0 | 1.0 | 1.1 | 1.0 | 1.0 | IPF11506     | complemer unknown function                             | orf19.3903  | 11506 | IPF11506   | Lipid fatty-acid and isoprenoid metabolism ""SUBCELLULAR LOCALISATION                        |                                       |
| CA3025 | 1.0 | 1.0 | 1.0 | 0.9 | 1.0 | 1.0 | IPF11503     | complemer unknown function                             | orf19.3902  | 11503 | IPF11503   | CELLULAR TRANSPORT AND TRANSPORT MECHANISMS                                                  |                                       |
| CA3026 | 1.0 | 1.0 | 1.0 | 1.0 | 1.0 | 1.0 | IPF11499.REF | complemer unknown function                             | orf19.1138f | 11499 | IPF11499.r | No significant S.c. match                                                                    |                                       |
| CA3027 | 1.1 | 1.1 | 1.1 | 1.0 | 1.0 | 1.2 | IPF20126     | complemer putative chromosome segregation              | orf19.1138  | 20126 | IPF20126   | UNCLASSIFIED PROTEINS                                                                        | transporter activity                  |
| CA3028 | 1.0 | 1.0 | 1.0 | 1.0 | 1.0 | 1.0 | IPF18393     | complemer unknown function                             | orf19.1138f | 18393 | IPF18393   | UNCLASSIFIED PROTEINS                                                                        |                                       |
| CA3029 | 1.0 | 1.1 | 1.0 | 1.0 | 1.0 | 0.9 | IPF13825     | 10509253..similarity to serine/threonine protei        | orf19.223   | 13825 | IPF13825   | CLASSIFICATION NOT YET CLEAR-CUT                                                             | protein kinase activity               |
| CA3030 | 1.0 | 1.0 | 1.0 | 1.3 | 1.2 | 1.2 | IPF19968     | complemer putative cell wall protein of the PIR        | orf19.220   | 19968 | IPF19968   | CELL RESCUE DEFENSE AND VIRULENCE ""SUBCELLULAR LOCAL                                        | structural molecule activity          |
| CA3031 | 1.1 | 1.0 | 1.1 | 1.0 | 1.0 | 1.0 | IPF12324     | 10520768..unknown function                             | orf19.217   | 12324 | IPF12324   | TRANSCRIPTION                                                                                | molecular_function unknown            |
| CA3032 | 0.9 | 0.8 | 0.9 | 1.3 | 1.0 | 1.0 | IPF12319     | complemer unknown function                             | orf19.216   | 12319 | IPF12319   | CELL RESCUE DEFENSE AND VIRULENCE                                                            |                                       |
| CA3033 | 0.9 | 0.9 | 0.9 | 0.9 | 1.0 | 1.0 | IPF13202     | 10527690..unknown function                             | orf19.215   | 13202 | IPF13202   | UNCLASSIFIED PROTEINS                                                                        | molecular_function unknown            |
| CA3034 | 1.1 | 1.0 | 1.1 | 1.0 | 1.0 | 1.0 | RPN12        | 10529829..26S proteasome regulatory subun              | orf19.213   | 13198 | CaRPN12    | UNCLASSIFIED PROTEINS                                                                        | peptidase activity                    |
| CA3035 | 1.0 | 1.0 | 1.0 | 0.9 | 1.0 | 1.1 | VPS28        | complemer involved in vacuolar traffic (by hor         | orf19.212   | 13197 | CaVPS28    | CELLULAR TRANSPORT AND TRANSPORT MECHANISMS                                                  | SUBCELL_molecular_function unknown    |
| CA3036 | 1.0 | 1.0 | 0.9 | 0.9 | 1.0 | 0.9 | IPF13443     | 10531753..unknown function                             | orf19.211   | 13443 | IPF13443   | No significant S.c. match                                                                    |                                       |
| CA3037 | 1.0 | 0.9 | 1.0 | 1.0 | 0.9 | 0.9 | IPF13442     | complemer unknown function                             | orf19.210   | 13442 | IPF13442   | UNCLASSIFIED PROTEINS                                                                        | molecular_function unknown            |
| CA3038 | 1.0 | 0.9 | 1.0 | 1.0 | 1.1 | 0.9 | IPF13438     | complemer unknown function                             | orf19.209   | 13438 | IPF13438   | CELL FATE                                                                                    | molecular_function unknown            |
| CA3040 | 0.9 | 1.0 | 1.0 | 1.0 | 1.1 | 1.0 | IPF7306      | complemer putative permease (by homology)              | orf19.2425  | 7306  | IPF7306    | C-compound and carbohydrate metabolism TRANSPORT FACILITATIO                                 | molecular_function unknown            |
| CA3041 | 0.9 | 1.0 | 1.0 | 1.0 | 0.9 | 1.1 | IPF7303      | complemer unknown function                             | orf19.2423  | 7303  | IPF7303    | TRANSCRIPTION SUBCELLULAR LOCALISATION                                                       | molecular_function unknown            |
| CA3042 | 1.0 | 1.1 | 1.0 | 1.0 | 1.0 | 1.1 | ARC1         | 10548031..G4 nucleic acid binding protein (by          | orf19.2422  | 7302  | CaARC1     | TRANSCRIPTION SUBCELLULAR LOCALISATION                                                       | RNA binding                           |
| CA3043 | 0.9 | 0.9 | 1.0 | 1.0 | 1.0 | 1.0 | DOM34        | 10549385..probable involvement in me                   | orf19.2419  | 7299  | CaDOM34    | CELL CYCLE AND DNA PROCESSING PROTEIN SYNTHESIS                                              | molecular_function unknown            |
| CA3044 | 1.0 | 1.0 | 1.0 | 0.9 | 0.9 | 0.9 | IPF7298      | complemer unknown function                             | orf19.2418  | 7298  | IPF7298    | No significant S.c. match                                                                    |                                       |
| CA3045 | 1.0 | 1.0 | 0.9 | 0.9 | 1.0 | 1.1 | IPF7297.3    | complemer similar to Saccharomyces cerevisiae Mlc1p    | m           | 7297  | IPF7297.3  | CELL CYCLE AND DNA PROCESSING CELL FATE                                                      | motor activity                        |
| CA3046 | 1.0 | 1.0 | 1.1 | 1.0 | 1.0 | 1.0 | IPF7295      | 10552547..unknown function                             | orf19.2417  | 7295  | IPF7295    | CELL CYCLE AND DNA PROCESSING                                                                | molecular_function unknown            |
| CA3047 | 1.0 | 0.9 | 1.0 | 1.0 | 1.0 | 0.9 | MSE1         | 10555973..Mitochondrial glutamyl-tRNA synth            | orf19.9953  | 7294  | CaMSE1     | PROTEIN SYNTHESIS SUBCELLULAR LOCALISATION                                                   | ligase activity                       |
| CA3048 | 1.0 | 0.9 | 1.0 | 1.0 | 1.0 | 1.0 | IPF14991     | 10559150..unknown function                             | orf19.9950  | 14991 | IPF14991   | UNCLASSIFIED PROTEINS                                                                        | molecular_function unknown            |

|        |     |     |     |     |     |     |            |                                                         |              |       |            |                                                                                           |                                     |
|--------|-----|-----|-----|-----|-----|-----|------------|---------------------------------------------------------|--------------|-------|------------|-------------------------------------------------------------------------------------------|-------------------------------------|
| CA3049 | 0.9 | 1.0 | 1.1 | 0.9 | 1.0 | 0.9 | IPF14990   | complemer unknown function                              | orf19.9949   | 14990 | IPF14990   | UNCLASSIFIED PROTEINS                                                                     | transporter activity                |
| CA3050 | 1.1 | 1.1 | 1.0 | 1.1 | 1.1 | 1.0 | IPF13042   | 10561005..similar to Saccharomyces cerevisi             | orf19.9948   | 13042 | IPF13042   | PROTEIN FATE [folding modification destination] ""CELLULAR TRANSP                         | molecular_function unknown          |
| CA3051 | 1.1 | 1.0 | 1.0 | 1.0 | 1.0 | 1.0 | IPF13043   | 10563863..unknown function                              | orf19.2408   | 13043 | IPF13043   | UNCLASSIFIED PROTEINS                                                                     | molecular_function unknown          |
| CA3052 | 1.1 | 1.0 | 1.0 | 1.0 | 1.0 | 1.1 | DPS1       | 10564964..aspartyl-tRNA synthetase (by hom              | orf19.9945   | 13045 | CaDPS1     | PROTEIN SYNTHESIS SUBCELLULAR LOCALISATION UNCLASSIFIE                                    | ligase activity                     |
| CA3053 | 0.9 | 1.1 | 1.0 | 0.9 | 1.0 | 1.0 | GTR2       | 10567059..GTP-binding protein (by homology              | orf19.9944   | 13046 | CaGTR2     | UNCLASSIFIED PROTEINS                                                                     | hydrolase activity                  |
| CA3055 | 0.9 | 1.0 | 1.0 | 1.0 | 1.0 | 1.1 | HIR2       | complemer Histone transcription regulator (by           | orf19.1177   | 2951  | CaHIR2     | TRANSCRIPTION SUBCELLULAR LOCALISATION                                                    | transcription regulator activity    |
| CA3056 | 1.1 | 1.1 | 1.0 | 1.0 | 1.0 | 1.1 | IPF2953    | complemer similar to Saccharomyces cerevisi             | orf19.4294   | 2953  | IPF2953    | CELLULAR TRANSPORT AND TRANSPORT MECHANISMS SUBCELL                                       | molecular_function unknown          |
| CA3057 | 1.0 | 0.9 | 1.0 | 1.0 | 1.0 | 1.1 | IPF2954    | 10576198..unknown function                              | orf19.4293   | 2954  | IPF2954    | UNCLASSIFIED PROTEINS                                                                     | molecular_function unknown          |
| CA3058 | 1.0 | 0.9 | 1.0 | 1.0 | 1.0 | 1.1 | IPF2955    | complemer unknown function                              | orf19.4292   | 2955  | IPF2955    | PROTEIN FATE [folding modification destination] ""CELLULAR TRANSPORT AND TRANSPORT MECHAN | transporter activity                |
| CA3059 | 1.0 | 1.0 | 1.0 | 1.0 | 0.9 | 1.1 | TRR1       | complemer Thioredoxin reductase (by homolo              | orf19.1176i  | 2959  | CaTRR1     | Nitrogen and sulphur metabolism Nucleotide metabolism                                     | transporter activity                |
| CA3061 | 1.0 | 1.0 | 1.0 | 1.1 | 1.0 | 1.1 | IPF2965    | complemer unknown function                              | orf19.1176;  | 2965  | IPF2965    | C-compound and carbohydrate metabolism                                                    |                                     |
| CA3062 | 1.0 | 1.0 | 1.0 | 1.0 | 1.0 | 1.0 | IPF2968    | complemer unknown function                              | orf19.1176;  | 2968  | IPF2968    | No significant S.c. match                                                                 |                                     |
| CA3063 | 1.0 | 0.9 | 1.0 | 1.1 | 1.0 | 1.0 | IPF2971    | complemer unknown function                              | orf19.4284   | 2971  | IPF2971    | CELL CYCLE AND DNA PROCESSING TRANSCRIPTION                                               | protein kinase activity,enzyme regi |
| CA3064 | 1.0 | 1.0 | 1.0 | 1.0 | 1.0 | 1.0 | IPF2973    | 10589587..unknown function                              | orf19.4283   | 2973  | IPF2973    | PROTEIN FATE [folding modification destination] ""SUBCELLULAR LOCALISATION                |                                     |
| CA3065 | 1.0 | 1.1 | 1.0 | 1.0 | 1.1 | 1.1 | IPF19775   | 10593296..unknown function                              | orf19.1175i  | 19775 | IPF19775   | No significant S.c. match                                                                 |                                     |
| CA3066 | 1.1 | 1.0 | 1.0 | 1.0 | 1.0 | 1.2 | IPF15813   | 10595073..unknown function                              | orf19.4281   | 15813 | IPF15813   | TRANSCRIPTION SUBCELLULAR LOCALISATION                                                    | molecular_function unknown          |
| CA3067 | 0.9 | 0.9 | 0.9 | 0.9 | 1.0 | 1.1 | IPF15811   | complemer unknown function                              | orf19.1175i  | 15811 | IPF15811   | No significant S.c. match                                                                 |                                     |
| CA3068 | 1.1 | 1.0 | 1.0 | 1.0 | 1.0 | 0.9 | LIP2       | 10604170..Secretory lipase                              | secretory li | 6120  | CaLIP2     | Other virulence attributes                                                                |                                     |
| CA3069 | 1.1 | 1.1 | 1.1 | 1.0 | 1.1 | 1.1 | IPF6117    | 10606420..unknown function                              | orf19.4805   | 6117  | IPF6117    | UNCLASSIFIED PROTEINS                                                                     | molecular_function unknown          |
| CA3070 | 1.1 | 1.1 | 1.1 | 0.9 | 1.0 | 1.0 | PPA2       | 10609643..Mitochondrial inorganic pyrophosp             | orf19.4807   | 6114  | CaPPA2     | Phosphate metabolism ENERGY SUBCELLULAR LOCALISATION                                      | hydrolase activity                  |
| CA3071 | 0.9 | 1.0 | 1.0 | 1.0 | 1.1 | 1.0 | NUP188     | complemer Nucleoporin                                   | orf19.4808   | 6113  | CaNUP188   | CELLULAR TRANSPORT AND TRANSPORT MECHANISMS SUBCELL                                       | structural molecule activity        |
| CA3072 | 1.1 | 1.1 | 1.0 | 1.0 | 1.1 | 1.0 | ERG12      | 10616174..Mevalonate kinase (by homology)               | orf19.4809   | 6109  | CaERG12    | Lipid fatty-acid and isoprenoid metabolism ""SUBCELLULAR LOCALISA                         | transferase activity                |
| CA3073 | 1.2 | 1.3 | 1.1 | 1.1 | 1.1 | 1.1 | IPF6108    | complemer putative tricarboxylate carrier (by           | horf19.4811  | 6108  | IPF6108    | TRANSPORT FACILITATION                                                                    | molecular_function unknown          |
| CA3074 | 1.0 | 1.1 | 1.1 | 1.1 | 1.1 | 0.9 | IPF6106    | 10618742..similar to Bacillus halodurans holo           | orf19.4812   | 6106  | IPF6106    | No significant S.c. match                                                                 |                                     |
| CA3075 | 1.1 | 1.1 | 1.0 | 1.0 | 1.2 | 1.1 | IPF6105    | complemer similar to Saccharomyces cerevisi             | orf19.4813   | 6105  | IPF6105    | Nucleotide metabolism Purine ribonucleotide metabolism                                    | ligase activity                     |
| CA3076 | 1.0 | 0.9 | 1.1 | 1.0 | 1.0 | 1.0 | IPF6101.3  | 10621306..unknown function, 3-prime end                 | orf19.4814   | 6101  | IPF6101.3  | No significant S.c. match                                                                 |                                     |
| CA3077 |     |     |     |     |     |     | YTM1       | 10622006..10623406                                      |              |       |            |                                                                                           |                                     |
| CA3078 | 1.1 | 1.0 | 1.0 | 0.9 | 1.0 | 1.0 | IPF19970   | complemer unknown function                              | orf19.4816   | 19970 | IPF19970   | UNCLASSIFIED PROTEINS                                                                     | molecular_function unknown          |
| CA3079 | 1.0 | 1.1 | 1.1 | 1.0 | 1.0 | 1.0 | RAM2       | 10625422..geranylgeranyltransferase type I a            | orf19.4817   | 15519 | CaRAM2     | Lipid fatty-acid and isoprenoid metabolism """"PROTEIN FATE [folding m                    | transferase activity                |
| CA3080 | 1.0 | 1.0 | 0.9 | 1.1 | 1.1 | 1.0 | IPF14634   | complemer APP-binding protein 1 (by homolo              | orf19.4153   | 14634 | IPF14634   | PROTEIN FATE [folding modification destination]                                           |                                     |
| CA3081 | 1.0 | 1.0 | 1.0 | 1.1 | 1.1 | 1.1 | EFT3       | 10638188..translation elongation ftranslation           | orf19.1162i  | 11638 | CaEFT3     | PROTEIN SYNTHESIS TRANSPORT FACILITATION                                                  | translation regulator activity      |
| CA3082 | 1.0 | 1.0 | 1.0 | 0.9 | 1.0 | 0.9 | IPF11627   | 10644145..unknown function                              | orf19.1162i  | 11627 | IPF11627   | No significant S.c. match                                                                 |                                     |
| CA3083 | 1.0 | 1.0 | 1.0 | 1.1 | 1.0 | 1.0 | IPF11262   | 10644491..unknown function                              | orf19.1162i  | 11626 | IPF11262   | Nucleotide metabolism                                                                     | molecular_function unknown          |
| CA3084 | 1.0 | 1.0 | 0.8 | 0.9 | 1.0 | 1.2 | IPF11625   | 10645394..unknown function                              | orf19.4149   | 11625 | IPF11625   | No significant S.c. match                                                                 |                                     |
| CA3085 | 1.0 | 1.1 | 1.0 | 1.0 | 1.1 | 1.0 | IPF17086   | 10647065..unknown function                              | orf19.4148   | 17086 | IPF17086   | No significant S.c. match                                                                 |                                     |
| CA3086 | 1.1 | 1.1 | 1.0 | 1.0 | 1.0 | 1.1 | GLR1       | 10648979..by similarity to S. cerev. and C. alt         | orf19.1162i  | 14902 | CaGLR1     | CELL RESCUE DEFENSE AND VIRULENCE                                                         | transporter activity                |
| CA3087 | 1.1 | 1.0 | 1.0 | 1.0 | 1.0 | 0.9 | SMD3       | complemer core snRNP protein (by homology)              | orf19.1162;  | 14903 | CaSMD3     | TRANSCRIPTION SUBCELLULAR LOCALISATION                                                    | RNA binding                         |
| CA3088 | 1.1 | 1.2 | 1.0 | 1.0 | 1.2 | 1.1 | IPF9826    | 10652887..unknown function                              | orf19.1162   | 9826  | IPF9826    | TRANSCRIPTION SUBCELLULAR LOCALISATION                                                    | transcription regulator activity    |
| CA3089 | 1.0 | 0.9 | 1.0 | 1.0 | 0.9 | 1.0 | IPF9825    | 10656457..unknown function                              |              | 9825  | IPF9825    | UNCLASSIFIED PROTEINS                                                                     | molecular_function unknown          |
| CA3090 | 0.9 | 1.0 | 1.1 | 1.0 | 1.0 | 0.9 | IPF18385   | complemer unknown function                              | orf19.1161i  | 18385 | IPF18385   | UNCLASSIFIED PROTEINS                                                                     | molecular_function unknown          |
| CA3091 | 1.0 | 1.1 | 1.0 | 1.1 | 1.0 | 1.0 | IPF9821.5F | 10659481..unknown function, 5-prime end                 | orf19.1161i  | 19600 | IPF9821.5f | TRANSPORT FACILITATION                                                                    |                                     |
| CA3092 | 0.9 | 0.9 | 1.0 | 1.0 | 1.0 | 1.0 | IPF9821.3F | 10660040..unknown function, 3-prime end                 | orf19.1161i  | 9821  | IPF9821.3f | TRANSPORT FACILITATION                                                                    | transporter activity                |
| CA3093 | 1.0 | 1.0 | 1.0 | 0.9 | 0.9 | 1.0 | TOF1       | complemer Topoisomerase I interacting factor            | orf19.1161;  | 9818  | CaTOF1     | CELL CYCLE AND DNA PROCESSING                                                             | molecular_function unknown          |
| CA3094 | 1.1 | 1.1 | 1.0 | 1.1 | 1.0 | 1.2 | IPF11548   | 10671694..serine/threonine protein kinase (by           | orf19.1133i  | 11548 | IPF11548   | CELL RESCUE DEFENSE AND VIRULENCE                                                         | protein kinase activity             |
| CA3095 | 0.9 | 1.0 | 1.0 | 0.9 | 1.1 | 1.0 | CDC28      | 10674380..CELL DIVISION CONTROL PROT                    | orf19.3856   | 11549 | CaCDC28    | CELL CYCLE AND DNA PROCESSING CELL FATE                                                   | protein kinase activity             |
| CA3096 | 1.1 | 1.0 | 1.1 | 1.0 | 1.0 | 1.0 | IPF11551   | 10675988..unknown function                              | orf19.3858   | 11551 | IPF11551   | UNCLASSIFIED PROTEINS                                                                     |                                     |
| CA3097 | 1.0 | 1.0 | 0.9 | 1.0 | 1.1 | 1.0 | IPF6600    | 10676828..unknown function                              | orf19.3859   | 6600  | IPF6600    | Lipid fatty-acid and isoprenoid metabolism                                                | oxidoreductase activity             |
| CA3098 | 1.1 | 1.0 | 0.9 | 0.9 | 1.1 | 1.0 | SIS1       | 10678451..heat shock protein (by homology)              | orf19.3861   | 6598  | CaSIS1     | CELL CYCLE AND DNA PROCESSING PROTEIN SYNTHESIS SUBCE                                     | chaperone activity                  |
| CA3099 | 1.0 | 1.0 | 0.9 | 1.0 | 1.0 | 0.9 | LST8       | 10679824..required for transport of permease            | orf19.3862   | 6595  | CaLST8     | CELLULAR TRANSPORT AND TRANSPORT MECHANISMS                                               | protein binding                     |
| CA3100 | 1.0 | 1.0 | 1.0 | 1.0 | 0.9 | 0.9 | IPF6594    | complemer unknown function                              | orf19.3863   | 6594  | IPF6594    | TRANSCRIPTION SUBCELLULAR LOCALISATION                                                    |                                     |
| CA3101 | 1.0 | 1.0 | 0.9 | 1.0 | 1.0 | 0.9 | IPF6593    | complemer similar to Saccharomyces cerevisi             | orf19.3865   | 6593  | IPF6593    | TRANSCRIPTION SUBCELLULAR LOCALISATION                                                    | transcription regulator activity    |
| CA3102 | 1.0 | 1.1 | 1.1 | 1.0 | 1.0 | 1.0 | RLP7       | 10689617..ribosomal-like proteins                       | orf19.3867   | 6586  | CaRLP7     | CLASSIFICATION NOT YET CLEAR-CUT                                                          | RNA binding                         |
| CA3103 | 1.0 | 1.1 | 1.1 | 1.0 | 0.9 | 1.0 | IPF12086   | 10696183..unknown function                              | orf19.1390i  | 12086 | IPF12086   | UNCLASSIFIED PROTEINS                                                                     | molecular_function unknown          |
| CA3104 | 0.7 | 1.0 | 0.9 | 0.6 | 0.6 | 0.7 | IPF12084   | 10697034..unknown function                              | orf19.1390i  | 12084 | IPF12084   | UNCLASSIFIED PROTEINS                                                                     | molecular_function unknown          |
| CA3105 | 1.0 | 1.0 | 1.0 | 1.0 | 0.9 | 1.1 | IPF12083   | 10698135..unknown function                              | orf19.6553   | 12083 | IPF12083   | CELLULAR TRANSPORT AND TRANSPORT MECHANISMS SUBCELLULAR LOCALISATION                      |                                     |
| CA3106 | 1.1 | 1.0 | 0.9 | 1.1 | 1.0 | 1.1 | IPF11821   | 10699783..unknown function                              | orf19.6552   | 11821 | IPF11821   | SUBCELLULAR LOCALISATION                                                                  | oxidoreductase activity             |
| CA3107 | 1.0 | 1.0 | 1.0 | 1.1 | 1.1 | 1.0 | GOS1       | complemer SNARE protein of Golgi compartm               | orf19.6551   | 11824 | CaGOS1     | PROTEIN FATE [folding modification destination] ""CELLULAR TRANSP                         | transporter activity                |
| CA3108 | 1.0 | 1.0 | 1.0 | 1.0 | 1.0 | 1.1 | IPF11826   | 10702398..unknown function                              | orf19.6550   | 11826 | IPF11826   | UNCLASSIFIED PROTEINS                                                                     | molecular_function unknown          |
| CA3109 | 1.2 | 1.6 | 1.1 | 1.1 | 1.0 | 1.0 | IPF11829   | complemer unknown function                              | orf19.6548   | 11829 | IPF11829   | Nitrogen and sulphur metabolism                                                           | molecular_function unknown          |
| CA3110 | 1.0 | 0.9 | 0.8 | 0.9 | 1.0 | 1.1 | LPI9       | 10706896..Microtubule-associated protein (by            | orf19.6544   | 15433 | CaLPI9     | CLASSIFICATION NOT YET CLEAR-CUT                                                          | molecular_function unknown          |
| CA3111 | 0.9 | 0.9 | 0.9 | 1.0 | 0.8 | 1.3 | RPL5       | complemer ribosomal protein (by homology)               | orf19.6541   | 10601 | CaRPL5     | PROTEIN SYNTHESIS SUBCELLULAR LOCALISATION                                                | RNA binding                         |
| CA3112 | 0.3 | 0.9 | 1.0 | 0.9 | 0.9 | 0.5 | PFK2       | complemer 6-phosphofructokinase, beta subu              | orf19.6540   | 10598 | CaPFK2     | C-compound and carbohydrate metabolism ENERGY SUBCELLULAR L                               | transferase activity                |
| CA3113 | 1.1 | 1.0 | 0.9 | 1.1 | 1.1 | 1.0 | IPF15737   | 10717001..similar to Saccharomyces cerevisi             | orf19.1389;  | 15737 | IPF15737   | CELL CYCLE AND DNA PROCESSING                                                             | hydrolase activity                  |
| CA3114 | 1.0 | 1.0 | 0.9 | 0.9 | 1.0 | 1.0 | IPF18384   | 10719606..unknown function                              |              | 18384 | IPF18384   | No significant S.c. match                                                                 |                                     |
| CA3115 | 1.0 | 0.6 | 0.9 | 1.1 | 0.6 | 0.7 | ECM33.3    | 10725212..cell wall biogenesis, 3-prime end (by homolog |              | 5366  | CaECM33.3  | CELL CYCLE AND DNA PROCESSING CELL FATE CONTROL OF CEL                                    | molecular_function unknown          |
| CA3116 | 1.1 | 1.1 | 1.1 | 1.1 | 1.0 | 0.9 | LAB2       | complemer LIPOATE BIOSYNTHESIS PROT                     | orf19.3010   | 5364  | CaLAB2     | Metabolism of vitamins cofactors and prosthetic groups                                    | ligase activity                     |
| CA3117 | 0.9 | 1.0 | 1.0 | 1.0 | 1.0 | 0.9 | IPF5363    | 10727856..unknown function                              | orf19.3009   | 5363  | IPF5363    | UNCLASSIFIED PROTEINS                                                                     | molecular_function unknown          |
| CA3118 | 0.9 | 1.0 | 1.0 | 1.0 | 0.9 | 1.0 | COQ4       | 10730084..ubiquinone biosynthesis                       | orf19.3008   | 5361  | CaCOQ4     | Metabolism of vitamins cofactors and prosthetic groups                                    | molecular_function unknown          |
| CA3119 | 1.0 | 0.9 | 1.0 | 1.0 | 1.0 | 1.0 | IPF5360.3  | 10731552..unknown function, 3-prime end                 |              | 5360  | IPF5360.3  | UNCLASSIFIED PROTEINS                                                                     |                                     |
| CA3120 | 1.0 | 1.0 | 1.0 | 1.1 | 1.0 | 0.9 | IPF5358    | complemer unknown function                              | orf19.3007   | 5358  | IPF5358    | UNCLASSIFIED PROTEINS                                                                     | molecular_function unknown          |
| CA3121 | 1.0 | 1.1 | 0.9 | 1.0 | 0.9 | 1.0 | GGA1       | 10733426..Arf-binding protein                           | orf19.3006   | 5357  | CaGGA1     | CELLULAR TRANSPORT AND TRANSPORT MECHANISMS                                               | molecular_function unknown          |
| CA3122 | 1.1 | 1.1 | 1.1 | 1.0 | 1.0 | 0.9 | IPF5356    | complemer unknown function                              | orf19.3004   | 5356  | IPF5356    | UNCLASSIFIED PROTEINS                                                                     | molecular_function unknown          |

|        |     |     |     |     |     |     |              |                                                               |                  |                                                                              |                                    |
|--------|-----|-----|-----|-----|-----|-----|--------------|---------------------------------------------------------------|------------------|------------------------------------------------------------------------------|------------------------------------|
| CA3123 | 1.1 | 1.2 | 0.9 | 0.9 | 1.0 | 1.0 | RPL6.3       | complemer ribosomal protein, 3-pr ribosomal protein L16       | 5354 CaRPL6.3    | PROTEIN SYNTHESIS SUBCELLULAR LOCALISATION                                   | RNA binding                        |
| CA3124 | 1.2 | 1.1 | 1.1 | 1.0 | 1.0 | 1.1 | IPF5353.3    | complemer unknown function, 3-prime end orf19.3003            | 5353 IPF5353.3   | UNCLASSIFIED PROTEINS                                                        | molecular_function unknown         |
| CA3125 | 1.0 | 1.0 | 1.0 | 1.1 | 0.9 | 0.9 | IPF8921.5EOC | complemer unknown function, 5-prime end                       | 8921 IPF8921.5e  | No significant S.c. match                                                    |                                    |
| CA3126 | 1.1 | 1.6 | 1.1 | 1.0 | 1.1 | 1.0 | GCN4         | complemer transcriptional activator transcriptio orf19.1358   | 8919 CaGCN4      | Amino acid metabolism TRANSCRIPTION SUBCELLULAR LOCALISAT                    | DNA binding                        |
| CA3127 | 1.0 | 1.1 | 1.0 | 1.0 | 1.0 | 1.0 | IPF8915      | complemer unknown function orf19.1359                         | 8915 IPF8915     | UNCLASSIFIED PROTEINS                                                        | molecular_function unknown         |
| CA3128 | 1.1 | 1.0 | 1.1 | 1.1 | 1.0 | 0.9 | IPF8914      | complemer unknown function orf19.1360                         | 8914 IPF8914     | CELL CYCLE AND DNA PROCESSING SUBCELLULAR LOCALISATIO                        | molecular_function unknown         |
| CA3129 | 0.9 | 1.0 | 1.0 | 1.0 | 1.0 | 0.9 | OST4         | 10756389..oligosaccharyltransferase oligosaccharyltransferase | 8912 CaOST4      | No significant S.c. match                                                    |                                    |
| CA3130 | 1.0 | 1.0 | 1.0 | 1.0 | 0.9 | 1.0 | TIM23        | 10757192..mitochondrial inner membrane import orf19.1361      | 8911 CaTIM23     | PROTEIN FATE [folding modification destination] ""CELLULAR TRANSP            | transporter activity               |
| CA3131 | 1.1 | 1.1 | 1.1 | 1.0 | 1.0 | 1.1 | IPF8910      | complemer unknown function orf19.1362                         | 8910 IPF8910     | CLASSIFICATION NOT YET CLEAR-CUT                                             |                                    |
| CA3132 | 0.9 | 0.9 | 1.0 | 1.1 | 1.0 | 1.0 | IPF8904      | 10761903..unknown function orf19.1363                         | 8904 IPF8904     | UNCLASSIFIED PROTEINS                                                        | molecular_function unknown         |
| CA3133 | 1.0 | 1.0 | 0.9 | 1.1 | 1.0 | 1.0 | IPF16939     | complemer unknown function orf19.1364                         | 16939 IPF16939   | UNCLASSIFIED PROTEINS                                                        |                                    |
| CA3134 | 1.0 | 1.1 | 1.0 | 0.9 | 1.0 | 1.0 | IPF11499.REF | 10765987..unknown function orf19.1365                         | 19972 IPF11499.r | No significant S.c. match                                                    |                                    |
| CA3135 | 1.0 | 1.0 | 1.0 | 1.0 | 1.0 | 1.0 | IPF8990      | 10767918..unknown function orf19.1366                         | 8990 IPF8990     | No significant S.c. match                                                    |                                    |
| CA3136 | 1.1 | 1.1 | 1.1 | 1.0 | 1.0 | 1.0 | IPF8989      | complemer unknown function orf19.1367                         | 8989 IPF8989     | No significant S.c. match                                                    | molecular_function unknown         |
| CA3137 | 1.0 | 1.0 | 1.0 | 1.0 | 0.9 | 1.0 | IPF8976      | 10779028..unknown function orf19.8949                         | 8976 IPF8976     | No significant S.c. match                                                    |                                    |
| CA3138 | 0.9 | 1.0 | 0.9 | 1.0 | 1.1 | 0.9 | SAP2         | 10790905..aspartic protease secreted as orf19.3708            | 9220 CaSAP2      | PROTEIN FATE [folding modification destination] ""Other virulence attributes |                                    |
| CA3139 | 1.0 | 1.1 | 1.1 | 0.9 | 1.0 | 1.0 | YHB3         | 10795143..flavohemoglobin (by homology) orf19.3710            | 9216 CaYHB3      | CELL RESCUE DEFENSE AND VIRULENCE ""SUBCELLULAR LOCALISATION                 |                                    |
| CA3140 | 1.0 | 1.0 | 1.0 | 1.0 | 1.0 | 1.0 | IPF9214      | 10798230..unknown function orf19.3711                         | 9214 IPF9214     | Metabolism of vitamins cofactors and prosthetic groups                       |                                    |
| CA3141 | 1.0 | 1.0 | 1.1 | 0.9 | 1.0 | 1.0 | IPF9211.3F   | complemer unknown function, 3-prime end orf19.3712            | 9213 IPF9211.3f  | No significant S.c. match                                                    |                                    |
| CA3142 | 1.0 | 1.0 | 1.0 | 1.2 | 1.0 | 1.1 | IPF9211.5F   | complemer unknown function, 3-prime end orf19.3713            | 9211 IPF9211.5f  | No significant S.c. match                                                    |                                    |
| CA3143 | 1.0 | 1.0 | 1.1 | 1.0 | 0.9 | 0.9 | IPF8295      | 10805134..unknown function orf19.3714                         | 8295 IPF8295     | No significant S.c. match                                                    |                                    |
| CA3144 | 1.0 | 1.0 | 1.0 | 1.0 | 1.0 | 1.0 | ASF1         | complemer anti-silencing protein (by homology) orf19.3715     | 8293 CaASF1      | TRANSCRIPTION                                                                | protein binding                    |
| CA3145 | 0.9 | 1.0 | 1.0 | 0.9 | 0.9 | 0.9 | CDC9         | complemer DNA ligase (by homology) orf19.6155                 | 9796 CaCDC9      | CELL CYCLE AND DNA PROCESSING SUBCELLULAR LOCALISATIO                        | ligase activity                    |
| CA3146 | 1.0 | 1.0 | 0.9 | 0.9 | 1.0 | 1.0 | IPF9797      | complemer unknown function orf19.6156                         | 9797 IPF9797     | No significant S.c. match                                                    | molecular_function unknown         |
| CA3147 | 1.0 | 1.0 | 1.0 | 1.2 | 1.1 | 1.1 | IPF9803      | complemer unknown function orf19.6160                         | 9803 IPF9803     | UNCLASSIFIED PROTEINS                                                        | molecular_function unknown         |
| CA3148 | 1.0 | 1.0 | 1.1 | 1.1 | 0.9 | 1.0 | IPF9808      | 10820281..similar to Saccharomyces cerevisi orf19.6163        | 9808 IPF9808     | CELL CYCLE AND DNA PROCESSING SUBCELLULAR LOCALISATIO                        | DNA binding                        |
| CA3149 | 1.1 | 1.0 | 1.0 | 0.9 | 0.9 | 1.0 | KGD1         | 10822581..2-oxoglutarate dehydrogenase orf19.6165             | 19778 CaKGD1     | C-compound and carbohydrate metabolism ENERGY SUBCELLULAR L                  | oxidoreductase activity            |
| CA3150 | 1.0 | 1.1 | 1.0 | 1.0 | 1.0 | 1.0 | IPF4035      | complemer unknown function orf19.6166                         | 4035 IPF4035     | Lipid fatty-acid and isoprenoid metabolism                                   |                                    |
| CA3151 | 1.0 | 1.0 | 1.0 | 1.0 | 1.0 | 1.1 | IPF4033      | complemer similar to Saccharomyces cerevisi orf19.6167        | 4033 IPF4033     | C-compound and carbohydrate metabolism CELL FATE                             | oxidoreductase activity            |
| CA3152 | 1.0 | 1.0 | 0.9 | 1.0 | 1.0 | 1.0 | IPF4032      | 10830274..unknown function orf19.6168                         | 4032 IPF4032     | CELL CYCLE AND DNA PROCESSING CONTROL OF CELLULAR ORGANIZATION               | SUBCELLULAR LO                     |
| CA3153 | 2.5 | 4.9 | 0.9 | 1.0 | 1.0 | 1.0 | FRP2         | 10834721..member of the FRP family of prote orf19.6169        | 4028 CaFRP2      | C-compound and carbohydrate metabolism                                       |                                    |
| CA3154 | 1.0 | 1.0 | 1.1 | 1.0 | 1.0 | 1.0 | FUN34.5EOC   | 10836621..unknown function, 5-prime end                       | 18376 CaFUN34.!  | C-compound and carbohydrate metabolism                                       |                                    |
| CA3156 | 1.0 | 0.9 | 1.0 | 1.0 | 1.0 | 0.9 | IPF14455     | 10837414..similar to Saccharomyces cerevisi orf19.1589        | 14455 IPF14455   | TRANSCRIPTION SUBCELLULAR LOCALISATION                                       | transcription regulator activity   |
| CA3157 | 1.0 | 1.0 | 0.9 | 1.1 | 1.0 | 1.0 | IPF14456     | complemer unknown function orf19.1588                         | 14456 IPF14456   | UNCLASSIFIED PROTEINS                                                        | molecular_function unknown         |
| CA3158 | 1.0 | 1.0 | 1.0 | 1.0 | 1.0 | 1.0 | IPF13131.3   | 10841576..unknown function, 3-prime end orf19.1587            | 13131 IPF13131.! | C-compound and carbohydrate metabolism TRANSPORT FACILITATION                |                                    |
| CA3159 | 1.0 | 1.1 | 1.0 | 1.0 | 0.9 | 1.0 | PLC3         | 10843487..phosphatidylinositol phospholipase orf19.1586       | 13130 CaPLC3     | TRANSCRIPTION SUBCELLULAR LOCALISATION                                       |                                    |
| CA3160 | 1.5 | 2.4 | 1.4 | 1.9 | 1.2 | 1.3 | ZRT2         | complemer zinc transport protein (by homolog orf19.1585       | 13128 CaZRT2     | REGULATION OF/INTERACTION WITH CELLULAR ENVIRONMENT                          | transporter activity               |
| CA3161 | 0.9 | 1.0 | 1.1 | 1.0 | 0.9 | 1.1 | IPF13121.3   | complemer unknown function, 3-prime end orf19.1584            | 13121 IPF13121.! | TRANSPORT FACILITATION                                                       |                                    |
| CA3162 | 1.0 | 1.1 | 1.0 | 0.9 | 1.1 | 1.0 | HOL5.3F      | complemer member of major facilitator superfe orf19.1583      | 13181 CaHOL5.3i  | CELL RESCUE DEFENSE AND VIRULENCE ""TRANSPORT FACILITATION                   |                                    |
| CA3163 | 1.1 | 1.0 | 1.0 | 1.1 | 1.0 | 0.9 | HOL5.5F      | complemer member of major facilitator superfe orf19.1582      | 13183 CaHOL5.5i  | CELL RESCUE DEFENSE AND VIRULENCE ""TRANSPORT FACILITATION                   |                                    |
| CA3164 | 1.0 | 1.0 | 1.0 | 1.0 | 0.9 | 1.0 | IPF13187     | 10852889..unknown function orf19.1580                         | 13187 IPF13187   | No significant S.c. match                                                    |                                    |
| CA3165 | 1.0 | 1.0 | 1.0 | 1.0 | 1.0 | 1.0 | FMI1         | complemer processing of pre-ribosomal RNA orf19.1578          | 9638 CaFMI1      | TRANSCRIPTION SUBCELLULAR LOCALISATION                                       | RNA binding                        |
| CA3166 | 1.0 | 1.0 | 1.0 | 1.0 | 1.0 | 1.0 | IPF9634      | complemer probable GATA zinc finger transcr orf19.1577        | 9634 IPF9634     | UNCLASSIFIED PROTEINS                                                        | DNA binding,transcription regulato |
| CA3167 | 1.1 | 1.1 | 1.0 | 1.0 | 1.1 | 1.1 | IPF9632      | complemer unknown function orf19.1576                         | 9632 IPF9632     | UNCLASSIFIED PROTEINS                                                        |                                    |
| CA3168 | 1.0 | 1.1 | 1.0 | 1.0 | 1.0 | 0.9 | PRS3         | complemer ribose-phosphate pyro ribose-phos orf19.1575        | 9631 CaPRS3      | Amino acid metabolism Nucleotide metabolism Purine ribonucleotide m          | transferase activity               |
| CA3169 | 1.0 | 1.0 | 1.1 | 1.2 | 1.1 | 1.1 | IPF7686      | 10873121..putative mitochondrial phosphate orf19.1395         | 7686 IPF7686     | Phosphate metabolism CELLULAR TRANSPORT AND TRANSPORT                        | MImolecular_function unknown       |
| CA3170 | 1.0 | 1.0 | 1.0 | 1.0 | 1.0 | 1.0 | IPF7685      | complemer putative GTPase activating protein orf19.1396       | 7685 IPF7685     | UNCLASSIFIED PROTEINS                                                        | enzyme regulator activity          |
| CA3171 | 0.9 | 0.9 | 1.1 | 1.0 | 1.0 | 1.1 | IPF7681      | 10877654..unknown function orf19.1397                         | 7681 IPF7681     | Lipid fatty-acid and isoprenoid metabolism                                   |                                    |
| CA3172 | 1.0 | 1.1 | 1.0 | 1.0 | 1.0 | 1.0 | IPF7676      | 10879160..unknown function orf19.1400                         | 7679 IPF7676     | No significant S.c. match                                                    |                                    |
| CA3173 | 0.9 | 0.9 | 1.1 | 1.0 | 1.0 | 0.9 | IPF14145     | complemer unknown function putative re orf19.1401             | 14145 IPF14145   | No significant S.c. match                                                    |                                    |
| CA3174 | 1.0 | 1.1 | 1.1 | 1.0 | 1.1 | 1.1 | CCT2         | 10888438..chaperonin of the TCP1 ring comp orf19.1402         | 11584 CaCCT2     | UNCLASSIFIED PROTEINS                                                        | chaperone activity                 |
| CA3175 | 1.0 | 0.9 | 1.0 | 0.9 | 1.0 | 1.0 | IPF11587     | 10890905..unknown function orf19.1403                         | 11587 IPF11587   | CELLULAR TRANSPORT AND TRANSPORT MECHANISMS                                  | transporter activity               |
| CA3176 | 1.0 | 0.9 | 1.0 | 1.0 | 1.0 | 1.0 | IPF11588     | complemer unknown function orf19.1404                         | 11588 IPF11588   | UNCLASSIFIED PROTEINS                                                        |                                    |
| CA3177 | 0.9 | 1.0 | 1.0 | 1.0 | 1.0 | 1.1 | IPF11589     | complemer similar to Saccharomyces cerevisi orf19.1405        | 11589 IPF11589   | Phosphate metabolism SUBCELLULAR LOCALISATION                                |                                    |
| CA3178 | 0.9 | 1.0 | 0.9 | 1.0 | 0.9 | 1.1 | IPF19974     | complemer unknown function orf19.1406                         | 19974 IPF19974   | CELL CYCLE AND DNA PROCESSING                                                |                                    |
| CA3179 | 1.0 | 1.1 | 0.9 | 1.0 | 1.0 | 1.0 | YLF2         | 10901693..GTP-binding protein orf19.2128                      | 12246 CaYLF2     | UNCLASSIFIED PROTEINS                                                        | molecular_function unknown         |
| CA3180 | 1.0 | 1.0 | 1.0 | 1.0 | 1.0 | 1.1 | IPF12244     | complemer unknown function orf19.2131                         | 12244 IPF12244   | UNCLASSIFIED PROTEINS                                                        | ligase activity                    |
| CA3181 | 1.0 | 0.9 | 1.1 | 1.0 | 1.1 | 1.0 | IPF12241     | complemer unknown function orf19.2132                         | 12241 IPF12241   | UNCLASSIFIED PROTEINS                                                        |                                    |
| CA3182 | 1.0 | 1.1 | 1.0 | 1.0 | 1.0 | 1.0 | LIP4         | 10908164..secretory lipase secretory li orf19.2133            | 15657 CaLIP4     | Other virulence attributes                                                   |                                    |
| CA3183 | 1.0 | 1.1 | 1.0 | 1.0 | 1.0 | 1.1 | TSM1.3F      | complemer component of TFIID complex, 3-pr orf19.2135         | 15656 CaTSM1.3i  | TRANSCRIPTION SUBCELLULAR LOCALISATION                                       | transcription regulator activity   |
| CA3184 | 1.0 | 0.9 | 1.0 | 0.9 | 1.0 | 1.0 | TSM1.5F      | complemer component of TFIID complex, 5-pr orf19.2136         | 13636 CaTSM1.5i  | TRANSCRIPTION SUBCELLULAR LOCALISATION                                       |                                    |
| CA3185 | 1.0 | 1.0 | 1.1 | 1.0 | 1.0 | 0.9 | IPF13637     | complemer unknown function orf19.2137                         | 13637 IPF13637   | No significant S.c. match                                                    |                                    |
| CA3186 | 1.1 | 0.9 | 1.0 | 1.0 | 1.1 | 1.0 | ILS1         | 10915617..isoleucyl-tRNA synthetase (by hon orf19.2138        | 13644 CaILS1     | PROTEIN SYNTHESIS SUBCELLULAR LOCALISATION                                   | ligase activity                    |
| CA3187 | 1.0 | 1.1 | 1.0 | 0.9 | 1.1 | 1.0 | IPF17094     | complemer unknown function orf19.2143                         | 17094 IPF17094   | UNCLASSIFIED PROTEINS                                                        | molecular_function unknown         |
| CA3188 | 0.9 | 1.0 | 0.9 | 1.0 | 1.0 | 1.0 | IPF11610     | complemer similar to Saccharomyces cerevisi orf19.2146        | 11610 IPF11610   | TRANSCRIPTION ""PROTEIN FATE [folding modification destination] ""           | transferase activity               |
| CA3189 | 1.0 | 1.0 | 1.0 | 1.0 | 1.0 | 1.0 | IPF11607     | complemer unknown function orf19.2149                         | 11607 IPF11607   | REGULATION OF/INTERACTION WITH CELLULAR ENVIRONMENT                          | TI molecular_function unknown      |
| CA3190 | 1.0 | 1.0 | 0.9 | 0.9 | 1.0 | 1.0 | IPF11603     | 10926058..unknown function orf19.2150                         | 11603 IPF11603   | ENERGY SUBCELLULAR LOCALISATION                                              | transporter activity               |
| CA3191 | 1.1 | 1.0 | 1.0 | 0.9 | 0.9 | 1.1 | IPF11601     | 10927146..unknown function orf19.2151                         | 11601 IPF11601   | CLASSIFICATION NOT YET CLEAR-CUT                                             | molecular_function unknown         |
| CA3192 | 1.0 | 0.9 | 1.0 | 1.0 | 1.0 | 0.9 | IPF11598     | 10929664..by homology to S. cerv CaNAG5 [ orf19.2154          | 11598 IPF11598   | C-compound and carbohydrate metabolism ENERGY SUBCELLULAR LOCALISATION       |                                    |
| CA3193 | 0.9 | 1.0 | 1.0 | 1.1 | 1.0 | 1.0 | IPF3418      | complemer unknown function orf19.6170                         | 3418 IPF3418     | CELL CYCLE AND DNA PROCESSING CELL FATE SUBCELLULAR LOCALISATION             | protein binding                    |
| CA3194 | 1.0 | 0.9 | 1.0 | 1.0 | 0.9 | 1.0 | IPF3425      | complemer unknown function orf19.6171                         | 3423 IPF3425     | CELLULAR TRANSPORT AND TRANSPORT MECHANISMS SUBCELL                          | structural molecule activity       |
| CA3195 | 0.9 | 1.0 | 1.0 | 1.1 | 1.1 | 1.0 | IPF3426      | 10936551..unknown function orf19.6173                         | 3426 IPF3426     | C-compound and carbohydrate metabolism TRANSCRIPTION                         | enzyme regulator activity          |

|        |     |     |     |     |     |     |              |                                                  |                         |       |            |                                                                                                |                                  |
|--------|-----|-----|-----|-----|-----|-----|--------------|--------------------------------------------------|-------------------------|-------|------------|------------------------------------------------------------------------------------------------|----------------------------------|
| CA3196 | 1.1 | 0.9 | 1.1 | 0.9 | 1.0 | 1.1 | IPF3428      | complemer unknown function                       | orf19.6175              | 3428  | IPF3428    | UNCLASSIFIED PROTEINS                                                                          | molecular_function unknown       |
| CA3197 | 0.9 | 0.9 | 0.9 | 1.1 | 1.0 | 1.1 | SEC61        | complemer ER protein-translocatoc                | SEC61 pro orf19.6176    | 3431  | CaSEC61    | PROTEIN FATE [folding modification destination] ""CELLULAR TRANSP                              | transporter activity             |
| CA3198 | 1.0 | 1.0 | 1.0 | 1.0 | 0.9 | 1.0 | IPF3432      | 10939919..Unknown function                       | unknown [C orf19.6177   | 3432  | IPF3432    | No significant S.c. match                                                                      |                                  |
| CA3199 | 1.0 | 1.0 | 0.9 | 0.9 | 1.0 | 0.9 | FBP1         | 10940393..Fructose-1,6-bisphosp                  | putative fru orf19.6178 | 3435  | CaFBP1     | C-compound and carbohydrate metabolism ENERGY SUBCELLULAR L                                    | hydrolase activity               |
| CA3200 | 1.1 | 1.0 | 1.0 | 1.0 | 1.0 | 1.0 | IPF3439      | 10941463..unknown function                       | orf19.6180              | 3439  | IPF3439    | UNCLASSIFIED PROTEINS                                                                          | transporter activity             |
| CA3201 | 1.0 | 0.9 | 1.1 | 1.0 | 1.0 | 1.0 | IPF3444.3F   | complemer unknown function, 3-prime end          | orf19.6182              | 3443  | IPF3444.3f | Lipid fatty-acid and isoprenoid metabolism ""TRANSCRIPTION SUBCELLULAR LOCALISATION            |                                  |
| CA3202 | 1.0 | 1.0 | 1.0 | 1.0 | 1.1 | 0.9 | IPF3444.5F   | complemer unknown function, 5-prime end          | orf19.6184              | 3444  | IPF3444.5f | No significant S.c. match                                                                      |                                  |
| CA3203 | 1.1 | 1.1 | 0.9 | 0.9 | 1.0 | 1.1 | IPF3445      | 10945425..Unknown function                       | orf19.6183              | 3445  | IPF3445    | PROTEIN FATE [folding modification destination] ""CELLULAR TRANSP                              | transporter activity             |
| CA3204 | 1.0 | 1.0 | 1.0 | 1.0 | 1.0 | 1.0 | IPF3446      | complemer Unknown function                       | orf19.6186              | 3446  | IPF3446    | UNCLASSIFIED PROTEINS                                                                          |                                  |
| CA3205 | 1.0 | 1.0 | 1.0 | 1.0 | 1.0 | 1.0 | IPF3448      | 10946634..Unknown function                       | orf19.6185              | 3448  | IPF3448    | No significant S.c. match                                                                      |                                  |
| CA3206 | 1.0 | 1.0 | 1.0 | 1.0 | 1.0 | 1.0 | IPF3454      | 10947640..unknown function                       | orf19.6187              | 3454  | IPF3454    | No significant S.c. match                                                                      |                                  |
| CA3207 | 1.0 | 1.0 | 0.9 | 1.0 | 1.0 | 1.0 | IPF3456      | 10948707..unknown function                       | orf19.6189              | 3456  | IPF3456    | UNCLASSIFIED PROTEINS                                                                          | molecular_function unknown       |
| CA3208 | 1.0 | 0.9 | 0.9 | 1.0 | 1.0 | 1.1 | PSA1         | complemer GDP-mannose pyroph                     | GDP-mann orf19.6190     | 3458  | CaPSA1     | C-compound and carbohydrate metabolism CONTROL OF CELLULAR C                                   | nucleotidyltransferase activity  |
| CA3209 | 1.0 | 0.8 | 0.6 | 0.4 | 0.7 | 0.9 | CTA2.5.3F    | complemer transcriptional activator, 3-prime end |                         | 3460  | CaCTA2.5   | No significant S.c. match                                                                      |                                  |
| CA3211 | 1.0 | 1.0 | 1.0 | 0.9 | 1.0 | 1.0 | IPF19977     | complemer unknown function                       | orf19.6192              | 19977 | IPF19977   | Lipid fatty-acid and isoprenoid metabolism ""SUBCELLULAR LOCALISATION                          |                                  |
| CA3212 | 1.0 | 1.0 | 1.0 | 1.0 | 1.0 | 0.9 | MEF2         | 10966922..translation elongation factor (by h    | corf19.6208             | 8163  | CaMEF2     | PROTEIN SYNTHESIS SUBCELLULAR LOCALISATION                                                     | translation regulator activity   |
| CA3213 | 1.0 | 1.0 | 1.1 | 1.0 | 1.0 | 1.0 | IPF8160      | 10969537..unknown function                       | orf19.6205              | 8160  | IPF8160    | UNCLASSIFIED PROTEINS                                                                          | molecular_function unknown       |
| CA3214 | 1.2 | 1.2 | 1.0 | 1.0 | 1.2 | 1.0 | PUT3         | complemer putative positive activator of the pr  | orf19.6203              | 8158  | CaPUT3     | Amino acid metabolism TRANSCRIPTION SUBCELLULAR LOCALISAT                                      | transcription regulator activity |
| CA3215 | 1.1 | 1.1 | 0.9 | 0.9 | 0.9 | 1.0 | HCS1         | complemer putative DNA helicase A (by homo       | orf19.6199              | 13040 | CaHCS1     | CELL CYCLE AND DNA PROCESSING                                                                  | DNA binding,helicase activity    |
| CA3216 | 0.9 | 1.0 | 1.0 | 1.0 | 0.9 | 1.1 | IPF13038     | complemer unknown function                       |                         | 13038 | IPF13038   | No significant S.c. match                                                                      | molecular_function unknown       |
| CA3217 | 1.0 | 1.1 | 1.0 | 1.0 | 1.1 | 1.0 | DHH1         | complemer RNA helicase by homology               | orf19.6197              | 19979 | CaDHH1     | TRANSCRIPTION SUBCELLULAR LOCALISATION                                                         | protein binding                  |
| CA3218 | 0.9 | 1.1 | 1.0 | 1.0 | 1.0 | 1.1 | IPF10005     | 10989742..unknown function                       | orf19.6196              | 10005 | IPF10005   | No significant S.c. match                                                                      |                                  |
| CA3219 | 1.1 | 1.0 | 1.0 | 1.1 | 1.1 | 1.1 | IPF10003     | complemer similar to Saccharomyces cerevisi      | orf19.6195              | 10003 | IPF10003   | Nucleotide metabolism                                                                          | RNA binding,hydrolase activity   |
| CA3220 | 1.0 | 1.0 | 1.0 | 1.0 | 0.8 | 0.9 | IPF10001     | complemer unknown function                       | orf19.6194              | 10001 | IPF10001   | No significant S.c. match                                                                      |                                  |
| CA3221 | 1.0 | 1.0 | 1.0 | 1.0 | 0.9 | 1.0 | IPF10000.5EC | 10994663..unknown function, 5-prime end          | orf19.6193              | 10000 | IPF10000.5 | CELL CYCLE AND DNA PROCESSING TRANSCRIPTION SUBCELLUL                                          | protein kinase activity          |
| CA3222 | 0.9 | 0.9 | 1.0 | 1.0 | 1.0 | 1.0 | IPF15883     | complemer unknown function                       | orf19.6283              | 17135 | IPF15883   | Nitrogen and sulphur metabolism REGULATION OF/INTERACTION WITH CELLULAR ENVIRONMENT            |                                  |
| CA3223 | 1.0 | 1.0 | 1.0 | 1.0 | 1.0 | 0.9 | SRP102       | 10999078..Signal recognition particle recepto    | orf19.6284              | 17133 | CaSRP102   | PROTEIN FATE [folding modification destination] ""SUBCELLULAR LOCALISATION                     |                                  |
| CA3224 | 1.1 | 1.0 | 1.0 | 1.2 | 1.1 | 1.1 | GLC7         | complemer Ser/thr phosphoprotein phosphata       | orf19.6285              | 18366 | CaGLC7     | C-compound and carbohydrate metabolism ENERGY CELL CYCLE ANC                                   | protein phosphatase activity     |
| CA3225 | 0.9 | 1.0 | 0.9 | 0.9 | 0.9 | 1.0 | IPF9329      | 11003785..unknown function                       | orf19.6286              | 9329  | IPF9329    | UNCLASSIFIED PROTEINS                                                                          | molecular_function unknown       |
| CA3226 | 1.0 | 1.0 | 1.1 | 0.9 | 1.0 | 1.0 | RPS27        | 11005478..ribosomal protein S27 (by homology)    |                         | 9327  | CaRPS27    | PROTEIN SYNTHESIS SUBCELLULAR LOCALISATION                                                     | structural molecule activity     |
| CA3227 | 1.2 | 1.1 | 1.0 | 1.0 | 1.0 | 1.1 | AAT21        | complemer aspartate aminotransferase (by ho      | orf19.6287              | 9326  | CaAAT21    | Amino acid metabolism Nitrogen and sulphur metabolism SUBCELLUL                                | transferase activity             |
| CA3228 | 1.0 | 0.9 | 1.0 | 0.9 | 1.0 | 0.9 | IPF9325      | 11007926..unknown function                       | orf19.6288              | 9325  | IPF9325    | No significant S.c. match                                                                      |                                  |
| CA3229 | 1.0 | 1.0 | 1.0 | 1.0 | 1.0 | 1.0 | FUN30        | complemer helicases of the Snf2/Rad54 family     | orf19.6291              | 9324  | CaFUN30    | CELL CYCLE AND DNA PROCESSING SUBCELLULAR LOCALISATIO                                          | molecular_function unknown       |
| CA3230 | 1.1 | 1.0 | 1.0 | 1.0 | 1.0 | 0.9 | EMP24        | complemer component of the COPII-coated ve       | orf19.6293              | 9318  | CaEMP24    | CELLULAR TRANSPORT AND TRANSPORT MECHANISMS SUBCELL                                            | molecular_function unknown       |
| CA3231 | 1.0 | 1.0 | 1.0 | 1.0 | 0.9 | 1.0 | IPF14348.3   | complemer unknown function, 3-prime end          |                         | 14348 | IPF14348.3 | No significant S.c. match                                                                      |                                  |
| CA3232 | 0.9 | 1.0 | 0.9 | 1.0 | 1.0 | 1.0 | IPF17727.3   | 11016729..unknown function, 3-prime end          |                         | 14351 | IPF17727.3 | No significant S.c. match                                                                      |                                  |
| CA3233 | 0.9 | 0.9 | 1.0 | 1.0 | 1.0 | 1.0 | MYO1         | 11018670..myosin-1 isoform (type II myosin) l    | orf19.6294              | 10851 | CaMYO1     | CELL CYCLE AND DNA PROCESSING CELLULAR TRANSPORT AND                                           | motor activity                   |
| CA3234 | 1.1 | 1.0 | 0.9 | 1.0 | 0.9 | 1.0 | MAS2         | complemer processing peptidase, catalytic 531    | orf19.6295              | 10850 | CaMAS2     | PROTEIN FATE [folding modification destination] ""SUBCELLULAR LOC                              | peptidase activity               |
| CA3235 | 1.0 | 0.9 | 1.0 | 1.0 | 1.0 | 1.0 | SNF8         | 11027752..involved in glucose derepression (     | orf19.6296              | 15696 | CaSNF8     | C-compound and carbohydrate metabolism                                                         | molecular_function unknown       |
| CA3236 | 0.9 | 1.0 | 1.0 | 1.0 | 1.1 | 1.0 | DEG1         | complemer pseudouridine synthase (by homol       | orf19.6297              | 15695 | CaDEG1     | TRANSCRIPTION SUBCELLULAR LOCALISATION                                                         | lyase activity                   |
| CA3237 | 1.0 | 1.1 | 1.0 | 1.0 | 0.9 | 1.0 | SPB4         | 11030097..ATP-dependent RNA helicase of          | orf19.6298              | 15694 | CaSPB4     | TRANSCRIPTION SUBCELLULAR LOCALISATION                                                         | RNA binding,helicase activity    |
| CA3239 | 1.0 | 1.1 | 1.0 | 0.9 | 0.9 | 0.9 | IPF10558     | complemer unknown function                       |                         | 10558 | IPF10558   | PROTEIN SYNTHESIS ""PROTEIN FATE [folding modification destination] ""SUBCELLULAR LOCALISATION |                                  |
| CA3240 | 1.1 | 1.1 | 1.1 | 1.0 | 1.1 | 1.0 | IPF10559     | 11038512..myosin-like protein (by homology)      | orf19.4683              | 10559 | IPF10559   | CELL CYCLE AND DNA PROCESSING SUBCELLULAR LOCALISATION                                         | molecular_function unknown       |
| CA3241 | 1.1 | 1.0 | 1.0 | 1.0 | 1.0 | 1.0 | IPF7493      | 11046547..putative permease (by homology)        | orf19.4682              | 7493  | IPF7493    | C-compound and carbohydrate metabolism CELLULAR TRANSPORT AND TRANSPORT MECHANISMS S           |                                  |
| CA3242 | 1.0 | 1.0 | 1.0 | 1.1 | 1.0 | 1.1 | RAT1         | 11048860..5 -3 Exoribonuclease (by homolo        | orf19.4681              | 7491  | CaRAT1     | TRANSCRIPTION CELLULAR TRANSPORT AND TRANSPORT MECH                                            | RNA binding                      |
| CA3243 | 1.0 | 1.0 | 1.1 | 1.0 | 1.0 | 1.0 | IPF7489      | complemer unknown function                       | orf19.4680              | 7489  | IPF7489    | No significant S.c. match                                                                      |                                  |
| CA3244 | 1.1 | 1.1 | 1.1 | 1.1 | 1.1 | 1.2 | AGP2         | complemer amino-acid permease (by homolo         | orf19.4679              | 7487  | CaAGP2     | Amino acid metabolism TRANSPORT FACILITATION                                                   | transporter activity             |
| CA3245 | 0.8 | 1.1 | 0.9 | 1.0 | 1.0 | 0.9 | IPF19980     | complemer putative lipase (by homology)          | orf19.4678              | 19980 | IPF19980   | Lipid fatty-acid and isoprenoid metabolism                                                     | hydrolase activity               |
| CA3246 | 1.1 | 1.1 | 1.0 | 1.1 | 1.1 | 1.0 | IPF15830     | complemer unknown function                       | orf19.4677              | 15830 | IPF15830   | UNCLASSIFIED PROTEINS                                                                          | molecular_function unknown       |
| CA3247 | 1.0 | 1.0 | 1.1 | 0.9 | 1.0 | 1.0 | IPF15832     | complemer unknown function                       | orf19.4676              | 15832 | IPF15832   | UNCLASSIFIED PROTEINS                                                                          | molecular_function unknown       |
| CA3248 | 1.0 | 0.9 | 1.0 | 1.0 | 1.0 | 1.0 | IPF15834     | 11060569..unknown function                       | orf19.4675              | 15834 | IPF15834   | No significant S.c. match                                                                      |                                  |
| CA3249 | 1.1 | 1.1 | 1.0 | 1.0 | 0.9 | 0.9 | GEF2         | 11068295..Putative voltage-gated chloride ch     | orf19.1121              | 9175  | CaGEF2     | CELLULAR TRANSPORT AND TRANSPORT MECHANISMS REGULATION OF/INTERACTION WITH CE                  |                                  |
| CA3250 | 1.0 | 1.0 | 1.0 | 1.0 | 0.9 | 0.9 | IPF4716      | complemer unknown function                       | orf19.1122              | 4716  | IPF4716    | Nucleotide metabolism CELL CYCLE AND DNA PROCESSING CELLULAR COMMUNICATION/SIGNAL T            |                                  |
| CA3251 | 1.0 | 0.9 | 1.0 | 1.0 | 1.0 | 1.0 | IPF4721      | 11076782..unknown function                       | orf19.3737              | 4721  | IPF4721    | UNCLASSIFIED PROTEINS                                                                          |                                  |
| CA3252 | 1.0 | 1.0 | 1.0 | 1.0 | 1.0 | 0.9 | IPF4722      | complemer unknown function                       | orf19.3738              | 4722  | IPF4722    | No significant S.c. match                                                                      |                                  |
| CA3253 | 1.1 | 0.9 | 1.0 | 1.0 | 1.1 | 1.0 | IPF4724      | complemer unknown function                       | orf19.1122              | 4724  | IPF4724    | No significant S.c. match                                                                      |                                  |
| CA3254 | 1.0 | 0.9 | 0.9 | 1.0 | 1.0 | 0.9 | IPF4728      | 11082297..unknown function                       | orf19.1122              | 4728  | IPF4728    | CELL CYCLE AND DNA PROCESSING SUBCELLULAR LOCALISATION                                         |                                  |
| CA3255 | 1.0 | 1.0 | 1.1 | 1.0 | 1.0 | 1.0 | IPF4729      | 11083186..unknown function                       | orf19.3743              | 4729  | IPF4729    | No significant S.c. match                                                                      |                                  |
| CA3256 | 1.0 | 1.0 | 1.0 | 1.0 | 1.0 | 0.9 | IPF4730      | 11084640..unknown function                       | orf19.1122              | 4730  | IPF4730    | UNCLASSIFIED PROTEINS                                                                          | molecular_function unknown       |
| CA3257 | 1.0 | 1.0 | 1.0 | 1.0 | 1.0 | 0.9 | IFC1         | 11089056..Unknown function                       | orf19.3746              | 4732  | CaIFC1     | TRANSPORT FACILITATION                                                                         |                                  |
| CA3258 | 1.0 | 0.9 | 0.9 | 1.0 | 1.0 | 0.9 | IFC2         | 11095342..Unknown function                       | orf19.1123              | 4737  | CaIFC2     | TRANSPORT FACILITATION                                                                         |                                  |
| CA3259 | 1.0 | 0.9 | 1.0 | 1.0 | 1.0 | 1.0 | IPF7970      | 11100373..unknown function                       | orf19.1020              | 7970  | IPF7970    | No significant S.c. match                                                                      |                                  |
| CA3260 | 1.1 | 1.1 | 1.0 | 1.1 | 1.2 | 1.1 | IPF7968      | 11101858..unknown function                       | orf19.2693              | 7968  | IPF7968    | Nitrogen and sulphur metabolism                                                                |                                  |
| CA3261 | 1.1 | 0.9 | 1.0 | 1.0 | 1.0 | 1.0 | TYR1         | complemer tyrosyl-tRNA synthetase by homol       | orf19.2694              | 5023  | CaTYR1     | PROTEIN SYNTHESIS SUBCELLULAR LOCALISATION                                                     | ligase activity                  |
| CA3262 | 0.9 | 1.0 | 1.0 | 0.9 | 1.0 | 0.9 | UBR11.3      | 11104759..ubiquitin-protein ligase, 3-prime e    | orf19.2695              | 5026  | CaUBR11.3  | PROTEIN FATE [folding modification destination] ""SUBCELLULAR LOC                              | ligase activity                  |
| CA3263 | 1.0 | 1.0 | 1.0 | 1.0 | 1.0 | 1.1 | UBR12        | complemer ubiquitin-protein ligase by homolo     | orf19.2697              | 19781 | CaUBR12    | UNCLASSIFIED PROTEINS                                                                          | ligase activity                  |
| CA3264 | 1.0 | 1.0 | 0.9 | 0.9 | 1.0 | 1.0 | IPF5035      | 11116385..unknown function                       | orf19.2698              | 5035  | IPF5035    | UNCLASSIFIED PROTEINS                                                                          | molecular_function unknown       |
| CA3265 | 1.0 | 1.0 | 0.9 | 1.0 | 1.1 | 1.1 | ABP1         | complemer actin-binding protein (by homology     | orf19.2699              | 5041  | CaABP1     | CELL FATE SUBCELLULAR LOCALISATION                                                             | protein binding                  |
| CA3266 | 0.9 | 1.0 | 1.0 | 0.9 | 1.0 | 1.0 | IPF5045      | complemer unknown function                       | orf19.2703              | 5045  | IPF5045    | UNCLASSIFIED PROTEINS                                                                          | molecular_function unknown       |
| CA3267 | 1.0 | 1.0 | 0.9 | 0.8 | 0.9 | 1.0 | RPS620A      | complemer unknown function                       | orf19.6300              | 20129 | RPS620a    | No significant S.c. match                                                                      |                                  |
| CA3268 | 1.0 | 1.1 | 0.9 | 0.8 | 0.9 | 0.8 | RPS620B      | complemer unknown function                       | orf19.6301              | 19981 | RPS620b    | No significant S.c. match                                                                      |                                  |
| CA3269 | 0.9 | 1.0 | 1.1 | 1.0 | 1.0 | 1.0 | IPF12221     | 11134151..unknown function                       | orf19.6302              | 12221 | IPF12221   | No significant S.c. match                                                                      |                                  |

|        |     |     |     |     |     |     |              |                                                          |            |       |            |                                                                                  |                                                      |                      |
|--------|-----|-----|-----|-----|-----|-----|--------------|----------------------------------------------------------|------------|-------|------------|----------------------------------------------------------------------------------|------------------------------------------------------|----------------------|
| CA3270 | 0.9 | 0.9 | 1.0 | 1.0 | 1.1 | 1.0 | LYS5         | complemer L-aminoadipate-semialdehyde de                 | orf19.6304 | 12222 | CaLYS5     | Amino acid metabolism                                                            | SUBCELLULAR LOCALISATION                             | transferase activity |
| CA3271 | 1.0 | 1.0 | 1.1 | 1.0 | 1.0 | 1.0 | GLY2         | complemer L-threonine aldolase, low-specific             | orf19.6305 | 12223 | CaGLY2     | Amino acid metabolism                                                            |                                                      | lyase activity       |
| CA3272 | 1.0 | 1.0 | 1.0 | 1.1 | 0.9 | 1.0 | ALD4         | 11138987..aldehyde dehydrogenase, mitocho                | orf19.6306 | 12224 | CaALD4     | CLASSIFICATION NOT YET CLEAR-CUT                                                 |                                                      |                      |
| CA3273 | 1.0 | 1.1 | 1.1 | 1.0 | 1.0 | 1.0 | IPF12227.5F  | 11141508..unknown function, 5-prime end                  | orf19.6307 | 19982 | IPF12227.5 | TRANSCRIPTION SUBCELLULAR LOCALISATION                                           |                                                      |                      |
| CA3274 | 1.0 | 0.9 | 1.0 | 0.9 | 1.0 | 1.1 | IPF12227.3F  | 11142865..unknown function, 3-prime end                  | orf19.6308 | 12227 | IPF12227.3 | No significant S.c. match                                                        |                                                      |                      |
| CA3275 | 1.0 | 1.0 | 1.0 | 1.1 | 1.0 | 1.1 | IPF17068     | 11144794..unknown function                               | orf19.6309 | 17068 | IPF17068   | No significant S.c. match                                                        |                                                      |                      |
| CA3276 | 1.1 | 1.0 | 1.0 | 1.0 | 1.0 | 0.9 | IPF6263      | 11148141..unknown function                               | orf19.6310 | 6263  | IPF6263    | No significant S.c. match                                                        |                                                      |                      |
| CA3277 | 1.6 | 2.6 | 1.2 | 1.1 | 1.0 | 1.1 | IPF6266      | complemer unknown function                               | orf19.6311 | 6266  | IPF6266    | No significant S.c. match                                                        |                                                      |                      |
| CA3278 | 1.1 | 1.1 | 1.3 | 1.0 | 1.2 | 1.1 | RPS3         | complemer Ribosomal protein S3.e (by homol               | orf19.6312 | 6267  | CaRPS3     | PROTEIN SYNTHESIS SUBCELLULAR LOCALISATION                                       | structural molecule activity                         |                      |
| CA3279 | 8.2 | 2.1 | 1.0 | 1.0 | 0.9 | 1.0 | IPF6268      | complemer unknown function                               | orf19.6313 | 6268  | IPF6268    | C-compound and carbohydrate metabolism                                           | ""PROTEIN FATE [folding modification destination] "" |                      |
| CA3280 | 1.0 | 1.0 | 1.1 | 1.0 | 1.0 | 1.0 | IPF6269.3    | complemer unknown function, 3-prime end                  |            | 6269  | IPF6269.3  | No significant S.c. match                                                        |                                                      |                      |
| CA3281 | 0.9 | 0.9 | 1.1 | 1.0 | 1.0 | 1.0 | RPB8         | complemer DNA-directed RNA polymerase I, l               | orf19.6314 | 6271  | CaRPB8     | TRANSCRIPTION SUBCELLULAR LOCALISATION                                           | nucleotidyltransferase activity                      |                      |
| CA3282 | 1.0 | 1.0 | 1.0 | 0.9 | 1.0 | 1.0 | IPF6272      | 11159454..unknown function                               | orf19.6315 | 6272  | IPF6272    | No significant S.c. match                                                        |                                                      |                      |
| CA3283 | 0.9 | 1.0 | 1.0 | 1.0 | 1.0 | 1.0 | IPF6274      | 11160497..unknown function                               | orf19.6316 | 6274  | IPF6274    | UNCLASSIFIED PROTEINS                                                            | molecular_function unknown                           |                      |
| CA3284 | 1.0 | 1.0 | 0.9 | 1.0 | 1.0 | 1.2 | ADE6         | 11163386..5-phosphoribosylformyl glycina                 | orf19.6317 | 6279  | CaADE6     | Nucleotide metabolism Purine ribonucleotide metabolism SUBCELLULA                | ligase activity                                      |                      |
| CA3285 | 0.9 | 1.0 | 1.0 | 1.1 | 1.0 | 1.0 | IPF6280      | complemer unknown function                               | orf19.6318 | 6280  | IPF6280    | UNCLASSIFIED PROTEINS                                                            | molecular_function unknown                           |                      |
| CA3286 | 1.0 | 1.0 | 1.0 | 1.0 | 1.0 | 1.0 | UBP3.3EOC    | 11169385..Ubiquitin-specific proteinase, 3-pri           | orf19.6319 | 14298 | CaUBP3.3   | TRANSCRIPTION ""PROTEIN FATE [folding modification destination] ""               | peptidase activity                                   |                      |
| CA3287 | 0.9 | 1.0 | 0.9 | 1.0 | 1.0 | 1.0 | IPF14295     | complemer putative Sed1p-like cell surface p             | orf19.6321 | 14295 | IPF14295   | No significant S.c. match                                                        |                                                      |                      |
| CA3288 | 1.1 | 0.9 | 0.8 | 0.6 | 0.9 | 0.6 | ARD8         | complemer D-arabinitol dehydroge D-arabinito             | orf19.6322 | 14294 | CaARD8     | ENERGY SUBCELLULAR LOCALISATION                                                  |                                                      |                      |
| CA3289 | 1.0 | 1.1 | 1.0 | 1.0 | 1.0 | 1.0 | HPA3         | 11173021..histone and other protein acetyl               | orf19.6323 | 14291 | CaHPA3     | CELL CYCLE AND DNA PROCESSING ""PROTEIN FATE [folding modifi                     | transferase activity                                 |                      |
| CA3290 | 1.1 | 1.0 | 0.9 | 0.9 | 1.1 | 1.0 | IPF5734      | 11173579..unknown function                               | orf19.6324 | 5734  | IPF5734    | UNCLASSIFIED PROTEINS                                                            | molecular_function unknown                           |                      |
| CA3291 | 1.0 | 1.0 | 0.9 | 1.0 | 0.9 | 1.0 | IPF5730      | complemer unknown function                               |            | 5730  | IPF5730    | UNCLASSIFIED PROTEINS                                                            | molecular_function unknown                           |                      |
| CA3292 | 1.0 | 1.0 | 1.0 | 1.0 | 1.0 | 1.0 | IPF5729      | 11176175..unknown function                               | orf19.6326 | 5729  | IPF5729    | No significant S.c. match                                                        |                                                      |                      |
| CA3293 | 1.0 | 1.0 | 1.0 | 1.0 | 1.1 | 1.0 | IPF5726      | 11177065..unknown function                               | orf19.6327 | 5726  | IPF5726    | No significant S.c. match                                                        |                                                      |                      |
| CA3294 | 1.0 | 1.0 | 1.0 | 0.9 | 1.0 | 1.0 | IPF5725      | complemer unknown function                               | orf19.6328 | 5725  | IPF5725    | UNCLASSIFIED PROTEINS                                                            | molecular_function unknown                           |                      |
| CA3295 | 0.9 | 0.9 | 1.0 | 1.0 | 1.0 | 1.0 | IPF5723.EXOM | 11178263..cell surface GPI-anchored protein, orf19.6329  |            | 5723  | IPF5723.e  | No significant S.c. match                                                        |                                                      |                      |
| CA3296 | 1.1 | 1.1 | 1.0 | 0.9 | 1.1 | 1.1 | IPF5723.EXOM | 11179639..cell surface GPI-anchored protein, orf19.6336  |            | 5720  | IPF5723.e  | No significant S.c. match                                                        |                                                      |                      |
| CA3299 | 1.0 | 1.1 | 1.1 | 1.0 | 1.1 | 1.0 | IPF13777     | complemer unknown function                               | orf19.2317 | 13777 | IPF13777   | No significant S.c. match                                                        |                                                      |                      |
| CA3300 | 1.0 | 1.1 | 1.0 | 1.1 | 1.2 | 1.1 | RTG3         | complemer Probable bHLH/zip transcription fa             | orf19.2315 | 13780 | CaRTG3     | C-compound and carbohydrate metabolism TRANSCRIPTION SUBCELL                     | transcription regulator activity                     |                      |
| CA3301 | 1.1 | 1.2 | 1.0 | 1.1 | 1.2 | 1.1 | IPF13782     | complemer unknown function                               | orf19.2314 | 13782 | IPF13782   | CONTROL OF CELLULAR ORGANIZATION                                                 | molecular_function unknown                           |                      |
| CA3302 | 1.0 | 1.1 | 0.9 | 1.0 | 0.9 | 1.1 | IPF13784     | complemer unknown function                               | orf19.2313 | 13784 | IPF13784   | UNCLASSIFIED PROTEINS                                                            |                                                      |                      |
| CA3303 | 1.0 | 1.0 | 1.0 | 0.9 | 1.0 | 0.9 | FRE42        | 11198079..ferric reductase (by homology)                 | orf19.2312 | 15397 | CaFRE42    | REGULATION OF/INTERACTION WITH CELLULAR ENVIRONMENT                              | Other virulence attributes                           |                      |
| CA3304 | 1.0 | 1.0 | 1.0 | 1.1 | 1.0 | 1.2 | RPL82        | 11200750..60S ribosomal protein L7a.e.B (by orf19.2311   |            | 11736 | CaRPL82    | PROTEIN SYNTHESIS SUBCELLULAR LOCALISATION                                       |                                                      |                      |
| CA3305 | 0.9 | 1.0 | 0.8 | 0.7 | 0.8 | 0.9 | RPL29        | 11202094..ribosomal protein, cytosolic(by homology)      |            | 11737 | CaRPL29    | No significant S.c. match                                                        | structural molecule activity                         |                      |
| CA3306 | 1.0 | 1.1 | 0.9 | 1.0 | 0.9 | 1.0 | IPF11738     | 11202754..unknown function                               | orf19.2310 | 11738 | IPF11738   | PROTEIN SYNTHESIS SUBCELLULAR LOCALISATION UNCLASSIFIE                           | molecular_function unknown                           |                      |
| CA3307 | 1.1 | 1.2 | 0.9 | 0.7 | 0.8 | 1.1 | RPL2.3       | complemer ribosomal protein L8, 3-prime end (by homolc   |            | 11739 | CaRPL2.3   | PROTEIN SYNTHESIS SUBCELLULAR LOCALISATION                                       | structural molecule activity                         |                      |
| CA3308 | 1.0 | 1.0 | 1.0 | 1.0 | 0.9 | 0.9 | PET127       | 11206167..component of mitochondrial translo             | orf19.9845 | 11742 | CaPET127   | PROTEIN SYNTHESIS SUBCELLULAR LOCALISATION                                       | molecular_function unknown                           |                      |
| CA3309 | 0.9 | 0.9 | 1.0 | 1.1 | 1.0 | 1.0 | IPF8806      | 11210004..6-phosphofructose-2-kinase (by hcorf19.9844    |            | 8806  | IPF8806    | C-compound and carbohydrate metabolism SUBCELLULAR LOCALISATION                  |                                                      |                      |
| CA3310 | 1.0 | 0.9 | 1.0 | 0.9 | 0.9 | 1.0 | PFS2         | complemer Polyadenylation Factor I subunit (t            | orf19.2307 | 8808  | CaPFS2     | TRANSCRIPTION                                                                    | RNA binding                                          |                      |
| CA3311 | 1.0 | 1.1 | 1.0 | 1.1 | 1.0 | 1.0 | IPF8809      | 11213581..unknown function                               | orf19.2306 | 8809  | IPF8809    | UNCLASSIFIED PROTEINS                                                            | molecular_function unknown                           |                      |
| CA3312 | 1.0 | 1.0 | 1.0 | 1.0 | 0.9 | 0.9 | IPF8810      | complemer unknown function                               | orf19.2305 | 8810  | IPF8810    | PROTEIN FATE [folding modification destination] ""CONTROL OF CELL                | protein binding                                      |                      |
| CA3313 | 0.9 | 1.0 | 1.0 | 1.1 | 1.1 | 1.2 | IPF8811      | complemer unknown function                               | orf19.2304 | 8811  | IPF8811    | UNCLASSIFIED PROTEINS                                                            |                                                      |                      |
| CA3314 | 1.0 | 0.9 | 1.0 | 1.1 | 1.0 | 1.0 | IPF8812      | 11216686..unknown function                               | orf19.2303 | 8812  | IPF8812    | TRANSCRIPTION SUBCELLULAR LOCALISATION                                           | RNA binding                                          |                      |
| CA3315 | 0.9 | 1.0 | 1.0 | 1.0 | 1.0 | 0.9 | IPF8814      | 11217693..unknown function                               | orf19.2302 | 8814  | IPF8814    | No significant S.c. match                                                        |                                                      |                      |
| CA3316 | 1.0 | 1.0 | 1.1 | 1.0 | 1.0 | 1.0 | IPF8817      | 11219488..putative proteasome subunit (by hcorf19.2301   |            | 8817  | IPF8817    | UNCLASSIFIED PROTEINS                                                            | molecular_function unknown                           |                      |
| CA3317 | 0.9 | 0.9 | 1.0 | 1.1 | 1.0 | 1.0 | URM1         | complemer ubiquitin like protein (by homology orf19.2299 |            | 8818  | CaURM1     | PROTEIN FATE [folding modification destination]                                  |                                                      |                      |
| CA3318 | 1.1 | 1.0 | 1.0 | 1.0 | 1.0 | 1.0 | WBP1         | 11221040..Oligosaccharyl transferase beta su             | orf19.2298 | 8820  | CaWBP1     | C-compound and carbohydrate metabolism ""PROTEIN FATE [folding m                 | transferase activity                                 |                      |
| CA3319 | 1.0 | 1.0 | 1.0 | 1.0 | 1.0 | 1.0 | DRS25.3EOC   | 11223914..Probable ATPase, 3-prime end (byorf19.2680     |            | 6900  | CaDRS25.3  | TRANSPORT FACILITATION                                                           | transporter activity                                 |                      |
| CA3320 | 0.9 | 1.0 | 1.0 | 0.9 | 1.0 | 1.0 | IPF6898      | complemer similar to Saccharomyces cerevisi              | orf19.2678 | 6898  | IPF6898    | CELL CYCLE AND DNA PROCESSING SUBCELLULAR LOCALISATIO                            | protein binding,protein kinase activ                 |                      |
| CA3321 | 1.1 | 1.0 | 1.0 | 1.0 | 1.0 | 1.0 | IPF6896.5F   | 11231331..unknown function, 5-prime end                  | orf19.2677 | 6896  | IPF6896.5f | ENERGY                                                                           | hydrolase activity                                   |                      |
| CA3322 | 1.0 | 1.0 | 1.0 | 1.0 | 1.1 | 1.0 | IPF6895.3F   | 11232939..unknown function, 3-prime end                  |            | 6895  | IPF6895.3f | ENERGY                                                                           |                                                      |                      |
| CA3323 | 1.1 | 1.1 | 1.0 | 1.0 | 1.1 | 1.0 | IKI1         | complemer killer toxin insensitive protein               | orf19.2676 | 6894  | CaIKI1     | CLASSIFICATION NOT YET CLEAR-CUT                                                 | transcription regulator activity                     |                      |
| CA3324 | 1.0 | 1.0 | 1.1 | 1.0 | 1.0 | 0.9 | IPF6893      | 11234357..unknown function                               | orf19.2675 | 6893  | IPF6893    | TRANSCRIPTION                                                                    | RNA binding                                          |                      |
| CA3325 | 1.0 | 1.0 | 1.0 | 0.9 | 1.0 | 1.0 | IPF6890      | complemer unknown function                               | orf19.2674 | 6890  | IPF6890    | No significant S.c. match                                                        |                                                      |                      |
| CA3326 | 1.0 | 0.9 | 1.0 | 1.0 | 1.1 | 0.9 | IPF6889      | 11239385..unknown function                               | orf19.2673 | 6889  | IPF6889    | UNCLASSIFIED PROTEINS                                                            | molecular_function unknown                           |                      |
| CA3327 | 1.1 | 1.0 | 1.0 | 1.0 | 1.1 | 1.0 | NCP1         | 11242005..NADPH-cytochrome P450 reducta                  | orf19.2672 | 10561 | CaNCP1     | Lipid fatty-acid and isoprenoid metabolism """"CELL RESCUE DEFENSE               | transporter activity                                 |                      |
| CA3328 | 1.1 | 1.1 | 1.0 | 1.0 | 1.0 | 1.0 | IPF10564     | 11245061..unknown function                               | orf19.2671 | 10564 | IPF10564   | UNCLASSIFIED PROTEINS                                                            |                                                      |                      |
| CA3329 | 1.0 | 0.9 | 1.0 | 0.9 | 1.0 | 1.1 | IPF12162     | complemer Unknown function                               | orf19.2670 | 12162 | IPF12162   | UNCLASSIFIED PROTEINS                                                            | molecular_function unknown                           |                      |
| CA3330 | 1.0 | 1.1 | 1.0 | 1.0 | 1.0 | 0.9 | POL21.3      | complemer pol polyprotein, reversereverse tra            | orf19.2669 | 12161 | CaPOL21.3  | No significant S.c. match                                                        |                                                      |                      |
| CA3331 | 1.0 | 1.0 | 1.0 | 1.0 | 1.1 | 1.0 | POL.3        | complemer Pol part of pCal retrotransposon               |            | 12159 | CaPOL.3    | No significant S.c. match                                                        |                                                      |                      |
| CA3332 | 0.9 | 1.0 | 1.0 | 1.2 | 1.0 | 1.0 | GAG          | complemer GAG protein of pCal retrotranspos              | orf19.2668 | 12158 | CaGAG      | No significant S.c. match                                                        |                                                      |                      |
| CA3333 | 0.9 | 1.0 | 1.0 | 1.0 | 1.0 | 1.0 | CDC48        | 11256925..microsomal ATPase (by homology orf19.9876      |            | 8680  | CaCDC48    | CELL CYCLE AND DNA PROCESSING ""PROTEIN FATE [folding modifi                     | hydrolase activity                                   |                      |
| CA3334 | 1.0 | 0.9 | 1.0 | 1.0 | 1.1 | 1.2 | ALP1         | complemer amino-acid permease (by homolog                | orf19.2337 | 8681  | CaALP1     | Amino acid metabolism CELLULAR TRANSPORT AND TRANSPORT MECHANISMS SUBCELLULAR LO |                                                      |                      |
| CA3335 | 1.0 | 1.0 | 1.0 | 0.9 | 1.0 | 1.0 | IPF8682      | 11262451..unknown function                               | orf19.2336 | 8682  | IPF8682    | CELL FATE                                                                        |                                                      |                      |
| CA3336 | 1.0 | 0.9 | 1.0 | 1.0 | 1.0 | 0.9 | IPF19983     | complemer unknown function                               | orf19.2335 | 19983 | IPF19983   | PROTEIN FATE [folding modification destination]                                  | molecular_function unknown                           |                      |
| CA3337 | 1.0 | 1.0 | 1.0 | 1.0 | 1.0 | 0.9 | IPF13583     | 11264759..unknown function                               | orf19.2334 | 13583 | IPF13583   | C-compound and carbohydrate metabolism CELL CYCLE AND DNA PR                     | molecular_function unknown                           |                      |
| CA3338 | 0.9 | 0.7 | 1.0 | 1.0 | 1.1 | 1.0 | IPF13582     | complemer unknown function                               | orf19.2333 | 13582 | IPF13582   | UNCLASSIFIED PROTEINS                                                            | molecular_function unknown                           |                      |
| CA3339 | 1.0 | 1.0 | 1.0 | 0.9 | 1.0 | 1.0 | IPF20131     | 11269757..unknown function                               | orf19.2332 | 20131 | IPF20131   | CONTROL OF CELLULAR ORGANIZATION                                                 | molecular_function unknown                           |                      |
| CA3340 | 1.0 | 0.9 | 1.0 | 1.0 | 1.0 | 1.0 | ADA2         | complemer general transcriptional adaptor or             | orf19.2331 | 15288 | CaADA2     | TRANSCRIPTION SUBCELLULAR LOCALISATION                                           | transcription regulator activity                     |                      |
| CA3341 | 1.1 | 1.0 | 1.0 | 0.9 | 1.0 | 1.0 | RPS17.3      | 11273133..Ribosomal protein S17, 3-prime end (by homi    |            | 15290 | CaRPS17.3  | PROTEIN SYNTHESIS SUBCELLULAR LOCALISATION                                       | structural molecule activity                         |                      |
| CA3342 | 1.0 | 1.0 | 1.0 | 1.1 | 1.0 | 1.0 | IPF13361     | 11274016..unknown function                               | orf19.2330 | 13361 | IPF13361   | UNCLASSIFIED PROTEINS                                                            | RNA binding                                          |                      |
| CA3343 | 1.0 | 0.9 | 1.0 | 1.0 | 1.0 | 1.1 | IPF13360     | complemer unknown function                               | orf19.2328 | 13360 | IPF13360   | No significant S.c. match                                                        |                                                      |                      |

|        |     |     |     |     |     |     |            |                                                          |            |       |            |                                                                                        |                                     |
|--------|-----|-----|-----|-----|-----|-----|------------|----------------------------------------------------------|------------|-------|------------|----------------------------------------------------------------------------------------|-------------------------------------|
| CA3344 | 1.1 | 1.0 | 1.0 | 1.0 | 1.0 | 1.0 | IPF13359   | complemer unknown function                               | orf19.2326 | 13359 | IPF13359   | CELL CYCLE AND DNA PROCESSING TRANSCRIPTION CELL FATE                                  | molecular_function unknown          |
| CA3345 | 1.0 | 1.0 | 1.0 | 1.0 | 1.0 | 0.9 | IPF13357   | 11278824..unknown function                               | orf19.2325 | 13357 | IPF13357   | TRANSCRIPTION SUBCELLULAR LOCALISATION                                                 | transcription regulator activity    |
| CA3346 | 1.1 | 1.0 | 1.0 | 1.0 | 1.0 | 1.0 | IPF13356   | complemer molybdopterin biosynthesis (by ho              | orf19.2324 | 13356 | IPF13356   | Metabolism of vitamins cofactors and prosthetic groups                                 |                                     |
| CA3347 | 0.9 | 0.9 | 1.0 | 0.9 | 0.8 | 0.9 | ERP5       | complemer protein involved in membrane trafficking (by h |            | 15563 | CaERP5     | PROTEIN FATE [folding modification destination] ""CELLULAR TRANSP                      | molecular_function unknown          |
| CA3348 | 0.9 | 0.9 | 1.1 | 1.0 | 1.0 | 1.0 | RIO1       | complemer unknown function                               | orf19.2320 | 15559 | CaRIO1     | UNCLASSIFIED PROTEINS                                                                  | protein kinase activity             |
| CA3349 | 1.0 | 0.9 | 1.0 | 1.0 | 1.0 | 0.9 | IPF19588   | 11284820..unknown function                               |            | 19588 | IPF19588   | UNCLASSIFIED PROTEINS                                                                  | molecular_function unknown          |
| CA3350 | 1.0 | 0.9 | 1.0 | 1.0 | 1.0 | 1.0 | RPL18A.5   | complemer ribosomal protein S18.e, 5-prime end (by hom   |            | 18348 | CaRPL18A   | PROTEIN SYNTHESIS SUBCELLULAR LOCALISATION                                             |                                     |
| CA3351 | 1.0 | 1.0 | 1.1 | 0.9 | 1.0 | 1.0 | IPF18347   | 11287619..unknown function                               | orf19.9503 | 18347 | IPF18347   | No significant S.c. match                                                              |                                     |
| CA3352 | 1.0 | 1.1 | 1.0 | 0.9 | 1.0 | 1.1 | IPF16194   | complemer unknown function                               | orf19.9501 | 16195 | IPF16194   | CLASSIFICATION NOT YET CLEAR-CUT                                                       | molecular_function unknown          |
| CA3353 | 1.1 | 1.0 | 1.1 | 1.0 | 1.1 | 1.0 | AUR1       | 11290569..aureobasidin-resistance protein                | orf19.9500 | 11286 | CaAUR1     | Lipid fatty-acid and isoprenoid metabolism ""CONTROL OF CELLULAR (transferase activity |                                     |
| CA3354 | 1.0 | 1.0 | 0.9 | 1.0 | 0.9 | 1.0 | IPF11281   | 11294397..similar to Saccharomyces cerevisi              | orf19.9499 | 11281 | IPF11281   | CELLULAR COMMUNICATION/SIGNAL TRANSDUCTION MECHANISM signal transducer activity        |                                     |
| CA3355 | 1.0 | 1.0 | 1.0 | 0.9 | 0.9 | 0.9 | IPF11277   | 11297435..unknown function                               | orf19.9498 | 11277 | IPF11277   | Nucleotide metabolism CELL CYCLE AND DNA PROCESSING CELLULAR COMMUNICATION/SIGNAL T    |                                     |
| CA3356 | 1.0 | 1.0 | 1.0 | 1.0 | 1.0 | 1.0 | IPF9560    | 11300320..unknown function                               | orf19.9497 | 9560  | IPF9560    | CELL RESCUE DEFENSE AND VIRULENCE ""TRANSPORT FACILITATION                             |                                     |
| CA3357 | 1.0 | 1.0 | 1.0 | 1.0 | 1.0 | 1.0 | IPF9562    | complemer similar to Saccharomyces cerevisi              | orf19.1941 | 9562  | IPF9562    | CELL CYCLE AND DNA PROCESSING SUBCELLULAR LOCALISATION structural molecule activity    |                                     |
| CA3358 | 1.0 | 0.9 | 1.0 | 1.1 | 1.0 | 1.0 | IPF19984   | complemer similar to Saccharomyces cerevisi              | orf19.1940 | 19984 | IPF19984   | C-compound and carbohydrate metabolism ""Metabolism of vitamins cof                    | molecular_function unknown          |
| CA3359 | 1.0 | 1.1 | 1.1 | 1.1 | 1.0 | 1.1 | IPF9566    | complemer unknown function                               | orf19.1939 | 9566  | IPF9566    | UNCLASSIFIED PROTEINS                                                                  | molecular_function unknown          |
| CA3360 | 0.9 | 1.0 | 1.0 | 1.0 | 1.0 | 1.0 | IPF9568    | 11307329..unknown function                               | orf19.9493 | 9568  | IPF9568    | No significant S.c. match                                                              |                                     |
| CA3361 | 1.0 | 1.0 | 1.0 | 1.0 | 0.9 | 1.0 | SNF1       | 11308238..serine/threonine protein kinase                | orf19.9491 | 9571  | CaSNF1     | C-compound and carbohydrate metabolism ""CELL RESCUE DEFENSE                           | protein kinase activity             |
| CA3362 | 1.0 | 1.0 | 1.0 | 1.0 | 1.1 | 1.0 | IPF9789    | 11313145..unknown function                               | orf19.9489 | 9789  | IPF9789    | UNCLASSIFIED PROTEINS                                                                  | molecular_function unknown          |
| CA3363 | 1.0 | 0.9 | 1.0 | 1.0 | 1.0 | 1.0 | FRE32      | 11316949..ferric reductase (by homology)                 | orf19.9488 | 9791  | CaFRE32    | REGULATION OF/INTERACTION WITH CELLULAR ENVIRONMENT O oxidoreductase activity          |                                     |
| CA3365 | 0.9 | 1.0 | 1.0 | 1.0 | 1.1 | 1.0 | ALG6       | 11322070..glucosyltransferase (by homology)              | orf19.1843 | 4661  | CaALG6     | C-compound and carbohydrate metabolism ""PROTEIN FATE [folding m                       | transferase activity                |
| CA3366 | 1.1 | 1.0 | 1.0 | 1.1 | 1.1 | 1.0 | FRE43      | 11332963..ferric reductase-like (by homology)            | orf19.9403 | 4664  | CaFRE43    | REGULATION OF/INTERACTION WITH CELLULAR ENVIRONMENT Other virulence attributes         |                                     |
| CA3367 | 1.0 | 1.0 | 0.9 | 1.0 | 0.9 | 1.0 | IPF4667    | 11336168..unknown Function                               | orf19.9405 | 4667  | IPF4667    | C-compound and carbohydrate metabolism ENERGY                                          | lyase activity                      |
| CA3368 | 1.1 | 1.0 | 1.0 | 1.1 | 1.0 | 1.0 | IPF4671    | complemer unknown Function                               | orf19.1849 | 4671  | IPF4671    | UNCLASSIFIED PROTEINS                                                                  | molecular_function unknown          |
| CA3369 | 1.0 | 1.0 | 1.0 | 1.0 | 0.9 | 0.9 | IPF4672    | 11341348..unknown Function                               | orf19.1850 | 4672  | IPF4672    | UNCLASSIFIED PROTEINS                                                                  | protein phosphatase activity        |
| CA3370 | 1.0 | 1.0 | 1.0 | 1.0 | 1.0 | 1.0 | IPF4674    | complemer unknown Function                               | orf19.1852 | 4674  | IPF4674    | UNCLASSIFIED PROTEINS                                                                  | molecular_function unknown          |
| CA3372 | 1.0 | 0.9 | 0.6 | 0.5 | 0.9 | 1.2 | HHF22      | complemer histone H4 (by homology)                       | orf19.1854 | 4677  | CaHHF22    | TRANSCRIPTION SUBCELLULAR LOCALISATION                                                 |                                     |
| CA3373 | 1.0 | 1.0 | 1.0 | 1.0 | 1.0 | 1.0 | SEO1       | 11346465..suppressor of sulfoxide ethionine              | orf19.1855 | 19985 | CaSEO1     | TRANSPORT FACILITATION                                                                 |                                     |
| CA3374 | 1.1 | 1.0 | 1.1 | 1.0 | 1.0 | 1.1 | IPF4683    | complemer unknown Function                               | orf19.1856 | 4683  | IPF4683    | TRANSCRIPTION CELL FATE SUBCELLULAR LOCALISATION                                       | protein binding                     |
| CA3375 | 1.0 | 1.2 | 1.0 | 1.0 | 1.0 | 0.9 | IPF4684    | 11351101..unknown Function                               | orf19.1857 | 4684  | IPF4684    | TRANSCRIPTION SUBCELLULAR LOCALISATION                                                 |                                     |
| CA3376 | 1.0 | 1.0 | 1.2 | 1.1 | 1.1 | 1.2 | LSC2.3EOC2 | 11353073..succinate-CoA ligase beta subunit, 3-prime en  |            | 4686  | CaLSC2.3   | C-compound and carbohydrate metabolism ENERGY                                          |                                     |
| CA3377 | 1.0 | 1.0 | 1.0 | 1.2 | 1.0 | 1.0 | CLF1       | 11357226..pre-mRNA splicing factor (by hom               | orf19.7964 | 8347  | CaCLF1     | CELL CYCLE AND DNA PROCESSING TRANSCRIPTION                                            | molecular_function unknown          |
| CA3378 | 1.0 | 1.0 | 1.0 | 1.0 | 0.9 | 1.0 | RUB1       | complemer ubiquitin-like protein (by homology)           |            | 8348  | CaRUB1     | PROTEIN SYNTHESIS ""PROTEIN FATE [folding modification destination] ""                 | CELL RESCUE DEFENSE A               |
| CA3379 | 1.1 | 0.9 | 1.0 | 0.9 | 1.0 | 1.0 | IPF8350    | 11360004..putative methyltransferase (by hom             | orf19.331  | 8350  | IPF8350    | PROTEIN FATE [folding modification destination]                                        | transferase activity                |
| CA3380 | 1.0 | 1.0 | 0.9 | 0.9 | 1.0 | 1.0 | MSL5       | 11360855..branch point bridging protein (by h            | orf19.329  | 8351  | CaMSL5     | TRANSCRIPTION SUBCELLULAR LOCALISATION                                                 | RNA binding                         |
| CA3381 | 1.0 | 1.0 | 1.0 | 1.0 | 1.1 | 1.1 | NPR2       | 11362697..nitrogen permease regulator (by h              | orf19.328  | 8357  | CaNPR2     | Nitrogen and sulphur metabolism                                                        | molecular_function unknown          |
| CA3382 | 1.0 | 0.9 | 0.9 | 1.0 | 1.0 | 1.0 | HTA3       | 11364932..histone H2A F/Z variant (by homol              | orf19.327  | 8358  | CaHTA3     | SUBCELLULAR LOCALISATION                                                               | DNA binding                         |
| CA3383 | 1.0 | 1.0 | 1.0 | 1.1 | 1.0 | 1.0 | IPF8359    | complemer unknown function                               | orf19.326  | 8359  | IPF8359    | No significant S.c. match                                                              |                                     |
| CA3384 | 1.0 | 1.0 | 1.0 | 1.0 | 1.1 | 1.1 | IPF8362    | complemer similar to Saccharomyces cerevisi              | orf19.325  | 8362  | IPF8362    | TRANSCRIPTION SUBCELLULAR LOCALISATION                                                 | RNA binding                         |
| CA3385 | 0.9 | 1.0 | 1.1 | 1.0 | 1.0 | 1.0 | DRS23      | complemer Membrane-spanning Ca-ATPase (orf19.7955        |            | 6764  | CaDRS23    | TRANSPORT FACILITATION                                                                 |                                     |
| CA3386 | 0.9 | 1.0 | 1.0 | 1.0 | 0.9 | 1.1 | IPF6758    | 11374192..unknown function                               | orf19.7954 | 6758  | IPF6758    | No significant S.c. match                                                              |                                     |
| CA3387 | 0.9 | 0.9 | 1.0 | 1.1 | 0.9 | 1.0 | MUP3       | 11376288..Very low affinity methionine perme             | orf19.7953 | 6757  | CaMUP3     | Amino acid metabolism CELLULAR TRANSPORT AND TRANSPORT M                               | transporter activity                |
| CA3388 | 0.9 | 0.9 | 1.1 | 1.1 | 0.9 | 1.2 | IPF6755    | complemer unknown function                               | orf19.320  | 6755  | IPF6755    | CLASSIFICATION NOT YET CLEAR-CUT                                                       |                                     |
| CA3389 | 1.0 | 1.0 | 0.9 | 1.1 | 1.0 | 1.0 | IPF6754    | 11380356..unknown function                               | orf19.7951 | 6754  | IPF6754    | UNCLASSIFIED PROTEINS                                                                  | molecular_function unknown          |
| CA3390 | 1.0 | 1.0 | 1.1 | 0.9 | 1.0 | 1.0 | CAF17      | 11381000..Component of CCR4 transcriptional complex      |            | 6752  | CaCAF17    | TRANSCRIPTION SUBCELLULAR LOCALISATION                                                 | molecular_function unknown          |
| CA3391 | 0.9 | 1.1 | 1.0 | 1.0 | 1.0 | 0.9 | PNP1       | 11382811..Purine Nucleoside Phosphorylase                | orf19.7949 | 6750  | CaPNP1     | Nucleotide metabolism Purine ribonucleotide metabolism                                 | transferase activity                |
| CA3392 | 1.0 | 1.0 | 0.9 | 0.9 | 1.0 | 1.1 | SEC13      | complemer Protein transport protein                      | orf19.316  | 6749  | CaSEC13    | CELLULAR TRANSPORT AND TRANSPORT MECHANISMS SUBCELL                                    | molecular_function unknown          |
| CA3393 | 0.8 | 1.0 | 1.0 | 1.0 | 1.0 | 1.0 | IPF6748    | 11385023..unknown function                               | orf19.315  | 6748  | IPF6748    | CELL CYCLE AND DNA PROCESSING REGULATION OF/INTERACTIO                                 | molecular_function unknown          |
| CA3394 | 1.0 | 1.0 | 0.9 | 0.9 | 1.0 | 0.9 | IPF6747    | complemer similar to Saccharomyces cerevisi              | orf19.7946 | 6747  | IPF6747    | TRANSCRIPTION                                                                          | transcription regulator activity    |
| CA3395 | 1.1 | 1.0 | 1.0 | 1.0 | 1.1 | 1.0 | IPF13616   | complemer unknown function                               | orf19.3970 | 13616 | IPF13616   | UNCLASSIFIED PROTEINS                                                                  | molecular_function unknown          |
| CA3396 | 1.0 | 0.9 | 1.0 | 1.0 | 1.1 | 1.0 | IPF13617   | 11394387..unknown function                               | orf19.3971 | 13617 | IPF13617   | No significant S.c. match                                                              |                                     |
| CA3397 | 1.0 | 1.0 | 0.9 | 1.0 | 1.0 | 1.0 | IPF13618   | complemer unknown function                               | orf19.3972 | 13618 | IPF13618   | PROTEIN FATE [folding modification destination]                                        | molecular_function unknown          |
| CA3398 | 1.0 | 1.0 | 1.0 | 1.0 | 1.0 | 1.0 | IPF13621   | 11396437..unknown function                               | orf19.3973 | 13621 | IPF13621   | UNCLASSIFIED PROTEINS                                                                  | molecular_function unknown          |
| CA3399 | 0.9 | 1.0 | 1.0 | 1.0 | 1.0 | 1.0 | PUT2       | complemer 1-pyrroline-5-carboxylate dehydro              | orf19.3974 | 13622 | CaPUT2     | Amino acid metabolism SUBCELLULAR LOCALISATION                                         | oxidoreductase activity             |
| CA3400 | 1.0 | 1.0 | 1.0 | 0.9 | 1.0 | 1.0 | JNM1       | complemer mitosis protein, involved in nuclear           | orf19.3976 | 13623 | CaJNM1     | CELL CYCLE AND DNA PROCESSING CELLULAR TRANSPORT AND                                   | structural molecule activity        |
| CA3401 | 1.0 | 1.0 | 0.9 | 0.9 | 1.1 | 1.0 | IPF8652    | complemer putative GTP-binding protein (by h             | orf19.3977 | 8652  | IPF8652    | UNCLASSIFIED PROTEINS                                                                  | molecular_function unknown          |
| CA3402 | 1.0 | 1.1 | 1.0 | 0.9 | 0.9 | 1.0 | IPF8651    | 11402277..unknown function                               | orf19.3978 | 8651  | IPF8651    | UNCLASSIFIED PROTEINS                                                                  | molecular_function unknown          |
| CA3403 | 1.0 | 1.1 | 0.9 | 1.0 | 1.1 | 1.0 | IPF8650    | complemer RNA helicase (by homology)                     | orf19.3980 | 8650  | IPF8650    | CELL RESCUE DEFENSE AND VIRULENCE                                                      | molecular_function unknown          |
| CA3404 | 1.0 | 1.0 | 1.0 | 0.9 | 1.0 | 1.0 | MAL31      | complemer maltose permease (by homology)                 | orf19.3981 | 8647  | CaMAL31    | C-compound and carbohydrate metabolism CELLULAR TRANSPORT A                            | molecular_function unknown          |
| CA3405 | 0.9 | 1.0 | 1.0 | 0.9 | 0.9 | 1.0 | IPF8644    | 11414245..maltase (by homology)                          | orf19.3982 | 8644  | IPF8644    | C-compound and carbohydrate metabolism                                                 | hydrolase activity                  |
| CA3406 | 1.0 | 1.0 | 1.1 | 1.0 | 1.1 | 1.0 | IPF9711    | complemer unknown function                               | orf19.3983 | 9711  | IPF9711    | UNCLASSIFIED PROTEINS                                                                  | molecular_function unknown          |
| CA3407 | 0.9 | 1.0 | 1.1 | 1.0 | 1.0 | 1.0 | IPF9406    | 11426364..unknown function                               | orf19.1357 | 9406  | IPF9406    | No significant S.c. match                                                              |                                     |
| CA3408 | 1.1 | 1.0 | 1.0 | 1.0 | 1.0 | 0.9 | IPF9407    | 11428214..similar to Saccharomyces cerevisi              | orf19.6151 | 9407  | IPF9407    | CELLULAR TRANSPORT AND TRANSPORT MECHANISMS SUBCELL                                    | structural molecule activity        |
| CA3409 | 0.9 | 0.9 | 1.1 | 1.1 | 1.0 | 0.9 | IPF9410    | complemer similar to Saccharomyces cerevisi              | orf19.6148 | 9410  | IPF9410    | CELL CYCLE AND DNA PROCESSING CONTROL OF CELLULAR OR                                   | structural molecule activity        |
| CA3410 | 1.0 | 0.9 | 1.0 | 1.0 | 1.1 | 1.1 | IPF9411    | 11433417..unknown function                               | orf19.6147 | 9411  | IPF9411    | UNCLASSIFIED PROTEINS                                                                  | molecular_function unknown          |
| CA3411 | 1.0 | 1.0 | 0.9 | 0.9 | 1.0 | 1.1 | IPF9413    | complemer unknown function                               | orf19.1356 | 9413  | IPF9413    | CELL CYCLE AND DNA PROCESSING                                                          | protein kinase activity,enzyme regi |
| CA3412 | 1.0 | 1.0 | 1.1 | 1.0 | 1.0 | 1.0 | IPF9238    | complemer long chain fatty alcohol oxidase (b            | orf19.1356 | 9238  | IPF9238    | No significant S.c. match                                                              |                                     |
| CA3413 | 0.9 | 1.0 | 1.0 | 1.0 | 1.0 | 0.9 | IPF9239    | complemer unknown function                               | orf19.6142 | 9239  | IPF9239    | No significant S.c. match                                                              |                                     |
| CA3414 | 1.1 | 1.0 | 1.0 | 1.2 | 1.0 | 1.0 | IPF9240    | complemer probable permease                              | orf19.6141 | 9240  | IPF9240    | C-compound and carbohydrate metabolism CELLULAR TRANSPORT AND TRANSPORT MECHANISMS S   |                                     |
| CA3415 | 1.0 | 1.0 | 1.0 | 1.0 | 1.0 | 1.2 | FRE30.53   | 11443642..Strong similarity to ferric reductase          | orf19.6140 | 17765 | CaFRE30.53 | REGULATION OF/INTERACTION WITH CELLULAR ENVIRONMENT Other virulence attributes         |                                     |
| CA3416 | 1.0 | 1.1 | 1.0 | 1.1 | 1.1 | 1.1 | FRE30.3    | 11444320..Strong similarity to ferric reductase          | orf19.6139 | 17763 | CaFRE30.3  | REGULATION OF/INTERACTION WITH CELLULAR ENVIRONMENT Other virulence attributes         |                                     |
| CA3417 | 0.9 | 1.0 | 0.9 | 1.0 | 1.0 | 1.0 | FRE41      | 11446783..ferric reductase transmembrane c               | orf19.6138 | 12773 | CaFRE41    | REGULATION OF/INTERACTION WITH CELLULAR ENVIRONMENT Other virulence attributes         |                                     |

|        |     |     |     |     |     |     |              |                                                          |                         |       |            |                                                                      |                                                                          |
|--------|-----|-----|-----|-----|-----|-----|--------------|----------------------------------------------------------|-------------------------|-------|------------|----------------------------------------------------------------------|--------------------------------------------------------------------------|
| CA3418 | 1.0 | 1.0 | 1.1 | 1.0 | 1.0 | 1.0 | IPF12777     | 11449360..unknown function                               | orf19.6137              | 12777 | IPF12777   | TRANSCRIPTION SUBCELLULAR LOCALISATION                               |                                                                          |
| CA3419 | 0.9 | 1.1 | 1.0 | 1.0 | 1.0 | 1.0 | IPF12778     | complemer ribosomal protein, mitochondrial (torf19.6136  |                         | 12778 | IPF12778   | PROTEIN SYNTHESIS SUBCELLULAR LOCALISATION                           | structural molecule activity                                             |
| CA3420 | 0.9 | 1.0 | 0.9 | 1.0 | 0.9 | 1.0 | SMX4         | 11452544..U6 snRNA-associated Sm-like protein (by hon    |                         | 12779 | CaSMX4     | TRANSCRIPTION SUBCELLULAR LOCALISATION                               | RNA binding                                                              |
| CA3421 | 1.0 | 1.0 | 0.9 | 1.0 | 1.0 | 1.1 | IPF19782     | complemer unknown function                               | orf19.1355              | 19782 | IPF19782   | CELL CYCLE AND DNA PROCESSING CONTROL OF CELLULAR ORGANIZATION       | SUBCELLULAR LOC                                                          |
| CA3422 | 0.9 | 1.0 | 1.0 | 1.0 | 0.9 | 1.0 | IPF17289     | 11454560..unknown function                               | orf19.1355              | 17289 | IPF17289   | UNCLASSIFIED PROTEINS                                                | molecular_function unknown                                               |
| CA3423 | 1.1 | 1.0 | 0.9 | 1.0 | 1.1 | 1.1 | IPF3549      | complemer unknown function                               | orf19.597               | 3549  | IPF3549    | Nitrogen and sulphur metabolism                                      |                                                                          |
| CA3424 | 0.9 | 1.0 | 1.0 | 1.0 | 1.0 | 1.1 | NOP10        | complemer Nucleolar rRNA processing protein (by homol    |                         | 3544  | CaNOP10    | No significant S.c. match                                            | RNA binding                                                              |
| CA3425 | 1.0 | 1.0 | 1.0 | 1.1 | 1.1 | 1.0 | IPF11873     | complemer similar to Saccharomyces cerevisi              | orf19.593               | 11873 | IPF11873   | CELLULAR TRANSPORT AND TRANSPORT MECHANISMS UNCLAS                   | molecular_function unknown                                               |
| CA3426 | 1.0 | 1.0 | 1.0 | 1.0 | 1.0 | 0.9 | IPF11869     | 11469541..unknown function                               | orf19.592               | 11869 | IPF11869   | UNCLASSIFIED PROTEINS                                                | transferase activity                                                     |
| CA3427 | 0.9 | 1.0 | 1.1 | 1.1 | 1.0 | 1.1 | IPF11865     | complemer unknown function                               | orf19.590               | 11865 | IPF11865   | No significant S.c. match                                            |                                                                          |
| CA3428 | 1.0 | 0.8 | 0.9 | 0.9 | 1.0 | 1.1 | VPS21        | complemer GTP-binding protein (by homology               | orf19.589               | 11863 | CaVPS21    | PROTEIN FATE [folding modification destination]                      | ""CELLULAR TRANSPORT AND TRANSPORT MECHANISMS                            |
| CA3429 | 1.0 | 1.0 | 1.0 | 1.0 | 0.9 | 1.0 | IPF6380      | 11479667..unknown function                               | orf19.588               | 6380  | IPF6380    | UNCLASSIFIED PROTEINS                                                | molecular_function unknown                                               |
| CA3430 | 1.0 | 1.0 | 1.0 | 1.0 | 0.9 | 1.0 | IPF6382      | complemer unknown function                               | orf19.587               | 6382  | IPF6382    | UNCLASSIFIED PROTEINS                                                | molecular_function unknown                                               |
| CA3431 | 1.1 | 1.0 | 1.0 | 1.0 | 1.1 | 1.0 | FUN9         | 11481359..Protein involved in vesicular transp           | orf19.586               | 6383  | CaFUN9     | CELLULAR TRANSPORT AND TRANSPORT MECHANISMS SUBCELL                  | molecular_function unknown                                               |
| CA3432 | 1.0 | 1.0 | 1.0 | 1.0 | 1.0 | 1.0 | MRPL17       | complemer ribosomal protein of the large sub             | orf19.585               | 20133 | CaMRPL17   | PROTEIN SYNTHESIS SUBCELLULAR LOCALISATION                           | structural molecule activity                                             |
| CA3433 | 1.0 | 1.1 | 0.9 | 1.0 | 1.0 | 0.9 | IPF6387.3    | 11484272..unknown function, 3-prime end                  |                         | 6387  | IPF6387.3  | No significant S.c. match                                            |                                                                          |
| CA3434 | 1.0 | 1.1 | 1.0 | 1.0 | 1.0 | 0.9 | CCP1         | 11486211..Cytochrome-c peroxidase precurs                | orf19.584               | 6390  | CaCCP1     | CELL RESCUE DEFENSE AND VIRULENCE                                    | ""SUBCELLULAR LOCAL oxidoreductase activity                              |
| CA3435 | 1.0 | 1.0 | 1.0 | 1.0 | 1.0 | 1.1 | IPF6391      | 11487140..similarity to mammalian indoleam               | orf19.583               | 6391  | IPF6391    | Amino acid metabolism                                                | ""Metabolism of vitamins cofactors and prostheti oxidoreductase activity |
| CA3436 | 1.0 | 1.0 | 0.9 | 1.0 | 1.1 | 0.9 | NRD1         | 11489739..Involved in regulation of nuclear              | prof19.581              | 6394  | CaNRD1     | TRANSCRIPTION SUBCELLULAR LOCALISATION                               | RNA binding                                                              |
| CA3437 | 0.9 | 1.1 | 1.0 | 1.0 | 1.0 | 1.1 | IPF15925     | complemer unknown function                               | orf19.1050              | 15925 | IPF15925   | REGULATION OF/INTERACTION WITH CELLULAR ENVIRONMENT                  | SUBCELLULAR LOCALISATION                                                 |
| CA3438 | 1.0 | 1.0 | 1.0 | 1.0 | 0.9 | 1.2 | IPF11330     | 11495433..unknown function                               | orf19.2987              | 11330 | IPF11330   | UNCLASSIFIED PROTEINS                                                | molecular_function unknown                                               |
| CA3439 | 1.0 | 1.0 | 1.0 | 0.9 | 1.0 | 0.9 | IPF11329     | complemer unknown function                               | orf19.2986              | 11329 | IPF11329   | No significant S.c. match                                            |                                                                          |
| CA3440 | 1.0 | 0.9 | 1.2 | 1.2 | 1.1 | 1.1 | IPF11328     | 11497940..unknown function                               | orf19.2985              | 11328 | IPF11328   | No significant S.c. match                                            |                                                                          |
| CA3441 | 1.0 | 1.0 | 1.0 | 0.9 | 1.0 | 1.0 | MST1         | 11498686..mitochondrial threonyl tRNA synth              | orf19.2984              | 11327 | CaMST1     | SUBCELLULAR LOCALISATION                                             | ligase activity                                                          |
| CA3442 | 1.0 | 0.9 | 1.0 | 1.0 | 1.0 | 1.0 | IPF11326     | complemer similar to Saccharomyces cerevisi              | orf19.2983              | 11326 | IPF11326   | TRANSCRIPTION SUBCELLULAR LOCALISATION                               | transcription regulator activity                                         |
| CA3443 | 1.0 | 1.0 | 1.0 | 1.0 | 1.0 | 1.0 | IPF11324     | 11501524..unknown function                               | orf19.2982              | 11324 | IPF11324   | PROTEIN FATE [folding modification destination]                      | enzyme regulator activity                                                |
| CA3444 | 1.0 | 1.0 | 1.0 | 1.1 | 1.0 | 1.1 | IPF11323     | 11503175..unknown function                               | orf19.2980              | 11323 | IPF11323   | UNCLASSIFIED PROTEINS                                                | molecular_function unknown                                               |
| CA3445 | 1.0 | 0.9 | 0.9 | 0.9 | 1.0 | 0.9 | IPF7325      | 11505637..unknown function                               | unknown h:orf19.2978    | 7325  | IPF7325    | No significant S.c. match                                            |                                                                          |
| CA3446 | 1.0 | 1.0 | 1.0 | 1.1 | 1.0 | 0.9 | IPF7324      | 11506679..unknown function                               | unknown h:orf19.2977    | 7324  | IPF7324    | UNCLASSIFIED PROTEINS                                                | molecular_function unknown                                               |
| CA3447 | 1.1 | 1.1 | 1.0 | 1.0 | 1.0 | 1.0 | YPT70        | complemer GTP-binding protein (b YPT7 hom                | orf19.2975              | 7322  | CaYPT70    | CELLULAR TRANSPORT AND TRANSPORT MECHANISMS SUBCELLULAR LOCALISATION |                                                                          |
| CA3448 | 0.9 | 1.0 | 1.0 | 1.2 | 1.1 | 1.0 | YKT6         | 11509430..Endoplasmic Reticulumprobable s                | orf19.2974              | 7321  | CaYKT6     | PROTEIN FATE [folding modification destination]                      | ""CELLULAR TRANSP transporter activity                                   |
| CA3449 | 1.0 | 1.0 | 1.0 | 1.0 | 1.0 | 1.0 | IPF7320      | complemer unknown function                               | unknown h:orf19.2973    | 7320  | IPF7320    | UNCLASSIFIED PROTEINS                                                | transporter activity                                                     |
| CA3450 | 1.0 | 1.0 | 0.9 | 1.1 | 1.0 | 1.1 | PDE2         | complemer Nucleotide phosphodienucleotide                | orf19.2972              | 7318  | CaPDE2     | Nucleotide metabolism                                                | SUBCELLULAR LOCALISATION                                                 |
| CA3451 | 1.0 | 1.1 | 1.0 | 1.0 | 1.1 | 1.0 | IPF7316      | complemer unknown function                               | orf19.1048              | 7316  | IPF7316    | CELL CYCLE AND DNA PROCESSING CONTROL OF CELLULAR ORGANIZATION       | SUBCELLULAR LOC                                                          |
| CA3452 | 1.0 | 1.0 | 1.1 | 1.0 | 1.1 | 1.0 | IPF10541     | 11523174..unknown function                               | orf19.1253              | 10541 | IPF10541   | Phosphate metabolism                                                 | TRANSCRIPTION SUBCELLULAR LOCALISATION                                   |
| CA3453 | 1.1 | 1.1 | 1.0 | 0.9 | 1.1 | 0.9 | SEC23        | 11525673..Component of COPII coat (by hom                | orf19.1254              | 10536 | CaSEC23    | CELLULAR TRANSPORT AND TRANSPORT MECHANISMS SUBCELL                  | enzyme regulator activity                                                |
| CA3454 | 1.1 | 0.8 | 0.9 | 1.0 | 1.0 | 0.9 | IPF10533.EXC | 11529937..unknown function, exon 1                       | orf19.1255              | 10533 | IPF10533   | C-compound and carbohydrate metabolism                               | TRANSCRIPTION SUBCELLULAR LOCALISATION                                   |
| CA3455 | 1.1 | 1.1 | 1.0 | 1.0 | 1.1 | 1.0 | IPF10533.EXC | 11532466..unknown function, exon 2                       | orf19.1256              | 19641 | IPF10533.ε | No significant S.c. match                                            |                                                                          |
| CA3456 | 1.0 | 1.2 | 1.0 | 1.0 | 1.1 | 1.0 | IPF19986     | complemer unknown function                               | orf19.1259              | 19986 | IPF19986   | SUBCELLULAR LOCALISATION                                             | molecular_function unknown                                               |
| CA3457 | 1.0 | 1.0 | 1.0 | 1.0 | 1.0 | 1.0 | IPF8521      | complemer unknown function                               | orf19.1260              | 8521  | IPF8521    | TRANSCRIPTION                                                        | ""PROTEIN FATE [folding modification destination]                        |
| CA3459 | 1.1 | 1.0 | 1.1 | 1.2 | 1.1 | 1.0 | CGT1.3F      | 11544397..mRNA capping enzym                             | CGT1 [Canorf19.1261     | 8518  | CaCGT1.3   | TRANSCRIPTION SUBCELLULAR LOCALISATION                               | RNA binding                                                              |
| CA3460 | 1.0 | 1.0 | 1.0 | 1.0 | 1.0 | 0.9 | CFL1         | complemer ferric reductase                               | ferric reductorf19.1263 | 8516  | CaCFL1     | REGULATION OF/INTERACTION WITH CELLULAR ENVIRONMENT                  | SUBCELLULAR LOCALISATION                                                 |
| CA3461 | 0.9 | 1.0 | 1.0 | 1.1 | 1.0 | 1.2 | CFL2         | complemer ferric reductase (by homology)                 | orf19.1264              | 8512  | CaCFL2     | REGULATION OF/INTERACTION WITH CELLULAR ENVIRONMENT                  | Other virulence attributes                                               |
| CA3462 | 0.9 | 1.0 | 1.0 | 1.0 | 0.9 | 1.1 | IPF14959     | 11556303..similar to Saccharomyces cerevisi              | orf19.1265              | 14959 | IPF14959   | CELLULAR TRANSPORT AND TRANSPORT MECHANISMS SUBCELL                  | molecular_function unknown                                               |
| CA3463 | 0.9 | 0.9 | 1.0 | 1.0 | 1.0 | 1.0 | ALG8         | complemer glucosyltransferase (by homology)              | orf19.1659              | 12530 | CaALG8     | C-compound and carbohydrate metabolism                               | ""PROTEIN FATE [folding mtransferase activity                            |
| CA3464 | 1.0 | 1.0 | 1.0 | 1.0 | 1.0 | 1.1 | DBP5         | 11565513..RNA helicase (by homology)                     | orf19.1661              | 12528 | CaDBP5     | CLASSIFICATION NOT YET CLEAR-CUT                                     | RNA binding,helicase activity                                            |
| CA3465 | 1.1 | 1.0 | 1.0 | 1.0 | 0.9 | 1.0 | MRP1.3F      | complemer Mitochondrial ribosomal protein of the small s |                         | 18330 | CaMRP1.3   | PROTEIN SYNTHESIS SUBCELLULAR LOCALISATION                           | structural molecule activity                                             |
| CA3466 | 0.9 | 1.0 | 1.0 | 1.1 | 1.1 | 1.0 | MRP1.5F      | complemer mitochondrial ribosomal protein of             | orf19.1662              | 12526 | CaMRP1.5   | PROTEIN SYNTHESIS SUBCELLULAR LOCALISATION                           |                                                                          |
| CA3467 | 1.0 | 1.0 | 1.1 | 1.0 | 1.0 | 1.0 | MNT2         | 11570759..Alpha-1,2-mannosyltra putative m               | orf19.1663              | 6319  | CaMNT2     | C-compound and carbohydrate metabolism                               | ""PROTEIN FATE [folding mtransferase activity                            |
| CA3468 | 0.9 | 1.1 | 1.0 | 0.9 | 1.1 | 1.0 | IPF6318      | complemer beta-glucosidase (by homology)                 | orf19.1664              | 6318  | IPF6318    | No significant S.c. match                                            |                                                                          |
| CA3469 | 1.1 | 1.2 | 1.0 | 1.0 | 1.2 | 1.0 | MNT1         | 11577042..Mannosyltransferase i putative m               | orf19.1665              | 6315  | CaMNT1     | C-compound and carbohydrate metabolism                               | ""PROTEIN FATE [folding mtransferase activity                            |
| CA3470 | 1.0 | 1.0 | 1.0 | 1.0 | 1.0 | 1.0 | IPF6310      | 11580716..unknown function                               | orf19.1666              | 6310  | IPF6310    | No significant S.c. match                                            |                                                                          |
| CA3471 | 1.0 | 1.0 | 1.0 | 1.0 | 1.0 | 1.0 | IPF6308      | 11582920..unknown function                               | orf19.1667              | 6308  | IPF6308    | UNCLASSIFIED PROTEINS                                                |                                                                          |
| CA3472 | 1.0 | 1.0 | 1.0 | 0.9 | 1.1 | 1.0 | IPF6305.EXO  | 11586885..unknown function, exon 2                       |                         | 6306  | IPF6305.ε  | UNCLASSIFIED PROTEINS                                                | molecular_function unknown                                               |
| CA3473 | 1.0 | 0.9 | 1.0 | 0.9 | 1.0 | 1.0 | IPF6305.EXO  | 11587374..unknown function, exon 1                       | orf19.1668              | 6305  | IPF6305.ε  | UNCLASSIFIED PROTEINS                                                | molecular_function unknown                                               |
| CA3474 | 1.1 | 1.0 | 1.0 | 1.0 | 1.0 | 1.0 | AFG3         | complemer Member of the Sec18p, Pas1p, Cco               | orf19.1669              | 8090  | CaAFG3     | PROTEIN FATE [folding modification destination]                      | ""SUBCELLULAR LOC peptidase activity                                     |
| CA3475 | 1.0 | 1.0 | 1.1 | 1.0 | 1.0 | 1.0 | BRO1         | 11592591..required for normal response to n              | orf19.1670              | 8087  | CaBRO1     | CELL RESCUE DEFENSE AND VIRULENCE                                    | ""REGULATION OF/INTE transporter activity                                |
| CA3476 | 1.0 | 1.0 | 1.1 | 1.1 | 0.9 | 1.1 | NUP2.3EOC    | 11599995..nucleoporine involved in nuclear               | orf19.3583              | 3232  | CaNUP2.3   | CELLULAR TRANSPORT AND TRANSPORT MECHANISMS SUBCELL                  | structural molecule activity                                             |
| CA3477 | 0.9 | 1.0 | 1.0 | 1.1 | 1.0 | 1.0 | IPF3229      | complemer unknown function                               | orf19.3582              | 3229  | IPF3229    | UNCLASSIFIED PROTEINS                                                | transferase activity                                                     |
| CA3478 | 1.0 | 0.9 | 1.0 | 1.0 | 1.0 | 1.0 | IPF3227      | 11602346..similar to Saccharomyces cerevisi              | orf19.3581              | 3227  | IPF3227    | CELL CYCLE AND DNA PROCESSING                                        | ""PROTEIN FATE [folding modimolecular_function unknown                   |
| CA3479 | 1.0 | 1.1 | 0.9 | 1.0 | 1.0 | 1.1 | ATP4         | complemer F1F0-ATPase complex, F0 subuni                 | orf19.3579              | 3225  | CaATP4     | ENERGY CELLULAR TRANSPORT AND TRANSPORT MECHANISMS                   | structural molecule activity                                             |
| CA3480 | 0.9 | 0.9 | 1.0 | 1.0 | 1.0 | 1.1 | IPF3224      | complemer unknown function                               | orf19.3578              | 3224  | IPF3224    | No significant S.c. match                                            |                                                                          |
| CA3481 | 1.0 | 0.9 | 1.0 | 1.0 | 1.0 | 1.0 | IPF3223      | 11605324..unknown function                               |                         | 3223  | IPF3223    | No significant S.c. match                                            |                                                                          |
| CA3482 | 1.0 | 0.9 | 0.9 | 1.0 | 0.9 | 1.0 | COQ5         | complemer C-methyltransferase (by homology               | orf19.3577              | 3222  | CaCOQ5     | Metabolism of vitamins cofactors and prosthetic groups               | ""SUBCELLULAR Ltransferase activity                                      |
| CA3483 | 1.0 | 1.0 | 4.2 | 3.4 | 1.6 | 2.1 | CDC19        | complemer pyruvate kinase (by homology)                  | orf19.3575              | 19988 | CaCDC19    | C-compound and carbohydrate metabolism                               | ENERGY SUBCELLULAR Ltransferase activity                                 |
| CA3484 | 1.0 | 0.9 | 1.0 | 1.0 | 1.1 | 1.0 | IPF3214      | 11610094..HSP-mitochondrial chaperone (by                | orf19.3574              | 3214  | IPF3214    | PROTEIN FATE [folding modification destination]                      | ""CELL RESCUE DE molecular_function unknown                              |
| CA3485 | 1.0 | 1.0 | 1.1 | 1.0 | 1.0 | 1.0 | IPF3213      | complemer similar to Saccharomyces cerevisi              | orf19.3573              | 3213  | IPF3213    | PROTEIN FATE [folding modification destination]                      | ""SUBCELLULAR LOC hydrolyase activity                                    |
| CA3486 | 0.8 | 0.9 | 1.0 | 1.1 | 0.9 | 1.0 | IPF3206      | complemer unknown function                               | orf19.3572              | 3206  | IPF3206    | No significant S.c. match                                            |                                                                          |
| CA3487 | 1.1 | 1.1 | 1.0 | 0.9 | 1.0 | 1.0 | IPF3203      | complemer unknown function                               | orf19.3569              | 3203  | IPF3203    | UNCLASSIFIED PROTEINS                                                | molecular_function unknown                                               |
| CA3488 | 1.0 | 1.0 | 1.0 | 1.1 | 1.1 | 1.0 | IPF3198      | 11623067..unknown function                               | orf19.3568              | 3198  | IPF3198    | UNCLASSIFIED PROTEINS                                                | molecular_function unknown                                               |
| CA3489 | 1.0 | 1.0 | 1.0 | 0.9 | 1.0 | 1.0 | IPF3195      | 11625182..unknown function                               | orf19.3567              | 3195  | IPF3195    | Metabolism of vitamins cofactors and prosthetic groups               |                                                                          |
| CA3490 | 1.0 | 1.0 | 1.1 | 1.0 | 1.0 | 1.0 | IPF3192      | 11626857..unknown function                               | orf19.3565              | 3192  | IPF3192    | UNCLASSIFIED PROTEINS                                                |                                                                          |

|        |     |     |     |     |     |     |          |                                                            |                     |       |           |                                                                                     |                                 |
|--------|-----|-----|-----|-----|-----|-----|----------|------------------------------------------------------------|---------------------|-------|-----------|-------------------------------------------------------------------------------------|---------------------------------|
| CA3491 | 1.0 | 1.1 | 1.1 | 1.0 | 0.9 | 1.0 | RPC40    | 11628235..RNA polymerase (by homology)                     | orf19.3564          | 3191  | CaRPC40   | TRANSCRIPTION SUBCELLULAR LOCALISATION                                              | nucleotidyltransferase activity |
| CA3492 | 1.1 | 1.0 | 0.9 | 1.0 | 1.0 | 1.1 | IPF3189  | 11630027..unknown function                                 | orf19.3563          | 3189  | IPF3189   | No significant S.c. match                                                           |                                 |
| CA3493 | 1.0 | 1.1 | 1.1 | 1.1 | 1.1 | 1.0 | CDC7     | complemer serine/threonine protein kinase (by orf19.3561   |                     | 19635 | CaCDC7    | CELL CYCLE AND DNA PROCESSING SUBCELLULAR LOCALISATION                              | protein kinase activity         |
| CA3494 | 1.0 | 0.9 | 1.0 | 0.9 | 1.0 | 1.1 | RPB5     | 11634820..DNA-directed RNA polymerase I, forf19.6340       |                     | 17067 | CaRPB5    | TRANSCRIPTION SUBCELLULAR LOCALISATION                                              | nucleotidyltransferase activity |
| CA3495 | 1.0 | 0.9 | 1.0 | 1.2 | 1.0 | 0.8 | RIB7     | complemer HTP reductase (By homology)                      | orf19.6341          | 17066 | CaRIB7    | Metabolism of vitamins cofactors and prosthetic groups                              | hydrolase activity              |
| CA3496 | 0.9 | 1.0 | 1.0 | 0.9 | 1.0 | 1.0 | IPF17064 | complemer unknown function                                 | orf19.6342          | 17064 | IPF17064  | No significant S.c. match                                                           |                                 |
| CA3497 | 1.0 | 1.0 | 0.9 | 0.9 | 0.9 | 1.0 | FEN11    | 11638516..Fatty acid elongase required for s,orf19.6343    |                     | 18329 | CaFEN11   | C-compound and carbohydrate metabolism ""Lipid fatty-acid and isopren               | transferase activity            |
| CA3498 | 1.0 | 1.0 | 0.9 | 1.0 | 1.0 | 1.0 | RBK1     | complemer Ribokinase (by homology)                         | orf19.6344          | 15253 | CaRBK1    | C-compound and carbohydrate metabolism                                              | transferase activity            |
| CA3499 | 1.1 | 1.0 | 1.0 | 1.0 | 1.1 | 1.1 | RPG1     | complemer Translation initiation factor eIF3 (b orf19.6345 |                     | 15252 | CaRPG1    | CELL CYCLE AND DNA PROCESSING PROTEIN SYNTHESIS SUBCE                               | translation regulator activity  |
| CA3500 | 1.0 | 0.9 | 1.0 | 1.1 | 1.0 | 1.0 | IPF14487 | complemer unknown function                                 | unnamed porf19.6346 | 14487 | IPF14487  | UNCLASSIFIED PROTEINS                                                               | molecular_function unknown      |
| CA3501 | 1.0 | 0.9 | 1.0 | 0.9 | 1.0 | 1.0 | CDC40    | 11645515..cell division control protein (by hororf19.6347  |                     | 14486 | CaCDC40   | CELL CYCLE AND DNA PROCESSING SUBCELLULAR LOCALISATION                              | RNA binding                     |
| CA3502 | 0.9 | 1.0 | 1.0 | 1.1 | 1.1 | 1.1 | IPF14485 | complemer unknown function                                 | orf19.6348          | 14485 | IPF14485  | No significant S.c. match                                                           |                                 |
| CA3503 | 1.0 | 1.0 | 1.0 | 1.0 | 1.0 | 1.0 | IPF15890 | complemer cytoskeletal binding protein (by ho orf19.6349   |                     | 15890 | IPF15890  | CELLULAR TRANSPORT AND TRANSPORT MECHANISMS CELL FATE SUBCELLULAR LOCALISATION      |                                 |
| CA3504 | 0.9 | 0.9 | 1.0 | 1.1 | 1.0 | 1.1 | IPF11369 | 11653630..unknown function                                 | orf19.6350          | 11369 | IPF11369  | No significant S.c. match                                                           |                                 |
| CA3505 | 1.0 | 1.0 | 1.0 | 1.0 | 1.0 | 0.9 | IPF11372 | 11654824..unknown function                                 | orf19.6351          | 11372 | IPF11372  | No significant S.c. match                                                           |                                 |
| CA3506 | 1.0 | 1.0 | 0.9 | 1.0 | 1.0 | 1.0 | IFA5     | complemer unknown function                                 | orf19.6353          | 11374 | CaIFA5    | Nucleotide metabolism CELL CYCLE AND DNA PROCESSING CELLULAR COMMUNICATION/SIGNAL T |                                 |
| CA3507 | 0.9 | 1.0 | 0.9 | 1.0 | 1.1 | 1.0 | IPF11375 | 11659625..unknown function                                 | orf19.6354          | 11375 | IPF11375  | TRANSCRIPTION SUBCELLULAR LOCALISATION                                              |                                 |
| CA3508 | 1.0 | 1.0 | 1.0 | 1.0 | 0.9 | 1.0 | RSA2     | complemer Involved in ribosome biogenesis (torf19.6355     |                     | 11376 | CaRSA2    | TRANSCRIPTION CONTROL OF CELLULAR ORGANIZATION                                      | molecular_function unknown      |
| CA3509 | 1.0 | 1.0 | 1.0 | 1.1 | 1.0 | 1.0 | PRP6     | 11662111..snRNP(U4/U6)-associated splicing orf19.6356      |                     | 19783 | CaPRP6    | TRANSCRIPTION SUBCELLULAR LOCALISATION                                              | RNA binding                     |
| CA3510 | 1.0 | 1.1 | 1.0 | 0.9 | 0.9 | 0.9 | MAD1     | complemer coiled-coil protein involved in the sorf19.6357  |                     | 11251 | CaMAD1    | CELL CYCLE AND DNA PROCESSING SUBCELLULAR LOCALISATION                              | molecular_function unknown      |
| CA3511 | 1.1 | 1.0 | 1.0 | 1.1 | 1.0 | 1.0 | MMS2     | 11667629..ubiquitin-conjugating enzyme (by torf19.6358     |                     | 11248 | CaMMS2    | CELL CYCLE AND DNA PROCESSING                                                       |                                 |
| CA3512 | 0.9 | 1.0 | 1.0 | 0.9 | 1.1 | 0.9 | IPF11247 | complemer unknown function                                 | orf19.6359          | 11247 | IPF11247  | PROTEIN FATE [folding modification destination] ""CELLULAR TRANSP                   | molecular_function unknown      |
| CA3513 | 1.0 | 1.0 | 0.9 | 0.9 | 1.0 | 1.0 | IPF11246 | 11668915..unknown function                                 | orf19.6360          | 11246 | IPF11246  | No significant S.c. match                                                           |                                 |
| CA3514 | 1.1 | 1.0 | 1.1 | 1.0 | 1.1 | 1.0 | IPF11245 | complemer similar to Saccharomyces cerevisi orf19.6362     |                     | 11245 | IPF11245  | REGULATION OF/INTERACTION WITH CELLULAR ENVIRONMENT C                               | protein binding                 |
| CA3515 | 1.0 | 0.9 | 1.0 | 1.0 | 0.9 | 1.0 | MRPL15   | complemer mitochondrial ribosomal protein of orf19.6363    |                     | 11656 | CaMRPL15  | PROTEIN SYNTHESIS SUBCELLULAR LOCALISATION                                          | structural molecule activity    |
| CA3517 | 1.0 | 0.9 | 1.0 | 1.0 | 0.9 | 1.0 | IFA22    | 11677479..Unknown function                                 | orf19.1002          | 15371 | CaIFA22   | CELL CYCLE AND DNA PROCESSING SUBCELLULAR LOCALISATION                              |                                 |
| CA3518 | 1.0 | 1.1 | 1.0 | 0.9 | 1.0 | 1.0 | AMYG2    | 11686305..glucoamylase                                     | orf19.8614          | 6791  | CaAMYG2   | C-compound and carbohydrate metabolism ENERGY SUBCELLULAR LOCALISATION              |                                 |
| CA3519 | 1.0 | 0.9 | 0.9 | 1.0 | 1.0 | 0.9 | IPF6787  | 11689544..unknown function                                 | orf19.8613          | 6787  | IPF6787   | No significant S.c. match                                                           |                                 |
| CA3520 | 1.0 | 1.0 | 1.0 | 0.9 | 1.1 | 1.0 | IPF6785  | complemer unknown function                                 | orf19.997           | 6785  | IPF6785   | No significant S.c. match                                                           |                                 |
| CA3521 | 1.0 | 1.0 | 0.9 | 1.0 | 1.0 | 0.9 | IFA15    | complemer unknown function                                 | orf19.996           | 6784  | CaIFA15   | Nucleotide metabolism CELL CYCLE AND DNA PROCESSING CELLULAR COMMUNICATION/SIGNAL T |                                 |
| CA3522 | 1.0 | 1.0 | 1.1 | 0.9 | 1.0 | 0.9 | IPF20134 | complemer unknown function                                 | orf19.994           | 20134 | IPF20134  | No significant S.c. match                                                           |                                 |
| CA3523 | 1.0 | 1.0 | 1.1 | 1.1 | 1.0 | 1.0 | IPF20135 | complemer unknown function                                 | orf19.993           | 20135 | IPF20135  | TRANSCRIPTION SUBCELLULAR LOCALISATION                                              |                                 |
| CA3524 | 1.0 | 1.0 | 1.0 | 1.0 | 1.1 | 1.0 | LKH1.3   | complemer PROBABLE LEUKOTRIENE A-4 torf19.992              |                     | 6778  | CaLKH1.3  | Lipid fatty-acid and isoprenoid metabolism                                          | peptidase activity              |
| CA3525 | 1.1 | 1.1 | 1.1 | 1.0 | 1.0 | 1.1 | DJP1     | complemer DnaJ-like protein involved in perox orf19.8606   |                     | 6776  | CaDJP1    | PROTEIN FATE [folding modification destination] ""CELLULAR TRANSP                   | chaperone activity              |
| CA3526 | 1.1 | 1.0 | 1.0 | 1.0 | 1.0 | 0.9 | MRPS5    | complemer Probable ribosomal protein S5, mi orf19.8604     |                     | 9936  | CaMRPS5   | PROTEIN SYNTHESIS SUBCELLULAR LOCALISATION                                          | structural molecule activity    |
| CA3527 | 1.0 | 1.1 | 1.0 | 1.1 | 1.0 | 0.9 | IPF9934  | complemer unknown function                                 | orf19.8603          | 9934  | IPF9934   | UNCLASSIFIED PROTEINS                                                               | molecular_function unknown      |
| CA3528 | 1.1 | 1.0 | 1.1 | 1.0 | 1.1 | 1.0 | GLY1     | complemer L-threonine aldolase                             | orf19.8601          | 9931  | CaGLY1    | Amino acid metabolism                                                               |                                 |
| CA3529 | 1.0 | 1.0 | 1.0 | 1.0 | 1.0 | 1.0 | IPF9929  | complemer unknown function                                 | orf19.8600          | 9929  | IPF9929   | UNCLASSIFIED PROTEINS                                                               | molecular_function unknown      |
| CA3530 | 1.0 | 1.0 | 0.9 | 0.9 | 1.0 | 1.0 | IPF9926  | complemer alkaline phosphatase (by homolog orf19.984       |                     | 9926  | IPF9926   | Phosphate metabolism SUBCELLULAR LOCALISATION                                       |                                 |
| CA3532 | 1.0 | 1.0 | 1.0 | 1.0 | 1.0 | 1.1 | IPF13448 | complemer similar to Saccharomyces Ptp1 p orf19.6365       |                     | 13448 | IPF13448  | CELLULAR COMMUNICATION/SIGNAL TRANSDUCTION MECHANISM                                | protein phosphatase activity    |
| CA3533 | 0.9 | 1.1 | 1.0 | 1.0 | 1.1 | 1.1 | IPF13450 | 11719589..unknown function                                 | orf19.6366          | 13450 | IPF13450  | No significant S.c. match                                                           |                                 |
| CA3534 | 0.9 | 1.0 | 1.1 | 1.0 | 0.9 | 0.9 | SSB1     | 11720670..heat shock protein 70                            | orf19.6367          | 13454 | CaSSB1    | PROTEIN SYNTHESIS SUBCELLULAR LOCALISATION                                          | chaperone activity              |
| CA3535 | 1.0 | 1.0 | 1.0 | 1.1 | 1.1 | 1.1 | IPF13458 | complemer unknown function                                 | orf19.6369          | 13458 | IPF13458  | UNCLASSIFIED PROTEINS                                                               | protein kinase activity         |
| CA3536 | 1.1 | 1.0 | 1.0 | 1.0 | 1.1 | 1.0 | IPF5414  | 11724185..unknown function                                 | orf19.6371          | 5414  | IPF5414   | No significant S.c. match                                                           |                                 |
| CA3537 | 1.0 | 1.0 | 0.9 | 1.0 | 1.0 | 1.1 | PSU1     | complemer suppressor of petit mutations by horf19.6373     |                     | 5418  | CaPSU1    | ENERGY                                                                              | hydrolase activity              |
| CA3538 | 0.9 | 0.9 | 1.1 | 1.0 | 0.9 | 1.0 | ATP10    | 11728576..F1F0 ATPase complex assembly, forf19.6374        |                     | 5420  | CaATP10   | PROTEIN FATE [folding modification destination] ""SUBCELLULAR LOC                   | molecular_function unknown      |
| CA3539 | 1.1 | 1.0 | 0.9 | 0.9 | 1.0 | 1.2 | RPS22    | 11730432..ribosomal protein by homology                    | orf19.6375          | 5422  | CaRPS22   | PROTEIN SYNTHESIS SUBCELLULAR LOCALISATION                                          | structural molecule activity    |
| CA3540 | 0.9 | 0.9 | 1.0 | 1.0 | 0.9 | 1.1 | PTC5     | 11731874..Type 2C Protein Phosphatase by torf19.6376       |                     | 5424  | CaPTC5    | PROTEIN FATE [folding modification destination]                                     | hydrolase activity              |
| CA3541 | 1.2 | 1.0 | 1.1 | 1.1 | 0.9 | 1.1 | IPF5425  | complemer similar to Saccharomyces cerevisi orf19.6377     |                     | 5425  | IPF5425   | PROTEIN FATE [folding modification destination]                                     | transferase activity            |
| CA3542 | 0.9 | 1.0 | 1.1 | 1.0 | 1.0 | 1.0 | IPF5426  | complemer putative methyltransferase (by hororf19.6378     |                     | 5426  | IPF5426   | UNCLASSIFIED PROTEINS                                                               | molecular_function unknown      |
| CA3543 | 1.0 | 0.9 | 1.0 | 1.0 | 1.0 | 1.0 | IPF5428  | 11736291..unknown function                                 | orf19.6379          | 5428  | IPF5428   | No significant S.c. match                                                           |                                 |
| CA3544 | 1.0 | 1.0 | 1.0 | 1.0 | 1.0 | 1.0 | BPT1.3F  | complemer membrane transporter of the ATP- orf19.6382      |                     | 12646 | CaBPT1.3f | CELL RESCUE DEFENSE AND VIRULENCE ""TRANSPORT FACILITATION                          |                                 |
| CA3545 | 1.0 | 1.1 | 1.0 | 1.0 | 1.1 | 1.0 | BPT1.5F  | complemer membrane transporter of the ATP- orf19.6383      |                     | 12648 | CaBPT1.5f | CELL RESCUE DEFENSE AND VIRULENCE ""TRANSPORT FACILITATION                          |                                 |
| CA3546 | 1.5 | 2.9 | 0.9 | 0.9 | 1.0 | 1.1 | ACO1     | complemer aconitate hydratase (by homology; orf19.6385     |                     | 12652 | CaACO1    | C-compound and carbohydrate metabolism ENERGY SUBCELLULAR L                         | lyase activity                  |
| CA3547 | 1.0 | 0.8 | 1.0 | 1.1 | 1.0 | 1.1 | ADE13    | complemer adenylosuccinate lyase (by homok orf19.3870      |                     | 12183 | CaADE13   | Nucleotide metabolism Purine ribonucleotide metabolism                              | lyase activity                  |
| CA3548 | 1.0 | 1.0 | 1.0 | 1.0 | 1.0 | 1.0 | IPF12179 | 11754067..unknown function                                 | orf19.3872          | 12179 | IPF12179  | UNCLASSIFIED PROTEINS                                                               | molecular_function unknown      |
| CA3549 | 1.0 | 1.0 | 1.0 | 1.0 | 1.1 | 1.0 | ARC40    | 11755199..subunit of the Arp2/3 complex inv orf19.3873     |                     | 12178 | CaARC40   | CELL FATE SUBCELLULAR LOCALISATION                                                  | structural molecule activity    |
| CA3550 | 1.1 | 1.0 | 1.0 | 1.0 | 0.9 | 0.9 | IPF13228 | 11758649..unknown function                                 | orf19.3874          | 13228 | IPF13228  | No significant S.c. match                                                           |                                 |
| CA3551 | 1.0 | 1.0 | 0.9 | 1.1 | 0.9 | 0.9 | IPF13229 | complemer unknown function                                 | orf19.3876          | 13229 | IPF13229  | UNCLASSIFIED PROTEINS                                                               | molecular_function unknown      |
| CA3552 | 1.0 | 0.9 | 0.9 | 1.0 | 1.0 | 1.0 | IPF13231 | 11763102..unknown function                                 | orf19.3877          | 13231 | IPF13231  | No significant S.c. match                                                           |                                 |
| CA3553 | 0.9 | 1.1 | 0.9 | 1.0 | 1.0 | 1.0 | IFA16.5  | 11764065..unknown function, 5-prime end                    | orf19.3878          | 13232 | CaIFA16.5 | No significant S.c. match                                                           |                                 |
| CA3554 | 1.0 | 1.0 | 1.0 | 1.0 | 0.9 | 0.9 | IPF7770  | complemer unknown function                                 | orf19.3881          | 7770  | IPF7770   | UNCLASSIFIED PROTEINS                                                               | molecular_function unknown      |
| CA3555 | 1.0 | 0.9 | 0.9 | 1.0 | 1.0 | 1.0 | IPF7766  | complemer unknown function                                 | orf19.3884          | 7766  | IPF7766   | CELLULAR TRANSPORT AND TRANSPORT MECHANISMS                                         |                                 |
| CA3556 | 1.0 | 1.0 | 1.1 | 0.9 | 1.0 | 0.9 | IPF7764  | 11771032..unknown function                                 | orf19.3885          | 7764  | IPF7764   | No significant S.c. match                                                           |                                 |
| CA3557 | 1.0 | 1.0 | 1.0 | 1.0 | 0.9 | 1.0 | IPF7763  | complemer unknown function                                 | orf19.3886          | 7763  | IPF7763   | CELL CYCLE AND DNA PROCESSING SUBCELLULAR LOCALISATION                              |                                 |
| CA3558 | 1.0 | 1.0 | 1.1 | 1.0 | 1.0 | 1.0 | IPF7760  | complemer unknown function                                 | orf19.3887          | 7760  | IPF7760   | No significant S.c. match                                                           |                                 |
| CA3559 | 0.9 | 0.9 | 1.7 | 2.0 | 1.4 | 1.5 | PGI1     | complemer Glucose-6-phosphate isomerase                    | orf19.3888          | 7759  | CaPGI1    | C-compound and carbohydrate metabolism ENERGY SUBCELLULAR L                         | isomerase activity              |
| CA3560 | 0.9 | 1.0 | 1.1 | 1.3 | 1.2 | 1.1 | CZF1     | 11792323..canal zinc finger protein                        | orf19.3127          | 10612 | CaCZF1    | No significant S.c. match                                                           |                                 |
| CA3561 | 1.0 | 0.9 | 1.3 | 1.2 | 1.1 | 1.0 | SLY1     | 11794297..hydrophilic suppressor of YPT1 an orf19.3128     |                     | 10610 | CaSLY1    | CELLULAR TRANSPORT AND TRANSPORT MECHANISMS SUBCELL                                 | protein binding                 |
| CA3562 | 1.0 | 1.0 | 0.9 | 1.0 | 1.1 | 1.0 | IPF7823  | complemer similar to Saccharomyces cerevisi orf19.3129     |                     | 7823  | IPF7823   | CELL CYCLE AND DNA PROCESSING TRANSCRIPTION SUBCELLUL                               | hydrolase activity              |
| CA3563 | 1.0 | 1.1 | 1.0 | 1.0 | 1.0 | 1.0 | IPF7819  | complemer unknown function                                 | orf19.3130          | 7819  | IPF7819   | UNCLASSIFIED PROTEINS                                                               | molecular_function unknown      |
| CA3564 | 1.0 | 1.0 | 1.0 | 1.1 | 1.0 | 1.0 | IPF7817  | 11799576..putative NADH-dependent flavin o orf19.3131      |                     | 7817  | IPF7817   | ENERGY                                                                              |                                 |

|        |     |     |     |     |     |     |             |                                                             |            |       |             |                                                                                                                       |                                |
|--------|-----|-----|-----|-----|-----|-----|-------------|-------------------------------------------------------------|------------|-------|-------------|-----------------------------------------------------------------------------------------------------------------------|--------------------------------|
| CA3565 | 1.0 | 1.0 | 1.0 | 0.9 | 1.1 | 1.0 | MSC2        | complemer Probable membrane protein                         | orf19.3132 | 7815  | CaMSC2      | UNCLASSIFIED PROTEINS                                                                                                 | transporter activity           |
| CA3566 | 1.1 | 0.9 | 1.0 | 0.9 | 1.1 | 1.0 | GUT2        | complemer Glycerol-3-phosphate dehydrogen                   | orf19.3133 | 7812  | CaGUT2      | C-compound and carbohydrate metabolism                                                                                | oxidoreductase activity        |
| CA3567 | 1.0 | 1.0 | 1.0 | 1.0 | 1.0 | 1.0 | IPF7804.5F  | 11809479..unknown function, 5-prime end                     | orf19.3134 | 7804  | IPF7804.5f  | No significant S.c. match                                                                                             |                                |
| CA3568 | 1.0 | 1.0 | 1.0 | 1.0 | 0.9 | 1.0 | IPF7804.3F  | 11809962..unknown function, 3-prime end                     | orf19.3135 | 7802  | IPF7804.3f  | UNCLASSIFIED PROTEINS                                                                                                 | molecular_function unknown     |
| CA3569 | 1.1 | 1.1 | 1.0 | 1.0 | 1.0 | 1.0 | IPF3268     | 11812168..unknown function                                  | orf19.3136 | 3268  | IPF3268     | CELL CYCLE AND DNA PROCESSING                                                                                         |                                |
| CA3570 | 1.1 | 1.0 | 1.1 | 1.0 | 1.0 | 1.1 | NOP1        | complemer Fibrillarlin                                      | orf19.3138 | 3267  | CaNOP1      | TRANSCRIPTION SUBCELLULAR LOCALISATION                                                                                | transferase activity           |
| CA3571 | 0.9 | 1.0 | 1.0 | 0.9 | 0.9 | 0.9 | IPF3264     | complemer unknown function                                  | orf19.1065 | 3264  | IPF3264     | Lipid fatty-acid and isoprenoid metabolism                                                                            |                                |
| CA3572 | 0.9 | 1.0 | 1.0 | 1.0 | 1.0 | 1.0 | IPF18321    | complemer unknown function                                  |            | 18321 | IPF18321    | No significant S.c. match                                                                                             |                                |
| CA3573 | 0.9 | 0.9 | 1.0 | 1.0 | 1.0 | 1.0 | RFA2        | complemer DNA replication factor by homolog                 | orf19.2267 | 13308 | CaRFA2      | CELL CYCLE AND DNA PROCESSING SUBCELLULAR LOCALISATION                                                                | DNA binding                    |
| CA3574 | 1.0 | 1.0 | 1.1 | 1.0 | 1.0 | 0.9 | IPF19584    | 11822330..unknown function                                  | orf19.2266 | 19584 | IPF19584    | SUBCELLULAR LOCALISATION                                                                                              | protein binding                |
| CA3575 | 1.0 | 1.0 | 1.0 | 0.9 | 1.0 | 1.0 | IPF11108    | complemer unknown function                                  | orf19.2265 | 11108 | IPF11108    | CELL CYCLE AND DNA PROCESSING TRANSCRIPTION SUBCELLULAR LOCALISATION                                                  | molecular_function unknown     |
| CA3576 | 1.0 | 1.1 | 1.0 | 1.0 | 1.0 | 1.0 | IPF11107    | 11826725..probably stearyl-CoA desaturase                   | orf19.2264 | 11107 | IPF11107    | Lipid fatty-acid and isoprenoid metabolism                                                                            | "SUBCELLULAR LOCALISATION      |
| CA3577 | 1.1 | 1.0 | 0.9 | 0.9 | 1.0 | 1.0 | IPF11106    | 11828594..unknown function                                  | orf19.2263 | 11106 | IPF11106    | No significant S.c. match                                                                                             |                                |
| CA3578 | 1.0 | 1.0 | 1.1 | 1.0 | 1.0 | 0.9 | IPF11105    | complemer probable quinone oxidoreductase                   | orf19.2262 | 11105 | IPF11105    | CLASSIFICATION NOT YET CLEAR-CUT                                                                                      | molecular_function unknown     |
| CA3579 | 1.2 | 1.0 | 1.1 | 0.9 | 1.0 | 1.0 | HS49        | complemer spliceosome-associated essential                  | orf19.2261 | 11104 | CaHS49      | TRANSCRIPTION SUBCELLULAR LOCALISATION                                                                                | RNA binding                    |
| CA3580 | 0.9 | 1.0 | 1.0 | 1.0 | 1.0 | 1.0 | IPF16141    | complemer unknown function                                  | orf19.2260 | 16141 | IPF16141    | UNCLASSIFIED PROTEINS                                                                                                 |                                |
| CA3581 | 1.0 | 1.0 | 1.0 | 1.1 | 1.1 | 1.0 | IPF16143    | 11833107..unknown function                                  | orf19.2259 | 16143 | IPF16143    | No significant S.c. match                                                                                             |                                |
| CA3582 | 1.0 | 0.9 | 1.0 | 0.9 | 1.0 | 0.9 | IPF15466    | 11834150..unknown function                                  | orf19.2258 | 15466 | IPF15466    | No significant S.c. match                                                                                             |                                |
| CA3583 | 1.0 | 1.0 | 1.0 | 1.0 | 1.0 | 0.9 | IPF20137    | complemer unknown function                                  | orf19.2257 | 20137 | IPF20137    | UNCLASSIFIED PROTEINS                                                                                                 | molecular_function unknown     |
| CA3584 | 0.9 | 0.9 | 1.0 | 1.0 | 1.0 | 0.9 | IPF15468    | complemer unknown function                                  | orf19.2256 | 15468 | IPF15468    | UNCLASSIFIED PROTEINS                                                                                                 | molecular_function unknown     |
| CA3585 | 1.0 | 1.0 | 1.0 | 1.0 | 0.9 | 1.0 | IFT1        | complemer unknown function                                  | orf19.2253 | 16720 | CaIFT1      | No significant S.c. match                                                                                             |                                |
| CA3586 | 1.0 | 1.0 | 1.0 | 1.1 | 1.0 | 0.9 | IFT3        | complemer Unknown function                                  | orf19.2252 | 15939 | CaIFT3      | No significant S.c. match                                                                                             |                                |
| CA3587 | 1.0 | 1.0 | 1.0 | 1.1 | 1.0 | 0.9 | AAH1        | complemer adenosine deaminase (by homolog)                  | orf19.2251 | 10117 | CaAAH1      | Nucleotide metabolism Purine ribonucleotide metabolism                                                                | hydrolase activity             |
| CA3588 | 1.0 | 1.0 | 0.9 | 1.0 | 0.9 | 0.9 | SPE3        | complemer putrescine aminopropyltransferase                 | orf19.2250 | 10115 | CaSPE3      | Secondary metabolism CONTROL OF CELLULAR ORGANIZATION                                                                 | transferase activity           |
| CA3589 | 0.9 | 1.0 | 1.0 | 1.0 | 1.0 | 1.0 | IPF10113    | 11847040..unknown function                                  | orf19.2249 | 10113 | IPF10113    | UNCLASSIFIED PROTEINS                                                                                                 | molecular_function unknown     |
| CA3590 | 1.0 | 1.0 | 1.0 | 1.0 | 1.1 | 1.0 | ARE2        | 11849844..acyl-CoA sterol acyltransferase-lik               | orf19.2248 | 10110 | CaARE2      | Lipid fatty-acid and isoprenoid metabolism                                                                            | "CELL FATE                     |
| CA3591 | 0.9 | 1.0 | 1.0 | 1.0 | 1.0 | 1.0 | IFT2        | 11853104..unknown function                                  | orf19.2247 | 12902 | CaIFT2      | TRANSPORT FACILITATION                                                                                                | transferase activity           |
| CA3592 | 1.0 | 1.0 | 1.1 | 1.1 | 1.0 | 1.1 | IPF12900    | 11854883..unknown function                                  | orf19.2246 | 12900 | IPF12900    | UNCLASSIFIED PROTEINS                                                                                                 | molecular_function unknown     |
| CA3593 | 1.0 | 1.1 | 0.9 | 1.0 | 1.0 | 0.9 | YPT71       | complemer GTP-binding protein of the RAB fa                 | orf19.2245 | 12899 | CaYPT71     | CELLULAR TRANSPORT AND TRANSPORT MECHANISMS SUBCELLULAR LOCALISATION                                                  | hydrolase activity             |
| CA3594 | 1.1 | 1.0 | 1.0 | 1.0 | 1.0 | 1.0 | IPF6076.3   | complemer unknown function, 3-prime end                     | orf19.4922 | 6076  | IPF6076.3   | UNCLASSIFIED PROTEINS                                                                                                 | enzyme regulator activity      |
| CA3595 | 1.0 | 1.1 | 1.0 | 1.0 | 1.0 | 1.1 | IPF6079     | complemer putative permease (by homology)                   | orf19.4923 | 6079  | IPF6079     | C-compound and carbohydrate metabolism TRANSPORT FACILITATION                                                         |                                |
| CA3596 | 1.0 | 1.0 | 1.0 | 1.0 | 1.0 | 1.0 | IPF6085     | 11863395..unknown function                                  | orf19.4924 | 6085  | IPF6085     | No significant S.c. match                                                                                             |                                |
| CA3597 | 1.0 | 1.0 | 0.9 | 1.0 | 1.1 | 1.2 | BN11        | complemer regulator of budding (by homology)                | orf19.4927 | 6091  | CaBN11      | CELL CYCLE AND DNA PROCESSING CELL FATE SUBCELLULAR LOCALISATION                                                      | protein binding                |
| CA3598 | 1.0 | 0.8 | 1.0 | 1.0 | 1.0 | 1.1 | SEC2        | complemer GDP/GTP exchange factor (by homology)             | orf19.1239 | 6094  | CaSEC2      | CELLULAR TRANSPORT AND TRANSPORT MECHANISMS SUBCELLULAR LOCALISATION                                                  | enzyme regulator activity      |
| CA3599 | 1.0 | 1.0 | 1.1 | 1.1 | 1.0 | 1.0 | IPF19785    | 11879559..unknown function                                  | orf19.4929 | 19785 | IPF19785    | TRANSCRIPTION PROTEIN SYNTHESIS SUBCELLULAR LOCALISATION                                                              | translation regulator activity |
| CA3600 | 0.9 | 0.8 | 0.9 | 1.0 | 1.1 | 1.0 | SPC3        | complemer signal peptidase subunit (by homology)            | orf19.4930 | 15621 | CaSPC3      | PROTEIN FATE [folding modification destination] "SUBCELLULAR LOCALISATION                                             | peptidase activity             |
| CA3601 | 1.0 | 0.9 | 0.9 | 1.0 | 1.0 | 0.9 | IPF15618    | complemer cysteinyl-tRNA synthetase (by homology)           | orf19.4931 | 15618 | IPF15618    | PROTEIN SYNTHESIS                                                                                                     | ligase activity                |
| CA3602 | 1.0 | 0.9 | 0.9 | 1.0 | 0.9 | 1.1 | RPL14B.3    | 11887878..ribosomal protein L14B, 3-prime end (by homology) | orf19.4932 | 12937 | CaRPL14B    | PROTEIN SYNTHESIS SUBCELLULAR LOCALISATION                                                                            | RNA binding                    |
| CA3603 | 1.0 | 1.0 | 1.0 | 1.1 | 1.1 | 0.9 | MEF1        | complemer mitochondrial translation elongation factor       | orf19.4932 | 12940 | CaMEF1      | PROTEIN SYNTHESIS SUBCELLULAR LOCALISATION                                                                            | translation regulator activity |
| CA3604 | 1.0 | 0.9 | 1.1 | 1.0 | 1.0 | 1.0 | IPF12942    | complemer delta-12 fatty acid desaturase (by homology)      | orf19.4933 | 12942 | IPF12942    | No significant S.c. match                                                                                             |                                |
| CA3605 | 1.0 | 1.0 | 1.1 | 1.0 | 0.9 | 1.0 | IPF3865     | complemer unknown function                                  | orf19.22   | 3865  | IPF3865     | SUBCELLULAR LOCALISATION                                                                                              |                                |
| CA3606 | 0.9 | 1.0 | 1.0 | 1.1 | 1.0 | 1.1 | RTA3        | 11902679..Unknown function                                  | orf19.23   | 3859  | CaRTA3      | UNCLASSIFIED PROTEINS                                                                                                 |                                |
| CA3607 | 1.1 | 1.0 | 0.9 | 1.0 | 1.0 | 1.0 | RTA2        | 11905078..Unknown function                                  | orf19.24   | 3858  | CaRTA2      | UNCLASSIFIED PROTEINS                                                                                                 | transporter activity           |
| CA3608 | 0.9 | 0.9 | 1.1 | 1.1 | 1.0 | 1.1 | IPF3857     | 11906652..unknown function                                  | orf19.25   | 3857  | IPF3857     | UNCLASSIFIED PROTEINS                                                                                                 | transferase activity           |
| CA3609 | 1.0 | 1.0 | 0.9 | 0.9 | 0.9 | 1.0 | IPF3856     | 11907851..similar to Saccharomyces cerevisiae               | orf19.26   | 3856  | IPF3856     | PROTEIN FATE [folding modification destination]                                                                       | enzyme regulator activity      |
| CA3610 | 0.9 | 0.9 | 1.0 | 1.0 | 0.9 | 0.9 | IPF3854     | 11909848..unknown function                                  | orf19.27   | 3854  | IPF3854     | No significant S.c. match                                                                                             |                                |
| CA3611 | 1.0 | 1.0 | 0.9 | 0.9 | 1.0 | 1.0 | IPF3853     | complemer unknown function                                  | orf19.28   | 3853  | IPF3853     | Nucleotide metabolism CELLULAR TRANSPORT AND TRANSPORT MECHANISMS SUBCELLULAR LOCALISATION                            | transporter activity           |
| CA3612 | 0.9 | 1.0 | 1.0 | 0.9 | 1.0 | 1.0 | IPF3852     | 11912464..unknown function                                  | orf19.29   | 3852  | IPF3852     | CELL CYCLE AND DNA PROCESSING                                                                                         | molecular_function unknown     |
| CA3613 | 1.0 | 1.0 | 1.0 | 1.0 | 1.1 | 1.0 | SPF1        | complemer P-type ATPase                                     | orf19.30   | 3849  | CaSPF1      | REGULATION OF/INTERACTION WITH CELLULAR ENVIRONMENT TRANSCRIPTION                                                     | transporter activity           |
| CA3614 | 1.0 | 0.9 | 1.1 | 1.1 | 1.0 | 1.0 | IPF8878     | 11918837..unknown function                                  | orf19.31   | 8878  | IPF8878     | CELL RESCUE DEFENSE AND VIRULENCE "CELL FATE                                                                          |                                |
| CA3615 | 0.9 | 1.0 | 1.0 | 1.1 | 1.0 | 1.1 | GIT1        | complemer glycerophosphoinositol transporter                | orf19.34   | 8874  | CaGIT1      | Lipid fatty-acid and isoprenoid metabolism "SUBCELLULAR LOCALISATION                                                  | transporter activity           |
| CA3616 | 1.1 | 1.1 | 1.0 | 1.0 | 1.1 | 1.0 | ASN1        | 11927767..asparagine synthetase (by homology)               | orf19.199  | 19994 | CaASN1      | Amino acid metabolism SUBCELLULAR LOCALISATION                                                                        | ligase activity                |
| CA3617 | 1.0 | 1.0 | 1.0 | 0.9 | 1.1 | 1.0 | IPF9069     | 11929978..unknown function                                  | orf19.199  | 9069  | IPF9069     | ENERGY                                                                                                                |                                |
| CA3618 | 1.0 | 1.0 | 1.0 | 1.2 | 1.2 | 1.1 | THO1        | complemer suppressor of the hpr1 ts phenotype               | orf19.200  | 20138 | CaTHO1      | UNCLASSIFIED PROTEINS                                                                                                 | molecular_function unknown     |
| CA3619 | 1.0 | 1.0 | 1.0 | 1.1 | 1.0 | 1.0 | CDC47.5     | complemer cell division control protein, , 5-prime end      | orf19.202  | 9065  | CaCDC47     | CELL CYCLE AND DNA PROCESSING SUBCELLULAR LOCALISATION                                                                | DNA binding                    |
| CA3620 | 0.9 | 1.0 | 0.9 | 1.0 | 1.0 | 1.0 | IPF9063     | complemer similar to Saccharomyces cerevisiae               | orf19.203  | 9063  | IPF9063     | TRANSCRIPTION                                                                                                         | molecular_function unknown     |
| CA3621 | 0.9 | 0.9 | 0.9 | 0.9 | 0.9 | 1.0 | IPF8942     | 11940739..unknown function                                  | orf19.204  | 8942  | IPF8942     | No significant S.c. match                                                                                             |                                |
| CA3622 | 1.0 | 0.9 | 1.0 | 0.9 | 1.0 | 1.0 | IPF12022    | 11947135..extracellular alpha-1,4-glucan glucanase          | orf19.7836 | 12022 | IPF12022    | No significant S.c. match                                                                                             |                                |
| CA3623 | 1.0 | 1.1 | 1.0 | 1.1 | 1.1 | 1.0 | IPF15911    | 11952810..unknown function                                  | orf19.7838 | 15911 | IPF15911    | No significant S.c. match                                                                                             |                                |
| CA3625 | 1.0 | 1.0 | 0.9 | 1.1 | 1.0 | 1.0 | CYR1.3F     | complemer adenylate cyclase, 3-p adenylate cyclase          | orf19.1261 | 12339 | CaCYR1.3f   | Nucleotide metabolism CELL CYCLE AND DNA PROCESSING CELLULAR COMMUNICATION/SIGNAL TRANSDUCTION                        | ylase activity                 |
| CA3626 | 1.1 | 1.0 | 1.0 | 1.0 | 1.0 | 0.9 | CYR1.5F     | complemer adenylate cyclase, 5-prime end                    | orf19.1261 | 12336 | CaCYR1.5f   | Nucleotide metabolism CELL CYCLE AND DNA PROCESSING CELLULAR COMMUNICATION/SIGNAL TRANSDUCTION                        |                                |
| CA3627 | 1.0 | 1.0 | 1.0 | 1.0 | 1.0 | 1.1 | IPF18318    | 11965072..unknown function                                  | orf19.1261 | 18318 | IPF18318    | UNCLASSIFIED PROTEINS                                                                                                 | molecular_function unknown     |
| CA3628 | 0.9 | 0.9 | 1.0 | 1.0 | 1.0 | 1.0 | IPF18316.3F | complemer unknown function, 3-prime end                     | orf19.1261 | 18317 | IPF18316.3f | Nitrogen and sulphur metabolism                                                                                       |                                |
| CA3629 | 0.9 | 1.1 | 1.0 | 1.1 | 1.1 | 0.9 | IPF18316.5F | complemer unknown function, 5-prime end                     | orf19.1261 | 18316 | IPF18316.5f | No significant S.c. match                                                                                             |                                |
| CA3630 | 1.1 | 1.2 | 1.0 | 1.0 | 1.1 | 1.0 | IPF8129     | 11970757..unknown function                                  | orf19.1260 | 8129  | IPF8129     | No significant S.c. match                                                                                             |                                |
| CA3631 | 1.1 | 1.1 | 1.1 | 1.0 | 1.1 | 1.0 | TIM54       | 11972073..Translocase for the insertion of porphyrin        | orf19.1260 | 8130  | CaTIM54     | PROTEIN FATE [folding modification destination] "CELLULAR TRANSPORT AND TRANSPORT MECHANISMS SUBCELLULAR LOCALISATION | transporter activity           |
| CA3632 | 1.1 | 1.0 | 1.0 | 1.0 | 1.0 | 0.9 | DFR1        | complemer dihydrofolate reductase dihydrofolate reductase   | orf19.5142 | 8131  | CaDFR1      | Amino acid metabolism Nucleotide metabolism Purine ribonucleotide metabolism                                          | oxidoreductase activity        |
| CA3633 | 1.0 | 1.0 | 1.0 | 1.0 | 0.9 | 1.0 | IFA19       | 11974620..unknown function                                  | orf19.5141 | 8136  | CaIFA19     | UNCLASSIFIED PROTEINS                                                                                                 |                                |
| CA3634 | 1.1 | 1.0 | 1.0 | 1.0 | 1.0 | 1.0 | IFA25       | 11977577..unknown function                                  | orf19.5140 | 8138  | CaIFA25     | Nucleotide metabolism CELL CYCLE AND DNA PROCESSING CELLULAR COMMUNICATION/SIGNAL TRANSDUCTION                        |                                |
| CA3635 | 1.1 | 1.2 | 1.0 | 1.0 | 1.1 | 1.1 | IFA20       | 11980400..unknown function                                  | orf19.5139 | 8140  | CaIFA20     | Nucleotide metabolism CELL CYCLE AND DNA PROCESSING CELLULAR COMMUNICATION/SIGNAL TRANSDUCTION                        |                                |
| CA3636 | 1.0 | 0.9 | 1.1 | 1.0 | 1.0 | 1.0 | IFA21       | 11983197..unknown function                                  | orf19.1260 | 16529 | CaIFA21     | CELL RESCUE DEFENSE AND VIRULENCE                                                                                     |                                |
| CA3637 | 1.0 | 1.0 | 0.9 | 1.0 | 1.0 | 1.0 | IPF9255     | complemer unknown function                                  | orf19.5136 | 9255  | IPF9255     | UNCLASSIFIED PROTEINS                                                                                                 | molecular_function unknown     |

|        |     |     |     |     |     |     |              |                                                        |             |            |            |                                                                                        |                                                                         |                                     |
|--------|-----|-----|-----|-----|-----|-----|--------------|--------------------------------------------------------|-------------|------------|------------|----------------------------------------------------------------------------------------|-------------------------------------------------------------------------|-------------------------------------|
| CA3638 | 1.0 | 1.0 | 1.2 | 1.1 | 0.9 | 0.9 | IPF9252      | 11990889..unknown function                             | orf19.5134  | 9252       | IPF9252    | UNCLASSIFIED PROTEINS                                                                  |                                                                         |                                     |
| CA3639 | 0.9 | 0.9 | 0.9 | 1.0 | 1.1 | 1.1 | IPF9251      | complemer unknown function                             | orf19.5133  | 9251       | IPF9251    | Lipid fatty-acid and isoprenoid metabolism                                             | ""TRANSCRIPTION SUBCEL DNA binding                                      |                                     |
| CA3640 | 1.0 | 1.1 | 1.0 | 0.9 | 0.9 | 0.9 | VPS24        | 12002153..endosomal Vps protein complex                | orf19.2031  | 4120       | CaVPS24    | PROTEIN FATE [folding modification destination]                                        | ""CELLULAR TRANSP molecular_function unknown                            |                                     |
| CA3641 | 1.0 | 1.0 | 1.0 | 1.0 | 1.0 | 1.0 | IPF4122      | complemer unknown function                             | orf19.2032  | 4122       | IPF4122    | No significant S.c. match                                                              |                                                                         |                                     |
| CA3642 | 0.9 | 0.9 | 1.0 | 1.1 | 1.0 | 1.0 | IPF4123      | complemer unknown function                             | orf19.2033  | 4123       | IPF4123    | No significant S.c. match                                                              |                                                                         |                                     |
| CA3643 | 1.1 | 1.0 | 1.0 | 1.0 | 1.0 | 1.0 | IPF4124      | complemer unknown function                             | orf19.2034  | 4124       | IPF4124    | No significant S.c. match                                                              |                                                                         |                                     |
| CA3644 | 1.0 | 1.1 | 1.0 | 1.0 | 1.0 | 0.9 | IPF4126      | complemer unknown function                             | orf19.2035  | 4126       | IPF4126    | TRANSPORT FACILITATION                                                                 |                                                                         |                                     |
| CA3645 | 1.0 | 1.0 | 1.0 | 1.0 | 1.0 | 1.0 | IPF4127      | complemer putative dimeric dihydrodiol dehyd           | orf19.2036  | 4127       | IPF4127    | No significant S.c. match                                                              |                                                                         |                                     |
| CA3646 | 1.0 | 1.0 | 1.0 | 1.0 | 1.1 | 1.0 | IPF4128      | complemer unknown function                             | orf19.2037  | 4128       | IPF4128    | No significant S.c. match                                                              |                                                                         |                                     |
| CA3647 | 1.0 | 1.0 | 1.1 | 1.2 | 1.1 | 1.1 | IPF4129      | 12009894..unknown function                             | orf19.2038  | 4129       | IPF4129    | UNCLASSIFIED PROTEINS                                                                  |                                                                         |                                     |
| CA3648 | 1.0 | 1.0 | 0.9 | 1.0 | 1.1 | 1.1 | MSF1         | complemer phenylalanine--tRNA ligase                   | orf19.2039  | 4131       | CaMSF1     | PROTEIN SYNTHESIS                                                                      | ""PROTEIN FATE [folding modification destinaticligase activity          |                                     |
| CA3649 | 1.0 | 0.9 | 1.0 | 1.0 | 0.9 | 1.0 | IPF4132      | complemer unknown function                             | orf19.2040  | 4132       | IPF4132    | Lipid fatty-acid and isoprenoid metabolism                                             | ""ENERGY molecular_function unknown                                     |                                     |
| CA3650 | 0.9 | 1.0 | 1.0 | 1.0 | 1.0 | 0.9 | IPF4134      | 12014907..unknown function                             | orf19.2041  | 4134       | IPF4134    | CELL CYCLE AND DNA PROCESSING CONTROL OF CELLULAR OR(                                  | molecular_function unknown                                              |                                     |
| CA3651 | 0.9 | 1.0 | 0.9 | 0.9 | 0.9 | 0.9 | MSS1         | complemer Mitochondrial GTPase involved in             | orf19.2042  | 7447       | CaMSS1     | TRANSCRIPTION PROTEIN SYNTHESIS SUBCELLULAR LOCALISATION                               |                                                                         |                                     |
| CA3652 | 1.0 | 1.0 | 1.0 | 1.1 | 1.0 | 1.0 | NBP35        | 12018549..Nucleotide-binding protein (by hono          | orf19.2043  | 7450       | CaNBP35    | UNCLASSIFIED PROTEINS                                                                  |                                                                         |                                     |
| CA3653 | 1.1 | 1.1 | 1.1 | 1.0 | 1.0 | 1.0 | IPF7451      | 12019654..unknown function                             | orf19.2044  | 7451       | IPF7451    | No significant S.c. match                                                              |                                                                         |                                     |
| CA3654 | 1.0 | 1.0 | 1.0 | 1.0 | 1.0 | 1.0 | IPF7452      | 12021656..unknown function                             | orf19.2045  | 7452       | IPF7452    | UNCLASSIFIED PROTEINS                                                                  | molecular_function unknown                                              |                                     |
| CA3655 | 0.9 | 0.9 | 1.0 | 1.1 | 1.2 | 1.1 | POT13        | complemer Acetyl-CoA C-acyltransferase, per            | orf19.2046  | 7453       | CaPOT13    | Lipid fatty-acid and isoprenoid metabolism                                             | ""ENERGY SUBCELLULAR LOCALISATION                                       |                                     |
| CA3656 | 1.0 | 0.9 | 1.0 | 0.9 | 1.0 | 1.0 | IPF7456      | complemer unknown function                             | orf19.2047  | 7456       | IPF7456    | UNCLASSIFIED PROTEINS                                                                  | molecular_function unknown                                              |                                     |
| CA3657 | 0.9 | 0.9 | 1.0 | 1.0 | 1.0 | 0.9 | IPF7459      | complemer unknown function                             | orf19.2049  | 7459       | IPF7459    | No significant S.c. match                                                              |                                                                         |                                     |
| CA3658 | 1.0 | 0.9 | 1.1 | 1.0 | 1.0 | 1.0 | TGL1         | 12028548..Triacylglycerol lipase (by homolog           | orf19.2050  | 7463       | CaTGL1     | Lipid fatty-acid and isoprenoid metabolism                                             | hydrolase activity                                                      |                                     |
| CA3660 | 1.0 | 1.1 | 0.9 | 1.0 | 1.0 | 0.9 | IPF17794     | 12030737..unknown function                             |             | 17994      | IPF17794   | No significant S.c. match                                                              |                                                                         |                                     |
| CA3661 | 1.0 | 1.1 | 1.0 | 0.9 | 1.0 | 1.0 | IPF17991     | complemer unknown function                             | orf19.6465  | 17991      | IPF17991   | C-compound and carbohydrate metabolism SUBCELLULAR LOCALISATION                        |                                                                         |                                     |
| CA3662 | 1.0 | 1.0 | 1.0 | 1.0 | 0.9 | 0.9 | IPF17021     | 12037174..unknown function                             | orf19.6464  | 17021      | IPF17021   | Nucleotide metabolism                                                                  |                                                                         |                                     |
| CA3663 | 1.0 | 1.0 | 1.0 | 1.0 | 1.0 | 1.0 | IPF11432     | complemer unknown function                             | orf19.6463  | 11432      | IPF11432   | UNCLASSIFIED PROTEINS                                                                  | molecular_function unknown                                              |                                     |
| CA3664 | 1.1 | 1.1 | 1.0 | 1.0 | 1.1 | 1.0 | IPF11433.3F  | complemer unknown function, 3-prime end                | orf19.6462  | 11433      | IPF11433.3 | UNCLASSIFIED PROTEINS                                                                  | molecular_function unknown                                              |                                     |
| CA3666 | 1.1 | 1.0 | 0.9 | 1.0 | 1.0 | 1.0 | IPF11435     | complemer unknown function                             | orf19.6461  | 11435      | IPF11435   | ENERGY CONTROL OF CELLULAR ORGANIZATION                                                | SUBCELLULAR chaperone activity                                          |                                     |
| CA3667 | 1.0 | 1.0 | 1.0 | 1.0 | 0.8 | 1.0 | IPF16323     | 12043118..similar to Saccharomyces cerevisi            | orf19.6460  | 16323      | IPF16323   | PROTEIN FATE [folding modification destination]                                        | ""CONTROL OF CELL hydrolase activity                                    |                                     |
| CA3668 | 1.0 | 1.1 | 1.0 | 1.1 | 1.0 | 1.0 | DPP3         | complemer Diacylglycerol Pyrophosphate Pho             | orf19.6459  | 19996      | CaDPP3     | Lipid fatty-acid and isoprenoid metabolism                                             | ""CELL CYCLE AND DNA PR hydrolase activity                              |                                     |
| CA3669 | 1.0 | 0.9 | 0.9 | 1.0 | 1.1 | 1.0 | IPF19997     | 12048788..by homology to S. cerevisiae: U6             | snRNA assc  | 19997      | IPF19997   | No significant S.c. match                                                              |                                                                         |                                     |
| CA3670 | 1.0 | 1.1 | 1.0 | 1.0 | 1.0 | 1.1 | IPF13934     | 12049541..unknown function                             | orf19.6458  | 13934      | IPF13934   | No significant S.c. match                                                              |                                                                         |                                     |
| CA3671 | 1.0 | 1.0 | 1.0 | 1.0 | 1.1 | 1.1 | IPF13933     | complemer unknown function                             | orf19.6457  | 13933      | IPF13933   | C-compound and carbohydrate metabolism                                                 | molecular_function unknown                                              |                                     |
| CA3672 | 1.0 | 1.0 | 1.0 | 1.0 | 1.0 | 0.9 | IPF13669     | 12053915..unknown function                             | orf19.6456  | 13669      | IPF13669   | No significant S.c. match                                                              |                                                                         |                                     |
| CA3673 | 1.0 | 0.9 | 1.0 | 0.9 | 1.0 | 1.0 | IPF13667     | complemer unknown function                             | orf19.6455  | 13667      | IPF13667   | UNCLASSIFIED PROTEINS                                                                  | molecular_function unknown                                              |                                     |
| CA3674 | 1.0 | 1.1 | 1.0 | 0.9 | 0.8 | 1.0 | IPF19529.EXC | 12056759..unknown function, exon 1                     | orf19.6454  | 19529      | IPF19529.€ | No significant S.c. match                                                              |                                                                         |                                     |
| CA3675 | 0.9 | 1.0 | 1.0 | 1.1 | 1.1 | 0.9 | IPF19529.EXC | 12058245..unknown function, exon 2                     | orf19.6453  | 18311      | IPF19529.€ | No significant S.c. match                                                              |                                                                         |                                     |
| CA3676 | 1.0 | 1.1 | 1.1 | 1.0 | 1.0 | 1.1 | RBP1         | complemer rapamycin-binding prot                       | rapamycin-  | orf19.6452 | 8077       | CaRBP1                                                                                 | PROTEIN FATE [folding modification destination]                         | ""SUBCELLULAR LOCisomerase activity |
| CA3677 | 0.9 | 1.0 | 1.0 | 1.0 | 1.0 | 1.0 | SOU3         | 12070103..putative sorbitol utilization protein        | orf19.732   | 8391       | CaSOU3     | ENERGY SUBCELLULAR LOCALISATION                                                        |                                                                         |                                     |
| CA3678 | 1.0 | 1.0 | 1.0 | 1.0 | 1.0 | 0.9 | IPF8392      | 12071254..unknown function                             | orf19.731   | 8392       | IPF8392    | CLASSIFICATION NOT YET CLEAR-CUT                                                       | molecular_function unknown                                              |                                     |
| CA3679 | 1.1 | 0.9 | 1.0 | 0.9 | 1.0 | 0.9 | IPF20142     | 12073061..unknown function                             | orf19.730   | 20142      | IPF20142   | CELL FATE PROTEIN ACTIVITY REGULATION                                                  | enzyme regulator activity                                               |                                     |
| CA3680 | 1.0 | 1.0 | 1.0 | 1.0 | 1.0 | 1.0 | IPF8395      | 12076135..unknown function                             | orf19.729   | 8395       | IPF8395    | No significant S.c. match                                                              |                                                                         |                                     |
| CA3681 | 0.9 | 1.0 | 0.9 | 1.0 | 1.0 | 1.0 | IPF19787     | complemer unknown function                             | orf19.728   | 19787      | IPF19787   | UNCLASSIFIED PROTEINS                                                                  | protein binding                                                         |                                     |
| CA3683 | 0.9 | 1.0 | 1.0 | 1.0 | 1.0 | 1.0 | PPZ1         | complemer ser/thr phosphatase required for             | no          | orf19.726  | 13615      | CaPPZ1                                                                                 | CELL RESCUE DEFENSE AND VIRULENCE                                       | protein phosphatase activity        |
| CA3684 | 1.0 | 0.9 | 1.1 | 1.1 | 1.0 | 1.0 | IPF13613     | 12100562..unknown function                             | orf19.725   | 13613      | IPF13613   | No significant S.c. match                                                              |                                                                         |                                     |
| CA3685 | 1.1 | 1.1 | 1.0 | 1.1 | 1.0 | 1.1 | IPF19540     | complemer unknown function                             | orf19.723   | 19540      | IPF19540   | TRANSCRIPTION                                                                          | molecular_function unknown                                              |                                     |
| CA3686 | 1.1 | 1.0 | 1.1 | 1.3 | 1.0 | 1.0 | IPF4890      | 12111800..unknown function                             | orf19.1364  | 4890       | IPF4890    | TRANSPORT FACILITATION                                                                 | transporter activity                                                    |                                     |
| CA3687 | 1.0 | 1.0 | 0.9 | 0.9 | 1.0 | 1.1 | IPF4889      | complemer unknown function                             | orf19.6264  | 4889       | IPF4889    | C-compound and carbohydrate metabolism ENERGY TRANSCRIPTION CELL FATE SUBCELLULAR LOC. |                                                                         |                                     |
| CA3688 | 1.0 | 1.0 | 1.0 | 1.0 | 1.0 | 1.0 | YIP3.3       | 12115214..protein of unknown function, 3-prime end (by |             | 4885       | CaYIP3.3   | CELLULAR TRANSPORT AND TRANSPORT MECHANISMS                                            | molecular_function unknown                                              |                                     |
| CA3689 | 1.1 | 1.1 | 0.9 | 0.9 | 1.0 | 1.2 | RPS22A       | 12116904..ribosomal protein S15€ribosomal              | orf19.6265  | 4882       | CaRPS22A   | PROTEIN SYNTHESIS SUBCELLULAR LOCALISATION                                             | structural molecule activity                                            |                                     |
| CA3690 | 1.0 | 1.1 | 0.9 | 1.0 | 0.9 | 1.1 | RPS14B       | 12118211..ribosomal protein (by homology)              |             | 4881       | CaRPS14B   | PROTEIN SYNTHESIS SUBCELLULAR LOCALISATION                                             | RNA binding                                                             |                                     |
| CA3691 | 1.0 | 1.0 | 1.0 | 1.0 | 1.0 | 1.0 | IPF4880      | 12118919..unknown function                             | orf19.6266  | 4880       | IPF4880    | TRANSCRIPTION CELL FATE SUBCELLULAR LOCALISATION                                       |                                                                         |                                     |
| CA3692 | 1.0 | 1.0 | 0.9 | 1.0 | 1.0 | 1.0 | IPF4876      | 12122185..unknown function                             | orf19.6267  | 4876       | IPF4876    | No significant S.c. match                                                              |                                                                         |                                     |
| CA3693 | 1.0 | 1.0 | 1.0 | 1.0 | 1.0 | 1.0 | IPF4874      | 12125054..unknown function                             | orf19.6268  | 4874       | IPF4874    | UNCLASSIFIED PROTEINS                                                                  | molecular_function unknown                                              |                                     |
| CA3694 | 0.9 | 1.1 | 1.0 | 1.0 | 1.0 | 1.0 | IPF4872.3F   | complemer unknown function, 3-prime end                | orf19.6269  | 4873       | IPF4872.3f | PROTEIN FATE [folding modification destination]                                        | ""CELLULAR TRANSP AND TRANSPORT MECHAN                                  |                                     |
| CA3695 | 1.0 | 1.1 | 1.0 | 0.8 | 1.0 | 1.0 | IPF4872.5F   | complemer unknown function, 5-prime end                | orf19.6270  | 4872       | IPF4872.5f | No significant S.c. match                                                              |                                                                         |                                     |
| CA3696 | 1.0 | 1.0 | 1.0 | 1.0 | 1.0 | 1.0 | IPF4868      | 12131198..unknown function                             | orf19.1365f | 4868       | IPF4868    | SUBCELLULAR LOCALISATION                                                               | molecular_function unknown                                              |                                     |
| CA3697 | 0.9 | 1.0 | 1.0 | 1.0 | 0.9 | 1.0 | IPF4866      | complemer similar to Saccharomyces cerevisi            | orf19.1365  | 4866       | IPF4866    | PROTEIN FATE [folding modification destination]                                        | ""SUBCELLULAR LOCpeptidase activity                                     |                                     |
| CA3698 | 1.0 | 1.0 | 1.0 | 1.0 | 1.0 | 1.0 | IPF4861      | 12137078..unknown function                             | orf19.6274  | 4861       | IPF4861    | No significant S.c. match                                                              |                                                                         |                                     |
| CA3699 | 0.9 | 1.0 | 1.0 | 1.0 | 1.0 | 1.1 | IPF4860      | complemer similarity to ribosomal protein kina         | orf19.6275  | 4860       | IPF4860    | CLASSIFICATION NOT YET CLEAR-CUT                                                       | protein kinase activity                                                 |                                     |
| CA3700 | 0.9 | 0.9 | 1.0 | 1.0 | 0.9 | 1.0 | IPF4859      | complemer unknown function                             | orf19.6276  | 4859       | IPF4859    | No significant S.c. match                                                              |                                                                         |                                     |
| CA3701 | 1.0 | 1.0 | 0.9 | 1.0 | 1.0 | 1.1 | IPF11936.3F  | complemer unknown function, 5-prime end                | orf19.1365f | 19586      | IPF11936.€ | No significant S.c. match                                                              |                                                                         |                                     |
| CA3703 | 1.1 | 1.1 | 1.0 | 1.1 | 1.3 | 1.2 | IPF11945     | complemer unknown function                             | orf19.6281  | 11945      | IPF11945   | No significant S.c. match                                                              |                                                                         |                                     |
| CA3704 | 1.0 | 1.0 | 0.9 | 1.0 | 1.0 | 0.9 | IPF5671      | complemer unknown function                             | orf19.4946  | 5671       | IPF5671    | No significant S.c. match                                                              |                                                                         |                                     |
| CA3705 | 0.9 | 1.0 | 1.0 | 1.1 | 1.0 | 1.0 | MSH6         | 12160626..DNA mismatch repair protein by ho            | orf19.4945  | 5670       | CaMSH6     | CELL CYCLE AND DNA PROCESSING SUBCELLULAR LOCALISATIO                                  | DNA binding                                                             |                                     |
| CA3706 | 1.1 | 0.9 | 1.0 | 1.0 | 1.0 | 1.2 | PSA2         | complemer mannose-1-phosphate guanyltr                 | trans       | orf19.4943 | 5668       | CaPSA2                                                                                 | C-compound and carbohydrate metabolism CONTROL OF CELLULAR ORGANIZATION |                                     |
| CA3707 | 1.1 | 0.8 | 0.9 | 1.2 | 1.0 | 1.0 | TYE7         | 12170168..Basic helix-loop-helix transcription         | orf19.4941  | 5663       | CaTYE7     | C-compound and carbohydrate metabolism TRANSCRIPTION SUBCELL                           | DNA binding.transcription regulato                                      |                                     |
| CA3708 | 1.0 | 0.9 | 1.0 | 1.1 | 1.0 | 1.0 | HIP1         | 12171574..Histidine permease (by homology)             | orf19.4940  | 7876       | CaHIP1     | Amino acid metabolism CELLULAR TRANSPORT AND TRANSPORT MECHANISMS REGULATION OF/II     |                                                                         |                                     |
| CA3709 | 1.1 | 1.1 | 1.0 | 1.0 | 1.0 | 1.0 | IPF7880      | 12173743..unknown function                             | orf19.4939  | 7880       | IPF7880    | UNCLASSIFIED PROTEINS                                                                  | molecular_function unknown                                              |                                     |
| CA3710 | 1.1 | 1.1 | 0.9 | 1.0 | 1.0 | 1.0 | CHS3.5F      | 12180005..chitin-UDP acetyl-glucosaminyl tra           | orf19.4938  | 7886       | CaCHS3.5   | C-compound and carbohydrate metabolism CELL FATE CONTROL OF CELLULAR ORGANIZATION      | SUB                                                                     |                                     |
| CA3711 | 1.0 | 1.0 | 1.0 | 1.0 | 1.0 | 1.1 | CHS3.3F      | 12180306..chitin-UDP acetyl-glucx chitin synth         | orf19.4937  | 7889       | CaCHS3.3   | C-compound and carbohydrate metabolism CELL FATE CONTROL OF (                          | transferase activity                                                    |                                     |
| CA3712 | 1.0 | 0.9 | 1.0 | 0.9 | 1.0 | 1.0 | IPF7891      | complemer unknown function                             | orf19.4936  | 7891       | IPF7891    | No significant S.c. match                                                              |                                                                         |                                     |
| CA3713 | 1.0 | 1.0 | 1.0 | 0.9 | 1.0 | 1.0 | OPS4         | complemer opaque - phase specifi                       | OPAQUE-For  | orf19.4934 | 15453      | CaOPS4                                                                                 | No significant S.c. match                                               |                                     |

|        |     |     |     |     |     |     |            |                                                        |              |       |            |                                                                                |                                       |
|--------|-----|-----|-----|-----|-----|-----|------------|--------------------------------------------------------|--------------|-------|------------|--------------------------------------------------------------------------------|---------------------------------------|
| CA3714 | 1.1 | 1.0 | 1.0 | 1.1 | 1.0 | 1.0 | IPF16223   | 12194080..unknown function                             | orf19.11631  | 16223 | IPF16223   | UNCLASSIFIED PROTEINS                                                          | molecular_function unknown            |
| CA3715 | 1.0 | 1.0 | 1.0 | 1.0 | 1.0 | 1.0 | IPF6205    | 12197699..unknown function                             | orf19.4164   | 6205  | IPF6205    | UNCLASSIFIED PROTEINS                                                          | RNA binding                           |
| CA3716 | 1.0 | 1.0 | 1.0 | 1.0 | 1.1 | 1.0 | IPF6203    | complemer unknown function                             | orf19.1164;  | 6203  | IPF6203    | TRANSCRIPTION                                                                  |                                       |
| CA3717 | 1.0 | 0.9 | 1.1 | 0.9 | 1.0 | 1.0 | IPF6192    | 12205742..unknown function                             | orf19.1164;  | 6192  | IPF6192    | UNCLASSIFIED PROTEINS                                                          | molecular_function unknown            |
| CA3718 | 1.0 | 1.0 | 1.0 | 1.0 | 1.0 | 1.0 | POP7       | complemer Nuclear RNase P subunit (by hom              | orf19.1164   | 6191  | CaPOP7     | TRANSCRIPTION SUBCELLULAR LOCALISATION                                         | RNA binding                           |
| CA3719 | 0.8 | 1.0 | 0.9 | 1.0 | 1.0 | 1.0 | IPF6190    | 12207199..unknown function                             | orf19.1164;  | 6190  | IPF6190    | No significant S.c. match                                                      |                                       |
| CA3720 | 1.0 | 1.0 | 1.1 | 1.0 | 1.0 | 1.0 | IFL3       | complemer Unknown function                             | orf19.1164;  | 6188  | CaIFL3     | CELL RESCUE DEFENSE AND VIRULENCE ""CELL FATE                                  |                                       |
| CA3721 | 1.0 | 1.0 | 1.0 | 1.0 | 1.0 | 0.9 | IPF6186    | complemer unknown function                             | orf19.1164;  | 6186  | IPF6186    | No significant S.c. match                                                      |                                       |
| CA3722 | 1.1 | 1.0 | 1.0 | 1.0 | 1.0 | 0.9 | PHO13      | 12212650..4-nitrophenylphosphatase (by hom             | orf19.4172   | 6184  | CaPHO13    | Phosphate metabolism SUBCELLULAR LOCALISATION                                  |                                       |
| CA3723 | 1.0 | 1.0 | 1.0 | 1.1 | 1.1 | 1.0 | DPH2       | 12213872..Diphtheria toxin resistance protein          | orf19.4173   | 6183  | CaDPH2     | Amino acid metabolism                                                          | molecular_function unknown            |
| CA3724 | 1.1 | 1.1 | 1.0 | 0.9 | 1.0 | 1.0 | IPF6181    | complemer similar to Saccharomyces cerevisi            | orf19.4174   | 6181  | IPF6181    | Nucleotide metabolism                                                          | transporter activity                  |
| CA3725 | 1.0 | 1.1 | 1.0 | 1.0 | 1.0 | 1.0 | TOK1.3     | complemer Outward-rectifier potassium chann            | orf19.4175   | 6179  | CaTOK1.3   | CELLULAR TRANSPORT AND TRANSPORT MECHANISMS REGULA                             | transporter activity                  |
| CA3726 | 1.0 | 1.1 | 1.0 | 0.9 | 1.1 | 1.0 | IPF6175    | complemer unknown function                             | orf19.4176   | 6175  | IPF6175    | PROTEIN SYNTHESIS                                                              | structural molecule activity          |
| CA3727 | 1.0 | 1.1 | 1.0 | 1.0 | 1.1 | 1.0 | HIS5.3F    | complemer Histidinol-phosphate aminotransfe            | orf19.4177   | 6173  | CaHIS5.3F  | Amino acid metabolism                                                          | transferase activity                  |
| CA3729 | 1.0 | 1.1 | 1.0 | 1.0 | 1.0 | 0.9 | IPF11901   | complemer unknown function                             | orf19.4179   | 11901 | IPF11901   | No significant S.c. match                                                      |                                       |
| CA3730 | 1.1 | 1.0 | 1.0 | 0.9 | 0.9 | 1.0 | IPF11900   | 12223031..unknown function                             | orf19.4180   | 11900 | IPF11900   | PROTEIN FATE [folding modification destination] ""CELLULAR TRANSP              | transporter activity                  |
| CA3731 | 1.0 | 1.0 | 1.1 | 1.1 | 0.9 | 1.0 | SPC2       | 12224114..signal peptidase 18 kDa subunit (t           | orf19.4181   | 11899 | CaSPC2     | PROTEIN FATE [folding modification destination] ""SUBCELLULAR LOC              | protein binding                       |
| CA3732 | 1.0 | 1.0 | 1.0 | 1.0 | 1.0 | 1.0 | IPF11898   | complemer unknown function                             | orf19.4182   | 11898 | IPF11898   | UNCLASSIFIED PROTEINS                                                          |                                       |
| CA3733 | 1.1 | 1.0 | 0.9 | 1.1 | 0.9 | 0.9 | IPF11897   | 12225959..unknown function                             | orf19.1165;  | 11897 | IPF11897   | C-compound and carbohydrate metabolism SUBCELLULAR LOCALISATION                |                                       |
| CA3735 | 1.0 | 1.0 | 1.0 | 1.0 | 1.0 | 1.1 | IPF5534    | 12229437..5-oxo-1,2,5-tricarboxilic-3-penten           | orf19.2184   | 5534  | IPF5534    | UNCLASSIFIED PROTEINS                                                          |                                       |
| CA3736 | 1.1 | 1.1 | 0.9 | 1.0 | 1.1 | 1.0 | IPF5533    | complemer ABC transporter (by homology)                | orf19.2183   | 5533  | IPF5533    | TRANSPORT FACILITATION                                                         | transporter activity,hydrolase activi |
| CA3737 | 1.1 | 1.0 | 1.0 | 1.0 | 1.0 | 1.1 | BLM3       | 12235622..bleomycin resistance (by homology            | orf19.2182   | 5529  | CaBLM3     | UNCLASSIFIED PROTEINS                                                          | molecular_function unknown            |
| CA3738 | 1.0 | 1.0 | 1.0 | 1.0 | 1.0 | 1.0 | IPF5526    | complemer unknown function                             | orf19.2180   | 5526  | IPF5526    | UNCLASSIFIED PROTEINS                                                          | molecular_function unknown            |
| CA3739 | 1.0 | 1.0 | 0.9 | 0.6 | 1.0 | 1.1 | RPS10.3    | complemer ribosomal protein, 3-prime end (by homology) | orf19.2179   | 5524  | CaRPS10.3  | PROTEIN SYNTHESIS SUBCELLULAR LOCALISATION                                     | structural molecule activity          |
| CA3740 | 0.9 | 1.0 | 1.1 | 0.9 | 1.0 | 1.1 | SIT1       | complemer Ferrioxamine B permease by homio             | orf19.2178   | 5522  | CaSIT1     | CELL RESCUE DEFENSE AND VIRULENCE ""TRANSPORT FACILITA                         | transporter activity                  |
| CA3741 | 1.1 | 1.0 | 0.9 | 1.0 | 1.0 | 1.0 | MR54       | complemer RNA splicing protein and member              | orf19.2178   | 5513  | CaMR54     | TRANSCRIPTION CELLULAR TRANSPORT AND TRANSPORT MECH                            | transporter activity                  |
| CA3742 | 1.0 | 1.1 | 1.0 | 1.0 | 1.0 | 0.9 | IFM3       | complemer 2-hydroxyacid dehydrogenase by lo            | orf19.2176   | 5511  | CaIFM3     | C-compound and carbohydrate metabolism                                         |                                       |
| CA3743 | 1.1 | 0.9 | 0.9 | 1.0 | 1.1 | 1.0 | IPF19998   | 12253720..unknown function                             | orf19.2175   | 19998 | IPF19998   | UNCLASSIFIED PROTEINS                                                          | oxidoreductase activity               |
| CA3744 | 1.1 | 1.0 | 1.1 | 1.0 | 1.0 | 0.9 | RAD57      | 12255054..DNA-repair like protein                      | orf19.2174   | 10144 | CaRAD57    | CELL CYCLE AND DNA PROCESSING CELL FATE SUBCELLULAR LC                         | protein binding                       |
| CA3745 | 1.1 | 1.0 | 1.0 | 1.0 | 1.0 | 0.9 | MAF1       | 12257282..nuclear protein by homology                  | orf19.2173   | 10146 | CaMAF1     | PROTEIN FATE [folding modification destination]                                | molecular_function unknown            |
| CA3746 | 1.0 | 1.1 | 1.1 | 1.0 | 1.1 | 1.0 | ARA1       | 12258916..D-arabinose dehydrogenase (by h              | orf19.2172   | 10148 | CaARA1     | C-compound and carbohydrate metabolism                                         | oxidoreductase activity               |
| CA3747 | 1.0 | 1.0 | 1.1 | 1.0 | 1.2 | 1.1 | IPF10153   | complemer membrane transporter by homolog              | orf19.2170   | 10153 | IPF10153   | UNCLASSIFIED PROTEINS                                                          | molecular_function unknown            |
| CA3748 | 1.0 | 1.1 | 1.0 | 0.9 | 1.0 | 1.0 | IPF7385    | 12269447..unknown function                             | orf19.3430   | 7385  | IPF7385    | No significant S.c. match                                                      |                                       |
| CA3749 | 0.9 | 0.9 | 1.0 | 1.0 | 1.1 | 1.0 | IPF7389    | complemer unknown function                             | orf19.3429   | 7389  | IPF7389    | No significant S.c. match                                                      |                                       |
| CA3750 | 1.0 | 1.0 | 1.0 | 1.1 | 1.1 | 1.0 | IPF7377    | 12278199..unknown function                             | orf19.3428   | 7377  | IPF7377    | UNCLASSIFIED PROTEINS                                                          |                                       |
| CA3751 | 1.0 | 1.0 | 1.0 | 0.9 | 1.0 | 1.1 | IPF7378    | 12279864..unknown function                             | orf19.3427   | 7378  | IPF7378    | No significant S.c. match                                                      |                                       |
| CA3752 | 1.1 | 1.0 | 1.5 | 1.1 | 1.0 | 1.1 | TIF51.3    | 12281670..translation initiation facelf-5A [Ca         | orf19.3426   | 20144 | CaTIF51.3  | UNCLASSIFIED PROTEINS                                                          | translation regulator activity        |
| CA3753 | 1.0 | 1.0 | 1.0 | 1.0 | 1.0 | 1.0 | IPF14743   | 12284650..unknown function                             | orf19.3425   | 14743 | IPF14743   | UNCLASSIFIED PROTEINS                                                          |                                       |
| CA3754 | 1.0 | 0.9 | 1.1 | 1.1 | 1.0 | 1.2 | TIF3       | 12286967..translation initiation factor eIF4B          | (torf19.3423 | 16643 | CaTIF3     | PROTEIN SYNTHESIS SUBCELLULAR LOCALISATION                                     | translation regulator activity        |
| CA3755 | 1.0 | 1.0 | 1.0 | 1.0 | 1.0 | 1.0 | IPF17743   | 12289536..Unknown function                             |              | 17743 | IPF17743   | TRANSCRIPTION ""CELL RESCUE DEFENSE AND VIRULENCE ""SU                         | transcription regulator activity      |
| CA3756 | 1.1 | 1.1 | 1.0 | 1.0 | 1.0 | 1.2 | IPF8884    | complemer unknown function                             | orf19.3422   | 8884  | IPF8884    | UNCLASSIFIED PROTEINS                                                          | molecular_function unknown            |
| CA3757 | 1.1 | 1.0 | 1.0 | 1.0 | 1.1 | 1.0 | MAE1       | 12300384..mitochondrial malic enzyme (by h             | orf19.3419   | 8888  | CaMAE1     | C-compound and carbohydrate metabolism SUBCELLULAR LOCALISA                    | oxidoreductase activity               |
| CA3758 | 1.0 | 1.0 | 0.9 | 1.0 | 1.0 | 1.0 | IPF8889    | complemer putative arginase (by homology)              | orf19.1092;  | 8889  | IPF8889    | Amino acid metabolism Nitrogen and sulphur metabolism SUBCELLULAR LOCALISATION |                                       |
| CA3759 | 0.9 | 1.0 | 1.1 | 1.0 | 1.0 | 1.0 | IPF13139   | 12310473..unknown function                             | orf19.2910   | 13139 | IPF13139   | No significant S.c. match                                                      |                                       |
| CA3760 | 1.0 | 1.0 | 0.9 | 1.0 | 1.0 | 1.0 | ERG26      | complemer C-3 sterol dehydrogenase (C-4 de             | orf19.2909   | 13138 | CaERG26    | Lipid fatty-acid and isoprenoid metabolism                                     | oxidoreductase activity               |
| CA3761 | 1.0 | 1.1 | 1.1 | 1.0 | 0.9 | 1.0 | IFR3       | complemer unknown function                             | orf19.2908   | 13137 | CaIFR3     | CELLULAR LOCALISATION                                                          |                                       |
| CA3762 | 1.0 | 1.1 | 1.0 | 1.0 | 1.0 | 1.0 | IPF13135   | complemer unknown function                             | orf19.2907   | 13135 | IPF13135   | No significant S.c. match                                                      |                                       |
| CA3763 | 1.0 | 1.0 | 1.0 | 1.1 | 1.0 | 1.0 | IPF13070   | complemer unknown function                             | orf19.2906   | 13070 | IPF13070   | No significant S.c. match                                                      |                                       |
| CA3764 | 1.1 | 1.1 | 1.0 | 1.0 | 1.0 | 1.0 | IPF13072   | complemer unknown function                             | orf19.2905   | 13072 | IPF13072   | No significant S.c. match                                                      |                                       |
| CA3765 | 0.9 | 0.9 | 1.1 | 1.3 | 1.2 | 1.1 | IPF18298   | 12321271..unknown function                             | orf19.2904   | 18298 | IPF18298   | Lipid fatty-acid and isoprenoid metabolism                                     |                                       |
| CA3766 | 1.1 | 1.0 | 1.1 | 1.2 | 1.1 | 1.2 | IPF18298.3 | 12321970..unknown function, 3-prime end                | orf19.2903   | 16014 | IPF18298.3 | No significant S.c. match                                                      |                                       |
| CA3767 | 1.1 | 1.1 | 1.0 | 1.0 | 1.1 | 1.1 | NUP60      | complemer Putative nuclear pore protein (by hor        | orf19.2901   | 13471 | CaNUP60    | CELLULAR TRANSPORT AND TRANSPORT MECHANISMS                                    | structural molecule activity          |
| CA3768 | 1.0 | 1.0 | 1.0 | 1.1 | 1.1 | 1.0 | IPF13467   | complemer Putative peroxisomal 2,4-dienoyl-C           | orf19.2899   | 13467 | IPF13467   | ENERGY SUBCELLULAR LOCALISATION                                                |                                       |
| CA3769 | 1.1 | 1.0 | 1.0 | 1.0 | 1.0 | 1.0 | IPF13465   | complemer Putative anion transport protein (b          | orf19.2898   | 13465 | IPF13465   | CLASSIFICATION NOT YET CLEAR-CUT                                               | transporter activity                  |
| CA3770 | 1.0 | 1.0 | 0.9 | 1.0 | 1.0 | 1.0 | SOU2       | 12331220..Sorbitol utilization protein Sou2p           | [orf19.2897  | 13462 | CaSOU2     | ENERGY SUBCELLULAR LOCALISATION                                                |                                       |
| CA3771 | 1.0 | 1.0 | 1.0 | 1.0 | 1.0 | 1.0 | SOU1       | 12332930..Sorbitol utilization protein Sou1p           | [orf19.2896  | 11150 | CaSOU1     | ENERGY SUBCELLULAR LOCALISATION                                                |                                       |
| CA3772 | 1.0 | 1.0 | 1.0 | 1.1 | 1.0 | 1.1 | VMA8       | complemer CANAL VACUOLAR ATP SYNTH                     | orf19.2895   | 11151 | CaVMA8     | CELLULAR TRANSPORT AND TRANSPORT MECHANISMS REGULA                             | transporter activity                  |
| CA3773 | 0.9 | 0.9 | 1.1 | 1.0 | 1.0 | 1.0 | IPF11153   | 12335071..unknown function                             | orf19.2893   | 11153 | IPF11153   | CELL CYCLE AND DNA PROCESSING TRANSCRIPTION                                    | molecular_function unknown            |
| CA3774 | 0.9 | 1.0 | 1.0 | 1.0 | 1.0 | 1.0 | IPF10437   | 12340660..budding protein-like (by homology)           | orf19.2892   | 10437 | IPF10437   | CELL FATE                                                                      | molecular_function unknown            |
| CA3775 | 0.9 | 0.9 | 1.0 | 1.0 | 1.0 | 0.9 | AFG1       | complemer ATPase family gene (by homology              | orf19.2891   | 10436 | CaAFG1     | CLASSIFICATION NOT YET CLEAR-CUT                                               | hydrolase activity                    |
| CA3776 | 1.0 | 1.0 | 0.9 | 1.0 | 1.0 | 1.0 | IPF10435   | complemer unknown function                             | orf19.2890   | 10435 | IPF10435   | UNCLASSIFIED PROTEINS                                                          |                                       |
| CA3777 | 1.0 | 1.0 | 1.0 | 0.9 | 0.9 | 1.0 | IPF10432   | 12347748..unknown function                             | orf19.2889   | 10432 | IPF10432   | UNCLASSIFIED PROTEINS                                                          | molecular_function unknown            |
| CA3778 | 1.0 | 1.0 | 0.9 | 1.2 | 1.1 | 1.2 | IPF10431   | complemer unknown function                             | orf19.2888   | 10431 | IPF10431   | No significant S.c. match                                                      |                                       |
| CA3779 | 1.0 | 1.0 | 1.1 | 0.9 | 1.0 | 0.9 | IPF11221   | 12353921..unknown function                             | orf19.5841   | 11221 | IPF11221   | No significant S.c. match                                                      |                                       |
| CA3780 | 1.0 | 0.9 | 1.1 | 1.0 | 1.0 | 1.0 | IPF11222   | complemer unknown function                             | orf19.5840   | 11222 | IPF11222   | No significant S.c. match                                                      |                                       |
| CA3781 | 1.0 | 1.0 | 1.0 | 1.0 | 1.0 | 1.0 | IPF11224   | 12355232..similar to Saccharomyces cerevisi            | orf19.5839   | 11224 | IPF11224   | Lipid fatty-acid and isoprenoid metabolism                                     | transporter activity                  |
| CA3782 | 1.0 | 1.0 | 1.0 | 1.0 | 1.0 | 1.0 | SER2       | 12356659..phosphoserine phosphatase by ho              | orf19.5838   | 11225 | CaSER2     | Amino acid metabolism                                                          | hydrolase activity                    |
| CA3783 | 1.0 | 1.0 | 1.0 | 1.0 | 1.0 | 1.0 | IPF11226   | complemer unknown function                             | orf19.5837   | 11226 | IPF11226   | UNCLASSIFIED PROTEINS                                                          | molecular_function unknown            |
| CA3784 | 0.9 | 1.0 | 1.1 | 1.1 | 1.0 | 1.0 | IPF11229   | complemer similar to Saccharomyces cerevisi            | orf19.5835   | 11229 | IPF11229   | TRANSCRIPTION PROTEIN SYNTHESIS ""PROTEIN FATE [folding mo                     | molecular_function unknown            |
| CA3785 | 1.0 | 1.0 | 1.0 | 1.0 | 1.0 | 1.0 | IPF19788   | 12359996..similar to Saccharomyces cerevisi            | orf19.5834   | 19788 | IPF19788   | TRANSCRIPTION CELLULAR TRANSPORT AND TRANSPORT MECH                            | protein binding                       |
| CA3786 | 1.1 | 1.1 | 1.0 | 1.0 | 1.0 | 1.0 | UFD1       | 12363355..Ubiquitin fusion degradation protei          | orf19.5833   | 14267 | CaUFD1     | PROTEIN FATE [folding modification destination]                                | protein binding                       |
| CA3787 | 1.0 | 1.1 | 0.9 | 0.9 | 1.0 | 1.0 | HPT1       | complemer hypoxanthine guanine phosphorib              | orf19.5832   | 14266 | CaHPT1     | Nucleotide metabolism Purine ribonucleotide metabolism                         | transferase activity                  |

|        |     |     |     |     |     |     |            |                                                           |             |       |           |                                                                    |                                  |
|--------|-----|-----|-----|-----|-----|-----|------------|-----------------------------------------------------------|-------------|-------|-----------|--------------------------------------------------------------------|----------------------------------|
| CA3788 | 0.9 | 1.0 | 1.0 | 1.1 | 1.0 | 1.0 | IPF16445   | complemer unknown function                                | orf19.5831  | 16445 | IPF16445  | No significant S.c. match                                          |                                  |
| CA3789 | 1.0 | 1.0 | 1.0 | 1.0 | 1.0 | 1.1 | IPF11217   | 12368047..similar to Saccharomyces cerevisi               | orf19.1325: | 11217 | IPF11217  | PROTEIN FATE [folding modification destination] ""                 | SUBCELLULAR LOC                  |
| CA3790 | 1.1 | 1.1 | 1.0 | 1.0 | 1.1 | 1.0 | IPF11215   | 12371174..unknown function                                | orf19.1325: | 11215 | IPF11215  | TRANSCRIPTION SUBCELLULAR LOCALISATION                             | RNA binding                      |
| CA3791 | 1.0 | 1.0 | 1.0 | 1.0 | 0.8 | 1.0 | IPF11212   | complemer similar to Saccharomyces cerevisi               | orf19.5827  | 11212 | IPF11212  | CELL CYCLE AND DNA PROCESSING                                      | enzyme regulator activity        |
| CA3792 | 0.9 | 1.0 | 1.0 | 0.9 | 0.9 | 0.9 | UGA5       | complemer GABA-SPECIFIC TRANSPORT P                       | orf19.5826  | 11211 | CaUGA5    | No significant S.c. match                                          |                                  |
| CA3793 | 1.0 | 1.0 | 1.0 | 1.0 | 1.0 | 1.0 | IPF5701    | 12377945..unknown function                                |             | 5701  | IPF5701   | No significant S.c. match                                          | structural molecule activity     |
| CA3794 | 0.9 | 1.0 | 0.9 | 1.0 | 1.0 | 1.0 | NCB2       | complemer Transcriptional repressor by homo               | orf19.5825  | 5700  | CaNCB2    | TRANSCRIPTION SUBCELLULAR LOCALISATION                             | transcription regulator activity |
| CA3795 | 1.0 | 1.1 | 1.0 | 1.1 | 1.0 | 1.0 | IPF5699    | complemer Abhydrolase by homology                         | orf19.5824  | 5699  | IPF5699   | UNCLASSIFIED PROTEINS                                              |                                  |
| CA3796 | 1.1 | 1.1 | 1.0 | 0.9 | 1.0 | 0.9 | SGT2       | complemer small glutamine-rich tetratricopepti            | orf19.5823  | 5697  | CaSGT2    | UNCLASSIFIED PROTEINS                                              | molecular_function unknown       |
| CA3797 | 0.9 | 1.1 | 1.0 | 1.1 | 1.0 | 1.2 | IPF5623    | complemer unknown function                                | orf19.5821  | 5693  | IPF5623   | UNCLASSIFIED PROTEINS                                              | molecular_function unknown       |
| CA3799 | 1.0 | 1.0 | 1.0 | 1.0 | 1.0 | 1.0 | IPF7198    | 12387813..unknown function                                | orf19.1001: | 7198  | IPF7198   | CELL CYCLE AND DNA PROCESSING SUBCELLULAR LOCALISATION             |                                  |
| CA3800 | 1.0 | 1.1 | 1.0 | 1.0 | 1.0 | 1.1 | RPL7A.3    | complemer 60S Ribosomal Protein L7-A, 3-prime end         |             | 7197  | CaRPL7A.3 | PROTEIN SYNTHESIS SUBCELLULAR LOCALISATION                         | structural molecule activity     |
| CA3801 | 1.1 | 1.1 | 1.0 | 1.0 | 1.0 | 0.9 | UGA4       | 12394943..GABA-specific transport protein                 | orf19.1001: | 7194  | CaUGA4    | No significant S.c. match                                          | transporter activity             |
| CA3802 | 1.1 | 1.5 | 1.2 | 1.1 | 1.1 | 1.1 | AUT7.EXON2 | complemer microtubule-associated protein essential for ai |             | 12408 | CaAUT7.ex | PROTEIN FATE [folding modification destination] ""                 | CELLULAR TRANSP                  |
| CA3803 | 1.1 | 1.1 | 1.0 | 1.0 | 1.0 | 0.9 | IPF12407   | 12398139..unknown function                                | orf19.2481  | 12407 | IPF12407  | No significant S.c. match                                          | protein binding                  |
| CA3804 | 1.0 | 0.9 | 0.8 | 0.9 | 1.0 | 1.1 | RIM1       | 12399164..telomere-binding protein (by homo               | orf19.2483  | 12405 | CaRIM1    | No significant S.c. match                                          |                                  |
| CA3805 | 0.9 | 1.1 | 1.0 | 1.0 | 1.1 | 1.1 | IPF12403   | complemer unknown function                                | orf19.2484  | 12403 | IPF12403  | PROTEIN FATE [folding modification destination]                    | molecular_function unknown       |
| CA3806 | 0.9 | 0.9 | 1.0 | 1.0 | 0.9 | 1.0 | IPF9224    | 12401531..similar to Saccharomyces cerevisi               | orf19.2485  | 9224  | IPF9224   | CELL CYCLE AND DNA PROCESSING CELLULAR TRANSPORT AND               | structural molecule activity     |
| CA3807 | 1.0 | 1.0 | 1.0 | 1.0 | 1.0 | 1.0 | IPF9225    | complemer unknown function                                | orf19.2487  | 9225  | IPF9225   | Nucleotide metabolism Purine ribonucleotide metabolism             | molecular_function unknown       |
| CA3808 | 1.0 | 1.0 | 1.0 | 1.0 | 1.0 | 1.0 | FAL1       | 12406774..ATP-dependent RNA t ATP-depen                   | orf19.2488  | 9226  | CaFAL1    | TRANSCRIPTION SUBCELLULAR LOCALISATION                             | RNA binding,helicase activity    |
| CA3809 | 1.2 | 1.1 | 1.1 | 1.0 | 1.0 | 1.0 | KAP123     | 12408257..karyopherin-beta protein (by homo               | orf19.2489  | 9227  | CaKAP123  | PROTEIN FATE [folding modification destination] ""                 | CELLULAR TRANSP                  |
| CA3810 | 0.8 | 0.9 | 1.0 | 1.0 | 1.0 | 1.0 | IPF9230    | 12412100..similar to Saccharomyces cerevisi               | orf19.2492  | 9230  | IPF9230   | CELLULAR COMMUNICATION/SIGNAL TRANSDUCTION MECHANISM               | signal transducer activity       |
| CA3811 | 1.1 | 1.0 | 0.9 | 1.1 | 1.0 | 0.8 | PET112     | complemer glutamyl-tRNA (GLN) amidotransf                 | orf19.2494  | 9233  | CaPET112  | PROTEIN SYNTHESIS SUBCELLULAR LOCALISATION                         | molecular_function unknown       |
| CA3812 | 1.0 | 1.1 | 1.0 | 1.0 | 1.0 | 1.0 | GSL22      | complemer 1,3-beta-D-glucan synthase subun                | orf19.2495  | 4913  | CaGSL22   | C-compound and carbohydrate metabolism                             |                                  |
| CA3813 | 1.0 | 1.0 | 1.1 | 1.1 | 1.0 | 1.1 | FRP1       | 12421523..member of the FRP family of prote               | orf19.2496  | 4026  | CaFRP1    | C-compound and carbohydrate metabolism                             |                                  |
| CA3814 | 1.0 | 1.1 | 0.9 | 1.0 | 1.0 | 0.9 | IPF4023    | 12423340..unknown function                                | orf19.2498  | 4023  | IPF4023   | CELL FATE                                                          | molecular_function unknown       |
| CA3815 | 1.1 | 1.1 | 1.1 | 1.0 | 0.9 | 1.0 | CYP7       | complemer peptidyl-prolyl cis-trans isomerase             | orf19.2499  | 4018  | CaCYP7    | TRANSCRIPTION ""PROTEIN FATE [folding modification destination] "" | (c) chaperone activity           |
| CA3816 | 1.0 | 1.0 | 0.9 | 0.9 | 0.9 | 0.9 | IPF4017    | 12426495..unknown function                                | orf19.2500  | 4017  | IPF4017   | No significant S.c. match                                          |                                  |
| CA3818 | 1.0 | 1.0 | 1.1 | 1.0 | 1.1 | 1.1 | IPF6695    | 12443908..unknown function                                | orf19.5773  | 6995  | IPF6695   | UNCLASSIFIED PROTEINS                                              | molecular_function unknown       |
| CA3819 | 0.9 | 1.0 | 1.0 | 1.0 | 1.1 | 1.0 | IPF6993    | 12451889..unknown function                                | orf19.5772  | 6993  | IPF6993   | UNCLASSIFIED PROTEINS                                              | molecular_function unknown       |
| CA3820 | 0.9 | 1.0 | 1.1 | 0.9 | 1.0 | 1.1 | PBP2       | 12453231..PAB1 binding protein (by homolog                | orf19.5771  | 6992  | CaPBP2    | TRANSCRIPTION UNCLASSIFIED PROTEINS                                | molecular_function unknown       |
| CA3821 | 1.0 | 1.1 | 0.9 | 0.9 | 0.9 | 1.0 | IPF6990    | complemer unknown function                                | orf19.5770  | 6990  | IPF6990   | UNCLASSIFIED PROTEINS                                              | molecular_function unknown       |
| CA3822 | 0.9 | 1.0 | 1.0 | 1.0 | 1.1 | 0.9 | CUS2       | 12459077..cold sensitive U2 snRNA Suppress                | orf19.5767  | 20001 | CaCUS2    | TRANSCRIPTION                                                      | RNA binding                      |
| CA3823 | 1.0 | 1.0 | 1.0 | 1.1 | 1.2 | 1.0 | IPF10651   | complemer unknown function                                | orf19.5765  | 10651 | IPF10651  | TRANSCRIPTION CELLULAR TRANSPORT AND TRANSPORT MECH.               | structural molecule activity     |
| CA3824 | 1.1 | 1.0 | 1.0 | 1.0 | 1.0 | 1.0 | SK18       | 12462546..antiviral protein-like (by homology)            | orf19.5764  | 10653 | CaSK18    | CELL CYCLE AND DNA PROCESSING ""CELL RESCUE DEFENSE AM             | translation regulator activity   |
| CA3825 | 1.0 | 1.0 | 1.0 | 1.1 | 1.0 | 1.0 | IPF10654   | complemer D-arabinitol dehydrogenase-like (b              | orf19.5763  | 10654 | IPF10654  | ENERGY SUBCELLULAR LOCALISATION                                    |                                  |
| CA3826 | 1.0 | 1.0 | 1.0 | 1.0 | 1.0 | 1.0 | IPF20148   | 12466008..unknown function                                | orf19.5762  | 20148 | IPF20148  | No significant S.c. match                                          |                                  |
| CA3827 | 0.9 | 0.8 | 0.9 | 0.7 | 0.9 | 0.9 | IPF10662   | 12469047..unknown function                                | orf19.5760  | 10662 | IPF10662  | No significant S.c. match                                          |                                  |
| CA3828 | 1.0 | 1.1 | 1.0 | 1.0 | 1.0 | 1.1 | SNQ2       | 12471725..multidrug resistance protein (by h              | orf19.5759  | 13913 | CaSNQ2    | Lipid fatty-acid and isoprenoid metabolism ""                      | CELL RESCUE DEFENSE              |
| CA3829 | 1.1 | 1.0 | 1.0 | 1.0 | 1.0 | 1.0 | PPQ1       | complemer phosphoprotein phosphatase (by t                | orf19.5758  | 13917 | CaPPQ1    | PROTEIN SYNTHESIS                                                  | transporter activity             |
| CA3830 | 1.0 | 0.9 | 0.9 | 1.0 | 1.0 | 1.0 | SSF1       | 12479848..mating protein (by homology)                    | orf19.6589  | 8195  | CaSSF1    | CELL FATE                                                          | RNA binding                      |
| CA3831 | 1.0 | 1.0 | 1.0 | 0.9 | 0.9 | 1.0 | VMA22      | complemer vacuolar ATPase assembly proteir                | orf19.6590  | 8194  | CaVMA22   | PROTEIN FATE [folding modification destination] ""                 | SUBCELLULAR LOC                  |
| CA3832 | 0.9 | 1.0 | 1.0 | 0.9 | 0.9 | 1.0 | IPF8193    | complemer unknown function                                | orf19.6591  | 8193  | IPF8193   | Metabolism of vitamins cofactors and prosthetic groups             | hydrolase activity               |
| CA3833 | 1.1 | 1.0 | 1.1 | 1.0 | 1.0 | 1.0 | IPF8192    | complemer unknown function                                | orf19.6592  | 8192  | IPF8192   | No significant S.c. match                                          |                                  |
| CA3834 | 1.0 | 0.7 | 0.9 | 0.8 | 1.0 | 0.7 | PLB3       | 12488494..phospholipase B (by homology)                   | orf19.6594  | 8186  | CaPLB3    | Lipid fatty-acid and isoprenoid metabolism ""                      | SUBCELLULAR LOCALISA             |
| CA3835 | 1.0 | 1.0 | 1.0 | 1.0 | 1.0 | 1.0 | RTA4       | 12492448..Protein involved in 7-aminocholest              | orf19.6595  | 8181  | CaRTA4    | UNCLASSIFIED PROTEINS                                              | hydrolase activity               |
| CA3836 | 1.2 | 1.1 | 1.0 | 1.0 | 1.0 | 1.1 | IPF8179    | 12494486..putative esterase (by homology)                 | orf19.6596  | 8179  | IPF8179   | Lipid fatty-acid and isoprenoid metabolism                         | hydrolase activity               |
| CA3838 | 0.9 | 1.2 | 1.0 | 1.0 | 1.0 | 1.0 | LAS17      | complemer actin assembly factor (by homolog               | orf19.6598  | 12743 | CaLAS17   | CELL CYCLE AND DNA PROCESSING ""PROTEIN FATE [folding modifi       | protein binding                  |
| CA3839 | 1.0 | 1.0 | 1.0 | 0.9 | 1.0 | 1.0 | IPF12744   | 12499739..unknown function                                |             | 12744 | IPF12744  | No significant S.c. match                                          |                                  |
| CA3840 | 1.0 | 0.9 | 1.0 | 1.0 | 1.0 | 1.0 | IPF12745   | 12501409..unknown function                                | orf19.6600  | 12745 | IPF12745  | CLASSIFICATION NOT YET CLEAR-CUT                                   | molecular_function unknown       |
| CA3841 | 1.0 | 0.9 | 1.0 | 1.0 | 1.0 | 1.1 | IPF16640   | 12503398..unknown function                                | orf19.6601  | 16640 | IPF16640  | No significant S.c. match                                          |                                  |
| CA3842 | 1.2 | 1.0 | 0.9 | 1.1 | 1.2 | 1.0 | YKE2.3     | 12505413..Gim complex component, 3-prime end (by ho       |             | 7948  | CaYKE2.3  | PROTEIN FATE [folding modification destination] ""                 | CONTROL OF CELL                  |
| CA3843 | 1.2 | 1.2 | 1.0 | 1.0 | 1.0 | 1.0 | IPF7947    | complemer unknown function                                | orf19.6602  | 7947  | IPF7947   | UNCLASSIFIED PROTEINS                                              | molecular_function unknown       |
| CA3844 | 1.1 | 1.1 | 1.2 | 1.0 | 1.1 | 1.1 | IPF7945    | 12508388..unknown function                                | orf19.6604  | 7945  | IPF7945   | No significant S.c. match                                          |                                  |
| CA3845 | 1.0 | 1.0 | 1.1 | 1.0 | 1.0 | 1.0 | IPF7944    | complemer unknown function                                | orf19.6605  | 7944  | IPF7944   | UNCLASSIFIED PROTEINS                                              | molecular_function unknown       |
| CA3846 | 1.2 | 1.2 | 1.0 | 1.0 | 1.0 | 1.1 | IPF7943    | 12510810..unknown function                                | orf19.6606  | 7943  | IPF7943   | No significant S.c. match                                          |                                  |
| CA3847 | 0.9 | 1.1 | 1.1 | 1.1 | 1.0 | 1.1 | IPF7942    | 12513243..NADH-ubiquinone oxidoreductase                  | orf19.6607  | 7942  | IPF7942   | No significant S.c. match                                          |                                  |
| CA3848 | 1.2 | 1.0 | 0.8 | 0.8 | 0.9 | 1.2 | IPF7940    | 12515029..unknown function                                | orf19.6608  | 7940  | IPF7940   | No significant S.c. match                                          |                                  |
| CA3849 | 0.9 | 1.0 | 0.9 | 1.0 | 1.0 | 1.0 | IPF7938    | 12517774..similar to Saccharomyces cerevisi               | orf19.6610  | 7938  | IPF7938   | SUBCELLULAR LOCALISATION                                           | structural molecule activity     |
| CA3850 | 1.0 | 0.9 | 1.1 | 0.9 | 1.0 | 1.0 | IPF7932    | 12520919..similar to Saccharomyces cerevisi               | orf19.6612  | 7932  | IPF7932   | ENERGY SUBCELLULAR LOCALISATION                                    | molecular_function unknown       |
| CA3851 | 0.9 | 0.9 | 1.0 | 1.0 | 1.0 | 1.0 | CTA21      | 12533211..transcriptional activation                      | orf19.6112  | 10779 | CaCTA21   | No significant S.c. match                                          |                                  |
| CA3852 | 1.1 | 1.0 | 1.0 | 1.1 | 1.2 | 1.1 | TUP1       | 12534656..general transcription repressor                 | orf19.6109  | 4657  | CaTUP1    | TRANSCRIPTION SUBCELLULAR LOCALISATION                             | transcription regulator activity |
| CA3853 | 1.0 | 1.0 | 1.0 | 1.0 | 1.0 | 1.0 | MVD1.3     | 12536361..mevalonate pyrophosph diphosphor                | orf19.6105  | 4652  | CaMVD1.3  | Lipid fatty-acid and isoprenoid metabolism                         | lyase activity                   |
| CA3854 | 1.0 | 1.0 | 1.0 | 1.0 | 1.0 | 1.0 | IPF4649    | complemer unknown Function                                | orf19.6102  | 4649  | IPF4649   | CELL CYCLE AND DNA PROCESSING TRANSCRIPTION                        | transcription regulator activity |
| CA3855 | 1.0 | 0.9 | 1.0 | 1.1 | 1.0 | 0.9 | IPF4645    | 12538088..unknown Function                                | orf19.6103  | 4645  | IPF4645   | UNCLASSIFIED PROTEINS                                              | molecular_function unknown       |
| CA3856 | 1.0 | 1.0 | 1.0 | 1.0 | 1.0 | 1.0 | IPF4641    | complemer similar to Saccharomyces cerevisi               | orf19.6100  | 4641  | IPF4641   | Lipid fatty-acid and isoprenoid metabolism                         | transferase activity             |
| CA3857 | 1.1 | 1.0 | 1.0 | 1.1 | 1.0 | 1.0 | CCT8       | 12539831..component of chapero chaperonin                 | orf19.6099  | 4639  | CaCCT8    | PROTEIN FATE [folding modification destination] ""                 | SUBCELLULAR LOC                  |
| CA3858 | 0.9 | 1.0 | 0.9 | 1.1 | 1.0 | 1.1 | TRP1       | complemer phosphoribosylanthran phosphorib                | orf19.6096  | 4635  | CaTRP1    | Amino acid metabolism SUBCELLULAR LOCALISATION                     | isomerase activity               |
| CA3859 | 1.0 | 0.9 | 1.1 | 1.0 | 1.0 | 1.0 | IPF4632    | complemer similar to Saccharomyces cerevisi               | orf19.6094  | 4632  | IPF4632   | CELLULAR TRANSPORT AND TRANSPORT MECHANISMS SUBCELL                | molecular_function unknown       |
| CA3860 | 1.1 | 1.1 | 1.0 | 1.1 | 1.2 | 1.1 | KEL1       | 12544763..involved in cell fusion and morpho              | orf19.6092  | 4628  | CaKEL1    | REGULATION OF/INTERACTION WITH CELLULAR ENVIRONMENT C              | molecular_function unknown       |
| CA3861 | 1.0 | 1.1 | 1.0 | 1.0 | 1.0 | 1.0 | RIM8       | complemer regulator of PH respon Rim8p [Car               | orf19.6091  | 4622  | CaRIM8    | UNCLASSIFIED PROTEINS                                              |                                  |
| CA3862 | 1.1 | 1.1 | 0.9 | 1.0 | 1.0 | 1.0 | NSR1       | complemer nuclear localization sequence bind              | orf19.6090  | 4616  | CaNSR1    | TRANSCRIPTION ""CELL RESCUE DEFENSE AND VIRULENCE ""               | SUeRNA binding                   |

|        |     |     |     |     |     |     |                            |                                                         |              |                           |                                                                                             |                                       |
|--------|-----|-----|-----|-----|-----|-----|----------------------------|---------------------------------------------------------|--------------|---------------------------|---------------------------------------------------------------------------------------------|---------------------------------------|
| CA3863 | 1.0 | 1.1 | 1.0 | 1.1 | 1.0 | 1.0 | LEU41                      | 12552360..2-isopropylmalate synthase (by homology)      | orf19.6086   | 4611 CaLEU41              | Amino acid metabolism SUBCELLULAR LOCALISATION                                              | transferase activity                  |
| CA3864 | 1.3 | 1.3 | 1.1 | 0.9 | 1.2 | 1.3 | RPL16A                     | 12554335..ribosomal protein (by homology)               | orf19.6085   | 4609 CaRPL16A             | PROTEIN SYNTHESIS SUBCELLULAR LOCALISATION                                                  | RNA binding                           |
| CA3865 | 1.0 | 1.0 | 0.9 | 1.0 | 1.0 | 1.0 | complemer unknown Function | orf19.6084                                              | 4608 IPF4608 | No significant S.c. match |                                                                                             |                                       |
| CA3866 | 1.0 | 1.0 | 1.1 | 1.1 | 1.0 | 1.0 | IPF4606                    | complemer unknown Function                              | orf19.6082   | 4606 IPF4606              | C-compound and carbohydrate metabolism CONTROL OF CELLULAR C                                | molecular_function unknown            |
| CA3867 | 1.1 | 1.0 | 1.1 | 1.1 | 1.1 | 1.0 | PHR2                       | 12560345..pH-regulated protein 2 pH-regulat             | orf19.1350   | 4604 CaPHR2               | Lipid fatty-acid and isoprenoid metabolism ""CONTROL OF CELLULAR C                          | (transferase activity                 |
| CA3868 | 1.0 | 1.0 | 1.1 | 1.0 | 1.0 | 1.0 | CCT1                       | complemer component of chaperonin-containi              | orf19.401    | 8832 CaCCT1               | PROTEIN FATE [folding modification destination] ""SUBCELLULAR LOC                           | chaperone activity                    |
| CA3869 | 1.0 | 0.9 | 1.0 | 1.2 | 1.0 | 1.2 | IPF8831                    | 12568747..unknown function                              | orf19.400    | 8831 IPF8831              | No significant S.c. match                                                                   |                                       |
| CA3870 | 1.0 | 0.9 | 0.9 | 1.0 | 1.1 | 1.1 | YPK1                       | 12570292..ser/thr-specific protein kinase (by           | orf19.399    | 8830 CaYPK1               | CELL CYCLE AND DNA PROCESSING                                                               | protein kinase activity               |
| CA3871 | 0.9 | 1.0 | 1.0 | 1.0 | 1.0 | 1.0 | IPF8828                    | complemer unknown function                              | orf19.398    | 8828 IPF8828              | No significant S.c. match                                                                   |                                       |
| CA3872 | 1.0 | 1.1 | 1.0 | 1.0 | 1.0 | 1.0 | MRPL28                     | 12573281..mitochondrial ribosomal protein of            | orf19.397    | 8826 CaMRPL28             | PROTEIN SYNTHESIS SUBCELLULAR LOCALISATION                                                  | structural molecule activity          |
| CA3873 | 1.0 | 0.9 | 1.1 | 1.0 | 1.0 | 1.0 | IPF8825                    | complemer unknown function                              | orf19.396    | 8825 IPF8825              | UNCLASSIFIED PROTEINS                                                                       | molecular_function unknown            |
| CA3874 | 0.5 | 0.7 | 2.1 | 2.0 | 1.5 | 2.0 | ENO1                       | 12575400..Enolase I (2-phosphoglycerate de              | orf19.395    | 14429 CaENO1              | C-compound and carbohydrate metabolism ENERGY SUBCELLULAR L                                 | lyase activity                        |
| CA3875 | 1.0 | 1.0 | 1.0 | 1.0 | 1.0 | 1.0 | IPF14430                   | complemer putative kynureninase (by homolo              | orf19.8024   | 14430 IPF14430            | Amino acid metabolism ""Metabolism of vitamins cofactors and prostheti                      | hydrolase activity                    |
| CA3876 | 1.0 | 1.0 | 1.0 | 0.9 | 1.0 | 1.0 | APS3                       | 12578650..AP-3 complex subunit, sigma3 sut              | orf19.8023   | 7291 CaAPS3               | CELLULAR TRANSPORT AND TRANSPORT MECHANISMS                                                 | molecular_function unknown            |
| CA3877 | 0.9 | 1.0 | 1.0 | 0.9 | 0.9 | 1.0 | CBP4                       | complemer Ubiquinol--cytochrome-c reducta               | orf19.392    | 7290 CaCBP4               | ENERGY ""PROTEIN FATE [folding modification destination] ""SUBCELL                          | molecular_function unknown            |
| CA3878 | 1.0 | 1.0 | 1.1 | 0.9 | 1.0 | 1.0 | IPF7289                    | 12580573..similar to Saccharomyces cerevisi             | orf19.391    | 7289 IPF7289              | Lipid fatty-acid and isoprenoid metabolism ""TRANSCRIPTION                                  | transcription regulator activity      |
| CA3879 | 1.0 | 1.0 | 0.9 | 0.9 | 1.0 | 1.1 | CDC42                      | 12583487..Cell Division Control cell divisio            | orf19.390    | 7286 CaCDC42              | CELL CYCLE AND DNA PROCESSING CELLULAR COMMUNICATION                                        | signal transducer activity            |
| CA3880 | 1.0 | 1.0 | 1.0 | 1.0 | 1.0 | 1.0 | CAF16                      | complemer ABC ATPase (by homology)                      | orf19.388    | 7283 CaCAF16              | TRANSCRIPTION                                                                               | transporter activity,hydrolase activi |
| CA3881 | 0.9 | 1.1 | 1.1 | 1.0 | 1.0 | 1.0 | GCR3                       | complemer Large subunit of the nu CaGCR3 [C             | orf19.387    | 7281 CaGCR3               | TRANSCRIPTION SUBCELLULAR LOCALISATION                                                      | RNA binding                           |
| CA3882 | 0.8 | 0.9 | 1.0 | 1.1 | 1.0 | 1.1 | IPF7279                    | 12589543..putative cobalamin-dependent hon              | orf19.386    | 7279 IPF7279              | UNCLASSIFIED PROTEINS                                                                       | transferase activity                  |
| CA3883 | 1.0 | 1.0 | 1.0 | 1.1 | 1.0 | 1.1 | GCV2                       | 12591452..Glycine decarboxylase P subunit               | orf19.8015   | 19789 CaGCV2              | Amino acid metabolism SUBCELLULAR LOCALISATION                                              | oxidoreductase activity               |
| CA3884 | 1.0 | 1.0 | 1.1 | 1.0 | 1.0 | 1.0 | IPF6367                    | 12595057..unknown function                              | orf19.8014   | 6367 IPF6367              | UNCLASSIFIED PROTEINS                                                                       | molecular_function unknown            |
| CA3885 | 1.0 | 1.0 | 0.9 | 1.0 | 1.0 | 1.1 | IPF19790                   | 12598744..unknown function                              | orf19.5095   | 19790 IPF19790            | Lipid fatty-acid and isoprenoid metabolism                                                  |                                       |
| CA3886 | 1.0 | 1.0 | 1.0 | 1.0 | 0.9 | 1.0 | IPF12963                   | 12605161..ubiquitin-mediated protein degrad             | orf19.5094   | 12963 IPF12963            | PROTEIN FATE [folding modification destination]                                             |                                       |
| CA3887 | 1.1 | 1.0 | 1.0 | 0.9 | 0.9 | 0.9 | IPF12964                   | complemer similar to Saccharomyces cerevisi             | orf19.5093   | 12964 IPF12964            | CELL CYCLE AND DNA PROCESSING TRANSCRIPTION CONTROL C                                       | protein binding                       |
| CA3888 | 1.0 | 1.0 | 0.9 | 1.0 | 1.0 | 0.9 | IPF12967                   | 12608994..unknown function                              | orf19.5092   | 12967 IPF12967            | No significant S.c. match                                                                   |                                       |
| CA3889 | 1.0 | 1.1 | 1.0 | 0.9 | 1.0 | 1.0 | TAD3                       | complemer tRNA-specific adenosine-34 deam               | orf19.5090   | 12969 CaTAD3              | TRANSCRIPTION                                                                               | hydrolase activity                    |
| CA3890 | 0.9 | 1.0 | 1.0 | 1.1 | 1.0 | 1.1 | TERT2                      | 12610665..telomerase reverse transcriptase              | 2orf19.5089  | 19791 CaTERT2             | CELL CYCLE AND DNA PROCESSING CONTROL OF CELLULAR ORC                                       | DNA binding,nucleotidyltransferas     |
| CA3891 | 1.0 | 0.9 | 0.9 | 1.0 | 1.0 | 0.9 | BUD6                       | complemer bud site selection protein (by hom            | orf19.5087   | 8707 CaBUD6               | CELL FATE SUBCELLULAR LOCALISATION                                                          | protein binding                       |
| CA3892 | 1.0 | 1.0 | 1.0 | 1.0 | 1.0 | 1.0 | PSE1                       | complemer karyopherin-beta protein (by homo             | orf19.5085   | 8712 CaPSE1               | CELLULAR TRANSPORT AND TRANSPORT MECHANISMS SUBCELL                                         | protein binding                       |
| CA3893 | 1.0 | 1.0 | 1.0 | 1.0 | 1.0 | 1.0 | FUN11                      | complemer putative GTP-binding protein (by h            | orf19.5083   | 8715 CaFUN11              | UNCLASSIFIED PROTEINS                                                                       | molecular_function unknown            |
| CA3894 | 1.1 | 1.2 | 1.1 | 1.0 | 1.1 | 1.1 | YIF2                       | 12621274..general translation factor eIF2 hon           | orf19.5081   | 8722 CaYIF2               | PROTEIN SYNTHESIS SUBCELLULAR LOCALISATION                                                  | translation regulator activity        |
| CA3895 | 0.9 | 0.7 | 0.8 | 0.9 | 1.0 | 1.0 | CDR4                       | complemer Multidrug resistance protein                  | orf19.5079   | 10349 CaCDR4              | Lipid fatty-acid and isoprenoid metabolism ""CELL RESCUE DEFENSE AND VIRULENCE ""REGULATIO  |                                       |
| CA3896 | 1.2 | 1.3 | 1.0 | 1.0 | 1.1 | 1.0 | IPF10339                   | complemer unknown function                              | orf19.5077   | 10339 IPF10339            | No significant S.c. match                                                                   |                                       |
| CA3897 | 0.9 | 1.0 | 1.0 | 0.7 | 0.8 | 0.9 | PFY1                       | complemer BINDS TO ACTIN                                | orf19.5076   | 16724 CaPFY1              | CELL FATE SUBCELLULAR LOCALISATION                                                          | protein binding                       |
| CA3898 | 1.0 | 1.0 | 1.1 | 0.9 | 1.1 | 1.0 | UBA2                       | complemer ubiquitin-activating -like enzyme b           | orf19.5074   | 10088 CaUBA2              | TRANSCRIPTION ""PROTEIN FATE [folding modification destination] ""SUBCELLULAR LOCALISATION  |                                       |
| CA3899 | 0.9 | 0.9 | 1.1 | 1.0 | 1.0 | 1.0 | DPM1                       | complemer dolichol-phosphate (beta-D) mann              | orf19.5073   | 10089 CaDPM1              | C-compound and carbohydrate metabolism SUBCELLULAR LOCALISA                                 | transferase activity                  |
| CA3900 | 1.2 | 1.0 | 1.2 | 1.9 | 1.3 | 1.3 | IPF10092                   | complemer unknown function                              | orf19.5071   | 10092 IPF10092            | UNCLASSIFIED PROTEINS                                                                       | molecular_function unknown            |
| CA3901 | 0.9 | 1.0 | 1.0 | 1.1 | 1.0 | 1.0 | IPF3282.3E0C               | 12643207..hexose transporter, 3-prime end (by homology) | orf19.5070   | 14892 IPF3282.3E0C        | C-compound and carbohydrate metabolism CELLULAR TRANSPORT AND TRANSPORT MECHANISMS          |                                       |
| CA3902 | 1.0 | 1.0 | 1.0 | 1.0 | 1.0 | 0.9 | YVH1                       | 12643889..protein tyrosine phosphatase (by              | orf19.4401   | 14891 CaYVH1              | CELL CYCLE AND DNA PROCESSING REGULATION OF/INTERACTIO                                      | protein phosphatase activity          |
| CA3903 | 1.0 | 1.0 | 1.0 | 1.0 | 1.0 | 1.0 | IPF14890                   | complemer unknown function                              | orf19.4400   | 14890 IPF14890            | No significant S.c. match                                                                   |                                       |
| CA3904 | 1.0 | 1.0 | 1.0 | 0.9 | 1.0 | 1.1 | IPF14888                   | complemer unknown function                              | orf19.1187   | 14888 IPF14888            | PROTEIN SYNTHESIS                                                                           | molecular_function unknown            |
| CA3905 | 1.0 | 1.1 | 1.0 | 1.0 | 1.0 | 1.0 | IPF19792                   | complemer unknown function                              | orf19.1187   | 19792 IPF19792            | UNCLASSIFIED PROTEINS                                                                       | molecular_function unknown            |
| CA3906 | 1.1 | 1.1 | 1.0 | 1.0 | 0.9 | 0.9 | IPF20149                   | complemer unknown function                              | orf19.1187   | 20149 IPF20149            | ENERGY                                                                                      | molecular_function unknown            |
| CA3907 | 0.9 | 1.0 | 0.9 | 1.0 | 1.1 | 1.0 | IPF3304                    | 12651099..similar to Saccharomyces cerevisi             | orf19.1187   | 3304 IPF3304              | SUBCELLULAR LOCALISATION                                                                    | protein binding                       |
| CA3908 | 1.1 | 1.0 | 1.0 | 1.1 | 1.0 | 0.9 | IPF3301                    | complemer unknown function                              | orf19.4394   | 3301 IPF3301              | C-compound and carbohydrate metabolism ""PROTEIN FATE [folding modification destination] "" |                                       |
| CA3909 | 2.5 | 7.5 | 0.9 | 0.8 | 1.0 | 1.0 | CIT1.EXON2                 | complemer Citrate synthase, exon 2                      | orf19.4393   | 3299 CaCIT1.ex            | C-compound and carbohydrate metabolism ENERGY SUBCELLULAR L                                 | (transferase activity                 |
| CA3910 | 1.0 | 1.0 | 1.0 | 1.0 | 1.0 | 1.0 | IPF3293                    | complemer unknown function                              | orf19.4392   | 3293 IPF3293              | UNCLASSIFIED PROTEINS                                                                       | molecular_function unknown            |
| CA3911 | 1.0 | 0.9 | 1.0 | 1.0 | 1.1 | 1.1 | IPF3292                    | complemer unknown function                              | orf19.4391   | 3292 IPF3292              | UNCLASSIFIED PROTEINS                                                                       |                                       |
| CA3912 | 1.0 | 1.1 | 1.0 | 1.0 | 1.0 | 0.9 | IPF3288                    | complemer unknown function                              | orf19.4390   | 3288 IPF3288              | No significant S.c. match                                                                   |                                       |
| CA3913 | 0.9 | 0.9 | 1.0 | 1.0 | 1.0 | 1.0 | IPF3283                    | complemer unknown function                              | orf19.4388   | 3283 IPF3283              | TRANSCRIPTION                                                                               | transcription regulator activity      |
| CA3914 | 1.0 | 1.1 | 1.0 | 1.0 | 1.0 | 1.0 | IPF3282                    | complemer hexose transporter (by homology)              | orf19.4386   | 3282 IPF3282              | C-compound and carbohydrate metabolism CELLULAR TRANSPORT AND TRANSPORT MECHANISMS          |                                       |
| CA3915 | 1.0 | 1.0 | 1.0 | 1.2 | 0.9 | 1.0 | IPF3277                    | complemer unknown function                              | orf19.4384   | 3277 IPF3277              | No significant S.c. match                                                                   |                                       |
| CA3916 | 1.0 | 1.0 | 1.0 | 1.0 | 1.0 | 0.9 | IPF3274                    | complemer Unknown function                              | orf19.4383   | 3274 IPF3274              | UNCLASSIFIED PROTEINS                                                                       | molecular_function unknown            |
| CA3917 | 1.0 | 1.0 | 1.0 | 1.3 | 1.2 | 1.0 | IPF3273                    | complemer similar to Saccharomyces cerevisi             | orf19.4382   | 3273 IPF3273              | CELLULAR TRANSPORT AND TRANSPORT MECHANISMS SUBCELL                                         | protein binding                       |
| CA3918 | 1.0 | 1.1 | 1.0 | 1.0 | 1.2 | 1.1 | VTC2                       | complemer putative polyphosphate synthetase             | orf19.4381   | 3271 CaVTC2               | Phosphate metabolism                                                                        | molecular_function unknown            |
| CA3919 | 1.0 | 1.1 | 1.0 | 1.0 | 1.0 | 1.0 | IFC5                       | complemer unknown function                              | orf19.5121   | 9728 CaIFC5               | TRANSPORT FACILITATION                                                                      |                                       |
| CA3920 | 0.9 | 0.6 | 0.9 | 0.9 | 0.7 | 0.8 | SDS24                      | complemer Similar to S. cerevisiae CBS doma             | orf19.5118   | 6359 CaSDS24              | PROTEIN FATE [folding modification destination]                                             | molecular_function unknown            |
| CA3921 | 0.5 | 0.6 | 1.7 | 1.5 | 1.2 | 1.3 | OLE1                       | 12697174..Stearoyl-CoA desaturase fatty acid d          | orf19.5117   | 6353 CaOLE1               | Lipid fatty-acid and isoprenoid metabolism ""SUBCELLULAR LOCALISA                           | oxidoreductase activity               |
| CA3922 | 1.1 | 1.1 | 0.9 | 0.9 | 1.0 | 1.0 | GRD19                      | 12700546..Probable golgi membr:phox doma                | orf19.5114   | 6349 CaGRD19              | PROTEIN FATE [folding modification destination] ""SUBCELLULAR LOC                           | protein binding                       |
| CA3923 | 1.5 | 2.3 | 0.9 | 0.8 | 1.0 | 0.8 | ADH2                       | 12702654..alcohol dehydrogenase I (by homc              | orf19.5113   | 16784 CaADH2              | C-compound and carbohydrate metabolism ENERGY SUBCELLULAR L                                 | oxidoreductase activity               |
| CA3924 | 1.0 | 1.1 | 1.1 | 1.0 | 1.2 | 1.1 | TKL1                       | complemer transketolase 1                               | orf19.5112   | 13260 CaTKL1              | Amino acid metabolism C-compound and carbohydrate metabolism ENE                            | transferase activity                  |
| CA3925 | 1.1 | 1.1 | 1.1 | 1.1 | 1.0 | 1.0 | IPF13257                   | complemer unknown function                              | orf19.5110   | 13257 IPF13257            | No significant S.c. match                                                                   |                                       |
| CA3926 | 1.1 | 1.1 | 1.1 | 1.0 | 1.1 | 0.9 | IPF16198                   | complemer possible regulatory propossible re            | orf19.5107   | 16198 IPF16198            | TRANSCRIPTION                                                                               | RNA binding                           |
| CA3927 | 1.0 | 1.1 | 1.1 | 1.0 | 1.0 | 1.0 | DIP2                       | 12713649..beta transducin                               | orf19.5106   | 14262 CaDIP2              | CELL CYCLE AND DNA PROCESSING                                                               | RNA binding                           |
| CA3928 | 0.9 | 1.0 | 0.9 | 1.1 | 1.0 | 1.0 | GAL11                      | 12719361..DNA-directed RNA polymerase II fo             | orf19.5105   | 12729 CaGAL11             | C-compound and carbohydrate metabolism TRANSCRIPTION CELL FA                                | transcription regulator activity      |
| CA3930 | 1.1 | 1.2 | 1.0 | 1.0 | 0.9 | 1.0 | LPT1.EXON2                 | 12723309..protein-tyrosine-phosph phosphoty             | orf19.5104   | 12722 CaLPT1.ex           | CLASSIFICATION NOT YET CLEAR-CUT                                                            | protein phosphatase activity          |
| CA3931 | 1.0 | 1.0 | 1.0 | 1.0 | 1.0 | 0.9 | IPF12719                   | 12725059..unknown function conserved                    | orf19.5103   | 12719 IPF12719            | ENERGY                                                                                      |                                       |
| CA3932 | 1.0 | 1.0 | 1.0 | 1.0 | 1.0 | 1.0 | IPF20150                   | complemer unknown function                              | orf19.9561   | 20150 IPF20150            | No significant S.c. match                                                                   |                                       |
| CA3933 | 1.0 | 1.0 | 0.9 | 1.0 | 1.0 | 1.0 | IPF18281                   | 12730007..similar to Saccharomyces cerevisi             | orf19.9560   | 18281 IPF18281            | SUBCELLULAR LOCALISATION                                                                    | protein binding                       |
| CA3934 | 0.9 | 1.0 | 1.0 | 0.9 | 1.0 | 1.1 | IPF17119                   | 12731697..unknown function                              | orf19.2008   | 17119 IPF17119            | UNCLASSIFIED PROTEINS                                                                       | molecular_function unknown            |
| CA3935 | 0.9 | 1.0 | 1.0 | 0.9 | 1.0 | 1.0 | IPF14688                   | complemer unknown function                              | orf19.2007   | 14688 IPF14688            | CELLULAR TRANSPORT AND TRANSPORT MECHANISMS SUBCELL                                         | molecular_function unknown            |

|        |     |     |     |     |     |     |              |                                                           |       |            |                                                                                              |                              |
|--------|-----|-----|-----|-----|-----|-----|--------------|-----------------------------------------------------------|-------|------------|----------------------------------------------------------------------------------------------|------------------------------|
| CA3936 | 1.0 | 1.0 | 1.0 | 1.1 | 1.0 | 1.0 | COX17        | 12736721..cysteine-rich cytoplasmic protein(by homology   | 14687 | CaCOX17    | ENERGY ""PROTEIN FATE [folding modification destination] ""REGULA'                           | transporter activity         |
| CA3937 | 1.0 | 0.9 | 1.0 | 1.0 | 1.0 | 1.0 | IPF14686     | complemer unknown function orf19.9557                     | 14686 | IPF14686   | UNCLASSIFIED PROTEINS                                                                        | molecular_function unknown   |
| CA3938 | 0.9 | 0.9 | 0.9 | 1.1 | 1.0 | 1.0 | IPF4764      | complemer unknown Function orf19.9556                     | 4764  | IPF4764    | C-compound and carbohydrate metabolism TRANSCRIPTION SUBCELL                                 | protein phosphatase activity |
| CA3939 | 1.0 | 1.1 | 1.0 | 0.9 | 1.0 | 1.0 | HNM1         | complemer Choline permease (by homology) orf19.9554       | 4757  | CaHNM1     | CELLULAR TRANSPORT AND TRANSPORT MECHANISMS SUBCELLULAR LOCALISATION TRANSP                  |                              |
| CA3940 | 1.1 | 1.0 | 1.1 | 1.0 | 1.0 | 1.0 | NIC96        | 12748259..nuclear pore protein (by homology orf19.9553    | 4755  | CaNIC96    | CELLULAR TRANSPORT AND TRANSPORT MECHANISMS SUBCELL structural molecule activity             |                              |
| CA3941 | 0.9 | 1.0 | 1.1 | 0.9 | 1.0 | 1.0 | IPF4754      | 12751373..unknown Function orf19.2001                     | 4754  | IPF4754    | No significant S.c. match                                                                    |                              |
| CA3942 | 0.9 | 1.0 | 1.0 | 1.0 | 1.1 | 0.9 | CHL1         | complemer protein of the DEAH box family (byorf19.2000    | 4753  | CaCHL1     | CELL CYCLE AND DNA PROCESSING SUBCELLULAR LOCALISATIO DNA binding,helicase activity          |                              |
| CA3943 | 0.9 | 0.9 | 1.0 | 1.0 | 1.0 | 1.0 | IPF4751      | 12754865..unknown Function orf19.1999                     | 4751  | IPF4751    | No significant S.c. match                                                                    |                              |
| CA3944 | 0.9 | 1.0 | 1.0 | 1.1 | 1.0 | 0.9 | IPF4750      | 12755828..unknown Function orf19.1998                     | 4750  | IPF4750    | CELL CYCLE AND DNA PROCESSING                                                                |                              |
| CA3945 | 1.0 | 1.0 | 1.1 | 1.0 | 1.0 | 1.0 | CHA12        | 12758897..L-serine/L-threonine deaminase (borf19.9548     | 4749  | CaCHA12    | Amino acid metabolism                                                                        |                              |
| CA3946 | 0.9 | 0.9 | 1.0 | 1.0 | 1.0 | 1.0 | MNN2         | complemer Golgi alpha-1,2-mannosyltransferaorf19.9547     | 4742  | CaMNN2     | CELL FATE                                                                                    |                              |
| CA3947 | 1.0 | 1.1 | 0.9 | 1.0 | 1.0 | 1.0 | IPF14768     | 12766735..unknown function orf19.1994                     | 14768 | IPF14768   | UNCLASSIFIED PROTEINS                                                                        |                              |
| CA3948 | 0.9 | 1.0 | 1.0 | 1.1 | 1.1 | 1.1 | RPN9         | 12769144..26S proteasome regulatory partickorf19.1993     | 14766 | CaRPN9     | PROTEIN FATE [folding modification destination] ""SUBCELLULAR LOC                            | peptidase activity           |
| CA3949 | 1.0 | 1.1 | 1.0 | 1.0 | 1.0 | 0.9 | SIR21        | complemer regulatory protein (by homology) orf19.9544     | 17303 | CaSIR21    | TRANSCRIPTION CELL FATE                                                                      |                              |
| CA3950 | 1.0 | 1.0 | 0.9 | 1.0 | 1.0 | 1.0 | PTM1         | 12773621..Possibly involved in the TCA cycleorf19.9542    | 19793 | CaPTM1     | ENERGY                                                                                       | molecular_function unknown   |
| CA3951 | 1.0 | 1.0 | 1.0 | 1.1 | 1.1 | 1.0 | VAC7.3       | 12796222..Vacuolar protein, 3-prime end (by orf19.1409    | 6717  | CaVAC7.3   | PROTEIN FATE [folding modification destination] ""SUBCELLULAR LOC                            | enzyme regulator activity    |
| CA3952 | 1.0 | 1.1 | 1.0 | 0.9 | 1.0 | 0.9 | IPF6716      | complemer Phenylacetate 2-hydroxylase (by rorf19.1411     | 6716  | IPF6716    | Lipid fatty-acid and isoprenoid metabolism """"CELL RESCUE DEFENSE AND VIRULENCE ""SUBCELLUL |                              |
| CA3953 | 1.0 | 0.9 | 1.0 | 1.1 | 1.0 | 1.1 | IPF6714      | complement(12800838..12801470) orf19.1412                 | 6714  | IPF6714    | No significant S.c. match                                                                    |                              |
| CA3954 | 1.0 | 1.0 | 1.1 | 0.9 | 1.0 | 1.0 | YFH1         | 12801702..Regulates mitochondrial iron accu orf19.1413    | 6713  | CaYFH1     | REGULATION OF/INTERACTION WITH CELLULAR ENVIRONMENT S enzyme regulator activity              |                              |
| CA3955 | 1.1 | 1.1 | 1.0 | 0.9 | 1.1 | 1.2 | IPF6712.5F   | 12802958..unknown function, 5-prime end orf19.1414        | 6712  | IPF6712.5f | UNCLASSIFIED PROTEINS                                                                        |                              |
| CA3956 | 1.0 | 1.0 | 1.0 | 0.9 | 1.1 | 1.2 | IPF6712.3F   | 12803598..unknown function, 3-prime end                   | 6710  | IPF6712.3f | No significant S.c. match                                                                    |                              |
| CA3957 | 1.0 | 1.0 | 1.0 | 1.2 | 1.1 | 1.1 | RBT2         | complemer Repressed by TUP1 pr repressed lorf19.1415      | 6709  | CaRBT2     | REGULATION OF/INTERACTION WITH CELLULAR ENVIRONMENT Other virulence attributes               |                              |
| CA3958 | 1.0 | 1.0 | 1.1 | 1.0 | 1.0 | 1.0 | COX11        | complemer cytochrome-c oxidase assembly p orf19.1416      | 11240 | CaCOX11    | Metabolism of vitamins cofactors and prosthetic groups """"PROTEIN FA                        | molecular_function unknown   |
| CA3959 | 0.9 | 1.0 | 1.1 | 1.1 | 1.1 | 1.1 | IPF11236.3F  | complemer similar to Saccharomyces cerevisi orf19.1418    | 11238 | IPF11236.3 | CELLULAR TRANSPORT AND TRANSPORT MECHANISMS SUBCELLULAR LOCALISATION                         |                              |
| CA3960 | 1.1 | 1.0 | 1.0 | 1.1 | 1.0 | 1.0 | IPF11236.5F  | complemer similar to Saccharomyces cerevisi orf19.1419    | 11236 | IPF11236.5 | CELLULAR TRANSPORT AND TRANSPORT MECHANISMS SUBCELL protein binding                          |                              |
| CA3961 | 1.0 | 1.0 | 1.0 | 1.0 | 0.9 | 1.0 | IPF11235     | 12814339..unknown function orf19.1420                     | 11235 | IPF11235   | UNCLASSIFIED PROTEINS                                                                        | molecular_function unknown   |
| CA3962 | 1.0 | 1.0 | 1.1 | 1.0 | 1.0 | 1.0 | IPF11234     | complemer similar to saccharomyces cerevisi orf19.1421    | 11234 | IPF11234   | Nitrogen and sulphur metabolism Nucleotide metabolism Purine ribonuc                         | hydrolase activity           |
| CA3963 | 1.0 | 1.1 | 0.9 | 1.0 | 1.1 | 0.9 | IPF11233     | 12816247..similar to Saccharomyces cerevisi orf19.1422    | 11233 | IPF11233   | CONTROL OF CELLULAR ORGANIZATION SUBCELLULAR LOCALIS                                         | hydrolase activity           |
| CA3964 | 0.9 | 0.9 | 1.0 | 1.1 | 1.0 | 1.1 | IPF9370      | complemer unknown function orf19.1424                     | 9370  | IPF9370    | UNCLASSIFIED PROTEINS                                                                        | molecular_function unknown   |
| CA3965 | 1.0 | 0.9 | 1.0 | 0.9 | 0.9 | 1.0 | IPF9375      | 12822546..unknown function orf19.1426                     | 9375  | IPF9375    | UNCLASSIFIED PROTEINS                                                                        |                              |
| CA3966 | 0.9 | 1.1 | 1.0 | 1.0 | 1.0 | 0.9 | IPF9376      | complemer unknown function orf19.1427                     | 9376  | IPF9376    | TRANSPORT FACILITATION                                                                       | transporter activity         |
| CA3967 | 1.0 | 1.1 | 1.0 | 1.0 | 1.0 | 1.0 | IPF9377      | complemer unknown function orf19.1428                     | 9377  | IPF9377    | No significant S.c. match                                                                    |                              |
| CA3968 | 0.8 | 0.9 | 1.1 | 1.0 | 1.0 | 1.1 | IPF9378      | 12827859..similar to Saccharomyces cerevisi orf19.1429    | 9378  | IPF9378    | CELL CYCLE AND DNA PROCESSING TRANSCRIPTION                                                  | molecular_function unknown   |
| CA3969 | 1.0 | 1.0 | 1.0 | 1.0 | 1.0 | 1.0 | IPF9379      | 12829925..unknown function orf19.1430                     | 9379  | IPF9379    | No significant S.c. match                                                                    |                              |
| CA3970 | 0.9 | 1.0 | 1.0 | 1.1 | 1.1 | 1.1 | IPF6497      | complemer unknown function orf19.1542                     | 6497  | IPF6497    | C-compound and carbohydrate metabolism                                                       | DNA binding                  |
| CA3971 | 0.9 | 1.0 | 0.9 | 0.9 | 1.0 | 1.0 | IPF6498      | complemer unknown function orf19.1543                     | 6498  | IPF6498    | No significant S.c. match                                                                    |                              |
| CA3972 | 1.0 | 1.0 | 1.0 | 1.0 | 1.0 | 1.1 | IPF6504      | 12839665..unknown function orf19.9118                     | 6504  | IPF6504    | UNCLASSIFIED PROTEINS                                                                        | molecular_function unknown   |
| CA3973 | 1.0 | 1.0 | 0.9 | 1.0 | 1.0 | 1.0 | IPF6505      | complemer unknown function orf19.1545                     | 6505  | IPF6505    | UNCLASSIFIED PROTEINS                                                                        | molecular_function unknown   |
| CA3974 | 1.0 | 1.0 | 1.0 | 0.9 | 1.0 | 0.9 | IPF6507      | 12841350..unknown function orf19.1546                     | 6507  | IPF6507    | UNCLASSIFIED PROTEINS                                                                        | molecular_function unknown   |
| CA3975 | 0.9 | 0.9 | 1.0 | 0.9 | 1.0 | 1.0 | IPF20152     | complemer unknown function orf19.1547                     | 20152 | IPF20152   | UNCLASSIFIED PROTEINS                                                                        | molecular_function unknown   |
| CA3976 | 0.9 | 1.0 | 1.0 | 1.0 | 1.0 | 1.0 | SNU23        | 12843206..RNA binding zinc finger protein (byorf19.1548   | 15310 | CaSNU23    | TRANSCRIPTION                                                                                | RNA binding                  |
| CA3977 | 1.1 | 1.0 | 1.0 | 1.0 | 1.1 | 1.0 | IPF20153     | 12844359..unknown function orf19.1549                     | 20153 | IPF20153   | No significant S.c. match                                                                    |                              |
| CA3978 | 1.1 | 1.1 | 0.9 | 1.0 | 0.9 | 1.0 | CPR3         | complemer cyclophilin (peptidylprolyl isomer asorf19.1552 | 20154 | CaCPR3     | PROTEIN FATE [folding modification destination] ""SUBCELLULAR LOCALISATION                   |                              |
| CA3979 | 1.0 | 1.1 | 1.1 | 1.0 | 1.0 | 1.2 | ENT3.3F      | complemer putative endocytosis and cytoskelorf19.1553     | 7127  | CaENT3.3f  | SUBCELLULAR LOCALISATION                                                                     | protein binding              |
| CA3982 | 1.1 | 1.0 | 1.0 | 0.9 | 1.0 | 1.0 | SAC3         | complemer Leucine permease transcriptional rorf19.9129    | 7130  | CaSAC3     | Amino acid metabolism TRANSCRIPTION SUBCELLULAR LOCALISAT                                    | protein binding              |
| CA3983 | 1.1 | 1.0 | 0.9 | 1.2 | 1.0 | 1.0 | IPF7133.3    | complemer unknown function, 3-prime end orf19.9130        | 7133  | IPF7133.3  | UNCLASSIFIED PROTEINS                                                                        | molecular_function unknown   |
| CA3984 | 1.0 | 0.9 | 1.0 | 1.0 | 1.0 | 1.1 | HOM2         | complemer Aspartate-semialdehyde dehydrog orf19.9132      | 7136  | CaHOM2     | Amino acid metabolism                                                                        | oxidoreductase activity      |
| CA3985 | 1.0 | 1.0 | 1.0 | 1.0 | 1.0 | 1.1 | POB3         | 12855324..Binds DNA polymerase delta (by horf19.1560      | 7138  | CaPOB3     | CELL CYCLE AND DNA PROCESSING TRANSCRIPTION SUBCELLUL                                        | DNA binding                  |
| CA3986 | 0.7 | 0.6 | 0.6 | 0.8 | 0.9 | 0.5 | IPF7141      | 12858766..unknown function hypothetica orf19.1562         | 7141  | IPF7141    | No significant S.c. match                                                                    |                              |
| CA3987 | 1.0 | 1.0 | 1.1 | 1.0 | 1.0 | 1.0 | ECM3         | 12860734..Involved in cell wall biogenesis anorf19.1563   | 7144  | CaECM3     | CONTROL OF CELLULAR ORGANIZATION                                                             | hydrolase activity           |
| CA3988 | 1.1 | 1.1 | 1.1 | 1.1 | 1.1 | 1.1 | IPF7145      | 12862774..unknown function orf19.1564                     | 7145  | IPF7145    | UNCLASSIFIED PROTEINS                                                                        | molecular_function unknown   |
| CA3989 | 0.9 | 0.9 | 1.0 | 1.0 | 1.0 | 1.0 | IPF7147      | complemer unknown function orf19.1565                     | 7147  | IPF7147    | UNCLASSIFIED PROTEINS                                                                        |                              |
| CA3990 | 0.9 | 1.1 | 1.0 | 1.0 | 1.0 | 1.0 | IPF14782     | 12865488..beta-transducin (by homology) orf19.1566        | 14782 | IPF14782   | CLASSIFICATION NOT YET CLEAR-CUT                                                             | molecular_function unknown   |
| CA3991 | 1.0 | 0.9 | 1.0 | 1.0 | 1.1 | 1.1 | VAM6.5F      | 12868640..Vacuolar carboxypeptidase Y, 5-prorf19.1567     | 14783 | CaVAM6.5   | No significant S.c. match                                                                    |                              |
| CA3992 | 1.1 | 1.0 | 1.1 | 1.0 | 1.0 | 1.0 | VAM6.3F      | 12870299..Vacuolar carboxypeptidase Y, 3-prorf19.1568     | 19794 | CaVAM6.3   | PROTEIN FATE [folding modification destination] ""SUBCELLULAR LOC                            | enzyme regulator activity    |
| CA3993 | 1.0 | 1.0 | 1.1 | 1.0 | 1.0 | 1.0 | IPF8275      | complemer unknown function orf19.9142                     | 8275  | IPF8275    | UNCLASSIFIED PROTEINS                                                                        | molecular_function unknown   |
| CA3994 | 1.1 | 1.1 | 1.0 | 1.0 | 1.0 | 1.0 | ERG7         | 12875947..lanosterol synthase orf19.9143                  | 8270  | CaERG7     | Lipid fatty-acid and isoprenoid metabolism ""TRANSCRIPTION                                   | isomerase activity           |
| CA3995 | 1.0 | 1.0 | 1.0 | 1.0 | 1.0 | 1.0 | IPF11615.3EC | 12879487..RNA-binding protein (by homology)               | 10438 | IPF11615.3 | CLASSIFICATION NOT YET CLEAR-CUT                                                             |                              |
| CA3996 | 0.9 | 1.0 | 0.9 | 1.0 | 0.9 | 1.1 | IPF10440     | 12879925..unknown function orf19.1643                     | 10440 | IPF10440   | UNCLASSIFIED PROTEINS                                                                        | peptidase activity           |
| CA3997 | 1.0 | 1.0 | 1.0 | 1.1 | 1.0 | 1.0 | LOC1         | complemer putative double-stranded RNA-binorf19.1642      | 10442 | CaLOC1     | UNCLASSIFIED PROTEINS                                                                        | RNA binding                  |
| CA3998 | 1.1 | 1.0 | 1.1 | 1.0 | 1.0 | 1.0 | IPF10443     | 12882405..formamidase-like protein (by homc orf19.1641    | 10443 | IPF10443   | No significant S.c. match                                                                    |                              |
| CA3999 | 1.0 | 0.8 | 1.1 | 1.1 | 0.9 | 1.0 | IPF10447     | complemer unknown function orf19.1637                     | 10447 | IPF10447   | No significant S.c. match                                                                    |                              |
| CA4000 | 1.1 | 1.0 | 1.0 | 1.1 | 1.1 | 1.1 | IPF4262      | 12890326..similar to Saccharomyces cerevisi orf19.1636    | 4262  | IPF4262    | REGULATION OF/INTERACTION WITH CELLULAR ENVIRONMENT C enzyme regulator activity              |                              |
| CA4001 | 1.1 | 1.3 | 0.7 | 1.1 | 0.9 | 0.9 | RPL12        | 12892036..ribosomal protein orf19.1635                    | 4260  | CaRPL12    | PROTEIN SYNTHESIS SUBCELLULAR LOCALISATION                                                   | structural molecule activity |
| CA4002 | 1.0 | 1.0 | 1.0 | 1.0 | 1.1 | 0.9 | IPF4258      | 12893635..unknown function orf19.1634                     | 4258  | IPF4258    | Lipid fatty-acid and isoprenoid metabolism                                                   |                              |
| CA4003 | 1.0 | 0.9 | 1.0 | 1.1 | 1.0 | 1.0 | IPF4257      | 12895133..unknown function orf19.1633                     | 4257  | IPF4257    | UNCLASSIFIED PROTEINS                                                                        | RNA binding                  |
| CA4004 | 1.0 | 0.9 | 1.0 | 0.9 | 1.0 | 1.0 | IPF4256      | complemer unknown function orf19.1632                     | 4256  | IPF4256    | UNCLASSIFIED PROTEINS                                                                        |                              |
| CA4005 | 0.9 | 1.1 | 1.1 | 1.0 | 1.0 | 1.0 | ERG6         | complemer sterol transmethyase sterol trans orf19.1631    | 4255  | CaERG6     | Lipid fatty-acid and isoprenoid metabolism ""SUBCELLULAR LOCALISA'                           | transferase activity         |
| CA4006 | 1.0 | 1.0 | 0.9 | 1.0 | 1.0 | 1.1 | IPF4253      | complemer unknown function orf19.1630                     | 4253  | IPF4253    | TRANSCRIPTION                                                                                | molecular_function unknown   |
| CA4007 | 1.0 | 1.0 | 1.0 | 0.9 | 0.9 | 1.1 | LAP41        | complemer aminopeptidase ysc precursor (byorf19.1628      | 4250  | CaLAP41    | PROTEIN FATE [folding modification destination] ""SUBCELLULAR LOC                            | peptidase activity           |
| CA4008 | 0.9 | 1.0 | 1.0 | 1.1 | 1.0 | 1.0 | DYS1         | complemer deoxyhypusine synthase orf19.1626               | 4248  | CaDYS1     | Amino acid metabolism                                                                        | transferase activity         |
| CA4009 | 1.0 | 0.9 | 1.0 | 1.0 | 1.1 | 1.0 | IPF4247      | complemer unknown function orf19.1625                     | 4247  | IPF4247    | No significant S.c. match                                                                    |                              |

|        |     |     |     |     |     |     |              |                                                |             |            |            |                                                                                    |                                                      |                 |
|--------|-----|-----|-----|-----|-----|-----|--------------|------------------------------------------------|-------------|------------|------------|------------------------------------------------------------------------------------|------------------------------------------------------|-----------------|
| CA4010 | 1.0 | 1.0 | 1.0 | 1.0 | 1.0 | 1.0 | MAK10.3      | complemer glucose-repressible protein, 3-prirr | orf19.1624  | 4245       | CaMAK10.   | ENERGY                                                                             | transferase activity                                 |                 |
| CA4011 | 1.0 | 1.0 | 1.0 | 0.9 | 1.1 | 1.0 | IPF4240      | complemer similar to Saccharomycunnamed porf   | orf19.1622  | 4240       | IPF4240    | CELL CYCLE AND DNA PROCESSING                                                      | molecular_function unknown                           |                 |
| CA4012 | 1.0 | 0.9 | 1.0 | 1.0 | 1.2 | 1.0 | GPA2         | complemer nucleotide-binding regulatory prote  | orf19.1621  | 4239       | CaGPA2     | CELLULAR COMMUNICATION/SIGNAL TRANSDUCTION MECHANISM                               | hydrolase activity                                   |                 |
| CA4013 | 0.9 | 0.9 | 0.9 | 1.0 | 0.9 | 1.0 | IPF4234      | complemer unknown function                     | orf19.1620  | 4234       | IPF4234    | No significant S.c. match                                                          |                                                      |                 |
| CA4014 | 1.0 | 1.0 | 1.1 | 1.2 | 1.2 | 1.2 | CTK1         | complemer probable cell division protein kinas | orf19.1619  | 4233       | CaCTK1     | TRANSCRIPTION SUBCELLULAR LOCALISATION                                             | protein kinase activity                              |                 |
| CA4015 | 1.0 | 1.0 | 1.1 | 1.1 | 0.9 | 0.9 | IPF12268     | 12926743..unknown function                     |             | 12268      | IPF12268   | No significant S.c. match                                                          |                                                      |                 |
| CA4016 | 1.1 | 1.1 | 0.9 | 1.0 | 0.9 | 1.0 | GFA1         | complemer glutamine:fructose-6-p glucosamin    | orf19.1618  | 12267      | CaGFA1     | C-compound and carbohydrate metabolism CELL FATE SUBCELLULAR                       | transferase activity                                 |                 |
| CA4017 | 1.1 | 0.9 | 1.1 | 1.0 | 1.0 | 1.0 | PBN1         | 12937376..protease by homology                 | orf19.3447  | 5328       | CaPBN1     | PROTEIN FATE [folding modification destination] ""SUBCELLULAR LOC                  | molecular_function unknown                           |                 |
| CA4018 | 1.1 | 1.1 | 0.9 | 1.0 | 1.0 | 0.9 | MOG1         | complemer Ran-Binding Protein by homology      | orf19.3446  | 5327       | CaMOG1     | PROTEIN FATE [folding modification destination] ""CELLULAR TRANSP                  | protein binding                                      |                 |
| CA4019 | 1.1 | 0.9 | 1.0 | 1.0 | 1.0 | 1.0 | HOC1         | 12939834..GLYCOSYLTRANSFERASE by hcorf         | orf19.3445  | 5326       | CaHOC1     | C-compound and carbohydrate metabolism ""PROTEIN FATE [folding m                   | transferase activity                                 |                 |
| CA4020 | 0.9 | 1.0 | 1.0 | 1.0 | 0.9 | 1.0 | IPF5324      | 12942128..putative transporter (by homology)   | orf19.3444  | 5324       | IPF5324    | CELL RESCUE DEFENSE AND VIRULENCE ""TRANSPORT FACILITATION                         |                                                      |                 |
| CA4021 | 1.0 | 1.1 | 1.0 | 1.0 | 1.0 | 1.0 | EBP2         | complemer NADPH dehydrogenase (by homo         | orf19.3442  | 5322       | CaEBP2     | ENERGY                                                                             |                                                      |                 |
| CA4022 | 0.9 | 0.9 | 1.0 | 0.9 | 0.9 | 1.1 | FRP6         | complemer member of the FRP family of prote    | orf19.3441  | 5321       | CaFRP6     | C-compound and carbohydrate metabolism                                             |                                                      |                 |
| CA4023 | 1.0 | 1.0 | 1.0 | 1.0 | 1.0 | 1.0 | FRP5         | complemer member of the FRP family of prote    | orf19.3440  | 7185       | CaFRP5     | C-compound and carbohydrate metabolism                                             |                                                      |                 |
| CA4024 | 1.1 | 1.1 | 1.0 | 1.0 | 1.0 | 1.0 | IPF7182      | complemer unknown function                     | orf19.3439  | 7182       | IPF7182    | No significant S.c. match                                                          |                                                      |                 |
| CA4025 | 1.0 | 1.0 | 1.0 | 0.9 | 1.0 | 1.0 | SCJ1         | complemer Mitochondrial and ER import prote    | orf19.3438  | 7178       | CaSCJ1     | PROTEIN FATE [folding modification destination] ""SUBCELLULAR LOC                  | chaperone activity                                   |                 |
| CA4026 | 1.1 | 1.0 | 0.9 | 1.0 | 1.0 | 1.0 | IPF7175      | 12957963..unknown function                     | orf19.3437  | 7175       | IPF7175    | No significant S.c. match                                                          |                                                      |                 |
| CA4027 | 1.0 | 1.0 | 1.0 | 1.0 | 1.1 | 1.0 | IPF7174      | 12960250..unknown function                     | orf19.3436  | 7174       | IPF7174    | CELL FATE SUBCELLULAR LOCALISATION PROTEIN ACTIVITY REGULATION                     |                                                      |                 |
| CA4028 | 1.1 | 1.1 | 1.0 | 0.9 | 1.0 | 1.0 | IPF7171.3F   | complemer unknown function, 3-prime end        | orf19.3435  | 7173       | IPF7171.3f | No significant S.c. match                                                          |                                                      |                 |
| CA4029 | 1.0 | 1.0 | 1.0 | 1.0 | 1.0 | 1.0 | IPF7171.5F   | complemer unknown function, 5-prime end        | orf19.3434  | 7171       | IPF7171.5f | TRANSCRIPTION                                                                      | molecular_function unknown                           |                 |
| CA4030 | 0.9 | 1.0 | 0.9 | 1.1 | 0.9 | 1.0 | EBP4         | 12968102..NADPH dehydrogenase (by homo         | orf19.3433  | 19548      | CaEBP4     | ENERGY                                                                             | transporter activity                                 |                 |
| CA4031 | 0.9 | 1.0 | 1.0 | 1.0 | 1.0 | 1.0 | IPF11077     | 12970024..membrane transporter (by homolo      | orf19.3432  | 11077      | IPF11077   | CELL RESCUE DEFENSE AND VIRULENCE ""TRANSPORT FACILITATION                         |                                                      |                 |
| CA4032 | 1.0 | 1.1 | 1.0 | 1.2 | 0.9 | 1.0 | IPF11081     | 12975776..unknown function                     |             | 11081      | IPF11081   | No significant S.c. match                                                          |                                                      |                 |
| CA4033 | 0.9 | 0.9 | 1.0 | 1.0 | 1.0 | 1.0 | IPF19795     | complemer similar to Saccharomyces cerevisi    | orf19.3431  | 19795      | IPF19795   | CELL CYCLE AND DNA PROCESSING SUBCELLULAR LOCALISATIO                              | nucleotidyltransferase activity                      |                 |
| CA4034 | 0.8 | 0.9 | 1.0 | 0.9 | 1.0 | 0.9 | HSP31        | 12983964..heat shock protein (by homology)     | orf19.1114  | 12039      | CaHSP31    | CELL RESCUE DEFENSE AND VIRULENCE ""REGULATION OF/INTERACTION WITH CELLULAR ENV    |                                                      |                 |
| CA4035 | 1.1 | 1.0 | 1.0 | 0.9 | 1.0 | 1.0 | IPF12040     | 12985492..unknown function                     | orf19.3665  | 12040      | IPF12040   | UNCLASSIFIED PROTEINS                                                              | molecular_function unknown                           |                 |
| CA4036 | 0.9 | 1.0 | 1.0 | 1.0 | 1.0 | 1.0 | IPF12042     | complemer unknown function                     | orf19.3666  | 12042      | IPF12042   | UNCLASSIFIED PROTEINS                                                              | molecular_function unknown                           |                 |
| CA4037 | 1.0 | 1.0 | 1.0 | 0.9 | 1.0 | 1.0 | KIP31        | 12988346..kinesin-related protein required for | orf19.3667  | 12044      | CaKIP31    | CELL CYCLE AND DNA PROCESSING CELLULAR TRANSPORT AND TRANSPORT MECHANISMS SUE      |                                                      |                 |
| CA4038 | 1.0 | 1.0 | 0.9 | 0.9 | 0.9 | 1.0 | HGT12        | complemer hexose transporter                   | orf19.3668  | 5315       | CaHGT12    | C-compound and carbohydrate metabolism TRANSPORT FACILITATION                      |                                                      |                 |
| CA4039 | 1.0 | 1.0 | 1.0 | 1.0 | 1.0 | 1.0 | SKS1         | complemer serine/threonine kinase by homolo    | orf19.3669  | 5304       | CaSKS1     | C-compound and carbohydrate metabolism                                             | protein kinase activity                              |                 |
| CA4040 | 1.0 | 0.9 | 0.9 | 0.9 | 1.0 | 1.0 | GAL1         | complemer galactokinase                        | galactokina | orf19.3670 | 5296       | CaGAL1                                                                             | C-compound and carbohydrate metabolism TRANSCRIPTION | protein binding |
| CA4041 | 0.9 | 0.7 | 0.9 | 0.9 | 0.9 | 0.9 | GAL10        | 13008284..UDP-glucose 4-epimerase by homor     | orf19.3672  | 5294       | CaGAL10    | C-compound and carbohydrate metabolism SUBCELLULAR LOCALISA1                       | molecular_function unknown                           |                 |
| CA4042 | 0.9 | 0.9 | 0.9 | 0.9 | 0.9 | 0.9 | TRS23        | 13010516..targeting and fusion of ER to golgi  | orf19.3673  | 5292       | CaTRS23    | CELLULAR TRANSPORT AND TRANSPORT MECHANISMS SUBCELL                                | molecular_function unknown                           |                 |
| CA4043 | 1.0 | 0.9 | 1.0 | 1.0 | 1.0 | 1.0 | IPF5291      | complemer UDP-glucose 4-epimerase (by hor      | orf19.3674  | 5291       | IPF5291    | C-compound and carbohydrate metabolism SUBCELLULAR LOCALISATION                    |                                                      |                 |
| CA4044 | 1.0 | 1.0 | 1.0 | 1.0 | 1.1 | 1.0 | GAL7         | 13012925..UDP-glucose-hexose-1-phosphate       | orf19.3675  | 9203       | CaGAL7     | C-compound and carbohydrate metabolism SUBCELLULAR LOCALISATION                    |                                                      |                 |
| CA4045 | 1.1 | 0.9 | 1.0 | 1.0 | 1.1 | 1.0 | ABP140       | 13014486..putative methyltransferase (by hor   | orf19.3676  | 9204       | CaABP140   | UNCLASSIFIED PROTEINS                                                              |                                                      |                 |
| CA4046 | 0.9 | 1.0 | 1.1 | 1.1 | 1.0 | 1.0 | IPF9205      | complemer similar to Saccharomyces cerevisi    | orf19.3677  | 9205       | IPF9205    | PROTEIN FATE [folding modification destination] ""CONTROL OF CELL                  | molecular_function unknown                           |                 |
| CA4047 | 1.0 | 0.9 | 0.9 | 1.0 | 1.0 | 1.0 | IPF9206      | 13017190..unknown function                     | orf19.3678  | 9206       | IPF9206    | No significant S.c. match                                                          |                                                      |                 |
| CA4048 | 1.0 | 1.0 | 1.0 | 1.1 | 1.1 | 1.1 | IPF9207      | complemer unknown function                     | orf19.1116  | 9207       | IPF9207    | UNCLASSIFIED PROTEINS                                                              | molecular_function unknown                           |                 |
| CA4049 | 0.9 | 1.0 | 1.0 | 1.1 | 1.0 | 1.0 | IPF10482.EXC | 13024198..unknown function, exon 1             | orf19.8054  | 10482      | IPF10482.ε | CELL RESCUE DEFENSE AND VIRULENCE ""REGULATION OF/INTERACTION WITH CELLULAR ENV    |                                                      |                 |
| CA4050 | 1.1 | 1.1 | 1.1 | 1.0 | 0.9 | 1.0 | IPF10482.EXC | 13024939..unknown function, exon 2             | orf19.425   | 20007      | IPF10482.ε | UNCLASSIFIED PROTEINS                                                              | molecular_function unknown                           |                 |
| CA4051 | 1.0 | 1.0 | 1.0 | 1.0 | 1.1 | 0.9 | IPF10231.EXC | 13025769..similar to Saccharomyces cerevisi    | orf19.426   | 10233      | IPF10231.ε | CELL CYCLE AND DNA PROCESSING TRANSCRIPTION SUBCELLULAR LOCALISATION               |                                                      |                 |
| CA4052 | 1.0 | 1.0 | 1.1 | 1.1 | 1.0 | 0.9 | IPF10231.EXC | 13027896..similar to Saccharomyces cerevisi    | orf19.427   | 10231      | IPF10231.ε | TRANSCRIPTION SUBCELLULAR LOCALISATION                                             | molecular_function unknown                           |                 |
| CA4053 | 1.0 | 1.0 | 1.1 | 0.9 | 1.0 | 1.0 | IKS1         | 13033171..PROBABLE SERINE/THREONIN             | orf19.428   | 7725       | CaIKS1     | UNCLASSIFIED PROTEINS                                                              | molecular_function unknown                           |                 |
| CA4054 | 1.0 | 1.1 | 1.0 | 1.1 | 1.0 | 1.0 | TRF4         | 13035598..Topoisomerase I-related protein      | orf19.429   | 7724       | CaTRF4     | CELL CYCLE AND DNA PROCESSING SUBCELLULAR LOCALISATIO                              | nucleotidyltransferase activity                      |                 |
| CA4055 | 1.1 | 1.0 | 1.0 | 0.9 | 0.9 | 0.9 | YPT522       | complemer GTP-binding protein of the rab fam   | orf19.430   | 7723       | CaYPT522   | CELLULAR TRANSPORT AND TRANSPORT MECHANISMS SUBCELLULAR LOCALISATION               |                                                      |                 |
| CA4056 | 0.9 | 0.9 | 0.9 | 1.1 | 1.0 | 1.0 | IPF7721      | 13039034..unknown function                     | orf19.431   | 7721       | IPF7721    | Amino acid metabolism TRANSCRIPTION SUBCELLULAR LOCALISATION UNCLASSIFIED PROTEINS |                                                      |                 |
| CA4057 | 0.9 | 0.9 | 1.0 | 1.0 | 1.0 | 1.0 | IPF7719      | 13041664..unknown function                     | orf19.432   | 7719       | IPF7719    | UNCLASSIFIED PROTEINS                                                              | protein binding                                      |                 |
| CA4058 | 0.9 | 1.0 | 1.1 | 1.1 | 1.0 | 1.1 | IPF7717      | 13043295..unknown function                     | orf19.8063  | 7717       | IPF7717    | C-compound and carbohydrate metabolism CELLULAR TRANSPORT A1                       | molecular_function unknown                           |                 |
| CA4059 | 1.0 | 0.9 | 1.0 | 1.1 | 1.1 | 1.4 | PRD1         | 13045920..Proteinase (by homology)             | orf19.8064  | 5940       | CaPRD1     | PROTEIN FATE [folding modification destination] ""SUBCELLULAR LOC                  | peptidase activity                                   |                 |
| CA4060 | 1.0 | 1.0 | 1.0 | 1.1 | 1.1 | 1.0 | GRS1         | complemer glycine-tRNA ligase (by homology)    | orf19.437   | 5937       | CaGRS1     | PROTEIN SYNTHESIS SUBCELLULAR LOCALISATION                                         | ligase activity                                      |                 |
| CA4061 | 1.0 | 1.0 | 1.0 | 0.9 | 1.1 | 0.9 | IPF5935      | complemer Unknown function                     | orf19.438   | 5935       | IPF5935    | UNCLASSIFIED PROTEINS                                                              | molecular_function unknown                           |                 |
| CA4062 | 0.9 | 1.0 | 1.0 | 1.0 | 1.1 | 1.0 | IPF5933      | 13052447..similar to Saccharomyces cerevisi    | orf19.439   | 5933       | IPF5933    | CELL CYCLE AND DNA PROCESSING                                                      | transcription regulator activity                     |                 |
| CA4063 | 1.0 | 1.1 | 1.0 | 1.0 | 1.0 | 1.0 | SDH11        | 13053735..Succinate dehydrogenase (by hon      | orf19.440   | 5931       | CaSDH11    | C-compound and carbohydrate metabolism ENERGY SUBCELLULAR L                        | oxidoreductase activity                              |                 |
| CA4064 | 1.0 | 1.0 | 1.0 | 1.0 | 1.1 | 1.0 | RPT1         | 13055941..26S PROTEASE REGULATORY              | orf19.441   | 5928       | CaRPT1     | CELL CYCLE AND DNA PROCESSING ""PROTEIN FATE [folding modifi                       | peptidase activity                                   |                 |
| CA4065 | 1.0 | 1.0 | 1.0 | 1.0 | 1.1 | 1.0 | RPC25        | complemer DNA-direcded RNA polymerase III      | orf19.443   | 5926       | CaRPC25    | TRANSCRIPTION SUBCELLULAR LOCALISATION                                             | nucleotidyltransferase activity                      |                 |
| CA4066 | 1.0 | 1.0 | 1.0 | 1.0 | 1.0 | 1.0 | IPF5925      | 13058238..RNA-binding protein (by homology)    | orf19.444   | 5925       | IPF5925    | TRANSCRIPTION SUBCELLULAR LOCALISATION                                             |                                                      |                 |
| CA4067 | 1.0 | 1.0 | 1.0 | 1.0 | 0.9 | 1.0 | IPF5924      | 13058888..unknown function                     | orf19.445   | 5924       | IPF5924    | UNCLASSIFIED PROTEINS                                                              | molecular_function unknown                           |                 |
| CA4068 | 1.0 | 1.0 | 1.0 | 0.9 | 0.9 | 1.0 | IPF5922      | 13061155..unknown function                     | orf19.446   | 5922       | IPF5922    | No significant S.c. match                                                          |                                                      |                 |
| CA4069 |     |     |     |     |     |     | MHP1         | 13066468..13068705                             |             |            |            |                                                                                    |                                                      |                 |
| CA4070 | 1.0 | 1.0 | 1.0 | 1.0 | 0.9 | 0.9 | IPF2562      | complemer unknown function                     | orf19.6623  | 2562       | IPF2562    | UNCLASSIFIED PROTEINS                                                              | molecular_function unknown                           |                 |
| CA4071 | 1.0 | 1.1 | 1.1 | 1.2 | 1.1 | 1.0 | IPF2561      | complemer unknown function                     | orf19.6624  | 2561       | IPF2561    | CELLULAR TRANSPORT AND TRANSPORT MECHANISMS                                        | enzyme regulator activity                            |                 |
| CA4072 | 1.0 | 1.0 | 1.0 | 0.9 | 1.0 | 1.0 | IPF2560      | 13071318..unknown function                     | orf19.6625  | 2560       | IPF2560    | CELL CYCLE AND DNA PROCESSING                                                      | molecular_function unknown                           |                 |
| CA4073 | 1.0 | 1.0 | 1.0 | 1.0 | 1.0 | 1.0 | IPF2559.3    | complemer unknown function, 3-prime end        | orf19.6626  | 2559       | IPF2559.3  | No significant S.c. match                                                          |                                                      |                 |
| CA4074 | 1.0 | 1.0 | 1.0 | 0.9 | 1.0 | 1.0 | IPF2557      | complemer unknown function                     | orf19.6627  | 2557       | IPF2557    | UNCLASSIFIED PROTEINS                                                              | molecular_function unknown                           |                 |
| CA4075 | 1.0 | 1.0 | 1.0 | 1.0 | 0.9 | 1.0 | IPF2555      | complemer unknown function                     | orf19.6628  | 2555       | IPF2555    | SUBCELLULAR LOCALISATION                                                           |                                                      |                 |
| CA4076 | 1.0 | 1.0 | 0.9 | 1.0 | 1.0 | 1.0 | IPF2542      | 13075857..putative neutral sphingomyelinase    | orf19.6629  | 2542       | IPF2542    | Lipid fatty-acid and isoprenoid metabolism ""CELLULAR COMMUNICATI                  | hydrolase activity                                   |                 |
| CA4077 | 1.0 | 1.0 | 1.0 | 1.0 | 1.1 | 0.9 | ACO2         | 13079616..aconitate hydratase (by homology)    | orf19.6632  | 2530       | CaACO2     | ENERGY                                                                             | lyase activity                                       |                 |
| CA4078 | 1.0 | 1.1 | 1.2 | 0.9 | 1.1 | 1.1 | VMA2         | complemer H+-transporting ATPase (by homo      | orf19.6634  | 2528       | CaVMA2     | CELLULAR TRANSPORT AND TRANSPORT MECHANISMS REGULA1                                | transporter activity                                 |                 |
| CA4079 | 0.9 | 1.0 | 1.0 | 1.0 | 1.1 | 1.0 | IPF2527      | complemer unknown function                     | orf19.6635  | 2527       | IPF2527    | No significant S.c. match                                                          |                                                      |                 |
| CA4080 | 0.9 | 1.0 | 1.0 | 1.0 | 1.0 | 1.0 | IPF2524      | 13085887..unknown function                     | orf19.6636  | 2524       | IPF2524    | UNCLASSIFIED PROTEINS                                                              | molecular_function unknown                           |                 |
| CA4081 | 1.0 | 1.1 | 1.0 | 1.0 | 1.1 | 1.0 | IPF2523      | complemer unknown function                     | orf19.6637  | 2523       | IPF2523    | No significant S.c. match                                                          |                                                      |                 |

|        |     |     |     |     |     |     |           |                                                                  |       |           |                                                                                             |                                    |
|--------|-----|-----|-----|-----|-----|-----|-----------|------------------------------------------------------------------|-------|-----------|---------------------------------------------------------------------------------------------|------------------------------------|
| CA4082 | 1.0 | 1.0 | 1.0 | 1.0 | 1.0 | 0.9 | PTC4      | 13089027..ser/thr protein phosphatase PP2C orf19.6638            | 15571 | CaPTC4    | CLASSIFICATION NOT YET CLEAR-CUT                                                            | protein phosphatase activity       |
| CA4083 | 1.1 | 1.1 | 0.9 | 0.9 | 1.1 | 1.0 | IPF5018   | 13091134..unknown function orf19.6639                            | 5018  | IPF5018   | UNCLASSIFIED PROTEINS                                                                       |                                    |
| CA4084 | 1.1 | 1.0 | 1.0 | 1.0 | 1.0 | 1.1 | TPS1      | complemer TREHALOSE-6-PHOS trehalose-6 orf19.6640                | 5016  | CaTPS1    | C-compound and carbohydrate metabolism ENERGY ""CELL RESCUE [transferase activity           |                                    |
| CA4085 | 0.9 | 0.9 | 1.0 | 1.1 | 1.0 | 1.0 | IPF5015   | 13095177..unknown function orf19.6641                            | 5015  | IPF5015   | No significant S.c. match                                                                   |                                    |
| CA4086 | 1.0 | 1.0 | 1.0 | 1.0 | 0.9 | 1.0 | IPF5014   | 13096360..unknown function orf19.6642                            | 5014  | IPF5014   | CELLULAR TRANSPORT AND TRANSPORT MECHANISMS                                                 | molecular_function unknown         |
| CA4087 | 0.9 | 1.1 | 1.0 | 1.0 | 1.1 | 1.1 | IPF5013   | complemer similar to Saccharomyces cerevisi orf19.6643           | 5013  | IPF5013   | Lipid fatty-acid and isoprenoid metabolism ""ENERGY                                         | transferase activity               |
| CA4088 | 1.0 | 0.9 | 0.8 | 0.9 | 0.9 | 1.2 | HMO1      | 13099520..High-mobility protein 1 by homolog orf19.6645          | 5011  | CaHMO1    | SUBCELLULAR LOCALISATION                                                                    | DNA binding,transcription regulato |
| CA4089 | 1.0 | 0.9 | 1.1 | 1.0 | 1.0 | 1.0 | IPF5009   | complemer unknown function orf19.6648                            | 5009  | IPF5009   | CELL CYCLE AND DNA PROCESSING SUBCELLULAR LOCALISATIO                                       | molecular_function unknown         |
| CA4090 | 1.0 | 1.0 | 1.0 | 1.0 | 1.0 | 1.0 | BRF1      | complemer TFIIB subunit TFIIB relat orf19.6649                   | 5007  | CaBRF1    | TRANSCRIPTION SUBCELLULAR LOCALISATION                                                      | transcription regulator activity   |
| CA4091 | 1.1 | 1.1 | 1.0 | 1.1 | 1.0 | 0.9 | IPF5005   | 13104923..unknown function orf19.6650                            | 5005  | IPF5005   | No significant S.c. match                                                                   |                                    |
| CA4092 | 0.9 | 0.9 | 1.0 | 1.0 | 0.9 | 1.0 | DBP8      | complemer DEAD box protein ATP-dependent orf19.6652              | 5004  | CaDBP8    | TRANSCRIPTION                                                                               | RNA binding,helicase activity      |
| CA4093 | 1.1 | 1.0 | 1.0 | 1.1 | 1.0 | 1.0 | IPF5002   | 13107433..GTP binding protein (by homolog orf19.6653             | 5002  | IPF5002   | CLASSIFICATION NOT YET CLEAR-CUT                                                            | molecular_function unknown         |
| CA4094 | 1.0 | 1.0 | 1.0 | 1.0 | 1.0 | 0.9 | IPF4004   | 13114300..unknown function orf19.6658                            | 4004  | IPF4004   | UNCLASSIFIED PROTEINS                                                                       | molecular_function unknown         |
| CA4095 | 1.0 | 1.0 | 1.0 | 1.1 | 1.0 | 1.0 | IPF4002   | complemer unknown function orf19.6660                            | 4002  | IPF4002   | No significant S.c. match                                                                   |                                    |
| CA4096 | 1.0 | 1.0 | 1.0 | 0.9 | 1.0 | 0.9 | KRR1      | complemer involved in cell division and spore orf19.6661         | 4000  | CaKRR1    | SUBCELLULAR LOCALISATION                                                                    | molecular_function unknown         |
| CA4097 | 1.0 | 1.0 | 1.0 | 1.0 | 1.0 | 1.1 | GIN4      | 13124277..ser/thr protein kinase (by homolog orf19.6663          | 3994  | CaGIN4    | CELL CYCLE AND DNA PROCESSING CELL FATE                                                     | protein kinase activity            |
| CA4098 | 0.9 | 1.0 | 0.9 | 0.9 | 1.0 | 0.9 | IPF3988   | complemer unknown function orf19.6664                            | 3988  | IPF3988   | CELLULAR TRANSPORT AND TRANSPORT MECHANISMS CELL FATE CONTROL OF CELLULAR ORC               |                                    |
| CA4099 | 1.1 | 1.1 | 1.0 | 1.0 | 1.0 | 1.0 | IPF3986   | complemer unknown function Ylr186 [Ca orf19.6665                 | 3986  | IPF3986   | UNCLASSIFIED PROTEINS                                                                       | molecular_function unknown         |
| CA4100 | 1.0 | 1.0 | 0.9 | 1.0 | 1.0 | 0.9 | IPF3985   | 13131074..unknown function orf19.6666                            | 3985  | IPF3985   | CELL CYCLE AND DNA PROCESSING ""PROTEIN FATE [folding modif                                 | protein binding                    |
| CA4101 | 1.1 | 1.1 | 1.1 | 1.0 | 1.0 | 0.9 | IPF3984   | 13132115..unknown function orf19.6667                            | 3984  | IPF3984   | No significant S.c. match                                                                   |                                    |
| CA4102 | 1.0 | 1.0 | 0.8 | 0.8 | 1.1 | 1.0 | RPL37B    | complemer Ribosomal protein orf19.6668                           | 20156 | CaRPL37B  | PROTEIN SYNTHESIS SUBCELLULAR LOCALISATION                                                  | structural molecule activity       |
| CA4103 | 1.0 | 1.0 | 1.0 | 1.0 | 1.0 | 1.0 | IPF3980   | 13134897..unknown function orf19.6668                            | 3980  | IPF3980   | UNCLASSIFIED PROTEINS                                                                       | DNA binding,transcription regulato |
| CA4104 | 1.0 | 1.0 | 1.0 | 1.0 | 1.0 | 1.0 | IPF20157  | complemer unknown function orf19.6669                            | 20157 | IPF20157  | UNCLASSIFIED PROTEINS                                                                       | molecular_function unknown         |
| CA4105 | 1.0 | 1.0 | 0.9 | 0.9 | 1.1 | 1.1 | SMT3      | 13138818..Ubiquitin-like protein (by homolog orf19.670           | 20158 | CaSMT3    | PROTEIN FATE [folding modification destination]                                             |                                    |
| CA4107 | 1.0 | 1.0 | 1.0 | 1.0 | 1.0 | 1.0 | IPF3970   | 13140769..unknown function orf19.671                             | 3970  | IPF3970   | UNCLASSIFIED PROTEINS                                                                       | molecular_function unknown         |
| CA4108 | 1.0 | 1.0 | 1.1 | 1.0 | 1.0 | 1.0 | IPF3968   | 13145290..similar to Saccharomyces cerevisi orf19.672            | 3968  | IPF3968   | TRANSCRIPTION SUBCELLULAR LOCALISATION                                                      | RNA binding,helicase activity      |
| CA4109 | 1.0 | 1.1 | 1.0 | 1.0 | 1.0 | 1.0 | IPF3967   | complemer unknown function orf19.673                             | 3967  | IPF3967   | ENERGY                                                                                      |                                    |
| CA4110 | 1.0 | 1.1 | 1.1 | 1.0 | 1.0 | 1.0 | IPF3965   | complemer unknown function orf19.674                             | 3965  | IPF3965   | UNCLASSIFIED PROTEINS                                                                       | molecular_function unknown         |
| CA4111 | 0.9 | 0.9 | 0.8 | 0.7 | 0.9 | 0.9 | IPF3964   | complemer unknown function orf19.675                             | 3964  | IPF3964   | No significant S.c. match                                                                   |                                    |
| CA4112 | 0.9 | 0.9 | 1.0 | 1.0 | 0.9 | 1.1 | BIM1      | complemer microtubule-binding protein (by ho orf19.676           | 7699  | CaBIM1    | CELL CYCLE AND DNA PROCESSING CONTROL OF CELLULAR ORC[structural molecule activity          |                                    |
| CA4113 | 1.1 | 1.0 | 1.0 | 1.0 | 1.0 | 1.0 | CHO1      | 13154895..Phosphatidylserine synthase orf19.677                  | 7703  | CaCHO1    | Lipid fatty-acid and isoprenoid metabolism ""SUBCELLULAR LOCALISA' transferase activity     |                                    |
| CA4114 | 1.0 | 1.0 | 1.0 | 1.0 | 1.0 | 1.1 | IPF7704   | complemer unknown function orf19.679                             | 7704  | IPF7704   | No significant S.c. match                                                                   |                                    |
| CA4115 | 1.0 | 1.1 | 1.0 | 1.0 | 0.9 | 1.1 | IPF7706   | 13156638..putative plasma membrane phosph orf19.680              | 7706  | IPF7706   | UNCLASSIFIED PROTEINS                                                                       | molecular_function unknown         |
| CA4116 | 1.1 | 1.0 | 1.0 | 0.9 | 1.0 | 1.0 | ID1I      | 13165199..isopentenyl-diphosphate delta-isor orf19.2775          | 11947 | CaID1I    | Lipid fatty-acid and isoprenoid metabolism ""SUBCELLULAR LOCALISA' isomerase activity       |                                    |
| CA4117 | 1.2 | 1.2 | 1.0 | 1.1 | 1.0 | 1.1 | LAB5      | 13166539..lipoic acid synthase (by homolog) orf19.2774           | 11949 | CaLAB5    | Metabolism of vitamins cofactors and prosthetic groups ""SUBCELLULAR LOCALISATION           |                                    |
| CA4118 | 0.9 | 1.0 | 0.9 | 1.0 | 0.8 | 0.8 | IPF11952  | 13168575..similar to Saccharomyces cerevisi orf19.2772           | 11952 | IPF11952  | CLASSIFICATION NOT YET CLEAR-CUT                                                            | hydrolase activity                 |
| CA4119 | 0.9 | 0.9 | 0.9 | 0.9 | 1.0 | 1.0 | BEM3      | 13172328..GTPase-activating protein for Cdc orf19.2771           | 7085  | CaBEM3    | CELL FATE CONTROL OF CELLULAR ORGANIZATION PROTEIN AC signal transducer activity            |                                    |
| CA4120 | 1.0 | 1.0 | 1.1 | 1.0 | 0.9 | 1.0 | SOD1.3    | complemer Cu,Zn-superoxide disr Cu,Zn-superoxide disr orf19.2770 | 7082  | CaSOD1.3  | CELL RESCUE DEFENSE AND VIRULENCE ""SUBCELLULAR LOCAL oxidoreductase activity               |                                    |
| CA4121 | 1.0 | 1.0 | 1.0 | 0.9 | 1.0 | 1.0 | IPF7081   | complemer unknown function orf19.2770                            | 7081  | IPF7081   | No significant S.c. match                                                                   |                                    |
| CA4122 | 0.9 | 1.0 | 1.0 | 1.0 | 1.1 | 1.0 | PBI2      | 13178853..proteinase B inhibitor 2 (by homok orf19.2769          | 7079  | CaPBI2    | PROTEIN FATE [folding modification destination] ""SUBCELLULAR LOC enzyme regulator activity |                                    |
| CA4123 | 1.2 | 0.6 | 1.5 | 2.4 | 1.3 | 1.5 | AMS1      | 13179983..alpha-mannosidase (by homolog) orf19.2768              | 7076  | CaAMS1    | C-compound and carbohydrate metabolism SUBCELLULAR LOCALISA'hydrolase activity              |                                    |
| CA4124 | 0.3 | 0.3 | 2.0 | 0.9 | 0.8 | 1.0 | IPF20008  | complemer unknown function orf19.2767                            | 20008 | IPF20008  | No significant S.c. match                                                                   |                                    |
| CA4125 | 0.9 | 0.4 | 1.2 | 1.4 | 0.7 | 1.4 | IPF20161  | 13195669..unknown function orf19.1028                            | 20161 | IPF20161  | No significant S.c. match                                                                   |                                    |
| CA4126 | 1.1 | 1.0 | 0.9 | 1.0 | 1.0 | 0.9 | IPF6631   | complemer unknown function orf19.2763                            | 6631  | IPF6631   | UNCLASSIFIED PROTEINS                                                                       |                                    |
| CA4127 | 0.9 | 0.9 | 3.0 | 3.5 | 1.5 | 1.4 | IPF6629   | complemer unknown function orf19.2762                            | 6629  | IPF6629   | CELL RESCUE DEFENSE AND VIRULENCE ""REGULATION OF/INTEI oxidoreductase activity             |                                    |
| CA4128 | 1.0 | 0.9 | 1.0 | 1.0 | 1.0 | 1.0 | IPF6876   | 13208708..unknown function orf19.1172                            | 6876  | IPF6876   | No significant S.c. match                                                                   |                                    |
| CA4129 | 0.9 | 1.0 | 1.0 | 1.0 | 1.1 | 1.0 | IPF6878   | complemer unknown function orf19.1172                            | 6878  | IPF6878   | CLASSIFICATION NOT YET CLEAR-CUT                                                            | hydrolase activity                 |
| CA4130 | 1.0 | 1.0 | 1.0 | 1.0 | 0.9 | 1.0 | IPF20009  | 13216409..Unknown function orf19.1172                            | 20009 | IPF20009  | REGULATION OF/INTERACTION WITH CELLULAR ENVIRONMENT                                         | molecular_function unknown         |
| CA4131 | 1.0 | 1.0 | 0.9 | 1.0 | 1.0 | 1.0 | IPF6886   | 13218620..unknown function orf19.1171                            | 6886  | IPF6886   | UNCLASSIFIED PROTEINS                                                                       | protein binding                    |
| CA4132 | 1.0 | 0.9 | 1.0 | 1.0 | 1.1 | 1.0 | STE20     | 13221889..serine/threonine-specif serine/thre orf19.4242         | 7017  | CaSTE20   | REGULATION OF/INTERACTION WITH CELLULAR ENVIRONMENT C                                       | protein kinase activity            |
| CA4133 | 1.0 | 1.1 | 1.0 | 1.0 | 1.1 | 1.1 | IPF7010.3 | complemer unknown function, 3-prime end orf19.4241               | 7011  | IPF7010.3 | No significant S.c. match                                                                   |                                    |
| CA4134 | 1.0 | 1.0 | 1.0 | 1.0 | 0.9 | 1.0 | COS162    | 13228250..involved in manganese homeostas orf19.4240             | 7009  | CaCOS162  | REGULATION OF/INTERACTION WITH CELLULAR ENVIRONMENT S                                       | molecular_function unknown         |
| CA4135 | 1.0 | 1.0 | 1.0 | 1.0 | 1.0 | 0.9 | IPF20163  | 13229832..unknown function orf19.4239                            | 20163 | IPF20163  | No significant S.c. match                                                                   |                                    |
| CA4136 | 1.0 | 1.0 | 1.1 | 0.9 | 1.0 | 1.0 | RET2      | 13232107..Coatomer complex delta chain (by orf19.4236            | 7005  | CaRET2    | CELLULAR TRANSPORT AND TRANSPORT MECHANISMS SUBCELL                                         | protein binding                    |
| CA4137 | 1.0 | 1.0 | 0.9 | 1.0 | 1.1 | 1.1 | CNA1      | complemer cyclic nucleotide phosph cyclic nucle orf19.4235       | 7003  | CaCNA1    | Nucleotide metabolism SUBCELLULAR LOCALISATION                                              | hydrolase activity                 |
| CA4138 | 1.1 | 1.2 | 1.1 | 1.1 | 1.1 | 1.1 | IPF11954  | 13237155..unknown function orf19.4234                            | 11954 | IPF11954  | UNCLASSIFIED PROTEINS                                                                       | molecular_function unknown         |
| CA4139 | 1.1 | 1.1 | 1.0 | 1.1 | 1.0 | 1.0 | THR4      | complemer threonine synthase (by homolog) orf19.4233             | 11957 | CaTHR4    | Amino acid metabolism SUBCELLULAR LOCALISATION                                              | lyase activity                     |
| CA4140 | 1.0 | 1.2 | 1.0 | 1.1 | 1.1 | 1.0 | IPF11959  | 13240577..unknown function orf19.4232                            | 11959 | IPF11959  | UNCLASSIFIED PROTEINS                                                                       | molecular_function unknown         |
| CA4141 | 1.0 | 1.0 | 0.9 | 1.0 | 0.9 | 1.0 | PTH2      | complemer proline transport helper orf19.1170                    | 16485 | CaPTH2    | CLASSIFICATION NOT YET CLEAR-CUT                                                            |                                    |
| CA4142 | 1.0 | 1.1 | 0.9 | 0.9 | 0.9 | 1.0 | PRE4      | complemer 20S proteasome subunit(beta7) (b orf19.1170            | 13337 | CaPRE4    | PROTEIN FATE [folding modification destination] ""SUBCELLULAR LOC                           | peptidase activity                 |
| CA4143 | 0.9 | 1.0 | 1.0 | 1.1 | 1.0 | 1.1 | DDP1      | 13251761..diadenosine and diphosphoinosito orf19.4229            | 13339 | CaDDP1    | CELL RESCUE DEFENSE AND VIRULENCE                                                           | hydrolase activity                 |
| CA4144 | 1.0 | 0.9 | 1.0 | 1.0 | 1.0 | 1.1 | IPF13340  | complemer unknown function orf19.4228                            | 13340 | IPF13340  | UNCLASSIFIED PROTEINS                                                                       | molecular_function unknown         |
| CA4145 | 1.0 | 1.1 | 1.1 | 1.1 | 1.0 | 0.9 | IPF3130   | complemer unknown function orf19.4227                            | 3130  | IPF3130   | No significant S.c. match                                                                   |                                    |
| CA4146 | 1.0 | 1.1 | 1.0 | 1.0 | 1.0 | 0.9 | LEU3      | 13256314..Binds to UASs in promoters of LEL orf19.1170           | 3138  | CaLEU3    | Amino acid metabolism TRANSCRIPTION SUBCELLULAR LOCALISAT                                   | transcription regulator activity   |
| CA4147 | 1.0 | 1.1 | 1.0 | 1.2 | 1.0 | 1.0 | ADE8      | 13263190..Phosphoribosylglycinamide formyl orf19.1321            | 17327 | CaADE8    | Nucleotide metabolism Purine ribonucleotide metabolism SUBCELLULA                           | transferase activity               |
| CA4148 | 1.0 | 1.1 | 1.0 | 0.9 | 1.1 | 1.1 | IDH2      | complemer Isocitrate dehydrogenase (NAD+) orf19.1321             | 6833  | CaIDH2    | C-compound and carbohydrate metabolism ENERGY TRANSCRIPTION oxidoreductase activity         |                                    |
| CA4149 | 0.9 | 1.1 | 0.9 | 1.0 | 1.0 | 1.0 | SMP3      | 13266283..Protein kinase C pathway protein orf19.5792            | 6831  | CaSMP3    | CELL CYCLE AND DNA PROCESSING CELL FATE                                                     | molecular_function unknown         |
| CA4150 | 1.0 | 1.0 | 1.0 | 1.1 | 1.1 | 1.2 | RPT3      | complemer 26S proteasome regulatory subun orf19.5793             | 6830  | CaRPT3    | PROTEIN FATE [folding modification destination] ""SUBCELLULAR LOC                           | peptidase activity                 |
| CA4151 | 1.0 | 1.0 | 1.1 | 1.0 | 1.0 | 1.0 | SHE9      | complemer causes lethality when cShe9 prote orf19.5796           | 6829  | CaSHE9    | UNCLASSIFIED PROTEINS                                                                       | molecular_function unknown         |
| CA4153 | 1.0 | 1.0 | 1.0 | 1.1 | 1.0 | 0.9 | DNL1      | complemer CANAL DNA LIGASE i ATP-depen orf19.5798                | 6823  | CaDNL1    | CELL CYCLE AND DNA PROCESSING CELL FATE SUBCELLULAR LC                                      | ligase activity                    |
| CA4154 | 1.0 | 1.0 | 1.0 | 1.0 | 1.1 | 1.0 | IPF20010  | 13277763..unknown function orf19.5799                            | 20010 | IPF20010  | UNCLASSIFIED PROTEINS                                                                       |                                    |
| CA4155 | 1.0 | 0.9 | 1.1 | 0.8 | 1.0 | 1.0 | RNR21     | 13281287..ribonucleoside-diphosphate reduct orf19.5801           | 10991 | CaRNR21   | Nucleotide metabolism CELL CYCLE AND DNA PROCESSING SUBCE                                   | oxidoreductase activity            |

|        |     |     |     |     |     |     |              |                                                        |             |       |            |                                                                                              |                                                               |
|--------|-----|-----|-----|-----|-----|-----|--------------|--------------------------------------------------------|-------------|-------|------------|----------------------------------------------------------------------------------------------|---------------------------------------------------------------|
| CA4156 | 1.0 | 1.0 | 1.1 | 0.9 | 0.9 | 1.0 | IPF10990     | 13282933..unknown function                             | orf19.5802  | 10990 | IPF10990   | UNCLASSIFIED PROTEINS                                                                        | molecular_function unknown                                    |
| CA4157 | 1.0 | 1.0 | 1.0 | 1.0 | 1.1 | 1.1 | HYU1         | 13284597..hydantoin utilization protein A (hyu         | orf19.5804  | 10288 | CaHYU1     | Amino acid metabolism                                                                        | molecular_function unknown                                    |
| CA4158 | 1.0 | 1.1 | 1.1 | 1.0 | 0.8 | 1.0 | DLD3         | 13288923..D-lactate ferricytochrome C oxid             | orf19.5805  | 10287 | CaDLD3     | C-compound and carbohydrate metabolism                                                       | ENERGY SUBCELLULAR LOCALISATION                               |
| CA4159 | 1.3 | 2.0 | 1.0 | 0.9 | 1.0 | 0.9 | ALD5         | 13293088..aldehyde dehydrogenase (NAD+)                | orf19.13221 | 17030 | CaALD5     | ENERGY SUBCELLULAR LOCALISATION                                                              | oxidoreductase activity                                       |
| CA4160 | 1.0 | 1.0 | 1.0 | 1.0 | 1.0 | 0.9 | IPF9294      | 13294957..unknown function                             | orf19.5808  | 9294  | IPF9294    | UNCLASSIFIED PROTEINS                                                                        | transferase activity                                          |
| CA4161 | 0.9 | 1.0 | 1.0 | 1.0 | 1.1 | 1.0 | IPF20164     | complemer putative kynurenine aminotransfer            | orf19.5809  | 20164 | IPF20164   | Nitrogen and sulphur metabolism                                                              | hydrolase activity                                            |
| CA4162 | 1.0 | 0.9 | 1.0 | 1.1 | 1.0 | 1.0 | MET1         | complemer siroheme synthase (by homology)              | orf19.5811  | 9300  | CaMET1     | Metabolism of vitamins cofactors and prosthetic groups                                       | transferase activity                                          |
| CA4163 | 1.2 | 0.9 | 1.0 | 1.0 | 1.1 | 1.1 | IPF9301      | 13300548..unknown function                             | orf19.5812  | 9301  | IPF9301    | UNCLASSIFIED PROTEINS                                                                        | molecular_function unknown                                    |
| CA4164 | 1.1 | 1.0 | 0.9 | 1.1 | 1.0 | 1.0 | IPF9302      | complemer unknown function                             | orf19.13231 | 9302  | IPF9302    | UNCLASSIFIED PROTEINS                                                                        | molecular_function unknown                                    |
| CA4165 | 1.0 | 1.0 | 1.0 | 1.1 | 1.0 | 1.0 | IPF7774      | complemer unknown function                             | orf19.10481 | 7774  | IPF7774    | No significant S.c. match                                                                    |                                                               |
| CA4166 | 1.0 | 1.0 | 1.0 | 0.9 | 1.0 | 1.0 | TIF34        | complemer Translation initiation factor eIF3, p        | orf19.2967  | 7775  | CaTIF34    | PROTEIN SYNTHESIS SUBCELLULAR LOCALISATION                                                   | translation regulator activity                                |
| CA4167 | 0.9 | 1.0 | 1.0 | 1.1 | 1.1 | 1.2 | IPF7778      | complemer putative carboxymethylenebutenol             | orf19.2966  | 7778  | IPF7778    | UNCLASSIFIED PROTEINS                                                                        | hydrolase activity                                            |
| CA4168 | 0.9 | 0.9 | 1.0 | 1.0 | 1.0 | 1.1 | IPF7781      | complemer putative pump-driving ATPase                 | orf19.2965  | 7781  | IPF7781    | CELL RESCUE DEFENSE AND VIRULENCE                                                            | molecular_function unknown                                    |
| CA4169 | 1.2 | 1.0 | 1.0 | 1.1 | 1.0 | 1.0 | RSC2         | 13309517..Member of RSC complex, which re              | orf19.2964  | 7783  | CaRSC2     | CELL CYCLE AND DNA PROCESSING SUBCELLULAR LOCALISATIO                                        | molecular_function unknown                                    |
| CA4170 | 0.9 | 0.9 | 1.0 | 1.0 | 1.1 | 1.0 | IPF7784      | 13312164..unknown function                             | orf19.2963  | 7784  | IPF7784    | CELL CYCLE AND DNA PROCESSING TRANSCRIPTION ""PROTEIN FATE [folding modification destinati   |                                                               |
| CA4171 | 1.0 | 1.0 | 1.1 | 1.0 | 1.1 | 1.0 | IPF7785      | complemer unknown function                             | orf19.2962  | 7785  | IPF7785    | No significant S.c. match                                                                    |                                                               |
| CA4172 | 1.1 | 1.0 | 1.1 | 1.1 | 1.0 | 1.0 | IPF4432      | complemer unknown function                             | orf19.2961  | 4432  | IPF4432    | CELL CYCLE AND DNA PROCESSING TRANSCRIPTION SUBCELLULAR LOCALISATION                         |                                                               |
| CA4173 | 1.0 | 1.1 | 0.9 | 1.0 | 1.1 | 1.0 | FRS2         | complemer phenylalanine--tRNA ligase beta c            | orf19.2960  | 4431  | CaFRS2     | PROTEIN SYNTHESIS SUBCELLULAR LOCALISATION                                                   | ligase activity                                               |
| CA4174 | 1.0 | 1.0 | 0.9 | 0.9 | 1.0 | 1.0 | IPF4119.5    | 13324134..unknown function, 5-prime end                |             | 4430  | IPF4119.5  | CLASSIFICATION NOT YET CLEAR-CUT                                                             |                                                               |
| CA4175 | 1.1 | 1.1 | 1.0 | 1.1 | 1.0 | 0.9 | IPF4425.REPE | 13327113..unknown function                             | orf19.2958  | 4427  | IPF4425.re | UNCLASSIFIED PROTEINS                                                                        |                                                               |
| CA4176 | 1.1 | 1.1 | 1.0 | 1.1 | 1.1 | 1.0 | IPF4425.REPE | 13330464..unknown function                             | orf19.2957  | 4425  | IPF4425.re | UNCLASSIFIED PROTEINS                                                                        |                                                               |
| CA4177 | 1.0 | 1.0 | 1.0 | 0.9 | 1.0 | 0.9 | MGM101       | 13333161..mitochondrial genome maintenanc              | orf19.2956  | 4423  | CaMGM10    | CELL CYCLE AND DNA PROCESSING SUBCELLULAR LOCALISATIO                                        | DNA binding                                                   |
| CA4178 | 0.9 | 1.0 | 1.0 | 0.9 | 1.0 | 1.0 | IPF4421      | complemer unknown function                             | orf19.2954  | 4421  | IPF4421    | No significant S.c. match                                                                    |                                                               |
| CA4179 | 1.1 | 1.1 | 1.0 | 0.9 | 1.0 | 1.0 | TOM20        | 13335192..mitochondrial outer membrane im              | orf19.2953  | 4420  | CaTOM20    | PROTEIN FATE [folding modification destination] ""CELLULAR TRANSP                            | transporter activity                                          |
| CA4180 | 1.0 | 1.1 | 1.0 | 1.0 | 1.0 | 1.0 | EXG2         | 13336189..glucan 1,3-beta-glucosidase-like b           | orf19.2952  | 4419  | CaEXG2     | C-compound and carbohydrate metabolism                                                       | CELL FATE SUBCELLULAR LOCALISATION                            |
| CA4181 | 1.1 | 1.1 | 1.1 | 1.0 | 1.2 | 1.1 | HOM6         | 13337992..homoserine dehydrogenase (by h               | orf19.2951  | 4417  | CaHOM6     | Amino acid metabolism                                                                        | oxidoreductase activity                                       |
| CA4182 | 1.0 | 0.9 | 1.0 | 1.0 | 1.0 | 1.0 | IPF19797     | complemer similar to Saccharomyces cerevisi            | orf19.10461 | 19797 | IPF19797   | CELL CYCLE AND DNA PROCESSING CONTROL OF CELLULAR ORC                                        | molecular_function unknown                                    |
| CA4183 | 1.0 | 1.0 | 1.0 | 1.0 | 1.1 | 1.0 | SNO1         | complemer hisH-like protein (by homology)              | orf19.10461 | 4408  | CaSNO1     | CELL RESCUE DEFENSE AND VIRULENCE                                                            | protein binding                                               |
| CA4184 | 1.0 | 1.0 | 1.0 | 0.9 | 0.9 | 1.0 | SNZ1         | 13345964..stationary phase protein by homol            | orf19.2947  | 10248 | CaSNZ1     | CELL CYCLE AND DNA PROCESSING ""CELL RESCUE DEFENSE A                                        | protein binding                                               |
| CA4185 | 1.0 | 1.0 | 1.1 | 1.1 | 1.0 | 1.0 | HNM4         | complemer Choline permease-like (by homol              | orf19.2946  | 10246 | CaHNM4     | CELLULAR TRANSPORT AND TRANSPORT MECHANISMS SUBCELLULAR LOCALISATION TRANSP                  | TRANSPORT FACILITATION                                        |
| CA4186 | 0.9 | 1.0 | 1.0 | 1.0 | 0.9 | 1.0 | PUT4         | 13349485..proline permease                             | orf19.2945  | 10243 | CaPUT4     | Amino acid metabolism                                                                        | TRANSPORT FACILITATION                                        |
| CA4187 | 1.0 | 1.0 | 1.0 | 0.9 | 1.0 | 1.0 | IPF7524      | 13356397..unknown function                             | orf19.12001 | 7524  | IPF7524    | UNCLASSIFIED PROTEINS                                                                        | molecular_function unknown                                    |
| CA4188 | 1.0 | 1.0 | 1.0 | 1.1 | 1.0 | 1.0 | IPF7525      | 13357317..unknown function                             | orf19.4529  | 7525  | IPF7525    | No significant S.c. match                                                                    |                                                               |
| CA4189 | 1.0 | 0.9 | 1.1 | 1.3 | 1.2 | 1.3 | IPF7527      | complemer unknown function                             |             | 7527  | IPF7527    | CELLULAR COMMUNICATION/SIGNAL TRANSDUCTION MECHANISM REGULATION OF/INTERACTIO                |                                                               |
| CA4190 | 1.0 | 0.9 | 1.0 | 0.9 | 0.9 | 1.0 | IPF7530      | complemer ATP-binding-cassette protein (by             | orf19.12001 | 7530  | IPF7530    | TRANSPORT FACILITATION                                                                       | transporter activity                                          |
| CA4191 | 1.0 | 0.9 | 1.0 | 1.1 | 1.0 | 1.0 | IPF7531      | complemer unknown function                             | orf19.12001 | 7531  | IPF7531    | UNCLASSIFIED PROTEINS                                                                        | molecular_function unknown                                    |
| CA4192 | 1.0 | 1.1 | 1.0 | 1.0 | 0.9 | 1.0 | IPF7533      | 13367323..unknown function                             | orf19.4533  | 7533  | IPF7533    | PROTEIN FATE [folding modification destination] ""CELLULAR TRANSP                            | RNA binding                                                   |
| CA4193 | 0.9 | 0.9 | 1.0 | 1.0 | 1.0 | 1.0 | IPF7535      | 13369287..unknown function                             | orf19.4534  | 7535  | IPF7535    | UNCLASSIFIED PROTEINS                                                                        | molecular_function unknown                                    |
| CA4194 | 1.1 | 1.0 | 0.9 | 1.0 | 1.0 | 1.0 | PTR3         | 13371163..transcriptional regulator (by homol          | orf19.4535  | 19799 | CaPTR3     | TRANSCRIPTION                                                                                |                                                               |
| CA4195 | 1.0 | 1.0 | 1.1 | 1.0 | 1.0 | 1.0 | CYS4         | 13373807..cystathionine beta-synthase (by h            | orf19.4536  | 8061  | CaCYS4     | Amino acid metabolism                                                                        | lyase activity                                                |
| CA4196 | 1.0 | 1.0 | 1.0 | 1.0 | 0.9 | 1.1 | DST1         | complemer RNA polymerase II elongation fact            | orf19.4537  | 8059  | CaDST1     | CELL CYCLE AND DNA PROCESSING TRANSCRIPTION SUBCELLUL                                        | transcription regulator activity                              |
| CA4197 | 1.0 | 1.0 | 1.0 | 1.0 | 1.0 | 1.0 | IPF8057      | 13376497..similar to Saccharomyces cerevisi            | orf19.4538  | 8057  | IPF8057    | TRANSCRIPTION SUBCELLULAR LOCALISATION                                                       | RNA binding                                                   |
| CA4198 | 1.0 | 1.0 | 1.0 | 1.0 | 1.0 | 0.9 | IPF8055      | 13377995..unknown function                             | orf19.4539  | 8055  | IPF8055    | CELL FATE SUBCELLULAR LOCALISATION PROTEIN ACTIVITY REGULATION                               |                                                               |
| CA4199 | 1.1 | 1.1 | 1.0 | 1.0 | 1.1 | 1.0 | UBC8         | 13379302..ubiquitin-conjugating enzyme (by             | orf19.4540  | 8054  | CaUBC8     | PROTEIN FATE [folding modification destination]                                              |                                                               |
| CA4200 | 1.0 | 1.0 | 1.0 | 1.1 | 1.1 | 1.0 | CCL1         | 13380436..cyclin (by homology)                         | orf19.4542  | 8051  | CaCCL1     | CELL CYCLE AND DNA PROCESSING TRANSCRIPTION SUBCELLUL                                        | transcription regulator activity                              |
| CA4201 | 0.9 | 1.0 | 1.0 | 1.0 | 1.1 | 1.0 | IPF8048      | 13381912..probable succinate-semialdehyde              | orf19.4543  | 8048  | IPF8048    | Amino acid metabolism                                                                        |                                                               |
| CA4202 | 1.0 | 1.0 | 1.0 | 1.0 | 1.0 | 1.0 | IPF8047      | complemer unknown function                             | orf19.4544  | 8047  | IPF8047    | No significant S.c. match                                                                    |                                                               |
| CA4203 | 1.1 | 1.0 | 1.1 | 1.0 | 1.0 | 1.0 | SWI4         | complemer transcription factor (by homology)           | orf19.12021 | 17386 | CaSWI4     | CELL CYCLE AND DNA PROCESSING TRANSCRIPTION SUBCELLULAR LOCALISATION                         |                                                               |
| CA4204 | 0.9 | 0.9 | 1.0 | 0.9 | 1.0 | 0.8 | HOL4         | 13390282..member of major facilitator super            | orf19.1202  | 14750 | CaHOL4     | CELL RESCUE DEFENSE AND VIRULENCE ""TRANSPORT FACILITATION                                   |                                                               |
| CA4205 | 1.0 | 1.0 | 0.9 | 1.0 | 1.0 | 0.9 | IFA10        | complemer unknown function                             | orf19.12021 | 9076  | CaIFA10    | Nucleotide metabolism                                                                        | CELL CYCLE AND DNA PROCESSING CELLULAR COMMUNICATION/SIGNAL T |
| CA4206 | 1.0 | 1.0 | 1.0 | 1.0 | 0.9 | 1.0 | IPF9079      | complemer Membrane transporter (by homolo              | orf19.4550  | 9079  | IPF9079    | CELL RESCUE DEFENSE AND VIRULENCE ""TRANSPORT FACILIT                                        | molecular_function unknown                                    |
| CA4207 | 1.1 | 1.0 | 1.0 | 1.0 | 1.0 | 1.0 | YAT1         | complemer carnitine acetyltransferase (by hon          | orf19.4551  | 9082  | CaYAT1     | Lipid fatty-acid and isoprenoid metabolism ""CELLULAR TRANSPORT A                            | transferase activity                                          |
| CA4208 | 1.1 | 1.0 | 1.1 | 1.1 | 0.9 | 1.1 | CHS5.5EOC    | complemer chitin biosynthesis, 5-prime end             |             | 18240 | CaCHS5.5   | C-compound and carbohydrate metabolism                                                       | CELL FATE SUBCELLULAR LOCALISATION                            |
| CA4209 | 1.0 | 1.0 | 1.0 | 1.0 | 1.0 | 1.0 | DEP1.3F      | complemer Regulator of phospholipid metabol            | orf19.8427  | 18239 | CaDEP1.3I  | Lipid fatty-acid and isoprenoid metabolism ""SUBCELLULAR LOCALISA'                           | molecular_function unknown                                    |
| CA4210 | 1.1 | 1.0 | 1.1 | 1.0 | 1.0 | 1.0 | DEP1.5F      | complemer Regulator of phospholipid metabol            | orf19.8428  | 18238 | CaDEP1.5I  | No significant S.c. match                                                                    |                                                               |
| CA4211 | 0.9 | 1.0 | 1.0 | 1.0 | 1.0 | 1.0 | IPF5052      | 13410471..RNA-binding protein (by homology)            | orf19.809   | 5051  | IPF5052    | UNCLASSIFIED PROTEINS                                                                        | RNA binding                                                   |
| CA4212 | 1.0 | 1.0 | 1.0 | 1.0 | 1.0 | 0.9 | HFM1         | complemer DNA/RNA helicase by homology                 | orf19.810   | 5050  | CaHFM1     | TRANSCRIPTION SUBCELLULAR LOCALISATION                                                       | DNA binding, helicase activity                                |
| CA4213 | 0.9 | 0.9 | 1.0 | 1.1 | 1.1 | 0.9 | IPF5795      | complemer unknown function                             | orf19.811   | 5795  | IPF5795    | UNCLASSIFIED PROTEINS                                                                        | molecular_function unknown                                    |
| CA4214 | 1.0 | 1.0 | 1.0 | 1.0 | 1.0 | 1.0 | IPF5796      | complemer unknown function                             | orf19.812   | 5796  | IPF5796    | No significant S.c. match                                                                    |                                                               |
| CA4215 | 1.0 | 1.0 | 1.1 | 1.0 | 1.1 | 1.0 | SSY1         | 13422639..Regulator of transporters (by hom            | orf19.8434  | 5802  | CaSSY1     | Amino acid metabolism                                                                        | TRANSCRIPTION                                                 |
| CA4216 | 1.1 | 1.0 | 1.0 | 1.4 | 1.2 | 1.4 | IPF5806      | 13426650..unknown function                             | orf19.8435  | 5806  | IPF5806    | UNCLASSIFIED PROTEINS                                                                        | molecular_function unknown                                    |
| CA4217 | 1.0 | 1.1 | 0.9 | 1.0 | 1.0 | 1.0 | IPF5809      | 13433312..unknown function                             | orf19.816   | 5809  | IPF5809    | UNCLASSIFIED PROTEINS                                                                        |                                                               |
| CA4218 | 1.0 | 0.9 | 0.9 | 1.0 | 1.0 | 1.0 | ACP1         | 13438905..mitochondrial acyl carrier protein (         | orf19.819   | 8766  | CaACP1     | Lipid fatty-acid and isoprenoid metabolism ""SUBCELLULAR LOCALISATION TRANSPORT FACILITATION |                                                               |
| CA4219 | 1.1 | 1.0 | 1.0 | 1.0 | 1.0 | 0.9 | SDS22        | 13439771..regulatory subunit for the mitotic f         | orf19.820   | 8765  | CaSDS22    | CELL CYCLE AND DNA PROCESSING ""PROTEIN FATE [folding modifi                                 | enzyme regulator activity                                     |
| CA4220 | 1.1 | 0.6 | 0.3 | 0.3 | 0.4 | 0.1 | IPF8762      | 13441293..unknown function                             | orf19.822   | 8762  | IPF8762    | No significant S.c. match                                                                    |                                                               |
| CA4221 | 0.9 | 1.0 | 0.9 | 1.0 | 1.0 | 1.0 | IPF8760      | 13442052..unknown function                             | orf19.823   | 8760  | IPF8760    | No significant S.c. match                                                                    |                                                               |
| CA4222 | 1.0 | 1.0 | 1.0 | 1.0 | 1.0 | 1.1 | GCD7         | complemer translation initiation factor eIF2b          | surf19.825  | 8759  | CaGCD7     | PROTEIN SYNTHESIS SUBCELLULAR LOCALISATION                                                   | translation regulator activity                                |
| CA4223 | 1.0 | 0.9 | 1.1 | 1.1 | 0.9 | 1.0 | IPF8757      | 13444107..unknown function                             | orf19.826   | 8757  | IPF8757    | No significant S.c. match                                                                    |                                                               |
| CA4224 | 1.1 | 1.1 | 1.0 | 0.9 | 1.0 | 1.0 | IPF8755      | complemer unknown function                             | orf19.827   | 8755  | IPF8755    | No significant S.c. match                                                                    |                                                               |
| CA4225 | 1.1 | 1.0 | 0.9 | 1.0 | 1.0 | 1.0 | RPL39.3      | complemer ribosomal protein L39, ribosomal protein L39 | orf19.828   | 8753  | CaRPL39.3  | PROTEIN SYNTHESIS SUBCELLULAR LOCALISATION                                                   | molecular_function unknown                                    |
| CA4226 | 1.0 | 0.9 | 1.0 | 1.0 | 0.9 | 1.1 | IPF8752      | complemer similar to Saccharomyces cerevisi            | orf19.828   | 8752  | IPF8752    | PROTEIN SYNTHESIS SUBCELLULAR LOCALISATION                                                   | structural molecule activity                                  |
| CA4227 | 0.9 | 1.0 | 1.0 | 1.0 | 1.0 | 1.0 | SCH9         | 13452163..strong similarity to S.pombe sck1            | orf19.829   | 13426 | CaSCH9     | CELL CYCLE AND DNA PROCESSING REGULATION OF/INTERACTIO                                       | protein kinase activity                                       |

|        |     |     |     |     |     |     |             |                                                       |             |       |            |                                                                                                |
|--------|-----|-----|-----|-----|-----|-----|-------------|-------------------------------------------------------|-------------|-------|------------|------------------------------------------------------------------------------------------------|
| CA4228 | 1.0 | 1.0 | 0.9 | 0.9 | 1.0 | 1.0 | IPF16057    | 13455459..unknown function                            | orf19.831   | 16057 | IPF16057   | C-compound and carbohydrate metabolism TRANSCRIPTION CELL FA' transcription regulator activity |
| CA4229 | 1.0 | 1.1 | 1.1 | 1.1 | 1.0 | 1.1 | IPF12480.5  | complemer unknown function, 5-prime end               |             | 12480 | IPF12480.5 | CELLULAR COMMUNICATION/SIGNAL TRANSDUCTION MECHANISM                                           |
| CA4230 | 1.0 | 1.0 | 1.0 | 0.9 | 1.0 | 1.0 | IPF12481    | 13459645..unknown function                            | orf19.513   | 12481 | IPF12481   | CELL CYCLE AND DNA PROCESSING                                                                  |
| CA4231 | 1.0 | 1.0 | 1.1 | 1.1 | 1.0 | 1.0 | SNP3        | 13461408..snRNP-related protein (by homolo            | orf19.514   | 12483 | CaSNP3     | TRANSCRIPTION SUBCELLULAR LOCALISATION                                                         |
| CA4232 | 1.0 | 1.0 | 1.1 | 1.1 | 1.0 | 1.0 | IPF12484    | complemer unknown function                            | orf19.515   | 12484 | IPF12484   | UNCLASSIFIED PROTEINS                                                                          |
| CA4233 | 1.0 | 0.9 | 1.0 | 1.0 | 1.0 | 1.0 | RFT1        | complemer nuclear division protein (by homolo         | orf19.516   | 12486 | CaRFT1     | CELL CYCLE AND DNA PROCESSING SUBCELLULAR LOCALISATION                                         |
| CA4234 | 1.0 | 1.0 | 1.1 | 0.9 | 0.9 | 0.9 | HAP3        | 13465254..CCAAT-binding factor subunit (by            | orf19.517   | 12488 | CaHAP3     | TRANSCRIPTION SUBCELLULAR LOCALISATION                                                         |
| CA4235 | 1.0 | 1.1 | 1.0 | 1.0 | 1.0 | 1.0 | NCL1        | 13466093..Probable proliferating-cell nucleole        | orf19.518   | 8167  | CaNCL1     | TRANSCRIPTION SUBCELLULAR LOCALISATION                                                         |
| CA4236 | 1.0 | 1.0 | 0.9 | 1.0 | 1.0 | 1.0 | IPF8166     | complemer unknown function                            | orf19.519   | 8166  | IPF8166    | TRANSCRIPTION SUBCELLULAR LOCALISATION                                                         |
| CA4237 | 1.1 | 1.1 | 1.0 | 1.0 | 1.1 | 1.0 | IPF6375     | 13469527..unknown function                            | orf19.520   | 6375  | IPF6375    | No significant S.c. match                                                                      |
| CA4238 | 0.9 | 1.0 | 1.0 | 0.9 | 0.9 | 1.1 | PIM1        | 13471159..mitochondrial ATP-dependent protor          | orf19.522   | 8173  | CaPIM1     | TRANSCRIPTION ""PROTEIN FATE [folding modification destination] ""                             |
| CA4239 | 1.0 | 0.9 | 1.0 | 1.0 | 1.1 | 0.9 | IPF8174     | complemer unknown function                            | orf19.524   | 8174  | IPF8174    | No significant S.c. match                                                                      |
| CA4240 | 1.0 | 0.9 | 1.0 | 0.9 | 1.0 | 1.0 | NHP2        | complemer nucleolar rRNA processing protein           | orf19.526   | 8176  | CaNHP2     | TRANSCRIPTION SUBCELLULAR LOCALISATION                                                         |
| CA4241 | 1.0 | 1.0 | 1.0 | 1.1 | 1.0 | 0.9 | IPF8177     | 13477042..unknown function                            | orf19.527   | 8177  | IPF8177    | No significant S.c. match                                                                      |
| CA4242 | 0.9 | 1.0 | 1.0 | 1.1 | 1.0 | 1.1 | SEC26       | complemer beta chain of secretory vesicles            | coorf19.528 | 15941 | CaSEC26    | CELLULAR TRANSPORT AND TRANSPORT MECHANISMS SUBCELL                                            |
| CA4243 | 1.0 | 0.9 | 1.0 | 1.0 | 1.0 | 1.0 | IPF16491    | complemer unknown function                            | orf19.529   | 16491 | IPF16491   | C-compound and carbohydrate metabolism SUBCELLULAR LOCALISATION                                |
| CA4244 | 0.9 | 1.0 | 1.0 | 1.0 | 1.0 | 1.0 | IPF4305     | 13485139..unknown function                            | orf19.530   | 4305  | IPF4305    | No significant S.c. match                                                                      |
| CA4245 | 1.1 | 1.0 | 1.0 | 1.0 | 0.9 | 1.0 | IPF4303     | complemer unknown function                            | orf19.532   | 4303  | IPF4303    | No significant S.c. match                                                                      |
| CA4246 | 0.9 | 1.0 | 1.0 | 1.0 | 1.0 | 1.0 | IPF4299     | complemer unknown function                            | orf19.535   | 4299  | IPF4299    | No significant S.c. match                                                                      |
| CA4247 | 1.2 | 1.1 | 0.9 | 1.0 | 1.0 | 1.0 | TAF90       | complemer Probable transcription-associated           | orf19.536   | 4296  | CaTAF90    | TRANSCRIPTION SUBCELLULAR LOCALISATION                                                         |
| CA4248 | 1.0 | 1.0 | 1.0 | 1.0 | 1.0 | 1.0 | IPF4294     | complemer unknown function                            | orf19.537   | 4294  | IPF4294    | UNCLASSIFIED PROTEINS                                                                          |
| CA4249 | 1.0 | 1.0 | 1.0 | 1.1 | 1.0 | 1.0 | IPF4293     | 13495440..similar to Saccharomyces cerevisi           | orf19.538   | 4293  | IPF4293    | Lipid fatty-acid and isoprenoid metabolism ""SUBCELLULAR LOCALISA'                             |
| CA4250 | 1.1 | 1.3 | 1.4 | 1.8 | 1.5 | 1.3 | IPF4292     | complemer bleomycin Hydrolase                         | orf19.539   | 4292  | IPF4292    | PROTEIN FATE [folding modification destination] ""CELL RESCUE DE                               |
| CA4251 | 1.1 | 1.1 | 1.1 | 1.1 | 1.0 | 1.0 | IPF4291     | complemer unknown function                            | orf19.540   | 4291  | IPF4291    | CELL CYCLE AND DNA PROCESSING SUBCELLULAR LOCALISATION                                         |
| CA4252 | 1.0 | 1.0 | 0.9 | 1.0 | 0.9 | 0.9 | IPF4290     | complemer unknown function                            | orf19.541   | 4290  | IPF4290    | No significant S.c. match                                                                      |
| CA4253 | 0.9 | 1.0 | 1.0 | 1.1 | 0.9 | 1.0 | IPF4288     | complemer unknown function                            |             | 4288  | IPF4288    | No significant S.c. match                                                                      |
| CA4254 | 1.0 | 1.0 | 1.0 | 1.1 | 1.0 | 1.0 | IPF18234.3  | 13504904..Unknown Function, 3-prime end               |             | 18234 | IPF18234.3 | UNCLASSIFIED PROTEINS                                                                          |
| CA4255 | 1.0 | 1.0 | 1.0 | 1.1 | 1.2 | 1.1 | FUM11       | 13505439..fumarate hydratase                          | orf19.543   | 4283  | CaFUM11    | ENERGY SUBCELLULAR LOCALISATION                                                                |
| CA4256 | 1.0 | 1.0 | 1.0 | 1.1 | 1.0 | 1.0 | IPF4282     | complemer unknown function                            | orf19.544   | 4282  | IPF4282    | TRANSCRIPTION SUBCELLULAR LOCALISATION                                                         |
| CA4257 | 0.9 | 1.0 | 0.9 | 1.1 | 1.0 | 1.0 | PRE6        | 13507748..20S proteasome subunit                      |             | 4281  | CaPRE6     | PROTEIN FATE [folding modification destination] ""SUBCELLULAR LOC                              |
| CA4258 | 0.9 | 1.0 | 1.0 | 1.1 | 1.0 | 1.1 | IPF4279     | complemer unknown function                            | orf19.547   | 4279  | IPF4279    | CELL CYCLE AND DNA PROCESSING SUBCELLULAR LOCALISATION                                         |
| CA4259 | 1.0 | 1.1 | 1.0 | 1.0 | 1.0 | 1.0 | CDC10       | complemer cell division control produded C            | orf19.548   | 4277  | CaCDC10    | C-compound and carbohydrate metabolism CELL CYCLE AND DNA PR                                   |
| CA4260 | 1.0 | 1.0 | 0.9 | 1.1 | 1.0 | 1.0 | IPF4276     | 13511668..similar to Saccharomyces cerevisi           | orf19.549   | 4276  | IPF4276    | PROTEIN SYNTHESIS SUBCELLULAR LOCALISATION                                                     |
| CA4261 | 1.0 | 0.7 | 1.0 | 1.1 | 1.0 | 0.8 | PDX3        | complemer pyridoxamine-phosphate oxidase              | orf19.550   | 4274  | CaPDX3     | Metabolism of vitamins cofactors and prosthetic groups                                         |
| CA4262 | 0.9 | 1.0 | 1.1 | 1.0 | 1.0 | 1.0 | IPF2275     | complemer unknown function                            | orf19.6654  | 2275  | IPF2275    | UNCLASSIFIED PROTEINS                                                                          |
| CA4263 | 0.9 | 1.0 | 1.0 | 1.1 | 0.9 | 1.1 | IPF2277     | complemer unknown function                            | orf19.6656  | 2277  | IPF2277    | REGULATION OF/INTERACTION WITH CELLULAR ENVIRONMENT SUBCELLULAR LOCALISATION                   |
| CA4264 | 1.0 | 1.0 | 1.0 | 1.0 | 1.0 | 1.1 | IPF2280     | complemer unknown function                            | orf19.6658  | 2280  | IPF2280    | No significant S.c. match                                                                      |
| CA4265 | 1.0 | 0.9 | 0.8 | 0.8 | 0.9 | 1.0 | GAP6        | 13521030..General amino acid permease (by             | orf19.6659  | 2282  | CaGAP6     | Amino acid metabolism CELLULAR TRANSPORT AND TRANSPORT MECHANISMS SUBCELLULAR LO               |
| CA4266 | 1.0 | 0.9 | 1.0 | 1.1 | 1.0 | 1.1 | IPF2283     | complemer unknown function                            | orf19.6660  | 2283  | IPF2283    | UNCLASSIFIED PROTEINS                                                                          |
| CA4267 | 1.0 | 1.0 | 1.0 | 1.0 | 1.0 | 0.9 | IPF2286     | 13526537..unknown function                            | orf19.6661  | 2286  | IPF2286    | No significant S.c. match                                                                      |
| CA4268 | 1.0 | 1.0 | 0.9 | 0.9 | 1.0 | 1.0 | IPF2287     | complemer unknown function                            | orf19.6662  | 2287  | IPF2287    | UNCLASSIFIED PROTEINS                                                                          |
| CA4269 | 1.2 | 1.1 | 0.9 | 1.0 | 1.0 | 1.0 | RPS25B      | complemer Cytosolic ribosomal protein (by ho          | orf19.6663  | 2288  | CaRPS25B   | PROTEIN SYNTHESIS SUBCELLULAR LOCALISATION                                                     |
| CA4270 | 1.0 | 1.0 | 1.0 | 1.1 | 1.0 | 1.1 | NUP2        | 13529973..Nuclear pore protein (by homolog            | orf19.6665  | 2295  | CaNUP2     | CELLULAR TRANSPORT AND TRANSPORT MECHANISMS SUBCELL                                            |
| CA4271 | 0.9 | 1.0 | 1.1 | 0.9 | 1.0 | 1.1 | SAP30       | 13532889..Subunit of the histone deacetylase          | orf19.6667  | 2297  | CaSAP30    | TRANSCRIPTION CELL FATE                                                                        |
| CA4272 | 1.1 | 1.0 | 1.0 | 1.0 | 1.0 | 1.1 | CUE1        | 13533828..Involved in ubiquitination and degr         | orf19.6668  | 2299  | CaCUE1     | PROTEIN FATE [folding modification destination]                                                |
| CA4273 | 1.0 | 1.0 | 1.1 | 1.1 | 1.0 | 0.9 | CAC2        | complemer Chromatin assembly complex, subo            | orf19.6670  | 2301  | CaCAC2     | CELL CYCLE AND DNA PROCESSING ""PROTEIN FATE [folding modifi                                   |
| CA4274 | 0.9 | 1.0 | 1.0 | 1.0 | 1.0 | 0.9 | LAP42       | 13536542..Aminopeptidase yscI precursor, ve           | orf19.6671  | 2303  | CaLAP42    | PROTEIN FATE [folding modification destination] ""SUBCELLULAR LOCALISATION                     |
| CA4275 | 1.0 | 1.0 | 0.9 | 0.8 | 0.8 | 1.0 | MDJ1        | 13538604..Heat shock protein - chaperone (b           | orf19.6672  | 2305  | CaMDJ1     | PROTEIN FATE [folding modification destination] ""CELL RESCUE DE                               |
| CA4276 | 1.1 | 1.1 | 1.0 | 1.0 | 1.1 | 0.9 | HEX1        | 13540810..β-N-acetylglucosaminiihexosamin             | orf19.6673  | 2308  | CaHEX1     | No significant S.c. match                                                                      |
| CA4277 | 1.0 | 1.1 | 1.0 | 0.9 | 1.1 | 1.0 | BTS1        | 13543155..Geranylgeranyl diphosphate synth            | orf19.6674  | 2309  | CaBTS1     | Lipid fatty-acid and isoprenoid metabolism                                                     |
| CA4278 | 1.0 | 1.0 | 1.1 | 1.1 | 1.1 | 1.0 | IPF2310     | complemer unknown function                            | orf19.6675  | 2310  | IPF2310    | No significant S.c. match                                                                      |
| CA4279 | 1.0 | 1.0 | 1.0 | 0.9 | 1.0 | 1.0 | DPH51       | 13544839..Diphthamide methyltransferase (b)           | orf19.6676  | 2311  | CaDPH51    | Amino acid metabolism                                                                          |
| CA4280 | 1.0 | 1.0 | 1.0 | 0.9 | 1.0 | 1.0 | IFJ5        | complemer Unknown function                            | orf19.6678  | 2313  | CaIFJ5     | UNCLASSIFIED PROTEINS                                                                          |
| CA4281 | 1.0 | 1.0 | 1.1 | 1.0 | 1.0 | 1.0 | IPF2314     | complemer unknown function                            | orf19.6679  | 2314  | IPF2314    | No significant S.c. match                                                                      |
| CA4282 | 1.0 | 1.0 | 1.0 | 1.0 | 1.0 | 1.1 | IPF2319     | 13552041..unknown function                            | orf19.6680  | 2319  | IPF2319    | TRANSCRIPTION                                                                                  |
| CA4283 | 1.2 | 1.0 | 1.1 | 1.1 | 1.0 | 1.0 | IFJ4        | 13555358..Unknown function                            | orf19.6681  | 2321  | CaIFJ4     | UNCLASSIFIED PROTEINS                                                                          |
| CA4284 | 1.0 | 1.0 | 1.0 | 1.0 | 1.0 | 1.0 | DPH52.3EOC  | complemer Diphthamide methyltransferase, 3-           | orf19.6682  | 2322  | CaDPH52.3  | Amino acid metabolism                                                                          |
| CA4287 | 0.9 | 1.0 | 1.0 | 0.9 | 1.0 | 1.0 | IPF20011.3F | 13557688..similar to Saccharomyces cerevisiae Pnc1p p | orf19.6685  | 20012 | IPF20011.3 | UNCLASSIFIED PROTEINS                                                                          |
| CA4288 | 1.0 | 0.9 | 1.0 | 1.0 | 1.0 | 1.0 | IPF6662     | complemer similar to Saccharomyces cerevisi           | orf19.6685  | 6662  | IPF6662    | TRANSCRIPTION                                                                                  |
| CA4289 | 1.0 | 1.0 | 1.2 | 1.0 | 1.1 | 1.0 | IPF6665     | complemer unknown function                            | orf19.6686  | 6665  | IPF6665    | UNCLASSIFIED PROTEINS                                                                          |
| CA4290 | 1.0 | 1.0 | 1.0 | 1.1 | 1.0 | 1.0 | IPF2617     | complemer unknown function                            | orf19.6687  | 2617  | IPF2617    | No significant S.c. match                                                                      |
| CA4291 | 1.2 | 1.1 | 1.1 | 1.0 | 1.0 | 0.9 | IPF2615     | 13568848..unknown function                            | orf19.6688  | 2615  | IPF2615    | No significant S.c. match                                                                      |
| CA4293 | 1.0 | 1.0 | 1.0 | 1.0 | 1.0 | 1.0 | IFA8        | 13571419..Unknown function                            | orf19.6690  | 2611  | CaIFA8     | UNCLASSIFIED PROTEINS                                                                          |
| CA4294 | 1.0 | 1.0 | 1.0 | 1.0 | 1.0 | 1.0 | ERC1        | complemer ethionine resistance protein (by ho         | orf19.6691  | 2610  | CaERC1     | CELL RESCUE DEFENSE AND VIRULENCE ""TRANSPORT FACILITA                                         |
| CA4295 | 1.1 | 1.0 | 1.1 | 1.0 | 1.0 | 1.0 | MNN7        | 13579767..putative Golgi alpha-1,2-mannosyl           | orf19.6692  | 2606  | CaMNN7     | CELL FATE                                                                                      |
| CA4296 | 1.0 | 1.0 | 1.0 | 1.0 | 1.0 | 1.0 | IPF2605     | complemer unknown function                            | orf19.6693  | 2605  | IPF2605    | UNCLASSIFIED PROTEINS                                                                          |
| CA4297 | 1.0 | 1.0 | 1.0 | 1.0 | 1.1 | 0.9 | IPF2603     | complemer unknown function                            | orf19.6694  | 2603  | IPF2603    | TRANSCRIPTION CELL FATE SUBCELLULAR LOCALISATION                                               |
| CA4298 | 1.0 | 1.0 | 1.0 | 1.1 | 1.0 | 1.0 | TIM9        | complemer Mitochondrial inner membrane tra            | orf19.6696  | 2599  | CaTIM9     | PROTEIN FATE [folding modification destination] ""CELLULAR TRANSP                              |
| CA4299 | 0.9 | 1.0 | 1.0 | 0.9 | 0.9 | 1.0 | IPF2598     | complemer unknown function                            | orf19.6698  | 2598  | IPF2598    | PROTEIN SYNTHESIS REGULATION OF/INTERACTION WITH CELLU                                         |
| CA4300 | 0.9 | 0.9 | 1.0 | 1.0 | 1.0 | 1.0 | HIS2        | 13590854..Histidinol phosphatase (by homolo           | orf19.6699  | 2596  | CaHIS2     | Amino acid metabolism                                                                          |
| CA4301 | 1.0 | 1.1 | 1.0 | 1.0 | 1.0 | 1.0 | IPF2593     | complemer amino acid-tRNA ligase homolog (            | orf19.6701  | 2593  | IPF2593    | PROTEIN SYNTHESIS                                                                              |
| CA4302 | 1.1 | 1.0 | 1.0 | 1.0 | 1.0 | 1.1 | DED81       | 13594793..Asparaginyl-tRNA synthetase (by lo          | orf19.6702  | 2591  | CaDED81    | PROTEIN SYNTHESIS                                                                              |

|        |     |     |     |     |     |     |              |                                                               |             |       |              |                                                                                                        |                                  |
|--------|-----|-----|-----|-----|-----|-----|--------------|---------------------------------------------------------------|-------------|-------|--------------|--------------------------------------------------------------------------------------------------------|----------------------------------|
| CA4303 | 1.0 | 1.0 | 1.0 | 0.9 | 0.9 | 1.0 | IFB1         | 13596937..unknown function                                    | orf19.6703  | 2590  | CaIFB1       | CELLULAR TRANSPORT AND TRANSPORT MECHANISMS SUBCELLULAR LOCALISATION                                   |                                  |
| CA4304 | 1.0 | 1.1 | 1.0 | 1.1 | 1.1 | 1.0 | IPF6649      | 13599850..unknown function                                    | orf19.6704  | 6649  | IPF6649      | CELL CYCLE AND DNA PROCESSING PROTEIN SYNTHESIS SUBCELLULAR LOCALISATION                               |                                  |
| CA4305 | 1.1 | 1.0 | 0.9 | 1.0 | 1.0 | 1.1 | IPF6654      | 13605657..unknown function                                    | orf19.6705  | 6654  | IPF6654      | UNCLASSIFIED PROTEINS                                                                                  | molecular_function unknown       |
| CA4306 | 1.0 | 1.0 | 0.9 | 1.0 | 0.9 | 0.9 | GYP7         | 13609552..GTPase activating protein (by homology)             | orf19.6706  | 6656  | CaGYP7       | CONTROL OF CELLULAR ORGANIZATION                                                                       | enzyme regulator activity        |
| CA4307 | 1.0 | 1.0 | 1.0 | 1.0 | 1.0 | 0.9 | IPF20013     | 13612322..Unknown function                                    | orf19.6707  | 20013 | IPF20013     | PROTEIN SYNTHESIS                                                                                      | hydrolase activity               |
| CA4308 | 1.0 | 1.0 | 1.0 | 1.0 | 1.0 | 1.0 | IPF6660      | 13613872..unknown function                                    | orf19.6708  | 6660  | IPF6660      | UNCLASSIFIED PROTEINS                                                                                  |                                  |
| CA4309 | 1.0 | 0.9 | 0.9 | 0.9 | 0.8 | 1.0 | IPF2127.3    | 13616446..unknown function, 3-prime end                       | orf19.4117  | 2127  | IPF2127.3    | No significant S.c. match                                                                              |                                  |
| CA4310 | 0.9 | 1.0 | 0.9 | 0.9 | 1.0 | 0.9 | IPF2125      | complemer unknown function                                    | orf19.4116  | 2125  | IPF2125      | UNCLASSIFIED PROTEINS                                                                                  |                                  |
| CA4311 | 1.0 | 1.0 | 0.9 | 1.1 | 1.0 | 0.9 | FAA23        | 13620672..Long-chain-fatty-acid--CoA ligase                   | orf19.4114  | 2123  | CaFAA23      | Lipid fatty-acid and isoprenoid metabolism ""CELLULAR TRANSPORT AND TRANSPORT MECHANISMS               |                                  |
| CA4312 | 1.0 | 1.0 | 0.9 | 1.0 | 1.1 | 1.0 | IPF2122      | complemer similar to thiamin pyrophosphokine                  | orf19.4112  | 2122  | IPF2122      | Metabolism of vitamins cofactors and prosthetic groups                                                 | molecular_function unknown       |
| CA4313 | 0.9 | 1.0 | 0.9 | 1.1 | 1.0 | 1.0 | IPF2121      | 13624191..unknown function                                    | orf19.4110  | 2121  | IPF2121      | CELL CYCLE AND DNA PROCESSING SUBCELLULAR LOCALISATION                                                 |                                  |
| CA4314 | 0.9 | 0.9 | 1.0 | 1.1 | 1.0 | 1.0 | PMT4         | 13627689..Mannosyltransferase (by homology)                   | orf19.4109  | 2115  | CaPMT4       | C-compound and carbohydrate metabolism ""PROTEIN FATE [folding modification destination]               | transferase activity             |
| CA4315 | 1.0 | 0.9 | 1.0 | 1.0 | 1.0 | 1.0 | PPX1         | 13630268..Exopolyphosphatase (by homology)                    | orf19.4107  | 2112  | CaPPX1       | Phosphate metabolism SUBCELLULAR LOCALISATION                                                          | hydrolase activity               |
| CA4316 | 1.0 | 1.0 | 1.1 | 1.0 | 1.0 | 1.0 | IPF2111      | complemer unknown function                                    | orf19.4106  | 2111  | IPF2111      | UNCLASSIFIED PROTEINS                                                                                  | molecular_function unknown       |
| CA4317 | 0.9 | 1.0 | 1.0 | 1.0 | 1.0 | 0.9 | IPF2109      | 13632715..unknown function                                    | orf19.4105  | 2109  | IPF2109      | UNCLASSIFIED PROTEINS                                                                                  | molecular_function unknown       |
| CA4318 | 0.9 | 1.0 | 1.0 | 1.0 | 1.0 | 1.0 | IPF2106      | complemer unknown function                                    | orf19.4104  | 2106  | IPF2106      | No significant S.c. match                                                                              |                                  |
| CA4319 | 1.0 | 1.1 | 1.1 | 1.0 | 1.1 | 1.0 | RPN10        | complemer Protein degradation (by homology)                   | orf19.4102  | 2104  | CaRPN10      | PROTEIN FATE [folding modification destination] ""SUBCELLULAR LOCALISATION                             | peptidase activity               |
| CA4320 | 1.0 | 1.0 | 1.0 | 1.0 | 1.0 | 1.1 | ECM17        | complemer Putative sulfite reductase (by homology)            | orf19.4099  | 2102  | CaECM17      | Amino acid metabolism Nitrogen and sulphur metabolism CONTROL OF TRANSPORT                             | transporter activity             |
| CA4321 | 1.0 | 0.9 | 1.0 | 1.0 | 0.9 | 1.1 | KAR3.53      | 13639735..Kinesin-related protein, internal fragment          | orf19.4100  | 2100  | CaKAR3.53    | CELL CYCLE AND DNA PROCESSING ""PROTEIN FATE [folding modification destination]                        | motor activity                   |
| CA4322 | 0.9 | 0.9 | 1.0 | 1.0 | 1.0 | 1.0 | IPF2097      | complemer unknown function                                    | orf19.4097  | 2097  | IPF2097      | TRANSCRIPTION                                                                                          |                                  |
| CA4323 | 1.0 | 1.1 | 1.0 | 1.0 | 0.9 | 0.9 | IPF2096      | complemer putative acyltransferase (by homology)              | orf19.4096  | 2096  | IPF2096      | CLASSIFICATION NOT YET CLEAR-CUT                                                                       | transferase activity             |
| CA4324 | 1.0 | 1.0 | 0.9 | 0.9 | 0.9 | 0.9 | IPF2095      | complemer unknown function                                    | orf19.4095  | 2095  | IPF2095      | No significant S.c. match                                                                              |                                  |
| CA4325 | 1.0 | 1.0 | 1.1 | 1.1 | 0.9 | 1.0 | IPF2094      | 13646015..unknown function                                    | orf19.4094  | 2094  | IPF2094      | No significant S.c. match                                                                              |                                  |
| CA4326 | 1.1 | 1.2 | 1.1 | 1.0 | 1.1 | 1.0 | IPF2093      | 13646785..nuclear protein of unknown function                 | orf19.4093  | 2093  | IPF2093      | UNCLASSIFIED PROTEINS                                                                                  | molecular_function unknown       |
| CA4327 | 1.0 | 1.0 | 1.0 | 1.0 | 1.0 | 1.0 | IPF2091      | 13648774..unknown function                                    | orf19.4092  | 2091  | IPF2091      | UNCLASSIFIED PROTEINS                                                                                  | molecular_function unknown       |
| CA4328 | 1.1 | 1.1 | 1.0 | 1.0 | 1.0 | 1.0 | IPF2090      | complemer similar to Saccharomyces cerevisiae                 | orf19.4091  | 2090  | IPF2090      | TRANSCRIPTION SUBCELLULAR LOCALISATION                                                                 | transcription regulator activity |
| CA4329 | 1.0 | 1.0 | 1.0 | 1.1 | 0.9 | 1.0 | VMA21        | complemer Vacuolar H+-ATPase assembly (by homology)           | orf19.4090  | 2089  | CaVMA21      | PROTEIN FATE [folding modification destination] ""SUBCELLULAR LOCALISATION                             | molecular_function unknown       |
| CA4330 | 1.0 | 1.0 | 1.1 | 1.0 | 1.0 | 1.0 | IPF2087      | 13651418..unknown function                                    | orf19.4090  | 2087  | IPF2087      | UNCLASSIFIED PROTEINS                                                                                  |                                  |
| CA4331 | 1.0 | 1.0 | 1.0 | 0.9 | 0.9 | 0.9 | IPF2086      | 13653176..unknown function                                    | orf19.4089  | 2086  | IPF2086      | CELL CYCLE AND DNA PROCESSING ""PROTEIN FATE [folding modification destination]                        | chaperone activity               |
| CA4332 | 1.0 | 1.1 | 1.1 | 1.0 | 1.0 | 1.0 | GLO2         | 13654688..Glyoxalase II (hydroxyacylglutathione transferase)  | orf19.4088  | 2085  | CaGLO2       | Amino acid metabolism SUBCELLULAR LOCALISATION                                                         | hydrolase activity               |
| CA4333 | 1.0 | 1.1 | 1.0 | 1.0 | 0.9 | 0.9 | IPF2083      | complemer unknown function                                    | orf19.4086  | 2083  | IPF2083      | UNCLASSIFIED PROTEINS                                                                                  | molecular_function unknown       |
| CA4334 | 1.0 | 0.9 | 1.0 | 0.9 | 0.9 | 1.0 | IPF2082      | 13656458..unknown function                                    | orf19.4085  | 2082  | IPF2082      | CELL RESCUE DEFENSE AND VIRULENCE ""TRANSPORT FACILITATION                                             |                                  |
| CA4335 | 1.1 | 1.1 | 1.0 | 1.0 | 1.0 | 1.0 | GAL83        | 13657376..Glucose repression protein (by homology)            | orf19.4084  | 2079  | CaGAL83      | C-compound and carbohydrate metabolism TRANSCRIPTION                                                   | protein kinase activity          |
| CA4336 | 1.2 | 1.2 | 4.4 | 5.4 | 2.2 | 3.2 | DDR48        | complemer stress protein (by homology)                        | orf19.4082  | 2075  | CaDDR48      | CELL RESCUE DEFENSE AND VIRULENCE ""UNCLASSIFIED PROTEINS                                              |                                  |
| CA4337 | 1.0 | 0.9 | 1.0 | 1.0 | 1.0 | 1.0 | IPF2071      | complemer unknown function                                    | orf19.4079  | 2071  | IPF2071      | No significant S.c. match                                                                              |                                  |
| CA4338 | 1.0 | 1.0 | 1.0 | 1.0 | 1.0 | 0.9 | IPF3616      | 13666944..Unknown function                                    | orf19.6709  | 3616  | IPF3616      | UNCLASSIFIED PROTEINS                                                                                  | molecular_function unknown       |
| CA4339 | 1.1 | 1.0 | 1.0 | 1.1 | 1.0 | 1.0 | IPF3618      | complemer Unknown function                                    | orf19.6710  | 3618  | IPF3618      | UNCLASSIFIED PROTEINS                                                                                  |                                  |
| CA4340 | 1.0 | 0.9 | 0.9 | 1.1 | 1.1 | 1.1 | IPF3621      | complemer unknown function                                    | orf19.6712  | 3621  | IPF3621      | CLASSIFICATION NOT YET CLEAR-CUT                                                                       | molecular_function unknown       |
| CA4341 | 0.9 | 1.0 | 1.0 | 1.0 | 0.9 | 1.0 | IPF3624      | complemer unknown function                                    | orf19.6713  | 3624  | IPF3624      | No significant S.c. match                                                                              |                                  |
| CA4342 | 1.0 | 1.2 | 0.9 | 1.1 | 1.0 | 1.0 | IPF3629      | complemer RNA (guanine-N7-) mRNA (guanine-N7-) mRNA           | orf19.6716  | 3629  | IPF3629      | TRANSCRIPTION SUBCELLULAR LOCALISATION                                                                 | transferase activity             |
| CA4343 | 0.9 | 1.0 | 1.0 | 1.0 | 1.0 | 1.0 | IPF3630      | complemer unknown function                                    | orf19.6717  | 3630  | IPF3630      | UNCLASSIFIED PROTEINS                                                                                  | molecular_function unknown       |
| CA4344 | 0.9 | 1.0 | 1.0 | 1.0 | 1.0 | 1.0 | IPF3631      | 13680189..unknown function                                    | orf19.6718  | 3631  | IPF3631      | No significant S.c. match                                                                              |                                  |
| CA4345 | 1.1 | 1.0 | 1.0 | 1.1 | 1.0 | 1.1 | IPF3633.3    | complemer similar to Saccharomyces cerevisiae                 | orf19.6719  | 3633  | IPF3633.3    | CELL CYCLE AND DNA PROCESSING TRANSCRIPTION                                                            | transcription regulator activity |
| CA4346 | 0.9 | 0.9 | 0.8 | 0.7 | 0.9 | 1.0 | IPF3634      | complemer unknown function                                    | orf19.6720  | 3634  | IPF3634      | UNCLASSIFIED PROTEINS                                                                                  | molecular_function unknown       |
| CA4347 | 1.0 | 1.1 | 1.2 | 1.0 | 1.1 | 1.0 | IPF3636      | complemer similar to Saccharomyces cerevisiae                 | orf19.6722  | 3636  | IPF3636      | CELL CYCLE AND DNA PROCESSING SUBCELLULAR LOCALISATION                                                 | DNA binding                      |
| CA4348 | 1.0 | 1.0 | 1.0 | 1.0 | 1.1 | 1.0 | IPF3638      | 13689201..unknown function                                    | orf19.6723  | 3638  | IPF3638      | UNCLASSIFIED PROTEINS                                                                                  |                                  |
| CA4349 | 1.1 | 1.1 | 1.0 | 0.9 | 1.0 | 1.0 | FUM12.5F     | 13691337..Fumarate hydratase, 5-prime end                     | orf19.6724  | 3640  | CaFUM12      | ENERGY SUBCELLULAR LOCALISATION                                                                        |                                  |
| CA4350 | 1.0 | 1.0 | 1.0 | 1.0 | 0.9 | 0.9 | FUM12.53F    | 13692040..Fumarate hydratase, internal fragment (by homology) | orf19.6725  | 18225 | CaFUM12      | ENERGY SUBCELLULAR LOCALISATION                                                                        |                                  |
| CA4351 | 1.1 | 1.1 | 1.0 | 1.1 | 1.0 | 1.0 | FUM12.3F     | 13692234..Fumarate hydratase, 3-prime end                     | orf19.6725  | 3641  | CaFUM12      | ENERGY SUBCELLULAR LOCALISATION                                                                        |                                  |
| CA4352 | 1.0 | 1.0 | 1.0 | 1.1 | 1.0 | 1.0 | IPF3642      | 13693048..Unknown function                                    | orf19.6726  | 3642  | IPF3642      | TRANSCRIPTION SUBCELLULAR LOCALISATION                                                                 | DNA binding                      |
| CA4353 | 1.1 | 0.9 | 1.0 | 0.9 | 1.0 | 1.1 | IPF3645      | 13694115..similar to Saccharomyces cerevisiae                 | orf19.6727  | 3645  | IPF3645      | TRANSCRIPTION                                                                                          | transferase activity             |
| CA4354 | 1.1 | 1.1 | 1.0 | 1.1 | 1.1 | 1.1 | IPF3647      | complemer unknown function                                    | orf19.6729  | 3647  | IPF3647      | TRANSCRIPTION PROTEIN SYNTHESIS                                                                        |                                  |
| CA4355 | 1.0 | 1.0 | 1.0 | 1.0 | 1.0 | 1.0 | IPF3649      | complemer unknown function                                    | orf19.6730  | 3649  | IPF3649      | UNCLASSIFIED PROTEINS                                                                                  | molecular_function unknown       |
| CA4356 | 1.1 | 0.9 | 1.0 | 1.0 | 1.0 | 1.1 | IPF3651      | complemer unknown function                                    | orf19.6730  | 3651  | IPF3651      | No significant S.c. match                                                                              |                                  |
| CA4357 | 0.9 | 0.9 | 1.0 | 1.1 | 0.9 | 1.0 | IPF19800     | 13701331..unknown function                                    | orf19.6732  | 19800 | IPF19800     | UNCLASSIFIED PROTEINS                                                                                  | molecular_function unknown       |
| CA4358 | 1.0 | 1.0 | 1.0 | 1.0 | 0.9 | 1.1 | IPF6067      | complemer putative transcription factor (by homology)         | orf19.6734  | 6067  | IPF6067      | TRANSCRIPTION SUBCELLULAR LOCALISATION                                                                 |                                  |
| CA4359 | 0.9 | 0.9 | 1.0 | 0.9 | 0.9 | 1.0 | IPF6054      | 13713281..unknown function                                    | orf19.6736  | 6054  | IPF6054      | UNCLASSIFIED PROTEINS                                                                                  | molecular_function unknown       |
| CA4360 | 1.0 | 1.0 | 1.0 | 0.9 | 1.0 | 1.0 | IPF6050      | 13717654..unknown function                                    | orf19.6737  | 6050  | IPF6050      | No significant S.c. match                                                                              |                                  |
| CA4361 | 1.1 | 1.1 | 1.0 | 1.1 | 0.9 | 1.0 | IPF16104     | 13723251..unknown function                                    | orf19.13091 | 16104 | IPF16104     | TRANSCRIPTION                                                                                          | molecular_function unknown       |
| CA4362 | 1.2 | 1.6 | 0.8 | 0.7 | 0.7 | 1.1 | ATP2         | 13726192..F1F0-ATPase complex, F1 beta subunit                | orf19.5653  | 5264  | CaATP2       | ENERGY CELLULAR TRANSPORT AND TRANSPORT MECHANISMS                                                     | transporter activity             |
| CA4363 | 1.0 | 0.9 | 1.0 | 1.0 | 1.0 | 1.1 | STE24        | 13728012..zinc metallo-protease by homology                   | orf19.5654  | 5265  | CaSTE24      | PROTEIN FATE [folding modification destination] ""CELL FATE SUBCELLULAR LOCALISATION                   | peptidase activity               |
| CA4364 | 1.0 | 0.9 | 1.0 | 1.0 | 1.0 | 1.0 | IPF5268.EXO1 | complemer choline monooxygenase, exon 2 (orf19.5655)          | orf19.5655  | 5266  | IPF5268.EXO1 | No significant S.c. match                                                                              |                                  |
| CA4365 | 1.0 | 1.1 | 1.0 | 1.0 | 1.0 | 1.0 | IPF5268.EXO1 | complemer choline monooxygenase, exon 1 (orf19.5656)          | orf19.5656  | 5268  | IPF5268.EXO1 | No significant S.c. match                                                                              |                                  |
| CA4366 | 1.0 | 1.0 | 0.9 | 1.0 | 0.9 | 1.0 | SWI1         | complemer Transcription regulation by homology                | orf19.5657  | 5271  | CaSWI1       | C-compound and carbohydrate metabolism TRANSCRIPTION CELL FATE                                         | transcription regulator activity |
| CA4367 | 0.9 | 1.0 | 1.1 | 0.9 | 1.0 | 0.9 | MNN10        | complemer galactosyltransferase (by homology)                 | orf19.5658  | 5272  | CaMNN10      | C-compound and carbohydrate metabolism ""PROTEIN FATE [folding modification destination]               | transferase activity             |
| CA4368 | 1.0 | 0.9 | 1.0 | 1.1 | 1.0 | 1.0 | PEX10.3      | complemer peroxisomal assembly protein, 3-pore domain         | orf19.5660  | 5275  | CaPEX10.3    | PROTEIN FATE [folding modification destination] ""SUBCELLULAR LOCALISATION                             | protein binding                  |
| CA4369 | 1.0 | 0.9 | 1.0 | 1.0 | 1.0 | 1.0 | TIM11        | complemer subunit e of mitochondrial F1F0-ATPase by homology  | orf19.5661  | 5277  | CaTIM11      | ENERGY ""PROTEIN FATE [folding modification destination] ""CELLULAR TRANSPORT AND TRANSPORT MECHANISMS |                                  |
| CA4370 | 0.9 | 1.1 | 0.9 | 1.0 | 1.0 | 1.0 | IPF5279      | 13737863..unknown function                                    | orf19.5661  | 5279  | IPF5279      | ENERGY SUBCELLULAR LOCALISATION                                                                        | protein phosphatase activity     |
| CA4371 | 1.0 | 1.0 | 1.0 | 1.0 | 1.0 | 1.0 | PEP7         | 13739024..vacuolar segregation protein by homology            | orf19.5662  | 5281  | CaPEP7       | PROTEIN FATE [folding modification destination] ""CELLULAR TRANSPORT AND TRANSPORT MECHANISMS          | molecular_function unknown       |
| CA4372 | 1.0 | 1.0 | 1.0 | 0.9 | 1.0 | 0.9 | IPF5282      | complemer unknown function                                    | orf19.5663  | 5282  | IPF5282      | UNCLASSIFIED PROTEINS                                                                                  | transporter activity             |
| CA4373 | 0.9 | 1.1 | 1.0 | 1.0 | 1.1 | 1.0 | IPF5287      | 13742925..signal transduction protein (by homology)           | orf19.5664  | 5287  | IPF5287      | CELL CYCLE AND DNA PROCESSING SUBCELLULAR LOCALISATION                                                 | protein binding                  |
| CA4374 | 0.8 | 0.9 | 1.0 | 1.0 | 1.0 | 0.9 | IPF5288      | 13744929..Unknown function                                    | orf19.5665  | 5288  | IPF5288      | UNCLASSIFIED PROTEINS                                                                                  | molecular_function unknown       |

|        |     |     |     |     |     |     |            |                                                            |            |       |            |                                                                                              |                                      |
|--------|-----|-----|-----|-----|-----|-----|------------|------------------------------------------------------------|------------|-------|------------|----------------------------------------------------------------------------------------------|--------------------------------------|
| CA4375 | 1.1 | 1.0 | 1.0 | 1.0 | 1.1 | 1.0 | IPF11309   | 13746058..unknown function                                 | orf19.5666 | 11309 | IPF11309   | TRANSCRIPTION SUBCELLULAR LOCALISATION                                                       | transcription regulator activity     |
| CA4376 | 1.0 | 1.0 | 1.0 | 1.0 | 1.0 | 0.9 | IPF11307   | 13747288..unknown function                                 | orf19.5667 | 11307 | IPF11307   | CELL RESCUE DEFENSE AND VIRULENCE ""REGULATION OF/INTEI                                      | transporter activity                 |
| CA4377 | 1.1 | 1.0 | 1.0 | 1.0 | 1.0 | 1.0 | IPF11301   | 13744902..unknown function                                 | orf19.5669 | 11301 | IPF11301   | SUBCELLULAR LOCALISATION                                                                     |                                      |
| CA4378 | 1.0 | 1.1 | 0.9 | 0.9 | 1.0 | 1.0 | IPF11299   | complemer unknown function                                 | orf19.5671 | 11299 | IPF11299   | UNCLASSIFIED PROTEINS                                                                        | molecular_function unknown           |
| CA4379 | 1.1 | 1.1 | 1.1 | 0.9 | 1.0 | 0.9 | MEP2       | 13754336..high affinity low capacity ammonia               | orf19.5672 | 12738 | CaMEP2     | CELLULAR TRANSPORT AND TRANSPORT MECHANISMS SUBCELL                                          | transporter activity                 |
| CA4380 | 0.9 | 0.9 | 1.0 | 1.0 | 1.0 | 1.0 | IPF12736   | complemer unknown function                                 | orf19.5673 | 12736 | IPF12736   | TRANSPORT FACILITATION                                                                       |                                      |
| CA4381 | 1.0 | 0.9 | 0.9 | 1.1 | 1.0 | 0.8 | IPF20169   | complemer unknown function                                 | orf19.5674 | 20169 | IPF20169   | No significant S.c. match                                                                    |                                      |
| CA4382 | 0.9 | 1.0 | 1.0 | 1.0 | 1.0 | 1.1 | IPF8576    | complemer similar to Saccharomyces cerevisi                | orf19.5675 | 8576  | IPF8576    | UNCLASSIFIED PROTEINS                                                                        | hydrolase activity                   |
| CA4383 | 0.9 | 1.0 | 1.0 | 1.0 | 1.0 | 0.9 | IPF8573    | complemer unknown function                                 | orf19.1312 | 8573  | IPF8573    | UNCLASSIFIED PROTEINS                                                                        | molecular_function unknown           |
| CA4384 | 1.0 | 0.9 | 1.1 | 1.1 | 1.0 | 1.0 | DUR34      | 13767917..Urea transport protein (by homolo                | orf19.1312 | 8570  | CaDUR34    | REGULATION OF/INTERACTION WITH CELLULAR ENVIRONMENT SUBCELLULAR LOCALISATION TF              |                                      |
| CA4385 | 1.1 | 1.0 | 1.1 | 1.0 | 1.1 | 1.1 | CCT6       | complemer component of chaperonin-containi                 | orf19.3126 | 14978 | CaCCT6     | PROTEIN FATE [folding modification destination] ""SUBCELLULAR LOC                            | chaperone activity                   |
| CA4386 | 1.1 | 1.0 | 1.0 | 1.0 | 1.0 | 0.9 | IPF12412   | 13777240..unknown function                                 | orf19.3125 | 12412 | IPF12412   | TRANSCRIPTION SUBCELLULAR LOCALISATION                                                       |                                      |
| CA4387 | 1.0 | 1.1 | 1.1 | 1.0 | 1.0 | 1.0 | MAP1       | complemer methionine aminopeptidase, isofor                | orf19.3124 | 12414 | CaMAP1     | PROTEIN FATE [folding modification destination] ""SUBCELLULAR LOC                            | peptidase activity                   |
| CA4388 | 1.1 | 1.1 | 1.0 | 1.0 | 1.1 | 1.0 | IPF12416.3 | complemer cytidine deaminase, 3-prime end (by homolog      |            | 12416 | IPF12416.3 | Nucleotide metabolism                                                                        | hydrolase activity                   |
| CA4389 | 1.0 | 0.9 | 1.0 | 0.9 | 1.0 | 1.0 | RPT5       | 13780287..26S proteasome regulatory subun                  | orf19.3123 | 12419 | CaRPT5     | PROTEIN FATE [folding modification destination] ""SUBCELLULAR LOC                            | peptidase activity                   |
| CA4390 | 1.0 | 1.1 | 1.0 | 0.9 | 1.0 | 1.0 | HOD1       | complemer regulator of G2/M progression (by homology)      |            | 12420 | CaHOD1     | No significant S.c. match                                                                    |                                      |
| CA4391 | 1.0 | 0.9 | 1.0 | 1.1 | 1.0 | 0.9 | ARR3       | 13782944..involved in arsenite transport (by horf          | orf19.3122 | 12422 | CaARR3     | SUBCELLULAR LOCALISATION TRANSPORT FACILITATION                                              | transporter activity                 |
| CA4392 | 1.0 | 1.0 | 1.0 | 1.0 | 1.0 | 0.9 | IPF12303   | 13784434..glutathione-S-transferase (by hom                | orf19.3121 | 12303 | IPF12303   | Nitrogen and sulphur metabolism                                                              |                                      |
| CA4393 | 0.9 | 1.1 | 0.9 | 0.9 | 1.0 | 1.0 | IPF12300   | 13785662..unknown function                                 | orf19.3120 | 12300 | IPF12300   | TRANSPORT FACILITATION                                                                       |                                      |
| CA4394 | 0.8 | 0.7 | 0.6 | 0.5 | 0.8 | 0.5 | IPF12297   | complemer mycelial surface antigen (by homo                | orf19.3117 | 12297 | IPF12297   | No significant S.c. match                                                                    |                                      |
| CA4395 | 0.9 | 1.0 | 1.0 | 0.9 | 1.0 | 0.9 | EXM2       | complemer EXit from Mitosis (by homology)                  | orf19.3116 | 12295 | CaEXM2     | TRANSCRIPTION                                                                                | RNA binding                          |
| CA4396 | 1.0 | 1.0 | 1.0 | 1.0 | 1.0 | 1.0 | IPF12294   | complemer unknown function                                 | orf19.3115 | 12294 | IPF12294   | SUBCELLULAR LOCALISATION                                                                     |                                      |
| CA4397 | 1.1 | 1.1 | 1.0 | 1.0 | 1.0 | 1.1 | IPF14369   | 13791307..unknown function                                 | orf19.3114 | 14369 | IPF14369   | Nucleotide metabolism                                                                        | lyase activity                       |
| CA4398 | 1.3 | 1.3 | 1.1 | 1.3 | 1.1 | 0.8 | ZRT1       | complemer high-affinity zinc transport protein (orf19.3112 |            | 14367 | CaZRT1     | REGULATION OF/INTERACTION WITH CELLULAR ENVIRONMENT TRANSPORT FACILITATION                   |                                      |
| CA4399 | 1.9 | 3.6 | 1.6 | 1.7 | 1.2 | 1.4 | PRA1       | 13794736..pH-regulated antigen pH-regulat                  | orf19.3111 | 14364 | CaPRA1     | UNCLASSIFIED PROTEINS                                                                        | molecular_function unknown           |
| CA4400 | 0.9 | 0.9 | 1.1 | 1.2 | 1.0 | 1.0 | IPF14362   | 13796197..unknown function                                 | orf19.3110 | 8781  | IPF14362   | UNCLASSIFIED PROTEINS                                                                        |                                      |
| CA4401 | 1.0 | 1.1 | 1.1 | 1.1 | 1.1 | 1.0 | IPF8780    | 13798417..unknown function                                 | orf19.3109 | 8780  | IPF8780    | No significant S.c. match                                                                    |                                      |
| CA4402 | 1.0 | 1.1 | 1.0 | 1.0 | 1.0 | 0.9 | MGT1       | complemer O6-methylguanine DNA repair me                   | orf19.3108 | 8778  | CaMGT1     | CELL CYCLE AND DNA PROCESSING SUBCELLULAR LOCALISATIO                                        | DNA binding                          |
| CA4403 | 1.0 | 1.0 | 1.0 | 1.1 | 0.9 | 1.0 | IPF8777    | complemer unknown function                                 | orf19.3107 | 8777  | IPF8777    | No significant S.c. match                                                                    |                                      |
| CA4404 | 1.0 | 1.0 | 1.1 | 1.0 | 1.1 | 1.1 | MET16      | 13801316..3-phosphoadenylylsulfate reducta                 | orf19.3106 | 8775  | CaMET16    | Amino acid metabolism Nitrogen and sulphur metabolism                                        | oxidoreductase activity              |
| CA4405 | 1.0 | 0.9 | 1.1 | 1.0 | 1.0 | 1.0 | IPF8773    | 13802252..putative cytochrome P450 (by hom                 | orf19.3105 | 8773  | IPF8773    | CELL RESCUE DEFENSE AND VIRULENCE ""CELL FATE CONTROL OF CELLULAR ORGANIZATION               |                                      |
| CA4406 | 1.1 | 1.1 | 1.1 | 1.1 | 1.0 | 1.0 | YDC1       | 13804150..alkaline dihydroceramidase (by ho                | orf19.3104 | 8772  | CaYDC1     | Lipid fatty-acid and isoprenoid metabolism                                                   | hydrolase activity                   |
| CA4407 | 1.0 | 1.0 | 1.0 | 1.0 | 1.1 | 1.2 | RPO31      | 13805409..DNA-directed RNA polymerase III                  | orf19.3103 | 13155 | CaRPO31    | TRANSCRIPTION SUBCELLULAR LOCALISATION                                                       | nucleotidyltransferase activity      |
| CA4408 | 1.1 | 1.1 | 1.0 | 1.0 | 1.0 | 0.9 | CTA6.3     | 13809882..unknown function, 3-pr CTA6p [Ca                 | orf19.3102 | 13152 | CaCTA6.3   | No significant S.c. match                                                                    |                                      |
| CA4409 | 1.0 | 1.0 | 1.0 | 1.0 | 1.0 | 1.0 | IPF13151   | complemer unknown function                                 | orf19.3100 | 13151 | IPF13151   | CELLULAR TRANSPORT AND TRANSPORT MECHANISMS SUBCELLULAR LOCALISATION                         |                                      |
| CA4410 | 1.0 | 1.0 | 0.9 | 1.0 | 1.1 | 0.9 | TRP4       | complemer Anthranilate phosphoribosyltransfe               | orf19.3099 | 1754  | CaTRP4     | Amino acid metabolism SUBCELLULAR LOCALISATION                                               | transferase activity                 |
| CA4411 | 1.0 | 1.0 | 1.0 | 0.9 | 1.0 | 1.0 | BRR2       | complemer RNA helicase-related protein (by horf            | orf19.3098 | 1751  | CaBRR2     | TRANSCRIPTION SUBCELLULAR LOCALISATION UNCLASSIFIED PF RNA binding,helicase activity         |                                      |
| CA4412 | 1.0 | 1.0 | 1.0 | 1.0 | 1.1 | 1.0 | PDA1       | complemer Pyruvate dehydrogenase alpha ch                  | orf19.3097 | 1749  | CaPDA1     | C-compound and carbohydrate metabolism ENERGY SUBCELLULAR L                                  | oxidoreductase activity              |
| CA4413 | 0.9 | 1.0 | 1.0 | 1.1 | 1.0 | 1.0 | MSH2       | complemer DNA mismatch repair protein (by horf             | orf19.3093 | 1746  | CaMSH2     | CELL CYCLE AND DNA PROCESSING SUBCELLULAR LOCALISATIO                                        | DNA binding                          |
| CA4415 | 1.0 | 1.0 | 1.0 | 1.0 | 1.0 | 1.0 | HIK1.3EOC  | 13826051..histidine kinase, 3-prime end                    |            | 11890 | CaHIK1.3e  | CELL CYCLE AND DNA PROCESSING TRANSCRIPTION CELLULAR COMMUNICATION/SIGNAL TRAN               |                                      |
| CA4416 | 1.0 | 1.0 | 1.1 | 1.2 | 1.0 | 1.0 | IPF11888   | 13830957..unknown function                                 | orf19.5180 | 11888 | IPF11888   | CELL RESCUE DEFENSE AND VIRULENCE                                                            | oxidoreductase activity              |
| CA4417 | 1.0 | 1.0 | 1.0 | 1.0 | 1.0 | 1.0 | LIP5       | complemer Secretory lipase secretory li                    | orf19.5179 | 5395  | CaLIP5     | Other virulence attributes                                                                   |                                      |
| CA4418 | 1.2 | 1.0 | 1.0 | 1.1 | 1.2 | 1.1 | ERG5       | complemer C-22 sterol desaturase cytochrome                | orf19.5178 | 5398  | CaERG5     | Lipid fatty-acid and isoprenoid metabolism """"CELL RESCUE DEFENSE AND VIRULENCE ""SUBCELLUL |                                      |
| CA4419 | 0.9 | 0.9 | 0.9 | 1.0 | 1.0 | 1.1 | IFA6       | 13840496..Unknown function                                 | orf19.5177 | 5401  | CaIFA6     | UNCLASSIFIED PROTEINS                                                                        |                                      |
| CA4420 | 1.0 | 1.0 | 1.0 | 1.1 | 1.0 | 1.1 | SSM4       | complemer involved in mRNA turnover by hor                 | orf19.5175 | 5404  | CaSSM4     | TRANSCRIPTION                                                                                | ligase activity                      |
| CA4421 | 0.9 | 0.9 | 1.0 | 0.9 | 1.0 | 0.9 | TAF19      | complemer TBP-associated factor by homolog                 | orf19.5174 | 5405  | CaTAF19    | TRANSCRIPTION SUBCELLULAR LOCALISATION                                                       | transcription regulator activity     |
| CA4422 | 0.9 | 1.0 | 1.0 | 0.9 | 0.8 | 1.0 | LIP9.EXON2 | complemer secretory lipase 9, exon 2                       | orf19.5173 | 5406  | CaLIP9.ex  | Other virulence attributes                                                                   |                                      |
| CA4423 | 1.0 | 1.0 | 1.1 | 1.1 | 1.0 | 1.0 | LIP9.EXON1 | complemer secretory lipase 9, exon 1                       | orf19.5172 | 5407  | CaLIP9.ex  | Other virulence attributes                                                                   |                                      |
| CA4424 | 1.0 | 1.0 | 1.0 | 1.0 | 1.0 | 1.1 | PMT1       | complemer mannosyltransferase protein mar                  | orf19.5171 | 5408  | CaPMT1     | C-compound and carbohydrate metabolism ""PROTEIN FATE [folding m                             | transferase activity                 |
| CA4425 | 1.5 | 2.4 | 1.1 | 1.1 | 1.2 | 1.4 | ENA21.3    | 13855072..P-type ATPase, 3-prime end (by h                 | orf19.5170 | 5411  | CaENA21.3  | REGULATION OF/INTERACTION WITH CELLULAR ENVIRONMENT TRANSPORT FACILITATION                   |                                      |
| CA4426 | 1.0 | 1.0 | 1.2 | 1.0 | 1.0 | 1.0 | AMD21      | 13858996..amidase (by homology)                            | orf19.5169 | 5587  | CaAMD21    | Nitrogen and sulphur metabolism                                                              |                                      |
| CA4427 | 1.0 | 1.0 | 1.0 | 1.0 | 1.1 | 1.0 | IPF5584    | complemer unknown function                                 | orf19.5168 | 5584  | IPF5584    | UNCLASSIFIED PROTEINS                                                                        | molecular_function unknown           |
| CA4428 | 1.0 | 1.0 | 1.0 | 0.9 | 1.0 | 1.0 | IFM1       | complemer translation initiation factor 2 by hor           | orf19.5167 | 5581  | CaIFM1     | PROTEIN SYNTHESIS CONTROL OF CELLULAR ORGANIZATION SL RNA binding                            |                                      |
| CA4429 | 1.1 | 0.9 | 0.9 | 1.0 | 1.0 | 0.9 | DBF4       | complemer regulatory subunit for Cdc7 by hon               | orf19.5166 | 5578  | CaDBF4     | CELL CYCLE AND DNA PROCESSING SUBCELLULAR LOCALISATIO                                        | protein kinase activity              |
| CA4430 | 1.0 | 1.0 | 1.0 | 1.0 | 1.0 | 0.9 | IPF5577    | complemer unknown function                                 | orf19.5165 | 5577  | IPF5577    | UNCLASSIFIED PROTEINS                                                                        | molecular_function unknown           |
| CA4431 | 1.1 | 1.0 | 1.0 | 1.0 | 1.0 | 1.1 | ECM39      | 13868170..cell wall biogenesis by homology                 | orf19.5164 | 5575  | CaECM39    | CONTROL OF CELLULAR ORGANIZATION                                                             | transferase activity                 |
| CA4432 | 1.0 | 1.1 | 1.0 | 1.1 | 1.0 | 1.0 | IPF5574    | complemer unknown function                                 | orf19.5163 | 5574  | IPF5574    | CELL CYCLE AND DNA PROCESSING ""CELL RESCUE DEFENSE AND                                      | molecular_function unknown           |
| CA4433 | 1.0 | 1.0 | 1.0 | 1.0 | 1.0 | 0.9 | BCK1       | 13873674..serine/threonine protein kinase of               | orf19.5162 | 5572  | CaBCK1     | CELL CYCLE AND DNA PROCESSING ""CELL RESCUE DEFENSE AND                                      | protein kinase activity,signal trans |
| CA4434 | 1.0 | 1.0 | 1.0 | 0.9 | 1.0 | 1.0 | MRPL49     | complemer ribosomal protein mitochondrial                  | orf19.5161 | 5569  | CaMRPL49   | PROTEIN SYNTHESIS SUBCELLULAR LOCALISATION                                                   | structural molecule activity         |
| CA4435 | 1.2 | 1.1 | 1.0 | 0.9 | 0.9 | 0.9 | SAP190     | 13879174..phosphatase associate hypothetica                | orf19.5160 | 5567  | CaSAP190   | CELL CYCLE AND DNA PROCESSING CELL FATE                                                      | protein phosphatase activity         |
| CA4436 | 1.1 | 1.0 | 0.9 | 0.9 | 1.0 | 1.0 | IPF13868   | complemer unknown function                                 | orf19.5159 | 13868 | IPF13868   | UNCLASSIFIED PROTEINS                                                                        | molecular_function unknown           |
| CA4437 | 1.1 | 1.0 | 1.1 | 1.0 | 1.0 | 1.0 | IPF13867   | 13883597..unknown function                                 | orf19.5158 | 13867 | IPF13867   | CELLULAR TRANSPORT AND TRANSPORT MECHANISMS SUBCELLULAR LOCALISATION                         |                                      |
| CA4438 | 1.0 | 1.0 | 1.0 | 1.0 | 1.1 | 0.9 | IPF13866   | 13884332..unknown function                                 | orf19.5157 | 13866 | IPF13866   | UNCLASSIFIED PROTEINS                                                                        |                                      |
| CA4439 | 0.9 | 1.1 | 1.0 | 1.0 | 1.0 | 1.1 | IPF13865   | 13885085..unknown function                                 | orf19.5156 | 13865 | IPF13865   | UNCLASSIFIED PROTEINS                                                                        | molecular_function unknown           |
| CA4440 | 1.0 | 1.0 | 1.0 | 1.0 | 1.0 | 1.0 | IPF13864   | complemer similar to Saccharomyc                           | orf19.5155 | 13864 | IPF13864   | C-compound and carbohydrate metabolism CELLULAR TRANSPORT A                                  | molecular_function unknown           |
| CA4441 | 1.0 | 1.0 | 1.1 | 1.0 | 1.0 | 1.2 | IPF2268.3  | complemer unknown function, 3-prime end                    |            | 2268  | IPF2268.3  | No significant S.c. match                                                                    |                                      |
| CA4442 | 1.0 | 1.0 | 1.0 | 1.0 | 1.0 | 1.0 | IPF3537    | complemer unknown function                                 | orf19.6838 | 3537  | IPF3537    | ENERGY SUBCELLULAR LOCALISATION                                                              |                                      |
| CA4443 | 1.0 | 1.1 | 1.0 | 1.0 | 1.0 | 1.0 | IPF3535    | complemer unknown function                                 | orf19.6840 | 3535  | IPF3535    | No significant S.c. match                                                                    |                                      |
| CA4444 | 0.9 | 0.8 | 0.9 | 0.9 | 1.0 | 0.9 | IPF3533    | complemer putative GDP/GTP exchange fact                   | orf19.6842 | 3533  | IPF3533    | UNCLASSIFIED PROTEINS                                                                        | enzyme regulator activity            |
| CA4445 | 0.9 | 0.5 | 0.9 | 0.9 | 0.9 | 0.9 | IPF3530    | 13913089..unknown function                                 | orf19.6843 | 3530  | IPF3530    | No significant S.c. match                                                                    |                                      |
| CA4446 | 1.0 | 1.0 | 0.9 | 1.0 | 1.0 | 1.0 | ICL1       | 13915305..Isocitrate lyase isocitrate ly                   | orf19.6844 | 3527  | CaICL1     | C-compound and carbohydrate metabolism ENERGY SUBCELLULAR L                                  | lyase activity                       |
| CA4447 | 1.0 | 1.0 | 1.0 | 1.0 | 1.0 | 0.9 | IPF3523    | 13917397..unknown function                                 | orf19.6845 | 3523  | IPF3523    | UNCLASSIFIED PROTEINS                                                                        |                                      |

|        |     |     |     |     |     |     |            |                                                            |                |                                                                                            |                                  |
|--------|-----|-----|-----|-----|-----|-----|------------|------------------------------------------------------------|----------------|--------------------------------------------------------------------------------------------|----------------------------------|
| CA4448 | 1.0 | 1.1 | 1.0 | 0.9 | 1.0 | 0.9 | PHO85      | complemer Negative regulator of F negative re orf19.6846   | 3522 CaPHO85   | Phosphate metabolism C-compound and carbohydrate metabolism ENEn                           | protein kinase activity          |
| CA4449 | 0.8 | 0.9 | 0.9 | 1.0 | 1.0 | 1.0 | IPF3520    | complemer unknown function orf19.6847                      | 3520 IPF3520   | UNCLASSIFIED PROTEINS                                                                      | molecular_function unknown       |
| CA4450 | 1.0 | 1.0 | 1.0 | 1.0 | 1.0 | 1.0 | IPF3518    | complemer similar to Saccharomyces cerevisi orf19.6848     | 3518 IPF3518   | PROTEIN FATE [folding modification destination] ""CELLULAR TRANSP                          | molecular_function unknown       |
| CA4451 | 0.9 | 1.0 | 1.1 | 0.9 | 1.0 | 1.0 | ELC1       | 13925378..Transcription elongation factor (by orf19.6849   | 3516 CaELC1    | CELL CYCLE AND DNA PROCESSING TRANSCRIPTION CELL FATE                                      | transcription regulator activity |
| CA4452 | 1.1 | 1.0 | 1.0 | 1.0 | 1.0 | 0.9 | IPF3514    | 13926226..unknown function orf19.6850                      | 3514 IPF3514   | UNCLASSIFIED PROTEINS                                                                      | molecular_function unknown       |
| CA4453 | 1.0 | 0.9 | 1.0 | 1.0 | 1.0 | 0.9 | CHL4       | complemer chromosome segregation protein (orf19.6851       | 15162 CaCHL4   | CELL CYCLE AND DNA PROCESSING SUBCELLULAR LOCALISATIO                                      | DNA binding                      |
| CA4454 | 1.0 | 1.0 | 1.0 | 1.0 | 1.0 | 0.9 | IPF15160   | complemer unknown function orf19.6852                      | 15160 IPF15160 | UNCLASSIFIED PROTEINS                                                                      | molecular_function unknown       |
| CA4455 | 1.0 | 1.0 | 1.0 | 1.0 | 1.0 | 1.0 | IPF8454    | complemer unknown function orf19.6853                      | 8454 IPF8454   | No significant S.c. match                                                                  |                                  |
| CA4456 | 1.0 | 1.1 | 1.0 | 1.0 | 1.0 | 1.0 | ATP1.EXON2 | 13935906..F1F0-ATPase complex, F1 alpha subunit, exo       | 8458 CaATP1.e  | ENERGY CELLULAR TRANSPORT AND TRANSPORT MECHANISMS REGULATION OF/INTERACTION               |                                  |
| CA4457 | 1.3 | 1.9 | 0.9 | 0.7 | 0.9 | 0.9 | ATP1.EXON3 | 13936228..F1F0-ATPase complex, F1 alpha orf19.6854         | 8460 CaATP1.e  | ENERGY CELLULAR TRANSPORT AND TRANSPORT MECHANISMS                                         | transporter activity             |
| CA4458 | 1.0 | 1.1 | 1.0 | 1.0 | 1.0 | 1.1 | IPF8464    | 13938534..unknown function orf19.6855                      | 8464 IPF8464   | No significant S.c. match                                                                  |                                  |
| CA4459 | 1.0 | 1.0 | 1.0 | 1.1 | 1.0 | 1.0 | NSP49.3F   | complemer nucleoporin, 3-prime end (by homorf19.6856       | 8467 CaNSP49.3 | TRANSCRIPTION CELLULAR TRANSPORT AND TRANSPORT MECH                                        | structural molecule activity     |
| CA4460 | 1.0 | 0.9 | 0.9 | 1.0 | 1.0 | 1.1 | NSP49.5F   | complemer nuclear pore protein, 5-prime end orf19.6857     | 8469 CaNSP49.5 | No significant S.c. match                                                                  |                                  |
| CA4461 | 1.0 | 1.0 | 1.0 | 1.0 | 0.9 | 1.0 | IPF8470    | complemer unknown function orf19.6858                      | 8470 IPF8470   | UNCLASSIFIED PROTEINS                                                                      | molecular_function unknown       |
| CA4462 | 1.0 | 1.1 | 1.0 | 1.0 | 1.0 | 1.1 | IPF17251   | complemer unknown function orf19.6859                      | 17251 IPF17251 | No significant S.c. match                                                                  |                                  |
| CA4463 | 1.0 | 1.1 | 1.0 | 0.9 | 1.0 | 1.0 | PIS1       | 13947475..CDP diacylglycerol--inositol 3-phosorf19.6860    | 9827 CaPIS1    | Lipid fatty-acid and isoprenoid metabolism ""SUBCELLULAR LOCALISA'                         | transferase activity             |
| CA4464 | 1.0 | 1.0 | 1.0 | 0.9 | 0.9 | 1.0 | IPF9828    | complemer similar to Saccharomyces cerevisi orf19.6861     | 9828 IPF9828   | CELL CYCLE AND DNA PROCESSING ""PROTEIN FATE [folding modifi                               | protein binding                  |
| CA4465 | 1.0 | 1.1 | 1.1 | 1.0 | 1.0 | 0.9 | IPF9829    | complemer unknown function orf19.6862                      | 9829 IPF9829   | UNCLASSIFIED PROTEINS                                                                      | molecular_function unknown       |
| CA4466 | 1.0 | 1.0 | 1.0 | 1.0 | 1.0 | 1.1 | VPH1       | complemer H+-ATPase V0 domain subunit (by orf19.6863       | 9830 CaVPH1    | PROTEIN FATE [folding modification destination] ""CELLULAR TRANSP                          | transporter activity             |
| CA4467 | 1.0 | 1.1 | 1.0 | 1.1 | 1.1 | 0.9 | IPF9833    | 13957835..unknown function orf19.6864                      | 9833 IPF9833   | No significant S.c. match                                                                  |                                  |
| CA4468 | 1.0 | 1.0 | 1.0 | 1.0 | 1.0 | 1.0 | TOR2.5EOC  | 13960608..phosphatidylinositol 3-kinase, interorf19.1905   | 9721 CaTOR2.5  | Lipid fatty-acid and isoprenoid metabolism ""CELL CYCLE AND DNA PROCESSING CELLULAR COMMUN |                                  |
| CA4469 | 1.1 | 1.0 | 1.0 | 1.0 | 1.0 | 1.0 | TOR2.3F    | 13962745..phosphatidylinositol 3-kinase, 3-pr orf19.1903   | 9719 CaTOR2.3  | Lipid fatty-acid and isoprenoid metabolism ""CELL CYCLE AND DNA PR                         | protein binding                  |
| CA4470 | 1.0 | 1.0 | 1.1 | 1.0 | 1.0 | 1.0 | IPF9717    | 13967770..unknown function orf19.1902                      | 9717 IPF9717   | UNCLASSIFIED PROTEINS                                                                      | molecular_function unknown       |
| CA4471 | 1.0 | 1.0 | 1.0 | 1.0 | 1.0 | 1.0 | MCM3       | 13969807..replication initiation protein (by hororf19.1901 | 9716 CaMCM3    | CELL CYCLE AND DNA PROCESSING SUBCELLULAR LOCALISATIO                                      | DNA binding                      |
| CA4472 | 1.0 | 1.0 | 1.1 | 1.0 | 1.1 | 1.0 | IPF6444    | 13972714..putative methyltransferase (by hororf19.1900     | 6444 IPF6444   | UNCLASSIFIED PROTEINS                                                                      | transferase activity             |
| CA4473 | 1.0 | 1.1 | 1.0 | 1.0 | 1.1 | 1.0 | IPF6447    | 13974538..unknown function orf19.1897                      | 6447 IPF6447   | UNCLASSIFIED PROTEINS                                                                      |                                  |
| CA4474 | 0.9 | 1.2 | 0.5 | 0.3 | 0.5 | 0.5 | SSC1       | 13976149..Mitochondrial heat shock protein 7 orf19.1896    | 6450 CaSSC1    | PROTEIN FATE [folding modification destination] ""CELLULAR TRANSP                          | enzyme regulator activity        |
| CA4475 | 1.0 | 1.0 | 1.0 | 0.9 | 1.0 | 1.0 | IPF6455    | complemer unknown function orf19.1893                      | 6455 IPF6455   | No significant S.c. match                                                                  |                                  |
| CA4476 | 1.1 | 1.4 | 1.2 | 1.2 | 1.2 | 1.1 | 01-Apr     | complemer aspartyl protease vacuolar as orf19.1891         | 6456 CaAPR1    | PROTEIN FATE [folding modification destination] ""SUBCELLULAR LOC                          | peptidase activity               |
| CA4477 | 1.0 | 0.9 | 0.9 | 1.1 | 1.0 | 1.0 | IPF6459    | 13983877..unknown function orf19.1890                      | 6459 IPF6459   | UNCLASSIFIED PROTEINS                                                                      | molecular_function unknown       |
| CA4478 | 1.0 | 0.8 | 1.0 | 1.0 | 1.0 | 1.0 | IPF6461    | 13985699..unknown function orf19.1889                      | 6461 IPF6461   | C-compound and carbohydrate metabolism ENERGY                                              | molecular_function unknown       |
| CA4479 | 1.0 | 1.0 | 1.0 | 1.0 | 1.0 | 1.0 | URH1       | complemer Uridine ribohydrolase (by homologorf19.1888      | 6462 CaURH1    | Nucleotide metabolism Purine ribonucleotide metabolism                                     | hydrolase activity               |
| CA4480 | 1.1 | 1.0 | 0.9 | 1.1 | 1.0 | 1.0 | IPF6464    | complemer putative triacylglycerol lipase (by horf19.1887  | 6464 IPF6464   | Lipid fatty-acid and isoprenoid metabolism                                                 | molecular_function unknown       |
| CA4481 | 1.0 | 0.9 | 1.0 | 1.1 | 1.1 | 1.0 | IPF9150    | 13992547..similar to Saccharomyces cerevisi orf19.9441     | 9150 IPF9150   | PROTEIN SYNTHESIS                                                                          | transcription regulator activity |
| CA4482 | 0.9 | 1.0 | 0.9 | 1.0 | 1.0 | 1.0 | IPF9154    | 13993921..similar to Saccharomyces cerevisi orf19.1883     | 9154 IPF9154   | SUBCELLULAR LOCALISATION                                                                   | molecular_function unknown       |
| CA4483 | 1.1 | 1.0 | 0.9 | 1.0 | 0.9 | 1.0 | IPF9156    | 13997689..unknown function orf19.1881                      | 9156 IPF9156   | UNCLASSIFIED PROTEINS                                                                      | molecular_function unknown       |
| CA4484 | 1.1 | 1.0 | 0.9 | 1.0 | 1.1 | 1.0 | HEM15      | 14000215..ferrochelatase precursor (by homorf19.1880       | 9158 CaHEM15   | Metabolism of vitamins cofactors and prosthetic groups ""REGULATION                        | lyase activity                   |
| CA4485 | 1.0 | 1.0 | 1.0 | 0.9 | 1.0 | 1.0 | IPF9160    | complemer similar to Saccharomyces cerevisi orf19.1878     | 9160 IPF9160   | TRANSCRIPTION SUBCELLULAR LOCALISATION                                                     | transcription regulator activity |
| CA4486 | 0.9 | 1.0 | 1.1 | 1.1 | 1.0 | 1.0 | IPF9162    | 14002693..unknown function orf19.1877                      | 9162 IPF9162   | UNCLASSIFIED PROTEINS                                                                      | molecular_function unknown       |
| CA4487 | 1.0 | 1.0 | 1.0 | 1.0 | 1.0 | 1.0 | IPF4039    | complemer similar to Saccharomyces cerevisi orf19.1876     | 4039 IPF4039   | CELL CYCLE AND DNA PROCESSING TRANSCRIPTION                                                | RNA binding                      |
| CA4488 | 1.1 | 1.0 | 0.9 | 1.0 | 0.9 | 1.0 | MEK1.3F    | complemer serine/threonine protein kinase, 3- orf19.1875   | 4041 CaMEK1.3  | CELL CYCLE AND DNA PROCESSING SUBCELLULAR LOCALISATIO                                      | protein kinase activity          |
| CA4490 | 1.3 | 1.3 | 0.9 | 0.9 | 0.9 | 1.0 | IPF4045    | complemer unknown function orf19.9428                      | 4045 IPF4045   | No significant S.c. match                                                                  |                                  |
| CA4491 | 1.0 | 1.0 | 1.0 | 1.0 | 1.0 | 1.0 | SWR1       | 14009069..putative DNA helicase (by homologorf19.9427      | 4050 CaSWR1    | TRANSCRIPTION                                                                              | helicase activity                |
| CA4492 | 1.0 | 1.0 | 1.0 | 1.1 | 1.2 | 1.0 | RNR22      | 14015299..ribonucleoside-diphosphate reductorf19.1868      | 4053 CaRNR22   | Nucleotide metabolism CELL CYCLE AND DNA PROCESSING SUBCELLULAR LOCALISATION               |                                  |
| CA4493 | 1.0 | 1.0 | 1.0 | 1.1 | 1.0 | 1.0 | IPF4055    | 14016968..unknown function orf19.1867                      | 4055 IPF4055   | CELL RESCUE DEFENSE AND VIRULENCE ""SUBCELLULAR LOCALISATION                               |                                  |
| CA4494 | 0.9 | 1.0 | 1.0 | 1.0 | 1.1 | 1.0 | VMA1       | 14018455..vacuolar ATPase V1 domain subu orf19.1866        | 4056 CaVMA1    | No significant S.c. match                                                                  | transporter activity             |
| CA4495 | 0.9 | 1.0 | 1.1 | 1.0 | 1.1 | 1.0 | IPF4059    | complemer aldehyde dehydrogenase (by homorf19.1865         | 4059 IPF4059   | ENERGY CELLULAR TRANSPORT AND TRANSPORT MECHANISMS                                         | molecular_function unknown       |
| CA4496 | 1.0 | 1.0 | 1.1 | 1.0 | 1.0 | 1.0 | IPF4062    | complemer unknown function orf19.9420                      | 4062 IPF4062   | UNCLASSIFIED PROTEINS                                                                      | molecular_function unknown       |
| CA4497 | 0.9 | 0.9 | 0.9 | 1.1 | 0.9 | 1.0 | IPF4064    | 14023894..unknown function orf19.9419                      | 4064 IPF4064   | No significant S.c. match                                                                  |                                  |
| CA4498 | 0.9 | 1.0 | 1.0 | 1.0 | 1.1 | 1.0 | IPF11315   | 14026958..unknown function orf19.8143                      | 11315 IPF11315 | CELLULAR COMMUNICATION/SIGNAL TRANSDUCTION MECHANISMA                                      | molecular_function unknown       |
| CA4499 | 1.0 | 0.9 | 1.0 | 1.0 | 1.0 | 1.1 | IPF11316   | complemer unknown function orf19.511                       | 11316 IPF11316 | UNCLASSIFIED PROTEINS                                                                      | molecular_function unknown       |
| CA4500 | 0.9 | 0.9 | 1.1 | 1.1 | 1.0 | 1.1 | IPF11319   | 14033050..unknown function orf19.8141                      | 11319 IPF11319 | UNCLASSIFIED PROTEINS                                                                      |                                  |
| CA4501 | 1.0 | 1.0 | 1.0 | 1.0 | 1.0 | 1.1 | QDR1       | 14035767..putative antibiotic resistance prote orf19.8138  | 16422 CaQDR1   | CELL RESCUE DEFENSE AND VIRULENCE ""TRANSPORT FACILITA                                     | transporter activity             |
| CA4502 | 1.0 | 1.0 | 0.8 | 0.8 | 0.8 | 0.9 | IPF10391   | complemer Similar to dnaJ proteins orf19.8136              | 10391 IPF10391 | CELL CYCLE AND DNA PROCESSING ""PROTEIN FATE [folding modifi                               | enzyme regulator activity        |
| CA4503 | 0.9 | 0.9 | 0.9 | 0.9 | 1.0 | 1.1 | SRV2       | complemer adenylate cyclase-associated protorf19.505       | 10389 CaSRV2   | CELLULAR COMMUNICATION/SIGNAL TRANSDUCTION MECHANISA                                       | protein binding                  |
| CA4504 | 1.0 | 1.0 | 1.1 | 1.0 | 1.0 | 1.1 | ARP5       | 14041534..actin-related protein (by homology orf19.504     | 10388 CaARP5   | SUBCELLULAR LOCALISATION                                                                   | molecular_function unknown       |
| CA4505 | 1.1 | 1.1 | 0.9 | 1.0 | 1.0 | 1.0 | NOP2       | complemer nuclear protein (by homology) orf19.501          | 15042 CaNOP2   | TRANSCRIPTION SUBCELLULAR LOCALISATION                                                     | transferase activity             |
| CA4506 | 0.9 | 1.0 | 1.0 | 1.0 | 0.9 | 0.9 | GCD10      | 14046116..translation initiation factor eIF3 Rnorf19.500   | 15038 CaGCD10  | PROTEIN SYNTHESIS SUBCELLULAR LOCALISATION                                                 | transferase activity             |
| CA4507 | 1.0 | 1.0 | 1.0 | 0.9 | 1.1 | 1.0 | IPF20015   | complemer unknown function orf19.499                       | 20015 IPF20015 | UNCLASSIFIED PROTEINS                                                                      | transferase activity             |
| CA4508 | 0.9 | 0.9 | 1.0 | 1.0 | 1.0 | 0.9 | NAM9       | complemer mitochondrial ribosomal protein orf19.498        | 8974 CaNAM9    | PROTEIN SYNTHESIS SUBCELLULAR LOCALISATION                                                 | structural molecule activity     |
| CA4509 | 1.1 | 1.0 | 1.1 | 1.0 | 1.1 | 1.0 | IPF8973    | 14050477..unknown function orf19.497                       | 8973 IPF8973   | UNCLASSIFIED PROTEINS                                                                      | molecular_function unknown       |
| CA4510 | 1.0 | 1.0 | 0.9 | 0.9 | 1.0 | 1.0 | IPF8970    | 14052090..similar to Saccharomyces cerevisi orf19.496      | 8970 IPF8970   | CELL CYCLE AND DNA PROCESSING SUBCELLULAR LOCALISATION                                     |                                  |
| CA4511 | 1.0 | 1.1 | 1.0 | 1.2 | 1.0 | 1.0 | IPF8966    | complemer unknown function orf19.8124                      | 8966 IPF8966   | UNCLASSIFIED PROTEINS                                                                      | transporter activity,RNA binding |
| CA4512 | 0.9 | 1.0 | 1.0 | 1.2 | 1.0 | 1.1 | RPL15B     | 14057436..ribosomal protein L15.e.c13 (by hcorf19.8123     | 8963 CaRPL15B  | PROTEIN SYNTHESIS SUBCELLULAR LOCALISATION                                                 | RNA binding                      |
| CA4513 | 1.0 | 0.9 | 1.0 | 1.1 | 1.2 | 1.1 | ADE17      | 14058839..5-aminoimidazole-4-carboxamide orf19.492         | 14907 CaADE17  | Nucleotide metabolism Purine ribonucleotide metabolism                                     | hydrolase activity               |
| CA4514 | 1.0 | 1.0 | 0.9 | 0.9 | 1.0 | 1.1 | IPF20016   | 14061041..similar to Saccharomyces cerevisi orf19.491      | 20016 IPF20016 | PROTEIN FATE [folding modification destination] ""CELLULAR TRANSP                          | transporter activity             |
| CA4515 | 1.0 | 1.0 | 1.1 | 1.0 | 0.9 | 1.0 | IPF16652   | complemer unknown function orf19.490                       | 16652 IPF16652 | UNCLASSIFIED PROTEINS                                                                      | transferase activity             |
| CA4516 | 1.0 | 0.9 | 1.0 | 1.0 | 1.0 | 1.0 | IPF18207   | 14064587..unknown function orf19.489                       | 18207 IPF18207 | UNCLASSIFIED PROTEINS                                                                      | molecular_function unknown       |
| CA4517 | 1.0 | 1.0 | 1.0 | 1.1 | 1.0 | 1.0 | MEX67      | 14065491..poly(A)+RNA binding protein invol orf19.488      | 7086 CaMEX67   | TRANSCRIPTION SUBCELLULAR LOCALISATION                                                     | protein binding,RNA binding      |
| CA4518 | 1.0 | 0.9 | 1.0 | 1.0 | 1.0 | 1.0 | SPT14      | 14067741..N-acetylglucosaminyl-phosphatidy orf19.487       | 7087 CaSPT14   | C-compound and carbohydrate metabolism ""Lipid fatty-acid and isopen                       | transferase activity             |
| CA4519 | 0.9 | 0.9 | 1.0 | 1.0 | 1.0 | 1.0 | IPF7088    | complemer similar to Saccharomyces cerevisi orf19.486      | 7088 IPF7088   | CELL CYCLE AND DNA PROCESSING CELLULAR TRANSPORT AND                                       | protein binding                  |
| CA4520 | 1.0 | 1.0 | 0.9 | 1.0 | 1.0 | 1.0 | CDC31      | 14071993..spindle pole body component, cen orf19.485       | 7089 CaCDC31   | CELL CYCLE AND DNA PROCESSING CONTROL OF CELLULAR ORC                                      | structural molecule activity     |

|        |     |     |     |     |     |     |            |                                                           |                  |                                                                                            |                                     |
|--------|-----|-----|-----|-----|-----|-----|------------|-----------------------------------------------------------|------------------|--------------------------------------------------------------------------------------------|-------------------------------------|
| CA4521 | 1.0 | 1.0 | 1.1 | 1.1 | 1.0 | 1.1 | MRPL40     | 14073012..Putative mitochondrial ribosomal porf19.484     | 7091 CaMRPL40    | PROTEIN SYNTHESIS SUBCELLULAR LOCALISATION                                                 | structural molecule activity        |
| CA4522 | 1.0 | 1.0 | 0.9 | 1.0 | 1.0 | 1.0 | RPT4       | complemer 26S proteasome regulatory subun orf19.482       | 7093 CaRPT4      | TRANSCRIPTION ""PROTEIN FATE [folding modification destination] ""                         | peptidase activity                  |
| CA4523 | 1.0 | 1.1 | 1.0 | 1.0 | 1.0 | 1.1 | GCD1       | 14075715..translation initiation factor eIF2bgaorf19.481  | 7094 CaGCD1      | SUBCELLULAR LOCALISATION                                                                   | translation regulator activity      |
| CA4524 | 0.9 | 1.0 | 0.9 | 1.0 | 1.0 | 1.0 | IPF7097    | complemer unknown function orf19.480                      | 7097 IPF7097     | UNCLASSIFIED PROTEINS                                                                      | molecular_function unknown          |
| CA4525 | 0.9 | 1.0 | 0.9 | 0.9 | 1.0 | 1.0 | SEC22      | 14078810..synaptobrevin-type protein transport protein (t | 7098 CaSEC22     | CELLULAR TRANSPORT AND TRANSPORT MECHANISMS SUBCELL                                        | transporter activity                |
| CA4526 | 1.1 | 1.0 | 1.1 | 1.1 | 1.0 | 1.0 | MON1.3     | 14079483..unknown function, 3-prime end orf19.8109        | 7100 CaMON1.3    | UNCLASSIFIED PROTEINS                                                                      | molecular_function unknown          |
| CA4527 | 1.1 | 1.0 | 1.0 | 1.0 | 1.1 | 1.0 | IPF4398    | 14082622..unknown function orf19.9054                     | 4398 IPF4398     | UNCLASSIFIED PROTEINS                                                                      |                                     |
| CA4528 | 0.9 | 1.0 | 1.0 | 1.0 | 1.0 | 1.1 | STT3       | 14085326..oligosaccharyl transferase (by hon orf19.1478   | 4396 CaSTT3      | C-compound and carbohydrate metabolism ""PROTEIN FATE [folding m                           | transferase activity                |
| CA4529 | 1.2 | 1.2 | 1.1 | 1.1 | 1.1 | 1.0 | IPF4395    | 14088050..unknown function orf19.1477                     | 4395 IPF4395     | UNCLASSIFIED PROTEINS                                                                      | molecular_function unknown          |
| CA4530 | 1.0 | 1.0 | 1.0 | 1.0 | 1.1 | 1.0 | IME4       | complemer positive transcription factor for IMEorf19.1476 | 4394 CalME4      | TRANSCRIPTION CELL FATE SUBCELLULAR LOCALISATION                                           | transferase activity                |
| CA4531 | 1.1 | 1.1 | 1.0 | 1.0 | 1.1 | 1.0 | SLA1       | complemer cytoskeleton assembly control proorf19.1474     | 4392 CaSLA1      | PROTEIN FATE [folding modification destination] ""CELL FATE SUBCEL                         | protein binding                     |
| CA4532 | 1.1 | 1.1 | 1.0 | 1.0 | 1.1 | 1.1 | IPF4386    | complemer unknown function orf19.1473                     | 4386 IPF4386     | CLASSIFICATION NOT YET CLEAR-CUT                                                           |                                     |
| CA4533 | 1.0 | 1.2 | 1.1 | 1.0 | 0.9 | 0.9 | COX4       | complemer cytochrome-c oxidase (by homologorf19.1471      | 20017 CaCOX4     | ENERGY SUBCELLULAR LOCALISATION                                                            | oxidoreductase activity             |
| CA4534 | 1.1 | 1.1 | 0.7 | 0.7 | 0.8 | 1.1 | RPS26A     | 14098607..ribosomal protein S26.e.A, cytosol orf19.1470   | 4380 CaRPS26A    | PROTEIN SYNTHESIS SUBCELLULAR LOCALISATION                                                 | structural molecule activity        |
| CA4535 | 1.1 | 1.0 | 1.1 | 1.0 | 1.0 | 1.0 | CDC55      | 14100236..B subunit of protein phosphatase 2orf19.1468    | 4377 CaCDC55     | CELL CYCLE AND DNA PROCESSING ""CELL RESCUE DEFENSE AN                                     | protein phosphatase activity        |
| CA4536 | 1.0 | 1.2 | 0.7 | 0.5 | 0.8 | 0.7 | COX13      | complemer cytochrome-c oxidase chain VIa (t orf19.1467    | 4376 CaCOX13     | ENERGY SUBCELLULAR LOCALISATION                                                            | enzyme regulator activity           |
| CA4537 | 0.9 | 1.0 | 1.0 | 1.0 | 1.1 | 1.0 | YNT2       | complemer suppressor of rna12/yme2 (by hon orf19.1466     | 4375 CaYNT2      | TRANSCRIPTION                                                                              | hydrolase activity                  |
| CA4538 | 0.9 | 1.1 | 1.0 | 1.0 | 0.9 | 1.0 | IPF20018   | complemer unknown function orf19.1465                     | 20018 IPF20018   | UNCLASSIFIED PROTEINS                                                                      |                                     |
| CA4539 | 1.1 | 1.0 | 1.0 | 1.0 | 0.9 | 1.0 | IFQ4       | complemer Unknown function orf19.1464                     | 6260 CalFQ4      | UNCLASSIFIED PROTEINS                                                                      |                                     |
| CA4540 | 0.9 | 0.9 | 1.0 | 0.8 | 1.0 | 1.1 | SMP2       | complemer involved in plasmid maintenance, orf19.1462     | 6259 CaSMP2      | ENERGY CELL FATE CONTROL OF CELLULAR ORGANIZATION                                          | molecular_function unknown          |
| CA4541 | 1.0 | 1.0 | 1.0 | 1.1 | 1.0 | 0.9 | IPF6257    | complemer unknown function orf19.1461                     | 6257 IPF6257     | No significant S.c. match                                                                  |                                     |
| CA4542 | 1.0 | 1.1 | 1.1 | 1.1 | 1.0 | 1.1 | IPF6255    | 14111834..unknown function orf19.1460                     | 6255 IPF6255     | UNCLASSIFIED PROTEINS                                                                      | hydrolase activity                  |
| CA4543 | 0.9 | 1.0 | 1.0 | 0.9 | 0.9 | 1.0 | PPE1       | complemer Ribosomal protein of the small suborf19.1459    | 6254 CaPPE1      | PROTEIN SYNTHESIS SUBCELLULAR LOCALISATION                                                 | hydrolase activity                  |
| CA4544 | 0.9 | 1.0 | 1.0 | 0.9 | 1.0 | 1.0 | IPF6252    | 14115326..similar to Saccharomyces cerevisi orf19.1458    | 6252 IPF6252     | TRANSCRIPTION                                                                              | hydrolase activity                  |
| CA4545 | 1.1 | 1.0 | 1.0 | 1.0 | 1.0 | 0.9 | SSL1       | 14116432..TFIIH subunit (transcription initiatcorf19.1457 | 6250 CaSSL1      | CELL CYCLE AND DNA PROCESSING TRANSCRIPTION PROTEIN S'                                     | transcription regulator activity    |
| CA4546 | 1.1 | 1.2 | 1.1 | 1.0 | 1.1 | 1.0 | SPT5       | complemer Transcription elongation protein orf19.1453     | 6247 CaSPT5      | CELL CYCLE AND DNA PROCESSING TRANSCRIPTION SUBCELLUL                                      | transcription regulator activity    |
| CA4547 | 0.9 | 0.9 | 1.0 | 1.0 | 1.1 | 1.0 | SRB9       | complemer DNA-directed RNA polymerase II I orf19.1451     | 6242 CaSRB9      | C-compound and carbohydrate metabolism TRANSCRIPTION SUBCELL                               | transcription regulator activity    |
| CA4548 | 1.1 | 1.0 | 1.0 | 1.0 | 1.1 | 1.1 | IPF7862    | 14126680..unknown function orf19.1450                     | 7862 IPF7862     | PROTEIN FATE [folding modification destination]                                            |                                     |
| CA4549 | 1.0 | 1.0 | 0.9 | 1.0 | 1.1 | 1.0 | IPF7863    | 14128068..unknown function orf19.1449                     | 7863 IPF7863     | Nitrogen and sulphur metabolism                                                            | molecular_function unknown          |
| CA4550 | 1.0 | 1.0 | 1.0 | 1.0 | 1.0 | 1.0 | DYN2.3     | 14129143..Dynein light chain 1, cytosolic, 3-prime end    | 7865 CaDYN2.3    | CELLULAR TRANSPORT AND TRANSPORT MECHANISMS SUBCELL                                        | motor activity                      |
| CA4551 | 1.0 | 1.0 | 1.0 | 1.0 | 1.0 | 1.0 | APT1       | complemer adenine phosphoribosyltransferasorf19.1448      | 7867 CaAPT1      | Nucleotide metabolism: Purine ribonucleotide metabolism                                    | transferase activity                |
| CA4552 | 1.0 | 1.0 | 1.1 | 1.0 | 0.9 | 0.9 | IPF7869    | 14130639..unknown function orf19.1447                     | 7869 IPF7869     | CONTROL OF CELLULAR ORGANIZATION                                                           |                                     |
| CA4553 | 1.0 | 0.8 | 0.9 | 1.0 | 1.0 | 1.0 | CYB1       | 14136327..G2/Mitotic-specific cyc Cyb1 Lengorf19.1446     | 7873 CaCYB1      | CELL CYCLE AND DNA PROCESSING CELL FATE                                                    | protein kinase activity,enzyme regi |
| CA4554 | 1.0 | 1.1 | 1.1 | 0.9 | 1.0 | 1.0 | IPF7874    | 14138304..similar to Saccharomyces cerevisi orf19.1445    | 7874 IPF7874     | TRANSCRIPTION                                                                              | molecular_function unknown          |
| CA4555 | 1.0 | 0.9 | 1.1 | 0.9 | 0.9 | 1.1 | IPF17555.3 | complemer unknown function, 3-prime end orf19.9019        | 17555 IPF17555.3 | CELLULAR TRANSPORT AND TRANSPORT MECHANISMS SUBCELL                                        | protein binding                     |
| CA4556 | 1.0 | 1.0 | 1.0 | 1.0 | 1.0 | 1.0 | IPF8044    | complemer similar to Saccharomyces cerevisi orf19.6866    | 8044 IPF8044     | TRANSCRIPTION SUBCELLULAR LOCALISATION                                                     | RNA binding                         |
| CA4557 | 1.0 | 1.0 | 1.0 | 1.0 | 0.9 | 1.0 | IPF8043    | 14144722..unknown function orf19.6867                     | 8043 IPF8043     | UNCLASSIFIED PROTEINS                                                                      |                                     |
| CA4558 | 1.0 | 1.1 | 1.0 | 1.0 | 1.0 | 1.0 | GRP5       | 14145467..dihydroflavonol-4-reductases (by h orf19.6868   | 8042 CaGRP5      | Metabolism of vitamins cofactors and prosthetic groups                                     |                                     |
| CA4559 | 1.1 | 1.0 | 1.0 | 1.0 | 1.0 | 1.0 | IPF8041    | complemer putative mitochondrial inner memb orf19.6869    | 8041 IPF8041     | PROTEIN FATE [folding modification destination] ""SUBCELLULAR LOCALISATION                 |                                     |
| CA4560 | 1.0 | 0.9 | 1.0 | 1.1 | 1.1 | 1.2 | IPF8038    | 14150732..unknown function orf19.6871                     | 8038 IPF8038     | UNCLASSIFIED PROTEINS                                                                      | molecular_function unknown          |
| CA4561 | 1.0 | 1.0 | 1.1 | 1.1 | 1.0 | 0.9 | IPF8031    | complemer unknown function orf19.6872                     | 8031 IPF8031     | SUBCELLULAR LOCALISATION                                                                   | molecular_function unknown          |
| CA4562 | 1.2 | 1.1 | 0.9 | 0.8 | 0.9 | 1.0 | RPS8A      | complemer ribosomal protein (by homology) orf19.6873      | 6565 CaRPS8A     | PROTEIN SYNTHESIS SUBCELLULAR LOCALISATION                                                 | structural molecule activity        |
| CA4563 | 1.0 | 0.9 | 1.0 | 1.0 | 1.0 | 1.0 | IPF6566    | 14158941..unknown function orf19.6874                     | 6566 IPF6566     | UNCLASSIFIED PROTEINS                                                                      | molecular_function unknown          |
| CA4564 | 1.0 | 1.1 | 1.1 | 1.0 | 1.0 | 0.9 | IPF6572    | 14165740..unknown function orf19.6874                     | 6572 IPF6572     | CELL CYCLE AND DNA PROCESSING                                                              |                                     |
| CA4565 | 1.1 | 1.1 | 1.0 | 1.0 | 1.0 | 1.1 | VPS35      | 14168313..Protein-sorting protein, vacuolar (t orf19.6875 | 6573 CaVPS35     | PROTEIN FATE [folding modification destination] ""CELLULAR TRANSP                          | molecular_function unknown          |
| CA4566 | 1.0 | 1.1 | 1.1 | 1.2 | 1.1 | 1.1 | IPF19801   | 14172755..unknown function orf19.6877                     | 19801 IPF19801   | No significant S.c. match                                                                  |                                     |
| CA4567 | 1.0 | 0.9 | 1.0 | 0.9 | 0.9 | 0.9 | IPF9555    | complemer unknown function orf19.6879                     | 9555 IPF9555     | TRANSCRIPTION SUBCELLULAR LOCALISATION                                                     | RNA binding                         |
| CA4568 | 1.0 | 1.0 | 1.0 | 0.9 | 1.0 | 1.0 | IPF9554    | 14177046..unknown function orf19.6880                     | 9554 IPF9554     | UNCLASSIFIED PROTEINS                                                                      | molecular_function unknown          |
| CA4569 | 1.0 | 1.0 | 0.9 | 0.9 | 0.9 | 0.9 | IPF9552    | complemer unknown function orf19.6881                     | 9552 IPF9552     | TRANSCRIPTION                                                                              | RNA binding                         |
| CA4570 | 0.9 | 0.4 | 1.3 | 1.7 | 1.2 | 0.7 | IPF9550    | 14181143..similar to Saccharomyces cerevisi orf19.6882    | 9550 IPF9550     | ENERGY ""CELL RESCUE DEFENSE AND VIRULENCE ""SUBCELLUL                                     | oxidoreductase activity             |
| CA4571 | 1.1 | 1.0 | 0.9 | 1.0 | 1.0 | 1.1 | RPL33.3    | complemer ribosomal protein L35a, 3-prime end             | 9548 CaRPL33.3   | PROTEIN SYNTHESIS SUBCELLULAR LOCALISATION                                                 | structural molecule activity        |
| CA4572 | 1.0 | 1.0 | 1.0 | 1.0 | 1.0 | 1.1 | KES1       | complemer involved in ergosterol biosynthesis orf19.6883  | 9434 CaKES1      | Lipid fatty-acid and isoprenoid metabolism ""CELLULAR TRANSPORT AND TRANSPORT MECHANISMS : |                                     |
| CA4573 | 1.2 | 1.1 | 1.0 | 1.0 | 0.9 | 1.0 | IPF9431    | complemer unknown function orf19.6884                     | 9431 IPF9431     | UNCLASSIFIED PROTEINS                                                                      | molecular_function unknown          |
| CA4574 | 1.0 | 0.9 | 1.0 | 1.1 | 1.0 | 1.0 | IPF9430    | 14188237..similar to Saccharomyces cerevisi orf19.6885    | 9430 IPF9430     | CELL CYCLE AND DNA PROCESSING CELL FATE CONTROL OF CEL                                     | molecular_function unknown          |
| CA4575 | 1.0 | 1.0 | 1.0 | 1.0 | 1.0 | 1.1 | IPF9428    | 14190289..unknown function orf19.6886                     | 9428 IPF9428     | UNCLASSIFIED PROTEINS                                                                      | molecular_function unknown          |
| CA4576 | 0.9 | 0.9 | 0.9 | 0.9 | 1.1 | 0.9 | IPF9425.3  | 14194146..unknown function, 3-prime end orf19.6888        | 9425 IPF9425.3   | No significant S.c. match                                                                  |                                     |
| CA4577 | 1.0 | 1.0 | 1.1 | 1.0 | 1.0 | 1.1 | MKK2       | complemer Protein kinase of MEK (by homologorf19.6889     | 14309 CaMKK2     | CELL CYCLE AND DNA PROCESSING ""CELL RESCUE DEFENSE AN                                     | protein kinase activity             |
| CA4578 | 1.0 | 1.1 | 0.9 | 0.9 | 1.0 | 1.0 | RFC1       | complemer DNA replication factor C (by homo orf19.6891    | 14308 CaRFC1     | CELL CYCLE AND DNA PROCESSING SUBCELLULAR LOCALISATION                                     |                                     |
| CA4579 | 1.0 | 1.0 | 1.1 | 0.9 | 0.9 | 1.0 | IPF2234    | 14220274..unknown function orf19.6898                     | 2234 IPF2234     | No significant S.c. match                                                                  |                                     |
| CA4580 | 1.0 | 1.0 | 1.0 | 0.9 | 0.9 | 0.9 | IPF2233    | complemer unknown function orf19.6899                     | 2233 IPF2233     | No significant S.c. match                                                                  |                                     |
| CA4581 | 1.1 | 1.0 | 0.9 | 1.0 | 1.0 | 1.0 | IPF2232    | complemer unknown function orf19.6899                     | 2232 IPF2232     | UNCLASSIFIED PROTEINS                                                                      |                                     |
| CA4582 | 1.0 | 0.9 | 1.0 | 1.1 | 1.0 | 0.9 | MDM12      | 14224083..Involved in mitochondrial inheritan orf19.6900  | 2231 CaMDM12     | SUBCELLULAR LOCALISATION                                                                   | molecular_function unknown          |
| CA4583 | 0.9 | 1.0 | 1.0 | 1.1 | 1.0 | 1.1 | IPF2229    | 14225693..unknown function orf19.6901                     | 2229 IPF2229     | UNCLASSIFIED PROTEINS                                                                      | molecular_function unknown          |
| CA4584 | 1.0 | 1.0 | 1.0 | 0.9 | 1.0 | 1.0 | IPF2228    | complemer similar to Saccharomyces cerevisi orf19.6902    | 2228 IPF2228     | TRANSCRIPTION                                                                              | RNA binding,helicase activity       |
| CA4585 | 0.9 | 1.0 | 1.0 | 1.1 | 1.0 | 1.0 | IPF2227    | complemer unknown function orf19.6903                     | 2227 IPF2227     | TRANSCRIPTION                                                                              | nucleotidyltransferase activity     |
| CA4586 | 1.0 | 1.0 | 1.0 | 0.9 | 1.0 | 1.0 | GCN3       | 14230237.. Translation initiation factor eIF2B orf19.6904 | 2224 CaGCN3      | PROTEIN SYNTHESIS SUBCELLULAR LOCALISATION                                                 | translation regulator activity      |
| CA4587 | 0.9 | 0.8 | 0.8 | 0.9 | 1.0 | 0.7 | IPF2223    | complemer unknown function orf19.6905                     | 2223 IPF2223     | UNCLASSIFIED PROTEINS                                                                      | molecular_function unknown          |
| CA4588 | 1.0 | 1.0 | 0.9 | 1.0 | 0.8 | 1.0 | BEL1.EXON1 | 14233745..protein of the 40S ribosomal subunorf19.6906    | 2221 CaBEL1.ex   | ENERGY PROTEIN SYNTHESIS SUBCELLULAR LOCALISATION                                          | molecular_function unknown          |
| CA4589 | 1.0 | 1.1 | 0.9 | 0.9 | 1.0 | 0.9 | BEL1.EXON2 | 14234532..protein of the 40S ribosomal subunit, exon 2 (  | 2220 CaBEL1.ex   | ENERGY PROTEIN SYNTHESIS SUBCELLULAR LOCALISATION                                          |                                     |
| CA4590 | 1.0 | 1.0 | 1.0 | 1.0 | 1.1 | 1.0 | IPF2218    | complemer unknown function orf19.6907                     | 2218 IPF2218     | UNCLASSIFIED PROTEINS                                                                      | molecular_function unknown          |
| CA4591 | 1.0 | 1.0 | 1.0 | 1.0 | 1.0 | 1.0 | IPF2216    | complemer putative folylpolyglutamate synthetorf19.6908   | 2216 IPF2216     | Metabolism of vitamins cofactors and prosthetic groups                                     | ligase activity                     |
| CA4592 | 1.1 | 1.0 | 0.9 | 0.9 | 0.8 | 1.0 | IPF2215    | 14239185..unknown function orf19.6909                     | 2215 IPF2215     | TRANSCRIPTION SUBCELLULAR LOCALISATION                                                     | transcription regulator activity    |

|        |     |     |     |     |     |     |          |                                               |             |       |          |                                                                                               |                                    |
|--------|-----|-----|-----|-----|-----|-----|----------|-----------------------------------------------|-------------|-------|----------|-----------------------------------------------------------------------------------------------|------------------------------------|
| CA4593 | 0.9 | 1.0 | 1.0 | 1.0 | 1.0 | 1.0 | IPF2214  | complemer unknown function                    | orf19.6910  | 2214  | IPF2214  | UNCLASSIFIED PROTEINS                                                                         | DNA binding                        |
| CA4594 | 1.0 | 1.1 | 1.0 | 0.9 | 1.0 | 1.0 | IPF2212  | 14241952..unknown function                    | orf19.6912  | 2212  | IPF2212  | Lipid fatty-acid and isoprenoid metabolism ""SUBCELLULAR LOCALISATION                         |                                    |
| CA4595 | 0.9 | 1.0 | 0.9 | 1.0 | 1.0 | 1.1 | GCN2     | complemer Ser/thr protein kinase (by homolog  | orf19.6913  | 2209  | CaGCN2   | PROTEIN SYNTHESIS SUBCELLULAR LOCALISATION                                                    | protein kinase activity            |
| CA4596 | 1.1 | 1.1 | 1.0 | 1.0 | 1.0 | 1.0 | MRE11    | 14249502..DNA repair and meiotic recombina    | orf19.6915  | 2205  | CaMRE11  | CELL CYCLE AND DNA PROCESSING CONTROL OF CELLULAR ORC                                         | (protein binding                   |
| CA4597 | 1.1 | 1.0 | 1.0 | 0.9 | 1.0 | 1.0 | ATP11    | complemer F1FO-ATPase complex assembly        | orf19.6916  | 2203  | CaATP11  | PROTEIN FATE [folding modification destination] ""SUBCELLULAR LOC                             | chaperone activity                 |
| CA4598 | 1.0 | 1.0 | 1.0 | 1.0 | 1.0 | 0.9 | IPF20019 | complemer unknown function                    | orf19.6917  | 20019 | IPF20019 | UNCLASSIFIED PROTEINS                                                                         | molecular_function unknown         |
| CA4599 | 1.0 | 1.1 | 1.0 | 1.0 | 1.1 | 1.0 | IPF2200  | 14253886..Unknown function                    | orf19.6918  | 2200  | IPF2200  | No significant S.c. match                                                                     |                                    |
| CA4600 | 1.0 | 1.0 | 1.0 | 1.0 | 1.0 | 0.9 | IPF2199  | 14257208..unknown function                    | orf19.6919  | 2199  | IPF2199  | No significant S.c. match                                                                     |                                    |
| CA4601 | 1.0 | 1.0 | 1.0 | 1.1 | 1.0 | 1.0 | IPF2195  | 14261733..unknown function                    | orf19.6920  | 2195  | IPF2195  | No significant S.c. match                                                                     |                                    |
| CA4602 | 1.0 | 1.0 | 1.0 | 1.0 | 1.0 | 1.0 | IPF6231  | 14266071..unknown function                    | orf19.1080; | 6231  | IPF6231  | TRANSCRIPTION                                                                                 | oxidoreductase activity            |
| CA4603 | 1.0 | 1.1 | 1.0 | 1.0 | 1.0 | 0.9 | IPF6230  | complemer unknown function                    | orf19.1080; | 6230  | IPF6230  | Lipid fatty-acid and isoprenoid metabolism                                                    | oxidoreductase activity            |
| CA4604 | 1.1 | 1.0 | 1.0 | 1.0 | 0.9 | 0.8 | MBF1     | 14267840..Multiprotein bridging factor mediat | orf19.3294  | 6228  | CaMBF1   | TRANSCRIPTION                                                                                 | transcription regulator activity   |
| CA4605 | 1.0 | 1.0 | 1.0 | 1.0 | 1.0 | 1.0 | IPF6226  | complemer unknown function                    | orf19.3295  | 6226  | IPF6226  | UNCLASSIFIED PROTEINS                                                                         |                                    |
| CA4606 | 1.0 | 1.0 | 1.0 | 1.0 | 1.0 | 0.9 | IPF6224  | 14270429..unknown function                    | orf19.3296  | 6224  | IPF6224  | No significant S.c. match                                                                     |                                    |
| CA4607 | 1.0 | 1.0 | 1.0 | 1.0 | 1.0 | 1.0 | IPF6223  | complemer unknown function                    | orf19.3297  | 6223  | IPF6223  | UNCLASSIFIED PROTEINS                                                                         | structural molecule activity       |
| CA4608 | 1.0 | 1.0 | 1.0 | 1.0 | 0.9 | 1.1 | CCH1     | 14273192..Calcium channel protein (by homo    | orf19.3298  | 6222  | CaCCH1   | REGULATION OF/INTERACTION WITH CELLULAR ENVIRONMENT C                                         | transporter activity               |
| CA4609 | 1.1 | 1.0 | 1.0 | 0.9 | 0.9 | 1.0 | ZPR1     | complemer Zinc finger protein (by homology)   | orf19.3300  | 6215  | CaZPR1   | UNCLASSIFIED PROTEINS                                                                         | protein binding                    |
| CA4610 | 0.9 | 0.7 | 1.0 | 0.9 | 1.1 | 0.9 | IPF19802 | 14284224..similar to Saccharomyces cerevisi   | orf19.3301  | 19802 | IPF19802 | Amino acid metabolism CELL CYCLE AND DNA PROCESSING TRANS                                     | protein binding                    |
| CA4611 | 0.9 | 1.0 | 1.0 | 1.2 | 1.0 | 1.0 | IPF10727 | complemer unknown function                    | orf19.3302  | 10727 | IPF10727 | C-compound and carbohydrate metabolism ENERGY SUBCELLULAR LOCALISATION                        |                                    |
| CA4612 | 1.0 | 1.0 | 1.0 | 0.9 | 1.0 | 0.9 | PPM2     | complemer carboxy methyl transferase          | orf19.3303  | 10724 | CaPPM2   | PROTEIN FATE [folding modification destination]                                               | transferase activity               |
| CA4613 | 1.1 | 1.1 | 1.1 | 1.1 | 1.0 | 1.0 | IPF7950  | complemer similar to Saccharomyces cerevisi   | orf19.3304  | 7950  | IPF7950  | CELL CYCLE AND DNA PROCESSING                                                                 | RNA binding                        |
| CA4614 | 1.2 | 1.1 | 0.9 | 1.0 | 1.1 | 1.1 | IPF7952  | complemer unknown function                    | orf19.3305  | 7952  | IPF7952  | Lipid fatty-acid and isoprenoid metabolism ""TRANSCRIPTION                                    |                                    |
| CA4615 | 1.0 | 1.0 | 1.0 | 1.0 | 0.9 | 0.9 | IPF7955  | complemer DNA binding protein (by homology    | orf19.3306  | 7955  | IPF7955  | CELL CYCLE AND DNA PROCESSING CONTROL OF CELLULAR ORC                                         | DNA binding                        |
| CA4616 | 1.0 | 0.9 | 1.0 | 1.0 | 1.0 | 1.0 | IPF5761  | complemer flavin-containing monooxygenase (   | orf19.3307  | 5761  | IPF5761  | Nitrogen and sulphur metabolism                                                               | oxidoreductase activity            |
| CA4617 | 1.0 | 1.0 | 1.0 | 1.0 | 1.0 | 1.0 | STB5     | 14302298..SIN3 binding protein (by homology   | orf19.3308  | 5760  | CaSTB5   | TRANSCRIPTION                                                                                 | DNA binding,transcription regulato |
| CA4618 | 1.0 | 1.0 | 1.0 | 1.0 | 0.9 | 1.0 | IPF5757  | 14304763..unknown function                    | orf19.3309  | 5757  | IPF5757  | No significant S.c. match                                                                     |                                    |
| CA4619 | 1.0 | 1.1 | 1.0 | 1.0 | 0.9 | 1.0 | IPF5756  | complemer unknown function                    | orf19.3310  | 5756  | IPF5756  | No significant S.c. match                                                                     |                                    |
| CA4620 | 1.0 | 1.0 | 1.0 | 1.0 | 1.0 | 1.0 | IFD3     | 14308373..OXIDOREDUCTASE (by homolog          | orf19.3311  | 5754  | CaIFD3   | C-compound and carbohydrate metabolism ENERGY                                                 |                                    |
| CA4621 | 1.0 | 1.1 | 1.0 | 0.9 | 1.0 | 0.9 | IPF5753  | 14309660..unknown function                    | orf19.3312  | 5753  | IPF5753  | UNCLASSIFIED PROTEINS                                                                         | molecular_function unknown         |
| CA4622 | 1.1 | 1.1 | 0.9 | 1.1 | 1.0 | 1.1 | IPF5751  | complemer TRAPP subunit of 20 kDa involvec    | orf19.3314  | 5751  | IPF5751  | CELLULAR TRANSPORT AND TRANSPORT MECHANISMS SUBCELL                                           | molecular_function unknown         |
| CA4623 | 1.1 | 1.1 | 1.0 | 1.0 | 1.0 | 0.9 | CTA9     | 14312715..Putative transcriptional regulator  | orf19.3315  | 5750  | CaCTA9   | No significant S.c. match                                                                     |                                    |
| CA4624 | 1.0 | 1.0 | 0.9 | 1.0 | 1.1 | 1.0 | IPF5747  | complemer unknown function                    | orf19.3318  | 5747  | IPF5747  | UNCLASSIFIED PROTEINS                                                                         | molecular_function unknown         |
| CA4625 | 0.9 | 0.9 | 1.0 | 1.1 | 1.1 | 1.0 | IPF5742  | 14317478..thioredoxin-like protein (by homolo | orf19.3319  | 5742  | IPF5742  | CELL CYCLE AND DNA PROCESSING ""PROTEIN FATE [folding modification destination] """"CELL RESC |                                    |
| CA4626 | 1.0 | 1.0 | 1.0 | 1.0 | 1.0 | 1.0 | MR57     | 14319204..suppressor splicing defects (by ho  | orf19.1083  | 5739  | CaMR57   | UNCLASSIFIED PROTEINS                                                                         | molecular_function unknown         |
| CA4627 | 1.0 | 0.9 | 0.9 | 0.9 | 0.9 | 1.0 | DUT1     | complemer dUTP pyrophosphatas:dUTPase [(      | orf19.1083; | 5736  | CaDUT1   | Nucleotide metabolism                                                                         | hydrolase activity                 |
| CA4628 | 1.0 | 0.9 | 1.0 | 1.0 | 0.9 | 1.0 | IPF13704 | 14324792..unknown function                    |             | 13704 | IPF13704 | No significant S.c. match                                                                     |                                    |
| CA4629 | 1.0 | 1.0 | 0.9 | 1.0 | 1.0 | 1.1 | IPF13709 | 14329052..unknown function                    | orf19.335   | 13709 | IPF13709 | CELL CYCLE AND DNA PROCESSING ""PROTEIN FATE [folding modification destination] ""SUBCELLUL   |                                    |
| CA4630 | 1.1 | 1.0 | 0.9 | 1.0 | 1.0 | 1.0 | IPF1537  | complemer putative adrenodoxin and ferrodox   | orf19.336   | 1537  | IPF1537  | CLASSIFICATION NOT YET CLEAR-CUT                                                              | transporter activity               |
| CA4631 | 1.0 | 1.0 | 0.9 | 1.1 | 0.9 | 1.0 | VTI1     | complemer v-SNARE involved in Golgi retrogr   | orf19.337   | 1535  | CaVTI1   | PROTEIN FATE [folding modification destination] ""CELLULAR TRANSP                             | transporter activity               |
| CA4632 | 1.3 | 1.6 | 1.2 | 1.6 | 1.3 | 1.4 | IPF1531  | complemer unknown function                    | orf19.338   | 1531  | IPF1531  | UNCLASSIFIED PROTEINS                                                                         | molecular_function unknown         |
| CA4633 | 1.0 | 1.0 | 1.0 | 1.1 | 1.1 | 1.2 | NDH1     | complemer Mitochondrial NADH dehydrogena      | orf19.339   | 1529  | CaNDH1   | ENERGY SUBCELLULAR LOCALISATION                                                               | transporter activity               |
| CA4634 | 0.9 | 1.0 | 1.0 | 1.0 | 1.0 | 1.0 | IPF1526  | complemer unknown function                    | orf19.340   | 1526  | IPF1526  | TRANSCRIPTION CELLULAR TRANSPORT AND TRANSPORT MECH                                           | molecular_function unknown         |
| CA4635 | 0.9 | 0.9 | 1.0 | 1.0 | 1.0 | 1.0 | IPF1524  | complemer putative multidrug resistance prote | orf19.341   | 1524  | IPF1524  | CELL RESCUE DEFENSE AND VIRULENCE ""TRANSPORT FACILITATION                                    |                                    |
| CA4636 | 1.0 | 0.9 | 0.9 | 1.0 | 1.0 | 1.0 | IPF1520  | complemer unknown function                    | orf19.342   | 1520  | IPF1520  | No significant S.c. match                                                                     |                                    |
| CA4637 | 1.1 | 1.0 | 1.0 | 1.0 | 0.9 | 1.0 | IPF1514  | complemer unknown function                    | orf19.344   | 1514  | IPF1514  | No significant S.c. match                                                                     |                                    |
| CA4638 | 0.9 | 1.0 | 1.1 | 1.0 | 0.9 | 1.0 | UGA2     | 14352333..succinate-semialdehyde dehydrog     | orf19.345   | 1510  | CaUGA2   | Amino acid metabolism                                                                         | oxidoreductase activity            |
| CA4639 | 1.0 | 1.0 | 0.9 | 1.1 | 1.0 | 1.0 | IPF1509  | complemer putative alanine transaminase (by   | orf19.346   | 1509  | IPF1509  | Amino acid metabolism Nitrogen and sulphur metabolism                                         | transferase activity               |
| CA4640 | 1.0 | 1.0 | 1.0 | 1.0 | 0.8 | 1.1 | IPF1506  | 14358098..unknown function                    | orf19.347   | 1506  | IPF1506  | No significant S.c. match                                                                     |                                    |
| CA4641 | 1.0 | 1.0 | 1.0 | 1.0 | 1.0 | 1.0 | IPF1505  | 14360691..similar to saccharomyces cerevisi   | orf19.348   | 1505  | IPF1505  | C-compound and carbohydrate metabolism CELL FATE CONTROL OF CELLULAR ORGANIZATION SUB         |                                    |
| CA4642 | 1.0 | 1.2 | 1.0 | 0.9 | 0.9 | 1.0 | IPF1500  | complemer similar to Saccharomyces cerevisi   | orf19.349   | 1500  | IPF1500  | CONTROL OF CELLULAR ORGANIZATION                                                              | molecular_function unknown         |
| CA4643 | 1.0 | 1.0 | 1.0 | 1.1 | 1.0 | 1.0 | PRE9     | complemer 20S proteasome subunit Y13 (alp     | orf19.350   | 1499  | CaPRE9   | PROTEIN FATE [folding modification destination] ""SUBCELLULAR LOC                             | peptidase activity                 |
| CA4644 | 0.9 | 1.0 | 1.0 | 1.0 | 1.1 | 1.0 | IPF1497  | 14366875..unknown function                    | orf19.351   | 1497  | IPF1497  | UNCLASSIFIED PROTEINS                                                                         | molecular_function unknown         |
| CA4645 | 1.0 | 1.0 | 1.0 | 1.0 | 1.0 | 1.0 | IPF1496  | 14367588..unknown function                    | orf19.352   | 1496  | IPF1496  | UNCLASSIFIED PROTEINS                                                                         |                                    |
| CA4646 | 0.9 | 1.0 | 1.0 | 0.9 | 1.0 | 1.1 | IPF1495  | complemer unknown function                    | orf19.353   | 1495  | IPF1495  | PROTEIN FATE [folding modification destination]                                               |                                    |
| CA4647 | 1.0 | 1.0 | 1.0 | 0.9 | 1.0 | 1.0 | IPF1493  | 14370664..similarity to E.coli X-Pro aminope  | orf19.354   | 1493  | IPF1493  | PROTEIN FATE [folding modification destination]                                               | peptidase activity                 |
| CA4648 | 1.1 | 1.0 | 1.0 | 1.0 | 1.1 | 1.0 | IPF9864  | complemer similar to Saccharomyces cerevisi   | orf19.1191; | 9864  | IPF9864  | SUBCELLULAR LOCALISATION                                                                      | structural molecule activity       |
| CA4649 | 1.0 | 1.1 | 1.0 | 0.9 | 1.0 | 1.0 | GPX4     | 14386219..glutathione peroxidase (by homolo   | orf19.4436  | 9860  | CaGPX4   | CELL RESCUE DEFENSE AND VIRULENCE                                                             |                                    |
| CA4650 | 1.0 | 1.0 | 1.0 | 1.0 | 1.0 | 1.0 | ISW1.3   | complemer ATPase component of a four subu     | orf19.1191; | 9859  | CaISW1.3 | TRANSCRIPTION                                                                                 | hydrolase activity                 |
| CA4651 | 0.9 | 1.0 | 1.0 | 1.1 | 1.0 | 1.0 | IPF3121  | complemer unknown function                    | orf19.1191; | 3121  | IPF3121  | CELL CYCLE AND DNA PROCESSING TRANSCRIPTION SUBCELLUL                                         | transcription regulator activity   |
| CA4652 | 1.0 | 1.0 | 1.0 | 1.1 | 1.1 | 0.9 | IPF3105  | complemer Unknown function                    | orf19.4439  | 3105  | IPF3105  | No significant S.c. match                                                                     |                                    |
| CA4653 | 0.9 | 1.0 | 1.0 | 1.0 | 1.0 | 1.0 | IPF3102  | complemer similar to Saccharomyces cerevisi   | orf19.4440  | 3102  | IPF3102  | CELLULAR TRANSPORT AND TRANSPORT MECHANISMS SUBCELL                                           | transporter activity               |
| CA4654 | 1.0 | 1.0 | 0.9 | 1.0 | 1.0 | 1.0 | IPF3101  | 14418332..unknown function                    | orf19.4441  | 3101  | IPF3101  | CELL CYCLE AND DNA PROCESSING SUBCELLULAR LOCALISATION                                        | DNA binding                        |
| CA4655 | 1.0 | 1.1 | 1.0 | 1.0 | 1.0 | 1.0 | IPF3098  | 14420313..Putative mannosyltransferase (by    | orf19.4442  | 3098  | IPF3098  | C-compound and carbohydrate metabolism ""Lipid fatty-acid and isopren                         | transferase activity               |
| CA4656 | 1.1 | 1.1 | 1.0 | 1.1 | 1.0 | 1.0 | IPF3095  | complemer unknown function Ypd1 [Canc         | orf19.4443  | 3095  | IPF3095  | REGULATION OF/INTERACTION WITH CELLULAR ENVIRONMENT P                                         | transferase activity               |
| CA4657 | 1.0 | 1.0 | 1.0 | 1.0 | 1.0 | 1.1 | IPF3094  | complemer 4-nitrophenyl phosphatase (by hor   | orf19.4444  | 3094  | IPF3094  | Phosphate metabolism SUBCELLULAR LOCALISATION                                                 | hydrolase activity                 |
| CA4658 | 1.0 | 1.0 | 0.9 | 0.9 | 1.0 | 1.0 | IPF3092  | complemer unknown function                    | orf19.4445  | 3092  | IPF3092  | No significant S.c. match                                                                     |                                    |
| CA4659 | 1.0 | 0.9 | 0.9 | 1.1 | 1.1 | 1.1 | IPF17754 | 14428084..low affinity high capacity ammoniu  | orf19.4446  | 17754 | IPF17754 | CELLULAR TRANSPORT AND TRANSPORT MECHANISMS SUBCELLULAR LOCALISATION TRANSP                   |                                    |
| CA4660 | 1.1 | 1.0 | 1.0 | 0.9 | 1.0 | 1.0 | YMC1     | complemer mitochondrial carrier protein (MCF  | orf19.4447  | 6563  | CaYMC1   | CELLULAR TRANSPORT AND TRANSPORT MECHANISMS SUBCELL                                           | transporter activity               |
| CA4661 | 1.0 | 1.1 | 0.9 | 1.0 | 1.0 | 1.0 | IPF6561  | complemer unknown function                    | orf19.4448  | 6561  | IPF6561  | UNCLASSIFIED PROTEINS                                                                         | molecular_function unknown         |
| CA4662 | 1.0 | 1.0 | 1.0 | 0.9 | 1.1 | 1.1 | LYS7     | complemer Copper chaperone for superoxide     | orf19.4449  | 6557  | CaLYS7   | PROTEIN FATE [folding modification destination] """"CELL RESCUE DE                            | chaperone activity                 |
| CA4663 | 1.0 | 1.0 | 1.0 | 1.0 | 1.0 | 0.9 | IPF6554  | 14437834..unknown function                    | orf19.4450  | 6554  | IPF6554  | TRANSCRIPTION SUBCELLULAR LOCALISATION                                                        | molecular_function unknown         |
| CA4665 | 1.0 | 1.0 | 0.9 | 1.0 | 1.1 | 1.0 | IPF6548  | 14440757..translation elongation factor eEF4  | orf19.4451  | 6548  | IPF6548  | PROTEIN SYNTHESIS                                                                             | translation regulator activity     |

|        |     |     |     |     |     |     |          |                                                                    |                             |       |            |                                                                      |                                                                      |
|--------|-----|-----|-----|-----|-----|-----|----------|--------------------------------------------------------------------|-----------------------------|-------|------------|----------------------------------------------------------------------|----------------------------------------------------------------------|
| CA4666 | 1.0 | 1.0 | 1.0 | 1.1 | 1.0 | 1.0 | IPF6542  | 14445472..unknown function                                         | orf19.4455                  | 6542  | IPF6542    | UNCLASSIFIED PROTEINS                                                | molecular_function unknown                                           |
| CA4667 | 1.0 | 1.0 | 1.0 | 1.0 | 1.1 | 1.1 | GAP5     | complemer General amino acid permease (by orf19.4456               | orf19.4456                  | 6541  | CaGAP5     | Amino acid metabolism                                                | CELLULAR TRANSPORT AND TRANSPORT MECHANISMS SUBCELLULAR LOCALISATION |
| CA4668 | 1.0 | 1.0 | 1.0 | 1.1 | 1.1 | 1.0 | ROM2     | complemer GDP/GTP exchange factor for Rho orf19.906                | orf19.906                   | 4544  | CaROM2     | C-compound and carbohydrate metabolism                               | CELL FATE CONTROL OF (signal transducer activity                     |
| CA4669 | 1.0 | 1.0 | 1.0 | 1.0 | 0.9 | 1.0 | IPF4537  | 14458495..putative permease (by homology)                          | orf19.905                   | 4537  | IPF4537    | TRANSPORT FACILITATION                                               | transporter activity                                                 |
| CA4670 | 0.9 | 1.0 | 1.0 | 1.0 | 1.0 | 1.0 | IPF4536  | 14460038..unknown function                                         | hypothetical orf19.904      | 4536  | IPF4536    | Amino acid metabolism                                                | SUBCELLULAR LOCALISATION                                             |
| CA4671 | 1.0 | 0.7 | 2.7 | 3.5 | 2.4 | 2.2 | GPM1     | 14461584..phosphoglycerate mutase (by hom orf19.903                | orf19.903                   | 4535  | CaGPM1     | C-compound and carbohydrate metabolism                               | ENERGY SUBCELLULAR LOCALISATION isomerase activity                   |
| CA4672 | 1.0 | 1.1 | 1.0 | 1.2 | 1.1 | 1.2 | IPF3659  | 14462809..similar to Saccharomyces cerevisiae orf19.900            | orf19.900                   | 3659  | IPF3659    | TRANSCRIPTION CELLULAR TRANSPORT AND TRANSPORT MECHANISMS            | structural molecule activity                                         |
| CA4673 | 1.0 | 1.1 | 1.0 | 1.0 | 0.9 | 1.1 | IPF3661  | 14465338..unknown function                                         | orf19.899                   | 3661  | IPF3661    | No significant S.c. match                                            |                                                                      |
| CA4674 | 1.0 | 1.1 | 1.1 | 1.1 | 1.1 | 1.0 | HEM2     | 14466704..Porphobilinogen synthase (by hom orf19.898               | orf19.898                   | 3663  | CaHEM2     | Metabolism of vitamins cofactors and prosthetic groups               | SUBCELLULAR LOCALISATION lyase activity                              |
| CA4675 | 1.0 | 1.1 | 1.1 | 0.9 | 1.0 | 1.1 | IPF3664  | complemer unknown function                                         | orf19.897                   | 3664  | IPF3664    | CLASSIFICATION NOT YET CLEAR-CUT                                     | molecular_function unknown                                           |
| CA4676 | 1.1 | 1.1 | 1.1 | 1.0 | 1.0 | 1.0 | HK1      | 14469675..Histidine kinase                                         | histidine kinase orf19.896  | 3668  | CaHK1      | C-compound and carbohydrate metabolism                               | CELLULAR COMMUNICATION/SIGNAL TRANSDUCTION MECHANISMS                |
| CA4677 | 1.0 | 1.2 | 1.1 | 1.0 | 1.1 | 1.0 | HOG1     | complemer Ser/thr protein kinase (unnamed porf19.895               | orf19.895                   | 3669  | CaHOG1     | C-compound and carbohydrate metabolism                               | CELL RESCUE DEFENSE protein kinase activity, signal transduction     |
| CA4678 | 1.0 | 1.0 | 1.0 | 1.1 | 1.0 | 1.0 | IPF3670  | 14478750..unknown function                                         | orf19.894                   | 3670  | IPF3670    | CELL CYCLE AND DNA PROCESSING CELL FATE                              | enzyme regulator activity                                            |
| CA4679 | 0.9 | 0.9 | 1.0 | 0.9 | 0.9 | 1.0 | IPF3674  | 14481512..unknown function                                         | orf19.893                   | 3674  | IPF3674    | No significant S.c. match                                            |                                                                      |
| CA4680 | 1.0 | 1.2 | 1.0 | 1.0 | 1.0 | 1.1 | AMD1     | 14483896..AMP deaminase (by homology)                              | orf19.891                   | 3677  | CaAMD1     | Nucleotide metabolism                                                | Purine ribonucleotide metabolism ENERGY                              |
| CA4681 | 0.9 | 0.9 | 1.1 | 1.0 | 1.0 | 1.0 | IPF3679  | 14486567..similar to Saccharomyces cerevisiae orf19.889            | orf19.889                   | 3679  | IPF3679    | TRANSCRIPTION                                                        | transferase activity                                                 |
| CA4682 | 1.0 | 1.0 | 0.9 | 1.1 | 0.9 | 1.1 | IPF3687  | 14488504..similar to Saccharomyces cerevisiae orf19.886            | orf19.886                   | 3687  | IPF3687    | PROTEIN FATE [folding modification destination]                      | CELLULAR TRANSPORT protein binding                                   |
| CA4683 | 1.0 | 0.9 | 1.0 | 0.9 | 1.0 | 1.0 | HSP78.3F | complemer heat shock protein of clp family orf19.884               | orf19.884                   | 9007  | CaHSP78.3F | PROTEIN FATE [folding modification destination]                      | CELL RESCUE DEFENSE AND VIRULENCE                                    |
| CA4684 | 1.1 | 1.0 | 1.1 | 1.0 | 1.1 | 1.0 | HSP78.5F | complemer heat shock protein of heat shock orf19.882               | orf19.882                   | 9010  | CaHSP78.5F | PROTEIN FATE [folding modification destination]                      | CELL RESCUE DEFENSE AND VIRULENCE                                    |
| CA4685 | 1.0 | 1.0 | 1.0 | 1.1 | 1.0 | 1.2 | IPF9013  | complemer unknown function                                         | orf19.881                   | 9013  | IPF9013    | CELL FATE CONTROL OF CELLULAR ORGANIZATION                           | molecular_function unknown                                           |
| CA4686 | 1.0 | 1.0 | 1.0 | 1.0 | 1.0 | 1.0 | IPF9015  | 14498374..unknown function                                         | orf19.880                   | 9015  | IPF9015    | UNCLASSIFIED PROTEINS                                                | molecular_function unknown                                           |
| CA4687 | 0.9 | 0.9 | 1.0 | 0.9 | 0.9 | 1.1 | IPF9017  | complemer similar to Saccharomyces cerevisiae orf19.879            | orf19.879                   | 9017  | IPF9017    | CELLULAR TRANSPORT AND TRANSPORT MECHANISMS                          | CELL FATE protein binding                                            |
| CA4688 | 1.0 | 1.0 | 1.0 | 1.0 | 1.0 | 1.0 | NBN1     | 14503979..involved in chromatin remodeling orf19.878               | orf19.878                   | 9018  | CaNBN1     | SUBCELLULAR LOCALISATION                                             | enzyme regulator activity                                            |
| CA4689 | 1.0 | 1.0 | 1.0 | 1.2 | 0.9 | 1.0 | IPF9020  | 14505254..unknown function                                         | orf19.8495                  | 9020  | IPF9020    | No significant S.c. match                                            |                                                                      |
| CA4690 | 0.9 | 1.0 | 1.0 | 1.0 | 1.0 | 0.9 | IPF3959  | 14506309..unknown function                                         | orf19.8494                  | 3959  | IPF3959    | No significant S.c. match                                            |                                                                      |
| CA4691 | 0.9 | 1.0 | 0.9 | 1.0 | 1.0 | 0.9 | IPF3958  | complemer unknown function                                         | orf19.874                   | 3958  | IPF3958    | UNCLASSIFIED PROTEINS                                                |                                                                      |
| CA4692 | 1.0 | 1.0 | 1.0 | 1.0 | 0.9 | 1.0 | COX6.3   | complemer cytochrome-c oxidase subunit VI, 3-prime end             | orf19.872                   | 3955  | CaCOX6.3   | ENERGY SUBCELLULAR LOCALISATION                                      | oxidoreductase activity                                              |
| CA4693 | 1.0 | 1.0 | 1.0 | 1.0 | 1.0 | 1.0 | IPF3952  | complemer unknown function                                         | orf19.872                   | 3952  | IPF3952    | No significant S.c. match                                            |                                                                      |
| CA4694 | 1.0 | 1.1 | 1.1 | 0.9 | 1.0 | 1.0 | IPF3950  | 14514082..unknown function                                         | orf19.8490                  | 3950  | IPF3950    | CELL CYCLE AND DNA PROCESSING TRANSCRIPTION SUBCELLULAR LOCALISATION |                                                                      |
| CA4695 | 1.1 | 1.0 | 1.1 | 0.9 | 1.1 | 1.1 | IPF4229  | complemer unknown function                                         | orf19.6923                  | 4229  | IPF4229    | TRANSCRIPTION SUBCELLULAR LOCALISATION                               | transcription regulator activity                                     |
| CA4696 | 1.0 | 1.0 | 0.9 | 0.9 | 0.8 | 0.9 | HTA1     | complemer Histone H2A (by homology)                                | orf19.6924                  | 4226  | CaHTA1     | TRANSCRIPTION SUBCELLULAR LOCALISATION                               | DNA binding                                                          |
| CA4697 | 1.1 | 1.0 | 0.9 | 0.8 | 0.9 | 1.2 | HTB1     | 14527408..Histone H2B (by homology)                                | orf19.6925                  | 4223  | CaHTB1     | TRANSCRIPTION SUBCELLULAR LOCALISATION                               | DNA binding                                                          |
| CA4698 | 1.1 | 1.0 | 1.0 | 1.0 | 1.0 | 1.1 | CDC25    | complemer cell division cycle protein orf19.6926                   | orf19.6926                  | 4222  | CaCDC25    | Nitrogen and sulphur metabolism                                      | Nucleotide metabolism C-compound and enzyme regulator activity       |
| CA4699 | 0.9 | 1.0 | 1.1 | 1.0 | 1.1 | 1.0 | IPF4220  | 14532785..similar to Saccharomyces cerevisiae orf19.6927           | orf19.6927                  | 4220  | IPF4220    | PROTEIN FATE [folding modification destination]                      | SUBCELLULAR LOCALISATION molecular_function unknown                  |
| CA4700 | 1.0 | 1.1 | 1.0 | 1.0 | 1.0 | 1.0 | SAP9     | 14535383..aspartyl proteinase 9 (secreted as orf19.6928            | orf19.6928                  | 4215  | CaSAP9     | PROTEIN FATE [folding modification destination]                      | SUBCELLULAR LOCALISATION peptidase activity                          |
| CA4701 | 0.9 | 0.9 | 1.0 | 1.0 | 1.0 | 1.1 | IPF4214  | complemer unknown function                                         | orf19.6929                  | 4214  | IPF4214    | UNCLASSIFIED PROTEINS                                                | molecular_function unknown                                           |
| CA4702 | 0.9 | 0.9 | 1.0 | 1.1 | 1.0 | 1.1 | IPF4213  | 14538736..unknown function                                         | orf19.6930                  | 4213  | IPF4213    | No significant S.c. match                                            |                                                                      |
| CA4703 | 0.9 | 0.9 | 0.9 | 1.0 | 1.0 | 1.0 | CLP1     | 14539673..probable cleavage/polyadenylation orf19.6931             | orf19.6931                  | 4212  | CaCLP1     | TRANSCRIPTION SUBCELLULAR LOCALISATION                               | RNA binding                                                          |
| CA4704 | 0.9 | 1.0 | 1.0 | 0.9 | 0.9 | 0.9 | RRD2     | complemer phosphotyrosyl phosphatase orf19.6933                    | orf19.6933                  | 4207  | CaRRD2     | UNCLASSIFIED PROTEINS                                                | protein phosphatase activity                                         |
| CA4705 | 0.9 | 1.1 | 1.0 | 1.0 | 1.0 | 1.1 | IPF4206  | 14542348..unknown function                                         | orf19.6934                  | 4206  | IPF4206    | CELL RESCUE DEFENSE AND VIRULENCE                                    |                                                                      |
| CA4706 | 1.0 | 0.9 | 1.0 | 0.9 | 0.9 | 1.0 | RAD53    | complemer protein kinase                                           | orf19.6936                  | 4205  | CaRAD53    | CELL CYCLE AND DNA PROCESSING CELLULAR COMMUNICATION                 | protein kinase activity                                              |
| CA4707 | 0.9 | 0.9 | 1.0 | 1.1 | 1.0 | 1.0 | PTR21    | complemer peptide transporter                                      | orf19.6937                  | 4202  | CaPTR21    | CELLULAR TRANSPORT AND TRANSPORT MECHANISMS                          | SUBCELLULAR TRANSPORTER activity                                     |
| CA4708 | 0.9 | 1.0 | 0.9 | 1.0 | 1.0 | 1.0 | MEU1     | complemer regulator of ADH2 expression (by orf19.6938              | orf19.6938                  | 5890  | CaMEU1     | Nucleotide metabolism                                                | Purine ribonucleotide metabolism                                     |
| CA4709 | 1.0 | 1.2 | 1.1 | 1.0 | 1.0 | 1.0 | IPF5895  | complemer unknown function                                         | orf19.6941                  | 5895  | IPF5895    | UNCLASSIFIED PROTEINS                                                | transferase activity                                                 |
| CA4710 | 1.0 | 1.0 | 1.0 | 0.9 | 0.9 | 1.0 | ORC3     | 14556103..Origin recognition complex (by hom orf19.6942            | orf19.6942                  | 5897  | CaORC3     | CELL CYCLE AND DNA PROCESSING TRANSCRIPTION CELL FATE                | DNA binding                                                          |
| CA4711 | 1.1 | 1.0 | 0.9 | 0.9 | 0.9 | 1.0 | PHB1     | 14559208..Prohibitin, antiproliferative protein orf19.6944         | orf19.6944                  | 5903  | CaPHB1     | CELL CYCLE AND DNA PROCESSING                                        | molecular_function unknown                                           |
| CA4712 | 0.9 | 1.0 | 1.0 | 1.1 | 1.0 | 1.0 | GTT1.3   | complemer glutathione S-transferase, 3-prime orf19.6947            | orf19.6947                  | 5904  | CaGTT1.3   | CELL RESCUE DEFENSE AND VIRULENCE                                    | transferase activity                                                 |
| CA4713 | 1.0 | 1.0 | 1.0 | 1.0 | 0.9 | 1.1 | CCC1     | complemer Transmembrane Ca2+ transporter orf19.6948                | orf19.6948                  | 5909  | CaCCC1     | REGULATION OF/INTERACTION WITH CELLULAR ENVIRONMENT                  | SUBCELLULAR LOCALISATION molecular_function unknown                  |
| CA4714 | 0.9 | 1.0 | 1.0 | 1.0 | 1.0 | 1.0 | IPF5912  | complemer unknown function                                         | orf19.6950                  | 5912  | IPF5912    | UNCLASSIFIED PROTEINS                                                | molecular_function unknown                                           |
| CA4715 | 1.1 | 1.0 | 1.0 | 0.9 | 1.1 | 1.1 | DPL1     | complemer dihydrosphingosine phosphate lyase orf19.6951            | orf19.6951                  | 16613 | CaDPL1     | Lipid fatty-acid and isoprenoid metabolism                           | lyase activity                                                       |
| CA4716 | 1.0 | 1.0 | 1.0 | 1.0 | 1.0 | 1.0 | IPF8666  | complemer unknown function                                         | orf19.6952                  | 8666  | IPF8666    | UNCLASSIFIED PROTEINS                                                | molecular_function unknown                                           |
| CA4717 | 1.1 | 1.0 | 0.9 | 1.0 | 1.1 | 1.1 | IPF8663  | complemer Unknown function                                         | orf19.6953                  | 8663  | IPF8663    | UNCLASSIFIED PROTEINS                                                | molecular_function unknown                                           |
| CA4718 | 1.0 | 1.0 | 1.0 | 0.9 | 1.0 | 1.0 | IPF8661  | complemer unknown function                                         | orf19.6955                  | 8661  | IPF8661    | UNCLASSIFIED PROTEINS                                                | chaperone activity                                                   |
| CA4719 | 0.9 | 1.0 | 1.0 | 1.0 | 1.0 | 1.0 | DAL51    | complemer allantoate permease (by homology orf19.6956              | orf19.6956                  | 8658  | CaDAL51    | CELLULAR TRANSPORT AND TRANSPORT MECHANISMS                          | SUBCELLULAR TRANSPORTER activity                                     |
| CA4720 | 1.0 | 1.0 | 1.0 | 1.0 | 1.0 | 1.0 | ECM18    | complemer Involved in cell wall biogenesis orf19.6958              | orf19.6958                  | 8656  | CaECM18    | CONTROL OF CELLULAR ORGANIZATION                                     | molecular_function unknown                                           |
| CA4721 | 1.0 | 1.0 | 1.1 | 1.0 | 0.8 | 1.1 | CPP1     | 14583857..probable protein-tyrosine protein-tyrosine orf19.1233    | orf19.1233                  | 15616 | CaCPP1     | CELL CYCLE AND DNA PROCESSING PROTEIN SYNTHESIS                      | REGULATORY protein phosphatase activity                              |
| CA4722 | 1.0 | 0.9 | 1.0 | 0.9 | 1.0 | 0.8 | SAC1     | complemer integral membrane protein localizer orf19.1232           | orf19.1232                  | 15617 | CaSAC1     | CELLULAR TRANSPORT AND TRANSPORT MECHANISMS                          | CONTROL OF/INTERACTION WITH CELLULAR ENVIRONMENT                     |
| CA4723 | 1.0 | 0.9 | 1.0 | 1.0 | 1.0 | 1.0 | IPF18177 | 14589045..Unknown function                                         | orf19.1232                  | 18177 | IPF18177   | UNCLASSIFIED PROTEINS                                                | molecular_function unknown                                           |
| CA4724 | 1.2 | 1.2 | 1.1 | 1.1 | 1.1 | 1.0 | PDC2     | 14590781..pyruvate decarboxylase pyruvate decarboxylase orf19.1232 | orf19.1232                  | 16151 | CaPDC2     | C-compound and carbohydrate metabolism                               | ENERGY SUBCELLULAR LOCALISATION transcription regulator activity     |
| CA4725 | 0.9 | 0.9 | 1.0 | 1.0 | 1.0 | 1.1 | PET100   | complemer cytochrome-c oxidase Pet100 protein [Candida orf19.1232  | orf19.1232                  | 16152 | CaPET100   | ENERGY                                                               | PROTEIN FATE [folding modification destination]                      |
| CA4726 | 1.1 | 1.0 | 1.0 | 0.9 | 0.9 | 1.0 | IPF12255 | 14594135..unknown function                                         | orf19.1232                  | 12255 | IPF12255   | CLASSIFICATION NOT YET CLEAR-CUT                                     | molecular_function unknown                                           |
| CA4727 | 1.0 | 1.0 | 1.1 | 1.1 | 1.0 | 1.0 | IPF12253 | complemer unknown function                                         | orf19.1232                  | 12253 | IPF12253   | No significant S.c. match                                            |                                                                      |
| CA4728 | 0.9 | 1.0 | 1.0 | 1.0 | 1.0 | 1.0 | VPS41.3F | complemer required for the vacuolar assembly orf19.1232            | orf19.1232                  | 12250 | CaVPS41.3F | PROTEIN FATE [folding modification destination]                      | SUBCELLULAR LOCALISATION enzyme regulator activity                   |
| CA4729 | 1.0 | 1.0 | 0.9 | 1.0 | 1.0 | 1.0 | VPS41.5F | complemer required for the vacuolar assembly orf19.1232            | orf19.1232                  | 12249 | CaVPS41.5F | PROTEIN FATE [folding modification destination]                      | SUBCELLULAR LOCALISATION                                             |
| CA4730 | 1.1 | 1.1 | 1.0 | 1.0 | 1.0 | 1.0 | IPF7737  | 14600420..unknown function                                         | orf19.1232                  | 7737  | IPF7737    | No significant S.c. match                                            |                                                                      |
| CA4731 | 0.9 | 1.0 | 1.0 | 1.0 | 1.0 | 1.0 | LIP3     | complemer Secretory lipase                                         | secretory lipase orf19.4856 | 7736  | CaLIP3     | Other virulence attributes                                           |                                                                      |
| CA4732 | 1.0 | 1.0 | 1.0 | 0.9 | 0.9 | 1.0 | IPF7733  | 14604926..unknown function                                         | orf19.4855                  | 7733  | IPF7733    | CLASSIFICATION NOT YET CLEAR-CUT                                     | molecular_function unknown                                           |
| CA4733 | 1.0 | 1.0 | 1.1 | 1.0 | 1.0 | 1.0 | IPF7732  | complemer similar to Saccharomyces cerevisiae orf19.4853           | orf19.4853                  | 7732  | IPF7732    | TRANSCRIPTION SUBCELLULAR LOCALISATION                               | transcription regulator activity                                     |
| CA4734 | 1.0 | 1.1 | 1.0 | 1.0 | 1.0 | 1.0 | TFA1     | 14608968..Large subunit of transcription factor orf19.4851         | orf19.4851                  | 7729  | CaTFA1     | TRANSCRIPTION SUBCELLULAR LOCALISATION                               | transcription regulator activity                                     |
| CA4735 | 1.0 | 0.9 | 1.0 | 1.0 | 0.9 | 1.0 | IPF7726  | 14610999..unknown function                                         | orf19.4850                  | 7726  | IPF7726    | UNCLASSIFIED PROTEINS                                                | molecular_function unknown                                           |
| CA4736 | 1.0 | 1.1 | 0.9 | 0.9 | 1.0 | 0.9 | IPF4503  | 14613866..unknown function                                         | orf19.4849                  | 4503  | IPF4503    | TRANSCRIPTION CELLULAR TRANSPORT AND TRANSPORT MECHANISMS            | molecular_function unknown                                           |
| CA4737 | 1.0 | 1.1 | 1.0 | 0.9 | 1.0 | 1.0 | SKI3     | complemer antiviral protein                                        | orf19.4848                  | 4502  | CaSKI3     | CELL RESCUE DEFENSE AND VIRULENCE                                    | SUBCELLULAR LOCALISATION translation regulator activity              |

|        |     |     |     |     |     |     |           |                                                            |       |           |                                                                                               |                                     |
|--------|-----|-----|-----|-----|-----|-----|-----------|------------------------------------------------------------|-------|-----------|-----------------------------------------------------------------------------------------------|-------------------------------------|
| CA4738 | 1.2 | 1.2 | 1.0 | 1.0 | 1.0 | 1.0 | IPF4500   | complemer putative GTP-binding protein (by horf19.4846     | 4500  | IPF4500   | UNCLASSIFIED PROTEINS                                                                         | molecular_function unknown          |
| CA4739 | 1.1 | 1.1 | 1.0 | 0.9 | 1.1 | 0.9 | IPF4498   | 14621356..unknown function orf19.4845                      | 4498  | IPF4498   | UNCLASSIFIED PROTEINS                                                                         | molecular_function unknown          |
| CA4740 | 1.1 | 1.1 | 1.0 | 1.1 | 1.1 | 1.0 | IPF4497   | 14622263..unknown function orf19.4844                      | 4497  | IPF4497   | UNCLASSIFIED PROTEINS                                                                         | molecular_function unknown          |
| CA4741 | 1.0 | 1.0 | 1.0 | 1.0 | 0.9 | 1.0 | IPF4496   | 14623971..unknown function orf19.4843                      | 4496  | IPF4496   | UNCLASSIFIED PROTEINS                                                                         | oxidoreductase activity             |
| CA4742 | 1.0 | 1.0 | 1.0 | 1.0 | 1.0 | 1.0 | SHY1      | 14627032..SURF homologue protein (by hom orf19.4841        | 4494  | CaSHY1    | ENERGY SUBCELLULAR LOCALISATION                                                               | chaperone activity                  |
| CA4743 | 1.0 | 1.1 | 1.1 | 1.1 | 1.1 | 1.0 | IPF4491   | complemer unknown function orf19.4839                      | 4491  | IPF4491   | UNCLASSIFIED PROTEINS                                                                         | molecular_function unknown          |
| CA4744 | 1.0 | 1.0 | 1.0 | 1.0 | 1.0 | 1.0 | IPF4489   | complemer unknown function orf19.4837                      | 4489  | IPF4489   | CELL CYCLE AND DNA PROCESSING SUBCELLULAR LOCALISATIO                                         | structural molecule activity        |
| CA4745 | 1.0 | 0.9 | 0.9 | 1.0 | 1.1 | 1.0 | URA1      | complemer dihydroorotate dehydrogenase orf19.4836          | 4487  | CaURA1    | No significant S.c. match                                                                     |                                     |
| CA4746 | 1.0 | 1.0 | 1.1 | 1.0 | 1.0 | 0.9 | IPF4485   | 14632338..unknown function orf19.4835                      | 4485  | IPF4485   | UNCLASSIFIED PROTEINS                                                                         | RNA binding                         |
| CA4747 | 1.0 | 1.1 | 1.0 | 0.9 | 1.0 | 1.0 | IPF4484   | complemer unknown function unknown [C orf19.4834           | 4484  | IPF4484   | C-compound and carbohydrate metabolism                                                        |                                     |
| CA4748 | 1.3 | 1.7 | 1.1 | 1.1 | 1.1 | 1.2 | MLS1      | complemer malate synthase malate syn orf19.4833            | 4483  | CaMLS1    | C-compound and carbohydrate metabolism ENERGY SUBCELLULAR L                                   | transferase activity                |
| CA4749 | 1.0 | 1.0 | 1.0 | 0.9 | 1.0 | 1.1 | IPF4481   | complemer unknown function orf19.4831                      | 4481  | IPF4481   | No significant S.c. match                                                                     |                                     |
| CA4750 | 1.1 | 1.1 | 1.0 | 1.0 | 0.9 | 1.0 | IPF4477   | complemer similar to Saccharomyces cerevisi orf19.4829     | 4477  | IPF4477   | Lipid fatty-acid and isoprenoid metabolism *****PROTEIN FATE [folding m                       | molecular_function unknown          |
| CA4751 | 1.0 | 1.0 | 1.0 | 1.0 | 0.9 | 1.0 | IPF11473  | complemer unknown function orf19.4828                      | 11473 | IPF11473  | No significant S.c. match                                                                     |                                     |
| CA4752 | 1.2 | 1.1 | 1.1 | 1.1 | 1.0 | 1.2 | ADE12     | complemer adenylosuccinate synthetase (by t orf19.4827     | 11474 | CaADE12   | Nucleotide metabolism Purine ribonucleotide metabolism SUBCELLULA                             | ligase activity                     |
| CA4753 | 1.0 | 1.1 | 1.0 | 1.0 | 0.9 | 1.0 | IDH1.3    | complemer isocitrate dehydrogenase (NAD+) orf19.4826       | 11475 | CaIDH1.3  | C-compound and carbohydrate metabolism ENERGY TRANSCRIPTION                                   | oxidoreductase activity             |
| CA4754 | 1.0 | 1.0 | 0.9 | 0.9 | 0.8 | 1.0 | IPF11479  | 14649594..unknown function orf19.4825                      | 11479 | IPF11479  | Metabolism of vitamins cofactors and prosthetic groups                                        | molecular_function unknown          |
| CA4755 | 1.1 | 0.9 | 1.0 | 1.0 | 1.0 | 1.0 | IPF11480  | complemer unknown function orf19.4824                      | 11480 | IPF11480  | No significant S.c. match                                                                     |                                     |
| CA4756 | 1.0 | 1.0 | 0.9 | 1.0 | 1.0 | 1.0 | LIP6      | 14653322..Secretory lipase orf19.4823                      | 11788 | CaLIP6    | Other virulence attributes                                                                    |                                     |
| CA4757 | 1.1 | 1.0 | 1.0 | 1.1 | 1.0 | 1.0 | LIP10     | 14655761..Secretory lipase orf19.4822                      | 11790 | CaLIP10   | Other virulence attributes                                                                    |                                     |
| CA4758 | 1.0 | 0.9 | 1.0 | 1.1 | 1.0 | 1.0 | PPR1      | complemer transcription factor regulating pyrin orf19.3986 | 9661  | CaPPR1    | Nucleotide metabolism TRANSCRIPTION SUBCELLULAR LOCALISAT                                     | DNA binding,transcription regulato  |
| CA4759 | 1.0 | 1.0 | 1.0 | 1.0 | 1.0 | 1.0 | IPF9655   | 14694521..unknown function orf19.3988                      | 9655  | IPF9655   | No significant S.c. match                                                                     |                                     |
| CA4760 | 1.0 | 1.0 | 1.1 | 1.0 | 0.9 | 1.0 | IPF9652   | 14696524..unknown function orf19.3990                      | 9652  | IPF9652   | UNCLASSIFIED PROTEINS                                                                         | nucleotidyltransferase activity     |
| CA4761 | 1.1 | 1.0 | 1.0 | 1.1 | 1.1 | 1.0 | IPF9650   | complemer lipase family protein containing se orf19.3991   | 9651  | IPF9650   | Lipid fatty-acid and isoprenoid metabolism                                                    | hydrolase activity                  |
| CA4762 | 1.0 | 1.0 | 1.0 | 0.9 | 1.0 | 1.1 | IPF9647   | complemer similar to Saccharomyces cerevisi orf19.3994     | 9647  | IPF9647   | C-compound and carbohydrate metabolism ***PROTEIN FATE [folding m                             | transferase activity                |
| CA4763 | 0.9 | 1.0 | 1.0 | 1.0 | 1.0 | 1.0 | IPF9645   | complemer similar to Saccharomyces cerevisi orf19.3995     | 9645  | IPF9645   | PROTEIN FATE [folding modification destination] ***CELL FATE                                  | peptidase activity                  |
| CA4764 | 1.1 | 1.1 | 1.0 | 1.0 | 1.0 | 0.9 | GPI10     | 14703600..required for Glycosyl Phosphatdyl orf19.3996     | 19803 | CaGPI10   | Lipid fatty-acid and isoprenoid metabolism ***CONTROL OF CELLULAR (molecular_function unknown |                                     |
| CA4765 | 0.1 | 0.3 | 0.6 | 0.4 | 0.2 | 0.2 | ADH1      | 14706501..alcohol dehydrogenase (by homok orf19.3997       | 17060 | CaADH1    | C-compound and carbohydrate metabolism SUBCELLULAR LOCALISATION                               |                                     |
| CA4766 | 1.0 | 0.9 | 0.9 | 0.9 | 0.9 | 1.1 | IPF13056  | complemer unknown function orf19.3998                      | 13056 | IPF13056  | No significant S.c. match                                                                     |                                     |
| CA4767 | 0.9 | 1.0 | 1.0 | 1.0 | 1.0 | 0.9 | IPF13054  | 14708705..unknown function orf19.3999                      | 13054 | IPF13054  | UNCLASSIFIED PROTEINS                                                                         |                                     |
| CA4768 | 1.0 | 1.0 | 1.0 | 0.9 | 1.0 | 1.0 | IPF9385   | 14717907..similar to Saccharomyces cerevisi orf19.4000     | 9385  | IPF9385   | Nucleotide metabolism Phosphate metabolism TRANSCRIPTION SUBC                                 | DNA binding,transcription regulato  |
| CA4769 | 0.9 | 1.0 | 1.0 | 1.0 | 1.0 | 1.1 | IPF9384   | 14720421..similar to Saccharomyces cerevisi orf19.4001     | 9384  | IPF9384   | ENERGY                                                                                        |                                     |
| CA4770 | 1.0 | 1.2 | 1.0 | 0.9 | 0.9 | 1.0 | IPF9382.3 | complemer similar to Saccharomyces cerevisi orf19.4002     | 9382  | IPF9382.3 | CELL CYCLE AND DNA PROCESSING CELLULAR COMMUNICATION                                          | protein kinase activity             |
| CA4771 | 0.9 | 1.1 | 1.0 | 1.0 | 1.0 | 0.8 | IPF3336   | complemer unknown function orf19.4003                      | 3336  | IPF3336   | CELLULAR TRANSPORT AND TRANSPORT MECHANISMS SUBCELL                                           | molecular_function unknown          |
| CA4772 | 1.0 | 1.0 | 1.2 | 1.0 | 0.9 | 1.0 | CCT3      | 14726652..Chaperonin (by homology) orf19.4004              | 3339  | CaCCT3    | PROTEIN FATE [folding modification destination] ***SUBCELLULAR LOC                            | chaperone activity                  |
| CA4773 | 1.0 | 0.9 | 1.0 | 1.0 | 1.0 | 1.1 | IPF3340   | complemer unknown function orf19.4005                      | 3340  | IPF3340   | UNCLASSIFIED PROTEINS                                                                         | transferase activity                |
| CA4774 | 1.1 | 1.0 | 1.1 | 1.0 | 1.0 | 1.0 | IPF3341   | 14729142..Unknown function orf19.4006                      | 3341  | IPF3341   | Metabolism of vitamins cofactors and prosthetic groups                                        | oxidoreductase activity             |
| CA4775 | 0.9 | 1.0 | 1.0 | 1.1 | 1.0 | 1.0 | IPF3342   | complemer Unknown function orf19.4007                      | 3342  | IPF3342   | UNCLASSIFIED PROTEINS                                                                         | molecular_function unknown          |
| CA4776 | 1.1 | 1.0 | 1.0 | 0.9 | 1.0 | 1.0 | CNB1      | complemer Protein phosphatase, Calcineurin l orf19.4009    | 3344  | CaCNB1    | TRANSCRIPTION REGULATION OF/INTERACTION WITH CELLULAR                                         | protein phosphatase activity        |
| CA4777 | 1.1 | 1.0 | 1.0 | 1.0 | 1.0 | 1.1 | PAN3      | 14732698..component of the Pab1p-depende orf19.4010        | 3345  | CaPAN3    | TRANSCRIPTION CONTROL OF CELLULAR ORGANIZATION                                                | RNA binding                         |
| CA4778 | 1.0 | 1.0 | 0.9 | 0.9 | 1.0 | 1.0 | IFJ1      | 14736026..Unknown function orf19.4011                      | 3348  | CaIFJ1    | UNCLASSIFIED PROTEINS                                                                         |                                     |
| CA4779 | 0.9 | 1.0 | 1.1 | 1.0 | 1.0 | 0.8 | IPF3351   | 14738137..unknown function orf19.4012                      | 3351  | IPF3351   | UNCLASSIFIED PROTEINS                                                                         | protein kinase activity,enzyme regi |
| CA4780 | 1.0 | 1.0 | 0.9 | 1.0 | 0.9 | 1.0 | IPF3352   | complemer unknown function orf19.4013                      | 3352  | IPF3352   | UNCLASSIFIED PROTEINS                                                                         | molecular_function unknown          |
| CA4781 | 0.9 | 1.0 | 1.0 | 1.0 | 1.0 | 1.1 | IPF3355   | 14740761..similar to Saccharomyces cerevisi orf19.4014     | 3355  | IPF3355   | CELL CYCLE AND DNA PROCESSING REGULATION OF/INTERACTION WITH CELLULAR ENVIRONME               |                                     |
| CA4783 | 1.1 | 1.1 | 0.9 | 0.9 | 0.9 | 0.9 | IPF3358   | 14742404..ubiquinol-cytochrome-c reductase orf19.4016      | 3358  | IPF3358   | ENERGY SUBCELLULAR LOCALISATION                                                               | transporter activity,oxidoreductase |
| CA4784 | 1.0 | 1.0 | 1.0 | 1.0 | 1.0 | 1.0 | IPF3359   | complemer Unknown function orf19.4017                      | 3359  | IPF3359   | No significant S.c. match                                                                     |                                     |
| CA4785 | 1.0 | 0.9 | 0.9 | 1.0 | 1.0 | 1.0 | IPF3361   | complemer putative mitochondrial ribosomal p orf19.4018    | 3361  | IPF3361   | PROTEIN SYNTHESIS SUBCELLULAR LOCALISATION                                                    | structural molecule activity        |
| CA4786 | 1.0 | 1.0 | 0.9 | 0.9 | 1.0 | 0.9 | IPF3362   | 14747411..Unknown function orf19.4019                      | 3362  | IPF3362   | UNCLASSIFIED PROTEINS                                                                         | molecular_function unknown          |
| CA4787 | 1.0 | 1.0 | 1.1 | 1.0 | 1.0 | 1.1 | IPF3364   | complemer Unknown function orf19.4021                      | 3364  | IPF3364   | No significant S.c. match                                                                     |                                     |
| CA4788 | 1.0 | 0.9 | 1.0 | 1.0 | 1.0 | 1.0 | SDH42     | complemer succinate dehydrogenase membra orf19.4022        | 3365  | CaSDH42   | C-compound and carbohydrate metabolism ENERGY SUBCELLULAR LOCALISATION                        |                                     |
| CA4789 | 1.0 | 1.0 | 1.1 | 1.0 | 1.1 | 0.9 | IPF3366   | complemer Mitochondrial ribosomal protein (b orf19.4023    | 3366  | IPF3366   | PROTEIN SYNTHESIS SUBCELLULAR LOCALISATION                                                    | structural molecule activity        |
| CA4790 | 1.0 | 1.0 | 1.0 | 1.0 | 1.0 | 1.0 | IPF3367   | 14750556..Riboflavin synthase (by homology) orf19.4024     | 3367  | IPF3367   | Metabolism of vitamins cofactors and prosthetic groups                                        | transferase activity                |
| CA4791 | 0.9 | 1.0 | 0.9 | 0.9 | 0.9 | 1.1 | IPF3370   | 14751414..similar to Saccharomyces cerevisi orf19.4025     | 3370  | IPF3370   | PROTEIN FATE [folding modification destination] *****CELL RESCUE DE                           | peptidase activity                  |
| CA4792 | 1.0 | 1.0 | 1.0 | 1.0 | 1.1 | 1.0 | HIS1      | complemer ATP phosphoribosyltraATP phosph orf19.4026       | 3372  | CaHIS1    | Amino acid metabolism                                                                         | transferase activity                |
| CA4793 | 1.0 | 1.1 | 1.0 | 0.9 | 1.0 | 0.9 | IPF3375   | complemer similar to Saccharomyces cerevisi orf19.4028     | 3375  | IPF3375   | PROTEIN FATE [folding modification destination] ***CONTROL OF CELL                            | transferase activity                |
| CA4794 | 1.0 | 1.0 | 1.1 | 1.1 | 1.0 | 0.9 | SQT1      | 14754614..suppresses dominant-t-unnamed p orf19.4029       | 3377  | CaSQT1    | PROTEIN FATE [folding modification destination] ***SUBCELLULAR LOC                            | molecular_function unknown          |
| CA4795 | 1.1 | 0.9 | 1.0 | 0.9 | 1.1 | 1.1 | IPF3378   | 14756058..similar to Saccharomyces cerevisi orf19.4030     | 3378  | IPF3378   | CELL CYCLE AND DNA PROCESSING SUBCELLULAR LOCALISATIO                                         | nucleotidyltransferase activity     |
| CA4796 | 1.0 | 1.0 | 1.0 | 1.0 | 1.0 | 0.9 | IPF3380   | complemer unknown function orf19.4031                      | 3380  | IPF3380   | UNCLASSIFIED PROTEINS                                                                         | molecular_function unknown          |
| CA4797 | 1.0 | 1.1 | 1.0 | 1.0 | 1.0 | 1.0 | PRP22     | complemer RNA-dependent ATPase (by homc orf19.4033         | 8801  | CaPRP22   | TRANSCRIPTION SUBCELLULAR LOCALISATION                                                        | RNA binding,helicase activity       |
| CA4798 | 1.0 | 1.0 | 0.9 | 1.0 | 1.0 | 1.0 | RPN5.3F   | 14763195..subunit of the regulatory particle o orf19.4032  | 8798  | CaRPN5.3  | PROTEIN FATE [folding modification destination] ***SUBCELLULAR LOC                            | peptidase activity                  |
| CA4799 | 1.0 | 1.0 | 1.0 | 1.0 | 0.9 | 1.0 | RPN5.5F   | 14763967..subunit of the regulatory particle o orf19.4034  | 8797  | CaRPN5.5  | PROTEIN FATE [folding modification destination] ***SUBCELLULAR LOCALISATION                   |                                     |
| CA4800 | 1.1 | 1.0 | 1.0 | 1.0 | 1.0 | 1.0 | IPF8796   | complemer putative GPI-anchored protein re orf19.4035      | 8796  | IPF8796   | SUBCELLULAR LOCALISATION                                                                      | molecular_function unknown          |
| CA4801 | 1.0 | 1.0 | 1.0 | 1.0 | 1.0 | 1.0 | APM1      | 14766973..AP-1 complex subunit, mu1 subun orf19.4036       | 8795  | CaAPM1    | PROTEIN FATE [folding modification destination] ***CELLULAR TRANSP                            | protein binding                     |
| CA4802 | 1.1 | 1.0 | 1.1 | 1.1 | 1.1 | 1.1 | ILV3      | complemer dihydroxyacid dehydratase (by hor orf19.4040     | 8790  | CaILV3    | Amino acid metabolism SUBCELLULAR LOCALISATION                                                | lyase activity                      |
| CA4803 | 1.2 | 1.2 | 1.0 | 0.9 | 1.0 | 0.9 | PEX4      | 14770965..E2 ubiquitin-conjugating enzyme - orf19.4041     | 7214  | CaPEX4    | PROTEIN FATE [folding modification destination] ***SUBCELLULAR LOCALISATION                   |                                     |
| CA4804 | 1.0 | 1.0 | 1.0 | 0.9 | 1.0 | 1.0 | ARO8      | complemer aromatic amino acid aminotransfer orf19.2098     | 1147  | CaARO8    | Amino acid metabolism                                                                         | transferase activity                |
| CA4805 | 1.0 | 1.0 | 1.0 | 1.0 | 1.0 | 1.0 | RAD5      | 14775461..DNA helicase (by homology) orf19.2097            | 1153  | CaRAD5    | CELL CYCLE AND DNA PROCESSING SUBCELLULAR LOCALISATIO                                         | hydrolase activity                  |
| CA4806 | 1.0 | 0.8 | 0.9 | 0.9 | 1.0 | 1.2 | IPF1155   | complemer Putative dipeptidase (by homology orf19.2095     | 1155  | IPF1155   | UNCLASSIFIED PROTEINS                                                                         | molecular_function unknown          |
| CA4807 | 0.9 | 1.0 | 1.0 | 0.9 | 1.0 | 1.0 | PDR6      | 14781435..Pleiotropic drug resistance regulat orf19.2094   | 1158  | CAPDR6    | PROTEIN FATE [folding modification destination] ***CELLULAR TRANSP                            | protein binding                     |
| CA4808 | 1.0 | 0.8 | 1.0 | 1.1 | 1.0 | 1.0 | RFA1      | complemer DNA replication factor A, 69 KD s orf19.2093     | 1160  | CaRFA1    | CELL CYCLE AND DNA PROCESSING CELL FATE SUBCELLULAR L                                         | C                                   |
| CA4809 | 1.0 | 1.0 | 0.9 | 1.0 | 1.1 | 1.1 | IPF1162   | complemer Cystathionine beta-lyase (by homc orf19.2092     | 1162  | IPF1162   | Amino acid metabolism                                                                         | lyase activity                      |
| CA4810 | 1.1 | 1.1 | 0.9 | 1.0 | 1.0 | 1.1 | IPF1164   | complemer Subunit NUHM of NADH:Ubiquino orf19.2091         | 1164  | IPF1164   | No significant S.c. match                                                                     |                                     |

|        |     |     |     |     |     |     |             |                                                             |            |       |            |                                                                                                |
|--------|-----|-----|-----|-----|-----|-----|-------------|-------------------------------------------------------------|------------|-------|------------|------------------------------------------------------------------------------------------------|
| CA4811 | 1.0 | 1.0 | 1.0 | 0.9 | 1.0 | 1.0 | ECM16       | complemer RNA helicase (by homology)                        | orf19.2090 | 1169  | CaECM16    | CONTROL OF CELLULAR ORGANIZATION SUBCELLULAR LOCALIS RNA binding,helicase activity             |
| CA4812 | 1.1 | 1.0 | 1.0 | 1.0 | 0.9 | 0.9 | IPF1171     | 14794532..Putative synaptobrevin (by homol                  | orf19.2089 | 1171  | IPF1171    | PROTEIN FATE [folding modification destination] ""SUBCELLULAR LOC transporter activity         |
| CA4813 | 1.1 | 1.0 | 1.0 | 1.0 | 1.0 | 1.0 | DPB4        | complemer DNA-directed DNA polymerase ep                    | orf19.2088 | 1174  | CaDPB4     | TRANSCRIPTION nucleotidyltransferase activity                                                  |
| CA4814 | 1.0 | 1.0 | 1.0 | 1.0 | 1.0 | 1.0 | SAS2        | 14796407..Zinc finger protein involved in sil               | orf19.2087 | 1176  | CaSAS2     | CELL CYCLE AND DNA PROCESSING TRANSCRIPTION CELL FATE transferase activity                     |
| CA4815 | 1.0 | 1.0 | 1.0 | 1.0 | 1.1 | 0.9 | CDH1        | complemer Substrate-specific activator of APC               | orf19.2084 | 20022 | CaCDH1     | CELL CYCLE AND DNA PROCESSING ""PROTEIN FATE [folding modif enzyme regulator activity          |
| CA4816 | 1.0 | 1.0 | 1.1 | 1.0 | 1.0 | 1.0 | IPF1183     | 14800278..putative aspartyl protease (by hom                | orf19.2082 | 1183  | IPF1183    | PROTEIN FATE [folding modification destination]                                                |
| CA4817 | 1.0 | 1.0 | 1.0 | 1.0 | 0.9 | 1.0 | POM152      | 14801845..Nuclear pore membrane glycoprot                   | orf19.2081 | 1191  | CaPOM15    | CELLULAR TRANSPORT AND TRANSPORT MECHANISMS SUBCELL structural molecule activity               |
| CA4818 | 1.0 | 1.0 | 0.8 | 0.9 | 0.9 | 0.7 | IPF1193     | complemer unknown function                                  | orf19.2079 | 1193  | IPF1193    | Metabolism of vitamins cofactors and prosthetic groups molecular_function unknown              |
| CA4819 | 1.1 | 1.0 | 1.0 | 1.0 | 0.9 | 1.0 | IPF1194     | 14806771..Similar to clathrin coat proteins                 | orf19.2078 | 1194  | IPF1194    | CELLULAR TRANSPORT AND TRANSPORT MECHANISMS SUBCELL protein binding                            |
| CA4820 | 1.1 | 1.1 | 1.1 | 0.9 | 1.1 | 0.9 | IPF1196     | 14809301..unknown function Hypothetical Zn                  | orf19.2077 | 1196  | IPF1196    | Amino acid metabolism Nitrogen and sulphur metabolism TRANSCRIPTION SUBCELLULAR LOCALISAT      |
| CA4821 | 1.0 | 1.0 | 1.0 | 1.0 | 1.0 | 1.0 | IPF1197     | 14812123..unknown function                                  | orf19.2076 | 1197  | IPF1197    | UNCLASSIFIED PROTEINS molecular_function unknown                                               |
| CA4822 | 1.0 | 1.1 | 1.1 | 1.0 | 0.9 | 1.0 | DFG5        | 14814010..Required for filamentous growth (t                | orf19.2075 | 1199  | CaDFG5     | CELL FATE molecular_function unknown                                                           |
| CA4823 | 1.1 | 1.1 | 0.9 | 0.9 | 1.0 | 1.0 | ERC3        | 14815987..ethionine resistance protein (by ho               | orf19.2073 | 1203  | CaERC3     | UNCLASSIFIED PROTEINS molecular_function unknown                                               |
| CA4824 | 0.9 | 1.0 | 1.0 | 1.0 | 1.0 | 1.0 | HNMT        | 14819106..Choline permease (by homology)                    | orf19.2072 | 1204  | CaHNMT     | CELLULAR TRANSPORT AND TRANSPORT MECHANISMS SUBCELL transporter activity                       |
| CA4825 | 0.9 | 1.0 | 1.0 | 0.9 | 0.9 | 1.0 | IPF1205     | 14821039..unknown function                                  | orf19.2071 | 1205  | IPF1205    | No significant S.c. match                                                                      |
| CA4826 | 1.0 | 1.0 | 1.1 | 1.0 | 1.0 | 1.0 | IPF1206     | 14822042..unknown function                                  | orf19.2070 | 1206  | IPF1206    | UNCLASSIFIED PROTEINS molecular_function unknown                                               |
| CA4827 | 1.0 | 1.0 | 0.9 | 0.9 | 1.1 | 0.9 | SMF2        | complemer Manganese transporter (by homok                   | orf19.2069 | 1207  | CaSMF2     | REGULATION OF/INTERACTION WITH CELLULAR ENVIRONMENT S transporter activity                     |
| CA4828 | 0.9 | 1.1 | 0.9 | 1.0 | 1.0 | 1.0 | IPF1209     | 14826300..unknown function                                  | orf19.2068 | 1209  | IPF1209    | UNCLASSIFIED PROTEINS                                                                          |
| CA4829 | 1.1 | 1.0 | 1.0 | 1.0 | 1.0 | 1.0 | IPF1210     | complemer similar to Saccharomyces cerevisi                 | orf19.2067 | 1210  | IPF1210    | Nitrogen and sulphur metabolism REGULATION OF/INTERACTION WI molecular_function unknown        |
| CA4830 | 1.0 | 1.0 | 0.9 | 1.0 | 0.9 | 0.9 | ATP8.EXON2  | complemer F1F0-ATPase complex, Atp8 subunit, exon 2         | orf19.2066 | 1211  | CaATP8.5   | ENERGY SUBCELLULAR LOCALISATION transporter activity                                           |
| CA4831 | 1.2 | 1.2 | 1.0 | 1.0 | 1.2 | 1.0 | IPF1212     | complemer unknown function                                  | orf19.2066 | 1212  | IPF1212    | UNCLASSIFIED PROTEINS transferase activity                                                     |
| CA4832 | 1.1 | 1.1 | 1.0 | 1.0 | 1.1 | 1.0 | DAL2        | complemer Allantoinase                                      | orf19.2065 | 1213  | CaDAL2     | Nitrogen and sulphur metabolism Nucleotide metabolism Purine ribonuc hydrolase activity        |
| CA4833 | 1.0 | 1.0 | 0.9 | 0.9 | 1.0 | 0.9 | IPF1216     | 14832576..unknown function                                  | orf19.2064 | 1216  | IPF1216    | CELL FATE UNCLASSIFIED PROTEINS                                                                |
| CA4834 | 1.0 | 1.0 | 1.0 | 1.1 | 0.9 | 1.0 | IPF1217     | 14836185..unknown function                                  | orf19.2063 | 1217  | IPF1217    | CELL FATE UNCLASSIFIED PROTEINS                                                                |
| CA4835 | 1.0 | 1.0 | 1.0 | 1.0 | 1.0 | 0.9 | IPF1218     | complemer Similar to superoxide dismutase (t                | orf19.2062 | 1218  | IPF1218    | CELL RESCUE DEFENSE AND VIRULENCE ""SUBCELLULAR LOCALISATION                                   |
| CA4836 | 0.8 | 0.1 | 0.1 | 0.1 | 0.2 | 0.1 | IPF1222     | complemer Similar to superoxide dismutase (t                | orf19.2060 | 1222  | IPF1222    | CELL RESCUE DEFENSE AND VIRULENCE ""SUBCELLULAR LOCALISATION                                   |
| CA4837 | 1.0 | 0.8 | 0.9 | 0.8 | 0.9 | 0.8 | IPF1228     | 14846438..unknown function                                  | orf19.2059 | 1228  | IPF1228    | No significant S.c. match                                                                      |
| CA4838 | 1.0 | 0.9 | 1.0 | 1.1 | 1.1 | 1.0 | YTA12       | 14848221..Protease of the SEC18/CDC48/P                     | orf19.2057 | 1231  | CaYTA12    | ENERGY ""PROTEIN FATE [folding modification destination] ""SUBCELL peptidase activity          |
| CA4839 | 1.0 | 1.0 | 1.0 | 1.0 | 1.1 | 1.0 | NPL6        | 14850998..Nuclear protein localization factor               | orf19.2055 | 1234  | CaNPL6     | PROTEIN FATE [folding modification destination] molecular_function unknown                     |
| CA4840 | 1.0 | 1.1 | 1.1 | 0.9 | 1.1 | 0.9 | IPF1235     | complemer unknown function                                  | orf19.2054 | 1235  | IPF1235    | PROTEIN FATE [folding modification destination] ""SUBCELLULAR LOCALISATION                     |
| CA4841 | 1.0 | 1.0 | 1.1 | 1.1 | 1.1 | 0.9 | IPF10355    | complemer unknown function                                  | orf19.3809 | 10355 | IPF10355   | Amino acid metabolism Nucleotide metabolism TRANSCRIPTION SUB transcription regulator activity |
| CA4842 | 1.0 | 1.0 | 1.1 | 1.0 | 1.0 | 0.8 | MTD1        | complemer methylenetetrahydrofolate dehydr                  | orf19.3810 | 6938  | CaMTD1     | Nucleotide metabolism Purine ribonucleotide metabolism SUBCELLULAR oxidoreductase activity     |
| CA4843 | 1.0 | 1.0 | 1.0 | 1.0 | 1.0 | 1.0 | GYP1        | complemer GTPase activating protein (by hom                 | orf19.3811 | 6940  | CaGYP1     | CELLULAR TRANSPORT AND TRANSPORT MECHANISMS enzyme regulator activity                          |
| CA4844 | 1.0 | 1.0 | 1.0 | 1.0 | 1.0 | 1.0 | PDR13       | complemer Drug resistance                                   | orf19.3812 | 6943  | CaPDR13    | CELL RESCUE DEFENSE AND VIRULENCE chaperone activity                                           |
| CA4845 | 1.0 | 1.0 | 1.0 | 1.0 | 1.0 | 1.0 | IPF6945.5F  | 14865030..unknown function, 5-prime end                     | orf19.3813 | 6945  | IPF6945.5f | No significant S.c. match                                                                      |
| CA4846 | 1.0 | 1.0 | 1.0 | 0.9 | 1.1 | 1.1 | IPF6945.3F  | 14865835..unknown function, 3-prime end                     | orf19.3814 | 6946  | IPF6945.3f | No significant S.c. match                                                                      |
| CA4847 | 0.9 | 0.9 | 1.0 | 0.9 | 1.0 | 0.9 | IPF6951     | 14867398..similar to Saccharomyces cerevisi                 | orf19.3815 | 6951  | IPF6951    | PROTEIN FATE [folding modification destination] peptidase activity                             |
| CA4848 | 1.0 | 1.0 | 1.0 | 0.9 | 0.9 | 1.1 | RTS2        | complemer Unknown function                                  | orf19.3817 | 6953  | CaRTS2     | CELL CYCLE AND DNA PROCESSING molecular_function unknown                                       |
| CA4849 | 1.0 | 1.0 | 1.0 | 1.0 | 1.0 | 0.9 | IPF6954     | 14871578..unknown function                                  | orf19.3818 | 6954  | IPF6954    | No significant S.c. match                                                                      |
| CA4850 | 1.1 | 1.1 | 1.1 | 1.0 | 1.1 | 1.0 | CIRT2       | 14873961..Transposase transposas                            | orf19.3820 | 3257  | CaCirt2    | CLASSIFICATION NOT YET CLEAR-CUT                                                               |
| CA4851 | 1.0 | 0.9 | 1.0 | 1.0 | 1.0 | 0.9 | IPF5818     | 14881168..unknown function                                  | orf19.3821 | 5818  | IPF5818    | No significant S.c. match                                                                      |
| CA4852 | 1.0 | 0.9 | 1.0 | 1.0 | 1.1 | 0.8 | SCS7        | complemer Required for hydroxylation of cer                 | orf19.3822 | 5819  | CaSCS7     | Lipid fatty-acid and isoprenoid metabolism ""SUBCELLULAR LOCALISA oxidoreductase activity      |
| CA4853 | 1.1 | 1.0 | 0.9 | 0.9 | 1.0 | 1.0 | IPF5823     | complemer similar to Saccharomyces cerevisi                 | orf19.3823 | 5823  | IPF5823    | CELL CYCLE AND DNA PROCESSING ""CELL RESCUE DEFENSE AN protein binding                         |
| CA4854 | 1.0 | 1.0 | 1.0 | 0.8 | 0.9 | 1.0 | RCE1        | complemer CAAX PRENYL PROTEASE 2 (by orf                    | orf19.3825 | 5825  | CaRCE1     | PROTEIN FATE [folding modification destination] peptidase activity                             |
| CA4855 | 1.1 | 1.1 | 1.0 | 1.1 | 1.0 | 1.0 | IPF5830     | 14894227..unknown function                                  | orf19.3826 | 5830  | IPF5830    | UNCLASSIFIED PROTEINS                                                                          |
| CA4856 | 1.0 | 1.1 | 1.1 | 1.1 | 1.0 | 1.0 | IPF15950    | 14896097..unknown function                                  | orf19.3827 | 15950 | IPF15950   | UNCLASSIFIED PROTEINS molecular_function unknown                                               |
| CA4857 | 1.1 | 1.0 | 0.7 | 0.5 | 0.5 | 0.8 | PHR1        | 14899415..GPI-anchored pH responsive glyco                  | orf19.3829 | 15932 | CaPHR1     | Lipid fatty-acid and isoprenoid metabolism ""CONTROL OF CELLULAR ORGANIZATION SUBCELLULAR      |
| CA4858 | 1.1 | 1.1 | 1.0 | 1.1 | 0.9 | 0.9 | IPF15927.3F | complemer similar to Saccharomyces cerevisi                 | orf19.3831 | 15929 | IPF15927.3 | UNCLASSIFIED PROTEINS RNA binding                                                              |
| CA4859 | 1.0 | 1.0 | 1.0 | 1.1 | 1.1 | 1.1 | IPF15927.5F | complemer similar to Saccharomyces cerevisi                 | orf19.3833 | 15927 | IPF15927.5 | TRANSCRIPTION SUBCELLULAR LOCALISATION transcription regulator activity                        |
| CA4860 | 1.0 | 1.0 | 1.0 | 1.0 | 1.0 | 0.9 | IPF19804    | complemer unknown Function                                  | orf19.3835 | 19804 | IPF19804   | TRANSCRIPTION SUBCELLULAR LOCALISATION                                                         |
| CA4861 | 1.0 | 1.1 | 1.0 | 1.1 | 1.0 | 1.0 | IPF4094     | 14906755..unknown function                                  | orf19.3836 | 4094  | IPF4094    | UNCLASSIFIED PROTEINS molecular_function unknown                                               |
| CA4862 | 1.0 | 0.9 | 1.1 | 0.8 | 1.0 | 1.1 | EFB1        | 14908222..translation elongation factor eEF1                | orf19.3838 | 4091  | CaEFB1     | PROTEIN SYNTHESIS SUBCELLULAR LOCALISATION translation regulator activity                      |
| CA4863 | 0.9 | 1.0 | 1.0 | 1.1 | 1.0 | 1.0 | IPF4089     | complemer secretory aspartyl proteinase                     | orf19.3839 | 4089  | IPF4089    | PROTEIN FATE [folding modification destination] ""SUBCELLULAR LOCALISATION                     |
| CA4864 | 1.0 | 1.0 | 1.1 | 1.0 | 1.0 | 1.0 | IPF4087     | 14912663..similar to Saccharomyces cerevisi                 | orf19.3840 | 4087  | IPF4087    | TRANSCRIPTION protein kinase activity                                                          |
| CA4865 | 1.0 | 1.1 | 1.0 | 0.9 | 1.0 | 1.0 | IPF4085     | 14917806..similar to Saccharomyces cerevisi                 | orf19.3841 | 4085  | IPF4085    | PROTEIN FATE [folding modification destination] ""CELLULAR TRANSP protein kinase activity      |
| CA4866 | 0.9 | 1.0 | 1.0 | 1.0 | 1.0 | 1.1 | IPF4083     | complemer similar to Saccharomyces cerevisi                 | orf19.3843 | 4083  | IPF4083    | PROTEIN FATE [folding modification destination] ""CELLULAR TRANSP transporter activity         |
| CA4867 | 1.1 | 1.0 | 1.0 | 1.0 | 1.0 | 1.0 | IPF4080     | complemer similar to Saccharomyces cerevisi                 | orf19.3844 | 4080  | IPF4080    | PROTEIN SYNTHESIS SUBCELLULAR LOCALISATION structural molecule activity                        |
| CA4868 | 1.1 | 1.0 | 1.0 | 1.0 | 1.1 | 1.0 | IPF4078     | complemer Unknown Function                                  | orf19.3845 | 4078  | IPF4078    | No significant S.c. match                                                                      |
| CA4869 | 1.0 | 1.0 | 1.1 | 1.0 | 1.0 | 1.0 | LYS4        | 14925418..homoaconitate hydratase                           | orf19.3846 | 4077  | CaLYS4     | Amino acid metabolism SUBCELLULAR LOCALISATION lyase activity                                  |
| CA4870 | 1.0 | 0.9 | 1.0 | 1.0 | 1.1 | 1.0 | IPF19568    | 14935736..unknown function                                  | orf19.6556 | 19568 | IPF19568   | No significant S.c. match                                                                      |
| CA4871 | 1.0 | 1.0 | 1.0 | 1.1 | 1.0 | 1.0 | IPF1680     | complemer probable amidase                                  | orf19.6557 | 1680  | IPF1680    | Nitrogen and sulphur metabolism hydrolase activity                                             |
| CA4872 | 1.1 | 1.1 | 1.0 | 1.2 | 0.9 | 1.0 | SEC231      | 14941589..Component of COPII coat (by hom                   | orf19.6558 | 1677  | CaSEC231   | CELLULAR TRANSPORT AND TRANSPORT MECHANISMS SUBCELLULAR LOCALISATION                           |
| CA4873 | 1.0 | 0.9 | 1.0 | 0.9 | 1.0 | 0.9 | IPF1674.3   | complemer putative transcription initiation factor, 3-prime | orf19.6559 | 1675  | IPF1674.3  | No significant S.c. match                                                                      |
| CA4874 | 0.9 | 1.0 | 0.9 | 1.0 | 1.0 | 1.0 | IPF1674     | complemer putative transcription initiation fact            | orf19.6559 | 1674  | IPF1674    | UNCLASSIFIED PROTEINS molecular_function unknown                                               |
| CA4875 | 1.0 | 0.9 | 1.1 | 1.2 | 1.1 | 1.1 | LAT1        | complemer Dihydroliipoamide S-acetyltransfe                 | orf19.6561 | 1673  | CaLAT1     | C-compound and carbohydrate metabolism ENERGY SUBCELLULAR L transferase activity               |
| CA4876 | 0.9 | 0.9 | 1.0 | 1.0 | 0.9 | 1.0 | RNH35       | complemer RNase H (by homology)                             | orf19.6562 | 1669  | CaRNH35    | Nucleotide metabolism RNA binding                                                              |
| CA4877 | 1.0 | 1.0 | 1.0 | 1.0 | 1.0 | 1.1 | IPF1667     | 14950419..unknown function                                  | orf19.6563 | 1667  | IPF1667    | UNCLASSIFIED PROTEINS molecular_function unknown                                               |
| CA4878 | 1.0 | 1.0 | 1.0 | 1.0 | 1.0 | 1.1 | OXA1        | complemer Cytochrome oxidase biogenesis pr                  | orf19.6565 | 1663  | CaOXA1     | ENERGY ""PROTEIN FATE [folding modification destination] ""SUBCELL transporter activity        |
| CA4879 | 1.0 | 1.1 | 1.0 | 1.0 | 0.9 | 0.9 | IPF1660     | 14954636..unknown function                                  | orf19.6566 | 1660  | IPF1660    | UNCLASSIFIED PROTEINS                                                                          |
| CA4880 | 1.0 | 1.1 | 1.1 | 1.0 | 1.0 | 0.9 | RHC18       | complemer Recombination repair protein (by h                | orf19.6568 | 1656  | CaRHC18    | CELL CYCLE AND DNA PROCESSING molecular_function unknown                                       |
| CA4881 | 1.0 | 1.0 | 1.0 | 1.1 | 1.0 | 0.9 | IPF1652     | 14960328..putative purine nucleoside permea                 | orf19.6569 | 1652  | IPF1652    | No significant S.c. match                                                                      |
| CA4882 | 0.9 | 0.9 | 1.0 | 1.0 | 1.0 | 0.9 | IPF1651     | 14962314..purine nucleoside permease (by h                  | orf19.6570 | 1651  | IPF1651    | No significant S.c. match                                                                      |

|        |     |     |     |     |     |     |           |                                                        |             |                                   |                                                                                        |                                                    |                                     |
|--------|-----|-----|-----|-----|-----|-----|-----------|--------------------------------------------------------|-------------|-----------------------------------|----------------------------------------------------------------------------------------|----------------------------------------------------|-------------------------------------|
| CA4883 | 1.0 | 1.0 | 1.0 | 1.1 | 1.1 | 1.2 | IPF1649   | complemer similar to Saccharomyces cerevisi            | orf19.6573  | 1649 IPF1649                      | CELL CYCLE AND DNA PROCESSING CELL FATE SUBCELLULAR LC                                 | signal transducer activity                         |                                     |
| CA4884 | 0.9 | 1.0 | 1.1 | 1.0 | 1.0 | 1.0 | ALK6      | complemer n-alkane inducible cytochrome P-4orf19.6574  | 1640 CaALK6 | CELL RESCUE DEFENSE AND VIRULENCE | ""CELL FATE CONTROL OF CELLULAR ORGANIZATION                                           |                                                    |                                     |
| CA4885 | 1.0 | 1.0 | 0.9 | 1.0 | 0.9 | 1.0 | IPF1636   | complemer similar to Saccharomyces cerevisi            | orf19.6577  | 1636 IPF1636                      | CELL RESCUE DEFENSE AND VIRULENCE                                                      | ""TRANSPORT FACILITA                               | transporter activity                |
| CA4886 | 1.1 | 1.2 | 0.9 | 0.9 | 0.9 | 0.9 | IPF1634   | complemer unknown function                             | orf19.6578  | 1634 IPF1634                      | Phosphate metabolism CELLULAR TRANSPORT AND TRANSPORT MECHANISMS REGULATION OF/IN      |                                                    |                                     |
| CA4887 | 1.0 | 1.0 | 0.9 | 0.9 | 0.9 | 0.9 | IPF1632   | complemer unknown function                             | orf19.6579  | 1632 IPF1632                      | No significant S.c. match                                                              |                                                    |                                     |
| CA4888 | 1.0 | 1.0 | 1.0 | 1.0 | 1.0 | 1.0 | IPF1631   | complemer unknown function                             | orf19.6580  | 1631 IPF1631                      | No significant S.c. match                                                              |                                                    |                                     |
| CA4889 | 1.0 | 1.0 | 1.0 | 1.0 | 1.0 | 1.0 | IPF1629   | complemer unknown function                             | orf19.6581  | 1629 IPF1629                      | UNCLASSIFIED PROTEINS                                                                  |                                                    | molecular_function unknown          |
| CA4890 | 0.9 | 0.9 | 0.9 | 0.9 | 0.9 | 0.9 | PRE10     | 14990263..20S proteasome subunit C1 (by hc             | orf19.6582  | 1628 CaPRE10                      | PROTEIN FATE [folding modification destination]                                        | ""SUBCELLULAR LOC                                  | peptidase activity                  |
| CA4891 | 1.0 | 1.0 | 1.0 | 1.0 | 1.0 | 0.8 | IPF1627   | 14991363..unknown function                             | orf19.6583  | 1627 IPF1627                      | CELLULAR TRANSPORT AND TRANSPORT MECHANISMS SUBCELLULAR LOCALISATION                   |                                                    |                                     |
| CA4892 | 1.0 | 1.1 | 1.0 | 1.0 | 1.0 | 1.0 | PRT1      | 14994841.. Translation initiation factor eIF3 (b       | orf19.6584  | 1623 CaPRT1                       | CELL CYCLE AND DNA PROCESSING PROTEIN SYNTHESIS CELL F                                 | translation regulator activity                     |                                     |
| CA4893 | 1.1 | 1.1 | 1.0 | 1.0 | 1.0 | 0.9 | IPF1621   | complemer unknown function                             | orf19.6585  | 1621 IPF1621                      | UNCLASSIFIED PROTEINS                                                                  |                                                    | molecular_function unknown          |
| CA4894 | 1.1 | 1.2 | 1.0 | 1.0 | 1.2 | 1.1 | IPF1617   | 15003438..unknown function                             | orf19.6586  | 1617 IPF1617                      | No significant S.c. match                                                              |                                                    |                                     |
| CA4895 | 1.0 | 1.0 | 1.1 | 1.1 | 1.1 | 1.1 | IPF18161  | complemer unknown function                             | orf19.6587  | 18161 IPF18161                    | UNCLASSIFIED PROTEINS                                                                  |                                                    | molecular_function unknown          |
| CA4896 | 1.0 | 1.0 | 1.1 | 1.0 | 0.9 | 0.9 | IPF18160  | 15009072..unknown function                             | orf19.6588  | 18160 IPF18160                    | PROTEIN FATE [folding modification destination]                                        |                                                    | molecular_function unknown          |
| CA4897 | 0.9 | 1.2 | 1.1 | 1.1 | 1.0 | 0.9 | TUB2.3    | 15014118..Beta-tubulin, 3-prime end                    | orf19.6034  | 1463 CaTUB2.3                     | CELL CYCLE AND DNA PROCESSING SUBCELLULAR LOCALISATIO                                  | structural molecule activity                       |                                     |
| CA4898 | 0.9 | 0.9 | 1.0 | 0.9 | 1.0 | 0.9 | IPF1461   | complemer putative NADH dehydrogenase (u               | orf19.6035  | 1461 IPF1461                      | No significant S.c. match                                                              |                                                    |                                     |
| CA4899 | 1.0 | 0.9 | 1.0 | 0.9 | 1.0 | 1.0 | IPF1460   | complemer unknown function                             | orf19.6036  | 1460 IPF1460                      | TRANSCRIPTION                                                                          |                                                    | enzyme regulator activity           |
| CA4900 | 0.9 | 1.0 | 1.0 | 1.0 | 0.9 | 0.9 | IPF2      | complemer unknown function                             | orf19.6037  | 1459 CaIPF2                       | No significant S.c. match                                                              |                                                    |                                     |
| CA4901 | 1.1 | 1.0 | 1.0 | 1.1 | 1.0 | 1.0 | IPF1457   | 15023409..putative transcription activator (by         | orf19.6038  | 1457 IPF1457                      | Nitrogen and sulphur metabolism                                                        | TRANSCRIPTION SUBCELLULAR LOCALISATION             |                                     |
| CA4902 | 1.1 | 1.0 | 1.1 | 1.0 | 1.0 | 1.0 | SED5      | 15025486..Syntxin (by homology)                        | orf19.6039  | 1455 CaSED5                       | CELLULAR TRANSPORT AND TRANSPORT MECHANISMS SUBCELL                                    | transporter activity                               |                                     |
| CA4903 | 0.9 | 1.0 | 0.9 | 1.0 | 1.0 | 1.0 | SNF7      | 15027036..Class E Vps protein (by homology             | orf19.6040  | 1454 CaSNF7                       | C-compound and carbohydrate metabolism                                                 | ""PROTEIN FATE [folding m                          | molecular_function unknown          |
| CA4904 | 1.1 | 1.0 | 1.0 | 1.2 | 1.1 | 1.1 | RPO41     | 15028260..Mitochondrial DNA-directed RNA               | orf19.6041  | 1453 CaRPO41                      | CELL CYCLE AND DNA PROCESSING TRANSCRIPTION SUBCELLUL                                  | nucleotidyltransferase activity                    |                                     |
| CA4905 | 0.9 | 1.0 | 0.9 | 1.0 | 1.0 | 1.0 | DLD1      | complemer D-lactate ferricytochrome C oxid             | orf19.6043  | 1451 CaDLD1                       | C-compound and carbohydrate metabolism ENERGY SUBCELLULAR LOCALISATION                 |                                                    |                                     |
| CA4906 | 1.0 | 1.0 | 1.0 | 1.0 | 0.9 | 1.0 | MOB2      | complemer Required for maintenance in ploidy           | orf19.6044  | 1449 CaMOB2                       | No significant S.c. match                                                              |                                                    | structural molecule activity        |
| CA4907 | 1.0 | 1.0 | 1.0 | 1.0 | 1.0 | 1.0 | PSD1      | complemer Phosphatidylserine decarboxylase             | orf19.6045  | 1448 CaPSD1                       | Lipid fatty-acid and isoprenoid metabolism                                             | ""SUBCELLULAR LOCALISA                             | lyase activity                      |
| CA4908 | 0.9 | 1.0 | 1.0 | 1.0 | 1.0 | 1.0 | IPF1445   | complemer similar to Saccharomyces cerevisi            | orf19.6046  | 1445 IPF1445                      | CELL CYCLE AND DNA PROCESSING                                                          | ""PROTEIN FATE [folding modifi                     | protein binding                     |
| CA4909 | 1.0 | 1.1 | 1.1 | 0.9 | 0.9 | 0.9 | TUF1      | complemer Translation elongation factor TU             | orf19.6047  | 1439 CaTUF1                       | PROTEIN SYNTHESIS SUBCELLULAR LOCALISATION                                             |                                                    | translation regulator activity      |
| CA4910 | 1.0 | 1.0 | 1.1 | 0.9 | 1.1 | 0.9 | IPF1437   | complemer unknown function                             | orf19.6048  | 1437 IPF1437                      | C-compound and carbohydrate metabolism                                                 | ""PROTEIN FATE [folding modification destination]" | ""SUBCELL                           |
| CA4911 | 1.0 | 1.0 | 1.0 | 0.9 | 1.0 | 0.9 | IPF1435   | 15045593..unknown function                             | orf19.6049  | 1435 IPF1435                      | CELL CYCLE AND DNA PROCESSING                                                          |                                                    | enzyme regulator activity           |
| CA4912 | 1.1 | 1.1 | 1.0 | 1.0 | 1.1 | 1.0 | CNS1      | complemer Cyclophilin Seven Suppressor (by             | orf19.6052  | 1432 CaCNS1                       | UNCLASSIFIED PROTEINS                                                                  |                                                    | chaperone activity                  |
| CA4913 | 0.9 | 1.0 | 1.0 | 0.9 | 1.0 | 1.1 | CIS2      | complemer Gamma-glutamyltransferase (by h              | orf19.6053  | 1431 CaCIS2                       | Amino acid metabolism                                                                  | CELL CYCLE AND DNA PROCESSING CONT                 | transferase activity                |
| CA4914 | 1.0 | 1.0 | 1.0 | 1.0 | 1.1 | 1.0 | IPF1428   | 15052039..Similar to ubiquitination protein Bu         | orf19.6054  | 1428 IPF1428                      | PROTEIN FATE [folding modification destination]                                        |                                                    |                                     |
| CA4915 | 1.0 | 1.0 | 1.0 | 0.9 | 1.0 | 1.0 | IPF1427   | 15054729..Similar to ubiquitination protein Bu         | orf19.6055  | 1427 IPF1427                      | PROTEIN FATE [folding modification destination]                                        |                                                    |                                     |
| CA4916 | 1.0 | 1.0 | 1.0 | 1.0 | 1.0 | 1.0 | IPF1425   | complemer Hypothetical phosphoglycerate mu             | orf19.6056  | 1425 IPF1425                      | C-compound and carbohydrate metabolism ENERGY                                          |                                                    | molecular_function unknown          |
| CA4917 | 1.0 | 1.0 | 1.0 | 1.0 | 1.0 | 1.0 | ECM31     | complemer Involved in cell wall biogenesis an          | orf19.6057  | 1424 CaECM31                      | Metabolism of vitamins cofactors and prosthetic groups                                 | ""CONTROL OF                                       | transferase activity                |
| CA4918 | 1.0 | 1.0 | 1.1 | 1.1 | 1.0 | 1.1 | GLO1      | 15059618..Glyoxalase I (by homology)                   | orf19.6058  | 1422 CaGLO1                       | Amino acid metabolism                                                                  |                                                    | lyase activity                      |
| CA4919 | 1.0 | 1.0 | 1.1 | 1.1 | 1.0 | 1.0 | TTR1      | 15060920..Glutaredoxin (by homology)                   | orf19.6059  | 1421 CaTTR1                       | Nucleotide metabolism                                                                  | ""CELL RESCUE DEFENSE AND VIRULENCE                | transferase activity,oxidoreductase |
| CA4920 | 1.0 | 0.9 | 1.0 | 1.0 | 1.0 | 1.0 | GCN20     | 15061459..Positive effector of Gcn2p (by hom           | orf19.6060  | 1420 CaGCN20                      | PROTEIN SYNTHESIS SUBCELLULAR LOCALISATION TRANSPORT                                   |                                                    | molecular_function unknown          |
| CA4921 | 0.9 | 1.0 | 1.0 | 0.9 | 0.9 | 1.0 | IPF1416   | 15063906..unknown function                             | orf19.6061  | 1416 IPF1416                      | UNCLASSIFIED PROTEINS                                                                  |                                                    | molecular_function unknown          |
| CA4922 | 1.0 | 1.0 | 1.0 | 1.0 | 0.9 | 0.9 | IPF1415   | complemer unknown function                             | orf19.6062  | 1415 IPF1415                      | UNCLASSIFIED PROTEINS                                                                  |                                                    | molecular_function unknown          |
| CA4923 | 1.0 | 1.0 | 0.9 | 1.0 | 1.0 | 0.9 | IPF1413.3 | 15066196..unknown function, 3-prime end                |             | 1413 IPF1413.3                    | CLASSIFICATION NOT YET CLEAR-CUT                                                       |                                                    | molecular_function unknown          |
| CA4924 | 1.0 | 1.0 | 1.0 | 1.0 | 1.1 | 0.9 | UBP6.3    | complemer Ubiquitin-specific protease, 3-prim          | orf19.6063  | 1412 CaUBP6.3                     | PROTEIN FATE [folding modification destination]                                        |                                                    | peptidase activity                  |
| CA4925 | 1.1 | 1.0 | 1.0 | 0.9 | 1.0 | 1.1 | IPF1408   | complemer unknown function                             | orf19.6064  | 1408 IPF1408                      | UNCLASSIFIED PROTEINS                                                                  |                                                    | molecular_function unknown          |
| CA4926 | 1.1 | 1.0 | 1.0 | 1.0 | 0.9 | 1.0 | IPF1404   | complemer unknown function                             | orf19.6065  | 1404 IPF1404                      | C-compound and carbohydrate metabolism ENERGY TRANSCRIPTION CELL FATE SUBCELLULAR LOC. |                                                    |                                     |
| CA4927 | 1.1 | 1.0 | 1.0 | 1.1 | 1.0 | 1.0 | IPF1401   | 15072963..similarity to aldehyde dehydrogen            | orf19.6066  | 1401 IPF1401                      | CLASSIFICATION NOT YET CLEAR-CUT                                                       |                                                    | molecular_function unknown          |
| CA4928 | 1.0 | 1.0 | 1.0 | 1.1 | 1.1 | 1.1 | IPF1399   | complemer unknown function                             | orf19.6068  | 1399 IPF1399                      | UNCLASSIFIED PROTEINS                                                                  |                                                    | molecular_function unknown          |
| CA4929 | 1.3 | 1.7 | 1.0 | 1.0 | 1.1 | 1.0 | ENA22     | complemer P-type ATPase involved in Na+ eff            | orf19.6070  | 1398 CaENA22                      | REGULATION OF/INTERACTION WITH CELLULAR ENVIRONMENT                                    | Tr                                                 | transporter activity                |
| CA4930 | 1.1 | 1.0 | 1.1 | 1.0 | 1.1 | 1.0 | IPF8381   | 15082213..similar to Saccharomyces cerevisi            | orf19.6071  | 8381 IPF8381                      | CELL CYCLE AND DNA PROCESSING SUBCELLULAR LOCALISATIO                                  | transferase activity                               |                                     |
| CA4931 | 1.0 | 1.0 | 1.0 | 1.0 | 1.0 | 1.0 | IPF8378   | complemer unknown function                             | orf19.6072  | 8378 IPF8378                      | No significant S.c. match                                                              |                                                    |                                     |
| CA4932 | 1.2 | 1.0 | 1.1 | 0.9 | 1.0 | 1.2 | IPF8374   | 15087606..unknown function                             | orf19.6073  | 8374 IPF8374                      | Metabolism of vitamins cofactors and prosthetic groups                                 |                                                    | oxidoreductase activity             |
| CA4933 | 0.9 | 1.0 | 1.0 | 1.0 | 1.0 | 0.9 | IPF8372   | complemer unknown function                             | orf19.6074  | 8372 IPF8372                      | UNCLASSIFIED PROTEINS                                                                  |                                                    | molecular_function unknown          |
| CA4934 | 1.0 | 1.0 | 0.9 | 1.0 | 1.1 | 1.0 | CDC36     | 15089444..transcription factor (by homology)           | orf19.6075  | 8371 CaCDC36                      | CELL CYCLE AND DNA PROCESSING TRANSCRIPTION SUBCELLUL                                  | RNA binding                                        |                                     |
| CA4935 | 1.0 | 1.0 | 1.0 | 1.0 | 1.1 | 1.0 | VPS29     | complemer vacuolar protein sorting protein (by         | orf19.6076  | 8370 CaVPS29                      | PROTEIN FATE [folding modification destination]                                        | ""CELLULAR TRANSP                                  | molecular_function unknown          |
| CA4936 | 1.0 | 1.0 | 1.0 | 1.0 | 1.1 | 1.3 | IPF8369   | complemer unknown function                             | orf19.1349  | 8369 IPF8369                      | UNCLASSIFIED PROTEINS                                                                  |                                                    | molecular_function unknown          |
| CA4937 | 0.9 | 0.9 | 1.0 | 1.0 | 1.0 | 1.0 | TFP3      | complemer H+-ATPase by homology                        | orf19.6538  | 5167 CaTFP3                       | PROTEIN FATE [folding modification destination]                                        | ""CELLULAR TRANSP                                  | transporter activity                |
| CA4938 | 0.9 | 0.9 | 1.0 | 1.0 | 0.9 | 1.0 | IPF5166   | 15094986..unknown function                             | orf19.6537  | 5166 IPF5166                      | UNCLASSIFIED PROTEINS                                                                  |                                                    | molecular_function unknown          |
| CA4939 | 1.1 | 0.9 | 1.0 | 0.9 | 1.0 | 1.2 | IQG1      | 15096398..RAS GTPase-activating-like protei            | orf19.6536  | 5165 CaIQG1                       | CELL CYCLE AND DNA PROCESSING CELL FATE SUBCELLULAR LC                                 | protein binding                                    |                                     |
| CA4940 | 1.0 | 0.9 | 1.1 | 1.0 | 1.1 | 1.1 | CRN1.3F   | complemer actin-binding protein, 3-prime end           | orf19.6535  | 5163 CaCRN1.3                     | No significant S.c. match                                                              |                                                    |                                     |
| CA4941 | 0.9 | 1.0 | 1.1 | 1.0 | 1.0 | 1.0 | CRN1.53F  | complemer actin-binding protein, 5-prime end           | (by homolo  | 5160 CaCRN1.5                     | SUBCELLULAR LOCALISATION                                                               |                                                    | protein binding                     |
| CA4943 | 1.0 | 1.0 | 1.0 | 0.9 | 1.0 | 0.9 | IPF5158   | complemer unknown function                             | orf19.6534  | 5158 IPF5158                      | No significant S.c. match                                                              |                                                    |                                     |
| CA4944 | 1.0 | 1.1 | 1.1 | 1.0 | 0.9 | 0.8 | MSK1      | 15104388..lysyl-tRNA synthetase by homolog             | orf19.6533  | 5156 CaMSK1                       | PROTEIN SYNTHESIS SUBCELLULAR LOCALISATION                                             |                                                    | ligase activity                     |
| CA4945 | 1.0 | 1.1 | 1.0 | 1.0 | 1.0 | 1.0 | FLX1      | complemer MITOCHONDRIAL FAD CARRIER                    | orf19.6532  | 5154 CaFLX1                       | Metabolism of vitamins cofactors and prosthetic groups                                 | ""CELLULAR TR                                      | transporter activity                |
| CA4946 | 1.1 | 0.9 | 0.9 | 1.0 | 1.0 | 1.0 | TOM71     | complemer Translocase of the outer mitochondrial membr |             | 5151 CaTOM71                      | PROTEIN FATE [folding modification destination]                                        | ""CELLULAR TRANSP                                  | transporter activity                |
| CA4947 | 1.0 | 1.0 | 1.0 | 1.0 | 1.0 | 0.7 | NUC2      | 15108686..NADH-UBIQUINONE OXIDORED                     | orf19.6531  | 5150 CaNUC2                       | No significant S.c. match                                                              |                                                    |                                     |
| CA4948 | 1.0 | 1.1 | 1.0 | 1.0 | 1.0 | 1.0 | IPF5149   | complemer unknown function                             | orf19.6530  | 5149 IPF5149                      | PROTEIN FATE [folding modification destination]                                        | ""CELLULAR TRANSPORT AND TRANSPORT MECHAN          |                                     |
| CA4949 | 1.1 | 1.0 | 1.0 | 1.0 | 1.0 | 1.0 | CDC34     | 15113037..Ubiquitin-conjugating enzyme (by             | orf19.6529  | 5145 CaCDC34                      | Amino acid metabolism                                                                  | C-compound and carbohydrate metabolism CEL         | ligase activity                     |
| CA4950 | 1.1 | 1.0 | 0.9 | 0.9 | 0.9 | 1.0 | IPF5143   | complemer Unknown function                             | orf19.6528  | 5143 IPF5143                      | No significant S.c. match                                                              |                                                    |                                     |
| CA4951 | 0.8 | 0.9 | 0.8 | 1.0 | 1.1 | 1.0 | IPF13607  | complemer unknown function                             | orf19.6527  | 13607 IPF13607                    | UNCLASSIFIED PROTEINS                                                                  |                                                    | molecular_function unknown          |
| CA4952 | 1.0 | 1.0 | 0.9 | 1.1 | 1.1 | 1.0 | IPF13609  | 15120425..unknown function                             | orf19.6526  | 13609 IPF13609                    | UNCLASSIFIED PROTEINS                                                                  |                                                    | molecular_function unknown          |
| CA4953 | 1.0 | 1.0 | 1.0 | 1.0 | 1.0 | 1.0 | IPF4567.3 | 15121764..unknown function, 3-prime end                | orf19.6525  | 4567 IPF4567.3                    | No significant S.c. match                                                              |                                                    |                                     |
| CA4954 | 1.2 | 1.1 | 1.1 | 1.0 | 1.1 | 1.1 | TOM40     | complemer mitochondrial import receptor chai           | orf19.6524  | 4568 CaTOM40                      | PROTEIN FATE [folding modification destination]                                        | ""CELLULAR TRANSP                                  | transporter activity                |
| CA4955 | 0.9 | 1.0 | 1.1 | 1.0 | 1.0 | 1.1 | IPF4580   | complemer putative allantoin permease (by h            | orf19.6522  | 4580 IPF4580                      | TRANSPORT FACILITATION                                                                 |                                                    |                                     |

|        |     |     |     |     |     |     |            |                                                                    |                |                                                                                                         |                                      |
|--------|-----|-----|-----|-----|-----|-----|------------|--------------------------------------------------------------------|----------------|---------------------------------------------------------------------------------------------------------|--------------------------------------|
| CA4956 | 1.0 | 1.0 | 1.1 | 0.9 | 0.9 | 1.0 | IPF4583    | complemer putative allantoin permease (by homology) orf19.6520     | 4583 IPF4583   | TRANSPORT FACILITATION                                                                                  | transporter activity                 |
| CA4957 | 1.0 | 1.0 | 1.1 | 1.0 | 0.9 | 1.0 | IPF4588    | complemer putative aldehyde dehydrogenase orf19.6518               | 4588 IPF4588   | CLASSIFICATION NOT YET CLEAR-CUT                                                                        |                                      |
| CA4958 | 1.0 | 1.1 | 1.0 | 1.0 | 1.1 | 0.9 | RAD14      | 15140020..nucleotide excision repair protein (orf19.6517           | 4591 CaRAD14   | CELL CYCLE AND DNA PROCESSING SUBCELLULAR LOCALISATION                                                  | DNA binding                          |
| CA4959 | 1.0 | 1.2 | 0.8 | 0.5 | 0.7 | 0.6 | HSP90      | 15141513..heat shock protein heat shock orf19.6515                 | 4596 CaHSP90   | CELL RESCUE DEFENSE AND VIRULENCE ""SUBCELLULAR LOCAL                                                   | chaperone activity                   |
| CA4960 | 1.0 | 0.7 | 1.0 | 0.9 | 1.0 | 1.1 | IPF3912    | complemer unknown function orf19.6514                              | 3912 IPF3912   | TRANSCRIPTION REGULATION OF/INTERACTION WITH CELLULAR                                                   | transcription regulator activity     |
| CA4961 | 1.0 | 1.1 | 1.1 | 1.0 | 1.0 | 1.0 | IPF3916    | complemer similar to Saccharomyces cerevisiae orf19.6512           | 3916 IPF3916   | CELLULAR TRANSPORT AND TRANSPORT MECHANISMS SUBCELL                                                     | protein binding                      |
| CA4962 | 1.0 | 1.0 | 1.0 | 0.9 | 0.9 | 1.0 | TRL1       | 15160208..tRNA ligase transfer RN orf19.6511                       | 3918 CaTRL1    | TRANSCRIPTION SUBCELLULAR LOCALISATION                                                                  | ligase activity                      |
| CA4963 | 0.9 | 1.1 | 1.0 | 1.0 | 0.9 | 1.0 | IPF3919    | 15162982..unknown function orf19.6510                              | 3919 IPF3919   | CELL RESCUE DEFENSE AND VIRULENCE                                                                       |                                      |
| CA4964 | 1.0 | 1.0 | 1.0 | 0.9 | 1.0 | 1.0 | IPF3920    | 15163666..unknown function orf19.6509                              | 3920 IPF3920   | Nucleotide metabolism ""CELL RESCUE DEFENSE AND VIRULENCE ""SUBCELLULAR LOCALISATION                    |                                      |
| CA4965 | 1.0 | 1.1 | 1.0 | 1.0 | 1.0 | 1.0 | IPF3921    | complemer unknown function orf19.6508                              | 3921 IPF3921   | CELLULAR TRANSPORT AND TRANSPORT MECHANISMS                                                             | transporter activity                 |
| CA4966 | 1.1 | 1.1 | 1.1 | 1.2 | 1.1 | 1.1 | IPF3923    | 15165775..unknown function orf19.6507                              | 3923 IPF3923   | PROTEIN SYNTHESIS ""PROTEIN FATE [folding modification destination] ""SUBCELLULAR LOCALISATION          |                                      |
| CA4967 | 1.0 | 1.0 | 1.0 | 1.1 | 1.0 | 1.1 | IPF3927    | 15167052..unknown function orf19.6506                              | 3927 IPF3927   | UNCLASSIFIED PROTEINS                                                                                   | molecular_function unknown           |
| CA4968 | 1.0 | 1.0 | 0.9 | 1.0 | 1.0 | 1.1 | IPF3928    | complemer unknown function orf19.6503                              | 3928 IPF3928   | No significant S.c. match                                                                               |                                      |
| CA4969 | 0.9 | 1.0 | 1.0 | 1.0 | 0.9 | 0.9 | IPF3930    | 15170109..unknown function orf19.6502                              | 3930 IPF3930   | CELL CYCLE AND DNA PROCESSING UNCLASSIFIED PROTEINS                                                     | molecular_function unknown           |
| CA4970 | 1.0 | 1.0 | 1.0 | 0.9 | 1.0 | 1.0 | IPF4696    | 15175492..unknown function orf19.5282                              | 4696 IPF4696   | UNCLASSIFIED PROTEINS                                                                                   |                                      |
| CA4971 | 1.0 | 1.0 | 1.1 | 1.1 | 1.1 | 1.2 | IPF4697    | 15177526..similar to Saccharomyces cerevisiae orf19.5281           | 4697 IPF4697   | CELL CYCLE AND DNA PROCESSING SUBCELLULAR LOCALISATION                                                  | RNA binding                          |
| CA4972 | 0.9 | 1.1 | 1.0 | 0.9 | 1.0 | 1.0 | MUP1       | 15182420..High affinity methionine permease orf19.5280             | 4701 CaMUP1    | Amino acid metabolism CELLULAR TRANSPORT AND TRANSPORT                                                  | transporter activity                 |
| CA4973 | 1.0 | 1.0 | 0.9 | 1.0 | 0.9 | 1.0 | IPF4703    | 15184424..unknown function orf19.5279                              | 4703 IPF4703   | UNCLASSIFIED PROTEINS                                                                                   | structural molecule activity         |
| CA4974 | 0.9 | 1.1 | 1.0 | 1.0 | 1.0 | 1.0 | IPF4704    | 15185345..unknown function orf19.5278                              | 4704 IPF4704   | UNCLASSIFIED PROTEINS                                                                                   | molecular_function unknown           |
| CA4975 | 1.0 | 1.1 | 1.0 | 1.0 | 1.0 | 1.0 | IPF4706    | complemer unknown function orf19.5277                              | 4706 IPF4706   | Nucleotide metabolism PROTEIN SYNTHESIS SUBCELLULAR LOCAL                                               | molecular_function unknown           |
| CA4976 | 0.9 | 0.9 | 1.1 | 1.0 | 1.0 | 0.9 | IPF4708    | 15188026..unknown function orf19.5276                              | 4708 IPF4708   | UNCLASSIFIED PROTEINS                                                                                   | protein binding                      |
| CA4977 | 1.0 | 0.9 | 1.0 | 1.0 | 1.0 | 1.0 | IPF4710    | 15189601..unknown function orf19.5275                              | 4710 IPF4710   | UNCLASSIFIED PROTEINS                                                                                   | molecular_function unknown           |
| CA4978 | 0.9 | 0.9 | 1.0 | 1.0 | 0.9 | 1.0 | IPF2065    | 15193003..unknown function orf19.5274                              | 2065 IPF2065   | UNCLASSIFIED PROTEINS                                                                                   | molecular_function unknown           |
| CA4979 | 1.0 | 1.1 | 1.0 | 1.1 | 1.0 | 1.0 | IPF2062    | complemer unknown function orf19.5271                              | 2062 IPF2062   | Nucleotide metabolism CELL CYCLE AND DNA PROCESSING CELLULAR COMMUNICATION/SIGNAL T                     |                                      |
| CA4980 | 0.9 | 0.9 | 1.1 | 1.1 | 1.0 | 1.0 | IPF2059    | 15199221..unknown function orf19.5270                              | 2059 IPF2059   | UNCLASSIFIED PROTEINS                                                                                   |                                      |
| CA4981 | 1.0 | 1.0 | 1.0 | 1.0 | 1.0 | 0.9 | IPF2057    | complemer unknown function orf19.5269                              | 2057 IPF2057   | No significant S.c. match                                                                               |                                      |
| CA4982 | 1.0 | 1.1 | 1.0 | 1.0 | 1.1 | 1.0 | NUT2       | 15203161..Negative transcription regulator fr orf19.5268           | 2054 CaNUT2    | TRANSCRIPTION SUBCELLULAR LOCALISATION                                                                  | transcription regulator activity     |
| CA4983 | 1.0 | 1.1 | 1.0 | 0.9 | 0.9 | 0.9 | IPF2053    | 15206221..unknown function orf19.5267                              | 2053 IPF2053   | No significant S.c. match                                                                               |                                      |
| CA4984 | 1.0 | 1.0 | 1.0 | 1.0 | 1.0 | 1.0 | IPF2052    | complemer unknown function orf19.5266                              | 2052 IPF2052   | No significant S.c. match                                                                               |                                      |
| CA4985 | 1.0 | 0.7 | 0.9 | 1.0 | 1.1 | 1.0 | IPF2050    | complemer similar to Saccharomyces cerevisiae orf19.5265           | 2050 IPF2050   | CELL CYCLE AND DNA PROCESSING CELLULAR TRANSPORT AND                                                    | motor activity,structural molecule a |
| CA4986 | 1.0 | 1.0 | 1.0 | 1.0 | 1.0 | 1.0 | SER33      | 15215166..Phosphoglycerate dehydrogenase orf19.5263                | 2046 CaSER33   | Amino acid metabolism                                                                                   | oxidoreductase activity              |
| CA4987 | 1.1 | 1.0 | 1.0 | 1.0 | 1.0 | 1.0 | IPF2045    | 15216737..unknown function orf19.5262                              | 2045 IPF2045   | No significant S.c. match                                                                               |                                      |
| CA4988 | 1.0 | 1.0 | 1.0 | 1.1 | 0.9 | 1.1 | RPN2       | 15217609..Proteasome regulatory subunit (by homology) orf19.5260   | 2043 CaRPN2    | TRANSCRIPTION ""PROTEIN FATE [folding modification destination] ""peptidase activity,signal transduce   |                                      |
| CA4989 | 1.0 | 1.1 | 1.1 | 1.1 | 1.0 | 1.0 | IPF2041    | complemer unknown function orf19.5259                              | 2041 IPF2041   | No significant S.c. match                                                                               |                                      |
| CA4990 | 0.9 | 1.0 | 1.0 | 1.0 | 0.9 | 1.0 | IPF2039    | complemer unknown function orf19.5258                              | 2039 IPF2039   | No significant S.c. match                                                                               |                                      |
| CA4991 | 1.1 | 1.1 | 1.0 | 1.1 | 0.9 | 0.9 | LCB4       | 15224113..Sphingolipid long chain base kinase orf19.5257           | 2037 CaLCB4    | Lipid fatty-acid and isoprenoid metabolism                                                              |                                      |
| CA4992 | 1.0 | 1.0 | 1.1 | 0.8 | 1.0 | 0.9 | IPF2036    | complemer unknown function orf19.5256                              | 2036 IPF2036   | CELLULAR TRANSPORT AND TRANSPORT MECHANISMS SUBCELLULAR LOCALISATION                                    |                                      |
| CA4993 | 1.1 | 1.1 | 0.9 | 0.9 | 0.9 | 1.0 | PXA2       | complemer ABC transporter, peroxisomal (by homology) orf19.5255    | 2034 CaPXA2    | Lipid fatty-acid and isoprenoid metabolism ""CELLULAR TRANSPORT A transporter activity,hydrolase activi |                                      |
| CA4994 | 1.0 | 1.0 | 1.0 | 0.9 | 1.0 | 0.9 | IPF2033    | complemer unknown function orf19.5254                              | 2033 IPF2033   | No significant S.c. match                                                                               |                                      |
| CA4995 | 1.1 | 1.0 | 0.9 | 0.9 | 1.1 | 0.9 | YAK1       | 15230847..Ser/thr protein kinase (by homology) orf19.5253          | 2032 CaYAK1    | CELL CYCLE AND DNA PROCESSING SUBCELLULAR LOCALISATION                                                  |                                      |
| CA4996 | 1.0 | 1.0 | 1.1 | 0.9 | 1.0 | 0.8 | IPF2029    | complemer unknown function orf19.5251                              | 2029 IPF2029   | TRANSCRIPTION ""CELL RESCUE DEFENSE AND VIRULENCE ""SUBCELLULAR LOCALISATION                            |                                      |
| CA4997 | 1.0 | 0.9 | 1.0 | 0.9 | 0.9 | 0.9 | IPF2027    | 15235858..unknown function orf19.5250                              | 2027 IPF2027   | No significant S.c. match                                                                               |                                      |
| CA4998 | 1.0 | 1.0 | 1.0 | 1.0 | 1.0 | 0.9 | IPF2026    | complemer unknown function orf19.5249                              | 2026 IPF2026   | No significant S.c. match                                                                               |                                      |
| CA4999 | 1.1 | 1.0 | 1.0 | 1.0 | 1.0 | 1.0 | IPF2024    | 15237770..unknown function orf19.5248                              | 2024 IPF2024   | CELLULAR TRANSPORT AND TRANSPORT MECHANISMS SUBCELL                                                     | molecular_function unknown           |
| CA5000 | 1.0 | 1.0 | 1.0 | 1.1 | 1.0 | 0.8 | IPF2023    | complemer unknown function orf19.5247                              | 2023 IPF2023   | UNCLASSIFIED PROTEINS                                                                                   | molecular_function unknown           |
| CA5001 | 1.0 | 1.0 | 1.0 | 0.9 | 0.9 | 1.0 | IPF2022    | complemer unknown function orf19.5246                              | 2022 IPF2022   | No significant S.c. match                                                                               |                                      |
| CA5002 | 0.9 | 1.0 | 1.0 | 1.0 | 1.0 | 0.9 | IPF2021    | 15241490..unknown function orf19.5245                              | 2021 IPF2021   | PROTEIN FATE [folding modification destination]                                                         |                                      |
| CA5003 | 0.9 | 1.0 | 1.0 | 0.9 | 0.9 | 0.9 | MCD4       | 15243972..Sporulation protein (by homology) orf19.5244             | 2019 CaMCD4    | CELL FATE UNCLASSIFIED PROTEINS                                                                         | molecular_function unknown           |
| CA5004 | 1.1 | 1.1 | 0.9 | 1.1 | 1.0 | 1.0 | TRP3       | 15247113..Anthranilate synthase / indole glyc orf19.5243           | 2018 CaTRP3    | Amino acid metabolism SUBCELLULAR LOCALISATION                                                          | lyase activity                       |
| CA5005 | 0.9 | 0.9 | 1.0 | 0.9 | 0.9 | 1.0 | CDC62      | 15249204..Cell division control protein (by homology) orf19.5241   | 18149 CaCDC62  | No significant S.c. match                                                                               |                                      |
| CA5006 | 1.0 | 1.0 | 1.0 | 1.0 | 1.1 | 1.1 | IPF12584   | 15251820..unknown function orf19.5241                              | 12584 IPF12584 | UNCLASSIFIED PROTEINS                                                                                   | hydrolase activity                   |
| CA5007 | 1.0 | 1.0 | 0.9 | 1.0 | 1.0 | 0.9 | IPF12579   | complemer putative phospholipase A2 (by homology) orf19.5239       | 12579 IPF12579 | Lipid fatty-acid and isoprenoid metabolism                                                              | molecular_function unknown           |
| CA5008 | 1.0 | 0.9 | 1.0 | 1.0 | 0.9 | 1.0 | IPF12577   | complemer unknown function orf19.5238                              | 12577 IPF12577 | No significant S.c. match                                                                               |                                      |
| CA5009 | 0.9 | 0.9 | 1.0 | 1.0 | 1.1 | 0.9 | VPH2       | 15259729..H+-ATPase assembly protein (by homology) orf19.5237      | 13946 CaVPH2   | PROTEIN FATE [folding modification destination] ""SUBCELLULAR LOCALISATION                              | molecular_function unknown           |
| CA5010 | 1.0 | 0.9 | 1.1 | 1.0 | 1.1 | 1.1 | IPF13945   | 15260525..Unknown function orf19.5236                              | 13945 IPF13945 | PROTEIN FATE [folding modification destination] ""CONTROL OF CELLULAR ORGANIZATION                      |                                      |
| CA5011 | 1.0 | 1.1 | 1.0 | 1.0 | 1.1 | 1.0 | IPF13944   | 15260959..unknown function orf19.5235                              | 13944 IPF13944 | PROTEIN FATE [folding modification destination] ""CONTROL OF CELLULAR ORGANIZATION                      |                                      |
| CA5012 | 1.0 | 1.0 | 0.9 | 0.9 | 0.9 | 0.9 | IPF13943   | complemer Unknown function orf19.5234                              | 13943 IPF13943 | No significant S.c. match                                                                               |                                      |
| CA5013 | 1.1 | 1.1 | 0.9 | 1.2 | 1.0 | 1.0 | IPF13941   | complemer Unknown function orf19.5234                              | 13941 IPF13941 | SUBCELLULAR LOCALISATION TRANSPORT FACILITATION                                                         |                                      |
| CA5014 | 1.0 | 1.0 | 1.0 | 1.0 | 1.0 | 1.0 | IPF11120   | complemer similar to Saccharomyces cerevisiae orf19.6966           | 11120 IPF11120 | Lipid fatty-acid and isoprenoid metabolism ""SUBCELLULAR LOCALISATION transferase activity              |                                      |
| CA5015 | 1.1 | 1.1 | 0.9 | 1.1 | 1.0 | 1.1 | IPF11118   | 15275852..unknown function orf19.6967                              | 11118 IPF11118 | CELLULAR TRANSPORT AND TRANSPORT MECHANISMS SUBCELLULAR LOCALISATION                                    |                                      |
| CA5016 | 1.0 | 1.0 | 1.0 | 1.0 | 1.0 | 1.1 | IPF7561    | 15282767..unknown function orf19.6968                              | 7561 IPF7561   | No significant S.c. match                                                                               |                                      |
| CA5017 | 1.1 | 1.0 | 1.0 | 1.1 | 1.0 | 1.0 | IPF7559    | complemer unknown function orf19.6970                              | 7559 IPF7559   | UNCLASSIFIED PROTEINS                                                                                   |                                      |
| CA5018 | 1.0 | 1.0 | 1.0 | 1.0 | 1.0 | 1.0 | IPF7558    | 15287768..unknown function orf19.6971                              | 7558 IPF7558   | C-compound and carbohydrate metabolism                                                                  | transferase activity                 |
| CA5019 | 0.9 | 0.9 | 0.9 | 0.9 | 0.9 | 1.0 | IPF7557    | complemer similar to Saccharomyces cerevisiae orf19.6972           | 7557 IPF7557   | C-compound and carbohydrate metabolism SUBCELLULAR LOCALISATION                                         |                                      |
| CA5020 | 1.0 | 1.0 | 0.9 | 0.9 | 1.0 | 0.9 | IPF7556    | complemer similar to Saccharomyces cerevisiae orf19.6973           | 7556 IPF7556   | TRANSCRIPTION ""PROTEIN FATE [folding modification destination] ""SUBCELLULAR LOCALISATION              |                                      |
| CA5021 | 1.0 | 1.0 | 1.1 | 1.0 | 0.9 | 1.1 | YST1.EXON2 | complemer Ribosomal protein, exc YST1 prote orf19.6975             | 7549 CaYST1    | PROTEIN SYNTHESIS ""PROTEIN FATE [folding modification destination] structural molecule activity        |                                      |
| CA5023 | 1.0 | 1.1 | 1.0 | 1.0 | 1.0 | 1.0 | IPF7547    | complemer unknown function orf19.6976                              | 7547 IPF7547   | UNCLASSIFIED PROTEINS                                                                                   | molecular_function unknown           |
| CA5024 | 1.1 | 1.2 | 1.0 | 0.9 | 1.0 | 1.0 | IPF3009    | complemer similar to Saccharomyces cerevisiae orf19.6977           | 3009 IPF3009   | Lipid fatty-acid and isoprenoid metabolism ""CELLULAR COMMUNICATION                                     | molecular_function unknown           |
| CA5025 | 1.0 | 1.1 | 0.9 | 0.9 | 0.9 | 1.0 | AMI3       | 15306272..protein required for normal mitochondria orf19.6979      | 3003 CaAMI3    | UNCLASSIFIED PROTEINS                                                                                   | molecular_function unknown           |
| CA5026 | 1.0 | 0.9 | 1.1 | 1.1 | 1.0 | 1.1 | IPF3001    | 15310230..serine/threonine protein kinase (by homology) orf19.6980 | 3001 IPF3001   | CELL RESCUE DEFENSE AND VIRULENCE                                                                       |                                      |
| CA5027 | 0.9 | 1.0 | 1.1 | 1.0 | 1.1 | 1.1 | IPF2999    | 15312312..unknown function orf19.6981                              | 2999 IPF2999   | UNCLASSIFIED PROTEINS                                                                                   | molecular_function unknown           |
| CA5028 | 1.0 | 1.0 | 0.9 | 1.1 | 1.0 | 1.1 | IPF2998    | complemer unknown function orf19.6982                              | 2998 IPF2998   | UNCLASSIFIED PROTEINS                                                                                   | molecular_function unknown           |

|        |     |     |     |     |     |     |            |                                                        |             |       |           |                                                                              |                                                        |
|--------|-----|-----|-----|-----|-----|-----|------------|--------------------------------------------------------|-------------|-------|-----------|------------------------------------------------------------------------------|--------------------------------------------------------|
| CA5029 | 1.1 | 1.0 | 1.0 | 0.9 | 1.0 | 1.1 | IPF2997    | complemer unknown function                             | orf19.6983  | 2997  | IPF2997   | C-compound and carbohydrate metabolism                                       | TRANSCRIPTION SUBCELLULAR LOCALISATION                 |
| CA5030 | 1.0 | 1.0 | 1.0 | 1.0 | 0.9 | 1.0 | IPF2988    | 15331189..unknown function                             | orf19.6984  | 2988  | IPF2988   | UNCLASSIFIED PROTEINS                                                        |                                                        |
| CA5031 | 1.0 | 0.9 | 1.0 | 1.2 | 1.0 | 1.0 | IPF20023   | 15333873..similar to Saccharomyces cerevisi            | orf19.6985  | 20023 | IPF20023  | TRANSCRIPTION SUBCELLULAR LOCALISATION                                       | DNA binding                                            |
| CA5032 | 1.0 | 1.0 | 1.0 | 1.1 | 1.0 | 1.0 | IPF2982    | 15338446..unknown function                             | orf19.6986  | 2982  | IPF2982   | UNCLASSIFIED PROTEINS                                                        |                                                        |
| CA5033 | 1.0 | 1.0 | 0.9 | 1.0 | 0.9 | 1.1 | DNM1       | complemer Dynamin-related protein (by homo             | orf19.6987  | 2980  | CaDNM1    | SUBCELLULAR LOCALISATION                                                     | hydrolase activity                                     |
| CA5034 | 1.0 | 1.0 | 1.0 | 1.0 | 1.0 | 1.1 | OST1       | 15344570..oligosaccharyltransferase                    | orf19.6988  | 4532  | CaOST1    | C-compound and carbohydrate metabolism                                       | ""PROTEIN FATE [folding mtransferase activity          |
| CA5035 | 1.0 | 1.0 | 1.1 | 1.0 | 1.0 | 1.0 | IPF4531    | complemer unknown function                             | orf19.6989  | 4531  | IPF4531   | CLASSIFICATION NOT YET CLEAR-CUT                                             |                                                        |
| CA5036 | 1.0 | 1.0 | 1.0 | 1.0 | 1.0 | 1.0 | CYP52      | complemer Peptidyl-prolyl cis-trans isomerase          | orf19.6990  | 4530  | CaCYP52   | PROTEIN FATE [folding modification destination]                              | ""SUBCELLULAR LOCALISATION                             |
| CA5037 | 1.0 | 0.9 | 1.1 | 1.1 | 1.1 | 1.1 | PRE3       | 15347635..20S proteasome subunit (beta1)(b             | orf19.6991  | 4529  | CaPRE3    | PROTEIN FATE [folding modification destination]                              | """"CELL RESCUE DE peptidase activity                  |
| CA5038 | 1.0 | 1.0 | 1.0 | 1.0 | 1.0 | 0.9 | QDR2       | 15349554..putative antibiotic resistance prote         | orf19.6992  | 4526  | CaQDR2    | CELL RESCUE DEFENSE AND VIRULENCE                                            | ""TRANSPORT FACILITATION                               |
| CA5039 | 1.8 | 3.2 | 1.0 | 1.1 | 0.9 | 1.0 | GAP2       | complemer general amino acid permease (by              | orf19.6993  | 4523  | CaGAP2    | Amino acid metabolism                                                        | CELLULAR TRANSPORT AND TRANSPORT Mtransporter activity |
| CA5040 | 0.9 | 0.9 | 1.0 | 0.9 | 0.9 | 1.0 | BAT22      | complemer branched chain amino acid aminot             | orf19.6994  | 4517  | CaBAT22   | Amino acid metabolism                                                        | SUBCELLULAR LOCALISATION                               |
| CA5041 | 1.0 | 1.0 | 1.0 | 1.0 | 0.9 | 1.0 | FRP7       | 15357526..member of the FRP family of prote            | orf19.6995  | 4516  | CaFRP7    | C-compound and carbohydrate metabolism                                       |                                                        |
| CA5042 | 1.0 | 1.0 | 1.0 | 1.0 | 1.0 | 1.1 | IPF4514    | 15359151..putative alpha-1,3-mannosyltransf            | orf19.6996  | 4514  | IPF4514   | C-compound and carbohydrate metabolism                                       | ""PROTEIN FATE [folding modification destination]      |
| CA5043 | 1.0 | 0.9 | 1.1 | 1.0 | 0.9 | 1.0 | FRP4       | 15361837..member of the FRP family of prote            | orf19.6997  | 4513  | CaFRP4    | C-compound and carbohydrate metabolism                                       |                                                        |
| CA5044 |     |     |     |     |     |     | GTT2       | 15363476..15364279                                     |             |       |           |                                                                              |                                                        |
| CA5045 | 0.9 | 1.0 | 1.1 | 1.0 | 1.0 | 1.0 | IPF4510    | 15364750..unknown function                             | orf19.6999  | 4510  | IPF4510   | CELL RESCUE DEFENSE AND VIRULENCE                                            |                                                        |
| CA5046 | 1.0 | 1.0 | 1.1 | 1.1 | 1.1 | 1.0 | YCK2       | 15368249..casein kinase I (by homology)                | orf19.7001  | 4506  | CaYCK2    | CELL CYCLE AND DNA PROCESSING CELLULAR TRANSPORT AND protein kinase activity |                                                        |
| CA5047 | 1.0 | 1.0 | 1.0 | 1.0 | 1.0 | 1.0 | IPF4504    | complemer unknown function                             | orf19.7002  | 4504  | IPF4504   | No significant S.c. match                                                    |                                                        |
| CA5048 | 1.1 | 1.1 | 0.9 | 0.9 | 1.0 | 0.9 | IPF20024   | complemer unknown function                             | orf19.10531 | 20024 | IPF20024  | TRANSCRIPTION                                                                | transcription regulator activity                       |
| CA5049 | 0.9 | 0.9 | 1.0 | 0.9 | 1.0 | 1.1 | IPF3714    | complemer similar to Saccharomyr septin [Can           | orf19.3013  | 3714  | IPF3714   | C-compound and carbohydrate metabolism                                       | CELL CYCLE AND DNA PRstructural molecule activity      |
| CA5050 | 1.0 | 1.1 | 1.2 | 1.0 | 1.1 | 1.1 | BMH2       | complemer similar to Saccharomyr36232 prot             | orf19.3014  | 3712  | CaBMH2    | CELL CYCLE AND DNA PROCESSING CELLULAR COMMUNICATION                         | protein binding,DNA binding                            |
| CA5051 | 1.0 | 1.0 | 1.0 | 1.0 | 1.1 | 1.0 | IPF3709    | complemer unknown function                             | orf19.3015  | 3709  | IPF3709   | UNCLASSIFIED PROTEINS                                                        | molecular_function unknown                             |
| CA5052 | 1.0 | 1.0 | 1.0 | 1.0 | 0.9 | 1.0 | IPF3708    | 15385817..unknown function                             | orf19.3016  | 3708  | IPF3708   | No significant S.c. match                                                    |                                                        |
| CA5053 | 1.0 | 1.0 | 1.0 | 0.9 | 1.1 | 1.0 | IPF3707    | complemer unknown function                             | orf19.3018  | 3707  | IPF3707   | UNCLASSIFIED PROTEINS                                                        | DNA binding,transcription regulato                     |
| CA5054 | 0.9 | 0.9 | 1.0 | 1.1 | 1.0 | 0.9 | IPF3704    | 15387676..unknown function                             | orf19.3019  | 3704  | IPF3704   | CELL CYCLE AND DNA PROCESSING CONTROL OF CELLULAR OR                         | helicase activity                                      |
| CA5055 | 1.0 | 1.0 | 1.0 | 0.9 | 1.0 | 1.0 | IPF3701    | 15390160..unknown function                             | orf19.3021  | 3701  | IPF3701   | UNCLASSIFIED PROTEINS                                                        | molecular_function unknown                             |
| CA5056 | 1.0 | 1.1 | 1.0 | 0.9 | 1.1 | 1.0 | IPF3698    | 15391444..similar to Saccharomyces cerevisi            | orf19.3022  | 3698  | IPF3698   | PROTEIN SYNTHESIS                                                            | structural molecule activity                           |
| CA5057 | 0.8 | 1.0 | 1.0 | 0.9 | 1.0 | 1.0 | IPF3695    | 15392660..similar to Saccharomyces cerevisi            | orf19.3023  | 3695  | IPF3695   | C-compound and carbohydrate metabolism                                       | TRANSCRIPTION SUBCELLtranscription regulator activity  |
| CA5058 |     |     |     |     |     |     | MAS1       | complement(15394649..15396052)                         |             |       |           |                                                                              |                                                        |
| CA5059 | 1.0 | 1.1 | 0.9 | 0.9 | 0.9 | 1.0 | IPF3691    | 15396512..unknown function                             | orf19.3027  | 3691  | IPF3691   | SUBCELLULAR LOCALISATION                                                     |                                                        |
| CA5060 | 1.1 | 1.0 | 1.0 | 1.0 | 1.0 | 1.0 | IPF3690    | complemer unknown function                             | orf19.3029  | 3690  | IPF3690   | CLASSIFICATION NOT YET CLEAR-CUT                                             |                                                        |
| CA5061 | 0.9 | 1.0 | 1.0 | 1.1 | 1.1 | 1.0 | IPF8495    | complemer unknown function                             | orf19.3030  | 8495  | IPF8495   | UNCLASSIFIED PROTEINS                                                        | hydrolase activity                                     |
| CA5062 | 1.1 | 1.0 | 1.0 | 1.0 | 1.0 | 1.0 | SEC62      | complemer subunit of ER protein-translocator           | orf19.3031  | 8494  | CaSEC62   | PROTEIN FATE [folding modification destination]                              | ""CELLULAR TRANSPprotein binding                       |
| CA5063 | 1.0 | 1.0 | 1.0 | 1.0 | 1.0 | 1.0 | IPF8493    | complemer putative member of nontransporter            | orf19.3034  | 8493  | IPF8493   | TRANSPORT FACILITATION                                                       | transporter activity                                   |
| CA5064 | 1.1 | 1.1 | 1.1 | 1.0 | 1.0 | 1.2 | CHD1       | 15407747..transcriptional regulator (by homol          | orf19.3035  | 8489  | CaCHD1    | TRANSCRIPTION                                                                | transcription regulator activity                       |
| CA5065 | 1.0 | 1.0 | 1.2 | 1.1 | 1.0 | 1.0 | IPF3584    | 15412520..similar to Saccharomyces cerevisi            | orf19.3037  | 3584  | IPF3584   | TRANSCRIPTION PROTEIN SYNTHESIS SUBCELLULAR LOCALISAT                        | RNA binding                                            |
| CA5066 | 0.3 | 0.9 | 1.0 | 1.0 | 1.0 | 0.5 | TPS2       | 15415493..Threalose-6-phosphate trehalose-6            | orf19.3038  | 3588  | CaTPS2    | C-compound and carbohydrate metabolism                                       | ENERGY ""CELL RESCUE [hydrolase activity               |
| CA5067 | 1.1 | 1.1 | 1.0 | 1.0 | 1.0 | 0.9 | IPF3589    | 15418999..putative alcohol acyl transferase (t         | orf19.3040  | 3589  | IPF3589   | CLASSIFICATION NOT YET CLEAR-CUT                                             | molecular_function unknown                             |
| CA5068 | 1.1 | 1.1 | 1.1 | 1.1 | 0.9 | 0.8 | IPF3592    | 15421573..unknown function                             | orf19.3041  | 3592  | IPF3592   | UNCLASSIFIED PROTEINS                                                        | molecular_function unknown                             |
| CA5069 | 1.0 | 1.0 | 1.0 | 1.0 | 1.1 | 1.0 | IPF3593    | 15423778..unknown function                             | orf19.3042  | 3593  | IPF3593   | No significant S.c. match                                                    |                                                        |
| CA5070 | 1.0 | 1.0 | 1.1 | 1.0 | 1.0 | 0.8 | IPF3594    | 15425647..triglyceride lipase (by homology)            | orf19.3043  | 3594  | IPF3594   | Lipid fatty-acid and isoprenoid metabolism                                   | hydrolase activity                                     |
| CA5071 | 1.0 | 1.1 | 0.9 | 1.0 | 1.0 | 1.0 | IPF3597    | complemer similar to Saccharomyces cerevisi            | orf19.3045  | 3597  | IPF3597   | CLASSIFICATION NOT YET CLEAR-CUT                                             |                                                        |
| CA5072 | 1.0 | 0.9 | 0.9 | 1.0 | 0.9 | 1.0 | IPF3598    | complemer similar to Saccharomyces cerevisi            | orf19.3047  | 3598  | IPF3598   | C-compound and carbohydrate metabolism                                       | transcription regulator activity                       |
| CA5073 | 1.0 | 1.0 | 0.9 | 1.0 | 1.0 | 1.0 | IPF3603    | complemer unknown function                             | orf19.3048  | 3603  | IPF3603   | No significant S.c. match                                                    |                                                        |
| CA5074 | 1.0 | 1.0 | 0.9 | 1.0 | 0.9 | 0.9 | IPF3607    | complemer putative serine/threonine protein k          | orf19.3049  | 3607  | IPF3607   | CELL CYCLE AND DNA PROCESSING CELL FATE                                      | protein kinase activity                                |
| CA5075 | 1.1 | 0.9 | 1.0 | 0.9 | 1.0 | 1.0 | IPF3610    | complemer unknown function                             | orf19.3050  | 3610  | IPF3610   | UNCLASSIFIED PROTEINS                                                        | enzyme regulator activity                              |
| CA5076 | 0.9 | 1.0 | 1.0 | 0.9 | 1.0 | 1.0 | IPF15301   | 15442825..unknown function                             | orf19.3051  | 15301 | IPF15301  | UNCLASSIFIED PROTEINS                                                        | molecular_function unknown                             |
| CA5077 | 1.0 | 1.0 | 1.0 | 0.9 | 1.2 | 1.0 | YPT1       | 15444263..GTP-binding protein of the rab fa            | orf19.3052  | 15299 | CaYPT1    | CELLULAR TRANSPORT AND TRANSPORT MECHANISMS SUBCELL                          | hydrolase activity                                     |
| CA5078 | 1.1 | 1.1 | 1.0 | 1.0 | 0.9 | 1.0 | IPF15297   | complemer unknown function                             | orf19.3053  | 15297 | IPF15297  | No significant S.c. match                                                    |                                                        |
| CA5079 | 1.1 | 1.0 | 1.0 | 1.2 | 1.0 | 0.9 | RPN3       | 15446623..26S proteasome regulatory subun              | orf19.3054  | 9265  | CaRPN3    | PROTEIN FATE [folding modification destination]                              | ""SUBCELLULAR LOCpeptidase activity                    |
| CA5080 | 0.9 | 0.9 | 0.9 | 0.9 | 1.0 | 1.0 | IPF9268.3  | 15448391..similar to Saccharomyces cerevisi            | orf19.3055  | 9268  | IPF9268.3 | TRANSCRIPTION SUBCELLULAR LOCALISATION                                       | transcription regulator activity                       |
| CA5081 | 0.9 | 1.0 | 1.1 | 1.1 | 1.0 | 1.1 | COQ6       | complemer monooxygenase (by homology)                  | orf19.3058  | 9273  | CaCOQ6    | Metabolism of vitamins cofactors and prosthetic groups                       | oxidoreductase activity                                |
| CA5082 | 1.1 | 1.0 | 0.9 | 0.9 | 1.1 | 0.9 | SUA70      | complemer TFIIIB subunit (transcription initi          | orf19.3059  | 9274  | CaSUA70   | TRANSCRIPTION SUBCELLULAR LOCALISATION                                       | transcription regulator activity                       |
| CA5083 | 1.1 | 0.9 | 1.0 | 1.2 | 1.0 | 0.9 | IPF9278    | 15455618..similar to Saccharomyces cerevisi            | orf19.3060  | 9278  | IPF9278   | C-compound and carbohydrate metabolism                                       | ""PROTEIN FATE [folding mtransferase activity          |
| CA5084 | 0.9 | 0.9 | 1.0 | 1.0 | 1.0 | 1.0 | IMP1       | complemer protease, mitochondrial (by homol            | orf19.3061  | 9279  | CaIMP1    | PROTEIN FATE [folding modification destination]                              | ""SUBCELLULAR LOCpeptidase activity                    |
| CA5085 | 1.0 | 0.9 | 0.9 | 1.0 | 1.0 | 1.1 | RPS22.EXON | complemer ribosomal protein S15a, exon 2 (by homology) |             | 9280  | CaRPS22   | PROTEIN SYNTHESIS SUBCELLULAR LOCALISATION                                   |                                                        |
| CA5087 | 1.0 | 1.0 | 1.0 | 1.0 | 1.0 | 1.1 | IPF20025   | complemer unknown function                             | orf19.3062  | 20025 | IPF20025  | CELL RESCUE DEFENSE AND VIRULENCE                                            | ""UNCLASSIFIED PROTEmolecular_function unknown         |
| CA5088 | 0.9 | 0.9 | 1.0 | 0.9 | 1.0 | 0.9 | IPF9758    | complemer similar to Saccharomyces cerevisi            | orf19.3063  | 9758  | IPF9758   | CELL CYCLE AND DNA PROCESSING SUBCELLULAR LOCALISATION                       | nucleotidytransferase activity                         |
| CA5089 | 1.0 | 1.0 | 1.0 | 1.1 | 1.0 | 1.0 | MRPL27     | complemer ribosomal protein (by homology)              | orf19.3064  | 9757  | CaMRPL27  | PROTEIN SYNTHESIS SUBCELLULAR LOCALISATION                                   | structural molecule activity                           |
| CA5090 | 1.1 | 1.0 | 1.0 | 0.9 | 0.9 | 1.0 | IFG4       | complemer probable d-amino acid oxidase (by            | orf19.3065  | 9755  | CaIFG4    | No significant S.c. match                                                    |                                                        |
| CA5091 | 1.0 | 1.0 | 1.0 | 1.0 | 1.0 | 0.9 | ACF3       | 15467452..endo-1,3-beta-glucana endo-1,3-b             | orf19.1058  | 9751  | CaACF3    | CLASSIFICATION NOT YET CLEAR-CUT                                             | hydrolase activity                                     |
| CA5092 | 0.9 | 1.0 | 1.0 | 0.9 | 1.0 | 1.0 | IPF1394    | complemer unknown function                             | orf19.6450  | 1394  | IPF1394   | No significant S.c. match                                                    |                                                        |
| CA5093 | 1.1 | 0.9 | 1.1 | 1.0 | 0.9 | 1.0 | IPF1390    | complemer unknown function                             | orf19.6449  | 1390  | IPF1390   | No significant S.c. match                                                    |                                                        |
| CA5094 | 0.9 | 1.0 | 1.0 | 1.1 | 0.9 | 1.0 | IPF1387    | complemer unknown function                             | orf19.6448  | 1387  | IPF1387   | No significant S.c. match                                                    |                                                        |
| CA5095 | 1.0 | 1.0 | 0.9 | 1.0 | 1.0 | 1.0 | ARF21      | 15479458..GTP-binding protein of the ARF fa            | orf19.6447  | 1386  | CaARF21   | PROTEIN FATE [folding modification destination]                              | ""CELLULAR TRANSPORT AND TRANSPORT MECHAN              |
| CA5096 | 1.0 | 1.1 | 1.0 | 1.0 | 1.0 | 1.0 | IPF1384    | 15480233..similar to Saccharomyces cerevisi            | orf19.6445  | 1384  | IPF1384   | Lipid fatty-acid and isoprenoid metabolism                                   | ""ENERGY SUBCELLULAR L isomerase activity              |
| CA5097 | 1.2 | 1.2 | 1.0 | 1.0 | 1.2 | 1.1 | IPF1382    | 15481253..unknown function                             | orf19.6444  | 1382  | IPF1382   | UNCLASSIFIED PROTEINS                                                        | molecular_function unknown                             |
| CA5098 | 1.0 | 1.1 | 1.0 | 1.0 | 1.0 | 1.0 | IPF1380    | 15483540..delta3-cis-delta2-trans-enoyl-CoA            | orf19.6443  | 1380  | IPF1380   | Lipid fatty-acid and isoprenoid metabolism                                   | ""ENERGY SUBCELLULAR LOCALISATION                      |
| CA5099 | 0.9 | 1.1 | 1.0 | 1.0 | 0.9 | 1.1 | PRP8       | complemer U5 snRNP protein, pre-mRNA spli              | orf19.6442  | 1378  | CaPRP8    | CELL CYCLE AND DNA PROCESSING TRANSCRIPTION SUBCELLULAR                      | RNA binding                                            |
| CA5100 | 1.1 | 1.1 | 1.0 | 1.0 | 1.0 | 1.0 | IPF1372    | 15492089..unknown function                             | orf19.6440  | 1372  | IPF1372   | UNCLASSIFIED PROTEINS                                                        | ligase activity                                        |
| CA5101 | 1.0 | 1.0 | 1.0 | 1.0 | 1.0 | 1.0 | LCB1       | 15494654..Serine C-palmitoyltransferase sub            | orf19.6438  | 1370  | CaLCB1    | Lipid fatty-acid and isoprenoid metabolism                                   | transferase activity                                   |

|        |     |     |     |     |     |     |             |                                                          |             |       |           |                                                                                              |                                  |
|--------|-----|-----|-----|-----|-----|-----|-------------|----------------------------------------------------------|-------------|-------|-----------|----------------------------------------------------------------------------------------------|----------------------------------|
| CA5102 | 1.0 | 1.0 | 1.0 | 1.0 | 0.9 | 1.0 | CDC23       | complemer Subunit of anaphase-promoting co               | orf19.6437  | 1368  | CaCDC23   | CELL CYCLE AND DNA PROCESSING ""PROTEIN FATE [folding modif                                  | protein binding                  |
| CA5103 | 1.0 | 0.9 | 1.0 | 1.0 | 1.1 | 1.0 | IPF1367     | 15498434..unknown function                               | orf19.6436  | 1367  | IPF1367   | No significant S.c. match                                                                    |                                  |
| CA5104 | 1.1 | 1.1 | 1.0 | 1.0 | 1.0 | 1.0 | IPF1364     | complemer unknown function                               | orf19.6435  | 1364  | IPF1364   | UNCLASSIFIED PROTEINS                                                                        | molecular_function unknown       |
| CA5105 | 1.1 | 1.1 | 1.0 | 0.9 | 1.0 | 1.0 | PEX19       | 15500780..Required for biogenesis of peroxis             | orf19.6434  | 1363  | CaPEX19   | SUBCELLULAR LOCALISATION                                                                     | molecular_function unknown       |
| CA5106 | 1.1 | 1.1 | 1.0 | 1.0 | 1.0 | 0.8 | AFG2        | complemer Member of the Sec18p, Pas1p, Cco               | orf19.6432  | 1361  | CaAFG2    | UNCLASSIFIED PROTEINS                                                                        | hydrolase activity               |
| CA5107 | 1.0 | 1.0 | 0.9 | 1.0 | 1.0 | 1.0 | IPF1358     | 15504327..unknown function                               | orf19.6431  | 1358  | IPF1358   | No significant S.c. match                                                                    |                                  |
| CA5108 | 1.0 | 1.0 | 1.0 | 1.0 | 1.0 | 1.1 | SK12        | complemer Antiviral protein and putative helic           | orf19.6425  | 1354  | CaSK12    | CELL RESCUE DEFENSE AND VIRULENCE ""SUBCELLULAR LOCAL RNA binding,helicase activity,trans    |                                  |
| CA5109 | 1.1 | 1.0 | 0.9 | 1.0 | 1.0 | 1.0 | UBC9        | 15508929..E2 ubiquitin-conjugating enzyme (              | orf19.6424  | 1348  | CaUBC9    | CELL CYCLE AND DNA PROCESSING ""PROTEIN FATE [folding modification destination] ""SUBCELLUL  |                                  |
| CA5110 | 1.1 | 1.0 | 1.0 | 0.9 | 1.0 | 0.9 | FBP26       | complemer Fructose-2,6-bisphosphatase (by f              | orf19.6423  | 1347  | CaFBP26   | C-compound and carbohydrate metabolism SUBCELLULAR LOCALISA1                                 | hydrolase activity               |
| CA5111 | 1.1 | 1.1 | 1.0 | 1.0 | 1.0 | 1.0 | SSY5        | 15511240..Involved in sulfonylurea herbicide             | orf19.6422  | 1345  | CaSSY5    | REGULATION OF/INTERACTION WITH CELLULAR ENVIRONMENT                                          |                                  |
| CA5112 | 1.0 | 1.0 | 1.1 | 1.4 | 1.1 | 1.3 | IPF1341     | complemer Similarity to mucin proteins (by ho            | orf19.6420  | 1341  | IPF1341   | No significant S.c. match                                                                    |                                  |
| CA5113 | 0.9 | 0.9 | 1.0 | 1.1 | 1.0 | 1.0 | IPF20026    | complemer unknown function                               | orf19.6418  | 20026 | IPF20026  | UNCLASSIFIED PROTEINS                                                                        | molecular_function unknown       |
| CA5114 | 1.0 | 1.1 | 1.0 | 1.1 | 1.0 | 1.0 | IPF1334     | complemer Conserved hypothetical protein                 | orf19.6417  | 1334  | IPF1334   | UNCLASSIFIED PROTEINS                                                                        | molecular_function unknown       |
| CA5115 | 1.0 | 0.9 | 1.0 | 0.9 | 1.0 | 0.9 | IPF1331     | complemer unknown function                               | orf19.6416  | 1331  | IPF1331   | UNCLASSIFIED PROTEINS                                                                        | molecular_function unknown       |
| CA5116 | 0.6 | 0.5 | 0.9 | 0.8 | 0.9 | 0.9 | TPM2.3      | complemer Tropomyosin, 3-prime end                       |             | 1325  | CaTPM2.3  | CELL FATE SUBCELLULAR LOCALISATION                                                           | protein binding                  |
| CA5117 | 1.0 | 1.0 | 1.0 | 0.9 | 1.0 | 0.9 | IPF1323     | 15530494..unknown function                               | orf19.6414  | 1323  | IPF1323   | No significant S.c. match                                                                    |                                  |
| CA5118 | 1.1 | 1.0 | 1.0 | 1.0 | 1.0 | 0.9 | IPF1321     | complemer unknown function                               | orf19.6413  | 1321  | IPF1321   | No significant S.c. match                                                                    |                                  |
| CA5119 | 1.1 | 1.0 | 1.0 | 0.9 | 1.0 | 1.0 | IPF1320     | complemer unknown function                               | orf19.6411  | 1320  | IPF1320   | UNCLASSIFIED PROTEINS                                                                        | enzyme regulator activity        |
| CA5120 | 1.0 | 1.0 | 0.9 | 0.9 | 0.9 | 1.1 | YDJ1        | complemer Mitochondrial and ER import prote              | orf19.6408  | 1317  | CaYDJ1    | CELL CYCLE AND DNA PROCESSING ""PROTEIN FATE [folding modification destination] ""CELLULAR T |                                  |
| CA5121 | 1.0 | 1.0 | 1.1 | 1.0 | 0.9 | 1.1 | IPF1310     | complemer unknown function                               | orf19.6407  | 1310  | IPF1310   | PROTEIN FATE [folding modification destination]                                              | molecular_function unknown       |
| CA5122 | 1.0 | 1.0 | 0.9 | 1.0 | 0.9 | 1.0 | IPF1308     | 15541942..Similarity to ribosomal protein S13            | orf19.6406  | 1308  | IPF1308   | PROTEIN SYNTHESIS                                                                            | molecular_function unknown       |
| CA5123 | 0.9 | 1.0 | 1.0 | 1.0 | 0.9 | 1.0 | IPF1306     | 15543459..unknown function                               | orf19.6405  | 1306  | IPF1306   | UNCLASSIFIED PROTEINS                                                                        | molecular_function unknown       |
| CA5124 | 1.0 | 1.0 | 0.9 | 0.9 | 0.9 | 1.0 | GSH2        | complemer Glutathione synthetase (by homol               | orf19.6404  | 1304  | CaGSH2    | Metabolism of vitamins cofactors and prosthetic groups                                       | ligase activity                  |
| CA5125 | 1.0 | 1.1 | 0.6 | 0.9 | 0.9 | 0.9 | RPP2        | 15546934..acidic ribosomal protei 60S acidic ribosomal p |             | 5111  | CaRPP2    | PROTEIN SYNTHESIS SUBCELLULAR LOCALISATION                                                   | structural molecule activity     |
| CA5126 | 0.9 | 1.0 | 1.1 | 0.9 | 1.1 | 0.9 | SLS1        | complemer Endoplasmic translocation machin               | orf19.6403  | 5113  | CaSLS1    | PROTEIN FATE [folding modification destination] ""SUBCELLULAR LOC                            | molecular_function unknown       |
| CA5127 | 1.0 | 1.0 | 1.0 | 1.0 | 1.1 | 1.1 | CYS3        | complemer cystathionine gamma-lyase by hor               | orf19.6402  | 5115  | CaCYS3    | Amino acid metabolism SUBCELLULAR LOCALISATION                                               | lyase activity                   |
| CA5128 | 0.9 | 1.0 | 1.0 | 0.9 | 0.9 | 1.0 | IPF5118     | complemer unknown function                               | orf19.1375i | 5118  | IPF5118   | UNCLASSIFIED PROTEINS                                                                        | molecular_function unknown       |
| CA5129 | 1.0 | 1.0 | 0.9 | 1.0 | 1.0 | 1.0 | ATS1        | complemer similar to Saccharomyces cerevisi              | orf19.1375  | 5119  | CaATS1    | SUBCELLULAR LOCALISATION                                                                     | molecular_function unknown       |
| CA5130 | 0.9 | 1.0 | 1.1 | 1.0 | 0.9 | 1.0 | IFH2        | 15553854..Dioxygenase (by homology)                      | orf19.1375i | 5121  | CaIFH2    | CELL RESCUE DEFENSE AND VIRULENCE                                                            |                                  |
| CA5131 |     |     |     |     |     |     | IPF5124     | 15555334..15559494                                       |             |       |           |                                                                                              |                                  |
| CA5132 | 1.1 | 1.0 | 1.0 | 1.0 | 0.9 | 1.0 | GTS1        | complemer Transcription factor by homology               | orf19.6393  | 5128  | CaGTS1    | CELL CYCLE AND DNA PROCESSING TRANSCRIPTION ""CELL RES                                       | molecular_function unknown       |
| CA5133 | 1.0 | 1.0 | 1.0 | 1.0 | 1.0 | 1.0 | IPF5129     | complemer unknown function                               | orf19.6392  | 5129  | IPF5129   | No significant S.c. match                                                                    |                                  |
| CA5134 | 1.1 | 1.1 | 1.0 | 1.0 | 1.0 | 1.0 | IPF5131     | complemer unknown function                               | orf19.6391  | 5131  | IPF5131   | No significant S.c. match                                                                    |                                  |
| CA5135 | 0.6 | 0.7 | 0.6 | 0.5 | 0.8 | 0.3 | HSP104      | 15564334..Heat shock protein (by heat shock              | orf19.1374  | 5137  | CaHSP104  | PROTEIN FATE [folding modification destination] """"CELL RESCUE DE                           | chaperone activity               |
| CA5136 | 1.0 | 0.9 | 0.9 | 1.0 | 0.9 | 1.0 | IPF5139     | 15568890..unknown function                               | orf19.1374  | 5139  | IPF5139   | No significant S.c. match                                                                    |                                  |
| CA5137 | 0.9 | 0.9 | 1.0 | 1.2 | 1.0 | 1.0 | IPF1032     | 15572535..similar to probable membrane prot              | orf19.4574  | 1032  | IPF1032   | UNCLASSIFIED PROTEINS                                                                        | molecular_function unknown       |
| CA5138 | 0.9 | 1.0 | 0.9 | 1.0 | 1.0 | 1.0 | IPF1031     | 15574679..Similar to aminoglycoside acetyltr             | orf19.4575  | 1031  | IPF1031   | CLASSIFICATION NOT YET CLEAR-CUT                                                             | molecular_function unknown       |
| CA5139 | 1.0 | 1.0 | 1.0 | 1.0 | 1.0 | 1.0 | IPF1027     | 15577328..unknown function                               | orf19.4577  | 1027  | IPF1027   | UNCLASSIFIED PROTEINS                                                                        | signal transducer activity       |
| CA5140 | 1.0 | 1.0 | 0.9 | 0.9 | 1.0 | 0.9 | TIM10       | 15580869..Subunit of the Tim22-complex (by homology)     |             | 1024  | CaTIM10   | No significant S.c. match                                                                    |                                  |
| CA5141 | 1.0 | 1.0 | 1.0 | 1.0 | 1.1 | 1.1 | CYT2        | complemer holocytochrome-c1 synthase (by h               | orf19.4578  | 1023  | CaCYT2    | Metabolism of vitamins cofactors and prosthetic groups """"PROTEIN FA                        | lyase activity                   |
| CA5142 | 1.1 | 1.1 | 1.0 | 1.2 | 1.0 | 1.0 | IPF1022     | complemer similar to Saccharomyces cerevisi              | orf19.4579  | 1022  | IPF1022   | UNCLASSIFIED PROTEINS                                                                        | molecular_function unknown       |
| CA5143 | 1.0 | 0.9 | 1.1 | 1.0 | 1.0 | 1.0 | IPF1020     | complemer Weak similarity to N. crassa hypot             | orf19.4580  | 1020  | IPF1020   | UNCLASSIFIED PROTEINS                                                                        |                                  |
| CA5144 | 1.0 | 1.1 | 1.0 | 1.0 | 1.0 | 1.0 | IPF1019     | 15585165..unknown function                               | orf19.4581  | 1019  | IPF1019   | UNCLASSIFIED PROTEINS                                                                        | transferase activity             |
| CA5145 | 0.9 | 1.0 | 1.1 | 1.0 | 0.9 | 0.9 | SKI6        | 15586468..3 ->5 exoribonuclease (by homol                | orf19.4582  | 1018  | CaSKI6    | No significant S.c. match                                                                    |                                  |
| CA5146 | 1.0 | 1.0 | 1.0 | 0.9 | 1.0 | 1.1 | YMC2        | complemer Carnitine/acylcarnitine translocase            | orf19.4583  | 1017  | CaYMC2    | CELLULAR TRANSPORT AND TRANSPORT MECHANISMS SUBCELLULAR LOCALISATION                         |                                  |
| CA5147 | 1.0 | 1.0 | 1.0 | 1.0 | 1.0 | 0.9 | PHO12       | complemer Acid phosphatase, secreted (by h               | orf19.4584  | 1016  | CaPHO12   | Phosphate metabolism SUBCELLULAR LOCALISATION                                                |                                  |
| CA5148 | 0.9 | 1.0 | 1.0 | 1.0 | 1.0 | 1.0 | TFG1        | 15590768..RNA pol.II transcription initiation f          | orf19.4585  | 1015  | CaTFG1    | TRANSCRIPTION SUBCELLULAR LOCALISATION                                                       | transcription regulator activity |
| CA5149 | 1.0 | 1.0 | 0.9 | 1.0 | 1.0 | 1.1 | HGH1        | complemer Similar to human HMG1 and HMG                  | orf19.4587  | 1013  | CaHGH1    | UNCLASSIFIED PROTEINS                                                                        | molecular_function unknown       |
| CA5150 | 1.0 | 0.9 | 1.0 | 1.1 | 1.1 | 1.0 | FMS1        | complemer Similar to corticosteroid-binding pr           | orf19.4589  | 1011  | CaFMS1    | Metabolism of vitamins cofactors and prosthetic groups                                       | oxidoreductase activity          |
| CA5151 | 1.0 | 1.0 | 1.0 | 1.0 | 0.9 | 0.9 | IPF1009     | complemer Weak similarity to S. cerevisiae R             | orf19.4590  | 1009  | IPF1009   | TRANSCRIPTION SUBCELLULAR LOCALISATION                                                       |                                  |
| CA5152 | 1.1 | 1.1 | 1.0 | 1.0 | 1.0 | 1.1 | CAT2        | complemer carnitine O-acetyltransferase (by              | orf19.4591  | 1006  | CaCAT2    | Lipid fatty-acid and isoprenoid metabolism ""CELLULAR TRANSPORT A                            | transferase activity             |
| CA5153 | 0.9 | 1.1 | 0.9 | 1.0 | 1.0 | 1.0 | IPF1003     | 15607847..unknown function                               | orf19.4592  | 1003  | IPF1003   | No significant S.c. match                                                                    |                                  |
| CA5154 | 1.1 | 1.0 | 0.9 | 1.1 | 1.1 | 1.1 | RG2A        | 15612572..rho-GTPase activating protein 2 (b             | orf19.4593  | 1000  | CaRG2A    | CELL FATE                                                                                    | signal transducer activity       |
| CA5155 | 1.0 | 1.0 | 1.1 | 1.0 | 1.0 | 1.0 | IPF995      | complemer unknown function                               |             | 995   | IPF995    | UNCLASSIFIED PROTEINS                                                                        | molecular_function unknown       |
| CA5156 | 1.1 | 1.0 | 1.1 | 1.0 | 1.1 | 1.0 | CLC1        | 15616949..clathrin light chain (by homology)             | orf19.4594  | 994   | CaCLC1    | CELLULAR TRANSPORT AND TRANSPORT MECHANISMS CELL FA1                                         | structural molecule activity     |
| CA5157 | 1.0 | 1.1 | 1.0 | 1.1 | 1.0 | 1.0 | IPF993      | complemer unknown function                               | orf19.4595  | 993   | IPF993    | No significant S.c. match                                                                    |                                  |
| CA5158 | 0.9 | 1.0 | 1.0 | 1.0 | 1.0 | 0.9 | IPF992      | 15619879..unknown function                               | orf19.4596  | 992   | IPF992    | No significant S.c. match                                                                    |                                  |
| CA5159 | 1.1 | 1.0 | 1.0 | 0.9 | 1.0 | 1.0 | CAP2        | complemer F-actin capping protein, beta subu             | orf19.4597  | 990   | CaCAP2    | CELL FATE SUBCELLULAR LOCALISATION                                                           | protein binding                  |
| CA5160 | 1.2 | 1.3 | 1.0 | 1.0 | 1.0 | 1.0 | PHO89       | complemer Na+-coupled phosphate transport                | orf19.4599  | 988   | CaPHO89   | Phosphate metabolism REGULATION OF/INTERACTION WITH CELLU                                    | transporter activity             |
| CA5161 | 1.1 | 1.0 | 1.0 | 1.1 | 1.0 | 1.0 | IPF983      | 15628986..unknown function                               | orf19.4600  | 983   | IPF983    | UNCLASSIFIED PROTEINS                                                                        | molecular_function unknown       |
| CA5162 | 1.0 | 1.0 | 0.9 | 1.0 | 1.0 | 1.0 | IPF982      | complemer Weakly similar to human dolichol-phosphate-n   |             | 982   | IPF982    | No significant S.c. match                                                                    |                                  |
| CA5163 | 0.9 | 1.1 | 1.0 | 1.0 | 1.0 | 1.0 | TFC1        | complemer Transcription initiation factor TFII           | orf19.4601  | 6022  | CaTFC1    | TRANSCRIPTION CONTROL OF CELLULAR ORGANIZATION SUBCE                                         | transcription regulator activity |
| CA5164 | 1.1 | 1.1 | 0.8 | 0.9 | 0.9 | 1.0 | MDH1        | 15632903..Mitochondrial malate dehydrogen                | orf19.4602  | 6025  | CaMDH1    | C-compound and carbohydrate metabolism ENERGY SUBCELLULAR L                                  | oxidoreductase activity          |
| CA5165 | 1.0 | 1.1 | 0.9 | 1.1 | 1.1 | 0.9 | ARL1        | 15634415..GTP-binding protein of the ARF fa              | orf19.4603  | 6027  | CaARL1    | PROTEIN FATE [folding modification destination] ""CELLULAR TRANSP                            | hydrolase activity               |
| CA5166 | 1.1 | 1.0 | 1.0 | 1.0 | 1.0 | 0.9 | TYR1        | complemer Prephenate dehydrogenase (NAD                  | orf19.4605  | 6029  | CaTYR1    | Amino acid metabolism SUBCELLULAR LOCALISATION                                               | oxidoreductase activity          |
| CA5167 | 1.0 | 1.1 | 1.0 | 1.0 | 1.0 | 1.0 | ERG8        | 15636640..Phosphomevalonate kinase (by h                 | orf19.4606  | 6030  | CaERG8    | Lipid fatty-acid and isoprenoid metabolism ""SUBCELLULAR LOCALISA                            | transferase activity             |
| CA5168 | 1.0 | 0.9 | 0.9 | 1.0 | 1.0 | 1.0 | IPF6032     | 15638410..unknown function                               | orf19.4607  | 6032  | IPF6032   | UNCLASSIFIED PROTEINS                                                                        |                                  |
| CA5170 | 1.0 | 1.0 | 1.0 | 1.0 | 1.0 | 1.1 | PDC12.EXON: | 15640027..Pyruvate decarboxylase I, exon 2               | orf19.4608  | 6036  | CaPDC12   | C-compound and carbohydrate metabolism ENERGY SUBCELLULAR LOCALISATION                       |                                  |
| CA5171 | 1.0 | 1.0 | 0.9 | 0.9 | 1.0 | 1.0 | IPF6037     | 15642439..Similar to Legionella pneumophila              | orf19.4609  | 6037  | IPF6037   | UNCLASSIFIED PROTEINS                                                                        | molecular_function unknown       |
| CA5172 | 1.0 | 1.0 | 1.0 | 0.9 | 1.0 | 1.0 | CPS2.5F     | 15643464..Carboxypeptidase YSCS precursor                | orf19.4610  | 6038  | CaCPS2.5F | PROTEIN FATE [folding modification destination] ""SUBCELLULAR LOCALISATION                   |                                  |
| CA5173 | 1.0 | 0.9 | 1.0 | 1.0 | 0.9 | 1.0 | CPS2.3F     | 15644533..Carboxypeptidase YSCS precursor, 3-prime e     |             | 18130 | CaCPS2.3F | PROTEIN FATE [folding modification destination] ""SUBCELLULAR LOCALISATION                   |                                  |
| CA5174 | 1.0 | 1.0 | 1.0 | 0.9 | 1.0 | 0.9 | PRS4        | 15645480..Ribose-phosphate pyrophosphokir                | orf19.4611  | 6040  | CaPRS4    | Nucleotide metabolism Purine ribonucleotide metabolism                                       | transferase activity             |

|        |     |     |     |     |     |     |              |                                                            |                  |                                                                                           |                                        |
|--------|-----|-----|-----|-----|-----|-----|--------------|------------------------------------------------------------|------------------|-------------------------------------------------------------------------------------------|----------------------------------------|
| CA5175 | 1.0 | 1.0 | 1.0 | 1.0 | 0.9 | 0.9 | IPF6041      | complemer Similar to Legionella pneumophila orf19.4612     | 6041 IPF6041     | UNCLASSIFIED PROTEINS                                                                     |                                        |
| CA5176 | 1.0 | 1.0 | 1.0 | 1.0 | 1.0 | 1.0 | IPF6045      | complemer unknown function orf19.4614                      | 6045 IPF6045     | UNCLASSIFIED PROTEINS                                                                     | molecular_function unknown             |
| CA5177 | 1.0 | 1.0 | 0.9 | 1.0 | 0.9 | 0.9 | IPF111101    | 15653368..Weak similarity to C. cerevisiae hy orf19.4615   | 11101 IPF11101   | UNCLASSIFIED PROTEINS                                                                     | molecular_function unknown             |
| CA5178 | 1.0 | 0.9 | 1.0 | 1.0 | 1.0 | 1.0 | POL30        | complemer Proliferating Cell Nuclear Antigen (orf19.4616   | 20027 CaPOL30    | CELL CYCLE AND DNA PROCESSING SUBCELLULAR LOCALISATION                                    | nucleotidyltransferase activity        |
| CA5179 | 1.0 | 1.0 | 1.0 | 0.9 | 0.9 | 0.9 | MAK3         | complemer N-acetyltransferase (by homology) orf19.4617     | 11098 CaMAK3     | PROTEIN FATE [folding modification destination] ""SUBCELLULAR LOC                         | transferase activity                   |
| CA5180 | 0.9 | 0.9 | 2.1 | 1.5 | 1.4 | 1.2 | FBA1         | 15657313..fructose-bisphosphate aldolase (by orf19.4618    | 11096 CaFBA1     | C-compound and carbohydrate metabolism ENERGY SUBCELLULAR L                               | lyase activity                         |
| CA5181 | 1.1 | 1.1 | 1.0 | 1.0 | 0.9 | 0.9 | TIM12        | complemer subunit of the TIM22-complex (by orf19.4620      | 11094 CaTIM12    | PROTEIN FATE [folding modification destination] ""CELLULAR TRANSP                         | transporter activity                   |
| CA5182 | 1.0 | 1.0 | 1.0 | 1.0 | 1.0 | 1.1 | IPF11093     | 15659318..weak similarity to pig tubulin-tyrosi orf19.4621 | 11093 IPF11093   | UNCLASSIFIED PROTEINS                                                                     | molecular_function unknown             |
| CA5183 | 1.1 | 1.1 | 1.0 | 1.0 | 1.0 | 1.1 | IPF11090.EXC | 15662288..weak similarity to glutenin, exon 1 orf19.4622   | 11090 IPF11090.ε | UNCLASSIFIED PROTEINS                                                                     | molecular_function unknown             |
| CA5184 | 1.1 | 1.0 | 1.0 | 1.0 | 1.1 | 1.0 | IPF11090.EXC | 15663575..weak similarity to glutenin, exon 2              | 11086 IPF11090.ε | No significant S.c. match                                                                 |                                        |
| CA5185 | 1.0 | 1.0 | 1.2 | 1.1 | 1.0 | 1.1 | NHP6A        | 15666811..nonhistone chromosomal protein related to H      | 10163 CaNHP6A    | CELL FATE SUBCELLULAR LOCALISATION                                                        | DNA binding                            |
| CA5186 | 1.1 | 1.2 | 1.0 | 1.1 | 1.1 | 1.2 | HRT2         | 15668014..Similar to ScHRT2 (by homology) orf19.4624       | 10162 CaHRT2     | CLASSIFICATION NOT YET CLEAR-CUT                                                          | molecular_function unknown             |
| CA5187 | 1.0 | 1.0 | 0.9 | 0.9 | 1.0 | 1.0 | TOA2         | complemer TFIIA subunit 13.5 kD (by homolog orf19.4625     | 10160 CaTOA2     | TRANSCRIPTION SUBCELLULAR LOCALISATION                                                    | transcription regulator activity       |
| CA5188 | 1.1 | 1.1 | 1.0 | 1.0 | 1.0 | 1.0 | TAP42        | 15670275..Component of the Tor signaling pa orf19.4626     | 10159 CaTAP42    | CELL CYCLE AND DNA PROCESSING PROTEIN SYNTHESIS CELLU                                     | protein binding                        |
| CA5189 | 1.2 | 1.1 | 1.1 | 0.9 | 1.1 | 1.0 | IPF10158     | complemer Weak similarity to ScNup12p orf19.4627           | 10158 IPF10158   | TRANSCRIPTION CELLULAR TRANSPORT AND TRANSPORT MECH                                       | structural molecule activity           |
| CA5190 | 1.1 | 1.0 | 1.0 | 1.0 | 1.0 | 1.0 | IPF10155     | 15675194..unknown function orf19.4628                      | 10155 IPF10155   | UNCLASSIFIED PROTEINS                                                                     | molecular_function unknown             |
| CA5191 | 0.9 | 0.9 | 1.1 | 0.9 | 0.9 | 1.0 | IPF19538     | complemer partially similar to Isocitrate dehydrogenase (h | 19538 IPF19538   | C-compound and carbohydrate metabolism ENERGY TRANSCRIPTION SUBCELLULAR LOCALISATION      |                                        |
| CA5192 | 0.9 | 1.0 | 1.0 | 1.1 | 0.9 | 1.0 | HOK          | 15690495..unknown function orf19.7004                      | 17447 CaHOK      | No significant S.c. match                                                                 |                                        |
| CA5194 | 1.0 | 1.0 | 0.9 | 1.0 | 1.0 | 1.0 | IPF11756     | 15695156..unknown function orf19.7006                      | 11756 IPF11756   | No significant S.c. match                                                                 |                                        |
| CA5195 | 1.1 | 1.0 | 1.0 | 1.1 | 1.0 | 1.0 | GRP8         | complemer Similarity to dihydroflavonol-4-redu orf19.7009  | 2336 CaGRP8      | Metabolism of vitamins cofactors and prosthetic groups                                    |                                        |
| CA5196 | 1.0 | 0.9 | 1.0 | 1.0 | 1.0 | 1.0 | IPF2338      | 15706958..unknown function orf19.7010                      | 2338 IPF2338     | UNCLASSIFIED PROTEINS                                                                     | molecular_function unknown             |
| CA5197 | 1.1 | 1.0 | 1.0 | 1.0 | 0.9 | 1.0 | IPF2342      | 15708991..unknown function orf19.7011                      | 2342 IPF2342     | UNCLASSIFIED PROTEINS                                                                     | molecular_function unknown             |
| CA5198 | 0.9 | 1.0 | 1.0 | 1.0 | 0.9 | 1.0 | LPA4         | 15712803..Similar to ribosomal protein S16, norf19.7012    | 2343 CaLPA4      | PROTEIN SYNTHESIS SUBCELLULAR LOCALISATION                                                | structural molecule activity           |
| CA5199 | 1.0 | 1.0 | 0.9 | 1.1 | 1.1 | 1.0 | IPF2334      | complemer unknown function orf19.7013                      | 2344 IPF2334     | CELL CYCLE AND DNA PROCESSING SUBCELLULAR LOCALISATION                                    |                                        |
| CA5200 | 1.1 | 1.2 | 0.9 | 1.2 | 0.8 | 1.1 | RPL10E       | complemer Ribosomal protein L10, cytosolic (lorf19.7015    | 2347 CaRPL10E    | PROTEIN SYNTHESIS SUBCELLULAR LOCALISATION                                                | structural molecule activity           |
| CA5201 | 1.1 | 1.0 | 1.1 | 1.2 | 1.1 | 1.1 | IPF2349      | complemer similar to human sphingomyelin orf19.7016        | 2349 IPF2349     | Lipid fatty-acid and isoprenoid metabolism                                                | hydrolase activity                     |
| CA5202 | 0.9 | 0.9 | 1.0 | 1.0 | 1.0 | 1.0 | YOX1         | 15721529..Similar to homoeodomain protein (orf19.7017      | 2351 CaYOX1      | TRANSCRIPTION SUBCELLULAR LOCALISATION                                                    | DNA binding                            |
| CA5203 | 1.0 | 1.0 | 0.9 | 0.8 | 1.1 | 1.1 | RPS18        | complemer Ribosomal protein S18 (by homol orf19.7018       | 2353 CaRPS18     | PROTEIN SYNTHESIS SUBCELLULAR LOCALISATION                                                | structural molecule activity           |
| CA5204 | 1.0 | 1.0 | 1.0 | 1.0 | 0.9 | 1.0 | YML6         | complemer Ribosomal protein, mitochondrial ( orf19.7019    | 2354 CaYML6      | PROTEIN SYNTHESIS SUBCELLULAR LOCALISATION                                                | structural molecule activity           |
| CA5205 | 1.0 | 1.0 | 0.9 | 0.9 | 1.1 | 1.0 | KEX1         | complemer Carboxypeptidase-alpha (by homo orf19.7020       | 2356 CaKEX1      | PROTEIN FATE [folding modification destination] ""SUBCELLULAR LOC                         | peptidase activity                     |
| CA5206 | 0.7 | 0.7 | 2.6 | 2.5 | 1.7 | 2.9 | GPH1         | complemer Glycogen phosphorylase (by hom orf19.7021        | 2357 CaGPH1      | C-compound and carbohydrate metabolism ENERGY SUBCELLULAR L                               | transferase activity                   |
| CA5207 | 0.9 | 1.0 | 1.0 | 1.0 | 1.0 | 1.0 | IPF2359      | 15735088..unknown function orf19.7022                      | 2359 IPF2359     | No significant S.c. match                                                                 |                                        |
| CA5208 | 0.9 | 1.0 | 1.0 | 1.0 | 0.9 | 0.9 | IPF2361      | 15736314..unknown function orf19.7023                      | 2361 IPF2361     | UNCLASSIFIED PROTEINS                                                                     | molecular_function unknown             |
| CA5209 | 1.0 | 1.0 | 1.0 | 1.0 | 0.9 | 1.0 | MCM1         | 15738758..Transcription factor of the MADS b orf19.7025    | 2363 CaMCM1      | Amino acid metabolism Nitrogen and sulphur metabolism C-compound                          | DNA binding                            |
| CA5210 | 1.0 | 1.0 | 1.0 | 0.9 | 1.0 | 1.0 | IPF2373      | 15748251..unknown function orf19.7027                      | 2373 IPF2373     | No significant S.c. match                                                                 |                                        |
| CA5211 | 1.0 | 0.8 | 1.0 | 0.9 | 1.1 | 1.1 | IPF18125     | 15750117..similar to glutenin and glutamine-ri orf19.7028  | 18125 IPF18125   | No significant S.c. match                                                                 |                                        |
| CA5212 | 1.0 | 1.0 | 1.0 | 1.1 | 1.2 | 1.0 | IPF3050      | complemer unknown function orf19.7029                      | 3050 IPF3050     | CLASSIFICATION NOT YET CLEAR-CUT                                                          | hydrolase activity                     |
| CA5213 | 1.0 | 1.0 | 1.0 | 1.0 | 1.0 | 1.1 | SSR1         | complemer Secretory Stress Response protein orf19.7030     | 3054 CaSSR1      | No significant S.c. match                                                                 | structural molecule activity           |
| CA5214 | 1.0 | 0.9 | 1.0 | 1.1 | 1.2 | 1.1 | IPF19807     | complemer unknown function orf19.7032                      | 19807 IPF19807   | Amino acid metabolism SUBCELLULAR LOCALISATION                                            |                                        |
| CA5215 | 1.0 | 1.0 | 1.0 | 1.1 | 0.9 | 0.9 | PPS1         | 15764307..protein tyrosine phosphatase (by h orf19.7033    | 3063 CaPPS1      | CELL CYCLE AND DNA PROCESSING                                                             | protein phosphatase activity           |
| CA5216 | 1.0 | 1.0 | 1.0 | 1.1 | 1.2 | 1.1 | IPF3069      | 15767764..unknown function orf19.7034                      | 3069 IPF3069     | No significant S.c. match                                                                 |                                        |
| CA5217 | 1.0 | 1.0 | 1.1 | 1.0 | 1.1 | 0.9 | RFC2         | complemer Replication factor (by homology) orf19.7035      | 3070 CaRFC2      | CELL CYCLE AND DNA PROCESSING SUBCELLULAR LOCALISATION                                    | DNA binding                            |
| CA5218 | 0.9 | 1.0 | 0.9 | 1.0 | 1.0 | 1.0 | WHI2         | complemer Growth regulation factor (by homo orf19.7036     | 3073 CaWHI2      | CELL FATE                                                                                 | enzyme regulator activity              |
| CA5219 | 1.0 | 1.2 | 1.0 | 1.0 | 1.0 | 1.1 | YAE1         | 15773683..Essential protein essential Y orf19.7037         | 3074 CaYAE1      | UNCLASSIFIED PROTEINS                                                                     | molecular_function unknown             |
| CA5220 | 1.0 | 1.1 | 1.0 | 0.9 | 0.9 | 1.0 | MVP1.EXON2   | complemer Required for vacuolar protein sorti orf19.7038   | 3075 CaMVP1.e    | PROTEIN FATE [folding modification destination] ""CELLULAR TRANSP                         | molecular_function unknown             |
| CA5221 | 1.0 | 1.0 | 1.0 | 1.0 | 1.0 | 1.1 | MVP1.EXON1   | complemer Required for vacuolar protein sorti orf19.7039   | 3076 CaMVP1.e    | PROTEIN FATE [folding modification destination] ""CELLULAR TRANSPORT AND TRANSPORT MECHAN |                                        |
| CA5222 | 1.1 | 1.1 | 1.0 | 1.0 | 1.0 | 1.0 | IPF3079      | complemer similar to Saccharomyces cerevisi orf19.7041     | 3079 IPF3079     | TRANSCRIPTION SUBCELLULAR LOCALISATION                                                    | RNA binding                            |
| CA5223 | 1.1 | 1.1 | 1.0 | 1.1 | 1.1 | 1.1 | IPF3080      | complemer unknown function (by homology) orf19.7042        | 3080 IPF3080     | No significant S.c. match                                                                 |                                        |
| CA5224 | 0.9 | 1.0 | 1.0 | 1.1 | 0.9 | 1.1 | IPF3081      | 15783003..unknown function orf19.7043                      | 3081 IPF3081     | UNCLASSIFIED PROTEINS                                                                     | molecular_function unknown             |
| CA5225 | 1.0 | 1.0 | 1.0 | 1.0 | 1.0 | 1.0 | ACB1.EXON2   | complemer acyl-coenzyme-A-binding protein, exon 2 (by i    | 3082 CaACB1.e    | Lipid fatty-acid and isoprenoid metabolism                                                | transporter activity                   |
| CA5226 | 1.1 | 1.0 | 0.9 | 1.0 | 1.0 | 1.0 | RIM15        | complemer Protein kinase involved in the RIM orf19.7044    | 3086 CaRIM15     | TRANSCRIPTION ""PROTEIN FATE [folding modification destination] ""                        | protein kinase activity                |
| CA5227 | 1.1 | 1.0 | 0.9 | 1.1 | 1.0 | 1.1 | IPF3087      | complemer unknown function orf19.7046                      | 3087 IPF3087     | Amino acid metabolism Nitrogen and sulphur metabolism TRANSCRIPT                          | DNA binding                            |
| CA5228 | 1.1 | 1.1 | 1.1 | 1.1 | 1.0 | 1.1 | RTF1.3EOC    | complemer Regulates DNA binding properties orf19.7047      | 3088 CaRTF1.3e   | TRANSCRIPTION SUBCELLULAR LOCALISATION                                                    | transcription regulator activity       |
| CA5229 | 1.0 | 1.0 | 0.9 | 1.0 | 1.1 | 0.9 | IPF10425     | 15795157..unknown function orf19.5035                      | 10425 IPF10425   | CELL CYCLE AND DNA PROCESSING TRANSCRIPTION                                               | transcription regulator activity       |
| CA5230 | 1.1 | 0.9 | 1.1 | 1.0 | 1.1 | 1.0 | IPF10424     | complemer unknown function orf19.5034                      | 10424 IPF10424   | UNCLASSIFIED PROTEINS                                                                     | molecular_function unknown             |
| CA5231 | 1.0 | 1.1 | 1.0 | 1.1 | 1.0 | 1.0 | IPF10422     | 15799197..Similar to APG12, component of t orf19.5033      | 10422 IPF10422   | PROTEIN FATE [folding modification destination] ""CONTROL OF CELL                         | molecular_function unknown             |
| CA5232 | 1.0 | 1.0 | 1.0 | 1.0 | 1.2 | 1.0 | SUN42        | complemer Putative cell wall beta-glucosidase orf19.5032   | 10421 CaSUN42    | CELL CYCLE AND DNA PROCESSING CELL FATE                                                   |                                        |
| CA5233 | 0.9 | 1.0 | 1.2 | 1.1 | 1.0 | 1.1 | SSK1         | complemer Putative reponse regul ssk1p [Can orf19.5031     | 3012 CaSSK1      | C-compound and carbohydrate metabolism ""CELL RESCUE DEFENSE                              | signal transducer activity, transcript |
| CA5234 | 1.2 | 1.2 | 0.9 | 1.0 | 1.1 | 1.1 | IPF3014      | complemer weak similarity to S. cerevisiae DC orf19.5030   | 3014 IPF3014     | UNCLASSIFIED PROTEINS                                                                     | molecular_function unknown             |
| CA5235 | 1.1 | 1.1 | 1.0 | 1.1 | 1.2 | 1.1 | IPF3015      | 15809952..Similar to E.coli modF and photore orf19.5029    | 3015 IPF3015     | CELL CYCLE AND DNA PROCESSING                                                             | transporter activity, hydrolase activi |
| CA5236 | 1.1 | 1.1 | 1.0 | 1.0 | 1.0 | 1.1 | LCB2         | 15812272..Palmitoyl transferase (by homolog orf19.5027     | 3017 CaLCB2      | Lipid fatty-acid and isoprenoid metabolism                                                | transferase activity                   |
| CA5237 | 1.0 | 1.0 | 1.0 | 1.0 | 1.0 | 1.0 | ZMS1         | 15818471..Zinc Finger Protein C2H2 (by hom orf19.5026      | 3021 CaZMS1      | TRANSCRIPTION                                                                             | molecular_function unknown             |
| CA5238 | 1.0 | 1.0 | 1.0 | 1.0 | 1.0 | 1.0 | MET3         | complemer ATP sulfurylase ATP sulfury orf19.5025           | 3022 CaMET3      | Amino acid metabolism Nitrogen and sulphur metabolism                                     | nucleotidyltransferase activity        |
| CA5239 | 1.1 | 1.0 | 1.1 | 1.2 | 1.1 | 1.1 | GND1         | 15827975..6-phosphogluconate di6-phospho orf19.5024        | 3028 CaGND1      | C-compound and carbohydrate metabolism ENERGY SUBCELLULAR L                               | oxidoreductase activity                |
| CA5240 | 1.2 | 1.1 | 1.0 | 1.0 | 1.2 | 1.0 | IPF3032      | 15830354..allantoate permease (by homology orf19.5023      | 3032 IPF3032     | TRANSPORT FACILITATION                                                                    |                                        |
| CA5241 | 1.0 | 1.0 | 1.0 | 1.0 | 0.9 | 1.1 | SMF3         | complemer Probable manganese transporter (orf19.5022       | 3034 CaSMF3      | PROTEIN FATE [folding modification destination] ""CELLULAR TRANSPORT AND TRANSPORT MECHAN |                                        |
| CA5242 | 1.1 | 1.1 | 1.0 | 1.2 | 1.5 | 1.2 | PDX1         | 15835165..Pyruvate dehydrogenase complex orf19.5021        | 3038 CaPDX1      | C-compound and carbohydrate metabolism ENERGY SUBCELLULAR L                               | protein binding                        |
| CA5243 | 0.9 | 0.9 | 1.1 | 1.0 | 1.1 | 1.0 | IPF3040      | 15836861..unknown function orf19.5020                      | 3040 IPF3040     | No significant S.c. match                                                                 |                                        |
| CA5244 | 0.9 | 0.9 | 0.9 | 0.9 | 1.0 | 1.0 | IPF3043      | complemer unknown function orf19.5019                      | 3043 IPF3043     | No significant S.c. match                                                                 |                                        |
| CA5245 | 1.0 | 1.0 | 1.0 | 1.0 | 1.1 | 1.0 | DUR32        | 15841924..Urea transport protein (by homolog orf19.5017    | 3048 CaDUR32     | REGULATION OF INTERACTION WITH CELLULAR ENVIRONMENT SUBCELLULAR LOCALISATION TF           |                                        |
| CA5246 | 1.0 | 1.0 | 1.0 | 1.0 | 1.0 | 1.0 | IPF19808     | 15844117..unknown function orf19.5016                      | 19808 IPF19808   | No significant S.c. match                                                                 |                                        |
| CA5247 | 1.0 | 0.9 | 1.0 | 1.1 | 1.0 | 1.0 | MYO2         | complemer Myosin heavy chain (by homology orf19.5015       | 13531 CaMYO2     | CELLULAR TRANSPORT AND TRANSPORT MECHANISMS CELL FA1                                      | motor activity                         |

|        |     |     |     |     |     |     |             |                                                            |            |       |            |                                                                                            |                                     |
|--------|-----|-----|-----|-----|-----|-----|-------------|------------------------------------------------------------|------------|-------|------------|--------------------------------------------------------------------------------------------|-------------------------------------|
| CA5248 | 1.0 | 1.0 | 1.0 | 0.9 | 1.0 | 1.0 | IPF1828     | 15851987..unknown function                                 | orf19.5014 | 1828  | IPF1828    | UNCLASSIFIED PROTEINS                                                                      | molecular_function unknown          |
| CA5249 | 0.9 | 1.0 | 1.0 | 1.0 | 1.0 | 1.0 | PCM1        | complemer phosphoacetylglucosamine mutas                   | orf19.5013 | 1827  | CaPCM1     | C-compound and carbohydrate metabolism                                                     | isomerase activity                  |
| CA5250 | 1.0 | 0.9 | 1.0 | 1.0 | 1.0 | 0.9 | IPF1826     | 15854644..unknown function                                 | orf19.5012 | 1826  | IPF1826    | No significant S.c. match                                                                  |                                     |
| CA5251 | 1.0 | 1.1 | 1.0 | 1.0 | 1.0 | 1.0 | IPF1824     | complemer unknown function                                 | orf19.5011 | 1824  | IPF1824    | CELL CYCLE AND DNA PROCESSING SUBCELLULAR LOCALISATION                                     | molecular_function unknown          |
| CA5252 | 1.0 | 0.9 | 1.0 | 0.9 | 1.0 | 1.0 | DIM1        | 15858440..rRNA (adenine-N6,N6)-dimethyltr                  | orf19.5010 | 1822  | CaDIM1     | TRANSCRIPTION SUBCELLULAR LOCALISATION                                                     | transferase activity                |
| CA5253 | 1.0 | 1.0 | 1.0 | 1.0 | 1.0 | 1.1 | KEL3        | complemer Kelch-repeat protein                             | orf19.5009 | 1821  | CaKEL3     | UNCLASSIFIED PROTEINS                                                                      | molecular_function unknown          |
| CA5254 | 1.0 | 1.0 | 1.1 | 1.0 | 1.0 | 0.9 | IPF1820     | 15861698..unknown function                                 |            | 1820  | IPF1820    | UNCLASSIFIED PROTEINS                                                                      | structural molecule activity        |
| CA5255 | 1.2 | 0.8 | 1.1 | 1.2 | 1.0 | 1.1 | ACT1        | complemer actin (by homology)                              | orf19.5007 | 1819  | CaACT1     | CELL CYCLE AND DNA PROCESSING CELLULAR TRANSPORT AND                                       | structural molecule activity        |
| CA5257 | 1.1 | 0.9 | 0.9 | 0.9 | 1.0 | 0.9 | SNC2.EXON2  | 15865513..Strong similarity to synaptobrevin, exon 2 (by   |            | 1811  | CaSNC2.e   | PROTEIN FATE [folding modification destination] ""CELLULAR TRANSP                          | transporter activity                |
| CA5258 | 1.0 | 1.0 | 1.1 | 1.0 | 1.0 | 1.1 | GCV3        | 15866499..Glycine decarboxylase, subunit H                 | orf19.5006 | 1809  | CaGCV3     | Amino acid metabolism SUBCELLULAR LOCALISATION                                             | oxidoreductase activity             |
| CA5259 | 1.0 | 1.0 | 1.0 | 0.9 | 0.9 | 1.0 | OSM2        | complemer Osmotic growth protein (by homolo                | orf19.5005 | 1808  | CaOSM2     | ENERGY ""CELL RESCUE DEFENSE AND VIRULENCE ""SUBCELLULAR LOCALISATION                      |                                     |
| CA5260 | 1.0 | 1.0 | 1.0 | 1.0 | 1.1 | 0.9 | RAD54       | complemer DNA-dependent ATPase of the Snor                 | orf19.5004 | 1807  | CaRAD54    | CELL CYCLE AND DNA PROCESSING SUBCELLULAR LOCALISATION                                     | DNA binding                         |
| CA5261 | 1.0 | 1.0 | 1.0 | 1.1 | 1.0 | 1.1 | IPF1805     | 15872431..unknown function                                 | orf19.5003 | 1805  | IPF1805    | UNCLASSIFIED PROTEINS                                                                      | enzyme regulator activity,protein b |
| CA5262 | 1.0 | 1.0 | 1.1 | 1.1 | 1.0 | 1.1 | IPF1804     | complemer putative transcription factor (by ho             | orf19.5001 | 1804  | IPF1804    | TRANSCRIPTION REGULATION OF/INTERACTION WITH CELLULAR                                      | transcription regulator activity    |
| CA5263 | 1.1 | 1.1 | 1.0 | 1.0 | 1.0 | 1.0 | CYB3        | complemer Lactate dehydrogenase cytochrom                  | orf19.5000 | 1801  | CaCYB3     | C-compound and carbohydrate metabolism ENERGY SUBCELLULAR L                                | oxidoreductase activity             |
| CA5264 | 1.2 | 1.8 | 1.2 | 1.6 | 1.3 | 1.3 | IPF1798     | complemer unknown function                                 | orf19.4998 | 1798  | IPF1798    | Amino acid metabolism TRANSCRIPTION SUBCELLULAR LOCALISATION                               |                                     |
| CA5265 | 1.0 | 1.1 | 1.0 | 0.9 | 1.0 | 1.1 | IPF1792     | 15885491..unknown function                                 | orf19.4997 | 1792  | IPF1792    | C-compound and carbohydrate metabolism TRANSCRIPTION                                       |                                     |
| CA5266 | 1.0 | 1.0 | 1.1 | 1.0 | 1.0 | 1.0 | IPF1787.3F  | complemer unknown function, 3-prime end                    | orf19.4996 | 1789  | IPF1787.3f | UNCLASSIFIED PROTEINS                                                                      | molecular_function unknown          |
| CA5267 | 0.9 | 1.0 | 1.1 | 1.0 | 1.0 | 1.1 | IPF1787.5F  | complemer unknown function, 5-prime end                    | orf19.4995 | 1787  | IPF1787.5f | No significant S.c. match                                                                  |                                     |
| CA5268 | 1.1 | 1.0 | 1.0 | 1.0 | 1.0 | 1.0 | SEC18.3F    | complemer vesicular fusion protein, 3-prime e              | orf19.4994 | 1786  | CaSEC18.i  | CELLULAR TRANSPORT AND TRANSPORT MECHANISMS SUBCELL                                        | hydrolase activity                  |
| CA5270 | 1.0 | 1.1 | 1.1 | 1.0 | 0.9 | 1.0 | SEC18.5F    | complemer vesicular fusion protein by homolo               | orf19.4993 | 1784  | CaSEC18.i  | CELLULAR TRANSPORT AND TRANSPORT MECHANISMS SUBCELLULAR LOCALISATION                       |                                     |
| CA5271 | 1.0 | 1.0 | 1.0 | 1.0 | 1.0 | 1.0 | IPF1777     | complemer similar to Saccharomyces cerevisi                | orf19.4991 | 1777  | IPF1777    | CELL CYCLE AND DNA PROCESSING ""CELL RESCUE DEFENSE A                                      | RNA binding                         |
| CA5272 | 1.0 | 0.9 | 1.0 | 0.9 | 1.0 | 1.0 | IPF1770     | complemer unknown function                                 | orf19.4988 | 1770  | IPF1770    | No significant S.c. match                                                                  |                                     |
| CA5273 | 0.9 | 0.9 | 1.0 | 1.1 | 0.9 | 1.0 | NUP49       | 15905616..nuclear pore protein (by homology                | orf19.4987 | 1766  | CaNUP49    | TRANSCRIPTION CELLULAR TRANSPORT AND TRANSPORT MECH                                        | structural molecule activity        |
| CA5274 | 1.0 | 1.0 | 1.0 | 1.0 | 1.0 | 1.0 | IPF1764     | complemer similar to Saccharomyces cerevisi                | orf19.4985 | 1764  | IPF1764    | TRANSPORT FACILITATION                                                                     | transporter activity                |
| CA5275 | 1.1 | 1.0 | 1.1 | 1.0 | 0.9 | 1.0 | IPF1760.3F  | complemer unknown function, 3-prime end                    | orf19.1245 | 1760  | IPF1760.3f | C-compound and carbohydrate metabolism                                                     |                                     |
| CA5276 | 0.9 | 1.1 | 1.1 | 1.1 | 1.0 | 1.1 | IPF1759.53F | complemer unknown function, similar to endochitinases, ir  |            | 1759  | IPF1759.5f | No significant S.c. match                                                                  |                                     |
| CA5277 | 1.0 | 0.9 | 1.0 | 1.0 | 1.0 | 1.1 | CTA29.EXON  | 15918562..Protein with putative transcription              | orf19.7127 | 1892  | CaCTA29.e  | No significant S.c. match                                                                  |                                     |
| CA5278 | 1.0 | 1.1 | 0.5 | 0.5 | 0.6 | 0.6 | CTA29.EXON  | 15919539..Protein with putative transcription activation d |            | 1893  | CaCTA29.e  | No significant S.c. match                                                                  |                                     |
| CA5279 | 0.9 | 1.1 | 1.0 | 1.0 | 1.0 | 1.0 | SYS1        | 15920247..Similar to ypt6 suppressor in S. ce              | orf19.7128 | 1895  | CaSYS1     | CELLULAR TRANSPORT AND TRANSPORT MECHANISMS                                                | molecular_function unknown          |
| CA5280 | 1.0 | 1.1 | 0.9 | 0.9 | 1.0 | 1.1 | IPF1899     | 15921443..unknown function                                 | orf19.7131 | 1899  | IPF1899    | UNCLASSIFIED PROTEINS                                                                      | molecular_function unknown          |
| CA5281 | 1.0 | 1.0 | 0.9 | 1.0 | 1.0 | 0.9 | SPT6        | complemer Transcription elongation protein (b              | orf19.7136 | 1910  | CaSPT6     | CELL CYCLE AND DNA PROCESSING TRANSCRIPTION SUBCELLUL                                      | transcription regulator activity    |
| CA5282 | 1.0 | 1.0 | 1.0 | 1.0 | 1.0 | 1.0 | IPF1911     | complemer unknown function                                 | orf19.7139 | 1911  | IPF1911    | No significant S.c. match                                                                  |                                     |
| CA5283 | 1.1 | 1.0 | 1.1 | 0.9 | 1.1 | 1.0 | IPF1912     | 15927356..putative catechol o-methyltransfe                | orf19.7140 | 1912  | IPF1912    | No significant S.c. match                                                                  |                                     |
| CA5284 | 0.9 | 1.0 | 1.0 | 1.1 | 0.9 | 1.0 | UFE1        | 15928155..Endoplasmic reticulum t-SNARE (l                 | orf19.7141 | 1914  | CaUFE1     | CELLULAR TRANSPORT AND TRANSPORT MECHANISMS CELL FA                                        | transporter activity                |
| CA5285 | 1.0 | 1.0 | 1.0 | 1.0 | 1.0 | 1.0 | HBS1.3F     | complemer Translation elongation factor eEF-               | orf19.7144 | 1918  | CaHBS1.3f  | PROTEIN SYNTHESIS SUBCELLULAR LOCALISATION                                                 | molecular_function unknown          |
| CA5287 | 1.1 | 1.0 | 1.0 | 1.0 | 1.1 | 1.0 | IPF1922     | complemer similar to multidrug resistance prot             | orf19.7148 | 1922  | IPF1922    | CELL RESCUE DEFENSE AND VIRULENCE ""TRANSPORT FACILITATION                                 |                                     |
| CA5288 | 1.1 | 1.1 | 1.0 | 1.2 | 1.1 | 1.2 | IPF1928     | 15935369..unknown function                                 | orf19.7149 | 1928  | IPF1928    | UNCLASSIFIED PROTEINS                                                                      | molecular_function unknown          |
| CA5289 | 1.1 | 1.1 | 1.1 | 1.1 | 1.0 | 1.1 | NRG1        | complemer similar to transcription Nrg1 [Canc              | orf19.7150 | 1932  | CaNRG1     | UNCLASSIFIED PROTEINS                                                                      | transcription regulator activity    |
| CA5290 | 1.0 | 1.1 | 1.1 | 1.4 | 1.0 | 1.1 | IPF1943     | 15953097..similar to Aspergillus (Emericella)              | orf19.7152 | 1943  | IPF1943    | Amino acid metabolism                                                                      |                                     |
| CA5291 | 1.0 | 1.0 | 1.1 | 1.0 | 1.0 | 1.0 | LOS1        | 15954470..pre-tRNA splicing protein (by hom                | orf19.7153 | 1945  | CaLOS1     | TRANSCRIPTION SUBCELLULAR LOCALISATION                                                     | RNA binding,protein binding         |
| CA5292 | 1.0 | 1.1 | 1.0 | 1.0 | 1.0 | 1.0 | IPF1948     | 15957726..unknown function                                 | orf19.7154 | 1948  | IPF1948    | UNCLASSIFIED PROTEINS                                                                      | molecular_function unknown          |
| CA5293 | 1.0 | 1.0 | 1.0 | 1.0 | 1.0 | 0.9 | FAA24       | complemer Long-chain-fatty-acid--CoA ligase                | orf19.7156 | 1949  | CaFAA24    | Lipid fatty-acid and isoprenoid metabolism ""CELLULAR TRANSPORT AND TRANSPORT MECHANISMS   |                                     |
| CA5294 | 0.9 | 0.9 | 1.0 | 0.9 | 0.9 | 1.0 | IPF1952     | complemer unknown function                                 | orf19.7157 | 1952  | IPF1952    | No significant S.c. match                                                                  |                                     |
| CA5295 | 1.0 | 0.9 | 0.9 | 1.0 | 1.1 | 0.9 | IPF1954     | complemer putative transporter (by homology)               | orf19.7158 | 1954  | IPF1954    | TRANSPORT FACILITATION                                                                     |                                     |
| CA5296 | 1.0 | 1.1 | 1.0 | 1.0 | 1.0 | 0.9 | IPF1956     | complemer unknown function                                 | orf19.7159 | 1956  | IPF1956    | UNCLASSIFIED PROTEINS                                                                      | molecular_function unknown          |
| CA5297 | 1.0 | 0.9 | 1.1 | 1.0 | 1.0 | 1.1 | YAR1        | 15967930..Ankyrin repeat-containing protein                | orf19.7160 | 1957  | CaYAR1     | CELL CYCLE AND DNA PROCESSING                                                              | molecular_function unknown          |
| CA5298 | 1.0 | 1.0 | 1.0 | 0.9 | 0.9 | 1.0 | SUI3        | 15968805..Translation initiation factor eIF2 be            | orf19.7161 | 19809 | CaSUI3     | PROTEIN SYNTHESIS SUBCELLULAR LOCALISATION                                                 | translation regulator activity      |
| CA5299 | 1.0 | 1.0 | 1.0 | 0.9 | 1.1 | 0.9 | IPF2190     | complemer putative serine/threonine protein k              | orf19.7164 | 2190  | IPF2190    | CLASSIFICATION NOT YET CLEAR-CUT                                                           | protein kinase activity             |
| CA5300 | 1.1 | 1.1 | 1.0 | 1.1 | 1.0 | 1.0 | IPF2189     | 15971542..unknown function                                 | orf19.7165 | 2189  | IPF2189    | No significant S.c. match                                                                  |                                     |
| CA5301 | 1.1 | 1.0 | 1.1 | 1.0 | 1.0 | 0.9 | IPF2186     | 15973161..unknown function                                 | orf19.7166 | 2186  | IPF2186    | UNCLASSIFIED PROTEINS                                                                      |                                     |
| CA5302 | 1.0 | 1.1 | 1.0 | 1.1 | 1.0 | 1.1 | IPF20175    | 15975761..unknown function                                 | orf19.7167 | 20175 | IPF20175   | No significant S.c. match                                                                  |                                     |
| CA5303 | 0.9 | 0.9 | 1.0 | 1.0 | 1.0 | 1.0 | IPF2180     | 15977893..unknown function                                 | orf19.7170 | 2180  | IPF2180    | No significant S.c. match                                                                  |                                     |
| CA5304 | 1.2 | 0.9 | 0.9 | 0.9 | 0.9 | 0.9 | IPF2178     | complemer unknown function                                 | orf19.7173 | 2178  | IPF2178    | No significant S.c. match                                                                  |                                     |
| CA5305 | 1.0 | 1.0 | 0.9 | 0.9 | 1.0 | 1.0 | IPF2175     | complemer similar to Saccharomyces cerevisi                | orf19.7175 | 2175  | IPF2175    | PROTEIN FATE [folding modification destination]                                            | molecular_function unknown          |
| CA5306 | 0.9 | 1.0 | 1.0 | 1.0 | 1.0 | 0.9 | NPT1        | 15981895..Nicotinate phosphoribosyltransfe                 | orf19.7176 | 2173  | CaNPT1     | Metabolism of vitamins cofactors and prosthetic groups                                     | transferase activity                |
| CA5307 | 0.9 | 0.9 | 0.9 | 1.2 | 1.0 | 1.1 | IPF2172     | 15983406..similar to Saccharomyces cerevisi                | orf19.7177 | 2172  | IPF2172    | PROTEIN FATE [folding modification destination] ""CELLULAR TRANSP                          | structural molecule activity        |
| CA5308 | 1.1 | 1.0 | 1.0 | 1.0 | 1.0 | 1.1 | PRE5        | 15986569..20S proteasome subunit alpha6 (b                 | orf19.7178 | 2171  | CaPRE5     | PROTEIN FATE [folding modification destination] ""SUBCELLULAR LOC                          | peptidase activity                  |
| CA5309 | 1.1 | 1.0 | 0.9 | 1.0 | 0.9 | 1.0 | IPF2170     | complemer similar to saccharomyces cerevisi                | orf19.7179 | 2170  | IPF2170    | PROTEIN FATE [folding modification destination] ""CELLULAR TRANSPORT AND TRANSPORT MECHAN  |                                     |
| CA5310 | 1.0 | 1.0 | 1.0 | 1.0 | 1.0 | 1.0 | IPF2167     | complemer unknown function                                 | orf19.7181 | 2167  | IPF2167    | PROTEIN FATE [folding modification destination] ""SUBCELLULAR LOCALISATION                 |                                     |
| CA5311 | 0.9 | 1.0 | 1.0 | 0.9 | 1.0 | 1.0 | IPF2166     | 15991528..unknown function                                 | orf19.7182 | 2166  | IPF2166    | UNCLASSIFIED PROTEINS                                                                      | molecular_function unknown          |
| CA5312 | 1.0 | 1.0 | 0.9 | 1.0 | 1.1 | 0.9 | IPF2165     | complemer unknown function                                 | orf19.7183 | 2165  | IPF2165    | UNCLASSIFIED PROTEINS                                                                      | molecular_function unknown          |
| CA5313 | 0.9 | 1.1 | 1.0 | 1.0 | 1.1 | 1.0 | IPF2163     | 15993216..unknown function                                 | orf19.7184 | 2163  | IPF2163    | UNCLASSIFIED PROTEINS                                                                      |                                     |
| CA5314 | 1.0 | 1.0 | 1.0 | 0.9 | 0.9 | 1.0 | HAT2        | 15993846..Subunit of the major yeast histone               | orf19.7185 | 2161  | CaHAT2     | TRANSCRIPTION ""PROTEIN FATE [folding modification destination] ""SUBCELLULAR LOCALISATION |                                     |
| CA5315 | 1.1 | 1.0 | 1.0 | 1.0 | 1.0 | 0.9 | CYB2        | 15996981..B-type cyclin B-type cycl                        | orf19.7186 | 2159  | CaCYB2     | CELL CYCLE AND DNA PROCESSING                                                              | protein kinase activity,enzyme regi |
| CA5316 | 1.1 | 1.0 | 1.0 | 0.9 | 1.0 | 1.0 | MAM33       | 15998865..Mitochondrial acidic matrix protein              | orf19.7187 | 2157  | CaMAM33    | SUBCELLULAR LOCALISATION                                                                   | molecular_function unknown          |
| CA5317 | 1.2 | 1.1 | 0.9 | 0.7 | 0.9 | 1.2 | RPP1B       | 16000013..Acidic ribosomal protei 60S acidic               | orf19.7188 | 2156  | CaRPP1B    | PROTEIN SYNTHESIS SUBCELLULAR LOCALISATION                                                 |                                     |
| CA5318 | 1.0 | 1.0 | 1.0 | 1.0 | 1.0 | 1.0 | OGG1        | complemer 8-oxoguanine DNA glycosylase (b                  | orf19.7190 | 2154  | CaOGG1     | CELL CYCLE AND DNA PROCESSING SUBCELLULAR LOCALISATION                                     | DNA binding                         |
| CA5319 | 1.0 | 1.0 | 1.1 | 1.0 | 1.0 | 1.1 | IPF2150     | 16002602..similar to protein involved in ER fu             | orf19.7193 | 2150  | IPF2150    | Amino acid metabolism                                                                      | molecular_function unknown          |
| CA5320 | 0.9 | 1.0 | 1.0 | 0.9 | 1.0 | 1.0 | IPF2147     | 16004783..unknown function                                 | orf19.7194 | 2147  | IPF2147    | No significant S.c. match                                                                  |                                     |
| CA5321 | 1.0 | 1.0 | 1.0 | 1.0 | 1.1 | 0.9 | RAD6.3      | complemer Ubiquitin protein ligase RAD6 [Can               | orf19.7195 | 2145  | CaRAD6.3   | CELL CYCLE AND DNA PROCESSING TRANSCRIPTION ""PROTEIN FATE [folding modification destinati |                                     |
| CA5322 | 1.2 | 1.9 | 1.2 | 1.6 | 1.2 | 1.2 | PRB1        | complemer Protease B, vacuolar (by homology                | orf19.7196 | 2144  | CaPRB1     | PROTEIN FATE [folding modification destination] ""SUBCELLULAR LOC                          | peptidase activity                  |

|        |     |     |     |     |     |     |            |                                                       |            |       |           |                                                                                 |                                                 |
|--------|-----|-----|-----|-----|-----|-----|------------|-------------------------------------------------------|------------|-------|-----------|---------------------------------------------------------------------------------|-------------------------------------------------|
| CA5323 | 0.9 | 1.0 | 0.9 | 1.0 | 1.0 | 0.9 | IPF2142    | complemer unknown function                            | orf19.7197 | 2142  | IPF2142   | PROTEIN FATE [folding modification destination]                                 | protein binding                                 |
| CA5324 | 1.1 | 1.0 | 1.0 | 0.9 | 1.1 | 0.9 | IPF2140    | complemer unknown function                            | orf19.7198 | 2140  | IPF2140   | UNCLASSIFIED PROTEINS                                                           | molecular_function unknown                      |
| CA5325 | 1.0 | 0.9 | 1.0 | 0.9 | 1.0 | 1.0 | IPF2138    | 16013645..unknown function                            | orf19.7199 | 2138  | IPF2138   | UNCLASSIFIED PROTEINS                                                           | molecular_function unknown                      |
| CA5326 | 1.0 | 0.9 | 1.1 | 1.1 | 1.1 | 1.0 | IPF2137    | 16014422..unknown function                            | orf19.7200 | 2137  | IPF2137   | No significant S.c. match                                                       |                                                 |
| CA5327 | 1.1 | 1.0 | 1.0 | 1.0 | 1.1 | 1.0 | SLA2       | complemer Cytoskeleton assembly cytoskeleto           | orf19.7201 | 2136  | CaSLA2    | Nucleotide metabolism                                                           | structural molecule activity                    |
| CA5328 | 1.1 | 0.9 | 1.0 | 1.0 | 1.0 | 1.1 | RER1       | complemer Required for correct localization of        | orf19.7202 | 2132  | CaRER1    | PROTEIN FATE [folding modification destination]                                 | CONTROL OF CELL                                 |
| CA5329 | 0.9 | 1.0 | 1.0 | 1.0 | 1.1 | 1.0 | MRP7       | complemer Mitochondrial ribosomal protein Yr          | orf19.7203 | 2131  | CaMRP7    | PROTEIN SYNTHESIS SUBCELLULAR LOCALISATION                                      | structural molecule activity                    |
| CA5330 | 1.0 | 1.0 | 1.0 | 1.0 | 1.0 | 1.0 | IPF2130    | 16022187..similar to 2-nitropropane dioxygen          | orf19.7204 | 2130  | IPF2130   | Nitrogen and sulphur metabolism                                                 | molecular_function unknown                      |
| CA5331 | 1.0 | 1.0 | 1.0 | 1.0 | 1.0 | 1.2 | DUR33      | complemer Urea transport protein (by homolo           | orf19.7205 | 901   | CaDUR33   | REGULATION OF/INTERACTION WITH CELLULAR ENVIRONMENT SUBCELLULAR LOCALISATION TF |                                                 |
| CA5332 | 1.0 | 0.9 | 1.0 | 1.0 | 0.9 | 1.1 | IPF900.3   | 16026752..unknown function, 3-prime end               | orf19.7206 | 900   | IPF900.3  | UNCLASSIFIED PROTEINS                                                           | molecular_function unknown                      |
| CA5333 | 1.1 | 0.9 | 1.0 | 1.1 | 1.0 | 1.1 | DOA4       | complemer ubiquitin-specific isopeptidase (by         | orf19.7207 | 899   | CaDOA4    | PROTEIN FATE [folding modification destination]                                 | REGULATION OF/IN peptidase activity             |
| CA5334 | 0.9 | 1.0 | 1.0 | 0.9 | 0.9 | 1.0 | SMK1       | 16031171..MAP kinase (by homol mitogen-ac             | orf19.7208 | 895   | CaSMK1    | CELLULAR COMMUNICATION/SIGNAL TRANSDUCTION MECHANISM                            | protein kinase activity,signal trans            |
| CA5335 | 0.9 | 0.9 | 1.1 | 1.0 | 0.9 | 1.0 | IPF894     | 16032418..unknown function                            | orf19.7209 | 894   | IPF894    | CELL FATE SUBCELLULAR LOCALISATION PROTEIN ACTIVITY REGULATION                  |                                                 |
| CA5336 | 0.9 | 0.9 | 1.0 | 0.9 | 0.9 | 0.9 | IPF893     | 16033135..unknown function                            | orf19.7210 | 893   | IPF893    | UNCLASSIFIED PROTEINS                                                           | molecular_function unknown                      |
| CA5337 | 1.0 | 1.0 | 1.1 | 0.9 | 1.0 | 1.0 | APL1       | 16034302..AP-2 complex subunit, beta2-adap            | orf19.7212 | 891   | CaAPL1    | PROTEIN FATE [folding modification destination]                                 | CELLULAR TRANSP                                 |
| CA5338 | 1.0 | 1.0 | 1.0 | 1.0 | 1.0 | 0.9 | IPF889     | complemer ATP-dependent RNA helicase (by              | orf19.7213 | 889   | IPF889    | CLASSIFICATION NOT YET CLEAR-CUT                                                | helicase activity                               |
| CA5339 | 1.1 | 1.0 | 0.9 | 1.0 | 1.0 | 1.2 | IPF885     | 16040381..glucan 1,3-beta-glucosidase (by h           | orf19.7214 | 885   | IPF885    | C-compound and carbohydrate metabolism UNCLASSIFIED PROTEINS                    | molecular_function unknown                      |
| CA5340 | 1.0 | 1.0 | 1.0 | 1.0 | 1.1 | 1.0 | IPF883     | 16042494..unknown function                            | orf19.7215 | 883   | IPF883    | UNCLASSIFIED PROTEINS                                                           | RNA binding                                     |
| CA5341 | 1.0 | 0.9 | 0.7 | 0.8 | 0.9 | 0.9 | HSP10.3    | 16048241..10 kDa mitochondrial heat shock chaperonin, | orf19.7216 | 878   | CaHSP10.3 | PROTEIN FATE [folding modification destination]                                 | SUBCELLULAR LOC                                 |
| CA5342 | 1.0 | 1.0 | 1.0 | 1.0 | 1.0 | 1.1 | YPT521     | 16048974..GTP-binding protein of the rab/ypt          | orf19.7216 | 877   | CaYPT521  | PROTEIN FATE [folding modification destination]                                 | CELLULAR TRANSP                                 |
| CA5343 | 1.0 | 0.9 | 0.9 | 0.8 | 1.0 | 1.2 | RPL4B      | complemer Ribosomal protein L4B (by homol             | orf19.7217 | 875   | CaRPL4B   | PROTEIN SYNTHESIS SUBCELLULAR LOCALISATION                                      | structural molecule activity                    |
| CA5344 | 0.9 | 1.1 | 1.1 | 1.0 | 1.0 | 1.0 | PRY2       | complemer putative pathogen related proteins          | orf19.7218 | 872   | CaPRY2    | CELL FATE                                                                       | molecular_function unknown                      |
| CA5345 | 0.6 | 0.3 | 1.2 | 1.4 | 1.1 | 1.0 | FTR1       | 16056888..high affinity iron permehigh-affinity       | orf19.7219 | 868   | CaFTR1    | REGULATION OF/INTERACTION WITH CELLULAR ENVIRONMENT S                           | transporter activity                            |
| CA5346 | 1.0 | 0.9 | 1.0 | 1.0 | 0.9 | 1.0 | IPF867     | complemer unknown function                            | orf19.7221 | 867   | IPF867    | UNCLASSIFIED PROTEINS                                                           | hydrolase activity                              |
| CA5347 | 0.9 | 1.1 | 0.9 | 1.1 | 1.0 | 1.0 | IPF864     | complemer unknown function                            | orf19.7222 | 864   | IPF864    | UNCLASSIFIED PROTEINS                                                           | molecular_function unknown                      |
| CA5348 | 1.0 | 1.0 | 1.0 | 0.9 | 1.0 | 1.0 | IPF863     | 16064221..involved in inositol biosynthesis (b        | orf19.7223 | 863   | IPF863    | C-compound and carbohydrate metabolism                                          | molecular_function unknown                      |
| CA5349 | 1.0 | 0.9 | 1.0 | 1.0 | 1.0 | 1.0 | IPF861     | 16066337..unknown function                            | orf19.7224 | 861   | IPF861    | UNCLASSIFIED PROTEINS                                                           | molecular_function unknown                      |
| CA5350 | 0.9 | 0.9 | 1.0 | 1.0 | 1.0 | 1.0 | IPF859     | 16068549..unknown function                            | orf19.7225 | 859   | IPF859    | No significant S.c. match                                                       |                                                 |
| CA5351 | 1.2 | 1.1 | 0.9 | 1.0 | 1.1 | 0.9 | IPF857     | complemer unknown function                            | orf19.7227 | 857   | IPF857    | UNCLASSIFIED PROTEINS                                                           | molecular_function unknown                      |
| CA5352 | 1.0 | 1.0 | 1.0 | 0.9 | 1.0 | 0.9 | IPF856     | 16070891..unknown function                            | orf19.7228 | 856   | IPF856    | UNCLASSIFIED PROTEINS                                                           | molecular_function unknown                      |
| CA5353 | 1.1 | 1.1 | 1.0 | 0.9 | 1.0 | 1.0 | IML2       | complemer unknown function                            | orf19.7229 | 855   | CaIML2    | UNCLASSIFIED PROTEINS                                                           | molecular_function unknown                      |
| CA5354 | 1.1 | 0.9 | 1.0 | 1.1 | 1.0 | 1.1 | FTR2       | complemer high affinity iron permehigh-affinity       | orf19.7231 | 853   | CaFTR2    | REGULATION OF/INTERACTION WITH CELLULAR ENVIRONMENT SUBCELLULAR LOCALISATION TF |                                                 |
| CA5355 | 0.9 | 1.0 | 1.0 | 1.1 | 1.1 | 1.1 | IRR1.3F    | complemer cohesin complex subunit, 3-prime            | orf19.7232 | 850   | CaIRR1.3F | CELL CYCLE AND DNA PROCESSING SUBCELLULAR LOCALISATION                          |                                                 |
| CA5356 | 1.0 | 1.0 | 1.1 | 1.0 | 1.0 | 0.9 | IRR1.5F    | complemer cohesin complex subunit, 5-prime            | orf19.7233 | 849   | CaIRR1.5F | CELL CYCLE AND DNA PROCESSING SUBCELLULAR LOCALISATION                          | protein binding                                 |
| CA5357 | 1.0 | 1.0 | 1.0 | 1.0 | 0.9 | 1.0 | RSC8       | 16082295..chromatin remodeling complex su             | orf19.7234 | 848   | CaRSC8    | CELL CYCLE AND DNA PROCESSING TRANSCRIPTION SUBCELLUL                           | molecular_function unknown                      |
| CA5358 | 0.9 | 1.1 | 0.9 | 1.0 | 1.0 | 1.0 | IPF846     | complemer WD-repeat protein, beta-transduci           | orf19.7235 | 846   | IPF846    | UNCLASSIFIED PROTEINS                                                           | molecular_function unknown                      |
| CA5359 | 1.0 | 1.0 | 1.0 | 1.0 | 1.1 | 1.0 | TIF35      | complemer translation initiation factor eIF3, p3      | orf19.7236 | 842   | CaTIF35   | PROTEIN SYNTHESIS SUBCELLULAR LOCALISATION                                      | translation regulator activity                  |
| CA5360 | 1.0 | 0.9 | 1.1 | 1.0 | 1.0 | 1.1 | IPF839     | 16088591..unknown function                            | orf19.7237 | 839   | IPF839    | UNCLASSIFIED PROTEINS                                                           | molecular_function unknown                      |
| CA5361 | 1.0 | 1.0 | 1.1 | 1.1 | 1.0 | 1.0 | NPL3       | complemer nucleolar shuttling protein with an         | orf19.7238 | 837   | CaNPL3    | TRANSCRIPTION                                                                   | PROTEIN FATE [folding modification destination] |
| CA5362 | 1.1 | 1.0 | 0.9 | 1.0 | 1.2 | 1.1 | IPF836.3   | complemer regulation of G-protein function, 3-        | orf19.7239 | 836   | IPF836.3  | CELLULAR COMMUNICATION/SIGNAL TRANSDUCTION MECHANISM                            | DNA binding                                     |
| CA5363 | 1.0 | 0.9 | 1.0 | 1.1 | 1.2 | 1.1 | NCR1       | complemer Polytopic membrane protein invol            | orf19.7242 | 829   | CaNCR1    | Lipid fatty-acid and isoprenoid metabolism                                      | molecular_function unknown                      |
| CA5364 | 1.0 | 1.1 | 1.0 | 1.1 | 1.0 | 0.9 | DCD1       | 16098318..deoxycytidylate deaminase (by ho            | orf19.7243 | 825   | CaDCD1    | Nucleotide metabolism                                                           | hydrolase activity                              |
| CA5365 | 1.0 | 1.0 | 1.0 | 1.0 | 1.0 | 0.9 | IPF824     | complemer 2-hydroxyhepta-2,4-diene-1,7-dio            | orf19.7244 | 824   | IPF824    | UNCLASSIFIED PROTEINS                                                           | molecular_function unknown                      |
| CA5366 | 0.9 | 1.0 | 1.0 | 1.1 | 1.0 | 1.0 | IPF823     | 16100311..tRNA (5-methylaminomethyl-2-thic            | orf19.7245 | 823   | IPF823    | UNCLASSIFIED PROTEINS                                                           | transferase activity                            |
| CA5367 | 1.0 | 1.1 | 1.1 | 0.9 | 1.0 | 0.9 | RIM101     | complemer Zn finger transcription factor homo         | orf19.7247 | 822   | CaRIM101  | CELL CYCLE AND DNA PROCESSING TRANSCRIPTION SUBCELLUL                           | transcription regulator activity                |
| CA5368 | 0.9 | 0.9 | 0.9 | 0.9 | 0.9 | 0.9 | IPF5257    | 16105366..unknown function                            | orf19.7250 | 5257  | IPF5257   | UNCLASSIFIED PROTEINS                                                           |                                                 |
| CA5369 | 1.0 | 1.0 | 1.0 | 1.1 | 1.1 | 1.1 | WSC4       | complemer Cell wall integrity by homology             | orf19.7251 | 5256  | CaWSC4    | CELL RESCUE DEFENSE AND VIRULENCE                                               | CONTROL OF CELLUL/signal transducer activity    |
| CA5370 | 1.0 | 1.0 | 1.0 | 1.0 | 1.0 | 1.0 | IPF5248    | complemer unknown function                            | orf19.7254 | 5248  | IPF5248   | UNCLASSIFIED PROTEINS                                                           | molecular_function unknown                      |
| CA5371 | 1.0 | 1.0 | 1.0 | 1.1 | 1.1 | 1.1 | RPC10      | 16110659..DNA-directed RNA polymerases s              | orf19.7255 | 5246  | CaRPC10   | No significant S.c. match                                                       |                                                 |
| CA5372 | 1.0 | 1.0 | 1.0 | 1.1 | 1.0 | 1.0 | MLH3       | complemer DNA mismatch repair by homology             | orf19.7257 | 5245  | CaMLH3    | CELL CYCLE AND DNA PROCESSING                                                   | molecular_function unknown                      |
| CA5373 | 1.1 | 1.0 | 1.0 | 1.0 | 1.0 | 1.0 | IPF5243    | 16112726..snRNP (by homology)                         | orf19.7256 | 5243  | IPF5243   | TRANSCRIPTION SUBCELLULAR LOCALISATION                                          | RNA binding                                     |
| CA5374 | 1.1 | 1.0 | 1.0 | 0.9 | 1.1 | 0.9 | DDI1       | 16113118..Response to DNA alkylation by ho            | orf19.7258 | 5241  | CaDDI1    | CELL RESCUE DEFENSE AND VIRULENCE                                               | protein binding                                 |
| CA5375 | 1.0 | 1.0 | 1.1 | 1.0 | 1.0 | 0.9 | IPF5239    | complemer similarity to aldose reductase (by          | orf19.7260 | 5239  | IPF5239   | C-compound and carbohydrate metabolism                                          |                                                 |
| CA5376 | 1.0 | 1.0 | 1.0 | 1.1 | 1.0 | 1.2 | GD1I       | complemer GDP dissociation inhibitor by homo          | orf19.7261 | 5237  | CaGD1I    | CELLULAR TRANSPORT AND TRANSPORT MECHANISMS SUBCELL                             | enzyme regulator activity                       |
| CA5377 | 0.9 | 1.1 | 1.0 | 1.0 | 1.0 | 0.9 | IPF5234    | complemer X-Pro dipeptidase (by homology)             | orf19.7263 | 5234  | IPF5234   | PROTEIN FATE [folding modification destination]                                 | peptidase activity                              |
| CA5378 | 1.0 | 1.0 | 1.0 | 1.0 | 1.0 | 1.0 | MPR1       | 16117776..26S proteasome regulatory subun             | orf19.7264 | 5231  | CaMPR1    | PROTEIN FATE [folding modification destination]                                 | SUBCELLULAR LOC                                 |
| CA5379 | 1.0 | 1.0 | 1.0 | 1.0 | 1.1 | 1.0 | IPF5228.5  | 16118769..similar to Saccharomyces cerevisi           | orf19.7265 | 5228  | IPF5228.5 | TRANSCRIPTION                                                                   | RNA binding                                     |
| CA5380 | 0.9 | 0.9 | 1.0 | 1.0 | 1.0 | 1.0 | IPF5224    | complemer unknown function                            | orf19.7267 | 5224  | IPF5224   | No significant S.c. match                                                       |                                                 |
| CA5381 | 1.0 | 1.1 | 0.9 | 1.0 | 1.1 | 0.9 | IPF5222    | complemer arylalkylamine n-acetyltransferase          | orf19.7269 | 5222  | IPF5222   | UNCLASSIFIED PROTEINS                                                           | molecular_function unknown                      |
| CA5382 | 1.1 | 1.0 | 1.0 | 0.9 | 1.0 | 1.0 | IPF5217    | 16122809..unknown function                            | orf19.7270 | 5217  | IPF5217   | No significant S.c. match                                                       |                                                 |
| CA5383 | 1.0 | 1.0 | 1.1 | 0.9 | 1.1 | 1.0 | ZORRO1B.3F | complemer reverse transcriptase, 3-prime end          | orf19.7273 | 14000 | CaZorro1b | No significant S.c. match                                                       |                                                 |
| CA5384 | 1.0 | 0.9 | 1.0 | 1.0 | 1.0 | 0.9 | ZORRO1B.5F | complemer reverse transcriptase, 5-prime end          | orf19.7274 | 14001 | CaZorro1b | No significant S.c. match                                                       |                                                 |
| CA5385 | 1.0 | 1.0 | 1.0 | 1.0 | 0.9 | 0.9 | ZORRO2B.3F | complemer reverse transcriptase, 3-prime end          | orf19.7275 | 14003 | CaZorro2b | No significant S.c. match                                                       |                                                 |
| CA5386 | 0.9 | 1.0 | 1.1 | 1.0 | 1.0 | 1.0 | ZORRO2B.5F | complemer Putative gag protein, 5-prime end           | orf19.7277 | 14005 | CaZorro2b | No significant S.c. match                                                       |                                                 |
| CA5387 | 1.2 | 0.7 | 0.4 | 0.4 | 0.6 | 0.6 | CTA24.3    | complemer transcriptional activator, 3-prime end      | orf19.7277 | 14006 | CaCTA24.3 | No significant S.c. match                                                       |                                                 |
| CA5388 | 1.2 | 1.7 | 0.9 | 0.8 | 0.9 | 1.0 | PET9       | complemer ADP/ATP carrier protein (by homo            | orf19.8545 | 6536  | CaPET9    | Nucleotide metabolism                                                           | CELLULAR TRANSPORT AND TRANSPORT M              |
| CA5389 | 1.0 | 0.9 | 1.0 | 1.0 | 1.1 | 1.0 | IFA13      | complemer unknown function                            | orf19.931  | 6533  | CaIFA13   | C-compound and carbohydrate metabolism                                          | TRANSCRIPTION SUBCELLULAR LOCALISATION          |
| CA5390 |     |     |     |     |     |     | DRS24      | complement(16139225..16144375)                        |            |       |           |                                                                                 |                                                 |
| CA5391 | 1.0 | 1.0 | 0.9 | 1.0 | 1.0 | 1.0 | IPF18109   | 16147634..unknown function                            | orf19.934  | 18109 | IPF18109  | No significant S.c. match                                                       |                                                 |
| CA5392 | 1.0 | 1.2 | 0.9 | 1.1 | 1.0 | 1.0 | IPF10571   | 16158605..unknown function                            | orf19.935  | 10571 | IPF10571  | No significant S.c. match                                                       |                                                 |
| CA5393 | 1.0 | 1.0 | 1.0 | 1.0 | 0.9 | 1.0 | IPF9398    | complemer unknown function                            | orf19.936  | 9398  | IPF9398   | No significant S.c. match                                                       |                                                 |
| CA5394 | 1.0 | 1.0 | 1.0 | 1.0 | 0.9 | 0.9 | IPF9400    | complemer unknown function                            | orf19.937  | 9400  | IPF9400   | UNCLASSIFIED PROTEINS                                                           |                                                 |

|        |     |     |     |     |     |     |              |                                                        |            |       |            |                                                                                                     |
|--------|-----|-----|-----|-----|-----|-----|--------------|--------------------------------------------------------|------------|-------|------------|-----------------------------------------------------------------------------------------------------|
| CA5395 | 1.1 | 1.0 | 1.0 | 1.0 | 1.0 | 1.1 | IPF9401      | complemer unknown function                             | orf19.938  | 9401  | IPF9401    | No significant S.c. match                                                                           |
| CA5396 | 1.1 | 1.1 | 1.0 | 1.1 | 1.1 | 1.1 | NAM7         | complemer nonsense-mediated mRNA decay                 | orf19.939  | 9662  | CaNAM7     | Nucleotide metabolism PROTEIN SYNTHESIS SUBCELLULAR LOCAL helicase activity                         |
| CA5397 | 1.0 | 1.1 | 0.9 | 0.9 | 1.0 | 1.0 | IPF9663      | 16175902..similar to Saccharomyces cerevisi            | orf19.940  | 9663  | IPF9663    | CELL FATE signal transducer activity                                                                |
| CA5398 | 0.9 | 0.9 | 1.1 | 1.1 | 1.1 | 1.1 | SEC14        | 16181246..phosphatidylinositol(Pi phosphatid           | orf19.941  | 9666  | CaSEC14    | Lipid fatty-acid and isoprenoid metabolism ""CELLULAR TRANSPORT A transporter activity              |
| CA5399 | 0.9 | 0.9 | 1.0 | 1.0 | 1.0 | 1.0 | KRE62.5F     | 16183259..Glucan synthase subunit, 5-prime             | orf19.942  | 1538  | CaKRE62.5  | C-compound and carbohydrate metabolism CELL FATE CONTROL OF CELLULAR ORGANIZATION SUB               |
| CA5400 | 1.0 | 1.0 | 1.0 | 1.0 | 1.0 | 1.0 | KRE62.3F     | 16185108..Glucan synthase subunit, 3-prime end (by hom |            | 1539  | CaKRE62.3  | No significant S.c. match                                                                           |
| CA5401 | 1.0 | 1.0 | 1.0 | 1.0 | 1.0 | 1.0 | FET35.3      | 16185517..Cell surface ferroxidase, high affin         | orf19.943  | 1540  | CaFET35.3  | CELLULAR TRANSPORT AND TRANSPORT MECHANISMS REGULATION OF/INTERACTION WITH CEI                      |
| CA5402 | 1.0 | 1.0 | 1.1 | 1.0 | 1.1 | 1.0 | IFG3.3       | 16188612..probable d-amino acid oxidase, 3-            | orf19.944  | 1541  | CaIFG3.3   | No significant S.c. match                                                                           |
| CA5403 | 1.0 | 1.0 | 1.0 | 1.0 | 1.0 | 1.1 | IPF1542      | 16189271..unknown function                             | orf19.945  | 1542  | IPF1542    | PROTEIN FATE [folding modification destination] ""CELLULAR TRANSProtein binding                     |
| CA5404 | 0.9 | 1.0 | 1.1 | 1.1 | 1.0 | 1.0 | MET14        | complemer Adenylylsulfate kinase (by homolo            | orf19.946  | 1543  | CaMET14    | Amino acid metabolism Nitrogen and sulphur metabolism transferase activity                          |
| CA5405 | 1.0 | 1.1 | 1.1 | 0.9 | 1.1 | 1.0 | MRP17        | 16191360..Mitochondrial ribosomal protein (b           | orf19.947  | 1544  | CaMRP17    | PROTEIN SYNTHESIS SUBCELLULAR LOCALISATION structural molecule activity                             |
| CA5406 | 1.0 | 1.0 | 1.1 | 0.9 | 0.9 | 1.0 | IPF1547      | 16193043..unknown function                             | orf19.949  | 1547  | IPF1547    | PROTEIN FATE [folding modification destination] ""CELLULAR TRANSPORT AND TRANSPORT MECHAN           |
| CA5407 | 1.1 | 0.8 | 0.8 | 0.9 | 0.9 | 1.1 | IPF1548      | 16197395..unknown function                             | orf19.951  | 1548  | IPF1548    | No significant S.c. match                                                                           |
| CA5408 | 1.1 | 1.0 | 1.0 | 1.0 | 0.9 | 1.0 | IPF1551      | complemer unknown function                             | orf19.952  | 1551  | IPF1551    | No significant S.c. match                                                                           |
| CA5409 | 1.0 | 1.0 | 1.0 | 0.9 | 1.0 | 1.0 | COF1         | complemer cofilin (by homology)                        |            | 1554  | CaCOF1     | PROTEIN FATE [folding modification destination] ""CELLULAR TRANSProtein binding                     |
| CA5410 | 0.9 | 1.0 | 1.0 | 1.1 | 1.1 | 1.0 | IPF1557      | 16203444..similar to dnaJ proteins                     | orf19.954  | 1557  | IPF1557    | PROTEIN FATE [folding modification destination]                                                     |
| CA5411 | 1.1 | 0.9 | 1.0 | 1.0 | 1.1 | 1.0 | IPF1558      | complemer unknown function                             | orf19.955  | 1558  | IPF1558    | No significant S.c. match                                                                           |
| CA5412 | 1.1 | 1.0 | 1.1 | 1.1 | 1.1 | 1.1 | IPF1566      | 16206178..unknown function                             | orf19.956  | 1566  | IPF1566    | UNCLASSIFIED PROTEINS molecular_function unknown                                                    |
| CA5413 | 1.1 | 0.9 | 1.0 | 1.0 | 1.0 | 1.0 | IPF1567      | complemer mitochondrial ribosomal protein L34 (by homo |            | 1567  | IPF1567    | PROTEIN SYNTHESIS structural molecule activity                                                      |
| CA5414 | 1.0 | 1.0 | 1.1 | 1.1 | 1.1 | 1.1 | IPF1568      | 16215716..unknown function                             | orf19.962  | 1568  | IPF1568    | TRANSCRIPTION SUBCELLULAR LOCALISATION nucleotidyltransferase activity                              |
| CA5415 | 1.0 | 1.0 | 0.9 | 1.0 | 1.0 | 1.0 | SMC4         | 16216486..Stable Maintenance of Chromosor              | orf19.964  | 1574  | CaSMC4     | CONTROL OF CELLULAR ORGANIZATION hydrolase activity                                                 |
| CA5416 | 1.0 | 1.1 | 1.0 | 1.0 | 1.2 | 1.0 | IPF1576      | complemer unknown function                             | orf19.966  | 1576  | IPF1576    | UNCLASSIFIED PROTEINS                                                                               |
| CA5417 | 1.0 | 1.0 | 1.0 | 1.0 | 0.9 | 1.0 | NUC1         | 16222130..Nuclease, mitochondrial                      | orf19.967  | 1578  | CaNUC1     | Nucleotide metabolism SUBCELLULAR LOCALISATION RNA binding                                          |
| CA5418 | 1.1 | 1.1 | 1.0 | 1.1 | 1.0 | 1.1 | IPF1580      | complemer unknown function                             | orf19.968  | 1580  | IPF1580    | UNCLASSIFIED PROTEINS molecular_function unknown                                                    |
| CA5419 | 1.1 | 1.1 | 1.0 | 1.1 | 1.0 | 1.0 | PRS1         | complemer Ribose-phosphate pyrophosphokir              | orf19.969  | 1582  | CaPRS1     | Amino acid metabolism Nucleotide metabolism Purine ribonucleotide mtransferase activity             |
| CA5420 | 1.0 | 1.1 | 1.0 | 1.0 | 0.9 | 1.0 | IPF1583      | 16223306..unknown function                             | orf19.970  | 1583  | IPF1583    | UNCLASSIFIED PROTEINS molecular_function unknown                                                    |
| CA5421 | 1.0 | 1.0 | 1.0 | 0.9 | 1.0 | 1.1 | SKN7         | complemer Transcription factor (by homology)           | orf19.971  | 1586  | CaSKN7     | CELL CYCLE AND DNA PROCESSING TRANSCRIPTION CELLULAR (signal transducer activity,transcript         |
| CA5422 | 1.0 | 0.9 | 1.1 | 1.0 | 1.0 | 1.0 | IPF1588      | 16229370..unknown function                             | orf19.972  | 1588  | IPF1588    | UNCLASSIFIED PROTEINS molecular_function unknown                                                    |
| CA5423 | 1.1 | 1.0 | 1.0 | 1.0 | 0.9 | 1.0 | ROT2         | complemer Glucosidase II, catalytic subunit (b         | orf19.974  | 1591  | CaROT2     | C-compound and carbohydrate metabolism ENERGY SUBCELLULAR L hydrolase activity                      |
| CA5424 | 1.0 | 1.0 | 1.0 | 1.0 | 0.9 | 1.1 | IPF1598      | 16233612..unknown function                             | orf19.976  | 1598  | IPF1598    | UNCLASSIFIED PROTEINS ligase activity                                                               |
| CA5425 | 1.2 | 1.2 | 1.0 | 1.0 | 1.2 | 1.2 | BDF1         | 16236647..sporulation protein (by homology)            | orf19.978  | 1604  | CaBDF1     | TRANSCRIPTION CELL FATE SUBCELLULAR LOCALISATION transcription regulator activity                   |
| CA5426 | 0.9 | 1.0 | 1.4 | 1.6 | 1.3 | 1.4 | FAS1         | 16239835..Fatty-acyl-CoA synthase, beta cha            | orf19.979  | 1611  | CaFAS1     | Lipid fatty-acid and isoprenoid metabolism ""SUBCELLULAR LOCALISA lyase activity                    |
| CA5427 |     |     |     |     |     |     | IPF1615.3EOC | complement(16245992..16248238)                         |            |       |            |                                                                                                     |
| CA5428 | 1.0 | 1.0 | 1.1 | 1.0 | 1.0 | 1.1 | BOI2         | 16251930..budding protein (by homology)                | orf19.3230 | 179   | CaBOI2     | CELL FATE                                                                                           |
| CA5429 | 0.9 | 1.0 | 1.0 | 1.0 | 1.0 | 1.0 | CDC27        | 16256263..subunit of anaphase-promoting co             | orf19.3231 | 185   | CaCDC27    | CELL CYCLE AND DNA PROCESSING ""PROTEIN FATE [folding modifi                                        |
| CA5430 | 1.0 | 1.0 | 1.0 | 1.1 | 1.0 | 0.9 | IPF191       | complemer putative permease (by homology)              | orf19.3232 | 191   | IPF191     | TRANSPORT FACILITATION protein binding                                                              |
| CA5431 | 0.9 | 1.0 | 1.0 | 1.0 | 1.0 | 1.0 | IPF195       | 16266757..unknown function                             | orf19.3233 | 195   | IPF195     | CELLULAR COMMUNICATION/SIGNAL TRANSDUCTION MECHANISM protein binding                                |
| CA5432 | 1.1 | 1.1 | 1.0 | 1.0 | 1.1 | 1.0 | EBP5         | complemer NADPH dehydrogenase (by homo                 | orf19.3234 | 197   | CaEBP5     | ENERGY transporter activity                                                                         |
| CA5433 | 1.0 | 1.0 | 1.0 | 1.0 | 0.9 | 1.0 | SFT1         | 16270617..SNARE-like protein (by homology)             |            | 198   | CaSFT1     | CELLULAR TRANSPORT AND TRANSPORT MECHANISMS SUBCELL transporter activity                            |
| CA5434 | 0.9 | 1.0 | 1.1 | 1.0 | 1.0 | 1.0 | IPF199       | complemer F-actin capping protein alpha subu           | orf19.3235 | 199   | IPF199     | CELL FATE SUBCELLULAR LOCALISATION protein binding                                                  |
| CA5435 | 1.1 | 1.1 | 1.0 | 1.1 | 1.0 | 1.1 | UFD4         | complemer ubiquitin fusion degradation protei          | orf19.3237 | 204   | CaUFD4     | PROTEIN FATE [folding modification destination] ""SUBCELLULAR LOC ligase activity                   |
| CA5436 | 1.0 | 1.0 | 1.0 | 1.0 | 0.9 | 1.0 | CTF18        | 16284780..chromosome transmission in mitos             | orf19.3239 | 217   | CaCTF18    | CELL CYCLE AND DNA PROCESSING SUBCELLULAR LOCALISATIO molecular_function unknown                    |
| CA5437 | 1.0 | 1.1 | 0.9 | 1.0 | 1.1 | 1.0 | ERG27        | 16287570..3-keto sterol reductase (by homolo           | orf19.3240 | 218   | CaERG27    | Lipid fatty-acid and isoprenoid metabolism oxidoreductase activity                                  |
| CA5438 | 1.0 | 0.9 | 1.0 | 1.0 | 1.0 | 1.0 | IPF223       | complemer unknown function                             | orf19.3241 | 223   | IPF223     | UNCLASSIFIED PROTEINS molecular_function unknown                                                    |
| CA5439 | 1.0 | 1.0 | 1.0 | 0.9 | 1.0 | 1.0 | TAF25        | 16293173..transcription initiation factor TFIID        | orf19.3242 | 224   | CaTAF25    | TRANSCRIPTION SUBCELLULAR LOCALISATION transcription regulator activity                             |
| CA5440 | 1.0 | 1.2 | 1.0 | 1.1 | 1.0 | 1.1 | SRP54        | complemer 54 kD signal recognition particle sur        | orf19.3243 | 225   | CaSRP54    | PROTEIN FATE [folding modification destination] ""SUBCELLULAR LOCALISATION                          |
| CA5441 | 1.0 | 1.0 | 0.9 | 1.0 | 0.9 | 0.9 | IPF227       | 16295956..unknown function                             | orf19.3244 | 227   | IPF227     | UNCLASSIFIED PROTEINS molecular_function unknown                                                    |
| CA5442 | 1.0 | 0.9 | 1.0 | 1.1 | 1.0 | 1.0 | IPF18105.3F  | complemer unknown function, 3-prime end                | orf19.3245 | 228   | IPF18105.3 | No significant S.c. match                                                                           |
| CA5443 | 1.0 | 1.0 | 1.1 | 1.0 | 1.0 | 1.1 | IPF18105.5F  | complemer unknown function, 3-prime end                | orf19.3246 | 18105 | IPF18105.5 | No significant S.c. match                                                                           |
| CA5444 | 0.9 | 1.0 | 0.9 | 1.0 | 1.0 | 1.0 | IPF230       | complemer unknown function                             | orf19.3247 | 230   | IPF230     | UNCLASSIFIED PROTEINS molecular_function unknown                                                    |
| CA5445 | 1.0 | 0.9 | 1.0 | 1.1 | 1.0 | 1.0 | IPF232       | complemer unknown function                             | orf19.3248 | 232   | IPF232     | UNCLASSIFIED PROTEINS                                                                               |
| CA5446 | 1.1 | 1.1 | 1.0 | 0.9 | 1.0 | 1.0 | LAG1         | complemer longevity-assurance protein (by ho           | orf19.3249 | 233   | CaLAG1     | Lipid fatty-acid and isoprenoid metabolism """"PROTEIN FATE [folding m transporter activity         |
| CA5447 | 1.1 | 1.0 | 1.0 | 1.0 | 0.9 | 1.0 | IPF234       | 16309970..similar to Saccharomyces cerevisi            | orf19.3250 | 234   | IPF234     | TRANSCRIPTION SUBCELLULAR LOCALISATION RNA binding                                                  |
| CA5448 | 1.1 | 0.9 | 0.9 | 0.9 | 0.9 | 1.0 | ARC19.EXON:1 | 16312095..subunit of the Arp2/3 complex invc           | orf19.3251 | 235   | CaARC19.1  | CELLULAR TRANSPORT AND TRANSPORT MECHANISMS SUBCELL structural molecule activity                    |
| CA5449 | 1.0 | 1.0 | 1.0 | 1.0 | 1.0 | 0.9 | DAL81        | complemer Transcriptional activator for allanto        | orf19.3252 | 236   | CaDAL81    | Amino acid metabolism Nitrogen and sulphur metabolism Nucleotide m transcription regulator activity |
| CA5450 | 0.9 | 1.1 | 1.1 | 1.1 | 1.0 | 0.9 | IPF243       | 16316783..unknown function                             | orf19.3254 | 243   | IPF243     | No significant S.c. match                                                                           |
| CA5451 | 1.1 | 1.1 | 1.0 | 1.0 | 1.0 | 1.1 | SLN1         | 16321174..Two-component signal similar to slor         | orf19.3256 | 250   | CaSLN1     | C-compound and carbohydrate metabolism CELLULAR COMMUNICATIO signal transducer activity,protein ki  |
| CA5452 | 0.9 | 0.9 | 1.0 | 1.0 | 1.1 | 1.0 | SEC11        | complemer signal peptidase subunit (by homo            | orf19.3259 | 252   | CaSEC11    | PROTEIN FATE [folding modification destination] ""SUBCELLULAR LOC peptidase activity                |
| CA5453 | 1.0 | 1.0 | 1.0 | 1.0 | 1.0 | 1.1 | IPF256       | 16328198..control of gene expression (by ho            | orf19.3260 | 256   | IPF256     | CELL RESCUE DEFENSE AND VIRULENCE lyase activity                                                    |
| CA5454 | 1.0 | 0.8 | 0.8 | 0.9 | 1.1 | 1.0 | IPF257.3     | complemer member of the FRP family of prote            | orf19.3261 | 257   | IPF257.3   | C-compound and carbohydrate metabolism                                                              |
| CA5455 | 1.0 | 1.1 | 1.1 | 1.0 | 1.0 | 0.9 | IPF263.3     | complemer member of the FRP family of prote            | orf19.3263 | 263   | IPF263.3   | C-compound and carbohydrate metabolism                                                              |
| CA5456 | 0.9 | 1.0 | 1.0 | 1.0 | 0.9 | 1.0 | IPF267       | complemer unknown function                             | orf19.3264 | 267   | IPF267     | CELL CYCLE AND DNA PROCESSING SUBCELLULAR LOCALISATION                                              |
| CA5457 | 1.1 | 1.0 | 0.9 | 1.0 | 0.9 | 1.0 | TRM1         | complemer N2,N2-dimethylguanine tRNA met               | orf19.3265 | 272   | CaTRM1     | TRANSCRIPTION SUBCELLULAR LOCALISATION transferase activity                                         |
| CA5458 | 1.1 | 1.2 | 1.0 | 1.0 | 1.2 | 1.0 | IPF274       | complemer unknown function                             | orf19.3266 | 274   | IPF274     | No significant S.c. match                                                                           |
| CA5459 | 1.0 | 1.0 | 1.0 | 1.0 | 1.0 | 1.0 | IPF276       | 16347302..unknown function                             | orf19.3267 | 276   | IPF276     | UNCLASSIFIED PROTEINS molecular_function unknown                                                    |
| CA5460 | 1.1 | 1.0 | 1.0 | 0.8 | 1.0 | 1.0 | IPF277       | 16348709..human IgE-dependent histamine-r              | orf19.3268 | 277   | IPF277     | PROTEIN SYNTHESIS SUBCELLULAR LOCALISATION molecular_function unknown                               |
| CA5461 | 1.0 | 1.0 | 0.9 | 1.0 | 1.0 | 1.0 | GSL23.5F     | 16350075..1,3-beta-D-glucan synthase subun             | orf19.3269 | 279   | CaGSL23.5  | C-compound and carbohydrate metabolism SUBCELLULAR LOCALISATION                                     |
| CA5462 | 1.0 | 1.0 | 1.0 | 0.9 | 0.9 | 1.0 | GSL23.3F     | 16352359..1,3-beta-D-glucan syntglucan synt            | orf19.3270 | 282   | CaGSL23.3  | C-compound and carbohydrate metabolism CELL FATE SUBCELLULAR LOCALISATION                           |
| CA5463 | 1.0 | 1.0 | 1.0 | 1.0 | 1.0 | 1.0 | IPF284       | complemer unknown function                             | orf19.3272 | 284   | IPF284     | CELL RESCUE DEFENSE AND VIRULENCE ""CELL FATE                                                       |
| CA5464 | 1.0 | 0.9 | 1.0 | 0.9 | 0.9 | 1.0 | IPF285.5F    | 16356515..unknown function, 5-prime end                | orf19.3273 | 285   | IPF285.5f  | UNCLASSIFIED PROTEINS molecular_function unknown                                                    |
| CA5465 | 1.0 | 0.9 | 1.0 | 1.1 | 1.0 | 1.0 | IPF285.3F    | 16357131..unknown function, 3-prime end                | orf19.3274 | 286   | IPF285.3f  | UNCLASSIFIED PROTEINS                                                                               |
| CA5466 | 1.0 | 1.0 | 1.0 | 1.0 | 1.0 | 1.1 | PWP2         | 16358168..periodic tryptophan protein (by ho           | orf19.3276 | 290   | CaPWP2     | CELL CYCLE AND DNA PROCESSING CELL FATE SUBCELLULAR LC RNA binding                                  |

|        |     |     |     |     |     |     |              |                                                                              |       |              |                                                                                     |                                  |
|--------|-----|-----|-----|-----|-----|-----|--------------|------------------------------------------------------------------------------|-------|--------------|-------------------------------------------------------------------------------------|----------------------------------|
| CA5467 | 1.1 | 0.8 | 1.0 | 1.0 | 1.1 | 1.1 | GSY1         | 16362931..UDP glucose--starch glucosyltransorf19.3278                        | 294   | CaGSY1       | C-compound and carbohydrate metabolism ENERGY SUBCELLULAR LOCALISATION              | transferase activity             |
| CA5468 | 1.0 | 1.0 | 1.0 | 1.0 | 1.0 | 1.0 | IFF7         | 16365701..unknown function orf19.3279                                        | 296   | CaIFF7       | UNCLASSIFIED PROTEINS                                                               |                                  |
| CA5469 | 1.0 | 0.9 | 1.0 | 1.0 | 1.0 | 1.1 | IPF298       | 16369927..unknown function orf19.3281                                        | 298   | IPF298       | UNCLASSIFIED PROTEINS                                                               | molecular_function unknown       |
| CA5470 | 1.0 | 1.0 | 1.0 | 1.0 | 1.0 | 1.1 | IPF300       | 16372420..unknown function orf19.3282                                        | 300   | IPF300       | UNCLASSIFIED PROTEINS                                                               |                                  |
| CA5471 | 1.1 | 1.1 | 1.0 | 1.1 | 1.0 | 1.0 | IPF302       | 16374836..short chain dehydrogenase/reduct orf19.3283                        | 302   | IPF302       | Lipid fatty-acid and isoprenoid metabolism ""ENERGY                                 | oxidoreductase activity          |
| CA5472 | 1.0 | 1.0 | 1.0 | 1.1 | 0.9 | 0.9 | IPF16948     | complemer unknown function orf19.3285                                        | 16948 | IPF16948     | UNCLASSIFIED PROTEINS                                                               |                                  |
| CA5473 | 1.1 | 1.0 | 1.0 | 1.0 | 1.0 | 1.1 | IPF16947     | 16377090..unknown function orf19.3286                                        | 16947 | IPF16947     | UNCLASSIFIED PROTEINS                                                               | molecular_function unknown       |
| CA5474 | 1.1 | 1.1 | 1.0 | 1.0 | 1.1 | 1.0 | IPF16944.3EC | complemer unknown function, 3-prime end orf19.3287                           | 16944 | IPF16944.3   | UNCLASSIFIED PROTEINS                                                               | molecular_function unknown       |
| CA5475 | 0.9 | 1.0 | 1.2 | 1.1 | 1.0 | 1.0 | IPF8532      | 16385207..unknown function orf19.5303                                        | 8532  | IPF8532      | No significant S.c. match                                                           |                                  |
| CA5476 | 0.9 | 0.9 | 1.0 | 1.0 | 1.1 | 1.0 | IPF8527      | 16388810..unknown function orf19.5305                                        | 8527  | IPF8527      | No significant S.c. match                                                           |                                  |
| CA5477 | 1.0 | 0.9 | 1.0 | 0.9 | 1.0 | 0.9 | IPF18101     | complemer unknown function orf19.1276i                                       | 18101 | IPF18101     | No significant S.c. match                                                           |                                  |
| CA5478 | 1.0 | 1.1 | 1.0 | 1.0 | 1.0 | 1.0 | JEN2         | complemer carboxylic acid transporter protein orf19.1276j                    | 8196  | CaJEN2       | C-compound and carbohydrate metabolism TRANSPORT FACILITATION                       |                                  |
| CA5479 | 1.1 | 1.0 | 1.1 | 0.9 | 1.0 | 1.0 | IPF8205      | complemer unknown function orf19.5311                                        | 8205  | IPF8205      | No significant S.c. match                                                           |                                  |
| CA5480 | 1.0 | 1.0 | 1.1 | 1.1 | 1.0 | 0.9 | IPF8210      | complemer unknown function orf19.5312                                        | 8210  | IPF8210      | Amino acid metabolism Nitrogen and sulphur metabolism TRANSCRIPTION                 | transcription regulator activity |
| CA5481 | 1.0 | 1.0 | 1.0 | 1.0 | 1.0 | 0.9 | IPF19810     | complemer unknown function orf19.1277j                                       | 19810 | IPF19810     | No significant S.c. match                                                           |                                  |
| CA5482 | 1.0 | 1.0 | 1.0 | 1.1 | 1.0 | 1.0 | IPF14094.REF | 16424046..repeated protein (10 times) of unknown orf19.5315                  | 7748  | IPF14094.REF | No significant S.c. match                                                           |                                  |
| CA5483 | 1.0 | 1.0 | 1.0 | 1.1 | 1.0 | 1.0 | IPF817       | complemer unknown function orf19.5316                                        | 817   | IPF817       | UNCLASSIFIED PROTEINS                                                               |                                  |
| CA5484 | 1.0 | 1.2 | 1.1 | 1.1 | 1.0 | 1.0 | RAD1.3F      | complemer UV endonuclease, component of transcription factor orf19.5318      | 815   | CaRAD1.3     | CELL CYCLE AND DNA PROCESSING SUBCELLULAR LOCALISATION                              | DNA binding                      |
| CA5485 | 1.0 | 1.0 | 1.0 | 1.1 | 1.0 | 1.1 | RAD1.53F     | complemer UV endonuclease, component of transcription factor orf19.5319      | 18099 | CaRAD1.5     | CELL CYCLE AND DNA PROCESSING SUBCELLULAR LOCALISATION                              |                                  |
| CA5486 | 1.0 | 1.0 | 1.0 | 1.0 | 1.0 | 1.0 | IPF813       | 16434892..unknown function orf19.5320                                        | 813   | IPF813       | No significant S.c. match                                                           |                                  |
| CA5487 | 1.0 | 1.0 | 1.0 | 1.1 | 1.0 | 1.0 | MET12        | complemer methylenetetrahydrofolate reductase orf19.5321                     | 812   | CaMET12      | Metabolism of vitamins cofactors and prosthetic groups                              | oxidoreductase activity          |
| CA5488 | 1.0 | 1.0 | 1.0 | 1.0 | 0.8 | 1.0 | IPF810       | complemer unknown function orf19.5322                                        | 810   | IPF810       | UNCLASSIFIED PROTEINS                                                               | enzyme regulator activity        |
| CA5489 | 1.1 | 1.1 | 1.1 | 0.9 | 1.0 | 1.0 | MDH12        | 16438979..mitochondrial malate dehydrogenase orf19.5323                      | 807   | CaMDH12      | C-compound and carbohydrate metabolism ""Lipid fatty-acid and isoprenoid metabolism | oxidoreductase activity          |
| CA5490 | 1.0 | 1.0 | 1.1 | 1.0 | 1.0 | 1.0 | KIN3         | complemer G2-specific serine/threonine protein kinase orf19.5325             | 802   | CaKIN3       | CLASSIFICATION NOT YET CLEAR-CUT                                                    | protein kinase activity          |
| CA5491 | 1.0 | 1.1 | 1.0 | 1.0 | 1.0 | 1.0 | IPF798       | 16443656..transcriptional regulator (by homology) orf19.5326                 | 798   | IPF798       | C-compound and carbohydrate metabolism TRANSCRIPTION                                | transcription regulator activity |
| CA5492 | 1.1 | 1.1 | 1.0 | 1.0 | 1.0 | 0.9 | GCN1.3F      | complemer translational activator, 3-prime end orf19.5328                    | 797   | CaGCN1.3     | PROTEIN SYNTHESIS SUBCELLULAR LOCALISATION                                          |                                  |
| CA5493 | 1.0 | 1.0 | 1.0 | 0.9 | 0.9 | 1.1 | GCN1.5F      | complemer translational activator, 5-prime end orf19.5333                    | 793   | CaGCN1.5     | PROTEIN SYNTHESIS SUBCELLULAR LOCALISATION                                          | molecular_function unknown       |
| CA5494 | 1.1 | 1.0 | 0.9 | 1.1 | 1.0 | 1.0 | IPF85        | complemer similar to Saccharomyces cerevisiae orf19.5334                     | 785   | IPF85        | TRANSCRIPTION                                                                       | molecular_function unknown       |
| CA5495 | 0.9 | 1.0 | 0.9 | 1.0 | 1.0 | 1.0 | SGS1         | 16453723..ATP-dependent DNA Sgs1p [Carboxyl-terminal domain] orf19.5335      | 783   | CaSGS1       | CELL CYCLE AND DNA PROCESSING CELL FATE                                             | DNA binding, helicase activity   |
| CA5496 | 1.0 | 1.0 | 1.0 | 1.1 | 1.0 | 1.0 | IPF779       | 16457414..E2 ubiquitin conjugating enzyme (for ubiquitin) orf19.5337         | 779   | IPF779       | PROTEIN FATE [folding modification destination]                                     |                                  |
| CA5497 | 1.0 | 1.0 | 1.2 | 1.3 | 1.2 | 1.2 | IPF776       | 16459065..transcriptional activator (by homology) orf19.5338                 | 776   | IPF776       | C-compound and carbohydrate metabolism TRANSCRIPTION SUBCELLULAR LOCALISATION       |                                  |
| CA5498 | 0.9 | 0.9 | 1.0 | 1.0 | 0.9 | 1.0 | IPF772       | 16460511..unknown function orf19.5340                                        | 772   | IPF772       | PROTEIN SYNTHESIS SUBCELLULAR LOCALISATION UNCLASSIFIED                             | enzyme regulator activity        |
| CA5499 | 1.0 | 1.1 | 1.0 | 1.2 | 1.0 | 1.1 | RPS4A        | 16462327..ribosomal protein S4 ribosomal protein orf19.5341                  | 771   | CaRPS4A      | PROTEIN SYNTHESIS SUBCELLULAR LOCALISATION                                          | structural molecule activity     |
| CA5500 | 0.9 | 0.9 | 1.0 | 0.9 | 1.0 | 0.9 | IPF768       | 16463208..unknown function orf19.5342                                        | 768   | IPF768       | UNCLASSIFIED PROTEINS                                                               | molecular_function unknown       |
| CA5501 | 1.0 | 0.9 | 1.1 | 1.1 | 1.0 | 1.0 | MTR2.3       | complemer mRNA transport protein, 3-prime end (by homology) orf19.5343       | 767   | CaMTR2.3     | TRANSCRIPTION CELLULAR TRANSPORT AND TRANSPORT MECHANISMS                           | protein binding                  |
| CA5502 | 1.0 | 1.0 | 0.9 | 1.0 | 1.0 | 0.9 | IPF763       | 16467039..putative transcription factor zinc-finger orf19.5343               | 763   | IPF763       | TRANSCRIPTION REGULATION OF/INTERACTION WITH CELLULAR TRANSPORT                     | transcription regulator activity |
| CA5503 | 0.9 | 1.2 | 0.9 | 0.9 | 1.0 | 1.1 | DSK2         | 16468574..ubiquitin-like protein (by homology) orf19.5345                    | 761   | CaDSK2       | CELL CYCLE AND DNA PROCESSING SUBCELLULAR LOCALISATION                              |                                  |
| CA5504 | 1.1 | 1.0 | 0.9 | 1.1 | 1.0 | 1.0 | TAF65        | 16469753..subunit of transcription factor TFIID orf19.5346                   | 758   | CaTAF65      | TRANSCRIPTION                                                                       | transcription regulator activity |
| CA5505 | 1.0 | 1.0 | 0.9 | 1.2 | 1.1 | 1.0 | TPS3.3       | 16471311..alpha, alpha-trehalose-phosphate synthase orf19.5348               | 753   | CaTPS3.3     | C-compound and carbohydrate metabolism ENERGY SUBCELLULAR LOCALISATION              | transferase activity             |
| CA5506 | 0.9 | 1.0 | 1.0 | 1.0 | 1.0 | 1.1 | IPF748       | complemer unknown function orf19.5350                                        | 748   | IPF748       | TRANSCRIPTION SUBCELLULAR LOCALISATION                                              | protein kinase activity          |
| CA5507 | 1.1 | 1.0 | 1.0 | 1.0 | 1.0 | 1.1 | TIF11        | 16475396..translation initiation factor eIF1a (for eIF4G) orf19.5351         | 747   | CaTIF11      | PROTEIN SYNTHESIS SUBCELLULAR LOCALISATION                                          | translation regulator activity   |
| CA5508 | 1.0 | 0.9 | 1.0 | 1.0 | 1.0 | 1.0 | IPF745       | complemer unknown function orf19.5352                                        | 745   | IPF745       | UNCLASSIFIED PROTEINS                                                               |                                  |
| CA5509 | 1.1 | 1.0 | 1.0 | 1.0 | 1.0 | 1.0 | IPF743       | 16477379..unknown function orf19.5353                                        | 743   | IPF743       | TRANSPORT FACILITATION                                                              |                                  |
| CA5510 | 1.2 | 1.0 | 1.0 | 1.0 | 1.0 | 1.0 | IPF741       | complemer unknown function orf19.5356                                        | 741   | IPF741       | UNCLASSIFIED PROTEINS                                                               | molecular_function unknown       |
| CA5511 | 1.0 | 1.0 | 1.0 | 1.0 | 1.1 | 1.0 | AKL1         | complemer serine/threonine protein kinase (by homology) orf19.5357           | 737   | CaAKL1       | CELL CYCLE AND DNA PROCESSING SUBCELLULAR LOCALISATION                              | protein kinase activity          |
| CA5512 | 1.0 | 1.0 | 1.0 | 1.0 | 1.0 | 1.0 | ORC2         | complemer origin recognition complex subunit orf19.5358                      | 733   | CaORC2       | CELL CYCLE AND DNA PROCESSING TRANSCRIPTION CELL FATE                               | DNA binding                      |
| CA5513 | 1.1 | 1.0 | 1.0 | 1.0 | 1.0 | 1.2 | RPC11        | 16485782..RNA polymerase III C11 subunit (for RNA polymerase III) orf19.5360 | 731   | CaRPC11      | TRANSCRIPTION                                                                       | nucleotidyltransferase activity  |
| CA5514 | 1.0 | 1.1 | 1.0 | 0.9 | 1.0 | 1.0 | IPF730       | complemer unknown function orf19.5362                                        | 730   | IPF730       | No significant S.c. match                                                           |                                  |
| CA5515 | 0.9 | 1.0 | 1.0 | 0.9 | 1.0 | 1.1 | SAT2         | complemer putative glycosyl-transferase involved in glycosylation orf19.5363 | 728   | CaSAT2       | CELL RESCUE DEFENSE AND VIRULENCE                                                   | molecular_function unknown       |
| CA5516 | 1.1 | 1.0 | 1.0 | 1.0 | 1.0 | 1.0 | IPF726       | 16488869..rna binding protein (by homology) orf19.5364                       | 726   | IPF726       | CONTROL OF CELLULAR ORGANIZATION                                                    | molecular_function unknown       |
| CA5517 | 1.1 | 1.0 | 1.1 | 1.0 | 1.1 | 0.9 | IPF721.3F    | complemer unknown function, 3-prime end orf19.5365                           | 724   | IPF721.3f    | UNCLASSIFIED PROTEINS                                                               |                                  |
| CA5518 | 1.0 | 1.0 | 1.0 | 1.0 | 1.0 | 1.0 | IPF721.5F    | complemer unknown function, 5-prime end orf19.5366                           | 721   | IPF721.5f    | UNCLASSIFIED PROTEINS                                                               | molecular_function unknown       |
| CA5519 | 1.0 | 1.1 | 1.0 | 0.9 | 1.0 | 1.0 | RDH54        | 16494038..helicase required for mitotic disassembly orf19.5367               | 718   | CaRDH54      | CELL CYCLE AND DNA PROCESSING                                                       | DNA binding                      |
| CA5520 | 1.0 | 1.0 | 1.0 | 1.0 | 1.1 | 1.1 | IPF714       | complemer unknown function orf19.5368                                        | 714   | IPF714       | UNCLASSIFIED PROTEINS                                                               | molecular_function unknown       |
| CA5521 | 1.0 | 1.0 | 1.0 | 0.9 | 1.0 | 1.0 | HEM12        | complemer uroporphyrinogen decarboxylase (for heme biosynthesis) orf19.5369  | 712   | CaHEM12      | Metabolism of vitamins cofactors and prosthetic groups ""SUBCELLULAR LOCALISATION   | lyase activity                   |
| CA5522 | 1.0 | 1.1 | 1.0 | 1.1 | 1.1 | 1.1 | IPF708       | 16499832..unknown function orf19.5370                                        | 708   | IPF708       | UNCLASSIFIED PROTEINS                                                               |                                  |
| CA5523 | 1.1 | 1.1 | 1.1 | 1.0 | 1.1 | 1.0 | NIT2         | complemer Nitrilase (by homology) orf19.7279                                 | 2865  | CaNIT2       | Nitrogen and sulphur metabolism                                                     | hydrolase activity               |
| CA5524 | 1.1 | 1.1 | 1.0 | 1.1 | 1.0 | 1.0 | IPF2861      | 16509683..putative pyruvate dehydrogenase orf19.7281                         | 2861  | IPF2861      | Amino acid metabolism                                                               |                                  |
| CA5525 | 1.0 | 1.1 | 1.0 | 1.0 | 1.0 | 1.0 | PEX13        | 16512069..Peroxisome import protein - peroxin 13 orf19.7282                  | 2859  | CaPEX13      | PROTEIN FATE [folding modification destination] ""CELLULAR TRANSPORT                | protein binding                  |
| CA5526 | 1.0 | 1.1 | 1.1 | 1.4 | 1.3 | 1.4 | IPF2857      | complemer unknown function orf19.7284                                        | 2857  | IPF2857      | UNCLASSIFIED PROTEINS                                                               |                                  |
| CA5527 | 1.1 | 1.1 | 1.0 | 0.9 | 1.1 | 1.0 | IPF2856      | complemer unknown function orf19.7285                                        | 2856  | IPF2856      | UNCLASSIFIED PROTEINS                                                               | RNA binding                      |
| CA5528 | 0.9 | 0.9 | 1.0 | 1.0 | 1.1 | 1.0 | RPN7         | complemer Subunit of the regulatory particle of the pre-ribosome orf19.7286  | 2855  | CaRPN7       | PROTEIN FATE [folding modification destination] ""SUBCELLULAR LOCALISATION          | peptidase activity               |
| CA5529 | 1.0 | 1.1 | 1.0 | 1.1 | 0.9 | 1.1 | IPF2852      | 16518952..putative acetyl-coenzyme-A dehydrogenase orf19.7288                | 2852  | IPF2852      | No significant S.c. match                                                           |                                  |
| CA5530 | 1.0 | 1.0 | 1.0 | 1.1 | 1.0 | 1.0 | SPB8         | complemer Suppressor of PAB1 (by homology) orf19.7290                        | 2850  | CaSPB8       | TRANSCRIPTION                                                                       | RNA binding                      |
| CA5531 | 1.1 | 1.0 | 1.0 | 1.0 | 0.9 | 1.0 | GCD14        | 16521513..Translational repressor of GCN4 orf19.7291                         | 2848  | CaGCD14      | PROTEIN SYNTHESIS SUBCELLULAR LOCALISATION                                          | transferase activity             |
| CA5532 | 1.0 | 1.0 | 1.0 | 1.0 | 1.1 | 1.1 | ARP2         | 16522913..actin-like protein (by homology) orf19.7292                        | 2847  | CaARP2       | CELL CYCLE AND DNA PROCESSING CELLULAR TRANSPORT AND TRANSPORT MECHANISMS           | structural molecule activity     |
| CA5533 | 1.0 | 1.1 | 1.0 | 0.9 | 1.0 | 1.0 | IPF2846      | complemer similar to Saccharomyces cerevisiae orf19.7293                     | 2846  | IPF2846      | CELL CYCLE AND DNA PROCESSING                                                       | protein kinase activity          |
| CA5534 | 0.9 | 1.0 | 1.0 | 1.0 | 0.9 | 1.0 | IPF2843      | complemer unknown function orf19.7295                                        | 2843  | IPF2843      | PROTEIN FATE [folding modification destination] ""CELLULAR TRANSPORT                | protein binding                  |
| CA5535 | 1.1 | 1.1 | 1.0 | 0.9 | 0.9 | 0.9 | IPF2839      | complemer unknown function orf19.7296                                        | 2839  | IPF2839      | No significant S.c. match                                                           |                                  |
| CA5536 | 1.1 | 1.1 | 1.0 | 1.1 | 1.0 | 1.1 | IPF2837      | complemer putative cystathionine gamma-synthase orf19.7297                   | 2837  | IPF2837      | Amino acid metabolism                                                               | lyase activity                   |
| CA5537 | 1.0 | 1.0 | 1.0 | 1.1 | 0.9 | 1.0 | CHS2         | complemer Chitin synthase CHITIN SYNTHASE orf19.7298                         | 2836  | CaCHS2       | C-compound and carbohydrate metabolism CELL CYCLE AND DNA PROCESSING                | transferase activity             |
| CA5538 | 0.9 | 0.9 | 1.0 | 1.0 | 1.0 | 0.9 | IPF2830      | 16539029..unknown function orf19.7300                                        | 2830  | IPF2830      | No significant S.c. match                                                           |                                  |

|        |     |     |     |     |     |     |            |                                                        |            |       |            |                                                                                        |                                       |
|--------|-----|-----|-----|-----|-----|-----|------------|--------------------------------------------------------|------------|-------|------------|----------------------------------------------------------------------------------------|---------------------------------------|
| CA5541 | 1.0 | 0.9 | 0.9 | 0.8 | 1.0 | 1.1 | IPF2827    | complemer unknown function                             | orf19.7303 | 2827  | IPF2827    | No significant S.c. match                                                              |                                       |
| CA5542 |     |     |     |     |     |     | IPF19812   | complement(16543967..16545445)                         |            |       |            |                                                                                        |                                       |
| CA5543 | 1.0 | 1.0 | 1.0 | 0.9 | 1.0 | 1.0 | IPF5988    | complemer unknown function                             | orf19.7305 | 5988  | IPF5988    | No significant S.c. match                                                              |                                       |
| CA5544 | 0.9 | 1.0 | 1.1 | 1.0 | 1.1 | 1.0 | IPF5987    | complemer unknown function                             | orf19.7306 | 5987  | IPF5987    | UNCLASSIFIED PROTEINS                                                                  | molecular_function unknown            |
| CA5545 | 1.0 | 0.9 | 1.0 | 1.1 | 0.9 | 1.0 | IPF5986    | complemer similar to cytochrome-b5- and nitre          | orf19.7307 | 5986  | IPF5986    | ENERGY                                                                                 | molecular_function unknown            |
| CA5546 | 0.9 | 0.6 | 0.9 | 0.7 | 0.9 | 0.8 | TUB1.3     | complemer Alpha-1 tubulin, 3-prim alpha-tubul          | orf19.7308 | 5983  | CaTUB1.3   | CELL CYCLE AND DNA PROCESSING SUBCELLULAR LOCALISATIO                                  | structural molecule activity          |
| CA5547 | 1.1 | 1.2 | 1.1 | 1.5 | 1.1 | 1.3 | IPF5981    | complemer similar to Saccharomyces cerevisi            | orf19.7310 | 5981  | IPF5981    | UNCLASSIFIED PROTEINS                                                                  | molecular_function unknown            |
| CA5548 | 1.1 | 1.0 | 1.0 | 1.0 | 1.0 | 1.0 | IPF5978    | 16557890..unknown function                             | orf19.7311 | 5978  | IPF5978    | No significant S.c. match                                                              |                                       |
| CA5549 | 1.0 | 1.0 | 1.0 | 0.9 | 1.0 | 1.0 | ERG13      | complemer 3-hydroxy-3-methylglutaryl coenzy            | orf19.7312 | 5977  | CaERG13    | Lipid fatty-acid and isoprenoid metabolism                                             | transferase activity                  |
| CA5550 | 0.9 | 0.7 | 0.8 | 0.9 | 1.0 | 0.6 | SSU1       | complemer Sulfite sensitivity protein (by homo         | orf19.7313 | 5976  | CaSSU1     | CELL RESCUE DEFENSE AND VIRULENCE ""SUBCELLULAR LOCAL                                  | transporter activity                  |
| CA5551 | 0.7 | 0.4 | 0.5 | 0.3 | 0.6 | 0.2 | IPF5972    | 16565046..putative cysteine dioxygenase (by            | orf19.7314 | 5972  | IPF5972    | No significant S.c. match                                                              |                                       |
| CA5552 | 0.9 | 1.1 | 1.0 | 0.9 | 1.0 | 1.0 | IPF5971    | complemer unknown function                             | orf19.7316 | 5971  | IPF5971    | No significant S.c. match                                                              |                                       |
| CA5553 | 1.0 | 1.0 | 1.0 | 0.9 | 1.1 | 0.9 | IPF1960.3F | complemer putative transcriptional activator, 3        | orf19.7317 | 5969  | IPF1960.3f | Nitrogen and sulphur metabolism TRANSCRIPTION SUBCELLULAR LOCALISATION                 |                                       |
| CA5554 | 1.0 | 1.0 | 1.0 | 1.0 | 1.0 | 1.0 | IPF1960.5F | complemer putative transcriptional activator, 5        | orf19.7318 | 1960  | IPF1960.5f | TRANSCRIPTION SUBCELLULAR LOCALISATION                                                 |                                       |
| CA5555 | 1.0 | 0.9 | 1.0 | 0.9 | 1.0 | 1.0 | SUC1       | 16568981..Putative zinc finger proputative zin         | orf19.7319 | 1962  | CaSUC1     | C-compound and carbohydrate metabolism TRANSCRIPTION                                   | DNA binding                           |
| CA5556 | 1.1 | 1.1 | 1.0 | 1.0 | 1.1 | 1.1 | LIP7       | complemer Secretory lipase secretory li                | orf19.7320 | 1964  | CaLIP7     | Other virulence attributes                                                             |                                       |
| CA5557 | 1.1 | 1.0 | 1.0 | 1.0 | 1.0 | 0.9 | IPF1968    | complemer unknown function                             | orf19.7321 | 1968  | IPF1968    | UNCLASSIFIED PROTEINS                                                                  | molecular_function unknown            |
| CA5558 | 1.1 | 1.1 | 0.9 | 0.8 | 1.1 | 1.0 | IPF1969    | complemer unknown function                             | orf19.7322 | 1969  | IPF1969    | UNCLASSIFIED PROTEINS                                                                  | molecular_function unknown            |
| CA5559 | 1.0 | 0.9 | 0.9 | 0.8 | 1.1 | 1.0 | CBP1       | complemer Corticosteroid binding corticosterc          | orf19.7323 | 1971  | CaCBP1     | Metabolism of vitamins cofactors and prosthetic groups                                 |                                       |
| CA5560 | 1.0 | 0.9 | 1.0 | 1.0 | 1.0 | 1.0 | THI13      | 16579519..Pyrimidine precursor biosynthesis            | orf19.7324 | 1974  | CaTHI13    | Nucleotide metabolism                                                                  | molecular_function unknown            |
| CA5561 | 1.0 | 1.0 | 1.0 | 1.0 | 1.0 | 1.0 | SCO1       | complemer Inner mitochondrial membrane pro             | orf19.7325 | 1975  | CaSCO1     | PROTEIN FATE [folding modification destination] ""REGULATION OF/IN                     | molecular_function unknown            |
| CA5563 | 1.0 | 1.0 | 1.1 | 1.0 | 1.0 | 1.0 | PHO88      | complemer Involved in phosphate transport (b           | orf19.7327 | 1978  | CaPHO88    | Phosphate metabolism                                                                   | transporter activity                  |
| CA5564 | 1.0 | 0.9 | 1.0 | 1.0 | 1.0 | 1.0 | IPF1980    | complemer unknown function                             | orf19.7328 | 1980  | IPF1980    | No significant S.c. match                                                              |                                       |
| CA5565 | 1.1 | 1.1 | 1.0 | 1.0 | 1.1 | 1.0 | QRI8       | 16588317..E2 ubiquitin-conjugation enzyme (            | orf19.7329 | 1981  | CaQRI8     | PROTEIN FATE [folding modification destination] ""CELL RESCUE DE                       | ligase activity                       |
| CA5566 | 0.9 | 1.0 | 1.0 | 1.0 | 1.1 | 1.0 | PET18      | complemer Putative transcriptional regulator (lor      | orf19.7330 | 1983  | CaPET18    | TRANSCRIPTION ""TRANSPOSABLE ELEMENTS VIRAL AND PLASM                                  | molecular_function unknown            |
| CA5567 | 1.0 | 1.0 | 1.1 | 1.1 | 1.0 | 1.0 | FCY24      | 16590399..Putative purine-cytosine transport           | orf19.7331 | 1985  | CaFCY24    | Nucleotide metabolism TRANSPORT FACILITATION                                           |                                       |
| CA5568 | 1.1 | 1.1 | 1.1 | 1.1 | 1.1 | 1.0 | ELF1       | 16592349..Elongation-like factor elongation-           | orf19.7332 | 1989  | CaELF1     | PROTEIN SYNTHESIS TRANSPORT FACILITATION                                               | transporter activity,hydrolase activi |
| CA5569 | 1.0 | 1.0 | 0.9 | 1.0 | 1.0 | 1.0 | PRE8       | 16596456..20S proteasome subunit Y7 (by hcor           | orf19.7335 | 1990  | CaPRE8     | PROTEIN FATE [folding modification destination] ""SUBCELLULAR LOC                      | peptidase activity                    |
| CA5570 | 1.0 | 1.0 | 1.0 | 1.1 | 1.0 | 1.0 | IPF1992    | complemer putative MFS transporter                     | orf19.7336 | 1992  | IPF1992    | CELL RESCUE DEFENSE AND VIRULENCE ""TRANSPORT FACILITATION                             |                                       |
| CA5571 | 1.0 | 1.0 | 1.0 | 1.1 | 1.0 | 1.0 | IPF2001    | 16607554..unknown function                             | orf19.7337 | 2001  | IPF2001    | No significant S.c. match                                                              |                                       |
| CA5572 | 1.0 | 1.0 | 1.0 | 1.2 | 1.0 | 1.0 | BGL22      | complemer endo-beta-1,3-glucanase (by hom              | orf19.7339 | 2004  | CaBGL22    | No significant S.c. match                                                              |                                       |
| CA5573 | 1.1 | 1.0 | 1.1 | 1.0 | 1.0 | 1.0 | IPF2005    | complemer unknown function                             |            | 2005  | IPF2005    | No significant S.c. match                                                              |                                       |
| CA5574 | 0.9 | 1.0 | 0.9 | 1.0 | 1.1 | 0.9 | IPF2007    | complemer unknown function                             | orf19.7341 | 2007  | IPF2007    | No significant S.c. match                                                              |                                       |
| CA5575 | 1.0 | 1.0 | 0.9 | 1.1 | 1.0 | 1.0 | IPF19813   | 16624459..unknown function                             | orf19.7342 | 19813 | IPF19813   | PROTEIN FATE [folding modification destination] ""CELL FATE                            |                                       |
| CA5576 | 1.0 | 0.9 | 1.0 | 1.0 | 1.0 | 1.0 | PRP4       | 16629096..pre-mRNA-processing U4/U6 sma                | orf19.7343 | 12538 | CaPRP4     | TRANSCRIPTION ""PROTEIN FATE [folding modification destination] ""                     | RNA binding                           |
| CA5577 | 1.0 | 1.0 | 1.0 | 1.1 | 1.0 | 1.0 | IPF12537   | 16630917..unknown function                             | orf19.7344 | 12537 | IPF12537   | UNCLASSIFIED PROTEINS                                                                  | molecular_function unknown            |
| CA5578 | 1.0 | 1.0 | 1.1 | 1.0 | 1.0 | 0.9 | IPF12536   | complemer unknown function                             | orf19.7345 | 12536 | IPF12536   | UNCLASSIFIED PROTEINS                                                                  | molecular_function unknown            |
| CA5579 | 1.0 | 1.0 | 1.0 | 1.0 | 1.1 | 1.1 | IPF5661    | complemer unknown function                             | orf19.7125 | 5661  | IPF5661    | No significant S.c. match                                                              |                                       |
| CA5580 | 1.1 | 1.1 | 0.9 | 0.8 | 1.0 | 1.0 | RVS161     | complemer cytoskeletal binding protein (by ho          | orf19.7124 | 5657  | CaRVS161   | CELLULAR TRANSPORT AND TRANSPORT MECHANISMS CELL FA1protein binding                    |                                       |
| CA5581 | 1.1 | 1.1 | 1.0 | 1.0 | 1.0 | 1.0 | RAD3       | complemer DNA helicase/ATPase by homolog               | orf19.7119 | 5649  | CaRAD3     | CELL CYCLE AND DNA PROCESSING TRANSCRIPTION SUBCELLUL DNA binding,helicase activity    |                                       |
| CA5582 | 1.0 | 1.1 | 1.0 | 1.0 | 1.0 | 1.0 | ADK2       | complemer adenylate kinase, mitochondrial (b           | orf19.7118 | 5646  | CaADK2     | Nucleotide metabolism CELL FATE SUBCELLULAR LOCALISATION                               | transferase activity                  |
| CA5583 | 1.0 | 1.1 | 1.0 | 1.0 | 1.1 | 1.1 | IPF5644    | complemer unknown function                             | orf19.7116 | 5644  | IPF5644    | PROTEIN FATE [folding modification destination]                                        | transcription regulator activity      |
| CA5584 | 1.0 | 1.0 | 1.0 | 0.9 | 1.0 | 1.0 | SAC7       | complemer GAP for RHO1 by homology                     | orf19.7115 | 5642  | CaSAC7     | PROTEIN FATE [folding modification destination] ""SUBCELLULAR LOC                      | signal transducer activity            |
| CA5585 | 0.9 | 1.1 | 0.9 | 0.9 | 1.0 | 0.9 | CSA1       | complemer mycelial surface antigenputative ce          | orf19.7114 | 5641  | CaCSA1     | No significant S.c. match                                                              |                                       |
| CA5586 | 1.2 | 1.6 | 1.0 | 1.1 | 1.1 | 1.2 | IPF5625    | 16649726..unknown function                             | orf19.7112 | 5625  | IPF5625    | REGULATION OF/INTERACTION WITH CELLULAR ENVIRONMENT                                    | Other virulence attributes            |
| CA5588 | 1.0 | 1.0 | 1.7 | 1.9 | 1.2 | 1.6 | SOD22.3F   | 16651661..superoxide dismutase, manganese-containing   |            | 5622  | CaSOD22    | CELL RESCUE DEFENSE AND VIRULENCE ""SUBCELLULAR LOCALISATION                           |                                       |
| CA5589 | 0.9 | 0.9 | 1.0 | 1.2 | 1.0 | 0.9 | IPF5621    | 16652423..unknown function                             | orf19.7111 | 5621  | IPF5621    | CONTROL OF CELLULAR ORGANIZATION                                                       | molecular_function unknown            |
| CA5590 | 1.0 | 1.1 | 1.1 | 1.1 | 1.0 | 1.0 | TAD1       | 16652934..Double-stranded rna specific aden            | orf19.7110 | 5619  | CaTAD1     | TRANSCRIPTION                                                                          | hydrolase activity                    |
| CA5591 | 0.9 | 1.0 | 0.9 | 1.0 | 1.0 | 1.0 | IPF5618    | complemer unknown function                             | orf19.7109 | 5618  | IPF5618    | UNCLASSIFIED PROTEINS                                                                  | molecular_function unknown            |
| CA5593 | 1.0 | 1.0 | 0.9 | 0.9 | 0.9 | 1.0 | IPF5615    | 16654858..unknown function                             | orf19.7107 | 5615  | IPF5615    | UNCLASSIFIED PROTEINS                                                                  | molecular_function unknown            |
| CA5594 | 0.9 | 1.0 | 1.0 | 1.0 | 0.9 | 1.0 | IPF19814   | 16656751..folate hydrolase (by homology)               | orf19.7106 | 19814 | IPF19814   | REGULATION OF/INTERACTION WITH CELLULAR ENVIRONMENT                                    | molecular_function unknown            |
| CA5595 | 0.9 | 0.9 | 0.9 | 1.1 | 0.9 | 1.0 | IPF568     | 16659215..similar to Saccharomyces cerevisi            | orf19.7105 | 568   | IPF568     | CELL CYCLE AND DNA PROCESSING REGULATION OF/INTERACTI                                  | enzyme regulator activity             |
| CA5596 | 0.9 | 1.0 | 1.0 | 1.0 | 1.0 | 1.0 | IPF564     | 16661741..unknown function                             | orf19.7104 | 564   | IPF564     | No significant S.c. match                                                              |                                       |
| CA5597 | 1.1 | 1.0 | 0.9 | 1.0 | 0.9 | 1.0 | IPF563     | 16662817..unknown function                             | orf19.7103 | 563   | IPF563     | UNCLASSIFIED PROTEINS                                                                  | molecular_function unknown            |
| CA5598 | 1.0 | 1.0 | 1.0 | 0.9 | 0.9 | 0.9 | IPF562     | complemer unknown function                             | orf19.7101 | 562   | IPF562     | SUBCELLULAR LOCALISATION                                                               | DNA binding                           |
| CA5599 | 1.0 | 1.0 | 0.9 | 0.9 | 0.9 | 1.0 | IPF560     | 16666230..unknown function                             | orf19.7102 | 560   | IPF560     | UNCLASSIFIED PROTEINS                                                                  |                                       |
| CA5600 | 1.0 | 1.0 | 1.0 | 1.0 | 1.0 | 1.0 | IPF559     | 16667458..unknown function                             | orf19.7100 | 559   | IPF559     | TRANSPORT FACILITATION                                                                 | transporter activity                  |
| CA5601 | 0.9 | 1.0 | 0.9 | 1.0 | 1.0 | 0.9 | IPF556     | 16669489..transcriptional regulator (by homol          | orf19.7098 | 556   | IPF556     | TRANSCRIPTION                                                                          | molecular_function unknown            |
| CA5602 | 1.1 | 1.0 | 1.0 | 0.9 | 1.1 | 1.0 | IPF554     | complemer RNA binding protein (by homology             | orf19.7097 | 554   | IPF554     | TRANSCRIPTION                                                                          |                                       |
| CA5603 | 1.0 | 1.0 | 1.0 | 1.0 | 1.1 | 1.0 | IPF553     | complemer unknown function                             | orf19.7096 | 553   | IPF553     | UNCLASSIFIED PROTEINS                                                                  | molecular_function unknown            |
| CA5604 | 1.0 | 1.0 | 1.1 | 0.9 | 1.1 | 1.0 | IPF549     | 16674186..unknown function                             | orf19.7095 | 549   | IPF549     | UNCLASSIFIED PROTEINS                                                                  | molecular_function unknown            |
| CA5605 | 0.9 | 0.9 | 1.0 | 1.1 | 0.9 | 0.9 | SNF31      | 16677266..high-affinity glucose transporter (b         | orf19.7094 | 546   | CaSNF31    | C-compound and carbohydrate metabolism CELLULAR TRANSPORT AND TRANSPORT MECHANISMS F   |                                       |
| CA5606 | 0.9 | 0.9 | 1.0 | 1.0 | 0.9 | 1.0 | STL2.3F    | complemer sugar transporter, 3-prime end (by homology) |            | 542   | CaSTL2.3f  | C-compound and carbohydrate metabolism SUBCELLULAR LOCALISATION TRANSPORT FACILITATION |                                       |
| CA5607 | 0.9 | 1.0 | 1.1 | 1.0 | 1.0 | 1.0 | STL2.5F    | complemer sugar transporter, 5-prime end (by           | orf19.7093 | 541   | CaSTL2.5f  | C-compound and carbohydrate metabolism SUBCELLULAR LOCALISATION TRANSPORT FACILITATION |                                       |
| CA5608 | 1.0 | 1.0 | 1.0 | 1.0 | 1.0 | 1.1 | IPF539     | 16681988..unknown function                             | orf19.7092 | 539   | IPF539     | UNCLASSIFIED PROTEINS                                                                  | molecular_function unknown            |
| CA5609 | 0.8 | 1.0 | 0.9 | 1.2 | 1.0 | 1.0 | IPF538     | complemer unknown function                             | orf19.7091 | 538   | IPF538     | No significant S.c. match                                                              |                                       |
| CA5610 | 1.0 | 1.0 | 1.1 | 1.1 | 1.1 | 0.9 | PMR1       | complemer calcium/mangenease F calcium/ma              | orf19.7089 | 534   | CaPMR1     | CELLULAR TRANSPORT AND TRANSPORT MECHANISMS REGULA                                     | transporter activity                  |
| CA5611 | 1.0 | 1.0 | 1.0 | 0.9 | 1.0 | 1.0 | SUA5       | complemer translation initiation protein (by ho        | orf19.7088 | 529   | CaSUA5     | PROTEIN SYNTHESIS                                                                      | molecular_function unknown            |
| CA5612 | 1.0 | 1.0 | 1.0 | 1.0 | 1.1 | 1.0 | KAP114     | complemer putative RAN-binding protein/impo            | orf19.7086 | 527   | CaKAP114   | PROTEIN FATE [folding modification destination] ""CELLULAR TRANSP                      | protein binding                       |
| CA5613 | 0.9 | 0.7 | 0.7 | 0.9 | 0.6 | 0.9 | IPF525     | complemer unknown function                             | orf19.7085 | 525   | IPF525     | No significant S.c. match                                                              |                                       |
| CA5614 | 0.5 | 0.6 | 0.7 | 0.6 | 0.8 | 0.5 | IPF522     | 16694750..unknown function                             | orf19.7084 | 522   | IPF522     | No significant S.c. match                                                              |                                       |
| CA5615 | 1.0 | 0.9 | 0.9 | 1.0 | 0.9 | 0.9 | IPF520     | 16695958..unknown function                             | orf19.7083 | 520   | IPF520     | CELL CYCLE AND DNA PROCESSING                                                          | molecular_function unknown            |

|        |     |     |     |     |     |     |             |                                                                     |                |                                                                                              |                                               |
|--------|-----|-----|-----|-----|-----|-----|-------------|---------------------------------------------------------------------|----------------|----------------------------------------------------------------------------------------------|-----------------------------------------------|
| CA5616 | 0.9 | 1.0 | 1.0 | 1.0 | 0.9 | 1.0 | PET8        | 16697116..mitochondrial carrier protein (by hcorf19.7082            | 519 CaPET8     | CELLULAR TRANSPORT AND TRANSPORT MECHANISMS TRANSPORTER                                      | transporter activity                          |
| CA5617 | 1.1 | 1.0 | 1.0 | 0.8 | 1.1 | 1.1 | SPL1        | 16698157..tRNA splicing protein tRNA splicing orf19.7081            | 518 CaSPL1     | REGULATION OF/INTERACTION WITH CELLULAR ENVIRONMENT                                          | 5' lyase activity                             |
| CA5618 | 0.9 | 0.9 | 0.9 | 1.1 | 1.1 | 1.1 | LEU2        | 16699837..isopropyl malate dehydrogenase orf19.7080                 | 516 CaLEU2     | Amino acid metabolism SUBCELLULAR LOCALISATION                                               | oxidoreductase activity                       |
| CA5619 | 1.0 | 1.0 | 1.0 | 1.1 | 0.9 | 0.9 | IPF514      | complemer similar to Saccharomyces cerevisiae orf19.7079            | 514 IPF514     | CELL FATE SUBCELLULAR LOCALISATION                                                           | molecular_function unknown                    |
| CA5620 | 1.0 | 1.0 | 0.8 | 0.8 | 1.0 | 1.1 | IPF511      | complemer unknown function orf19.7078                               | 511 IPF511     | No significant S.c. match                                                                    |                                               |
| CA5621 | 0.9 | 0.9 | 1.0 | 1.0 | 1.0 | 1.0 | FRE7        | 16706280..Ferric reductase transmembrane corf19.7077                | 507 CaFRE7     | REGULATION OF/INTERACTION WITH CELLULAR ENVIRONMENT                                          | Oxidoreductase activity                       |
| CA5622 | 1.0 | 0.9 | 1.0 | 1.0 | 1.1 | 1.1 | GBP2.3      | complemer single-strand telomeric DNA-binding orf19.7076            | 506 CaGBP2.3   | PROTEIN FATE [folding modification destination] ""CELLULAR TRANSPORT                         | RNA binding                                   |
| CA5623 | 1.0 | 1.0 | 1.0 | 1.0 | 1.0 | 1.0 | IPF502      | complemer unknown function orf19.7074                               | 502 IPF502     | UNCLASSIFIED PROTEINS                                                                        | molecular_function unknown                    |
| CA5624 | 1.0 | 1.0 | 1.1 | 1.1 | 1.0 | 1.1 | IPF501      | 16711299..unknown function orf19.7073                               | 501 IPF501     | UNCLASSIFIED PROTEINS                                                                        |                                               |
| CA5625 | 1.1 | 1.0 | 1.0 | 1.0 | 1.0 | 1.0 | PEL1        | complemer CDP-diacylglycerol-serine-O-phosphate orf19.7072          | 499 CaPEL1     | Lipid fatty-acid and isoprenoid metabolism ""CELL CYCLE AND DNA PROCESSING                   |                                               |
| CA5626 | 1.0 | 1.0 | 1.0 | 1.0 | 1.0 | 1.1 | IPF498      | 16715125..unknown function orf19.7071                               | 498 IPF498     | Phosphate metabolism CELLULAR TRANSPORT AND TRANSPORT MECHANISMS REGULATION OF/IN            |                                               |
| CA5627 | 1.0 | 1.0 | 1.0 | 1.0 | 1.0 | 1.1 | IPF495      | complemer unknown function orf19.7069                               | 495 IPF495     | UNCLASSIFIED PROTEINS                                                                        | transferase activity                          |
| CA5628 | 1.0 | 1.0 | 1.0 | 1.0 | 1.0 | 0.9 | MAC1        | 16718263..putative metal-binding transcription factor orf19.7068    | 492 CaMAC1     | TRANSCRIPTION                                                                                |                                               |
| CA5629 | 1.0 | 1.1 | 1.0 | 1.1 | 1.0 | 1.0 | CTR9        | 16719856..required for G1 cyclin expression orf19.7067              | 489 CaCTR9     | CELL CYCLE AND DNA PROCESSING SUBCELLULAR LOCALISATION                                       | DNA binding                                   |
| CA5630 | 1.0 | 0.9 | 1.0 | 0.9 | 1.0 | 1.0 | IPF486      | complemer unknown function orf19.7065                               | 486 IPF486     | UNCLASSIFIED PROTEINS                                                                        | DNA binding                                   |
| CA5631 | 1.1 | 1.0 | 1.1 | 1.1 | 1.1 | 1.1 | GLN4        | complemer glutamyl-tRNA synthetase (by hcorf19.7064                 | 485 CaGLN4     | PROTEIN SYNTHESIS SUBCELLULAR LOCALISATION                                                   | ligase activity                               |
| CA5632 | 1.0 | 1.0 | 1.0 | 1.0 | 0.9 | 1.0 | IPF480      | complemer unknown function orf19.7063                               | 480 IPF480     | UNCLASSIFIED PROTEINS                                                                        | molecular_function unknown                    |
| CA5633 | 1.0 | 1.0 | 1.0 | 1.0 | 1.0 | 1.1 | RPA135      | 16727850..DNA-directed RNA polymerase I, orf19.7062                 | 479 CaRPA135   | TRANSCRIPTION SUBCELLULAR LOCALISATION                                                       | nucleoside transferase activity               |
| CA5634 | 0.9 | 1.0 | 0.9 | 1.0 | 0.9 | 1.0 | IPF477      | complemer unknown function orf19.7061                               | 477 IPF477     | UNCLASSIFIED PROTEINS                                                                        | molecular_function unknown                    |
| CA5635 | 1.0 | 1.0 | 1.0 | 1.0 | 1.0 | 1.0 | IPF474      | 16732607..unknown function orf19.7060                               | 474 IPF474     | No significant S.c. match                                                                    |                                               |
| CA5636 | 1.0 | 1.0 | 1.1 | 1.0 | 1.0 | 0.9 | IPF473      | complemer unknown function orf19.7059                               | 473 IPF473     | UNCLASSIFIED PROTEINS                                                                        | molecular_function unknown                    |
| CA5637 | 1.0 | 1.0 | 1.0 | 1.0 | 1.0 | 1.0 | IPF472      | complemer unknown function orf19.7058                               | 472 IPF472     | UNCLASSIFIED PROTEINS                                                                        | molecular_function unknown                    |
| CA5638 | 0.9 | 1.0 | 1.0 | 0.9 | 1.1 | 1.0 | IPF470      | 16737308..putative glutamine-tRNA ligase (by orf19.7057             | 470 IPF470     | PROTEIN SYNTHESIS                                                                            | transferase activity                          |
| CA5639 | 1.0 | 1.1 | 1.0 | 0.9 | 0.9 | 1.0 | DIP53.EXON2 | complemer dicarboxylic amino acid permease orf19.7056               | 469 CaDIP53.e  | No significant S.c. match                                                                    |                                               |
| CA5641 | 1.0 | 0.7 | 1.1 | 1.5 | 1.1 | 1.0 | GAC1        | complemer ser/thr phosphoprotein phosphatase orf19.7053             | 461 CaGAC1     | C-compound and carbohydrate metabolism ENERGY SUBCELLULAR LOCALISATION                       | protein phosphatase activity                  |
| CA5642 | 1.0 | 1.0 | 1.0 | 1.0 | 1.0 | 1.1 | INP52       | complemer phosphatidylinositol phosphate phosphatase orf19.7052     | 451 CaINP52    | Lipid fatty-acid and isoprenoid metabolism ""CONTROL OF CELLULAR                             | (hydrolase activity)                          |
| CA5643 | 1.0 | 1.1 | 1.0 | 0.9 | 1.0 | 1.0 | IPF448      | 16762240..unknown function orf19.7051                               | 448 IPF448     | UNCLASSIFIED PROTEINS                                                                        | molecular_function unknown                    |
| CA5644 | 1.0 | 1.1 | 1.0 | 0.9 | 1.1 | 1.1 | IPF447      | 16763058..unknown function orf19.7050                               | 447 IPF447     | UNCLASSIFIED PROTEINS                                                                        | molecular_function unknown                    |
| CA5645 | 1.1 | 1.2 | 1.0 | 0.9 | 1.0 | 1.0 | CYB5        | 16764907..Cytochrome b5 (by homology) orf19.7049                    | 443 CaCYB5     | Lipid fatty-acid and isoprenoid metabolism                                                   | transporter activity                          |
| CA5646 | 1.1 | 1.1 | 0.8 | 0.8 | 0.9 | 0.9 | RPS28B.3    | 16767339..Ribosomal protein S28B (S33B) (YS27), 3-pri               | 440 CaRPS28B   | UNCLASSIFIED PROTEINS                                                                        | structural molecule activity                  |
| CA5647 | 1.1 | 1.1 | 1.0 | 1.0 | 0.9 | 1.0 | RTF1.5EOC   | 16768246..Nuclear protein regulating DNA binding protein orf19.7048 | 439 CaRTF1.5e  | TRANSCRIPTION SUBCELLULAR LOCALISATION                                                       |                                               |
| CA5648 | 1.1 | 1.0 | 1.0 | 1.0 | 1.0 | 0.9 | UBC6        | 16770989..E2 ubiquitin-conjugating enzyme (by orf19.7347            | 7116 CaUBC6    | PROTEIN FATE [folding modification destination] ""CELL FATE SUBCELLULAR LOCALISATION         |                                               |
| CA5649 | 1.0 | 0.9 | 1.0 | 1.0 | 1.0 | 1.0 | CHS4        | 16776234..Chitin synthase regulating chitin synthase orf19.7349     | 7112 CaCHS4    | C-compound and carbohydrate metabolism CONTROL OF CELLULAR CEN                               | enzyme regulator activity                     |
| CA5650 | 1.0 | 1.1 | 1.0 | 0.8 | 0.9 | 1.0 | IPF7109     | 16780282..unknown function orf19.7350                               | 7109 IPF7109   | UNCLASSIFIED PROTEINS                                                                        | molecular_function unknown                    |
| CA5651 | 1.0 | 1.0 | 1.1 | 1.1 | 1.0 | 1.0 | KIP3        | complemer Kinesin-related protein required for orf19.7353           | 7105 CaKIP3    | CELL CYCLE AND DNA PROCESSING CELLULAR TRANSPORT AND motor activity                          |                                               |
| CA5652 | 1.0 | 1.0 | 1.0 | 1.0 | 1.0 | 1.1 | IPF19815    | complemer longevity-assurance protein (by hcorf19.7354              | 19815 IPF19815 | CELL FATE                                                                                    |                                               |
| CA5653 | 1.0 | 0.9 | 1.0 | 1.1 | 1.1 | 0.9 | SSN8        | complemer C-type cyclin associated with the orf19.7355              | 15544 CaSSN8   | C-compound and carbohydrate metabolism CELL CYCLE AND DNA PROCESSING                         | (transcription regulator activity)            |
| CA5654 | 1.0 | 0.9 | 0.9 | 1.0 | 1.0 | 1.0 | IPF15543    | complemer unknown function orf19.7356                               | 15543 IPF15543 | No significant S.c. match                                                                    |                                               |
| CA5655 | 0.9 | 1.0 | 1.1 | 1.1 | 1.0 | 1.1 | IPF18080    | 16791138..unknown function orf19.7357                               | 18080 IPF18080 | UNCLASSIFIED PROTEINS                                                                        | ligase activity                               |
| CA5656 | 1.0 | 0.9 | 1.0 | 0.9 | 0.9 | 1.1 | IPF14683    | complemer unknown function orf19.7358                               | 14683 IPF14683 | UNCLASSIFIED PROTEINS                                                                        | molecular_function unknown                    |
| CA5657 | 1.1 | 1.0 | 0.9 | 1.0 | 1.0 | 0.9 | IPF14682    | complemer putative transcription factor (by hcorf19.7359            | 14682 IPF14682 | TRANSCRIPTION ""CELL RESCUE DEFENSE AND VIRULENCE ""RE                                       | DNA binding, transcription regulator activity |
| CA5658 | 1.0 | 1.0 | 0.9 | 1.0 | 0.9 | 1.0 | IPF1242     | complemer unknown function orf19.7360                               | 1242 IPF1242   | UNCLASSIFIED PROTEINS                                                                        | molecular_function unknown                    |
| CA5659 | 1.0 | 1.2 | 1.0 | 1.1 | 1.0 | 1.0 | SEN54       | 16799988..tRNA splicing endonuclease alpha orf19.7361               | 1243 CaSEN54   | TRANSCRIPTION SUBCELLULAR LOCALISATION                                                       | RNA binding                                   |
| CA5660 | 1.1 | 1.0 | 1.0 | 1.0 | 0.9 | 1.1 | SKN1.3      | complemer Glucan synthase subunit CaSKN1 [Corf19.7362               | 1245 CaSKN1.3  | C-compound and carbohydrate metabolism CELL FATE CONTROL OF CELLULAR ORGANIZATION SUB        |                                               |
| CA5661 | 1.0 | 1.1 | 1.0 | 1.0 | 1.0 | 0.9 | KRE6        | 16807297..Glucan synthase subunit CaKRE6 [Corf19.7363               | 1249 CaKRE6    | C-compound and carbohydrate metabolism CELL FATE CONTROL OF (hydrolase activity)             |                                               |
| CA5662 | 1.0 | 1.0 | 1.0 | 0.9 | 1.0 | 1.0 | IPF1250     | 16811045..Flavin-containing monooxygenase orf19.7364                | 1250 IPF1250   | Nitrogen and sulphur metabolism                                                              |                                               |
| CA5663 | 0.9 | 0.9 | 1.0 | 1.0 | 0.9 | 1.0 | IPF1251     | 16813355..unknown function orf19.7365                               | 1251 IPF1251   | UNCLASSIFIED PROTEINS                                                                        | molecular_function unknown                    |
| CA5664 | 0.9 | 0.9 | 1.0 | 1.0 | 0.9 | 1.1 | IPF1252     | complemer Conserved hypothetical protein orf19.7366                 | 1252 IPF1252   | UNCLASSIFIED PROTEINS                                                                        | molecular_function unknown                    |
| CA5665 | 1.0 | 1.0 | 1.0 | 1.0 | 1.1 | 1.0 | UBP1        | complemer Ubiquitin-specific protease (by hcorf19.7367              | 1255 CaUBP1    | PROTEIN FATE [folding modification destination] ""SUBCELLULAR LOCALISATION                   | peptidase activity                            |
| CA5666 | 0.9 | 0.9 | 1.0 | 1.0 | 1.0 | 1.1 | PUB1        | complemer Major polyadenylated RNA-binding protein orf19.7368       | 1257 CaPUB1    | TRANSCRIPTION SUBCELLULAR LOCALISATION                                                       |                                               |
| CA5667 | 1.0 | 1.0 | 1.0 | 1.0 | 1.0 | 0.9 | IPF1259     | 16823061..Conserved hypothetical protein orf19.7369                 | 1259 IPF1259   | UNCLASSIFIED PROTEINS                                                                        | transferase activity                          |
| CA5668 | 0.9 | 1.0 | 1.0 | 1.0 | 1.0 | 1.0 | IPF1261     | 16824896..unknown function orf19.7370                               | 1261 IPF1261   | UNCLASSIFIED PROTEINS                                                                        | molecular_function unknown                    |
| CA5669 | 1.1 | 1.0 | 1.0 | 1.0 | 1.0 | 0.9 | IPF1264     | 16826657..unknown function, Asn rich orf19.7371                     | 1264 IPF1264   | TRANSCRIPTION SUBCELLULAR LOCALISATION                                                       |                                               |
| CA5670 | 0.9 | 1.0 | 1.0 | 1.1 | 1.1 | 1.1 | IPF1266     | 16830467..Probable transcription factor orf19.7372                  | 1266 IPF1266   | Lipid fatty-acid and isoprenoid metabolism ""TRANSCRIPTION SUBCELLULAR LOCALISATION          |                                               |
| CA5671 | 1.0 | 1.1 | 1.0 | 1.0 | 1.0 | 0.9 | CTA4        | 16835029..Probable transcription factor orf19.7374                  | 1269 CaCTA4    | Lipid fatty-acid and isoprenoid metabolism ""TRANSCRIPTION SUBCELLULAR LOCALISATION          | DNA binding                                   |
| CA5672 | 1.0 | 0.9 | 1.0 | 0.9 | 1.1 | 1.1 | IPF1271     | complemer Small nuclear ribonucleoprotein (by orf19.7375            | 1271 IPF1271   | TRANSCRIPTION ""PROTEIN FATE [folding modification destination] ""                           |                                               |
| CA5673 | 1.0 | 1.0 | 1.1 | 1.0 | 1.0 | 0.9 | IPF1272     | 16838990..unknown function orf19.7376                               | 1272 IPF1272   | TRANSCRIPTION                                                                                |                                               |
| CA5674 | 0.9 | 0.9 | 1.0 | 1.0 | 1.0 | 1.0 | IPF1274     | 16841646..similar to Saccharomyces cerevisiae orf19.7377            | 1274 IPF1274   | CELL CYCLE AND DNA PROCESSING SUBCELLULAR LOCALISATION                                       | protein binding                               |
| CA5675 | 1.0 | 0.9 | 0.9 | 0.9 | 1.0 | 1.1 | SIS2        | complemer Involved in cell cycle-specific gene orf19.7378           | 1276 CaSIS2    | CELL CYCLE AND DNA PROCESSING TRANSCRIPTION SUBCELLULAR LOCALISATION                         | enzyme regulator activity                     |
| CA5676 | 1.0 | 1.0 | 0.9 | 1.0 | 1.0 | 0.9 | FAA22       | complemer Long-chain-fatty-acid--CoA ligase orf19.7379              | 1278 CaFAA22   | Lipid fatty-acid and isoprenoid metabolism ""CELLULAR TRANSPORT AND TRANSPORT MECHANISMS     |                                               |
| CA5677 | 1.0 | 1.0 | 1.0 | 0.8 | 1.0 | 0.9 | IPF1286     | complemer unknown function orf19.7380                               | 1286 IPF1286   | No significant S.c. match                                                                    |                                               |
| CA5678 | 1.0 | 0.9 | 1.0 | 1.0 | 0.9 | 1.0 | IPF1292     | 16863716..unknown function Hypothetical protein orf19.7381          | 1292 IPF1292   | Amino acid metabolism Nitrogen and sulphur metabolism TRANSCRIPTION SUBCELLULAR LOCALISATION |                                               |
| CA5680 | 1.0 | 1.0 | 1.0 | 1.0 | 1.0 | 0.9 | CAM1.EXON2  | 16867852..translation elongation factor eEF1 orf19.7382             | 1299 CaCAM1.e  | PROTEIN SYNTHESIS SUBCELLULAR LOCALISATION                                                   |                                               |
| CA5681 | 1.1 | 1.0 | 0.9 | 1.0 | 1.1 | 1.0 | MNN9        | 16869877..Required for complex I MnN9p [Ca orf19.7383               | 1301 CaMNN9    | C-compound and carbohydrate metabolism ""PROTEIN FATE [folding modification destination] ""  | transferase activity                          |
| CA5682 | 1.0 | 1.0 | 1.0 | 1.1 | 1.0 | 1.1 | NOG1        | 16871390..Nucleolar G-protein (by homology) orf19.7384              | 1302 CaNOG1    | UNCLASSIFIED PROTEINS                                                                        | hydrolase activity                            |
| CA5683 | 1.1 | 1.0 | 1.0 | 0.9 | 1.0 | 0.9 | IPF3333     | 16874917..unknown function orf19.7385                               | 3333 IPF3333   | UNCLASSIFIED PROTEINS                                                                        | molecular_function unknown                    |
| CA5684 | 1.0 | 0.9 | 0.9 | 1.0 | 1.0 | 1.0 | IPF3331     | complemer unknown function orf19.7386                               | 3331 IPF3331   | ENERGY ""PROTEIN FATE [folding modification destination] ""SUBCELLULAR LOCALISATION          | molecular_function unknown                    |
| CA5685 | 1.0 | 1.0 | 1.0 | 1.0 | 1.1 | 1.0 | HPA1        | 16877752..RNA polymerase II-associated His orf19.7387               | 3330 CaHPA1    | CELL CYCLE AND DNA PROCESSING ""PROTEIN FATE [folding modification destination] ""           | transcription regulator activity              |
| CA5686 | 1.0 | 1.0 | 1.0 | 1.0 | 1.1 | 1.1 | IPF3329     | complemer similar to Saccharomyces cerevisiae orf19.7388            | 3329 IPF3329   | C-compound and carbohydrate metabolism ""CELL RESCUE DEFENSE                                 | protein kinase activity                       |
| CA5687 | 0.9 | 1.0 | 1.0 | 1.0 | 1.1 | 1.0 | REV3.5F     | 16881763..DNA-directed DNA polymerase ze orf19.7389                 | 3327 CaREV3.5i | CELL CYCLE AND DNA PROCESSING SUBCELLULAR LOCALISATION                                       | nucleoside transferase activity               |
| CA5689 | 1.0 | 1.1 | 0.9 | 0.9 | 1.0 | 0.9 | REV3.3F     | 16885545..DNA-directed DNA polymerase ze orf19.7390                 | 3325 CaREV3.3i | CELL CYCLE AND DNA PROCESSING SUBCELLULAR LOCALISATION                                       |                                               |
| CA5690 | 1.0 | 1.0 | 1.0 | 1.0 | 1.0 | 0.9 | OCH1        | complemer Alpha-1,6-mannosyltransferase orf19.7391                  | 3324 CaOCH1    | C-compound and carbohydrate metabolism ""PROTEIN FATE [folding modification destination] ""  | transferase activity                          |

|        |     |     |     |     |     |     |              |                                                              |            |                  |                                                                                            |
|--------|-----|-----|-----|-----|-----|-----|--------------|--------------------------------------------------------------|------------|------------------|--------------------------------------------------------------------------------------------|
| CA5691 | 1.0 | 1.1 | 1.0 | 1.1 | 1.1 | 1.0 | DED1         | complemer RNA helicase (by homology)                         | orf19.7392 | 3320 CaDED1      | TRANSCRIPTION PROTEIN SYNTHESIS SUBCELLULAR LOCALISAT RNA binding                          |
| CA5692 | 1.0 | 1.0 | 1.0 | 1.0 | 1.0 | 0.9 | UTR1         | complemer Associated with ferric reductase ac                | orf19.7393 | 3316 CaUTR1      | REGULATION OF/INTERACTION WITH CELLULAR ENVIRONMENT transferase activity                   |
| CA5693 | 1.0 | 0.9 | 1.0 | 0.9 | 1.0 | 1.0 | GDA1         | complemer Golgi guanosine diph:guanosine                     | orf19.7394 | 3313 CaGDA1      | PROTEIN FATE [folding modification destination] ""SUBCELLULAR LOC                          |
| CA5694 | 0.9 | 1.0 | 1.0 | 1.0 | 1.0 | 0.9 | IPF3311      | 16898207..unknown function                                   | orf19.7396 | 3311 IPF3311     | No significant S.c. match                                                                  |
| CA5695 | 1.1 | 1.0 | 1.0 | 1.0 | 1.0 | 1.0 | IPF3310      | 16900279..unknown function                                   | orf19.7397 | 3310 IPF3310     | UNCLASSIFIED PROTEINS                                                                      |
| CA5696 | 1.0 | 1.0 | 1.0 | 1.0 | 1.1 | 1.1 | IPF3309.3EOC | complemer unknown function, 3-prime end                      | orf19.7398 | 3309 IPF3309.3   | UNCLASSIFIED PROTEINS                                                                      |
| CA5697 | 0.9 | 1.0 | 0.8 | 0.9 | 0.9 | 1.0 | IPF18076.3F  | complemer thiol-specific antioxidant-like protein, 3-prime e | orf19.7400 | 18076 IPF18076.3 | CELL RESCUE DEFENSE AND VIRULENCE ""SUBCELLULAR LOCALISATION                               |
| CA5699 | 1.0 | 1.0 | 0.9 | 1.0 | 1.1 | 0.9 | ALS7         | complemer agglutinin-like protein                            | orf19.7400 | 19816 CaALS7     | SUBCELLULAR LOCALISATION Other virulence attributes                                        |
| CA5700 | 1.1 | 1.0 | 0.9 | 1.0 | 1.1 | 0.9 | IPF2630      | 16916566..unknown function                                   |            | 2630 IPF2630     | No significant S.c. match                                                                  |
| CA5701 | 1.0 | 1.0 | 1.0 | 1.1 | 1.0 | 1.0 | ISW2         | 16917025..Chromatin remodeling complex (b)                   | orf19.7401 | 2633 CaISW2      | TRANSCRIPTION                                                                              |
| CA5702 | 1.0 | 1.1 | 0.9 | 0.9 | 1.0 | 1.0 | PCH1         | complemer Putative ATPase (by homology)                      | orf19.7402 | 2639 CaPCH1      | CELL CYCLE AND DNA PROCESSING                                                              |
| CA5703 | 1.0 | 1.0 | 1.0 | 1.0 | 0.9 | 0.9 | IPF2463      | complemer unknown function                                   | orf19.7403 | 2643 IPF2463     | UNCLASSIFIED PROTEINS                                                                      |
| CA5704 | 1.1 | 1.1 | 1.0 | 1.0 | 1.0 | 1.0 | CHA11        | complemer L-serine/L-threonine deaminase (b                  | orf19.7404 | 2644 CaCHA11     | Amino acid metabolism                                                                      |
| CA5705 | 1.0 | 1.0 | 0.9 | 1.0 | 1.0 | 0.9 | IPF2645      | 16929431..unknown function                                   | orf19.7405 | 2645 IPF2645     | No significant S.c. match                                                                  |
| CA5706 | 0.9 | 1.0 | 1.0 | 1.0 | 1.0 | 0.9 | IPF2649      | 16930675..unknown function                                   | orf19.7406 | 2649 IPF2649     | REGULATION OF/INTERACTION WITH CELLULAR ENVIRONMENT Other virulence attributes             |
| CA5707 | 1.0 | 0.9 | 0.9 | 0.9 | 1.0 | 1.0 | ERV25        | complemer Component of COPII-coated vesic                    | orf19.7409 | 2651 CaERV25     | CELLULAR TRANSPORT AND TRANSPORT MECHANISMS SUBCELL                                        |
| CA5708 | 1.0 | 1.0 | 0.9 | 0.9 | 0.9 | 1.0 | MRPL39       | 16933753..Mitochondrial 60S ribosomal protein (by hom        | orf19.7410 | 2652 CaMRPL39    | PROTEIN SYNTHESIS SUBCELLULAR LOCALISATION UNCLASSIFIED                                    |
| CA5709 | 0.9 | 1.0 | 1.0 | 1.0 | 1.0 | 1.0 | IPF2653      | complemer unknown function                                   | orf19.7410 | 2653 IPF2653     | UNCLASSIFIED PROTEINS                                                                      |
| CA5710 | 1.0 | 0.9 | 1.0 | 1.0 | 1.0 | 1.0 | OAC1         | 16937716..Mitochondrial oxaloacetate transp                  | orf19.7411 | 2654 CaOAC1      | CELLULAR TRANSPORT AND TRANSPORT MECHANISMS SUBCELL                                        |
| CA5711 | 1.1 | 1.1 | 1.0 | 1.0 | 1.0 | 1.0 | MUB1         | 16939227..Regulation of bud site selection (b                | orf19.7412 | 2656 CaMUB1      | CELL FATE                                                                                  |
| CA5712 | 1.0 | 0.9 | 1.0 | 1.0 | 0.9 | 1.0 | IPF2657      | 16941769..unknown function                                   | orf19.7413 | 2657 IPF2657     | CELL CYCLE AND DNA PROCESSING                                                              |
| CA5713 | 0.9 | 1.0 | 1.1 | 0.9 | 1.0 | 1.0 | ALS6         | 16946732..agglutinin-like protein agglutinin-I               | orf19.7414 | 2663 CaALS6      | CELL FATE SUBCELLULAR LOCALISATION Other virulence attributes                              |
| CA5714 | 1.0 | 0.7 | 0.5 | 0.5 | 0.5 | 1.2 | IPF2431      | 16952072..similar to Saccharomyrthiol-specifi                | orf19.7417 | 2431 IPF2431     | CELL RESCUE DEFENSE AND VIRULENCE ""SUBCELLULAR LOCAL                                      |
| CA5715 | 1.0 | 1.0 | 0.9 | 0.9 | 0.9 | 1.0 | HNT2         | 16952914..Diadenosine polyphosphate hydro                    | orf19.7419 | 2434 CaHNT2      | Nucleotide metabolism                                                                      |
| CA5716 | 1.0 | 1.1 | 1.0 | 1.1 | 1.0 | 1.0 | MED6         | 16953576..RNA polymerase II transcriptional                  | orf19.7420 | 2436 CaMED6      | TRANSCRIPTION SUBCELLULAR LOCALISATION                                                     |
| CA5717 | 1.0 | 1.0 | 1.0 | 0.9 | 1.0 | 1.3 | CYP51        | complemer Cyclophilin - peptidylprolyl cis-tran              | orf19.7421 | 2438 CaCYP51     | PROTEIN FATE [folding modification destination] ""SUBCELLULAR LOC                          |
| CA5718 | 1.0 | 1.0 | 1.0 | 1.0 | 1.1 | 1.1 | LCP5         | complemer Ngg1p interacting protein (by hom                  | orf19.7422 | 2440 CaLCP5      | TRANSCRIPTION                                                                              |
| CA5719 | 1.0 | 1.0 | 1.0 | 0.9 | 0.9 | 1.0 | IPF2441      | 16956623..unknown function                                   | orf19.7424 | 2441 IPF2441     | UNCLASSIFIED PROTEINS                                                                      |
| CA5720 | 0.9 | 0.9 | 1.0 | 0.9 | 0.9 | 1.0 | UNG1         | complemer Uracil-DNA glycosylase (by homol                   | orf19.7425 | 2442 CaUNG1      | CELL CYCLE AND DNA PROCESSING SUBCELLULAR LOCALISATIO                                      |
| CA5721 | 1.0 | 0.9 | 1.0 | 1.1 | 1.1 | 1.0 | IPF2443      | complemer similar to Saccharomyces cerevisi                  | orf19.7426 | 2443 IPF2443     | C-compound and carbohydrate metabolism ""PROTEIN FATE [folding m                           |
| CA5722 | 1.0 | 0.9 | 0.9 | 1.0 | 1.0 | 1.0 | IPF2446      | complemer unknown function                                   | orf19.7427 | 2446 IPF2446     | UNCLASSIFIED PROTEINS                                                                      |
| CA5723 | 0.9 | 0.9 | 1.1 | 1.0 | 1.1 | 1.1 | APN1         | 16962169..AP endonuclease, exonuclease III                   | orf19.7428 | 2448 CaAPN1      | CELL CYCLE AND DNA PROCESSING SUBCELLULAR LOCALISATIO                                      |
| CA5724 | 1.0 | 0.9 | 1.0 | 1.0 | 1.0 | 1.1 | NUP116       | 16963243..nuclear pore protein (by homology)                 | orf19.7433 | 19817 CaNUP116   | TRANSCRIPTION CELLULAR TRANSPORT AND TRANSPORT MECH                                        |
| CA5725 | 1.0 | 1.0 | 0.9 | 0.9 | 1.1 | 1.0 | GLG2         | 16967618..Self-glucosylating initiator of glyco              | orf19.7434 | 2460 CaGLG2      | C-compound and carbohydrate metabolism ENERGY                                              |
| CA5726 | 1.0 | 0.9 | 1.0 | 0.9 | 0.9 | 1.0 | AAF1         | 16976907..Adhesion and aggrega AAF1 Leng                     | orf19.7436 | 2468 CaAAF1      | No significant S.c. match                                                                  |
| CA5727 | 1.0 | 1.0 | 1.0 | 1.0 | 1.0 | 0.9 | ECM15        | complemer Involved in cell wall biogenesis and architectu    | orf19.7440 | 2469 CaECM15     | C-compound and carbohydrate metabolism CONTROL OF CELLULAR C                               |
| CA5728 | 1.0 | 1.0 | 1.0 | 1.0 | 1.1 | 1.0 | IPF2471      | 16981597..maltose acetyltransferase                          | orf19.7437 | 2471 IPF2471     | C-compound and carbohydrate metabolism                                                     |
| CA5729 | 1.0 | 1.0 | 1.1 | 0.9 | 1.0 | 1.0 | UBA1         | 16982761..Ubiquitin-activating enzyme (by ho                 | orf19.7438 | 2475 CaUBA1      | PROTEIN FATE [folding modification destination] ""CELL RESCUE DEFENSE AND VIRULENCE ""SUBC |
| CA5730 | 1.0 | 1.0 | 1.0 | 1.1 | 1.1 | 1.0 | HST6         | complemer ATP binding cassette 6 ATP bindin                  | orf19.7440 | 2479 CaHST6      | CELLULAR TRANSPORT AND TRANSPORT MECHANISMS CELL FA1                                       |
| CA5731 | 1.0 | 0.9 | 1.0 | 1.0 | 1.0 | 1.0 | IPF2870      | complemer unknown function                                   | orf19.7441 | 2870 IPF2870     | UNCLASSIFIED PROTEINS                                                                      |
| CA5733 | 1.0 | 1.0 | 1.0 | 1.0 | 0.9 | 1.0 | IPF2873      | 16991767..unknown function                                   | orf19.7443 | 2873 IPF2873     | No significant S.c. match                                                                  |
| CA5734 | 1.0 | 1.0 | 1.0 | 1.0 | 0.9 | 1.0 | IPF20029     | complemer unknown function                                   | orf19.7444 | 20029 IPF20029   | UNCLASSIFIED PROTEINS                                                                      |
| CA5735 | 1.1 | 1.1 | 0.9 | 1.0 | 1.1 | 1.1 | IPF2878      | 16996010..unknown function                                   | orf19.7445 | 2878 IPF2878     | PROTEIN FATE [folding modification destination] ""CELLULAR TRANSP                          |
| CA5736 | 0.9 | 1.0 | 1.1 | 1.0 | 1.1 | 1.0 | OPI3         | complemer Methylene-fatty-acyl-phospholipid                  | orf19.7446 | 2880 CaOPI3      | Lipid fatty-acid and isoprenoid metabolism ""SUBCELLULAR LOCALISA                          |
| CA5737 | 0.9 | 1.0 | 1.0 | 1.1 | 1.0 | 0.9 | JEN1         | 17001627..Carboxylic acid transporter protein                | orf19.7447 | 2882 CaJEN1      | C-compound and carbohydrate metabolism TRANSPORT FACILITATIO                               |
| CA5738 | 1.1 | 1.1 | 1.1 | 1.0 | 1.1 | 1.0 | LYS9         | 17003715..Lysine biosynthesis (by homology)                  | orf19.7448 | 2883 CaLYS9      | Amino acid metabolism SUBCELLULAR LOCALISATION                                             |
| CA5739 | 1.0 | 1.0 | 0.9 | 1.1 | 1.0 | 1.0 | IPF2884      | complemer unknown function                                   | orf19.7449 | 2884 IPF2884     | UNCLASSIFIED PROTEINS                                                                      |
| CA5740 | 0.9 | 0.9 | 1.0 | 1.0 | 1.0 | 1.0 | IPF20030     | 17007896..unknown function                                   | orf19.7450 | 20030 IPF20030   | UNCLASSIFIED PROTEINS                                                                      |
| CA5741 | 1.0 | 1.0 | 0.9 | 1.0 | 0.9 | 0.9 | IPF2891      | 17010126..unknown function                                   |            | 2891 IPF2891     | No significant S.c. match                                                                  |
| CA5742 | 1.1 | 1.1 | 1.0 | 1.0 | 1.0 | 0.9 | FUN31        | 17010633..Serine/threonine kinase (by homol                  | orf19.7451 | 2894 CaFUN31     | UNCLASSIFIED PROTEINS                                                                      |
| CA5743 | 0.9 | 1.0 | 1.0 | 1.0 | 1.0 | 0.9 | IPF2895      | 17015039..unknown function                                   | orf19.7452 | 2895 IPF2895     | UNCLASSIFIED PROTEINS                                                                      |
| CA5744 | 1.0 | 1.1 | 1.0 | 0.9 | 1.0 | 0.9 | IPF2898      | 17017475..unknown function                                   | orf19.7453 | 2898 IPF2898     | No significant S.c. match                                                                  |
| CA5745 | 0.9 | 1.0 | 1.0 | 1.0 | 1.0 | 0.9 | TAF60        | complemer TATA-binding protein-associated-f                  | orf19.7454 | 2900 CaTAF60     | TRANSCRIPTION SUBCELLULAR LOCALISATION                                                     |
| CA5746 | 1.0 | 1.0 | 1.0 | 1.0 | 0.9 | 1.0 | IPF2902      | complemer unknown function                                   | orf19.7455 | 2902 IPF2902     | UNCLASSIFIED PROTEINS                                                                      |
| CA5747 | 1.0 | 1.1 | 1.1 | 1.0 | 1.0 | 1.0 | IPF2903      | complemer unknown function                                   | orf19.7456 | 2903 IPF2903     | No significant S.c. match                                                                  |
| CA5748 | 1.0 | 1.1 | 1.0 | 1.0 | 1.0 | 1.0 | IPF2905      | complemer unknown function                                   | orf19.7457 | 2905 IPF2905     | No significant S.c. match                                                                  |
| CA5749 | 1.0 | 1.0 | 1.0 | 1.1 | 1.0 | 1.0 | IPF2908      | complemer unknown function                                   | orf19.7459 | 2908 IPF2908     | CELL CYCLE AND DNA PROCESSING                                                              |
| CA5750 | 1.0 | 0.9 | 1.0 | 1.1 | 1.0 | 1.0 | CHS21        | complemer Chitin synthase (by homology)                      | orf19.5384 | 11660 CaCHS21    | C-compound and carbohydrate metabolism CELL CYCLE AND DNA PROCESSING CELL FATE SUBCELL     |
| CA5751 | 0.9 | 1.0 | 1.0 | 1.0 | 1.0 | 1.0 | VPS8         | complemer Vacuolar sorting protein (by homol                 | orf19.5387 | 11663 CaVPS8     | PROTEIN FATE [folding modification destination] ""CELLULAR TRANSP                          |
| CA5752 | 1.0 | 1.0 | 1.0 | 1.1 | 1.1 | 1.1 | IPF1055      | 17040426..unknown function                                   | orf19.5388 | 1055 IPF1055     | CELL CYCLE AND DNA PROCESSING TRANSCRIPTION                                                |
| CA5753 | 0.9 | 0.9 | 1.0 | 1.1 | 1.0 | 1.0 | FKH1         | 17043418..Fork head protein type transcripti                 | orf19.5389 | 1059 CaFKH1      | TRANSCRIPTION SUBCELLULAR LOCALISATION                                                     |
| CA5754 | 1.0 | 1.1 | 1.0 | 1.0 | 1.0 | 1.0 | IPF1060      | 17045114..unknown function, Asn rich                         | orf19.5390 | 1060 IPF1060     | No significant S.c. match                                                                  |
| CA5755 | 1.0 | 1.0 | 0.9 | 1.1 | 1.0 | 1.0 | IPF1063      | complemer Spliceosomal protein SAP 130 (by orf               | orf19.5391 | 1063 IPF1063     | TRANSCRIPTION CELLULAR TRANSPORT AND TRANSPORT MECH                                        |
| CA5756 | 1.0 | 1.0 | 1.0 | 1.0 | 0.9 | 1.0 | IPF1065      | complemer unknown function                                   | orf19.5392 | 1065 IPF1065     | CELL RESCUE DEFENSE AND VIRULENCE ""TRANSPORT FACILITATION                                 |
| CA5757 | 1.0 | 0.9 | 1.0 | 1.0 | 1.0 | 1.1 | IPF1067      | complemer Putative glutamate decarboxylase                   | orf19.5393 | 1067 IPF1067     | No significant S.c. match                                                                  |
| CA5758 | 1.0 | 1.0 | 1.1 | 1.0 | 1.0 | 1.0 | IPF1069      | complemer similar to Saccharomyces cerevisi                  | orf19.5395 | 1069 IPF1069     | ENERGY                                                                                     |
| CA5759 | 1.0 | 1.0 | 0.9 | 0.8 | 1.0 | 1.0 | PET191.3     | 17059892..Assembly of cytochrome oxidase, 3-prime enc        | orf19.5397 | 1071 CaPET191    | ENERGY ""PROTEIN FATE [folding modification destination] ""SUBCELL                         |
| CA5760 | 1.0 | 1.0 | 1.0 | 1.0 | 1.0 | 1.1 | IPF1072      | complemer unknown function                                   | orf19.5397 | 1072 IPF1072     | UNCLASSIFIED PROTEINS                                                                      |
| CA5761 | 0.9 | 0.9 | 1.1 | 1.0 | 1.0 | 1.0 | IFF11        | complemer unknown function                                   | orf19.5399 | 1076 CaIFF11     | No significant S.c. match                                                                  |
| CA5762 | 1.0 | 1.0 | 1.0 | 1.0 | 1.0 | 0.9 | IPF1084.3    | complemer unknown function, 3-prime end                      | orf19.5401 | 1084 IPF1084.3   | SUBCELLULAR LOCALISATION                                                                   |
| CA5763 | 0.9 | 1.0 | 1.0 | 1.1 | 1.0 | 0.9 | IFF10.5      | complemer unknown function, 5-prime end                      | orf19.5404 | 1089 CaIFF10.5   | No significant S.c. match                                                                  |
| CA5764 | 0.9 | 0.9 | 1.0 | 0.9 | 1.0 | 1.1 | IPF20031     | 17073688..similar to Saccharomyces cerevisi                  | orf19.5406 | 20031 IPF20031   | PROTEIN FATE [folding modification destination]                                            |

|        |     |     |     |     |     |     |            |                                                |            |       |            |                                                                                                     |                                    |
|--------|-----|-----|-----|-----|-----|-----|------------|------------------------------------------------|------------|-------|------------|-----------------------------------------------------------------------------------------------------|------------------------------------|
| CA5765 | 1.0 | 0.9 | 1.0 | 1.1 | 0.9 | 1.0 | SOF1       | 17075690..Involved in 18S pre-rRNA producti    | orf19.5407 | 1095  | CaSOF1     | TRANSCRIPTION SUBCELLULAR LOCALISATION                                                              | RNA binding                        |
| CA5766 | 1.0 | 1.0 | 0.9 | 1.0 | 1.0 | 1.1 | IPF1097    | 17078448..serine/threonine protein kinase (by  | orf19.5408 | 1097  | IPF1097    | UNCLASSIFIED PROTEINS                                                                               | protein kinase activity            |
| CA5767 | 0.9 | 0.9 | 1.1 | 1.0 | 0.9 | 0.9 | IPF1098    | 17080829..unknown function                     | orf19.5409 | 1098  | IPF1098    | UNCLASSIFIED PROTEINS                                                                               | molecular_function unknown         |
| CA5768 | 1.0 | 1.0 | 1.0 | 1.0 | 1.0 | 1.0 | PAC1       | 17082296..Similarity to human LIS-1 protein (  | orf19.5410 | 1099  | CaPAC1     | UNCLASSIFIED PROTEINS                                                                               | molecular_function unknown         |
| CA5769 | 1.0 | 1.0 | 1.0 | 1.0 | 1.1 | 1.1 | UBC12      | complemer E2 ubiquitin-conjugating enzyme (    | orf19.5411 | 1101  | CaUBC12    | PROTEIN FATE [folding modification destination]                                                     |                                    |
| CA5770 | 1.0 | 0.9 | 1.0 | 1.1 | 1.0 | 1.0 | IPF1103    | complemer unknown function                     | orf19.5412 | 1103  | IPF1103    | CONTROL OF CELLULAR ORGANIZATION                                                                    | molecular_function unknown         |
| CA5771 | 1.0 | 1.0 | 1.0 | 1.0 | 0.9 | 1.0 | IPF1104    | 17085835..similar to Saccharomyces cerevisi    | orf19.5413 | 1104  | IPF1104    | UNCLASSIFIED PROTEINS                                                                               | molecular_function unknown         |
| CA5772 | 0.9 | 1.0 | 1.0 | 1.1 | 1.0 | 0.9 | ESA1       | complemer Histone acetyltransferase (by hom    | orf19.5416 | 1107  | CaESA1     | CELL CYCLE AND DNA PROCESSING ""PROTEIN FATE [folding modifi                                        | transferase activity               |
| CA5773 | 1.0 | 1.0 | 0.9 | 1.0 | 1.0 | 1.0 | DOT5       | 17089881..Derepression of telomeric silencin   | orf19.5417 | 1111  | CaDOT5     | TRANSCRIPTION                                                                                       | oxidoreductase activity            |
| CA5774 | 1.2 | 1.0 | 1.0 | 1.0 | 1.1 | 1.0 | IPF1113    | complemer unknown function                     | orf19.5418 | 1113  | IPF1113    | UNCLASSIFIED PROTEINS                                                                               | molecular_function unknown         |
| CA5775 | 1.0 | 1.1 | 0.9 | 0.8 | 1.0 | 1.2 | ATP5       | complemer F1F0-ATPase complex, OSCP sub        | orf19.5419 | 1114  | CaATP5     | ENERGY CELLULAR TRANSPORT AND TRANSPORT MECHANISMS                                                  | structural molecule activity       |
| CA5776 | 1.0 | 1.0 | 1.0 | 0.9 | 1.0 | 1.0 | RML2       | 17093624..Ribosomal L2 protein, mitochondri    | orf19.5420 | 1116  | CaRML2     | PROTEIN SYNTHESIS SUBCELLULAR LOCALISATION                                                          | structural molecule activity       |
| CA5777 | 1.0 | 1.0 | 0.9 | 1.0 | 0.9 | 1.0 | IPF1118    | complemer unknown function                     | orf19.5422 | 1118  | IPF1118    | No significant S.c. match                                                                           |                                    |
| CA5778 | 1.0 | 1.1 | 1.0 | 1.0 | 1.0 | 0.9 | IPF1119    | complemer unknown function                     | orf19.5423 | 1119  | IPF1119    | CELL CYCLE AND DNA PROCESSING CONTROL OF CELLULAR ORG                                               | DNA binding,nucleotidyltransferase |
| CA5779 | 1.1 | 1.0 | 1.1 | 1.0 | 1.0 | 1.0 | IPF1121    | complemer unknown function                     | orf19.5425 | 1121  | IPF1121    | UNCLASSIFIED PROTEINS                                                                               | RNA binding                        |
| CA5780 | 1.1 | 1.0 | 1.0 | 1.0 | 1.0 | 0.9 | IPF1123    | 17099376..unknown function                     | orf19.5426 | 1123  | IPF1123    | UNCLASSIFIED PROTEINS                                                                               | molecular_function unknown         |
| CA5781 | 0.9 | 1.0 | 0.9 | 1.1 | 1.0 | 1.0 | IPF1126    | complemer unknown function                     | orf19.5428 | 1126  | IPF1126    | CELL RESCUE DEFENSE AND VIRULENCE ""REGULATION OF/INTE                                              | transporter activity               |
| CA5782 | 1.1 | 1.1 | 1.0 | 1.0 | 0.9 | 0.9 | IPF1127    | 17103226..unknown function                     | orf19.5429 | 1127  | IPF1127    | UNCLASSIFIED PROTEINS                                                                               | molecular_function unknown         |
| CA5783 | 1.0 | 1.0 | 1.1 | 1.0 | 1.0 | 0.9 | IPF1128    | 17105376..unknown function                     | orf19.5430 | 1128  | IPF1128    | No significant S.c. match                                                                           |                                    |
| CA5784 | 1.1 | 1.0 | 1.0 | 1.0 | 1.0 | 0.9 | IPF1129    | complemer unknown function                     | orf19.5431 | 1129  | IPF1129    | No significant S.c. match                                                                           |                                    |
| CA5785 | 1.0 | 1.0 | 0.9 | 1.1 | 1.0 | 1.0 | TPT1       | complemer tRNA 2 -phosphotransferase (by h     | orf19.5432 | 1133  | CaTPT1     | TRANSCRIPTION                                                                                       | transferase activity               |
| CA5786 | 0.9 | 1.0 | 1.0 | 0.9 | 1.0 | 1.0 | IPF1134    | complemer unknown function                     | orf19.5433 | 1134  | IPF1134    | UNCLASSIFIED PROTEINS                                                                               | molecular_function unknown         |
| CA5787 | 1.0 | 1.0 | 1.0 | 1.0 | 1.0 | 1.0 | IPF1136    | complemer unknown function                     | orf19.5436 | 1136  | IPF1136    | UNCLASSIFIED PROTEINS                                                                               | RNA binding                        |
| CA5788 | 1.0 | 1.0 | 1.3 | 1.2 | 1.2 | 1.1 | RHR2       | complemer DL-glycerol phosphatase              | orf19.5437 | 1139  | CARHR2     | C-compound and carbohydrate metabolism                                                              | hydrolase activity                 |
| CA5789 | 1.0 | 1.0 | 1.0 | 1.0 | 1.0 | 0.9 | IPF1143    | 17115378..Probable zinc-finger protein         | orf19.5438 | 1143  | IPF1143    | TRANSCRIPTION                                                                                       | DNA binding                        |
| CA5790 | 0.9 | 1.0 | 1.0 | 1.0 | 1.0 | 1.0 | IPF1144    | complemer unknown function                     | orf19.5439 | 1144  | IPF1144    | CELL CYCLE AND DNA PROCESSING SUBCELLULAR LOCALISATION                                              |                                    |
| CA5791 | 1.0 | 1.0 | 0.9 | 1.0 | 1.0 | 1.1 | RPT2       | complemer 26S proteasome regulatory subun      | orf19.5440 | 4196  | CaRPT2     | No significant S.c. match                                                                           | peptidase activity                 |
| CA5792 | 1.1 | 1.0 | 1.0 | 1.0 | 1.0 | 1.0 | IPF4195    | 17119905..similar to Saccharomyces cerevisi    | orf19.5441 | 4195  | IPF4195    | CELL CYCLE AND DNA PROCESSING ""PROTEIN FATE [folding modifi                                        | peptidase activity                 |
| CA5793 | 1.0 | 1.0 | 1.0 | 1.0 | 1.0 | 1.0 | IPF4192    | 17122664..unknown function                     | orf19.5442 | 4192  | IPF4192    | UNCLASSIFIED PROTEINS                                                                               |                                    |
| CA5794 | 1.1 | 1.0 | 1.0 | 1.0 | 1.0 | 1.0 | IPF4191    | 17124254..unknown function                     | orf19.5443 | 4191  | IPF4191    | Amino acid metabolism ""Metabolism of vitamins cofactors and prostheti                              | oxidoreductase activity            |
| CA5795 | 1.0 | 1.0 | 1.0 | 0.9 | 1.0 | 1.0 | TIM44      | 17125726..mitochondrial inner membrane imp     | orf19.5444 | 4189  | CaTIM44    | PROTEIN FATE [folding modification destination] ""CELLULAR TRANSP                                   | transporter activity               |
| CA5796 | 1.0 | 1.1 | 1.0 | 1.1 | 1.0 | 1.0 | GLO3       | 17127143..zinc finger protein                  | orf19.5445 | 4185  | CaGLO3     | CELL CYCLE AND DNA PROCESSING TRANSCRIPTION SUBCELLUL                                               | enzyme regulator activity          |
| CA5797 | 1.1 | 1.1 | 1.0 | 1.1 | 1.1 | 1.1 | IPF4182    | 17128513..unknown function                     | orf19.5446 | 4182  | IPF4182    | No significant S.c. match                                                                           |                                    |
| CA5798 | 1.0 | 1.0 | 1.0 | 1.0 | 1.0 | 0.9 | IPF4181    | complemer putative permease (by homology)      | orf19.5447 | 4181  | IPF4181    | C-compound and carbohydrate metabolism ""Lipid fatty-acid and isoprenoid metabolism ""CELLULAR TRAN |                                    |
| CA5799 | 1.0 | 1.0 | 1.0 | 1.0 | 1.0 | 1.0 | IPF4176    | 17131743..unknown function                     | orf19.5449 | 4176  | IPF4176    | UNCLASSIFIED PROTEINS                                                                               |                                    |
| CA5800 | 1.1 | 1.1 | 1.0 | 1.0 | 1.0 | 1.0 | IPF4175    | 17132515..mitochondrial respiratory function ( | orf19.5450 | 4175  | IPF4175    | TRANSCRIPTION SUBCELLULAR LOCALISATION                                                              | oxidoreductase activity            |
| CA5801 | 1.1 | 1.1 | 1.1 | 1.1 | 1.1 | 1.0 | DAL1       | 17133747..allantoinase                         | orf19.5454 | 4171  | CaDAL1     | Nitrogen and sulphur metabolism Nucleotide metabolism Purine ribonuc                                | hydrolase activity                 |
| CA5802 | 1.1 | 1.3 | 1.0 | 0.9 | 0.9 | 1.0 | IPF4164    | 17135626..similar to Saccharomyces cerevisi    | orf19.5455 | 4164  | IPF4164    | CELL FATE SUBCELLULAR LOCALISATION                                                                  | molecular_function unknown         |
| CA5803 | 1.1 | 1.0 | 1.0 | 1.0 | 1.0 | 1.0 | IPF4163    | 17136031..unknown function                     | orf19.5457 | 4163  | IPF4163    | UNCLASSIFIED PROTEINS                                                                               | molecular_function unknown         |
| CA5804 | 0.8 | 0.8 | 0.9 | 1.0 | 1.0 | 1.0 | IPF4160    | 17137539..unknown function                     | orf19.5459 | 4160  | IPF4160    | SUBCELLULAR LOCALISATION                                                                            | molecular_function unknown         |
| CA5805 | 1.1 | 1.0 | 0.9 | 1.0 | 1.0 | 1.0 | IPF4153    | 17139185..similar to Saccharomyces cerevisi    | orf19.5463 | 4153  | IPF4153    | CELLULAR TRANSPORT AND TRANSPORT MECHANISMS SUBCELL                                                 | molecular_function unknown         |
| CA5806 | 1.0 | 1.0 | 6.0 | 1.0 | 0.9 | 1.0 | IPF4149    | complemer unknown function                     | orf19.5465 | 4149  | IPF4149    | SUBCELLULAR LOCALISATION                                                                            | molecular_function unknown         |
| CA5807 | 1.1 | 1.3 | 0.9 | 0.7 | 0.9 | 1.1 | RPS24      | complemer ribosomal protein S24.e              | orf19.5466 | 4146  | CaRPS24    | PROTEIN SYNTHESIS SUBCELLULAR LOCALISATION                                                          | structural molecule activity       |
| CA5810 | 1.0 | 1.0 | 1.1 | 1.0 | 1.0 | 1.1 | IPF4137.3F | complemer unknown function, 3-prime end        |            | 19666 | IPF4137.3f | No significant S.c. match                                                                           |                                    |
| CA5811 | 1.0 | 1.0 | 1.0 | 1.0 | 0.9 | 1.0 | IPF2690.5F | 17150621..unknown function, 5-prime end        | orf19.5469 | 2690  | IPF2690.5f | No significant S.c. match                                                                           |                                    |
| CA5812 | 1.0 | 1.0 | 1.0 | 1.0 | 1.2 | 1.0 | IPF2690.3F | 17153754..unknown function, 3-prime end        | orf19.5474 | 2681  | IPF2690.3f | No significant S.c. match                                                                           |                                    |
| CA5813 | 1.0 | 1.0 | 1.0 | 0.9 | 0.9 | 1.0 | IPF2522    | 17159664..unknown function                     | orf19.7460 | 2522  | IPF2522    | UNCLASSIFIED PROTEINS                                                                               | molecular_function unknown         |
| CA5814 | 1.1 | 1.0 | 1.0 | 1.0 | 1.0 | 0.9 | IPF2521    | complemer putative protease (by homology)      | orf19.7463 | 2521  | IPF2521    | PROTEIN FATE [folding modification destination]                                                     | peptidase activity                 |
| CA5815 | 1.0 | 0.9 | 1.1 | 0.9 | 1.0 | 1.0 | IPF2517    | complemer putative protease (by homology)      | orf19.7464 | 2517  | IPF2517    | PROTEIN FATE [folding modification destination]                                                     |                                    |
| CA5816 | 1.1 | 1.1 | 1.1 | 1.9 | 1.1 | 1.1 | ACC1       | complemer acetyl-coenzyme-A carboxylase (b     | orf19.7466 | 2516  | CaACC1     | Lipid fatty-acid and isoprenoid metabolism ""SUBCELLULAR LOCALISA                                   | ligase activity                    |
| CA5817 | 1.0 | 1.1 | 1.0 | 1.0 | 0.9 | 1.0 | IPF2511    | complemer unknown function                     | orf19.7468 | 2511  | IPF2511    | UNCLASSIFIED PROTEINS                                                                               | molecular_function unknown         |
| CA5818 | 1.1 | 1.1 | 1.1 | 1.0 | 1.1 | 1.1 | ARG1       | 17175287..argininosuccinate synthetase (by h   | orf19.7469 | 2508  | CaARG1     | Amino acid metabolism Nitrogen and sulphur metabolism SUBCELLUL                                     | ligase activity                    |
| CA5819 | 1.0 | 1.0 | 1.3 | 1.0 | 1.0 | 1.0 | IFF4       | complemer Unknown function                     | orf19.7472 | 2507  | CaIFF4     | CELL CYCLE AND DNA PROCESSING CELL FATE                                                             |                                    |
| CA5820 | 1.0 | 0.9 | 1.0 | 0.9 | 1.0 | 1.0 | IPF2500    | 17182862..unknown function                     | orf19.7473 | 2500  | IPF2500    | No significant S.c. match                                                                           |                                    |
| CA5821 | 1.0 | 1.0 | 1.0 | 1.0 | 1.0 | 1.1 | PHO81      | complemer Cyclin-dependent kinase inhibitor (  | orf19.7475 | 2499  | CaPHO81    | Phosphate metabolism                                                                                | enzyme regulator activity          |
| CA5822 | 0.9 | 1.0 | 0.9 | 0.9 | 1.1 | 1.1 | YRB1       | complemer GTPase-activating prot               | orf19.7477 | 2494  | CaYRB1     | TRANSCRIPTION CELLULAR TRANSPORT AND TRANSPORT MECH                                                 | protein binding                    |
| CA5823 | 0.9 | 1.0 | 1.0 | 1.0 | 1.0 | 1.1 | COQ1       | complemer Hexaprenyl pyrophosphate synthe      | orf19.7478 | 2493  | CaCOQ1     | Lipid fatty-acid and isoprenoid metabolism ""Metabolism of vitamins cof                             | transferase activity               |
| CA5824 | 1.0 | 1.1 | 1.1 | 1.1 | 1.1 | 1.1 | NTH1       | complemer Neutral trehalase neutral treh       | orf19.7479 | 2490  | CaNTH1     | C-compound and carbohydrate metabolism ENERGY SUBCELLULAR L                                         | hydrolase activity                 |
| CA5825 | 0.9 | 0.9 | 1.0 | 0.9 | 1.0 | 0.9 | IPF2489    | complemer unknown function                     | orf19.7480 | 2489  | IPF2489    | No significant S.c. match                                                                           |                                    |
| CA5826 | 1.0 | 1.0 | 0.8 | 0.7 | 0.9 | 0.9 | MDH11      | 17198457..Malate dehydrogenase (by homol       | orf19.7481 | 2486  | CaMDH11    | C-compound and carbohydrate metabolism ENERGY SUBCELLULAR LOCALISATION                              |                                    |
| CA5827 | 0.9 | 0.9 | 1.0 | 1.1 | 1.0 | 1.0 | IPF2485    | complemer unknown function                     | orf19.7482 | 2485  | IPF2485    | CELLULAR TRANSPORT AND TRANSPORT MECHANISMS CONTROL OF CELLULAR ORGANIZATION                        |                                    |
| CA5828 | 1.1 | 1.1 | 1.0 | 1.0 | 1.0 | 1.2 | CRM1       | 17201081..Nuclear export factor Crm1p [Ca      | orf19.7483 | 2484  | CaCRM1     | TRANSCRIPTION CELLULAR TRANSPORT AND TRANSPORT MECH                                                 | protein binding                    |
| CA5829 | 1.0 | 1.1 | 1.1 | 1.1 | 1.0 | 1.0 | ADE1       | 17204785..phosphoribosyl-amidoi phosphorib     | orf19.7484 | 2482  | CaADE1     | Nucleotide metabolism Purine ribonucleotide metabolism                                              | ligase activity                    |
| CA5830 | 1.0 | 0.9 | 1.0 | 1.0 | 1.0 | 1.0 | MRPL9      | complemer Mitochondrial ribosomal protein of   | orf19.7485 | 2480  | CaMRPL9    | PROTEIN SYNTHESIS SUBCELLULAR LOCALISATION                                                          | structural molecule activity       |
| CA5831 | 0.9 | 0.9 | 1.0 | 1.1 | 1.0 | 1.0 | MRPL6      | complemer ribosomal protein L6 precursor, mi   | orf19.7486 | 438   | CaMRPL6    | PROTEIN SYNTHESIS SUBCELLULAR LOCALISATION                                                          | structural molecule activity       |
| CA5833 | 1.0 | 1.0 | 1.1 | 1.0 | 1.1 | 1.0 | IMP3       | complemer U3 small nucleolar ribonucleoprote   | orf19.7488 | 436   | CaIMP3     | TRANSCRIPTION                                                                                       | RNA binding                        |
| CA5834 | 1.0 | 1.0 | 1.0 | 1.0 | 1.0 | 1.1 | LRG1       | 17214014..GTPase-activating protein of the r   | orf19.7489 | 434   | CaLRG1     | CELL FATE                                                                                           | enzyme regulator activity          |
| CA5835 | 1.0 | 1.0 | 1.0 | 1.0 | 0.9 | 1.0 | IPF429     | 17218782..unknown function                     |            | 429   | IPF429     | UNCLASSIFIED PROTEINS                                                                               | molecular_function unknown         |
| CA5836 | 1.0 | 1.0 | 1.2 | 1.0 | 1.1 | 0.9 | IPF428     | complemer transport protein (by homology)      | orf19.7490 | 428   | IPF428     | UNCLASSIFIED PROTEINS                                                                               | molecular_function unknown         |
| CA5837 | 1.0 | 1.0 | 1.0 | 0.9 | 1.0 | 1.0 | IPF426     | complemer unknown function                     | orf19.7491 | 426   | IPF426     | CLASSIFICATION NOT YET CLEAR-CUT                                                                    | molecular_function unknown         |
| CA5838 | 0.9 | 1.0 | 1.1 | 1.1 | 1.1 | 1.1 | IPF424     | 17222636..unknown function                     | orf19.7492 | 424   | IPF424     | UNCLASSIFIED PROTEINS                                                                               | molecular_function unknown         |
| CA5839 | 1.0 | 1.0 | 1.0 | 1.0 | 0.9 | 0.9 | IPF423     | complemer unknown function                     | orf19.7494 | 423   | IPF423     | UNCLASSIFIED PROTEINS                                                                               | molecular_function unknown         |

|        |     |     |     |     |     |     |             |                                                                 |            |       |           |                                                                                                         |                                  |
|--------|-----|-----|-----|-----|-----|-----|-------------|-----------------------------------------------------------------|------------|-------|-----------|---------------------------------------------------------------------------------------------------------|----------------------------------|
| CA5840 | 0.9 | 0.9 | 1.1 | 1.0 | 1.0 | 1.0 | EBP6        | complemer NADPH dehydrogenase (by homo                          | orf19.7495 | 421   | CaEBP6    | ENERGY                                                                                                  |                                  |
| CA5841 | 0.9 | 1.1 | 1.1 | 1.1 | 1.1 | 1.0 | IPF420      | complemer unknown function                                      | orf19.7497 | 420   | IPF420    | UNCLASSIFIED PROTEINS                                                                                   | protein binding                  |
| CA5842 | 1.0 | 1.1 | 1.0 | 1.0 | 1.0 | 1.0 | LEU1        | 17234862..3-isopropylmalate dehydratase (by orf19.7498          |            | 417   | CaLEU1    | Amino acid metabolism SUBCELLULAR LOCALISATION                                                          | lyase activity                   |
| CA5843 | 1.1 | 1.1 | 1.0 | 1.0 | 1.0 | 1.0 | IPF416      | complemer unknown function                                      | orf19.7499 | 416   | IPF416    | UNCLASSIFIED PROTEINS                                                                                   | nucleotidyltransferase activity  |
| CA5844 | 1.0 | 1.0 | 1.0 | 0.9 | 1.0 | 1.0 | PXA1        | 17240440..long chain fatty acid ABC transpor                    | orf19.7500 | 414   | CaPXA1    | Lipid fatty-acid and isoprenoid metabolism ""CELLULAR TRANSPORT A transporter activity,hydrolase activi |                                  |
| CA5845 | 1.0 | 0.8 | 0.8 | 0.9 | 1.0 | 0.9 | NAP1        | 17243186..nucleosome assembly protein (by orf19.7501            |            | 412   | CaNAP1    | CELL CYCLE AND DNA PROCESSING ""PROTEIN FATE [folding modifi                                            | protein binding                  |
| CA5846 | 1.1 | 0.9 | 1.1 | 1.0 | 1.2 | 1.1 | IPF409      | 17249939..unknown function                                      | orf19.7502 | 409   | IPF409    | C-compound and carbohydrate metabolism CELLULAR TRANSPORT AND TRANSPORT MECHANISMS F                    |                                  |
| CA5847 | 0.9 | 1.0 | 1.0 | 1.0 | 1.0 | 1.0 | CDA2        | complemer chitin deacetylase (by homology)                      | orf19.7503 | 408   | CaCDA2    | C-compound and carbohydrate metabolism CELL FATE                                                        | hydrolase activity               |
| CA5848 | 1.0 | 0.9 | 0.9 | 0.9 | 0.9 | 1.0 | IPF407      | complemer unknown function                                      | orf19.7504 | 407   | IPF407    | UNCLASSIFIED PROTEINS                                                                                   | molecular_function unknown       |
| CA5849 | 0.9 | 0.9 | 1.1 | 1.1 | 1.0 | 1.0 | IPF404.5F   | 17257630..unknown function, 5-prime end                         | orf19.7506 | 404   | IPF404.5f | SUBCELLULAR LOCALISATION                                                                                |                                  |
| CA5850 | 1.0 | 1.0 | 1.0 | 1.1 | 0.9 | 1.0 | IPF404.3F   | 17258777..unknown function, 3-prime end                         | orf19.7507 | 403   | IPF404.3f | No significant S.c. match                                                                               |                                  |
| CA5851 | 1.0 | 1.0 | 1.0 | 1.1 | 1.0 | 1.1 | KIN2        | complemer ser/thr protein kinase (by homolog                    | orf19.7510 | 402   | CaKIN2    | SUBCELLULAR LOCALISATION                                                                                | protein kinase activity          |
| CA5852 | 1.0 | 1.0 | 0.9 | 1.0 | 0.9 | 1.0 | ATP17.3     | complemer F1F0-ATPase complex, F1 delta subunit f, 3- $\gamma$  |            | 396   | CaATP17.3 | ENERGY ""PROTEIN FATE [folding modification destination] ""SUBCELL transporter activity                 |                                  |
| CA5853 | 1.0 | 0.9 | 1.0 | 0.9 | 1.0 | 0.9 | LSM6        | complemer U6 snRNA-associated Sm-like protein (by hon           |            | 395   | CaLSM6    | TRANSCRIPTION                                                                                           | RNA binding                      |
| CA5854 | 1.1 | 1.0 | 1.0 | 1.1 | 1.0 | 1.1 | IPF393      | complemer similar to Saccharomy.unnamed porf19.7511             |            | 393   | IPF393    | CELLULAR TRANSPORT AND TRANSPORT MECHANISMS SUBCELL structural molecule activity                        |                                  |
| CA5855 | 1.0 | 1.0 | 0.9 | 1.0 | 1.0 | 0.9 | ALK3        | complemer n-alkane inducible cytochrome P- $\alpha$ -orf19.7512 |            | 389   | CaALK3    | CELL RESCUE DEFENSE AND VIRULENCE ""CELL FATE CONTROL OF CELLULAR ORGANIZATION                          |                                  |
| CA5856 | 1.0 | 1.1 | 1.0 | 1.0 | 0.9 | 1.0 | ALK2        | complemer n-alkane inducible cytochrome P-4orf19.7513           |            | 387   | CaALK2    | CELL RESCUE DEFENSE AND VIRULENCE ""CELL FATE CONTROL OF CELLULAR ORGANIZATION                          |                                  |
| CA5857 | 1.1 | 0.5 | 0.4 | 0.2 | 0.5 | 0.5 | PCK1        | complemer phosphoenolpyruvate (PEP carbo:orf19.7514             |            | 385   | CaPCK1    | C-compound and carbohydrate metabolism ENERGY SUBCELLULAR L lyase activity                              |                                  |
| CA5858 | 1.1 | 1.0 | 1.0 | 1.0 | 1.0 | 1.0 | IPF380      | complemer unknown function                                      | orf19.7516 | 380   | IPF380    | No significant S.c. match                                                                               |                                  |
| CA5859 | 1.1 | 1.1 | 1.1 | 1.0 | 1.0 | 1.0 | CHT1        | 17281907..endochitinase 1 precur chitinase [C                   | orf19.7517 | 377   | CaCHT1    | C-compound and carbohydrate metabolism CELL CYCLE AND DNA PROCESSING SUBCELLULAR LOCA                   |                                  |
| CA5860 | 1.0 | 1.0 | 1.0 | 1.0 | 1.0 | 1.0 | IPF376      | complemer transcriptional regulator (by homol                   | orf19.7518 | 376   | IPF376    | TRANSCRIPTION ""CELL RESCUE DEFENSE AND VIRULENCE ""SUBCELLULAR LOCALISATION                            |                                  |
| CA5861 | 1.0 | 1.1 | 1.0 | 1.0 | 1.1 | 1.0 | IPF373      | 17285363..unknown function                                      | orf19.7519 | 373   | IPF373    | No significant S.c. match                                                                               |                                  |
| CA5862 | 1.1 | 1.3 | 1.0 | 0.9 | 1.0 | 1.0 | POT11       | 17286419..peroxysomal 3-ketoacyl-CoA thiol                      | orf19.7520 | 372   | CaPOT11   | Lipid fatty-acid and isoprenoid metabolism ""ENERGY SUBCELLULAR L transferase activity                  |                                  |
| CA5863 | 1.1 | 1.0 | 1.1 | 1.0 | 1.0 | 0.9 | IPF370      | complemer unknown function                                      | orf19.7521 | 370   | IPF370    | No significant S.c. match                                                                               |                                  |
| CA5864 | 1.1 | 1.0 | 1.0 | 0.9 | 1.0 | 1.0 | IPF364      | 17292399..transaminase type I (by homology)                     | orf19.7522 | 364   | IPF364    | Nitrogen and sulphur metabolism                                                                         |                                  |
| CA5865 | 1.1 | 1.1 | 0.9 | 1.0 | 1.0 | 1.1 | MKC1        | 17294244..ser/thr protein kinase cMAP kinas                     | orf19.7523 | 363   | CaMKC1    | CELL CYCLE AND DNA PROCESSING ""CELL RESCUE DEFENSE A protein kinase activity,signal transc             |                                  |
| CA5866 | 1.0 | 1.0 | 1.0 | 1.0 | 1.0 | 1.1 | IPF361      | complemer unknown function                                      | orf19.7527 | 361   | IPF361    | No significant S.c. match                                                                               |                                  |
| CA5867 | 0.8 | 1.0 | 0.9 | 1.0 | 1.1 | 0.9 | EPL1        | 17299106..DNA-binding protein (bunnamed porf19.7529             |            | 355   | CaEPL1    | UNCLASSIFIED PROTEINS                                                                                   | transferase activity             |
| CA5868 | 0.8 | 1.0 | 0.9 | 0.9 | 1.0 | 1.0 | IPF351      | 17301483..unknown function                                      | orf19.7531 | 351   | IPF351    | UNCLASSIFIED PROTEINS                                                                                   | molecular_function unknown       |
| CA5869 | 0.9 | 1.0 | 0.9 | 0.9 | 1.1 | 1.1 | MIS12       | complemer mitochondrial C1-tetrahydrofolate                     | orf19.7534 | 349   | CaMIS12   | Amino acid metabolism Nucleotide metabolism C-compound and carbohydrate metabolism ""Metabolism o       |                                  |
| CA5870 | 1.0 | 0.9 | 1.0 | 1.0 | 1.0 | 1.1 | IPF345      | complemer FH1/FH2 involved in cytokinesis a                     | orf19.7537 | 345   | IPF345    | CELL CYCLE AND DNA PROCESSING CELL FATE SUBCELLULAR LOCALISATION                                        |                                  |
| CA5871 | 1.0 | 1.0 | 1.1 | 1.0 | 1.1 | 0.9 | PIF2        | 17309819..DNA helicase (by homology)                            | orf19.7538 | 336   | CaPIF2    | CELL CYCLE AND DNA PROCESSING                                                                           | DNA binding,helicase activity    |
| CA5872 | 0.9 | 1.1 | 1.0 | 1.0 | 1.0 | 1.0 | IPF333      | complemer unknown function                                      | orf19.7539 | 333   | IPF333    | No significant S.c. match                                                                               |                                  |
| CA5873 | 1.0 | 1.0 | 1.1 | 1.0 | 1.0 | 0.9 | IPF331      | 17314831..GPI-anchored cell surface protein                     | orf19.7542 | 331   | IPF331    | No significant S.c. match                                                                               |                                  |
| CA5874 | 1.0 | 1.0 | 1.0 | 0.9 | 1.0 | 0.9 | CTA23       | complemer transcriptional activation                            | orf19.7544 | 328   | CaCTA23   | No significant S.c. match                                                                               |                                  |
| CA5875 | 1.0 | 1.0 | 1.0 | 1.0 | 1.0 | 1.0 | IPF324.3    | 17319171..unknown function, , 3-prime end                       | orf19.7545 | 324   | IPF324.3  | No significant S.c. match                                                                               |                                  |
| CA5876 | 1.0 | 1.0 | 1.1 | 1.0 | 1.1 | 1.0 | IPF12082.5F | 17327332..bumetanide-sensitive Na-K-Cl cotr                     | orf19.6833 | 12082 | IPF12082. | REGULATION OF/INTERACTION WITH CELLULAR ENVIRONMENT Titransporter activity                              |                                  |
| CA5877 | 1.1 | 1.0 | 1.0 | 1.0 | 1.0 | 1.0 | IPF12082.3F | 17329088..bumetanide-sensitive Na-K-Cl cotr                     | orf19.6832 | 12080 | IPF12082. | REGULATION OF/INTERACTION WITH CELLULAR ENVIRONMENT TRANSPORT FACILITATION                              |                                  |
| CA5878 | 1.1 | 1.0 | 1.1 | 1.0 | 1.0 | 1.0 | PRP5        | 17331400..pre-mRNA processing RNA-helica                        | orf19.6831 | 12079 | CaPRP5    | TRANSCRIPTION ""PROTEIN FATE [folding modification destination] ""RNA binding,helicase activity         |                                  |
| CA5879 | 1.0 | 1.0 | 1.1 | 1.0 | 1.0 | 1.0 | IPF12076    | 17334373..enoyl CoA hydratase (by homology)                     | orf19.6830 | 12076 | IPF12076  | CLASSIFICATION NOT YET CLEAR-CUT                                                                        |                                  |
| CA5880 | 1.0 | 0.9 | 1.0 | 1.1 | 1.0 | 0.9 | IPF12074    | 17335442..unknown function                                      | orf19.6829 | 12074 | IPF12074  | Phosphate metabolism ENERGY PROTEIN SYNTHESIS SUBCELLULA molecular_function unknown                     |                                  |
| CA5881 | 1.0 | 1.0 | 1.0 | 0.9 | 1.0 | 1.1 | SSS1        | 17337707..ER protein-translocase complex subunit (by h          |            | 2429  | CaSSS1    | PROTEIN FATE [folding modification destination] ""CELLULAR TRANSP transporter activity                  |                                  |
| CA5882 | 0.9 | 1.0 | 1.0 | 1.0 | 0.9 | 1.1 | RRP1        | 17338576..Involved in processing rRNA precu                     | orf19.6828 | 20032 | CaRRP1    | TRANSCRIPTION                                                                                           | molecular_function unknown       |
| CA5883 | 0.9 | 1.0 | 0.9 | 1.0 | 0.9 | 1.0 | IPF2425     | 17339844..unknown function                                      | orf19.6827 | 2425  | IPF2425   | TRANSCRIPTION SUBCELLULAR LOCALISATION                                                                  | protein binding                  |
| CA5884 | 0.9 | 0.8 | 1.0 | 1.0 | 1.0 | 0.9 | SLF1        | complemer Copper homeostasis protein (by h                      | orf19.6826 | 2424  | CaSLF1    | PROTEIN SYNTHESIS REGULATION OF/INTERACTION WITH CELLU RNA binding                                      |                                  |
| CA5885 | 0.9 | 1.0 | 1.0 | 0.9 | 1.0 | 1.0 | IPF2419     | 17345064..unknown function                                      | orf19.6824 | 2419  | IPF2419   | No significant S.c. match                                                                               |                                  |
| CA5886 | 1.0 | 1.0 | 1.0 | 1.0 | 1.0 | 0.9 | IPF2417     | complemer unknown function                                      | orf19.6822 | 2417  | IPF2417   | UNCLASSIFIED PROTEINS                                                                                   | molecular_function unknown       |
| CA5887 | 1.1 | 1.0 | 0.9 | 0.9 | 0.9 | 1.1 | IPF2415     | 17348282..similar to Saccharomyces cerevisi                     | orf19.6821 | 2415  | IPF2415   | CELL CYCLE AND DNA PROCESSING ""PROTEIN FATE [folding modifi                                            | protein binding                  |
| CA5888 | 1.0 | 1.0 | 1.0 | 1.0 | 1.0 | 1.1 | IPF2414     | complemer unknown function                                      | orf19.6820 | 2414  | IPF2414   | TRANSCRIPTION                                                                                           |                                  |
| CA5889 | 1.0 | 1.0 | 1.0 | 1.0 | 1.0 | 1.0 | IPF2409     | complemer RNA-dependent ATPase (by hom                          | orf19.6818 | 2409  | IPF2409   | CLASSIFICATION NOT YET CLEAR-CUT                                                                        | helicase activity                |
| CA5890 | 1.1 | 1.1 | 1.0 | 1.0 | 1.2 | 1.1 | FCR1        | 17364525..Zinc cluster transcriptic zinc cluster orf19.6817     |            | 2404  | CaFCR1    | TRANSCRIPTION                                                                                           |                                  |
| CA5891 | 1.0 | 1.1 | 1.0 | 1.1 | 1.0 | 1.1 | IPF2400     | complemer putative aldehyde reductase (by h                     | orf19.6816 | 2400  | IPF2400   | C-compound and carbohydrate metabolism                                                                  | oxidoreductase activity          |
| CA5892 | 0.5 | 1.0 | 3.1 | 2.1 | 1.6 | 1.4 | GAP1        | 17370939..Glyceraldehyde-3-phos:glyceralde                      | orf19.6814 | 2397  | CaGAP1    | C-compound and carbohydrate metabolism ENERGY SUBCELLULAR L oxidoreductase activity                     |                                  |
| CA5893 | 1.0 | 0.9 | 1.0 | 1.0 | 0.9 | 0.9 | IPF2392     | 17372227..unknown function                                      | orf19.6813 | 2392  | IPF2392   | No significant S.c. match                                                                               |                                  |
| CA5894 | 1.0 | 1.0 | 1.0 | 1.0 | 1.0 | 0.9 | PMT2        | 17373364..O-D-mannosyltransferase (by hom                       | orf19.6812 | 2391  | CaPMT2    | C-compound and carbohydrate metabolism ""PROTEIN FATE [folding m transferase activity                   |                                  |
| CA5895 | 1.1 | 1.2 | 0.9 | 0.9 | 0.9 | 1.0 | ISA2        | 17376082..Mitochondrial protein required for i                  | orf19.6811 | 2389  | CaISA2    | REGULATION OF/INTERACTION WITH CELLULAR ENVIRONMENT                                                     | molecular_function unknown       |
| CA5896 | 1.1 | 1.0 | 1.0 | 0.9 | 0.9 | 1.0 | TPD3        | complemer Ser/thr protein phosphatase (by h                     | orf19.6810 | 2388  | CaTPD3    | CELL CYCLE AND DNA PROCESSING TRANSCRIPTION CELL FATE                                                   | protein phosphatase activity     |
| CA5897 | 1.1 | 1.0 | 0.9 | 1.1 | 1.1 | 1.1 | IPF2384     | 17380149..unknown function                                      | orf19.6809 | 2384  | IPF2384   | ENERGY                                                                                                  | molecular_function unknown       |
| CA5898 | 1.0 | 1.1 | 1.0 | 1.0 | 0.9 | 1.0 | IPF2383     | complemer unknown function                                      | orf19.6808 | 2383  | IPF2383   | No significant S.c. match                                                                               |                                  |
| CA5899 | 1.0 | 1.0 | 1.0 | 1.1 | 1.1 | 1.0 | IPF2382     | 17381350..unknown function                                      | orf19.6807 | 2382  | IPF2382   | PROTEIN FATE [folding modification destination] ""CELLULAR TRANSPORT AND TRANSPORT MECHAN               |                                  |
| CA5900 | 1.1 | 1.1 | 1.0 | 1.0 | 1.0 | 1.1 | IPF2379     | complemer unknown function                                      | orf19.6806 | 2379  | IPF2379   | No significant S.c. match                                                                               |                                  |
| CA5901 | 1.0 | 1.0 | 1.1 | 1.1 | 1.0 | 0.9 | IPF2374     | 17388033..unknown function                                      | orf19.6805 | 2374  | IPF2374   | UNCLASSIFIED PROTEINS                                                                                   | molecular_function unknown       |
| CA5902 | 1.0 | 1.0 | 1.0 | 1.1 | 1.0 | 1.0 | SRP68       | 17391904..SIGNAL RECOGNITION PARTICI                            | orf19.6804 | 5941  | CaSRP68   | PROTEIN FATE [folding modification destination] ""SUBCELLULAR LOCALISATION                              |                                  |
| CA5903 | 1.0 | 1.0 | 0.9 | 1.1 | 1.0 | 0.9 | IPF5942     | 17393983..transmembrane sugar transporter                       | orf19.6803 | 5942  | IPF5942   | UNCLASSIFIED PROTEINS                                                                                   | transporter activity             |
| CA5904 | 1.0 | 1.1 | 1.0 | 1.0 | 1.1 | 1.0 | IPF5944     | 17395480..Unknown function                                      | orf19.6802 | 5944  | IPF5944   | UNCLASSIFIED PROTEINS                                                                                   | molecular_function unknown       |
| CA5905 | 0.9 | 1.0 | 0.9 | 0.9 | 1.0 | 1.1 | RPD32       | 17396909..histone deacetylase B (by homolo                      | orf19.6801 | 5946  | CaRPD32   | Phosphate metabolism CELL CYCLE AND DNA PROCESSING TRANS(hydrolase activity                             |                                  |
| CA5906 | 1.1 | 1.0 | 1.0 | 1.2 | 1.0 | 1.0 | IPF5949     | 17399353..unknown function                                      | orf19.6800 | 5949  | IPF5949   | UNCLASSIFIED PROTEINS                                                                                   |                                  |
| CA5907 | 1.0 | 0.9 | 1.0 | 1.1 | 1.2 | 1.1 | SSN6        | 17404006..transcriptional repress:putative tra                  | orf19.6798 | 5957  | CaSSN6    | TRANSCRIPTION SUBCELLULAR LOCALISATION                                                                  | transcription regulator activity |
| CA5908 | 1.1 | 1.1 | 1.0 | 1.0 | 1.0 | 0.9 | IPF5960     | complemer unknown function                                      | orf19.6797 | 5960  | IPF5960   | No significant S.c. match                                                                               |                                  |
| CA5909 | 0.9 | 1.0 | 0.9 | 0.9 | 1.0 | 1.0 | YSA1        | complemer sugar-nucleotide hydrolase (by ho                     | orf19.6796 | 5962  | CaYSA1    | Nucleotide metabolism                                                                                   | hydrolase activity               |
| CA5910 | 1.0 | 1.0 | 1.0 | 0.9 | 1.0 | 1.0 | IPF5964     | 17411494..unknown function                                      | orf19.6795 | 5964  | IPF5964   | No significant S.c. match                                                                               |                                  |
| CA5911 | 1.0 | 1.1 | 1.0 | 1.0 | 1.0 | 1.0 | IPF5965     | 17412612..NADH-ubiquinone oxidoreductase                        | orf19.6794 | 5965  | IPF5965   | No significant S.c. match                                                                               |                                  |

|        |     |     |     |     |     |     |            |                                                 |              |            |           |                                                                                                    |                                                  |  |
|--------|-----|-----|-----|-----|-----|-----|------------|-------------------------------------------------|--------------|------------|-----------|----------------------------------------------------------------------------------------------------|--------------------------------------------------|--|
| CA5912 | 1.0 | 1.0 | 1.0 | 0.9 | 1.0 | 1.0 | IPF5966    | complemer unknown function                      | orf19.6793   | 5966       | IPF5966   | No significant S.c. match                                                                          |                                                  |  |
| CA5913 | 1.1 | 1.1 | 0.9 | 1.0 | 1.0 | 0.9 | RRD1       | 17416297..Phosphotyrosyl phosphatase activ      | orf19.6792   | 10731      | CaRRD1    | CELL CYCLE AND DNA PROCESSING                                                                      | protein phosphatase activity                     |  |
| CA5914 | 1.6 | 2.0 | 1.3 | 1.6 | 1.2 | 1.1 | HHT3       | 17418335..histone H3                            | orf19.6791   | 10733      | CaHHT3    | TRANSCRIPTION SUBCELLULAR LOCALISATION                                                             |                                                  |  |
| CA5915 | 1.0 | 1.0 | 1.0 | 1.0 | 1.0 | 1.0 | IPF10735   | complemer similar to Saccharomyces cerevisi     | orf19.6790   | 10735      | IPF10735  | TRANSCRIPTION CELL FATE                                                                            | RNA binding                                      |  |
| CA5916 | 1.0 | 1.0 | 1.0 | 1.0 | 1.1 | 1.0 | IPF19818   | 17424240..similar to Saccharomyces cerevisi     | orf19.6789   | 19818      | IPF19818  | CELL CYCLE AND DNA PROCESSING SUBCELLULAR LOCALISATIO                                              | structural molecule activity                     |  |
| CA5917 | 1.0 | 1.0 | 1.0 | 0.9 | 0.9 | 1.0 | IPF8923    | 17428344..unknown function                      | orf19.6788   | 8923       | IPF8923   | CELLULAR TRANSPORT AND TRANSPORT MECHANISMS SUBCELLULAR LOCALISATION                               |                                                  |  |
| CA5918 | 1.0 | 1.0 | 1.0 | 1.0 | 1.0 | 1.0 | ERV14      | 17429739..membrane protein                      | orf19.6787   | 8924       | CaERV14   | CELLULAR TRANSPORT AND TRANSPORT MECHANISMS CELL FA1                                               | molecular_function unknown                       |  |
| CA5919 | 1.0 | 1.0 | 1.0 | 1.0 | 0.9 | 1.0 | IPF8926.3  | complemer unknown function, 3-prime end         | orf19.6786   | 8926       | IPF8926.3 | No significant S.c. match                                                                          |                                                  |  |
| CA5920 | 1.1 | 1.0 | 1.0 | 0.9 | 1.0 | 1.0 | RPS12      | complemer acidic ribosomal protein S12 (by h    | orf19.6785   | 8927       | CaRPS12   | PROTEIN SYNTHESIS SUBCELLULAR LOCALISATION                                                         | structural molecule activity                     |  |
| CA5921 | 0.9 | 0.9 | 1.0 | 1.0 | 0.9 | 1.0 | IPF8930    | 17433971..unknown function                      | orf19.6784   | 8930       | IPF8930   | No significant S.c. match                                                                          |                                                  |  |
| CA5922 | 1.0 | 0.9 | 0.9 | 0.9 | 1.0 | 0.9 | MRS6       | complemer geranylgeranyltransfer:Rab geran      | orf19.6783   | 8931       | CaMRS6    | Lipid fatty-acid and isoprenoid metabolism *****                                                   | PROTEIN FATE [folding menzyme regulator activity |  |
| CA5923 | 1.0 | 1.0 | 0.9 | 1.0 | 1.0 | 1.1 | IFQ2       | complemer Unknown function                      | orf19.6782   | 2825       | CaIFQ2    | No significant S.c. match                                                                          |                                                  |  |
| CA5924 | 1.3 | 1.6 | 1.6 | 2.0 | 1.1 | 1.1 | IPF2822    | complemer unknown function                      | orf19.6781   | 2822       | IPF2822   | No significant S.c. match                                                                          |                                                  |  |
| CA5925 | 1.1 | 1.1 | 1.1 | 1.1 | 1.1 | 1.0 | MET8       | 17448528..Siroheme synthase (by homology)       | orf19.6780   | 2818       | CaMET8    | Amino acid metabolism Nitrogen and sulphur metabolism                                              | lyase activity                                   |  |
| CA5926 | 1.0 | 1.0 | 1.0 | 1.1 | 1.1 | 1.0 | PRO2       | complemer Proline biosynthetic enzyme (by h     | orf19.6779   | 2817       | CaPRO2    | Amino acid metabolism                                                                              | oxidoreductase activity                          |  |
| CA5927 | 1.1 | 1.1 | 1.0 | 1.1 | 1.1 | 1.1 | DRS22      | 17451300..Membrane-spanning Ca-ATPase (         | orf19.6778   | 2816       | CaDRS22   | CELLULAR TRANSPORT AND TRANSPORT MECHANISMS SUBCELL                                                | hydrolase activity                               |  |
| CA5928 | 0.9 | 1.1 | 1.0 | 1.0 | 0.9 | 1.0 | IPF2815    | 17456300..unknown function                      | orf19.6777   | 2815       | IPF2815   | No significant S.c. match                                                                          |                                                  |  |
| CA5929 | 1.0 | 1.0 | 1.0 | 0.9 | 1.0 | 1.0 | GCD2       | 17457337..Translation initiation factor eIF2B,  | orf19.6776   | 2813       | CaGCD2    | PROTEIN SYNTHESIS ""PROTEIN FATE [folding modification destinatic                                  | translation regulator activity                   |  |
| CA5930 | 1.0 | 1.1 | 1.0 | 1.0 | 1.0 | 1.0 | ECM29.EXON | complemer Involved in cell wall biogenesis an   | orf19.6773   | 2810       | CaECM29   | CONTROL OF CELLULAR ORGANIZATION UNCLASSIFIED PROTEIN                                              | molecular_function unknown                       |  |
| CA5931 | 1.0 | 1.0 | 1.0 | 1.0 | 1.0 | 1.0 | ECM29.EXON | complemer Involved in cell wall biogenesis an   | orf19.6772   | 2807       | CaECM29   | CONTROL OF CELLULAR ORGANIZATION UNCLASSIFIED PROTEINS                                             |                                                  |  |
| CA5932 | 1.1 | 1.0 | 1.0 | 1.0 | 1.1 | 1.1 | UBI4       | complemer Polyubiquitin                         | polyubiquiti | orf19.6771 | 2805      | CaUBI4                                                                                             | No significant S.c. match                        |  |
| CA5933 | 0.9 | 1.0 | 1.0 | 1.1 | 1.1 | 1.1 | IPF2804    | complemer unknown function                      | orf19.6770   | 2804       | IPF2804   | UNCLASSIFIED PROTEINS                                                                              | protein binding                                  |  |
| CA5934 | 1.0 | 1.0 | 1.0 | 1.0 | 1.0 | 1.0 | IPF2802    | 17469283..unknown function                      | orf19.6769   | 2802       | IPF2802   | UNCLASSIFIED PROTEINS                                                                              | molecular_function unknown                       |  |
| CA5935 | 0.9 | 1.0 | 1.0 | 1.0 | 1.0 | 1.0 | IPF2798    | 17471697..unknown function                      | orf19.6766   | 2798       | IPF2798   | TRANSCRIPTION                                                                                      | RNA binding                                      |  |
| CA5936 | 1.1 | 0.8 | 1.1 | 1.9 | 1.5 | 1.5 | IPF2795    | complemer unknown function                      | lysine/gluta | orf19.6763 | 2795      | IPF2795                                                                                            | CELL CYCLE AND DNA PROCESSING                    |  |
| CA5937 | 1.0 | 0.9 | 1.0 | 1.0 | 0.9 | 1.0 | IPF2784    | 17479036..unknown function                      | orf19.6760   | 2784       | IPF2784   | CELL FATE                                                                                          | molecular_function unknown                       |  |
| CA5938 | 1.0 | 1.0 | 1.0 | 1.0 | 1.0 | 1.0 | IPF3481    | 17481199..unknown function                      | orf19.6759   | 3482       | IPF3481   | CELL FATE                                                                                          |                                                  |  |
| CA5939 | 0.9 | 0.9 | 1.0 | 1.0 | 1.0 | 1.1 | IPF3484    | 17483668..aldo/keto reductase (by homology)     | orf19.6758   | 3484       | IPF3484   | C-compound and carbohydrate metabolism SUBCELLULAR LOCALISATION                                    |                                                  |  |
| CA5940 | 1.1 | 1.0 | 1.0 | 1.0 | 0.9 | 1.0 | IPF3485    | 17484974..aldo/keto reductase (by homology)     | orf19.6757   | 3485       | IPF3485   | C-compound and carbohydrate metabolism SUBCELLULAR LOCALISAT                                       | oxidoreductase activity                          |  |
| CA5941 | 1.0 | 0.9 | 0.9 | 1.0 | 0.9 | 1.0 | IPF3486    | 17486121..unknown function                      | orf19.6756   | 3486       | IPF3486   | UNCLASSIFIED PROTEINS                                                                              | enzyme regulator activity                        |  |
| CA5942 | 1.0 | 1.0 | 1.0 | 1.1 | 1.0 | 1.0 | DLD2       | 17487290..D-lactate ferricytochrome C oxido     | orf19.6755   | 3488       | CaDLD2    | C-compound and carbohydrate metabolism ENERGY SUBCELLULAR L                                        | oxidoreductase activity                          |  |
| CA5943 | 0.9 | 1.0 | 1.0 | 1.2 | 1.1 | 1.1 | IPF3490    | 17489734..unknown function                      | orf19.6754   | 3490       | IPF3490   | No significant S.c. match                                                                          |                                                  |  |
| CA5944 | 1.1 | 1.0 | 1.0 | 1.0 | 1.0 | 1.1 | IPF3491    | 17490890..unknown function                      | orf19.6753   | 3491       | IPF3491   | UNCLASSIFIED PROTEINS                                                                              | molecular_function unknown                       |  |
| CA5945 | 1.0 | 1.1 | 1.0 | 1.0 | 1.0 | 1.0 | IPF3492    | complemer unknown function                      | orf19.6752   | 3492       | IPF3492   | PROTEIN SYNTHESIS                                                                                  | structural molecule activity                     |  |
| CA5946 | 1.0 | 1.0 | 1.0 | 1.0 | 1.0 | 0.9 | IPF3493    | 17492307..unknown function                      | orf19.6751   | 3493       | IPF3493   | TRANSCRIPTION                                                                                      | transferase activity                             |  |
| CA5947 | 1.1 | 1.0 | 1.0 | 1.0 | 1.1 | 1.1 | KRS1       | complemer Lysyl-tRNA synthetase (by homol       | orf19.6749   | 3495       | CaKRS1    | PROTEIN SYNTHESIS SUBCELLULAR LOCALISATION                                                         | ligase activity                                  |  |
| CA5948 | 0.9 | 0.9 | 1.0 | 1.0 | 1.1 | 1.1 | IPF3496    | 17495321..unknown function                      | orf19.6748   | 3496       | IPF3496   | No significant S.c. match                                                                          |                                                  |  |
| CA5949 | 1.0 | 1.0 | 1.1 | 1.0 | 1.0 | 1.0 | IPF3498    | 17496843..unknown function                      | orf19.6747   | 3498       | IPF3498   | UNCLASSIFIED PROTEINS                                                                              | molecular_function unknown                       |  |
| CA5950 | 0.9 | 0.8 | 1.8 | 1.8 | 1.3 | 1.1 | TPI1       | 17498034..Triose phosphate isom triose phos     | orf19.6745   | 3499       | CaTPI1    | C-compound and carbohydrate metabolism ENERGY SUBCELLULAR L                                        | isomerase activity                               |  |
| CA5951 | 1.0 | 1.1 | 0.9 | 1.1 | 1.0 | 0.9 | IPF3500    | complemer unknown function                      | orf19.6744   | 3500       | IPF3500   | CELL CYCLE AND DNA PROCESSING                                                                      | molecular_function unknown                       |  |
| CA5952 | 1.0 | 1.0 | 1.0 | 1.0 | 1.0 | 1.0 | IPF3503    | 17500349..similar to Saccharomyces cerevisi     | orf19.6742   | 3503       | IPF3503   | TRANSCRIPTION SUBCELLULAR LOCALISATION                                                             | protein phosphatase activity                     |  |
| CA5953 | 1.0 | 1.0 | 1.0 | 1.0 | 1.0 | 1.0 | IPF3506    | 17503763..unknown function                      | orf19.6741   | 3506       | IPF3506   | UNCLASSIFIED PROTEINS                                                                              |                                                  |  |
| CA5954 | 1.0 | 1.0 | 1.0 | 1.0 | 1.0 | 1.0 | IPF3508    | 17505368..unknown function                      | orf19.6740   | 3508       | IPF3508   | TRANSCRIPTION SUBCELLULAR LOCALISATION                                                             | RNA binding                                      |  |
| CA5955 | 1.0 | 1.0 | 1.0 | 1.1 | 1.0 | 1.0 | IPF3510    | 17506855..unknown function                      | orf19.6739   | 3510       | IPF3510   | C-compound and carbohydrate metabolism                                                             | molecular_function unknown                       |  |
| CA5956 | 1.0 | 1.0 | 1.0 | 1.0 | 0.9 | 1.2 | VAN1       | 17509387..Vanadate resistance protein           | orf19.6738   | 3512       | CaVAN1    | CELL CYCLE AND DNA PROCESSING ""PROTEIN FATE [folding modifi                                       | transferase activity                             |  |
| CA5957 | 1.0 | 0.9 | 1.0 | 1.1 | 0.9 | 1.0 | RRP3.3EOC  | 17511492..RNA-dependent ATPase, helicase        | orf19.7546   | 17103      | CaRRP3.3  | TRANSCRIPTION SUBCELLULAR LOCALISATION                                                             | RNA binding,helicase activity                    |  |
| CA5958 | 1.0 | 0.9 | 0.9 | 0.9 | 0.9 | 1.0 | PIB1       | complemer phosphatidylinositol(3)-phosphate     | orf19.7547   | 17102      | CaPIB1    | Lipid fatty-acid and isoprenoid metabolism ""SUBCELLULAR LOCALISA                                  | ligase activity                                  |  |
| CA5959 | 1.1 | 1.0 | 0.9 | 1.0 | 1.0 | 0.9 | SRB7       | 17514692..DNA-directed RNA polymerase II        | lorf19.7548  | 12936      | CaSRB7    | TRANSCRIPTION SUBCELLULAR LOCALISATION                                                             | transcription regulator activity                 |  |
| CA5960 | 1.0 | 1.0 | 0.9 | 1.1 | 1.0 | 1.1 | PMT5       | complemer protein mannosyltransferase (by h     | orf19.7549   | 12934      | CaPMT5    | C-compound and carbohydrate metabolism ""PROTEIN FATE [folding modification destination] ""SUBCELL |                                                  |  |
| CA5961 | 0.9 | 1.0 | 1.0 | 0.9 | 1.0 | 1.0 | IFA14      | complemer unknown function                      | orf19.7550   | 12930      | CaIFA14   | No significant S.c. match                                                                          |                                                  |  |
| CA5962 | 1.1 | 1.0 | 1.1 | 1.0 | 1.0 | 1.0 | ALO1       | 17532037..D-arabinono-1,4-lactor D-arabinon     | orf19.7551   | 967        | CaALO1    | C-compound and carbohydrate metabolism ""CELL RESCUE DEFENSE                                       | oxidoreductase activity                          |  |
| CA5963 | 1.0 | 1.0 | 1.1 | 1.0 | 0.9 | 1.0 | IPF966     | complemer unknown function                      | orf19.7552   | 966        | IPF966    | UNCLASSIFIED PROTEINS                                                                              | RNA binding                                      |  |
| CA5964 | 1.1 | 1.0 | 1.1 | 1.1 | 1.0 | 1.1 | IPF963     | 17537148..unknown function                      | orf19.7553   | 963        | IPF963    | No significant S.c. match                                                                          |                                                  |  |
| CA5965 | 1.0 | 1.0 | 1.0 | 1.0 | 1.0 | 1.0 | IPF961     | 17538370..drug resistance protein (by homol     | orf19.7554   | 961        | IPF961    | CELL RESCUE DEFENSE AND VIRULENCE ""TRANSPORT FACILITATION                                         |                                                  |  |
| CA5966 | 1.0 | 0.9 | 0.9 | 1.0 | 1.0 | 1.0 | IPF959     | complemer unknown function                      | orf19.7556   | 959        | IPF959    | No significant S.c. match                                                                          |                                                  |  |
| CA5967 | 1.0 | 1.0 | 0.9 | 1.0 | 0.9 | 1.1 | IPF955     | 17542095..member of the AAA ATPase family       | orf19.7558   | 955        | IPF955    | PROTEIN FATE [folding modification destination] ""SUBCELLULAR LOC                                  | molecular_function unknown                       |  |
| CA5968 | 0.9 | 0.5 | 1.6 | 2.0 | 1.5 | 1.4 | IPF946     | 17547457..unknown function                      | orf19.7561   | 946        | IPF946    | No significant S.c. match                                                                          |                                                  |  |
| CA5969 | 1.1 | 1.0 | 1.0 | 1.0 | 1.0 | 1.1 | BET2       | complemer beta subunit of geranylBeta subun     | orf19.7563   | 941        | CaBET2    | Lipid fatty-acid and isoprenoid metabolism *****                                                   | PROTEIN FATE [folding m                          |  |
| CA5970 | 1.0 | 1.0 | 1.0 | 1.0 | 1.1 | 1.1 | DPB2       | complemer DNA-directed DNA polymerase ep        | orf19.7564   | 940        | CaDPB2    | CELL CYCLE AND DNA PROCESSING SUBCELLULAR LOCALISATIO                                              | nucleotidyltransferase activity                  |  |
| CA5971 | 1.0 | 1.0 | 1.0 | 1.0 | 1.0 | 1.0 | GNP2       | 17560024..high affinity glutamine permease      | (lorf19.7565 | 937        | CaGNP2    | Amino acid metabolism TRANSPORT FACILITATION                                                       |                                                  |  |
| CA5972 | 1.0 | 1.0 | 1.0 | 0.9 | 1.0 | 1.0 | GNP1       | 17564170..high affinity glutamine permease      | (lorf19.7566 | 934        | CaGNP1    | Amino acid metabolism TRANSPORT FACILITATION                                                       |                                                  |  |
| CA5973 | 0.9 | 0.9 | 1.0 | 1.0 | 1.0 | 1.0 | IPF931     | 17566719..unknown function                      | orf19.7567   | 931        | IPF931    | UNCLASSIFIED PROTEINS                                                                              | molecular_function unknown                       |  |
| CA5974 | 1.0 | 1.0 | 1.0 | 1.0 | 1.0 | 0.9 | IPF930     | 17568313..unknown function                      | orf19.7568   | 930        | IPF930    | CELL FATE                                                                                          | molecular_function unknown                       |  |
| CA5975 | 1.0 | 1.1 | 1.0 | 1.0 | 1.0 | 1.0 | SIK1       | complemer nucleolar protein involved in pre-r   | orf19.7569   | 929        | CaSIK1    | TRANSCRIPTION SUBCELLULAR LOCALISATION                                                             | molecular_function unknown                       |  |
| CA5976 | 1.0 | 1.1 | 1.0 | 1.1 | 1.0 | 1.0 | IPF928     | complemer zinc-finger transcription factor of t | orf19.7570   | 928        | IPF928    | Nitrogen and sulphur metabolism TRANSCRIPTION SUBCELLULAR LC                                       | transcription regulator activity                 |  |
| CA5977 | 1.1 | 1.0 | 1.0 | 1.1 | 1.0 | 0.9 | UBC4.3     | 17575390..E2 ubiquitin-conjugatin Ubiquitin-c   | orf19.7571   | 926        | CaUBC4.3  | PROTEIN FATE [folding modification destination] ""CELLULAR TRANSPORT AND TRANSPORT MECHAN          |                                                  |  |
| CA5978 | 1.0 | 1.0 | 1.0 | 1.2 | 0.9 | 1.1 | SPT7       | 17576602..transcription factor, member of the   | orf19.7572   | 925        | CaSPT7    | TRANSCRIPTION SUBCELLULAR LOCALISATION                                                             | structural molecule activity                     |  |
| CA5979 | 0.9 | 1.0 | 1.0 | 1.0 | 0.9 | 1.0 | IPF921     | 17581159..BTB domain and Ankaryin repeat        | orf19.7574   | 921        | IPF921    | TRANSCRIPTION CELLULAR TRANSPORT AND TRANSPORT MECHANISMS CELL FATE SUBCELLUL                      |                                                  |  |
| CA5980 | 1.0 | 1.0 | 1.0 | 1.1 | 1.1 | 1.1 | IPF918     | complemer unknown function                      | orf19.7576   | 918        | IPF918    | No significant S.c. match                                                                          |                                                  |  |
| CA5981 | 1.0 | 1.0 | 1.1 | 0.9 | 1.0 | 0.9 | MSS51      | complemer involved in maturation of COX1 an     | orf19.7577   | 917        | CaMSS51   | PROTEIN SYNTHESIS SUBCELLULAR LOCALISATION                                                         | molecular_function unknown                       |  |
| CA5982 | 1.0 | 0.9 | 1.0 | 0.9 | 0.9 | 0.9 | IPF915     | complemer unknown function                      | orf19.7578   | 915        | IPF915    | SUBCELLULAR LOCALISATION                                                                           | transporter activity                             |  |
| CA5983 | 1.0 | 1.0 | 1.0 | 1.0 | 1.0 | 1.0 | IPF913     | 17589318..unknown function                      | orf19.7579   | 913        | IPF913    | No significant S.c. match                                                                          |                                                  |  |

|        |     |     |     |     |     |     |           |                                                             |               |                                                                                                 |                                  |
|--------|-----|-----|-----|-----|-----|-----|-----------|-------------------------------------------------------------|---------------|-------------------------------------------------------------------------------------------------|----------------------------------|
| CA5984 | 0.9 | 0.7 | 0.9 | 1.0 | 1.0 | 0.9 | CUS1      | 17591992..spliceosome associated protein (b orf19.7581      | 911 CaCUS1    | TRANSCRIPTION SUBCELLULAR LOCALISATION                                                          | protein binding,RNA binding      |
| CA5985 | 1.0 | 0.9 | 0.9 | 0.9 | 1.1 | 1.1 | IPF907    | complemer unknown function orf19.7583                       | 907 IPF907    | Lipid fatty-acid and isoprenoid metabolism ""TRANSCRIPTION SUBCELLULAR LOCALISATION             |                                  |
| CA5986 | 1.1 | 1.1 | 1.0 | 1.0 | 0.9 | 1.0 | INO1      | complemer myo-inositol-1-phosphoinositol-1-p orf19.7585     | 904 CaINO1    | C-compound and carbohydrate metabolism SUBCELLULAR LOCALISATIONisomerase activity               |                                  |
| CA5987 | 1.0 | 1.0 | 1.1 | 1.0 | 1.0 | 1.0 | CHT3      | 17603077..chitinase 3 precursor chitinase L orf19.7586      | 696 CaCHT3    | C-compound and carbohydrate metabolism CELL CYCLE AND DNA PRhydrolyase activity                 |                                  |
| CA5988 | 1.0 | 1.1 | 1.0 | 1.0 | 1.0 | 1.0 | IPF693    | complemer unknown function orf19.7588                       | 693 IPF693    | UNCLASSIFIED PROTEINS                                                                           | molecular_function unknown       |
| CA5989 | 1.0 | 1.0 | 0.9 | 1.0 | 1.0 | 1.0 | IPF692    | 17605943..unknown function orf19.7589                       | 692 IPF692    | No significant S.c. match                                                                       |                                  |
| CA5990 | 1.1 | 1.1 | 1.0 | 1.0 | 1.1 | 1.0 | IPF690.5F | 17607238..NADH dehydrogenase (ubiquinon)orf19.7590          | 690 IPF690.5f | No significant S.c. match                                                                       |                                  |
| CA5991 | 0.9 | 1.0 | 1.0 | 1.1 | 1.0 | 1.1 | IPF690.3F | 17607789..NADH dehydrogenase (ubiquinon)orf19.7591          | 689 IPF690.3f | No significant S.c. match                                                                       |                                  |
| CA5992 | 1.1 | 1.4 | 1.0 | 1.1 | 1.1 | 1.2 | FAA4      | 17613862..long-chain fatty acid--CoA ligase a orf19.7592    | 20033 CaFAA4  | Lipid fatty-acid and isoprenoid metabolism """"PROTEIN FATE [folding mligase activity           |                                  |
| CA5993 | 1.0 | 1.0 | 1.1 | 1.0 | 1.0 | 1.1 | ASP1      | complemer L-asparaginase (by homology) orf19.7593           | 679 CaASP1    | Amino acid metabolism SUBCELLULAR LOCALISATION                                                  | hydrolase activity               |
| CA5994 | 0.9 | 1.0 | 1.0 | 1.0 | 1.1 | 1.1 | IPF677    | 17618102..unknown function orf19.7594                       | 677 IPF677    | No significant S.c. match                                                                       |                                  |
| CA5995 | 1.0 | 1.0 | 1.0 | 1.0 | 1.0 | 0.9 | IPF676    | complemer unknown function orf19.7595                       | 676 IPF676    | No significant S.c. match                                                                       |                                  |
| CA5996 | 0.9 | 1.0 | 1.1 | 1.0 | 1.0 | 1.1 | IPF673    | 17620784..unknown function orf19.7596                       | 673 IPF673    | ENERGY                                                                                          |                                  |
| CA5998 | 1.0 | 0.9 | 0.9 | 1.0 | 1.0 | 1.0 | IPF670    | 17622301..unknown function orf19.7598                       | 670 IPF670    | PROTEIN FATE [folding modification destination]                                                 | molecular_function unknown       |
| CA5999 | 1.0 | 0.9 | 1.0 | 1.0 | 1.1 | 1.0 | IPF668    | 17625718..unknown function orf19.7599                       | 668 IPF668    | UNCLASSIFIED PROTEINS                                                                           | RNA binding                      |
| CA6000 | 1.0 | 1.0 | 0.9 | 0.8 | 0.9 | 0.9 | FDH11.3   | complemer glutathione-dependent formaldehy orf19.7600       | 666 CaFDH11.3 | C-compound and carbohydrate metabolism ""CELL RESCUE DEFENSE oxidoreductase activity            |                                  |
| CA6001 | 1.0 | 1.1 | 1.0 | 0.9 | 1.1 | 1.0 | IPF662    | 17629811..unknown function orf19.7601                       | 662 IPF662    | UNCLASSIFIED PROTEINS                                                                           | transferase activity             |
| CA6002 | 1.0 | 1.0 | 0.9 | 0.8 | 0.8 | 0.9 | IPF661    | complemer unknown function orf19.7602                       | 661 IPF661    | UNCLASSIFIED PROTEINS                                                                           | enzyme regulator activity        |
| CA6003 | 1.0 | 1.1 | 1.0 | 0.9 | 1.0 | 1.0 | IPF660    | 17632391..unknown function orf19.7603                       | 660 IPF660    | UNCLASSIFIED PROTEINS                                                                           | molecular_function unknown       |
| CA6005 | 1.1 | 1.0 | 1.0 | 1.0 | 1.0 | 0.9 | PUP1      | complemer 20S proteasom ebeta2 subunit (by orf19.7605       | 654 CaPUP1    | PROTEIN FATE [folding modification destination] ""SUBCELLULAR LOCpeptidase activity             |                                  |
| CA6006 | 0.9 | 0.9 | 1.0 | 1.0 | 1.0 | 0.9 | IPF652    | 17638868..unknown function orf19.7606                       | 652 IPF652    | No significant S.c. match                                                                       |                                  |
| CA6007 | 1.0 | 1.0 | 1.1 | 1.0 | 1.0 | 1.0 | IPF650    | 17640920..unknown function orf19.7608                       | 650 IPF650    | No significant S.c. match                                                                       |                                  |
| CA6008 | 1.0 | 0.9 | 1.0 | 1.1 | 1.0 | 1.1 | IPF647    | 17642972..unknown function orf19.7609                       | 647 IPF647    | No significant S.c. match                                                                       |                                  |
| CA6009 | 0.9 | 1.0 | 1.2 | 1.6 | 1.1 | 1.2 | IPF643    | 17648191..similar to Saccharomyces cerevisi orf19.7610      | 643 IPF643    | CELL CYCLE AND DNA PROCESSING CELL FATE                                                         | protein phosphatase activity     |
| CA6010 | 1.0 | 1.1 | 0.9 | 1.0 | 1.0 | 1.0 | TRX1      | complemer thioredoxin (by homology) orf19.7611              | 640 CaTRX1    | CELL CYCLE AND DNA PROCESSING ""PROTEIN FATE [folding modil oxidoreductase activity             |                                  |
| CA6011 | 0.9 | 1.0 | 0.9 | 1.0 | 0.9 | 0.9 | CTM1      | complemer cytochrome c methyltransferase (b orf19.7612      | 639 CaCTM1    | PROTEIN FATE [folding modification destination]                                                 | transferase activity             |
| CA6012 | 1.1 | 1.0 | 1.0 | 1.0 | 1.1 | 1.1 | HCR1      | 17655504..putative translation initiation factor orf19.7613 | 638 CaHCR1    | TRANSCRIPTION                                                                                   | translation regulator activity   |
| CA6013 | 1.0 | 1.0 | 1.1 | 0.9 | 0.9 | 1.0 | IPF635    | complemer unknown function orf19.7614                       | 635 IPF635    | No significant S.c. match                                                                       |                                  |
| CA6014 | 0.9 | 1.1 | 0.9 | 1.0 | 1.1 | 0.9 | TRS31     | 17657803..targeting complex (TR/unnamed porf19.7615         | 634 CaTRS31   | CELLULAR TRANSPORT AND TRANSPORT MECHANISMS SUBCELLmolecular_function unknown                   |                                  |
| CA6015 | 0.9 | 0.9 | 1.1 | 1.1 | 1.0 | 1.2 | ARD1      | 17658711..protein N-acetyltransferase subuni orf19.7617     | 631 CaARD1    | Lipid fatty-acid and isoprenoid metabolism ""CELL CYCLE AND DNA PR transferase activity         |                                  |
| CA6016 | 1.0 | 0.9 | 1.0 | 0.9 | 1.0 | 1.0 | IPF630    | complemer unknown function orf19.7618                       | 630 IPF630    | UNCLASSIFIED PROTEINS                                                                           | chaperone activity               |
| CA6017 | 1.0 | 1.0 | 1.0 | 1.0 | 0.9 | 1.1 | IPF629    | 17661145..unknown function orf19.7619                       | 629 IPF629    | UNCLASSIFIED PROTEINS                                                                           |                                  |
| CA6018 | 1.0 | 1.0 | 1.0 | 1.0 | 0.9 | 0.9 | IPF627    | complemer unknown function orf19.7620                       | 627 IPF627    | TRANSCRIPTION                                                                                   | molecular_function unknown       |
| CA6019 | 1.0 | 1.0 | 0.9 | 1.0 | 0.9 | 0.9 | IPF625    | 17664248..unknown function orf19.7621                       | 625 IPF625    | UNCLASSIFIED PROTEINS                                                                           | molecular_function unknown       |
| CA6020 | 1.0 | 0.9 | 1.0 | 1.0 | 1.0 | 1.0 | SPT3      | complemer transcription factor transcriptio orf19.7622      | 624 CaSPT3    | TRANSCRIPTION CELL FATE SUBCELLULAR LOCALISATION                                                | transcription regulator activity |
| CA6021 | 0.9 | 1.1 | 1.0 | 1.0 | 1.1 | 0.9 | BFR2      | complemer involved in protein transport steps orf19.7624    | 621 CaBFR2    | CELLULAR TRANSPORT AND TRANSPORT MECHANISMS CELL FA1molecular_function unknown                  |                                  |
| CA6022 | 1.1 | 1.0 | 0.9 | 1.0 | 1.0 | 1.1 | IPF618    | 17670702..GPI-anchored cell surface protein orf19.7625      | 618 IPF618    | No significant S.c. match                                                                       |                                  |
| CA6023 | 1.0 | 1.0 | 1.0 | 1.0 | 1.1 | 1.0 | CDC33     | 17671599..translation initiation fac cap-binding orf19.7626 | 616 CaCDC33   | PROTEIN SYNTHESIS CELL FATE SUBCELLULAR LOCALISATION                                            | translation regulator activity   |
| CA6024 | 1.2 | 1.1 | 1.0 | 1.0 | 1.1 | 0.9 | IPF615    | complemer unknown function orf19.7627                       | 615 IPF615    | CELL FATE                                                                                       | molecular_function unknown       |
| CA6025 | 1.0 | 1.0 | 1.0 | 1.0 | 0.9 | 1.0 | IPF614    | 17673364..unknown function orf19.7629                       | 614 IPF614    | UNCLASSIFIED PROTEINS                                                                           | molecular_function unknown       |
| CA6026 | 1.0 | 1.1 | 1.1 | 1.0 | 1.0 | 1.1 | IPF610    | complemer subunit of the anaphase promoting orf19.7631      | 610 IPF610    | UNCLASSIFIED PROTEINS                                                                           | DNA binding                      |
| CA6027 | 1.0 | 1.1 | 1.0 | 1.0 | 0.9 | 1.0 | IPF609    | 17677515..unknown function orf19.7632                       | 609 IPF609    | TRANSCRIPTION SUBCELLULAR LOCALISATION                                                          |                                  |
| CA6028 | 1.0 | 1.0 | 1.0 | 1.0 | 1.0 | 1.0 | IPF607    | complemer unknown function orf19.7634                       | 607 IPF607    | CELL CYCLE AND DNA PROCESSING SUBCELLULAR LOCALISATIO                                           | molecular_function unknown       |
| CA6029 | 1.1 | 1.1 | 1.0 | 0.9 | 1.1 | 1.1 | DRS1      | 17682130..ATP dependent RNA helicase (by orf19.7635         | 603 CaDRS1    | TRANSCRIPTION ""PROTEIN FATE [folding modification destination] ""RNA binding,helicase activity |                                  |
| CA6030 | 0.9 | 1.0 | 1.0 | 0.9 | 0.9 | 1.0 | YHB2      | complemer flavohemoprotein (by homology) orf19.7637         | 599 CaYHB2    | CELL RESCUE DEFENSE AND VIRULENCE ""SUBCELLULAR LOCALISATION                                    |                                  |
| CA6031 | 1.1 | 1.0 | 1.0 | 1.0 | 1.0 | 1.0 | PRO1      | 17687109..glutamate 5-kinase (by homology) orf19.7638       | 597 CaPRO1    | Amino acid metabolism SUBCELLULAR LOCALISATION                                                  | transferase activity             |
| CA6032 | 1.1 | 1.0 | 1.0 | 1.1 | 1.0 | 1.0 | IPF596    | 17688451..similar to Saccharomyces cerevisi orf19.7642      | 596 IPF596    | PROTEIN FATE [folding modification destination] ""SUBCELLULAR LOCmolecular_function unknown     |                                  |
| CA6033 | 1.0 | 1.0 | 1.1 | 1.0 | 1.1 | 1.1 | COQ2      | complemer para-hydroxybenzoate:polyprenyl torf19.7643       | 592 CaCOQ2    | Metabolism of vitamins cofactors and prosthetic groups ""SUBCELLULAF transporter activity       |                                  |
| CA6034 | 0.9 | 0.9 | 1.0 | 1.0 | 1.1 | 1.0 | APC11     | complemer subunit of the anaphase promoting orf19.7644      | 590 CaAPC11   | CELL CYCLE AND DNA PROCESSING ""PROTEIN FATE [folding modil protein binding                     |                                  |
| CA6035 | 0.9 | 1.0 | 1.0 | 1.1 | 1.0 | 1.1 | BPL1      | complemer biotin holocarboxylase synthetase orf19.7645      | 589 CaBPL1    | Metabolism of vitamins cofactors and prosthetic groups """"PROTEIN FA ligase activity           |                                  |
| CA6036 | 1.0 | 1.0 | 1.0 | 1.0 | 0.9 | 1.0 | IPF585    | 17694470..unknown function orf19.7646                       | 585 IPF585    | UNCLASSIFIED PROTEINS                                                                           | molecular_function unknown       |
| CA6037 | 1.0 | 1.0 | 1.0 | 1.0 | 1.0 | 0.9 | ERC4      | 17695567..ethionine resistance protein (by ho orf19.7648    | 582 CaERC4    | UNCLASSIFIED PROTEINS                                                                           |                                  |
| CA6038 | 1.0 | 1.1 | 1.0 | 1.0 | 1.0 | 1.0 | LTV1      | 17697084..low-temperature viability protein (b orf19.7650   | 579 CaLTV1    | CELL RESCUE DEFENSE AND VIRULENCE                                                               | molecular_function unknown       |
| CA6039 | 1.0 | 1.0 | 0.9 | 1.0 | 1.1 | 1.0 | CKA1      | 17698544..casein kinase II, catalytic alpha ch orf19.7652   | 576 CaCKA1    | CELL CYCLE AND DNA PROCESSING TRANSCRIPTION SUBCELLUL protein kinase activity                   |                                  |
| CA6040 | 1.0 | 1.0 | 0.8 | 0.6 | 0.8 | 0.9 | CPR6      | 17700062..cyclophilin (by homology) orf19.7654              | 574 CaCPR6    | TRANSCRIPTION ""PROTEIN FATE [folding modification destination] ""chaperone activity            |                                  |
| CA6041 | 1.0 | 1.0 | 0.9 | 1.0 | 1.0 | 0.9 | RPO21     | 17701754..DNA-directed RNA polymerase II, orf19.7655        | 572 CaRPO21   | TRANSCRIPTION SUBCELLULAR LOCALISATION                                                          | nucleotidyltransferase activity  |
| CA6042 | 1.1 | 1.0 | 1.0 | 1.0 | 0.9 | 1.0 | IPF4924   | 17707077..unknown function orf19.7657                       | 4924 IPF4924  | TRANSCRIPTION SUBCELLULAR LOCALISATION                                                          | RNA binding                      |
| CA6043 | 1.0 | 1.0 | 0.9 | 0.9 | 1.0 | 0.9 | RFC4      | 17707814..DNA replication factor C (by homo orf19.7658      | 4926 CaRFC4   | CELL CYCLE AND DNA PROCESSING SUBCELLULAR LOCALISATIO                                           | DNA binding                      |
| CA6044 | 1.0 | 1.0 | 1.0 | 1.0 | 1.0 | 1.0 | IPF4928   | complemer similar to Saccharomyces cerevisi orf19.7660      | 4928 IPF4928  | CELLULAR TRANSPORT AND TRANSPORT MECHANISMS SUBCELL protein binding                             |                                  |
| CA6045 | 0.9 | 1.0 | 0.9 | 1.0 | 1.0 | 0.9 | IPF4929   | 17710477..similar to Saccharomyces cerevisi orf19.7661      | 4929 IPF4929  | CELL CYCLE AND DNA PROCESSING                                                                   | DNA binding,helicase activity    |
| CA6046 | 1.0 | 1.1 | 1.0 | 1.0 | 1.0 | 1.0 | IPF4931   | complemer unknown function orf19.7662                       | 4931 IPF4931  | TRANSPOSABLE ELEMENTS VIRAL AND PLASMID PROTEINS                                                | molecular_function unknown       |
| CA6047 | 1.0 | 1.0 | 1.0 | 1.0 | 1.0 | 1.0 | IPF4933   | 17713493..unknown function orf19.7663                       | 4933 IPF4933  | CELL CYCLE AND DNA PROCESSING CELL FATE                                                         | molecular_function unknown       |
| CA6048 | 0.9 | 0.9 | 0.9 | 1.0 | 1.0 | 1.0 | IPF4934   | complemer unknown function orf19.7664                       | 4934 IPF4934  | TRANSCRIPTION                                                                                   | molecular_function unknown       |
| CA6049 | 1.0 | 1.0 | 1.1 | 1.1 | 1.0 | 0.9 | IPF4935   | complemer unknown function orf19.7665                       | 4935 IPF4935  | UNCLASSIFIED PROTEINS                                                                           | molecular_function unknown       |
| CA6050 | 1.0 | 1.0 | 0.9 | 1.0 | 1.1 | 1.0 | IPF4939   | 17715579..similar to Saccharomyces cerevisi orf19.7666      | 4939 IPF4939  | TRANSPORT FACILITATION                                                                          |                                  |
| CA6051 | 1.1 | 1.0 | 1.1 | 1.0 | 0.9 | 1.0 | IPF4940   | complemer unknown function orf19.7667                       | 4940 IPF4940  | C-compound and carbohydrate metabolism ENERGY                                                   | hydrolase activity               |
| CA6052 | 1.0 | 1.0 | 0.9 | 0.9 | 1.1 | 1.0 | IPF4942   | 17718141..similar to Saccharomyr alpha-gluc orf19.7668      | 4942 IPF4942  | C-compound and carbohydrate metabolism ENERGY SUBCELLULAR L hydrolase activity                  |                                  |
| CA6053 | 1.0 | 0.9 | 1.0 | 1.1 | 1.1 | 1.1 | IPF4949   | complemer unknown function orf19.7670                       | 4949 IPF4949  | UNCLASSIFIED PROTEINS                                                                           | molecular_function unknown       |
| CA6054 | 1.0 | 1.0 | 1.0 | 1.0 | 1.0 | 0.9 | IPF4952   | complemer unknown function orf19.7672                       | 4952 IPF4952  | UNCLASSIFIED PROTEINS                                                                           | molecular_function unknown       |
| CA6055 | 1.0 | 1.0 | 1.0 | 1.0 | 1.1 | 0.9 | SMD1      | 17723811..snRNA-associated protein (by hon orf19.7673       | 4953 CaSMD1   | TRANSCRIPTION SUBCELLULAR LOCALISATION                                                          |                                  |
| CA6056 | 0.9 | 1.0 | 0.9 | 0.9 | 1.1 | 1.1 | IPF4955   | complemer similar to Saccharomyces cerevisi orf19.7675      | 4955 IPF4955  | No significant S.c. match                                                                       | structural molecule activity     |
| CA6057 | 0.3 | 0.3 | 1.6 | 1.4 | 1.1 | 0.7 | IPF4959   | complemer D-xylulose reductase (by homolog orf19.7676       | 4959 IPF4959  | C-compound and carbohydrate metabolism                                                          | oxidoreductase activity          |

|        |     |     |     |     |     |     |             |                                                          |            |       |           |                                                                    |                                                               |
|--------|-----|-----|-----|-----|-----|-----|-------------|----------------------------------------------------------|------------|-------|-----------|--------------------------------------------------------------------|---------------------------------------------------------------|
| CA6058 | 0.9 | 1.0 | 1.0 | 0.9 | 1.0 | 1.0 | ATP16       | complemer F1F0-ATPase complex, F1 delta s                | orf19.7678 | 4961  | CaATP16   | ENERGY CELLULAR TRANSPORT AND TRANSPORT MECHANISMS                 | transporter activity                                          |
| CA6059 | 0.9 | 1.0 | 1.1 | 1.0 | 0.9 | 1.1 | CTA26       | complemer transcriptional activation                     | orf19.7680 | 20034 | CaCTA26   | No significant S.c. match                                          |                                                               |
| CA6060 | 1.0 | 1.1 | 1.0 | 0.9 | 1.0 | 1.1 | IPF8301     | 17728176..unknown function                               | orf19.6008 | 8301  | IPF8301   | UNCLASSIFIED PROTEINS                                              | molecular_function unknown                                    |
| CA6061 | 0.9 | 1.1 | 1.0 | 1.1 | 1.0 | 1.1 | IPF8302     | 17732246..unknown function                               | orf19.6007 | 8302  | IPF8302   | Lipid fatty-acid and isoprenoid metabolism                         |                                                               |
| CA6062 | 1.1 | 1.0 | 0.9 | 1.0 | 1.0 | 1.0 | IPF8307     | 17734108..putative permease (by homology)                | orf19.6005 | 8307  | IPF8307   | C-compound and carbohydrate metabolism                             | SUBCELLULAR LOCALISATION TRANSPORT FACILITATION               |
| CA6063 | 1.0 | 1.0 | 1.0 | 1.1 | 1.0 | 1.1 | IPF8311     | 17738610..unknown function                               | orf19.6003 | 8311  | IPF8311   | UNCLASSIFIED PROTEINS                                              | molecular_function unknown                                    |
| CA6064 | 1.1 | 1.0 | 1.0 | 1.1 | 1.0 | 1.0 | RPL81       | 17740884..60S ribosomal protein L7a.e.B (by              | orf19.6002 | 8312  | CaRPL81   | PROTEIN SYNTHESIS SUBCELLULAR LOCALISATION                         | structural molecule activity                                  |
| CA6065 | 1.0 | 1.0 | 1.0 | 1.0 | 1.0 | 1.0 | SAP3        | complemer secreted aspartyl prote secreted as            | orf19.6001 | 8313  | CaSAP3    | PROTEIN FATE [folding modification destination]                    | ""Other virulence attributes                                  |
| CA6066 | 1.6 | 2.5 | 1.2 | 1.8 | 1.2 | 1.4 | CDR1        | complemer multidrug resistance pr CDR1 [Car              | orf19.6000 | 9739  | CaCDR1    | Lipid fatty-acid and isoprenoid metabolism                         | ""CELL RESCUE DEFENSE transporter activity                    |
| CA6067 | 1.0 | 1.1 | 1.0 | 1.1 | 0.9 | 1.1 | DYN1        | 17751047..dynein heavy chain, cytosolic (by              | orf19.5999 | 19819 | CaDYN1    | CELL CYCLE AND DNA PROCESSING CELLULAR TRANSPORT AND               | motor activity                                                |
| CA6068 | 1.0 | 1.2 | 0.9 | 0.8 | 0.8 | 1.0 | RPS19A.3    | complemer ribosomal protein S19.e, 3-prime end (by       | orf19.5992 | 4849  | CaRPS19A  | PROTEIN SYNTHESIS SUBCELLULAR LOCALISATION                         | structural molecule activity                                  |
| CA6069 | 1.0 | 1.0 | 0.9 | 1.0 | 1.0 | 0.9 | IPF4847     | 17766009..unknown function                               | orf19.5995 | 4847  | IPF4847   | UNCLASSIFIED PROTEINS                                              | peptidase activity                                            |
| CA6070 | 1.0 | 1.0 | 1.0 | 0.8 | 1.1 | 1.1 | IPF4842     | complemer similar to Saccharomyces cerevisi              | orf19.5994 | 4842  | IPF4842   | CELLULAR COMMUNICATION/SIGNAL TRANSDUCTION MECHANISM               | hydrolase activity                                            |
| CA6071 | 0.9 | 1.0 | 1.1 | 1.1 | 1.1 | 1.1 | IPF4835     | complemer zinc finger protein (by homology)              | orf19.5992 | 4835  | IPF4835   | Amino acid metabolism TRANSCRIPTION SUBCELLULAR LOCALISATION       | UNCLASSIFIED PROTEINS                                         |
| CA6072 | 1.0 | 1.1 | 1.0 | 1.0 | 1.0 | 1.1 | DBP10       | 17787135..Putative ATP-dependent RNA heli                | orf19.5991 | 6     | CaDBP10   | TRANSCRIPTION                                                      | RNA binding,helicase activity                                 |
| CA6073 | 1.1 | 1.1 | 1.0 | 1.0 | 1.1 | 1.0 | HRP1        | complemer Nuclear polyadenylated RNA-bind                | orf19.5989 | 9     | CaHRP1    | TRANSCRIPTION SUBCELLULAR LOCALISATION                             | RNA binding                                                   |
| CA6074 | 0.9 | 0.9 | 1.1 | 1.0 | 1.0 | 1.0 | IPF11       | 17792199..unknown function                               | orf19.5987 | 11    | IPF11     | UNCLASSIFIED PROTEINS                                              | transferase activity                                          |
| CA6075 | 1.0 | 1.0 | 1.0 | 1.0 | 1.0 | 1.0 | THI4        | 17793918..Thiazole biosynthetic enzyme prec              | orf19.5986 | 14    | CaTHI4    | Metabolism of vitamins cofactors and prosthetic groups             | ""CELL CYCLE / molecular_function unknown                     |
| CA6076 | 1.0 | 1.0 | 0.9 | 0.9 | 1.0 | 1.0 | PAC10.3     | 17795269..Non-native Actin Binding Complex               | orf19.5985 | 15    | CaPAC10.3 | CELL CYCLE AND DNA PROCESSING                                      | ""PROTEIN FATE [folding modifi protein binding                |
| CA6077 | 1.0 | 0.9 | 0.9 | 1.0 | 1.0 | 1.0 | IPF16       | complemer unknown function                               | orf19.5984 | 16    | IPF16     | UNCLASSIFIED PROTEINS                                              | molecular_function unknown                                    |
| CA6079 | 0.8 | 1.0 | 0.9 | 0.6 | 0.8 | 1.0 | RPL18.EXON2 | 17797253..Ribosomal Protein RPL18B (large                | orf19.5982 | 20    | CaRPL18.ε | PROTEIN SYNTHESIS SUBCELLULAR LOCALISATION                         | structural molecule activity                                  |
| CA6080 | 1.0 | 1.0 | 1.0 | 0.9 | 1.0 | 1.0 | IPF21       | 17798643..unknown function                               | orf19.5980 | 21    | IPF21     | UNCLASSIFIED PROTEINS                                              |                                                               |
| CA6081 | 0.9 | 1.0 | 1.0 | 0.9 | 1.0 | 1.0 | IPF24       | complemer reductase (by homology)                        | orf19.5978 | 24    | IPF24     | UNCLASSIFIED PROTEINS                                              |                                                               |
| CA6082 | 0.9 | 0.9 | 1.0 | 1.0 | 0.9 | 1.0 | CEM1        | complemer 3-oxoacyl-[acyl-carrier-protein]-syr           | orf19.5977 | 25    | CaCEM1    | Lipid fatty-acid and isoprenoid metabolism                         | ""ENERGY SUBCELLULAR L transferase activity                   |
| CA6083 | 1.1 | 1.0 | 1.0 | 0.9 | 1.0 | 1.0 | IPF26       | complemer unknown function                               | orf19.5976 | 26    | IPF26     | UNCLASSIFIED PROTEINS                                              | molecular_function unknown                                    |
| CA6084 | 1.0 | 1.1 | 1.0 | 1.0 | 1.0 | 1.0 | IPF29       | complemer zinc finger protein (by homology)              | orf19.5975 | 29    | IPF29     | C-compound and carbohydrate metabolism                             | TRANSCRIPTION SUBCELLULAR LOCALISATION                        |
| CA6085 | 1.1 | 1.1 | 1.1 | 1.0 | 1.0 | 1.0 | IPF32       | 17809845..similar to Saccharomyces cerevisi              | orf19.5974 | 32    | IPF32     | SUBCELLULAR LOCALISATION TRANSPORT FACILITATION                    | molecular_function unknown                                    |
| CA6086 | 1.1 | 1.0 | 0.9 | 0.9 | 1.1 | 1.0 | PHB2        | complemer Mitochondrial protein, prohibitin              | orf19.5973 | 33    | CaPHB2    | CELL CYCLE AND DNA PROCESSING                                      | molecular_function unknown                                    |
| CA6087 | 1.0 | 1.0 | 1.0 | 1.0 | 0.9 | 1.0 | YHV1        | complemer unknown function                               | orf19.5971 | 36    | CaYHV1    | UNCLASSIFIED PROTEINS                                              | molecular_function unknown                                    |
| CA6088 | 1.0 | 1.1 | 1.0 | 0.9 | 1.0 | 1.0 | HPR5        | 17816175..ATP-dependent DNA Helicase (by                 | orf19.5970 | 37    | CaHPR5    | CELL CYCLE AND DNA PROCESSING SUBCELLULAR LOCALISATIO              | DNA binding,helicase activity                                 |
| CA6089 | 1.0 | 1.0 | 1.1 | 1.0 | 1.0 | 1.0 | RD11        | complemer Rho GDP dissociation inhibitor (by             | orf19.5968 | 40    | CaRD11    | CELL FATE SUBCELLULAR LOCALISATION PROTEIN ACTIVITY REG            | signal transducer activity                                    |
| CA6090 | 1.0 | 1.0 | 1.0 | 1.0 | 0.9 | 1.0 | IPF44       | complemer unknown function                               | orf19.5967 | 44    | IPF44     | UNCLASSIFIED PROTEINS                                              | molecular_function unknown                                    |
| CA6091 | 1.1 | 1.2 | 1.1 | 1.1 | 1.2 | 1.1 | UFD2        | 17822692..Ubiquitin fusion degradation protei            | orf19.5965 | 46    | CaUFD2    | PROTEIN FATE [folding modification destination]                    |                                                               |
| CA6092 | 1.0 | 1.0 | 0.9 | 0.8 | 1.0 | 1.1 | RPL35.3     | complemer Ribosomal protein L35A, 3-prime end (by        | orf19.5964 | 47    | CaRPL35.3 | PROTEIN SYNTHESIS SUBCELLULAR LOCALISATION                         | structural molecule activity                                  |
| CA6093 | 1.0 | 0.9 | 0.9 | 0.8 | 1.0 | 1.1 | ARF22       | complemer GTP-binding protein of the ARF fa              | orf19.5964 | 50    | CaARF22   | PROTEIN FATE [folding modification destination]                    | ""CELLULAR TRANSP hydrolase activity                          |
| CA6094 | 1.0 | 1.0 | 1.0 | 1.0 | 1.0 | 1.0 | IPF53       | complemer unknown function                               | orf19.5963 | 53    | IPF53     | UNCLASSIFIED PROTEINS                                              | molecular_function unknown                                    |
| CA6095 | 1.0 | 1.0 | 1.0 | 1.0 | 1.0 | 1.1 | SNF3        | 17831851..High affinity glucose transport prot           | orf19.5962 | 55    | CaSNF3    | C-compound and carbohydrate metabolism                             | CELLULAR TRANSPORT A signal transducer activity               |
| CA6096 | 1.1 | 1.0 | 0.9 | 1.0 | 1.0 | 1.1 | IPF56       | 17834497..similar to Saccharomyces cerevisi              | orf19.5961 | 56    | IPF56     | PROTEIN FATE [folding modification destination]                    | ""SUBCELLULAR LOC molecular_function unknown                  |
| CA6097 | 0.8 | 0.6 | 1.7 | 1.1 | 1.1 | 0.9 | NCE102      | 17837654..secretion of proteins that lack clas           | orf19.5960 | 59    | CaNCE102  | CELLULAR TRANSPORT AND TRANSPORT MECHANISMS                        | molecular_function unknown                                    |
| CA6098 | 1.0 | 1.1 | 1.0 | 1.1 | 1.0 | 1.1 | IPF61       | complemer unknown function                               | orf19.5959 | 61    | IPF61     | PROTEIN SYNTHESIS                                                  | RNA binding                                                   |
| CA6099 | 1.0 | 1.0 | 1.0 | 1.1 | 1.1 | 0.9 | CDR2        | complemer Candida albicans drug drug resist              | orf19.5958 | 63    | CaCDR2    | Lipid fatty-acid and isoprenoid metabolism                         | ""CELL RESCUE DEFENSE AND VIRULENCE ""REGULATIO               |
| CA6100 | 1.0 | 0.8 | 0.7 | 0.7 | 0.8 | 0.9 | IPF66       | complemer unknown function                               | orf19.5956 | 66    | IPF66     | UNCLASSIFIED PROTEINS                                              | molecular_function unknown                                    |
| CA6101 | 1.0 | 1.0 | 1.0 | 1.0 | 1.1 | 0.9 | SPO70.3F    | complemer involved in meiosis and sporulation, 3-prime e | orf19.5954 | 68    | CaSPO70.3 | CELL CYCLE AND DNA PROCESSING                                      | ""PROTEIN FATE [folding modification destination]             |
| CA6102 | 1.0 | 1.0 | 1.1 | 1.1 | 1.0 | 1.0 | SPO70.5F    | complemer involved in meiosis and sporulation            | orf19.5954 | 70    | CaSPO70.5 | CELL FATE                                                          | molecular_function unknown                                    |
| CA6103 | 1.0 | 1.0 | 1.0 | 1.0 | 1.1 | 1.0 | SFP1        | complemer zinc finger protein (by homology)              | orf19.5953 | 72    | CaSFP1    | CELL CYCLE AND DNA PROCESSING CELL FATE SUBCELLULAR LOC            | DNA binding,transcription regulato                            |
| CA6104 | 1.0 | 1.0 | 0.9 | 1.0 | 1.0 | 1.0 | IPF65       | 17856243..unknown function                               | orf19.5952 | 75    | IPF65     | UNCLASSIFIED PROTEINS                                              |                                                               |
| CA6105 | 1.0 | 1.1 | 1.1 | 1.4 | 1.2 | 1.1 | FAS2.5F     | 17858538..fatty-acyl-CoA synthase, alpha ch              | orf19.5951 | 76    | CaFAS2.5f | Lipid fatty-acid and isoprenoid metabolism                         | ""PROTEIN FATE [folding modification destination]             |
| CA6106 | 1.1 | 1.0 | 1.0 | 1.3 | 1.2 | 1.3 | FAS2.53F    | 17860953..fatty-acyl-CoA synthase, alpha chain, internal | orf19.5951 | 77    | CaFAS2.5f | Lipid fatty-acid and isoprenoid metabolism                         | ""PROTEIN FATE [folding modification destination]             |
| CA6107 | 1.0 | 1.0 | 1.0 | 1.3 | 1.1 | 1.4 | FAS2.3F     | 17861433..fatty-acyl-CoA synthas fatty acid s            | orf19.5949 | 80    | CaFAS2.3f | Lipid fatty-acid and isoprenoid metabolism                         | ""PROTEIN FATE [folding m oxidoreductase activity,transferase |
| CA6108 | 1.1 | 1.0 | 1.0 | 1.0 | 1.0 | 1.2 | SEC7        | 17864532..Guanine nucleotide exchange prot               | orf19.5947 | 85    | CaSEC7    | CELLULAR TRANSPORT AND TRANSPORT MECHANISMS SUBCELL                | enzyme regulator activity                                     |
| CA6109 | 1.0 | 1.1 | 1.1 | 1.1 | 1.2 | 1.1 | IPF89.3     | 17870899..unknown function, 3-prime end                  | orf19.5943 | 89    | IPF89.3   | C-compound and carbohydrate metabolism                             | CELLULAR COMMUNICATIO DNA binding                             |
| CA6110 | 1.1 | 1.2 | 1.0 | 1.0 | 1.1 | 1.0 | IPF91       | 17872156..unknown function                               | orf19.5943 | 91    | IPF91     | UNCLASSIFIED PROTEINS                                              | molecular_function unknown                                    |
| CA6111 | 1.1 | 1.1 | 1.0 | 1.0 | 1.0 | 1.0 | IPF96       | complemer C3HC4 type zinc finger protein (by             | orf19.5942 | 96    | IPF96     | UNCLASSIFIED PROTEINS                                              | molecular_function unknown                                    |
| CA6112 | 1.0 | 0.9 | 1.0 | 0.9 | 0.9 | 0.9 | IPF97       | 17875727..unknown function                               | orf19.5941 | 97    | IPF97     | CELLULAR TRANSPORT AND TRANSPORT MECHANISMS                        | molecular_function unknown                                    |
| CA6113 | 1.0 | 1.1 | 1.1 | 1.0 | 1.0 | 1.0 | IPF100.3    | 17877348..zinc finger protein, 3-prime end (b)           | orf19.5940 | 100   | IPF100.3  | Amino acid metabolism TRANSCRIPTION SUBCELLULAR LOCALISATION       | UNCLASSIFIED PROTEINS                                         |
| CA6114 | 1.0 | 1.0 | 1.0 | 1.0 | 1.0 | 0.9 | SEN1        | 17879931..positive effector of tRNA-splicing e           | orf19.5938 | 110   | CaSEN1    | TRANSCRIPTION SUBCELLULAR LOCALISATION                             | RNA binding,helicase activity                                 |
| CA6115 | 1.0 | 1.0 | 1.0 | 1.1 | 1.0 | 1.0 | IPF112      | complemer unknown function                               | orf19.5935 | 112   | IPF112    | CELL CYCLE AND DNA PROCESSING SUBCELLULAR LOCALISATION             |                                                               |
| CA6116 | 1.0 | 1.1 | 1.1 | 1.0 | 1.0 | 0.9 | TOP3        | 17888645..DNA topoisomerase III (by homolo               | orf19.5934 | 116   | CaTOP3    | CELL CYCLE AND DNA PROCESSING SUBCELLULAR LOCALISATIO              | isomerase activity                                            |
| CA6117 | 1.1 | 1.0 | 1.0 | 1.1 | 1.1 | 1.0 | IPF122      | 17893301..unknown function                               | orf19.5933 | 122   | IPF122    | No significant S.c. match                                          |                                                               |
| CA6118 | 0.9 | 0.9 | 0.9 | 0.9 | 0.9 | 1.0 | IPF126      | 17895351..unknown function                               | orf19.5932 | 126   | IPF126    | UNCLASSIFIED PROTEINS                                              | molecular_function unknown                                    |
| CA6119 | 0.9 | 0.9 | 1.0 | 0.9 | 0.9 | 1.0 | ARV1        | complemer involved in sterol uptake and distri           | orf19.5931 | 128   | CaARV1    | SUBCELLULAR LOCALISATION                                           | molecular_function unknown                                    |
| CA6120 | 1.0 | 1.0 | 1.0 | 0.9 | 1.0 | 0.9 | IPF132      | complemer unknown function                               | orf19.5930 | 132   | IPF132    | TRANSCRIPTION CELLULAR TRANSPORT AND TRANSPORT MECHANISMS          | SUBCELLULAR LOCALIS                                           |
| CA6121 | 1.0 | 1.0 | 1.0 | 0.9 | 0.9 | 1.0 | IPF33       | 17900332..unknown function                               | orf19.5929 | 133   | IPF33     | No significant S.c. match                                          |                                                               |
| CA6122 | 1.0 | 0.9 | 0.8 | 0.8 | 0.9 | 1.1 | RPP2B       | complemer acidic ribosomal protein (by homol             | orf19.5928 | 134   | CaRPP2B   | PROTEIN SYNTHESIS SUBCELLULAR LOCALISATION                         | structural molecule activity                                  |
| CA6123 | 1.0 | 1.2 | 0.9 | 1.1 | 0.9 | 1.1 | RPS15.3     | 17902660..40S ribosomal protein S15, 3-prim              | orf19.5927 | 135   | CaRPS15.3 | PROTEIN SYNTHESIS SUBCELLULAR LOCALISATION                         | structural molecule activity                                  |
| CA6124 | 1.0 | 1.0 | 1.1 | 1.0 | 0.9 | 1.0 | ARG11       | 17903567..mitochondrial amino acid transport             | orf19.5926 | 137   | CaARG11   | Amino acid metabolism CELLULAR TRANSPORT AND TRANSPORT             | transporter activity                                          |
| CA6125 | 1.1 | 1.2 | 1.0 | 1.1 | 1.2 | 1.0 | IPF138      | complemer unknown function                               | orf19.5925 | 138   | IPF138    | UNCLASSIFIED PROTEINS                                              | molecular_function unknown                                    |
| CA6126 | 1.0 | 1.1 | 1.0 | 1.0 | 1.0 | 1.0 | IPF143      | complemer unknown function                               | orf19.5924 | 143   | IPF143    | TRANSCRIPTION ""CELL RESCUE DEFENSE AND VIRULENCE                  | ""SUBCELLULAR LOCALISATION                                    |
| CA6127 | 1.1 | 1.1 | 1.0 | 0.9 | 1.0 | 0.7 | IPF149      | complemer peroxisomal membrane protein (by               | orf19.5921 | 149   | IPF149    | CELLULAR TRANSPORT AND TRANSPORT MECHANISMS TRANSPORT FACILITATION |                                                               |
| CA6128 | 0.9 | 1.0 | 1.2 | 1.0 | 1.1 | 1.0 | IPF152      | complemer unknown function                               | orf19.5919 | 152   | IPF152    | UNCLASSIFIED PROTEINS                                              | molecular_function unknown                                    |
| CA6129 | 1.0 | 1.1 | 1.0 | 1.0 | 1.1 | 1.1 | YRA1.EXON2  | complemer RNA annealing protein, exon 2 (by              | orf19.5917 | 155   | CaYRA1.e  | TRANSCRIPTION SUBCELLULAR LOCALISATION                             | molecular_function unknown                                    |
| CA6131 | 0.9 | 1.1 | 1.1 | 1.0 | 1.0 | 1.0 | IPF4369     | complemer similar to Saccharomyces cerevisi              | orf19.5917 | 4369  | IPF4369   | TRANSCRIPTION                                                      |                                                               |

|        |     |     |     |     |     |     |            |                                               |            |       |            |                                                      |                                        |                                     |                                  |
|--------|-----|-----|-----|-----|-----|-----|------------|-----------------------------------------------|------------|-------|------------|------------------------------------------------------|----------------------------------------|-------------------------------------|----------------------------------|
| CA6132 | 1.0 | 0.9 | 1.0 | 1.1 | 1.0 | 1.0 | DUR35.5F   | 17927011..Urea transport protein, 5-prime en  | orf19.5916 | 4365  | CaDUR35.   | REGULATION OF/INTERACTION WITH CELLULAR ENVIRONMENT  | SUBCELLULAR LOCALISATION               | TF                                  |                                  |
| CA6133 | 0.9 | 0.9 | 1.0 | 1.0 | 1.0 | 0.9 | DUR35.3F   | 17927715..Urea transport protein, 3-prime en  | orf19.5915 | 4364  | CaDUR35.   | REGULATION OF/INTERACTION WITH CELLULAR ENVIRONMENT  | SUBCELLULAR LOCALISATION               | TF                                  |                                  |
| CA6134 | 1.1 | 1.1 | 1.1 | 0.9 | 1.1 | 1.0 | MAK21      | complemer Ribosome biogenesis protein (by     | orf19.5912 | 4362  | CaMAK21    | PROTEIN SYNTHESIS CONTROL OF CELLULAR ORGANIZATION   | molecular_function                     | unknown                             |                                  |
| CA6135 | 1.0 | 1.0 | 0.9 | 1.0 | 1.0 | 1.1 | CMK1       | 17933003..Ca2+/calmodulin-dependent ser/thr   | orf19.5911 | 4358  | CaCMK1     | CELLULAR COMMUNICATION/SIGNAL TRANSDUCTION MECHANISM | CELL FATE                              | SUBCELLULAR LO                      |                                  |
| CA6137 | 1.0 | 1.0 | 0.9 | 1.0 | 1.0 | 0.9 | IPF4356    | complemer unknown function                    | orf19.5910 | 4356  | IPF4356    | TRANSCRIPTION                                        | molecular_function                     | unknown                             |                                  |
| CA6138 | 0.8 | 0.5 | 1.0 | 0.8 | 1.0 | 0.8 | IPF4351    | 17942827..unknown function                    | orf19.5908 | 4351  | IPF4351    | TRANSCRIPTION                                        | CELL FATE                              | SUBCELLULAR LOCALISATION            |                                  |
| CA6139 | 1.1 | 1.1 | 1.0 | 1.1 | 1.1 | 1.0 | ADE2       | 17949698..phosphoribosylaminoimidazole car    | orf19.5906 | 1883  | CaADE2     | Nucleotide metabolism                                | Purine ribonucleotide metabolism       | lyase activity                      |                                  |
| CA6140 | 1.0 | 1.0 | 1.0 | 1.0 | 1.0 | 1.0 | IPF1882    | complemer unknown function                    | orf19.5905 | 1882  | IPF1882    | CELL FATE                                            | molecular_function                     | unknown                             |                                  |
| CA6141 | 1.1 | 1.0 | 1.1 | 1.1 | 1.0 | 1.1 | RPL19A.3   | 17952958..Ribosomal protein L19.e, 3-prime    | orf19.5904 | 1881  | CaRPL19A   | PROTEIN SYNTHESIS                                    | SUBCELLULAR LOCALISATION               | structural molecule activity        |                                  |
| CA6142 | 1.0 | 1.0 | 0.9 | 1.0 | 0.9 | 0.9 | IPF1879    | complemer unknown function                    | orf19.5903 | 1879  | IPF1879    | SUBCELLULAR LOCALISATION                             | molecular_function                     | unknown                             |                                  |
| CA6143 | 1.0 | 1.0 | 1.0 | 1.1 | 1.1 | 0.9 | IPF1873    | 17959419..putative GTP-binding protein (by h  | orf19.5902 | 1873  | IPF1873    | Nucleotide metabolism                                | C-compound and carbohydrate metabolism | CELL CYCLE AND DNA PROCESSING       |                                  |
| CA6144 | 1.0 | 1.0 | 1.0 | 1.0 | 1.0 | 1.2 | PKC1       | complemer Ser/thr protein kinase C            | orf19.5901 | 1872  | CaPKC1     | CELL CYCLE AND DNA PROCESSING                        | ""CELL RESCUE DEFENSE AND              | protein kinase activity             |                                  |
| CA6145 | 1.0 | 1.0 | 1.0 | 1.1 | 1.0 | 1.0 | IPF1869    | complemer unknown function                    | orf19.5897 | 1869  | IPF1869    | UNCLASSIFIED PROTEINS                                | molecular_function                     | unknown                             |                                  |
| CA6146 | 0.9 | 1.0 | 1.0 | 1.1 | 1.1 | 1.0 | IPF1863    | 17968356..unknown function                    | orf19.5896 | 1863  | IPF1863    | ENERGY                                               | molecular_function                     | unknown                             |                                  |
| CA6147 | 0.9 | 0.9 | 1.1 | 1.1 | 1.0 | 1.0 | IPF1862.5F | 17969397..unknown function, 5-prime end       | orf19.5895 | 1862  | IPF1862.5f | UNCLASSIFIED PROTEINS                                |                                        |                                     |                                  |
| CA6148 | 1.0 | 1.0 | 1.0 | 0.9 | 1.0 | 0.8 | IPF1862.3F | 17969860..unknown function, 3-prime end       | orf19.5894 | 1861  | IPF1862.3f | UNCLASSIFIED PROTEINS                                | molecular_function                     | unknown                             |                                  |
| CA6149 | 1.2 | 1.1 | 0.9 | 1.1 | 1.0 | 1.0 | RIP1       | complemer Ubiquinol cytochrome-c reductase    | orf19.5893 | 1859  | CARIP1     | ENERGY                                               | SUBCELLULAR LOCALISATION               | transporter activity,oxidoreductase |                                  |
| CA6150 | 1.0 | 1.0 | 1.1 | 1.0 | 1.0 | 1.0 | IPF1857    | complemer similar to Saccharomyces cerevisi   | orf19.5892 | 1857  | IPF1857    | TRANSCRIPTION                                        | ligase activity                        |                                     |                                  |
| CA6151 | 1.1 | 1.0 | 1.0 | 0.9 | 0.9 | 1.1 | IPF1853    | 17975894..unknown function                    | orf19.5890 | 1853  | IPF1853    | No significant S.c. match                            |                                        |                                     |                                  |
| CA6152 | 1.0 | 1.0 | 1.0 | 1.0 | 1.1 | 1.0 | NUP85      | 17979392..Nuclear pore protein (by homology   | orf19.5887 | 1850  | CaNUP85    | TRANSCRIPTION                                        | CELLULAR TRANSPORT AND TRANSPORT MECH. | structural molecule activity        |                                  |
| CA6153 | 1.1 | 1.0 | 1.0 | 1.0 | 1.0 | 1.0 | CUP5       | complemer Vacuolar H+-ATPase (by homolog      | orf19.5886 | 1849  | CaCUP5     | CELLULAR TRANSPORT AND TRANSPORT MECHANISMS          | ""CELL RESCUE DEFENSE AND VIRULEN      |                                     |                                  |
| CA6154 | 1.3 | 1.1 | 1.0 | 1.1 | 1.1 | 1.0 | IPF1848    | 17983285..similar to Saccharomyces cerevisi   | orf19.5885 | 1848  | IPF1848    | TRANSCRIPTION                                        | RNA binding                            |                                     |                                  |
| CA6155 | 1.1 | 1.0 | 1.1 | 1.0 | 0.9 | 1.0 | IPF1846    | 17983986..unknown function                    | orf19.5884 | 1846  | IPF1846    | UNCLASSIFIED PROTEINS                                | molecular_function                     | unknown                             |                                  |
| CA6156 | 0.9 | 0.9 | 0.9 | 1.0 | 1.0 | 0.9 | GEF1.3F    | complemer Voltage-gated chloride channel pr   | orf19.5881 | 1844  | CaGEF1.3i  | CELLULAR TRANSPORT AND TRANSPORT MECHANISMS          | REGULATION OF/INTERACTION WITH CEI     |                                     |                                  |
| CA6157 | 0.9 | 0.9 | 0.9 | 1.0 | 1.0 | 1.1 | GEF1.5F    | complemer Voltage-gated chloride channel pr   | orf19.5880 | 1841  | CaGEF1.5i  | CELLULAR TRANSPORT AND TRANSPORT MECHANISMS          | REGULA                                 | transporter activity                |                                  |
| CA6158 | 1.0 | 1.0 | 1.1 | 1.1 | 1.0 | 0.9 | IPF1839    | 17990466..putative 1-Acyl dihydroxyacetone    | orf19.5879 | 1839  | IPF1839    | C-compound and carbohydrate metabolism               | CELL FATE                              |                                     |                                  |
| CA6159 | 1.0 | 1.0 | 1.0 | 1.0 | 1.0 | 1.0 | IPF1837    | complemer unknown function                    | orf19.5877 | 1837  | IPF1837    | C-compound and carbohydrate metabolism               | transferase activity                   |                                     |                                  |
| CA6160 | 1.0 | 1.0 | 0.9 | 0.9 | 1.0 | 0.9 | IPF1835    | 17993845..unknown function                    | orf19.5876 | 1835  | IPF1835    | No significant S.c. match                            |                                        |                                     |                                  |
| CA6161 | 1.0 | 1.0 | 0.9 | 1.0 | 1.0 | 1.1 | IPF1834    | complemer probable syntxin (by homology)      | orf19.5875 | 1834  | IPF1834    | PROTEIN FATE [folding modification destination]      | ""CELLULAR TRANSP                      | transporter activity                |                                  |
| CA6162 | 1.0 | 1.0 | 1.1 | 1.0 | 1.0 | 1.0 | IPF1833    | 17995827..similar to opaque phase protein O   | orf19.5874 | 1833  | IPF1833    | No significant S.c. match                            |                                        |                                     |                                  |
| CA6163 | 1.0 | 0.9 | 1.0 | 1.1 | 1.1 | 1.1 | POL1       | 17997165..DNA-directed DNA polymerase al      | orf19.5873 | 1832  | CaPOL1     | CELL CYCLE AND DNA PROCESSING                        | SUBCELLULAR LOCALISATIO                | nucleotidyltransferase activity     |                                  |
| CA6164 | 1.0 | 1.0 | 1.0 | 1.0 | 1.0 | 1.1 | SNF5.5F    | 18001869..Component of SWI/SNF transcript     | orf19.5872 | 14342 | CaSNF5.5f  | No significant S.c. match                            |                                        |                                     |                                  |
| CA6165 | 1.1 | 0.9 | 1.0 | 1.0 | 1.0 | 1.0 | SNF5.3F    | 18002327..Component of SWI/SNF transcript     | orf19.5871 | 14343 | CaSNF5.3f  | C-compound and carbohydrate metabolism               | TRANSCRIPTION                          | CELL FA                             | transcription regulator activity |
| CA6166 | 1.0 | 1.1 | 1.0 | 1.0 | 1.0 | 1.0 | CTP1       | 18007015..Citrate transport protein (by homol | orf19.1329 | 18048 | CaCTP1     | C-compound and carbohydrate metabolism               | CELLULAR TRANSPORT                     | AI                                  | transporter activity             |
